# Supplementary material for: Attenuated sex-related DNA methylation differences in cancer highlight the magnitude bias mediating existing disparities
Source: Biol Sex Differ. 2024 Dec 23;15:106. doi: 10.1186/s13293-024-00682-4 (PMC11664931; doi:10.1186/s13293-024-00682-4)
Supplement: Supplementary file 2 — Supplementary material 2. [file 13293_2024_682_MOESM2_ESM.xlsx]

## Sheet: Sheet1
Cancer	DNA methylation				RNA-seq
	Female		Male		Female		Male
	Cancer	NAT	Cancer	NAT	Cancer	NAT	Cancer	NAT
LIHC	115	20	247	30	111	22	242	28
LUAD	241	15	212	17	259	32	223	25
LUSC	94	13	268	28	123	12	353	37
COAD	125	17	147	21	200	20	228	19
KIRC	108	53	203	105	166	19	323	48
KIRP	61	13	200	31	67	10	206	22
THCA	363	40	134	13	351	40	124	15
BLCA	102	10	299	11	103	8	292	6
HNSC	136	12	380	33	132	10	364	21
Total	1345	193	2090	289	1512	173	2355	221
