# Supplementary material for: Attenuated sex-related DNA methylation differences in cancer highlight the magnitude bias mediating existing disparities
Source: Biol Sex Differ. 2024 Dec 23;15:106. doi: 10.1186/s13293-024-00682-4 (PMC11664931; doi:10.1186/s13293-024-00682-4)
Supplement: Supplementary file 3 — Supplementary material 3. [file 13293_2024_682_MOESM3_ESM.xlsx]

## Sheet: sDMPs in Cancers
sDMP	meanDiff	tstat	pval	bonf	meanFemale	meanMale	Cancer group
cg00008945	-0.238432	-10.249	3.99855e-13	1.45502e-07	0.259325	0.0287726	LIHC
cg00011200	-0.336975	-14.0475	1.10286e-17	4.01314e-12	0.361078	0.0282331	LIHC
cg00011891	-0.363262	-23.29	4.93457e-26	1.79562e-20	0.378776	0.0243079	LIHC
cg00016522	-0.288055	-9.78191	1.65146e-12	6.00944e-07	0.336326	0.0374392	LIHC
cg00026186	-0.378315	-36.2707	6.48772e-34	2.36079e-28	0.385783	0.0159462	LIHC
cg00072288	-0.300856	-11.3789	1.45287e-14	5.28679e-09	0.328636	0.0335249	LIHC
cg00112256	-0.407135	-22.1149	3.87611e-25	1.41046e-19	0.429339	0.0271288	LIHC
cg00114625	-0.43603	-34.0972	8.50763e-33	3.09581e-27	0.452957	0.0210494	LIHC
cg00192980	-0.300492	-15.767	1.68658e-19	6.13722e-14	0.340932	0.0403066	LIHC
cg00200463	-0.377585	-21.7771	7.13265e-25	2.59547e-19	0.417249	0.0330609	LIHC
cg00241296	-0.151501	-9.15596	1.15281e-11	4.19492e-06	0.192316	0.0318583	LIHC
cg00264378	-0.277033	-12.3548	9.4716e-16	3.44658e-10	0.308446	0.0298683	LIHC
cg00373606	-0.295957	-19.9649	2.16193e-23	7.86696e-18	0.339207	0.0445556	LIHC
cg00374088	-0.244802	-12.136	1.72842e-15	6.28946e-10	0.289633	0.061198	LIHC
cg00391044	-0.219201	-9.0371	1.67617e-11	6.09934e-06	0.262805	0.0520801	LIHC
cg00399450	-0.363682	-19.1707	1.04465e-22	3.80132e-17	0.392242	0.0299978	LIHC
cg00416689	-0.142305	-6.5902	5.02663e-08	0.0182912	0.189537	0.0390194	LIHC
cg00458505	-0.397679	-18.453	4.53774e-22	1.65122e-16	0.428729	0.039542	LIHC
cg00466309	-0.385261	-14.9926	1.06401e-18	3.87179e-13	0.406861	0.0240263	LIHC
cg00473354	-0.150201	-12.2437	1.28431e-15	4.67343e-10	0.174249	0.0283196	LIHC
cg00478198	-0.322882	-19.6715	3.84588e-23	1.39946e-17	0.384396	0.0592258	LIHC
cg00575851	-0.208165	-6.91694	1.68466e-08	0.00613023	0.372842	0.167917	LIHC
cg00611101	-0.153605	-11.2323	2.21284e-14	8.05222e-09	0.183818	0.0249455	LIHC
cg00621925	-0.206591	-7.24138	5.71512e-09	0.00207965	0.267706	0.0447013	LIHC
cg00622384	-0.272106	-17.4196	4.075e-21	1.48283e-15	0.295928	0.0239227	LIHC
cg00645049	-0.416349	-21.9172	5.53343e-25	2.01354e-19	0.457122	0.0454107	LIHC
cg00661180	-0.206464	-7.73	1.13606e-09	0.000413397	0.262074	0.0521532	LIHC
cg00666173	-0.367908	-8.01527	4.46217e-10	0.000162372	0.516587	0.124414	LIHC
cg00680673	-0.388814	-22.8846	9.94538e-26	3.61898e-20	0.393536	0.0238171	LIHC
cg00685925	-0.287746	-14.1294	8.96902e-18	3.2637e-12	0.324874	0.0426789	LIHC
cg00727483	-0.215899	-10.8262	7.20203e-14	2.62072e-08	0.240049	0.0223129	LIHC
cg00729461	-0.356625	-7.32549	4.32252e-09	0.0015729	0.423785	0.122147	LIHC
cg00739467	-0.358096	-18.6643	2.93118e-22	1.06662e-16	0.385523	0.0309307	LIHC
cg00769799	-0.243515	-10.8801	6.15051e-14	2.23809e-08	0.298573	0.0559675	LIHC
cg00810519	-0.370268	-20.3337	1.05824e-23	3.8508e-18	0.376933	0.0206569	LIHC
cg00818649	-0.1409	-9.64299	2.5314e-12	9.2114e-07	0.166421	0.0227987	LIHC
cg00832270	-0.359999	-26.5416	2.54093e-28	9.24609e-23	0.371177	0.0146732	LIHC
cg00849191	-0.276466	-6.57475	5.29381e-08	0.0192634	0.496282	0.249114	LIHC
cg00895705	-0.196083	-10.1972	4.67349e-13	1.70062e-07	0.233556	0.0325295	LIHC
cg00904184	-0.332257	-17.1969	6.6256e-21	2.41096e-15	0.375197	0.0557384	LIHC
cg00935924	-0.182255	-7.502	2.40916e-09	0.000876661	0.381629	0.199568	LIHC
cg00968771	-0.175674	-7.07167	1.00535e-08	0.00365832	0.342217	0.170248	LIHC
cg00996177	-0.303498	-17.8202	1.7201e-21	6.2592e-16	0.31362	0.015099	LIHC
cg01000789	-0.282996	-14.2646	6.38677e-18	2.32405e-12	0.30881	0.0283002	LIHC
cg01056373	-0.264115	-13.5288	4.15898e-17	1.51339e-11	0.35847	0.0920221	LIHC
cg01058588	-0.301493	-13.8454	1.8427e-17	6.70533e-12	0.324168	0.0190799	LIHC
cg01062269	-0.284291	-13.0916	1.3059e-16	4.75198e-11	0.299188	0.0242401	LIHC
cg01083397	-0.134616	-10.7615	8.70866e-14	3.16896e-08	0.25212	0.117481	LIHC
cg01120006	-0.16159	-7.00928	1.23779e-08	0.00450413	0.26374	0.0913024	LIHC
cg01120894	-0.339703	-7.82147	8.41274e-10	0.000306128	0.431897	0.14141	LIHC
cg01142317	-0.186983	-12.0962	1.92959e-15	7.0215e-10	0.209333	0.0215698	LIHC
cg01150083	-0.196218	-9.81916	1.47336e-12	5.36136e-07	0.214038	0.0249066	LIHC
cg01191902	-0.191718	-11.7025	5.79658e-15	2.10929e-09	0.258456	0.060002	LIHC
cg01303569	-0.334836	-20.3121	1.10326e-23	4.01462e-18	0.350104	0.0237382	LIHC
cg01318188	-0.37627	-17.883	1.5046e-21	5.47503e-16	0.422289	0.0612409	LIHC
cg01333849	-0.0613522	-6.2906	1.37265e-07	0.049949	0.0991652	0.0372472	LIHC
cg01353788	-0.219682	-8.12317	3.1395e-10	0.000114242	0.275562	0.0696192	LIHC
cg01364818	-0.320104	-14.4535	3.98887e-18	1.45149e-12	0.344405	0.0245832	LIHC
cg01370077	-0.337146	-11.3706	1.48761e-14	5.4132e-09	0.376702	0.0358597	LIHC
cg01374431	-0.202106	-10.4893	1.94871e-13	7.09107e-08	0.262462	0.055003	LIHC
cg01397290	-0.283883	-13.6709	2.88183e-17	1.04866e-11	0.318542	0.0351127	LIHC
cg01434723	-0.187425	-13.1839	1.02368e-16	3.72501e-11	0.235983	0.0396765	LIHC
cg01477427	-0.253488	-13.0722	1.37459e-16	5.00193e-11	0.287582	0.0388895	LIHC
cg01533115	-0.241662	-8.29824	1.77894e-10	6.47331e-05	0.257821	0.0183392	LIHC
cg01543116	-0.195261	-7.22593	6.01627e-09	0.00218924	0.29444	0.0875556	LIHC
cg01555661	-0.245792	-12.4628	7.0537e-16	2.56674e-10	0.281897	0.0441052	LIHC
cg01742836	-0.482834	-21.5978	9.88981e-25	3.59876e-19	0.522756	0.0287641	LIHC
cg01755617	-0.249876	-11.5936	7.8854e-15	2.86939e-09	0.284136	0.0387415	LIHC
cg01757402	-0.0830907	-6.80558	2.44421e-08	0.00889416	0.143106	0.0475887	LIHC
cg01773478	-0.205306	-9.98692	8.83168e-13	3.21372e-07	0.276358	0.057844	LIHC
cg01777017	-0.278687	-14.2933	5.94359e-18	2.16279e-12	0.339358	0.0562732	LIHC
cg01807728	-0.31853	-14.5928	2.82571e-18	1.02824e-12	0.33585	0.0230367	LIHC
cg01825872	-0.269042	-10.3918	2.6062e-13	9.48359e-08	0.313116	0.0643596	LIHC
cg01832419	-0.320738	-14.9734	1.1148e-18	4.05661e-13	0.338274	0.0216942	LIHC
cg01850541	-0.157748	-9.52226	3.67629e-12	1.33775e-06	0.227585	0.0618247	LIHC
cg01857253	-0.34863	-11.4085	1.33486e-14	4.85738e-09	0.367369	0.031038	LIHC
cg01869765	-0.331927	-15.0957	8.29457e-19	3.01828e-13	0.366976	0.041345	LIHC
cg01913024	-0.157829	-7.85894	7.43997e-10	0.00027073	0.192886	0.035821	LIHC
cg01915804	-0.310489	-16.6053	2.46628e-20	8.97444e-15	0.330691	0.020701	LIHC
cg01938887	-0.0992087	-8.0152	4.46317e-10	0.000162409	0.140923	0.0432986	LIHC
cg01996818	-0.239072	-9.26455	8.20156e-12	2.98443e-06	0.303407	0.0636576	LIHC
cg01999076	-0.203537	-9.55769	3.29439e-12	1.19878e-06	0.260966	0.0578864	LIHC
cg02004156	-0.235538	-12.1882	1.49655e-15	5.44572e-10	0.306066	0.0731309	LIHC
cg02010442	-0.193003	-10.9464	5.06845e-14	1.84434e-08	0.234305	0.0435183	LIHC
cg02035866	-0.283034	-10.7031	1.03428e-13	3.76362e-08	0.300402	0.0213554	LIHC
cg02049865	-0.342264	-15.4947	3.19938e-19	1.16421e-13	0.381417	0.0454209	LIHC
cg02062238	-0.214543	-6.45674	7.86246e-08	0.0286104	0.262982	0.0345302	LIHC
cg02161125	-0.280775	-17.9155	1.40402e-21	5.10904e-16	0.304113	0.0329056	LIHC
cg02161919	-0.233309	-7.23522	5.83335e-09	0.00212267	0.281639	0.0442999	LIHC
cg02195366	-0.435477	-31.3098	2.91288e-31	1.05996e-25	0.447906	0.0205134	LIHC
cg02214597	-0.291479	-10.6226	1.31196e-13	4.77405e-08	0.332313	0.0420455	LIHC
cg02274705	-0.266515	-13.4285	5.39606e-17	1.96355e-11	0.35021	0.0781386	LIHC
cg02283535	-0.3224	-11.8249	4.10837e-15	1.49498e-09	0.363605	0.045676	LIHC
cg02285254	-0.292198	-11.9612	2.80688e-15	1.02139e-09	0.348431	0.0593836	LIHC
cg02288667	-0.340296	-18.4376	4.68574e-22	1.70507e-16	0.372255	0.0453594	LIHC
cg02291897	-0.313732	-18.234	7.16671e-22	2.60786e-16	0.343247	0.0298679	LIHC
cg02293258	-0.22223	-9.28093	7.79182e-12	2.83533e-06	0.256439	0.0385199	LIHC
cg02330362	-0.218069	-8.98386	1.98312e-11	7.21628e-06	0.252303	0.0504381	LIHC
cg02333283	-0.441098	-44.8705	8.58309e-38	3.12326e-32	0.461188	0.019485	LIHC
cg02337670	-0.265825	-13.7271	2.49403e-17	9.07541e-12	0.278357	0.0223219	LIHC
cg02360578	-0.277045	-11.1342	2.93718e-14	1.0688e-08	0.325936	0.0483656	LIHC
cg02386310	-0.240805	-14.5242	3.34762e-18	1.21815e-12	0.272211	0.0378793	LIHC
cg02417823	-0.152949	-6.93788	1.57088e-08	0.00571621	0.216348	0.0644117	LIHC
cg02480419	-0.259444	-14.907	1.30953e-18	4.7652e-13	0.284643	0.0262569	LIHC
cg02510708	-0.356042	-14.8366	1.5542e-18	5.65551e-13	0.390514	0.0414752	LIHC
cg02533866	-0.256489	-7.50522	2.38364e-09	0.000867373	0.330991	0.0690299	LIHC
cg02538330	-0.188362	-8.8429	3.10037e-11	1.12818e-05	0.219268	0.036121	LIHC
cg02540826	-0.306595	-13.2154	9.42176e-17	3.42845e-11	0.32835	0.0297308	LIHC
cg02602528	-0.187035	-11.3917	1.40054e-14	5.09636e-09	0.225116	0.0469796	LIHC
cg02621658	-0.256028	-12.5565	5.46929e-16	1.9902e-10	0.295743	0.0353084	LIHC
cg02623256	-0.296529	-14.4539	3.98417e-18	1.44979e-12	0.30382	0.0182403	LIHC
cg02634083	-0.243039	-13.063	1.40844e-16	5.12511e-11	0.313985	0.0777851	LIHC
cg02714202	-0.136019	-7.34925	3.99502e-09	0.00145373	0.21955	0.0832946	LIHC
cg02772106	-0.329582	-9.14941	1.1768e-11	4.28221e-06	0.46533	0.103419	LIHC
cg02775175	-0.293842	-10.9932	4.4213e-14	1.60885e-08	0.343263	0.0647199	LIHC
cg02803670	-0.203032	-9.3158	6.98738e-12	2.54261e-06	0.231657	0.0378394	LIHC
cg02821380	-0.180381	-12.4925	6.50584e-16	2.36738e-10	0.202948	0.0291542	LIHC
cg02859554	-0.205881	-7.83872	7.95005e-10	0.000289291	0.273929	0.0595035	LIHC
cg02869694	-0.427333	-19.0464	1.34309e-22	4.8873e-17	0.46431	0.0420522	LIHC
cg02883100	-0.187811	-9.78335	1.6442e-12	5.98301e-07	0.38459	0.181643	LIHC
cg02909397	-0.167187	-12.6149	4.66866e-16	1.69886e-10	0.199044	0.0342355	LIHC
cg02921434	-0.291031	-16.742	1.81479e-20	6.60377e-15	0.323937	0.0390798	LIHC
cg02932805	-0.241418	-7.76943	9.97985e-10	0.000363153	0.258672	0.0252264	LIHC
cg02937293	-0.228291	-13.092	1.30435e-16	4.74633e-11	0.291098	0.0686984	LIHC
cg02939364	-0.101338	-7.01642	1.20869e-08	0.00439824	0.132198	0.0326702	LIHC
cg02971902	-0.278077	-14.2812	6.12607e-18	2.22919e-12	0.296361	0.0261052	LIHC
cg02994943	-0.306707	-16.2273	5.81704e-20	2.11674e-14	0.345457	0.0407549	LIHC
cg03104298	-0.299565	-16.1708	6.62101e-20	2.40929e-14	0.385883	0.0911805	LIHC
cg03171708	-0.229941	-11.7649	4.86161e-15	1.76907e-09	0.269689	0.0377293	LIHC
cg03189022	-0.160281	-6.75825	2.86357e-08	0.0104201	0.264428	0.0910239	LIHC
cg03213202	-0.249946	-8.1542	2.83824e-10	0.00010328	0.307337	0.0642256	LIHC
cg03219705	-0.299725	-20.9112	3.53147e-24	1.28505e-18	0.355401	0.0647304	LIHC
cg03244432	-0.265005	-16.7177	1.91628e-20	6.97309e-15	0.282876	0.0195755	LIHC
cg03272642	-0.322681	-17.4867	3.52311e-21	1.28201e-15	0.34491	0.029069	LIHC
cg03280420	-0.242209	-14.1683	8.131e-18	2.95876e-12	0.268577	0.0327623	LIHC
cg03334316	-0.438614	-21.5878	1.00709e-24	3.66467e-19	0.469111	0.0357529	LIHC
cg03335173	-0.224514	-9.99512	8.61437e-13	3.13465e-07	0.260743	0.0361893	LIHC
cg03360374	-0.157074	-9.17237	1.0949e-11	3.98419e-06	0.229276	0.0677522	LIHC
cg03364121	-0.157619	-7.87858	6.97648e-10	0.000253864	0.219653	0.0600004	LIHC
cg03370193	-0.313181	-16.4435	3.55451e-20	1.29343e-14	0.359219	0.0567727	LIHC
cg03391801	-0.404545	-16.7764	1.68034e-20	6.11454e-15	0.427111	0.0281038	LIHC
cg03513471	-0.224313	-15.026	9.81476e-19	3.57145e-13	0.249768	0.0218039	LIHC
cg03517379	-0.198611	-14.1839	7.81904e-18	2.84524e-12	0.248957	0.0550808	LIHC
cg03523199	-0.223625	-12.7123	3.5911e-16	1.30675e-10	0.247238	0.0282671	LIHC
cg03580328	-0.238732	-11.1317	2.95827e-14	1.07647e-08	0.263668	0.0243397	LIHC
cg03605032	-0.362792	-20.9147	3.50793e-24	1.27649e-18	0.387433	0.0203505	LIHC
cg03670113	-0.316002	-16.2446	5.59116e-20	2.03454e-14	0.434433	0.100872	LIHC
cg03679269	-0.251395	-7.2852	4.94097e-09	0.00179795	0.318556	0.0784858	LIHC
cg03691313	-0.331487	-15.8977	1.24368e-19	4.52558e-14	0.385796	0.0451097	LIHC
cg03705894	-0.250966	-13.732	2.46324e-17	8.96338e-12	0.282765	0.0343598	LIHC
cg03717198	-0.153923	-7.13961	8.01732e-09	0.00291739	0.256681	0.117528	LIHC
cg03718079	-0.206999	-7.22048	6.1263e-09	0.00222928	0.274815	0.0434523	LIHC
cg03728850	-0.160185	-7.57398	1.89937e-09	0.000691152	0.205703	0.0438156	LIHC
cg03730082	-0.321241	-15.492	3.22031e-19	1.17183e-13	0.343852	0.0354244	LIHC
cg03748372	-0.309811	-15.4212	3.80826e-19	1.38577e-13	0.363985	0.0661152	LIHC
cg03751162	-0.207571	-8.33826	1.56299e-10	5.68752e-05	0.256196	0.0496308	LIHC
cg03752015	-0.192996	-6.58377	5.13616e-08	0.0186898	0.214029	0.0270839	LIHC
cg03759948	-0.256078	-16.7923	1.62165e-20	5.90096e-15	0.290897	0.0504793	LIHC
cg03825574	-0.311458	-19.3347	7.51352e-23	2.73406e-17	0.371874	0.0669257	LIHC
cg03831206	-0.207156	-15.8939	1.25489e-19	4.56638e-14	0.242739	0.0410129	LIHC
cg03892808	-0.307918	-9.86782	1.26965e-12	4.62009e-07	0.353148	0.0891366	LIHC
cg03894002	-0.230106	-9.34299	6.41871e-12	2.33568e-06	0.350245	0.104781	LIHC
cg03900860	-0.317478	-17.4361	3.93167e-21	1.43068e-15	0.337433	0.0254032	LIHC
cg03905487	-0.384646	-20.4471	8.51446e-24	3.09829e-18	0.415492	0.0394073	LIHC
cg03906572	-0.256697	-6.53991	5.9495e-08	0.0216494	0.373887	0.138759	LIHC
cg03944921	-0.383529	-26.1835	4.41107e-28	1.60513e-22	0.431551	0.0504127	LIHC
cg03959273	-0.134498	-8.07854	3.63046e-10	0.000132108	0.31525	0.186675	LIHC
cg03971283	-0.133926	-7.32617	4.31288e-09	0.0015694	0.151613	0.0297946	LIHC
cg03983969	-0.258737	-20.6967	5.29273e-24	1.92595e-18	0.277065	0.026943	LIHC
cg03989304	-0.343436	-19.5975	4.45236e-23	1.62015e-17	0.396439	0.0553449	LIHC
cg04027312	-0.355578	-22.5318	1.8464e-25	6.71881e-20	0.382782	0.0251669	LIHC
cg04029282	-0.134227	-9.46369	4.40861e-12	1.60423e-06	0.205697	0.0719973	LIHC
cg04031645	-0.197627	-7.58074	1.85751e-09	0.000675923	0.249196	0.0470915	LIHC
cg04075675	-0.288095	-15.1441	7.38323e-19	2.68665e-13	0.312443	0.0262871	LIHC
cg04094482	-0.347008	-17.3521	4.71972e-21	1.71744e-15	0.371288	0.0316585	LIHC
cg04128303	-0.295215	-16.7689	1.70869e-20	6.21767e-15	0.375819	0.0673231	LIHC
cg04149024	-0.388494	-35.5987	1.41533e-33	5.15018e-28	0.428937	0.0412795	LIHC
cg04190662	-0.244416	-7.50676	2.37157e-09	0.00086298	0.292329	0.0472567	LIHC
cg04216286	-0.148422	-8.8285	3.24561e-11	1.18103e-05	0.172572	0.0243436	LIHC
cg04288012	-0.20073	-15.1976	6.49227e-19	2.36245e-13	0.22047	0.0266093	LIHC
cg04292836	-0.321785	-14.1559	8.3888e-18	3.05257e-12	0.351615	0.0299277	LIHC
cg04298609	-0.149626	-9.58861	2.994e-12	1.08948e-06	0.182236	0.0284039	LIHC
cg04302178	-0.329891	-16.9994	1.02362e-20	3.72481e-15	0.3544	0.0249646	LIHC
cg04317640	-0.383903	-22.8828	9.97733e-26	3.63061e-20	0.41109	0.0332365	LIHC
cg04327763	-0.34004	-18.643	3.06247e-22	1.11439e-16	0.384614	0.0476514	LIHC
cg04344997	-0.306993	-15.7535	1.7406e-19	6.33379e-14	0.338642	0.0360153	LIHC
cg04371001	-0.349524	-26.3627	3.34436e-28	1.21697e-22	0.456736	0.101993	LIHC
cg04376185	-0.362273	-19.0812	1.2517e-22	4.55478e-17	0.381043	0.0303767	LIHC
cg04388383	-0.316895	-14.3025	5.80887e-18	2.11377e-12	0.371226	0.0535865	LIHC
cg04402486	-0.230592	-9.43602	4.80434e-12	1.74823e-06	0.280359	0.0527663	LIHC
cg04406445	-0.261029	-16.0295	9.16652e-20	3.33557e-14	0.382656	0.114498	LIHC
cg04419618	-0.286609	-15.9035	1.22705e-19	4.46505e-14	0.341741	0.0662616	LIHC
cg04424654	-0.238264	-7.75588	1.04341e-09	0.000379683	0.262551	0.031351	LIHC
cg04524851	-0.384631	-25.0068	2.83533e-27	1.03174e-21	0.41335	0.0239916	LIHC
cg04552106	-0.270619	-14.0244	1.16926e-17	4.25476e-12	0.292785	0.0296016	LIHC
cg04624564	0.214859	13.2479	8.65005e-17	3.14763e-11	0.737411	0.944223	LIHC
cg04626171	-0.275327	-16.0136	9.50851e-20	3.46002e-14	0.305023	0.0308151	LIHC
cg04663649	-0.11991	-6.89343	1.82229e-08	0.00663107	0.182685	0.0584193	LIHC
cg04665139	-0.250048	-11.2082	2.37169e-14	8.63025e-09	0.269183	0.0317586	LIHC
cg04675919	-0.236829	-11.9416	2.96471e-15	1.07882e-09	0.283185	0.0550239	LIHC
cg04691867	-0.237472	-9.73485	1.90806e-12	6.94317e-07	0.269027	0.0462413	LIHC
cg04702045	-0.186056	-10.7334	9.46141e-14	3.44287e-08	0.207657	0.0264625	LIHC
cg04712194	-0.33292	-12.5542	5.50299e-16	2.00246e-10	0.388553	0.0580154	LIHC
cg04716051	-0.292976	-11.3716	1.48357e-14	5.39851e-09	0.319329	0.0302729	LIHC
cg04734394	-0.310947	-18.444	4.62374e-22	1.68251e-16	0.360143	0.0420544	LIHC
cg04739874	-0.261278	-13.8019	2.05932e-17	7.49358e-12	0.285004	0.0273194	LIHC
cg04744025	-0.156725	-10.3154	3.27574e-13	1.192e-07	0.191089	0.0387355	LIHC
cg04855977	-0.111678	-11.4916	1.0534e-14	3.83317e-09	0.17637	0.0661955	LIHC
cg04856605	-0.231005	-12.0411	2.24782e-15	8.1795e-10	0.285642	0.0686734	LIHC
cg04924736	-0.237034	-9.07777	1.47439e-11	5.3651e-06	0.290627	0.0489403	LIHC
cg05032098	-0.0988907	-6.54934	5.76426e-08	0.0209753	0.269222	0.161052	LIHC
cg05032903	-0.307376	-6.51381	6.49337e-08	0.0236285	0.433036	0.141133	LIHC
cg05045028	-0.151248	-12.1632	1.60316e-15	5.83368e-10	0.175019	0.0304039	LIHC
cg05049545	-0.347835	-11.1597	2.7287e-14	9.92935e-09	0.367119	0.0347616	LIHC
cg05086798	-0.251092	-7.67481	1.36229e-09	0.000495716	0.396323	0.115869	LIHC
cg05091873	-0.295721	-16.9559	1.12702e-20	4.10108e-15	0.329966	0.0362184	LIHC
cg05096434	-0.218704	-12.7416	3.31876e-16	1.20765e-10	0.246133	0.0280398	LIHC
cg05100261	-0.25183	-12.3594	9.35261e-16	3.40328e-10	0.274054	0.0204247	LIHC
cg05104476	-0.121128	-8.12063	3.16562e-10	0.000115192	0.18998	0.0691442	LIHC
cg05109619	-0.301664	-17.4479	3.8325e-21	1.39459e-15	0.334286	0.0326987	LIHC
cg05184682	-0.275007	-9.94273	1.01029e-12	3.6763e-07	0.301163	0.0350441	LIHC
cg05200254	-0.252215	-10.7918	7.96672e-14	2.89898e-08	0.287529	0.0463556	LIHC
cg05222959	-0.202649	-9.63651	2.58249e-12	9.39733e-07	0.238803	0.0429202	LIHC
cg05223760	-0.295411	-14.6455	2.48199e-18	9.0316e-13	0.332488	0.0424776	LIHC
cg05242815	-0.254089	-7.59153	1.79254e-09	0.000652281	0.323431	0.0814207	LIHC
cg05288927	-0.205527	-7.51993	2.27056e-09	0.000826226	0.271928	0.0507245	LIHC
cg05370638	-0.313559	-14.1663	8.17228e-18	2.97378e-12	0.332071	0.0228676	LIHC
cg05374090	-0.42216	-36.442	5.32954e-34	1.93935e-28	0.448825	0.0287931	LIHC
cg05379196	-0.193935	-6.95759	1.47084e-08	0.00535216	0.229928	0.0416624	LIHC
cg05397816	-0.342934	-15.9574	1.083e-19	3.94087e-14	0.376581	0.0450348	LIHC
cg05424879	-0.370079	-20.5249	7.33871e-24	2.67046e-18	0.39498	0.0316173	LIHC
cg05438092	-0.323688	-14.632	2.56584e-18	9.33674e-13	0.378348	0.0475647	LIHC
cg05442715	-0.207241	-8.89075	2.66338e-11	9.69168e-06	0.226787	0.0239544	LIHC
cg05461361	-0.361834	-16.2182	5.93857e-20	2.16096e-14	0.380376	0.0196868	LIHC
cg05476089	-0.343699	-14.9433	1.19913e-18	4.36348e-13	0.403817	0.0597368	LIHC
cg05526804	-0.181444	-14.0063	1.22381e-17	4.45328e-12	0.204023	0.0239283	LIHC
cg05533223	0.314874	16.2083	6.07538e-20	2.21075e-14	0.603834	0.907244	LIHC
cg05551025	-0.130945	-6.50272	6.73934e-08	0.0245235	0.171873	0.0416097	LIHC
cg05605384	-0.205421	-7.96682	5.22698e-10	0.000190202	0.226972	0.0273572	LIHC
cg05630320	-0.206303	-8.01628	4.4475e-10	0.000161838	0.225063	0.025356	LIHC
cg05704524	-0.287163	-19.4371	6.12369e-23	2.22832e-17	0.339123	0.0501407	LIHC
cg05782106	-0.217188	-7.11757	8.62782e-09	0.00313954	0.237615	0.0281724	LIHC
cg05785344	-0.323931	-20.6898	5.36331e-24	1.95163e-18	0.354893	0.0370547	LIHC
cg05799859	-0.356835	-14.8963	1.34402e-18	4.89071e-13	0.393656	0.0405823	LIHC
cg05803370	-0.342407	-15.2349	5.93778e-19	2.16067e-13	0.370182	0.0209636	LIHC
cg05803913	-0.395468	-14.5703	2.98701e-18	1.08693e-12	0.404211	0.023973	LIHC
cg05806018	-0.442409	-12.0642	2.10818e-15	7.67137e-10	0.475553	0.0785458	LIHC
cg05835545	-0.211907	-9.57041	3.16732e-12	1.15254e-06	0.239601	0.0314433	LIHC
cg05872222	-0.220483	-9.75553	1.79065e-12	6.51592e-07	0.24656	0.043308	LIHC
cg05899999	-0.263704	-13.2966	7.61452e-17	2.77082e-11	0.291168	0.026444	LIHC
cg05905814	-0.264862	-11.7845	4.60126e-15	1.67433e-09	0.294696	0.0319942	LIHC
cg05908188	-0.299099	-17.1081	8.05222e-21	2.93009e-15	0.325832	0.0269201	LIHC
cg05935584	-0.39249	-17.2622	5.7427e-21	2.08969e-15	0.409984	0.0218221	LIHC
cg05941375	-0.271975	-18.4398	4.66353e-22	1.69699e-16	0.456791	0.184488	LIHC
cg05950094	-0.149586	-7.22039	6.12824e-09	0.00222998	0.232367	0.0696419	LIHC
cg05958126	-0.37131	-8.28946	1.83024e-10	6.65999e-05	0.473534	0.148224	LIHC
cg05994819	-0.284298	-13.8394	1.87095e-17	6.80812e-12	0.314429	0.0258191	LIHC
cg05996419	-0.32303	-18.277	6.5502e-22	2.38353e-16	0.347962	0.0277862	LIHC
cg06039729	-0.21983	-8.16333	2.75522e-10	0.000100259	0.237876	0.035549	LIHC
cg06041068	-0.392549	-17.4324	3.96303e-21	1.44209e-15	0.423782	0.0317908	LIHC
cg06042004	-0.431975	-13.5053	4.41988e-17	1.60833e-11	0.490975	0.0552865	LIHC
cg06051391	-0.303529	-16.2659	5.32479e-20	1.93762e-14	0.324926	0.0228766	LIHC
cg06055478	-0.31581	-18.8691	1.9261e-22	7.00879e-17	0.363229	0.047133	LIHC
cg06072560	-0.221603	-14.3461	5.20936e-18	1.89561e-12	0.243121	0.0254865	LIHC
cg06079963	-0.284631	-14.3333	5.37841e-18	1.95713e-12	0.312078	0.0305581	LIHC
cg06093412	-0.223397	-10.9255	5.38673e-14	1.96015e-08	0.241433	0.0212487	LIHC
cg06097615	-0.264113	-13.4011	5.79507e-17	2.10874e-11	0.284208	0.029578	LIHC
cg06098232	-0.204804	-15.3342	4.68345e-19	1.70424e-13	0.218484	0.0178729	LIHC
cg06104510	-0.183159	-9.00254	1.86945e-11	6.80266e-06	0.216777	0.0367717	LIHC
cg06104959	-0.207147	-10.7181	9.8964e-14	3.60116e-08	0.253179	0.0362823	LIHC
cg06124711	-0.299557	-15.7892	1.60149e-19	5.8276e-14	0.323379	0.0221917	LIHC
cg06135529	-0.162242	-9.68793	2.20417e-12	8.02067e-07	0.211455	0.0457241	LIHC
cg06136002	-0.393451	-15.5512	2.79971e-19	1.01877e-13	0.413549	0.0245071	LIHC
cg06139288	-0.247026	-7.21371	6.26586e-09	0.00228006	0.390059	0.122951	LIHC
cg06144999	-0.274841	-14.7114	2.11108e-18	7.68194e-13	0.307038	0.0410831	LIHC
cg06158088	-0.352377	-29.2735	4.6434e-30	1.68967e-24	0.382461	0.038808	LIHC
cg06172626	-0.276845	-15.4688	3.40199e-19	1.23794e-13	0.37784	0.10462	LIHC
cg06174815	-0.211985	-7.19337	6.70426e-09	0.00243959	0.292782	0.102057	LIHC
cg06185870	-0.342707	-17.9539	1.29398e-21	4.70862e-16	0.389648	0.0565229	LIHC
cg06206449	-0.21562	-9.56288	3.24193e-12	1.17969e-06	0.285975	0.0690313	LIHC
cg06252876	-0.114157	-9.86858	1.2667e-12	4.60934e-07	0.133522	0.0224087	LIHC
cg06266461	-0.391809	-26.1574	4.59299e-28	1.67132e-22	0.414266	0.0250053	LIHC
cg06272245	-0.154202	-6.9207	1.66363e-08	0.0060537	0.2864	0.1418	LIHC
cg06295352	-0.247091	-7.65756	1.4419e-09	0.000524688	0.266899	0.0287511	LIHC
cg06297686	-0.363536	-21.8363	6.40559e-25	2.33091e-19	0.36914	0.0173824	LIHC
cg06376033	-0.116347	-8.23146	2.2086e-10	8.03678e-05	0.27528	0.160978	LIHC
cg06408301	-0.312162	-11.4309	1.25238e-14	4.55723e-09	0.35189	0.0361908	LIHC
cg06411441	-0.126167	-10.9357	5.22795e-14	1.90238e-08	0.140801	0.0208323	LIHC
cg06443675	-0.150064	-12.382	8.79169e-16	3.19917e-10	0.19976	0.0468068	LIHC
cg06464066	-0.187387	-10.9997	4.33872e-14	1.5788e-08	0.216796	0.0277231	LIHC
cg06510592	-0.371852	-17.0329	9.50508e-21	3.45876e-15	0.445759	0.0736476	LIHC
cg06511189	-0.189529	-9.36864	5.92534e-12	2.15615e-06	0.203114	0.0215812	LIHC
cg06521531	-0.357613	-13.3059	7.43021e-17	2.70375e-11	0.467274	0.119645	LIHC
cg06535161	-0.302009	-7.66734	1.39621e-09	0.00050806	0.340736	0.0845037	LIHC
cg06540859	-0.367219	-8.5144	8.85941e-11	3.22381e-05	0.53798	0.138725	LIHC
cg06551391	-0.199408	-10.7696	8.5043e-14	3.0946e-08	0.227313	0.0229819	LIHC
cg06615444	-0.383056	-9.10859	1.33802e-11	4.86886e-06	0.47111	0.133509	LIHC
cg06616857	-0.408874	-39.197	2.52745e-35	9.19705e-30	0.4366	0.0308098	LIHC
cg06624970	-0.313497	-11.6093	7.54141e-15	2.74421e-09	0.364734	0.0547113	LIHC
cg06700462	-0.242411	-14.6284	2.58879e-18	9.42023e-13	0.314984	0.0718846	LIHC
cg06705078	-0.294382	-11.2576	2.05755e-14	7.48714e-09	0.312001	0.0160448	LIHC
cg06721573	-0.30478	-13.4897	4.6034e-17	1.67511e-11	0.314243	0.0211551	LIHC
cg06779802	-0.372528	-7.10037	9.13645e-09	0.00332462	0.589716	0.258302	LIHC
cg06796204	-0.264805	-7.602	1.73169e-09	0.000630137	0.366933	0.117746	LIHC
cg06803079	-0.147492	-12.6576	4.16105e-16	1.51415e-10	0.253466	0.10957	LIHC
cg06805513	-0.226425	-7.68065	1.33631e-09	0.000486265	0.266747	0.0366052	LIHC
cg06807018	-0.258927	-13.0506	1.45526e-16	5.29549e-11	0.373091	0.110261	LIHC
cg06834235	-0.370603	-24.4322	7.23435e-27	2.63248e-21	0.39056	0.0202676	LIHC
cg06899582	-0.163307	-10.3874	2.64031e-13	9.60772e-08	0.192935	0.0308736	LIHC
cg06945800	-0.378744	-24.2108	1.04317e-26	3.79595e-21	0.406207	0.02403	LIHC
cg07038409	-0.325497	-21.9246	5.45939e-25	1.9866e-19	0.404529	0.0801632	LIHC
cg07051162	-0.228136	-6.32985	1.20332e-07	0.0437872	0.260491	0.0343211	LIHC
cg07056506	-0.280976	-14.314	5.64487e-18	2.05409e-12	0.315598	0.0492829	LIHC
cg07086565	-0.227927	-10.0775	6.70884e-13	2.44125e-07	0.254807	0.0213415	LIHC
cg07089242	-0.282092	-10.5417	1.66742e-13	6.0675e-08	0.299254	0.0309345	LIHC
cg07109010	-0.151486	-13.1694	1.06345e-16	3.86975e-11	0.178959	0.0268315	LIHC
cg07136872	-0.18882	-7.04811	1.08747e-08	0.00395715	0.211034	0.0447739	LIHC
cg07187289	-0.359335	-14.096	9.75566e-18	3.54995e-12	0.384827	0.0263919	LIHC
cg07200487	-0.184065	-6.7985	2.50283e-08	0.00910745	0.214499	0.0281891	LIHC
cg07215528	-0.241055	-11.6889	6.02191e-15	2.19129e-09	0.28456	0.0354799	LIHC
cg07261646	-0.398235	-16.4855	3.23186e-20	1.17603e-14	0.444549	0.0372736	LIHC
cg07312966	-0.197629	-7.45108	2.85108e-09	0.00103747	0.246414	0.0532831	LIHC
cg07363416	-0.191233	-10.3267	3.16655e-13	1.15226e-07	0.300857	0.115296	LIHC
cg07381502	-0.235417	-9.25075	8.56338e-12	3.1161e-06	0.254585	0.0273814	LIHC
cg07386410	-0.207916	-13.9963	1.25544e-17	4.56836e-12	0.241403	0.0262006	LIHC
cg07393670	-0.289431	-18.5847	3.45427e-22	1.25696e-16	0.327837	0.0457248	LIHC
cg07416427	0.228364	6.31705	1.25611e-07	0.045708	0.700702	0.906648	LIHC
cg07419801	-0.388122	-24.8196	3.83936e-27	1.39709e-21	0.405669	0.0189627	LIHC
cg07446674	-0.47329	-9.86621	1.27592e-12	4.64289e-07	0.544101	0.0691922	LIHC
cg07464598	-0.214795	-14.2859	6.05523e-18	2.20341e-12	0.231335	0.0239228	LIHC
cg07516457	-0.284353	-17.3971	4.27935e-21	1.5572e-15	0.295731	0.0173271	LIHC
cg07519908	-0.12128	-6.66218	3.94977e-08	0.0143726	0.162306	0.0455896	LIHC
cg07647518	-0.146342	-6.59554	4.93749e-08	0.0179668	0.238344	0.0960831	LIHC
cg07648454	-0.330036	-8.6894	5.05652e-11	1.84e-05	0.376113	0.0700264	LIHC
cg07659240	-0.287202	-15.1525	7.2361e-19	2.63312e-13	0.318369	0.0291109	LIHC
cg07674075	-0.346958	-16.8315	1.48609e-20	5.40769e-15	0.395022	0.051769	LIHC
cg07674503	-0.414784	-25.5588	1.17335e-27	4.26967e-22	0.431177	0.0188894	LIHC
cg07681512	-0.222058	-8.56002	7.65188e-11	2.78441e-05	0.257235	0.057271	LIHC
cg07682072	-0.276892	-15.2968	5.12065e-19	1.86333e-13	0.334531	0.0678423	LIHC
cg07686944	-0.267687	-9.17535	1.08472e-11	3.94714e-06	0.281209	0.0209494	LIHC
cg07693301	-0.198721	-10.1106	6.06911e-13	2.20846e-07	0.237295	0.0315049	LIHC
cg07779434	-0.187779	-12.3235	1.03168e-15	3.75413e-10	0.219156	0.0373561	LIHC
cg07781082	-0.288612	-15.0023	1.03932e-18	3.78194e-13	0.299243	0.0195406	LIHC
cg07806343	-0.307408	-14.0846	1.00404e-17	3.65355e-12	0.342352	0.0420512	LIHC
cg07823797	-0.237432	-13.8647	1.75427e-17	6.38355e-12	0.256257	0.0174947	LIHC
cg07825508	-0.223661	-8.77593	3.83666e-11	1.39611e-05	0.258673	0.039379	LIHC
cg07834773	-0.157015	-7.51119	2.33711e-09	0.000850442	0.247979	0.0982384	LIHC
cg07837161	-0.403146	-18.4185	4.87546e-22	1.77411e-16	0.444562	0.0430636	LIHC
cg07858069	-0.203133	-9.26048	8.3066e-12	3.02266e-06	0.230696	0.0419603	LIHC
cg07861180	-0.44843	-12.3891	8.62378e-16	3.13807e-10	0.502595	0.0842534	LIHC
cg07865580	-0.237759	-11.0627	3.61346e-14	1.31489e-08	0.279209	0.0380075	LIHC
cg07867687	-0.321046	-26.1015	5.00977e-28	1.82298e-22	0.329161	0.0148009	LIHC
cg07874334	-0.336934	-16.5957	2.52006e-20	9.17016e-15	0.345594	0.0211604	LIHC
cg07896193	-0.216137	-15.5108	3.08014e-19	1.12082e-13	0.262365	0.0491791	LIHC
cg07902213	-0.147227	-8.29305	1.80908e-10	6.58298e-05	0.1593	0.0239949	LIHC
cg07912337	-0.398394	-19.0499	1.33347e-22	4.85232e-17	0.430581	0.0328484	LIHC
cg07930217	-0.178823	-11.254	2.07881e-14	7.5645e-09	0.200375	0.024241	LIHC
cg07951153	-0.351842	-14.365	4.97057e-18	1.80872e-12	0.378361	0.0292453	LIHC
cg07973464	-0.240763	-11.339	1.62876e-14	5.92683e-09	0.283135	0.0531586	LIHC
cg07990395	-0.294555	-6.3596	1.08903e-07	0.0396285	0.389581	0.0981654	LIHC
cg08063601	-0.150311	-6.82909	2.2594e-08	0.00822165	0.239706	0.0676687	LIHC
cg08108619	-0.216405	-6.70167	3.46051e-08	0.0125923	0.298449	0.110079	LIHC
cg08199506	-0.254199	-12.1013	1.90241e-15	6.9226e-10	0.289903	0.0461156	LIHC
cg08202860	-0.317753	-6.86321	2.01588e-08	0.00733549	0.454504	0.156629	LIHC
cg08209483	-0.144745	-14.0139	1.20058e-17	4.36873e-12	0.180626	0.0379265	LIHC
cg08282969	-0.41223	-29.658	2.71679e-30	9.88603e-25	0.506684	0.0970772	LIHC
cg08298085	-0.334563	-19.7421	3.34615e-23	1.21762e-17	0.40103	0.0650695	LIHC
cg08358587	-0.300965	-14.9756	1.10863e-18	4.03414e-13	0.327014	0.0270069	LIHC
cg08405463	-0.382421	-19.9525	2.21483e-23	8.05946e-18	0.433841	0.0565756	LIHC
cg08408091	-0.354978	-13.766	2.25777e-17	8.2157e-12	0.385231	0.0276856	LIHC
cg08422514	-0.160508	-7.67259	1.37227e-09	0.00049935	0.210884	0.0486594	LIHC
cg08437461	-0.160331	-10.5221	1.76764e-13	6.4322e-08	0.215059	0.0553589	LIHC
cg08437835	-0.233125	-10.4222	2.3801e-13	8.66086e-08	0.250848	0.0327516	LIHC
cg08446187	-0.349692	-15.8389	1.42621e-19	5.18976e-14	0.366764	0.0250254	LIHC
cg08447449	-0.17127	-7.97553	5.08033e-10	0.000184866	0.194711	0.0179839	LIHC
cg08470157	-0.22774	-6.6241	4.48709e-08	0.0163279	0.273436	0.0452755	LIHC
cg08479532	-0.3338	-18.2994	6.25044e-22	2.27445e-16	0.375898	0.049996	LIHC
cg08479711	-0.150273	-7.55118	2.04785e-09	0.000745183	0.300225	0.146606	LIHC
cg08617833	-0.297607	-8.0988	3.39866e-10	0.000123673	0.469867	0.138294	LIHC
cg08623691	-0.228482	-13.818	1.9765e-17	7.19221e-12	0.286146	0.0596689	LIHC
cg08626646	-0.257794	-11.2671	2.00217e-14	7.28561e-09	0.322448	0.0653839	LIHC
cg08627233	-0.279972	-15.0137	1.01102e-18	3.67897e-13	0.302814	0.0185248	LIHC
cg08637771	-0.303414	-13.3674	6.32751e-17	2.30249e-11	0.354085	0.0536979	LIHC
cg08648877	-0.308629	-20.4348	8.71788e-24	3.17231e-18	0.33304	0.0232997	LIHC
cg08703114	-0.316261	-23.1096	6.73168e-26	2.44956e-20	0.38117	0.0544976	LIHC
cg08783090	-0.282597	-8.44582	1.10467e-10	4.01973e-05	0.365775	0.103694	LIHC
cg08784874	-0.3086	-15.8197	1.49154e-19	5.42751e-14	0.326196	0.0188434	LIHC
cg08817443	-0.142644	-7.57245	1.90903e-09	0.000694668	0.347794	0.199322	LIHC
cg08881528	-0.256164	-10.1931	4.73215e-13	1.72196e-07	0.276486	0.0388823	LIHC
cg08905118	-0.128163	-10.2965	3.46655e-13	1.26143e-07	0.145252	0.0200388	LIHC
cg08950703	-0.288033	-6.52511	6.25205e-08	0.0227503	0.394743	0.182783	LIHC
cg08952424	-0.309622	-13.6596	2.96694e-17	1.07963e-11	0.349316	0.0387594	LIHC
cg08955276	-0.254213	-13.0058	1.63879e-16	5.96332e-11	0.305624	0.0549548	LIHC
cg08964402	-0.24171	-9.54896	3.38459e-12	1.23161e-06	0.279261	0.035027	LIHC
cg08966380	-0.318527	-7.58245	1.84702e-09	0.000672106	0.390169	0.100803	LIHC
cg08969352	-0.345677	-23.2093	5.66821e-26	2.06258e-20	0.398632	0.0519252	LIHC
cg08980509	-0.323799	-9.27421	7.95738e-12	2.89558e-06	0.369697	0.0862459	LIHC
cg08998989	-0.151886	-7.06887	1.01475e-08	0.00369252	0.176749	0.0382884	LIHC
cg09018810	-0.228448	-13.4477	5.13347e-17	1.868e-11	0.253162	0.0249174	LIHC
cg09034929	-0.0914575	-10.24	4.10816e-13	1.4949e-07	0.116716	0.0316297	LIHC
cg09056691	-0.237745	-14.9486	1.1837e-18	4.30733e-13	0.261568	0.0215931	LIHC
cg09060772	-0.266168	-13.4147	5.59364e-17	2.03545e-11	0.303137	0.0415236	LIHC
cg09061583	-0.176142	-10.8226	7.27972e-14	2.64899e-08	0.2143	0.0315281	LIHC
cg09070199	-0.241627	-8.52828	8.47295e-11	3.08319e-05	0.27267	0.0437724	LIHC
cg09072865	-0.329455	-16.515	3.02303e-20	1.10004e-14	0.372264	0.0447888	LIHC
cg09080960	-0.23968	-10.7824	8.19003e-14	2.98024e-08	0.355759	0.113384	LIHC
cg09091181	-0.311511	-6.3401	1.16265e-07	0.0423072	0.369138	0.105715	LIHC
cg09158774	-0.239801	-8.76868	3.92637e-11	1.42875e-05	0.32629	0.073636	LIHC
cg09185350	-0.177065	-12.2456	1.27781e-15	4.64977e-10	0.20255	0.0230345	LIHC
cg09192059	-0.179803	-7.19693	6.6253e-09	0.00241085	0.238766	0.0563093	LIHC
cg09207137	-0.340474	-15.3982	4.02232e-19	1.46366e-13	0.387603	0.0520135	LIHC
cg09210933	-0.260158	-9.72728	1.95293e-12	7.10644e-07	0.31124	0.058453	LIHC
cg09307104	-0.307652	-11.1087	3.16211e-14	1.15065e-08	0.386649	0.0804805	LIHC
cg09309899	-0.258866	-16.7539	1.7671e-20	6.43024e-15	0.274783	0.020849	LIHC
cg09310980	-0.304329	-8.00671	4.58864e-10	0.000166974	0.443105	0.152767	LIHC
cg09329826	-0.290814	-6.90257	1.76746e-08	0.00643155	0.405169	0.113196	LIHC
cg09342610	-0.311401	-9.60655	2.83264e-12	1.03076e-06	0.346615	0.0381462	LIHC
cg09368074	-0.223302	-9.19377	1.02377e-11	3.72536e-06	0.24873	0.0395059	LIHC
cg09411587	-0.318794	-21.1684	2.18349e-24	7.94542e-19	0.393383	0.0744579	LIHC
cg09418475	-0.396113	-17.451	3.80656e-21	1.38516e-15	0.426007	0.0361336	LIHC
cg09514431	-0.402735	-17.7941	1.81877e-21	6.61824e-16	0.426948	0.0341161	LIHC
cg09523186	-0.320829	-12.4732	6.85737e-16	2.4953e-10	0.363588	0.0550972	LIHC
cg09525227	-0.221211	-7.26133	5.34866e-09	0.0019463	0.335337	0.116642	LIHC
cg09597400	-0.328539	-11.3218	1.711e-14	6.2261e-09	0.388077	0.0567833	LIHC
cg09610589	-0.168283	-11.8239	4.12039e-15	1.49935e-09	0.187198	0.0234427	LIHC
cg09656426	-0.124222	-6.8599	2.03834e-08	0.00741724	0.169872	0.0462881	LIHC
cg09666011	-0.318592	-16.1386	7.12852e-20	2.59397e-14	0.334995	0.0254473	LIHC
cg09720515	-0.315962	-22.2118	3.25946e-25	1.18607e-19	0.336922	0.0277762	LIHC
cg09738386	-0.235558	-9.90612	1.12954e-12	4.11023e-07	0.277868	0.0408123	LIHC
cg09743287	-0.0994359	-6.87745	1.92221e-08	0.00699465	0.128147	0.0239636	LIHC
cg09786233	-0.192816	-9.18924	1.03843e-11	3.7787e-06	0.236809	0.0392901	LIHC
cg09790289	-0.295104	-17.2905	5.3979e-21	1.96422e-15	0.313523	0.0210998	LIHC
cg09799350	-0.280304	-13.2978	7.59055e-17	2.76209e-11	0.305721	0.0247763	LIHC
cg09850561	-0.308111	-16.1013	7.76653e-20	2.82613e-14	0.335883	0.0380469	LIHC
cg09863225	-0.0974182	-8.04008	4.11521e-10	0.000149747	0.212356	0.116129	LIHC
cg09868337	-0.294439	-14.0891	9.92688e-18	3.61225e-12	0.318977	0.0384158	LIHC
cg09965404	-0.325033	-13.0363	1.51167e-16	5.50075e-11	0.344219	0.0245263	LIHC
cg09985072	-0.311034	-18.7846	2.28937e-22	8.3307e-17	0.448554	0.148867	LIHC
cg09990582	-0.184463	-8.38268	1.35409e-10	4.92734e-05	0.207763	0.0288399	LIHC
cg09996779	-0.269373	-11.7038	5.77488e-15	2.1014e-09	0.301924	0.0430086	LIHC
cg09998474	-0.155185	-6.86493	2.00434e-08	0.00729352	0.185925	0.0297757	LIHC
cg10055097	-0.382684	-21.3653	1.5161e-24	5.51688e-19	0.4062	0.0327481	LIHC
cg10070668	-0.274753	-12.1714	1.56743e-15	5.70365e-10	0.297073	0.0242672	LIHC
cg10088372	-0.284224	-20.5744	6.67682e-24	2.4296e-18	0.298333	0.0180494	LIHC
cg10191387	-0.201996	-7.18896	6.80333e-09	0.00247564	0.265805	0.049514	LIHC
cg10201390	-0.359083	-22.1376	3.72206e-25	1.35441e-19	0.380137	0.0242196	LIHC
cg10207070	-0.137124	-12.8974	2.18688e-16	7.95774e-11	0.177095	0.0368352	LIHC
cg10274815	-0.375793	-12.9374	1.96566e-16	7.15276e-11	0.452755	0.0881012	LIHC
cg10286673	-0.31646	-14.2694	6.31039e-18	2.29626e-12	0.338924	0.028303	LIHC
cg10305945	-0.281615	-16.3521	4.37406e-20	1.59166e-14	0.313387	0.0340698	LIHC
cg10315562	-0.369466	-28.8595	8.33006e-30	3.03119e-24	0.397906	0.0262099	LIHC
cg10347293	-0.29088	-12.871	2.34651e-16	8.53862e-11	0.311202	0.026144	LIHC
cg10575236	-0.190797	-9.81132	1.50914e-12	5.49153e-07	0.208714	0.0242076	LIHC
cg10645578	-0.305348	-16.1211	7.42175e-20	2.70067e-14	0.348747	0.0414343	LIHC
cg10655551	-0.215664	-6.64598	4.16988e-08	0.0151736	0.248757	0.0496993	LIHC
cg10717149	-0.386806	-20.8404	4.0344e-24	1.46806e-18	0.41719	0.0304027	LIHC
cg10721440	-0.35736	-7.29807	4.7343e-09	0.00172275	0.40271	0.0991377	LIHC
cg10848980	-0.158394	-10.7235	9.74163e-14	3.54484e-08	0.202355	0.0427304	LIHC
cg10860619	-0.458037	-45.5537	4.53667e-38	1.65083e-32	0.469641	0.0193287	LIHC
cg10861555	-0.280412	-12.2932	1.12121e-15	4.07992e-10	0.445872	0.163886	LIHC
cg10869159	-0.211104	-9.77097	1.7078e-12	6.21445e-07	0.252688	0.0515338	LIHC
cg10912974	-0.311541	-14.5812	2.90787e-18	1.05813e-12	0.345444	0.0328603	LIHC
cg10914789	-0.254097	-8.14998	2.87739e-10	0.000104704	0.382115	0.127692	LIHC
cg10950413	-0.312316	-18.9467	1.64434e-22	5.98352e-17	0.329841	0.0262857	LIHC
cg10956264	-0.242316	-11.8426	3.9094e-15	1.42258e-09	0.273698	0.0386485	LIHC
cg10978884	-0.303797	-12.4776	6.77501e-16	2.46533e-10	0.329906	0.0247771	LIHC
cg10983111	-0.304456	-18.444	4.62334e-22	1.68237e-16	0.31826	0.0194256	LIHC
cg10987536	-0.4236	-35.2028	2.25539e-33	8.20704e-28	0.484471	0.0674641	LIHC
cg10991108	-0.375879	-15.9906	1.00283e-19	3.64917e-14	0.434534	0.0646096	LIHC
cg11081925	-0.154152	-7.07408	9.97304e-09	0.00362905	0.304873	0.155758	LIHC
cg11082424	-0.328959	-11.1062	3.18534e-14	1.1591e-08	0.407229	0.0992887	LIHC
cg11111131	-0.249796	-11.3751	1.46859e-14	5.344e-09	0.267111	0.020903	LIHC
cg11111271	-0.311932	-15.3418	4.59971e-19	1.67377e-13	0.355562	0.0377258	LIHC
cg11143827	0.280742	12.6514	4.23109e-16	1.53964e-10	0.711267	0.963263	LIHC
cg11152253	-0.468935	-34.8974	3.24161e-33	1.17958e-27	0.49881	0.0363852	LIHC
cg11154719	-0.320691	-16.3247	4.65639e-20	1.69439e-14	0.332416	0.0194173	LIHC
cg11184697	-0.391354	-19.2717	8.52579e-23	3.10242e-17	0.398774	0.0192081	LIHC
cg11184796	-0.0776575	-6.40367	9.3942e-08	0.0341842	0.117626	0.0392459	LIHC
cg11185978	-0.375781	-17.8135	1.74479e-21	6.34905e-16	0.412886	0.0320646	LIHC
cg11186637	-0.2712	-13.9785	1.3134e-17	4.77926e-12	0.289986	0.0265653	LIHC
cg11186981	-0.361994	-21.0373	2.78787e-24	1.01447e-18	0.380202	0.0303116	LIHC
cg11190082	-0.294387	-14.1233	9.10655e-18	3.31375e-12	0.316372	0.0250968	LIHC
cg11193681	-0.101695	-8.3558	1.47685e-10	5.37404e-05	0.25321	0.153387	LIHC
cg11233153	-0.363607	-17.1571	7.23017e-21	2.63096e-15	0.387133	0.0226125	LIHC
cg11271681	-0.292266	-12.171	1.56933e-15	5.71056e-10	0.325097	0.0371634	LIHC
cg11281291	-0.241569	-12.0669	2.09254e-15	7.61447e-10	0.273226	0.0308929	LIHC
cg11281673	-0.129797	-9.34143	6.45018e-12	2.34713e-06	0.161905	0.0282645	LIHC
cg11286196	-0.272357	-14.6601	2.39426e-18	8.71236e-13	0.31172	0.0394786	LIHC
cg11308037	-0.360155	-17.5627	2.98951e-21	1.08784e-15	0.392313	0.0293093	LIHC
cg11337025	-0.185631	-9.67592	2.28719e-12	8.32276e-07	0.266536	0.078626	LIHC
cg11344644	-0.276303	-9.97184	9.24622e-13	3.36457e-07	0.30035	0.0255258	LIHC
cg11506821	-0.215433	-12.383	8.76751e-16	3.19038e-10	0.266562	0.0505168	LIHC
cg11509903	-0.221235	-8.8021	3.52995e-11	1.2845e-05	0.249706	0.0328147	LIHC
cg11520843	-0.284215	-17.9263	1.37226e-21	4.99346e-16	0.306534	0.0201575	LIHC
cg11616438	-0.211843	-7.56806	1.93687e-09	0.000704801	0.240442	0.0292829	LIHC
cg11637006	-0.329342	-13.1491	1.12174e-16	4.08186e-11	0.352596	0.0327981	LIHC
cg11653314	-0.355487	-16.4603	3.42126e-20	1.24495e-14	0.462552	0.107636	LIHC
cg11653864	-0.27229	-16.1427	7.06249e-20	2.56994e-14	0.300385	0.0267281	LIHC
cg11663393	-0.247545	-10.1628	5.18407e-13	1.88641e-07	0.259743	0.0199012	LIHC
cg11673471	-0.485579	-21.9285	5.42138e-25	1.97276e-19	0.524219	0.0454857	LIHC
cg11704979	-0.269445	-13.1593	1.09221e-16	3.9744e-11	0.303894	0.0369649	LIHC
cg11778030	-0.181171	-9.25798	8.37172e-12	3.04635e-06	0.218845	0.0279805	LIHC
cg11825731	-0.117187	-11.9869	2.61348e-15	9.51007e-10	0.146974	0.0262483	LIHC
cg11839979	-0.264035	-12.9512	1.895e-16	6.89566e-11	0.295323	0.0378734	LIHC
cg11851349	-0.272521	-10.2211	4.3482e-13	1.58225e-07	0.325847	0.0449387	LIHC
cg11863519	-0.106577	-7.20585	6.43172e-09	0.00234041	0.129779	0.0223704	LIHC
cg11902811	-0.26939	-15.0159	1.0057e-18	3.65958e-13	0.279043	0.0265382	LIHC
cg12026625	-0.243714	-11.6515	6.69353e-15	2.43568e-09	0.254533	0.0266866	LIHC
cg12039967	-0.287789	-13.4567	5.01474e-17	1.82479e-11	0.342895	0.0650318	LIHC
cg12058262	-0.308833	-11.9973	2.539e-15	9.23906e-10	0.340139	0.033963	LIHC
cg12058840	-0.235376	-11.9187	3.16025e-15	1.14997e-09	0.324482	0.0902914	LIHC
cg12064531	-0.306302	-18.7367	2.52592e-22	9.19148e-17	0.354488	0.0438611	LIHC
cg12075609	-0.398579	-7.53498	2.16042e-09	0.000786147	0.537928	0.18456	LIHC
cg12128683	-0.196653	-6.70667	3.4031e-08	0.0123834	0.203525	0.0227366	LIHC
cg12137402	-0.310085	-15.7031	1.95857e-19	7.12696e-14	0.328454	0.0333171	LIHC
cg12145026	-0.298066	-11.5976	7.79591e-15	2.83682e-09	0.331979	0.0367643	LIHC
cg12165354	-0.194091	-11.4681	1.12611e-14	4.09774e-09	0.210149	0.0211208	LIHC
cg12166502	-0.339221	-21.4196	1.37156e-24	4.99092e-19	0.365552	0.0226333	LIHC
cg12175122	-0.0789592	-7.24436	5.65888e-09	0.00205919	0.119476	0.0444678	LIHC
cg12228772	-0.136626	-8.33743	1.56715e-10	5.70264e-05	0.174226	0.0334305	LIHC
cg12263679	-0.217187	-13.3252	7.06435e-17	2.57062e-11	0.245042	0.0331662	LIHC
cg12284142	-0.361841	-15.8672	1.33507e-19	4.85814e-14	0.376956	0.0271412	LIHC
cg12298823	-0.383968	-27.0155	1.23681e-28	4.50059e-23	0.391687	0.0220181	LIHC
cg12375308	-0.25474	-13.011	1.61662e-16	5.88264e-11	0.264965	0.0219786	LIHC
cg12413138	-0.40742	-18.4301	4.75913e-22	1.73178e-16	0.429927	0.0252525	LIHC
cg12419462	-0.276354	-7.66373	1.41289e-09	0.000514131	0.321812	0.0834752	LIHC
cg12447182	-0.336581	-13.6233	3.2581e-17	1.18558e-11	0.354192	0.0260858	LIHC
cg12472218	-0.401259	-29.5441	3.18233e-30	1.158e-24	0.445077	0.0459968	LIHC
cg12481479	-0.267314	-13.4867	4.63878e-17	1.68799e-11	0.301774	0.0345058	LIHC
cg12501871	-0.29185	-11.0925	3.31373e-14	1.20582e-08	0.339686	0.0520757	LIHC
cg12521790	-0.337733	-20.6162	6.16703e-24	2.2441e-18	0.359688	0.0268912	LIHC
cg12544391	-0.314841	-16.3539	4.35645e-20	1.58525e-14	0.333272	0.021781	LIHC
cg12584551	-0.228896	-12.2009	1.44516e-15	5.25873e-10	0.26015	0.0330076	LIHC
cg12586718	-0.281606	-12.6457	4.2964e-16	1.5634e-10	0.374686	0.0980295	LIHC
cg12598428	-0.347731	-17.5359	3.16721e-21	1.1525e-15	0.375698	0.0307337	LIHC
cg12614178	-0.275732	-17.015	9.88868e-21	3.59835e-15	0.314708	0.048957	LIHC
cg12614702	-0.24326	-9.28387	7.7204e-12	2.80935e-06	0.294876	0.0418407	LIHC
cg12709057	-0.332291	-16.5159	3.01681e-20	1.09778e-14	0.354343	0.0311446	LIHC
cg12726278	-0.246623	-7.34043	4.11351e-09	0.00149685	0.273201	0.0584525	LIHC
cg12727431	-0.256834	-12.7736	3.04548e-16	1.10821e-10	0.292669	0.0329328	LIHC
cg12747864	-0.256988	-16.4035	3.89206e-20	1.41627e-14	0.357164	0.106506	LIHC
cg12858650	0.176796	7.16602	7.34282e-09	0.00267195	0.763354	0.927115	LIHC
cg12882438	-0.206835	-11.4535	1.17396e-14	4.27186e-09	0.267999	0.0429199	LIHC
cg12944030	-0.239177	-12.1886	1.49467e-15	5.43889e-10	0.275345	0.0399046	LIHC
cg13014545	-0.354534	-17.581	2.8738e-21	1.04574e-15	0.370035	0.0187665	LIHC
cg13014982	-0.260483	-17.1531	7.29414e-21	2.65424e-15	0.284668	0.0273075	LIHC
cg13023833	-0.518071	-32.8123	4.1896e-32	1.52454e-26	0.538351	0.0290976	LIHC
cg13024202	-0.281304	-16.9361	1.17773e-20	4.28561e-15	0.303515	0.0274354	LIHC
cg13024624	-0.121604	-9.79023	1.60986e-12	5.85805e-07	0.151104	0.0302767	LIHC
cg13033283	-0.240018	-15.9882	1.00841e-19	3.66948e-14	0.269352	0.0274566	LIHC
cg13115118	-0.254431	-9.19754	1.01175e-11	3.6816e-06	0.315252	0.0487608	LIHC
cg13120260	-0.299547	-6.60108	4.84675e-08	0.0176367	0.409012	0.149089	LIHC
cg13178935	-0.224973	-10.7191	9.86656e-14	3.5903e-08	0.252944	0.0364968	LIHC
cg13182391	-0.34933	-8.68501	5.12799e-11	1.866e-05	0.395297	0.0935473	LIHC
cg13182820	-0.328107	-15.1783	6.80128e-19	2.47489e-13	0.378196	0.0465503	LIHC
cg13189687	-0.21596	-14.6601	2.39449e-18	8.71321e-13	0.246222	0.021411	LIHC
cg13190238	-0.16847	-9.69725	2.14186e-12	7.79393e-07	0.185578	0.0178303	LIHC
cg13203541	-0.382598	-19.1754	1.03468e-22	3.76507e-17	0.405752	0.0253622	LIHC
cg13208429	-0.286677	-10.6413	1.2415e-13	4.51763e-08	0.309272	0.0301769	LIHC
cg13232664	-0.245612	-14.573	2.96696e-18	1.07964e-12	0.273851	0.0272571	LIHC
cg13240932	-0.2867	-16.7876	1.63874e-20	5.96315e-15	0.29905	0.0211401	LIHC
cg13241003	-0.336888	-19.4852	5.56417e-23	2.02472e-17	0.388517	0.0626721	LIHC
cg13244998	-0.457929	-22.0519	4.34083e-25	1.57957e-19	0.484531	0.0313825	LIHC
cg13304035	-0.356831	-11.8233	4.12752e-15	1.50195e-09	0.395194	0.0317399	LIHC
cg13311758	-0.277631	-19.33	7.58457e-23	2.75992e-17	0.290451	0.022558	LIHC
cg13369210	-0.262114	-15.2754	5.38992e-19	1.96132e-13	0.414228	0.159125	LIHC
cg13371527	-0.329097	-15.5678	2.69223e-19	9.79666e-14	0.417053	0.104283	LIHC
cg13430745	-0.155059	-6.33513	1.1822e-07	0.0430187	0.227601	0.0977375	LIHC
cg13440244	0.24447	6.47147	7.4838e-08	0.0272325	0.721051	0.934347	LIHC
cg13532816	-0.234984	-12.0433	2.23458e-15	8.13133e-10	0.255386	0.0202829	LIHC
cg13569417	-0.268031	-10.876	6.22573e-14	2.26545e-08	0.280939	0.0213	LIHC
cg13574945	-0.509603	-36.6908	4.01163e-34	1.45978e-28	0.545782	0.0401915	LIHC
cg13628616	-0.137977	-9.59749	2.91305e-12	1.06002e-06	0.182779	0.0409331	LIHC
cg13645113	-0.208268	-8.60963	6.52672e-11	2.37498e-05	0.25581	0.0401747	LIHC
cg13649400	-0.39252	-22.2539	3.02345e-25	1.10019e-19	0.443188	0.0490029	LIHC
cg13663706	-0.285638	-7.40474	3.32381e-09	0.00120949	0.339981	0.0886041	LIHC
cg13664654	-0.229991	-9.31026	7.10935e-12	2.58699e-06	0.260073	0.0325619	LIHC
cg13680016	-0.294481	-10.9695	4.73823e-14	1.72418e-08	0.338182	0.0519026	LIHC
cg13682241	-0.296365	-12.9518	1.89194e-16	6.88452e-11	0.313705	0.0335411	LIHC
cg13699152	-0.265943	-6.7875	2.59663e-08	0.00944878	0.291346	0.0310734	LIHC
cg13723766	-0.304281	-15.0313	9.68912e-19	3.52573e-13	0.33593	0.0324258	LIHC
cg13751216	-0.0963043	-6.66508	3.91158e-08	0.0142337	0.249137	0.149203	LIHC
cg13771263	-0.293567	-13.567	3.76727e-17	1.37085e-11	0.346595	0.0604416	LIHC
cg13786096	-0.238928	-11.7568	4.97475e-15	1.81024e-09	0.362711	0.134416	LIHC
cg13788004	-0.276316	-11.0171	4.12517e-14	1.50109e-08	0.284103	0.0180103	LIHC
cg13789561	-0.11075	-8.69752	4.92709e-11	1.7929e-05	0.130958	0.0189842	LIHC
cg13915481	-0.392639	-10.8283	7.15845e-14	2.60486e-08	0.425865	0.0668549	LIHC
cg13929206	0.189667	6.53356	6.07741e-08	0.0221148	0.569627	0.73084	LIHC
cg13941987	-0.394066	-23.1813	5.94807e-26	2.16442e-20	0.423983	0.0339377	LIHC
cg13988667	-0.182924	-9.60365	2.85809e-12	1.04002e-06	0.256159	0.0732337	LIHC
cg14004892	-0.249276	-10.4671	2.08186e-13	7.57559e-08	0.280108	0.0349726	LIHC
cg14022645	-0.187865	-8.80685	3.47702e-11	1.26524e-05	0.226332	0.0440563	LIHC
cg14029201	-0.175764	-8.52341	8.60635e-11	3.13173e-05	0.197881	0.0256325	LIHC
cg14061423	-0.18605	-10.6108	1.35875e-13	4.94431e-08	0.2092	0.039337	LIHC
cg14123135	-0.301702	-9.10686	1.3453e-11	4.89537e-06	0.54005	0.230083	LIHC
cg14127907	-0.175179	-10.5006	1.88435e-13	6.85687e-08	0.250885	0.0859988	LIHC
cg14137558	-0.337006	-21.2164	1.99716e-24	7.26739e-19	0.383958	0.0498971	LIHC
cg14191108	-0.350202	-15.0316	9.68289e-19	3.52347e-13	0.374951	0.0356687	LIHC
cg14251139	-0.0791277	-7.08639	9.57226e-09	0.00348321	0.10998	0.0369227	LIHC
cg14295915	-0.398701	-26.0104	5.77289e-28	2.10067e-22	0.406358	0.0198404	LIHC
cg14322166	-0.268629	-10.8166	7.40771e-14	2.69556e-08	0.428434	0.139261	LIHC
cg14343687	-0.290885	-17.3863	4.38051e-21	1.59401e-15	0.386877	0.0970836	LIHC
cg14350469	-0.369606	-20.9529	3.26518e-24	1.18815e-18	0.376096	0.0205312	LIHC
cg14495054	-0.139196	-7.67599	1.35701e-09	0.000493797	0.244352	0.0975457	LIHC
cg14513804	-0.318637	-16.3077	4.83983e-20	1.76115e-14	0.330228	0.018933	LIHC
cg14625604	-0.236481	-13.2579	8.42679e-17	3.06639e-11	0.267005	0.0272179	LIHC
cg14725109	-0.134512	-10.97	4.73112e-14	1.72159e-08	0.166165	0.0379744	LIHC
cg14772107	-0.266475	-9.19095	1.03286e-11	3.75844e-06	0.40507	0.127752	LIHC
cg14783837	-0.322153	-13.3995	5.82035e-17	2.11794e-11	0.345554	0.0271884	LIHC
cg14804181	-0.427754	-13.2062	9.65159e-17	3.51208e-11	0.501396	0.0555893	LIHC
cg14812623	-0.163578	-8.39888	1.28511e-10	4.67633e-05	0.217036	0.0532573	LIHC
cg14828865	-0.153962	-6.63515	4.32392e-08	0.0157341	0.192071	0.0546141	LIHC
cg14831390	-0.224471	-7.68866	1.30154e-09	0.000473613	0.258018	0.0327411	LIHC
cg14972002	-0.239808	-14.7078	2.12971e-18	7.74971e-13	0.255014	0.0182376	LIHC
cg15039826	-0.173899	-7.18267	6.94705e-09	0.00252793	0.215422	0.0519482	LIHC
cg15043283	-0.198437	-7.19871	6.58629e-09	0.00239666	0.245463	0.0381918	LIHC
cg15075851	-0.342633	-13.0175	1.58889e-16	5.78176e-11	0.494677	0.153682	LIHC
cg15133344	-0.176379	-6.74501	2.99329e-08	0.0108921	0.187373	0.0213119	LIHC
cg15162843	-0.218954	-12.2832	1.15227e-15	4.19297e-10	0.257156	0.0526792	LIHC
cg15165694	-0.290054	-14.2116	7.29429e-18	2.65429e-12	0.312486	0.0296631	LIHC
cg15199886	-0.382944	-15.9591	1.07866e-19	3.9251e-14	0.467863	0.084972	LIHC
cg15234550	-0.147513	-9.66296	2.38029e-12	8.66155e-07	0.182266	0.0344604	LIHC
cg15255859	-0.316373	-11.8105	4.27807e-15	1.55673e-09	0.355271	0.0415711	LIHC
cg15257930	-0.375813	-25.5556	1.17934e-27	4.29147e-22	0.43561	0.0591917	LIHC
cg15259400	-0.175312	-12.566	5.33002e-16	1.93952e-10	0.200529	0.0244975	LIHC
cg15308487	-0.247425	-17.0876	8.42517e-21	3.0658e-15	0.26227	0.0204401	LIHC
cg15317927	-0.272356	-11.1651	2.68575e-14	9.77308e-09	0.297839	0.0508309	LIHC
cg15345580	-0.186901	-11.0133	4.17079e-14	1.51769e-08	0.210806	0.0267645	LIHC
cg15391239	-0.302404	-12.4246	7.82806e-16	2.84852e-10	0.349325	0.037992	LIHC
cg15392343	-0.239874	-16.99	1.04498e-20	3.80255e-15	0.257488	0.0267152	LIHC
cg15418221	-0.332832	-20.2597	1.22028e-23	4.44042e-18	0.350514	0.0239301	LIHC
cg15511490	-0.266251	-6.7097	3.36876e-08	0.0122584	0.366811	0.105497	LIHC
cg15521289	-0.273412	-18.7458	2.47877e-22	9.01988e-17	0.322882	0.056189	LIHC
cg15565409	-0.308255	-16.0301	9.1541e-20	3.33105e-14	0.332405	0.0308756	LIHC
cg15582794	-0.273069	-6.80955	2.41198e-08	0.00877687	0.402635	0.14993	LIHC
cg15612444	-0.19553	-7.58162	1.85212e-09	0.00067396	0.231579	0.0416554	LIHC
cg15661671	-0.219597	-12.2688	1.19882e-15	4.36232e-10	0.31604	0.0981811	LIHC
cg15685776	-0.219365	-8.30057	1.76557e-10	6.42467e-05	0.267943	0.0437275	LIHC
cg15686826	-0.128494	-13.091	1.30797e-16	4.75953e-11	0.173982	0.0488405	LIHC
cg15727409	-0.208803	-9.96951	9.31188e-13	3.38846e-07	0.234754	0.0350819	LIHC
cg15755924	-0.207421	-12.044	2.22997e-15	8.11453e-10	0.233506	0.0345853	LIHC
cg15757320	-0.215863	-12.4122	8.0957e-16	2.94591e-10	0.240529	0.0315035	LIHC
cg15769969	-0.152902	-10.1003	6.26135e-13	2.27842e-07	0.175114	0.0338291	LIHC
cg15806723	-0.205014	-17.7769	1.88683e-21	6.86592e-16	0.216954	0.0177768	LIHC
cg15841434	-0.366747	-18.397	5.09869e-22	1.85534e-16	0.449071	0.0903726	LIHC
cg15867166	-0.186608	-13.8986	1.6092e-17	5.85565e-12	0.30423	0.112683	LIHC
cg15874629	-0.241404	-8.5471	7.97581e-11	2.90229e-05	0.278045	0.0457145	LIHC
cg15883201	-0.153151	-8.87911	2.76359e-11	1.00563e-05	0.306098	0.155601	LIHC
cg15891447	-0.271953	-11.6223	7.26879e-15	2.64501e-09	0.297737	0.0428941	LIHC
cg15906134	0.205373	7.30346	4.65043e-09	0.00169223	0.749359	0.935956	LIHC
cg15907464	-0.349198	-17.4425	3.87749e-21	1.41096e-15	0.384448	0.0381676	LIHC
cg15919369	-0.127915	-8.29988	1.76952e-10	6.43904e-05	0.147468	0.0274929	LIHC
cg16059374	-0.259193	-6.54346	5.87901e-08	0.0213929	0.337113	0.0883523	LIHC
cg16119423	-0.281193	-11.1616	2.71378e-14	9.87507e-09	0.341412	0.0621903	LIHC
cg16161440	-0.249081	-14.8527	1.49449e-18	5.43823e-13	0.262579	0.0208234	LIHC
cg16181678	-0.307931	-14.1317	8.9167e-18	3.24466e-12	0.341294	0.0449102	LIHC
cg16200513	-0.185091	-7.29626	4.76287e-09	0.00173314	0.235577	0.0511609	LIHC
cg16211147	-0.305723	-13.6977	2.68965e-17	9.78725e-12	0.340217	0.0331097	LIHC
cg16218862	-0.19874	-8.54731	7.9706e-11	2.90039e-05	0.214485	0.0309427	LIHC
cg16221895	-0.35221	-15.9012	1.23364e-19	4.48905e-14	0.376754	0.027409	LIHC
cg16245086	-0.329054	-13.2753	8.05071e-17	2.92954e-11	0.38292	0.064981	LIHC
cg16248169	-0.187388	-10.5221	1.76729e-13	6.4309e-08	0.197378	0.0211241	LIHC
cg16250105	-0.0913504	-6.56004	5.56121e-08	0.0202365	0.137675	0.045189	LIHC
cg16269097	-0.162283	-8.02829	4.27659e-10	0.000155619	0.202598	0.0358526	LIHC
cg16270385	-0.161754	-11.5794	8.20815e-15	2.98683e-09	0.216882	0.0596638	LIHC
cg16315447	-0.254869	-11.3751	1.46854e-14	5.34381e-09	0.288489	0.0370396	LIHC
cg16318983	-0.334521	-13.5266	4.18293e-17	1.52211e-11	0.372718	0.0423683	LIHC
cg16328033	-0.24666	-10.9637	4.81797e-14	1.75319e-08	0.274068	0.0429209	LIHC
cg16356987	-0.186803	-11.4757	1.10214e-14	4.01055e-09	0.232816	0.0492213	LIHC
cg16403901	-0.311971	-24.1662	1.12333e-26	4.08764e-21	0.366459	0.0546368	LIHC
cg16411111	-0.298887	-14.5161	3.41568e-18	1.24292e-12	0.343395	0.0506841	LIHC
cg16412513	-0.336994	-17.0855	8.46272e-21	3.07946e-15	0.36805	0.0410567	LIHC
cg16431713	-0.298863	-13.3555	6.52787e-17	2.3754e-11	0.334616	0.0400499	LIHC
cg16488754	-0.409651	-16.8949	1.29031e-20	4.69527e-15	0.448572	0.0373262	LIHC
cg16501779	-0.225324	-13.4206	5.50856e-17	2.00449e-11	0.24335	0.0227025	LIHC
cg16510200	-0.336016	-10.8674	6.38387e-14	2.323e-08	0.350025	0.0358826	LIHC
cg16617243	-0.307838	-7.17456	7.13702e-09	0.00259706	0.442297	0.174052	LIHC
cg16638301	-0.34188	-14.1362	8.81715e-18	3.20844e-12	0.370947	0.0298273	LIHC
cg16641060	-0.337304	-11.7397	5.21884e-15	1.89906e-09	0.380238	0.0609736	LIHC
cg16680922	-0.339259	-17.4868	3.5222e-21	1.28168e-15	0.357862	0.0232786	LIHC
cg16692308	-0.118809	-8.56363	7.56371e-11	2.75233e-05	0.173356	0.0458962	LIHC
cg16716035	-0.213593	-7.31734	4.44102e-09	0.00161603	0.238301	0.0286713	LIHC
cg16734817	-0.213984	-13.9584	1.38191e-17	5.02856e-12	0.244459	0.0345508	LIHC
cg16770948	-0.162559	-8.39545	1.29941e-10	4.72837e-05	0.180025	0.0228843	LIHC
cg16778620	-0.203223	-9.95358	9.77453e-13	3.55681e-07	0.243004	0.0443039	LIHC
cg16867483	-0.243529	-14.2393	6.80421e-18	2.47596e-12	0.296164	0.0596447	LIHC
cg16940942	-0.328956	-15.0269	9.79328e-19	3.56364e-13	0.389349	0.0689125	LIHC
cg16949923	-0.22965	-10.1432	5.49963e-13	2.00124e-07	0.263694	0.037221	LIHC
cg16984885	-0.254186	-13.4662	4.89218e-17	1.7802e-11	0.303097	0.0527754	LIHC
cg17033281	-0.179282	-11.2645	2.01698e-14	7.33952e-09	0.200373	0.0212336	LIHC
cg17058724	-0.344054	-9.25427	8.46954e-12	3.08195e-06	0.463631	0.135933	LIHC
cg17149359	-0.247151	-16.6241	2.36394e-20	8.60206e-15	0.300766	0.0487944	LIHC
cg17195879	-0.329324	-18.0775	9.96264e-22	3.62526e-16	0.349095	0.0217604	LIHC
cg17207724	-0.216522	-6.80702	2.43246e-08	0.00885137	0.273929	0.0926481	LIHC
cg17236781	-0.171779	-7.94499	5.61357e-10	0.00020427	0.366272	0.181521	LIHC
cg17246352	-0.204083	-12.5695	5.28015e-16	1.92137e-10	0.233323	0.0325622	LIHC
cg17292622	-0.288629	-7.08689	9.55628e-09	0.00347739	0.342614	0.0864659	LIHC
cg17299883	-0.192264	-6.88934	1.84731e-08	0.00672212	0.246376	0.0515921	LIHC
cg17345036	-0.220162	-14.6615	2.38626e-18	8.68327e-13	0.294058	0.0734314	LIHC
cg17363084	-0.411605	-36.9211	3.08905e-34	1.12406e-28	0.43338	0.0245048	LIHC
cg17376045	-0.296517	-16.3283	4.61857e-20	1.68063e-14	0.394505	0.10902	LIHC
cg17396400	-0.378044	-20.2767	1.18094e-23	4.29727e-18	0.406389	0.0320953	LIHC
cg17399684	-0.432655	-35.7051	1.24969e-33	4.54744e-28	0.455834	0.0254507	LIHC
cg17404000	-0.178121	-10.0224	7.92963e-13	2.88548e-07	0.288029	0.104052	LIHC
cg17466318	-0.381274	-18.2312	7.2091e-22	2.62329e-16	0.409665	0.0356554	LIHC
cg17473615	-0.226525	-10.0693	6.87875e-13	2.50308e-07	0.341839	0.111194	LIHC
cg17548613	-0.312186	-13.2439	8.74336e-17	3.18159e-11	0.369343	0.0634049	LIHC
cg17553592	-0.292699	-10.0467	7.36626e-13	2.68048e-07	0.467365	0.193075	LIHC
cg17565795	-0.217134	-17.0686	8.78417e-21	3.19644e-15	0.378066	0.166589	LIHC
cg17588626	-0.332437	-11.9459	2.9295e-15	1.066e-09	0.426527	0.113075	LIHC
cg17592148	-0.331154	-16.9357	1.17868e-20	4.28904e-15	0.389999	0.0634696	LIHC
cg17603461	-0.156931	-9.37934	5.73114e-12	2.08548e-06	0.215547	0.061444	LIHC
cg17607496	-0.144675	-13.4973	4.5134e-17	1.64236e-11	0.180106	0.0332419	LIHC
cg17620251	-0.319801	-15.4307	3.7236e-19	1.35497e-13	0.356842	0.0455748	LIHC
cg17624691	-0.30993	-12.0027	2.50119e-15	9.10147e-10	0.351253	0.0512553	LIHC
cg17639056	-0.399816	-20.3016	1.12568e-23	4.0962e-18	0.43001	0.0245297	LIHC
cg17658468	-0.188058	-10.8867	6.03281e-14	2.19525e-08	0.23408	0.0397686	LIHC
cg17703220	-0.185317	-7.89417	6.6292e-10	0.000241227	0.243005	0.0544602	LIHC
cg17716100	-0.159428	-6.7152	3.30729e-08	0.0120348	0.215676	0.0561838	LIHC
cg17720011	-0.239465	-26.9951	1.27537e-28	4.64091e-23	0.281037	0.0424877	LIHC
cg17736560	-0.278918	-15.5511	2.80062e-19	1.01911e-13	0.301499	0.0299085	LIHC
cg17776579	-0.306498	-10.5558	1.59905e-13	5.81872e-08	0.300841	0.0200497	LIHC
cg17788031	-0.362878	-20.0153	1.95948e-23	7.13027e-18	0.387287	0.0400311	LIHC
cg17794813	-0.293818	-12.0497	2.1952e-15	7.98802e-10	0.308733	0.0276159	LIHC
cg17800714	-0.393847	-17.4319	3.96795e-21	1.44388e-15	0.40651	0.0254114	LIHC
cg17811760	-0.276156	-17.49	3.49841e-21	1.27302e-15	0.300545	0.0293863	LIHC
cg17831869	-0.348502	-17.8168	1.73246e-21	6.30416e-16	0.377209	0.0305005	LIHC
cg17847781	-0.193517	-10.1797	4.92633e-13	1.79262e-07	0.270428	0.0888791	LIHC
cg17865482	-0.134569	-7.60736	1.70133e-09	0.000619092	0.186209	0.0655544	LIHC
cg17877174	-0.218864	-12.8907	2.2264e-16	8.10156e-11	0.246849	0.0273235	LIHC
cg17920241	-0.272748	-13.6523	3.02324e-17	1.10011e-11	0.295688	0.0224877	LIHC
cg17959735	-0.214625	-9.75363	1.80114e-12	6.55411e-07	0.233726	0.0261687	LIHC
cg17976175	-0.219213	-10.2864	3.57366e-13	1.3004e-07	0.255977	0.0321497	LIHC
cg18015035	-0.326822	-9.57066	3.16479e-12	1.15162e-06	0.360315	0.0442338	LIHC
cg18031773	-0.210043	-10.533	1.71129e-13	6.22713e-08	0.229217	0.0238952	LIHC
cg18107314	-0.39252	-16.5209	2.98292e-20	1.08544e-14	0.454701	0.0661843	LIHC
cg18112782	-0.315384	-15.5344	2.91269e-19	1.05989e-13	0.338413	0.0255729	LIHC
cg18124907	-0.309007	-7.04999	1.08066e-08	0.00393236	0.377951	0.0810837	LIHC
cg18132745	-0.280055	-17.1787	6.89574e-21	2.50926e-15	0.292283	0.0197164	LIHC
cg18140045	-0.400939	-15.9078	1.21502e-19	4.4213e-14	0.43497	0.0443628	LIHC
cg18164076	-0.194701	-6.5366	6.01574e-08	0.0218904	0.24748	0.0519943	LIHC
cg18232738	-0.297881	-16.8664	1.37476e-20	5.00256e-15	0.310529	0.0224324	LIHC
cg18240390	-0.142263	-11.5921	7.91705e-15	2.8809e-09	0.181905	0.035292	LIHC
cg18273575	-0.196496	-13.1422	1.14244e-16	4.15717e-11	0.228734	0.0317331	LIHC
cg18274682	-0.175154	-12.7412	3.32217e-16	1.20889e-10	0.215966	0.048738	LIHC
cg18288715	-0.25551	-13.0511	1.45326e-16	5.2882e-11	0.305302	0.049908	LIHC
cg18383984	-0.308142	-9.42633	4.95125e-12	1.80169e-06	0.322628	0.0290976	LIHC
cg18395382	-0.282293	-10.6209	1.31873e-13	4.79866e-08	0.308962	0.0314369	LIHC
cg18396806	-0.309444	-19.0913	1.22635e-22	4.46253e-17	0.359342	0.0550734	LIHC
cg18397310	-0.293231	-23.5101	3.38716e-26	1.23254e-20	0.326248	0.0435304	LIHC
cg18422972	0.20043	6.32239	1.23382e-07	0.0448971	0.537079	0.722197	LIHC
cg18426655	-0.299306	-13.8702	1.72957e-17	6.29365e-12	0.334016	0.0215675	LIHC
cg18426869	-0.250166	-10.1988	4.65112e-13	1.69248e-07	0.298195	0.0545273	LIHC
cg18515307	-0.205652	-6.39646	9.62388e-08	0.0350199	0.32724	0.0994255	LIHC
cg18542573	-0.264992	-9.66331	2.37774e-12	8.65227e-07	0.292881	0.0362057	LIHC
cg18610025	-0.170192	-13.1885	1.01137e-16	3.68022e-11	0.195017	0.0160743	LIHC
cg18632412	-0.283839	-11.0934	3.30492e-14	1.20262e-08	0.325405	0.0400936	LIHC
cg18636716	-0.263871	-12.4587	7.13275e-16	2.59551e-10	0.288514	0.0220084	LIHC
cg18689730	-0.351646	-29.6104	2.90239e-30	1.05614e-24	0.387723	0.0382797	LIHC
cg18717600	-0.393485	-24.509	6.37574e-27	2.32004e-21	0.411105	0.0241296	LIHC
cg18742441	-0.287964	-13.8013	2.06255e-17	7.50532e-12	0.306259	0.0218367	LIHC
cg18769303	-0.209257	-7.82263	8.38081e-10	0.000304966	0.309191	0.0913185	LIHC
cg18816329	-0.277609	-17.8481	1.62072e-21	5.89756e-16	0.30205	0.0261365	LIHC
cg18818432	-0.133611	-9.6235	2.68827e-12	9.78224e-07	0.215308	0.0817511	LIHC
cg18878700	-0.262619	-18.8289	2.09088e-22	7.60842e-17	0.281982	0.0185883	LIHC
cg18885073	-0.258978	-15.0256	9.82292e-19	3.57442e-13	0.299364	0.0358707	LIHC
cg18932686	-0.432578	-18.702	2.71226e-22	9.86955e-17	0.47636	0.0441144	LIHC
cg18983709	-0.29873	-15.2628	5.55471e-19	2.02128e-13	0.331786	0.0326568	LIHC
cg18989810	-0.325257	-11.6475	6.76822e-15	2.46286e-09	0.391059	0.0750775	LIHC
cg18990292	-0.267144	-11.68	6.17636e-15	2.24749e-09	0.352079	0.078601	LIHC
cg18998000	-0.445987	-20.2328	1.28531e-23	4.67705e-18	0.462006	0.0208984	LIHC
cg19038081	-0.135003	-8.82981	3.23214e-11	1.17613e-05	0.145003	0.0150874	LIHC
cg19041137	-0.178465	-9.45019	4.59742e-12	1.67294e-06	0.19243	0.020302	LIHC
cg19056391	-0.385075	-12.7569	3.18524e-16	1.15906e-10	0.436229	0.0689713	LIHC
cg19060387	-0.279868	-20.148	1.51435e-23	5.5105e-18	0.308405	0.0321743	LIHC
cg19063141	-0.297896	-12.2307	1.33111e-15	4.84373e-10	0.357728	0.0509211	LIHC
cg19180514	-0.299345	-8.00292	4.64572e-10	0.000169051	0.500916	0.193085	LIHC
cg19194595	-0.311042	-15.4472	3.5808e-19	1.303e-13	0.334935	0.0377036	LIHC
cg19214916	-0.179235	-6.43838	8.36178e-08	0.0304274	0.383198	0.165464	LIHC
cg19238394	-0.289136	-11.9606	2.81167e-15	1.02313e-09	0.308008	0.0235802	LIHC
cg19265708	-0.338338	-18.997	1.48454e-22	5.40203e-17	0.389019	0.050612	LIHC
cg19355911	-0.377562	-24.8846	3.45488e-27	1.25718e-21	0.41878	0.0456628	LIHC
cg19383360	-0.22453	-9.0796	1.4659e-11	5.33419e-06	0.313023	0.0866297	LIHC
cg19398192	-0.194614	-6.85343	2.08288e-08	0.00757929	0.214196	0.0237462	LIHC
cg19415339	-0.25533	-18.2763	6.55992e-22	2.38706e-16	0.273953	0.0237348	LIHC
cg19428430	-0.233859	-12.1931	1.47642e-15	5.3725e-10	0.255303	0.027166	LIHC
cg19493242	-0.218938	-10.7312	9.52213e-14	3.46497e-08	0.250522	0.0281472	LIHC
cg19506937	-0.200266	-16.055	8.64156e-20	3.14454e-14	0.224255	0.0275299	LIHC
cg19528502	-0.15624	-7.83202	8.12663e-10	0.000295717	0.18022	0.0254267	LIHC
cg19579913	-0.325248	-9.78317	1.6451e-12	5.98628e-07	0.370301	0.059265	LIHC
cg19580826	-0.1619	-11.0779	3.45683e-14	1.25789e-08	0.21161	0.0530264	LIHC
cg19587616	-0.322814	-19.2742	8.48177e-23	3.0864e-17	0.339821	0.027703	LIHC
cg19605909	-0.291534	-12.6462	4.2904e-16	1.56122e-10	0.375988	0.0912817	LIHC
cg19631766	-0.178418	-7.05233	1.07228e-08	0.00390188	0.223987	0.0451521	LIHC
cg19638040	-0.351836	-16.9939	1.03603e-20	3.76999e-15	0.383359	0.0338895	LIHC
cg19718903	-0.299676	-7.75112	1.05988e-09	0.000385675	0.394134	0.0888676	LIHC
cg19736647	-0.218611	-15.5113	3.07612e-19	1.11936e-13	0.267995	0.0514981	LIHC
cg19748438	-0.221857	-8.96453	2.10815e-11	7.67127e-06	0.249588	0.0335571	LIHC
cg19780807	-0.200598	-13.2931	7.68385e-17	2.79604e-11	0.227662	0.0294456	LIHC
cg19800913	-0.226066	-6.45106	8.01369e-08	0.0291607	0.262958	0.0607067	LIHC
cg19821612	-0.232501	-7.11982	8.56351e-09	0.00311614	0.329773	0.108075	LIHC
cg19840133	-0.234079	-8.36447	1.43606e-10	5.22563e-05	0.271617	0.0362022	LIHC
cg19855812	-0.154864	-7.5018	2.41076e-09	0.000877242	0.190978	0.0336597	LIHC
cg19860695	-0.329485	-12.2443	1.2822e-15	4.66574e-10	0.394486	0.0643856	LIHC
cg19867709	-0.186099	-8.52223	8.63929e-11	3.14372e-05	0.214882	0.0262797	LIHC
cg19937618	-0.216012	-13.9913	1.2714e-17	4.62644e-12	0.284965	0.0683301	LIHC
cg19939909	-0.310682	-16.4033	3.89406e-20	1.41699e-14	0.33638	0.0310165	LIHC
cg19944582	-0.184863	-11.8155	4.21778e-15	1.53479e-09	0.211305	0.0261085	LIHC
cg19963797	-0.24742	-8.0599	3.85776e-10	0.000140379	0.295037	0.0544221	LIHC
cg19998137	-0.293012	-11.8426	3.91011e-15	1.42283e-09	0.360241	0.0533642	LIHC
cg20015269	-0.318798	-13.8224	1.95402e-17	7.11039e-12	0.363998	0.0441516	LIHC
cg20018767	-0.197816	-9.86742	1.27119e-12	4.62568e-07	0.26369	0.0624687	LIHC
cg20020143	-0.154545	-6.8469	2.12881e-08	0.00774644	0.177146	0.0242954	LIHC
cg20074774	-0.27665	-13.7361	2.43732e-17	8.86906e-12	0.342573	0.0739995	LIHC
cg20077602	-0.266799	-18.3408	5.73204e-22	2.08581e-16	0.296459	0.03006	LIHC
cg20113724	-0.350973	-19.9234	2.34444e-23	8.53108e-18	0.366483	0.0253805	LIHC
cg20116159	-0.210323	-6.8143	2.37398e-08	0.00863858	0.273578	0.0710984	LIHC
cg20121427	-0.263123	-15.4955	3.19382e-19	1.16219e-13	0.309534	0.0491792	LIHC
cg20134820	-0.336474	-11.6975	5.87816e-15	2.13898e-09	0.414722	0.0851359	LIHC
cg20135706	-0.12107	-6.71087	3.35562e-08	0.0122106	0.255177	0.129992	LIHC
cg20197861	-0.186356	-6.57918	5.21572e-08	0.0189793	0.20332	0.0203714	LIHC
cg20208613	-0.357371	-21.1518	2.2518e-24	8.19399e-19	0.380287	0.0219238	LIHC
cg20281601	-0.22507	-10.4114	2.45765e-13	8.94304e-08	0.251362	0.0273418	LIHC
cg20291321	-0.333343	-14.1791	7.91469e-18	2.88005e-12	0.410984	0.0874043	LIHC
cg20372745	-0.258364	-8.29382	1.80459e-10	6.56667e-05	0.294514	0.0356475	LIHC
cg20420363	-0.172687	-16.3108	4.80588e-20	1.74879e-14	0.196099	0.0199898	LIHC
cg20421037	-0.381057	-26.3146	3.60166e-28	1.31059e-22	0.401358	0.0229638	LIHC
cg20442640	-0.223777	-6.68421	3.66885e-08	0.0133504	0.319171	0.100239	LIHC
cg20445038	-0.350861	-29.8914	1.96835e-30	7.16253e-25	0.375471	0.0231939	LIHC
cg20455959	-0.407428	-19.9251	2.33658e-23	8.5025e-18	0.44546	0.0435323	LIHC
cg20484507	-0.301214	-16.9688	1.09537e-20	3.98591e-15	0.349864	0.0484534	LIHC
cg20498086	-0.362279	-15.1388	7.47789e-19	2.7211e-13	0.378035	0.0205997	LIHC
cg20517444	-0.255693	-11.2715	1.97662e-14	7.19264e-09	0.294848	0.0344691	LIHC
cg20589243	-0.230585	-7.88337	6.86778e-10	0.000249909	0.283311	0.0497286	LIHC
cg20662913	-0.230103	-6.63581	4.31448e-08	0.0156998	0.264142	0.082958	LIHC
cg20746035	-0.259956	-14.6635	2.37476e-18	8.64141e-13	0.280211	0.0278495	LIHC
cg20749341	-0.42217	-19.8561	2.67451e-23	9.73217e-18	0.451674	0.0346954	LIHC
cg20766178	-0.428322	-10.5286	1.73358e-13	6.30826e-08	0.493866	0.100882	LIHC
cg20775112	-0.154001	-8.89609	2.61865e-11	9.5289e-06	0.166547	0.0172188	LIHC
cg20793193	-0.232766	-7.0467	1.09259e-08	0.0039758	0.279008	0.0566268	LIHC
cg20979765	-0.177498	-12.0592	2.13814e-15	7.78039e-10	0.331624	0.151886	LIHC
cg20983329	-0.234604	-10.5361	1.6954e-13	6.16934e-08	0.327038	0.0895037	LIHC
cg21016188	-0.408887	-16.7721	1.69675e-20	6.17423e-15	0.438387	0.0318019	LIHC
cg21019788	-0.287762	-33.1314	2.80478e-32	1.02062e-26	0.396294	0.107735	LIHC
cg21040109	-0.292373	-8.35232	1.49357e-10	5.43489e-05	0.326545	0.0331002	LIHC
cg21114303	-0.334162	-13.7763	2.19902e-17	8.00193e-12	0.538107	0.207519	LIHC
cg21137943	-0.330558	-15.5794	2.61961e-19	9.53238e-14	0.381417	0.0508925	LIHC
cg21156383	-0.307916	-9.34753	6.32857e-12	2.30288e-06	0.327074	0.0277176	LIHC
cg21161328	-0.218022	-16.8646	1.38047e-20	5.02334e-15	0.251069	0.0323951	LIHC
cg21202708	-0.1685	-6.93344	1.5943e-08	0.00580145	0.195668	0.0236584	LIHC
cg21205654	-0.119625	-9.10999	1.33214e-11	4.84748e-06	0.388804	0.267468	LIHC
cg21284493	-0.423006	-29.5379	3.2097e-30	1.16796e-24	0.479368	0.0635399	LIHC
cg21290550	-0.43061	-21.4613	1.27033e-24	4.62256e-19	0.463569	0.0386082	LIHC
cg21331369	-0.321462	-14.5646	3.02981e-18	1.10251e-12	0.349403	0.0342821	LIHC
cg21341170	-0.411081	-19.6271	4.19826e-23	1.52769e-17	0.463991	0.0496277	LIHC
cg21364772	-0.253197	-13.1503	1.11828e-16	4.06926e-11	0.280551	0.0235339	LIHC
cg21411942	-0.250635	-10.487	1.96206e-13	7.13965e-08	0.295025	0.0437612	LIHC
cg21473514	-0.324476	-26.4586	2.88566e-28	1.05005e-22	0.415421	0.0914123	LIHC
cg21474854	-0.236009	-13.0385	1.50275e-16	5.4683e-11	0.269762	0.0356195	LIHC
cg21502819	0.194476	6.86079	2.03223e-08	0.00739498	0.603624	0.785666	LIHC
cg21545785	-0.279758	-14.8142	1.64173e-18	5.97401e-13	0.304412	0.0253914	LIHC
cg21547183	-0.103069	-7.28264	4.98314e-09	0.00181329	0.200498	0.0996718	LIHC
cg21597797	-0.230808	-8.27964	1.88935e-10	6.87508e-05	0.257103	0.03241	LIHC
cg21602092	-0.143358	-9.42457	4.97845e-12	1.81159e-06	0.172688	0.0294177	LIHC
cg21727314	-0.163008	-9.12917	1.25413e-11	4.56361e-06	0.186698	0.0272232	LIHC
cg21762935	-0.186555	-7.24166	5.70995e-09	0.00207777	0.220057	0.0350598	LIHC
cg21776057	-0.140647	-6.88777	1.85704e-08	0.00675752	0.178045	0.0352373	LIHC
cg21785054	-0.205727	-12.6889	3.82458e-16	1.39171e-10	0.254573	0.0520491	LIHC
cg21864829	-0.289108	-11.8594	3.72996e-15	1.35728e-09	0.452482	0.161674	LIHC
cg21880156	-0.25887	-9.00403	1.86064e-11	6.7706e-06	0.31931	0.0828935	LIHC
cg21881821	-0.355449	-14.8263	1.59406e-18	5.80057e-13	0.38323	0.0284521	LIHC
cg21887683	-0.247494	-12.2847	1.14762e-15	4.17605e-10	0.257358	0.0262559	LIHC
cg21888438	-0.161696	-7.53045	2.19299e-09	0.000798	0.207346	0.0427609	LIHC
cg21903569	-0.304542	-14.293	5.94884e-18	2.1647e-12	0.327228	0.0246291	LIHC
cg21911363	-0.286898	-16.0944	7.89197e-20	2.87178e-14	0.310089	0.0218686	LIHC
cg21945665	-0.197594	-10.0274	7.80952e-13	2.84178e-07	0.263804	0.066295	LIHC
cg21953876	-0.348351	-20.1271	1.57699e-23	5.73844e-18	0.379848	0.0315741	LIHC
cg21960840	-0.284479	-11.2048	2.39515e-14	8.71563e-09	0.311528	0.0184549	LIHC
cg21966453	-0.30788	-16.3405	4.49146e-20	1.63438e-14	0.322431	0.0148704	LIHC
cg21978299	-0.145709	-11.1345	2.93428e-14	1.06774e-08	0.159899	0.0173048	LIHC
cg22044840	-0.233533	-8.95539	2.17005e-11	7.8965e-06	0.244396	0.0281001	LIHC
cg22050539	-0.163035	-8.49385	9.4644e-11	3.44396e-05	0.193052	0.0383756	LIHC
cg22055524	-0.234871	-7.38213	3.58242e-09	0.00130359	0.28646	0.0740058	LIHC
cg22069441	-0.139729	-7.18313	6.93644e-09	0.00252407	0.166895	0.0282099	LIHC
cg22069989	-0.266341	-9.08807	1.4273e-11	5.19373e-06	0.31009	0.0441144	LIHC
cg22164912	-0.375929	-23.9965	1.49076e-26	5.42467e-21	0.383007	0.0174295	LIHC
cg22226984	0.173451	6.83664	2.20315e-08	0.00801695	0.701586	0.863622	LIHC
cg22275278	-0.298717	-16.6899	2.0393e-20	7.42074e-15	0.346241	0.0490147	LIHC
cg22332884	-0.268415	-10.4897	1.94634e-13	7.08245e-08	0.307023	0.0389042	LIHC
cg22355031	0.219549	7.90367	6.42626e-10	0.000233843	0.592792	0.786532	LIHC
cg22364374	-0.251127	-7.92466	5.9997e-10	0.000218321	0.340127	0.099746	LIHC
cg22366618	-0.22087	-12.2732	1.18438e-15	4.30978e-10	0.32468	0.108067	LIHC
cg22417589	-0.33771	-15.7074	1.93906e-19	7.05596e-14	0.383603	0.0495853	LIHC
cg22449896	-0.245087	-14.9382	1.21406e-18	4.41779e-13	0.296887	0.0520327	LIHC
cg22561883	-0.358537	-15.685	2.04377e-19	7.43699e-14	0.384529	0.0327018	LIHC
cg22662205	-0.273663	-14.247	6.67382e-18	2.42851e-12	0.320207	0.0513424	LIHC
cg22672606	-0.129438	-6.38894	9.86968e-08	0.0359144	0.179592	0.0514708	LIHC
cg22674664	-0.250756	-14.9783	1.10165e-18	4.00874e-13	0.303578	0.054694	LIHC
cg22682304	-0.373728	-18.1941	7.79313e-22	2.83581e-16	0.430804	0.0418541	LIHC
cg22682567	-0.355016	-17.2381	6.05393e-21	2.20294e-15	0.3742	0.0300313	LIHC
cg22776211	-0.357041	-8.42026	1.19948e-10	4.36474e-05	0.479347	0.157963	LIHC
cg22784592	-0.244696	-13.8971	1.61511e-17	5.87715e-12	0.250342	0.0130772	LIHC
cg22817042	-0.384426	-20.5352	7.19603e-24	2.61853e-18	0.447371	0.0688981	LIHC
cg22817647	-0.342415	-19.0568	1.31499e-22	4.78508e-17	0.369528	0.0272179	LIHC
cg22823767	-0.284034	-10.6147	1.34295e-13	4.8868e-08	0.323444	0.0475752	LIHC
cg22850802	-0.253016	-10.0308	7.7292e-13	2.81255e-07	0.257396	0.0167071	LIHC
cg22913932	-0.210191	-15.1151	7.91556e-19	2.88036e-13	0.245609	0.0365861	LIHC
cg22918218	-0.210473	-12.7121	3.59289e-16	1.3074e-10	0.239535	0.0288275	LIHC
cg22969661	-0.407736	-27.903	3.30899e-29	1.2041e-23	0.432248	0.0291859	LIHC
cg23064627	-0.337041	-7.92599	5.97351e-10	0.000217368	0.488983	0.200783	LIHC
cg23091104	-0.222425	-9.93644	1.02982e-12	3.74737e-07	0.248578	0.0335555	LIHC
cg23121114	-0.391024	-18.5378	3.80585e-22	1.38489e-16	0.408631	0.018878	LIHC
cg23124867	-0.232054	-6.33933	1.16566e-07	0.0424168	0.307203	0.0603015	LIHC
cg23143524	-0.442245	-19.8076	2.94136e-23	1.07032e-17	0.464547	0.0309235	LIHC
cg23175583	-0.300545	-17.6012	2.75141e-21	1.0012e-15	0.326996	0.0253803	LIHC
cg23181142	-0.137568	-9.21484	9.58328e-12	3.48722e-06	0.169196	0.0407215	LIHC
cg23184276	-0.349488	-10.549	1.63168e-13	5.93745e-08	0.367363	0.0468625	LIHC
cg23214760	-0.261237	-15.294	5.15509e-19	1.87586e-13	0.273792	0.0184688	LIHC
cg23214992	-0.26041	-12.6507	4.23866e-16	1.54239e-10	0.306215	0.0405081	LIHC
cg23221544	-0.158659	-6.70967	3.36912e-08	0.0122598	0.205576	0.0450377	LIHC
cg23238851	-0.132399	-6.96673	1.42661e-08	0.00519124	0.147837	0.0174856	LIHC
cg23299576	-0.297673	-13.2339	8.97547e-17	3.26605e-11	0.334819	0.0393626	LIHC
cg23323745	-0.173876	-8.79359	3.62687e-11	1.31977e-05	0.198196	0.0255266	LIHC
cg23408987	-0.303909	-14.0856	1.00153e-17	3.64441e-12	0.337125	0.0344879	LIHC
cg23429746	-0.356869	-8.49943	9.29611e-11	3.38272e-05	0.490039	0.139572	LIHC
cg23443158	-0.34501	-15.7964	1.57478e-19	5.73041e-14	0.371135	0.0365291	LIHC
cg23455407	-0.264575	-12.6496	4.2513e-16	1.54699e-10	0.310392	0.0520646	LIHC
cg23475462	-0.137128	-8.60898	6.54013e-11	2.37986e-05	0.179386	0.0521864	LIHC
cg23475921	-0.23257	-10.1123	6.03943e-13	2.19766e-07	0.335323	0.117372	LIHC
cg23483095	-0.198283	-7.48299	2.56542e-09	0.000933521	0.28165	0.092058	LIHC
cg23484208	-0.236969	-11.2851	1.90081e-14	6.91678e-09	0.268527	0.0303448	LIHC
cg23493872	-0.396629	-13.5703	3.7358e-17	1.35941e-11	0.436207	0.0365568	LIHC
cg23503517	-0.37936	-25.0784	2.52653e-27	9.1937e-22	0.387542	0.019812	LIHC
cg23534593	-0.198912	-8.46792	1.02879e-10	3.74361e-05	0.266554	0.0582003	LIHC
cg23543766	-0.322238	-8.57387	7.31926e-11	2.66338e-05	0.37958	0.0462238	LIHC
cg23612178	-0.202349	-10.4484	2.20096e-13	8.009e-08	0.220182	0.0208499	LIHC
cg23623404	-0.226372	-8.37031	1.40922e-10	5.12797e-05	0.335912	0.106047	LIHC
cg23627980	-0.376748	-17.7306	2.08334e-21	7.58099e-16	0.422546	0.0400634	LIHC
cg23696472	-0.504892	-32.0628	1.09073e-31	3.96902e-26	0.533883	0.0400006	LIHC
cg23712855	-0.357258	-17.7838	1.85904e-21	6.76478e-16	0.378567	0.0223635	LIHC
cg23731466	-0.137337	-11.3837	1.43288e-14	5.21403e-09	0.278253	0.144425	LIHC
cg23834765	-0.30357	-15.0423	9.43512e-19	3.43331e-13	0.368822	0.057761	LIHC
cg23851205	-0.136045	-6.44725	8.11693e-08	0.0295364	0.170087	0.0353008	LIHC
cg23857909	-0.379868	-17.6885	2.28043e-21	8.29815e-16	0.404954	0.0293647	LIHC
cg23860088	-0.231981	-12.1559	1.63605e-15	5.95336e-10	0.250556	0.0250029	LIHC
cg23896353	-0.272989	-10.6961	1.056e-13	3.84263e-08	0.308699	0.033427	LIHC
cg23919845	-0.290392	-10.8827	6.10401e-14	2.22116e-08	0.330689	0.0431226	LIHC
cg23948993	-0.146329	-6.41115	9.16141e-08	0.0333371	0.213806	0.0593919	LIHC
cg23951868	-0.411603	-34.7157	4.02836e-33	1.46586e-27	0.429791	0.0217282	LIHC
cg23954206	-0.279527	-11.5334	9.353e-15	3.40342e-09	0.303224	0.0320467	LIHC
cg23955842	-0.202187	-6.62869	4.41854e-08	0.0160784	0.266552	0.0922937	LIHC
cg23990273	-0.240728	-7.1334	8.18496e-09	0.00297839	0.335427	0.104676	LIHC
cg23993836	-0.286881	-15.5005	3.15579e-19	1.14835e-13	0.336829	0.049045	LIHC
cg24034992	-0.257898	-18.7849	2.28785e-22	8.32515e-17	0.281553	0.0317654	LIHC
cg24035229	-0.272312	-14.8313	1.57438e-18	5.72893e-13	0.292993	0.0292362	LIHC
cg24156746	-0.300276	-21.622	9.46182e-25	3.44302e-19	0.338755	0.0408579	LIHC
cg24157854	-0.269005	-8.34079	1.55027e-10	5.6412e-05	0.299647	0.0701919	LIHC
cg24186901	-0.419137	-17.7162	2.14855e-21	7.81828e-16	0.434643	0.0239354	LIHC
cg24195365	-0.248416	-12.716	3.55527e-16	1.29371e-10	0.283844	0.0404324	LIHC
cg24347720	-0.302807	-7.29141	4.84027e-09	0.00176131	0.345701	0.046589	LIHC
cg24461939	-0.134421	-8.63475	6.0222e-11	2.19139e-05	0.172987	0.0363457	LIHC
cg24547622	-0.162711	-13.8146	1.99337e-17	7.2536e-12	0.189347	0.0286098	LIHC
cg24549608	-0.229169	-14.3134	5.65228e-18	2.05678e-12	0.259952	0.0295868	LIHC
cg24552529	-0.141022	-8.15762	2.80684e-10	0.000102137	0.216794	0.06439	LIHC
cg24559073	-0.268793	-14.0204	1.18098e-17	4.29741e-12	0.29657	0.0237382	LIHC
cg24597825	-0.291457	-20.8006	4.349e-24	1.58254e-18	0.309702	0.0202314	LIHC
cg24627619	-0.260092	-12.5551	5.48916e-16	1.99743e-10	0.286397	0.0289462	LIHC
cg24657313	-0.152926	-9.48595	4.11429e-12	1.49713e-06	0.167139	0.014836	LIHC
cg24671250	-0.200469	-9.69032	2.188e-12	7.96183e-07	0.294172	0.10326	LIHC
cg24701794	-0.208049	-15.7413	1.79127e-19	6.51819e-14	0.230552	0.0234473	LIHC
cg24714634	-0.155727	-10.2188	4.37896e-13	1.59344e-07	0.180867	0.0293534	LIHC
cg24721916	-0.277294	-13.163	1.08158e-16	3.93574e-11	0.284915	0.0222831	LIHC
cg24740922	-0.374796	-30.212	1.26907e-30	4.61797e-25	0.39799	0.0243067	LIHC
cg24741392	-0.256359	-9.33489	6.58299e-12	2.39546e-06	0.309352	0.059555	LIHC
cg24748621	-0.384659	-31.518	2.21548e-31	8.06182e-26	0.424202	0.0437533	LIHC
cg24765005	-0.151633	-6.78799	2.59237e-08	0.00943327	0.20444	0.0629478	LIHC
cg24783624	-0.207564	-9.35001	6.27971e-12	2.2851e-06	0.233914	0.0366219	LIHC
cg24814801	-0.155993	-9.34784	6.32237e-12	2.30062e-06	0.189827	0.0383576	LIHC
cg24816350	-0.211149	-7.0286	1.16056e-08	0.0042231	0.231303	0.0324308	LIHC
cg24832428	-0.265404	-14.2164	7.2073e-18	2.62263e-12	0.291975	0.0253788	LIHC
cg24863802	-0.286666	-13.2444	8.72987e-17	3.17668e-11	0.340397	0.0611539	LIHC
cg24884420	-0.266514	-11.1673	2.66901e-14	9.71217e-09	0.293691	0.0341599	LIHC
cg24925526	-0.362505	-16.4537	3.47287e-20	1.26373e-14	0.388085	0.0481651	LIHC
cg24931094	-0.156092	-6.78811	2.59133e-08	0.00942948	0.185357	0.0264697	LIHC
cg24931882	-0.189833	-10.6047	1.38362e-13	5.0348e-08	0.240587	0.0520318	LIHC
cg24971873	-0.326955	-8.72153	4.56347e-11	1.66058e-05	0.433285	0.129678	LIHC
cg24976080	-0.131295	-10.6952	1.05866e-13	3.85231e-08	0.179901	0.0414223	LIHC
cg25073957	-0.305581	-12.8426	2.53136e-16	9.21128e-11	0.349222	0.0448708	LIHC
cg25080215	-0.170711	-13.3597	6.45571e-17	2.34914e-11	0.411792	0.236956	LIHC
cg25124605	-0.324302	-18.3159	6.03825e-22	2.19724e-16	0.344129	0.0282468	LIHC
cg25125864	-0.152651	-12.0743	2.05032e-15	7.46084e-10	0.31439	0.155803	LIHC
cg25132467	-0.324356	-6.36467	1.07066e-07	0.0389599	0.564598	0.281543	LIHC
cg25156485	-0.235465	-6.39008	9.83221e-08	0.035778	0.334365	0.0777998	LIHC
cg25158266	-0.162785	-7.53917	2.1307e-09	0.000775332	0.250244	0.0889149	LIHC
cg25165659	-0.277086	-14.8366	1.55431e-18	5.65592e-13	0.331709	0.0548298	LIHC
cg25166062	-0.257769	-13.9169	1.53594e-17	5.58906e-12	0.272521	0.0207678	LIHC
cg25206026	-0.424826	-17.5407	3.13513e-21	1.14083e-15	0.463587	0.046993	LIHC
cg25225807	-0.251418	-13.1305	1.17835e-16	4.28784e-11	0.276317	0.0244315	LIHC
cg25237542	-0.250856	-8.67657	5.26809e-11	1.91698e-05	0.33602	0.124985	LIHC
cg25321762	-0.271304	-14.7242	2.04575e-18	7.44421e-13	0.322735	0.0461977	LIHC
cg25364049	-0.325188	-16.3763	4.14036e-20	1.50662e-14	0.431959	0.110821	LIHC
cg25402895	-0.258838	-11.8374	3.9674e-15	1.44368e-09	0.39044	0.135221	LIHC
cg25415674	-0.310289	-21.3616	1.52642e-24	5.55443e-19	0.386907	0.0799863	LIHC
cg25427918	-0.321518	-16.6827	2.07258e-20	7.54183e-15	0.343724	0.0180439	LIHC
cg25496213	-0.263472	-12.3879	8.65063e-16	3.14784e-10	0.320388	0.0542894	LIHC
cg25499687	-0.238962	-10.0358	7.61352e-13	2.77045e-07	0.289271	0.0565499	LIHC
cg25528646	-0.362694	-8.88294	2.73018e-11	9.93474e-06	0.444446	0.110469	LIHC
cg25547663	-0.130592	-8.09227	3.47167e-10	0.000126329	0.177752	0.0512468	LIHC
cg25553791	-0.244362	-9.93772	1.02581e-12	3.73277e-07	0.26995	0.0336185	LIHC
cg25553924	-0.185638	-11.4138	1.315e-14	4.7851e-09	0.201519	0.0229513	LIHC
cg25558406	-0.207349	-10.3245	3.18776e-13	1.15998e-07	0.233909	0.0286485	LIHC
cg25571060	-0.235755	-11.1523	2.78762e-14	1.01438e-08	0.257454	0.0275933	LIHC
cg25587058	-0.275834	-9.48087	4.1797e-12	1.52093e-06	0.475594	0.20431	LIHC
cg25656978	-0.344196	-14.3957	4.604e-18	1.67533e-12	0.365427	0.0315728	LIHC
cg25698940	-0.287711	-14.3172	5.59993e-18	2.03774e-12	0.312078	0.0315797	LIHC
cg25714218	-0.331631	-13.563	3.80664e-17	1.38518e-11	0.349429	0.0205169	LIHC
cg25736204	-0.176186	-9.38537	5.62437e-12	2.04663e-06	0.201696	0.0376682	LIHC
cg25790081	-0.256347	-15.4678	3.40996e-19	1.24084e-13	0.29436	0.0474601	LIHC
cg25813447	-0.245348	-10.8581	6.56081e-14	2.38739e-08	0.27136	0.0452364	LIHC
cg25821416	0.200371	6.52428	6.2694e-08	0.0228135	0.787231	0.960385	LIHC
cg25837617	-0.335492	-21.8057	6.77059e-25	2.46372e-19	0.35847	0.0307115	LIHC
cg25848037	-0.371643	-14.6489	2.461e-18	8.95523e-13	0.440483	0.0521688	LIHC
cg25858008	-0.298573	-16.1726	6.59276e-20	2.39901e-14	0.34017	0.04307	LIHC
cg25875683	-0.165724	-9.45885	4.47531e-12	1.6285e-06	0.285695	0.108476	LIHC
cg25892640	-0.326905	-18.3904	5.16896e-22	1.88091e-16	0.359209	0.0439953	LIHC
cg25896944	-0.234668	-10.266	3.79958e-13	1.38261e-07	0.432753	0.191764	LIHC
cg25905965	-0.137505	-8.34985	1.50551e-10	5.47834e-05	0.233096	0.090437	LIHC
cg25911220	-0.247869	-13.2191	9.33116e-17	3.39548e-11	0.30914	0.0681791	LIHC
cg25941716	-0.208739	-10.0877	6.50448e-13	2.36689e-07	0.233178	0.0294383	LIHC
cg26001150	-0.180577	-6.75054	2.93841e-08	0.0106925	0.272705	0.0868287	LIHC
cg26010110	-0.269892	-6.71077	3.35666e-08	0.0122144	0.396519	0.0931643	LIHC
cg26020914	-0.273964	-7.21509	6.23701e-09	0.00226956	0.302599	0.0314015	LIHC
cg26023405	-0.468879	-33.0495	3.10797e-32	1.13095e-26	0.491482	0.0200721	LIHC
cg26059639	-0.412032	-16.37	4.19999e-20	1.52832e-14	0.484615	0.0792398	LIHC
cg26105341	-0.247862	-9.77671	1.67798e-12	6.10594e-07	0.303533	0.0667595	LIHC
cg26116400	-0.177133	-8.91012	2.50465e-11	9.11407e-06	0.263211	0.0873649	LIHC
cg26121752	-0.256383	-11.0888	3.34991e-14	1.21898e-08	0.302053	0.0519312	LIHC
cg26133460	-0.147866	-10.6743	1.126e-13	4.09737e-08	0.160056	0.0220798	LIHC
cg26146690	-0.273689	-10.0046	8.36926e-13	3.04546e-07	0.357708	0.0905294	LIHC
cg26159385	-0.227407	-10.4311	2.31793e-13	8.43462e-08	0.276196	0.050316	LIHC
cg26234774	-0.203212	-10.263	3.83376e-13	1.39505e-07	0.296007	0.0928287	LIHC
cg26246138	-0.297946	-12.3886	8.63592e-16	3.14249e-10	0.310507	0.0207607	LIHC
cg26289980	-0.100698	-7.6119	1.67603e-09	0.000609884	0.187173	0.0861662	LIHC
cg26308359	-0.2924	-17.9395	1.33428e-21	4.85525e-16	0.328323	0.0392283	LIHC
cg26333397	-0.304844	-19.6211	4.24887e-23	1.5461e-17	0.35271	0.0410416	LIHC
cg26340003	-0.125391	-6.72238	3.22878e-08	0.0117491	0.158556	0.028856	LIHC
cg26342575	-0.252779	-13.3134	7.28648e-17	2.65145e-11	0.285748	0.0313759	LIHC
cg26359238	-0.297262	-14.3727	4.87583e-18	1.77425e-12	0.321953	0.0305193	LIHC
cg26359958	-0.258977	-11.8715	3.60598e-15	1.31217e-09	0.277237	0.0359891	LIHC
cg26368752	-0.27329	-10.3094	3.33496e-13	1.21355e-07	0.297704	0.029934	LIHC
cg26376518	-0.18178	-9.3448	6.38256e-12	2.32253e-06	0.218714	0.0399104	LIHC
cg26380710	-0.350916	-8.72205	4.55582e-11	1.6578e-05	0.400587	0.0784134	LIHC
cg26410404	-0.198146	-7.87168	7.13579e-10	0.000259661	0.263536	0.0443922	LIHC
cg26418790	-0.371671	-20.9293	3.41306e-24	1.24196e-18	0.390584	0.0319097	LIHC
cg26421947	-0.201273	-10.8384	6.95008e-14	2.52904e-08	0.303016	0.0995171	LIHC
cg26439324	-0.367069	-12.6855	3.85951e-16	1.40442e-10	0.512587	0.116946	LIHC
cg26505478	-0.388757	-17.2989	5.30017e-21	1.92866e-15	0.40984	0.024184	LIHC
cg26518560	-0.212064	-13.1386	1.1534e-16	4.19707e-11	0.221372	0.0172771	LIHC
cg26540943	-0.26208	-18.9909	1.50305e-22	5.4694e-17	0.290454	0.0262334	LIHC
cg26578373	-0.114571	-7.99124	4.82623e-10	0.00017562	0.164133	0.0458772	LIHC
cg26584339	-0.448707	-17.7306	2.08328e-21	7.58076e-16	0.491246	0.0435875	LIHC
cg26590811	-0.253222	-11.9463	2.92637e-15	1.06487e-09	0.29371	0.0415064	LIHC
cg26620546	-0.221205	-9.80676	1.53039e-12	5.56887e-07	0.253206	0.0302491	LIHC
cg26680189	-0.353715	-28.525	1.34303e-29	4.88708e-24	0.363481	0.0184047	LIHC
cg26682103	-0.396917	-34.8754	3.32773e-33	1.21091e-27	0.432337	0.0379593	LIHC
cg26703319	-0.355606	-17.4261	4.0182e-21	1.46217e-15	0.414047	0.0699274	LIHC
cg26744454	-0.281468	-15.2588	5.60772e-19	2.04057e-13	0.302846	0.0253999	LIHC
cg26745032	-0.345744	-19.4711	5.72251e-23	2.08234e-17	0.365838	0.0226697	LIHC
cg26746069	-0.272288	-14.2941	5.9316e-18	2.15843e-12	0.307968	0.0383492	LIHC
cg26756979	-0.32147	-15.8788	1.29966e-19	4.72929e-14	0.350445	0.0320485	LIHC
cg26764180	-0.171032	-9.27492	7.93971e-12	2.88915e-06	0.195052	0.0274722	LIHC
cg26764972	-0.290102	-16.8648	1.37961e-20	5.02021e-15	0.331597	0.0426639	LIHC
cg26777746	-0.197572	-9.0649	1.53541e-11	5.58715e-06	0.242857	0.0500049	LIHC
cg26791257	-0.18736	-9.47278	4.28599e-12	1.55961e-06	0.212727	0.0258061	LIHC
cg26799772	-0.319766	-16.3942	3.97524e-20	1.44653e-14	0.346465	0.0286743	LIHC
cg26802102	-0.239651	-12.1951	1.46844e-15	5.34343e-10	0.259152	0.0251302	LIHC
cg26806511	-0.187545	-8.95237	2.19088e-11	7.97231e-06	0.277531	0.0935759	LIHC
cg26811602	-0.310599	-13.9585	1.38184e-17	5.02832e-12	0.345485	0.0332079	LIHC
cg26896756	-0.279027	-14.3125	5.66522e-18	2.06149e-12	0.281027	0.0189861	LIHC
cg26927606	-0.273752	-21.3525	1.55223e-24	5.64835e-19	0.284476	0.0198057	LIHC
cg26939525	-0.182993	-11.3317	1.66308e-14	6.05173e-09	0.217892	0.0332172	LIHC
cg26950400	-0.188226	-8.14893	2.88721e-10	0.000105062	0.217666	0.0317463	LIHC
cg27059259	-0.304879	-16.8016	1.58847e-20	5.78023e-15	0.330721	0.0369711	LIHC
cg27069132	-0.393319	-27.8672	3.48735e-29	1.269e-23	0.402086	0.0157249	LIHC
cg27123903	-0.380918	-23.7055	2.43155e-26	8.84805e-21	0.395923	0.0162481	LIHC
cg27124847	-0.300595	-11.3105	1.76741e-14	6.43135e-09	0.322105	0.0385296	LIHC
cg27207144	-0.300296	-19.8935	2.48561e-23	9.0448e-18	0.334117	0.0338464	LIHC
cg27251926	-0.164634	-7.8168	8.54268e-10	0.000310856	0.278843	0.129883	LIHC
cg27260927	-0.284853	-12.3947	8.49222e-16	3.0902e-10	0.392018	0.0744198	LIHC
cg27268405	-0.355686	-17.6479	2.48799e-21	9.05345e-16	0.373105	0.0223917	LIHC
cg27296089	-0.223109	-7.18341	6.92998e-09	0.00252172	0.285934	0.062331	LIHC
cg27327591	-0.296808	-20.0823	1.72027e-23	6.25983e-18	0.340597	0.046096	LIHC
cg27419028	-0.189674	-7.70022	1.25298e-09	0.000455941	0.199286	0.0245341	LIHC
cg27435491	-0.192779	-12.5927	4.95743e-16	1.80394e-10	0.226316	0.0290621	LIHC
cg27470278	-0.295388	-11.1121	3.13091e-14	1.13929e-08	0.294512	0.0199764	LIHC
cg27471304	-0.231764	-8.54034	8.15102e-11	2.96604e-05	0.260884	0.0301623	LIHC
cg27474516	-0.304934	-18.1873	7.90614e-22	2.87693e-16	0.404878	0.0988281	LIHC
cg27488875	-0.239188	-8.95998	2.13877e-11	7.78267e-06	0.35753	0.100124	LIHC
cg27496708	-0.207415	-6.67999	3.72106e-08	0.0135404	0.282153	0.0656069	LIHC
cg27501007	-0.377041	-16.7225	1.89542e-20	6.89719e-15	0.408478	0.0343947	LIHC
cg27501723	-0.368708	-20.6113	6.22525e-24	2.26528e-18	0.393192	0.0278852	LIHC
cg27558057	-0.435864	-18.0769	9.97529e-22	3.62987e-16	0.49485	0.0599442	LIHC
cg27581839	-0.205034	-7.07401	9.9754e-09	0.00362991	0.24633	0.0332534	LIHC
cg27586390	-0.157698	-8.7517	4.14467e-11	1.50819e-05	0.16473	0.0155173	LIHC
cg27592925	-0.401592	-18.3813	5.26745e-22	1.91675e-16	0.450644	0.0641804	LIHC
cg27595778	-0.157835	-13.397	5.8576e-17	2.1315e-11	0.171246	0.0172358	LIHC
cg27606669	-0.230691	-8.20506	2.40606e-10	8.75531e-05	0.360379	0.16206	LIHC
cg27609342	-0.317751	-7.0845	9.63261e-09	0.00350517	0.458006	0.161423	LIHC
cg27609596	-0.25492	-7.29633	4.76174e-09	0.00173273	0.395906	0.158201	LIHC
cg27637296	0.201141	7.88094	6.9228e-10	0.000251911	0.660515	0.85705	LIHC
cg00167275	-0.203654	-11.1472	2.82845e-14	1.02923e-08	0.237575	0.0371404	LIHC
cg00804338	-0.0936673	-6.52841	6.18334e-08	0.0225003	0.125299	0.0387514	LIHC
cg00005617	0.208699	7.38137	3.5914e-09	0.00130686	0.691116	0.865732	LIHC
cg00006815	-0.268338	-9.83645	1.39742e-12	5.08501e-07	0.299947	0.0359559	LIHC
cg00029931	-0.312284	-13.1245	1.19713e-16	4.35619e-11	0.329079	0.0211162	LIHC
cg00031235	0.130381	6.40921	9.22113e-08	0.0335544	0.851365	0.976142	LIHC
cg00046099	-0.490354	-18.6845	2.81197e-22	1.02324e-16	0.553115	0.0672156	LIHC
cg00108056	-0.258577	-14.2481	6.65596e-18	2.42201e-12	0.28182	0.0301021	LIHC
cg00111239	-0.300801	-9.70092	2.11782e-12	7.70645e-07	0.326449	0.0316936	LIHC
cg00113623	-0.44744	-28.2453	2.01018e-29	7.31475e-24	0.49648	0.0516297	LIHC
cg00115511	-0.345318	-15.7227	1.87087e-19	6.80782e-14	0.367878	0.0340568	LIHC
cg00128197	-0.305361	-11.2627	2.02743e-14	7.37753e-09	0.313494	0.0180904	LIHC
cg00130498	0.232932	8.56927	7.42822e-11	2.70303e-05	0.686788	0.912344	LIHC
cg00139547	-0.338163	-16.6907	2.03557e-20	7.40717e-15	0.37343	0.0323835	LIHC
cg00140189	0.273832	11.2589	2.04965e-14	7.4584e-09	0.686408	0.948942	LIHC
cg00145348	-0.273413	-13.247	8.67168e-17	3.1555e-11	0.288681	0.0150647	LIHC
cg00151234	-0.300739	-15.0451	9.37233e-19	3.41046e-13	0.30884	0.0141353	LIHC
cg00191758	-0.354805	-12.2085	1.415e-15	5.149e-10	0.435767	0.0911214	LIHC
cg00213853	-0.229893	-11.5597	8.68004e-15	3.15855e-09	0.277544	0.0382085	LIHC
cg00213957	-0.271594	-10.9787	4.61256e-14	1.67845e-08	0.330075	0.0532673	LIHC
cg00216997	-0.255237	-13.7568	2.31142e-17	8.41095e-12	0.318498	0.0621901	LIHC
cg00230685	-0.348176	-15.2842	5.27794e-19	1.92057e-13	0.367007	0.0237541	LIHC
cg00253811	-0.35287	-12.1319	1.7481e-15	6.36109e-10	0.38	0.0420022	LIHC
cg00260448	-0.0929975	-6.39041	9.82135e-08	0.0357385	0.11252	0.0232912	LIHC
cg00271516	0.211186	9.96825	9.34771e-13	3.4015e-07	0.761321	0.951955	LIHC
cg00279797	-0.222072	-10.2994	3.43664e-13	1.25055e-07	0.260014	0.0451399	LIHC
cg00360298	0.220463	7.94959	5.52989e-10	0.000201225	0.666361	0.879605	LIHC
cg00368230	-0.254539	-13.0926	1.30224e-16	4.73868e-11	0.265922	0.020029	LIHC
cg00369058	0.315062	12.1102	1.85622e-15	6.75452e-10	0.583076	0.888451	LIHC
cg00375105	-0.231424	-8.25097	2.0732e-10	7.5441e-05	0.238518	0.0197143	LIHC
cg00379371	-0.0972995	-6.6574	4.01339e-08	0.0146042	0.120632	0.0235158	LIHC
cg00382651	-0.156457	-6.93238	1.59999e-08	0.00582215	0.191978	0.0373082	LIHC
cg00389276	0.262788	6.66761	3.87856e-08	0.0141135	0.613998	0.814668	LIHC
cg00428012	-0.300192	-17.4593	3.73887e-21	1.36052e-15	0.353495	0.0491259	LIHC
cg00428314	-0.370154	-16.0854	8.05604e-20	2.93148e-14	0.414779	0.047371	LIHC
cg00433220	-0.308955	-12.9604	1.84921e-16	6.72903e-11	0.363919	0.0634398	LIHC
cg00481999	-0.13928	-9.23066	9.11956e-12	3.31848e-06	0.163578	0.0277029	LIHC
cg00581583	-0.20543	-12.9053	2.14147e-16	7.79251e-11	0.234427	0.0318671	LIHC
cg00604086	-0.36446	-32.9614	3.47187e-32	1.26337e-26	0.391393	0.0359719	LIHC
cg00607036	-0.282261	-14.4198	4.3366e-18	1.57803e-12	0.331135	0.0529869	LIHC
cg00618396	-0.273534	-15.2286	6.0287e-19	2.19376e-13	0.30408	0.0253669	LIHC
cg00623388	-0.401872	-16.1083	7.64401e-20	2.78155e-14	0.431373	0.0246842	LIHC
cg00627024	-0.153311	-11.9217	3.13432e-15	1.14053e-09	0.177308	0.0200134	LIHC
cg00634642	-0.335438	-13.2575	8.4361e-17	3.06978e-11	0.364896	0.0324769	LIHC
cg00667781	-0.345453	-11.5088	1.00296e-14	3.64963e-09	0.361636	0.0363199	LIHC
cg00679726	-0.253303	-6.7968	2.51709e-08	0.00915935	0.615661	0.305732	LIHC
cg00723034	-0.174933	-10.1397	5.55897e-13	2.02283e-07	0.18484	0.0131965	LIHC
cg00725912	-0.151749	-6.42133	8.85375e-08	0.0322176	0.202582	0.0261631	LIHC
cg00739787	-0.357164	-10.9119	5.60493e-14	2.03956e-08	0.396119	0.0561317	LIHC
cg00742240	0.146359	7.01057	1.23249e-08	0.00448487	0.81639	0.948514	LIHC
cg00743068	-0.183541	-9.97491	9.16017e-13	3.33326e-07	0.208086	0.0335726	LIHC
cg00763315	0.167337	9.49125	4.04716e-12	1.47271e-06	0.794412	0.952842	LIHC
cg00775115	-0.289963	-11.745	5.14175e-15	1.87101e-09	0.348831	0.0627837	LIHC
cg00790086	-0.359515	-20.7872	4.46042e-24	1.62309e-18	0.371555	0.0191985	LIHC
cg00799224	-0.221478	-10.4736	2.0421e-13	7.43091e-08	0.254512	0.0408893	LIHC
cg00805116	-0.257626	-7.77533	9.78843e-10	0.000356187	0.290266	0.0328592	LIHC
cg00813142	-0.305281	-10.9506	5.00601e-14	1.82162e-08	0.370084	0.0564921	LIHC
cg00816548	-0.206468	-8.53094	8.40086e-11	3.05695e-05	0.265734	0.069424	LIHC
cg00823357	-0.247021	-11.0693	3.54443e-14	1.28977e-08	0.290777	0.046068	LIHC
cg00829575	-0.336888	-13.8538	1.80377e-17	6.56366e-12	0.361683	0.0391671	LIHC
cg00834229	-0.344118	-11.2605	2.04065e-14	7.42565e-09	0.376919	0.0394357	LIHC
cg00878023	-0.446011	-11.3246	1.69753e-14	6.17707e-09	0.51671	0.0758107	LIHC
cg00881557	-0.140408	-6.93089	1.60793e-08	0.00585102	0.183886	0.046291	LIHC
cg00901211	-0.263318	-13.8126	2.00392e-17	7.29197e-12	0.298975	0.0438165	LIHC
cg00909097	0.260547	7.90312	6.43772e-10	0.00023426	0.695025	0.908251	LIHC
cg00909388	0.195512	7.27791	5.06213e-09	0.00184204	0.727334	0.905116	LIHC
cg00914218	-0.332405	-14.9807	1.09504e-18	3.98471e-13	0.368621	0.0443161	LIHC
cg00920537	-0.248056	-12.2714	1.19025e-15	4.33114e-10	0.279618	0.0394039	LIHC
cg00920960	-0.166088	-7.59191	1.79027e-09	0.000651453	0.207441	0.030929	LIHC
cg00926894	-0.192293	-6.46586	7.62582e-08	0.0277493	0.356925	0.147506	LIHC
cg00935394	-0.131533	-10.0603	7.06846e-13	2.57212e-07	0.171891	0.0396318	LIHC
cg00936342	-0.218491	-13.0775	1.35539e-16	4.93209e-11	0.236949	0.0158093	LIHC
cg00940232	-0.274239	-17.6255	2.6109e-21	9.50069e-16	0.328051	0.0607329	LIHC
cg00963467	-0.400739	-23.4152	3.98207e-26	1.44902e-20	0.418307	0.0229652	LIHC
cg00969573	-0.171701	-8.29487	1.79847e-10	6.54436e-05	0.215773	0.0442813	LIHC
cg00981643	-0.170536	-7.85304	7.58532e-10	0.000276019	0.242242	0.0783725	LIHC
cg00994038	-0.329019	-6.94707	1.52339e-08	0.00554342	0.39882	0.0921939	LIHC
cg01005760	0.201751	7.42405	3.11793e-09	0.00113457	0.738156	0.932248	LIHC
cg01043588	-0.306379	-7.012	1.22661e-08	0.00446347	0.564068	0.26398	LIHC
cg01057599	-0.174392	-7.76186	1.02312e-09	0.000372301	0.190239	0.0419957	LIHC
cg01078706	-0.186275	-6.90487	1.75396e-08	0.00638242	0.308941	0.120045	LIHC
cg01079126	-0.287829	-9.91213	1.10902e-12	4.03558e-07	0.292678	0.0206807	LIHC
cg01080862	-0.391049	-17.6939	2.25398e-21	8.20192e-16	0.424874	0.0437524	LIHC
cg01081720	-0.146726	-7.91804	6.13087e-10	0.000223094	0.265149	0.0978991	LIHC
cg01086868	-0.283924	-11.0363	3.90093e-14	1.41949e-08	0.345644	0.0427301	LIHC
cg01087775	-0.240483	-8.0987	3.3998e-10	0.000123714	0.357352	0.127423	LIHC
cg01098871	-0.282552	-15.3955	4.04792e-19	1.47298e-13	0.317411	0.0304551	LIHC
cg01099541	-0.207337	-7.16014	7.48785e-09	0.00272472	0.280046	0.048715	LIHC
cg01108554	-0.330582	-13.654	3.00995e-17	1.09528e-11	0.356711	0.0305381	LIHC
cg01109660	0.275341	7.03151	1.14935e-08	0.00418232	0.533428	0.801346	LIHC
cg01121830	-0.392977	-19.9016	2.44668e-23	8.90313e-18	0.447019	0.0554223	LIHC
cg01123965	0.343323	6.68639	3.64215e-08	0.0132533	0.581069	0.856743	LIHC
cg01145939	0.234428	7.27372	5.13301e-09	0.00186783	0.716968	0.947792	LIHC
cg01169440	-0.121842	-8.55613	7.74806e-11	2.81941e-05	0.139301	0.0167269	LIHC
cg01172484	-0.231741	-9.28139	7.78059e-12	2.83125e-06	0.24976	0.0341501	LIHC
cg01212677	-0.358499	-18.6569	2.97595e-22	1.0829e-16	0.409626	0.052204	LIHC
cg01241836	-0.305031	-12.1233	1.79008e-15	6.51385e-10	0.331059	0.0392833	LIHC
cg01245531	-0.170411	-8.5664	7.49684e-11	2.72799e-05	0.213826	0.0349745	LIHC
cg01257202	-0.139473	-8.81296	3.41004e-11	1.24086e-05	0.194495	0.0546678	LIHC
cg01286388	-0.205684	-9.76877	1.71936e-12	6.2565e-07	0.238023	0.0379417	LIHC
cg01288367	-0.343691	-14.0205	1.18085e-17	4.29693e-12	0.381776	0.0439169	LIHC
cg01309671	-0.157444	-9.63673	2.5807e-12	9.39081e-07	0.237971	0.0695049	LIHC
cg01314643	-0.173374	-11.3495	1.58018e-14	5.75006e-09	0.195562	0.0240108	LIHC
cg01342901	-0.480491	-22.2289	3.1614e-25	1.15039e-19	0.528699	0.043945	LIHC
cg01345087	-0.370543	-8.20556	2.40218e-10	8.74121e-05	0.409194	0.0876978	LIHC
cg01349336	-0.243348	-7.30508	4.62543e-09	0.00168313	0.50481	0.251886	LIHC
cg01353347	-0.330171	-16.3926	3.98945e-20	1.4517e-14	0.357485	0.0248412	LIHC
cg01372992	-0.163681	-9.67092	2.32267e-12	8.45187e-07	0.191472	0.0379263	LIHC
cg01381545	-0.17843	-8.47321	1.01143e-10	3.68044e-05	0.23953	0.0604621	LIHC
cg01383599	0.204781	10.2946	3.48688e-13	1.26883e-07	0.767674	0.961783	LIHC
cg01384686	-0.421702	-28.1417	2.33603e-29	8.50049e-24	0.443211	0.0324563	LIHC
cg01386236	-0.357832	-12.7705	3.07109e-16	1.11753e-10	0.386156	0.0427923	LIHC
cg01398148	0.180398	7.01233	1.22526e-08	0.00445856	0.778433	0.942481	LIHC
cg01408383	-0.268632	-10.9875	4.49525e-14	1.63576e-08	0.280386	0.0122788	LIHC
cg01410230	-0.195621	-9.18797	1.04257e-11	3.79377e-06	0.227051	0.041333	LIHC
cg01415112	-0.229418	-12.2883	1.13649e-15	4.13554e-10	0.282294	0.0522875	LIHC
cg01430241	-0.415945	-20.7036	5.22452e-24	1.90113e-18	0.430254	0.0279362	LIHC
cg01436914	-0.211076	-11.0432	3.82298e-14	1.39113e-08	0.246404	0.0371657	LIHC
cg01445307	-0.29336	-13.1009	1.27411e-16	4.63631e-11	0.312468	0.022559	LIHC
cg01461762	-0.329796	-14.7889	1.74638e-18	6.35485e-13	0.345664	0.0212524	LIHC
cg01462040	-0.231414	-8.17657	2.63926e-10	9.6039e-05	0.269126	0.0599634	LIHC
cg01466335	0.202004	7.45451	2.81894e-09	0.00102577	0.701935	0.888593	LIHC
cg01479413	-0.301483	-9.89351	1.17384e-12	4.27146e-07	0.353391	0.0671033	LIHC
cg01486020	-0.273222	-6.64907	4.12706e-08	0.0150178	0.332715	0.0906382	LIHC
cg01488378	-0.273142	-11.9186	3.16162e-15	1.15047e-09	0.282358	0.033401	LIHC
cg01528835	0.212126	7.72168	1.16756e-09	0.000424859	0.746726	0.952754	LIHC
cg01537968	-0.276748	-11.2905	1.87162e-14	6.81058e-09	0.29747	0.0290644	LIHC
cg01540386	-0.195423	-7.00659	1.24896e-08	0.0045448	0.207878	0.0313888	LIHC
cg01556010	-0.31618	-14.6949	2.19845e-18	7.99985e-13	0.358844	0.047895	LIHC
cg01564045	0.188188	7.12099	8.53018e-09	0.00310401	0.78237	0.938077	LIHC
cg01564693	0.162031	6.29546	1.35044e-07	0.0491406	0.815782	0.965118	LIHC
cg01567000	-0.134995	-9.77367	1.69371e-12	6.16316e-07	0.159145	0.0278012	LIHC
cg01579322	-0.368382	-30.0275	1.63291e-30	5.94193e-25	0.395921	0.0349465	LIHC
cg01581349	0.177517	6.90179	1.77205e-08	0.00644824	0.78639	0.963341	LIHC
cg01589255	-0.295987	-18.0895	9.71245e-22	3.53422e-16	0.324089	0.0285641	LIHC
cg01592490	0.23959	6.94623	1.52768e-08	0.005559	0.731601	0.936228	LIHC
cg01669374	-0.347033	-13.4386	5.25667e-17	1.91283e-11	0.379316	0.0452326	LIHC
cg01673753	0.256813	10.0504	7.28326e-13	2.65028e-07	0.682498	0.917593	LIHC
cg01674874	0.27987	7.69794	1.26239e-09	0.000459365	0.572115	0.803621	LIHC
cg01683788	-0.21035	-8.33675	1.57062e-10	5.71527e-05	0.245206	0.0309731	LIHC
cg01716666	-0.314501	-15.2642	5.53591e-19	2.01444e-13	0.332002	0.0179118	LIHC
cg01733439	-0.503107	-22.3607	2.49964e-25	9.09583e-20	0.542082	0.0559247	LIHC
cg01747155	-0.181012	-12.1277	1.76835e-15	6.43477e-10	0.188712	0.00793872	LIHC
cg01752898	-0.222863	-9.52642	3.62921e-12	1.32062e-06	0.260577	0.0375381	LIHC
cg01756638	-0.263895	-9.95421	9.75587e-13	3.55003e-07	0.312932	0.0445234	LIHC
cg01771673	-0.318566	-14.3419	5.26518e-18	1.91593e-12	0.331781	0.0285607	LIHC
cg01780361	-0.229256	-12.3516	9.55319e-16	3.47627e-10	0.278137	0.0427577	LIHC
cg01826283	-0.133065	-9.64383	2.52489e-12	9.18774e-07	0.169342	0.0458862	LIHC
cg01851385	-0.114253	-7.67885	1.34426e-09	0.000489158	0.215525	0.0947305	LIHC
cg01855997	-0.345585	-15.0525	9.20656e-19	3.35014e-13	0.37956	0.0302143	LIHC
cg01884384	-0.266534	-14.6402	2.51463e-18	9.1504e-13	0.302551	0.0312447	LIHC
cg01885202	-0.306413	-15.0592	9.05897e-19	3.29643e-13	0.317942	0.023634	LIHC
cg01887353	-0.230239	-12.2286	1.33908e-15	4.87274e-10	0.259484	0.0256156	LIHC
cg01892695	0.19879	6.88079	1.90089e-08	0.00691706	0.756783	0.930519	LIHC
cg01910452	-0.304769	-12.5659	5.33116e-16	1.93994e-10	0.311005	0.0163529	LIHC
cg01927625	0.208016	7.16312	7.41401e-09	0.00269786	0.737539	0.930992	LIHC
cg02012821	-0.357899	-10.7962	7.86654e-14	2.86252e-08	0.392902	0.0471425	LIHC
cg02014085	0.216133	8.48889	9.61663e-11	3.49936e-05	0.728917	0.918498	LIHC
cg02019068	0.151594	7.87405	7.08073e-10	0.000257658	0.825103	0.965024	LIHC
cg02025065	-0.227425	-12.166	1.59093e-15	5.78919e-10	0.234765	0.0164764	LIHC
cg02041067	-0.280637	-9.99948	8.50078e-13	3.09332e-07	0.422823	0.135989	LIHC
cg02061213	-0.239467	-8.20708	2.39033e-10	8.69809e-05	0.374528	0.11935	LIHC
cg02095995	-0.367537	-7.51319	2.32168e-09	0.000844825	0.43773	0.0967296	LIHC
cg02116333	-0.376786	-15.449	3.56492e-19	1.29723e-13	0.393348	0.0230641	LIHC
cg02117996	-0.322339	-14.0807	1.01404e-17	3.68997e-12	0.33574	0.036979	LIHC
cg02120013	-0.323112	-9.89834	1.15667e-12	4.20897e-07	0.394413	0.0574394	LIHC
cg02124085	0.247167	9.64555	2.51151e-12	9.13903e-07	0.731511	0.961808	LIHC
cg02129889	-0.249295	-15.1621	7.07111e-19	2.57308e-13	0.268175	0.0154013	LIHC
cg02148711	-0.361232	-18.8978	1.8166e-22	6.61036e-17	0.375661	0.0234266	LIHC
cg02154531	0.110659	6.415	9.04395e-08	0.0329097	0.856965	0.955226	LIHC
cg02155838	-0.128311	-7.65758	1.44181e-09	0.000524655	0.187935	0.0502836	LIHC
cg02165720	-0.360441	-18.7458	2.47879e-22	9.01996e-17	0.365776	0.0168546	LIHC
cg02179880	-0.387078	-10.0553	7.17714e-13	2.61166e-07	0.405096	0.0495748	LIHC
cg02212907	0.200874	8.00111	4.67318e-10	0.00017005	0.796982	0.974775	LIHC
cg02213813	-0.329193	-13.0473	1.468e-16	5.34185e-11	0.367077	0.0274515	LIHC
cg02232536	-0.331432	-13.4645	4.9143e-17	1.78825e-11	0.370472	0.0326886	LIHC
cg02264182	-0.370375	-16.5755	2.63716e-20	9.59624e-15	0.436969	0.0692412	LIHC
cg02264284	-0.244106	-8.67936	5.22134e-11	1.89997e-05	0.294858	0.0463469	LIHC
cg02265919	-0.176306	-10.3447	3.00061e-13	1.09188e-07	0.202711	0.0211468	LIHC
cg02283106	-0.268441	-7.65746	1.44236e-09	0.000524855	0.315768	0.0502633	LIHC
cg02311013	0.168973	7.31137	4.52992e-09	0.00164838	0.788014	0.957386	LIHC
cg02318959	-0.219881	-10.819	7.35691e-14	2.67708e-08	0.21586	0.011284	LIHC
cg02326006	-0.117751	-8.01774	4.42633e-10	0.000161068	0.136961	0.0161625	LIHC
cg02433685	-0.204376	-7.91214	6.25056e-10	0.000227449	0.339041	0.11406	LIHC
cg02454309	-0.108353	-9.39851	5.39891e-12	1.96459e-06	0.122585	0.0153789	LIHC
cg02492740	-0.191933	-9.08307	1.45e-11	5.27633e-06	0.236613	0.045079	LIHC
cg02497062	-0.0989298	-7.35368	3.9367e-09	0.00143251	0.155717	0.0630195	LIHC
cg02501924	-0.21077	-12.3394	9.87952e-16	3.59502e-10	0.222032	0.0193273	LIHC
cg02512611	0.23475	6.40771	9.26755e-08	0.0337233	0.648015	0.851765	LIHC
cg02523105	-0.143893	-11.4433	1.20868e-14	4.39822e-09	0.15719	0.0188542	LIHC
cg02559685	-0.382157	-10.9557	4.93234e-14	1.79481e-08	0.415392	0.0473197	LIHC
cg02573613	-0.354423	-17.7206	2.12847e-21	7.74519e-16	0.389671	0.0456673	LIHC
cg02581727	-0.188343	-10.1253	5.80569e-13	2.11261e-07	0.209808	0.0254606	LIHC
cg02634916	-0.254069	-14.5991	2.78243e-18	1.01249e-12	0.278096	0.0228706	LIHC
cg02647401	-0.2721	-16.4891	3.20528e-20	1.16636e-14	0.323493	0.0540633	LIHC
cg02649608	-0.317731	-20.5683	6.7553e-24	2.45816e-18	0.339383	0.0332039	LIHC
cg02698615	-0.244461	-11.8639	3.68312e-15	1.34024e-09	0.265053	0.0203337	LIHC
cg02734755	-0.236563	-9.84816	1.34826e-12	4.90613e-07	0.232977	0.00971853	LIHC
cg02742139	-0.166358	-11.2664	2.00586e-14	7.29906e-09	0.204742	0.0385649	LIHC
cg02779729	0.217236	8.03099	4.23914e-10	0.000154256	0.700996	0.920465	LIHC
cg02799972	-0.233803	-6.96298	1.4446e-08	0.00525671	0.292381	0.0405428	LIHC
cg02804166	-0.207727	-12.78	2.99333e-16	1.08923e-10	0.228583	0.028921	LIHC
cg02835735	0.151047	6.3931	9.733e-08	0.035417	0.807627	0.939746	LIHC
cg02853686	-0.126047	-6.78152	2.6491e-08	0.0096397	0.149815	0.0201639	LIHC
cg02856792	-0.286152	-11.8579	3.74629e-15	1.36322e-09	0.335189	0.0575408	LIHC
cg02857405	0.175699	7.26603	5.26578e-09	0.00191614	0.823693	0.971239	LIHC
cg02871887	-0.340499	-18.9254	1.71723e-22	6.24877e-17	0.356968	0.0206377	LIHC
cg02881531	0.244739	8.52048	8.68786e-11	3.16139e-05	0.697795	0.942062	LIHC
cg02902015	-0.359807	-16.4204	3.74561e-20	1.36298e-14	0.377383	0.0234525	LIHC
cg02931660	0.208318	6.78895	2.58401e-08	0.00940286	0.747137	0.914979	LIHC
cg02934281	-0.19013	-8.58082	7.15795e-11	2.60468e-05	0.225217	0.0358763	LIHC
cg02940028	-0.21076	-9.08081	1.46035e-11	5.314e-06	0.255741	0.0441704	LIHC
cg02944422	-0.270725	-8.77935	3.79519e-11	1.38102e-05	0.3034	0.0366396	LIHC
cg02973971	-0.275092	-16.278	5.17933e-20	1.88468e-14	0.317014	0.0368433	LIHC
cg02977829	0.0545129	7.07109	1.00729e-08	0.0036654	0.862009	0.912384	LIHC
cg03003036	0.183768	8.50736	9.06212e-11	3.29758e-05	0.788823	0.953721	LIHC
cg03010388	-0.297105	-9.0879	1.42809e-11	5.19663e-06	0.343579	0.05026	LIHC
cg03019024	-0.294873	-9.5623	3.24774e-12	1.18181e-06	0.309634	0.0252586	LIHC
cg03025340	0.257243	7.70938	1.21575e-09	0.000442396	0.679579	0.911588	LIHC
cg03026311	-0.326887	-11.5817	8.15555e-15	2.96769e-09	0.376254	0.0496612	LIHC
cg03028851	0.215979	7.08596	9.58582e-09	0.00348815	0.765053	0.961963	LIHC
cg03038395	-0.364943	-7.56272	1.97131e-09	0.000717332	0.497519	0.184929	LIHC
cg03039483	-0.150616	-9.86099	1.29643e-12	4.71751e-07	0.18011	0.0320206	LIHC
cg03040210	-0.216211	-11.351	1.57381e-14	5.72688e-09	0.240569	0.0250428	LIHC
cg03046946	-0.141718	-7.94946	5.53227e-10	0.000201312	0.155681	0.0153975	LIHC
cg03056849	-0.313283	-17.7441	2.02399e-21	7.36501e-16	0.330614	0.024649	LIHC
cg03057808	-0.290777	-16.0213	9.34015e-20	3.39875e-14	0.312866	0.0304814	LIHC
cg03096488	-0.149762	-6.49139	7.00028e-08	0.025473	0.23209	0.0533473	LIHC
cg03122511	-0.164601	-9.9721	9.23884e-13	3.36188e-07	0.217158	0.0505389	LIHC
cg03147775	-0.264357	-11.7895	4.53785e-15	1.65126e-09	0.278873	0.0202619	LIHC
cg03157806	-0.335268	-17.3588	4.65135e-21	1.69256e-15	0.374051	0.0380087	LIHC
cg03161453	0.26647	13.6473	3.06217e-17	1.11428e-11	0.709871	0.951726	LIHC
cg03164831	-0.219116	-8.48364	9.78033e-11	3.55892e-05	0.225976	0.0212432	LIHC
cg03181214	-0.18554	-12.0501	2.19231e-15	7.97752e-10	0.231085	0.0424142	LIHC
cg03191359	-0.385995	-14.99	1.07086e-18	3.89672e-13	0.448785	0.0658864	LIHC
cg03210912	-0.343776	-17.2691	5.65651e-21	2.05832e-15	0.375782	0.0367862	LIHC
cg03250346	-0.396725	-19.5585	4.81022e-23	1.75037e-17	0.45097	0.0724063	LIHC
cg03266942	-0.11338	-9.80436	1.54165e-12	5.60986e-07	0.143949	0.036812	LIHC
cg03267527	-0.139732	-7.0166	1.20794e-08	0.00439551	0.202725	0.0561626	LIHC
cg03273606	-0.226003	-10.059	7.09651e-13	2.58232e-07	0.24217	0.0237907	LIHC
cg03305185	0.187823	6.87994	1.90627e-08	0.00693664	0.566442	0.758705	LIHC
cg03319489	-0.355129	-13.6747	2.85379e-17	1.03846e-11	0.36306	0.033185	LIHC
cg03321558	0.27193	8.18514	2.56676e-10	9.34009e-05	0.62657	0.888193	LIHC
cg03372815	-0.412291	-15.3237	4.80308e-19	1.74777e-13	0.448013	0.0376151	LIHC
cg03422380	-0.230093	-11.2133	2.33731e-14	8.50515e-09	0.246188	0.0194441	LIHC
cg03426344	-0.288443	-9.02058	1.76587e-11	6.42574e-06	0.471125	0.158974	LIHC
cg03460558	-0.362006	-20.5636	6.81563e-24	2.48011e-18	0.396157	0.0375104	LIHC
cg03464416	-0.25443	-8.92932	2.35684e-11	8.57621e-06	0.29976	0.0553907	LIHC
cg03470745	-0.253629	-8.58336	7.0999e-11	2.58356e-05	0.372713	0.106806	LIHC
cg03487706	-0.380246	-17.6207	2.63814e-21	9.59982e-16	0.387212	0.0143245	LIHC
cg03512439	0.175085	8.24435	2.11819e-10	7.7078e-05	0.751191	0.900306	LIHC
cg03537243	-0.263576	-8.64436	5.83977e-11	2.12501e-05	0.347271	0.0719902	LIHC
cg03575468	-0.138494	-6.81232	2.38979e-08	0.00869612	0.24633	0.110755	LIHC
cg03595428	-0.32395	-11.6294	7.12522e-15	2.59277e-09	0.353518	0.0222297	LIHC
cg03659012	-0.260526	-9.5808	3.06719e-12	1.11611e-06	0.270731	0.0216974	LIHC
cg03661529	-0.235689	-10.9627	4.8324e-14	1.75844e-08	0.2553	0.0308833	LIHC
cg03662899	0.214952	6.65737	4.01382e-08	0.0146057	0.688634	0.906651	LIHC
cg03671371	-0.3899	-8.94998	2.20754e-11	8.03293e-06	0.561314	0.108677	LIHC
cg03672021	-0.138105	-7.7492	1.06656e-09	0.000388107	0.197488	0.0474565	LIHC
cg03688409	-0.255853	-10.6899	1.07545e-13	3.91341e-08	0.290238	0.0225298	LIHC
cg03692134	-0.276003	-15.765	1.69432e-19	6.1654e-14	0.338951	0.0703351	LIHC
cg03692228	-0.200376	-10.214	4.4433e-13	1.61685e-07	0.243545	0.0370636	LIHC
cg03711046	-0.248423	-12.7452	3.28674e-16	1.196e-10	0.308943	0.0695771	LIHC
cg03718309	-0.304371	-13.9086	1.5686e-17	5.70791e-12	0.463492	0.159949	LIHC
cg03732411	-0.246686	-11.6812	6.15462e-15	2.23958e-09	0.273199	0.0329646	LIHC
cg03733831	0.341752	9.28513	7.69017e-12	2.79834e-06	0.572395	0.857511	LIHC
cg03735049	-0.133182	-7.18798	6.82553e-09	0.00248372	0.181431	0.0419648	LIHC
cg03742148	-0.313879	-10.1299	5.7257e-13	2.0835e-07	0.372421	0.0627204	LIHC
cg03753451	-0.273434	-10.9953	4.39502e-14	1.59928e-08	0.302814	0.0283613	LIHC
cg03765898	0.279954	8.7712	3.89498e-11	1.41733e-05	0.65035	0.911165	LIHC
cg03768687	-0.22499	-12.9465	1.91858e-16	6.98145e-11	0.241921	0.0190663	LIHC
cg03773146	-0.477176	-26.4988	2.71309e-28	9.87255e-23	0.498406	0.0284227	LIHC
cg03787796	-0.124027	-8.63348	6.04674e-11	2.20032e-05	0.191629	0.0716813	LIHC
cg03791434	0.138776	7.53808	2.13844e-09	0.000778149	0.825424	0.959367	LIHC
cg03805048	-0.153357	-6.97186	1.40242e-08	0.00510323	0.204162	0.0646626	LIHC
cg03817616	-0.0468035	-7.28436	4.9548e-09	0.00180298	0.0762808	0.0352826	LIHC
cg03823092	-0.222469	-11.3568	1.54781e-14	5.63226e-09	0.248255	0.0255454	LIHC
cg03840091	0.204305	7.7599	1.02973e-09	0.000374706	0.720279	0.916843	LIHC
cg03845409	-0.140073	-6.79674	2.51761e-08	0.00916124	0.189157	0.05935	LIHC
cg03858262	-0.309838	-17.4788	3.5838e-21	1.3041e-15	0.362383	0.0476526	LIHC
cg03927113	-0.0786105	-8.80349	3.51438e-11	1.27883e-05	0.112518	0.0363997	LIHC
cg03939693	-0.285238	-11.2517	2.09257e-14	7.61457e-09	0.297459	0.0322485	LIHC
cg03941517	-0.306256	-12.3486	9.63359e-16	3.50553e-10	0.332502	0.0325503	LIHC
cg03946442	-0.38336	-22.9663	8.62749e-26	3.13942e-20	0.407328	0.0311818	LIHC
cg03959079	0.271559	9.83837	1.38924e-12	5.05525e-07	0.624128	0.881818	LIHC
cg03992069	-0.318079	-15.6916	2.01202e-19	7.32147e-14	0.357628	0.0330177	LIHC
cg03993368	-0.343428	-14.8296	1.58123e-18	5.75386e-13	0.362187	0.0220068	LIHC
cg03995238	-0.269279	-14.3589	5.04668e-18	1.83642e-12	0.400301	0.121637	LIHC
cg04025582	-0.287911	-9.66976	2.33095e-12	8.48201e-07	0.323659	0.0332478	LIHC
cg04044694	-0.159102	-6.4892	7.05171e-08	0.0256602	0.180659	0.0196195	LIHC
cg04051266	-0.187541	-9.09178	1.41072e-11	5.1334e-06	0.201013	0.0164786	LIHC
cg04058675	0.175963	7.09479	9.30791e-09	0.00338702	0.739011	0.892688	LIHC
cg04059198	-0.398717	-16.02	9.36899e-20	3.40925e-14	0.429677	0.0345484	LIHC
cg04069311	0.167904	6.44102	8.28809e-08	0.0301592	0.783237	0.934745	LIHC
cg04101819	0.12715	7.93195	5.85831e-10	0.000213176	0.855831	0.966433	LIHC
cg04137897	0.189157	12.9308	2.0005e-16	7.27954e-11	0.766231	0.939224	LIHC
cg04183498	-0.283704	-14.0844	1.00466e-17	3.6558e-12	0.307703	0.0153515	LIHC
cg04189697	0.225925	7.06224	1.03742e-08	0.00377503	0.726226	0.92627	LIHC
cg04238548	-0.299699	-15.3945	4.05729e-19	1.47639e-13	0.324455	0.032472	LIHC
cg04241572	-0.286557	-14.9638	1.14097e-18	4.15184e-13	0.303746	0.0286881	LIHC
cg04283377	-0.147977	-8.50776	9.05052e-11	3.29336e-05	0.174065	0.0320459	LIHC
cg04297329	-0.252111	-11.7993	4.41419e-15	1.60626e-09	0.299059	0.0554678	LIHC
cg04300278	-0.359861	-13.2152	9.42776e-17	3.43063e-11	0.442712	0.0722974	LIHC
cg04302192	-0.137474	-8.25093	2.07345e-10	7.54501e-05	0.158615	0.0357922	LIHC
cg04334684	-0.252333	-12.9953	1.68546e-16	6.13315e-11	0.290769	0.0419068	LIHC
cg04368919	-0.218754	-9.11234	1.32232e-11	4.81172e-06	0.236936	0.0241638	LIHC
cg04369555	-0.303202	-15.4153	3.86226e-19	1.40542e-13	0.330104	0.0335357	LIHC
cg04381495	0.157248	6.63001	4.39914e-08	0.0160078	0.783523	0.912914	LIHC
cg04392694	0.222341	8.38236	1.35548e-10	4.93241e-05	0.664263	0.852715	LIHC
cg04397441	-0.153382	-9.40557	5.28161e-12	1.92191e-06	0.176503	0.0288585	LIHC
cg04399994	-0.30321	-6.29516	1.35179e-07	0.0491898	0.42086	0.139837	LIHC
cg04455030	-0.113737	-6.55481	5.65965e-08	0.0205947	0.144694	0.0256436	LIHC
cg04455999	-0.276711	-6.48598	7.12831e-08	0.0259389	0.412639	0.159821	LIHC
cg04464742	-0.217131	-8.48145	9.84935e-11	3.58404e-05	0.255294	0.0262079	LIHC
cg04476849	-0.205154	-7.14014	8.00331e-09	0.00291229	0.276266	0.085867	LIHC
cg04491396	-0.356813	-16.798	1.60115e-20	5.82636e-15	0.362854	0.0218824	LIHC
cg04493740	-0.248408	-13.7872	2.13806e-17	7.78009e-12	0.269099	0.0161907	LIHC
cg04528545	-0.315259	-11.1285	2.98588e-14	1.08652e-08	0.44718	0.143289	LIHC
cg04575501	-0.407352	-17.4569	3.75822e-21	1.36756e-15	0.462623	0.072359	LIHC
cg04581892	0.199493	6.29107	1.37047e-07	0.0498696	0.730183	0.921059	LIHC
cg04586456	-0.403364	-17.6744	2.35016e-21	8.5519e-16	0.414481	0.0227921	LIHC
cg04596655	-0.357327	-12.5553	5.48593e-16	1.99625e-10	0.383799	0.0295336	LIHC
cg04599817	-0.193358	-7.84133	7.88229e-10	0.000286826	0.237238	0.0420009	LIHC
cg04602218	-0.282629	-11.5819	8.14962e-15	2.96553e-09	0.330026	0.0497714	LIHC
cg04653083	-0.262092	-13.7138	2.58125e-17	9.39282e-12	0.27801	0.0262896	LIHC
cg04675170	-0.208791	-9.89245	1.17766e-12	4.28533e-07	0.257863	0.0477479	LIHC
cg04675306	-0.30096	-12.3659	9.18734e-16	3.34314e-10	0.341888	0.0410562	LIHC
cg04690567	0.256364	6.66426	3.9223e-08	0.0142727	0.562084	0.803501	LIHC
cg04700060	-0.235069	-12.1054	1.88128e-15	6.8457e-10	0.270756	0.0337714	LIHC
cg04703500	-0.202103	-9.60833	2.81708e-12	1.02509e-06	0.238252	0.0375255	LIHC
cg04740028	-0.2782	-15.0252	9.83304e-19	3.57811e-13	0.325373	0.0347133	LIHC
cg04743474	-0.177684	-8.16113	2.77499e-10	0.000100978	0.225738	0.0439298	LIHC
cg04745408	-0.251959	-9.77451	1.68936e-12	6.14734e-07	0.319135	0.0685972	LIHC
cg04746792	-0.27271	-12.9441	1.93104e-16	7.02677e-11	0.287828	0.0169246	LIHC
cg04747879	-0.255388	-15.3573	4.4327e-19	1.613e-13	0.289265	0.0379879	LIHC
cg04769268	-0.37919	-23.2553	5.23708e-26	1.9057e-20	0.435691	0.0627649	LIHC
cg04777103	-0.0631565	-7.70769	1.22255e-09	0.00044487	0.100137	0.0424216	LIHC
cg04782269	-0.190109	-7.53854	2.13514e-09	0.000776949	0.218862	0.0353666	LIHC
cg04784122	-0.341617	-12.924	2.03716e-16	7.41294e-11	0.368941	0.0234026	LIHC
cg04787237	-0.313685	-15.3018	5.06038e-19	1.8414e-13	0.334249	0.0296473	LIHC
cg04791287	-0.202171	-7.60934	1.69025e-09	0.00061506	0.254818	0.0577085	LIHC
cg04812084	0.258764	7.54029	2.12288e-09	0.000772488	0.699148	0.941916	LIHC
cg04817724	-0.264641	-7.0017	1.2695e-08	0.00461953	0.379623	0.0923521	LIHC
cg04821091	-0.230268	-14.5123	3.44769e-18	1.25457e-12	0.245275	0.0225451	LIHC
cg04828704	-0.346964	-15.599	2.50127e-19	9.10178e-14	0.37408	0.0278997	LIHC
cg04861259	0.180066	7.36081	3.84473e-09	0.00139904	0.782461	0.948249	LIHC
cg04882894	-0.132872	-6.79316	2.54791e-08	0.0092715	0.167147	0.0257757	LIHC
cg04889508	-0.153301	-6.40421	9.37719e-08	0.0341223	0.17049	0.0210166	LIHC
cg04907664	-0.382487	-14.2881	6.02207e-18	2.19135e-12	0.423011	0.0376981	LIHC
cg04924696	-0.367661	-14.2562	6.52177e-18	2.37318e-12	0.38216	0.0279701	LIHC
cg04926827	-0.300328	-11.4999	1.02877e-14	3.74356e-09	0.347745	0.0356814	LIHC
cg04944936	-0.325091	-15.4951	3.19684e-19	1.16328e-13	0.338093	0.0178805	LIHC
cg04967538	-0.319101	-11.6219	7.27705e-15	2.64802e-09	0.375305	0.0644165	LIHC
cg04992335	-0.226001	-6.85646	2.06185e-08	0.00750279	0.257198	0.03853	LIHC
cg05019001	-0.242742	-15.0996	8.2168e-19	2.98998e-13	0.254507	0.0171519	LIHC
cg05034175	-0.433971	-12.7678	3.09324e-16	1.12559e-10	0.464699	0.0446678	LIHC
cg05047811	-0.270251	-9.36167	6.05551e-12	2.20352e-06	0.267588	0.0161955	LIHC
cg05073171	-0.203902	-10.2591	3.87906e-13	1.41153e-07	0.25378	0.0369461	LIHC
cg05074623	-0.208608	-13.7702	2.23359e-17	8.12772e-12	0.281619	0.0736583	LIHC
cg05083020	-0.163146	-6.68426	3.66824e-08	0.0133482	0.208686	0.0425118	LIHC
cg05093881	0.202183	6.59687	4.91563e-08	0.0178873	0.746863	0.922026	LIHC
cg05103731	-0.279491	-10.8081	7.59471e-14	2.76361e-08	0.32966	0.0387995	LIHC
cg05116966	-0.332948	-16.0283	9.1913e-20	3.34459e-14	0.379656	0.0472663	LIHC
cg05127037	0.196096	7.9372	5.7584e-10	0.00020954	0.731195	0.903326	LIHC
cg05130312	0.298324	8.30955	1.71499e-10	6.2406e-05	0.588851	0.86344	LIHC
cg05143403	-0.165124	-12.5184	6.06451e-16	2.20679e-10	0.19977	0.030364	LIHC
cg05168419	0.173967	6.43257	8.52642e-08	0.0310265	0.771337	0.91294	LIHC
cg05184076	-0.256662	-10.9634	4.82218e-14	1.75472e-08	0.280052	0.0383066	LIHC
cg05192472	-0.252748	-11.2903	1.8727e-14	6.81448e-09	0.291805	0.0368741	LIHC
cg05193141	0.210683	6.66915	3.85857e-08	0.0140408	0.764996	0.955262	LIHC
cg05204037	-0.283875	-13.2303	9.06108e-17	3.2972e-11	0.33262	0.0446713	LIHC
cg05212419	-0.204522	-9.28614	7.66597e-12	2.78954e-06	0.233893	0.0303405	LIHC
cg05237609	-0.246575	-9.52171	3.68256e-12	1.34003e-06	0.269334	0.0146887	LIHC
cg05257947	-0.465052	-33.0273	3.19602e-32	1.16299e-26	0.503241	0.0508957	LIHC
cg05272837	-0.346979	-15.8545	1.37525e-19	5.00433e-14	0.355858	0.0288687	LIHC
cg05275343	-0.301737	-12.6836	3.87934e-16	1.41164e-10	0.308565	0.016494	LIHC
cg05279113	-0.268405	-9.1366	1.22516e-11	4.4582e-06	0.335119	0.0667252	LIHC
cg05288642	-0.230938	-6.60314	4.81339e-08	0.0175153	0.257467	0.0620025	LIHC
cg05290899	-0.258658	-10.8856	6.05268e-14	2.20249e-08	0.268493	0.0216767	LIHC
cg05305760	-0.374546	-12.8501	2.48152e-16	9.0299e-11	0.409681	0.0360064	LIHC
cg05327750	-0.122888	-7.77534	9.7881e-10	0.000356175	0.140708	0.023213	LIHC
cg05345404	-0.296434	-8.24882	2.08771e-10	7.59687e-05	0.298903	0.0216096	LIHC
cg05363666	-0.142714	-6.51191	6.53492e-08	0.0237796	0.163859	0.0177382	LIHC
cg05392989	-0.237008	-8.53988	8.16312e-11	2.97044e-05	0.286392	0.0446303	LIHC
cg05400670	-0.29117	-10.3818	2.68547e-13	9.77204e-08	0.502376	0.212958	LIHC
cg05407550	0.21337	6.82759	2.27077e-08	0.00826302	0.671606	0.886547	LIHC
cg05418443	-0.322352	-18.5066	4.05969e-22	1.47726e-16	0.332436	0.0181223	LIHC
cg05418506	-0.34787	-15.0543	9.16635e-19	3.33551e-13	0.346722	0.0138103	LIHC
cg05419227	-0.23917	-10.8185	7.36672e-14	2.68064e-08	0.257853	0.0236577	LIHC
cg05422360	-0.141688	-9.71823	2.00802e-12	7.30692e-07	0.151585	0.0191933	LIHC
cg05427163	-0.472708	-22.3276	2.65128e-25	9.64762e-20	0.521543	0.0615021	LIHC
cg05434903	-0.296971	-13.6546	3.00577e-17	1.09376e-11	0.31913	0.0207534	LIHC
cg05444994	-0.302781	-7.02801	1.16285e-08	0.00423147	0.363457	0.0619496	LIHC
cg05445588	0.244094	6.47303	7.44462e-08	0.0270899	0.668779	0.890793	LIHC
cg05453618	0.190201	6.4912	7.00464e-08	0.0254889	0.743023	0.915686	LIHC
cg05462236	-0.185156	-7.71881	1.17863e-09	0.000428887	0.265248	0.0849321	LIHC
cg05494459	-0.147297	-9.2618	8.27228e-12	3.01017e-06	0.170822	0.0273239	LIHC
cg05511138	-0.185835	-6.58245	5.15889e-08	0.0187725	0.253883	0.0675623	LIHC
cg05511752	-0.34648	-14.068	1.04705e-17	3.81007e-12	0.38714	0.0436219	LIHC
cg05512407	0.27872	8.97701	2.02654e-11	7.37431e-06	0.663792	0.913123	LIHC
cg05545272	-0.3237	-11.7378	5.24771e-15	1.90957e-09	0.460443	0.142606	LIHC
cg05558522	-0.185848	-14.9252	1.25295e-18	4.55931e-13	0.198647	0.0194549	LIHC
cg05559023	0.232575	8.13451	3.02581e-10	0.000110105	0.705914	0.914675	LIHC
cg05605944	-0.238924	-7.82352	8.35629e-10	0.000304074	0.406935	0.168779	LIHC
cg05673346	-0.258021	-11.7123	5.63835e-15	2.05172e-09	0.361369	0.092284	LIHC
cg05688478	-0.255254	-11.8549	3.77688e-15	1.37435e-09	0.326874	0.0680327	LIHC
cg05695951	0.23084	7.01546	1.21254e-08	0.00441226	0.674287	0.889086	LIHC
cg05695959	0.242198	9.38024	5.71512e-12	2.07965e-06	0.743059	0.963853	LIHC
cg05699139	-0.177148	-7.65481	1.45504e-09	0.000529469	0.20537	0.0327839	LIHC
cg05707815	-0.287822	-18.916	1.75039e-22	6.36941e-17	0.322589	0.0348056	LIHC
cg05740522	-0.32171	-18.4565	4.50519e-22	1.63938e-16	0.367669	0.0455459	LIHC
cg05782651	-0.191139	-10.2762	3.68479e-13	1.34084e-07	0.236244	0.0461606	LIHC
cg05782975	-0.331981	-12.6807	3.90992e-16	1.42276e-10	0.383521	0.0519263	LIHC
cg05786601	-0.185475	-6.97584	1.3839e-08	0.00503581	0.229154	0.0284026	LIHC
cg05793280	0.163748	6.68887	3.61201e-08	0.0131436	0.80355	0.954517	LIHC
cg05807734	0.219135	8.68396	5.14518e-11	1.87226e-05	0.762245	0.960956	LIHC
cg05832562	-0.175616	-7.43566	3.00034e-09	0.00109178	0.202411	0.0290175	LIHC
cg05861409	-0.263324	-13.5942	3.51223e-17	1.27805e-11	0.297101	0.0363664	LIHC
cg05872808	-0.483777	-22.6635	1.46418e-25	5.32794e-20	0.521571	0.03921	LIHC
cg05889642	-0.334496	-20.7525	4.76274e-24	1.7331e-18	0.378382	0.0453881	LIHC
cg05891083	0.20267	8.49197	9.52177e-11	3.46484e-05	0.7632	0.952609	LIHC
cg05961595	-0.302878	-13.6686	2.89869e-17	1.05479e-11	0.327401	0.0250182	LIHC
cg05965444	-0.260708	-17.2749	5.58472e-21	2.0322e-15	0.285383	0.0294616	LIHC
cg06002470	-0.306276	-8.50868	9.02362e-11	3.28357e-05	0.33583	0.0487678	LIHC
cg06122016	0.231487	7.95113	5.50207e-10	0.000200213	0.700909	0.914124	LIHC
cg06126323	-0.23601	-10.9503	5.01053e-14	1.82326e-08	0.287803	0.0617942	LIHC
cg06134608	0.166213	6.43665	8.41056e-08	0.0306049	0.658094	0.82051	LIHC
cg06140761	0.155614	8.26935	1.95339e-10	7.1081e-05	0.797727	0.930562	LIHC
cg06143713	0.27796	9.43368	4.83949e-12	1.76102e-06	0.605076	0.869109	LIHC
cg06144608	-0.175945	-8.99707	1.90203e-11	6.92121e-06	0.197752	0.0143074	LIHC
cg06149454	-0.282524	-15.2557	5.6493e-19	2.0557e-13	0.300084	0.0133125	LIHC
cg06162422	-0.324964	-12.1267	1.77337e-15	6.45304e-10	0.356625	0.024735	LIHC
cg06163534	0.191126	7.33532	4.18393e-09	0.00152247	0.756896	0.904784	LIHC
cg06269080	-0.338808	-13.7849	2.15062e-17	7.82582e-12	0.360067	0.0240915	LIHC
cg06273903	-0.201102	-10.3854	2.65642e-13	9.66636e-08	0.215768	0.0231461	LIHC
cg06277838	-0.355301	-19.9661	2.1569e-23	7.84867e-18	0.386504	0.043806	LIHC
cg06298361	-0.314059	-12.9407	1.94855e-16	7.09049e-11	0.348255	0.0420978	LIHC
cg06307153	0.203791	8.35452	1.48299e-10	5.39639e-05	0.664533	0.874074	LIHC
cg06323885	-0.280941	-11.0029	4.2992e-14	1.56442e-08	0.285685	0.0219244	LIHC
cg06327799	-0.1475	-8.22983	2.22028e-10	8.07929e-05	0.201416	0.0515721	LIHC
cg06341336	-0.356879	-14.3609	5.02151e-18	1.82726e-12	0.389008	0.0286479	LIHC
cg06363801	-0.388623	-20.3646	9.97296e-24	3.62902e-18	0.395744	0.0183792	LIHC
cg06400167	-0.316598	-9.89513	1.16806e-12	4.2504e-07	0.362837	0.0416796	LIHC
cg06408533	-0.218849	-8.97746	2.02371e-11	7.36399e-06	0.466634	0.251558	LIHC
cg06409934	-0.227934	-8.63618	5.99466e-11	2.18137e-05	0.25598	0.0303008	LIHC
cg06416685	-0.134987	-6.72307	3.22128e-08	0.0117218	0.151291	0.0161252	LIHC
cg06427226	-0.336119	-19.9495	2.22796e-23	8.10723e-18	0.353591	0.0264789	LIHC
cg06438901	-0.249209	-11.5041	1.01641e-14	3.69858e-09	0.275627	0.0270029	LIHC
cg06441867	-0.422597	-8.80117	3.54044e-11	1.28832e-05	0.516894	0.114605	LIHC
cg06457249	0.259513	6.70294	3.44586e-08	0.012539	0.64684	0.895558	LIHC
cg06468442	-0.233297	-9.83861	1.38823e-12	5.05158e-07	0.269546	0.0430314	LIHC
cg06475150	-0.382582	-17.7503	1.99719e-21	7.26748e-16	0.386036	0.0217441	LIHC
cg06489418	-0.397208	-18.6762	2.85993e-22	1.04069e-16	0.425158	0.0216188	LIHC
cg06505213	-0.290865	-16.3641	4.2571e-20	1.5491e-14	0.30782	0.0193596	LIHC
cg06513359	-0.343741	-20.8228	4.17068e-24	1.51765e-18	0.357225	0.0222856	LIHC
cg06549249	-0.372475	-22.3583	2.51051e-25	9.13541e-20	0.378606	0.0157235	LIHC
cg06558952	-0.381346	-18.2999	6.24369e-22	2.27199e-16	0.417161	0.0369075	LIHC
cg06619487	-0.199565	-8.53119	8.39411e-11	3.0545e-05	0.224554	0.0473402	LIHC
cg06620254	-0.360261	-17.7978	1.80431e-21	6.56565e-16	0.370283	0.0189826	LIHC
cg06620299	-0.305527	-13.5818	3.62601e-17	1.31946e-11	0.376942	0.0580782	LIHC
cg06645047	-0.270797	-17.817	1.73188e-21	6.30209e-16	0.293247	0.0287406	LIHC
cg06657741	-0.234642	-10.4516	2.18044e-13	7.93431e-08	0.257411	0.0270059	LIHC
cg06659128	-0.185776	-11.6917	5.97534e-15	2.17434e-09	0.240713	0.0588648	LIHC
cg06666117	0.164583	7.26388	5.30362e-09	0.00192991	0.825031	0.971954	LIHC
cg06675660	-0.388142	-24.0802	1.29638e-26	4.71733e-21	0.404973	0.0202368	LIHC
cg06731599	-0.276401	-14.6635	2.37421e-18	8.63943e-13	0.31067	0.033129	LIHC
cg06742180	0.188807	9.26454	8.20169e-12	2.98448e-06	0.78252	0.949176	LIHC
cg06772067	-0.229742	-14.8738	1.4197e-18	5.1661e-13	0.240236	0.0121029	LIHC
cg06776257	-0.404127	-29.6194	2.86638e-30	1.04303e-24	0.436364	0.0378129	LIHC
cg06818142	-0.219962	-14.7886	1.74742e-18	6.35861e-13	0.264398	0.0465362	LIHC
cg06822229	-0.417892	-6.77317	2.7241e-08	0.00991261	0.515817	0.147553	LIHC
cg06908232	-0.223182	-13.2314	9.03434e-17	3.28747e-11	0.273594	0.0552887	LIHC
cg06919398	-0.402561	-13.9549	1.39426e-17	5.07353e-12	0.424884	0.0329684	LIHC
cg06921685	-0.193905	-10.9775	4.62913e-14	1.68448e-08	0.215333	0.0197624	LIHC
cg06936709	-0.260127	-10.0659	6.95022e-13	2.52909e-07	0.325843	0.0677737	LIHC
cg06944050	-0.348942	-13.8197	1.96775e-17	7.16038e-12	0.376973	0.0324556	LIHC
cg06980881	-0.111136	-11.7664	4.84122e-15	1.76165e-09	0.132632	0.0201006	LIHC
cg06981242	-0.26016	-7.99827	4.71673e-10	0.000171635	0.300968	0.0440687	LIHC
cg07011790	-0.314675	-10.3125	3.30441e-13	1.20243e-07	0.326413	0.0317047	LIHC
cg07042747	-0.190079	-9.02734	1.72859e-11	6.29009e-06	0.217056	0.0340092	LIHC
cg07056550	-0.343927	-14.2992	5.85755e-18	2.13148e-12	0.345114	0.0199275	LIHC
cg07136610	-0.22274	-7.86791	7.22459e-10	0.000262893	0.248666	0.0251305	LIHC
cg07137581	-0.253951	-14.1131	9.34472e-18	3.40041e-12	0.27196	0.026963	LIHC
cg07147350	-0.279003	-11.0221	4.0652e-14	1.47927e-08	0.439153	0.126433	LIHC
cg07151929	-0.0762832	-7.24706	5.60831e-09	0.00204079	0.17622	0.0989959	LIHC
cg07180121	-0.273353	-9.79715	1.5761e-12	5.73522e-07	0.33856	0.0833386	LIHC
cg07195705	0.153377	6.36583	1.06652e-07	0.0388093	0.79111	0.931085	LIHC
cg07208231	-0.160647	-10.1418	5.52272e-13	2.00964e-07	0.183375	0.0216884	LIHC
cg07210774	-0.311969	-9.97455	9.17035e-13	3.33696e-07	0.341273	0.0354629	LIHC
cg07210835	-0.268741	-8.47025	1.0211e-10	3.71564e-05	0.316274	0.0432618	LIHC
cg07240096	-0.278321	-11.5119	9.94109e-15	3.61742e-09	0.304536	0.0358427	LIHC
cg07242375	-0.253793	-14.3668	4.94769e-18	1.8004e-12	0.280618	0.0415764	LIHC
cg07253552	-0.174214	-11.3148	1.74554e-14	6.35178e-09	0.213808	0.0421781	LIHC
cg07256221	-0.261365	-15.638	2.28223e-19	8.30471e-14	0.292818	0.0279742	LIHC
cg07256643	-0.243674	-6.83367	2.22507e-08	0.00809673	0.459313	0.197419	LIHC
cg07264097	-0.365993	-15.8791	1.29866e-19	4.72565e-14	0.415239	0.0498754	LIHC
cg07309821	-0.316147	-16.1029	7.73906e-20	2.81613e-14	0.392617	0.0800535	LIHC
cg07311845	-0.224003	-8.32503	1.63126e-10	5.93594e-05	0.245241	0.0207383	LIHC
cg07318999	0.219071	7.8083	8.78422e-10	0.000319646	0.727029	0.929523	LIHC
cg07354666	-0.12946	-7.16792	7.29651e-09	0.0026551	0.155553	0.0332545	LIHC
cg07368951	-0.246525	-9.63208	2.61805e-12	9.52673e-07	0.271404	0.0295129	LIHC
cg07382899	-0.2158	-12.0317	2.30767e-15	8.3973e-10	0.239971	0.02581	LIHC
cg07388258	-0.243157	-11.5584	8.71245e-15	3.17034e-09	0.310583	0.0860233	LIHC
cg07390373	-0.213968	-8.83202	3.20948e-11	1.16788e-05	0.39795	0.192424	LIHC
cg07428182	-0.316627	-9.7002	2.12246e-12	7.72335e-07	0.421491	0.081764	LIHC
cg07434817	-0.259235	-13.0838	1.33309e-16	4.85091e-11	0.29429	0.027421	LIHC
cg07457143	0.159449	7.39867	3.39142e-09	0.00123409	0.754194	0.902855	LIHC
cg07469691	0.245424	9.8154	1.4904e-12	5.42336e-07	0.672383	0.909944	LIHC
cg07470526	0.152993	6.38231	1.00917e-07	0.0367222	0.793117	0.943359	LIHC
cg07471703	0.120683	6.58919	5.04372e-08	0.0183534	0.842297	0.946003	LIHC
cg07473550	-0.314445	-13.1074	1.25234e-16	4.55709e-11	0.330246	0.0235704	LIHC
cg07507339	-0.391569	-20.0823	1.72012e-23	6.25929e-18	0.413953	0.0261416	LIHC
cg07508090	-0.213282	-10.7082	1.01889e-13	3.70758e-08	0.239523	0.0302319	LIHC
cg07573912	-0.171474	-7.5949	1.77271e-09	0.000645064	0.201632	0.0209526	LIHC
cg07581973	-0.463013	-29.2981	4.48649e-30	1.63257e-24	0.496163	0.0305918	LIHC
cg07590102	0.209066	6.58421	5.12865e-08	0.0186624	0.74109	0.937155	LIHC
cg07605754	-0.297153	-13.7831	2.16095e-17	7.8634e-12	0.335608	0.0444286	LIHC
cg07635888	-0.186255	-7.27088	5.18174e-09	0.00188556	0.226415	0.0349475	LIHC
cg07649160	-0.293265	-15.8029	1.55085e-19	5.64331e-14	0.311878	0.0265568	LIHC
cg07650640	0.110431	8.40338	1.2666e-10	4.60897e-05	0.833222	0.92665	LIHC
cg07681139	-0.0849519	-7.73791	1.10689e-09	0.00040278	0.105579	0.0198375	LIHC
cg07681653	-0.273325	-6.61786	4.58181e-08	0.0166726	0.55845	0.280283	LIHC
cg07748875	-0.179663	-7.08466	9.62738e-09	0.00350327	0.253956	0.0820721	LIHC
cg07768177	-0.398956	-7.61835	1.64079e-09	0.000597059	0.548865	0.189199	LIHC
cg07780887	0.0780729	6.80137	2.4789e-08	0.00902038	0.9072	0.975619	LIHC
cg07792041	-0.285914	-13.5063	4.40937e-17	1.60451e-11	0.32061	0.0367493	LIHC
cg07796014	-0.220773	-10.7894	8.02412e-14	2.91986e-08	0.291596	0.0711618	LIHC
cg07799491	-0.214998	-12.9649	1.82713e-16	6.64867e-11	0.236114	0.0190107	LIHC
cg07861014	0.203064	8.36748	1.42217e-10	5.17509e-05	0.769396	0.960499	LIHC
cg07863318	-0.254878	-12.1446	1.6879e-15	6.14202e-10	0.269449	0.0199303	LIHC
cg07869461	-0.135163	-6.97936	1.36773e-08	0.00497697	0.164075	0.0301598	LIHC
cg07874284	-0.18688	-7.77903	9.66992e-10	0.000351875	0.240316	0.0446069	LIHC
cg07876586	-0.30553	-10.7167	9.93872e-14	3.61656e-08	0.361885	0.0510064	LIHC
cg07933757	-0.227013	-11.6761	6.24396e-15	2.27209e-09	0.252109	0.022728	LIHC
cg07940380	-0.259291	-9.4368	4.79269e-12	1.74399e-06	0.302475	0.0565966	LIHC
cg07946630	-0.53177	-22.7684	1.21823e-25	4.43298e-20	0.566456	0.04283	LIHC
cg07981033	0.230564	6.54369	5.8746e-08	0.0213768	0.614194	0.814659	LIHC
cg08065501	-0.359642	-26.3251	3.54349e-28	1.28943e-22	0.367527	0.0193497	LIHC
cg08076508	-0.295423	-15.1088	8.03681e-19	2.92448e-13	0.3398	0.0508932	LIHC
cg08081144	-0.446138	-8.68821	5.07575e-11	1.84699e-05	0.520281	0.101005	LIHC
cg08087512	-0.280101	-12.7245	3.4743e-16	1.26425e-10	0.361498	0.0855478	LIHC
cg08087911	-0.342218	-18.6519	3.00717e-22	1.09427e-16	0.378421	0.0381014	LIHC
cg08093211	-0.147502	-6.6724	3.81681e-08	0.0138888	0.157657	0.0167645	LIHC
cg08099387	-0.13202	-7.46032	2.7652e-09	0.00100622	0.166668	0.0343332	LIHC
cg08104711	-0.287812	-8.55573	7.75814e-11	2.82308e-05	0.365762	0.0662561	LIHC
cg08113756	-0.148461	-8.33624	1.57321e-10	5.72469e-05	0.206502	0.0467269	LIHC
cg08115220	-0.17424	-8.64122	5.89882e-11	2.1465e-05	0.223944	0.0519722	LIHC
cg08117103	0.150459	6.43747	8.38751e-08	0.030521	0.786906	0.927909	LIHC
cg08118032	-0.41011	-22.8562	1.04495e-25	3.80242e-20	0.417166	0.0185111	LIHC
cg08118341	-0.22596	-11.8317	4.03072e-15	1.46672e-09	0.249135	0.0225306	LIHC
cg08130682	-0.207821	-12.4156	8.02122e-16	2.91881e-10	0.22127	0.014154	LIHC
cg08156775	0.1997	8.18348	2.58067e-10	9.39068e-05	0.748349	0.901227	LIHC
cg08195522	-0.260085	-9.74977	1.82262e-12	6.63225e-07	0.30642	0.0452404	LIHC
cg08195538	-0.177993	-6.75122	2.93167e-08	0.0106679	0.242442	0.0511874	LIHC
cg08209935	0.20225	8.28848	1.83603e-10	6.68107e-05	0.756915	0.945963	LIHC
cg08214610	-0.286491	-17.762	1.94782e-21	7.08786e-16	0.315562	0.019663	LIHC
cg08221357	-0.361562	-18.1697	8.20278e-22	2.98488e-16	0.384885	0.0350607	LIHC
cg08222221	-0.139206	-7.13989	8.00985e-09	0.00291467	0.207263	0.0710923	LIHC
cg08236172	0.264109	10.2382	4.13112e-13	1.50326e-07	0.683687	0.927414	LIHC
cg08239458	-0.359049	-23.5592	3.11581e-26	1.1338e-20	0.398546	0.0473261	LIHC
cg08248532	-0.274347	-10.7994	7.79163e-14	2.83527e-08	0.323811	0.0431762	LIHC
cg08262933	-0.103013	-7.47027	2.67568e-09	0.000973644	0.123697	0.0162345	LIHC
cg08266027	0.197209	6.4931	6.96024e-08	0.0253273	0.638545	0.798314	LIHC
cg08275242	-0.396686	-17.4376	3.91891e-21	1.42604e-15	0.432875	0.0542877	LIHC
cg08280623	-0.192619	-7.2929	4.81627e-09	0.00175257	0.285333	0.0990709	LIHC
cg08300622	-0.35579	-12.4704	6.90943e-16	2.51424e-10	0.382096	0.0312077	LIHC
cg08327960	-0.418688	-17.7048	2.20195e-21	8.0126e-16	0.44813	0.0535047	LIHC
cg08333400	0.13687	6.8381	2.19237e-08	0.00797771	0.767826	0.891671	LIHC
cg08338641	-0.430976	-20.5865	6.52563e-24	2.37459e-18	0.435817	0.0215807	LIHC
cg08342708	0.178074	7.2393	5.75476e-09	0.00209408	0.796194	0.962826	LIHC
cg08348649	-0.356454	-6.37407	1.03746e-07	0.0377517	0.54365	0.183253	LIHC
cg08349204	-0.212081	-11.2292	2.23275e-14	8.12468e-09	0.273792	0.0538059	LIHC
cg08401365	0.22997	10.9857	4.51935e-14	1.64453e-08	0.658844	0.862428	LIHC
cg08434396	-0.266142	-12.8459	2.50938e-16	9.13128e-11	0.296684	0.0356294	LIHC
cg08435532	-0.237983	-13.0546	1.44005e-16	5.24013e-11	0.270482	0.0330697	LIHC
cg08457610	0.196999	6.76644	2.78616e-08	0.0101385	0.752721	0.933744	LIHC
cg08461617	-0.347574	-7.28542	4.93737e-09	0.00179664	0.43945	0.0941016	LIHC
cg08491357	-0.198389	-11.6932	5.94904e-15	2.16477e-09	0.240339	0.0472963	LIHC
cg08539065	-0.20756	-11.3538	1.561e-14	5.68026e-09	0.236938	0.0312856	LIHC
cg08560117	-0.346367	-24.4114	7.4865e-27	2.72423e-21	0.365029	0.0178776	LIHC
cg08614574	0.286571	12.2628	1.21866e-15	4.43454e-10	0.592374	0.843583	LIHC
cg08656747	-0.225537	-11.1588	2.73531e-14	9.95342e-09	0.23667	0.00805714	LIHC
cg08663085	-0.262174	-12.047	2.21135e-15	8.04678e-10	0.28418	0.0230101	LIHC
cg08680085	-0.369947	-19.678	3.79707e-23	1.3817e-17	0.400724	0.041149	LIHC
cg08695223	-0.387857	-22.5326	1.84361e-25	6.70865e-20	0.440786	0.0422412	LIHC
cg08698436	0.274129	7.62094	1.62681e-09	0.000591973	0.546384	0.818155	LIHC
cg08707617	0.290302	14.5688	2.99805e-18	1.09095e-12	0.671078	0.941191	LIHC
cg08728127	-0.297656	-11.9439	2.94608e-15	1.07204e-09	0.354924	0.0603224	LIHC
cg08783735	0.191475	7.08659	9.56571e-09	0.00348083	0.774451	0.937038	LIHC
cg08785133	-0.438746	-19.792	3.03326e-23	1.10376e-17	0.448245	0.0175791	LIHC
cg08786860	-0.220944	-8.32094	1.65301e-10	6.01507e-05	0.312122	0.0656535	LIHC
cg08791697	-0.219911	-7.51799	2.28516e-09	0.000831538	0.321386	0.111109	LIHC
cg08841290	-0.334158	-17.0468	9.21779e-21	3.35422e-15	0.343889	0.0233816	LIHC
cg08843314	0.200548	7.09518	9.29589e-09	0.00338264	0.768073	0.941731	LIHC
cg08846002	-0.222119	-7.53079	2.19055e-09	0.000797111	0.25898	0.0556922	LIHC
cg08855111	-0.398512	-6.87828	1.91686e-08	0.00697517	0.480266	0.130812	LIHC
cg08860608	-0.415774	-9.96274	9.50581e-13	3.45903e-07	0.493342	0.0674475	LIHC
cg08862109	0.198641	6.92791	1.62403e-08	0.00590962	0.693904	0.866173	LIHC
cg08867430	0.185643	6.33592	1.17905e-07	0.042904	0.782919	0.952663	LIHC
cg08871010	0.303948	8.05338	3.9406e-10	0.000143393	0.646601	0.924021	LIHC
cg08873063	-0.355954	-15.6615	2.15968e-19	7.85878e-14	0.386394	0.0353471	LIHC
cg08874821	-0.344612	-19.7753	3.13406e-23	1.14044e-17	0.371073	0.02922	LIHC
cg08955859	-0.289117	-15.0509	9.24126e-19	3.36276e-13	0.310874	0.0329571	LIHC
cg08965337	-0.224991	-9.80282	1.54896e-12	5.63643e-07	0.245063	0.010447	LIHC
cg08973646	-0.369495	-14.0845	1.00434e-17	3.65464e-12	0.4209	0.0494775	LIHC
cg08983668	-0.336808	-11.3086	1.777e-14	6.46626e-09	0.411737	0.0589436	LIHC
cg08991015	-0.183859	-12.3464	9.6909e-16	3.52638e-10	0.226139	0.0370156	LIHC
cg09005457	0.175569	7.01432	1.21717e-08	0.0044291	0.79637	0.945738	LIHC
cg09006810	-0.2654	-10.0487	7.32105e-13	2.66403e-07	0.346752	0.0878131	LIHC
cg09039264	0.199284	6.5731	5.32306e-08	0.0193699	0.666891	0.857831	LIHC
cg09049751	0.177324	9.81074	1.51183e-12	5.50132e-07	0.691215	0.859385	LIHC
cg09055253	-0.239722	-14.3185	5.58084e-18	2.03079e-12	0.286442	0.0435683	LIHC
cg09058241	-0.094708	-7.22962	5.9429e-09	0.00216254	0.118405	0.0252751	LIHC
cg09144786	-0.193952	-13.0913	1.30687e-16	4.75553e-11	0.226727	0.0318807	LIHC
cg09163457	-0.296445	-7.28494	4.94527e-09	0.00179951	0.364161	0.0675422	LIHC
cg09176853	-0.272717	-9.97075	9.27688e-13	3.37573e-07	0.30983	0.047106	LIHC
cg09182733	0.280232	7.21224	6.29647e-09	0.0022912	0.602507	0.87663	LIHC
cg09186478	-0.347548	-13.8852	1.66497e-17	6.05858e-12	0.344946	0.0207386	LIHC
cg09192294	0.314581	13.8988	1.60814e-17	5.85178e-12	0.606944	0.914728	LIHC
cg09227616	-0.250109	-9.48992	4.06394e-12	1.47881e-06	0.334771	0.0774114	LIHC
cg09238868	0.166104	8.97371	2.04783e-11	7.45177e-06	0.77874	0.922883	LIHC
cg09252204	-0.232127	-11.6504	6.7137e-15	2.44302e-09	0.245836	0.0171226	LIHC
cg09253663	-0.405193	-21.6046	9.76738e-25	3.55421e-19	0.432244	0.0326289	LIHC
cg09277772	-0.172778	-8.19875	2.45581e-10	8.93635e-05	0.220691	0.0303398	LIHC
cg09284266	-0.169965	-8.0643	3.8029e-10	0.000138382	0.21793	0.0603612	LIHC
cg09286880	0.221062	7.22945	5.94642e-09	0.00216382	0.674726	0.870664	LIHC
cg09302010	-0.180498	-9.34226	6.43338e-12	2.34102e-06	0.277316	0.082065	LIHC
cg09319393	-0.286554	-15.4746	3.35576e-19	1.22111e-13	0.336434	0.04804	LIHC
cg09326448	-0.197052	-12.1013	1.90259e-15	6.92325e-10	0.22717	0.023875	LIHC
cg09354738	-0.321471	-10.5586	1.58597e-13	5.77111e-08	0.444561	0.113177	LIHC
cg09370051	-0.191758	-10.4114	2.45772e-13	8.94331e-08	0.220539	0.0312534	LIHC
cg09370183	0.232191	9.97368	9.19443e-13	3.34572e-07	0.651967	0.846538	LIHC
cg09385630	-0.116607	-9.24564	8.70152e-12	3.16636e-06	0.178758	0.0646297	LIHC
cg09407693	-0.152753	-6.69997	3.48028e-08	0.0126643	0.20386	0.0429801	LIHC
cg09418623	-0.206931	-6.70439	3.42915e-08	0.0124782	0.289673	0.0504618	LIHC
cg09445383	-0.199657	-6.7001	3.47878e-08	0.0126588	0.214893	0.0269922	LIHC
cg09483847	0.231639	8.63586	6.00083e-11	2.18362e-05	0.749474	0.965544	LIHC
cg09553014	-0.26395	-9.03306	1.69768e-11	6.17762e-06	0.303925	0.0438607	LIHC
cg09581098	-0.226473	-9.83363	1.40955e-12	5.12917e-07	0.239902	0.0240219	LIHC
cg09598844	-0.315882	-12.7961	2.86712e-16	1.0433e-10	0.350154	0.0480759	LIHC
cg09599027	0.153675	7.09383	9.3379e-09	0.00339793	0.789657	0.91687	LIHC
cg09625066	-0.205655	-6.87703	1.92488e-08	0.00700439	0.525799	0.306921	LIHC
cg09628099	-0.138073	-10.1004	6.25966e-13	2.2778e-07	0.19394	0.0564341	LIHC
cg09655938	0.242389	6.36427	1.07211e-07	0.0390127	0.51778	0.742864	LIHC
cg09662907	-0.211643	-10.135	5.63753e-13	2.05142e-07	0.247211	0.02929	LIHC
cg09673206	-0.121772	-7.10459	9.00895e-09	0.00327823	0.146687	0.0332659	LIHC
cg09720420	-0.249428	-8.17816	2.62566e-10	9.55441e-05	0.381498	0.148741	LIHC
cg09724624	-0.251196	-11.7522	5.03963e-15	1.83385e-09	0.269544	0.0284902	LIHC
cg09725439	-0.329936	-16.8806	1.33201e-20	4.84699e-15	0.352194	0.0362598	LIHC
cg09743261	-0.326664	-13.5693	3.74482e-17	1.36269e-11	0.391743	0.0808357	LIHC
cg09781635	-0.211019	-6.87698	1.92521e-08	0.00700558	0.301135	0.0662353	LIHC
cg09789474	0.244217	8.48262	9.81248e-11	3.57062e-05	0.594079	0.830843	LIHC
cg09810925	-0.156965	-7.87776	6.99524e-10	0.000254547	0.17466	0.0234705	LIHC
cg09815545	-0.19076	-7.27963	5.03332e-09	0.00183155	0.222086	0.0369371	LIHC
cg09824104	-0.258378	-9.25743	8.3862e-12	3.05162e-06	0.273314	0.0185385	LIHC
cg09867302	-0.261609	-11.2477	2.11685e-14	7.70292e-09	0.296396	0.0450937	LIHC
cg09909750	-0.325252	-14.2553	6.53635e-18	2.37848e-12	0.340526	0.022116	LIHC
cg09912841	-0.139614	-10.4312	2.31695e-13	8.43106e-08	0.171845	0.0289562	LIHC
cg09920632	-0.326998	-17.9264	1.37195e-21	4.99233e-16	0.3674	0.0433425	LIHC
cg09923855	-0.32064	-20.5238	7.35418e-24	2.67608e-18	0.331022	0.0195207	LIHC
cg09946139	-0.10829	-7.21854	6.16585e-09	0.00224367	0.13579	0.037938	LIHC
cg09950034	-0.350137	-15.6264	2.34523e-19	8.53395e-14	0.377384	0.0396582	LIHC
cg09966745	-0.284977	-20.8992	3.61176e-24	1.31427e-18	0.330897	0.0494401	LIHC
cg10001778	-0.296415	-6.65627	4.02867e-08	0.0146598	0.383724	0.0702278	LIHC
cg10008347	-0.329554	-9.48018	4.18859e-12	1.52417e-06	0.372968	0.048869	LIHC
cg10018458	-0.30046	-9.66946	2.3331e-12	8.48982e-07	0.382633	0.0752882	LIHC
cg10030436	-0.319193	-19.5171	5.2216e-23	1.90007e-17	0.343653	0.0284345	LIHC
cg10055173	-0.366641	-14.8079	1.66699e-18	6.06593e-13	0.396728	0.0412971	LIHC
cg10055320	0.188405	7.19047	6.76927e-09	0.00246324	0.692349	0.834157	LIHC
cg10062550	0.183839	6.49311	6.95998e-08	0.0253264	0.716713	0.881812	LIHC
cg10070741	0.187256	6.67001	3.84745e-08	0.0140003	0.780608	0.957133	LIHC
cg10072574	-0.246425	-8.81607	3.37649e-11	1.22866e-05	0.283988	0.0218052	LIHC
cg10090585	-0.120379	-6.5566	5.62568e-08	0.0204711	0.140156	0.0133856	LIHC
cg10098570	0.260746	10.1883	4.80023e-13	1.74673e-07	0.57821	0.820448	LIHC
cg10101479	-0.353343	-18.2325	7.1906e-22	2.61656e-16	0.367133	0.0253787	LIHC
cg10102167	-0.377081	-16.5009	3.12141e-20	1.13584e-14	0.398923	0.0311959	LIHC
cg10105844	-0.297192	-11.3807	1.44544e-14	5.25976e-09	0.305102	0.035191	LIHC
cg10127939	-0.244922	-9.20513	9.87948e-12	3.59501e-06	0.300617	0.0514002	LIHC
cg10143752	0.240264	8.52732	8.49911e-11	3.09271e-05	0.753644	0.969997	LIHC
cg10174816	-0.304427	-13.6931	2.72182e-17	9.90434e-12	0.359886	0.0608379	LIHC
cg10196665	-0.0895315	-6.92152	1.65903e-08	0.00603699	0.11003	0.0259205	LIHC
cg10208578	0.243574	8.74477	4.2373e-11	1.5419e-05	0.704723	0.923448	LIHC
cg10237576	-0.162248	-7.86164	7.37459e-10	0.000268351	0.199911	0.0351768	LIHC
cg10273882	-0.210229	-11.0102	4.20876e-14	1.53151e-08	0.231656	0.0332087	LIHC
cg10293967	-0.373136	-7.28077	5.01417e-09	0.00182459	0.587504	0.238833	LIHC
cg10310824	-0.30582	-14.803	1.68696e-18	6.1386e-13	0.330348	0.0453204	LIHC
cg10318351	-0.289081	-13.5693	3.7454e-17	1.3629e-11	0.324349	0.0368212	LIHC
cg10401803	-0.290021	-15.3862	4.13841e-19	1.50591e-13	0.315446	0.0209894	LIHC
cg10403109	-0.321395	-13.3557	6.52363e-17	2.37386e-11	0.358917	0.0499487	LIHC
cg10407245	-0.285992	-15.1466	7.33791e-19	2.67016e-13	0.32602	0.049165	LIHC
cg10425032	-0.178051	-6.40381	9.38964e-08	0.0341676	0.21634	0.0396832	LIHC
cg10426500	-0.288132	-16.3773	4.13099e-20	1.50321e-14	0.313698	0.0316195	LIHC
cg10455133	-0.148891	-8.96818	2.08397e-11	7.58327e-06	0.162389	0.013496	LIHC
cg10509982	0.173701	6.34003	1.16291e-07	0.0423166	0.763972	0.941076	LIHC
cg10519228	-0.235604	-15.2771	5.36789e-19	1.9533e-13	0.27108	0.0426919	LIHC
cg10526888	-0.233492	-8.46064	1.05317e-10	3.83234e-05	0.272401	0.0334402	LIHC
cg10530128	-0.229317	-12.83	2.61855e-16	9.52853e-11	0.289466	0.0585227	LIHC
cg10530733	-0.14606	-7.78588	9.45506e-10	0.000344056	0.234584	0.0865046	LIHC
cg10536534	-0.289514	-14.5731	2.96654e-18	1.07948e-12	0.339633	0.0544778	LIHC
cg10543257	-0.321247	-8.09619	3.42762e-10	0.000124726	0.362432	0.0630244	LIHC
cg10560144	-0.310689	-13.8431	1.85348e-17	6.74455e-12	0.329935	0.0129813	LIHC
cg10575170	-0.298397	-16.0422	8.90151e-20	3.23913e-14	0.325134	0.0306365	LIHC
cg10591659	0.233811	8.07056	3.726e-10	0.000135584	0.64724	0.856688	LIHC
cg10709704	-0.305154	-14.2323	6.92412e-18	2.51959e-12	0.368715	0.0796448	LIHC
cg10710494	0.242529	6.47191	7.47263e-08	0.0271919	0.628469	0.821605	LIHC
cg10723245	-0.104105	-10.2497	3.99005e-13	1.45192e-07	0.131815	0.0281975	LIHC
cg10723556	-0.301789	-13.7501	2.35148e-17	8.55672e-12	0.391701	0.0918541	LIHC
cg10783042	-0.273656	-8.20876	2.37737e-10	8.65091e-05	0.349917	0.0777992	LIHC
cg10857887	-0.186433	-10.3266	3.16767e-13	1.15267e-07	0.212425	0.0310584	LIHC
cg10864286	-0.0718798	-6.50995	6.57797e-08	0.0239363	0.0952719	0.0216726	LIHC
cg10902968	-0.149497	-6.58171	5.17169e-08	0.018819	0.163444	0.0198797	LIHC
cg10906138	-0.274091	-6.40027	9.50165e-08	0.0345752	0.336987	0.0396599	LIHC
cg10950297	-0.446396	-17.0987	8.22153e-21	2.9917e-15	0.47736	0.0286243	LIHC
cg10981178	-0.352896	-22.0093	4.6868e-25	1.70546e-19	0.362586	0.0191156	LIHC
cg10999701	-0.193749	-6.96664	1.42706e-08	0.00519287	0.203229	0.00779385	LIHC
cg11014998	-0.219132	-8.23608	2.17571e-10	7.9171e-05	0.328169	0.128518	LIHC
cg11016745	-0.383903	-17.1409	7.4923e-21	2.72634e-15	0.402498	0.0233273	LIHC
cg11019890	0.174363	6.82052	2.32512e-08	0.00846077	0.777431	0.925626	LIHC
cg11036643	-0.189383	-9.24685	8.66865e-12	3.1544e-06	0.232686	0.049844	LIHC
cg11038686	-0.205316	-11.5593	8.68891e-15	3.16177e-09	0.223459	0.0183589	LIHC
cg11072201	-0.247366	-6.79591	2.52454e-08	0.00918645	0.306212	0.0680406	LIHC
cg11080085	-0.360531	-20.0936	1.68277e-23	6.12336e-18	0.403641	0.0466918	LIHC
cg11085564	0.218711	7.95889	5.36425e-10	0.000195197	0.700735	0.884736	LIHC
cg11111083	-0.257901	-13.5325	4.11939e-17	1.49899e-11	0.293055	0.0235615	LIHC
cg11117255	0.242802	9.95235	9.81124e-13	3.57017e-07	0.579798	0.801194	LIHC
cg11152528	-0.30591	-8.8228	3.30496e-11	1.20263e-05	0.369996	0.0672719	LIHC
cg11165479	-0.370489	-14.4116	4.42582e-18	1.6105e-12	0.402908	0.0437318	LIHC
cg11253356	-0.28776	-11.7914	4.51293e-15	1.64219e-09	0.341095	0.0605005	LIHC
cg11264711	-0.294732	-7.77461	9.81135e-10	0.000357021	0.361572	0.102537	LIHC
cg11291009	-0.339977	-14.5194	3.38782e-18	1.23278e-12	0.381294	0.0427748	LIHC
cg11304846	0.147669	6.95196	1.49873e-08	0.00545366	0.76729	0.90311	LIHC
cg11320810	-0.324191	-16.7869	1.64151e-20	5.97321e-15	0.413799	0.0900197	LIHC
cg11321432	0.192632	7.60546	1.71202e-09	0.000622982	0.58975	0.77534	LIHC
cg11321526	0.234025	7.04039	1.11583e-08	0.00406036	0.66666	0.857564	LIHC
cg11332786	-0.16962	-7.74764	1.07205e-09	0.000390103	0.217166	0.0557602	LIHC
cg11337462	0.287942	10.567	1.5469e-13	5.62895e-08	0.687893	0.948832	LIHC
cg11340371	-0.110593	-8.62824	6.14892e-11	2.23751e-05	0.162581	0.0524413	LIHC
cg11369993	-0.382863	-11.6078	7.57302e-15	2.75571e-09	0.46513	0.063483	LIHC
cg11371160	-0.285457	-15.6101	2.43694e-19	8.86767e-14	0.315098	0.0251285	LIHC
cg11441847	-0.147373	-13.0674	1.39206e-16	5.06552e-11	0.195187	0.0514896	LIHC
cg11454836	0.168236	7.77969	9.64912e-10	0.000351118	0.692772	0.837015	LIHC
cg11468748	-0.217301	-9.01141	1.81778e-11	6.61466e-06	0.278563	0.0494008	LIHC
cg11475300	0.235735	8.7813	3.77159e-11	1.37243e-05	0.716432	0.932758	LIHC
cg11479591	-0.256351	-9.96837	9.34433e-13	3.40027e-07	0.260063	0.0151696	LIHC
cg11498602	-0.292326	-16.0977	7.83153e-20	2.84978e-14	0.330703	0.0374874	LIHC
cg11516614	0.286797	11.9371	3.00233e-15	1.0925e-09	0.649093	0.922782	LIHC
cg11534974	0.18811	9.36853	5.9275e-12	2.15693e-06	0.789795	0.95783	LIHC
cg11538407	0.145692	6.75673	2.87817e-08	0.0104733	0.782243	0.920423	LIHC
cg11565248	-0.240157	-12.4301	7.71054e-16	2.80576e-10	0.262172	0.0143555	LIHC
cg11631710	-0.184243	-7.32522	4.32644e-09	0.00157433	0.224711	0.0372808	LIHC
cg11633086	-0.198399	-7.20539	6.44145e-09	0.00234395	0.21382	0.0312227	LIHC
cg11640914	0.212845	7.82189	8.40103e-10	0.000305702	0.724886	0.936391	LIHC
cg11641061	-0.250373	-10.1391	5.56914e-13	2.02653e-07	0.279081	0.035836	LIHC
cg11648471	-0.262773	-12.9036	2.15087e-16	7.82673e-11	0.323227	0.0515368	LIHC
cg11657258	0.20161	7.36175	3.83285e-09	0.00139472	0.635252	0.797722	LIHC
cg11661234	-0.308976	-14.0506	1.09416e-17	3.98149e-12	0.356605	0.0598831	LIHC
cg11663421	-0.198155	-9.4372	4.78673e-12	1.74182e-06	0.254986	0.0516531	LIHC
cg11664825	-0.233418	-10.7926	7.94887e-14	2.89248e-08	0.355127	0.117992	LIHC
cg11667509	-0.172781	-8.038	4.14329e-10	0.000150768	0.244097	0.0807926	LIHC
cg11673013	-0.401129	-8.97046	2.06902e-11	7.52886e-06	0.463797	0.0624146	LIHC
cg11675904	-0.289243	-16.4557	3.4572e-20	1.25803e-14	0.313881	0.0347018	LIHC
cg11708870	-0.28558	-13.5677	3.76092e-17	1.36855e-11	0.309391	0.0337448	LIHC
cg11717930	-0.207756	-8.59184	6.90964e-11	2.51432e-05	0.343418	0.15232	LIHC
cg11720010	0.253113	9.98212	8.96163e-13	3.26101e-07	0.664586	0.89644	LIHC
cg11727174	-0.393818	-16.7955	1.61002e-20	5.85865e-15	0.452003	0.0565375	LIHC
cg11806565	-0.382404	-12.6469	4.28253e-16	1.55835e-10	0.445983	0.056053	LIHC
cg11810837	-0.177488	-7.96699	5.22418e-10	0.000190101	0.190008	0.0247051	LIHC
cg11857742	-0.274558	-9.99079	8.72851e-13	3.17618e-07	0.333446	0.0554719	LIHC
cg11859478	-0.228224	-10.0794	6.67163e-13	2.42771e-07	0.249274	0.0265542	LIHC
cg11864871	0.181575	8.72123	4.56773e-11	1.66213e-05	0.802954	0.967186	LIHC
cg11870452	-0.210739	-16.0382	8.98305e-20	3.2688e-14	0.242662	0.027737	LIHC
cg11871549	-0.248784	-8.81852	3.35028e-11	1.21912e-05	0.299626	0.0486505	LIHC
cg11901680	-0.355151	-19.9422	2.25979e-23	8.22305e-18	0.38659	0.031379	LIHC
cg11906997	-0.416973	-22.3023	2.77348e-25	1.00923e-19	0.467094	0.0458867	LIHC
cg11924796	0.186322	7.98003	5.00631e-10	0.000182173	0.761795	0.922829	LIHC
cg11941773	0.244797	9.2067	9.8309e-12	3.57733e-06	0.733889	0.954399	LIHC
cg12030973	-0.242769	-7.11308	8.75793e-09	0.00318689	0.322566	0.073998	LIHC
cg12038981	-0.204062	-11.5616	8.63353e-15	3.14162e-09	0.236779	0.0300359	LIHC
cg12045126	0.205497	6.49214	6.98266e-08	0.0254089	0.756191	0.903569	LIHC
cg12047536	-0.198757	-7.65446	1.45668e-09	0.000530064	0.262356	0.0551191	LIHC
cg12054566	-0.313151	-15.6788	2.07337e-19	7.54471e-14	0.368442	0.0606636	LIHC
cg12058508	-0.301391	-12.2483	1.26814e-15	4.6146e-10	0.358886	0.0457273	LIHC
cg12064213	-0.391158	-11.6207	7.30205e-15	2.65711e-09	0.425192	0.0460832	LIHC
cg12074916	-0.335946	-17.2264	6.20984e-21	2.25968e-15	0.373058	0.0408276	LIHC
cg12125741	-0.207096	-13.6788	2.82374e-17	1.02752e-11	0.261245	0.0557176	LIHC
cg12130976	0.202091	7.95412	5.44851e-10	0.000198264	0.768709	0.952832	LIHC
cg12171481	-0.380796	-17.2566	5.81342e-21	2.11542e-15	0.390711	0.0228724	LIHC
cg12176933	-0.192379	-10.0973	6.3193e-13	2.2995e-07	0.202153	0.0249072	LIHC
cg12194828	-0.253133	-9.88971	1.18755e-12	4.32131e-07	0.284876	0.0238634	LIHC
cg12204574	-0.339642	-7.21177	6.30625e-09	0.00229476	0.476275	0.156261	LIHC
cg12217778	-0.388834	-16.4837	3.24513e-20	1.18086e-14	0.411092	0.034294	LIHC
cg12226826	0.15515	6.53887	5.97024e-08	0.0217249	0.794069	0.938656	LIHC
cg12251508	-0.19603	-11.1165	3.09183e-14	1.12507e-08	0.249032	0.058448	LIHC
cg12291192	-0.267516	-14.0546	1.08326e-17	3.94184e-12	0.304748	0.0320753	LIHC
cg12308243	-0.365381	-16.9585	1.12066e-20	4.07793e-15	0.378944	0.0254252	LIHC
cg12324831	-0.217163	-9.89219	1.17858e-12	4.28869e-07	0.283071	0.0821951	LIHC
cg12360110	-0.221666	-6.78527	2.616e-08	0.00951927	0.2842	0.0512152	LIHC
cg12373280	-0.32832	-10.8271	7.18265e-14	2.61366e-08	0.388993	0.0565581	LIHC
cg12382941	-0.222063	-10.8048	7.66902e-14	2.79065e-08	0.259617	0.035217	LIHC
cg12384989	-0.309824	-8.24293	2.12797e-10	7.74339e-05	0.424705	0.103589	LIHC
cg12417438	-0.331573	-18.6201	3.21069e-22	1.16833e-16	0.369396	0.0460815	LIHC
cg12431196	-0.220922	-7.8526	7.59619e-10	0.000276415	0.278602	0.0530237	LIHC
cg12440269	-0.290168	-12.9335	1.98635e-16	7.22806e-11	0.311516	0.0282848	LIHC
cg12443477	-0.286902	-6.34152	1.15714e-07	0.0421066	0.375367	0.108369	LIHC
cg12467288	-0.326236	-16.085	8.06399e-20	2.93437e-14	0.41491	0.0877986	LIHC
cg12472203	-0.226167	-12.2019	1.44116e-15	5.24417e-10	0.259098	0.0288058	LIHC
cg12513189	-0.170124	-9.09506	1.39624e-11	5.08072e-06	0.193901	0.0295479	LIHC
cg12517167	-0.271379	-17.154	7.27874e-21	2.64863e-15	0.297996	0.029395	LIHC
cg12517811	-0.340221	-13.3938	5.90624e-17	2.1492e-11	0.40551	0.048114	LIHC
cg12527112	-0.230296	-11.8506	3.823e-15	1.39113e-09	0.26315	0.0262647	LIHC
cg12530936	-0.240924	-14.0232	1.17256e-17	4.26677e-12	0.279686	0.0403686	LIHC
cg12536534	-0.255138	-11.6219	7.27774e-15	2.64827e-09	0.34212	0.0940505	LIHC
cg12543132	-0.228498	-10.9946	4.40323e-14	1.60227e-08	0.277752	0.0552718	LIHC
cg12543929	0.217042	10.3209	3.22245e-13	1.17261e-07	0.753979	0.957499	LIHC
cg12550885	-0.164769	-7.70441	1.23581e-09	0.000449693	0.188415	0.0200328	LIHC
cg12589433	-0.136021	-7.58775	1.81504e-09	0.000660467	0.180476	0.0425355	LIHC
cg12591117	-0.154078	-10.4743	2.03768e-13	7.41482e-08	0.195853	0.0388524	LIHC
cg12622895	0.218527	10.6108	1.35867e-13	4.94399e-08	0.733576	0.943091	LIHC
cg12653105	-0.349985	-22.207	3.28718e-25	1.19616e-19	0.378438	0.0351533	LIHC
cg12687215	-0.409199	-21.3612	1.5276e-24	5.55872e-19	0.438085	0.0361247	LIHC
cg12689022	-0.305194	-9.03473	1.68874e-11	6.1451e-06	0.363931	0.0736744	LIHC
cg12713960	-0.20551	-12.6205	4.5994e-16	1.67366e-10	0.23452	0.0304965	LIHC
cg12728820	-0.136645	-7.78846	9.37515e-10	0.000341149	0.168291	0.032354	LIHC
cg12753358	-0.0828805	-7.94335	5.64379e-10	0.00020537	0.128013	0.0331603	LIHC
cg12755246	-0.317326	-14.499	3.56277e-18	1.29644e-12	0.344569	0.0402408	LIHC
cg12763824	-0.2964	-9.2212	9.39386e-12	3.41829e-06	0.384785	0.0981139	LIHC
cg12799835	-0.118392	-8.07989	3.61454e-10	0.000131528	0.188171	0.0641927	LIHC
cg12813325	-0.22671	-11.6236	7.24197e-15	2.63525e-09	0.259308	0.0247914	LIHC
cg12861974	-0.369102	-16.6607	2.17714e-20	7.92229e-15	0.51855	0.154519	LIHC
cg12865398	-0.349312	-15.9266	1.16312e-19	4.23242e-14	0.370446	0.0215005	LIHC
cg12875534	0.1458	6.45145	8.00324e-08	0.0291227	0.767841	0.902304	LIHC
cg12888005	-0.283033	-6.41367	9.0844e-08	0.0330569	0.425071	0.112215	LIHC
cg12900739	-0.130227	-7.91465	6.19927e-10	0.000225583	0.160372	0.0331019	LIHC
cg12938998	-0.122331	-8.88396	2.72135e-11	9.90261e-06	0.15352	0.0302692	LIHC
cg12940781	0.148183	6.51832	6.39584e-08	0.0232736	0.738445	0.884322	LIHC
cg12942133	-0.383928	-16.8249	1.50812e-20	5.48782e-15	0.436613	0.0540974	LIHC
cg13009425	-0.394843	-16.7684	1.71068e-20	6.22492e-15	0.422445	0.0416856	LIHC
cg13016553	-0.371768	-15.607	2.45454e-19	8.93172e-14	0.391464	0.0204505	LIHC
cg13069450	-0.237689	-17.3574	4.66532e-21	1.69764e-15	0.289418	0.0511174	LIHC
cg13077484	-0.359313	-11.8947	3.37937e-15	1.2297e-09	0.454576	0.115968	LIHC
cg13118590	0.178259	6.46531	7.63978e-08	0.0278001	0.772293	0.931878	LIHC
cg13121076	-0.310393	-6.38224	1.00942e-07	0.0367315	0.415508	0.128268	LIHC
cg13156574	-0.259714	-14.4514	4.00929e-18	1.45892e-12	0.287933	0.0160633	LIHC
cg13172884	0.191538	8.29292	1.8098e-10	6.58562e-05	0.731833	0.900507	LIHC
cg13177658	-0.217506	-11.8776	3.54531e-15	1.29009e-09	0.231748	0.02244	LIHC
cg13183496	-0.299926	-14.857	1.479e-18	5.38187e-13	0.31464	0.0242952	LIHC
cg13195284	-0.215585	-8.622	6.27303e-11	2.28267e-05	0.28371	0.0576053	LIHC
cg13217333	-0.296704	-8.98813	1.95656e-11	7.11964e-06	0.397894	0.0947155	LIHC
cg13223227	-0.164298	-8.32272	1.64348e-10	5.9804e-05	0.350517	0.183276	LIHC
cg13243544	-0.392442	-9.00915	1.8308e-11	6.66201e-06	0.455879	0.0482499	LIHC
cg13270115	0.210229	6.59924	4.87672e-08	0.0177457	0.664954	0.852487	LIHC
cg13273653	-0.307885	-10.9119	5.60442e-14	2.03937e-08	0.369299	0.0674626	LIHC
cg13279286	0.208483	7.22651	6.00482e-09	0.00218507	0.726059	0.918038	LIHC
cg13281447	-0.257665	-11.3477	1.58864e-14	5.78085e-09	0.310766	0.0642839	LIHC
cg13282942	-0.344816	-14.0206	1.18055e-17	4.29587e-12	0.39426	0.0511106	LIHC
cg13286902	-0.250042	-14.5211	3.37343e-18	1.22755e-12	0.276565	0.027611	LIHC
cg13307200	0.164193	6.93952	1.5623e-08	0.00568499	0.802079	0.949952	LIHC
cg13338084	-0.259066	-12.0494	2.19661e-15	7.99314e-10	0.299563	0.0381684	LIHC
cg13368805	-0.269384	-6.91085	1.71925e-08	0.00625612	0.450948	0.143505	LIHC
cg13370412	-0.172734	-9.55554	3.31636e-12	1.20678e-06	0.225087	0.0558045	LIHC
cg13370439	-0.308208	-12.0876	1.97616e-15	7.19095e-10	0.334931	0.0276494	LIHC
cg13370916	-0.18995	-8.23186	2.20568e-10	8.02615e-05	0.320407	0.113092	LIHC
cg13372830	-0.145207	-9.2911	7.54783e-12	2.74655e-06	0.18265	0.0339385	LIHC
cg13431666	-0.340591	-16.6762	2.10283e-20	7.65191e-15	0.359473	0.0168276	LIHC
cg13441872	-0.329124	-13.0212	1.57335e-16	5.72519e-11	0.363113	0.0476978	LIHC
cg13442104	-0.244468	-10.4708	2.05897e-13	7.49231e-08	0.316372	0.0519258	LIHC
cg13443410	-0.173305	-8.29802	1.78023e-10	6.478e-05	0.20082	0.0247649	LIHC
cg13489005	-0.401413	-20.2507	1.24168e-23	4.51831e-18	0.428029	0.0298469	LIHC
cg13506244	0.241023	8.04582	4.03895e-10	0.000146972	0.692344	0.926073	LIHC
cg13510054	-0.236906	-6.73851	3.0591e-08	0.0111316	0.389436	0.17205	LIHC
cg13516940	-0.341204	-10.1326	5.67841e-13	2.06629e-07	0.362436	0.0457476	LIHC
cg13542480	0.219735	7.85559	7.52233e-10	0.000273727	0.757394	0.964965	LIHC
cg13550079	-0.250305	-14.5277	3.31888e-18	1.20769e-12	0.267629	0.0230848	LIHC
cg13566908	-0.253351	-13.2112	9.52675e-17	3.46665e-11	0.269271	0.0228491	LIHC
cg13571540	-0.303955	-17.8575	1.58848e-21	5.78026e-16	0.312203	0.0180777	LIHC
cg13606829	-0.16844	-8.93519	2.31338e-11	8.41808e-06	0.195472	0.026475	LIHC
cg13616144	-0.335277	-13.746	2.37639e-17	8.64734e-12	0.362225	0.0323336	LIHC
cg13616735	-0.246294	-6.7208	3.24582e-08	0.0118111	0.311529	0.0576939	LIHC
cg13622893	-0.282634	-11.8943	3.38356e-15	1.23123e-09	0.294389	0.0175502	LIHC
cg13645300	-0.240774	-8.58191	7.13295e-11	2.59558e-05	0.281684	0.037411	LIHC
cg13651586	-0.291258	-17.6785	2.32991e-21	8.47821e-16	0.313372	0.0295694	LIHC
cg13655660	-0.31894	-16.918	1.22598e-20	4.46117e-15	0.33644	0.0329886	LIHC
cg13658777	-0.278053	-9.48408	4.13818e-12	1.50582e-06	0.324882	0.0448198	LIHC
cg13663390	-0.264616	-10.4626	2.1101e-13	7.67837e-08	0.339909	0.0680627	LIHC
cg13674559	-0.286382	-12.984	1.7364e-16	6.31852e-11	0.317811	0.0474902	LIHC
cg13675517	-0.144864	-7.0341	1.13946e-08	0.00414635	0.21123	0.0445593	LIHC
cg13677598	-0.0863543	-7.09384	9.33747e-09	0.00339777	0.114465	0.0210831	LIHC
cg13751956	-0.237472	-11.2674	2.00051e-14	7.27959e-09	0.262724	0.0273502	LIHC
cg13766816	-0.422599	-17.8792	1.51682e-21	5.51951e-16	0.461629	0.0369916	LIHC
[truncated: 24,135 more rows]

## Sheet: sDMPs in NATs
sDMP	meanDiff	tstat	pval	bonf	meanFemale	meanMale	Cancer group
cg00008945	-0.303753	-27.0226	6.89667e-29	2.5096e-23	0.340054	0.0289638	LIHC
cg00011200	-0.362977	-32.345	3.88781e-32	1.41472e-26	0.388814	0.032533	LIHC
cg00011891	-0.418998	-57.2378	1.06167e-42	3.86326e-37	0.449338	0.0276726	LIHC
cg00016522	-0.324728	-22.061	2.66882e-25	9.71146e-20	0.37923	0.0521031	LIHC
cg00026186	-0.378146	-54.5814	8.21768e-42	2.9903e-36	0.400759	0.0150448	LIHC
cg00072288	-0.297499	-14.945	8.91686e-19	3.24472e-13	0.330612	0.0298582	LIHC
cg00112256	-0.44896	-32.5484	2.98894e-32	1.08763e-26	0.479448	0.0259087	LIHC
cg00114625	-0.44083	-49.6916	4.63884e-40	1.68801e-34	0.472839	0.0225428	LIHC
cg00114913	-0.328731	-20.2744	7.72589e-24	2.81134e-18	0.477501	0.138265	LIHC
cg00139317	-0.348835	-13.5396	3.14146e-17	1.14313e-11	0.466405	0.0928544	LIHC
cg00192980	-0.39402	-22.6384	9.4415e-26	3.43563e-20	0.450065	0.0520745	LIHC
cg00200463	-0.392738	-39.7223	6.6201e-36	2.40896e-30	0.448473	0.0533567	LIHC
cg00240113	-0.306924	-27.1214	5.93317e-29	2.159e-23	0.41792	0.117922	LIHC
cg00241296	-0.168496	-13.2786	6.24449e-17	2.27228e-11	0.210157	0.0327502	LIHC
cg00241907	-0.231225	-13.2802	6.21957e-17	2.26321e-11	0.27444	0.0426023	LIHC
cg00243584	-0.134315	-8.68303	4.60774e-11	1.67669e-05	0.441241	0.29767	LIHC
cg00264378	-0.325332	-24.2476	5.84925e-27	2.12846e-21	0.357456	0.0281004	LIHC
cg00360365	-0.130251	-10.9971	3.65456e-14	1.32984e-08	0.200093	0.0591044	LIHC
cg00373606	-0.333856	-40.8788	1.95315e-36	7.10725e-31	0.383929	0.0447591	LIHC
cg00374088	-0.292774	-21.0642	1.69495e-24	6.16768e-19	0.370564	0.0775731	LIHC
cg00391044	-0.300417	-17.4263	2.80605e-21	1.02108e-15	0.356912	0.0629923	LIHC
cg00399450	-0.413515	-26.914	8.14315e-29	2.96318e-23	0.449672	0.026744	LIHC
cg00408231	0.286959	20.3347	6.86946e-24	2.4997e-18	0.651476	0.934249	LIHC
cg00412010	-0.223998	-12.4732	5.49117e-16	1.99816e-10	0.458086	0.228261	LIHC
cg00412368	-0.283989	-11.3534	1.2928e-14	4.70432e-09	0.524131	0.247638	LIHC
cg00416689	-0.185033	-16.6774	1.49453e-20	5.4384e-15	0.229523	0.0372386	LIHC
cg00457389	-0.0618724	-7.64573	1.37618e-09	0.000500773	0.101875	0.0417975	LIHC
cg00458505	-0.411487	-36.372	2.77509e-34	1.00982e-28	0.468931	0.0484465	LIHC
cg00466309	-0.450927	-37.4232	8.30893e-35	3.0235e-29	0.482294	0.0267066	LIHC
cg00473354	-0.214285	-25.7964	4.65848e-28	1.69516e-22	0.247391	0.032808	LIHC
cg00478198	-0.400935	-33.8845	5.51131e-33	2.00549e-27	0.470295	0.0668887	LIHC
cg00529027	-0.330104	-25.9717	3.52789e-28	1.28375e-22	0.455919	0.127324	LIHC
cg00554969	-0.361282	-24.2721	5.61355e-27	2.04269e-21	0.437215	0.0729454	LIHC
cg00575851	-0.338133	-38.6628	2.08677e-35	7.59345e-30	0.400238	0.0611208	LIHC
cg00611101	-0.224611	-17.1758	4.8804e-21	1.77591e-15	0.250009	0.0218588	LIHC
cg00621925	-0.188194	-19.2174	6.35112e-23	2.31108e-17	0.227977	0.0458376	LIHC
cg00622384	-0.330713	-44.9932	3.26599e-38	1.18845e-32	0.356153	0.0249006	LIHC
cg00622389	-0.21343	-9.64072	2.21578e-12	8.06292e-07	0.384084	0.173261	LIHC
cg00645049	-0.445815	-39.7016	6.76816e-36	2.46284e-30	0.498277	0.0539255	LIHC
cg00661180	-0.23995	-15.7738	1.21167e-19	4.40908e-14	0.302417	0.0534494	LIHC
cg00666173	-0.441581	-43.4075	1.51227e-37	5.50295e-32	0.497954	0.0427355	LIHC
cg00680673	-0.395372	-40.5089	2.87549e-36	1.04635e-30	0.431952	0.0259856	LIHC
cg00685229	0.100532	8.59825	6.05821e-11	2.2045e-05	0.721003	0.814375	LIHC
cg00685925	-0.346875	-31.4579	1.24654e-31	4.53598e-26	0.390228	0.0413028	LIHC
cg00688681	-0.186343	-10.4558	1.82811e-13	6.65223e-08	0.341666	0.175299	LIHC
cg00723997	-0.225734	-7.10464	8.38102e-09	0.00304974	0.385663	0.192469	LIHC
cg00727483	-0.286283	-26.2318	2.34305e-28	8.52603e-23	0.318382	0.023423	LIHC
cg00729461	-0.450875	-26.6762	1.17372e-28	4.27099e-23	0.507073	0.0574552	LIHC
cg00735883	-0.187689	-8.53933	7.33048e-11	2.66746e-05	0.305198	0.108262	LIHC
cg00739467	-0.425866	-40.3977	3.23237e-36	1.17622e-30	0.464988	0.0375399	LIHC
cg00769799	-0.365473	-44.3227	6.20422e-38	2.25763e-32	0.4203	0.0548001	LIHC
cg00810519	-0.439082	-38.6796	2.04883e-35	7.45539e-30	0.467061	0.0298495	LIHC
cg00818649	-0.173963	-17.276	3.90845e-21	1.42223e-15	0.195274	0.0210537	LIHC
cg00832270	-0.407023	-48.0318	1.99132e-39	7.24613e-34	0.429595	0.0141944	LIHC
cg00849191	-0.386411	-49.8379	4.08887e-40	1.48788e-34	0.41828	0.033203	LIHC
cg00895705	-0.261893	-23.2923	2.98916e-26	1.08771e-20	0.296698	0.028533	LIHC
cg00904184	-0.341843	-37.5133	7.50467e-35	2.73085e-29	0.396611	0.0576899	LIHC
cg00935924	-0.259336	-19.1337	7.5346e-23	2.74173e-17	0.441972	0.192082	LIHC
cg00968771	-0.210887	-11.9554	2.31897e-15	8.43842e-10	0.389348	0.186646	LIHC
cg00993140	-0.333084	-19.9812	1.37336e-23	4.99747e-18	0.437895	0.110723	LIHC
cg00996177	-0.347178	-43.0947	2.05919e-37	7.49311e-32	0.365455	0.0145951	LIHC
cg01000789	-0.366369	-22.1169	2.41096e-25	8.77314e-20	0.41166	0.0375022	LIHC
cg01052065	-0.129138	-16.2818	3.69721e-20	1.34536e-14	0.158268	0.0301351	LIHC
cg01055931	0.0612771	10.7283	8.08882e-14	2.94341e-08	0.904663	0.951481	LIHC
cg01056373	-0.341561	-30.5315	4.34732e-31	1.58193e-25	0.452128	0.102626	LIHC
cg01058588	-0.376332	-34.845	1.69773e-33	6.17782e-28	0.407254	0.0251755	LIHC
cg01062269	-0.278153	-35.1411	1.18804e-33	4.32311e-28	0.302468	0.0238299	LIHC
cg01083397	-0.16053	-15.7884	1.17058e-19	4.25957e-14	0.279227	0.121871	LIHC
cg01120006	-0.301184	-25.3002	1.03245e-27	3.75695e-22	0.382315	0.0815895	LIHC
cg01120894	-0.421545	-53.3849	2.13231e-41	7.75916e-36	0.463653	0.0360282	LIHC
cg01142317	-0.216311	-27.747	2.31288e-29	8.41624e-24	0.241628	0.0200926	LIHC
cg01150083	-0.226013	-15.8219	1.08157e-19	3.93567e-14	0.25994	0.0305841	LIHC
cg01191902	-0.32624	-20.2859	7.55389e-24	2.74875e-18	0.384807	0.0528661	LIHC
cg01215118	-0.414202	-21.0511	1.73747e-24	6.32241e-19	0.478962	0.0516138	LIHC
cg01215761	-0.169192	-9.57132	2.75073e-12	1.00095e-06	0.223703	0.0352073	LIHC
cg01275664	0.10393	8.95496	1.9257e-11	7.00735e-06	0.841458	0.934569	LIHC
cg01303569	-0.347568	-35.8567	5.07243e-34	1.84579e-28	0.374861	0.0247267	LIHC
cg01318188	-0.396952	-34.4403	2.77783e-33	1.01081e-27	0.472752	0.0640676	LIHC
cg01333849	-0.0882815	-9.14563	1.04971e-11	3.81975e-06	0.12476	0.0411759	LIHC
cg01353788	-0.294853	-37.1947	1.07693e-34	3.9188e-29	0.331519	0.0375365	LIHC
cg01364818	-0.413495	-23.5841	1.80525e-26	6.56906e-21	0.446913	0.0288661	LIHC
cg01370077	-0.403331	-32.6496	2.62356e-32	9.54678e-27	0.451296	0.0356972	LIHC
cg01370179	-0.122788	-8.12099	2.86659e-10	0.000104311	0.368812	0.263669	LIHC
cg01374431	-0.325716	-23.2335	3.31135e-26	1.20495e-20	0.399388	0.0521125	LIHC
cg01397290	-0.296799	-23.9967	8.92947e-27	3.24931e-21	0.367514	0.0722793	LIHC
cg01405303	-0.378543	-27.741	2.33346e-29	8.49114e-24	0.440477	0.0537197	LIHC
cg01408682	0.127475	12.7113	2.86312e-16	1.04185e-10	0.635705	0.747458	LIHC
cg01434723	-0.271834	-26.2955	2.12049e-28	7.71617e-23	0.318075	0.044136	LIHC
cg01477427	-0.253825	-25.2392	1.13965e-27	4.14704e-22	0.296605	0.040534	LIHC
cg01483252	-0.345358	-22.5343	1.13679e-25	4.13663e-20	0.414892	0.0655871	LIHC
cg01533115	-0.251275	-24.5269	3.66829e-27	1.33484e-21	0.27296	0.0259534	LIHC
cg01538344	-0.237854	-13.9408	1.10967e-17	4.03792e-12	0.525185	0.312578	LIHC
cg01543116	-0.244737	-17.7548	1.37078e-21	4.98807e-16	0.333731	0.0823642	LIHC
cg01555661	-0.246558	-25.3391	9.6952e-28	3.52795e-22	0.305336	0.0459465	LIHC
cg01706033	-0.0792253	-7.02034	1.11229e-08	0.00404747	0.119041	0.0377445	LIHC
cg01732428	-0.0452817	-9.74992	1.57857e-12	5.74418e-07	0.0838427	0.040757	LIHC
cg01742836	-0.538312	-42.0088	6.11394e-37	2.22478e-31	0.575635	0.0307364	LIHC
cg01755617	-0.282797	-30.8514	2.81315e-31	1.02367e-25	0.324673	0.0363996	LIHC
cg01757402	-0.115696	-12.5968	3.91283e-16	1.42382e-10	0.170361	0.0559355	LIHC
cg01762011	-0.285517	-29.7577	1.2678e-30	4.61335e-25	0.383799	0.100271	LIHC
cg01773478	-0.227294	-25.663	5.76178e-28	2.09663e-22	0.267505	0.0269133	LIHC
cg01777017	-0.38369	-25.1741	1.26659e-27	4.60893e-22	0.460561	0.0710682	LIHC
cg01807728	-0.313568	-29.4408	1.97986e-30	7.20443e-25	0.338013	0.0252152	LIHC
cg01814235	0.0469989	9.34855	5.52893e-12	2.0119e-06	0.86784	0.904864	LIHC
cg01825872	-0.327619	-26.8829	8.5399e-29	3.10755e-23	0.37444	0.0399978	LIHC
cg01831199	-0.0906513	-12.7372	2.66878e-16	9.71132e-11	0.157525	0.0593226	LIHC
cg01832419	-0.297689	-31.4603	1.24242e-31	4.521e-26	0.32033	0.0205684	LIHC
cg01850541	-0.205211	-16.0847	5.84208e-20	2.12585e-14	0.301401	0.102894	LIHC
cg01857253	-0.355938	-23.6819	1.52651e-26	5.55475e-21	0.390177	0.0361521	LIHC
cg01869765	-0.440761	-29.1633	2.93524e-30	1.06809e-24	0.487992	0.0352155	LIHC
cg01891172	-0.407869	-23.9634	9.44731e-27	3.43774e-21	0.46718	0.0604546	LIHC
cg01913024	-0.22312	-19.2848	5.5384e-23	2.01535e-17	0.267349	0.0393796	LIHC
cg01913196	-0.238312	-7.50161	2.22247e-09	0.000808726	0.553492	0.305254	LIHC
cg01915804	-0.341058	-35.5364	7.40982e-34	2.69633e-28	0.366782	0.0216095	LIHC
cg01938887	-0.141746	-23.5311	1.97788e-26	7.19722e-21	0.18815	0.0429555	LIHC
cg01990854	0.0786015	8.32762	1.45847e-10	5.30717e-05	0.820776	0.890192	LIHC
cg01992935	-0.265627	-10.4081	2.1104e-13	7.67945e-08	0.668453	0.423469	LIHC
cg01996818	-0.25865	-22.7234	8.11749e-26	2.95384e-20	0.313155	0.0535003	LIHC
cg01997410	-0.149407	-10.8976	4.89882e-14	1.78261e-08	0.184857	0.0240358	LIHC
cg01999076	-0.253699	-17.6542	1.70503e-21	6.20436e-16	0.313758	0.0589734	LIHC
cg02004156	-0.266104	-26.1518	2.65625e-28	9.66571e-23	0.346982	0.0743749	LIHC
cg02010442	-0.252862	-23.886	1.0774e-26	3.92052e-21	0.30487	0.0495061	LIHC
cg02031980	-0.134062	-15.6651	1.56766e-19	5.70449e-14	0.167448	0.0307027	LIHC
cg02035866	-0.221235	-23.2167	3.40993e-26	1.24083e-20	0.241061	0.0221271	LIHC
cg02049865	-0.402497	-40.2101	3.93976e-36	1.43362e-30	0.463015	0.0519774	LIHC
cg02062238	-0.267291	-17.3129	3.60266e-21	1.31096e-15	0.29871	0.0365087	LIHC
cg02127807	-0.20236	-19.6997	2.40172e-23	8.73954e-18	0.264848	0.0683179	LIHC
cg02157475	-0.365327	-37.3976	8.55326e-35	3.11241e-29	0.43133	0.0693007	LIHC
cg02161125	-0.309126	-26.064	3.04998e-28	1.10984e-22	0.357081	0.0375942	LIHC
cg02161919	-0.289514	-14.9785	8.21339e-19	2.98874e-13	0.346242	0.0496815	LIHC
cg02195366	-0.451492	-43.8131	1.01667e-37	3.69952e-32	0.483209	0.0257539	LIHC
cg02210067	-0.150732	-17.3095	3.62989e-21	1.32087e-15	0.228541	0.0725842	LIHC
cg02214597	-0.26511	-24.6486	2.99831e-27	1.09104e-21	0.307296	0.0376964	LIHC
cg02223323	-0.222259	-19.9323	1.51264e-23	5.5043e-18	0.293526	0.0753627	LIHC
cg02229344	-0.215306	-19.6353	2.73145e-23	9.93936e-18	0.311204	0.0942332	LIHC
cg02274705	-0.335689	-35.1739	1.14221e-33	4.15634e-28	0.421108	0.0836172	LIHC
cg02276461	-0.346993	-25.3185	1.00236e-27	3.64745e-22	0.480916	0.123409	LIHC
cg02283535	-0.422462	-29.9696	9.43426e-31	3.43299e-25	0.488637	0.0616199	LIHC
cg02285254	-0.248967	-23.6869	1.51349e-26	5.50737e-21	0.310757	0.0648442	LIHC
cg02288667	-0.360349	-38.0313	4.19649e-35	1.52704e-29	0.413186	0.0487311	LIHC
cg02291897	-0.319059	-33.8765	5.56629e-33	2.02549e-27	0.35565	0.024136	LIHC
cg02293258	-0.263254	-21.0477	1.74877e-24	6.36353e-19	0.312519	0.040334	LIHC
cg02295369	-0.243363	-12.8354	2.04534e-16	7.44271e-11	0.615255	0.382183	LIHC
cg02295504	-0.407742	-24.4878	3.91502e-27	1.42462e-21	0.446533	0.0388505	LIHC
cg02327549	-0.142738	-12.794	2.28757e-16	8.32415e-11	0.20291	0.0692456	LIHC
cg02330362	-0.297519	-31.1142	1.97363e-31	7.18177e-26	0.363512	0.0550413	LIHC
cg02333283	-0.463969	-51.5488	9.59881e-41	3.49287e-35	0.495882	0.022615	LIHC
cg02337670	-0.265073	-42.1927	5.07573e-37	1.84699e-31	0.289222	0.0240678	LIHC
cg02360578	-0.289145	-21.846	3.9525e-25	1.43826e-19	0.346704	0.0524969	LIHC
cg02386310	-0.236865	-30.2957	6.00817e-31	2.18629e-25	0.275694	0.0381853	LIHC
cg02417823	-0.131898	-17.4117	2.89792e-21	1.05451e-15	0.180691	0.0555345	LIHC
cg02480419	-0.300106	-42.0899	5.63155e-37	2.04924e-31	0.331846	0.0258064	LIHC
cg02510708	-0.430347	-35.1239	1.2129e-33	4.41356e-28	0.475341	0.0427882	LIHC
cg02533866	-0.312881	-18.4629	3.02528e-22	1.10086e-16	0.3835	0.0685264	LIHC
cg02538330	-0.209798	-21.2492	1.19614e-24	4.35259e-19	0.239048	0.0318521	LIHC
cg02540826	-0.298026	-42.0438	5.90127e-37	2.14739e-31	0.328655	0.0285946	LIHC
cg02600772	0.165473	7.09836	8.55949e-09	0.00311468	0.656146	0.823266	LIHC
cg02602182	0.184924	12.2186	1.11023e-15	4.03998e-10	0.301954	0.46609	LIHC
cg02602528	-0.236006	-20.0457	1.20941e-23	4.40086e-18	0.296986	0.0517943	LIHC
cg02615131	-0.490855	-41.0093	1.70524e-36	6.20515e-31	0.556396	0.0587207	LIHC
cg02621658	-0.377346	-26.3077	2.0805e-28	7.57066e-23	0.437606	0.0478859	LIHC
cg02623256	-0.300358	-24.6609	2.93791e-27	1.06907e-21	0.326926	0.0196688	LIHC
cg02634083	-0.358401	-37.3611	8.91521e-35	3.24412e-29	0.439214	0.0818006	LIHC
cg02714202	-0.196356	-18.5003	2.79695e-22	1.01777e-16	0.289306	0.0844923	LIHC
cg02772106	-0.446907	-42.0242	6.01942e-37	2.19038e-31	0.532018	0.0834168	LIHC
cg02775175	-0.349451	-31.1356	1.91765e-31	6.97806e-26	0.402037	0.0438958	LIHC
cg02803670	-0.187726	-22.701	8.44621e-26	3.07346e-20	0.227975	0.0374489	LIHC
cg02821380	-0.227322	-29.1369	3.04789e-30	1.10908e-24	0.263858	0.0320288	LIHC
cg02859554	-0.207306	-12.6909	3.02689e-16	1.10144e-10	0.258369	0.0480188	LIHC
cg02864732	-0.32569	-23.4841	2.14481e-26	7.80468e-21	0.464778	0.135269	LIHC
cg02869694	-0.459734	-38.1035	3.87203e-35	1.40898e-29	0.511688	0.0411622	LIHC
cg02875834	-0.114648	-13.4759	3.71156e-17	1.35058e-11	0.136727	0.0272401	LIHC
cg02883100	-0.2419	-16.6456	1.60623e-20	5.84483e-15	0.46456	0.229396	LIHC
cg02894810	0.0908966	6.40002	8.99473e-08	0.0327306	0.726958	0.80699	LIHC
cg02909397	-0.21438	-25.3544	9.45772e-28	3.44153e-22	0.253313	0.0340901	LIHC
cg02921434	-0.378776	-35.3753	8.97639e-34	3.26638e-28	0.428766	0.0434522	LIHC
cg02932805	-0.168775	-11.3378	1.35235e-14	4.92101e-09	0.193542	0.0265156	LIHC
cg02937293	-0.336467	-28.9002	4.2774e-30	1.55649e-24	0.413927	0.0725959	LIHC
cg02938958	-0.227363	-16.0347	6.56467e-20	2.38879e-14	0.301615	0.0768883	LIHC
cg02939364	-0.12967	-9.05752	1.38876e-11	5.05349e-06	0.166209	0.03371	LIHC
cg02971902	-0.281427	-41.7808	7.71001e-37	2.80556e-31	0.312042	0.0269551	LIHC
cg02994943	-0.39526	-29.054	3.43094e-30	1.24847e-24	0.464478	0.063436	LIHC
cg02997061	-0.0898873	-7.16094	6.93907e-09	0.00252503	0.17112	0.072989	LIHC
cg03024957	-0.303408	-25.9581	3.60443e-28	1.3116e-22	0.341382	0.0393778	LIHC
cg03056321	-0.247618	-13.0321	1.20443e-16	4.38274e-11	0.351231	0.0990069	LIHC
cg03100923	-0.2427	-13.7779	1.68931e-17	6.14718e-12	0.303189	0.0511855	LIHC
cg03104298	-0.304744	-26.3864	1.84004e-28	6.69564e-23	0.421674	0.114777	LIHC
cg03128268	-0.130147	-8.93871	2.02828e-11	7.38064e-06	0.366175	0.244941	LIHC
cg03139204	-0.0961062	-7.60709	1.56467e-09	0.000569363	0.275452	0.191874	LIHC
cg03140487	0.0885096	7.77259	9.03684e-10	0.000328838	0.391761	0.457537	LIHC
cg03171708	-0.252811	-25.3605	9.36585e-28	3.4081e-22	0.309068	0.0447123	LIHC
cg03177323	-0.0678799	-7.18414	6.42004e-09	0.00233616	0.10786	0.0411189	LIHC
cg03189022	-0.182776	-17.7439	1.40351e-21	5.10718e-16	0.277741	0.0915103	LIHC
cg03202526	-0.358607	-20.0063	1.30692e-23	4.7557e-18	0.465862	0.11857	LIHC
cg03213202	-0.24545	-16.3237	3.35661e-20	1.22142e-14	0.305018	0.0555526	LIHC
cg03219705	-0.331653	-37.6086	6.73918e-35	2.45229e-29	0.400992	0.0622465	LIHC
cg03244432	-0.265437	-34.8815	1.62426e-33	5.91045e-28	0.288348	0.0176731	LIHC
cg03245429	0.180186	16.9697	7.73007e-21	2.81286e-15	0.773422	0.940201	LIHC
cg03272642	-0.349037	-23.6228	1.68921e-26	6.14679e-21	0.386227	0.032146	LIHC
cg03280420	-0.253429	-26.4936	1.5573e-28	5.66681e-23	0.296461	0.0386867	LIHC
cg03315431	0.126087	9.28055	6.85035e-12	2.49275e-06	0.648102	0.761998	LIHC
cg03334316	-0.461379	-40.9183	1.87454e-36	6.82118e-31	0.501917	0.0382338	LIHC
cg03335173	-0.370835	-11.2104	1.95789e-14	7.12448e-09	0.416541	0.0529893	LIHC
cg03347749	-0.277396	-24.1469	6.928e-27	2.521e-21	0.318911	0.0405143	LIHC
cg03360374	-0.164959	-17.7717	1.32147e-21	4.80865e-16	0.227327	0.065021	LIHC
cg03363535	-0.345863	-28.5486	7.10901e-30	2.58687e-24	0.409349	0.0567251	LIHC
cg03364121	-0.250816	-22.253	1.88434e-25	6.85684e-20	0.325498	0.0631527	LIHC
cg03370193	-0.393119	-30.2737	6.19276e-31	2.25346e-25	0.444182	0.0512485	LIHC
cg03391801	-0.456163	-26.0016	3.3652e-28	1.22455e-22	0.492982	0.0384242	LIHC
cg03440272	-0.34737	-27.3539	4.17102e-29	1.51778e-23	0.395162	0.0478299	LIHC
cg03513471	-0.267114	-25.1171	1.38971e-27	5.05695e-22	0.295364	0.0217304	LIHC
cg03517379	-0.276793	-34.1663	3.88893e-33	1.41513e-27	0.33582	0.055054	LIHC
cg03523199	-0.203068	-22.8661	6.30586e-26	2.29461e-20	0.23789	0.0293852	LIHC
cg03580328	-0.290165	-20.6246	3.91982e-24	1.42637e-18	0.321389	0.0266064	LIHC
cg03605032	-0.36029	-34.1631	3.90452e-33	1.4208e-27	0.382364	0.0184898	LIHC
cg03670113	-0.401084	-39.7628	6.3395e-36	2.30685e-30	0.515701	0.101176	LIHC
cg03672915	-0.148397	-7.85687	6.83863e-10	0.000248848	0.200211	0.0355773	LIHC
cg03675615	0.187636	9.20447	8.71202e-12	3.17018e-06	0.452884	0.624222	LIHC
cg03679269	-0.292506	-29.6092	1.56135e-30	5.68152e-25	0.325211	0.0253234	LIHC
cg03691313	-0.384024	-51.5319	9.7352e-41	3.5425e-35	0.419573	0.0320756	LIHC
cg03705894	-0.324906	-25.1748	1.26517e-27	4.60378e-22	0.365561	0.0338621	LIHC
cg03717198	-0.133994	-11.5964	6.42453e-15	2.3378e-09	0.222945	0.0980307	LIHC
cg03718079	-0.200048	-17.5136	2.31735e-21	8.43251e-16	0.269441	0.0628122	LIHC
cg03728850	-0.147372	-12.239	1.04904e-15	3.81733e-10	0.203279	0.0434301	LIHC
cg03730082	-0.359458	-41.0108	1.7027e-36	6.1959e-31	0.388675	0.0334988	LIHC
cg03748372	-0.353598	-34.9147	1.56047e-33	5.67834e-28	0.425412	0.0655337	LIHC
cg03751162	-0.28596	-16.5632	1.93789e-20	7.05169e-15	0.345904	0.0500068	LIHC
cg03752015	-0.154831	-11.3823	1.18907e-14	4.32686e-09	0.193227	0.0286848	LIHC
cg03754195	-0.148952	-14.3835	3.59984e-18	1.30993e-12	0.205483	0.059386	LIHC
cg03757053	0.0634061	8.09731	3.09811e-10	0.000112736	0.893517	0.952249	LIHC
cg03759948	-0.321931	-28.3293	9.78775e-30	3.56162e-24	0.382868	0.0528983	LIHC
cg03769817	-0.296609	-28.3263	9.83064e-30	3.57723e-24	0.447887	0.155848	LIHC
cg03802424	-0.228291	-24.5705	3.41228e-27	1.24168e-21	0.270565	0.0433686	LIHC
cg03806192	-0.393537	-27.3531	4.17618e-29	1.51965e-23	0.58733	0.182473	LIHC
cg03825574	-0.323624	-39.0069	1.43259e-35	5.21299e-30	0.395153	0.0716475	LIHC
cg03831206	-0.234295	-30.625	3.82663e-31	1.39246e-25	0.284334	0.0372243	LIHC
cg03832506	0.161855	12.634	3.53482e-16	1.28627e-10	0.780785	0.919586	LIHC
cg03892808	-0.308461	-22.4109	1.41806e-25	5.16012e-20	0.337363	0.0285593	LIHC
cg03894002	-0.286774	-23.1567	3.78615e-26	1.37773e-20	0.369428	0.0735742	LIHC
cg03900860	-0.39758	-39.7579	6.3722e-36	2.31875e-30	0.432011	0.0277791	LIHC
cg03905487	-0.401858	-51.2154	1.26839e-40	4.61549e-35	0.44612	0.0371303	LIHC
cg03906572	-0.32541	-34.022	4.64775e-33	1.69125e-27	0.372083	0.0407091	LIHC
cg03944921	-0.41869	-49.4905	5.5206e-40	2.00887e-34	0.475355	0.0541572	LIHC
cg03959273	-0.182898	-15.5067	2.28677e-19	8.32125e-14	0.390296	0.20458	LIHC
cg03971283	-0.103957	-10.7471	7.64935e-14	2.78349e-08	0.144664	0.0401555	LIHC
cg03971469	-0.0966429	-11.3797	1.19805e-14	4.35952e-09	0.132874	0.0286846	LIHC
cg03983969	-0.294147	-33.8396	5.82749e-33	2.12054e-27	0.325311	0.0260753	LIHC
cg03989304	-0.329526	-28.3511	9.48103e-30	3.45001e-24	0.405457	0.0718979	LIHC
cg04026379	-0.392167	-21.4511	8.20035e-25	2.98399e-19	0.49303	0.084756	LIHC
cg04027312	-0.407341	-42.1308	5.40356e-37	1.96628e-31	0.438649	0.0209994	LIHC
cg04029282	-0.20288	-21.4936	7.57805e-25	2.75755e-19	0.26752	0.0626822	LIHC
cg04031645	-0.194027	-14.5074	2.63736e-18	9.59698e-13	0.244493	0.0500044	LIHC
cg04037732	-0.246159	-11.9142	2.60436e-15	9.47691e-10	0.4367	0.204119	LIHC
cg04061482	-0.221714	-17.3306	3.46452e-21	1.26069e-15	0.619252	0.376792	LIHC
cg04075675	-0.295459	-33.8446	5.79127e-33	2.10736e-27	0.322278	0.0254064	LIHC
cg04094482	-0.425783	-31.0265	2.2206e-31	8.08046e-26	0.468486	0.0452525	LIHC
cg04128303	-0.373399	-24.0564	8.07069e-27	2.93681e-21	0.463678	0.0937296	LIHC
cg04149024	-0.417195	-53.6897	1.66928e-41	6.07429e-36	0.460787	0.0397967	LIHC
cg04166210	-0.144329	-12.6834	3.08907e-16	1.12407e-10	0.205208	0.0591815	LIHC
cg04167532	-0.0817213	-8.35139	1.34974e-10	4.91153e-05	0.166007	0.0728715	LIHC
cg04190662	-0.195856	-17.4346	2.75565e-21	1.00274e-15	0.249938	0.0672724	LIHC
cg04216286	-0.188291	-15.0064	7.67097e-19	2.79136e-13	0.235737	0.0314011	LIHC
cg04225046	-0.375306	-34.0492	4.49383e-33	1.63524e-27	0.401596	0.025619	LIHC
cg04288012	-0.216699	-29.1653	2.92706e-30	1.06512e-24	0.245367	0.0271654	LIHC
cg04290452	-0.0268493	-7.24117	5.30362e-09	0.00192991	0.0511031	0.027538	LIHC
cg04292836	-0.306127	-21.1762	1.37225e-24	4.99344e-19	0.338758	0.0292078	LIHC
cg04298609	-0.219472	-28.5592	7.00067e-30	2.54744e-24	0.251323	0.0274519	LIHC
cg04301343	-0.091182	-6.74321	2.82611e-08	0.0102838	0.334352	0.257518	LIHC
cg04302178	-0.393133	-34.6606	2.12333e-33	7.72649e-28	0.425799	0.0315549	LIHC
cg04317640	-0.426464	-27.6026	2.86951e-29	1.04418e-23	0.473219	0.0420637	LIHC
cg04327763	-0.392764	-41.895	6.86359e-37	2.49756e-31	0.448462	0.054893	LIHC
cg04344997	-0.310143	-24.1547	6.83765e-27	2.48813e-21	0.34763	0.0332387	LIHC
cg04371001	-0.399516	-52.6662	3.81915e-41	1.38973e-35	0.509498	0.107606	LIHC
cg04376185	-0.378729	-42.6793	3.11264e-37	1.13264e-31	0.41528	0.0386677	LIHC
cg04388383	-0.353592	-37.0097	1.33013e-34	4.84016e-29	0.413023	0.0552952	LIHC
cg04402486	-0.304646	-20.3409	6.78696e-24	2.46968e-18	0.367937	0.050783	LIHC
cg04406445	-0.29099	-27.7169	2.41915e-29	8.80295e-24	0.459118	0.175219	LIHC
cg04419618	-0.335385	-30.1245	7.60939e-31	2.76895e-25	0.416248	0.0779677	LIHC
cg04424654	-0.267618	-17.1637	5.01353e-21	1.82435e-15	0.290691	0.0315113	LIHC
cg04428826	-0.143481	-6.73112	2.94363e-08	0.0107114	0.745116	0.589969	LIHC
cg04481865	-0.256156	-12.811	2.18481e-16	7.95023e-11	0.342231	0.0901012	LIHC
cg04524851	-0.389749	-40.0747	4.54766e-36	1.65483e-30	0.417499	0.0234117	LIHC
cg04552106	-0.366648	-30.1615	7.22993e-31	2.63087e-25	0.403632	0.0257545	LIHC
cg04624564	0.260467	26.4979	1.54695e-28	5.62915e-23	0.683505	0.945035	LIHC
cg04626171	-0.309932	-45.2704	2.51155e-38	9.1392e-33	0.341906	0.0312537	LIHC
cg04630982	-0.153614	-12.2157	1.11933e-15	4.07307e-10	0.290621	0.162421	LIHC
cg04646630	0.0683289	7.36426	3.51412e-09	0.00127874	0.900513	0.955915	LIHC
cg04647039	-0.144348	-13.5286	3.23289e-17	1.1764e-11	0.207535	0.0635343	LIHC
cg04650971	-0.384992	-43.3631	1.57986e-37	5.7489e-32	0.419925	0.0360226	LIHC
cg04663649	-0.178111	-14.8678	1.07799e-18	3.92265e-13	0.230526	0.0500276	LIHC
cg04665139	-0.329827	-20.2256	8.49688e-24	3.0919e-18	0.358604	0.0382977	LIHC
cg04675919	-0.325496	-28.2688	1.06946e-29	3.89162e-24	0.397262	0.0565071	LIHC
cg04691867	-0.275241	-38.4485	2.64196e-35	9.61372e-30	0.309377	0.0390528	LIHC
cg04702045	-0.251678	-18.8786	1.2725e-22	4.63045e-17	0.284633	0.0267705	LIHC
cg04712194	-0.392014	-48.3671	1.47778e-39	5.37745e-34	0.453127	0.056568	LIHC
cg04716051	-0.240882	-16.2663	3.83267e-20	1.39465e-14	0.271858	0.0308263	LIHC
cg04730443	0.178009	10.5921	1.21452e-13	4.41946e-08	0.519142	0.671639	LIHC
cg04734394	-0.346602	-41.9662	6.3843e-37	2.32316e-31	0.392466	0.0414268	LIHC
cg04739874	-0.264454	-22.2961	1.74324e-25	6.34342e-20	0.29968	0.0282147	LIHC
cg04744025	-0.212352	-23.9295	1.00071e-26	3.64146e-21	0.256042	0.0395773	LIHC
cg04748497	-0.260838	-27.1132	6.00775e-29	2.18613e-23	0.309469	0.0480116	LIHC
cg04752574	-0.270465	-18.1907	5.37876e-22	1.95725e-16	0.382811	0.108915	LIHC
cg04763286	-0.274073	-19.0411	9.10703e-23	3.31392e-17	0.34638	0.0642563	LIHC
cg04777541	0.180456	18.3718	3.66499e-22	1.33364e-16	0.699443	0.863503	LIHC
cg04836978	-0.299813	-24.393	4.58553e-27	1.66861e-21	0.388964	0.0809215	LIHC
cg04855977	-0.208891	-19.3159	5.19876e-23	1.89176e-17	0.288966	0.073147	LIHC
cg04856605	-0.276637	-29.1252	3.09908e-30	1.12771e-24	0.359575	0.0771311	LIHC
cg04924736	-0.346535	-26.8865	8.49344e-29	3.09064e-23	0.40727	0.0519329	LIHC
cg05032098	-0.135193	-17.0778	6.07002e-21	2.20879e-15	0.311434	0.173537	LIHC
cg05032353	-0.129399	-10.7446	7.70762e-14	2.80469e-08	0.188139	0.0606507	LIHC
cg05032903	-0.391057	-28.3991	8.83785e-30	3.21597e-24	0.432493	0.0595531	LIHC
cg05045028	-0.196688	-23.5351	1.96432e-26	7.14788e-21	0.233686	0.0291204	LIHC
cg05045659	0.0806285	10.5457	1.39535e-13	5.07749e-08	0.842069	0.911649	LIHC
cg05049545	-0.372269	-33.8052	6.08263e-33	2.21338e-27	0.40811	0.0296247	LIHC
cg05059648	-0.322671	-27.4357	3.687e-29	1.34165e-23	0.440069	0.112177	LIHC
cg05064925	-0.318282	-13.7953	1.61473e-17	5.87577e-12	0.39523	0.0786325	LIHC
cg05086798	-0.329168	-24.4511	4.16167e-27	1.51437e-21	0.412907	0.0795101	LIHC
cg05091873	-0.353262	-28.8367	4.68673e-30	1.70543e-24	0.394252	0.037803	LIHC
cg05096434	-0.267515	-25.8693	4.14891e-28	1.50973e-22	0.30663	0.029193	LIHC
cg05096731	-0.10578	-11.0588	3.04909e-14	1.10952e-08	0.135652	0.0343494	LIHC
cg05100261	-0.312134	-28.9583	3.93524e-30	1.43198e-24	0.333166	0.0207635	LIHC
cg05104476	-0.180291	-17.2306	4.32119e-21	1.57242e-15	0.2578	0.0741884	LIHC
cg05109619	-0.415033	-29.6551	1.46396e-30	5.32714e-25	0.462458	0.0369107	LIHC
cg05114100	0.263388	15.6506	1.62241e-19	5.90372e-14	0.613777	0.864756	LIHC
cg05127178	-0.196359	-12.7253	2.75599e-16	1.00287e-10	0.287548	0.0880206	LIHC
cg05134041	-0.330265	-19.6837	2.4798e-23	9.02365e-18	0.557482	0.244548	LIHC
cg05147108	-0.197208	-10.7994	6.54936e-14	2.38322e-08	0.232571	0.0336204	LIHC
cg05184682	-0.301321	-16.9428	8.21069e-21	2.98776e-15	0.3411	0.0382804	LIHC
cg05200254	-0.32608	-27.477	3.46506e-29	1.26089e-23	0.377119	0.046512	LIHC
cg05219621	0.139909	9.09198	1.24463e-11	4.52904e-06	0.488667	0.605528	LIHC
cg05222959	-0.215268	-29.141	3.02989e-30	1.10254e-24	0.242883	0.0220561	LIHC
cg05223760	-0.31662	-30.9104	2.59736e-31	9.45142e-26	0.349696	0.0397523	LIHC
cg05237970	-0.220411	-14.6199	1.99155e-18	7.24698e-13	0.286591	0.052285	LIHC
cg05239680	-0.243316	-16.5726	1.89697e-20	6.90282e-15	0.519931	0.262608	LIHC
cg05242815	-0.284528	-20.3137	7.15617e-24	2.60403e-18	0.355955	0.0636011	LIHC
cg05288927	-0.260614	-13.1985	7.72392e-17	2.81063e-11	0.326261	0.0491511	LIHC
cg05370638	-0.330292	-31.5669	1.07844e-31	3.9243e-26	0.357183	0.0274938	LIHC
cg05374090	-0.459512	-53.173	2.53006e-41	9.20653e-36	0.496193	0.0320446	LIHC
cg05379196	-0.259929	-19.4143	4.26017e-23	1.55021e-17	0.304189	0.0422376	LIHC
cg05397816	-0.394423	-33.383	1.03194e-32	3.75507e-27	0.464638	0.053331	LIHC
cg05424879	-0.34248	-29.7931	1.20666e-30	4.39086e-25	0.381589	0.0331129	LIHC
cg05438092	-0.409774	-41.9611	6.41755e-37	2.33526e-31	0.452872	0.0368216	LIHC
cg05442715	-0.221493	-18.7619	1.62038e-22	5.89635e-17	0.24713	0.020159	LIHC
cg05445331	-0.198289	-15.7387	1.31655e-19	4.79073e-14	0.229249	0.0320002	LIHC
cg05449830	-0.105157	-9.3233	5.98649e-12	2.1784e-06	0.139113	0.0252387	LIHC
cg05453458	-0.237374	-22.9382	5.55295e-26	2.02064e-20	0.281086	0.0362168	LIHC
cg05454424	0.195335	18.7904	1.52727e-22	5.55752e-17	0.751633	0.946094	LIHC
cg05456652	0.248575	19.47	3.80744e-23	1.38547e-17	0.604834	0.836881	LIHC
cg05461361	-0.364506	-36.5709	2.20328e-34	8.01744e-29	0.390332	0.019024	LIHC
cg05474077	-0.123987	-9.15497	1.0191e-11	3.70835e-06	0.165348	0.0314103	LIHC
cg05476089	-0.426472	-45.8309	1.48386e-38	5.39957e-33	0.497972	0.0663606	LIHC
cg05476522	-0.369176	-30.0763	8.13498e-31	2.96021e-25	0.461142	0.0999821	LIHC
cg05526804	-0.232768	-26.4356	1.70439e-28	6.20203e-23	0.255315	0.0207753	LIHC
cg05532720	0.12423	9.63979	2.22216e-12	8.08614e-07	0.806908	0.928018	LIHC
cg05533223	0.339555	44.8705	3.67026e-38	1.33556e-32	0.571726	0.910999	LIHC
cg05551025	-0.175792	-11.1097	2.62681e-14	9.55859e-09	0.225088	0.0530878	LIHC
cg05572834	-0.0694995	-8.19669	2.23692e-10	8.13983e-05	0.119226	0.0632032	LIHC
cg05605384	-0.18153	-14.1654	6.25043e-18	2.27444e-12	0.214583	0.0338929	LIHC
cg05630320	-0.207355	-18.7528	1.65108e-22	6.00806e-17	0.231928	0.0254305	LIHC
cg05679489	-0.0702675	-7.74027	1.00578e-09	0.000365988	0.112642	0.0421209	LIHC
cg05692422	0.158088	17.0448	6.53355e-21	2.37747e-15	0.816787	0.966436	LIHC
cg05704524	-0.351167	-46.9415	5.3251e-39	1.93773e-33	0.40445	0.0515678	LIHC
cg05782106	-0.16161	-12.0182	1.94376e-15	7.07309e-10	0.186717	0.0345338	LIHC
cg05785344	-0.365254	-41.6416	8.88776e-37	3.23413e-31	0.405288	0.0326036	LIHC
cg05788681	-0.329753	-15.9957	7.19011e-20	2.61638e-14	0.38682	0.0718689	LIHC
cg05799859	-0.439962	-39.6178	7.40368e-36	2.6941e-30	0.481735	0.0390356	LIHC
cg05803370	-0.393038	-37.7622	5.67019e-35	2.0633e-29	0.426526	0.0252956	LIHC
cg05803913	-0.361098	-24.7944	2.35685e-27	8.57624e-22	0.391287	0.0244021	LIHC
cg05806018	-0.5083	-46.892	5.5708e-39	2.02714e-33	0.552659	0.0353102	LIHC
cg05835545	-0.257663	-24.1656	6.71297e-27	2.44276e-21	0.295453	0.0310869	LIHC
cg05849149	-0.195225	-9.3951	4.77619e-12	1.73799e-06	0.454772	0.259157	LIHC
cg05849875	-0.314316	-21.761	4.62064e-25	1.68139e-19	0.381297	0.0677317	LIHC
cg05872222	-0.166925	-18.3192	4.09581e-22	1.49041e-16	0.207447	0.0381998	LIHC
cg05893072	-0.284979	-23.1623	3.74893e-26	1.36418e-20	0.312097	0.0339335	LIHC
cg05899999	-0.314458	-27.6741	2.57861e-29	9.38322e-24	0.346604	0.022902	LIHC
cg05905814	-0.271956	-28.6864	5.82143e-30	2.11834e-24	0.305169	0.0324067	LIHC
cg05908188	-0.332098	-40.5234	2.83206e-36	1.03055e-30	0.359385	0.0266384	LIHC
cg05935584	-0.424119	-39.0818	1.32062e-35	4.80554e-30	0.455421	0.0226264	LIHC
cg05941375	-0.289218	-34.0505	4.48672e-33	1.63266e-27	0.485942	0.189525	LIHC
cg05950094	-0.143125	-12.8382	2.02976e-16	7.38602e-11	0.204517	0.0631168	LIHC
cg05958126	-0.373622	-37.9392	4.65074e-35	1.69234e-29	0.438646	0.0620294	LIHC
cg05994819	-0.322787	-22.6928	8.57098e-26	3.11886e-20	0.354791	0.0232181	LIHC
cg05996419	-0.341245	-29.042	3.49057e-30	1.27017e-24	0.377403	0.0254926	LIHC
cg06022838	-0.0521668	-8.58204	6.38418e-11	2.32311e-05	0.0861284	0.0316584	LIHC
cg06039729	-0.255433	-16.6191	1.70626e-20	6.20883e-15	0.294823	0.0307426	LIHC
cg06041068	-0.445027	-25.429	8.38695e-28	3.05189e-22	0.491364	0.0441098	LIHC
cg06042004	-0.487555	-36.9202	1.47365e-34	5.36241e-29	0.562599	0.0690031	LIHC
cg06051391	-0.314321	-29.0758	3.32549e-30	1.2101e-24	0.341846	0.0224535	LIHC
cg06055478	-0.422974	-30.0555	8.37292e-31	3.04679e-25	0.48421	0.0538824	LIHC
cg06069996	-0.135296	-12.6515	3.36985e-16	1.22624e-10	0.202113	0.0616284	LIHC
cg06072560	-0.27283	-26.5754	1.37175e-28	4.99161e-23	0.304478	0.0245125	LIHC
cg06079963	-0.366259	-29.6936	1.38701e-30	5.04714e-25	0.402246	0.0351801	LIHC
cg06093412	-0.221676	-19.1644	7.07644e-23	2.57502e-17	0.248478	0.020366	LIHC
cg06097615	-0.321636	-42.0453	5.8923e-37	2.14413e-31	0.349947	0.0280189	LIHC
cg06098232	-0.216809	-28.8799	4.40428e-30	1.60266e-24	0.2397	0.0204976	LIHC
cg06104510	-0.148257	-20.2577	7.98074e-24	2.90408e-18	0.177726	0.0354752	LIHC
cg06104959	-0.218994	-22.8284	6.73994e-26	2.45257e-20	0.271682	0.0516085	LIHC
cg06124711	-0.32844	-33.1406	1.40178e-32	5.10088e-27	0.361404	0.0258177	LIHC
cg06131666	0.139323	8.06802	3.4109e-10	0.000124118	0.458977	0.586191	LIHC
cg06135529	-0.267527	-22.8782	6.17203e-26	2.24592e-20	0.320765	0.0468964	LIHC
cg06136002	-0.415363	-37.4528	8.03587e-35	2.92414e-29	0.452667	0.028034	LIHC
cg06139288	-0.382675	-25.1576	1.30109e-27	4.73449e-22	0.45331	0.0775822	LIHC
cg06144825	-0.159432	-13.3703	4.9012e-17	1.78348e-11	0.229617	0.0596087	LIHC
cg06144999	-0.38128	-31.9601	6.42143e-32	2.33667e-26	0.431755	0.0441127	LIHC
cg06158088	-0.36783	-42.7679	2.84926e-37	1.03681e-31	0.414202	0.0397167	LIHC
cg06164717	-0.358135	-25.6916	5.5048e-28	2.00312e-22	0.429752	0.066238	LIHC
cg06172626	-0.316997	-35.8623	5.03866e-34	1.8335e-28	0.412279	0.0913813	LIHC
cg06174815	-0.272438	-29.2248	2.68919e-30	9.78559e-25	0.339969	0.058141	LIHC
cg06185870	-0.357932	-36.4822	2.44185e-34	8.88554e-29	0.419653	0.064163	LIHC
cg06206449	-0.248846	-17.3156	3.58088e-21	1.30303e-15	0.326441	0.0735108	LIHC
cg06252876	-0.179096	-21.6903	5.26333e-25	1.91525e-19	0.211153	0.0236635	LIHC
cg06266461	-0.421134	-41.8283	7.34568e-37	2.67299e-31	0.454892	0.0246649	LIHC
cg06272245	-0.196318	-15.1922	4.87806e-19	1.77506e-13	0.339972	0.152914	LIHC
cg06282524	-0.156541	-9.33818	5.71243e-12	2.07867e-06	0.233784	0.0861478	LIHC
cg06295352	-0.328631	-16.2922	3.60995e-20	1.31361e-14	0.370686	0.0347393	LIHC
cg06297686	-0.368028	-26.6568	1.2094e-28	4.40083e-23	0.388355	0.0256663	LIHC
cg06302025	-0.315068	-16.1386	5.15316e-20	1.87516e-14	0.334043	0.0362235	LIHC
cg06376033	-0.136112	-14.0572	8.23563e-18	2.99683e-12	0.308175	0.170729	LIHC
cg06408025	-0.292593	-24.9766	1.74781e-27	6.36004e-22	0.354384	0.0588833	LIHC
cg06408185	-0.159033	-9.46225	3.86874e-12	1.40778e-06	0.185409	0.0251503	LIHC
cg06408301	-0.298995	-24.1496	6.89646e-27	2.50953e-21	0.352863	0.0584108	LIHC
cg06411441	-0.166564	-22.6164	9.81881e-26	3.57293e-20	0.19234	0.01998	LIHC
cg06428288	-0.183223	-11.428	1.04216e-14	3.79228e-09	0.232069	0.0470682	LIHC
cg06443675	-0.24867	-22.777	7.38176e-26	2.68612e-20	0.302981	0.0543674	LIHC
cg06464066	-0.211105	-29.8424	1.12628e-30	4.09836e-25	0.240388	0.0270429	LIHC
cg06467636	0.174257	9.58017	2.67584e-12	9.73699e-07	0.529587	0.685843	LIHC
cg06469252	-0.291259	-33.9201	5.27317e-33	1.91883e-27	0.333708	0.0466556	LIHC
cg06510592	-0.443013	-38.1172	3.81386e-35	1.38781e-29	0.522566	0.073642	LIHC
cg06511189	-0.172631	-19.9783	1.38116e-23	5.02584e-18	0.19181	0.0207073	LIHC
cg06521531	-0.316617	-21.341	1.0072e-24	3.66505e-19	0.413463	0.098125	LIHC
cg06535161	-0.295126	-21.9242	3.42482e-25	1.24624e-19	0.337491	0.0425718	LIHC
cg06540859	-0.463626	-57.3077	1.00729e-42	3.66537e-37	0.50666	0.0360411	LIHC
cg06551391	-0.220008	-20.949	2.10859e-24	7.67285e-19	0.247347	0.0229263	LIHC
cg06558166	-0.393851	-43.2252	1.80987e-37	6.58588e-32	0.432272	0.0392094	LIHC
cg06615444	-0.405311	-56.0619	2.59628e-42	9.44748e-37	0.449104	0.0398454	LIHC
cg06616857	-0.424373	-50.9612	1.57063e-40	5.71531e-35	0.467286	0.0333488	LIHC
cg06624970	-0.364569	-29.461	1.92395e-30	7.00099e-25	0.42543	0.0625785	LIHC
cg06630839	-0.169236	-12.291	9.07927e-16	3.30382e-10	0.218616	0.0435663	LIHC
cg06649034	-0.1069	-9.80526	1.33005e-12	4.83986e-07	0.131473	0.0273559	LIHC
cg06650546	-0.264771	-18.3134	4.14624e-22	1.50876e-16	0.334522	0.0673721	LIHC
cg06672093	0.166701	9.08392	1.2769e-11	4.64646e-06	0.530301	0.68992	LIHC
cg06673178	-0.233881	-6.91491	1.58535e-08	0.00576887	0.51598	0.263231	LIHC
cg06700462	-0.26769	-39.2668	1.08061e-35	3.93218e-30	0.340877	0.0744542	LIHC
cg06705078	-0.280422	-25.7004	5.42791e-28	1.97514e-22	0.304588	0.0200941	LIHC
cg06720669	-0.236707	-10.2934	2.98471e-13	1.08609e-07	0.493603	0.275643	LIHC
cg06721573	-0.334271	-23.7373	1.38843e-26	5.05229e-21	0.367346	0.0218073	LIHC
cg06774787	-0.196012	-13.633	2.46125e-17	8.95614e-12	0.373966	0.183573	LIHC
cg06775759	-0.150478	-8.6688	4.8241e-11	1.75542e-05	0.448111	0.317449	LIHC
cg06779458	-0.30145	-15.0091	7.61934e-19	2.77257e-13	0.503794	0.196228	LIHC
cg06779802	-0.491681	-33.0672	1.53874e-32	5.59927e-27	0.577449	0.0976279	LIHC
cg06783548	-0.357965	-37.628	6.5939e-35	2.39943e-29	0.381329	0.018835	LIHC
cg06791102	-0.25691	-13.3155	5.66422e-17	2.06113e-11	0.360517	0.115543	LIHC
cg06796204	-0.332859	-41.0769	1.5899e-36	5.78544e-31	0.389843	0.0518887	LIHC
cg06803079	-0.173722	-27.9158	1.7996e-29	6.54848e-24	0.283443	0.110128	LIHC
cg06805513	-0.272435	-19.8223	1.8814e-23	6.84615e-18	0.316762	0.0348118	LIHC
cg06807018	-0.338202	-26.8086	9.57156e-29	3.48296e-23	0.44842	0.109638	LIHC
cg06834235	-0.407047	-53.197	2.48152e-41	9.02991e-36	0.433254	0.0194915	LIHC
cg06899582	-0.227227	-28.0518	1.4715e-29	5.35458e-24	0.263093	0.0321713	LIHC
cg06915321	-0.415926	-23.5498	1.91521e-26	6.96919e-21	0.547136	0.144137	LIHC
cg06915915	-0.464191	-18.7336	1.71816e-22	6.25216e-17	0.561544	0.116692	LIHC
cg06922569	-0.144215	-11.2495	1.74714e-14	6.35758e-09	0.17723	0.028236	LIHC
cg06943593	-0.215048	-22.8104	6.95802e-26	2.53193e-20	0.28541	0.0796768	LIHC
cg06945800	-0.415335	-46.0417	1.21933e-38	4.43696e-33	0.446678	0.0239072	LIHC
cg06964654	-0.253684	-12.156	1.32157e-15	4.809e-10	0.318866	0.076308	LIHC
cg07038409	-0.338188	-44.6837	4.38658e-38	1.59622e-32	0.421534	0.0784078	LIHC
cg07051162	-0.140851	-10.2346	3.56861e-13	1.29857e-07	0.166828	0.0327047	LIHC
cg07056506	-0.398637	-24.0045	8.81261e-27	3.20679e-21	0.444958	0.043091	LIHC
cg07086565	-0.255391	-19.4641	3.85297e-23	1.40204e-17	0.294201	0.0264772	LIHC
cg07089242	-0.290499	-24.0338	8.38607e-27	3.05157e-21	0.335819	0.037844	LIHC
cg07096248	-0.0545992	-7.59072	1.65216e-09	0.000601197	0.106888	0.0563492	LIHC
cg07109010	-0.241021	-23.5952	1.77122e-26	6.44522e-21	0.275015	0.0278824	LIHC
cg07136872	-0.261458	-17.1211	5.51149e-21	2.00555e-15	0.296225	0.0250125	LIHC
cg07187289	-0.399331	-29.7471	1.28678e-30	4.6824e-25	0.418322	0.0240207	LIHC
cg07200487	-0.221975	-15.7822	1.18781e-19	4.32229e-14	0.254017	0.0272777	LIHC
cg07215528	-0.315475	-24.701	2.74945e-27	1.00049e-21	0.351402	0.0357717	LIHC
cg07261646	-0.41943	-43.1616	1.92721e-37	7.01285e-32	0.452663	0.0250151	LIHC
cg07312966	-0.211216	-19.4009	4.3771e-23	1.59277e-17	0.235432	0.0271331	LIHC
cg07363416	-0.299196	-31.8484	7.43581e-32	2.70579e-26	0.420596	0.116311	LIHC
cg07381502	-0.22091	-13.7628	1.75679e-17	6.39273e-12	0.240037	0.034424	LIHC
cg07386410	-0.27707	-33.799	6.12979e-33	2.23055e-27	0.307762	0.0245813	LIHC
cg07393670	-0.390105	-33.3978	1.0129e-32	3.68581e-27	0.446637	0.0470044	LIHC
cg07395435	-0.266949	-21.6841	5.3242e-25	1.9374e-19	0.34979	0.0846699	LIHC
cg07405239	0.0746455	6.86994	1.84435e-08	0.00671134	0.852717	0.904785	LIHC
cg07413956	0.104573	6.29201	1.2952e-07	0.0471305	0.849679	0.941417	LIHC
cg07416427	0.0586397	6.97435	1.29816e-08	0.00472383	0.854336	0.906234	LIHC
cg07419801	-0.412459	-46.6957	6.66732e-39	2.42614e-33	0.440971	0.0198798	LIHC
cg07439872	-0.214617	-13.4966	3.51545e-17	1.27922e-11	0.274804	0.0694591	LIHC
cg07446674	-0.440132	-21.7013	5.15779e-25	1.87685e-19	0.539518	0.0783153	LIHC
cg07464524	-0.21808	-17.1882	4.74765e-21	1.7276e-15	0.276423	0.0471861	LIHC
cg07464598	-0.275765	-31.9306	6.67505e-32	2.42896e-26	0.309469	0.0273232	LIHC
cg07516457	-0.292328	-34.6521	2.14544e-33	7.80696e-28	0.31662	0.0192308	LIHC
cg07519908	-0.167164	-9.63092	2.28441e-12	8.31266e-07	0.212165	0.0482	LIHC
cg07553115	-0.335501	-17.0296	6.76022e-21	2.45995e-15	0.436068	0.100099	LIHC
cg07647518	-0.230582	-20.322	7.04098e-24	2.56212e-18	0.329457	0.09455	LIHC
cg07648454	-0.434779	-36.9858	1.36706e-34	4.97455e-29	0.474491	0.0370387	LIHC
cg07659240	-0.316404	-31.6333	9.8769e-32	3.59406e-26	0.349842	0.0238761	LIHC
cg07674075	-0.420699	-34.0628	4.41899e-33	1.60801e-27	0.482644	0.0521632	LIHC
cg07674503	-0.444763	-42.6675	3.14954e-37	1.14607e-31	0.470745	0.0180392	LIHC
cg07681512	-0.249539	-11.1828	2.12202e-14	7.72175e-09	0.322878	0.0680908	LIHC
cg07682072	-0.290267	-31.961	6.41452e-32	2.33416e-26	0.365903	0.0801731	LIHC
cg07686944	-0.179645	-12.8237	2.11109e-16	7.68197e-11	0.205569	0.0309333	LIHC
cg07693301	-0.22383	-28.2502	1.09895e-29	3.99892e-24	0.261708	0.0309071	LIHC
cg07758529	-0.267976	-9.08876	1.2574e-11	4.57551e-06	0.532113	0.28839	LIHC
cg07771637	-0.162775	-17.6694	1.6498e-21	6.00341e-16	0.187276	0.0232445	LIHC
cg07779434	-0.237177	-27.3299	4.32489e-29	1.57377e-23	0.279656	0.0367574	LIHC
cg07781082	-0.323284	-24.3382	5.02529e-27	1.82863e-21	0.352087	0.022505	LIHC
cg07806343	-0.397462	-50.1089	3.23993e-40	1.17896e-34	0.447002	0.0409786	LIHC
cg07822777	-0.359261	-27.6061	2.85474e-29	1.0388e-23	0.398887	0.0516752	LIHC
cg07823797	-0.257408	-28.9834	3.79607e-30	1.38134e-24	0.277883	0.0170908	LIHC
cg07825508	-0.246544	-17.6152	1.85607e-21	6.75399e-16	0.295768	0.0440442	LIHC
cg07828380	-0.281722	-20.3686	6.43047e-24	2.33996e-18	0.349732	0.0751777	LIHC
cg07834773	-0.271366	-24.4497	4.17171e-27	1.51803e-21	0.355639	0.0834845	LIHC
cg07837161	-0.444495	-45.0911	2.97623e-38	1.08301e-32	0.491029	0.0446783	LIHC
cg07858069	-0.151788	-13.5857	2.78449e-17	1.01324e-11	0.19195	0.0417171	LIHC
cg07861180	-0.485307	-39.5644	7.84086e-36	2.85318e-30	0.555601	0.064387	LIHC
cg07865580	-0.306675	-20.5409	4.60639e-24	1.6762e-18	0.348965	0.0388025	LIHC
cg07867687	-0.3252	-51.4627	1.03132e-40	3.75283e-35	0.346753	0.0157118	LIHC
cg07868857	-0.12642	-11.4964	8.56024e-15	3.11495e-09	0.164632	0.0316392	LIHC
cg07874334	-0.351816	-33.2136	1.27796e-32	4.65031e-27	0.37938	0.0223829	LIHC
cg07887243	-0.191548	-13.5004	3.48059e-17	1.26654e-11	0.240103	0.050318	LIHC
cg07896193	-0.25436	-36.8029	1.68623e-34	6.13597e-29	0.306223	0.048962	LIHC
cg07902213	-0.143397	-14.5584	2.32176e-18	8.44855e-13	0.177354	0.0323544	LIHC
cg07910525	-0.299332	-25.9822	3.4702e-28	1.26276e-22	0.340063	0.033823	LIHC
cg07912337	-0.46191	-25.3583	9.3986e-28	3.42002e-22	0.495173	0.0402872	LIHC
cg07929406	-0.259205	-12.6695	3.20819e-16	1.16741e-10	0.385129	0.11547	LIHC
cg07930217	-0.221033	-30.1546	7.29965e-31	2.65624e-25	0.242393	0.0232005	LIHC
cg07951153	-0.389429	-28.4544	8.15352e-30	2.96695e-24	0.422512	0.0354342	LIHC
cg07954607	-0.417142	-25.206	1.20272e-27	4.37652e-22	0.489477	0.0531045	LIHC
cg07973464	-0.312967	-27.0477	6.63812e-29	2.41552e-23	0.365828	0.0459082	LIHC
cg07989867	-0.132682	-11.6779	5.0905e-15	1.85236e-09	0.187213	0.0524212	LIHC
cg07990395	-0.385076	-17.431	2.77748e-21	1.01069e-15	0.443201	0.0620285	LIHC
cg07994386	-0.15352	-13.4662	3.80783e-17	1.38562e-11	0.191267	0.0392808	LIHC
cg08063601	-0.231042	-18.4764	2.94062e-22	1.07005e-16	0.291693	0.0611621	LIHC
cg08108619	-0.359426	-20.8821	2.39447e-24	8.71313e-19	0.414068	0.0500821	LIHC
cg08199506	-0.344846	-39.941	5.24196e-36	1.90748e-30	0.400767	0.049902	LIHC
cg08202860	-0.411581	-38.1253	3.77926e-35	1.37522e-29	0.462916	0.055156	LIHC
cg08209483	-0.199431	-22.6076	9.97342e-26	3.62919e-20	0.241607	0.0368642	LIHC
cg08282540	-0.20314	-19.1966	6.62583e-23	2.41105e-17	0.264109	0.0578626	LIHC
cg08282969	-0.443264	-43.6012	1.25056e-37	4.55061e-32	0.552906	0.105331	LIHC
cg08298085	-0.416325	-34.9383	1.51654e-33	5.51847e-28	0.485678	0.0654608	LIHC
cg08358587	-0.307645	-33.4285	9.74531e-33	3.54618e-27	0.334123	0.0245871	LIHC
cg08384999	0.273005	10.7087	8.57444e-14	3.12012e-08	0.439092	0.696163	LIHC
cg08405463	-0.444766	-36.215	3.33195e-34	1.21245e-28	0.507742	0.0598808	LIHC
cg08408091	-0.362528	-19.0235	9.44141e-23	3.4356e-17	0.397375	0.0435624	LIHC
cg08422514	-0.16218	-19.423	4.18625e-23	1.52332e-17	0.213177	0.0494296	LIHC
cg08437461	-0.289604	-19.1323	7.55624e-23	2.74961e-17	0.356816	0.0566163	LIHC
cg08437835	-0.306111	-26.1838	2.52589e-28	9.19137e-23	0.344539	0.0381744	LIHC
cg08446187	-0.359717	-27.2852	4.6276e-29	1.68392e-23	0.398893	0.0306303	LIHC
cg08447449	-0.21538	-19.1628	7.09964e-23	2.58346e-17	0.241583	0.0199724	LIHC
cg08470157	-0.169381	-12.1936	1.19007e-15	4.33048e-10	0.196805	0.035757	LIHC
cg08476890	-0.139461	-10.3893	2.2335e-13	8.1274e-08	0.224354	0.0872435	LIHC
cg08479532	-0.424601	-27.2468	4.90412e-29	1.78454e-23	0.491352	0.0633693	LIHC
cg08479711	-0.210879	-19.1478	7.31974e-23	2.66355e-17	0.345821	0.150606	LIHC
cg08491314	-0.123252	-13.66	2.29427e-17	8.34852e-12	0.169292	0.0391984	LIHC
cg08605656	-0.126755	-8.00016	4.26351e-10	0.000155143	0.336545	0.229208	LIHC
cg08617833	-0.326264	-21.3972	9.06737e-25	3.29949e-19	0.485969	0.161769	LIHC
cg08622041	0.0531414	7.40717	3.04506e-09	0.00110805	0.82728	0.866267	LIHC
cg08623691	-0.250823	-36.1334	3.66517e-34	1.3337e-28	0.311961	0.0615482	LIHC
cg08626646	-0.287086	-24.1953	6.38625e-27	2.32387e-21	0.35148	0.0562819	LIHC
cg08627233	-0.298878	-29.2329	2.65853e-30	9.67402e-25	0.330493	0.0206553	LIHC
cg08637771	-0.386071	-34.4233	2.83629e-33	1.03209e-27	0.453983	0.0595038	LIHC
cg08637905	-0.232212	-21.0311	1.80463e-24	6.5668e-19	0.335979	0.107424	LIHC
cg08648877	-0.373707	-38.1062	3.86054e-35	1.4048e-29	0.405825	0.0216194	LIHC
cg08703114	-0.368826	-37.5105	7.52819e-35	2.7394e-29	0.426671	0.0596456	LIHC
cg08704539	-0.189779	-10.2134	3.8052e-13	1.38466e-07	0.51528	0.335616	LIHC
cg08783090	-0.263738	-18.9601	1.0757e-22	3.91433e-17	0.360576	0.096477	LIHC
cg08784874	-0.352941	-33.0073	1.66034e-32	6.04174e-27	0.380023	0.0198585	LIHC
cg08790343	-0.0941418	-7.36296	3.5294e-09	0.0012843	0.13798	0.0430147	LIHC
cg08812897	-0.180576	-8.82734	2.89718e-11	1.05424e-05	0.535813	0.342735	LIHC
cg08817443	-0.250766	-16.9509	8.0619e-21	2.93361e-15	0.411943	0.16873	LIHC
cg08848711	-0.191489	-7.86258	6.71083e-10	0.000244198	0.633583	0.408076	LIHC
cg08881528	-0.186615	-15.3849	3.06247e-19	1.11439e-13	0.234125	0.0436008	LIHC
cg08905118	-0.171301	-20.5173	4.82111e-24	1.75434e-18	0.19167	0.017046	LIHC
cg08950703	-0.406395	-31.8732	7.19784e-32	2.61919e-26	0.440528	0.0303403	LIHC
cg08952424	-0.411499	-41.3613	1.18511e-36	4.31244e-31	0.456556	0.0425477	LIHC
cg08955276	-0.33286	-12.7105	2.86911e-16	1.04403e-10	0.394255	0.0736833	LIHC
cg08964402	-0.349775	-18.0184	7.76831e-22	2.82678e-16	0.394678	0.0465919	LIHC
cg08966380	-0.396915	-23.9608	9.48864e-27	3.45278e-21	0.455968	0.0569109	LIHC
cg08969352	-0.415604	-38.9077	1.59618e-35	5.80826e-30	0.479239	0.0605033	LIHC
cg08980509	-0.385274	-56.3844	2.02795e-42	7.37944e-37	0.432086	0.0459058	LIHC
cg08998989	-0.155691	-11.9113	2.62577e-15	9.55479e-10	0.203945	0.0432406	LIHC
cg09018810	-0.30899	-24.9281	1.89206e-27	6.88494e-22	0.34144	0.0253828	LIHC
cg09024810	-0.200806	-11.4891	8.74003e-15	3.18038e-09	0.301776	0.0934339	LIHC
cg09034929	-0.153812	-13.9288	1.14452e-17	4.16474e-12	0.1943	0.0437325	LIHC
cg09038535	-0.117258	-13.54	3.13778e-17	1.14179e-11	0.151343	0.0338889	LIHC
cg09056691	-0.335796	-28.7949	4.97727e-30	1.81116e-24	0.360188	0.0205446	LIHC
cg09060772	-0.37029	-27.7711	2.2311e-29	8.11866e-24	0.411964	0.0369097	LIHC
cg09061583	-0.170458	-13.4005	4.52598e-17	1.64694e-11	0.201852	0.0291547	LIHC
cg09068301	-0.406645	-18.5913	2.31164e-22	8.41172e-17	0.533888	0.125443	LIHC
cg09070199	-0.228221	-17.1481	5.18995e-21	1.88855e-15	0.266381	0.0385618	LIHC
cg09072865	-0.424967	-44.2749	6.49658e-38	2.36402e-32	0.476043	0.0474679	LIHC
cg09080960	-0.304467	-16.3038	3.51422e-20	1.27878e-14	0.436891	0.143138	LIHC
cg09091181	-0.3971	-34.1861	3.79514e-33	1.381e-27	0.425425	0.0251431	LIHC
cg09112156	-0.32565	-28.519	7.42127e-30	2.7005e-24	0.400008	0.068846	LIHC
cg09121987	-0.374596	-27.1803	5.42473e-29	1.97398e-23	0.431715	0.0630516	LIHC
cg09158774	-0.309775	-24.2544	5.78282e-27	2.10429e-21	0.364586	0.0552784	LIHC
cg09185350	-0.194776	-26.4965	1.55041e-28	5.64174e-23	0.223765	0.0276861	LIHC
cg09192059	-0.203299	-12.9419	1.53429e-16	5.58308e-11	0.266461	0.0526911	LIHC
cg09196081	-0.181083	-12.7674	2.45893e-16	8.94769e-11	0.286053	0.0975447	LIHC
cg09207137	-0.369866	-36.1952	3.40973e-34	1.24075e-28	0.41537	0.0405091	LIHC
cg09210933	-0.24987	-21.7623	4.60952e-25	1.67734e-19	0.31588	0.0635917	LIHC
cg09307104	-0.440543	-39.4184	9.1742e-36	3.33836e-30	0.510621	0.0640083	LIHC
cg09309899	-0.332109	-37.902	4.84809e-35	1.76415e-29	0.358304	0.0211845	LIHC
cg09310980	-0.400804	-19.1868	6.75968e-23	2.45975e-17	0.573304	0.159161	LIHC
cg09329826	-0.225979	-11.2196	1.906e-14	6.93568e-09	0.329864	0.111696	LIHC
cg09342610	-0.33596	-18.7478	1.66854e-22	6.07157e-17	0.386922	0.0311159	LIHC
cg09357232	-0.0599803	-7.45725	2.57662e-09	0.000937595	0.10411	0.0368891	LIHC
cg09368074	-0.256516	-14.7329	1.50397e-18	5.47272e-13	0.297757	0.0452115	LIHC
cg09406238	-0.294788	-20.5423	4.5936e-24	1.67155e-18	0.512797	0.194192	LIHC
cg09411587	-0.348356	-33.9841	4.87106e-33	1.77251e-27	0.439916	0.0874532	LIHC
cg09418475	-0.443241	-41.302	1.25982e-36	4.58431e-31	0.479794	0.0348256	LIHC
cg09434493	-0.391083	-27.1965	5.29315e-29	1.9261e-23	0.601953	0.212232	LIHC
cg09513996	-0.0985874	-8.18479	2.32572e-10	8.46296e-05	0.814123	0.700646	LIHC
cg09514431	-0.471058	-48.51	1.30225e-39	4.73869e-34	0.511257	0.0340118	LIHC
cg09521623	0.110673	8.87348	2.49886e-11	9.093e-06	0.32016	0.445728	LIHC
cg09523186	-0.401755	-37.8344	5.22917e-35	1.90282e-29	0.459009	0.0478197	LIHC
cg09525227	-0.278709	-20.3276	6.96465e-24	2.53434e-18	0.390968	0.111612	LIHC
cg09559792	-0.0371242	-10.0409	6.44144e-13	2.34395e-07	0.0595719	0.022609	LIHC
cg09597400	-0.31056	-26.5281	1.47621e-28	5.3717e-23	0.37491	0.058446	LIHC
cg09610589	-0.202211	-29.3526	2.24296e-30	8.16182e-25	0.227843	0.0211048	LIHC
cg09619693	-0.155783	-21.744	4.76724e-25	1.73473e-19	0.201607	0.0412597	LIHC
cg09656426	-0.203824	-19.7169	2.32043e-23	8.44371e-18	0.263626	0.0533852	LIHC
cg09666011	-0.271675	-33.8458	5.78309e-33	2.10439e-27	0.303393	0.0246151	LIHC
cg09679059	-0.0492903	-6.96176	1.35426e-08	0.00492795	0.0732207	0.0284467	LIHC
cg09720515	-0.36414	-47.1856	4.26444e-39	1.55177e-33	0.397805	0.0286989	LIHC
cg09738386	-0.341165	-27.7661	2.24801e-29	8.1802e-24	0.387887	0.0396649	LIHC
cg09743287	-0.137972	-7.99857	4.28598e-10	0.000155961	0.165752	0.0274318	LIHC
cg09786233	-0.229445	-18.997	9.97013e-23	3.62799e-17	0.258283	0.0317917	LIHC
cg09790289	-0.360305	-34.8926	1.60278e-33	5.83228e-28	0.388666	0.021079	LIHC
cg09793609	-0.262918	-11.0075	3.54401e-14	1.28961e-08	0.4062	0.149529	LIHC
cg09796544	-0.15924	-8.86129	2.59836e-11	9.45508e-06	0.427319	0.288158	LIHC
cg09799350	-0.292581	-26.199	2.46641e-28	8.97494e-23	0.325954	0.0253263	LIHC
cg09813276	-0.375456	-25.4876	7.63184e-28	2.77712e-22	0.441554	0.0582066	LIHC
cg09821007	-0.136214	-9.1714	9.67391e-12	3.5202e-06	0.555893	0.432766	LIHC
cg09834142	-0.334924	-26.7141	1.10704e-28	4.02835e-23	0.366657	0.0260461	LIHC
cg09850561	-0.35169	-34.994	1.41813e-33	5.16036e-28	0.399809	0.0349526	LIHC
cg09863225	-0.164699	-19.1683	7.01973e-23	2.55438e-17	0.275674	0.105639	LIHC
cg09868337	-0.320005	-23.3488	2.71039e-26	9.86272e-21	0.362668	0.0366133	LIHC
cg09895223	-0.107958	-12.0304	1.87806e-15	6.83398e-10	0.145926	0.0346768	LIHC
cg09953988	0.114281	10.2302	3.61609e-13	1.31585e-07	0.781571	0.889652	LIHC
cg09965404	-0.387157	-27.6052	2.85847e-29	1.04016e-23	0.427279	0.0271903	LIHC
cg09985072	-0.359066	-30.8392	2.8601e-31	1.04075e-25	0.488493	0.126021	LIHC
cg09990556	-0.191609	-21.0673	1.68522e-24	6.13228e-19	0.224085	0.0288782	LIHC
cg09990582	-0.202338	-16.5537	1.98025e-20	7.20586e-15	0.236474	0.0342288	LIHC
cg09996779	-0.304387	-20.6243	3.92187e-24	1.42711e-18	0.364885	0.0509359	LIHC
cg09998474	-0.166412	-15.5883	1.8817e-19	6.84725e-14	0.205598	0.0289644	LIHC
cg10052922	-0.161141	-6.47477	6.98875e-08	0.0254311	0.206489	0.047427	LIHC
cg10055097	-0.429238	-29.9779	9.32562e-31	3.39346e-25	0.479843	0.0419148	LIHC
cg10070668	-0.293436	-19.7839	2.03059e-23	7.38902e-18	0.323687	0.0270483	LIHC
cg10078687	-0.246818	-19.5347	3.34276e-23	1.21638e-17	0.359668	0.0987096	LIHC
cg10088372	-0.352119	-37.0383	1.28734e-34	4.68443e-29	0.382353	0.01864	LIHC
cg10191387	-0.29532	-23.8572	1.13156e-26	4.11761e-21	0.35003	0.053411	LIHC
cg10201390	-0.385447	-55.8722	3.00443e-42	1.09327e-36	0.412768	0.0236447	LIHC
cg10207070	-0.180584	-21.0035	1.90137e-24	6.9188e-19	0.224463	0.0397153	LIHC
cg10274815	-0.380625	-41.1464	1.47948e-36	5.38363e-31	0.479912	0.0954038	LIHC
cg10286673	-0.338996	-33.4201	9.84911e-33	3.58395e-27	0.375263	0.0279705	LIHC
cg10288278	-0.303583	-18.1414	5.97316e-22	2.17355e-16	0.426939	0.12812	LIHC
cg10291990	-0.270422	-21.9876	3.05034e-25	1.10998e-19	0.30757	0.0417658	LIHC
cg10305945	-0.3154	-34.2063	3.70185e-33	1.34705e-27	0.355275	0.0366249	LIHC
cg10315562	-0.392182	-60.4602	1.00084e-43	3.64191e-38	0.420345	0.0233865	LIHC
cg10347293	-0.30292	-25.2873	1.05421e-27	3.83613e-22	0.334886	0.0278402	LIHC
cg10347326	-0.371783	-21.5471	6.86008e-25	2.49629e-19	0.446372	0.0830274	LIHC
cg10421300	-0.320239	-19.9355	1.50309e-23	5.46954e-18	0.376992	0.0657747	LIHC
cg10451760	-0.291085	-21.3545	9.82106e-25	3.57375e-19	0.5107	0.223533	LIHC
cg10460864	-0.0645432	-8.28616	1.66967e-10	6.07571e-05	0.0904111	0.0295297	LIHC
cg10473383	-0.178171	-9.52777	3.15148e-12	1.14678e-06	0.335735	0.149941	LIHC
cg10482495	-0.38241	-28.8756	4.43157e-30	1.61259e-24	0.488172	0.113614	LIHC
cg10500026	-0.192462	-10.8717	5.28741e-14	1.92402e-08	0.225826	0.0372808	LIHC
cg10510586	-0.292313	-18.0638	7.04975e-22	2.56531e-16	0.420792	0.134338	LIHC
cg10575236	-0.178687	-20.9945	1.93396e-24	7.03743e-19	0.202973	0.0210025	LIHC
cg10645578	-0.358559	-46.0663	1.19178e-38	4.33671e-33	0.391838	0.0327023	LIHC
cg10655551	-0.214481	-15.1282	5.69855e-19	2.07362e-13	0.250304	0.034188	LIHC
cg10674704	-0.307832	-23.8814	1.08589e-26	3.95141e-21	0.394071	0.0842939	LIHC
cg10701490	-0.31589	-21.275	1.13968e-24	4.14715e-19	0.442808	0.120621	LIHC
cg10706039	-0.249308	-12.3685	7.3268e-16	2.66612e-10	0.33191	0.0810708	LIHC
cg10717149	-0.45794	-30.9938	2.3207e-31	8.44472e-26	0.501937	0.0435022	LIHC
cg10718795	-0.212336	-11.0446	3.17879e-14	1.15672e-08	0.298704	0.0755068	LIHC
cg10721440	-0.38067	-44.9988	3.2486e-38	1.18212e-32	0.404245	0.0223769	LIHC
cg10848980	-0.281363	-16.8355	1.04506e-20	3.80282e-15	0.328634	0.0411381	LIHC
cg10856819	0.184573	10.4945	1.62739e-13	5.92185e-08	0.439701	0.589249	LIHC
cg10860619	-0.466412	-54.6282	7.91967e-42	2.88186e-36	0.495755	0.0225057	LIHC
cg10861555	-0.34644	-24.8852	2.02993e-27	7.38662e-22	0.536543	0.191921	LIHC
cg10869159	-0.237127	-19.4422	4.02651e-23	1.46519e-17	0.279221	0.0478727	LIHC
cg10869581	-0.368904	-26.957	7.62358e-29	2.77411e-23	0.487344	0.124093	LIHC
cg10874556	-0.274312	-14.546	2.39451e-18	8.7133e-13	0.459594	0.194217	LIHC
cg10912974	-0.391242	-36.0553	4.01629e-34	1.46147e-28	0.420185	0.0257679	LIHC
cg10914789	-0.351495	-32.0862	5.44468e-32	1.98124e-26	0.462657	0.118097	LIHC
cg10950413	-0.296071	-39.1149	1.27393e-35	4.63565e-30	0.331494	0.0259338	LIHC
cg10956264	-0.29182	-25.729	5.18579e-28	1.88704e-22	0.338929	0.0411866	LIHC
cg10978884	-0.277678	-23.4325	2.34473e-26	8.53215e-21	0.305742	0.0261539	LIHC
cg10983111	-0.344504	-35.8467	5.13229e-34	1.86757e-28	0.368595	0.0162231	LIHC
cg10987536	-0.438107	-60.2365	1.1744e-43	4.27349e-38	0.512281	0.0710152	LIHC
cg10991108	-0.483434	-48.6138	1.18827e-39	4.32393e-34	0.546576	0.0612995	LIHC
cg10991514	-0.413525	-18.7454	1.67676e-22	6.1015e-17	0.495304	0.0804153	LIHC
cg11005845	-0.187729	-12.6789	3.12742e-16	1.13802e-10	0.220728	0.0398712	LIHC
cg11021247	-0.161044	-14.5839	2.17866e-18	7.92783e-13	0.203339	0.0446916	LIHC
cg11049154	-0.212807	-12.8399	2.02045e-16	7.35215e-11	0.278611	0.0634596	LIHC
cg11049634	0.389071	16.0539	6.2761e-20	2.28378e-14	0.488835	0.874094	LIHC
cg11081925	-0.212741	-15.925	8.48742e-20	3.08845e-14	0.347499	0.141691	LIHC
cg11082424	-0.393902	-42.0581	5.81608e-37	2.11639e-31	0.442587	0.0373087	LIHC
cg11111131	-0.340544	-24.8485	2.15612e-27	7.84583e-22	0.366974	0.0215311	LIHC
cg11111271	-0.367336	-36.9254	1.46488e-34	5.3305e-29	0.414568	0.0478245	LIHC
cg11116781	-0.0997824	-10.6076	1.15937e-13	4.21878e-08	0.201477	0.107903	LIHC
cg11143827	0.380382	49.3013	6.50614e-40	2.36749e-34	0.579193	0.958832	LIHC
cg11152253	-0.493549	-47.9405	2.16043e-39	7.86151e-34	0.535481	0.0403555	LIHC
cg11154719	-0.378	-34.7394	1.92937e-33	7.02069e-28	0.405402	0.0190007	LIHC
cg11184697	-0.429733	-37.1777	1.09801e-34	3.99552e-29	0.451679	0.0199937	LIHC
cg11184796	-0.180826	-11.4241	1.05402e-14	3.83544e-09	0.235474	0.0487247	LIHC
cg11185978	-0.441497	-40.7641	2.2011e-36	8.00951e-31	0.470877	0.0309387	LIHC
cg11186637	-0.278365	-22.8923	6.0213e-26	2.19107e-20	0.310071	0.0265041	LIHC
cg11186981	-0.375705	-45.5342	1.95901e-38	7.12857e-33	0.412196	0.0295301	LIHC
cg11190082	-0.308913	-33.0904	1.49396e-32	5.4363e-27	0.335249	0.0252096	LIHC
cg11193681	-0.168641	-12.9978	1.32026e-16	4.80426e-11	0.337142	0.158412	LIHC
cg11194545	-0.374431	-21.8233	4.12052e-25	1.4994e-19	0.562891	0.217568	LIHC
cg11233153	-0.420995	-33.0078	1.65946e-32	6.03856e-27	0.448311	0.0222447	LIHC
cg11267664	0.0771988	7.76966	9.12492e-10	0.000332043	0.892092	0.965944	LIHC
cg11271681	-0.324425	-24.8146	2.27989e-27	8.2962e-22	0.37039	0.0449207	LIHC
cg11281291	-0.331515	-20.019	1.27478e-23	4.63876e-18	0.374582	0.0331193	LIHC
cg11281673	-0.133399	-22.9735	5.21837e-26	1.89889e-20	0.162795	0.0298137	LIHC
cg11286196	-0.307137	-33.4794	9.14106e-33	3.3263e-27	0.344649	0.0314023	LIHC
cg11308037	-0.411764	-48.3712	1.47249e-39	5.35818e-34	0.453006	0.032544	LIHC
cg11329209	-0.324857	-33.8539	5.72495e-33	2.08323e-27	0.353372	0.0252948	LIHC
cg11337025	-0.317535	-25.0213	1.62468e-27	5.91197e-22	0.409185	0.0843356	LIHC
cg11344644	-0.27723	-23.0122	4.87595e-26	1.77429e-20	0.305547	0.027227	LIHC
cg11395955	-0.0404573	-6.85047	1.96921e-08	0.00716568	0.0540671	0.0193076	LIHC
cg11409998	-0.309715	-16.3287	3.31829e-20	1.20748e-14	0.390522	0.0724797	LIHC
cg11449070	-0.11414	-6.44108	7.83048e-08	0.028494	0.14047	0.017587	LIHC
cg11458217	-0.360696	-19.921	1.54697e-23	5.62919e-18	0.497558	0.130041	LIHC
cg11506821	-0.272335	-23.8976	1.05639e-26	3.84405e-21	0.316526	0.0350852	LIHC
cg11509903	-0.276366	-21.695	5.21859e-25	1.89897e-19	0.316497	0.0376501	LIHC
cg11520843	-0.330392	-32.0786	5.49883e-32	2.00095e-26	0.35556	0.0174288	LIHC
cg11616438	-0.141655	-14.4715	2.88578e-18	1.0501e-12	0.16889	0.026706	LIHC
cg11629919	0.104666	11.9506	2.3508e-15	8.55422e-10	0.860912	0.955279	LIHC
cg11633007	0.19271	11.3436	1.32986e-14	4.83917e-09	0.680431	0.870938	LIHC
cg11637006	-0.397191	-15.2776	3.9665e-19	1.44336e-13	0.434304	0.0318177	LIHC
cg11653314	-0.386687	-28.4116	8.67912e-30	3.15821e-24	0.499227	0.11482	LIHC
cg11653864	-0.352608	-31.1494	1.88238e-31	6.84972e-26	0.387813	0.0300186	LIHC
cg11654517	-0.272181	-15.0165	7.48349e-19	2.72314e-13	0.447172	0.187904	LIHC
cg11663393	-0.314085	-20.7067	3.34788e-24	1.21825e-18	0.347557	0.0249211	LIHC
cg11673471	-0.537335	-35.9788	4.39336e-34	1.59868e-28	0.586854	0.0497855	LIHC
cg11704309	-0.239507	-21.7929	4.3575e-25	1.58563e-19	0.268779	0.0217095	LIHC
cg11704979	-0.294743	-34.2827	3.36988e-33	1.22625e-27	0.333466	0.0339192	LIHC
cg11712793	-0.170291	-9.58261	2.65552e-12	9.66305e-07	0.355118	0.198452	LIHC
cg11721100	-0.229943	-17.9249	9.49526e-22	3.45519e-16	0.289588	0.0677274	LIHC
cg11778030	-0.194772	-19.4447	4.0067e-23	1.45798e-17	0.232827	0.0297026	LIHC
cg11825731	-0.183837	-13.582	2.8111e-17	1.02292e-11	0.222336	0.0275888	LIHC
cg11839979	-0.23767	-29.9925	9.13796e-31	3.32517e-25	0.278268	0.0392271	LIHC
cg11851349	-0.394964	-29.0007	3.70292e-30	1.34744e-24	0.441197	0.0387236	LIHC
cg11858468	-0.451476	-33.1606	1.36663e-32	4.97297e-27	0.504817	0.0438407	LIHC
cg11859529	-0.321056	-25.0632	1.51717e-27	5.52078e-22	0.377126	0.0407117	LIHC
cg11863519	-0.11717	-15.8895	9.22521e-20	3.35693e-14	0.142978	0.0252316	LIHC
cg11865900	-0.232484	-12.3306	8.13687e-16	2.96089e-10	0.713112	0.509601	LIHC
cg11875624	-0.324278	-15.0357	7.14021e-19	2.59822e-13	0.377903	0.0616128	LIHC
cg11902811	-0.379085	-32.3322	3.95296e-32	1.43843e-26	0.417083	0.0325156	LIHC
cg11923788	-0.290946	-16.3512	3.15021e-20	1.14632e-14	0.383621	0.0755928	LIHC
cg12026625	-0.338215	-25.3298	9.84112e-28	3.58105e-22	0.380295	0.0271332	LIHC
cg12039967	-0.30073	-30.5508	4.2345e-31	1.54087e-25	0.370366	0.0613151	LIHC
cg12044418	-0.0621069	-11.0189	3.42746e-14	1.2472e-08	0.095346	0.0322825	LIHC
cg12058262	-0.316965	-20.5347	4.6618e-24	1.69636e-18	0.351089	0.0356196	LIHC
cg12058840	-0.335139	-29.5896	1.60501e-30	5.84042e-25	0.398421	0.056172	LIHC
cg12064531	-0.372871	-52.3203	5.06974e-41	1.84481e-35	0.404244	0.0338447	LIHC
cg12075609	-0.463624	-24.5729	3.39849e-27	1.23666e-21	0.56917	0.102369	LIHC
cg12111783	0.275585	22.4375	1.35187e-25	4.91926e-20	0.529075	0.790774	LIHC
cg12128683	-0.195219	-9.03763	1.47949e-11	5.38365e-06	0.224698	0.0323035	LIHC
cg12130015	-0.171462	-13.5026	3.461e-17	1.25941e-11	0.215206	0.0378557	LIHC
cg12137402	-0.347683	-36.2487	3.20345e-34	1.16569e-28	0.381491	0.0286701	LIHC
cg12145026	-0.306001	-32.4075	3.58558e-32	1.30474e-26	0.345963	0.033538	LIHC
cg12152167	-0.164447	-6.77376	2.54972e-08	0.00927809	0.215903	0.0620678	LIHC
cg12165338	-0.343045	-34.9714	1.45721e-33	5.3026e-28	0.373465	0.0283205	LIHC
cg12165354	-0.17368	-20.3066	7.25528e-24	2.64009e-18	0.193375	0.0183256	LIHC
cg12166502	-0.344099	-36.9073	1.49557e-34	5.44215e-29	0.371486	0.0212262	LIHC
cg12166599	-0.0830122	-13.2712	6.36971e-17	2.31785e-11	0.119487	0.0347483	LIHC
cg12175122	-0.145049	-13.6015	2.67155e-17	9.72138e-12	0.184712	0.0403354	LIHC
cg12228772	-0.176857	-19.5345	3.34383e-23	1.21677e-17	0.206855	0.0302792	LIHC
cg12230162	-0.269307	-8.54567	7.18143e-11	2.61322e-05	0.651797	0.371249	LIHC
cg12263679	-0.205651	-20.1228	1.0393e-23	3.78187e-18	0.245501	0.0357488	LIHC
cg12284142	-0.406042	-31.1236	1.94874e-31	7.09118e-26	0.439446	0.0323108	LIHC
cg12298823	-0.406471	-56.2361	2.27162e-42	8.2661e-37	0.434021	0.0208455	LIHC
cg12375308	-0.271529	-26.021	3.26363e-28	1.18759e-22	0.302537	0.0235176	LIHC
cg12413138	-0.487726	-34.0461	4.51137e-33	1.64163e-27	0.52449	0.0319614	LIHC
cg12417702	-0.0996014	-7.91622	5.62187e-10	0.000204572	0.130881	0.0397906	LIHC
cg12419462	-0.317293	-18.3349	3.96218e-22	1.44178e-16	0.356987	0.0306092	LIHC
cg12447182	-0.376379	-21.4986	7.50693e-25	2.73167e-19	0.41502	0.0407788	LIHC
cg12472218	-0.43517	-45.1153	2.90862e-38	1.05841e-32	0.504059	0.07135	LIHC
cg12481479	-0.307375	-23.8068	1.23291e-26	4.48638e-21	0.365845	0.0530906	LIHC
cg12485020	-0.124752	-7.89117	6.10625e-10	0.000222198	0.155715	0.0250484	LIHC
cg12501871	-0.342614	-21.6919	5.24816e-25	1.90973e-19	0.42063	0.0802954	LIHC
cg12521790	-0.386878	-36.4414	2.56005e-34	9.31566e-29	0.423863	0.026285	LIHC
cg12523974	-0.158667	-15.5467	2.07823e-19	7.56238e-14	0.207694	0.0378314	LIHC
cg12544391	-0.352969	-32.9915	1.6941e-32	6.16458e-27	0.381952	0.0228082	LIHC
cg12584551	-0.290584	-23.3121	2.8882e-26	1.05098e-20	0.33773	0.0356931	LIHC
cg12586718	-0.349847	-36.5705	2.20443e-34	8.02162e-29	0.437986	0.0965437	LIHC
cg12598428	-0.396361	-45.352	2.3256e-38	8.46252e-33	0.428263	0.0328343	LIHC
cg12614178	-0.368973	-28.1491	1.27495e-29	4.63938e-24	0.424915	0.0527737	LIHC
cg12614702	-0.383404	-30.449	4.86714e-31	1.77109e-25	0.442654	0.0474043	LIHC
cg12709057	-0.42081	-26.9347	7.88828e-29	2.87043e-23	0.472993	0.040773	LIHC
cg12726278	-0.300176	-15.3708	3.16774e-19	1.1527e-13	0.341249	0.0368539	LIHC
cg12727431	-0.333306	-23.509	2.0547e-26	7.47677e-21	0.376035	0.02981	LIHC
cg12747864	-0.297557	-31.6811	9.27113e-32	3.37363e-26	0.426257	0.120699	LIHC
cg12856112	0.0836881	12.2119	1.13122e-15	4.11634e-10	0.852669	0.922389	LIHC
cg12882438	-0.236794	-25.2374	1.14302e-27	4.15931e-22	0.291523	0.0498969	LIHC
cg12914043	-0.129228	-12.4167	6.41494e-16	2.33431e-10	0.180791	0.0482316	LIHC
cg12944030	-0.269284	-25.7787	4.7913e-28	1.74349e-22	0.317569	0.0516546	LIHC
cg13014545	-0.36779	-39.9579	5.14835e-36	1.87341e-30	0.387023	0.0167903	LIHC
cg13014982	-0.291882	-33.1358	1.41033e-32	5.132e-27	0.323209	0.0234278	LIHC
cg13023833	-0.517904	-46.9748	5.16553e-39	1.87966e-33	0.557719	0.0385214	LIHC
cg13024202	-0.333969	-36.2001	3.39062e-34	1.2338e-28	0.370683	0.031175	LIHC
cg13024624	-0.225126	-21.2399	1.2172e-24	4.42924e-19	0.263419	0.0303381	LIHC
cg13033283	-0.289372	-31.1007	2.00975e-31	7.31319e-26	0.322612	0.0264459	LIHC
cg13077247	0.10681	6.73085	2.94634e-08	0.0107213	0.65419	0.740293	LIHC
cg13115118	-0.347482	-26.396	1.81269e-28	6.59613e-23	0.392619	0.0332776	LIHC
cg13120260	-0.3914	-32.8192	2.11086e-32	7.68111e-27	0.426303	0.0363914	LIHC
cg13130271	-0.512869	-38.5502	2.36174e-35	8.59403e-30	0.594621	0.0732221	LIHC
cg13178935	-0.264845	-18.604	2.25095e-22	8.1909e-17	0.312452	0.0468965	LIHC
cg13182391	-0.374381	-38.9952	1.45099e-35	5.27995e-30	0.403303	0.0300002	LIHC
cg13182820	-0.405284	-30.6924	3.49095e-31	1.27031e-25	0.464904	0.0554616	LIHC
cg13189687	-0.281396	-21.0625	1.70049e-24	6.18783e-19	0.312778	0.0218243	LIHC
cg13190238	-0.169329	-16.3272	3.32976e-20	1.21165e-14	0.190428	0.015969	LIHC
cg13190540	-0.173667	-10.3556	2.47284e-13	8.99832e-08	0.4707	0.2722	LIHC
cg13192155	-0.131071	-8.13674	2.72227e-10	9.90594e-05	0.694551	0.542585	LIHC
cg13203541	-0.447985	-44.7348	4.17781e-38	1.52025e-32	0.480514	0.0285683	LIHC
cg13204538	-0.336469	-12.7265	2.74752e-16	9.99786e-11	0.576826	0.245685	LIHC
cg13208429	-0.270443	-20.3425	6.76546e-24	2.46186e-18	0.304394	0.0287442	LIHC
cg13214937	-0.17776	-20.5524	4.50492e-24	1.63928e-18	0.198833	0.0197967	LIHC
cg13217661	-0.258156	-21.0631	1.69863e-24	6.18109e-19	0.424344	0.164264	LIHC
cg13232664	-0.309117	-35.2718	1.01584e-33	3.69651e-28	0.344366	0.0292623	LIHC
cg13240932	-0.320771	-21.2673	1.15625e-24	4.20741e-19	0.349952	0.0265515	LIHC
cg13241003	-0.357344	-35.7588	5.69303e-34	2.07161e-28	0.421196	0.064774	LIHC
cg13244998	-0.501482	-43.2845	1.70698e-37	6.21148e-32	0.540633	0.0339079	LIHC
cg13273147	-0.135538	-7.07193	9.35366e-09	0.00340367	0.676888	0.493953	LIHC
cg13304035	-0.38343	-36.2858	3.06794e-34	1.11638e-28	0.417589	0.0245934	LIHC
cg13311758	-0.315464	-28.3502	9.49341e-30	3.45452e-24	0.355328	0.0271399	LIHC
cg13369210	-0.315952	-36.8496	1.59799e-34	5.81488e-29	0.479948	0.167469	LIHC
cg13371527	-0.363392	-35.8954	4.84629e-34	1.7635e-28	0.460403	0.0942074	LIHC
cg13430745	-0.220192	-17.3377	3.41029e-21	1.24096e-15	0.286192	0.0583785	LIHC
cg13440244	0.0819071	11.1187	2.55871e-14	9.31077e-09	0.888656	0.959528	LIHC
cg13501371	-0.0979609	-11.7599	4.03098e-15	1.46682e-09	0.135705	0.039936	LIHC
cg13532816	-0.275764	-31.715	8.86555e-32	3.22605e-26	0.305873	0.0273571	LIHC
cg13532885	-0.367951	-20.5092	4.89669e-24	1.78184e-18	0.64367	0.276611	LIHC
cg13569417	-0.240166	-22.2767	1.80542e-25	6.56967e-20	0.265563	0.0210265	LIHC
cg13574945	-0.543481	-53.2743	2.33128e-41	8.48322e-36	0.591286	0.0435045	LIHC
cg13628616	-0.204149	-22.9482	5.45659e-26	1.98558e-20	0.248027	0.041325	LIHC
cg13645113	-0.237766	-17.7809	1.29546e-21	4.71401e-16	0.266726	0.0316022	LIHC
cg13646297	-0.276938	-16.1957	4.51236e-20	1.64199e-14	0.367624	0.0865962	LIHC
cg13649400	-0.464745	-39.0935	1.30397e-35	4.74497e-30	0.525407	0.0584831	LIHC
cg13663706	-0.336376	-28.9178	4.17064e-30	1.51764e-24	0.405031	0.0657436	LIHC
cg13664654	-0.260207	-17.6904	1.57627e-21	5.73584e-16	0.30558	0.0367085	LIHC
cg13675050	-0.152967	-9.2648	7.1996e-12	2.61983e-06	0.224021	0.0678044	LIHC
cg13680016	-0.364784	-32.573	2.89565e-32	1.05369e-26	0.409984	0.0445756	LIHC
cg13682241	-0.325471	-17.5311	2.23039e-21	8.11608e-16	0.364521	0.0502405	LIHC
cg13699152	-0.141403	-11.3047	1.48851e-14	5.41646e-09	0.168824	0.0308287	LIHC
cg13723766	-0.324489	-38.0369	4.17055e-35	1.5176e-29	0.356292	0.0306525	LIHC
cg13751216	-0.139549	-8.50446	8.2073e-11	2.98652e-05	0.387556	0.252194	LIHC
cg13770495	0.123801	8.14753	2.62763e-10	9.56159e-05	0.810247	0.916182	LIHC
cg13771263	-0.270811	-22.638	9.44712e-26	3.43767e-20	0.329297	0.0616197	LIHC
cg13775533	-0.349074	-24.6016	3.24087e-27	1.17931e-21	0.621941	0.287732	LIHC
cg13786096	-0.203861	-23.0162	4.84137e-26	1.76171e-20	0.344528	0.139502	LIHC
cg13788004	-0.277521	-20.2146	8.68227e-24	3.15936e-18	0.299071	0.018205	LIHC
cg13789561	-0.162311	-13.8008	1.59223e-17	5.7939e-12	0.188862	0.019117	LIHC
cg13797960	-0.43419	-25.2702	1.08373e-27	3.94353e-22	0.502918	0.0767296	LIHC
cg13851721	0.142066	10.6621	9.85186e-14	3.58495e-08	0.733219	0.856835	LIHC
cg13915481	-0.430027	-49.2736	6.66495e-40	2.42528e-34	0.464865	0.0343767	LIHC
cg13919860	-0.29725	-15.9106	8.77812e-20	3.19424e-14	0.359255	0.051304	LIHC
cg13929206	0.136824	11.8941	2.75636e-15	1.003e-09	0.560988	0.683849	LIHC
cg13941987	-0.431478	-40.0309	4.76382e-36	1.73349e-30	0.470566	0.0326755	LIHC
cg13974562	-0.16193	-6.64391	3.94975e-08	0.0143726	0.314682	0.110995	LIHC
cg13985405	-0.237581	-14.8162	1.22421e-18	4.45474e-13	0.280501	0.0282725	LIHC
cg13987972	-0.0613807	-10.2041	3.9151e-13	1.42465e-07	0.101875	0.0411156	LIHC
cg13988667	-0.24076	-26.9484	7.72544e-29	2.81118e-23	0.319009	0.0759639	LIHC
cg14004892	-0.282165	-24.1122	7.3455e-27	2.67293e-21	0.33044	0.0324864	LIHC
cg14007036	-0.373371	-17.0186	6.92781e-21	2.52093e-15	0.653762	0.260567	LIHC
cg14022645	-0.180897	-23.4907	2.12027e-26	7.71537e-21	0.228418	0.0406971	LIHC
cg14029201	-0.199366	-22.3877	1.47838e-25	5.37961e-20	0.23415	0.0249157	LIHC
cg14061423	-0.251069	-21.1763	1.37186e-24	4.992e-19	0.300262	0.0466716	LIHC
cg14107136	-0.118263	-8.84667	2.72307e-11	9.90886e-06	0.208335	0.0992054	LIHC
cg14113300	-0.211518	-20.0574	1.18186e-23	4.30061e-18	0.265838	0.0517667	LIHC
cg14113919	-0.265782	-15.2213	4.54537e-19	1.654e-13	0.3183	0.0572409	LIHC
cg14123135	-0.319515	-25.4622	7.95048e-28	2.89307e-22	0.562707	0.258666	LIHC
cg14127907	-0.203396	-22.8702	6.26059e-26	2.27814e-20	0.29731	0.0919245	LIHC
cg14137558	-0.396486	-54.5361	8.51658e-42	3.09907e-36	0.443152	0.044868	LIHC
cg14191108	-0.458288	-41.0457	1.64217e-36	5.97563e-31	0.501671	0.0382409	LIHC
cg14251139	-0.10276	-9.17625	9.52618e-12	3.46644e-06	0.140552	0.0339859	LIHC
cg14295915	-0.41494	-38.1576	3.64618e-35	1.32679e-29	0.439943	0.0203652	LIHC
cg14322166	-0.338896	-20.6276	3.89751e-24	1.41825e-18	0.517996	0.182051	LIHC
cg14340500	-0.241986	-19.3819	4.5487e-23	1.65521e-17	0.316094	0.0775721	LIHC
cg14343687	-0.291118	-27.8254	2.058e-29	7.48879e-24	0.40031	0.115244	LIHC
cg14350469	-0.409501	-30.7072	3.4213e-31	1.24496e-25	0.441217	0.0195723	LIHC
cg14386202	-0.254201	-18.0265	7.63545e-22	2.77843e-16	0.310902	0.0610464	LIHC
cg14463432	-0.168417	-13.3502	5.16755e-17	1.8804e-11	0.198288	0.0282722	LIHC
cg14495054	-0.157673	-11.9401	2.42135e-15	8.81097e-10	0.282244	0.129983	LIHC
cg14513804	-0.379794	-39.8277	5.9147e-36	2.15228e-30	0.412032	0.0215206	LIHC
cg14514403	-0.223739	-14.1669	6.22587e-18	2.26551e-12	0.323139	0.114976	LIHC
cg14625604	-0.258038	-20.5463	4.55847e-24	1.65876e-18	0.288357	0.027477	LIHC
cg14688179	-0.19374	-6.89008	1.72347e-08	0.00627147	0.544642	0.367127	LIHC
cg14711543	-0.185593	-9.87942	1.0579e-12	3.84953e-07	0.224107	0.0333905	LIHC
cg14720319	-0.407872	-20.0847	1.12002e-23	4.07558e-18	0.512944	0.0954245	LIHC
cg14725109	-0.258704	-33.7363	6.62786e-33	2.41179e-27	0.305351	0.0385701	LIHC
cg14727709	0.06188	9.11699	1.1496e-11	4.18322e-06	0.860856	0.906135	LIHC
cg14745925	-0.074052	-14.12	7.01551e-18	2.55285e-12	0.11002	0.0329283	LIHC
cg14772107	-0.332541	-35.4538	8.17461e-34	2.97462e-28	0.426231	0.0892715	LIHC
cg14783837	-0.248835	-19.687	2.46306e-23	8.96273e-18	0.273479	0.0248017	LIHC
cg14804181	-0.425228	-19.942	1.48383e-23	5.39944e-18	0.533996	0.102859	LIHC
cg14812623	-0.228428	-19.8454	1.79688e-23	6.5386e-18	0.288434	0.0588909	LIHC
cg14828248	-0.288003	-11.8728	2.92705e-15	1.06511e-09	0.505905	0.225604	LIHC
cg14828865	-0.269127	-20.3823	6.26128e-24	2.27839e-18	0.31421	0.0447133	LIHC
cg14831390	-0.219515	-17.7201	1.47786e-21	5.37774e-16	0.254638	0.0330572	LIHC
cg14951132	-0.294603	-13.7977	1.60465e-17	5.83909e-12	0.402055	0.122857	LIHC
cg14961598	-0.364129	-25.238	1.1419e-27	4.1552e-22	0.438944	0.0661323	LIHC
cg14970569	-0.319631	-24.8569	2.12674e-27	7.73891e-22	0.354663	0.0359156	LIHC
cg14972002	-0.250837	-23.5237	2.00315e-26	7.28918e-21	0.275042	0.018445	LIHC
cg14993186	-0.188429	-13.2769	6.27366e-17	2.2829e-11	0.236618	0.0387394	LIHC
cg15035437	-0.353482	-26.5949	1.33084e-28	4.84275e-23	0.476498	0.121635	LIHC
cg15043283	-0.244128	-16.4167	2.70984e-20	9.86074e-15	0.289228	0.0338376	LIHC
cg15075851	-0.343377	-26.216	2.40159e-28	8.73907e-23	0.523237	0.192669	LIHC
cg15133344	-0.0544004	-7.34476	3.75064e-09	0.0013648	0.0694685	0.0189629	LIHC
cg15162843	-0.229577	-27.9623	1.67978e-29	6.11248e-24	0.291811	0.0625229	LIHC
cg15165694	-0.399805	-27.158	5.61206e-29	2.04215e-23	0.441329	0.038362	LIHC
cg15198729	-0.167557	-8.88723	2.39126e-11	8.70145e-06	0.492045	0.330102	LIHC
cg15199886	-0.436631	-32.6871	2.50027e-32	9.09813e-27	0.532028	0.0885583	LIHC
cg15234550	-0.215273	-19.9265	1.5302e-23	5.56817e-18	0.243308	0.0357618	LIHC
cg15236541	-0.297607	-15.9721	7.5999e-20	2.7655e-14	0.367266	0.0640946	LIHC
cg15255859	-0.39537	-25.512	7.3387e-28	2.67045e-22	0.442007	0.0414934	LIHC
cg15257930	-0.410032	-42.6255	3.2848e-37	1.19529e-31	0.460866	0.0500217	LIHC
cg15259400	-0.216058	-22.2045	2.05697e-25	7.48502e-20	0.251568	0.0249011	LIHC
cg15308487	-0.284436	-29.24	2.63169e-30	9.57637e-25	0.310032	0.0210832	LIHC
cg15314890	-0.0796928	-9.6805	1.95796e-12	7.12473e-07	0.0974695	0.0197802	LIHC
cg15317927	-0.317649	-25.8866	4.03709e-28	1.46904e-22	0.383571	0.0518387	LIHC
cg15345580	-0.197833	-19.304	5.32585e-23	1.938e-17	0.226273	0.0241643	LIHC
cg15373098	-0.309448	-15.5866	1.8894e-19	6.87527e-14	0.356906	0.0356031	LIHC
cg15391239	-0.381047	-34.3969	2.92958e-33	1.06603e-27	0.422313	0.0332248	LIHC
cg15392343	-0.33148	-25.2382	1.14145e-27	4.15357e-22	0.366165	0.0272776	LIHC
cg15418221	-0.399023	-35.1341	1.19816e-33	4.35993e-28	0.430567	0.0220788	LIHC
cg15443127	0.107557	12.0024	2.03177e-15	7.39334e-10	0.805799	0.896357	LIHC
cg15452747	-0.20078	-9.71405	1.76424e-12	6.41983e-07	0.606531	0.423734	LIHC
cg15465642	-0.173716	-8.65165	5.09848e-11	1.85526e-05	0.377213	0.211935	LIHC
cg15511490	-0.343798	-18.4174	3.32956e-22	1.21158e-16	0.417987	0.0643512	LIHC
cg15517690	-0.160607	-12.5326	4.66387e-16	1.69712e-10	0.188818	0.0258968	LIHC
cg15520863	-0.150384	-10.63	1.08426e-13	3.94546e-08	0.335673	0.192186	LIHC
cg15521289	-0.307078	-35.3913	8.80615e-34	3.20443e-28	0.388324	0.0803366	LIHC
cg15534364	-0.177519	-13.6523	2.34042e-17	8.51646e-12	0.215921	0.0292951	LIHC
cg15565409	-0.408345	-30.5586	4.18948e-31	1.52449e-25	0.447106	0.0307271	LIHC
cg15579650	-0.424366	-34.1083	4.17747e-33	1.52012e-27	0.483702	0.0668518	LIHC
cg15582794	-0.344848	-34.744	1.9188e-33	6.98223e-28	0.388085	0.0455698	LIHC
cg15612444	-0.20364	-17.7144	1.49601e-21	5.44378e-16	0.243668	0.0421426	LIHC
cg15661671	-0.294896	-28.798	4.95525e-30	1.80315e-24	0.391854	0.0918168	LIHC
cg15672146	-0.0580339	-8.98873	1.72899e-11	6.29155e-06	0.0877692	0.0338442	LIHC
cg15682807	-0.219924	-17.5206	2.28205e-21	8.30407e-16	0.285244	0.0638621	LIHC
cg15685776	-0.27625	-36.075	3.92465e-34	1.42813e-28	0.302968	0.0212877	LIHC
cg15686826	-0.207608	-21.7405	4.79873e-25	1.74619e-19	0.262598	0.0526924	LIHC
cg15706156	-0.192368	-11.9596	2.29175e-15	8.33934e-10	0.240628	0.0345226	LIHC
cg15720064	0.165388	17.9947	8.17364e-22	2.97427e-16	0.785856	0.945373	LIHC
cg15727409	-0.225492	-18.6424	2.07746e-22	7.55959e-17	0.261751	0.0270875	LIHC
cg15737470	-0.0849333	-8.22931	2.01045e-10	7.31574e-05	0.140337	0.053036	LIHC
cg15755924	-0.291207	-20.2108	8.74788e-24	3.18323e-18	0.343542	0.0382144	LIHC
cg15757320	-0.289765	-31.7694	8.25148e-32	3.0026e-26	0.325394	0.0294898	LIHC
cg15769969	-0.221698	-23.8808	1.08707e-26	3.95568e-21	0.260775	0.0396126	LIHC
cg15806723	-0.281526	-33.501	8.89668e-33	3.23738e-27	0.303262	0.0179315	LIHC
cg15813836	-0.179359	-10.4025	2.14649e-13	7.81076e-08	0.254617	0.0818956	LIHC
cg15816181	-0.323288	-19.4407	4.03881e-23	1.46966e-17	0.497902	0.180375	LIHC
cg15841434	-0.38581	-42.6084	3.34135e-37	1.21587e-31	0.489457	0.103359	LIHC
cg15850390	-0.266014	-10.3376	2.61118e-13	9.50174e-08	0.424707	0.163664	LIHC
cg15867166	-0.280437	-29.6145	1.54984e-30	5.63966e-25	0.406827	0.122018	LIHC
cg15874629	-0.258339	-21.8771	3.73362e-25	1.35861e-19	0.314273	0.0505193	LIHC
cg15883201	-0.142509	-11.3917	1.15729e-14	4.21122e-09	0.298233	0.164978	LIHC
cg15888279	-0.18928	-6.68756	3.40911e-08	0.0124053	0.484316	0.327961	LIHC
cg15891447	-0.286828	-20.313	7.16547e-24	2.60741e-18	0.333298	0.0438489	LIHC
cg15906052	-0.290713	-29.4929	1.83926e-30	6.69281e-25	0.370877	0.0834894	LIHC
cg15906134	0.0753447	8.28801	1.65964e-10	6.03918e-05	0.864726	0.92888	LIHC
cg15907464	-0.455287	-31.6395	9.79609e-32	3.56466e-26	0.525419	0.0581671	LIHC
cg15919369	-0.13901	-24.398	4.54711e-27	1.65463e-21	0.166628	0.0247639	LIHC
cg15953310	-0.182156	-14.1445	6.59196e-18	2.39872e-12	0.289276	0.103525	LIHC
cg16059374	-0.362633	-34.3033	3.28575e-33	1.19564e-27	0.431462	0.0650977	LIHC
cg16108684	-0.330462	-27.789	2.17268e-29	7.90608e-24	0.531552	0.21154	LIHC
cg16119423	-0.356118	-22.0935	2.51564e-25	9.15406e-20	0.425915	0.065216	LIHC
cg16140952	-0.309183	-20.7662	2.98755e-24	1.08713e-18	0.397445	0.0948729	LIHC
cg16161440	-0.219341	-28.5827	6.76525e-30	2.46178e-24	0.244828	0.0222046	LIHC
cg16181678	-0.41843	-37.4888	7.71532e-35	2.8075e-29	0.466234	0.0436695	LIHC
cg16200513	-0.172555	-11.5273	7.83133e-15	2.84971e-09	0.231773	0.0566486	LIHC
cg16211147	-0.365093	-23.9299	9.99991e-27	3.63883e-21	0.409571	0.0372555	LIHC
cg16218862	-0.141267	-18.5203	2.68215e-22	9.75998e-17	0.168899	0.0267572	LIHC
cg16221895	-0.47299	-40.0376	4.7304e-36	1.72133e-30	0.510735	0.0317434	LIHC
cg16245086	-0.366433	-32.3824	3.70398e-32	1.34783e-26	0.425483	0.0582802	LIHC
cg16248169	-0.194486	-32.5852	2.85051e-32	1.03726e-26	0.214513	0.0212962	LIHC
cg16250105	-0.154557	-21.7441	4.76707e-25	1.73467e-19	0.200393	0.0408817	LIHC
cg16257494	-0.0949156	-11.0132	3.48563e-14	1.26837e-08	0.113052	0.0177045	LIHC
cg16269097	-0.163392	-15.7574	1.25951e-19	4.58319e-14	0.194074	0.0258376	LIHC
cg16270385	-0.201303	-17.7214	1.47367e-21	5.36247e-16	0.274985	0.072603	LIHC
cg16272791	-0.304168	-32.5315	3.05446e-32	1.11147e-26	0.386555	0.0817775	LIHC
cg16315447	-0.304509	-27.6154	2.81508e-29	1.02437e-23	0.339606	0.0315229	LIHC
cg16318983	-0.389279	-22.7902	7.21131e-26	2.6241e-20	0.434205	0.0448389	LIHC
cg16328033	-0.235056	-29.8762	1.07443e-30	3.90971e-25	0.272225	0.0341457	LIHC
cg16356987	-0.220841	-25.251	1.11809e-27	4.06856e-22	0.268919	0.0442347	LIHC
cg16401529	-0.129715	-6.69626	3.31059e-08	0.0120468	0.230067	0.0883124	LIHC
cg16403901	-0.34567	-46.7375	6.41652e-39	2.33488e-33	0.414426	0.058614	LIHC
cg16411111	-0.379167	-38.622	2.1824e-35	7.94144e-30	0.428922	0.0467694	LIHC
cg16412513	-0.366665	-23.0616	4.4712e-26	1.62701e-20	0.422	0.0525419	LIHC
cg16414561	-0.245934	-9.50018	3.43552e-12	1.25014e-06	0.395861	0.143688	LIHC
cg16431713	-0.351315	-29.7534	1.2755e-30	4.64135e-25	0.405842	0.0471093	LIHC
cg16488754	-0.486397	-37.7937	5.47357e-35	1.99176e-29	0.533978	0.0465546	LIHC
cg16501779	-0.294279	-30.0819	8.07272e-31	2.93755e-25	0.322479	0.0202504	LIHC
cg16507965	-0.152177	-11.5307	7.7559e-15	2.82227e-09	0.226384	0.0707272	LIHC
cg16510010	-0.178511	-10.9258	4.50783e-14	1.64034e-08	0.225685	0.0350659	LIHC
cg16510200	-0.411275	-30.257	6.33681e-31	2.30588e-25	0.455145	0.0361547	LIHC
cg16579869	-0.0836316	-10.6702	9.61675e-14	3.4994e-08	0.104178	0.0281403	LIHC
cg16590821	-0.487948	-21.2918	1.10436e-24	4.01861e-19	0.591123	0.0961052	LIHC
cg16611264	-0.139934	-8.31901	1.49998e-10	5.45822e-05	0.209357	0.0722317	LIHC
cg16617243	-0.326471	-33.4132	9.93501e-33	3.61521e-27	0.34337	0.0244034	LIHC
cg16638301	-0.394269	-28.8529	4.57855e-30	1.66607e-24	0.43385	0.029555	LIHC
cg16641060	-0.419017	-33.2515	1.21817e-32	4.43274e-27	0.464203	0.0525382	LIHC
cg16679837	-0.275164	-17.1788	4.84833e-21	1.76424e-15	0.316708	0.0408137	LIHC
cg16680922	-0.330038	-35.3498	9.25358e-34	3.36725e-28	0.352295	0.022754	LIHC
cg16692308	-0.178876	-25.5619	6.77451e-28	2.46515e-22	0.230546	0.0462023	LIHC
cg16692973	-0.290147	-23.3252	2.82348e-26	1.02743e-20	0.336943	0.0389132	LIHC
cg16697940	-0.14351	-12.1403	1.38073e-15	5.0243e-10	0.186426	0.0446232	LIHC
cg16716035	-0.243337	-16.7972	1.13929e-20	4.14573e-15	0.28115	0.0329918	LIHC
cg16734817	-0.271084	-24.5099	3.77371e-27	1.3732e-21	0.311385	0.0313203	LIHC
cg16755924	-0.237752	-18.7794	1.56257e-22	5.68596e-17	0.322616	0.0840862	LIHC
cg16770948	-0.164177	-20.4594	5.3918e-24	1.962e-18	0.190804	0.0226499	LIHC
cg16778620	-0.24489	-28.0135	1.55719e-29	5.6664e-24	0.290877	0.0507934	LIHC
cg16796150	-0.236367	-17.5952	1.93892e-21	7.05547e-16	0.253791	0.0253383	LIHC
cg16822572	-0.15844	-13.6745	2.20926e-17	8.03919e-12	0.209068	0.0482484	LIHC
cg16867483	-0.241506	-25.8386	4.3564e-28	1.58523e-22	0.311717	0.0615936	LIHC
cg16870351	-0.319432	-16.4697	2.39968e-20	8.73208e-15	0.361638	0.0471703	LIHC
cg16917996	-0.160108	-16.069	6.05931e-20	2.2049e-14	0.205175	0.0512612	LIHC
cg16925682	0.139971	10.9286	4.47066e-14	1.62681e-08	0.772301	0.890946	LIHC
cg16940942	-0.417261	-38.689	2.0277e-35	7.37853e-30	0.496379	0.0742933	LIHC
cg16949923	-0.27533	-21.6788	5.37634e-25	1.95637e-19	0.322188	0.0353655	LIHC
cg16950696	-0.114232	-11.853	3.09624e-15	1.12668e-09	0.256909	0.135453	LIHC
cg16954455	-0.266695	-23.2965	2.96774e-26	1.07992e-20	0.419411	0.169843	LIHC
cg16963297	0.0826965	7.41007	3.01577e-09	0.0010974	0.839224	0.903761	LIHC
cg16978043	-0.0806289	-10.3745	2.33599e-13	8.50035e-08	0.10455	0.0219418	LIHC
cg16984885	-0.34153	-22.2742	1.8134e-25	6.59869e-20	0.398813	0.0617985	LIHC
cg16991511	-0.264554	-15.4619	2.54549e-19	9.26267e-14	0.311226	0.0386024	LIHC
cg16998810	-0.328265	-19.548	3.25459e-23	1.1843e-17	0.368782	0.0343927	LIHC
cg17033281	-0.238057	-24.8709	2.07819e-27	7.56226e-22	0.267577	0.0198516	LIHC
cg17036062	-0.405314	-24.6117	3.18683e-27	1.15964e-21	0.50313	0.0929088	LIHC
cg17054449	0.125152	8.31362	1.52659e-10	5.55505e-05	0.569149	0.659977	LIHC
cg17058724	-0.365796	-41.3424	1.20834e-36	4.39699e-31	0.465278	0.101869	LIHC
cg17149359	-0.316654	-39.4645	8.73006e-36	3.17675e-30	0.373812	0.0510223	LIHC
cg17155263	0.125024	8.06287	3.46914e-10	0.000126237	0.635806	0.756654	LIHC
cg17155577	-0.186498	-9.87995	1.05618e-12	3.84329e-07	0.601457	0.363976	LIHC
cg17195879	-0.364005	-44.5834	4.82907e-38	1.75723e-32	0.393932	0.0248332	LIHC
cg17207724	-0.230395	-14.0017	9.49246e-18	3.45417e-12	0.282218	0.0395384	LIHC
cg17223593	-0.328413	-29.8502	1.11409e-30	4.05402e-25	0.344616	0.0342979	LIHC
cg17231418	-0.153263	-13.0591	1.12042e-16	4.07707e-11	0.176313	0.0278757	LIHC
cg17236781	-0.244447	-23.5121	2.04361e-26	7.43641e-21	0.360302	0.117635	LIHC
cg17246352	-0.287106	-36.41	2.65525e-34	9.66207e-29	0.325624	0.0345884	LIHC
cg17279959	-0.0367085	-7.31883	4.09017e-09	0.00148836	0.0575858	0.0197087	LIHC
cg17281810	0.253404	14.8685	1.07598e-18	3.91534e-13	0.500245	0.73253	LIHC
cg17292622	-0.3897	-28.0536	1.46778e-29	5.34103e-24	0.430954	0.0345388	LIHC
cg17299883	-0.2234	-16.5356	2.06407e-20	7.51084e-15	0.277882	0.0507417	LIHC
cg17342984	-0.186752	-15.614	1.77003e-19	6.44089e-14	0.283787	0.104342	LIHC
cg17345036	-0.300053	-35.2931	9.90194e-34	3.60318e-28	0.382457	0.0759189	LIHC
cg17363084	-0.427627	-52.5587	4.16966e-41	1.51728e-35	0.462378	0.0280404	LIHC
cg17376045	-0.289666	-34.7553	1.89263e-33	6.88701e-28	0.404197	0.112833	LIHC
cg17385175	-0.23113	-10.8002	6.53424e-14	2.37772e-08	0.333374	0.0641966	LIHC
cg17386265	-0.325043	-14.1503	6.49562e-18	2.36367e-12	0.40499	0.079743	LIHC
cg17396400	-0.380535	-26.6148	1.2905e-28	4.69596e-23	0.415751	0.031673	LIHC
cg17399684	-0.456236	-63.8101	9.75538e-45	3.54985e-39	0.491265	0.0270875	LIHC
cg17404000	-0.201851	-18.0585	7.12995e-22	2.59449e-16	0.309208	0.105977	LIHC
cg17466318	-0.35449	-45.9312	1.35141e-38	4.9176e-33	0.397892	0.0399202	LIHC
cg17473615	-0.254508	-22.2132	2.02499e-25	7.36867e-20	0.423928	0.166858	LIHC
cg17517128	0.0821312	8.55384	6.99409e-11	2.54505e-05	0.845834	0.911768	LIHC
cg17547524	-0.310139	-15.6326	1.69347e-19	6.16228e-14	0.628387	0.280641	LIHC
cg17548613	-0.327446	-18.0616	7.08327e-22	2.5775e-16	0.411147	0.0685844	LIHC
cg17553592	-0.31345	-32.7307	2.36424e-32	8.60314e-27	0.509836	0.194109	LIHC
cg17565795	-0.207647	-30.0757	8.14168e-31	2.96264e-25	0.388656	0.182642	LIHC
cg17588626	-0.41563	-30.9635	2.41745e-31	8.79675e-26	0.511882	0.0944979	LIHC
cg17592148	-0.380758	-33.7917	6.18574e-33	2.2509e-27	0.472872	0.0863249	LIHC
cg17603461	-0.220212	-20.2081	8.79352e-24	3.19984e-18	0.286468	0.0652391	LIHC
cg17607496	-0.189392	-19.9674	1.41135e-23	5.13572e-18	0.233342	0.0392708	LIHC
cg17620251	-0.317617	-25.1997	1.21493e-27	4.42098e-22	0.379932	0.050756	LIHC
cg17624691	-0.365958	-22.0688	2.63131e-25	9.57497e-20	0.420086	0.0533488	LIHC
cg17639056	-0.414167	-47.9399	2.1615e-39	7.86541e-34	0.439037	0.0194935	LIHC
cg17658468	-0.287005	-26.8074	9.5901e-29	3.4897e-23	0.33681	0.0434332	LIHC
cg17703220	-0.229854	-12.0958	1.56393e-15	5.69091e-10	0.311001	0.0849737	LIHC
cg17716100	-0.169474	-13.3958	4.58275e-17	1.6676e-11	0.235233	0.058552	LIHC
cg17720011	-0.324446	-32.0078	6.03295e-32	2.19531e-26	0.377128	0.0436301	LIHC
cg17736560	-0.38204	-35.971	4.43407e-34	1.6135e-28	0.425822	0.030716	LIHC
cg17776579	-0.304615	-18.6695	1.96359e-22	7.14523e-17	0.329368	0.0275453	LIHC
cg17788031	-0.354251	-43.5639	1.2971e-37	4.71996e-32	0.396224	0.0401811	LIHC
cg17794813	-0.231721	-22.0457	2.74429e-25	9.98609e-20	0.25816	0.0254431	LIHC
cg17800714	-0.442558	-34.3452	3.12104e-33	1.1357e-27	0.478565	0.0301595	LIHC
cg17811760	-0.325987	-42.3735	4.22957e-37	1.53908e-31	0.357077	0.0297242	LIHC
cg17814335	-0.209927	-12.2102	1.13655e-15	4.13575e-10	0.523606	0.309035	LIHC
cg17818432	-0.3957	-21.164	1.40412e-24	5.10938e-19	0.49483	0.107468	LIHC
cg17824401	-0.356026	-17.5319	2.22647e-21	8.10183e-16	0.421847	0.0665236	LIHC
cg17825572	-0.317727	-20.6056	4.06596e-24	1.47955e-18	0.423949	0.113401	LIHC
cg17831869	-0.341494	-40.1389	4.24839e-36	1.54593e-30	0.374755	0.0304883	LIHC
cg17832062	-0.168427	-9.10263	1.20322e-11	4.37834e-06	0.23084	0.0550081	LIHC
cg17847781	-0.259369	-31.1263	1.9418e-31	7.06594e-26	0.353221	0.094271	LIHC
cg17863679	-0.0927837	-12.85	1.96581e-16	7.15332e-11	0.128912	0.0343613	LIHC
cg17865482	-0.219626	-23.5859	1.79975e-26	6.54904e-21	0.287634	0.0647182	LIHC
cg17868752	-0.0545316	-8.18769	2.30379e-10	8.38318e-05	0.0821837	0.0229768	LIHC
cg17877174	-0.259797	-32.7703	2.24726e-32	8.17745e-27	0.289664	0.0275377	LIHC
cg17920241	-0.34786	-30.2495	6.40334e-31	2.33009e-25	0.375318	0.0226049	LIHC
cg17959735	-0.234111	-22.8146	6.90671e-26	2.51326e-20	0.252922	0.0216134	LIHC
cg17976175	-0.254049	-17.6058	1.89458e-21	6.89412e-16	0.287151	0.0373484	LIHC
cg18000886	-0.181525	-12.8259	2.09819e-16	7.63503e-11	0.358044	0.197872	LIHC
cg18015035	-0.319686	-23.9089	1.0363e-26	3.77096e-21	0.360661	0.0417024	LIHC
cg18031773	-0.245402	-30.7603	3.18297e-31	1.15824e-25	0.274781	0.0235654	LIHC
cg18102233	-0.210582	-14.3983	3.468e-18	1.26196e-12	0.245646	0.036173	LIHC
cg18107314	-0.431424	-30.2393	6.49358e-31	2.36292e-25	0.50258	0.0738361	LIHC
cg18110168	-0.208607	-6.53784	5.6489e-08	0.0205556	0.399997	0.181986	LIHC
cg18112782	-0.365481	-38.6214	2.18384e-35	7.94668e-30	0.402583	0.0235696	LIHC
cg18124907	-0.426087	-28.7939	4.98475e-30	1.81388e-24	0.475017	0.0423914	LIHC
cg18132745	-0.355975	-36.9366	1.4463e-34	5.26289e-29	0.383388	0.0199148	LIHC
cg18140045	-0.436685	-25.2665	1.09026e-27	3.96729e-22	0.488791	0.0492374	LIHC
cg18147067	-0.270444	-15.7949	1.15274e-19	4.19464e-14	0.444156	0.173626	LIHC
cg18164076	-0.145115	-13.3554	5.09713e-17	1.85477e-11	0.181717	0.051661	LIHC
cg18225658	-0.147472	-10.3131	2.81219e-13	1.02332e-07	0.195712	0.0484182	LIHC
cg18232722	-0.157372	-7.0661	9.53848e-09	0.00347092	0.210188	0.0363737	LIHC
cg18232738	-0.34781	-27.324	4.36389e-29	1.58796e-23	0.383964	0.030015	LIHC
cg18240390	-0.233413	-18.8809	1.26645e-22	4.60843e-17	0.27775	0.0359233	LIHC
cg18273575	-0.200675	-24.2544	5.78279e-27	2.10428e-21	0.247342	0.0483739	LIHC
cg18274682	-0.212828	-30.3094	5.89617e-31	2.14553e-25	0.261871	0.0502318	LIHC
cg18288715	-0.366849	-23.5111	2.04727e-26	7.44974e-21	0.42652	0.051499	LIHC
cg18383984	-0.319544	-26.1931	2.48949e-28	9.0589e-23	0.350775	0.0219005	LIHC
cg18388301	0.0800257	7.18381	6.42713e-09	0.00233874	0.898301	0.962647	LIHC
cg18395382	-0.405785	-29.6024	1.57656e-30	5.73688e-25	0.440105	0.040856	LIHC
cg18396806	-0.33234	-30.2477	6.41868e-31	2.33567e-25	0.393791	0.0559109	LIHC
cg18397310	-0.34604	-46.7981	6.07031e-39	2.2089e-33	0.397497	0.0440408	LIHC
cg18422972	0.195347	17.7834	1.28846e-21	4.68854e-16	0.464245	0.628096	LIHC
cg18426655	-0.3547	-28.4162	8.62085e-30	3.13701e-24	0.384488	0.0208219	LIHC
cg18426869	-0.329919	-28.909	4.22351e-30	1.53688e-24	0.391579	0.0611488	LIHC
cg18452672	-0.164702	-12.6791	3.12533e-16	1.13726e-10	0.319577	0.15364	LIHC
cg18515307	-0.256793	-15.2214	4.5442e-19	1.65357e-13	0.322387	0.0559151	LIHC
cg18542573	-0.254992	-19.3757	4.60632e-23	1.67618e-17	0.30051	0.0346694	LIHC
cg18581963	-0.308637	-13.1312	9.24032e-17	3.36242e-11	0.38987	0.0780526	LIHC
cg18610025	-0.227928	-15.7344	1.32998e-19	4.83962e-14	0.24407	0.0162067	LIHC
cg18632412	-0.383364	-31.9098	6.85982e-32	2.49619e-26	0.430758	0.0460669	LIHC
cg18636716	-0.344676	-29.777	1.23411e-30	4.49075e-25	0.378665	0.0264048	LIHC
cg18689730	-0.397273	-56.2312	2.28005e-42	8.29678e-37	0.44201	0.0380765	LIHC
cg18702893	-0.0715615	-9.04317	1.45365e-11	5.28963e-06	0.141707	0.0672644	LIHC
cg18717600	-0.411675	-38.8422	1.71465e-35	6.23936e-30	0.443397	0.0249944	LIHC
cg18720642	-0.219174	-16.4185	2.69855e-20	9.81965e-15	0.297641	0.0613267	LIHC
cg18742441	-0.339452	-31.8084	7.83873e-32	2.8524e-26	0.374093	0.0212815	LIHC
cg18748981	-0.0899664	-7.11728	8.03322e-09	0.00292317	0.309237	0.236416	LIHC
cg18769303	-0.296804	-23.3255	2.82197e-26	1.02687e-20	0.350402	0.0513219	LIHC
cg18771512	0.180477	17.1347	5.34705e-21	1.94572e-15	0.698494	0.87557	LIHC
cg18796341	-0.113857	-7.90782	5.77991e-10	0.000210323	0.513625	0.36151	LIHC
cg18809883	-0.125496	-11.116	2.57879e-14	9.38385e-09	0.158408	0.0330721	LIHC
cg18816329	-0.288176	-34.3402	3.14033e-33	1.14272e-27	0.320413	0.0270849	LIHC
cg18818432	-0.250429	-14.7394	1.47998e-18	5.38546e-13	0.347675	0.100446	LIHC
cg18878700	-0.304743	-48.6364	1.16482e-39	4.23861e-34	0.329134	0.0178057	LIHC
cg18885073	-0.29412	-27.5658	3.03232e-29	1.10342e-23	0.327461	0.0319093	LIHC
cg18904224	-0.252523	-26.5257	1.48156e-28	5.3912e-23	0.36169	0.106211	LIHC
cg18932686	-0.465561	-39.0914	1.30694e-35	4.75577e-30	0.518368	0.0483611	LIHC
cg18935349	-0.373799	-19.6567	2.61702e-23	9.52298e-18	0.539986	0.171479	LIHC
cg18983709	-0.376063	-26.5873	1.34671e-28	4.90049e-23	0.41341	0.039118	LIHC
cg18989810	-0.408571	-31.0544	2.13879e-31	7.78275e-26	0.459581	0.0500112	LIHC
cg18990292	-0.361309	-24.13	7.12863e-27	2.59401e-21	0.44546	0.0838443	LIHC
cg18998000	-0.485643	-27.1508	5.67318e-29	2.06439e-23	0.516476	0.0327084	LIHC
cg19022384	-0.294754	-14.533	2.47387e-18	9.00208e-13	0.395435	0.104033	LIHC
cg19023309	-0.20264	-12.72	2.79607e-16	1.01745e-10	0.302782	0.097677	LIHC
cg19038081	-0.128099	-14.5285	2.50166e-18	9.1032e-13	0.146348	0.0154203	LIHC
cg19039368	-0.349282	-17.0888	5.92301e-21	2.1553e-15	0.430452	0.0892235	LIHC
cg19041137	-0.202271	-18.9936	1.00393e-22	3.65317e-17	0.224697	0.0200997	LIHC
cg19041765	-0.130887	-7.65603	1.32992e-09	0.000483939	0.315277	0.203903	LIHC
cg19053358	-0.247279	-15.1853	4.96063e-19	1.8051e-13	0.317745	0.0690604	LIHC
cg19056391	-0.422897	-43.6509	1.1912e-37	4.3346e-32	0.495634	0.0683538	LIHC
cg19060387	-0.354435	-42.725	2.97382e-37	1.08213e-31	0.3906	0.0306515	LIHC
cg19063141	-0.347901	-46.8618	5.72674e-39	2.08388e-33	0.39155	0.0375576	LIHC
cg19068385	-0.380616	-16.6608	1.55194e-20	5.64729e-15	0.506856	0.123567	LIHC
cg19162841	-0.391958	-21.2509	1.19231e-24	4.33865e-19	0.509281	0.128157	LIHC
cg19175479	-0.157166	-15.3322	3.47706e-19	1.26525e-13	0.304453	0.144228	LIHC
cg19180514	-0.433177	-37.5843	6.92701e-35	2.52064e-29	0.53379	0.0943938	LIHC
cg19194595	-0.307382	-44.3519	6.03189e-38	2.19492e-32	0.338284	0.0293661	LIHC
cg19214916	-0.245364	-15.9985	7.14435e-20	2.59973e-14	0.412978	0.177833	LIHC
cg19238394	-0.375519	-30.5087	4.48489e-31	1.63199e-25	0.403821	0.0230566	LIHC
cg19265708	-0.364803	-35.8198	5.29764e-34	1.92774e-28	0.430344	0.067151	LIHC
cg19267533	-0.0490911	-8.83208	2.85346e-11	1.03833e-05	0.0807249	0.0308636	LIHC
cg19332075	-0.341691	-19.5021	3.56911e-23	1.29875e-17	0.475423	0.123248	LIHC
cg19355911	-0.380467	-41.6466	8.84251e-37	3.21767e-31	0.428061	0.0469093	LIHC
cg19383360	-0.258083	-20.4384	5.61608e-24	2.04361e-18	0.338037	0.0825476	LIHC
cg19398192	-0.214856	-12.8765	1.83027e-16	6.66008e-11	0.247761	0.024701	LIHC
cg19407410	-0.448503	-34.6953	2.03563e-33	7.40738e-28	0.535216	0.09613	LIHC
cg19415339	-0.306213	-32.9005	1.90263e-32	6.92341e-27	0.332824	0.0223269	LIHC
cg19428430	-0.273106	-27.3179	4.40398e-29	1.60255e-23	0.306186	0.033098	LIHC
cg19471462	0.209541	22.781	7.32938e-26	2.66706e-20	0.597804	0.799621	LIHC
cg19490917	-0.0560547	-8.05104	3.60659e-10	0.000131239	0.0837114	0.0245772	LIHC
cg19493242	-0.296781	-32.3655	3.78586e-32	1.37762e-26	0.334304	0.0311231	LIHC
cg19505129	-0.343848	-12.4512	5.83377e-16	2.12283e-10	0.561518	0.201996	LIHC
cg19506937	-0.240477	-30.4535	4.8373e-31	1.76023e-25	0.274084	0.0270374	LIHC
cg19525496	-0.226693	-14.2784	4.69277e-18	1.70763e-12	0.252968	0.0320516	LIHC
cg19528502	-0.261697	-20.9921	1.94285e-24	7.06975e-19	0.300109	0.0288106	LIHC
cg19532714	-0.138229	-21.368	9.57585e-25	3.48452e-19	0.183137	0.0468633	LIHC
cg19579913	-0.322519	-37.8128	5.3578e-35	1.94963e-29	0.352757	0.0270888	LIHC
cg19580826	-0.240603	-25.0624	1.51908e-27	5.52773e-22	0.292457	0.0495013	LIHC
cg19585278	0.152725	8.45684	9.57881e-11	3.48559e-05	0.570292	0.708971	LIHC
cg19587616	-0.350447	-37.0547	1.26348e-34	4.59764e-29	0.379863	0.0205527	LIHC
cg19605909	-0.258545	-18.8312	1.40349e-22	5.10712e-17	0.352172	0.0929095	LIHC
cg19631766	-0.158899	-15.0308	7.22684e-19	2.62975e-13	0.198342	0.0382687	LIHC
cg19635884	-0.310959	-27.5161	3.26702e-29	1.18882e-23	0.346805	0.0312902	LIHC
cg19638040	-0.369968	-30.2579	6.32911e-31	2.30308e-25	0.407652	0.032142	LIHC
cg19718903	-0.346108	-21.3168	1.0539e-24	3.83498e-19	0.478233	0.107327	LIHC
cg19731655	-0.133699	-13.6806	2.17431e-17	7.912e-12	0.21841	0.0865619	LIHC
cg19736094	-0.145456	-9.12892	1.10685e-11	4.02769e-06	0.305632	0.166378	LIHC
cg19736647	-0.299898	-18.2816	4.43524e-22	1.61392e-16	0.374013	0.0582281	LIHC
cg19748438	-0.242875	-23.7449	1.37054e-26	4.98719e-21	0.279312	0.0337078	LIHC
cg19754833	-0.180165	-11.4587	9.53973e-15	3.47138e-09	0.220929	0.0406379	LIHC
cg19780807	-0.277264	-32.2133	4.61356e-32	1.67881e-26	0.317492	0.0316646	LIHC
cg19787517	-0.173885	-15.4751	2.46628e-19	8.97444e-14	0.278569	0.0983332	LIHC
cg19800913	-0.32017	-29.2377	2.64023e-30	9.60742e-25	0.34866	0.0310999	LIHC
cg19821612	-0.35342	-22.5465	1.11234e-25	4.04764e-20	0.406286	0.0559667	LIHC
cg19840133	-0.180114	-7.26261	4.93643e-09	0.0017963	0.230279	0.0391535	LIHC
cg19855812	-0.221613	-22.3607	1.55168e-25	5.64636e-20	0.251927	0.0311498	LIHC
cg19860695	-0.39109	-32.6492	2.62505e-32	9.5522e-27	0.457501	0.057789	LIHC
cg19867709	-0.252438	-17.2546	4.09793e-21	1.49118e-15	0.280377	0.0290213	LIHC
cg19897275	-0.161656	-16.5992	1.78511e-20	6.49576e-15	0.190649	0.0252506	LIHC
cg19918759	-0.215391	-13.6673	2.25099e-17	8.19102e-12	0.324936	0.109657	LIHC
cg19937618	-0.347326	-29.8701	1.08366e-30	3.9433e-25	0.428402	0.0781406	LIHC
cg19939909	-0.397283	-28.5192	7.41955e-30	2.69987e-24	0.431472	0.0324339	LIHC
cg19944582	-0.19092	-28.0839	1.4036e-29	5.1075e-24	0.216611	0.0255872	LIHC
cg19963797	-0.214903	-12.4772	5.43033e-16	1.97602e-10	0.26615	0.0569072	LIHC
cg19997062	-0.155638	-13.9576	1.06286e-17	3.86761e-12	0.195804	0.0477428	LIHC
cg19998137	-0.381799	-29.7461	1.28864e-30	4.68918e-25	0.440194	0.0548652	LIHC
cg20015269	-0.485038	-48.9786	8.6233e-40	3.1379e-34	0.537178	0.0414525	LIHC
cg20018767	-0.253296	-24.2076	6.25522e-27	2.27619e-21	0.314323	0.0631314	LIHC
cg20020143	-0.178499	-11.2288	1.85563e-14	6.75237e-09	0.205656	0.0221616	LIHC
cg20033444	-0.186548	-9.12033	1.13747e-11	4.13908e-06	0.660012	0.455629	LIHC
cg20074774	-0.312693	-27.1098	6.03862e-29	2.19737e-23	0.388185	0.0698793	LIHC
cg20077602	-0.313541	-31.7209	8.79678e-32	3.20102e-26	0.353285	0.0257666	LIHC
cg20081453	-0.255049	-19.9333	1.50969e-23	5.49355e-18	0.324408	0.0683743	LIHC
cg20085077	-0.33237	-13.2317	7.073e-17	2.57377e-11	0.502191	0.16408	LIHC
cg20113724	-0.375229	-45.1663	2.77161e-38	1.00855e-32	0.415847	0.0283379	LIHC
cg20116159	-0.266429	-22.654	9.18286e-26	3.34151e-20	0.312788	0.0410388	LIHC
cg20121427	-0.306972	-29.1676	2.91726e-30	1.06155e-24	0.366504	0.0528393	LIHC
cg20129827	0.129048	6.66478	3.68134e-08	0.0133959	0.641554	0.743206	LIHC
cg20134820	-0.354149	-30.0882	8.00174e-31	2.91172e-25	0.423558	0.0663013	LIHC
cg20135706	-0.126616	-14.6983	1.63875e-18	5.96317e-13	0.269168	0.132933	LIHC
cg20197861	-0.114093	-8.21133	2.13223e-10	7.7589e-05	0.129985	0.0176485	LIHC
cg20202246	-0.212942	-13.817	1.5267e-17	5.55543e-12	0.634028	0.404826	LIHC
cg20207108	-0.40945	-26.4442	1.68165e-28	6.11929e-23	0.444197	0.0281832	LIHC
cg20208613	-0.408824	-47.9977	2.05283e-39	7.46998e-34	0.43718	0.0207855	LIHC
cg20214004	-0.286749	-14.3663	3.75878e-18	1.36777e-12	0.464344	0.175088	LIHC
cg20279598	-0.170949	-13.594	2.72477e-17	9.91505e-12	0.212009	0.0383693	LIHC
cg20281601	-0.265967	-16.3898	2.88284e-20	1.04902e-14	0.293461	0.0280261	LIHC
cg20291321	-0.310324	-22.2245	1.9838e-25	7.21879e-20	0.428263	0.123561	LIHC
cg20312916	-0.264572	-15.8813	9.40476e-20	3.42226e-14	0.315262	0.0489111	LIHC
cg20347665	-0.119862	-9.98118	7.73596e-13	2.81501e-07	0.152582	0.0305237	LIHC
cg20348344	0.354271	48.8456	9.68977e-40	3.52597e-34	0.620667	0.965377	LIHC
cg20359784	-0.278326	-26.4828	1.58364e-28	5.76263e-23	0.302446	0.0281973	LIHC
cg20372745	-0.310574	-16.9523	8.03696e-21	2.92454e-15	0.349535	0.0365386	LIHC
cg20373036	-0.25911	-15.4256	2.77695e-19	1.01049e-13	0.393388	0.150729	LIHC
cg20420363	-0.255757	-23.6001	1.75652e-26	6.39173e-21	0.285736	0.0203156	LIHC
cg20421037	-0.403806	-38.0164	4.26685e-35	1.55265e-29	0.439081	0.0257089	LIHC
cg20442640	-0.350324	-37.3405	9.12567e-35	3.32071e-29	0.404451	0.055029	LIHC
cg20445038	-0.414536	-41.5063	1.02101e-36	3.71531e-31	0.446372	0.0254964	LIHC
cg20455959	-0.478975	-29.0803	3.30444e-30	1.20244e-24	0.535263	0.0536651	LIHC
cg20457259	-0.157512	-9.56213	2.83075e-12	1.03007e-06	0.352848	0.189913	LIHC
cg20484507	-0.333471	-42.1543	5.27644e-37	1.92002e-31	0.377393	0.049727	LIHC
cg20485230	-0.13205	-12.2751	9.48862e-16	3.45278e-10	0.168788	0.0311146	LIHC
cg20498086	-0.376877	-28.5662	6.92937e-30	2.5215e-24	0.398606	0.0207089	LIHC
cg20509119	-0.165158	-9.08264	1.28212e-11	4.66545e-06	0.372263	0.219225	LIHC
cg20517444	-0.303659	-25.8015	4.62047e-28	1.68133e-22	0.333297	0.0339965	LIHC
cg20549224	-0.292091	-21.2764	1.13682e-24	4.13673e-19	0.355974	0.0479897	LIHC
cg20589243	-0.261249	-17.1712	4.92996e-21	1.79394e-15	0.316566	0.0564728	LIHC
cg20597646	-0.348973	-13.9663	1.03932e-17	3.78195e-12	0.449584	0.132377	LIHC
cg20662913	-0.236346	-12.8642	1.89184e-16	6.88414e-11	0.279171	0.0288572	LIHC
cg20746035	-0.316134	-40.3318	3.46467e-36	1.26074e-30	0.353325	0.0297488	LIHC
cg20749341	-0.485949	-37.0539	1.26461e-34	4.60175e-29	0.530694	0.0331059	LIHC
cg20766178	-0.506837	-60.8431	7.62173e-44	2.77344e-38	0.559825	0.0496501	LIHC
cg20773149	-0.150937	-12.7229	2.77472e-16	1.00968e-10	0.194575	0.0302326	LIHC
cg20775112	-0.133871	-14.0145	9.18653e-18	3.34285e-12	0.153863	0.0169403	LIHC
cg20793193	-0.320527	-32.4239	3.51022e-32	1.27732e-26	0.365005	0.0395513	LIHC
cg20844384	0.118236	7.80815	8.03369e-10	0.000292335	0.78294	0.886058	LIHC
cg20858239	-0.263729	-15.4253	2.77938e-19	1.01138e-13	0.474265	0.167181	LIHC
cg20979765	-0.256578	-24.6633	2.92607e-27	1.06476e-21	0.42973	0.168513	LIHC
cg20983329	-0.306137	-20.77	2.9659e-24	1.07925e-18	0.401912	0.0928939	LIHC
cg21016188	-0.445799	-27.8266	2.05444e-29	7.47582e-24	0.490485	0.0402285	LIHC
cg21019788	-0.299208	-40.3325	3.46215e-36	1.25983e-30	0.421988	0.119526	LIHC
cg21040109	-0.288003	-18.5855	2.33989e-22	8.51454e-17	0.31354	0.0306251	LIHC
cg21040569	-0.331935	-29.0077	3.66608e-30	1.33403e-24	0.402138	0.0801092	LIHC
cg21114303	-0.364913	-23.7255	1.41673e-26	5.15527e-21	0.630225	0.270948	LIHC
cg21137943	-0.44946	-27.1686	5.52235e-29	2.0095e-23	0.512964	0.057304	LIHC
cg21156383	-0.266923	-15.5609	2.00891e-19	7.31015e-14	0.297231	0.0383946	LIHC
cg21161328	-0.284749	-27.9078	1.82105e-29	6.62653e-24	0.323215	0.030457	LIHC
cg21179956	-0.322869	-26.4708	1.6135e-28	5.87132e-23	0.412743	0.0868653	LIHC
cg21202708	-0.212696	-15.8455	1.02309e-19	3.72289e-14	0.243406	0.0205398	LIHC
cg21205654	-0.196658	-23.8577	1.13051e-26	4.11378e-21	0.478513	0.277635	LIHC
cg21284493	-0.454243	-45.901	1.38996e-38	5.05787e-33	0.52528	0.0746358	LIHC
cg21290550	-0.494748	-42.5344	3.59869e-37	1.30951e-31	0.542634	0.0460026	LIHC
cg21304892	-0.347496	-48.1576	1.78003e-39	6.4773e-34	0.373245	0.0258419	LIHC
cg21327581	-0.387712	-40.1797	4.0685e-36	1.48047e-30	0.427053	0.0319951	LIHC
cg21331369	-0.323311	-21.9824	3.07952e-25	1.12059e-19	0.358587	0.0366981	LIHC
cg21331812	-0.3009	-14.7199	1.55336e-18	5.65245e-13	0.421665	0.114571	LIHC
cg21341170	-0.381927	-19.0826	8.36471e-23	3.0438e-17	0.508896	0.139894	LIHC
cg21361971	0.124608	15.0969	6.15032e-19	2.23802e-13	0.752476	0.880922	LIHC
cg21362390	-0.416894	-21.4136	8.7941e-25	3.20005e-19	0.598175	0.182565	LIHC
cg21364772	-0.291245	-24.3717	4.75115e-27	1.72888e-21	0.316979	0.0244738	LIHC
cg21411942	-0.243107	-25.3596	9.37927e-28	3.41299e-22	0.283818	0.0434568	LIHC
cg21473514	-0.374601	-62.2433	2.8546e-44	1.03875e-38	0.468463	0.0932936	LIHC
cg21474854	-0.278423	-32.5771	2.8802e-32	1.04806e-26	0.318077	0.0357861	LIHC
cg21480420	-0.298142	-20.015	1.28486e-23	4.67543e-18	0.455623	0.169145	LIHC
cg21484182	-0.250307	-13.0829	1.05122e-16	3.82525e-11	0.309284	0.0458839	LIHC
cg21502819	0.114368	13.3461	5.22459e-17	1.90115e-11	0.685403	0.787545	LIHC
cg21545785	-0.318646	-22.061	2.66866e-25	9.71088e-20	0.349656	0.0214644	LIHC
cg21547183	-0.232801	-18.0262	7.64065e-22	2.78032e-16	0.335647	0.10984	LIHC
cg21595968	-0.258286	-11.6322	5.80011e-15	2.11058e-09	0.431429	0.177446	LIHC
cg21597797	-0.231242	-16.351	3.15172e-20	1.14687e-14	0.264466	0.0389026	LIHC
cg21602092	-0.213006	-12.9443	1.52448e-16	5.54736e-11	0.258085	0.0349093	LIHC
cg21604054	-0.300274	-21.8101	4.22179e-25	1.53625e-19	0.334043	0.0252771	LIHC
cg21727314	-0.23647	-22.2954	1.74564e-25	6.35212e-20	0.272953	0.0282349	LIHC
cg21762935	-0.230218	-13.9005	1.23085e-17	4.4789e-12	0.284134	0.0466783	LIHC
cg21773962	-0.381226	-21.6832	5.3329e-25	1.94057e-19	0.451625	0.0837699	LIHC
cg21776057	-0.196416	-15.6292	1.70707e-19	6.21179e-14	0.242094	0.0376459	LIHC
cg21785054	-0.27551	-22.6859	8.6762e-26	3.15715e-20	0.334749	0.0507769	LIHC
cg21786233	-0.162863	-10.3637	2.41337e-13	8.78192e-08	0.27977	0.132755	LIHC
cg21864225	-0.223958	-16.009	6.97104e-20	2.53666e-14	0.333987	0.105084	LIHC
cg21864829	-0.385549	-34.4326	2.80425e-33	1.02043e-27	0.489423	0.0998873	LIHC
cg21880156	-0.252726	-17.3523	3.30274e-21	1.20182e-15	0.306252	0.0557038	LIHC
cg21881821	-0.431481	-50.4762	2.3681e-40	8.6172e-35	0.460838	0.0251948	LIHC
cg21887683	-0.269543	-29.2551	2.57583e-30	9.37309e-25	0.300219	0.0268128	LIHC
cg21888438	-0.219333	-21.0937	1.6031e-24	5.83346e-19	0.259776	0.0414623	LIHC
cg21890239	-0.36525	-21.7404	4.79893e-25	1.74626e-19	0.455519	0.0866639	LIHC
cg21899276	-0.195249	-12.7678	2.45613e-16	8.93752e-11	0.22486	0.0210847	LIHC
cg21903569	-0.292583	-29.588	1.60861e-30	5.85352e-25	0.318179	0.023415	LIHC
cg21911363	-0.34434	-37.1713	1.1061e-34	4.02494e-29	0.364793	0.0216563	LIHC
cg21940586	-0.282868	-13.2656	6.46397e-17	2.35215e-11	0.339549	0.0505095	LIHC
cg21945665	-0.241581	-19.5733	3.09313e-23	1.12555e-17	0.327674	0.081698	LIHC
cg21953876	-0.389599	-31.7525	8.43695e-32	3.07009e-26	0.423898	0.0321322	LIHC
cg21960840	-0.308534	-23.128	3.98058e-26	1.44848e-20	0.337125	0.0187781	LIHC
cg21966453	-0.347634	-37.0807	1.22642e-34	4.46277e-29	0.369236	0.0146418	LIHC
cg21978299	-0.217294	-20.0139	1.28751e-23	4.68509e-18	0.240276	0.0203466	LIHC
cg22010791	0.0709908	8.41786	1.08719e-10	3.95614e-05	0.905112	0.972179	LIHC
cg22044840	-0.295138	-24.0169	8.62848e-27	3.13978e-21	0.331519	0.030803	LIHC
cg22050539	-0.182874	-20.7182	3.27521e-24	1.1918e-18	0.215688	0.0363828	LIHC
cg22055524	-0.302887	-33.3144	1.1251e-32	4.0941e-27	0.343115	0.0364679	LIHC
cg22069441	-0.172864	-18.1674	5.65198e-22	2.05668e-16	0.192967	0.0233669	LIHC
cg22069989	-0.351608	-23.3144	2.87671e-26	1.04679e-20	0.400874	0.0502246	LIHC
cg22151216	-0.237006	-22.9851	5.1138e-26	1.86084e-20	0.277542	0.0296473	LIHC
cg22164912	-0.398395	-45.7016	1.67443e-38	6.093e-33	0.422116	0.0151661	LIHC
cg22191603	-0.344826	-26.9128	8.15728e-29	2.96832e-23	0.427537	0.0822692	LIHC
cg22206855	-0.186876	-19.4848	3.69528e-23	1.34466e-17	0.230279	0.0399876	LIHC
cg22219869	-0.0706006	-6.41008	8.69419e-08	0.0316369	0.121533	0.0439863	LIHC
cg22223600	-0.415586	-25.842	4.3329e-28	1.57668e-22	0.49033	0.0642798	LIHC
cg22223709	0.242579	29.7265	1.32451e-30	4.8197e-25	0.704012	0.947051	LIHC
cg22226984	0.0641568	7.97752	4.59353e-10	0.000167152	0.79544	0.856253	LIHC
cg22275278	-0.385977	-37.9807	4.44008e-35	1.61568e-29	0.442239	0.0441727	LIHC
cg22332884	-0.310256	-21.8388	4.0051e-25	1.4574e-19	0.34777	0.0336868	LIHC
cg22355031	0.209501	13.2677	6.42859e-17	2.33927e-11	0.574782	0.772664	LIHC
cg22364374	-0.232128	-10.7536	7.50384e-14	2.73054e-08	0.342413	0.125802	LIHC
cg22366618	-0.308214	-26.389	1.83251e-28	6.66824e-23	0.427603	0.117584	LIHC
cg22417589	-0.357728	-32.2097	4.63474e-32	1.68652e-26	0.393638	0.0378773	LIHC
cg22449896	-0.39904	-25.4745	7.79479e-28	2.83642e-22	0.475702	0.0623685	LIHC
cg22561883	-0.372245	-40.5445	2.76994e-36	1.00794e-30	0.408054	0.028614	LIHC
cg22569587	-0.19797	-10.5019	1.5913e-13	5.79052e-08	0.296653	0.124202	LIHC
cg22575892	-0.182697	-9.07461	1.31529e-11	4.78616e-06	0.566973	0.345435	LIHC
cg22601215	-0.130322	-12.1862	1.21497e-15	4.42111e-10	0.311366	0.177715	LIHC
cg22662205	-0.340436	-28.5079	7.54262e-30	2.74466e-24	0.403898	0.0557586	LIHC
cg22672606	-0.121401	-10.7144	8.43215e-14	3.06834e-08	0.157704	0.0373085	LIHC
cg22674664	-0.326571	-27.9588	1.68835e-29	6.14369e-24	0.385567	0.0498659	LIHC
cg22682304	-0.376966	-26.0153	3.29301e-28	1.19828e-22	0.448776	0.0634601	LIHC
cg22682567	-0.410839	-29.4865	1.85614e-30	6.75425e-25	0.447929	0.0319847	LIHC
cg22702707	-0.0434417	-6.87407	1.81885e-08	0.00661854	0.103639	0.0618228	LIHC
cg22776211	-0.475735	-41.2582	1.31804e-36	4.79615e-31	0.548428	0.0749171	LIHC
cg22784592	-0.263793	-21.0997	1.58518e-24	5.76825e-19	0.280933	0.0157029	LIHC
cg22817042	-0.398539	-40.8997	1.9111e-36	6.95421e-31	0.46591	0.0649296	LIHC
cg22817647	-0.347135	-34.0515	4.48105e-33	1.63059e-27	0.381229	0.0258925	LIHC
cg22820312	-0.167937	-21.2044	1.30126e-24	4.7351e-19	0.26166	0.094761	LIHC
cg22822140	-0.171929	-6.32881	1.14388e-07	0.0416243	0.747187	0.554708	LIHC
cg22823009	-0.204689	-12.9017	1.71012e-16	6.2229e-11	0.274897	0.0766009	LIHC
cg22823767	-0.330238	-35.3311	9.46218e-34	3.44315e-28	0.386577	0.0439735	LIHC
cg22846914	-0.150539	-9.39758	4.73903e-12	1.72447e-06	0.201189	0.0535898	LIHC
cg22850802	-0.24892	-21.9209	3.44583e-25	1.25389e-19	0.273982	0.0201326	LIHC
cg22913932	-0.24734	-27.9525	1.70426e-29	6.20157e-24	0.292239	0.0373756	LIHC
cg22918218	-0.240084	-20.0705	1.15178e-23	4.19117e-18	0.274377	0.0249177	LIHC
cg22951728	-0.196966	-10.8672	5.35818e-14	1.94977e-08	0.494709	0.257092	LIHC
cg22969661	-0.400002	-49.0833	7.86843e-40	2.86321e-34	0.436486	0.0293681	LIHC
cg22970017	-0.209459	-7.47305	2.44436e-09	0.000889468	0.445108	0.211357	LIHC
cg23064627	-0.361705	-24.9352	1.87038e-27	6.80605e-22	0.400823	0.0303109	LIHC
cg23091104	-0.195754	-20.288	7.52303e-24	2.73752e-18	0.228056	0.0350278	LIHC
cg23121114	-0.424964	-41.7305	8.11621e-37	2.95338e-31	0.447503	0.0201875	LIHC
cg23124867	-0.358834	-22.1884	2.11784e-25	7.70653e-20	0.385025	0.0333916	LIHC
cg23143524	-0.450777	-36.1461	3.61131e-34	1.3141e-28	0.478051	0.0332059	LIHC
cg23175583	-0.318955	-21.6884	5.28179e-25	1.92197e-19	0.357509	0.0247374	LIHC
cg23181142	-0.132487	-17.1055	5.70584e-21	2.07627e-15	0.163975	0.0407238	LIHC
cg23184276	-0.389654	-45.2533	2.55261e-38	9.28858e-33	0.417146	0.0249938	LIHC
cg23214760	-0.242482	-27.6247	2.77615e-29	1.0102e-23	0.261458	0.0185075	LIHC
cg23214992	-0.335242	-31.3492	1.44063e-31	5.24227e-26	0.382104	0.0461592	LIHC
cg23218997	-0.188994	-9.78364	1.42205e-12	5.17465e-07	0.301711	0.0935387	LIHC
cg23221544	-0.22192	-20.8932	2.34437e-24	8.53085e-19	0.26394	0.0415441	LIHC
cg23238793	-0.108128	-6.94018	1.45618e-08	0.00529884	0.302647	0.216283	LIHC
cg23238851	-0.154959	-17.262	4.03097e-21	1.46681e-15	0.177796	0.0191973	LIHC
cg23245720	-0.211036	-6.81756	2.19999e-08	0.00800545	0.623344	0.39456	LIHC
cg23251359	-0.469548	-43.1052	2.03777e-37	7.41514e-32	0.56012	0.0954885	LIHC
cg23299576	-0.380323	-25.9092	3.89452e-28	1.41716e-22	0.422246	0.0448766	LIHC
cg23299641	-0.185367	-11.6694	5.21542e-15	1.89782e-09	0.561485	0.390814	LIHC
cg23323276	-0.264118	-30.6375	3.76185e-31	1.36888e-25	0.299272	0.0287481	LIHC
cg23323745	-0.305625	-26.5672	1.38934e-28	5.05561e-23	0.339621	0.0252245	LIHC
cg23356769	-0.291425	-15.8424	1.0305e-19	3.74985e-14	0.560884	0.271275	LIHC
cg23408987	-0.347432	-40.9058	1.89904e-36	6.91033e-31	0.385648	0.0307058	LIHC
cg23429746	-0.453036	-32.676	2.53634e-32	9.22938e-27	0.535971	0.0712204	LIHC
cg23443158	-0.405684	-39.792	6.14416e-36	2.23577e-30	0.441945	0.0373563	LIHC
cg23455407	-0.325973	-17.266	3.99597e-21	1.45408e-15	0.381192	0.0563853	LIHC
cg23475462	-0.194395	-17.6027	1.9076e-21	6.94149e-16	0.256194	0.0545292	LIHC
cg23475921	-0.256239	-21.0809	1.64238e-24	5.97638e-19	0.366915	0.106213	LIHC
cg23476456	-0.107764	-10.1144	5.14458e-13	1.87204e-07	0.168735	0.0577312	LIHC
cg23478805	0.0757576	9.28858	6.67897e-12	2.43038e-06	0.874028	0.943125	LIHC
cg23483095	-0.253427	-23.9602	9.49886e-27	3.4565e-21	0.336308	0.0848431	LIHC
cg23484208	-0.311745	-38.3654	2.89578e-35	1.05374e-29	0.343448	0.0299868	LIHC
cg23493872	-0.484551	-40.2302	3.85719e-36	1.40358e-30	0.531132	0.0415993	LIHC
cg23503517	-0.428538	-41.0506	1.63373e-36	5.94492e-31	0.460888	0.0267773	LIHC
cg23517015	0.0738521	11.1316	2.46393e-14	8.96588e-09	0.864394	0.934189	LIHC
cg23534593	-0.268575	-20.415	5.87653e-24	2.13839e-18	0.329407	0.0604975	LIHC
cg23543766	-0.402048	-36.8411	1.61364e-34	5.87181e-29	0.438029	0.0258091	LIHC
cg23612178	-0.235051	-24.9373	1.8638e-27	6.7821e-22	0.260105	0.0212497	LIHC
cg23623404	-0.304505	-25.265	1.09291e-27	3.97694e-22	0.404533	0.102103	LIHC
cg23627980	-0.418733	-30.4121	5.11985e-31	1.86304e-25	0.476625	0.0540719	LIHC
cg23628411	-0.0919582	-6.44239	7.79584e-08	0.028368	0.204406	0.11736	LIHC
cg23660678	-0.322705	-14.5002	2.68528e-18	9.77134e-13	0.440804	0.0993522	LIHC
cg23696472	-0.550005	-33.8865	5.49778e-33	2.00057e-27	0.595558	0.0421171	LIHC
cg23712855	-0.44342	-36.1496	3.59645e-34	1.3087e-28	0.47448	0.0231778	LIHC
cg23722334	-0.360875	-24.1678	6.68888e-27	2.43399e-21	0.608455	0.247537	LIHC
cg23724412	-0.32688	-33.6029	7.82941e-33	2.84901e-27	0.42541	0.093288	LIHC
cg23731466	-0.117115	-20.8149	2.7222e-24	9.9057e-19	0.264513	0.145563	LIHC
cg23737407	0.232638	9.89363	1.01259e-12	3.68468e-07	0.40514	0.585966	LIHC
cg23774896	-0.122731	-9.23817	7.83139e-12	2.84973e-06	0.157846	0.0277261	LIHC
cg23834765	-0.427555	-38.8319	1.73395e-35	6.30959e-30	0.494778	0.0664638	LIHC
cg23851205	-0.123577	-17.971	8.59966e-22	3.1293e-16	0.153848	0.0293659	LIHC
cg23852001	-0.261974	-24.1691	6.67368e-27	2.42846e-21	0.315441	0.0449461	LIHC
cg23857909	-0.433816	-54.2107	1.10173e-41	4.00905e-36	0.470333	0.0283569	LIHC
cg23860088	-0.248073	-29.1481	2.99949e-30	1.09147e-24	0.277644	0.0250251	LIHC
cg23881693	-0.161416	-12.8095	2.19374e-16	7.9827e-11	0.195302	0.0372557	LIHC
cg23893389	-0.132328	-10.5333	1.44819e-13	5.26978e-08	0.157074	0.0227278	LIHC
cg23896353	-0.351624	-20.9118	2.26321e-24	8.23549e-19	0.393442	0.0422968	LIHC
cg23905908	-0.110633	-8.56661	6.7108e-11	2.44197e-05	0.165301	0.0574684	LIHC
cg23906224	-0.0626836	-10.2913	3.00436e-13	1.09324e-07	0.0788027	0.0205202	LIHC
cg23919845	-0.359436	-29.5218	1.7659e-30	6.42586e-25	0.407505	0.0414596	LIHC
cg23932180	-0.0704887	-7.57407	1.74621e-09	0.000635422	0.133835	0.0535749	LIHC
cg23948993	-0.130271	-11.0121	3.49662e-14	1.27237e-08	0.182502	0.0499437	LIHC
cg23951868	-0.439882	-51.2437	1.2387e-40	4.50747e-35	0.469544	0.0222087	LIHC
cg23954206	-0.349562	-25.9684	3.54665e-28	1.29058e-22	0.391699	0.0408167	LIHC
cg23955842	-0.281088	-17.4714	2.54178e-21	9.24917e-16	0.332311	0.043902	LIHC
cg23989768	0.231666	11.0634	3.00834e-14	1.09469e-08	0.505443	0.692712	LIHC
cg23990273	-0.347111	-22.3229	1.66109e-25	6.04449e-20	0.421895	0.0693346	LIHC
cg23993836	-0.326473	-29.4875	1.8535e-30	6.74463e-25	0.388045	0.0494511	LIHC
cg24000218	-0.253878	-14.7619	1.39975e-18	5.0935e-13	0.322582	0.0702439	LIHC
cg24001644	-0.153495	-13.4792	3.67982e-17	1.33904e-11	0.265997	0.105481	LIHC
cg24034992	-0.278621	-35.7333	5.86755e-34	2.13512e-28	0.316849	0.0322818	LIHC
cg24035229	-0.311152	-34.4189	2.8517e-33	1.03769e-27	0.349428	0.0307545	LIHC
cg24046087	-0.12045	-10.8329	5.93115e-14	2.15826e-08	0.181355	0.0662417	LIHC
cg24152857	-0.278628	-12.7334	2.69623e-16	9.81119e-11	0.331809	0.0513395	LIHC
cg24153916	-0.168009	-9.99812	7.34402e-13	2.67239e-07	0.255498	0.0824897	LIHC
cg24156746	-0.334937	-45.1783	2.74009e-38	9.9708e-33	0.386563	0.04282	LIHC
cg24157854	-0.323524	-28.0232	1.53512e-29	5.5861e-24	0.3727	0.0378738	LIHC
cg24186901	-0.50214	-37.5886	6.89351e-35	2.50845e-29	0.537106	0.0265282	LIHC
cg24195365	-0.298631	-30.571	4.11898e-31	1.49884e-25	0.344598	0.0369146	LIHC
cg24202706	-0.353795	-23.0552	4.52133e-26	1.64525e-20	0.47499	0.118695	LIHC
cg24275475	-0.290273	-14.241	5.15894e-18	1.87727e-12	0.387182	0.103877	LIHC
cg24328927	-0.402962	-29.8965	1.04445e-30	3.80059e-25	0.490631	0.0921511	LIHC
cg24347720	-0.376358	-18.3905	3.52374e-22	1.28224e-16	0.41197	0.0310439	LIHC
cg24383344	-0.106425	-7.02866	1.08163e-08	0.0039359	0.451473	0.363982	LIHC
cg24392532	-0.147184	-8.21516	2.10571e-10	7.66239e-05	0.229105	0.0868913	LIHC
cg24401557	-0.411379	-27.6997	2.48197e-29	9.03156e-24	0.477608	0.0781025	LIHC
cg24461939	-0.194972	-18.1522	5.83777e-22	2.12428e-16	0.224234	0.0329299	LIHC
cg24496423	-0.19277	-8.16209	2.50526e-10	9.11628e-05	0.562195	0.364049	LIHC
cg24536689	-0.371455	-36.6109	2.10378e-34	7.65537e-29	0.449408	0.0888267	LIHC
cg24547622	-0.186476	-31.2192	1.71413e-31	6.23747e-26	0.211369	0.0244777	LIHC
cg24549608	-0.277728	-26.195	2.48213e-28	9.03212e-23	0.318787	0.0318329	LIHC
cg24552529	-0.197595	-19.8434	1.8041e-23	6.56486e-18	0.268524	0.0677276	LIHC
cg24559073	-0.339853	-31.7432	8.54111e-32	3.10799e-26	0.369126	0.0226891	LIHC
cg24597825	-0.309906	-36.9194	1.47496e-34	5.36717e-29	0.335747	0.0200474	LIHC
cg24627619	-0.27951	-38.7932	1.80899e-35	6.58264e-30	0.305539	0.0262551	LIHC
cg24627956	-0.293881	-18.385	3.5644e-22	1.29704e-16	0.330984	0.0257772	LIHC
cg24657313	-0.159069	-20.7969	2.81744e-24	1.02523e-18	0.17505	0.0138219	LIHC
cg24663206	-0.240631	-14.9727	8.32957e-19	3.03101e-13	0.33057	0.0744192	LIHC
cg24671250	-0.293884	-28.9949	3.73362e-30	1.35861e-24	0.410831	0.10956	LIHC
cg24691854	-0.200207	-11.062	3.02063e-14	1.09917e-08	0.370392	0.174614	LIHC
cg24701794	-0.249951	-34.633	2.19572e-33	7.98991e-28	0.278494	0.0240769	LIHC
cg24714634	-0.225025	-22.4447	1.33456e-25	4.85628e-20	0.255348	0.0314536	LIHC
cg24721916	-0.269612	-21.5535	6.77995e-25	2.46713e-19	0.298658	0.025408	LIHC
cg24735165	0.0838353	8.23578	1.96838e-10	7.16266e-05	0.724857	0.8123	LIHC
cg24740922	-0.393144	-41.3017	1.26021e-36	4.58574e-31	0.42293	0.0240269	LIHC
cg24741392	-0.24417	-16.5133	2.17195e-20	7.90342e-15	0.307208	0.0576522	LIHC
cg24748621	-0.358787	-59.1197	2.63257e-43	9.57957e-38	0.405547	0.0488887	LIHC
cg24765005	-0.194013	-18.6275	2.14301e-22	7.79813e-17	0.230178	0.0280487	LIHC
cg24783624	-0.241604	-17.5673	2.06071e-21	7.49863e-16	0.288749	0.0434135	LIHC
cg24814801	-0.184912	-25.4263	8.42315e-28	3.06507e-22	0.224717	0.0326047	LIHC
cg24816350	-0.179877	-16.505	2.21324e-20	8.05366e-15	0.217479	0.0308674	LIHC
cg24818939	-0.481398	-38.8354	1.72744e-35	6.28592e-30	0.553265	0.0815991	LIHC
cg24832428	-0.356027	-40.2656	3.71528e-36	1.35194e-30	0.370766	0.0163349	LIHC
cg24863802	-0.378073	-33.4428	9.57154e-33	3.48295e-27	0.455077	0.0706435	LIHC
cg24880787	-0.320284	-19.3896	4.47869e-23	1.62973e-17	0.395296	0.0718997	LIHC
cg24881209	0.0975311	7.51676	2.11314e-09	0.000768943	0.760395	0.841856	LIHC
cg24884420	-0.286448	-27.9621	1.68033e-29	6.11447e-24	0.335939	0.0480925	LIHC
cg24925526	-0.407024	-32.9998	1.67628e-32	6.09974e-27	0.458127	0.0456623	LIHC
cg24931094	-0.179541	-15.8635	9.80634e-20	3.56839e-14	0.210871	0.0254665	LIHC
cg24931882	-0.198739	-20.0293	1.24922e-23	4.54574e-18	0.260916	0.0517692	LIHC
cg24971873	-0.38476	-30.6668	3.61468e-31	1.31533e-25	0.426615	0.0346692	LIHC
cg24976080	-0.185696	-20.121	1.0429e-23	3.79497e-18	0.23189	0.0385135	LIHC
cg24980440	-0.0781589	-7.61752	1.51138e-09	0.00054997	0.122489	0.041363	LIHC
cg25073957	-0.299419	-24.0284	8.46249e-27	3.07938e-21	0.368294	0.0698212	LIHC
cg25080215	-0.165619	-21.9698	3.15122e-25	1.14669e-19	0.413635	0.248561	LIHC
cg25085925	-0.169313	-10.899	4.87809e-14	1.77507e-08	0.206263	0.0472417	LIHC
cg25122000	-0.217449	-17.3057	3.66002e-21	1.33183e-15	0.329488	0.103457	LIHC
cg25124605	-0.371624	-35.4319	8.39084e-34	3.05331e-28	0.403118	0.0286074	LIHC
cg25125864	-0.245623	-19.9521	1.45463e-23	5.29321e-18	0.420369	0.178007	LIHC
cg25132467	-0.445319	-15.9329	8.33052e-20	3.03136e-14	0.594583	0.14673	LIHC
cg25156485	-0.286381	-39.7398	6.49714e-36	2.36422e-30	0.340756	0.054972	LIHC
cg25158266	-0.285834	-25.9029	3.93393e-28	1.4315e-22	0.391193	0.093527	LIHC
cg25158628	-0.120946	-9.98584	7.62591e-13	2.77496e-07	0.165321	0.0402824	LIHC
cg25165659	-0.331314	-22.4931	1.22368e-25	4.45279e-20	0.397022	0.0584329	LIHC
cg25166062	-0.263395	-35.2994	9.82832e-34	3.57639e-28	0.287714	0.0192394	LIHC
cg25206026	-0.467065	-31.5176	1.15143e-31	4.18988e-26	0.52508	0.0497231	LIHC
cg25225807	-0.359	-33.4907	9.01278e-33	3.27963e-27	0.394962	0.0261938	LIHC
cg25236484	-0.325464	-20.9111	2.26605e-24	8.24583e-19	0.397934	0.0575553	LIHC
cg25237542	-0.303906	-22.0401	2.77232e-25	1.00881e-19	0.356018	0.0580608	LIHC
cg25258879	-0.176167	-6.72289	3.02642e-08	0.0110127	0.538885	0.340789	LIHC
cg25321762	-0.330926	-38.0244	4.22892e-35	1.53885e-29	0.379612	0.044838	LIHC
cg25364049	-0.336333	-24.4141	4.42629e-27	1.61066e-21	0.460067	0.123921	LIHC
cg25402895	-0.288869	-26.4699	1.61567e-28	5.87921e-23	0.412396	0.116446	LIHC
cg25415674	-0.344271	-20.3954	6.10463e-24	2.22139e-18	0.43328	0.0952275	LIHC
cg25427918	-0.39496	-34.7664	1.86721e-33	6.79452e-28	0.419673	0.0175584	LIHC
cg25442487	-0.240042	-35.7346	5.85845e-34	2.13181e-28	0.267305	0.0286183	LIHC
cg25452717	-0.309232	-21.4009	9.00531e-25	3.27691e-19	0.366669	0.0521952	LIHC
cg25496213	-0.298504	-22.8795	6.1583e-26	2.24092e-20	0.360005	0.0570689	LIHC
cg25499687	-0.291434	-19.8421	1.80884e-23	6.5821e-18	0.347082	0.0489137	LIHC
cg25528646	-0.417825	-34.3886	2.95939e-33	1.07688e-27	0.482741	0.0640788	LIHC
cg25530944	0.148712	6.59591	4.6438e-08	0.0168981	0.519806	0.642171	LIHC
cg25547663	-0.180308	-17.6098	1.87832e-21	6.83494e-16	0.235328	0.0494511	LIHC
cg25548414	-0.334988	-20.4955	5.02802e-24	1.82963e-18	0.445635	0.107242	LIHC
cg25553791	-0.296484	-23.1048	4.14512e-26	1.50835e-20	0.344126	0.0372371	LIHC
cg25553924	-0.238586	-21.3222	1.04316e-24	3.79591e-19	0.272696	0.0246458	LIHC
cg25558406	-0.20376	-18.2848	4.4048e-22	1.60284e-16	0.239676	0.0307468	LIHC
cg25571060	-0.285262	-23.887	1.07562e-26	3.91401e-21	0.321967	0.025662	LIHC
cg25587058	-0.324011	-23.4882	2.12962e-26	7.74939e-21	0.521458	0.199064	LIHC
cg25640635	-0.195325	-14.2934	4.5186e-18	1.64426e-12	0.3986	0.193812	LIHC
cg25656978	-0.444593	-28.5	7.63025e-30	2.77654e-24	0.491811	0.041593	LIHC
cg25698940	-0.336829	-35.7156	5.99169e-34	2.18029e-28	0.378556	0.0313928	LIHC
cg25714218	-0.320635	-27.3083	4.46883e-29	1.62614e-23	0.346481	0.0222113	LIHC
cg25736204	-0.221319	-25.6981	5.44819e-28	1.98252e-22	0.266865	0.0403498	LIHC
cg25790081	-0.349049	-30.6334	3.78298e-31	1.37658e-25	0.403131	0.048706	LIHC
cg25813447	-0.269359	-25.1707	1.27352e-27	4.63416e-22	0.328786	0.0662499	LIHC
cg25821416	0.050133	9.19748	8.90708e-12	3.24116e-06	0.911666	0.959676	LIHC
cg25837617	-0.315473	-37.1532	1.12914e-34	4.10879e-29	0.350402	0.0313196	LIHC
cg25848037	-0.322899	-18.6115	2.21613e-22	8.0642e-17	0.41527	0.0866798	LIHC
cg25858008	-0.349881	-31.7748	8.19259e-32	2.98117e-26	0.400356	0.0411678	LIHC
cg25870731	-0.327911	-32.8427	2.04837e-32	7.45373e-27	0.419836	0.0816811	LIHC
cg25873934	-0.142348	-7.60249	1.58879e-09	0.000578137	0.442995	0.29343	LIHC
cg25875683	-0.247341	-12.8779	1.82316e-16	6.63421e-11	0.423624	0.188549	LIHC
cg25888700	-0.506759	-35.259	1.03151e-33	3.75352e-28	0.543468	0.0416562	LIHC
cg25892640	-0.306313	-25.1051	1.41716e-27	5.15683e-22	0.35161	0.0423297	LIHC
cg25896944	-0.222664	-24.811	2.29328e-27	8.34491e-22	0.429075	0.200138	LIHC
cg25897349	-0.307157	-15.7855	1.17861e-19	4.28878e-14	0.459436	0.1431	LIHC
cg25905965	-0.171209	-16.9864	7.44535e-21	2.70926e-15	0.260275	0.0903299	LIHC
cg25908030	-0.194946	-11.7896	3.70469e-15	1.34808e-09	0.276346	0.0764233	LIHC
cg25911220	-0.253594	-25.8406	4.34268e-28	1.58024e-22	0.333764	0.0693522	LIHC
cg25940844	-0.414172	-28.7271	5.48937e-30	1.9975e-24	0.444555	0.0348169	LIHC
cg25941716	-0.246486	-20.3407	6.78857e-24	2.47027e-18	0.278156	0.0287855	LIHC
cg25947525	-0.0954198	-21.2523	1.18924e-24	4.32747e-19	0.138964	0.0461408	LIHC
cg25967516	-0.18823	-8.43543	1.02686e-10	3.73661e-05	0.316443	0.100283	LIHC
cg26001150	-0.269904	-17.7085	1.5154e-21	5.51431e-16	0.334067	0.0637169	LIHC
cg26009591	0.164219	7.35599	3.61257e-09	0.00131456	0.730591	0.873708	LIHC
cg26010110	-0.324705	-31.1625	1.84949e-31	6.73005e-26	0.41031	0.0860046	LIHC
cg26020914	-0.214994	-10.4734	1.73376e-13	6.30891e-08	0.257093	0.0353702	LIHC
cg26023405	-0.525554	-36.8851	1.53418e-34	5.58268e-29	0.54929	0.0272827	LIHC
cg26059639	-0.409561	-31.3137	1.51072e-31	5.4973e-26	0.494321	0.0804447	LIHC
cg26105341	-0.254479	-19.6305	2.7578e-23	1.00352e-17	0.321219	0.0692327	LIHC
cg26116400	-0.221058	-25.1808	1.25299e-27	4.55946e-22	0.315512	0.0914208	LIHC
cg26121752	-0.301959	-29.1941	2.80927e-30	1.02226e-24	0.356038	0.0512251	LIHC
cg26133460	-0.230697	-20.999	1.91762e-24	6.97794e-19	0.2583	0.0199641	LIHC
cg26146690	-0.37736	-28.923	4.13939e-30	1.50627e-24	0.473392	0.0943317	LIHC
cg26157279	-0.346438	-24.3942	4.57638e-27	1.66528e-21	0.396858	0.0403213	LIHC
cg26159385	-0.341692	-21.3891	9.20661e-25	3.35016e-19	0.406102	0.0634328	LIHC
cg26234774	-0.242049	-28.2354	1.12319e-29	4.08711e-24	0.358944	0.11773	LIHC
cg26246138	-0.3038	-24.0017	8.85413e-27	3.22189e-21	0.330286	0.022086	LIHC
cg26289980	-0.100445	-11.0392	3.22893e-14	1.17496e-08	0.186245	0.090118	LIHC
cg26308359	-0.322148	-15.2623	4.11648e-19	1.49793e-13	0.370012	0.0532866	LIHC
cg26316452	0.09287	7.32475	4.01003e-09	0.0014592	0.848793	0.92478	LIHC
cg26318441	-0.109463	-10.3325	2.65201e-13	9.65028e-08	0.148818	0.0359785	LIHC
cg26323797	-0.238335	-15.4278	2.76262e-19	1.00528e-13	0.305135	0.0646151	LIHC
cg26327984	0.214142	21.4088	8.87424e-25	3.22921e-19	0.746091	0.96035	LIHC
cg26332175	-0.255069	-15.6531	1.61277e-19	5.86866e-14	0.292969	0.0261814	LIHC
cg26333397	-0.389015	-21.1345	1.48428e-24	5.40108e-19	0.444651	0.0554462	LIHC
cg26340003	-0.187092	-17.9704	8.61036e-22	3.13319e-16	0.213481	0.0246059	LIHC
cg26342575	-0.359188	-38.6664	2.07867e-35	7.564e-30	0.401303	0.0311346	LIHC
cg26351354	0.0398345	7.83785	7.28225e-10	0.000264991	0.925662	0.95625	LIHC
cg26359238	-0.309833	-37.1009	1.19845e-34	4.361e-29	0.338602	0.0282467	LIHC
cg26359958	-0.285507	-27.2854	4.62612e-29	1.68338e-23	0.325251	0.0364289	LIHC
cg26363802	-0.290298	-22.8018	7.06406e-26	2.57051e-20	0.454473	0.16266	LIHC
cg26368752	-0.24166	-13.5257	3.25772e-17	1.18544e-11	0.280178	0.0313086	LIHC
cg26369916	-0.290368	-20.9693	2.02897e-24	7.38313e-19	0.50711	0.213932	LIHC
cg26376518	-0.23878	-22.0072	2.94359e-25	1.07113e-19	0.286648	0.0392963	LIHC
cg26380710	-0.38429	-39.167	1.20393e-35	4.38093e-30	0.437018	0.0563447	LIHC
cg26401825	-0.187148	-17.1808	4.82639e-21	1.75626e-15	0.266746	0.0820205	LIHC
cg26410404	-0.318262	-18.9607	1.07423e-22	3.90896e-17	0.370521	0.0460086	LIHC
cg26418790	-0.391696	-68.399	4.84737e-46	1.76389e-40	0.4173	0.0326608	LIHC
cg26421947	-0.280337	-24.844	2.17231e-27	7.90473e-22	0.391646	0.11052	LIHC
cg26439324	-0.404833	-21.9127	3.49813e-25	1.27292e-19	0.575489	0.17052	LIHC
cg26457165	-0.309462	-21.571	6.56291e-25	2.38815e-19	0.407276	0.0793804	LIHC
cg26492304	0.0963876	6.75676	2.69996e-08	0.00982476	0.812126	0.877107	LIHC
cg26505478	-0.466847	-33.3646	1.0562e-32	3.84335e-27	0.505549	0.0260637	LIHC
cg26518560	-0.176543	-23.7767	1.29807e-26	4.72351e-21	0.199788	0.0164205	LIHC
cg26540943	-0.294549	-28.6966	5.73664e-30	2.08748e-24	0.333034	0.0271157	LIHC
cg26545730	-0.163378	-11.6616	5.333e-15	1.9406e-09	0.249957	0.0784114	LIHC
cg26578373	-0.217246	-11.9737	2.20285e-15	8.01585e-10	0.276247	0.0531427	LIHC
cg26583344	-0.216028	-9.28301	6.79753e-12	2.47352e-06	0.286911	0.0897164	LIHC
cg26584339	-0.504611	-50.5466	2.23052e-40	8.11656e-35	0.545311	0.0397894	LIHC
cg26590811	-0.306728	-31.393	1.35903e-31	4.94531e-26	0.3479	0.0382912	LIHC
cg26620546	-0.252028	-23.2822	3.04214e-26	1.10699e-20	0.291176	0.0283065	LIHC
cg26680189	-0.381357	-44.9467	3.41339e-38	1.24208e-32	0.404336	0.0184336	LIHC
cg26682103	-0.427217	-51.96	6.82272e-41	2.48269e-35	0.472829	0.0423714	LIHC
cg26703319	-0.361391	-45.141	2.83876e-38	1.03299e-32	0.448475	0.0826693	LIHC
cg26744454	-0.317949	-44.5776	4.85568e-38	1.76692e-32	0.347664	0.0247592	LIHC
cg26745032	-0.34177	-34.8431	1.70166e-33	6.19211e-28	0.364036	0.0208826	LIHC
cg26746069	-0.399713	-35.5943	6.91738e-34	2.51714e-28	0.448461	0.042772	LIHC
cg26756979	-0.389095	-32.5439	3.00602e-32	1.09385e-26	0.43525	0.0388376	LIHC
cg26764180	-0.272413	-17.9112	9.77877e-22	3.55836e-16	0.314423	0.0249187	LIHC
cg26764972	-0.332187	-32.8858	1.93853e-32	7.05406e-27	0.386281	0.0443275	LIHC
cg26777746	-0.267156	-13.3704	4.89961e-17	1.7829e-11	0.330378	0.0626749	LIHC
cg26777760	-0.446481	-36.7165	1.86247e-34	6.77727e-29	0.516828	0.0691466	LIHC
cg26791257	-0.236217	-13.691	2.11617e-17	7.70046e-12	0.273894	0.0280589	LIHC
cg26793903	-0.114386	-8.72987	3.96255e-11	1.44192e-05	0.156132	0.0442429	LIHC
cg26799772	-0.362604	-31.4829	1.20565e-31	4.38719e-26	0.406298	0.0316715	LIHC
cg26802102	-0.225313	-21.2483	1.19827e-24	4.36034e-19	0.269918	0.027447	LIHC
cg26806511	-0.229335	-21.6283	5.90211e-25	2.1477e-19	0.33438	0.109499	LIHC
cg26811602	-0.323572	-22.6286	9.60673e-26	3.49576e-20	0.365308	0.031836	LIHC
cg26893124	-0.253728	-15.8741	9.56603e-20	3.48095e-14	0.336314	0.0801778	LIHC
cg26896756	-0.291469	-27.0834	6.28596e-29	2.28737e-23	0.31739	0.0204148	LIHC
cg26927606	-0.291865	-32.1399	5.07654e-32	1.84728e-26	0.32045	0.0207118	LIHC
cg26936230	-0.33335	-32.6362	2.66933e-32	9.71332e-27	0.399984	0.0638268	LIHC
cg26937310	-0.178451	-11.417	1.07576e-14	3.91453e-09	0.307283	0.12137	LIHC
cg26937423	-0.191679	-12.5217	4.80589e-16	1.7488e-10	0.243482	0.0331026	LIHC
cg26939525	-0.236649	-25.8491	4.28437e-28	1.55902e-22	0.275979	0.031837	LIHC
cg26950400	-0.299746	-22.2746	1.81216e-25	6.59419e-20	0.329413	0.0218274	LIHC
cg26951364	-0.230389	-22.1937	2.09744e-25	7.63227e-20	0.263028	0.0321345	LIHC
cg26968501	-0.176617	-12.3425	7.87335e-16	2.865e-10	0.244816	0.0679703	LIHC
cg27047283	-0.340981	-26.3182	2.04661e-28	7.44733e-23	0.389192	0.0381417	LIHC
cg27050343	-0.163466	-7.5189	2.09815e-09	0.000763488	0.435525	0.280595	LIHC
cg27054331	-0.137766	-6.97114	1.31223e-08	0.00477503	0.413268	0.28757	LIHC
cg27059259	-0.346075	-38.1664	3.61067e-35	1.31387e-29	0.38889	0.0345534	LIHC
cg27069132	-0.417203	-43.9886	8.57094e-38	3.11885e-32	0.443978	0.0165013	LIHC
cg27076487	-0.278219	-31.2618	1.61922e-31	5.89211e-26	0.322456	0.0407203	LIHC
cg27123903	-0.411088	-41.9371	6.57575e-37	2.39282e-31	0.441202	0.0205193	LIHC
cg27124847	-0.344251	-29.475	1.88639e-30	6.8643e-25	0.391662	0.0413561	LIHC
cg27166673	-0.237493	-12.4325	6.14091e-16	2.23459e-10	0.300744	0.0561562	LIHC
cg27207144	-0.357581	-48.0039	2.0415e-39	7.42872e-34	0.397984	0.0337561	LIHC
cg27251926	-0.128326	-15.912	8.74956e-20	3.18384e-14	0.257177	0.140884	LIHC
cg27260927	-0.3177	-27.2113	5.17537e-29	1.88325e-23	0.416984	0.106831	LIHC
cg27268405	-0.369241	-29.0912	3.25338e-30	1.18386e-24	0.4031	0.0216596	LIHC
cg27296089	-0.305861	-17.453	2.64626e-21	9.62937e-16	0.376939	0.0619699	LIHC
cg27296664	-0.199585	-9.75666	1.54594e-12	5.62547e-07	0.4688	0.275956	LIHC
cg27309655	-0.354548	-26.1278	2.75853e-28	1.00379e-22	0.432098	0.0726061	LIHC
cg27326620	-0.23594	-9.72425	1.70927e-12	6.21981e-07	0.467717	0.213282	LIHC
cg27327591	-0.31747	-43.0406	2.1724e-37	7.90507e-32	0.369174	0.0493589	LIHC
cg27350602	-0.293164	-18.1448	5.93072e-22	2.1581e-16	0.435054	0.144326	LIHC
cg27387615	-0.295265	-15.2926	3.82565e-19	1.3921e-13	0.514747	0.229139	LIHC
cg27388297	0.121629	11.7134	4.60133e-15	1.67436e-09	0.769205	0.876127	LIHC
cg27419028	-0.126574	-13.5137	3.36131e-17	1.22313e-11	0.154067	0.0281199	LIHC
cg27435491	-0.23769	-24.5229	3.69326e-27	1.34392e-21	0.271104	0.0295621	LIHC
cg27441045	-0.131185	-8.19919	2.21863e-10	8.07329e-05	0.44997	0.327901	LIHC
cg27452062	-0.0930358	-8.78166	3.3547e-11	1.22073e-05	0.157547	0.061069	LIHC
cg27470278	-0.28161	-23.8019	1.24343e-26	4.52466e-21	0.3091	0.0182931	LIHC
cg27471304	-0.277229	-21.7846	4.42407e-25	1.60986e-19	0.30859	0.0313366	LIHC
cg27474516	-0.321233	-33.8122	6.03003e-33	2.19424e-27	0.42571	0.105096	LIHC
cg27488875	-0.366726	-20.3837	6.24473e-24	2.27237e-18	0.494728	0.116765	LIHC
cg27496708	-0.271026	-31.5713	1.07226e-31	3.90181e-26	0.313593	0.0418341	LIHC
cg27501007	-0.439926	-34.1289	4.0725e-33	1.48192e-27	0.494991	0.0353652	LIHC
cg27501723	-0.432272	-39.6749	6.96402e-36	2.53411e-30	0.473589	0.0358561	LIHC
cg27545041	-0.19914	-17.2843	3.83733e-21	1.39635e-15	0.269654	0.0619229	LIHC
cg27558057	-0.448932	-18.5553	2.49256e-22	9.07006e-17	0.540216	0.079652	LIHC
cg27581839	-0.203155	-11.489	8.74384e-15	3.18176e-09	0.239421	0.036967	LIHC
cg27586390	-0.162611	-20.6843	3.49488e-24	1.27174e-18	0.180337	0.0153152	LIHC
cg27592925	-0.422801	-29.9728	9.39258e-31	3.41783e-25	0.493899	0.0710839	LIHC
cg27595778	-0.257058	-20.9404	2.14311e-24	7.79847e-19	0.294521	0.0239663	LIHC
cg27606669	-0.310969	-33.8764	5.56731e-33	2.02586e-27	0.443285	0.132322	LIHC
cg27609342	-0.357542	-21.541	6.93807e-25	2.52467e-19	0.433738	0.0676006	LIHC
cg27609596	-0.350917	-32.2094	4.63649e-32	1.68715e-26	0.43646	0.0793589	LIHC
cg27633753	-0.112595	-12.7756	2.40434e-16	8.74905e-11	0.152073	0.035042	LIHC
cg27637296	0.11464	9.80205	1.34332e-12	4.88815e-07	0.765211	0.865337	LIHC
cg23257934	-0.195426	-6.89235	1.71035e-08	0.00622371	0.760237	0.522666	LIHC
cg21585138	0.208695	6.40029	8.98646e-08	0.0327005	0.559379	0.776545	LIHC
cg13896204	-0.161876	-7.53395	1.99561e-09	0.000726176	0.788214	0.643602	LIHC
cg24755163	-0.223822	-7.67539	1.24718e-09	0.000453831	0.472504	0.195973	LIHC
cg00167275	-0.186063	-13.806	1.5708e-17	5.71591e-12	0.24094	0.0723003	LIHC
cg22152887	0.144617	7.23251	5.45974e-09	0.00198672	0.675449	0.822256	LIHC
cg08037478	-0.148011	-11.6796	5.06634e-15	1.84357e-09	0.549264	0.40515	LIHC
cg00804338	-0.0962017	-13.0647	1.10366e-16	4.01605e-11	0.131385	0.0345035	LIHC
cg23778841	-0.0386123	-9.28429	6.76996e-12	2.46349e-06	0.0726807	0.0360224	LIHC
cg07115626	0.147289	6.56518	5.15118e-08	0.0187444	0.364336	0.516772	LIHC
cg02537309	0.102286	7.95033	5.02398e-10	0.000182816	0.814682	0.926717	LIHC
cg25500196	0.110323	6.81257	2.23726e-08	0.00814109	0.537741	0.632567	LIHC
cg19651003	-0.175234	-6.93379	1.48779e-08	0.00541387	0.808743	0.619117	LIHC
cg04428163	0.124463	6.4349	7.99557e-08	0.0290947	0.424115	0.577555	LIHC
cg00005617	0.168684	11.5187	8.02679e-15	2.92084e-09	0.746101	0.894003	LIHC
cg00006815	-0.313617	-20.3829	6.25391e-24	2.27571e-18	0.354892	0.0438278	LIHC
cg00008932	0.21244	21.6244	5.94478e-25	2.16322e-19	0.723064	0.918116	LIHC
cg00023415	0.030618	7.35707	3.59956e-09	0.00130983	0.948103	0.970398	LIHC
cg00029931	-0.376478	-30.6657	3.62023e-31	1.31735e-25	0.399628	0.0168355	LIHC
cg00031235	0.0923301	7.09165	8.7546e-09	0.00318567	0.882124	0.968477	LIHC
cg00032666	0.120423	12.2354	1.0595e-15	3.85539e-10	0.811137	0.928492	LIHC
cg00040455	-0.257422	-14.4632	2.94599e-18	1.072e-12	0.363714	0.111881	LIHC
cg00046099	-0.511792	-60.8077	7.81571e-44	2.84403e-38	0.580793	0.0622806	LIHC
cg00098732	0.180316	9.63914	2.22665e-12	8.10249e-07	0.562017	0.740007	LIHC
cg00108056	-0.266101	-25.3843	9.01365e-28	3.27994e-22	0.296749	0.0311003	LIHC
cg00111239	-0.313555	-24.3812	4.67669e-27	1.70178e-21	0.367988	0.0384143	LIHC
cg00113623	-0.466979	-47.3904	3.54217e-39	1.28895e-33	0.520072	0.0557207	LIHC
cg00115511	-0.362593	-30.5873	4.02841e-31	1.46588e-25	0.393193	0.0274055	LIHC
cg00121904	-0.207478	-16.9516	8.05005e-21	2.9293e-15	0.252272	0.0373355	LIHC
cg00124708	0.142483	10.612	1.14444e-13	4.16447e-08	0.796241	0.916189	LIHC
cg00126698	0.138226	10.5614	1.33151e-13	4.84518e-08	0.744092	0.861149	LIHC
cg00128197	-0.296109	-32.6892	2.49358e-32	9.0738e-27	0.312729	0.0184304	LIHC
cg00130498	0.243651	9.95479	8.38902e-13	3.05265e-07	0.648285	0.867687	LIHC
cg00136787	0.0587431	7.04924	1.0094e-08	0.00367305	0.917718	0.970832	LIHC
cg00139547	-0.424024	-37.8192	5.31939e-35	1.93565e-29	0.459274	0.032683	LIHC
cg00140189	0.28002	25.3182	1.00288e-27	3.64933e-22	0.648873	0.927743	LIHC
cg00145348	-0.377166	-24.6872	2.81285e-27	1.02356e-21	0.399582	0.011859	LIHC
cg00150874	0.215736	21.3153	1.05684e-24	3.84568e-19	0.765703	0.969419	LIHC
cg00151234	-0.369499	-27.1881	5.36118e-29	1.95086e-23	0.394046	0.0172976	LIHC
cg00158454	-0.272783	-10.4961	1.61926e-13	5.89226e-08	0.453324	0.19807	LIHC
cg00168417	0.203084	14.2635	4.87364e-18	1.77345e-12	0.605777	0.793269	LIHC
cg00173270	0.221399	15.3942	2.99499e-19	1.08984e-13	0.677738	0.878604	LIHC
cg00179598	0.12506	17.3226	3.52596e-21	1.28305e-15	0.840852	0.959277	LIHC
cg00188257	0.21687	18.2328	4.91854e-22	1.78979e-16	0.733446	0.93561	LIHC
cg00188971	0.0544367	8.20615	2.1687e-10	7.89159e-05	0.915186	0.964941	LIHC
cg00191758	-0.425349	-34.7084	2.00338e-33	7.29001e-28	0.491215	0.0603617	LIHC
cg00191903	0.135425	11.7775	3.83491e-15	1.39547e-09	0.805179	0.917719	LIHC
cg00194585	0.138192	12.9007	1.71431e-16	6.23815e-11	0.803744	0.942547	LIHC
cg00195237	0.202192	12.1766	1.24783e-15	4.54069e-10	0.674451	0.863303	LIHC
cg00203804	0.0788968	6.57052	5.05912e-08	0.0184094	0.748924	0.824924	LIHC
cg00206332	0.147647	6.32874	1.14418e-07	0.041635	0.281086	0.451997	LIHC
cg00213853	-0.32644	-28.6906	5.78644e-30	2.1056e-24	0.371773	0.042997	LIHC
cg00213957	-0.413128	-26.701	1.12966e-28	4.11067e-23	0.477403	0.0472268	LIHC
cg00216997	-0.371473	-38.688	2.02991e-35	7.38657e-30	0.437958	0.0590216	LIHC
cg00228620	-0.144172	-6.76126	2.65936e-08	0.00967706	0.79705	0.654012	LIHC
cg00230685	-0.36564	-29.359	2.22253e-30	8.08749e-25	0.399156	0.024965	LIHC
cg00231549	-0.053702	-8.35757	1.32286e-10	4.8137e-05	0.0980517	0.0455735	LIHC
cg00238052	-0.278675	-13.3082	5.775e-17	2.10144e-11	0.419078	0.145746	LIHC
cg00238131	-0.171368	-10.5933	1.21013e-13	4.4035e-08	0.237565	0.056165	LIHC
cg00250879	0.221491	14.7613	1.40181e-18	5.10097e-13	0.62605	0.818572	LIHC
cg00253811	-0.36092	-33.3003	1.14531e-32	4.16761e-27	0.389035	0.0364575	LIHC
cg00256358	0.071082	6.86619	1.86773e-08	0.0067964	0.896381	0.954542	LIHC
cg00260448	-0.132314	-12.4349	6.10091e-16	2.22004e-10	0.165273	0.0240419	LIHC
cg00267883	0.123068	12.3305	8.1393e-16	2.96178e-10	0.82851	0.952593	LIHC
cg00271516	0.191061	23.9399	9.83099e-27	3.57736e-21	0.767259	0.953975	LIHC
cg00279797	-0.292198	-20.8953	2.33529e-24	8.49781e-19	0.363248	0.0600431	LIHC
cg00291164	0.108954	11.9335	2.4669e-15	8.97669e-10	0.81376	0.90258	LIHC
cg00321056	0.255715	26.0247	3.2445e-28	1.18063e-22	0.672912	0.913473	LIHC
cg00328965	-0.107426	-7.88063	6.32247e-10	0.000230066	0.814854	0.64906	LIHC
cg00348113	0.113778	8.80182	3.14443e-11	1.14421e-05	0.835477	0.923538	LIHC
cg00360298	0.186108	16.5279	2.10072e-20	7.64423e-15	0.712608	0.892825	LIHC
cg00368230	-0.270646	-12.3924	6.85829e-16	2.49564e-10	0.2976	0.0324227	LIHC
cg00369058	0.310708	22.2293	1.96674e-25	7.1567e-20	0.578367	0.877117	LIHC
cg00369477	-0.140992	-10.0253	6.75672e-13	2.45868e-07	0.3291	0.160438	LIHC
cg00374346	0.143163	15.2359	4.38788e-19	1.59669e-13	0.825003	0.953717	LIHC
cg00375105	-0.251224	-16.8966	9.10664e-21	3.31378e-15	0.27158	0.0180117	LIHC
cg00379371	-0.121621	-10.2836	3.07504e-13	1.11896e-07	0.159539	0.02459	LIHC
cg00379983	0.165083	11.3265	1.39759e-14	5.08565e-09	0.753725	0.917726	LIHC
cg00382651	-0.181344	-18.2656	4.58779e-22	1.66943e-16	0.224004	0.0388492	LIHC
cg00387940	0.193765	10.8424	5.76628e-14	2.09827e-08	0.669373	0.828705	LIHC
cg00389276	0.257294	18.9054	1.20393e-22	4.38094e-17	0.664233	0.913157	LIHC
cg00389552	0.394078	17.221	4.41456e-21	1.6064e-15	0.435498	0.803153	LIHC
cg00391379	0.191355	12.3138	8.52288e-16	3.10136e-10	0.757033	0.929897	LIHC
cg00400665	0.149149	6.38132	9.5807e-08	0.0348628	0.544455	0.693256	LIHC
cg00403724	0.301885	16.3575	3.10511e-20	1.1299e-14	0.57087	0.868105	LIHC
cg00409480	0.223114	12.8874	1.77732e-16	6.4674e-11	0.701056	0.907602	LIHC
cg00411843	-0.159179	-8.81004	3.06248e-11	1.11439e-05	0.277333	0.126801	LIHC
cg00422452	0.135326	8.38858	1.19582e-10	4.35143e-05	0.777822	0.89173	LIHC
cg00426668	0.319791	20.3096	7.21335e-24	2.62484e-18	0.34842	0.667851	LIHC
cg00428012	-0.380946	-26.7733	1.01051e-28	3.67712e-23	0.435499	0.054892	LIHC
cg00428314	-0.45967	-52.9487	3.03454e-41	1.10423e-35	0.51492	0.0493363	LIHC
cg00433220	-0.463539	-33.8022	6.10504e-33	2.22154e-27	0.524579	0.0555041	LIHC
cg00451631	-0.190011	-8.97003	1.83527e-11	6.6783e-06	0.400748	0.211094	LIHC
cg00473051	0.171139	8.6881	4.53313e-11	1.64954e-05	0.214334	0.367862	LIHC
cg00481999	-0.303485	-20.5652	4.39512e-24	1.59932e-18	0.344042	0.0282377	LIHC
cg00484940	-0.243955	-12.1616	1.30139e-15	4.73557e-10	0.487843	0.237213	LIHC
cg00491350	0.122555	6.89985	1.66776e-08	0.00606874	0.825769	0.932895	LIHC
cg00510327	0.101667	8.50658	8.15105e-11	2.96605e-05	0.845521	0.934266	LIHC
cg00525383	-0.229822	-12.6521	3.36445e-16	1.22428e-10	0.524029	0.297727	LIHC
cg00547789	-0.271973	-13.0574	1.12543e-16	4.09529e-11	0.378187	0.0805466	LIHC
cg00553200	-0.107154	-7.19306	6.23086e-09	0.00226732	0.174151	0.070148	LIHC
cg00577623	0.178223	13.9611	1.05337e-17	3.83305e-12	0.765807	0.938557	LIHC
cg00581583	-0.327088	-38.0642	4.04562e-35	1.47214e-29	0.363599	0.0370756	LIHC
cg00582864	0.116389	14.6586	1.80884e-18	6.58212e-13	0.8499	0.958686	LIHC
cg00583858	0.246792	15.25	4.2399e-19	1.54284e-13	0.551848	0.782536	LIHC
cg00584971	-0.280674	-18.9674	1.05966e-22	3.85595e-17	0.357904	0.0773005	LIHC
cg00600110	0.107988	7.65022	1.35582e-09	0.000493366	0.728688	0.810988	LIHC
cg00604086	-0.407805	-45.9495	1.32851e-38	4.83424e-33	0.444229	0.0390024	LIHC
cg00607036	-0.347695	-38.3583	2.91878e-35	1.0621e-29	0.400758	0.0539483	LIHC
cg00614938	0.0975287	6.30842	1.22542e-07	0.0445912	0.72815	0.816148	LIHC
cg00618396	-0.389455	-38.6811	2.04542e-35	7.44301e-30	0.412453	0.0234393	LIHC
cg00620602	0.042168	6.37985	9.62827e-08	0.0350359	0.920743	0.949544	LIHC
cg00623388	-0.43747	-44.8069	3.89971e-38	1.41905e-32	0.470011	0.0225458	LIHC
cg00627024	-0.205078	-18.2715	4.53124e-22	1.64886e-16	0.233265	0.0263378	LIHC
cg00632374	-0.461288	-32.7909	2.18858e-32	7.96395e-27	0.576883	0.0820736	LIHC
cg00634642	-0.372712	-28.2976	1.02526e-29	3.73077e-24	0.415896	0.0352042	LIHC
cg00641092	-0.264543	-14.3837	3.59776e-18	1.30918e-12	0.403682	0.129079	LIHC
cg00667781	-0.348159	-38.9436	1.53487e-35	5.58518e-30	0.377578	0.0335524	LIHC
cg00673685	0.285447	12.4385	6.04083e-16	2.19817e-10	0.527304	0.766941	LIHC
cg00690049	-0.188428	-10.1871	4.1224e-13	1.50008e-07	0.507736	0.27469	LIHC
cg00705055	0.0649064	8.12365	2.84167e-10	0.000103404	0.871703	0.93101	LIHC
cg00715011	-0.208848	-12.7831	2.35632e-16	8.57431e-11	0.258769	0.034671	LIHC
cg00718129	0.157256	12.3892	6.92087e-16	2.51841e-10	0.644583	0.805592	LIHC
cg00722467	0.0429861	9.64258	2.20294e-12	8.01618e-07	0.936394	0.97271	LIHC
cg00723034	-0.282832	-25.9221	3.8162e-28	1.38866e-22	0.3027	0.0115498	LIHC
cg00725912	-0.219537	-17.8725	1.06284e-21	3.86753e-16	0.24048	0.0268595	LIHC
cg00735876	0.154117	9.61865	2.37339e-12	8.63642e-07	0.746761	0.901302	LIHC
cg00735885	0.269134	19.7647	2.1095e-23	7.67618e-18	0.634829	0.87979	LIHC
cg00738702	0.102188	13.818	1.5227e-17	5.54089e-12	0.873961	0.971007	LIHC
cg00739787	-0.332455	-19.9018	1.60689e-23	5.84726e-18	0.391295	0.0471804	LIHC
cg00741717	0.129693	11.5191	8.018e-15	2.91764e-09	0.815099	0.932626	LIHC
cg00742240	0.158591	15.4402	2.68147e-19	9.75749e-14	0.788562	0.947747	LIHC
cg00743068	-0.306216	-25.5015	7.46291e-28	2.71565e-22	0.349558	0.0373656	LIHC
cg00762681	0.228244	9.69675	1.86158e-12	6.77402e-07	0.625079	0.836356	LIHC
cg00763315	0.167492	16.9865	7.44431e-21	2.70888e-15	0.786627	0.952016	LIHC
cg00765686	0.158722	6.75709	2.697e-08	0.009814	0.556388	0.706742	LIHC
cg00765885	-0.393058	-21.8992	3.58525e-25	1.30462e-19	0.561436	0.166229	LIHC
cg00775115	-0.384538	-27.3271	4.34366e-29	1.5806e-23	0.467486	0.0739702	LIHC
cg00779763	-0.522649	-41.7179	8.22103e-37	2.99152e-31	0.619892	0.0905789	LIHC
cg00780578	0.237514	16.0558	6.24821e-20	2.27363e-14	0.688112	0.904277	LIHC
cg00781047	-0.0843722	-6.30625	1.23443e-07	0.044919	0.487494	0.416085	LIHC
cg00781978	-0.0885647	-6.80949	2.26057e-08	0.00822589	0.121349	0.0233707	LIHC
cg00787015	-0.130651	-7.27658	4.71095e-09	0.00171425	0.203654	0.068752	LIHC
cg00790086	-0.342967	-33.7567	6.46134e-33	2.35119e-27	0.369576	0.0214482	LIHC
cg00799224	-0.276177	-26.0107	3.317e-28	1.20701e-22	0.306916	0.0407881	LIHC
cg00803922	0.0608053	9.15555	1.01721e-11	3.7015e-06	0.916134	0.972106	LIHC
cg00804510	0.0530315	9.44497	4.08413e-12	1.48616e-06	0.915872	0.964783	LIHC
cg00805116	-0.306527	-20.926	2.20259e-24	8.01493e-19	0.345177	0.0343595	LIHC
cg00809111	-0.15451	-9.61202	2.42288e-12	8.81653e-07	0.332729	0.179121	LIHC
cg00810883	-0.168552	-7.80004	8.25213e-10	0.000300284	0.311085	0.148798	LIHC
cg00813142	-0.339022	-28.0578	1.45858e-29	5.30756e-24	0.395062	0.0504404	LIHC
cg00815013	-0.165579	-8.85397	2.66005e-11	9.67955e-06	0.230841	0.0772615	LIHC
cg00816548	-0.362064	-27.5697	3.01487e-29	1.09707e-23	0.427892	0.0622104	LIHC
cg00819012	0.0727669	6.7674	2.60489e-08	0.00947884	0.872797	0.926758	LIHC
cg00822942	0.126522	8.36342	1.29787e-10	4.72278e-05	0.801084	0.938017	LIHC
cg00823357	-0.35659	-33.2818	1.1724e-32	4.26622e-27	0.39949	0.0448981	LIHC
cg00825441	-0.16389	-6.83487	2.07541e-08	0.00755212	0.549019	0.362058	LIHC
cg00829575	-0.421731	-30.5336	4.33497e-31	1.57744e-25	0.476472	0.041032	LIHC
cg00832136	-0.126475	-10.4432	1.89872e-13	6.90919e-08	0.175208	0.0460362	LIHC
cg00834229	-0.328043	-19.3021	5.34688e-23	1.94566e-17	0.37772	0.0351456	LIHC
cg00839869	0.178327	18.8789	1.27178e-22	4.62782e-17	0.75829	0.929445	LIHC
cg00850648	-0.311915	-19.7144	2.33239e-23	8.48723e-18	0.397865	0.0895402	LIHC
cg00854963	-0.156268	-11.4249	1.05147e-14	3.82616e-09	0.384398	0.23679	LIHC
cg00861899	0.154456	10.5618	1.3296e-13	4.83822e-08	0.690821	0.826547	LIHC
cg00874863	0.213319	12.9013	1.71158e-16	6.2282e-11	0.71971	0.920678	LIHC
cg00877056	-0.122169	-9.78036	1.43656e-12	5.22745e-07	0.184411	0.067464	LIHC
cg00878023	-0.542821	-48.0029	2.0433e-39	7.4353e-34	0.591971	0.0496123	LIHC
cg00881557	-0.215197	-12.6827	3.09476e-16	1.12614e-10	0.263578	0.0485622	LIHC
cg00898159	0.0452114	7.12938	7.71356e-09	0.00280686	0.921672	0.957414	LIHC
cg00901211	-0.304537	-28.2946	1.0298e-29	3.74731e-24	0.35504	0.0458173	LIHC
cg00902308	-0.161093	-11.504	8.37442e-15	3.04733e-09	0.230704	0.0638356	LIHC
cg00908601	0.135055	7.31203	4.18431e-09	0.00152261	0.458334	0.531617	LIHC
cg00909388	0.150754	16.2687	3.81146e-20	1.38694e-14	0.776996	0.930131	LIHC
cg00913945	0.0822878	7.24401	5.25352e-09	0.00191168	0.80193	0.870327	LIHC
cg00914218	-0.420521	-44.4752	5.3574e-38	1.94948e-32	0.468502	0.0404448	LIHC
cg00917018	-0.456937	-25.7958	4.66276e-28	1.69671e-22	0.542602	0.0701695	LIHC
cg00920314	0.296329	11.2202	1.90301e-14	6.92478e-09	0.517175	0.788711	LIHC
cg00920537	-0.260339	-22.8949	5.99298e-26	2.18076e-20	0.290949	0.0349415	LIHC
cg00920960	-0.295585	-29.5802	1.6265e-30	5.91859e-25	0.333154	0.0317044	LIHC
cg00926894	-0.248923	-12.5334	4.65453e-16	1.69372e-10	0.476555	0.242901	LIHC
cg00932276	-0.199989	-11.3561	1.28276e-14	4.66778e-09	0.288732	0.0852676	LIHC
cg00934057	0.100131	10.5729	1.28627e-13	4.68055e-08	0.837149	0.933223	LIHC
cg00935394	-0.265476	-21.848	3.93841e-25	1.43313e-19	0.308589	0.0346723	LIHC
cg00936342	-0.328941	-27.3108	4.45183e-29	1.61996e-23	0.354819	0.0165894	LIHC
cg00936349	0.220434	16.2425	4.0491e-20	1.47341e-14	0.673316	0.888141	LIHC
cg00937263	-0.334905	-15.8634	9.80872e-20	3.56926e-14	0.423406	0.0964231	LIHC
cg00940232	-0.316696	-24.1553	6.83154e-27	2.4859e-21	0.378399	0.0621758	LIHC
cg00947275	-0.165328	-12.8002	2.24969e-16	8.18631e-11	0.191068	0.0218557	LIHC
cg00960300	0.2031	11.8303	3.30161e-15	1.20141e-09	0.610209	0.799998	LIHC
cg00960898	-0.349655	-16.144	5.08889e-20	1.85177e-14	0.519653	0.177517	LIHC
cg00963467	-0.486215	-49.7312	4.48291e-40	1.63127e-34	0.520517	0.024309	LIHC
cg00965330	0.22845	13.4942	3.5379e-17	1.28739e-11	0.685162	0.902167	LIHC
cg00966524	0.196372	11.3778	1.20488e-14	4.38437e-09	0.745241	0.938195	LIHC
cg00968475	-0.231038	-14.0868	7.63685e-18	2.77894e-12	0.348109	0.106981	LIHC
cg00969573	-0.271368	-21.6923	5.2441e-25	1.90825e-19	0.319691	0.0437273	LIHC
cg00981643	-0.25536	-15.1129	5.9143e-19	2.15213e-13	0.379254	0.116973	LIHC
cg00994038	-0.313312	-23.4958	2.10181e-26	7.6482e-21	0.464411	0.146645	LIHC
cg01001959	-0.277134	-13.5731	2.8772e-17	1.04697e-11	0.364708	0.0731312	LIHC
cg01004805	-0.111418	-8.40377	1.13816e-10	4.14161e-05	0.195902	0.0795402	LIHC
cg01005760	0.132112	12.0142	1.96564e-15	7.15268e-10	0.815633	0.932261	LIHC
cg01010618	-0.286947	-27.2755	4.69557e-29	1.70865e-23	0.333838	0.0495563	LIHC
cg01019600	-0.370244	-18.2302	4.94547e-22	1.79959e-16	0.463882	0.0875148	LIHC
cg01024350	0.16992	14.8744	1.06041e-18	3.85868e-13	0.771997	0.936456	LIHC
cg01037726	0.24357	20.5851	4.22957e-24	1.53908e-18	0.639851	0.847629	LIHC
cg01039990	-0.32104	-12.1386	1.38762e-15	5.04937e-10	0.495368	0.210393	LIHC
cg01043588	-0.266498	-9.89937	9.94836e-13	3.62007e-07	0.597456	0.279725	LIHC
cg01044189	0.0985619	7.11733	8.03175e-09	0.00292264	0.831158	0.920752	LIHC
cg01046746	-0.313834	-20.983	1.97692e-24	7.19375e-19	0.506396	0.184278	LIHC
cg01057599	-0.227473	-14.997	7.84808e-19	2.85581e-13	0.273092	0.0373906	LIHC
cg01076406	0.166791	12.0808	1.63073e-15	5.93401e-10	0.752391	0.908912	LIHC
cg01078706	-0.369821	-24.9309	1.88364e-27	6.85431e-22	0.466738	0.0899152	LIHC
cg01079126	-0.303792	-24.8948	1.99827e-27	7.27143e-22	0.328489	0.0175968	LIHC
cg01080862	-0.429015	-32.9939	1.68892e-32	6.14573e-27	0.489486	0.0402823	LIHC
cg01081720	-0.178458	-13.4696	3.77334e-17	1.37307e-11	0.276513	0.105975	LIHC
cg01084328	0.151372	12.9676	1.43203e-16	5.21094e-11	0.768846	0.914292	LIHC
cg01086868	-0.429001	-32.6276	2.69885e-32	9.82074e-27	0.484608	0.0455755	LIHC
cg01087775	-0.217432	-9.50702	3.36273e-12	1.22365e-06	0.643971	0.367827	LIHC
cg01098871	-0.353164	-26.9485	7.72335e-29	2.81042e-23	0.387971	0.0293846	LIHC
cg01099541	-0.281698	-24.3936	4.58072e-27	1.66686e-21	0.328834	0.039412	LIHC
cg01108554	-0.360655	-25.9026	3.936e-28	1.43226e-22	0.390201	0.0271293	LIHC
cg01109660	0.336968	35.944	4.57689e-34	1.66547e-28	0.535205	0.846761	LIHC
cg01110765	0.237432	13.9175	1.17838e-17	4.28797e-12	0.671828	0.900913	LIHC
cg01112452	-0.259039	-16.4459	2.53422e-20	9.22167e-15	0.588618	0.345296	LIHC
cg01119763	-0.169024	-11.8689	2.96011e-15	1.07714e-09	0.221009	0.0514171	LIHC
cg01121830	-0.376556	-37.2816	9.75593e-35	3.55005e-29	0.432648	0.0581259	LIHC
cg01123965	0.407206	32.7186	2.40118e-32	8.73757e-27	0.489267	0.896095	LIHC
cg01125381	-0.174153	-11.7447	4.20938e-15	1.53173e-09	0.293159	0.11474	LIHC
cg01132485	0.135711	12.2221	1.09943e-15	4.00066e-10	0.740661	0.853152	LIHC
cg01134497	0.216914	13.6339	2.45557e-17	8.93549e-12	0.741032	0.936566	LIHC
cg01138740	0.159334	7.43135	2.80907e-09	0.00102218	0.744939	0.888943	LIHC
cg01145939	0.160185	15.1931	4.86734e-19	1.77116e-13	0.788351	0.948409	LIHC
cg01162900	0.101611	10.6474	1.02934e-13	3.74564e-08	0.857954	0.951258	LIHC
cg01169440	-0.223846	-19.3696	4.66364e-23	1.69703e-17	0.249122	0.0155354	LIHC
cg01172484	-0.293445	-23.5566	1.8927e-26	6.88727e-21	0.316953	0.0196581	LIHC
cg01173474	-0.313012	-19.6058	2.89776e-23	1.05446e-17	0.445434	0.131873	LIHC
cg01173508	0.165182	12.6141	3.73193e-16	1.358e-10	0.742086	0.906585	LIHC
cg01178063	0.211802	10.7285	8.08476e-14	2.94193e-08	0.642723	0.813067	LIHC
cg01186310	0.0444161	6.95961	1.36409e-08	0.00496373	0.924336	0.964782	LIHC
cg01203948	-0.148415	-9.74924	1.58188e-12	5.75626e-07	0.544592	0.369695	LIHC
cg01210880	-0.293596	-21.8744	3.75196e-25	1.36529e-19	0.349182	0.04716	LIHC
cg01212677	-0.426284	-41.8896	6.90153e-37	2.51137e-31	0.472152	0.0398514	LIHC
cg01222180	-0.282051	-13.8956	1.24665e-17	4.53638e-12	0.582349	0.293403	LIHC
cg01225298	-0.338546	-22.9039	5.89918e-26	2.14663e-20	0.408625	0.0521183	LIHC
cg01228667	-0.262534	-24.0186	8.60475e-27	3.13115e-21	0.278943	0.0190863	LIHC
cg01231576	0.177149	12.5224	4.79695e-16	1.74554e-10	0.652587	0.822649	LIHC
cg01241836	-0.309275	-25.9206	3.82489e-28	1.39182e-22	0.358552	0.0428739	LIHC
cg01245531	-0.252689	-26.2152	2.4048e-28	8.75075e-23	0.29045	0.0408678	LIHC
cg01257202	-0.207452	-15.0717	6.54017e-19	2.37988e-13	0.270827	0.0604138	LIHC
cg01283227	0.278904	16.9881	7.41671e-21	2.69884e-15	0.547162	0.827004	LIHC
cg01286388	-0.336039	-28.1421	1.28817e-29	4.68749e-24	0.385898	0.0385396	LIHC
cg01288367	-0.359741	-39.1552	1.21944e-35	4.43737e-30	0.401679	0.0405692	LIHC
cg01293271	-0.276384	-13.4842	3.63144e-17	1.32143e-11	0.414763	0.158879	LIHC
cg01306265	-0.33621	-17.5633	2.07893e-21	7.56495e-16	0.444421	0.0950612	LIHC
cg01308913	-0.246922	-11.0655	2.98939e-14	1.0878e-08	0.397013	0.157243	LIHC
cg01309671	-0.271524	-24.66	2.9423e-27	1.07066e-21	0.347938	0.0681177	LIHC
cg01314643	-0.281976	-20.8268	2.66096e-24	9.68287e-19	0.321974	0.0265451	LIHC
cg01316390	0.28414	15.8845	9.3338e-20	3.39644e-14	0.405201	0.685576	LIHC
cg01319581	0.103358	14.5371	2.44872e-18	8.91055e-13	0.867693	0.957178	LIHC
cg01321830	-0.142596	-9.96575	8.11118e-13	2.95154e-07	0.211837	0.0873123	LIHC
cg01337545	-0.0796141	-7.21753	5.74054e-09	0.0020889	0.121506	0.0688753	LIHC
cg01342901	-0.545007	-43.9479	8.91692e-38	3.24474e-32	0.590531	0.0383295	LIHC
cg01343084	-0.272364	-19.2278	6.21805e-23	2.26266e-17	0.341428	0.0769109	LIHC
cg01345087	-0.423302	-43.7593	1.07147e-37	3.89892e-32	0.440018	0.0146643	LIHC
cg01348758	-0.21834	-16.3234	3.35864e-20	1.22216e-14	0.241405	0.0308041	LIHC
cg01348942	0.0816555	7.85137	6.96398e-10	0.00025341	0.876567	0.946684	LIHC
cg01349336	-0.120747	-6.44164	7.81568e-08	0.0284402	0.501295	0.409798	LIHC
cg01353347	-0.356161	-25.7974	4.65107e-28	1.69246e-22	0.386143	0.025019	LIHC
cg01354447	0.144329	8.98162	1.7686e-11	6.43569e-06	0.719329	0.84387	LIHC
cg01361446	0.193846	9.71598	1.75373e-12	6.38157e-07	0.573534	0.721335	LIHC
cg01364253	0.179088	6.95604	1.38058e-08	0.00502373	0.533196	0.691336	LIHC
cg01364907	0.270321	17.4909	2.43534e-21	8.86187e-16	0.646815	0.889681	LIHC
cg01372422	0.124103	6.79936	2.339e-08	0.0085113	0.545047	0.665027	LIHC
cg01372992	-0.238645	-21.1886	1.34057e-24	4.87816e-19	0.276854	0.0375259	LIHC
cg01381545	-0.16116	-8.6687	4.82568e-11	1.756e-05	0.261019	0.0857518	LIHC
cg01383228	-0.160413	-8.3686	1.27619e-10	4.64387e-05	0.240492	0.0969509	LIHC
cg01383599	0.252665	31.8275	7.6434e-32	2.78133e-26	0.698303	0.953645	LIHC
cg01384686	-0.476906	-52.3523	4.93823e-41	1.79695e-35	0.503849	0.0286562	LIHC
cg01386236	-0.462857	-37.6202	6.65174e-35	2.42047e-29	0.49419	0.031067	LIHC
cg01398148	0.130073	11.9513	2.34615e-15	8.5373e-10	0.837469	0.961452	LIHC
cg01398912	-0.390776	-35.9181	4.7187e-34	1.71707e-28	0.497894	0.10609	LIHC
cg01408383	-0.269239	-47.5456	3.0793e-39	1.12051e-33	0.276157	0.00931898	LIHC
cg01410230	-0.302482	-22.971	5.24163e-26	1.90736e-20	0.347837	0.0434796	LIHC
cg01415112	-0.265687	-27.6314	2.7486e-29	1.00018e-23	0.318161	0.053876	LIHC
cg01430241	-0.472002	-46.9677	5.1992e-39	1.89192e-33	0.510745	0.0245807	LIHC
cg01436914	-0.266309	-21.1062	1.56583e-24	5.69782e-19	0.305497	0.03687	LIHC
cg01445307	-0.393785	-36.482	2.44223e-34	8.88695e-29	0.420047	0.0239651	LIHC
cg01460974	-0.218682	-14.812	1.23681e-18	4.50058e-13	0.322649	0.0989044	LIHC
cg01461762	-0.409842	-43.4042	1.51725e-37	5.52106e-32	0.442976	0.0217314	LIHC
cg01462040	-0.319339	-38.2221	3.39402e-35	1.23504e-29	0.343824	0.0203477	LIHC
cg01465073	-0.16167	-10.5044	1.57964e-13	5.74809e-08	0.281954	0.136133	LIHC
cg01466335	0.183196	14.1794	6.03218e-18	2.19502e-12	0.706297	0.902749	LIHC
cg01467249	0.103244	7.43646	2.76155e-09	0.00100489	0.840477	0.931106	LIHC
cg01473187	-0.142689	-9.73075	1.67519e-12	6.09577e-07	0.514399	0.391618	LIHC
cg01473525	0.221806	11.2983	1.51666e-14	5.51891e-09	0.583089	0.814958	LIHC
cg01479413	-0.368293	-28.9108	4.21284e-30	1.53299e-24	0.389249	0.0295639	LIHC
cg01486020	-0.337134	-26.604	1.31226e-28	4.77514e-23	0.379597	0.0531685	LIHC
cg01488378	-0.327115	-21.3421	1.0051e-24	3.65741e-19	0.359649	0.0265356	LIHC
cg01490258	0.253564	10.7816	6.90561e-14	2.51285e-08	0.388317	0.609689	LIHC
cg01498090	0.112552	6.61584	4.34195e-08	0.0157997	0.589263	0.670155	LIHC
cg01522335	0.147816	7.0756	9.23912e-09	0.00336199	0.571381	0.712657	LIHC
cg01523865	-0.144724	-6.77451	2.54322e-08	0.00925444	0.401466	0.265902	LIHC
cg01528835	0.147448	19.111	7.89265e-23	2.87203e-17	0.824746	0.969187	LIHC
cg01537968	-0.331887	-23.2549	3.19047e-26	1.16097e-20	0.368168	0.0347672	LIHC
cg01540386	-0.146721	-9.42468	4.35243e-12	1.58379e-06	0.176803	0.0291168	LIHC
cg01545419	0.0470287	6.66558	3.67138e-08	0.0133596	0.89717	0.933422	LIHC
cg01556010	-0.457407	-38.9501	1.52418e-35	5.54626e-30	0.511627	0.0521678	LIHC
cg01562833	-0.339302	-19.6321	2.74897e-23	1.00031e-17	0.474173	0.137542	LIHC
cg01564045	0.110998	6.8221	2.16659e-08	0.00788392	0.856356	0.950146	LIHC
cg01567000	-0.26378	-23.7458	1.36839e-26	4.97939e-21	0.292701	0.0293112	LIHC
cg01568488	0.176829	17.9419	9.15473e-22	3.33128e-16	0.744181	0.902105	LIHC
cg01575816	-0.310635	-18.8003	1.49632e-22	5.44488e-17	0.362961	0.0423708	LIHC
cg01579322	-0.426114	-37.3624	8.90177e-35	3.23923e-29	0.462992	0.0374679	LIHC
cg01581349	0.154531	16.2513	3.96728e-20	1.44364e-14	0.823939	0.966784	LIHC
cg01589255	-0.321324	-32.7301	2.36604e-32	8.60969e-27	0.361115	0.0336468	LIHC
cg01592490	0.115564	8.12707	2.80998e-10	0.000102251	0.842461	0.937094	LIHC
cg01593269	-0.227	-11.2361	1.81664e-14	6.6105e-09	0.447291	0.233573	LIHC
cg01596349	-0.393575	-24.596	3.27126e-27	1.19037e-21	0.51909	0.120016	LIHC
cg01597947	0.250356	13.8695	1.33327e-17	4.85157e-12	0.610147	0.840189	LIHC
cg01609611	-0.132179	-9.72187	1.72196e-12	6.26597e-07	0.220886	0.0835738	LIHC
cg01634761	-0.206025	-12.9741	1.40723e-16	5.1207e-11	0.419924	0.215392	LIHC
cg01651728	0.140564	7.09571	8.63614e-09	0.00314257	0.705773	0.81791	LIHC
cg01663055	0.0857421	8.57406	6.55099e-11	2.38381e-05	0.88154	0.970455	LIHC
cg01669374	-0.306938	-30.6053	3.93096e-31	1.43042e-25	0.34465	0.0452729	LIHC
cg01673753	0.291051	27.5578	3.06886e-29	1.11671e-23	0.650688	0.927031	LIHC
cg01674874	0.289158	25.5916	6.45908e-28	2.35037e-22	0.652958	0.925733	LIHC
cg01683788	-0.40228	-35.7197	5.96273e-34	2.16975e-28	0.45162	0.0331524	LIHC
cg01716666	-0.410418	-27.1831	5.40158e-29	1.96556e-23	0.445834	0.0189939	LIHC
[truncated: 47,241 more rows]
