# Supplementary material for: Attenuated sex-related DNA methylation differences in cancer highlight the magnitude bias mediating existing disparities
Source: Biol Sex Differ. 2024 Dec 23;15:106. doi: 10.1186/s13293-024-00682-4 (PMC11664931; doi:10.1186/s13293-024-00682-4)
Supplement: Supplementary file 4 — Supplementary material 4. [file 13293_2024_682_MOESM4_ESM.xlsx]

## Sheet: AMPs
AMP	Cancer	Direction	meanDiff.NAT	tstat.NAT	pval.NAT	bonf.NAT	meanDiff.Tumor	bonf.Tumor	CHR	MAPINFO	gene	feat.cgi
cg13781574	LIHC	female-bias	-0.364283	-23.4451	2.29403e-26	8.34766e-21	0.00119867	1	X	69675294	DLG3	Body-island
cg19937286	LIHC	male-bias	0.289343	22.0221	2.86444e-25	1.04233e-19	-0.132488	1	X	40017092	BCOR	5'UTR-shore
cg17531456	LIHC	female-bias	-0.24895	-21.868	3.79655e-25	1.38151e-19	-0.102796	1	X	134124939	LOC644538	TSS200-island
cg05975021	LIHC	male-bias	0.207866	20.9874	1.96033e-24	7.13337e-19	0.0896487	1	X	11310708	ARHGAP6	Body-opensea
cg00114913	LIHC	female-bias	-0.328731	-20.2744	7.72589e-24	2.81134e-18	-0.0283609	1	X	118107540	LONRF3	TSS1500-island
cg20123374	LIHC	male-bias	0.173524	20.1397	1.00547e-23	3.65875e-18	0.00632774	1	X	152062988		IGR-shelf
cg02590287	LIHC	male-bias	0.223124	19.8525	1.77176e-23	6.44719e-18	0.0846503	1	X	106161451	CLDN2	5'UTR-opensea
cg13125542	LIHC	female-bias	-0.356927	-19.3761	4.60215e-23	1.67466e-17	-0.087139	1	X	129304952	RAB33A	TSS1500-island
cg23921534	LIHC	female-bias	-0.296363	-18.8151	1.45112e-22	5.28042e-17	-0.128108	1	X	82763247	POU3F4	TSS200-shore
cg04185841	LIHC	male-bias	0.168828	18.5363	2.5936e-22	9.43774e-17	0.0516675	1	X	102533138	TCEAL5	TSS1500-opensea
cg26943822	LIHC	female-bias	-0.243883	-17.3172	3.56851e-21	1.29853e-15	-0.0748269	1	X	142723713	SLITRK4	TSS1500-shore
cg24995836	LIHC	female-bias	-0.32017	-17.2991	3.71359e-21	1.35132e-15	0.00594476	1	X	151619390	GABRA3	5'UTR-opensea
cg20104776	LIHC	female-bias	-0.297419	-17.1323	5.37592e-21	1.95622e-15	-0.0821487	1	X	140271176	LDOC1	1stExon-island
cg06016684	LIHC	female-bias	-0.197219	-17.1082	5.6727e-21	2.06421e-15	-0.0354478	1	X	20134557	MAP7D2	Body-island
cg23352597	LIHC	female-bias	-0.281435	-17.0319	6.7251e-21	2.44717e-15	0.0270036	1	X	46435742	CHST7	3'UTR-shore
cg14007036	LIHC	female-bias	-0.373371	-17.0186	6.92781e-21	2.52093e-15	0.0263983	1	X	136113725	GPR101	1stExon-island
cg13748267	LIHC	female-bias	-0.310617	-16.9824	7.51205e-21	2.73353e-15	-0.0754759	1	X	47483418		IGR-shore
cg10581449	LIHC	female-bias	-0.340658	-16.7953	1.14414e-20	4.16337e-15	-0.0925214	1	X	51238781	NUDT11	Body-island
cg19974994	LIHC	male-bias	0.187371	16.7112	1.38396e-20	5.03605e-15	0.096873	1	X	115594157	CXorf61	TSS200-opensea
cg26375010	LIHC	female-bias	-0.422186	-16.71	1.38796e-20	5.05058e-15	0.0688709	1	X	118407852		IGR-shore
cg07910919	LIHC	male-bias	0.130848	16.626	1.67958e-20	6.11175e-15	0.0621021	1	X	152082866	ZNF185	TSS200-opensea
cg01112452	LIHC	female-bias	-0.259039	-16.4459	2.53422e-20	9.22167e-15	-0.0918993	1	X	117958532	ZCCHC12	5'UTR-shore
cg00960898	LIHC	female-bias	-0.349655	-16.144	5.08889e-20	1.85177e-14	-0.00602365	1	X	136113605	GPR101	1stExon-island
cg17488785	LIHC	male-bias	0.231516	16.1279	5.28288e-20	1.92237e-14	0.00617248	1	X	140009093	MIR320D2	TSS1500-opensea
cg27394478	LIHC	male-bias	0.23382	15.9182	8.62229e-20	3.13753e-14	0.042942	1	X	152683703	ZFP92	TSS200-shelf
cg18811184	LIHC	male-bias	0.169736	15.7221	1.36922e-19	4.98242e-14	0.115976	1	X	18720556	PPEF1	5'UTR-opensea
cg17547524	LIHC	female-bias	-0.310139	-15.6326	1.69347e-19	6.16228e-14	-0.0206691	1	X	117629324	DOCK11	TSS1500-island
cg11416605	LIHC	male-bias	0.176901	15.5399	2.1121e-19	7.68564e-14	0.0246768	1	X	63267928		IGR-shelf
cg21994514	LIHC	female-bias	-0.222057	-15.5398	2.11253e-19	7.68719e-14	-0.00291953	1	X	67906568	STARD8	5'UTR-shore
cg20858239	LIHC	female-bias	-0.263729	-15.4253	2.77938e-19	1.01138e-13	0.0258122	1	X	54834222	MAGED2	1stExon-shore
cg03717424	LIHC	male-bias	0.170884	15.2993	3.76382e-19	1.3696e-13	0.120947	1	X	67651132	OPHN1	Body-shore
cg14113919	LIHC	female-bias	-0.265782	-15.2213	4.54537e-19	1.654e-13	-0.14754	1	X	20134908	MAP7D2	TSS200-island
cg12423482	LIHC	female-bias	-0.274038	-15.1933	4.86497e-19	1.7703e-13	0.0200984	1	X	21676871	KLHL34	TSS1500-island
cg21224730	LIHC	female-bias	-0.237499	-15.1553	5.33563e-19	1.94156e-13	0.00157221	1	X	123220554	STAG2	Body-opensea
cg04549977	LIHC	male-bias	0.219276	15.047	6.94514e-19	2.52724e-13	0.141461	1	X	63613026	MTMR8	Body-shore
cg25198830	LIHC	male-bias	0.144779	14.9679	8.429e-19	3.06719e-13	0.0288622	1	X	102629912	NGFRAP1	TSS1500-shore
cg19358195	LIHC	female-bias	-0.365568	-14.7736	1.35997e-18	4.94874e-13	-0.0389293	1	X	83443518	RPS6KA6	TSS1500-shore
cg12720637	LIHC	female-bias	-0.291876	-14.7577	1.41454e-18	5.14732e-13	-0.0796337	1	X	151619769	GABRA3	1stExon-opensea
cg19881386	LIHC	female-bias	-0.242735	-14.728	1.52254e-18	5.54029e-13	-0.0103593	1	X	30327423	NR0B1	1stExon-island
cg18869368	LIHC	female-bias	-0.287113	-14.7216	1.54677e-18	5.62849e-13	-0.188388	1	X	55478180	MAGEH1	TSS1500-opensea
cg13105517	LIHC	female-bias	-0.198717	-14.6023	2.08052e-18	7.57071e-13	-0.0509731	1	X	153978857	GAB3	Body-island
cg21337832	LIHC	female-bias	-0.297643	-14.5467	2.39054e-18	8.69886e-13	-0.0909041	1	X	24665655	PCYT1B	Body-opensea
cg25640635	LIHC	female-bias	-0.195325	-14.2934	4.5186e-18	1.64426e-12	0.021117	1	X	100740535	ARMCX4	Body-island
cg27048639	LIHC	male-bias	0.196627	14.2905	4.55166e-18	1.65629e-12	0.0813584	1	X	154252341	F8	TSS1500-shelf
cg10512285	LIHC	female-bias	-0.21144	-14.2281	5.3297e-18	1.9394e-12	-0.0256092	1	X	154493754	RAB39B	5'UTR-island
cg18470455	LIHC	female-bias	-0.329562	-14.1968	5.77113e-18	2.10003e-12	-0.00227662	1	X	102001134	BHLHB9	5'UTR-island
cg00968475	LIHC	female-bias	-0.231038	-14.0868	7.63685e-18	2.77894e-12	-0.0388575	1	X	101975738	BHLHB9	5'UTR-opensea
cg13082192	LIHC	female-bias	-0.245776	-13.9916	9.74004e-18	3.54427e-12	-0.00107715	1	X	107980358	IRS4	TSS1500-shore
cg02775256	LIHC	male-bias	0.161402	13.8627	1.3568e-17	4.9372e-12	0.0626607	1	X	64708686	ZC3H12B	TSS200-opensea
cg02345317	LIHC	female-bias	-0.234913	-13.8535	1.38938e-17	5.05576e-12	-0.101058	1	X	70364543	NLGN3	TSS200-opensea
cg20546893	LIHC	male-bias	0.260123	13.8258	1.49231e-17	5.43032e-12	0.0430915	1	X	51149573	CXorf67	TSS200-shore
cg01134497	LIHC	male-bias	0.216914	13.6339	2.45557e-17	8.93549e-12	0.0949152	1	X	27999627	DCAF8L1	TSS200-opensea
cg02779592	LIHC	male-bias	0.217774	13.592	2.73876e-17	9.96598e-12	0.0306319	1	X	99899134	SRPX2	TSS200-opensea
cg14745824	LIHC	male-bias	0.224661	13.5307	3.21494e-17	1.16987e-11	0.172699	1	X	68979753	EDA	3'UTR-opensea
cg14936904	LIHC	female-bias	-0.261116	-13.4921	3.55766e-17	1.29458e-11	-0.153649	1	X	117957565	ZCCHC12	TSS1500-shore
cg06455206	LIHC	female-bias	-0.287751	-13.4021	4.50667e-17	1.63992e-11	-0.150037	1	X	49643431	USP27X	TSS1500-island
cg18126630	LIHC	male-bias	0.202468	13.2737	6.32765e-17	2.30254e-11	0.0292515	1	X	136130649		IGR-shelf
cg23518228	LIHC	male-bias	0.164876	13.2406	6.90716e-17	2.51342e-11	0.0987174	1	X	21777644	SMPX	TSS1500-opensea
cg19541233	LIHC	male-bias	0.114678	13.1536	8.70488e-17	3.16758e-11	0.00198411	1	X	51152273		IGR-shore
cg07358738	LIHC	male-bias	0.194872	13.1067	9.86632e-17	3.59022e-11	0.056935	1	X	115569065	SLC6A14	Body-opensea
cg00547789	LIHC	female-bias	-0.271973	-13.0574	1.12543e-16	4.09529e-11	0.00276194	1	X	154493750	RAB39B	5'UTR-island
cg05559795	LIHC	female-bias	-0.306454	-13.0182	1.25001e-16	4.5486e-11	-0.119777	1	X	56258812	KLF8	TSS200-shore
cg12075996	LIHC	male-bias	0.207519	13.0182	1.25022e-16	4.54936e-11	0.103918	1	X	17758966	SCML1	5'UTR-shelf
cg15490039	LIHC	female-bias	-0.153717	-12.9459	1.51791e-16	5.52348e-11	-0.050583	1	X	140271719	LDOC1	TSS1500-shore
cg14759284	LIHC	female-bias	-0.170021	-12.9161	1.64484e-16	5.98535e-11	-0.055657	1	X	38080303	SRPX	TSS200-shore
cg17863679	LIHC	female-bias	-0.0927837	-12.85	1.96581e-16	7.15332e-11	-0.0231629	1	X	84499750	ZNF711	5'UTR-island
cg02295369	LIHC	female-bias	-0.243363	-12.8354	2.04534e-16	7.44271e-11	-0.0522118	1	X	117959263	ZCCHC12	Body-shore
cg13316877	LIHC	male-bias	0.185913	12.828	2.08639e-16	7.59207e-11	0.130469	1	X	71364210	FLJ44635	1stExon-opensea
cg18000886	LIHC	female-bias	-0.181525	-12.8259	2.09819e-16	7.63503e-11	-0.09646	1	X	25034241	ARX	TSS200-island
cg11271203	LIHC	female-bias	-0.145941	-12.815	2.1614e-16	7.86503e-11	-0.0196438	1	X	51636206	MAGED1	TSS1500-shore
cg07767690	LIHC	female-bias	-0.161027	-12.8033	2.23079e-16	8.11753e-11	-0.011704	1	X	54834292	MAGED2	TSS1500-shore
cg03558222	LIHC	female-bias	-0.296511	-12.7996	2.25323e-16	8.19919e-11	-0.0732842	1	X	47483257		IGR-island
cg02193580	LIHC	female-bias	-0.252024	-12.7713	2.43285e-16	8.85281e-11	0.0583364	1	X	135251444	FHL1	TSS200-opensea
cg25832529	LIHC	male-bias	0.15987	12.7585	2.51885e-16	9.16574e-11	0.119168	1	X	77915772	ZCCHC5	TSS1500-opensea
cg11005845	LIHC	female-bias	-0.187729	-12.6789	3.12742e-16	1.13802e-10	-0.111875	1	X	140271314	LDOC1	TSS200-island
cg08814148	LIHC	female-bias	-0.19428	-12.6583	3.30793e-16	1.20371e-10	0.0911391	1	X	118407645		IGR-island
cg00525383	LIHC	female-bias	-0.229822	-12.6521	3.36445e-16	1.22428e-10	-0.0754032	1	X	136647793	ZIC3	TSS1500-island
cg17198372	LIHC	male-bias	0.105108	12.6066	3.80864e-16	1.38591e-10	0.0913167	1	X	18708953	PPEF1	TSS200-opensea
cg21389621	LIHC	female-bias	-0.294372	-12.5741	4.16353e-16	1.51505e-10	-0.144645	1	X	12993164	TMSB4X	TSS200-island
cg27189967	LIHC	male-bias	0.17903	12.5641	4.27913e-16	1.55711e-10	0.177085	1	X	151821766	GABRQ	3'UTR-opensea
cg10127415	LIHC	male-bias	0.179823	12.5448	4.51053e-16	1.64132e-10	0.0814854	1	X	26210523	MAGEB6	TSS200-opensea
cg19570406	LIHC	male-bias	0.222565	12.5292	4.70839e-16	1.71332e-10	0.0676044	1	X	152684911	ZFP92	Body-shore
cg26791349	LIHC	female-bias	-0.204263	-12.5024	5.06775e-16	1.84408e-10	0.150003	1	X	153668416	GDI1	Body-shelf
cg10646080	LIHC	female-bias	-0.205946	-12.5005	5.09319e-16	1.85334e-10	-0.0720362	1	X	130191821	FLJ30058	TSS1500-shore
cg04642759	LIHC	female-bias	-0.214038	-12.4745	5.4703e-16	1.99057e-10	-0.0943447	1	X	144898689	SLITRK2	TSS1500-shore
cg00412010	LIHC	female-bias	-0.223998	-12.4732	5.49117e-16	1.99816e-10	-0.0620039	1	X	110339837	PAK3	5'UTR-shore
cg06431415	LIHC	male-bias	0.229144	12.4255	6.26085e-16	2.27823e-10	0.0356989	1	X	133115985	GPC3	Body-shelf
cg07069660	LIHC	male-bias	0.199362	12.4221	6.32013e-16	2.29981e-10	0.0829032	1	X	49957476	AKAP4	Body-opensea
cg13774080	LIHC	male-bias	0.194516	12.3731	7.2351e-16	2.63275e-10	0.133224	1	X	134156809	FAM127C	TSS1500-shore
cg02019635	LIHC	male-bias	0.100038	12.3583	7.53643e-16	2.7424e-10	0.0959594	1	X	101145699	ZMAT1	TSS1500-opensea
cg26968501	LIHC	female-bias	-0.176617	-12.3425	7.87335e-16	2.865e-10	-0.0272275	1	X	82765734		IGR-island
cg11865900	LIHC	female-bias	-0.232484	-12.3306	8.13687e-16	2.96089e-10	0.0217922	1	X	153215934	HCFC1	Body-shelf
cg10448608	LIHC	female-bias	-0.289441	-12.3086	8.64667e-16	3.1464e-10	-0.0732668	1	X	144903748	SLITRK2	5'UTR-island
cg27505047	LIHC	female-bias	-0.303741	-12.2807	9.34373e-16	3.40005e-10	-0.0684796	1	X	133684884		IGR-island
cg12650780	LIHC	female-bias	-0.305993	-12.1845	1.22065e-15	4.44176e-10	-0.0932383	1	X	80458049	SH3BGRL	Body-opensea
cg09368035	LIHC	male-bias	0.208448	12.1598	1.30777e-15	4.75879e-10	0.0679924	1	X	39943369	BCOR	5'UTR-island
cg03094405	LIHC	male-bias	0.197046	12.1594	1.30942e-15	4.76479e-10	0.0564179	1	X	11284830	ARHGAP6	Body-opensea
cg16697940	LIHC	female-bias	-0.14351	-12.1403	1.38073e-15	5.0243e-10	-0.0736209	1	X	140271321	LDOC1	TSS200-island
cg05911704	LIHC	female-bias	-0.337207	-12.126	1.43717e-15	5.22966e-10	-0.0162535	1	X	129304869	RAB33A	TSS1500-shore
cg24443136	LIHC	male-bias	0.145654	12.0767	1.64975e-15	6.00322e-10	0.0884547	1	X	152801587	ATP2B3	1stExon-opensea
cg20788415	LIHC	female-bias	-0.219607	-12.022	1.9233e-15	6.99862e-10	-0.075789	1	X	133305793	MIR106A	TSS1500-island
cg02053896	LIHC	female-bias	-0.229217	-11.9923	2.09018e-15	7.60587e-10	-0.128542	1	X	70151117	SLC7A3	TSS200-shore
cg06145357	LIHC	male-bias	0.215435	11.9778	2.17727e-15	7.92278e-10	0.068201	1	X	149010149	MAGEA8	5'UTR-opensea
cg11629919	LIHC	male-bias	0.104666	11.9506	2.3508e-15	8.55422e-10	0.0206671	1	X	115594200	CXorf61	TSS200-opensea
cg20456193	LIHC	male-bias	0.169329	11.9449	2.38852e-15	8.69149e-10	0.075128	1	X	152801636	ATP2B3	1stExon-opensea
cg09484077	LIHC	male-bias	0.153529	11.9304	2.48792e-15	9.05319e-10	0.0752192	1	X	103029964	PLP1	TSS1500-opensea
cg12553336	LIHC	male-bias	0.165461	11.8506	3.11719e-15	1.1343e-09	0.10545	1	X	153090536	PDZD4	Body-shelf
cg22627750	LIHC	male-bias	0.154481	11.8434	3.18117e-15	1.15758e-09	0.154392	1	X	50216175		IGR-shore
cg19169658	LIHC	male-bias	0.190253	11.8189	3.40938e-15	1.24063e-09	0.154368	1	X	114423840	RBMXL3	TSS200-shore
cg25820515	LIHC	female-bias	-0.167952	-11.808	3.51687e-15	1.27974e-09	-0.0617627	1	X	106147503	CLDN2	5'UTR-opensea
cg25908030	LIHC	female-bias	-0.194946	-11.7896	3.70469e-15	1.34808e-09	-0.0630993	1	X	119124801		IGR-island
cg20967299	LIHC	male-bias	0.201779	11.7873	3.72918e-15	1.35699e-09	0.148458	1	X	68833308		IGR-shelf
cg18116135	LIHC	female-bias	-0.188979	-11.7824	3.78125e-15	1.37595e-09	0.00776826	1	X	80457960	SH3BGRL	Body-opensea
cg00191903	LIHC	male-bias	0.135425	11.7775	3.83491e-15	1.39547e-09	0.0368651	1	X	105451070	MUM1L1	Body-opensea
cg22901146	LIHC	male-bias	0.181933	11.7626	4.00011e-15	1.45558e-09	0.0693727	1	X	108725107	GUCY2F	1stExon-opensea
cg05129588	LIHC	male-bias	0.133002	11.7504	4.14137e-15	1.50699e-09	0.0877045	1	X	69425049	DGAT2L6	3'UTR-opensea
cg06925836	LIHC	male-bias	0.21316	11.7192	4.52495e-15	1.64656e-09	0.0938943	1	X	48542214	WAS	5'UTR-opensea
cg04070122	LIHC	female-bias	-0.3003	-11.673	5.16237e-15	1.87852e-09	-0.0673716	1	X	154493215	RAB39B	Body-shore
cg23299641	LIHC	female-bias	-0.185367	-11.6694	5.21542e-15	1.89782e-09	-0.0607654	1	X	108868237	KCNE1L	1stExon-island
cg20781898	LIHC	male-bias	0.129624	11.6083	6.21017e-15	2.2598e-09	0.0681509	1	X	50218103		IGR-shelf
cg02645343	LIHC	female-bias	-0.246876	-11.5923	6.50026e-15	2.36535e-09	-0.0847685	1	X	134656105	DDX26B	Body-island
cg13809962	LIHC	female-bias	-0.14896	-11.5896	6.55173e-15	2.38408e-09	-0.0714837	1	X	84498932	ZNF711	TSS200-island
cg16931980	LIHC	male-bias	0.127146	11.5889	6.56463e-15	2.38878e-09	0.0480207	1	X	35816452	MAGEB16	TSS200-opensea
cg20795578	LIHC	female-bias	-0.180263	-11.5639	7.05228e-15	2.56622e-09	-0.00784293	1	X	136632532		IGR-island
cg06902764	LIHC	female-bias	-0.221256	-11.5511	7.3152e-15	2.6619e-09	-0.0250326	1	X	139586086	SOX3	1stExon-island
cg23862713	LIHC	female-bias	-0.219128	-11.5346	7.66995e-15	2.79099e-09	-0.130552	1	X	139587270	SOX3	TSS200-island
cg00741717	LIHC	male-bias	0.129693	11.5191	8.018e-15	2.91764e-09	0.0943941	1	X	12924184	TLR8	TSS1500-opensea
cg07911140	LIHC	male-bias	0.201995	11.5155	8.10218e-15	2.94827e-09	0.0677137	1	X	135631653	VGLL1	Body-opensea
cg26395098	LIHC	male-bias	0.0993884	11.4903	8.71137e-15	3.16994e-09	0.098584	1	X	30233603	MAGEB2	TSS200-opensea
cg00854963	LIHC	female-bias	-0.156268	-11.4249	1.05147e-14	3.82616e-09	-0.053091	1	X	70364566	NLGN3	TSS200-opensea
cg26937310	LIHC	female-bias	-0.178451	-11.417	1.07576e-14	3.91453e-09	-0.00707354	1	X	102531708	TCEAL5	1stExon-opensea
cg19599472	LIHC	male-bias	0.21039	11.4077	1.10506e-14	4.02116e-09	0.102913	1	X	74739430	ZDHHC15	Body-shelf
cg26414720	LIHC	male-bias	0.133567	11.3929	1.15339e-14	4.19703e-09	0.0200833	1	X	152487462	MAGEA1	TSS1500-opensea
cg04625493	LIHC	male-bias	0.139037	11.3915	1.15809e-14	4.21413e-09	0.112945	1	X	65241977	VSIG4	3'UTR-opensea
cg00412368	LIHC	female-bias	-0.283989	-11.3534	1.2928e-14	4.70432e-09	-0.114836	1	X	138285393	FGF13	5'UTR-island
cg02896496	LIHC	female-bias	-0.25177	-11.3384	1.3501e-14	4.91281e-09	0.0389946	1	X	54385394	WNK3	TSS1500-island
cg22495120	LIHC	male-bias	0.107708	11.3232	1.4111e-14	5.13481e-09	0.0868866	1	X	147063094	FMR1NB	1stExon-shore
cg12901064	LIHC	female-bias	-0.263494	-11.3221	1.41528e-14	5.15e-09	-0.0542151	1	X	75392571	CXorf26	TSS200-opensea
cg21500538	LIHC	male-bias	0.145354	11.2447	1.77186e-14	6.44755e-09	0.0342864	1	X	152683655	ZFP92	TSS200-shelf
cg25904743	LIHC	male-bias	0.16411	11.2443	1.77392e-14	6.45503e-09	0.0492201	1	X	135617725	VGLL1	5'UTR-opensea
cg01593269	LIHC	female-bias	-0.227	-11.2361	1.81664e-14	6.6105e-09	-0.126605	1	X	152676703		IGR-island
cg06190216	LIHC	male-bias	0.172622	11.1614	2.2583e-14	8.21763e-09	0.0912915	1	X	152771994	BGN	Body-opensea
cg20569128	LIHC	female-bias	-0.217573	-11.1504	2.3324e-14	8.48728e-09	0.0466068	1	X	136656575		IGR-island
cg03598440	LIHC	female-bias	-0.22784	-11.1465	2.35853e-14	8.58238e-09	-0.0875726	1	X	99663330	PCDH19	1stExon-island
cg22829182	LIHC	female-bias	-0.308897	-11.1338	2.44779e-14	8.90718e-09	-0.123383	1	X	56258808	KLF8	TSS200-shore
cg14150883	LIHC	male-bias	0.128227	11.0763	2.89617e-14	1.05388e-08	0.0809305	1	X	71355311	NHSL2	Body-shelf
cg19127840	LIHC	male-bias	0.206109	11.0714	2.93811e-14	1.06914e-08	0.0331101	1	X	65238616	MIR223	TSS200-opensea
cg24691854	LIHC	female-bias	-0.200207	-11.062	3.02063e-14	1.09917e-08	-0.0849341	1	X	139593162		IGR-island
cg26959464	LIHC	male-bias	0.184533	11.033	3.28811e-14	1.1965e-08	0.0378249	1	X	118288798		IGR-shelf
cg09195491	LIHC	female-bias	-0.330713	-11.0201	3.41538e-14	1.24281e-08	-0.0719337	1	X	56258900	KLF8	5'UTR-shore
cg21002399	LIHC	female-bias	-0.188727	-10.993	3.69817e-14	1.34571e-08	-0.0465943	1	X	106147584	CLDN2	5'UTR-opensea
cg20134598	LIHC	female-bias	-0.157033	-10.9588	4.09001e-14	1.4883e-08	-0.0572301	1	X	54947308	TRO	5'UTR-opensea
cg07005924	LIHC	male-bias	0.224813	10.9588	4.0901e-14	1.48833e-08	0.117504	1	X	37001209		IGR-shelf
cg24340926	LIHC	female-bias	-0.275489	-10.9532	4.15738e-14	1.51281e-08	-0.0599901	1	X	129305036	RAB33A	TSS1500-island
cg15228617	LIHC	male-bias	0.144663	10.9142	4.66474e-14	1.69743e-08	0.139905	1	X	151811649	GABRQ	Body-opensea
cg14592807	LIHC	male-bias	0.172006	10.9016	4.84173e-14	1.76184e-08	-0.0205897	1	X	27481416	SMEK3P	Body-opensea
cg25517979	LIHC	male-bias	0.199224	10.8962	4.91832e-14	1.78971e-08	0.0480669	1	X	152682946	ZFP92	TSS1500-shelf
cg15016628	LIHC	male-bias	0.188746	10.849	5.65467e-14	2.05765e-08	0.0447808	1	X	135570188	BRS3	1stExon-opensea
cg02992777	LIHC	male-bias	0.131799	10.8445	5.73141e-14	2.08558e-08	-0.0303094	1	X	102320380	BEX1	TSS1500-shore
cg01490258	LIHC	male-bias	0.253564	10.7816	6.90561e-14	2.51285e-08	0.0351788	1	X	40030456	BCOR	5'UTR-shore
cg07187723	LIHC	male-bias	0.215321	10.7741	7.06031e-14	2.56915e-08	0.102304	1	X	110463862	PAK3	3'UTR-opensea
cg14562990	LIHC	female-bias	-0.230058	-10.7684	7.18116e-14	2.61312e-08	-0.0595144	1	X	140271626	LDOC1	TSS1500-shore
cg06455967	LIHC	female-bias	-0.15925	-10.7444	7.71263e-14	2.80652e-08	-0.0351075	1	X	110187421	PAK3	TSS200-opensea
cg12321798	LIHC	male-bias	0.132786	10.7382	7.85428e-14	2.85806e-08	0.105308	1	X	71363939	FLJ44635	TSS200-opensea
cg01178063	LIHC	male-bias	0.211802	10.7285	8.08476e-14	2.94193e-08	0.091022	1	X	69283055	OTUD6A	1stExon-island
cg18496230	LIHC	male-bias	0.176659	10.7244	8.18365e-14	2.97792e-08	0.0441462	1	X	102562302		IGR-shelf
cg26809968	LIHC	male-bias	0.0962252	10.7167	8.37425e-14	3.04727e-08	0.0548435	1	X	153409414	OPN1LW	TSS1500-opensea
cg22474124	LIHC	male-bias	0.175883	10.7104	8.53348e-14	3.10521e-08	0.100844	1	X	128913876	SASH3	TSS200-opensea
cg15578989	LIHC	male-bias	0.169906	10.7055	8.65708e-14	3.15019e-08	0.0796939	1	X	134157153	FAM127C	TSS1500-shore
cg20840456	LIHC	male-bias	0.104767	10.6978	8.85859e-14	3.22352e-08	0.0518298	1	X	75391688	CXorf26	TSS1500-opensea
cg06406538	LIHC	male-bias	0.146373	10.6644	9.7846e-14	3.56048e-08	0.0587467	1	X	56255850		IGR-shelf
cg13851721	LIHC	male-bias	0.142066	10.6621	9.85186e-14	3.58495e-08	0.132457	1	X	109917662	CHRDL1	3'UTR-opensea
cg05867448	LIHC	female-bias	-0.205903	-10.6397	1.05331e-13	3.83286e-08	-0.0376838	1	X	130192575	FLJ30058	5'UTR-island
cg02370478	LIHC	male-bias	0.16744	10.6207	1.11478e-13	4.05653e-08	0.130644	1	X	106241676	MORC4	Body-shore
cg22618086	LIHC	female-bias	-0.178418	-10.6001	1.18589e-13	4.31528e-08	-0.00356982	1	X	11446101	ARHGAP6	Body-island
cg04730443	LIHC	male-bias	0.178009	10.5921	1.21452e-13	4.41946e-08	0.0372233	1	X	26210529	MAGEB6	TSS200-opensea
cg18617708	LIHC	male-bias	0.25127	10.5849	1.24106e-13	4.51605e-08	0.0935646	1	X	105280566	SERPINA7	1stExon-opensea
cg23221557	LIHC	female-bias	-0.158308	-10.5295	1.46495e-13	5.33075e-08	-0.126508	1	X	25025714	ARX	Body-island
cg15339180	LIHC	female-bias	-0.17909	-10.5103	1.55192e-13	5.64721e-08	-0.0487437	1	X	70364545	NLGN3	TSS200-opensea
cg01465073	LIHC	female-bias	-0.16167	-10.5044	1.57964e-13	5.74809e-08	-0.139824	1	X	153152165		IGR-island
cg22569587	LIHC	female-bias	-0.19797	-10.5019	1.5913e-13	5.79052e-08	-0.146416	1	X	9733544	GPR143	Body-island
cg03576235	LIHC	male-bias	0.182464	10.4879	1.6601e-13	6.04086e-08	0.0660903	1	X	26576430	VENTXP1	TSS200-shore
cg02183297	LIHC	male-bias	0.145665	10.4736	1.7329e-13	6.30579e-08	0.0594072	1	X	108867379	KCNE1L	3'UTR-shore
cg08409066	LIHC	male-bias	0.095822	10.4669	1.76795e-13	6.43332e-08	0.0331334	1	X	152662396		IGR-shelf
cg00688681	LIHC	female-bias	-0.186343	-10.4558	1.82811e-13	6.65223e-08	-0.0419111	1	X	53030043		IGR-island
cg24882168	LIHC	male-bias	0.134848	10.4461	1.88201e-13	6.84838e-08	0.0849223	1	X	123467232		IGR-shore
cg13486082	LIHC	male-bias	0.0979639	10.4333	1.95635e-13	7.11889e-08	0.0100827	1	X	102629870	NGFRAP1	TSS1500-shore
cg24883860	LIHC	male-bias	0.157015	10.4111	2.09177e-13	7.61165e-08	0.0643093	1	X	114524284	LUZP4	TSS200-opensea
cg01992935	LIHC	female-bias	-0.265627	-10.4081	2.1104e-13	7.67945e-08	-0.100517	1	X	108868271	KCNE1L	1stExon-island
cg15813836	LIHC	female-bias	-0.179359	-10.4025	2.14649e-13	7.81076e-08	-0.0317684	1	X	19141093	GPR64	TSS1500-island
cg12268565	LIHC	female-bias	-0.309385	-10.3882	2.24117e-13	8.1553e-08	0.0488627	1	X	133685325		IGR-island
cg11179997	LIHC	female-bias	-0.175061	-10.3474	2.53514e-13	9.22502e-08	-0.106841	1	X	119125670		IGR-island
cg22203323	LIHC	male-bias	0.186536	10.3351	2.63128e-13	9.57488e-08	0.0865672	1	X	49084529	CACNA1F	Body-shelf
cg20931907	LIHC	male-bias	0.182642	10.3091	2.84687e-13	1.03594e-07	0.0844006	1	X	51149742	CXorf67	TSS200-island
cg06720669	LIHC	female-bias	-0.236707	-10.2934	2.98471e-13	1.08609e-07	-0.0829606	1	X	108868282	KCNE1L	1stExon-island
cg26140836	LIHC	male-bias	0.210303	10.2639	3.26417e-13	1.18778e-07	0.0741879	1	X	108870738		IGR-shelf
cg06168286	LIHC	male-bias	0.137572	10.232	3.59603e-13	1.30855e-07	0.106687	1	X	68524259		IGR-shore
cg20446252	LIHC	male-bias	0.159932	10.2093	3.85318e-13	1.40212e-07	0.0444953	1	X	150797951	PASD1	Body-opensea
cg00690049	LIHC	female-bias	-0.188428	-10.1871	4.1224e-13	1.50008e-07	0.00234307	1	X	54834244	MAGED2	TSS1500-shore
cg17123338	LIHC	female-bias	-0.189279	-10.1448	4.69e-13	1.70662e-07	-0.0579528	1	X	153361684	MECP2	Body-shore
cg07892139	LIHC	male-bias	0.149804	10.1364	4.81135e-13	1.75078e-07	0.112867	1	X	84192519		IGR-shelf
cg04023829	LIHC	male-bias	0.102859	10.1271	4.94922e-13	1.80095e-07	0.0708024	1	X	152583836		IGR-shore
cg17627526	LIHC	female-bias	-0.21722	-10.108	5.24683e-13	1.90925e-07	-0.110139	1	X	24665508	PCYT1B	TSS200-opensea
cg08769559	LIHC	female-bias	-0.093343	-10.0827	5.66867e-13	2.06275e-07	-0.0705287	1	X	25034121	ARX	TSS200-island
cg20774140	LIHC	male-bias	0.105445	10.0588	6.09739e-13	2.21876e-07	0.0706237	1	X	108980567		IGR-shelf
cg24744459	LIHC	female-bias	-0.187091	-10.0516	6.23495e-13	2.26881e-07	-0.0965518	1	X	136649489	ZIC3	1stExon-island
cg12548693	LIHC	male-bias	0.14882	10.0329	6.60147e-13	2.40218e-07	0.0848342	1	X	65237413	MIR223	TSS1500-opensea
cg00369477	LIHC	female-bias	-0.140992	-10.0253	6.75672e-13	2.45868e-07	-0.114669	1	X	113818635	HTR2C	5'UTR-island
cg09231482	LIHC	female-bias	-0.230852	-9.99495	7.4158e-13	2.69851e-07	-0.115489	1	X	154493497	RAB39B	1stExon-island
cg05254049	LIHC	female-bias	-0.226838	-9.98007	7.76238e-13	2.82462e-07	-0.0355752	1	X	47479662	SYN1	TSS1500-shore
cg03697809	LIHC	female-bias	-0.226203	-9.97829	7.80479e-13	2.84005e-07	-0.143503	1	X	106750775		IGR-island
cg26563418	LIHC	male-bias	0.160781	9.97604	7.85882e-13	2.85972e-07	0.0587433	1	X	130204910	FLJ30058	5'UTR-shelf
cg25485190	LIHC	male-bias	0.114985	9.97512	7.88107e-13	2.86781e-07	0.0960168	1	X	17883294		IGR-shelf
cg07769622	LIHC	male-bias	0.141092	9.96096	8.23149e-13	2.99533e-07	0.0778001	1	X	27481498	SMEK3P	TSS200-opensea
cg20849987	LIHC	male-bias	0.0768266	9.94786	8.56965e-13	3.11838e-07	0.0421048	1	X	114524470	LUZP4	Body-opensea
cg09050238	LIHC	male-bias	0.0997165	9.91455	9.49425e-13	3.45483e-07	0.0674448	1	X	117955280		IGR-shelf
cg04497165	LIHC	male-bias	0.195777	9.88306	1.04611e-12	3.80664e-07	0.086708	1	X	103494417		IGR-shore
cg01776229	LIHC	female-bias	-0.23119	-9.8813	1.0518e-12	3.82734e-07	-0.0947782	1	X	82764385	POU3F4	1stExon-island
cg02969243	LIHC	female-bias	-0.217581	-9.83157	1.22619e-12	4.46194e-07	-0.0490941	1	X	11445762	ARHGAP6	Body-island
cg12537796	LIHC	female-bias	-0.256724	-9.80469	1.33241e-12	4.84846e-07	-0.0387615	1	X	106515818		IGR-island
cg21412053	LIHC	male-bias	0.183739	9.79186	1.38635e-12	5.04473e-07	0.0247182	1	X	34165329		IGR-island
cg23218997	LIHC	female-bias	-0.188994	-9.78364	1.42205e-12	5.17465e-07	-0.0251915	1	X	102862639	TCEAL3	TSS200-shore
cg16164539	LIHC	male-bias	0.173004	9.78167	1.43073e-12	5.20622e-07	0.0627869	1	X	122624079	GRIA3	3'UTR-opensea
cg02185190	LIHC	male-bias	0.138822	9.7692	1.48704e-12	5.41112e-07	0.038121	1	X	118534462	SLC25A43	Body-shore
cg12544401	LIHC	male-bias	0.159941	9.76723	1.49616e-12	5.44433e-07	0.0498271	1	X	103291721	MIR1256	Body-shelf
cg05585317	LIHC	female-bias	-0.233744	-9.73504	1.65303e-12	6.01514e-07	0.0305445	1	X	53117682	TSPYL2	3'UTR-island
cg25270089	LIHC	male-bias	0.176626	9.73099	1.67396e-12	6.0913e-07	0.0775062	1	X	153099097		IGR-shelf
cg22040303	LIHC	male-bias	0.149372	9.72544	1.70298e-12	6.19689e-07	0.057553	1	X	150912076	CNGA2	Body-opensea
cg03331695	LIHC	male-bias	0.145369	9.71986	1.73275e-12	6.30522e-07	0.0599468	1	X	102775412	RAB40A	TSS1500-opensea
cg08062822	LIHC	female-bias	-0.187562	-9.7189	1.73791e-12	6.32401e-07	0.14408	1	X	103356845	MCART6	5'UTR-shore
cg01361446	LIHC	male-bias	0.193846	9.71598	1.75373e-12	6.38157e-07	0.139633	1	X	70331315	IL2RG	1stExon-opensea
cg15452747	LIHC	female-bias	-0.20078	-9.71405	1.76424e-12	6.41983e-07	-0.0222561	1	X	68726029	FAM155B	Body-island
cg02495445	LIHC	male-bias	0.175353	9.7014	1.83487e-12	6.67685e-07	0.0813483	1	X	34406154		IGR-island
cg05559881	LIHC	female-bias	-0.132872	-9.69564	1.86803e-12	6.7975e-07	-0.0662617	1	X	136651644	ZIC3	Body-island
cg18221317	LIHC	male-bias	0.0662218	9.69117	1.89411e-12	6.8924e-07	-0.0444424	1	X	152683771	ZFP92	TSS200-shelf
cg16864365	LIHC	female-bias	-0.176778	-9.6717	2.01224e-12	7.32227e-07	-0.0866751	1	X	48959149	WDR45	TSS1500-shore
cg15230046	LIHC	female-bias	-0.19443	-9.6368	2.24293e-12	8.16169e-07	-0.011765	1	X	101909850	GPRASP1	Body-shelf
cg11146367	LIHC	male-bias	0.167372	9.62096	2.35634e-12	8.57441e-07	0.0998813	1	X	49593756	PAGE4	TSS200-opensea
cg00809111	LIHC	female-bias	-0.15451	-9.61202	2.42288e-12	8.81653e-07	-0.0479827	1	X	130192134	FLJ30058	TSS200-island
cg13937075	LIHC	female-bias	-0.258992	-9.58625	2.62557e-12	9.55409e-07	0.0740743	1	X	136113882	GPR101	TSS200-island
cg10473383	LIHC	female-bias	-0.178171	-9.52777	3.15148e-12	1.14678e-06	-0.0180698	1	X	84498775	ZNF711	TSS1500-island
cg16414561	LIHC	female-bias	-0.245934	-9.50018	3.43552e-12	1.25014e-06	-0.12428	1	X	25033893	ARX	1stExon-island
cg12879539	LIHC	male-bias	0.127114	9.48141	3.64337e-12	1.32577e-06	0.0809387	1	X	45607438	MIR222	TSS1500-opensea
cg21411291	LIHC	male-bias	0.151535	9.47289	3.74193e-12	1.36164e-06	0.0901805	1	X	148577025	IDS	Body-opensea
cg11834527	LIHC	male-bias	0.200334	9.4724	3.74759e-12	1.3637e-06	0.0150106	1	X	149008828	MAGEA8	TSS1500-opensea
cg22597771	LIHC	male-bias	0.184173	9.46459	3.84047e-12	1.39749e-06	0.142553	1	X	151336548	GABRA3	3'UTR-opensea
cg09895626	LIHC	male-bias	0.13909	9.39973	4.70721e-12	1.71289e-06	0.0614849	1	X	134476314	ZNF75D	5'UTR-shore
cg05849149	LIHC	female-bias	-0.195225	-9.3951	4.77619e-12	1.73799e-06	-0.0916784	1	X	68048224	EFNB1	TSS1500-shore
cg13897449	LIHC	female-bias	-0.178263	-9.3842	4.94253e-12	1.79852e-06	-0.00431834	1	X	55021841	PFKFB1	TSS1500-opensea
cg05100268	LIHC	female-bias	-0.129978	-9.37079	5.15532e-12	1.87595e-06	-0.11897	1	X	153640967	DNASE1L1	TSS1500-shore
cg12506468	LIHC	male-bias	0.136185	9.34677	5.56012e-12	2.02325e-06	0.0482419	1	X	33147978	DMD	TSS1500-opensea
cg26310256	LIHC	female-bias	-0.144798	-9.34376	5.61303e-12	2.0425e-06	-0.0346455	1	X	13588301	EGFL6	Body-shore
cg06282524	LIHC	female-bias	-0.156541	-9.33818	5.71243e-12	2.07867e-06	-0.0520595	1	X	139593371		IGR-island
cg06107108	LIHC	male-bias	0.0971515	9.33745	5.72569e-12	2.0835e-06	0.0917003	1	X	69723652	DLG3	3'UTR-opensea
cg03800724	LIHC	female-bias	-0.175418	-9.31905	6.06723e-12	2.20778e-06	-0.0178232	1	X	53253348	KDM5C	Body-shore
cg19002579	LIHC	male-bias	0.161135	9.31589	6.12797e-12	2.22988e-06	0.157307	1	X	21776218	SMPX	1stExon-opensea
cg09300343	LIHC	male-bias	0.185368	9.31337	6.17688e-12	2.24768e-06	0.147663	1	X	139521282		IGR-shore
cg25140188	LIHC	male-bias	0.223354	9.30633	6.31536e-12	2.29807e-06	0.058028	1	X	31087348		IGR-shelf
cg24648715	LIHC	female-bias	-0.225501	-9.30393	6.36347e-12	2.31558e-06	-0.0637154	1	X	102863004	TCEAL3	5'UTR-island
cg03315431	LIHC	male-bias	0.126087	9.28055	6.85035e-12	2.49275e-06	0.0400149	1	X	153032930	PLXNB3	Body-island
cg20922422	LIHC	female-bias	-0.317534	-9.26515	7.19164e-12	2.61694e-06	0.0372896	1	X	24665669	PCYT1B	Body-opensea
cg23404612	LIHC	male-bias	0.119573	9.26408	7.21604e-12	2.62581e-06	-0.00240606	1	X	101400003		IGR-shelf
cg22144149	LIHC	female-bias	-0.12623	-9.25325	7.4671e-12	2.71717e-06	-0.0736763	1	X	39021732		IGR-island
cg08264725	LIHC	male-bias	0.128765	9.24554	7.65117e-12	2.78415e-06	0.082261	1	X	23018003	DDX53	TSS200-opensea
cg18480129	LIHC	female-bias	-0.227115	-9.23855	7.82192e-12	2.84629e-06	-0.101556	1	X	110187465	PAK3	TSS200-opensea
cg24910352	LIHC	male-bias	0.253426	9.2143	8.44537e-12	3.07315e-06	0.0645669	1	8	11601603	GATA4	Body-opensea
cg09455225	LIHC	female-bias	-0.144511	-9.19753	8.90545e-12	3.24057e-06	-0.0624283	1	X	133684399		IGR-island
cg09821007	LIHC	female-bias	-0.136214	-9.1714	9.67391e-12	3.5202e-06	0.0151279	1	X	68348763		IGR-island
cg11620557	LIHC	male-bias	0.318296	9.14903	1.03846e-11	3.77879e-06	-0.0117211	1	X	39963545	BCOR	5'UTR-island
cg21605248	LIHC	male-bias	0.174415	9.14799	1.04188e-11	3.79126e-06	0.0547315	1	X	119382181		IGR-shelf
cg19736094	LIHC	female-bias	-0.145456	-9.12892	1.10685e-11	4.02769e-06	-0.0843755	1	X	38080327	SRPX	TSS200-shore
cg20033444	LIHC	female-bias	-0.186548	-9.12033	1.13747e-11	4.13908e-06	-0.0565915	1	X	129194010		IGR-island
cg14727709	LIHC	male-bias	0.06188	9.11699	1.1496e-11	4.18322e-06	-0.022276	1	X	49160159	GAGE10	1stExon-opensea
cg16718139	LIHC	male-bias	0.121476	9.11544	1.15524e-11	4.20375e-06	0.113376	1	X	106244935	MORC4	TSS1500-shore
cg02629737	LIHC	female-bias	-0.200631	-9.09048	1.25055e-11	4.55059e-06	-0.0763446	1	X	138285540	FGF13	5'UTR-island
cg04613080	LIHC	male-bias	0.203673	9.08921	1.25562e-11	4.56903e-06	0.0464484	1	X	150903211	CNGA2	TSS200-opensea
cg07758529	LIHC	female-bias	-0.267976	-9.08876	1.2574e-11	4.57551e-06	-0.0303721	1	X	103813150	IL1RAPL2	5'UTR-shore
cg25433595	LIHC	female-bias	-0.192455	-9.08821	1.25961e-11	4.58353e-06	-0.115444	1	X	100183764	XKRX	5'UTR-shore
cg06672093	LIHC	male-bias	0.166701	9.08392	1.2769e-11	4.64646e-06	0.0847616	1	X	103502294		IGR-shelf
cg22575892	LIHC	female-bias	-0.182697	-9.07461	1.31529e-11	4.78616e-06	-0.0675273	1	X	117629344	DOCK11	TSS1500-island
cg19846758	LIHC	male-bias	0.179832	9.07112	1.32994e-11	4.83947e-06	0.152981	1	X	109661746	AMMECR1	5'UTR-opensea
cg11188837	LIHC	male-bias	0.185635	9.06809	1.34283e-11	4.88635e-06	-0.00640643	1	X	103268309	H2BFWT	TSS200-island
cg14495593	LIHC	male-bias	0.10614	9.06759	1.34494e-11	4.89406e-06	0.0946156	1	X	27999546	DCAF8L1	5'UTR-opensea
cg25999827	LIHC	male-bias	0.128913	9.06316	1.36403e-11	4.9635e-06	0.0518981	1	10	86101707	FAM190B	5'UTR-opensea
cg08693325	LIHC	male-bias	0.165072	9.0539	1.40481e-11	5.11192e-06	0.0390454	1	X	114523818	LUZP4	TSS1500-opensea
cg00160976	LIHC	female-bias	-0.143065	-9.04546	1.44308e-11	5.25117e-06	0.0379623	1	3	150730619	CLRN1OS	Body-opensea
cg18702893	LIHC	female-bias	-0.0715615	-9.04317	1.45365e-11	5.28963e-06	0.00159915	1	X	136506825		IGR-shelf
cg23575876	LIHC	female-bias	-0.193642	-9.03385	1.49739e-11	5.44881e-06	-0.0994486	1	X	142723112	SLITRK4	TSS200-shore
cg27055580	LIHC	male-bias	0.163806	9.03362	1.49848e-11	5.45277e-06	0.116669	1	X	69396942	DGAT2L6	TSS1500-opensea
cg05638634	LIHC	male-bias	0.14145	9.01424	1.59394e-11	5.80012e-06	-0.0126585	1	X	139850091		IGR-shelf
cg12842316	LIHC	female-bias	-0.277835	-9.01038	1.61366e-11	5.87189e-06	-0.202524	1	X	142723457	SLITRK4	TSS1500-shore
cg06701191	LIHC	male-bias	0.123588	8.99216	1.71017e-11	6.22307e-06	0.0655778	1	X	65238507	MIR223	TSS1500-opensea
cg18492059	LIHC	male-bias	0.0991441	8.98208	1.76605e-11	6.4264e-06	0.0677667	1	X	48329985	SLC38A5	TSS1500-opensea
cg01354447	LIHC	male-bias	0.144329	8.98162	1.7686e-11	6.43569e-06	0.0460729	1	X	31089887	FTHL17	1stExon-island
cg00451631	LIHC	female-bias	-0.190011	-8.97003	1.83527e-11	6.6783e-06	-0.143243	1	X	25021643		IGR-island
cg24462545	LIHC	male-bias	0.133656	8.96515	1.86406e-11	6.78306e-06	0.0748262	1	X	30254216	MAGEB3	Body-opensea
cg01275664	LIHC	male-bias	0.10393	8.95496	1.9257e-11	7.00735e-06	0.0760056	1	X	34405983		IGR-island
cg10194937	LIHC	male-bias	0.127451	8.95122	1.94887e-11	7.09167e-06	0.0606869	1	X	42638108	PPP1R2P9	TSS1500-shore
cg10451565	LIHC	male-bias	0.316551	8.94962	1.95881e-11	7.12782e-06	0.0693255	1	19	47840131	GPR77	TSS1500-opensea
cg15844471	LIHC	female-bias	-0.185316	-8.93389	2.05976e-11	7.49519e-06	-0.119948	1	X	133371988	CCDC160	5'UTR-shore
cg01852560	LIHC	female-bias	-0.184378	-8.91515	2.18694e-11	7.95797e-06	-0.0394561	1	X	68348839		IGR-shore
cg15198729	LIHC	female-bias	-0.167557	-8.88723	2.39126e-11	8.70145e-06	0.0210103	1	X	100446496		IGR-island
cg05078558	LIHC	male-bias	0.186159	8.88498	2.40859e-11	8.76453e-06	0.0825632	1	X	140269750		IGR-shore
cg05789980	LIHC	female-bias	-0.148416	-8.88461	2.41142e-11	8.77483e-06	0.0207881	1	X	119442797	FAM70A	Body-shelf
cg11771863	LIHC	female-bias	-0.174837	-8.87885	2.45627e-11	8.93801e-06	0.0862257	1	X	118893434	ANKRD58	1stExon-island
cg06270497	LIHC	female-bias	-0.175147	-8.86902	2.53482e-11	9.22384e-06	-0.0699784	1	X	67906442	STARD8	5'UTR-island
cg09796544	LIHC	female-bias	-0.15924	-8.86129	2.59836e-11	9.45508e-06	-0.142432	1	X	152913595	DUSP9	Body-island
cg00815013	LIHC	female-bias	-0.165579	-8.85397	2.66005e-11	9.67955e-06	0.0479267	1	X	107681737	COL4A5	TSS1500-opensea
cg14107136	LIHC	female-bias	-0.118263	-8.84667	2.72307e-11	9.90886e-06	-0.0229706	1	X	11445620	ARHGAP6	Body-island
cg10857345	LIHC	male-bias	0.088566	8.82836	2.8877e-11	1.05079e-05	0.0876574	1	X	107225630	TEX13B	TSS200-opensea
cg08812897	LIHC	female-bias	-0.180576	-8.82734	2.89718e-11	1.05424e-05	-0.00530002	1	X	20286243	RPS6KA3	TSS1500-island
cg22848013	LIHC	male-bias	0.130606	8.81256	3.03788e-11	1.10544e-05	0.0508398	1	X	152082879	ZNF185	TSS200-opensea
cg00348113	LIHC	male-bias	0.113778	8.80182	3.14443e-11	1.14421e-05	0.107548	1	X	70149293	SLC7A3	Body-shore
cg02710173	LIHC	male-bias	0.104449	8.79325	3.23215e-11	1.17614e-05	0.0296322	1	X	153603482	FLNA	TSS1500-shore
cg08421550	LIHC	male-bias	0.168511	8.78157	3.35566e-11	1.22108e-05	0.0949434	1	X	150883777	FATE1	TSS1500-opensea
cg03248529	LIHC	male-bias	0.093374	8.77478	3.42972e-11	1.24803e-05	0.0652027	1	X	110186893	PAK3	TSS1500-opensea
cg03021892	LIHC	male-bias	0.148355	8.77172	3.46354e-11	1.26033e-05	0.104024	1	X	48329278	SLC38A5	TSS1500-opensea
cg10622126	LIHC	male-bias	0.155341	8.75864	3.61229e-11	1.31446e-05	0.130428	1	X	147598391	AFF2	Body-opensea
cg12909479	LIHC	male-bias	0.177034	8.7578	3.62202e-11	1.318e-05	0.0838738	1	X	71363268	NHSL2	Body-opensea
cg08627270	LIHC	female-bias	-0.186893	-8.74299	3.79877e-11	1.38232e-05	-0.0693939	1	X	73161223		IGR-shelf
cg10479459	LIHC	male-bias	0.185904	8.73118	3.94592e-11	1.43586e-05	0.0853634	1	X	13835198	GPM6B	1stExon-opensea
cg22651103	LIHC	female-bias	-0.089766	-8.7188	4.10622e-11	1.4942e-05	0.0321232	1	X	153232918	HCFC1	Body-shelf
cg12426996	LIHC	male-bias	0.148591	8.71703	4.1297e-11	1.50274e-05	0.0756113	1	X	123467006		IGR-island
cg00473051	LIHC	male-bias	0.171139	8.6881	4.53313e-11	1.64954e-05	0.0999296	1	X	39949232	BCOR	5'UTR-shore
cg20469935	LIHC	male-bias	0.150047	8.68121	4.63487e-11	1.68657e-05	-0.0303072	1	X	130964757	LOC286467	TSS200-opensea
cg06775759	LIHC	female-bias	-0.150478	-8.6688	4.8241e-11	1.75542e-05	-0.0427643	1	X	21676994	KLHL34	TSS1500-island
cg15465642	LIHC	female-bias	-0.173716	-8.65165	5.09848e-11	1.85526e-05	-0.0465946	1	X	153218916	HCFC1	Body-island
cg12615934	LIHC	male-bias	0.133994	8.61942	5.65756e-11	2.05871e-05	0.113562	1	X	13338875	ATXN3L	TSS1500-opensea
cg19271175	LIHC	male-bias	0.112346	8.60957	5.84046e-11	2.12526e-05	0.0645707	1	X	153188760	ARHGAP4	Body-shelf
cg13976143	LIHC	female-bias	-0.130571	-8.60899	5.85152e-11	2.12928e-05	-0.0574601	1	X	103217183	MIR1256	Body-island
cg06927864	LIHC	female-bias	-0.121698	-8.59699	6.0829e-11	2.21348e-05	-0.0285148	1	X	28604661	IL1RAPL1	TSS1500-opensea
cg07278328	LIHC	male-bias	0.148956	8.59484	6.12523e-11	2.22889e-05	0.144599	1	X	150254157		IGR-shelf
cg13286990	LIHC	male-bias	0.136442	8.58818	6.25862e-11	2.27742e-05	0.0318873	1	X	40693177	LOC100132831	TSS1500-shore
cg19208477	LIHC	female-bias	-0.160649	-8.5869	6.28459e-11	2.28687e-05	-0.0728566	1	X	140271604	LDOC1	TSS1500-shore
cg01663055	LIHC	male-bias	0.0857421	8.57406	6.55099e-11	2.38381e-05	0.0521481	1	X	67649784	OPHN1	Body-shelf
cg13817994	LIHC	female-bias	-0.138813	-8.57162	6.60297e-11	2.40273e-05	-0.0413514	1	X	152600484	ZNF275	5'UTR-shore
cg18974084	LIHC	male-bias	0.131056	8.56319	6.78557e-11	2.46918e-05	0.0152331	1	X	74146414	KIAA2022	TSS1500-shore
cg14349394	LIHC	male-bias	0.184572	8.56118	6.82974e-11	2.48525e-05	0.0915815	1	X	119151773		IGR-shelf
cg19419474	LIHC	male-bias	0.113664	8.56093	6.83533e-11	2.48728e-05	0.0963328	1	X	37544704	XK	TSS1500-shore
cg21112796	LIHC	male-bias	0.107899	8.55162	7.04453e-11	2.56341e-05	0.103299	1	X	152801238	ATP2B3	TSS1500-opensea
cg24605338	LIHC	female-bias	-0.199998	-8.53	7.5554e-11	2.74931e-05	-0.145806	1	X	17395856	NHS	Body-shore
cg09340741	LIHC	female-bias	-0.255813	-8.52037	7.79492e-11	2.83646e-05	-0.0684284	1	X	46432858	CHST7	TSS1500-shore
cg08623129	LIHC	male-bias	0.129259	8.51679	7.88575e-11	2.86951e-05	0.072976	1	X	12884470	TLR7	TSS1500-opensea
cg14149599	LIHC	male-bias	0.158963	8.50133	8.29116e-11	3.01704e-05	0.0808305	1	X	152162841		IGR-island
cg17276682	LIHC	female-bias	-0.120594	-8.45826	9.53472e-11	3.46955e-05	-0.0659095	1	X	118600932	LOC100303728	Body-shore
cg25125652	LIHC	female-bias	-0.168731	-8.45714	9.56933e-11	3.48215e-05	-0.0281923	1	X	110039604	CHRDL1	TSS1500-shore
cg19585278	LIHC	male-bias	0.152725	8.45684	9.57881e-11	3.48559e-05	0.110344	1	X	102983199	GLRA4	5'UTR-opensea
cg14295696	LIHC	female-bias	-0.135978	-8.45151	9.74597e-11	3.54642e-05	-0.014171	1	X	135230717	FHL1	Body-shore
cg18520603	LIHC	male-bias	0.0976862	8.44991	9.79662e-11	3.56485e-05	0.0127311	1	X	142717164	SLITRK4	Body-opensea
cg14396739	LIHC	male-bias	0.0586241	8.44627	9.91326e-11	3.6073e-05	0.0125457	1	X	104465395	IL1RAPL2	Body-opensea
cg17388653	LIHC	male-bias	0.164092	8.44609	9.91901e-11	3.60939e-05	0.0420575	1	X	70331472	IL2RG	TSS200-opensea
cg21377007	LIHC	male-bias	0.143484	8.43195	1.03853e-10	3.77907e-05	0.116844	1	X	147060612		IGR-shelf
cg22010791	LIHC	male-bias	0.0709908	8.41786	1.08719e-10	3.95614e-05	0.0159018	1	X	31090296	FTHL17	TSS200-island
cg17073891	LIHC	male-bias	0.14466	8.3871	1.20161e-10	4.37249e-05	0.112005	1	X	133792876	PLAC1	TSS1500-opensea
cg13225177	LIHC	female-bias	-0.199467	-8.38631	1.20468e-10	4.38366e-05	-0.106764	1	X	136509076		IGR-shore
cg07198345	LIHC	male-bias	0.132041	8.38591	1.20627e-10	4.38943e-05	0.0749808	1	X	65382828	HEPH	Body-opensea
cg16497626	LIHC	male-bias	0.121394	8.38363	1.21523e-10	4.42205e-05	0.0783522	1	X	103031450	PLP1	1stExon-opensea
cg02055404	LIHC	female-bias	-0.191215	-8.37897	1.2338e-10	4.48963e-05	-0.0215236	1	X	82765593		IGR-island
cg01383228	LIHC	female-bias	-0.160413	-8.3686	1.27619e-10	4.64387e-05	-0.0852327	1	X	124336658		IGR-shore
cg00822942	LIHC	male-bias	0.126522	8.36342	1.29787e-10	4.72278e-05	0.0359103	1	X	54521170	FGD1	Body-shore
cg07001318	LIHC	male-bias	0.0927182	8.36019	1.31163e-10	4.77284e-05	0.0774142	1	X	45060034	CXorf36	1stExon-opensea
cg03761894	LIHC	female-bias	-0.173755	-8.35851	1.31882e-10	4.79901e-05	-0.0375075	1	X	71527796	CITED1	TSS1500-shore
cg17054449	LIHC	male-bias	0.125152	8.31362	1.52659e-10	5.55505e-05	0.0813159	1	X	118284808	KIAA1210	TSS1500-island
cg23846114	LIHC	male-bias	0.1415	8.27668	1.72217e-10	6.26673e-05	0.0638353	1	X	150867161	PRRG3	5'UTR-shelf
cg08577442	LIHC	female-bias	-0.187521	-8.26007	1.81816e-10	6.61605e-05	0.0571809	1	X	153712753	UBL4A	3'UTR-shore
cg11153610	LIHC	male-bias	0.155278	8.24314	1.92159e-10	6.99241e-05	0.108413	1	X	153069926	PDZD4	Body-island
cg04342295	LIHC	female-bias	-0.15758	-8.23914	1.94687e-10	7.08439e-05	-0.0361033	1	X	119125659		IGR-island
cg25499905	LIHC	male-bias	0.192411	8.23913	1.94694e-10	7.08462e-05	0.137429	1	X	129093272		IGR-shore
cg04768884	LIHC	male-bias	0.125151	8.23243	1.99007e-10	7.24158e-05	0.0652744	1	X	19443172	MAP3K15	Body-opensea
cg25250241	LIHC	male-bias	0.142028	8.22761	2.0217e-10	7.35667e-05	-0.0178092	1	X	103295154	MIR1256	Body-shore
cg17693270	LIHC	male-bias	0.197988	8.2218	2.06043e-10	7.49763e-05	0.13918	1	X	69397196	DGAT2L6	TSS200-opensea
cg24392532	LIHC	female-bias	-0.147184	-8.21516	2.10571e-10	7.66239e-05	-0.0304986	1	X	101975840	BHLHB9	5'UTR-opensea
cg21138857	LIHC	male-bias	0.128186	8.20892	2.14914e-10	7.82041e-05	0.103593	1	X	18240404	BEND2	TSS1500-shore
cg27441045	LIHC	female-bias	-0.131185	-8.19919	2.21863e-10	8.07329e-05	-0.0197926	1	X	100446383		IGR-island
cg05539388	LIHC	male-bias	0.104676	8.16294	2.49829e-10	9.09091e-05	0.089952	1	X	130676918	OR13H1	TSS1500-opensea
cg13770495	LIHC	male-bias	0.123801	8.14753	2.62763e-10	9.56159e-05	0.0273738	1	X	37404519		IGR-island
cg21327343	LIHC	female-bias	-0.249203	-8.1461	2.64e-10	9.60659e-05	-0.0627548	1	X	56258579	KLF8	TSS1500-shore
cg01370179	LIHC	female-bias	-0.122788	-8.12099	2.86659e-10	0.000104311	-0.0442277	1	X	153218937	HCFC1	Body-island
cg22911167	LIHC	male-bias	0.18948	8.11829	2.89205e-10	0.000105238	0.0609189	1	X	105452427	MUM1L1	3'UTR-opensea
cg19053608	LIHC	male-bias	0.174223	8.11166	2.95563e-10	0.000107551	0.121171	1	X	107182922		IGR-shelf
cg11307246	LIHC	male-bias	0.15969	8.10944	2.97726e-10	0.000108338	0.0654006	1	X	102319998	BEX1	TSS1500-shore
cg25606376	LIHC	male-bias	0.124313	8.10509	3.02002e-10	0.000109894	0.108126	1	X	15877305		IGR-shelf
cg11932249	LIHC	female-bias	-0.16787	-8.09858	3.08525e-10	0.000112268	-0.127725	1	X	71524953	CITED1	5'UTR-island
cg03757053	LIHC	male-bias	0.0634061	8.09731	3.09811e-10	0.000112736	0.0172944	1	X	30265185	MAGEB1	TSS200-island
cg14651210	LIHC	male-bias	0.117578	8.08415	3.23494e-10	0.000117715	0.01992	1	1	182586153		IGR-shore
cg07692215	LIHC	male-bias	0.0562911	8.0717	3.36996e-10	0.000122628	0.0309981	1	X	110867637		IGR-island
cg06131666	LIHC	male-bias	0.139323	8.06802	3.4109e-10	0.000124118	0.137283	1	X	18373515	SCML2	TSS1500-shore
cg17155263	LIHC	male-bias	0.125024	8.06287	3.46914e-10	0.000126237	-0.0126088	1	X	115594046	CXorf61	1stExon-opensea
cg08103876	LIHC	male-bias	0.190307	8.05892	3.5144e-10	0.000127884	0.0522892	1	X	75249519		IGR-island
cg10501443	LIHC	female-bias	-0.117102	-8.05521	3.55757e-10	0.000129455	0.0172734	1	X	114468791	LRCH2	TSS200-shore
cg14746118	LIHC	male-bias	0.214481	8.03499	3.80197e-10	0.000138349	0.097599	1	X	135569630	BRS3	TSS1500-opensea
cg10479063	LIHC	male-bias	0.198284	8.00234	4.23313e-10	0.000154038	0.0107322	1	12	9360933	PZP	1stExon-opensea
cg16786117	LIHC	male-bias	0.0623871	8.00078	4.25492e-10	0.00015483	0.0286253	1	X	65260820	VSIG4	TSS1500-opensea
cg22811030	LIHC	male-bias	0.0887361	7.9558	4.93414e-10	0.000179547	0.0552026	1	X	70128262	TEX11	5'UTR-opensea
cg04391849	LIHC	male-bias	0.159552	7.94742	5.07229e-10	0.000184573	-9.83106e-05	1	X	69282642	OTUD6A	1stExon-island
cg20220865	LIHC	male-bias	0.15852	7.94377	5.13366e-10	0.000186807	0.0685185	1	X	69454387	AWAT1	TSS200-opensea
cg15604615	LIHC	male-bias	0.13006	7.94008	5.19656e-10	0.000189096	0.0793856	1	X	150866552	PRRG3	TSS1500-shelf
cg05135252	LIHC	male-bias	0.165295	7.93765	5.23837e-10	0.000190617	0.00457947	1	16	85372478		IGR-opensea
cg21655480	LIHC	female-bias	-0.246801	-7.92402	5.4791e-10	0.000199377	0.00782446	1	X	21677052	KLHL34	TSS1500-island
cg01959381	LIHC	male-bias	0.062572	7.91892	5.57211e-10	0.000202761	0.05095	1	X	152583700		IGR-shore
cg21306973	LIHC	female-bias	-0.249497	-7.91763	5.59587e-10	0.000203626	-0.205433	1	X	139584886		IGR-shore
cg00328965	LIHC	female-bias	-0.107426	-7.88063	6.32247e-10	0.000230066	-0.0164323	1	X	129243062	ELF4	5'UTR-shore
cg17032587	LIHC	male-bias	0.174579	7.87276	6.4889e-10	0.000236122	0.0814237	1	X	150903247	CNGA2	1stExon-opensea
cg25972680	LIHC	male-bias	0.119115	7.8695	6.5593e-10	0.000238684	0.0862308	1	X	110489914	CAPN6	Body-opensea
cg16429758	LIHC	male-bias	0.130117	7.86159	6.73283e-10	0.000244998	0.108347	1	X	68755799		IGR-shelf
cg10443532	LIHC	female-bias	-0.237142	-7.85876	6.79601e-10	0.000247297	0.0319453	1	X	136657084		IGR-island
cg11459927	LIHC	male-bias	0.144635	7.85669	6.84278e-10	0.000248999	0.106835	1	X	118829969		IGR-shore
cg26351354	LIHC	male-bias	0.0398345	7.83785	7.28225e-10	0.000264991	0.0295214	1	X	53283877	IQSEC2	Body-island
cg25602651	LIHC	male-bias	0.160633	7.83219	7.41966e-10	0.000269991	0.144977	1	X	27999728	DCAF8L1	TSS200-opensea
cg26025203	LIHC	male-bias	0.109348	7.81225	7.92528e-10	0.00028839	0.00767571	1	X	124451563		IGR-shelf
cg20844384	LIHC	male-bias	0.118236	7.80815	8.03369e-10	0.000292335	-0.0071686	1	X	69282289	OTUD6A	TSS200-shore
cg18502642	LIHC	male-bias	0.151087	7.80487	8.12112e-10	0.000295516	0.106508	1	X	41328787	NYX	Body-shelf
cg00810883	LIHC	female-bias	-0.168552	-7.80004	8.25213e-10	0.000300284	-0.0924167	1	X	82763328	POU3F4	5'UTR-shore
cg15840970	LIHC	male-bias	0.0769987	7.7859	8.6474e-10	0.000314667	0.0412335	1	X	49160041	GAGE10	TSS200-opensea
cg13857811	LIHC	female-bias	-0.174103	-7.78174	8.76718e-10	0.000319026	0.0111522	1	X	70151209	SLC7A3	TSS1500-shore
cg03140487	LIHC	male-bias	0.0885096	7.77259	9.03684e-10	0.000328838	0.0830981	1	X	40027582	BCOR	5'UTR-island
cg25691526	LIHC	male-bias	0.192569	7.74472	9.91038e-10	0.000360625	0.0151315	1	X	130964707	LOC286467	TSS200-opensea
cg06539694	LIHC	female-bias	-0.129324	-7.74287	9.97156e-10	0.000362851	0.0298784	1	X	68348545		IGR-island
cg10142252	LIHC	female-bias	-0.15668	-7.72614	1.05397e-09	0.000383524	0.0106322	1	X	130192035	FLJ30058	TSS200-shore
cg21744850	LIHC	female-bias	-0.132982	-7.72374	1.0624e-09	0.000386594	-0.060221	1	X	50214878	DGKK	TSS1500-shore
cg21900692	LIHC	male-bias	0.167744	7.71085	1.10876e-09	0.000403461	0.033607	1	X	118285027	KIAA1210	TSS1500-island
cg04579507	LIHC	male-bias	0.138683	7.70929	1.11451e-09	0.000405555	0.0671541	1	12	21324585	SLCO1B1	Body-opensea
cg09728102	LIHC	male-bias	0.190813	7.70598	1.12681e-09	0.000410032	0.00125467	1	5	66124492	MAST4	TSS200-opensea
cg11390960	LIHC	female-bias	-0.11822	-7.69881	1.15392e-09	0.000419896	-0.105067	1	X	43517029	MAOA	Body-shore
cg06302218	LIHC	female-bias	-0.172982	-7.69818	1.15636e-09	0.000420782	-0.139015	1	X	102566123	BEX2	TSS200-shore
cg07749485	LIHC	female-bias	-0.226089	-7.69298	1.17647e-09	0.000428101	-0.0854969	1	X	119124509		IGR-island
cg02994237	LIHC	male-bias	0.237163	7.68832	1.19478e-09	0.000434764	0.0830976	1	X	137750892	FGF13	Body-opensea
cg07688234	LIHC	male-bias	0.184245	7.68448	1.21011e-09	0.000440343	0.118471	1	X	47489663	CFP	5'UTR-opensea
cg24755163	LIHC	female-bias	-0.223822	-7.67539	1.24718e-09	0.000453831	-0.122378	1	7	26416987		IGR-shore
cg13155805	LIHC	male-bias	0.12144	7.67475	1.24982e-09	0.000454793	0.0693556	1	X	150844888	PASD1	3'UTR-opensea
cg16064583	LIHC	male-bias	0.101694	7.6658	1.28748e-09	0.000468496	0.100882	1	X	129471056		IGR-shelf
cg22711601	LIHC	female-bias	-0.103598	-7.66387	1.29578e-09	0.000471515	-0.0446495	1	X	30670148	GK	TSS1500-shore
cg05215598	LIHC	male-bias	0.0883779	7.66382	1.29596e-09	0.000471583	0.0146197	1	X	129199609	ELF4	3'UTR-opensea
cg04335355	LIHC	male-bias	0.172618	7.65663	1.32728e-09	0.000482978	0.160246	1	X	44204116	EFHC2	TSS1500-shore
cg00600110	LIHC	male-bias	0.107988	7.65022	1.35582e-09	0.000493366	0.0418708	1	X	8769528	FAM9A	TSS200-island
cg02814558	LIHC	male-bias	0.113993	7.62577	1.47053e-09	0.000535106	0.0280397	1	X	150867810	PRRG3	Body-shelf
cg13656831	LIHC	female-bias	-0.179852	-7.60928	1.55333e-09	0.000565233	-0.0820896	1	4	682184	MFSD7	Body-shore
cg25873934	LIHC	female-bias	-0.142348	-7.60249	1.58879e-09	0.000578137	-0.0533906	1	X	11446095	ARHGAP6	Body-island
cg04227631	LIHC	male-bias	0.16754	7.60041	1.59981e-09	0.000582148	0.0908274	1	X	151562205	GABRA3	5'UTR-opensea
cg13569323	LIHC	male-bias	0.0707109	7.59989	1.60258e-09	0.000583156	0.0213545	1	X	152670598		IGR-shelf
cg11424273	LIHC	male-bias	0.111722	7.5884	1.66497e-09	0.00060586	0.108462	1	X	69668937	DLG3	Body-shelf
cg07885785	LIHC	female-bias	-0.142473	-7.58054	1.70904e-09	0.000621896	-0.101365	1	X	30591068	CXorf21	5'UTR-opensea
cg17474651	LIHC	male-bias	0.140653	7.57966	1.71406e-09	0.000623721	-0.00258391	1	X	140925194	MAGEC3	TSS1500-opensea
cg03088756	LIHC	male-bias	0.173165	7.57774	1.72506e-09	0.000627727	0.141125	1	X	40011385	BCOR	5'UTR-island
cg20593767	LIHC	male-bias	0.128919	7.5613	1.82198e-09	0.000662992	0.126133	1	X	100804036	ARMCX1	TSS1500-shelf
cg22810426	LIHC	male-bias	0.135566	7.54503	1.92334e-09	0.000699878	0.0630707	1	X	152801393	ATP2B3	TSS200-opensea
cg01912769	LIHC	male-bias	0.0766367	7.54348	1.93327e-09	0.00070349	0.0432236	1	X	152691117		IGR-shelf
cg08674227	LIHC	male-bias	0.143734	7.54083	1.95039e-09	0.000709721	0.139759	1	X	100186995		IGR-shelf
cg10779454	LIHC	male-bias	0.113693	7.53921	1.96096e-09	0.000713566	0.0187905	1	X	53312100	IQSEC2	Body-opensea
cg13896204	LIHC	female-bias	-0.161876	-7.53395	1.99561e-09	0.000726176	-0.069201	1	6	32729442	HLA-DQB2	Body-island
cg01856640	LIHC	male-bias	0.135468	7.52655	2.04534e-09	0.000744272	0.0503	1	X	153204066	RENBP	Body-shelf
cg14395423	LIHC	male-bias	0.152236	7.51756	2.10753e-09	0.000766902	0.145748	1	X	74516489	UPRT	Body-opensea
cg17560693	LIHC	male-bias	0.132213	7.50735	2.18039e-09	0.000793413	0.0394012	1	X	79269739	TBX22	TSS1500-opensea
cg01913196	LIHC	female-bias	-0.238312	-7.50161	2.22247e-09	0.000808726	-0.0957355	1	X	125687041	DCAF12L1	TSS200-shore
cg06428055	LIHC	female-bias	-0.204247	-7.49776	2.25117e-09	0.000819169	-0.0227668	1	X	129243872	ELF4	5'UTR-island
cg09569581	LIHC	female-bias	-0.115446	-7.49479	2.27355e-09	0.000827314	-0.110823	1	X	70444178	GJB1	Body-island
cg20396510	LIHC	male-bias	0.203108	7.49025	2.30825e-09	0.000839941	0.0859193	1	5	66124588	MAST4	TSS200-opensea
cg26011743	LIHC	male-bias	0.152331	7.48424	2.35494e-09	0.000856931	0.0177888	1	X	36794119		IGR-opensea
cg22970017	LIHC	female-bias	-0.209459	-7.47305	2.44436e-09	0.000889468	-0.0166322	1	X	140270501	LDOC1	1stExon-shore
cg23575644	LIHC	male-bias	0.147224	7.46355	2.52306e-09	0.000918104	-9.70941e-05	1	X	135424318	GPR112	Body-opensea
cg23717696	LIHC	female-bias	-0.0901224	-7.46346	2.52378e-09	0.000918366	-0.0500452	1	X	70521196	ITGB1BP2	TSS1500-opensea
cg10421691	LIHC	male-bias	0.0672937	7.45958	2.55664e-09	0.000930327	0.0476466	1	X	45241425		IGR-island
cg16928335	LIHC	male-bias	0.181407	7.45608	2.58662e-09	0.000941235	0.146987	1	X	123479823	SH2D1A	TSS1500-opensea
cg00625443	LIHC	female-bias	-0.169119	-7.43292	2.79433e-09	0.00101682	-0.108443	1	15	80997087	FAM108C1	Body-opensea
cg01138740	LIHC	male-bias	0.159334	7.43135	2.80907e-09	0.00102218	0.0644029	1	X	137946672	FGF13	5'UTR-opensea
cg07752550	LIHC	male-bias	0.125675	7.42024	2.91507e-09	0.00106075	0.0859711	1	X	35816656	MAGEB16	5'UTR-opensea
cg12239742	LIHC	female-bias	-0.162655	-7.41883	2.92889e-09	0.00106578	-0.0467301	1	X	18116923		IGR-opensea
cg13030797	LIHC	male-bias	0.0667371	7.39606	3.16012e-09	0.00114993	0.0375324	1	X	153403150		IGR-shore
cg24006341	LIHC	male-bias	0.0847009	7.37742	3.363e-09	0.00122375	0.052393	1	X	73524029	ZCCHC13	1stExon-island
cg22052586	LIHC	male-bias	0.0802356	7.37368	3.40528e-09	0.00123913	0.0469927	1	X	23018036	DDX53	TSS200-opensea
cg03991369	LIHC	male-bias	0.12301	7.37136	3.43171e-09	0.00124875	0.0725089	1	10	101181677	GOT1	Body-opensea
cg21672057	LIHC	female-bias	-0.195732	-7.35684	3.60235e-09	0.00131084	0.0185599	1	X	74144324	KIAA2022	5'UTR-island
cg26009591	LIHC	male-bias	0.164219	7.35599	3.61257e-09	0.00131456	0.101334	1	X	23017991	DDX53	TSS200-opensea
cg15365038	LIHC	female-bias	-0.153782	-7.35544	3.61915e-09	0.00131696	-0.0134478	1	X	48930360	PRAF2	Body-island
cg00908601	LIHC	male-bias	0.135055	7.31203	4.18431e-09	0.00152261	0.0945056	1	X	70323289	FOXO4	3'UTR-opensea
cg11530701	LIHC	male-bias	0.0926427	7.30823	4.23774e-09	0.00154206	0.0814652	1	X	11157610	ARHGAP6	Body-shore
cg27204474	LIHC	female-bias	-0.174899	-7.29952	4.36309e-09	0.00158767	-0.0428424	1	X	130191834	FLJ30058	TSS1500-shore
cg26283136	LIHC	male-bias	0.136574	7.29484	4.43181e-09	0.00161267	0.0610085	1	X	150944987		IGR-opensea
cg21784182	LIHC	male-bias	0.132862	7.29313	4.45727e-09	0.00162194	0.0857378	1	X	100354923	CENPI	1stExon-shore
cg16967668	LIHC	female-bias	-0.18884	-7.29168	4.47892e-09	0.00162982	-0.0839191	1	X	118824969	2024-09-06	Body-shore
cg02560273	LIHC	male-bias	0.0757598	7.28724	4.54602e-09	0.00165423	0.0719285	1	X	71371655	FLJ44635	Body-opensea
cg02395434	LIHC	female-bias	-0.222594	-7.28623	4.56133e-09	0.00165981	-0.156309	1	3	81604026	GBE1	Body-opensea
cg09344532	LIHC	male-bias	0.0529253	7.27167	4.78897e-09	0.00174264	0.0384363	1	X	124456912		IGR-shelf
cg20346189	LIHC	female-bias	-0.148669	-7.2667	4.86931e-09	0.00177187	-0.114927	1	X	71524766	CITED1	5'UTR-shore
cg06957108	LIHC	male-bias	0.088614	7.25218	5.11184e-09	0.00186013	-0.0126918	1	X	152082798	ZNF185	TSS200-opensea
cg20495737	LIHC	female-bias	-0.173572	-7.24963	5.15562e-09	0.00187606	0.0489265	1	X	48327768	SLC38A5	5'UTR-opensea
cg05131629	LIHC	male-bias	0.15063	7.24568	5.22427e-09	0.00190104	0.0516411	1	X	41307114	NYX	5'UTR-opensea
cg11019134	LIHC	male-bias	0.146351	7.23531	5.40872e-09	0.00196816	0.0785319	1	X	64772618		IGR-shore
cg22152887	LIHC	male-bias	0.144617	7.23251	5.45974e-09	0.00198672	0.0193937	1	11	72849944	FCHSD2	Body-shelf
cg14095733	LIHC	male-bias	0.173495	7.21814	5.72882e-09	0.00208464	0.0664983	1	X	27481558	SMEK3P	TSS200-opensea
cg12281614	LIHC	male-bias	0.0770906	7.19527	6.1849e-09	0.0022506	0.0350715	1	X	130678333	OR13H1	1stExon-opensea
cg18388301	LIHC	male-bias	0.0800257	7.18381	6.42713e-09	0.00233874	0.0254099	1	X	110867658		IGR-island
cg16510657	LIHC	female-bias	-0.217557	-7.17694	6.57681e-09	0.00239321	-0.0590647	1	X	100333950	TMEM35	1stExon-opensea
cg02890529	LIHC	male-bias	0.0580482	7.17659	6.58445e-09	0.00239599	0.0533636	1	X	70335118		IGR-shelf
cg07088622	LIHC	male-bias	0.0846468	7.17024	6.7261e-09	0.00244754	0.00523471	1	X	22290906	ZNF645	TSS200-opensea
cg16467811	LIHC	male-bias	0.134592	7.16384	6.87206e-09	0.00250065	0.122971	1	4	139832064		IGR-opensea
cg26697633	LIHC	male-bias	0.150062	7.16285	6.89479e-09	0.00250892	0.131832	1	X	85399112		IGR-shelf
cg05707218	LIHC	female-bias	-0.228683	-7.16082	6.94187e-09	0.00252605	-0.0123455	1	X	153234476	HCFC1	Body-shore
cg04001878	LIHC	male-bias	0.0934684	7.16066	6.94554e-09	0.00252739	0.0747785	1	X	69282170	OTUD6A	TSS200-shore
cg15042310	LIHC	male-bias	0.202744	7.155	7.07868e-09	0.00257583	0.142498	1	X	39948097	BCOR	5'UTR-shore
cg08729600	LIHC	male-bias	0.238996	7.14393	7.34632e-09	0.00267322	0.0362865	1	12	9360986	PZP	TSS200-opensea
cg02647042	LIHC	female-bias	-0.16505	-7.13976	7.44963e-09	0.00271082	-0.110855	1	X	135849065	ARHGEF6	Body-island
cg26598396	LIHC	female-bias	-0.164377	-7.1393	7.46114e-09	0.002715	-0.115188	1	X	136511135		IGR-shore
cg13677770	LIHC	male-bias	0.0826779	7.13233	7.63768e-09	0.00277924	0.0388202	1	X	12907574	TLR7	3'UTR-opensea
cg24156832	LIHC	male-bias	0.138027	7.11929	7.97922e-09	0.00290352	0.030594	1	X	152779629		IGR-shelf
cg01044189	LIHC	male-bias	0.0985619	7.11733	8.03175e-09	0.00292264	0.00760994	1	X	51137589		IGR-shore
cg02600772	LIHC	male-bias	0.165473	7.09836	8.55949e-09	0.00311468	-0.0374281	1	X	80259473		IGR-island
cg05397738	LIHC	male-bias	0.169488	7.09764	8.58035e-09	0.00312227	0.0174704	1	X	118369571	PGRMC1	TSS1500-shore
cg01651728	LIHC	male-bias	0.140564	7.09571	8.63614e-09	0.00314257	0.0362945	1	X	145076186	MIR890	TSS1500-opensea
cg19386336	LIHC	female-bias	-0.192331	-7.09173	8.75213e-09	0.00318478	0.000845191	1	X	100546064	TAF7L	Body-island
cg16355818	LIHC	male-bias	0.117677	7.07947	9.11986e-09	0.00331859	0.102835	1	X	110365847	PAK3	TSS1500-opensea
cg01522335	LIHC	male-bias	0.147816	7.0756	9.23912e-09	0.00336199	0.108656	1	X	50647118	LOC347376	TSS1500-opensea
cg13273147	LIHC	female-bias	-0.135538	-7.07193	9.35366e-09	0.00340367	-0.0977885	1	X	153192582	ARHGAP4	TSS1500-shore
cg18232722	LIHC	female-bias	-0.157372	-7.0661	9.53848e-09	0.00347092	-0.14258	1	X	102863013	TCEAL3	5'UTR-island
cg20940675	LIHC	female-bias	-0.252737	-7.05531	9.89026e-09	0.00359893	-0.0607836	1	1	229714785		IGR-opensea
cg19134404	LIHC	male-bias	0.0759371	7.04582	1.02105e-08	0.00371545	0.0668455	1	X	64771877		IGR-island
cg14073590	LIHC	female-bias	-0.0664155	-7.0349	1.05917e-08	0.00385417	-0.0645339	1	X	71526883	CITED1	TSS1500-island
cg24383344	LIHC	female-bias	-0.106425	-7.02866	1.08163e-08	0.0039359	-0.0377297	1	X	25020570		IGR-island
cg01706033	LIHC	female-bias	-0.0792253	-7.02034	1.11229e-08	0.00404747	0.0009463	1	X	102862807	TCEAL3	TSS200-island
cg05777690	LIHC	male-bias	0.100618	7.01752	1.12285e-08	0.00408591	0.0253102	1	X	106145701	CLDN2	5'UTR-opensea
cg18931873	LIHC	male-bias	0.0818758	6.99529	1.20994e-08	0.0044028	0.0205444	1	X	68001739		IGR-shore
cg22418103	LIHC	male-bias	0.0903504	6.99349	1.21728e-08	0.0044295	0.0314631	1	X	152742287		IGR-shore
cg13369656	LIHC	male-bias	0.141103	6.99309	1.2189e-08	0.00443542	0.0275238	1	X	151287089	MAGEA5	TSS1500-opensea
cg19688503	LIHC	male-bias	0.166067	6.98241	1.26345e-08	0.00459751	0.164808	1	X	110513941	CAPN6	TSS200-opensea
cg02362859	LIHC	male-bias	0.114932	6.97973	1.27491e-08	0.00463921	0.0265097	1	5	13473755		IGR-opensea
cg27054331	LIHC	female-bias	-0.137766	-6.97114	1.31223e-08	0.00477503	-0.127946	1	X	152910369	DUSP9	5'UTR-shore
cg21644660	LIHC	male-bias	0.14295	6.96251	1.35088e-08	0.00491567	0.105121	1	X	108865686		IGR-shelf
cg19721057	LIHC	female-bias	-0.214722	-6.95285	1.39546e-08	0.0050779	-0.121916	1	X	66788395	AR	TSS1500-opensea
cg10298992	LIHC	male-bias	0.183512	6.94431	1.4361e-08	0.00522576	0.021718	1	16	75103853	ZNRF1	Body-opensea
cg23238793	LIHC	female-bias	-0.108128	-6.94018	1.45618e-08	0.00529884	-0.0924881	1	X	25025519	ARX	Body-island
cg08744017	LIHC	male-bias	0.154698	6.93742	1.46978e-08	0.00534831	0.130807	1	X	19139038	GPR64	5'UTR-shore
cg20063650	LIHC	male-bias	0.128063	6.93589	1.47735e-08	0.00537585	-0.0166972	1	X	22290920	ZNF645	TSS200-opensea
cg14463725	LIHC	female-bias	-0.152834	-6.9347	1.48329e-08	0.00539747	-0.033283	1	X	118893647	ANKRD58	1stExon-shore
cg19651003	LIHC	female-bias	-0.175234	-6.93379	1.48779e-08	0.00541387	-0.0888436	1	19	583049	BSG	3'UTR-shore
cg03950166	LIHC	female-bias	-0.192343	-6.92202	1.54788e-08	0.00563251	-0.13065	1	15	80988613	FAM108C1	Body-island
cg06673178	LIHC	female-bias	-0.233881	-6.91491	1.58535e-08	0.00576887	0.00223416	1	X	50557022	SHROOM4	5'UTR-island
cg15659974	LIHC	male-bias	0.146975	6.91281	1.59659e-08	0.00580976	0.0250737	1	X	115567527	SLC6A14	TSS1500-opensea
cg04598760	LIHC	male-bias	0.0917037	6.89714	1.68302e-08	0.00612427	0.0485589	1	X	103083533	RAB9B	5'UTR-shelf
cg13492331	LIHC	male-bias	0.184342	6.89622	1.68826e-08	0.00614335	0.0430355	1	10	14779377	FAM107B	Body-opensea
cg23499779	LIHC	male-bias	0.182483	6.89362	1.70306e-08	0.0061972	-0.031789	1	12	76115849		IGR-opensea
cg23257934	LIHC	female-bias	-0.195426	-6.89235	1.71035e-08	0.00622371	-0.15763	1	1	234858982		IGR-opensea
cg04275947	LIHC	female-bias	-0.115649	-6.888	1.7356e-08	0.00631559	-0.0717616	1	16	31146682	PRSS8	Body-opensea
cg15843331	LIHC	female-bias	-0.145712	-6.8848	1.75436e-08	0.00638389	-0.0796704	1	11	61063144	VWCE	TSS1500-shore
cg04769935	LIHC	male-bias	0.063424	6.87077	1.8392e-08	0.0066926	0.0302003	1	X	45240706		IGR-shore
cg26297738	LIHC	female-bias	-0.161641	-6.86285	1.88886e-08	0.00687328	-0.0821763	1	X	139332682		IGR-opensea
cg13015245	LIHC	female-bias	-0.0840707	-6.8495	1.97566e-08	0.00718914	-0.0563733	1	X	130207604	FLJ30058	5'UTR-shore
cg04950711	LIHC	male-bias	0.114059	6.83843	2.05069e-08	0.00746216	0.0712225	1	X	151306718	MAGEA10	5'UTR-opensea
cg00825441	LIHC	female-bias	-0.16389	-6.83487	2.07541e-08	0.00755212	-0.111325	1	X	128789389	APLN	TSS1500-shore
cg21909660	LIHC	male-bias	0.154431	6.82501	2.14548e-08	0.00780709	0.0956663	1	X	100638850	BTK	5'UTR-opensea
cg03693842	LIHC	male-bias	0.133734	6.82084	2.17578e-08	0.00791737	0.108205	1	X	151620975	GABRA3	TSS1500-opensea
cg26872564	LIHC	male-bias	0.0880781	6.8198	2.18341e-08	0.00794514	0.00350935	1	X	152086636	ZNF185	Body-opensea
cg23245720	LIHC	female-bias	-0.211036	-6.81756	2.19999e-08	0.00800545	-0.161736	1	X	133680549	MGC16121	Body-island
cg25500196	LIHC	male-bias	0.110323	6.81257	2.23726e-08	0.00814109	0.100269	1	17	40464780		IGR-island
cg25524053	LIHC	male-bias	0.177829	6.8124	2.23856e-08	0.00814579	-0.0666992	1	X	40126867		IGR-shore
cg08073365	LIHC	male-bias	0.0850154	6.80431	2.30037e-08	0.00837073	0.0780593	1	X	135638873	VGLL1	3'UTR-opensea
cg01372422	LIHC	male-bias	0.124103	6.79936	2.339e-08	0.0085113	0.114004	1	X	19143476		IGR-shelf
cg01523865	LIHC	female-bias	-0.144724	-6.77451	2.54322e-08	0.00925444	-0.0453415	1	X	136651179	ZIC3	Body-island
cg03972560	LIHC	male-bias	0.190747	6.76784	2.60108e-08	0.00946496	0.0890615	1	X	17877110	RAI2	5'UTR-shore
cg00819012	LIHC	male-bias	0.0727669	6.7674	2.60489e-08	0.00947884	0.0438857	1	X	138291593		IGR-shelf
cg13226591	LIHC	male-bias	0.0528942	6.76623	2.61519e-08	0.00951632	-0.0292398	1	X	26156545	MAGEB18	5'UTR-opensea
cg00228620	LIHC	female-bias	-0.144172	-6.76126	2.65936e-08	0.00967706	-0.0630343	1	X	152782399		IGR-shore
cg26492304	LIHC	male-bias	0.0963876	6.75676	2.69996e-08	0.00982476	0.0780387	1	X	27999538	DCAF8L1	5'UTR-opensea
cg06711837	LIHC	female-bias	-0.228685	-6.74903	2.7712e-08	0.010084	-0.22316	1	X	137792814	FGF13	Body-shore
cg05929865	LIHC	male-bias	0.0878853	6.74589	2.80067e-08	0.0101913	0.0357155	1	X	70128121	TEX11	5'UTR-opensea
cg03748429	LIHC	female-bias	-0.1739	-6.74087	2.84847e-08	0.0103652	-0.132802	1	X	103500636	ESX1	TSS1500-shore
cg04428826	LIHC	female-bias	-0.143481	-6.73112	2.94363e-08	0.0107114	-0.0108344	1	X	75649367	MAGEE1	1stExon-island
cg13077247	LIHC	male-bias	0.10681	6.73085	2.94634e-08	0.0107213	0.0676826	1	X	103491910		IGR-shelf
cg24489686	LIHC	male-bias	0.151121	6.72945	2.9602e-08	0.0107718	0.0107622	1	X	137789932	FGF13	Body-shelf
cg03073000	LIHC	male-bias	0.174642	6.72945	2.96022e-08	0.0107718	0.00747304	1	X	130964931	LOC286467	TSS1500-opensea
cg04221167	LIHC	female-bias	-0.202867	-6.7285	2.96977e-08	0.0108066	-0.0232422	1	X	109683163	AMMECR1	1stExon-opensea
cg25258879	LIHC	female-bias	-0.176167	-6.72289	3.02642e-08	0.0110127	0.0227415	1	X	49022996	MAGIX	3'UTR-island
cg24822127	LIHC	male-bias	0.177747	6.71039	3.15661e-08	0.0114865	0.0446897	1	X	150884331	FATE1	TSS200-opensea
cg16884539	LIHC	male-bias	0.0278325	6.70932	3.16799e-08	0.0115279	-0.0142834	1	X	114425148	RBMXL3	1stExon-island
cg04593531	LIHC	male-bias	0.124832	6.70721	3.19064e-08	0.0116103	0.0854068	1	X	137700748	LOC158696	TSS1500-opensea
cg15888279	LIHC	female-bias	-0.18928	-6.68756	3.40911e-08	0.0124053	-0.0303763	1	X	30327778	NR0B1	TSS1500-shore
cg02804757	LIHC	female-bias	-0.174421	-6.68544	3.43359e-08	0.0124944	-0.143366	1	X	138285861	FGF13	5'UTR-shore
cg22539189	LIHC	male-bias	0.103638	6.6844	3.44565e-08	0.0125382	0.0457823	1	X	2746420	GYG2	TSS1500-shore
cg11244095	LIHC	male-bias	0.104559	6.6712	3.60246e-08	0.0131089	0.0331555	1	X	135382675	GPR112	TSS1500-island
cg26551791	LIHC	male-bias	0.187623	6.66838	3.63695e-08	0.0132343	0.0819474	1	X	145076879	MIR888	TSS1500-opensea
cg01545419	LIHC	male-bias	0.0470287	6.66558	3.67138e-08	0.0133596	0.0364195	1	X	30265447	MAGEB1	5'UTR-island
cg20129827	LIHC	male-bias	0.129048	6.66478	3.68134e-08	0.0133959	0.109369	1	X	118284659	KIAA1210	TSS200-island
cg02477838	LIHC	female-bias	-0.181192	-6.66	3.74112e-08	0.0136134	-0.0595626	1	6	1136654		IGR-opensea
cg05361475	LIHC	male-bias	0.123973	6.65697	3.77958e-08	0.0137534	0.0139729	1	X	74744538	ZDHHC15	TSS1500-shore
cg04488527	LIHC	male-bias	0.112485	6.65338	3.82558e-08	0.0139208	0.0535557	1	X	21675867	KLHL34	1stExon-island
cg03934360	LIHC	male-bias	0.174049	6.64315	3.95986e-08	0.0144094	0.0201202	1	X	117859585		IGR-shore
cg01594949	LIHC	male-bias	0.1224	6.62911	4.15182e-08	0.0151079	0.0735958	1	9	140197890	NRARP	TSS1500-shore
cg13367883	LIHC	female-bias	-0.112553	-6.62703	4.18114e-08	0.0152146	-0.0444583	1	X	53350895	IQSEC2	TSS1500-shore
cg01498090	LIHC	male-bias	0.112552	6.61584	4.34195e-08	0.0157997	0.0660935	1	X	12885115	TLR7	TSS200-opensea
cg10622174	LIHC	male-bias	0.136849	6.60934	4.43819e-08	0.01615	0.116809	1	6	3884445		IGR-opensea
cg06476341	LIHC	female-bias	-0.0607126	-6.59624	4.63861e-08	0.0168792	0.0197777	1	X	144903005	SLITRK2	TSS200-island
cg25530944	LIHC	male-bias	0.148712	6.59591	4.6438e-08	0.0168981	0.00532893	1	X	130964695	LOC286467	TSS200-opensea
cg10084932	LIHC	male-bias	0.0989035	6.58986	4.7396e-08	0.0172467	0.0116932	1	X	134571153		IGR-island
cg14408412	LIHC	male-bias	0.146452	6.58985	4.73978e-08	0.0172474	-0.0881515	1	7	111776496	DOCK4	Body-opensea
cg11475880	LIHC	male-bias	0.0453385	6.56533	5.14841e-08	0.0187343	0.0295925	1	X	53283947	IQSEC2	Body-island
cg07115626	LIHC	male-bias	0.147289	6.56518	5.15118e-08	0.0187444	0.111983	1	14	38071285		IGR-shelf
cg21908878	LIHC	male-bias	0.135951	6.55495	5.33207e-08	0.0194027	0.0425384	1	X	23017887	DDX53	TSS200-opensea
cg17156570	LIHC	female-bias	-0.138266	-6.55396	5.34982e-08	0.0194673	-0.137654	1	X	139592377		IGR-shore
cg05085049	LIHC	female-bias	-0.17854	-6.54743	5.469e-08	0.0199009	-0.161643	1	X	152909992	DUSP9	5'UTR-island
cg12594780	LIHC	male-bias	0.121773	6.54736	5.47029e-08	0.0199056	0.0941917	1	X	134134222		IGR-shelf
cg10479992	LIHC	male-bias	0.074559	6.54149	5.57982e-08	0.0203042	0.0732514	1	X	50652739	BMP15	TSS1500-opensea
cg18110168	LIHC	female-bias	-0.208607	-6.53784	5.6489e-08	0.0205556	0.0618248	1	X	50557055	SHROOM4	TSS200-island
cg13933535	LIHC	male-bias	0.155488	6.53002	5.79998e-08	0.0211053	0.113808	1	X	96795331	DIAPH2	Body-opensea
cg11315492	LIHC	male-bias	0.137207	6.52838	5.83217e-08	0.0212225	0.0597909	1	X	11153539		IGR-shelf
cg01872593	LIHC	male-bias	0.27391	6.5221	5.957e-08	0.0216767	0.0657641	1	14	54446260		IGR-opensea
cg13861342	LIHC	female-bias	-0.146827	-6.50872	6.23217e-08	0.022678	-0.0172607	1	X	39473901		IGR-shore
cg19779655	LIHC	male-bias	0.105439	6.50619	6.28568e-08	0.0228727	0.103708	1	X	118010802		IGR-shelf
cg17880050	LIHC	female-bias	-0.173841	-6.4975	6.47261e-08	0.0235529	-0.140897	1	7	26416735		IGR-island
cg03892157	LIHC	male-bias	0.0580817	6.49286	6.57494e-08	0.0239253	0.0269673	1	X	153399967		IGR-shelf
cg19594052	LIHC	male-bias	0.145407	6.49024	6.63328e-08	0.0241376	0.019094	1	7	26437002		IGR-shore
cg13248004	LIHC	male-bias	0.139945	6.48012	6.86359e-08	0.0249756	0.0808416	1	X	100548043	TAF7L	5'UTR-shore
cg11186522	LIHC	male-bias	0.148864	6.47844	6.90284e-08	0.0251185	0.0440573	1	X	137821411	FGF13	Body-opensea
cg04544498	LIHC	female-bias	-0.250772	-6.47549	6.97177e-08	0.0253693	-0.167597	1	X	75647859	MAGEE1	TSS1500-shore
cg26498015	LIHC	male-bias	0.117074	6.47126	7.07195e-08	0.0257338	0.0636855	1	X	66788089	AR	TSS1500-opensea
cg10786329	LIHC	female-bias	-0.104676	-6.4707	7.08532e-08	0.0257825	-0.0288919	1	X	119125722		IGR-shore
cg20051589	LIHC	female-bias	-0.141671	-6.45212	7.54413e-08	0.027452	-0.0847459	1	X	69664482	DLG3	TSS1500-shore
cg03283421	LIHC	female-bias	-0.232864	-6.44695	7.67686e-08	0.027935	-0.190933	1	10	124610984	FAM24B	5'UTR-opensea
cg23628411	LIHC	female-bias	-0.0919582	-6.44239	7.79584e-08	0.028368	-0.0234204	1	X	103218066	TMSB15B	5'UTR-shore
cg20086219	LIHC	female-bias	-0.167897	-6.43646	7.9534e-08	0.0289413	0.020227	1	4	105982613		IGR-opensea
cg04428163	LIHC	male-bias	0.124463	6.4349	7.99557e-08	0.0290947	0.032976	1	20	1294021	SDCBP2	1stExon-island
cg27050407	LIHC	female-bias	-0.149125	-6.43445	8.00765e-08	0.0291387	-0.0356899	1	6	24832728	FAM65B	Body-opensea
cg16262392	LIHC	male-bias	0.0740321	6.42986	8.13277e-08	0.029594	0.0375845	1	1	153932122	SLC39A1	3'UTR-shore
cg22437699	LIHC	male-bias	0.142459	6.42345	8.31073e-08	0.0302416	0.135538	1	X	25033358	ARX	Body-shore
cg13965132	LIHC	male-bias	0.102512	6.42164	8.36148e-08	0.0304263	0.0360724	1	X	2924465	ARSH	TSS200-opensea
cg07146718	LIHC	male-bias	0.175606	6.42098	8.3801e-08	0.030494	-0.00914334	1	X	137820752	FGF13	Body-opensea
cg05245722	LIHC	female-bias	-0.0558937	-6.42072	8.38742e-08	0.0305206	-0.024689	1	X	92929190	FAM133A	1stExon-shore
cg01882566	LIHC	female-bias	-0.12015	-6.41686	8.4976e-08	0.0309216	-0.0875954	1	X	38187196	RPGR	TSS1500-shore
cg04515986	LIHC	male-bias	0.136753	6.40691	8.78791e-08	0.031978	0.0443179	1	X	31089692	FTHL17	1stExon-shore
cg08729658	LIHC	female-bias	-0.149365	-6.40163	8.9458e-08	0.0325525	0.0366055	1	X	17674676	NHS	Body-shore
cg24817502	LIHC	male-bias	0.132156	6.40163	8.94596e-08	0.0325531	0.0202335	1	X	108868931	KCNE1L	TSS1500-shore
cg21585138	LIHC	male-bias	0.208695	6.40029	8.98646e-08	0.0327005	0.0528688	1	3	50645106	CISH	Body-shelf
cg26644504	LIHC	male-bias	0.0600094	6.39531	9.13879e-08	0.0332548	0.00606705	1	X	108869644	KCNE1L	TSS1500-shore
cg02352295	LIHC	male-bias	0.171438	6.38374	9.50285e-08	0.0345795	0.106513	1	X	144901807	SLITRK2	TSS1500-shore
cg13275322	LIHC	male-bias	0.122101	6.38213	9.55461e-08	0.0347679	0.0794264	1	X	48541820	WAS	TSS1500-opensea
cg00620602	LIHC	male-bias	0.042168	6.37985	9.62827e-08	0.0350359	-0.0070016	1	X	152162559		IGR-island
cg24774564	LIHC	male-bias	0.138181	6.37813	9.68433e-08	0.0352399	0.068609	1	X	37352866		IGR-shore
cg13661446	LIHC	male-bias	0.107684	6.37556	9.76868e-08	0.0355468	0.0407115	1	X	151093031	MAGEA4	Body-opensea
cg22143274	LIHC	male-bias	0.0667749	6.3634	1.01781e-07	0.0370369	0.0624969	1	5	51339709		IGR-opensea
cg02514307	LIHC	male-bias	0.115842	6.36167	1.02377e-07	0.0372536	0.0779205	1	X	148716330		IGR-shelf
cg17830714	LIHC	female-bias	-0.171714	-6.34147	1.09602e-07	0.0398827	-0.0505545	1	X	153630330	DNASE1L1	3'UTR-shelf
cg00206332	LIHC	male-bias	0.147647	6.32874	1.14418e-07	0.041635	0.0170057	1	X	151140984	GABRE	Body-shore
cg18418803	LIHC	male-bias	0.117078	6.3278	1.14781e-07	0.0417673	0.0124892	1	X	27825984	MAGEB10	TSS200-opensea
cg06625174	LIHC	male-bias	0.129907	6.31859	1.18406e-07	0.0430863	-0.0674736	1	X	153979792	GAB3	TSS1500-shore
cg17354708	LIHC	female-bias	-0.0440846	-6.31776	1.18738e-07	0.0432071	-0.0144621	1	X	71793175	HDAC8	TSS1500-opensea
cg00614938	LIHC	male-bias	0.0975287	6.30842	1.22542e-07	0.0445912	0.0600303	1	X	108717536	GUCY2F	Body-opensea
cg00781047	LIHC	female-bias	-0.0843722	-6.30625	1.23443e-07	0.044919	-0.0344655	1	X	17653183	NHS	TSS1500-opensea
cg14186071	LIHC	male-bias	0.0535182	6.29907	1.2647e-07	0.0460205	0.0429748	1	X	30993102		IGR-opensea
cg13030539	LIHC	male-bias	0.0517152	6.29711	1.27311e-07	0.0463267	0.0361915	1	X	55290965	PAGE3	5'UTR-opensea
cg18015266	LIHC	male-bias	0.0673528	6.29297	1.29101e-07	0.046978	0.0245916	1	X	48644759	GATA1	TSS1500-opensea
cg07413956	LIHC	male-bias	0.104573	6.29201	1.2952e-07	0.0471305	0.102155	1	X	55101460	PAGE2B	TSS200-opensea
cg18525817	LIHC	male-bias	0.139884	6.28767	1.31432e-07	0.0478264	0.049371	1	X	107977374	IRS4	1stExon-shore
cg26046924	LIHC	male-bias	0.113599	6.27599	1.36717e-07	0.0497495	0.0489347	1	X	63616811	MTMR8	TSS1500-shore
cg23352597	LUAD	female-bias	-0.279179	-22.8474	1.36029e-18	5.07522e-13	-0.0317282	1	X	46435742	CHST7	3'UTR-shore
cg08586423	LUAD	female-bias	-0.293622	-21.3065	7.49918e-18	2.79793e-12	-6.67492e-05	1	X	102508853	TCEAL8	Body-opensea
cg08062822	LUAD	female-bias	-0.231085	-21.2066	8.40941e-18	3.13754e-12	0.0305932	1	X	103356845	MCART6	5'UTR-shore
cg03121419	LUAD	male-bias	0.253231	18.9551	1.27182e-16	4.74513e-11	0.0116141	1	X	125687720	DCAF12L1	TSS1500-shore
cg24254925	LUAD	female-bias	-0.288461	-18.0647	4.02821e-16	1.50292e-10	-0.0631677	1	X	129065051		IGR-shore
cg00188257	LUAD	male-bias	0.206597	17.5111	8.45738e-16	3.15543e-10	0.0459382	1	X	34677877		IGR-shelf
cg11166197	LUAD	male-bias	0.265927	17.0642	1.56214e-15	5.82833e-10	0.0978609	1	X	151561584	GABRA3	5'UTR-opensea
cg18498622	LUAD	male-bias	0.310128	16.8484	2.11104e-15	7.87625e-10	0.130208	1	X	151810246	GABRQ	Body-shelf
cg26918720	LUAD	female-bias	-0.284167	-16.6896	2.63993e-15	9.84954e-10	-0.0950452	1	X	153191884	ARHGAP4	TSS200-shore
cg04342295	LUAD	female-bias	-0.250492	-16.4732	3.59106e-15	1.33982e-09	-0.0361832	1	X	119125659		IGR-island
cg27551771	LUAD	male-bias	0.17533	16.4546	3.68818e-15	1.37605e-09	0.141633	1	X	118213543	KIAA1210	3'UTR-opensea
cg10440516	LUAD	male-bias	0.197686	16.4482	3.72199e-15	1.38867e-09	0.125176	1	X	103356134	MCART6	5'UTR-shore
cg10602162	LUAD	female-bias	-0.247002	-16.406	3.95373e-15	1.47513e-09	0.00710632	1	X	153671800	GDI1	3'UTR-shore
cg01847754	LUAD	male-bias	0.227514	16.05	6.6194e-15	2.46968e-09	0.0844905	1	X	144909347	CXorf1	1stExon-opensea
cg23171231	LUAD	male-bias	0.16923	16.0438	6.67971e-15	2.49219e-09	-0.0252199	1	X	11672048	ARHGAP6	Body-opensea
cg24707688	LUAD	female-bias	-0.350794	-15.9575	7.57966e-15	2.82796e-09	-0.0707693	1	X	101397542	TCEAL6	TSS200-shore
cg20981089	LUAD	female-bias	-0.232237	-15.9407	7.76928e-15	2.8987e-09	-0.0569013	1	X	139588759		IGR-shore
cg11331191	LUAD	male-bias	0.228231	15.8716	8.60039e-15	3.20879e-09	0.0361121	1	X	63446644	ASB12	TSS1500-opensea
cg12976310	LUAD	male-bias	0.246247	15.8207	9.2717e-15	3.45925e-09	0.104507	1	X	113865129	SNORA35	TSS200-opensea
cg12467143	LUAD	female-bias	-0.232232	-15.7414	1.04273e-14	3.89039e-09	-0.00300272	1	X	11684543	ARHGAP6	TSS1500-island
cg14686949	LUAD	male-bias	0.230099	15.7357	1.0516e-14	3.92351e-09	0.115946	1	X	151129081	GABRE	Body-opensea
cg18392465	LUAD	male-bias	0.115181	15.6188	1.2516e-14	4.6697e-09	0.106407	1	X	65043187		IGR-shore
cg20569128	LUAD	female-bias	-0.232801	-15.3741	1.80798e-14	6.74553e-09	-0.0349807	1	X	136656575		IGR-island
cg17032587	LUAD	male-bias	0.238175	15.0961	2.76231e-14	1.03061e-08	0.0591785	1	X	150903247	CNGA2	1stExon-opensea
cg09791535	LUAD	male-bias	0.251876	15.0852	2.80889e-14	1.04799e-08	0.155143	1	X	132435532	GPC4	3'UTR-opensea
cg25873934	LUAD	female-bias	-0.24869	-15.0485	2.97188e-14	1.1088e-08	-0.116896	1	X	11446095	ARHGAP6	Body-island
cg08704539	LUAD	female-bias	-0.222659	-14.9692	3.35861e-14	1.25309e-08	-0.10634	1	X	100546356	TAF7L	Body-island
cg20291321	LUAD	female-bias	-0.220413	-14.7893	4.44174e-14	1.6572e-08	-0.157412	1	X	36981602		IGR-island
cg10127415	LUAD	male-bias	0.207366	14.6456	5.56341e-14	2.0757e-08	0.0818766	1	X	26210523	MAGEB6	TSS200-opensea
cg01970554	LUAD	female-bias	-0.190874	-14.6216	5.77811e-14	2.1558e-08	-0.0658241	1	X	50212323	DGKK	Body-shore
cg27087885	LUAD	male-bias	0.157865	14.609	5.89424e-14	2.19913e-08	0.0909245	1	X	15683977	TMEM27	TSS1500-opensea
cg05532403	LUAD	female-bias	-0.259206	-14.5917	6.05692e-14	2.25983e-08	-0.0712342	1	X	15756920	CA5B	5'UTR-shore
cg06231618	LUAD	female-bias	-0.329014	-14.5311	6.66617e-14	2.48713e-08	-0.225385	1	X	40504059	CXorf38	Body-shelf
cg03832506	LUAD	male-bias	0.153997	14.3834	8.42932e-14	3.14496e-08	0.0626869	1	X	53286187	IQSEC2	Body-shelf
cg11179997	LUAD	female-bias	-0.232288	-14.2667	1.0161e-13	3.79104e-08	-0.0470726	1	X	119125670		IGR-island
cg04069419	LUAD	female-bias	-0.231184	-14.2568	1.0325e-13	3.85223e-08	-0.124364	1	X	151619939	GABRA3	TSS200-opensea
cg04593531	LUAD	male-bias	0.17356	14.2472	1.04855e-13	3.91211e-08	0.0852045	1	X	137700748	LOC158696	TSS1500-opensea
cg13219667	LUAD	female-bias	-0.254073	-14.2456	1.05114e-13	3.92179e-08	-0.0425725	1	X	153671953	FAM50A	TSS1500-shore
cg22618086	LUAD	female-bias	-0.339579	-14.1951	1.14033e-13	4.25455e-08	-0.117106	1	X	11446101	ARHGAP6	Body-island
cg02055404	LUAD	female-bias	-0.218972	-14.141	1.24443e-13	4.64294e-08	-0.0942798	1	X	82765593		IGR-island
cg06791102	LUAD	female-bias	-0.302612	-14.0185	1.518e-13	5.66362e-08	-0.0729027	1	X	153191600	ARHGAP4	1stExon-island
cg11442732	LUAD	female-bias	-0.238986	-13.9137	1.80155e-13	6.72155e-08	-0.102116	1	X	133118088	GPC3	Body-island
cg19997062	LUAD	female-bias	-0.163432	-13.878	1.90994e-13	7.12595e-08	-0.0855118	1	X	144900177	SLITRK2	5'UTR-island
cg00960300	LUAD	male-bias	0.189207	13.8627	1.95846e-13	7.30697e-08	0.0741415	1	X	70886827	BCYRN1	Body-shore
cg05867448	LUAD	female-bias	-0.262323	-13.7619	2.31254e-13	8.62806e-08	-0.150066	1	X	130192575	FLJ30058	5'UTR-island
cg10794473	LUAD	male-bias	0.156208	13.6881	2.61288e-13	9.74861e-08	0.140353	1	X	63006350	MIR1468	TSS1500-opensea
cg19900558	LUAD	female-bias	-0.355418	-13.6218	2.917e-13	1.08833e-07	-0.0500701	1	X	152991641	BCAP31	TSS1500-island
cg00158454	LUAD	female-bias	-0.304253	-13.6041	3.0042e-13	1.12086e-07	0.0187092	1	X	136509526		IGR-island
cg08814148	LUAD	female-bias	-0.23545	-13.5914	3.0688e-13	1.14496e-07	-0.154149	1	X	118407645		IGR-island
cg02416822	LUAD	male-bias	0.22417	13.5886	3.0833e-13	1.15037e-07	0.12696	1	X	136112268		IGR-shore
cg04730443	LUAD	male-bias	0.171655	13.4829	3.67949e-13	1.37281e-07	-0.000848512	1	X	26210529	MAGEB6	TSS200-opensea
cg10423328	LUAD	male-bias	0.179506	13.4704	3.75762e-13	1.40196e-07	0.0986814	1	X	84364131	SATL1	TSS200-opensea
cg09789426	LUAD	female-bias	-0.238203	-13.4318	4.00917e-13	1.49581e-07	-0.0635995	1	X	102000698	BHLHB9	5'UTR-island
cg17274142	LUAD	male-bias	0.147227	13.3717	4.43696e-13	1.65542e-07	0.0482303	1	X	135385255	GPR112	5'UTR-shelf
cg19974994	LUAD	male-bias	0.208396	13.3246	4.80476e-13	1.79265e-07	-0.0461589	1	X	115594157	CXorf61	TSS200-opensea
cg04227631	LUAD	male-bias	0.254583	13.2592	5.36807e-13	2.00282e-07	0.151104	1	X	151562205	GABRA3	5'UTR-opensea
cg10089642	LUAD	male-bias	0.154875	13.2467	5.48326e-13	2.04579e-07	0.0833347	1	X	122870376		IGR-shelf
cg10208654	LUAD	female-bias	-0.292379	-13.2434	5.51429e-13	2.05737e-07	-0.0665312	1	X	135230613	FHL1	Body-shore
cg22820312	LUAD	female-bias	-0.178678	-13.1985	5.95272e-13	2.22095e-07	-0.0344389	1	X	25030326	ARX	Body-shore
cg17560693	LUAD	male-bias	0.209077	13.1164	6.84968e-13	2.5556e-07	0.0309765	1	X	79269739	TBX22	TSS1500-opensea
cg18155062	LUAD	female-bias	-0.228702	-13.1049	6.98551e-13	2.60628e-07	-0.0918331	1	X	24665469	PCYT1B	TSS200-opensea
cg19227523	LUAD	male-bias	0.209837	13.0706	7.40973e-13	2.76456e-07	0.037037	1	X	128872002	XPNPEP2	TSS1500-opensea
cg00810883	LUAD	female-bias	-0.185849	-13.0494	7.68421e-13	2.86696e-07	-0.0859561	1	X	82763328	POU3F4	5'UTR-shore
cg12976380	LUAD	female-bias	-0.257581	-12.9914	8.49152e-13	3.16817e-07	-0.0563485	1	X	139846499		IGR-shore
cg23499980	LUAD	female-bias	-0.146373	-12.8963	1.00104e-12	3.73487e-07	0.0301679	1	X	122319148	GRIA3	Body-island
cg05975021	LUAD	male-bias	0.171519	12.8802	1.02941e-12	3.84069e-07	3.59897e-05	1	X	11310708	ARHGAP6	Body-opensea
cg03450733	LUAD	female-bias	-0.272868	-12.8709	1.04618e-12	3.90327e-07	-0.115175	1	X	25024314	ARX	Body-shore
cg01490258	LUAD	male-bias	0.229909	12.8519	1.08146e-12	4.03492e-07	0.142936	1	X	40030456	BCOR	5'UTR-shore
cg24995836	LUAD	female-bias	-0.284742	-12.7882	1.20826e-12	4.50798e-07	-0.109933	1	X	151619390	GABRA3	5'UTR-opensea
cg26968501	LUAD	female-bias	-0.186622	-12.788	1.20871e-12	4.50968e-07	-0.122653	1	X	82765734		IGR-island
cg23092775	LUAD	male-bias	0.225588	12.7431	1.30754e-12	4.87841e-07	0.155915	1	X	117857613		IGR-shelf
cg02352295	LUAD	male-bias	0.19772	12.7224	1.35582e-12	5.05853e-07	0.0910352	1	X	144901807	SLITRK2	TSS1500-shore
cg17075998	LUAD	female-bias	-0.187467	-12.7195	1.3627e-12	5.0842e-07	-0.0695794	1	X	40104353		IGR-opensea
cg26363802	LUAD	female-bias	-0.183807	-12.6982	1.41467e-12	5.27811e-07	-0.102909	1	X	153250812		IGR-shelf
cg02725485	LUAD	male-bias	0.165564	12.6932	1.4271e-12	5.3245e-07	0.0631318	1	X	30577300	CXorf21	3'UTR-opensea
cg03598440	LUAD	female-bias	-0.23139	-12.6928	1.4279e-12	5.32748e-07	-0.0277209	1	X	99663330	PCDH19	1stExon-island
cg03035653	LUAD	female-bias	-0.234127	-12.6913	1.43174e-12	5.34178e-07	-0.0419708	1	X	99662932	PCDH19	1stExon-island
cg09483847	LUAD	male-bias	0.173389	12.6772	1.46778e-12	5.47627e-07	0.112563	1	X	21960827	SMS	Body-shore
cg14343151	LUAD	female-bias	-0.159615	-12.5942	1.69869e-12	6.33777e-07	-0.0694672	1	X	99667001		IGR-island
cg03577944	LUAD	female-bias	-0.228046	-12.5893	1.71341e-12	6.39269e-07	-0.0413911	1	X	106694654		IGR-shore
cg06293983	LUAD	female-bias	-0.236949	-12.4174	2.32515e-12	8.67509e-07	-0.0497785	1	X	135863104	ARHGEF6	5'UTR-opensea
cg02193580	LUAD	female-bias	-0.223464	-12.4097	2.35704e-12	8.79406e-07	-0.0619399	1	X	135251444	FHL1	TSS200-opensea
cg20051589	LUAD	female-bias	-0.16949	-12.4023	2.38825e-12	8.9105e-07	-0.0278144	1	X	69664482	DLG3	TSS1500-shore
cg19386336	LUAD	female-bias	-0.249389	-12.3635	2.5599e-12	9.55092e-07	-0.154509	1	X	100546064	TAF7L	Body-island
cg00723997	LUAD	female-bias	-0.243103	-12.3538	2.60471e-12	9.71812e-07	-0.129202	1	X	48690473	PCSK1N	Body-island
cg25052176	LUAD	female-bias	-0.302076	-12.3511	2.61745e-12	9.76566e-07	-0.128534	1	X	54385662	WNK3	TSS1500-shore
cg20201673	LUAD	female-bias	-0.139539	-12.2398	3.19678e-12	1.19271e-06	-0.136785	1	X	130206879	FLJ30058	5'UTR-shore
cg21912308	LUAD	female-bias	-0.273491	-12.204	3.41037e-12	1.2724e-06	-0.0229685	1	X	48929987	PRAF2	Body-island
cg27496085	LUAD	female-bias	-0.234563	-12.1861	3.52259e-12	1.31427e-06	-0.079394	1	X	153152572		IGR-shore
cg01558501	LUAD	female-bias	-0.202794	-12.101	4.10988e-12	1.53339e-06	-0.125379	1	X	99667223		IGR-island
cg14605748	LUAD	male-bias	0.158276	12.0791	4.27689e-12	1.5957e-06	0.117089	1	X	112066508	AMOT	TSS200-opensea
cg13806616	LUAD	female-bias	-0.168133	-12.0125	4.82932e-12	1.80181e-06	-0.0615067	1	X	25033767	ARX	1stExon-island
cg00673685	LUAD	male-bias	0.236837	12.0106	4.8463e-12	1.80814e-06	0.0798638	1	X	111699191	ZCCHC16	3'UTR-opensea
cg15259889	LUAD	female-bias	-0.260437	-12.0089	4.8613e-12	1.81374e-06	-0.114913	1	X	24665506	PCYT1B	TSS200-opensea
cg00235887	LUAD	male-bias	0.166985	11.9989	4.9511e-12	1.84725e-06	0.0440177	1	X	9430465	TBL1X	TSS1500-shelf
cg16328412	LUAD	female-bias	-0.229927	-11.9914	5.01908e-12	1.87261e-06	-0.0749677	1	X	130423458	IGSF1	TSS200-opensea
cg20950932	LUAD	female-bias	-0.227346	-11.9823	5.10374e-12	1.9042e-06	-0.0723558	1	X	122317633	GRIA3	TSS1500-shore
cg18434680	LUAD	male-bias	0.198411	11.938	5.53527e-12	2.0652e-06	0.144455	1	X	102983366	GLRA4	5'UTR-opensea
cg10474871	LUAD	male-bias	0.24627	11.9261	5.65774e-12	2.11089e-06	0.155626	1	X	103815487	IL1RAPL2	5'UTR-shelf
cg12914043	LUAD	female-bias	-0.10544	-11.9099	5.82789e-12	2.17438e-06	-0.0873827	1	X	144899415	SLITRK2	1stExon-island
cg07673466	LUAD	female-bias	-0.2309	-11.9049	5.88169e-12	2.19445e-06	0.000225033	1	X	70363469	NLGN3	TSS1500-opensea
cg20593767	LUAD	male-bias	0.132298	11.8639	6.34327e-12	2.36666e-06	0.0562795	1	X	100804036	ARMCX1	TSS1500-shelf
cg18422972	LUAD	male-bias	0.174116	11.8479	6.53293e-12	2.43742e-06	0.059014	1	X	40029227	BCOR	5'UTR-island
cg00730224	LUAD	male-bias	0.138828	11.8404	6.62432e-12	2.47152e-06	0.101102	1	X	140982540	MAGEC3	Body-opensea
cg18524099	LUAD	male-bias	0.207098	11.7901	7.2701e-12	2.71246e-06	0.110974	1	X	11456323	ARHGAP6	Body-opensea
cg11322877	LUAD	male-bias	0.205322	11.7648	7.61825e-12	2.84236e-06	0.143759	1	X	130965143	LOC286467	TSS1500-opensea
cg00173270	LUAD	male-bias	0.176666	11.7515	7.80872e-12	2.91342e-06	0.130658	1	X	106691272		IGR-shore
cg11395386	LUAD	female-bias	-0.240257	-11.7229	8.2349e-12	3.07243e-06	0.0401125	1	X	153360157	MECP2	Body-shelf
cg09440563	LUAD	female-bias	-0.17247	-11.7157	8.34588e-12	3.11383e-06	-0.077326	1	X	153770045	IKBKG	TSS1500-opensea
cg05052243	LUAD	male-bias	0.150557	11.6867	8.80953e-12	3.28682e-06	0.0467272	1	X	134975547	SAGE1	TSS1500-opensea
cg02022247	LUAD	female-bias	-0.193503	-11.673	9.0374e-12	3.37184e-06	-0.0768587	1	X	25029872	ARX	Body-shore
cg20780998	LUAD	female-bias	-0.286968	-11.6143	1.00827e-11	3.76183e-06	-0.036456	1	X	12996931		IGR-shelf
cg16242750	LUAD	male-bias	0.204837	11.6125	1.01168e-11	3.77454e-06	0.126619	1	X	11161309	ARHGAP6	Body-shelf
cg01396530	LUAD	female-bias	-0.251207	-11.6044	1.02713e-11	3.83221e-06	-0.0725592	1	X	12974262		IGR-opensea
cg11849673	LUAD	male-bias	0.140907	11.5564	1.12394e-11	4.19341e-06	0.117999	1	X	45022008	CXorf36	Body-opensea
cg24462545	LUAD	male-bias	0.156805	11.5475	1.14283e-11	4.26387e-06	-0.000546884	1	X	30254216	MAGEB3	Body-opensea
cg17627526	LUAD	female-bias	-0.25244	-11.4968	1.25728e-11	4.69088e-06	-0.124242	1	X	24665508	PCYT1B	TSS200-opensea
cg19570406	LUAD	male-bias	0.163675	11.472	1.31736e-11	4.91505e-06	0.101973	1	X	152684911	ZFP92	Body-shore
cg19794163	LUAD	female-bias	-0.176513	-11.453	1.3655e-11	5.09466e-06	-0.125816	1	X	152157977	PNMA5	3'UTR-opensea
cg13095698	LUAD	male-bias	0.139368	11.4064	1.49125e-11	5.56382e-06	0.0617812	1	X	84364580	SATL1	TSS1500-opensea
cg09614279	LUAD	male-bias	0.172362	11.3894	1.54033e-11	5.74695e-06	0.0497728	1	X	84189578	UBE2DNL	Body-island
cg01110765	LUAD	male-bias	0.274293	11.3714	1.59369e-11	5.94601e-06	0.202906	1	X	40016611	BCOR	5'UTR-shore
cg10084932	LUAD	male-bias	0.11236	11.3689	1.60126e-11	5.97428e-06	0.108641	1	X	134571153		IGR-island
cg24706857	LUAD	male-bias	0.233804	11.3549	1.64441e-11	6.13527e-06	0.0834875	1	X	150859549		IGR-shelf
cg03523360	LUAD	male-bias	0.127692	11.3457	1.67354e-11	6.24394e-06	-0.0374094	1	X	79279581	TBX22	Body-opensea
cg22126136	LUAD	female-bias	-0.146952	-11.3314	1.71964e-11	6.41595e-06	0.0143506	1	X	70797476	ACRC	TSS1500-shore
cg03658985	LUAD	female-bias	-0.189738	-11.3282	1.72992e-11	6.4543e-06	-0.112887	1	X	153167899	AVPR2	TSS200-opensea
cg18000886	LUAD	female-bias	-0.192811	-11.3277	1.73157e-11	6.46046e-06	-0.156909	1	X	25034241	ARX	TSS200-island
cg00387940	LUAD	male-bias	0.152148	11.3062	1.80406e-11	6.7309e-06	0.138823	1	X	149742400	MTM1	5'UTR-opensea
cg16244634	LUAD	female-bias	-0.216228	-11.2972	1.83539e-11	6.8478e-06	-0.0460584	1	X	129113524		IGR-shore
cg04929015	LUAD	male-bias	0.148281	11.2967	1.83697e-11	6.8537e-06	0.112075	1	X	17818629	RAI2	Body-opensea
cg23083269	LUAD	female-bias	-0.282447	-11.2608	1.96745e-11	7.34051e-06	-0.0756656	1	X	150863180		IGR-island
cg25125652	LUAD	female-bias	-0.23859	-11.2502	2.0075e-11	7.48995e-06	-0.175665	1	X	110039604	CHRDL1	TSS1500-shore
cg12239742	LUAD	female-bias	-0.137649	-11.2401	2.04673e-11	7.63631e-06	-0.0386758	1	X	18116923		IGR-opensea
cg11322406	LUAD	female-bias	-0.149537	-11.1907	2.24994e-11	8.39448e-06	-0.13282	1	X	114468360	LRCH2	1stExon-island
cg00194519	LUAD	male-bias	0.212629	11.1435	2.46377e-11	9.19226e-06	0.100065	1	X	133679545	MGC16121	Body-shore
cg02629737	LUAD	female-bias	-0.210415	-11.1373	2.493e-11	9.30135e-06	-0.120041	1	X	138285540	FGF13	5'UTR-island
cg13340269	LUAD	female-bias	-0.165799	-11.1318	2.51992e-11	9.40179e-06	-0.0925942	1	X	100333778	TMEM35	TSS200-opensea
cg09599027	LUAD	male-bias	0.12491	11.0684	2.84773e-11	1.06248e-05	0.0539681	1	X	43745111		IGR-shelf
cg16337138	LUAD	female-bias	-0.190737	-11.0164	3.14949e-11	1.17507e-05	-0.0601035	1	X	36976075		IGR-island
cg00406460	LUAD	female-bias	-0.204284	-11.0162	3.1505e-11	1.17545e-05	-0.122492	1	X	47433415	SYN1	Body-island
cg16135771	LUAD	male-bias	0.184658	10.9961	3.27586e-11	1.22222e-05	0.0627162	1	X	103030149	PLP1	TSS1500-opensea
cg24559969	LUAD	female-bias	-0.245991	-10.9571	3.5339e-11	1.31849e-05	-0.0509208	1	X	111326800	TRPC5	TSS1500-shore
cg07549474	LUAD	male-bias	0.143723	10.9419	3.64007e-11	1.3581e-05	0.0474759	1	X	141293862	MAGEC2	TSS1500-opensea
cg08145178	LUAD	male-bias	0.169471	10.9379	3.66866e-11	1.36877e-05	0.017058	1	X	103294452	MIR1256	Body-shore
cg25250241	LUAD	male-bias	0.153608	10.9273	3.74494e-11	1.39723e-05	0.0483733	1	X	103295154	MIR1256	Body-shore
cg25177692	LUAD	female-bias	-0.186237	-10.9032	3.92494e-11	1.46439e-05	-0.0418075	1	X	129193893		IGR-shore
cg25530944	LUAD	male-bias	0.124179	10.8907	4.02221e-11	1.50068e-05	0.0852415	1	X	130964695	LOC286467	TSS200-opensea
cg25685838	LUAD	male-bias	0.165522	10.8897	4.02984e-11	1.50352e-05	0.0883665	1	X	69643844	GDPD2	5'UTR-opensea
cg03675615	LUAD	male-bias	0.200254	10.8586	4.2826e-11	1.59783e-05	0.0482391	1	X	49593824	PAGE4	TSS200-opensea
cg09238868	LUAD	male-bias	0.181096	10.8342	4.49233e-11	1.67608e-05	0.10044	1	X	20286779		IGR-island
cg21306973	LUAD	female-bias	-0.257986	-10.8106	4.70545e-11	1.7556e-05	-0.101886	1	X	139584886		IGR-shore
cg11416605	LUAD	male-bias	0.15072	10.7903	4.89726e-11	1.82716e-05	0.126713	1	X	63267928		IGR-shelf
cg10443532	LUAD	female-bias	-0.220654	-10.7783	5.01367e-11	1.87059e-05	-0.0857744	1	X	136657084		IGR-island
cg11315492	LUAD	male-bias	0.162331	10.7006	5.84377e-11	2.1803e-05	0.135637	1	X	11153539		IGR-shelf
cg00374346	LUAD	male-bias	0.149209	10.6783	6.10748e-11	2.27869e-05	0.0963846	1	X	71349037	NHSL2	Body-shore
cg18811184	LUAD	male-bias	0.159417	10.6674	6.24154e-11	2.32871e-05	0.0415179	1	X	18720556	PPEF1	5'UTR-opensea
cg11655867	LUAD	male-bias	0.141924	10.6445	6.53084e-11	2.43664e-05	0.0240371	1	X	12513550	FRMPD4	Body-opensea
cg10871046	LUAD	female-bias	-0.171805	-10.6221	6.82721e-11	2.54722e-05	-0.0216433	1	X	152587054		IGR-island
cg07681653	LUAD	female-bias	-0.287668	-10.618	6.88347e-11	2.56821e-05	-0.0283823	1	X	139590479		IGR-island
cg16531342	LUAD	male-bias	0.142898	10.5848	7.35389e-11	2.74372e-05	0.06184	1	X	153995564	DKC1	Body-shelf
cg26383972	LUAD	female-bias	-0.154807	-10.5563	7.7833e-11	2.90393e-05	-0.0146286	1	X	113817409	HTR2C	TSS1500-shore
cg10874556	LUAD	female-bias	-0.238921	-10.5304	8.1954e-11	3.05769e-05	-0.0927978	1	X	100446569		IGR-island
cg18827893	LUAD	male-bias	0.190606	10.5062	8.60209e-11	3.20942e-05	-0.00455257	1	X	27765005	DCAF8L2	5'UTR-opensea
cg21771569	LUAD	male-bias	0.202393	10.4586	9.46148e-11	3.53006e-05	0.151164	1	X	18446114	CDKL5	5'UTR-shore
cg06159667	LUAD	male-bias	0.166094	10.4485	9.65679e-11	3.60293e-05	0.063711	1	X	103268258	H2BFWT	TSS200-island
cg13867326	LUAD	male-bias	0.158763	10.4419	9.78549e-11	3.65095e-05	0.0758509	1	X	13821440	GPM6B	Body-opensea
cg05789980	LUAD	female-bias	-0.197196	-10.429	1.00416e-10	3.74649e-05	0.0591053	1	X	119442797	FAM70A	Body-shelf
cg25602651	LUAD	male-bias	0.188361	10.3767	1.11572e-10	4.16271e-05	0.0585158	1	X	27999728	DCAF8L1	TSS200-opensea
cg26011743	LUAD	male-bias	0.213711	10.3739	1.12196e-10	4.186e-05	0.10127	1	X	36794119		IGR-opensea
cg05078558	LUAD	male-bias	0.159471	10.3626	1.14792e-10	4.28286e-05	0.127582	1	X	140269750		IGR-shore
cg01370179	LUAD	female-bias	-0.163341	-10.3586	1.15705e-10	4.31692e-05	-0.0395728	1	X	153218937	HCFC1	Body-island
cg25549519	LUAD	male-bias	0.148677	10.3442	1.19136e-10	4.44493e-05	0.121135	1	X	151306094	MAGEA10	5'UTR-opensea
cg18336502	LUAD	female-bias	-0.186242	-10.2891	1.33163e-10	4.96827e-05	-0.0757398	1	X	11446209	ARHGAP6	Body-shore
cg01382771	LUAD	male-bias	0.203109	10.2643	1.40037e-10	5.22476e-05	0.0663545	1	X	102983822	GLRA4	TSS1500-opensea
cg11720010	LUAD	male-bias	0.14646	10.2327	1.49328e-10	5.57141e-05	0.102476	1	X	37266204	PRRG1	Body-opensea
cg27550498	LUAD	male-bias	0.172674	10.2171	1.54156e-10	5.75152e-05	0.170896	1	X	70340920	MED12	Body-shelf
cg00933162	LUAD	male-bias	0.101662	10.2129	1.55464e-10	5.80034e-05	0.0958686	1	X	55024263		IGR-shelf
cg22818965	LUAD	female-bias	-0.216375	-10.2068	1.57398e-10	5.8725e-05	-0.0392706	1	X	103499842	ESX1	TSS1500-island
cg18836258	LUAD	female-bias	-0.234102	-10.2067	1.5745e-10	5.87442e-05	-0.0904316	1	X	71793459	HDAC8	TSS1500-opensea
cg04077363	LUAD	female-bias	-0.219023	-10.1877	1.63677e-10	6.10676e-05	-0.0363635	1	X	102531881	TCEAL5	TSS200-opensea
cg02994237	LUAD	male-bias	0.201406	10.1858	1.64302e-10	6.13009e-05	0.103651	1	X	137750892	FGF13	Body-opensea
cg21252909	LUAD	female-bias	-0.190021	-10.1783	1.66815e-10	6.22384e-05	-0.111877	1	X	30326328	NR0B1	1stExon-shore
cg12075996	LUAD	male-bias	0.151746	10.1546	1.75103e-10	6.53308e-05	0.0947332	1	X	17758966	SCML1	5'UTR-shelf
cg17547578	LUAD	male-bias	0.171789	10.1479	1.77511e-10	6.62292e-05	0.100253	1	X	102983589	GLRA4	TSS200-opensea
cg17221316	LUAD	male-bias	0.0835796	10.1307	1.83857e-10	6.85965e-05	0.0615925	1	X	137700841	LOC158696	TSS1500-opensea
cg11771863	LUAD	female-bias	-0.203069	-10.1282	1.84826e-10	6.89583e-05	-0.0967189	1	X	118893434	ANKRD58	1stExon-island
cg01473525	LUAD	male-bias	0.198074	10.1205	1.87772e-10	7.00572e-05	0.113177	1	X	103085819	RAB9B	5'UTR-shore
cg20214004	LUAD	female-bias	-0.177978	-10.1157	1.89615e-10	7.0745e-05	-0.0586273	1	X	125686980	DCAF12L1	TSS200-shore
cg24489686	LUAD	male-bias	0.146652	10.0904	1.99681e-10	7.45004e-05	0.098782	1	X	137789932	FGF13	Body-shelf
cg12017815	LUAD	female-bias	-0.205264	-10.0881	2.00639e-10	7.48581e-05	-0.0567327	1	X	72667289	CDX4	1stExon-island
cg00195237	LUAD	male-bias	0.207025	10.0848	2.02017e-10	7.53722e-05	0.0775035	1	X	68722118		IGR-shore
cg13859943	LUAD	male-bias	0.217775	10.0719	2.07416e-10	7.73866e-05	0.0226406	1	X	21670281	CNKSR2	Body-shelf
cg23575644	LUAD	male-bias	0.157506	10.0673	2.09393e-10	7.81241e-05	0.0478135	1	X	135424318	GPR112	Body-opensea
cg02818322	LUAD	male-bias	0.164151	10.0437	2.19801e-10	8.20074e-05	0.128458	1	X	140926409	MAGEC3	Body-opensea
cg20469935	LUAD	male-bias	0.155555	10.0224	2.29664e-10	8.56871e-05	0.0863799	1	X	130964757	LOC286467	TSS200-opensea
cg00291222	LUAD	female-bias	-0.182391	-10.0223	2.2972e-10	8.57079e-05	-0.0531436	1	X	100910662	ARMCX2	3'UTR-opensea
cg27124447	LUAD	female-bias	-0.182941	-10.0027	2.39166e-10	8.92325e-05	-0.0963903	1	X	16884789	RBBP7	Body-shelf
cg00206332	LUAD	male-bias	0.214434	9.98193	2.49651e-10	9.31442e-05	0.0374791	1	X	151140984	GABRE	Body-shore
cg08421550	LUAD	male-bias	0.119468	9.96845	2.56698e-10	9.57737e-05	0.0924979	1	X	150883777	FATE1	TSS1500-opensea
cg00412368	LUAD	female-bias	-0.267734	-9.96841	2.56719e-10	9.57814e-05	-0.174953	1	X	138285393	FGF13	5'UTR-island
cg04037732	LUAD	female-bias	-0.238142	-9.9578	2.62416e-10	9.79071e-05	-0.081453	1	X	70364775	NLGN3	1stExon-opensea
cg23647037	LUAD	female-bias	-0.247189	-9.95038	2.66471e-10	9.942e-05	0.00299981	1	X	119150375		IGR-shore
cg01854931	LUAD	male-bias	0.122574	9.94682	2.68442e-10	0.000100155	0.108881	1	X	122321985	GRIA3	Body-shelf
cg25270089	LUAD	male-bias	0.155743	9.94059	2.71929e-10	0.000101456	0.0818932	1	X	153099097		IGR-shelf
cg00695046	LUAD	female-bias	-0.235564	-9.87651	3.10585e-10	0.000115879	-0.0503988	1	X	100545995	TAF7L	Body-shore
cg24383344	LUAD	female-bias	-0.144951	-9.87513	3.11476e-10	0.000116211	-0.0393472	1	X	25020570		IGR-island
cg02625237	LUAD	female-bias	-0.164378	-9.87209	3.13449e-10	0.000116947	0.0275242	1	X	66793272	AR	Body-opensea
cg22622899	LUAD	male-bias	0.110314	9.8473	3.30038e-10	0.000123137	0.062277	1	X	45016993	CXorf36	Body-island
cg02433685	LUAD	female-bias	-0.137923	-9.83489	3.38679e-10	0.00012636	-0.0396592	1	X	149716604		IGR-shore
cg13328614	LUAD	female-bias	-0.211906	-9.82822	3.43419e-10	0.000128129	-0.0293756	1	X	48775123	PIM2	Body-shore
cg07780118	LUAD	female-bias	-0.183145	-9.81923	3.49915e-10	0.000130553	-0.156696	1	X	66766506	AR	1stExon-shore
cg05929865	LUAD	male-bias	0.123554	9.80273	3.62179e-10	0.000135128	0.05468	1	X	70128121	TEX11	5'UTR-opensea
cg00932276	LUAD	female-bias	-0.191745	-9.75689	3.98596e-10	0.000148716	0.00928436	1	X	13587976	EGFL6	5'UTR-island
cg21761699	LUAD	male-bias	0.147815	9.75058	4.039e-10	0.000150694	0.0781449	1	X	41108958		IGR-shelf
cg25832529	LUAD	male-bias	0.229351	9.73855	4.14209e-10	0.00015454	0.0779456	1	X	77915772	ZCCHC5	TSS1500-opensea
cg15602735	LUAD	male-bias	0.0865671	9.70272	4.46552e-10	0.000166608	-0.00567912	1	X	141293333	MAGEC2	TSS1500-opensea
cg10421691	LUAD	male-bias	0.0854225	9.6765	4.71853e-10	0.000176048	0.0701428	1	X	45241425		IGR-island
cg20262712	LUAD	male-bias	0.161067	9.66689	4.81487e-10	0.000179642	0.0696735	1	X	117120608	KLHL13	5'UTR-opensea
cg07934503	LUAD	male-bias	0.179959	9.6666	4.81784e-10	0.000179753	0.0825758	1	X	49639720		IGR-shelf
cg00578645	LUAD	male-bias	0.123134	9.65588	4.92785e-10	0.000183857	0.0998542	1	X	139012736		IGR-shore
cg25171798	LUAD	male-bias	0.179469	9.63462	5.15367e-10	0.000192282	0.0989467	1	X	103354340	MCART6	5'UTR-shelf
cg26283136	LUAD	male-bias	0.130343	9.6232	5.27929e-10	0.000196969	0.0659747	1	X	150944987		IGR-opensea
cg12426996	LUAD	male-bias	0.133007	9.6158	5.36249e-10	0.000200073	0.117295	1	X	123467006		IGR-island
cg10503697	LUAD	male-bias	0.150112	9.50585	6.76904e-10	0.000252552	0.0534064	1	X	117102168	KLHL13	5'UTR-opensea
cg19930575	LUAD	male-bias	0.166508	9.50421	6.79263e-10	0.000253432	0.125285	1	X	151122266	GABRE	3'UTR-opensea
cg14592807	LUAD	male-bias	0.166762	9.47341	7.25276e-10	0.000270599	0.0486859	1	X	27481416	SMEK3P	Body-opensea
cg09287459	LUAD	female-bias	-0.201972	-9.47098	7.29034e-10	0.000272001	-0.0751693	1	X	39548787		IGR-shore
cg25887010	LUAD	female-bias	-0.127139	-9.46284	7.41787e-10	0.000276759	-0.0684975	1	X	53029709		IGR-island
cg22090245	LUAD	female-bias	-0.242453	-9.45485	7.54541e-10	0.000281518	-0.104342	1	X	99661860	PCDH19	1stExon-island
cg05793108	LUAD	male-bias	0.0834143	9.41018	8.30048e-10	0.000309689	0.0487033	1	X	118012978		IGR-island
cg15892676	LUAD	male-bias	0.0959452	9.40785	8.34185e-10	0.000311233	0.0915887	1	X	63444159	ASB12	3'UTR-opensea
cg04812084	LUAD	male-bias	0.109335	9.40055	8.47317e-10	0.000316132	0.104885	1	X	19819286	SH3KBP1	TSS1500-opensea
cg12841929	LUAD	female-bias	-0.126071	-9.38775	8.70844e-10	0.00032491	-0.0973883	1	X	50557522	SHROOM4	TSS1500-shore
cg18727700	LUAD	male-bias	0.166017	9.38752	8.71279e-10	0.000325073	0.00578222	1	X	99898930	SRPX2	TSS1500-opensea
cg19045344	LUAD	male-bias	0.229982	9.38395	8.77954e-10	0.000327563	0.125362	1	X	84364350	SATL1	TSS1500-opensea
cg01364907	LUAD	male-bias	0.142253	9.38068	8.84125e-10	0.000329865	0.0371049	1	X	24336335		IGR-shelf
cg01058932	LUAD	male-bias	0.155253	9.34937	9.45514e-10	0.000352769	0.098349	1	X	55021626	PFKFB1	TSS1500-opensea
cg22539189	LUAD	male-bias	0.130681	9.33947	9.65811e-10	0.000360342	0.071197	1	X	2746420	GYG2	TSS1500-shore
cg21605248	LUAD	male-bias	0.148209	9.31152	1.02561e-09	0.000382652	0.094149	1	X	119382181		IGR-shelf
cg13503613	LUAD	male-bias	0.125996	9.26677	1.12936e-09	0.000421364	0.124031	1	X	135278915	FHL1	5'UTR-opensea
cg21943052	LUAD	female-bias	-0.22796	-9.25887	1.14879e-09	0.000428611	-0.105076	1	X	152760157	BGN	TSS200-opensea
cg01349480	LUAD	male-bias	0.107106	9.2347	1.21034e-09	0.000451574	0.0499998	1	X	138282248	FGF13	5'UTR-shelf
cg21330641	LUAD	male-bias	0.11764	9.21579	1.26083e-09	0.000470415	0.0874955	1	X	118780930	2024-09-06	Body-opensea
cg07311845	LUAD	female-bias	-0.234784	-9.19071	1.33119e-09	0.000496666	-0.129514	1	X	154842736	TMLHE	TSS200-shore
cg00909388	LUAD	male-bias	0.115291	9.18072	1.36033e-09	0.000507536	0.0993922	1	X	10085400	WWC3	Body-island
cg06794323	LUAD	female-bias	-0.20165	-9.16855	1.3967e-09	0.000521108	0.0558807	1	X	43518105	MAOA	Body-shelf
cg09719466	LUAD	male-bias	0.192175	9.1521	1.44748e-09	0.00054005	0.115864	1	X	41334987		IGR-shore
cg22873145	LUAD	female-bias	-0.150655	-9.14128	1.4819e-09	0.000552894	-0.0196147	1	X	100914906	ARMCX2	TSS200-opensea
cg21598868	LUAD	male-bias	0.0981404	9.13557	1.50042e-09	0.000559802	0.062722	1	X	15621167	ACE2	TSS1500-opensea
cg13369656	LUAD	male-bias	0.148849	9.12433	1.53753e-09	0.00057365	0.0923116	1	X	151287089	MAGEA5	TSS1500-opensea
cg17980977	LUAD	female-bias	-0.197079	-9.11172	1.58032e-09	0.000589615	-0.168454	1	X	79590789	FAM46D	TSS1500-island
cg13929917	LUAD	male-bias	0.17984	9.10642	1.59866e-09	0.000596457	0.0465562	1	X	40017269	BCOR	5'UTR-shore
cg26551791	LUAD	male-bias	0.196329	9.07377	1.71658e-09	0.000640454	0.0699698	1	X	145076879	MIR888	TSS1500-opensea
cg14150883	LUAD	male-bias	0.110742	9.04041	1.84632e-09	0.000688857	0.0948962	1	X	71355311	NHSL2	Body-shelf
cg25131597	LUAD	male-bias	0.170615	9.03875	1.853e-09	0.000691351	0.122404	1	X	67423243	OPHN1	Body-opensea
cg20851325	LUAD	female-bias	-0.131482	-9.03719	1.85934e-09	0.000693718	0.0427773	1	X	153169432	AVPR2	TSS1500-opensea
cg01145939	LUAD	male-bias	0.094672	9.03698	1.86019e-09	0.000694034	0.0716469	1	X	10098219	WWC3	Body-shelf
cg09368035	LUAD	male-bias	0.134834	9.01931	1.93352e-09	0.000721394	0.0503292	1	X	39943369	BCOR	5'UTR-island
cg01132485	LUAD	male-bias	0.110813	9.01417	1.95542e-09	0.000729561	0.0933483	1	X	139040942	CXorf66	Body-opensea
cg00221961	LUAD	female-bias	-0.168456	-9.00923	1.97666e-09	0.000737488	-0.135178	1	X	15755566	CA5B	TSS1500-shore
cg23238793	LUAD	female-bias	-0.136853	-8.99645	2.0328e-09	0.000758432	-0.112082	1	X	25025519	ARX	Body-island
cg11864566	LUAD	female-bias	-0.180014	-8.99256	2.05023e-09	0.000764935	-0.0494284	1	X	99667214		IGR-island
cg19406003	LUAD	female-bias	-0.142291	-8.98832	2.06939e-09	0.000772085	-0.0651513	1	X	153029309	PLXNB3	TSS1500-shelf
cg22627750	LUAD	male-bias	0.131151	8.98774	2.07203e-09	0.000773069	0.0679732	1	X	50216175		IGR-shore
cg06442844	LUAD	female-bias	-0.24544	-8.98458	2.08643e-09	0.000778443	-0.0672334	1	X	117958793	ZCCHC12	5'UTR-shore
cg06692867	LUAD	male-bias	0.0853578	8.98212	2.09772e-09	0.000782654	0.0773833	1	X	153560828		IGR-shore
cg04854285	LUAD	female-bias	-0.127867	-8.97499	2.1308e-09	0.000794998	-0.00430544	1	X	102531822	TCEAL5	TSS200-opensea
cg23196584	LUAD	male-bias	0.147528	8.96445	2.18068e-09	0.000813608	0.111686	1	X	84497869	ZNF711	TSS1500-shore
cg25737241	LUAD	male-bias	0.120794	8.95736	2.21492e-09	0.000826383	-0.00850484	1	X	43739887	MAOB	Body-shore
cg25569491	LUAD	male-bias	0.115147	8.95228	2.23978e-09	0.000835656	0.0462781	1	X	30264720	MAGEB1	5'UTR-shore
cg12321798	LUAD	male-bias	0.129141	8.93482	2.32741e-09	0.000868351	0.127289	1	X	71363939	FLJ44635	TSS200-opensea
cg12468189	LUAD	female-bias	-0.156907	-8.93258	2.33894e-09	0.000872652	-0.0828443	1	X	153046767	SRPK3	Body-island
cg13817994	LUAD	female-bias	-0.150453	-8.92836	2.36074e-09	0.000880787	-0.0011556	1	X	152600484	ZNF275	5'UTR-shore
cg15383797	LUAD	male-bias	0.114972	8.91564	2.42779e-09	0.000905803	0.111005	1	X	49965284	AKAP4	TSS1500-opensea
cg15198729	LUAD	female-bias	-0.167946	-8.91414	2.43586e-09	0.000908816	-0.0651123	1	X	100446496		IGR-island
cg19250658	LUAD	male-bias	0.154728	8.90601	2.47988e-09	0.00092524	-0.0939535	1	X	128654456	SMARCA1	Body-shelf
cg19011478	LUAD	female-bias	-0.245244	-8.90045	2.51044e-09	0.000936639	-0.0284684	1	X	25028057	ARX	Body-shelf
cg16975045	LUAD	male-bias	0.105689	8.8898	2.57011e-09	0.000958902	0.0924849	1	X	71936863		IGR-shelf
cg17281810	LUAD	male-bias	0.203606	8.88474	2.59896e-09	0.000969667	0.192074	1	X	40007949	BCOR	5'UTR-shore
cg19169658	LUAD	male-bias	0.171246	8.82069	2.99432e-09	0.00111717	0.13762	1	X	114423840	RBMXL3	TSS200-shore
cg03761894	LUAD	female-bias	-0.172692	-8.81235	3.05019e-09	0.00113802	-0.0710532	1	X	71527796	CITED1	TSS1500-shore
cg17205788	LUAD	male-bias	0.144547	8.79141	3.19516e-09	0.00119211	0.0572724	1	X	79277067	TBX22	5'UTR-opensea
cg07483816	LUAD	male-bias	0.0475798	8.78354	3.25152e-09	0.00121313	0.0461422	1	X	70708623	BCYRN1	Body-shelf
cg26818954	LUAD	male-bias	0.130116	8.78245	3.25939e-09	0.00121607	0.0765864	1	X	17881680		IGR-shore
cg06116594	LUAD	male-bias	0.205838	8.76946	3.35476e-09	0.00125165	0.0880118	1	X	70180220		IGR-opensea
cg17156570	LUAD	female-bias	-0.16844	-8.76709	3.37246e-09	0.00125826	-0.0900003	1	X	139592377		IGR-shore
cg20065832	LUAD	female-bias	-0.163541	-8.75482	3.46575e-09	0.00129307	-0.124881	1	X	82763518	POU3F4	1stExon-shore
cg16648812	LUAD	male-bias	0.106069	8.73372	3.63236e-09	0.00135523	0.0526847	1	X	25043641		IGR-shelf
cg15604615	LUAD	male-bias	0.126147	8.72603	3.69514e-09	0.00137865	0.0988793	1	X	150866552	PRRG3	TSS1500-shelf
cg06457249	LUAD	male-bias	0.244689	8.72442	3.70839e-09	0.00138359	0.159315	1	X	39864290		IGR-shore
cg20344820	LUAD	male-bias	0.1893	8.72185	3.72966e-09	0.00139153	0.125739	1	X	114058123	HTR2C	Body-opensea
cg12057563	LUAD	female-bias	-0.187011	-8.72161	3.73164e-09	0.00139227	-0.115029	1	X	135230841	FHL1	Body-shore
cg10436191	LUAD	male-bias	0.126242	8.70817	3.84513e-09	0.00143461	0.02519	1	X	113865353	SNORA35	Body-opensea
cg20959965	LUAD	male-bias	0.135996	8.69121	3.9935e-09	0.00148997	0.0215673	1	X	37606012		IGR-opensea
cg22040303	LUAD	male-bias	0.148972	8.68479	4.05114e-09	0.00151147	0.0764645	1	X	150912076	CNGA2	Body-opensea
cg08384999	LUAD	male-bias	0.121252	8.6753	4.1379e-09	0.00154384	0.0174719	1	X	40004346	BCOR	5'UTR-island
cg10622126	LUAD	male-bias	0.15658	8.66988	4.18839e-09	0.00156268	0.0539603	1	X	147598391	AFF2	Body-opensea
cg17733714	LUAD	female-bias	-0.136646	-8.66953	4.19159e-09	0.00156387	-0.0514735	1	X	68114285		IGR-shore
cg09140084	LUAD	male-bias	0.154829	8.66935	4.19327e-09	0.0015645	0.0659438	1	X	140990878	MAGEC1	TSS1500-opensea
cg26024941	LUAD	male-bias	0.111824	8.66077	4.2745e-09	0.00159481	0.069708	1	X	16166956	GRPR	Body-opensea
cg01354447	LUAD	male-bias	0.125621	8.65526	4.32754e-09	0.0016146	0.025403	1	X	31089887	FTHL17	1stExon-island
cg05254049	LUAD	female-bias	-0.230853	-8.65148	4.36432e-09	0.00162832	-0.089418	1	X	47479662	SYN1	TSS1500-shore
cg18418655	LUAD	female-bias	-0.142117	-8.63987	4.47918e-09	0.00167117	-0.0781584	1	X	70331557	IL2RG	TSS200-opensea
cg14688179	LUAD	female-bias	-0.134178	-8.61757	4.70866e-09	0.00175679	-0.0525406	1	X	153770983	G6PD	Body-shelf
cg02599583	LUAD	male-bias	0.0986664	8.60308	4.8642e-09	0.00181483	0.0858327	1	X	134155241	FAM127C	1stExon-shore
cg08762253	LUAD	male-bias	0.110341	8.5978	4.9222e-09	0.00183646	0.0642298	1	X	103031565	PLP1	TSS200-opensea
cg13118590	LUAD	male-bias	0.124985	8.59652	4.93638e-09	0.00184175	0.087353	1	X	21777160	SMPX	TSS1500-opensea
cg25691526	LUAD	male-bias	0.19055	8.58436	5.07306e-09	0.00189275	0.153686	1	X	130964707	LOC286467	TSS200-opensea
cg26793903	LUAD	female-bias	-0.121106	-8.56478	5.30136e-09	0.00197793	-0.106686	1	X	136629762		IGR-island
cg03822658	LUAD	male-bias	0.0565513	8.5623	5.33099e-09	0.00198898	0.0208962	1	X	153409560	OPN1LW	TSS200-opensea
cg03699508	LUAD	male-bias	0.153905	8.55879	5.3732e-09	0.00200473	0.00343457	1	X	79280150	TBX22	Body-opensea
cg09821007	LUAD	female-bias	-0.110244	-8.55866	5.37479e-09	0.00200532	-0.0755306	1	X	68348763		IGR-island
cg20967299	LUAD	male-bias	0.135845	8.54661	5.52255e-09	0.00206045	0.084631	1	X	68833308		IGR-shelf
cg02150469	LUAD	female-bias	-0.108369	-8.52885	5.74805e-09	0.00214458	-0.00688785	1	X	70327995	CXorf65	TSS1500-opensea
cg12856407	LUAD	female-bias	-0.120124	-8.5164	5.91169e-09	0.00220564	-0.0229035	1	X	78622565	ITM2A	Body-opensea
cg03598919	LUAD	male-bias	0.117385	8.51612	5.91537e-09	0.00220701	0.0461505	1	X	51150887	CXorf67	1stExon-island
cg21805136	LUAD	female-bias	-0.175844	-8.51131	5.97989e-09	0.00223108	-0.143358	1	X	39436529		IGR-opensea
cg16821267	LUAD	male-bias	0.129601	8.50727	6.03467e-09	0.00225152	0.0419008	1	X	27840014	MAGEB10	Body-opensea
cg25790279	LUAD	female-bias	-0.190623	-8.49796	6.16286e-09	0.00229935	-0.0605458	1	X	153602509	FLNA	5'UTR-shore
cg01597947	LUAD	male-bias	0.21941	8.48295	6.37544e-09	0.00237866	0.104907	1	X	39870568		IGR-shore
cg01796247	LUAD	male-bias	0.187352	8.46999	6.56495e-09	0.00244937	0.0527376	1	X	144901935	SLITRK2	TSS1500-shore
cg17513145	LUAD	male-bias	0.0830783	8.45889	6.73191e-09	0.00251166	0.072105	1	X	122316664	GRIA3	TSS1500-shelf
cg23722529	LUAD	female-bias	-0.204515	-8.45696	6.7614e-09	0.00252266	-0.063344	1	X	11445498	ARHGAP6	Body-shore
cg11117255	LUAD	male-bias	0.232167	8.452	6.83762e-09	0.0025511	0.197772	1	X	40008202	BCOR	5'UTR-shore
cg24744459	LUAD	female-bias	-0.19089	-8.44273	6.98281e-09	0.00260527	-0.0275453	1	X	136649489	ZIC3	1stExon-island
cg01538344	LUAD	female-bias	-0.288375	-8.44156	7.00133e-09	0.00261218	-0.135481	1	X	100546291	TAF7L	1stExon-island
cg07811386	LUAD	female-bias	-0.118592	-8.44045	7.01889e-09	0.00261873	-0.0839214	1	X	15768223	CA5B	Body-opensea
cg03184366	LUAD	female-bias	-0.206483	-8.43932	7.03692e-09	0.00262546	-0.10461	1	X	9984977	WWC3	5'UTR-shore
cg07812390	LUAD	male-bias	0.173298	8.43746	7.06671e-09	0.00263658	0.112902	1	X	68061003	EFNB1	3'UTR-shore
cg20976488	LUAD	male-bias	0.163825	8.43691	7.07552e-09	0.00263986	0.0852988	1	X	48370301	PORCN	Body-shelf
cg19355555	LUAD	female-bias	-0.141439	-8.42201	7.31856e-09	0.00273054	-0.112837	1	X	114468681	LRCH2	TSS200-shore
cg07283407	LUAD	male-bias	0.165978	8.42092	7.33659e-09	0.00273727	0.0747272	1	X	133679994	MGC16121	Body-shore
cg12491455	LUAD	female-bias	-0.123774	-8.40464	7.61283e-09	0.00284033	0.00950148	1	X	11128728	HCCS	TSS1500-shore
cg08693325	LUAD	male-bias	0.132651	8.39762	7.73517e-09	0.00288598	0.0353964	1	X	114523818	LUZP4	TSS1500-opensea
cg20258249	LUAD	male-bias	0.164188	8.39443	7.79137e-09	0.00290694	0.144937	1	X	64774985		IGR-shelf
cg08382577	LUAD	female-bias	-0.179314	-8.37204	8.19817e-09	0.00305872	-0.0945073	1	X	129194008		IGR-island
cg17407511	LUAD	female-bias	-0.220087	-8.36938	8.24794e-09	0.00307729	-0.169057	1	X	38080364	SRPX	TSS200-shore
cg19822434	LUAD	female-bias	-0.105075	-8.34846	8.65012e-09	0.00322734	-0.0421138	1	X	118744347		IGR-shelf
cg05679489	LUAD	female-bias	-0.0716691	-8.34184	8.78172e-09	0.00327644	-0.0542953	1	X	148552714		IGR-island
cg08818092	LUAD	female-bias	-0.0812199	-8.33637	8.8918e-09	0.00331751	-0.0596146	1	X	24665074	PCYT1B	Body-opensea
cg24035953	LUAD	female-bias	-0.122011	-8.33227	8.97535e-09	0.00334869	-0.104435	1	X	107976034	IRS4	1stExon-island
cg01337817	LUAD	female-bias	-0.196364	-8.33203	8.98028e-09	0.00335052	-0.0949815	1	X	152912242	DUSP9	5'UTR-shore
cg15365038	LUAD	female-bias	-0.167195	-8.32792	9.06481e-09	0.00338206	0.00294252	1	X	48930360	PRAF2	Body-island
cg13423140	LUAD	female-bias	-0.155785	-8.29744	9.71792e-09	0.00362574	-0.0944781	1	X	153167905	AVPR2	TSS200-opensea
cg17825231	LUAD	male-bias	0.105322	8.29698	9.72806e-09	0.00362952	0.0452895	1	X	34960973	FAM47B	1stExon-shore
cg17542495	LUAD	male-bias	0.141892	8.28282	1.0048e-08	0.00374889	0.137281	1	X	70443001	GJB1	TSS200-shore
cg16242260	LUAD	male-bias	0.159749	8.27902	1.01357e-08	0.00378162	0.0609487	1	X	12601679	FRMPD4	Body-island
cg00680081	LUAD	female-bias	-0.228625	-8.25108	1.08051e-08	0.00403137	-0.121954	1	X	79590905	FAM46D	TSS200-island
cg11307246	LUAD	male-bias	0.0942892	8.24988	1.0835e-08	0.00404252	0.0592923	1	X	102319998	BEX1	TSS1500-shore
cg00926894	LUAD	female-bias	-0.168114	-8.2415	1.1045e-08	0.00412088	-0.0924717	1	X	46938229	RGN	5'UTR-shore
cg21744850	LUAD	female-bias	-0.191664	-8.23834	1.11252e-08	0.00415079	-0.0845065	1	X	50214878	DGKK	TSS1500-shore
cg08264725	LUAD	male-bias	0.121498	8.23068	1.13223e-08	0.00422433	0.0674177	1	X	23018003	DDX53	TSS200-opensea
cg26563418	LUAD	male-bias	0.151478	8.22434	1.14884e-08	0.00428629	0.076694	1	X	130204910	FLJ30058	5'UTR-shelf
cg02169289	LUAD	male-bias	0.166747	8.21497	1.1738e-08	0.00437944	0.0236278	1	X	39967202	BCOR	5'UTR-island
cg09005457	LUAD	male-bias	0.0903594	8.21172	1.1826e-08	0.00441224	0.0725126	1	X	43626076	MAOB	3'UTR-opensea
cg14375772	LUAD	male-bias	0.1622	8.18693	1.2519e-08	0.0046708	0.0816214	1	X	120181969	GLUD2	1stExon-island
cg11932249	LUAD	female-bias	-0.148552	-8.17936	1.27388e-08	0.00475284	-0.079435	1	X	71524953	CITED1	5'UTR-island
cg01737550	LUAD	male-bias	0.149941	8.1767	1.28169e-08	0.00478198	0.0972138	1	X	101395217	TCEAL6	3'UTR-shelf
cg09331780	LUAD	male-bias	0.209339	8.16818	1.30709e-08	0.00487674	0.105232	1	X	84364419	SATL1	TSS1500-opensea
cg04227026	LUAD	male-bias	0.182257	8.16788	1.30799e-08	0.00488009	0.106642	1	X	150884661	FATE1	1stExon-opensea
cg27049053	LUAD	female-bias	-0.18386	-8.16472	1.31754e-08	0.00491573	-0.119267	1	X	151142517	GABRE	Body-shore
cg01408682	LUAD	male-bias	0.125078	8.15802	1.33803e-08	0.00499216	0.0530375	1	X	13063132	FAM9C	TSS1500-opensea
cg16497626	LUAD	male-bias	0.0836056	8.15461	1.34855e-08	0.00503143	0.0754669	1	X	103031450	PLP1	1stExon-opensea
cg02053896	LUAD	female-bias	-0.161572	-8.1544	1.34921e-08	0.00503386	0.0228935	1	X	70151117	SLC7A3	TSS200-shore
cg20446252	LUAD	male-bias	0.136713	8.14408	1.3817e-08	0.0051551	0.0512081	1	X	150797951	PASD1	Body-opensea
cg26814883	LUAD	female-bias	-0.158456	-8.1435	1.38353e-08	0.00516192	-0.00623729	1	X	70328127	CXorf65	TSS1500-opensea
cg00466819	LUAD	female-bias	-0.117516	-8.13099	1.42402e-08	0.00531298	-0.0533106	1	X	20009661		IGR-shore
cg25972680	LUAD	male-bias	0.0750207	8.12295	1.45069e-08	0.00541249	-0.0177763	1	X	110489914	CAPN6	Body-opensea
cg13716034	LUAD	male-bias	0.186725	8.12055	1.45873e-08	0.0054425	0.110039	1	X	65238737	MIR223	Body-opensea
cg19585278	LUAD	male-bias	0.140341	8.11981	1.46124e-08	0.00545187	0.0800272	1	X	102983199	GLRA4	5'UTR-opensea
cg27124742	LUAD	male-bias	0.11806	8.11445	1.47943e-08	0.00551974	0.0413354	1	X	23018006	DDX53	TSS200-opensea
cg15339180	LUAD	female-bias	-0.155932	-8.10736	1.50387e-08	0.0056109	0.0360109	1	X	70364545	NLGN3	TSS200-opensea
cg06137651	LUAD	female-bias	-0.217753	-8.10329	1.51806e-08	0.00566384	-0.124975	1	X	46940664	RGN	Body-shelf
cg26117336	LUAD	male-bias	0.226289	8.10298	1.51914e-08	0.00566789	0.194577	1	X	62574125		IGR-shelf
cg02345317	LUAD	female-bias	-0.207457	-8.09414	1.55051e-08	0.00578494	-0.0188663	1	X	70364543	NLGN3	TSS200-opensea
cg12154749	LUAD	male-bias	0.0875709	8.06389	1.66292e-08	0.00620431	0.0674659	1	X	103176599	MIR1256	Body-shelf
cg25499905	LUAD	male-bias	0.181106	8.04351	1.74329e-08	0.00650417	0.1116	1	X	129093272		IGR-shore
cg10786329	LUAD	female-bias	-0.0956373	-8.04296	1.74552e-08	0.00651249	0.0572631	1	X	119125722		IGR-shore
cg15731038	LUAD	male-bias	0.118576	8.04211	1.74898e-08	0.00652543	0.0806818	1	X	38008906	SRPX	3'UTR-opensea
cg01283227	LUAD	male-bias	0.195337	8.03524	1.77706e-08	0.00663016	0.135674	1	X	18446221	CDKL5	5'UTR-shore
cg01173508	LUAD	male-bias	0.129814	8.03112	1.79414e-08	0.00669389	0.0860915	1	X	110544388	DCX	3'UTR-opensea
cg22045077	LUAD	male-bias	0.158395	8.01891	1.8457e-08	0.00688626	0.129101	1	X	131574127	MBNL3	TSS1500-opensea
cg13675050	LUAD	female-bias	-0.117378	-8.00443	1.90881e-08	0.00712175	-0.11445	1	X	136628604		IGR-shore
cg22495120	LUAD	male-bias	0.078619	7.99934	1.9315e-08	0.00720639	0.0638953	1	X	147063094	FMR1NB	1stExon-shore
cg21908878	LUAD	male-bias	0.125793	7.98702	1.98762e-08	0.00741576	0.0409907	1	X	23017887	DDX53	TSS200-opensea
cg21493591	LUAD	female-bias	-0.112449	-7.97862	2.02686e-08	0.00756219	-0.0714596	1	X	24169729	ZFX	TSS200-shore
cg17155263	LUAD	male-bias	0.129747	7.97073	2.06441e-08	0.00770229	-0.038664	1	X	115594046	CXorf61	1stExon-opensea
cg21283832	LUAD	female-bias	-0.253189	-7.97064	2.06485e-08	0.00770392	-0.0995228	1	X	152680754		IGR-shelf
cg19144013	LUAD	female-bias	-0.156846	-7.96529	2.09072e-08	0.00780044	-0.153768	1	X	15511746	PIR	TSS1500-shore
cg16735667	LUAD	male-bias	0.120746	7.96265	2.10362e-08	0.00784857	0.104679	1	X	66788193	AR	TSS1500-opensea
cg23282949	LUAD	female-bias	-0.117665	-7.95024	2.16534e-08	0.00807883	0.0283583	1	X	153211709	RENBP	TSS1500-opensea
cg18971750	LUAD	male-bias	0.121317	7.93897	2.22296e-08	0.00829383	0.0189466	1	X	22981385		IGR-opensea
cg19697936	LUAD	male-bias	0.109911	7.93621	2.23731e-08	0.00834737	0.0852757	1	X	132096114	HS6ST2	TSS1500-shelf
cg08671330	LUAD	female-bias	-0.166096	-7.9361	2.23792e-08	0.00834965	-0.125587	1	X	138287900	FGF13	TSS1500-shore
cg14933706	LUAD	female-bias	-0.167847	-7.9326	2.25627e-08	0.0084181	-0.103818	1	X	139584816		IGR-shore
cg27121276	LUAD	female-bias	-0.161714	-7.92839	2.27854e-08	0.00850119	-0.115556	1	X	152677554		IGR-shore
cg10060499	LUAD	female-bias	-0.16286	-7.92657	2.28825e-08	0.00853741	-0.0653515	1	X	39378734		IGR-opensea
cg24822127	LUAD	male-bias	0.163639	7.91689	2.34052e-08	0.00873242	0.0656934	1	X	150884331	FATE1	TSS200-opensea
cg17974767	LUAD	female-bias	-0.193793	-7.9127	2.36354e-08	0.00881832	-0.0834592	1	X	48690187	PCSK1N	Body-island
cg05902740	LUAD	male-bias	0.163804	7.91217	2.36648e-08	0.00882929	0.0731455	1	X	109698667	RGAG1	3'UTR-opensea
cg05101765	LUAD	male-bias	0.0646788	7.91019	2.37741e-08	0.00887006	0.0219349	1	X	151902442	CSAG1	TSS1500-opensea
cg20795578	LUAD	female-bias	-0.187688	-7.90624	2.39946e-08	0.00895234	0.09306	1	X	136632532		IGR-island
cg17488785	LUAD	male-bias	0.176766	7.89695	2.45213e-08	0.00914884	0.0625259	1	X	140009093	MIR320D2	TSS1500-opensea
cg21248478	LUAD	female-bias	-0.165475	-7.89126	2.48495e-08	0.0092713	-0.108624	1	X	154563968	CLIC2	5'UTR-opensea
cg06217046	LUAD	female-bias	-0.154782	-7.87704	2.56899e-08	0.00958485	-0.103944	1	X	10094247	WWC3	Body-island
cg25084393	LUAD	female-bias	-0.178553	-7.8619	2.66168e-08	0.00993066	-0.165788	1	X	16729926	CTPS2	5'UTR-island
cg22952287	LUAD	male-bias	0.167591	7.8571	2.69179e-08	0.010043	0.0375833	1	X	103268599	H2BFWT	TSS1500-shore
cg08291487	LUAD	male-bias	0.137519	7.83931	2.80644e-08	0.0104708	0.0951287	1	X	145075914	MIR890	TSS200-opensea
cg12845419	LUAD	male-bias	0.168891	7.8013	3.06833e-08	0.0114479	0.0902721	1	X	135573249	BRS3	Body-opensea
cg04823894	LUAD	male-bias	0.1555	7.78186	3.21186e-08	0.0119834	-0.0109543	1	X	39865331		IGR-island
cg00451631	LUAD	female-bias	-0.192189	-7.77467	3.26667e-08	0.0121879	-0.145887	1	X	25021643		IGR-island
cg25934633	LUAD	male-bias	0.149911	7.77331	3.27714e-08	0.0122269	0.127206	1	X	51153528		IGR-shelf
cg14001161	LUAD	female-bias	-0.17064	-7.76355	3.35335e-08	0.0125113	-0.0308092	1	X	24713101	POLA1	Body-shore
cg10058095	LUAD	male-bias	0.117401	7.76002	3.38131e-08	0.0126156	0.109689	1	X	125301098	DCAF12L2	TSS1500-shore
cg23846114	LUAD	male-bias	0.129252	7.74974	3.46423e-08	0.012925	0.0106519	1	X	150867161	PRRG3	5'UTR-shelf
cg19687650	LUAD	female-bias	-0.16076	-7.74707	3.48609e-08	0.0130065	-0.134207	1	X	71289025	NHSL2	Body-opensea
cg07769622	LUAD	male-bias	0.111789	7.74541	3.49973e-08	0.0130574	0.045356	1	X	27481498	SMEK3P	TSS200-opensea
cg00141845	LUAD	female-bias	-0.196628	-7.74468	3.50577e-08	0.01308	-0.0759911	1	X	74493352	UPRT	TSS1500-opensea
cg06289882	LUAD	female-bias	-0.264518	-7.73926	3.55084e-08	0.0132481	-0.240682	1	X	129535465	RBMX2	TSS1500-shore
cg20262028	LUAD	male-bias	0.0836038	7.7225	3.69412e-08	0.0137827	0.0332582	1	X	47107481	USP11	3'UTR-opensea
cg18118743	LUAD	male-bias	0.121985	7.7061	3.83998e-08	0.0143269	0.0240115	1	X	139596703		IGR-shelf
cg22811030	LUAD	male-bias	0.0936693	7.69988	3.8968e-08	0.0145389	0.0806877	1	X	70128262	TEX11	5'UTR-opensea
cg19736094	LUAD	female-bias	-0.140997	-7.6902	3.98698e-08	0.0148753	-0.0145697	1	X	38080327	SRPX	TSS200-shore
cg12647861	LUAD	male-bias	0.152835	7.68992	3.98963e-08	0.0148852	0.0649077	1	X	103268125	MIR1256	Body-island
cg03909472	LUAD	female-bias	-0.110894	-7.67811	4.10273e-08	0.0153072	-0.0837076	1	X	15511733	PIR	TSS1500-shore
cg13486082	LUAD	male-bias	0.0769983	7.67109	4.17146e-08	0.0155636	0.0619289	1	X	102629870	NGFRAP1	TSS1500-shore
cg20781898	LUAD	male-bias	0.129506	7.67107	4.17159e-08	0.0155641	0.100346	1	X	50218103		IGR-shelf
cg06455967	LUAD	female-bias	-0.148423	-7.63727	4.51942e-08	0.0168619	-0.0517392	1	X	110187421	PAK3	TSS200-opensea
cg10259191	LUAD	male-bias	0.177702	7.63381	4.55669e-08	0.0170009	0.0812964	1	X	8700842	KAL1	TSS1500-shore
cg26710619	LUAD	male-bias	0.136158	7.62563	4.64592e-08	0.0173338	0.0891592	1	X	118357461		IGR-shore
cg25081977	LUAD	female-bias	-0.0943327	-7.61041	4.81692e-08	0.0179718	0.0403103	1	X	153219814	HCFC1	Body-island
cg15855671	LUAD	female-bias	-0.209915	-7.60319	4.90026e-08	0.0182828	-0.0113299	1	X	135863688	ARHGEF6	TSS200-opensea
cg03744357	LUAD	male-bias	0.153842	7.60111	4.92453e-08	0.0183733	0.139124	1	X	99196193	LOC442459	TSS1500-shore
cg01467249	LUAD	male-bias	0.122832	7.59957	4.94256e-08	0.0184406	0.0118545	1	X	135180523		IGR-island
cg25323709	LUAD	male-bias	0.187055	7.58605	5.10396e-08	0.0190428	0.0464254	1	X	84634451	POF1B	Body-opensea
cg12705541	LUAD	male-bias	0.192275	7.58388	5.13036e-08	0.0191413	0.105652	1	X	75245844		IGR-shelf
cg22144149	LUAD	female-bias	-0.165657	-7.58115	5.16383e-08	0.0192661	-0.13362	1	X	39021732		IGR-island
cg03088756	LUAD	male-bias	0.141377	7.57354	5.25812e-08	0.019618	0.112726	1	X	40011385	BCOR	5'UTR-island
cg22822140	LUAD	female-bias	-0.259329	-7.5606	5.42268e-08	0.0202319	-0.220253	1	X	153046577	SRPK3	1stExon-island
cg08867430	LUAD	male-bias	0.0633074	7.56025	5.42726e-08	0.020249	0.0343782	1	X	10092255	WWC3	Body-shore
cg22805594	LUAD	male-bias	0.0491429	7.55256	5.52755e-08	0.0206232	0.0294257	1	X	47082293	CDK16	Body-shelf
cg17533951	LUAD	female-bias	-0.172181	-7.54891	5.57585e-08	0.0208034	-0.0767788	1	X	68115082		IGR-shore
cg10646080	LUAD	female-bias	-0.179822	-7.51872	5.99207e-08	0.0223563	-0.0937044	1	X	130191821	FLJ30058	TSS1500-shore
cg08645737	LUAD	female-bias	-0.21747	-7.51516	6.04317e-08	0.022547	-0.12469	1	X	82766491		IGR-shore
cg06452970	LUAD	male-bias	0.2113	7.50974	6.12194e-08	0.0228408	0.154611	1	X	13835264	GPM6B	1stExon-opensea
cg05559881	LUAD	female-bias	-0.119515	-7.50676	6.16566e-08	0.023004	-0.0805968	1	X	136651644	ZIC3	Body-island
cg16122592	LUAD	male-bias	0.0691772	7.50474	6.19546e-08	0.0231151	0.0492637	1	X	26210712	MAGEB6	5'UTR-opensea
cg12544401	LUAD	male-bias	0.22441	7.49485	6.34354e-08	0.0236676	0.0954014	1	X	103291721	MIR1256	Body-shelf
cg18525817	LUAD	male-bias	0.121485	7.4912	6.39922e-08	0.0238754	0.117095	1	X	107977374	IRS4	1stExon-shore
cg17189778	LUAD	female-bias	-0.128191	-7.47594	6.63709e-08	0.0247628	0.0453743	1	X	153169823	AVPR2	TSS1500-opensea
cg05131629	LUAD	male-bias	0.167747	7.45004	7.06159e-08	0.0263467	0.11478	1	X	41307114	NYX	5'UTR-opensea
cg08264124	LUAD	male-bias	0.110673	7.44635	7.12434e-08	0.0265808	0.0984182	1	X	63006802	MIR1468	TSS1500-opensea
cg16797340	LUAD	female-bias	-0.111427	-7.44321	7.1781e-08	0.0267814	-0.0947925	1	X	135225923		IGR-shelf
cg17678039	LUAD	female-bias	-0.144701	-7.43708	7.28426e-08	0.0271774	-0.0159251	1	X	70838476	CXCR3	TSS200-opensea
cg04774951	LUAD	male-bias	0.17256	7.43509	7.31912e-08	0.0273075	0.0684494	1	X	104466053	IL1RAPL2	Body-opensea
cg02437314	LUAD	male-bias	0.0648362	7.43406	7.33724e-08	0.0273751	0.0511477	1	X	71521494	CITED1	3'UTR-shelf
cg02336026	LUAD	male-bias	0.170656	7.4338	7.34191e-08	0.0273925	0.122245	1	X	152220506		IGR-shelf
cg00725777	LUAD	male-bias	0.136388	7.42751	7.45338e-08	0.0278084	0.102458	1	X	102630411	NGFRAP1	TSS1500-shore
cg11868078	LUAD	male-bias	0.153069	7.4271	7.46068e-08	0.0278357	0.133283	1	X	39022915		IGR-shore
cg07005924	LUAD	male-bias	0.133771	7.42413	7.51404e-08	0.0280347	0.113115	1	X	37001209		IGR-shelf
cg08750061	LUAD	female-bias	-0.123549	-7.41653	7.65242e-08	0.028551	-0.0413248	1	X	117860789	IL13RA1	TSS1500-shore
cg19566414	LUAD	female-bias	-0.150923	-7.41585	7.66489e-08	0.0285976	-0.0665974	1	X	130423448	IGSF1	TSS200-opensea
cg16564271	LUAD	male-bias	0.104279	7.39543	8.05013e-08	0.0300349	0.0832928	1	X	138769193	MCF2	5'UTR-opensea
cg24853313	LUAD	male-bias	0.162808	7.39316	8.09405e-08	0.0301987	0.0587468	1	X	145078200	MIR892A	Body-opensea
cg10811052	LUAD	male-bias	0.148453	7.38148	8.32466e-08	0.0310591	0.115406	1	X	57311872	FAAH2	TSS1500-opensea
cg17830714	LUAD	female-bias	-0.140095	-7.36516	8.6579e-08	0.0323025	-0.0604957	1	X	153630330	DNASE1L1	3'UTR-shelf
cg02814558	LUAD	male-bias	0.0842922	7.36194	8.72521e-08	0.0325536	-0.0315775	1	X	150867810	PRRG3	Body-shelf
cg09329826	LUAD	female-bias	-0.176135	-7.34986	8.98265e-08	0.0335141	-0.149641	1	X	153094594	PDZD4	Body-island
cg15232885	LUAD	male-bias	0.128024	7.34813	9.02028e-08	0.0336545	0.109328	1	X	140925367	MAGEC3	TSS1500-opensea
cg17928317	LUAD	male-bias	0.150426	7.33532	9.30307e-08	0.0347096	0.145532	1	X	140982278	MAGEC3	Body-opensea
cg17120139	LUAD	female-bias	-0.133472	-7.32651	9.50259e-08	0.035454	-0.0587299	1	X	152587146		IGR-island
cg13524554	LUAD	male-bias	0.145822	7.326	9.5143e-08	0.0354977	0.0707552	1	X	39552531		IGR-shelf
cg20839655	LUAD	female-bias	-0.147544	-7.3236	9.56949e-08	0.0357036	-0.117863	1	X	40507257	CXorf38	TSS1500-shore
cg23245720	LUAD	female-bias	-0.137983	-7.32247	9.59581e-08	0.0358018	-0.120661	1	X	133680549	MGC16121	Body-island
cg03508597	LUAD	male-bias	0.130919	7.31805	9.69845e-08	0.0361847	0.0397679	1	X	45060356	CXorf36	TSS1500-opensea
cg14745824	LUAD	male-bias	0.155395	7.30235	1.00731e-07	0.0375825	0.122031	1	X	68979753	EDA	3'UTR-opensea
cg24187269	LUAD	male-bias	0.096869	7.29965	1.01389e-07	0.0378282	0.0612491	1	X	153533256	TKTL1	TSS200-opensea
cg25141133	LUAD	female-bias	-0.123565	-7.2968	1.0209e-07	0.0380898	-0.112353	1	X	12156437	FRMPD4	TSS200-shore
cg08057040	LUAD	male-bias	0.127725	7.28096	1.06072e-07	0.0395754	0.115028	1	X	77084159	MAGT1	3'UTR-opensea
cg19261513	LUAD	female-bias	-0.106998	-7.27947	1.06456e-07	0.0397187	-0.0138454	1	X	47057322	UBA1	5'UTR-shelf
cg16968020	LUAD	male-bias	0.129608	7.27656	1.07206e-07	0.0399984	0.0767033	1	X	151374946	GABRA3	Body-opensea
cg11913917	LUAD	male-bias	0.1656	7.26808	1.09428e-07	0.0408272	0.105551	1	X	104463622	TEX13A	3'UTR-opensea
cg19858323	LUAD	male-bias	0.16305	7.26279	1.10837e-07	0.0413532	0.13651	1	X	151283154	MAGEA5	3'UTR-opensea
cg07881342	LUAD	male-bias	0.0875475	7.25457	1.13065e-07	0.0421842	0.0579944	1	X	112087556		IGR-shelf
cg26362813	LUAD	male-bias	0.132043	7.2438	1.16052e-07	0.0432987	0.104382	1	X	153127938	L1CAM	3'UTR-opensea
cg11629919	LUAD	male-bias	0.118547	7.24222	1.16496e-07	0.0434646	-0.0597136	1	X	115594200	CXorf61	TSS200-opensea
cg14495593	LUAD	male-bias	0.0591573	7.24102	1.16836e-07	0.0435913	0.049753	1	X	27999546	DCAF8L1	5'UTR-opensea
cg08456124	LUAD	male-bias	0.0771164	7.21503	1.24432e-07	0.0464254	-0.00328277	1	X	11442350	ARHGAP6	Body-shelf
cg11188837	LUAD	male-bias	0.144779	7.20357	1.2794e-07	0.0477343	0.120091	1	X	103268309	H2BFWT	TSS200-island
cg16062292	LUAD	male-bias	0.122699	7.1989	1.29399e-07	0.0482785	0.108386	1	X	153558585	TKTL1	3'UTR-shelf
cg18512357	LUAD	male-bias	0.159563	7.18752	1.33025e-07	0.0496312	0.147839	1	X	69269901	AWAT2	TSS200-opensea
cg24825446	LUSC	female-bias	-0.226166	-38.1749	7.79197e-30	2.97721e-24	-0.0856189	1	X	25022499	ARX	3'UTR-island
cg06902764	LUSC	female-bias	-0.288946	-31.6438	4.26279e-27	1.62876e-21	-0.0842052	1	X	139586086	SOX3	1stExon-island
cg02912158	LUSC	female-bias	-0.329085	-30.7645	1.09216e-26	4.17299e-21	-0.094063	1	X	136649808	ZIC3	1stExon-island
cg06791102	LUSC	female-bias	-0.295699	-28.7556	1.0332e-25	3.94774e-20	-0.0624841	1	X	153191600	ARHGAP4	1stExon-island
cg25943872	LUSC	female-bias	-0.297179	-28.2229	1.92098e-25	7.33981e-20	-0.0570552	1	X	73642385	SLC16A2	Body-shore
cg26968501	LUSC	female-bias	-0.185808	-26.8869	9.55276e-25	3.64998e-19	-0.047933	1	X	82765734		IGR-island
cg00932276	LUSC	female-bias	-0.275012	-26.7092	1.18898e-24	4.54293e-19	-0.13251	1	X	13587976	EGFL6	5'UTR-island
cg19214916	LUSC	female-bias	-0.206444	-26.5177	1.50742e-24	5.75966e-19	-0.0637661	1	X	73642734	SLC16A2	Body-island
cg04308274	LUSC	female-bias	-0.283278	-25.9643	3.01901e-24	1.15353e-18	0.0310625	1	X	130207287	FLJ30058	5'UTR-island
cg16328412	LUSC	female-bias	-0.31186	-25.4138	6.10643e-24	2.33319e-18	-0.0740768	1	X	130423458	IGSF1	TSS200-opensea
cg04141767	LUSC	male-bias	0.183377	25.2586	7.46607e-24	2.85269e-18	0.0967542	1	X	147800037	AFF2	Body-opensea
cg27054331	LUSC	female-bias	-0.246177	-23.9509	4.25219e-23	1.62471e-17	0.00598956	1	X	152910369	DUSP9	5'UTR-shore
cg12976310	LUSC	male-bias	0.231018	23.6095	6.78996e-23	2.59436e-17	0.0487415	1	X	113865129	SNORA35	TSS200-opensea
cg25052176	LUSC	female-bias	-0.30483	-23.4562	8.3948e-23	3.20755e-17	0.0279808	1	X	54385662	WNK3	TSS1500-shore
cg04189697	LUSC	male-bias	0.159826	23.1616	1.2665e-22	4.83914e-17	0.0519878	1	X	153778656	IKBKG	5'UTR-shelf
cg26937310	LUSC	female-bias	-0.204019	-22.4535	3.46807e-22	1.3251e-16	-0.00368065	1	X	102531708	TCEAL5	1stExon-opensea
cg02059755	LUSC	male-bias	0.200413	22.2624	4.57399e-22	1.74766e-16	0.065775	1	X	65383371	HEPH	Body-opensea
cg15236541	LUSC	female-bias	-0.264453	-21.7881	9.17141e-22	3.50428e-16	-0.0950523	1	X	73642618	SLC16A2	Body-island
cg11595135	LUSC	female-bias	-0.239703	-21.1699	2.31681e-21	8.85222e-16	-0.0025715	1	X	136629694		IGR-island
cg23140620	LUSC	male-bias	0.224836	21.0591	2.74239e-21	1.04783e-15	0.0767441	1	X	110398983	PAK3	Body-opensea
cg09024810	LUSC	female-bias	-0.207185	-20.8535	3.75715e-21	1.43556e-15	-0.113602	1	X	130217041	FLJ30058	Body-shore
cg11179997	LUSC	female-bias	-0.210292	-20.3799	7.83827e-21	2.9949e-15	-0.125248	1	X	119125670		IGR-island
cg04077363	LUSC	female-bias	-0.306115	-20.0494	1.32094e-20	5.04716e-15	-0.0346136	1	X	102531881	TCEAL5	TSS200-opensea
cg03291819	LUSC	male-bias	0.126196	19.9924	1.4465e-20	5.52689e-15	0.0544	1	X	17874725	RAI2	5'UTR-shelf
cg21306973	LUSC	female-bias	-0.272317	-19.2814	4.57125e-20	1.74662e-14	-0.0569937	1	X	139584886		IGR-shore
cg11166197	LUSC	male-bias	0.237211	18.933	8.13799e-20	3.10942e-14	0.119676	1	X	151561584	GABRA3	5'UTR-opensea
cg16510657	LUSC	female-bias	-0.248732	-18.8895	8.75221e-20	3.3441e-14	-0.0265239	1	X	100333950	TMEM35	1stExon-opensea
cg09475041	LUSC	male-bias	0.186481	18.8811	8.87556e-20	3.39124e-14	-0.0162038	1	X	138612736	F9	TSS200-opensea
cg11932249	LUSC	female-bias	-0.196616	-18.8208	9.81734e-20	3.75108e-14	-0.114052	1	X	71524953	CITED1	5'UTR-island
cg22144149	LUSC	female-bias	-0.189625	-18.7668	1.07497e-19	4.1073e-14	0.0429222	1	X	39021732		IGR-island
cg10538243	LUSC	female-bias	-0.22855	-18.6016	1.42039e-19	5.42711e-14	-0.0287396	1	X	152910068	DUSP9	5'UTR-island
cg20641280	LUSC	female-bias	-0.338728	-18.4443	1.85556e-19	7.08984e-14	-0.113897	1	X	153707793	LAGE3	TSS200-island
cg03761894	LUSC	female-bias	-0.245996	-18.4265	1.91258e-19	7.30774e-14	-0.0521199	1	X	71527796	CITED1	TSS1500-shore
cg23116589	LUSC	female-bias	-0.199784	-18.4125	1.95878e-19	7.48426e-14	-0.102994	1	X	100805503	ARMCX1	TSS200-shelf
cg12947498	LUSC	female-bias	-0.25286	-18.3813	2.0661e-19	7.8943e-14	-0.0576534	1	X	100806397	ARMCX1	5'UTR-shore
cg02053896	LUSC	female-bias	-0.239396	-18.3448	2.19935e-19	8.40341e-14	-0.0602054	1	X	70151117	SLC7A3	TSS200-shore
cg14095733	LUSC	male-bias	0.169382	18.3149	2.3149e-19	8.84494e-14	0.00823751	1	X	27481558	SMEK3P	TSS200-opensea
cg04882894	LUSC	female-bias	-0.263095	-18.3078	2.34341e-19	8.95387e-14	-0.0698502	1	X	130423289	IGSF1	5'UTR-opensea
cg21990184	LUSC	female-bias	-0.219704	-18.3061	2.34992e-19	8.97874e-14	-0.0666412	1	X	107975941	IRS4	1stExon-island
cg10794473	LUSC	male-bias	0.110564	18.1054	3.3212e-19	1.26899e-13	0.0755291	1	X	63006350	MIR1468	TSS1500-opensea
cg00929476	LUSC	female-bias	-0.236321	-18.044	3.69366e-19	1.4113e-13	-0.0138451	1	X	136645736		IGR-shore
cg12553336	LUSC	male-bias	0.108612	17.8821	4.89737e-19	1.87122e-13	0.0631897	1	X	153090536	PDZD4	Body-shelf
cg12537796	LUSC	female-bias	-0.311486	-17.8077	5.57853e-19	2.13148e-13	-0.0760497	1	X	106515818		IGR-island
cg10501443	LUSC	female-bias	-0.13226	-17.7755	5.90283e-19	2.2554e-13	-0.0830101	1	X	114468791	LRCH2	TSS200-shore
cg09287459	LUSC	female-bias	-0.286146	-17.6779	7.00984e-19	2.67837e-13	-0.151094	1	X	39548787		IGR-shore
cg23499980	LUSC	female-bias	-0.194269	-17.6377	7.52643e-19	2.87575e-13	-0.0209381	1	X	122319148	GRIA3	Body-island
cg14464718	LUSC	female-bias	-0.275474	-17.6207	7.75564e-19	2.96333e-13	-0.0551234	1	X	100334126	TMEM35	Body-opensea
cg20950932	LUSC	female-bias	-0.257464	-17.5801	8.33396e-19	3.1843e-13	-0.102597	1	X	122317633	GRIA3	TSS1500-shore
cg18617708	LUSC	male-bias	0.176055	17.4822	9.91769e-19	3.78942e-13	0.0915564	1	X	105280566	SERPINA7	1stExon-opensea
cg24882168	LUSC	male-bias	0.0950778	17.4811	9.93695e-19	3.79678e-13	0.0918419	1	X	123467232		IGR-shore
cg06879828	LUSC	female-bias	-0.146169	-17.4415	1.06632e-18	4.07426e-13	-0.00866901	1	X	100333798	TMEM35	TSS200-opensea
cg05789980	LUSC	female-bias	-0.257544	-17.4407	1.06778e-18	4.07986e-13	-0.0188993	1	X	119442797	FAM70A	Body-shelf
cg13340269	LUSC	female-bias	-0.204536	-17.381	1.18792e-18	4.53888e-13	0.0158918	1	X	100333778	TMEM35	TSS200-opensea
cg24744459	LUSC	female-bias	-0.191579	-17.3152	1.33665e-18	5.10718e-13	-0.0308528	1	X	136649489	ZIC3	1stExon-island
cg09455225	LUSC	female-bias	-0.20612	-17.1307	1.86387e-18	7.1216e-13	-0.0415576	1	X	133684399		IGR-island
cg07570652	LUSC	female-bias	-0.157655	-17.1232	1.88928e-18	7.2187e-13	-0.082993	1	X	130216807	FLJ30058	Body-island
cg02818322	LUSC	male-bias	0.140757	17.1042	1.95539e-18	7.4713e-13	0.0945512	1	X	140926409	MAGEC3	Body-opensea
cg09703824	LUSC	female-bias	-0.209562	-17.0921	1.99869e-18	7.63672e-13	-0.0703677	1	X	107976020	IRS4	1stExon-island
cg26011743	LUSC	male-bias	0.22593	17.088	2.01383e-18	7.69458e-13	0.0799107	1	X	36794119		IGR-opensea
cg26117336	LUSC	male-bias	0.218399	17.0126	2.30919e-18	8.82311e-13	0.0457255	1	X	62574125		IGR-shelf
cg23914031	LUSC	male-bias	0.103533	16.9045	2.81271e-18	1.0747e-12	0.0152709	1	X	110036810	CHRDL1	5'UTR-shelf
cg02022247	LUSC	female-bias	-0.238779	-16.8264	3.24544e-18	1.24004e-12	-0.0212013	1	X	25029872	ARX	Body-shore
cg14933706	LUSC	female-bias	-0.226543	-16.7513	3.7261e-18	1.42369e-12	-0.12701	1	X	139584816		IGR-shore
cg23644934	LUSC	male-bias	0.247158	16.7315	3.86437e-18	1.47653e-12	0.0959217	1	X	109763406	TDGF3	TSS200-opensea
cg01609611	LUSC	female-bias	-0.169751	-16.6884	4.18447e-18	1.59883e-12	-0.00793158	1	X	136655880		IGR-shore
cg10743239	LUSC	female-bias	-0.250122	-16.6174	4.7722e-18	1.8234e-12	-0.0195057	1	X	130423167	IGSF1	5'UTR-opensea
cg26793903	LUSC	female-bias	-0.141022	-16.4332	6.72395e-18	2.56914e-12	-0.0503018	1	X	136629762		IGR-island
cg12162305	LUSC	female-bias	-0.359058	-16.4134	6.97765e-18	2.66607e-12	-0.0922038	1	X	130423207	IGSF1	5'UTR-opensea
cg17502810	LUSC	male-bias	0.162479	16.3773	7.46578e-18	2.85258e-12	0.0680223	1	X	39862172		IGR-shelf
cg07549474	LUSC	male-bias	0.125766	16.2475	9.52948e-18	3.64109e-12	0.039567	1	X	141293862	MAGEC2	TSS1500-opensea
cg13857811	LUSC	female-bias	-0.275954	-16.2372	9.71805e-18	3.71314e-12	-0.0640824	1	X	70151209	SLC7A3	TSS1500-shore
cg25685838	LUSC	male-bias	0.11979	16.1868	1.06885e-17	4.08395e-12	-0.00372935	1	X	69643844	GDPD2	5'UTR-opensea
cg17560693	LUSC	male-bias	0.188075	16.161	1.12228e-17	4.2881e-12	0.0220915	1	X	79269739	TBX22	TSS1500-opensea
cg24035953	LUSC	female-bias	-0.186112	-16.0605	1.35842e-17	5.19034e-12	-0.0900278	1	X	107976034	IRS4	1stExon-island
cg11267496	LUSC	female-bias	-0.231915	-15.8962	1.85927e-17	7.10401e-12	-0.172815	1	X	43833066	NDP	TSS200-opensea
cg23846114	LUSC	male-bias	0.111828	15.8614	1.98789e-17	7.59546e-12	0.0498384	1	X	150867161	PRRG3	5'UTR-shelf
cg17740587	LUSC	female-bias	-0.133691	-15.7741	2.35182e-17	8.986e-12	-0.101324	1	X	136651375	ZIC3	Body-island
cg10551631	LUSC	female-bias	-0.109878	-15.7529	2.45001e-17	9.36115e-12	-0.0347337	1	X	43832862	NDP	5'UTR-opensea
cg10474871	LUSC	male-bias	0.247928	15.6525	2.9758e-17	1.13701e-11	0.115478	1	X	103815487	IL1RAPL2	5'UTR-shelf
cg05078558	LUSC	male-bias	0.139598	15.6235	3.14834e-17	1.20294e-11	0.0856861	1	X	140269750		IGR-shore
cg18452672	LUSC	female-bias	-0.206819	-15.5529	3.61233e-17	1.38023e-11	-0.0441319	1	X	130423431	IGSF1	TSS200-opensea
cg04812084	LUSC	male-bias	0.0942914	15.4991	4.01269e-17	1.5332e-11	0.0567624	1	X	19819286	SH3KBP1	TSS1500-opensea
cg17488785	LUSC	male-bias	0.158061	15.4957	4.03962e-17	1.54349e-11	0.0814227	1	X	140009093	MIR320D2	TSS1500-opensea
cg20344820	LUSC	male-bias	0.197771	15.4274	4.61779e-17	1.7644e-11	0.0810694	1	X	114058123	HTR2C	Body-opensea
cg13397632	LUSC	female-bias	-0.283379	-15.2859	6.10193e-17	2.33147e-11	-0.0968084	1	X	106750861		IGR-island
cg00730224	LUSC	male-bias	0.108765	15.1967	7.28177e-17	2.78227e-11	0.0914579	1	X	140982540	MAGEC3	Body-opensea
cg13675050	LUSC	female-bias	-0.15996	-15.1248	8.40144e-17	3.21008e-11	0.00742739	1	X	136628604		IGR-shore
cg02629737	LUSC	female-bias	-0.199577	-14.9921	1.09531e-16	4.18503e-11	-0.0866591	1	X	138285540	FGF13	5'UTR-island
cg23476908	LUSC	male-bias	0.150791	14.8166	1.55963e-16	5.95915e-11	0.0907808	1	X	110365603	PAK3	TSS1500-opensea
cg03789606	LUSC	male-bias	0.203029	14.7831	1.66894e-16	6.37681e-11	-0.00422822	1	X	98999604	LOC442459	Body-opensea
cg12239742	LUSC	female-bias	-0.181074	-14.7298	1.85979e-16	7.10603e-11	-0.0400973	1	X	18116923		IGR-opensea
cg25602651	LUSC	male-bias	0.165753	14.5577	2.64191e-16	1.00944e-10	0.0793633	1	X	27999728	DCAF8L1	TSS200-opensea
cg07940804	LUSC	male-bias	0.136301	14.4802	3.09768e-16	1.18359e-10	0.0719942	1	X	127185902	ACTRT1	1stExon-opensea
cg06467636	LUSC	male-bias	0.163579	14.457	3.24898e-16	1.24139e-10	0.0477163	1	X	150905602	CNGA2	5'UTR-opensea
cg17822352	LUSC	female-bias	-0.241633	-14.3774	3.82924e-16	1.4631e-10	-0.0543743	1	X	102531965	TCEAL5	TSS200-opensea
cg11416605	LUSC	male-bias	0.102754	14.3357	4.17419e-16	1.5949e-10	0.0300131	1	X	63267928		IGR-shelf
cg04549977	LUSC	male-bias	0.0969303	14.2817	4.66947e-16	1.78414e-10	0.0665352	1	X	63613026	MTMR8	Body-shore
cg05902740	LUSC	male-bias	0.143069	14.2621	4.86399e-16	1.85847e-10	0.0650631	1	X	109698667	RGAG1	3'UTR-opensea
cg01383228	LUSC	female-bias	-0.174033	-14.2312	5.18634e-16	1.98163e-10	-0.150682	1	X	124336658		IGR-shore
cg25376316	LUSC	female-bias	-0.104912	-14.1937	5.60793e-16	2.14272e-10	-0.000303532	1	X	15756714	CA5B	5'UTR-shore
cg17542495	LUSC	male-bias	0.129488	14.1104	6.67504e-16	2.55045e-10	0.0830193	1	X	70443001	GJB1	TSS200-shore
cg01528835	LUSC	male-bias	0.0844024	14.0981	6.84947e-16	2.61709e-10	0.0822452	1	X	73438299	NCRNA00182	Body-opensea
cg10874556	LUSC	female-bias	-0.231385	-14.0849	7.04251e-16	2.69085e-10	-0.189544	1	X	100446569		IGR-island
cg23543821	LUSC	male-bias	0.106007	13.8749	1.09684e-15	4.19087e-10	0.0839511	1	X	120182714	GLUD2	1stExon-shore
cg11771863	LUSC	female-bias	-0.1881	-13.8697	1.10887e-15	4.23686e-10	-0.0437068	1	X	118893434	ANKRD58	1stExon-island
cg03523360	LUSC	male-bias	0.0967806	13.8618	1.12759e-15	4.30836e-10	0.0292429	1	X	79279581	TBX22	Body-opensea
cg24187351	LUSC	female-bias	-0.220517	-13.86	1.1321e-15	4.32559e-10	-0.0965736	1	X	68525883		IGR-island
cg04820200	LUSC	female-bias	-0.141925	-13.6493	1.77478e-15	6.78119e-10	-0.0692662	1	X	41191871	DDX3X	TSS1500-shore
cg14513082	LUSC	male-bias	0.0968803	13.6305	1.84796e-15	7.06083e-10	0.0886119	1	X	26210574	MAGEB6	5'UTR-opensea
cg20346189	LUSC	female-bias	-0.26984	-13.5652	2.12665e-15	8.12564e-10	-0.0986992	1	X	71524766	CITED1	5'UTR-shore
cg25549519	LUSC	male-bias	0.123916	13.4955	2.47143e-15	9.44302e-10	0.0076594	1	X	151306094	MAGEA10	5'UTR-opensea
cg07187723	LUSC	male-bias	0.116984	13.4834	2.53715e-15	9.69413e-10	0.0860432	1	X	110463862	PAK3	3'UTR-opensea
cg20648827	LUSC	female-bias	-0.303246	-13.4206	2.90702e-15	1.11073e-09	-0.117713	1	X	75005028	MAGEE2	5'UTR-opensea
cg24462545	LUSC	male-bias	0.161804	13.4104	2.97223e-15	1.13565e-09	0.0643969	1	X	30254216	MAGEB3	Body-opensea
cg15016628	LUSC	male-bias	0.130076	13.3943	3.0782e-15	1.17614e-09	0.0395757	1	X	135570188	BRS3	1stExon-opensea
cg11453483	LUSC	male-bias	0.143657	13.3708	3.2393e-15	1.23769e-09	0.118967	1	X	139791928	RP1-177G6.2	Body-opensea
cg17155263	LUSC	male-bias	0.0959148	13.3299	3.54104e-15	1.35298e-09	0.0473145	1	X	115594046	CXorf61	1stExon-opensea
cg23171231	LUSC	male-bias	0.143029	13.2521	4.1972e-15	1.6037e-09	0.119169	1	X	11672048	ARHGAP6	Body-opensea
cg05707218	LUSC	female-bias	-0.268519	-13.2135	4.56818e-15	1.74544e-09	-0.253469	1	X	153234476	HCFC1	Body-shore
cg03073000	LUSC	male-bias	0.18744	13.1588	5.15129e-15	1.96824e-09	0.0247274	1	X	130964931	LOC286467	TSS1500-opensea
cg17590101	LUSC	female-bias	-0.241281	-13.1196	5.61662e-15	2.14604e-09	-0.0730434	1	X	48327749	SLC38A5	5'UTR-opensea
cg08689445	LUSC	female-bias	-0.258096	-13.1081	5.76082e-15	2.20113e-09	-0.173195	1	X	106898504		IGR-opensea
cg06927864	LUSC	female-bias	-0.175177	-13.0908	5.98406e-15	2.28643e-09	-0.119418	1	X	28604661	IL1RAPL1	TSS1500-opensea
cg08021299	LUSC	male-bias	0.0721143	13.0536	6.49733e-15	2.48254e-09	0.00790459	1	X	65383076	HEPH	Body-opensea
cg07642259	LUSC	female-bias	-0.201852	-13.036	6.75561e-15	2.58123e-09	-0.158597	1	X	43833130	NDP	TSS1500-opensea
cg14719055	LUSC	female-bias	-0.144283	-13.0014	7.29424e-15	2.78703e-09	-0.0168459	1	X	16889683	RBBP7	TSS1500-shore
cg11315492	LUSC	male-bias	0.158038	12.9252	8.63929e-15	3.30096e-09	0.0361272	1	X	11153539		IGR-shelf
cg25691526	LUSC	male-bias	0.212727	12.9221	8.69888e-15	3.32373e-09	0.0252183	1	X	130964707	LOC286467	TSS200-opensea
cg04227026	LUSC	male-bias	0.161779	12.9127	8.88328e-15	3.39418e-09	0.0758973	1	X	150884661	FATE1	1stExon-opensea
cg22627750	LUSC	male-bias	0.113118	12.8362	1.05369e-14	4.026e-09	0.102329	1	X	50216175		IGR-shore
cg20495737	LUSC	female-bias	-0.253543	-12.8281	1.07299e-14	4.09974e-09	-0.0641369	1	X	48327768	SLC38A5	5'UTR-opensea
cg08611651	LUSC	female-bias	-0.249385	-12.8107	1.11562e-14	4.26262e-09	-0.10347	1	X	138285233	FGF13	5'UTR-shore
cg09912589	LUSC	male-bias	0.158178	12.8067	1.12573e-14	4.30128e-09	0.111257	1	X	112067795	AMOT	5'UTR-opensea
cg24822127	LUSC	male-bias	0.181261	12.7114	1.3944e-14	5.32782e-09	0.106563	1	X	150884331	FATE1	TSS200-opensea
cg10871046	LUSC	female-bias	-0.160559	-12.7049	1.41515e-14	5.4071e-09	-0.0551341	1	X	152587054		IGR-island
cg03832506	LUSC	male-bias	0.142026	12.6616	1.56017e-14	5.96121e-09	0.0851456	1	X	53286187	IQSEC2	Body-shelf
cg03665912	LUSC	female-bias	-0.203792	-12.6466	1.61383e-14	6.16624e-09	-0.042728	1	X	136511413		IGR-shore
cg04730443	LUSC	male-bias	0.147454	12.6134	1.73984e-14	6.64769e-09	0.0391933	1	X	26210529	MAGEB6	TSS200-opensea
cg26697633	LUSC	male-bias	0.119193	12.6127	1.7424e-14	6.65748e-09	0.0738689	1	X	85399112		IGR-shelf
cg18702893	LUSC	female-bias	-0.0923253	-12.5949	1.81427e-14	6.9321e-09	-0.0564426	1	X	136506825		IGR-shelf
cg08372291	LUSC	female-bias	-0.162506	-12.5944	1.81616e-14	6.93933e-09	-0.00260052	1	X	17674041	NHS	Body-island
cg22846914	LUSC	female-bias	-0.16106	-12.5911	1.82974e-14	6.9912e-09	-0.0742267	1	X	25041258		IGR-island
cg01951307	LUSC	male-bias	0.0815316	12.5282	2.11052e-14	8.06401e-09	0.0705226	1	X	133940723	FAM122C	TSS1500-opensea
cg03576235	LUSC	male-bias	0.109608	12.5092	2.20363e-14	8.41977e-09	0.0331632	1	X	26576430	VENTXP1	TSS200-shore
cg26328611	LUSC	male-bias	0.109168	12.491	2.29689e-14	8.77613e-09	0.0247178	1	X	65835992	EDA2R	TSS200-opensea
cg10602162	LUSC	female-bias	-0.235918	-12.4834	2.33729e-14	8.9305e-09	-0.0250264	1	X	153671800	GDI1	3'UTR-shore
cg25270089	LUSC	male-bias	0.123273	12.3838	2.9343e-14	1.12116e-08	0.0155777	1	X	153099097		IGR-shelf
cg02169289	LUSC	male-bias	0.130132	12.3111	3.467e-14	1.3247e-08	0.0831068	1	X	39967202	BCOR	5'UTR-island
cg10084932	LUSC	male-bias	0.0799977	12.2594	3.90475e-14	1.49195e-08	0.0786803	1	X	134571153		IGR-island
cg08195028	LUSC	female-bias	-0.107562	-12.2086	4.39044e-14	1.67753e-08	-0.0220821	1	X	15756631	CA5B	5'UTR-island
cg08276328	LUSC	male-bias	0.0982231	12.2014	4.46503e-14	1.70603e-08	0.0406521	1	X	140990738	MAGEC1	TSS1500-opensea
cg08421550	LUSC	male-bias	0.113759	12.1873	4.61224e-14	1.76228e-08	0.0620495	1	X	150883777	FATE1	TSS1500-opensea
cg26814883	LUSC	female-bias	-0.186817	-12.1615	4.897e-14	1.87108e-08	-0.0439903	1	X	70328127	CXorf65	TSS1500-opensea
cg21644660	LUSC	male-bias	0.130359	12.0588	6.21625e-14	2.37515e-08	0.0914052	1	X	108865686		IGR-shelf
cg08145178	LUSC	male-bias	0.115728	12.0114	6.94237e-14	2.65259e-08	0.0559513	1	X	103294452	MIR1256	Body-shore
cg23210456	LUSC	male-bias	0.161539	12.0026	7.08673e-14	2.70775e-08	0.10048	1	X	54785292	ITIH5L	Body-opensea
cg22873145	LUSC	female-bias	-0.170196	-11.9663	7.71449e-14	2.94761e-08	-0.0196472	1	X	100914906	ARMCX2	TSS200-opensea
cg17974767	LUSC	female-bias	-0.194203	-11.9557	7.90816e-14	3.0216e-08	-0.0616414	1	X	48690187	PCSK1N	Body-island
cg08645737	LUSC	female-bias	-0.221926	-11.9282	8.43408e-14	3.22255e-08	-0.0279232	1	X	82766491		IGR-shore
cg00692892	LUSC	male-bias	0.0771069	11.9054	8.89739e-14	3.39958e-08	0.0351878	1	X	150861833		IGR-shore
cg00673685	LUSC	male-bias	0.178844	11.794	1.15662e-13	4.41931e-08	0.0558806	1	X	111699191	ZCCHC16	3'UTR-opensea
cg10846614	LUSC	male-bias	0.164671	11.7801	1.19525e-13	4.56689e-08	0.00597447	1	X	150902317	CNGA2	TSS1500-opensea
cg00403724	LUSC	male-bias	0.155451	11.7673	1.23207e-13	4.7076e-08	0.0515671	1	X	99839289	TNMD	TSS1500-opensea
cg25530944	LUSC	male-bias	0.123074	11.7587	1.25739e-13	4.80434e-08	0.0210019	1	X	130964695	LOC286467	TSS200-opensea
cg16821267	LUSC	male-bias	0.0774736	11.7487	1.2875e-13	4.91939e-08	0.0246808	1	X	27840014	MAGEB10	Body-opensea
cg01396530	LUSC	female-bias	-0.273395	-11.7429	1.30521e-13	4.98704e-08	-0.0875163	1	X	12974262		IGR-opensea
cg26486175	LUSC	male-bias	0.189957	11.7118	1.40508e-13	5.36862e-08	0.106476	1	X	18658942	CDKL5	Body-opensea
cg09821007	LUSC	female-bias	-0.125168	-11.7031	1.43455e-13	5.48121e-08	-0.0631446	1	X	68348763		IGR-island
cg25731337	LUSC	male-bias	0.0696731	11.6996	1.44649e-13	5.52683e-08	0.0692617	1	X	151286477	MAGEA5	TSS200-opensea
cg13867326	LUSC	male-bias	0.209918	11.6882	1.48618e-13	5.67849e-08	0.130903	1	X	13821440	GPM6B	Body-opensea
cg07769622	LUSC	male-bias	0.0900802	11.683	1.50463e-13	5.74901e-08	0.0375212	1	X	27481498	SMEK3P	TSS200-opensea
cg00304884	LUSC	male-bias	0.0556159	11.6785	1.52089e-13	5.81112e-08	0.0308736	1	X	134569362		IGR-shore
cg01408682	LUSC	male-bias	0.0878479	11.6751	1.53298e-13	5.85733e-08	0.00537485	1	X	13063132	FAM9C	TSS1500-opensea
cg00206332	LUSC	male-bias	0.175276	11.6458	1.64365e-13	6.28018e-08	0.000163893	1	X	151140984	GABRE	Body-shore
cg16968020	LUSC	male-bias	0.132812	11.6436	1.65242e-13	6.3137e-08	0.109284	1	X	151374946	GABRA3	Body-opensea
cg17474651	LUSC	male-bias	0.0951151	11.6256	1.7247e-13	6.58985e-08	0.0849405	1	X	140925194	MAGEC3	TSS1500-opensea
cg01138740	LUSC	male-bias	0.0756297	11.6232	1.73482e-13	6.62851e-08	0.0713429	1	X	137946672	FGF13	5'UTR-opensea
cg11655867	LUSC	male-bias	0.122284	11.5977	1.8432e-13	7.04261e-08	0.101835	1	X	12513550	FRMPD4	Body-opensea
cg13530507	LUSC	female-bias	-0.0953404	-11.5961	1.85029e-13	7.06972e-08	-0.00850367	1	X	54833796	MAGED2	TSS1500-shore
cg16149200	LUSC	male-bias	0.126556	11.5686	1.97602e-13	7.55013e-08	0.085655	1	X	120183084	GLUD2	1stExon-shore
cg04598760	LUSC	male-bias	0.0887514	11.5595	2.0193e-13	7.71548e-08	0.0303906	1	X	103083533	RAB9B	5'UTR-shelf
cg06892157	LUSC	male-bias	0.0997945	11.5571	2.03119e-13	7.76093e-08	0.0590341	1	X	129084138		IGR-shelf
cg25445853	LUSC	female-bias	-0.139447	-11.5434	2.09881e-13	8.01928e-08	-0.0728876	1	X	135230696	FHL1	Body-shore
cg17928317	LUSC	male-bias	0.111116	11.5403	2.11429e-13	8.07841e-08	0.0574919	1	X	140982278	MAGEC3	Body-opensea
cg01490258	LUSC	male-bias	0.198497	11.5213	2.21289e-13	8.45516e-08	0.117245	1	X	40030456	BCOR	5'UTR-shore
cg20201673	LUSC	female-bias	-0.155231	-11.4987	2.33572e-13	8.92447e-08	-0.0181468	1	X	130206879	FLJ30058	5'UTR-shore
cg14592807	LUSC	male-bias	0.116856	11.4969	2.3462e-13	8.96452e-08	0.0515762	1	X	27481416	SMEK3P	Body-opensea
cg12856407	LUSC	female-bias	-0.175294	-11.4953	2.35489e-13	8.99774e-08	-0.0937188	1	X	78622565	ITM2A	Body-opensea
cg04646630	LUSC	male-bias	0.0791227	11.4905	2.38211e-13	9.10173e-08	0.019381	1	X	30233581	MAGEB2	TSS200-opensea
cg21459545	LUSC	female-bias	-0.151145	-11.467	2.52051e-13	9.63053e-08	-0.0862914	1	X	153637814	DNASE1L1	5'UTR-shore
cg15892676	LUSC	male-bias	0.0722166	11.4042	2.93204e-13	1.12029e-07	0.0639341	1	X	63444159	ASB12	3'UTR-opensea
cg05565735	LUSC	male-bias	0.117083	11.3851	3.0699e-13	1.17297e-07	0.0723378	1	X	119869295		IGR-shelf
cg15604615	LUSC	male-bias	0.0991371	11.3609	3.2549e-13	1.24366e-07	0.0609291	1	X	150866552	PRRG3	TSS1500-shelf
cg27256435	LUSC	female-bias	-0.14754	-11.3342	3.47139e-13	1.32637e-07	-0.0784738	1	X	114468596	LRCH2	1stExon-shore
cg13095698	LUSC	male-bias	0.111823	11.275	4.0075e-13	1.53121e-07	0.0464525	1	X	84364580	SATL1	TSS1500-opensea
cg13223227	LUSC	female-bias	-0.142698	-11.2503	4.25441e-13	1.62556e-07	-0.101544	1	X	43741310	MAOB	Body-island
cg13316877	LUSC	male-bias	0.120568	11.215	4.63592e-13	1.77132e-07	0.0805159	1	X	71364210	FLJ44635	1stExon-opensea
cg16255697	LUSC	male-bias	0.116437	11.214	4.64775e-13	1.77585e-07	-0.00283975	1	X	113997530	HTR2C	Body-opensea
cg21870760	LUSC	male-bias	0.127031	11.2052	4.74838e-13	1.81429e-07	0.041972	1	X	149395936	MIR2114	TSS1500-opensea
cg17221316	LUSC	male-bias	0.0535987	11.1874	4.95866e-13	1.89464e-07	-0.00198698	1	X	137700841	LOC158696	TSS1500-opensea
cg10647025	LUSC	male-bias	0.161521	11.1793	5.05784e-13	1.93254e-07	0.0435558	1	X	145079517	MIR892A	TSS1500-opensea
cg20967299	LUSC	male-bias	0.094293	11.1598	5.30351e-13	2.0264e-07	0.0890461	1	X	68833308		IGR-shelf
cg06625174	LUSC	female-bias	-0.10151	-11.1112	5.97333e-13	2.28233e-07	0.0322859	1	X	153979792	GAB3	TSS1500-shore
cg00768439	LUSC	female-bias	-0.0679246	-11.0816	6.42271e-13	2.45403e-07	-0.0283393	1	X	92928711	FAM133A	TSS1500-island
cg10448608	LUSC	female-bias	-0.22044	-11.0633	6.71684e-13	2.56642e-07	-0.0377886	1	X	144903748	SLITRK2	5'UTR-island
cg19169658	LUSC	male-bias	0.149494	11.009	7.67624e-13	2.93299e-07	0.0188074	1	X	114423840	RBMXL3	TSS200-shore
cg15854666	LUSC	female-bias	-0.153053	-11.0085	7.68568e-13	2.9366e-07	-0.086534	1	X	25029360	ARX	Body-shore
cg05361475	LUSC	male-bias	0.0912954	10.9799	8.24524e-13	3.1504e-07	0.0679798	1	X	74744538	ZDHHC15	TSS1500-shore
cg13661446	LUSC	male-bias	0.0792587	10.9601	8.65823e-13	3.3082e-07	0.0618895	1	X	151093031	MAGEA4	Body-opensea
cg20469935	LUSC	male-bias	0.134027	10.9544	8.78012e-13	3.35477e-07	-0.0099049	1	X	130964757	LOC286467	TSS200-opensea
cg04093132	LUSC	male-bias	0.0783544	10.8967	1.01255e-12	3.86884e-07	0.0173244	1	X	69282176	OTUD6A	TSS200-shore
cg11307246	LUSC	male-bias	0.0649932	10.8508	1.13455e-12	4.33496e-07	0.0303335	1	X	102319998	BEX1	TSS1500-shore
cg21908878	LUSC	male-bias	0.077511	10.8474	1.14422e-12	4.3719e-07	0.0621559	1	X	23017887	DDX53	TSS200-opensea
cg13225177	LUSC	female-bias	-0.196102	-10.821	1.22181e-12	4.66839e-07	-0.0875098	1	X	136509076		IGR-shore
cg20795578	LUSC	female-bias	-0.179923	-10.8195	1.22616e-12	4.685e-07	-0.116918	1	X	136632532		IGR-island
cg26598396	LUSC	female-bias	-0.166548	-10.7747	1.3707e-12	5.23728e-07	-0.0365693	1	X	136511135		IGR-shore
cg10436191	LUSC	male-bias	0.141977	10.774	1.37313e-12	5.24656e-07	0.0215667	1	X	113865353	SNORA35	Body-opensea
cg11834527	LUSC	male-bias	0.161108	10.7388	1.49898e-12	5.7274e-07	0.123551	1	X	149008828	MAGEA8	TSS1500-opensea
cg19858323	LUSC	male-bias	0.119015	10.7314	1.5271e-12	5.83486e-07	0.065583	1	X	151283154	MAGEA5	3'UTR-opensea
cg06742180	LUSC	male-bias	0.16221	10.7185	1.57706e-12	6.02573e-07	0.107932	1	X	123039177	XIAP	Body-opensea
cg06452970	LUSC	male-bias	0.163444	10.6867	1.70762e-12	6.5246e-07	0.123696	1	X	13835264	GPM6B	1stExon-opensea
cg14745824	LUSC	male-bias	0.145273	10.6858	1.71134e-12	6.53882e-07	0.0234176	1	X	68979753	EDA	3'UTR-opensea
cg05706696	LUSC	female-bias	-0.165803	-10.6762	1.75288e-12	6.69751e-07	-0.160884	1	X	129254556		IGR-island
cg25737241	LUSC	male-bias	0.100291	10.6636	1.80934e-12	6.91325e-07	0.0372969	1	X	43739887	MAOB	Body-shore
cg04174234	LUSC	male-bias	0.096252	10.6529	1.85824e-12	7.10009e-07	0.042679	1	X	15364248	FIGF	3'UTR-opensea
cg17710066	LUSC	female-bias	-0.137055	-10.6488	1.87762e-12	7.17415e-07	-0.0419806	1	X	18373455	SCML2	TSS1500-shore
cg02150469	LUSC	female-bias	-0.136283	-10.6416	1.91186e-12	7.30496e-07	-0.0541475	1	X	70327995	CXorf65	TSS1500-opensea
cg18418655	LUSC	female-bias	-0.215755	-10.6207	2.01463e-12	7.69763e-07	-0.0776939	1	X	70331557	IL2RG	TSS200-opensea
cg02814558	LUSC	male-bias	0.0577214	10.5877	2.18856e-12	8.36219e-07	0.0417991	1	X	150867810	PRRG3	Body-shelf
cg10060499	LUSC	female-bias	-0.141712	-10.5464	2.42875e-12	9.27994e-07	-0.0440913	1	X	39378734		IGR-opensea
cg15232885	LUSC	male-bias	0.14565	10.5255	2.5601e-12	9.78179e-07	0.0968929	1	X	140925367	MAGEC3	TSS1500-opensea
cg21153181	LUSC	female-bias	-0.221609	-10.4743	2.91377e-12	1.11331e-06	-0.110115	1	X	153637497	DNASE1L1	5'UTR-shelf
cg26563418	LUSC	male-bias	0.135464	10.4528	3.07607e-12	1.17532e-06	0.11918	1	X	130204910	FLJ30058	5'UTR-shelf
cg25373998	LUSC	female-bias	-0.162169	-10.4493	3.10372e-12	1.18589e-06	0.00184687	1	X	70363458	NLGN3	TSS1500-opensea
cg03664928	LUSC	female-bias	-0.238022	-10.4318	3.24409e-12	1.23953e-06	-0.0730455	1	X	53029937		IGR-island
cg09140084	LUSC	male-bias	0.0860905	10.4253	3.29832e-12	1.26025e-06	0.0704804	1	X	140990878	MAGEC1	TSS1500-opensea
cg26024941	LUSC	male-bias	0.0790002	10.4161	3.37612e-12	1.28997e-06	0.0394509	1	X	16166956	GRPR	Body-opensea
cg10089642	LUSC	male-bias	0.11337	10.3987	3.52903e-12	1.3484e-06	0.0232451	1	X	122870376		IGR-shelf
cg05414556	LUSC	female-bias	-0.111453	-10.3898	3.60891e-12	1.37892e-06	-0.00182281	1	X	128913922	SASH3	1stExon-opensea
cg16975045	LUSC	male-bias	0.0781416	10.3594	3.89908e-12	1.48979e-06	0.0627231	1	X	71936863		IGR-shelf
cg15715746	LUSC	male-bias	0.0649042	10.3569	3.92458e-12	1.49953e-06	0.0184662	1	X	30233589	MAGEB2	TSS200-opensea
cg15198729	LUSC	female-bias	-0.155544	-10.3509	3.98415e-12	1.52229e-06	-0.110517	1	X	100446496		IGR-island
cg12544401	LUSC	male-bias	0.225716	10.3455	4.03996e-12	1.54362e-06	0.100398	1	X	103291721	MIR1256	Body-shelf
cg27424407	LUSC	female-bias	-0.120716	-10.3418	4.07768e-12	1.55803e-06	-0.114061	1	X	34674190	TMEM47	Body-shore
cg20063650	LUSC	male-bias	0.0792606	10.2824	4.74494e-12	1.81298e-06	0.0733291	1	X	22290920	ZNF645	TSS200-opensea
cg18727700	LUSC	male-bias	0.104733	10.2772	4.80836e-12	1.83721e-06	0.00516982	1	X	99898930	SRPX2	TSS1500-opensea
cg26028155	LUSC	male-bias	0.0831291	10.2565	5.06949e-12	1.93699e-06	0.0665303	1	X	41334113	NYX	Body-island
cg26310256	LUSC	female-bias	-0.163042	-10.2305	5.41866e-12	2.0704e-06	-0.0415377	1	X	13588301	EGFL6	Body-shore
cg24834461	LUSC	female-bias	-0.140472	-10.2189	5.58216e-12	2.13287e-06	-0.0886397	1	X	153637645	DNASE1L1	TSS200-shelf
cg09614279	LUSC	male-bias	0.14931	10.1952	5.93242e-12	2.2667e-06	0.143456	1	X	84189578	UBE2DNL	Body-island
cg17876443	LUSC	female-bias	-0.185795	-10.1856	6.08018e-12	2.32316e-06	0.0565682	1	X	136646775		IGR-shore
cg05059994	LUSC	female-bias	-0.0680256	-10.1852	6.08525e-12	2.3251e-06	-0.0215591	1	X	15755989	CA5B	TSS1500-shore
cg06293983	LUSC	female-bias	-0.186238	-10.1789	6.18467e-12	2.36308e-06	-0.0389448	1	X	135863104	ARHGEF6	5'UTR-opensea
cg01852560	LUSC	female-bias	-0.186332	-10.1767	6.22046e-12	2.37676e-06	-0.0474926	1	X	68348839		IGR-shore
cg20258249	LUSC	male-bias	0.0991152	10.1612	6.4732e-12	2.47333e-06	0.0329765	1	X	64774985		IGR-shelf
cg12323723	LUSC	female-bias	-0.0883644	-10.1408	6.82203e-12	2.60661e-06	-0.0677252	1	X	136656581		IGR-island
cg02994237	LUSC	male-bias	0.170097	10.1358	6.9094e-12	2.63999e-06	0.0439596	1	X	137750892	FGF13	Body-opensea
cg07756708	LUSC	male-bias	0.0348651	10.1308	6.99845e-12	2.67402e-06	0.00600248	1	X	63617742		IGR-shelf
cg03184366	LUSC	female-bias	-0.166857	-10.123	7.14121e-12	2.72857e-06	-0.0848973	1	X	9984977	WWC3	5'UTR-shore
cg07419680	LUSC	female-bias	-0.156477	-10.1097	7.39002e-12	2.82363e-06	0.00534865	1	X	134429972	ZNF75D	5'UTR-shore
cg00780578	LUSC	male-bias	0.160131	10.0877	7.82173e-12	2.98858e-06	0.0957039	1	X	68727150	FAM155B	Body-shore
cg01598357	LUSC	female-bias	-0.137418	-10.0814	7.94884e-12	3.03715e-06	-0.00872279	1	X	69664317	DLG3	TSS1500-shore
cg13817994	LUSC	female-bias	-0.134145	-10.0762	8.05614e-12	3.07815e-06	-0.0391856	1	X	152600484	ZNF275	5'UTR-shore
cg17920239	LUSC	male-bias	0.0685242	10.0751	8.07994e-12	3.08724e-06	0.0493104	1	X	102191907	RAB40AL	TSS1500-shore
cg07198345	LUSC	male-bias	0.0878388	10.0736	8.1118e-12	3.09941e-06	0.0292678	1	X	65382828	HEPH	Body-opensea
cg19794163	LUSC	female-bias	-0.169044	-10.0402	8.84287e-12	3.37874e-06	-0.11677	1	X	152157977	PNMA5	3'UTR-opensea
cg25131597	LUSC	male-bias	0.137479	10.0368	8.92006e-12	3.40824e-06	0.102599	1	X	67423243	OPHN1	Body-opensea
cg19045344	LUSC	male-bias	0.168848	10.0347	8.96795e-12	3.42654e-06	0.0807235	1	X	84364350	SATL1	TSS1500-opensea
cg01843978	LUSC	male-bias	0.182818	10.0204	9.3065e-12	3.55589e-06	0.118105	1	X	49772184	CLCN5	Body-opensea
cg19227523	LUSC	male-bias	0.13916	10.0189	9.34386e-12	3.57017e-06	-0.0215744	1	X	128872002	XPNPEP2	TSS1500-opensea
cg03130686	LUSC	male-bias	0.0675353	10.003	9.73504e-12	3.71963e-06	0.0572186	1	X	64708843	ZC3H12B	1stExon-opensea
cg17733714	LUSC	female-bias	-0.142909	-9.98808	1.01199e-11	3.86668e-06	-0.10708	1	X	68114285		IGR-shore
cg06739534	LUSC	male-bias	0.111554	9.9871	1.01456e-11	3.87651e-06	0.0714559	1	X	119863043		IGR-shelf
cg02447370	LUSC	female-bias	-0.145904	-9.98343	1.02427e-11	3.91361e-06	-0.106115	1	X	132092772	HS6ST2	5'UTR-shore
cg19271175	LUSC	male-bias	0.0694408	9.93621	1.15784e-11	4.42397e-06	-0.0369422	1	X	153188760	ARHGAP4	Body-shelf
cg03455762	LUSC	female-bias	-0.168925	-9.86462	1.39514e-11	5.33066e-06	-0.0030016	1	X	128873475	XPNPEP2	Body-opensea
cg01854931	LUSC	male-bias	0.0898081	9.85456	1.43225e-11	5.47244e-06	0.0190897	1	X	122321985	GRIA3	Body-shelf
cg11629919	LUSC	male-bias	0.0654434	9.84946	1.45144e-11	5.54576e-06	0.0547959	1	X	115594200	CXorf61	TSS200-opensea
cg14349394	LUSC	male-bias	0.154472	9.84157	1.48166e-11	5.66122e-06	0.0891587	1	X	119151773		IGR-shelf
cg04688815	LUSC	male-bias	0.0847842	9.83404	1.51111e-11	5.77374e-06	0.0811175	1	X	18908285	LOC100132163	TSS200-opensea
cg02586883	LUSC	female-bias	-0.117375	-9.82687	1.53968e-11	5.88292e-06	-0.0718254	1	X	21393898	CNKSR2	Body-shore
cg13328614	LUSC	female-bias	-0.197817	-9.81758	1.57752e-11	6.0275e-06	-0.136345	1	X	48775123	PIM2	Body-shore
cg15365038	LUSC	female-bias	-0.175403	-9.734	1.96376e-11	7.50327e-06	-0.0488049	1	X	48930360	PRAF2	Body-island
cg13122496	LUSC	male-bias	0.239913	9.72933	1.988e-11	7.5959e-06	0.0515991	1	X	66788286	AR	TSS1500-opensea
cg10058095	LUSC	male-bias	0.0994019	9.72676	2.00148e-11	7.6474e-06	0.0370864	1	X	125301098	DCAF12L2	TSS1500-shore
cg16410962	LUSC	female-bias	-0.180183	-9.72238	2.02462e-11	7.7358e-06	-0.0936679	1	X	151139612	GABRE	Body-shelf
cg09278708	LUSC	female-bias	-0.157775	-9.7171	2.05295e-11	7.84405e-06	-0.156346	1	X	101905837	GPRASP1	TSS1500-shore
cg22845087	LUSC	female-bias	-0.181173	-9.70528	2.11774e-11	8.09162e-06	-0.127261	1	X	47433922	SYN1	Body-island
cg23387422	LUSC	female-bias	-0.154731	-9.69212	2.1923e-11	8.37649e-06	-0.0815293	1	X	153637603	DNASE1L1	TSS200-shelf
cg02514307	LUSC	male-bias	0.0970184	9.68653	2.22479e-11	8.50064e-06	0.0811024	1	X	148716330		IGR-shelf
cg03990195	LUSC	male-bias	0.0815935	9.66598	2.34849e-11	8.97327e-06	0.0334989	1	X	113625050		IGR-island
cg02733659	LUSC	female-bias	-0.188885	-9.65602	2.41095e-11	9.21194e-06	-0.0626169	1	X	103500874	ESX1	TSS1500-shore
cg27189967	LUSC	male-bias	0.0669495	9.65316	2.42924e-11	9.28181e-06	0.0574253	1	X	151821766	GABRQ	3'UTR-opensea
cg15855671	LUSC	female-bias	-0.205354	-9.64329	2.49329e-11	9.52655e-06	-0.0497089	1	X	135863688	ARHGEF6	TSS200-opensea
cg11662345	LUSC	male-bias	0.0760388	9.64241	2.49905e-11	9.54856e-06	0.00544372	1	X	65381074	HEPH	TSS1500-opensea
cg00141845	LUSC	female-bias	-0.233096	-9.60777	2.73843e-11	1.04632e-05	-0.0938248	1	X	74493352	UPRT	TSS1500-opensea
cg10786986	LUSC	male-bias	0.100835	9.53975	3.27862e-11	1.25272e-05	-0.0426785	1	X	13711087	RAB9A	5'UTR-shelf
cg21493591	LUSC	female-bias	-0.0726018	-9.50113	3.6324e-11	1.38789e-05	-0.0480198	1	X	24169729	ZFX	TSS200-shore
cg13814975	LUSC	male-bias	0.0625558	9.48908	3.75064e-11	1.43307e-05	0.0225071	1	X	30264853	MAGEB1	5'UTR-shore
cg03305185	LUSC	female-bias	-0.151663	-9.45511	4.1053e-11	1.56858e-05	0.0422879	1	X	134429653	ZNF75D	5'UTR-island
cg03934360	LUSC	male-bias	0.175625	9.44696	4.19542e-11	1.60302e-05	0.0946193	1	X	117859585		IGR-shore
cg01737550	LUSC	male-bias	0.154967	9.42832	4.40895e-11	1.6846e-05	0.033351	1	X	101395217	TCEAL6	3'UTR-shelf
cg22539189	LUSC	male-bias	0.0828554	9.41846	4.52651e-11	1.72952e-05	0.0276049	1	X	2746420	GYG2	TSS1500-shore
cg15737470	LUSC	female-bias	-0.13137	-9.41665	4.54833e-11	1.73786e-05	-0.0487393	1	X	10124914	CLCN4	TSS200-shore
cg10479992	LUSC	male-bias	0.050688	9.38099	5.00269e-11	1.91146e-05	0.0178394	1	X	50652739	BMP15	TSS1500-opensea
cg11019134	LUSC	male-bias	0.122868	9.36577	5.21038e-11	1.99082e-05	0.117572	1	X	64772618		IGR-shore
cg02836821	LUSC	male-bias	0.159453	9.35766	5.32459e-11	2.03446e-05	0.0225516	1	X	132095360	HS6ST2	5'UTR-shelf
cg00813999	LUSC	female-bias	-0.207342	-9.34244	5.54595e-11	2.11904e-05	0.0137302	1	X	77582839	CYSLTR1	5'UTR-opensea
cg23092775	LUSC	male-bias	0.175831	9.33111	5.71668e-11	2.18427e-05	0.0783339	1	X	117857613		IGR-shelf
cg12705541	LUSC	male-bias	0.148849	9.32292	5.84355e-11	2.23275e-05	0.0586775	1	X	75245844		IGR-shelf
cg19566414	LUSC	female-bias	-0.186984	-9.30728	6.09378e-11	2.32835e-05	-0.0178406	1	X	130423448	IGSF1	TSS200-opensea
cg01818727	LUSC	male-bias	0.178629	9.29145	6.35814e-11	2.42936e-05	0.120127	1	X	19137817	GPR64	5'UTR-shelf
cg05580931	LUSC	male-bias	0.116155	9.28534	6.4632e-11	2.4695e-05	0.063664	1	X	15683218	TMEM27	TSS200-opensea
cg14375772	LUSC	male-bias	0.0962101	9.28405	6.48562e-11	2.47807e-05	0.0161297	1	X	120181969	GLUD2	1stExon-island
cg03793368	LUSC	male-bias	0.135135	9.28147	6.53067e-11	2.49528e-05	0.056349	1	X	141293344	MAGEC2	TSS1500-opensea
cg08266027	LUSC	male-bias	0.0989151	9.2336	7.42746e-11	2.83793e-05	0.023855	1	X	118736960	NKRF	5'UTR-shelf
cg26140836	LUSC	male-bias	0.168476	9.21594	7.78928e-11	2.97618e-05	0.0503375	1	X	108870738		IGR-shelf
cg05892376	LUSC	female-bias	-0.222718	-9.21235	7.86487e-11	3.00507e-05	-0.0475427	1	X	135862961	ARHGEF6	1stExon-opensea
cg16735667	LUSC	male-bias	0.0871912	9.20728	7.973e-11	3.04638e-05	0.0413582	1	X	66788193	AR	TSS1500-opensea
cg12496982	LUSC	male-bias	0.0804597	9.20428	8.0377e-11	3.0711e-05	0.0230919	1	X	30264626	MAGEB1	5'UTR-shore
cg16797340	LUSC	female-bias	-0.114957	-9.15545	9.16954e-11	3.50356e-05	0.00937695	1	X	135225923		IGR-shelf
cg12950441	LUSC	female-bias	-0.044959	-9.1529	9.233e-11	3.52781e-05	-0.010527	1	X	113818537	HTR2C	TSS200-island
cg21138857	LUSC	male-bias	0.0795177	9.12757	9.88734e-11	3.77783e-05	0.0544423	1	X	18240404	BEND2	TSS1500-shore
cg22969541	LUSC	female-bias	-0.168321	-9.04895	1.22349e-10	4.67479e-05	-0.107667	1	X	149736453	MTM1	TSS1500-shore
cg12901451	LUSC	female-bias	-0.136593	-9.02583	1.30279e-10	4.97778e-05	-0.0409245	1	X	48620161	GLOD5	1stExon-opensea
cg00926894	LUSC	female-bias	-0.146349	-9.025	1.30576e-10	4.98914e-05	-0.0309226	1	X	46938229	RGN	5'UTR-shore
cg05190630	LUSC	male-bias	0.101102	9.02036	1.32231e-10	5.05237e-05	0.0127367	1	X	84634433	POF1B	Body-opensea
cg09626131	LUSC	female-bias	-0.122004	-8.96651	1.53106e-10	5.84997e-05	-0.0375523	1	X	82764537	POU3F4	3'UTR-shore
cg26668105	LUSC	male-bias	0.114117	8.96494	1.53766e-10	5.87519e-05	0.0741906	1	X	154059788	LOC100132963	5'UTR-opensea
cg13713253	LUSC	male-bias	0.0985032	8.96161	1.55166e-10	5.92868e-05	0.0856147	1	X	71128586		IGR-shelf
cg25896901	LUSC	female-bias	-0.194897	-8.95929	1.56151e-10	5.96632e-05	-0.138392	1	X	125300481	DCAF12L2	TSS1500-shore
cg11868755	LUSC	female-bias	-0.0889959	-8.95292	1.58886e-10	6.07084e-05	-0.0424346	1	X	152786600		IGR-shelf
cg04064672	LUSC	male-bias	0.0593227	8.92044	1.73614e-10	6.63358e-05	0.0250124	1	X	141290567	MAGEC2	3'UTR-opensea
cg00688681	LUSC	female-bias	-0.163653	-8.88431	1.91639e-10	7.32228e-05	-0.139359	1	X	53030043		IGR-island
cg12268565	LUSC	female-bias	-0.166582	-8.88302	1.92315e-10	7.34811e-05	-0.0355339	1	X	133685325		IGR-island
cg08291487	LUSC	male-bias	0.132793	8.88297	1.92344e-10	7.3492e-05	0.0484304	1	X	145075914	MIR890	TSS200-opensea
cg24389412	LUSC	female-bias	-0.155774	-8.87984	1.93994e-10	7.41227e-05	0.0677219	1	X	70323743	CXorf65	Body-opensea
cg21283832	LUSC	female-bias	-0.172554	-8.87672	1.9566e-10	7.47592e-05	0.033064	1	X	152680754		IGR-shelf
cg07343739	LUSC	female-bias	-0.169464	-8.84104	2.15749e-10	8.2435e-05	-0.152749	1	X	46617524	SLC9A7	Body-shore
cg04593531	LUSC	male-bias	0.138182	8.8368	2.18272e-10	8.33988e-05	0.0328316	1	X	137700748	LOC158696	TSS1500-opensea
cg07989638	LUSC	male-bias	0.0766326	8.79891	2.4219e-10	9.25378e-05	0.0407047	1	X	39020371		IGR-shore
cg25541754	LUSC	male-bias	0.102573	8.7789	2.55882e-10	9.77693e-05	0.0779874	1	X	18908258	LOC100132163	TSS200-opensea
cg05131629	LUSC	male-bias	0.165291	8.77872	2.5601e-10	9.78181e-05	0.0489323	1	X	41307114	NYX	5'UTR-opensea
cg09773769	LUSC	female-bias	-0.180459	-8.77264	2.60324e-10	9.94664e-05	0.0675792	1	X	132547387	GPC4	Body-shore
cg17385225	LUSC	male-bias	0.0822187	8.76656	2.64713e-10	0.000101144	0.0184662	1	X	118750273	2024-09-06	3'UTR-opensea
cg13482233	LUSC	male-bias	0.118465	8.75378	2.74189e-10	0.000104764	0.0360617	1	X	65382529	HEPH	5'UTR-opensea
cg00168417	LUSC	male-bias	0.103983	8.74101	2.84004e-10	0.000108514	0.046027	1	X	118285788	KIAA1210	TSS1500-shore
cg17458755	LUSC	male-bias	0.0370824	8.70778	3.11244e-10	0.000118922	0.0203701	1	X	153220861	HCFC1	Body-shore
cg15554342	LUSC	male-bias	0.0517884	8.70573	3.13005e-10	0.000119595	0.0387284	1	X	49046065	SYP	3'UTR-shore
cg26383972	LUSC	female-bias	-0.16795	-8.65073	3.64361e-10	0.000139218	-0.00344615	1	X	113817409	HTR2C	TSS1500-shore
cg21306843	LUSC	female-bias	-0.235733	-8.64754	3.67592e-10	0.000140452	-0.10553	1	X	72666536	CDX4	TSS1500-shore
cg02275875	LUSC	female-bias	-0.114141	-8.64377	3.71439e-10	0.000141922	-0.00691962	1	X	102531009	TCEAL5	5'UTR-opensea
cg05335577	LUSC	female-bias	-0.171716	-8.63907	3.763e-10	0.000143779	-0.0566236	1	X	70331493	IL2RG	TSS200-opensea
cg11189761	LUSC	male-bias	0.12192	8.59728	4.22473e-10	0.000161421	0.0213703	1	X	66763113	AR	TSS1500-shore
cg07628841	LUSC	female-bias	-0.0687452	-8.57492	4.49502e-10	0.000171749	-0.0437659	1	2	27851430	GPN1	TSS200-opensea
cg08729658	LUSC	female-bias	-0.138488	-8.53211	5.06261e-10	0.000193436	-0.0796347	1	X	17674676	NHS	Body-shore
cg09687738	LUSC	female-bias	-0.126843	-8.52128	5.21752e-10	0.000199355	-0.0756651	1	X	113818934	HTR2C	5'UTR-island
cg08458068	LUSC	female-bias	-0.127523	-8.5208	5.22451e-10	0.000199622	-0.0072362	1	X	102532056	TCEAL5	TSS1500-opensea
cg05240083	LUSC	female-bias	-0.104717	-8.50857	5.40526e-10	0.000206528	-0.0252172	1	X	117629034	DOCK11	TSS1500-shore
cg02167358	LUSC	male-bias	0.134648	8.49512	5.61147e-10	0.000214407	0.0355248	1	X	15871902	AP1S2	5'UTR-shore
cg26790627	LUSC	male-bias	0.0377904	8.47681	5.90522e-10	0.000225631	0.0150533	1	X	125685712	DCAF12L1	1stExon-island
cg20017658	LUSC	male-bias	0.12438	8.47665	5.90784e-10	0.000225731	0.0209058	1	X	84634582	POF1B	5'UTR-opensea
cg04625493	LUSC	male-bias	0.0624074	8.47567	5.92405e-10	0.00022635	-0.0229539	1	X	65241977	VSIG4	3'UTR-opensea
cg00295573	LUSC	male-bias	0.0932635	8.46959	6.02522e-10	0.000230216	0.00634486	1	X	149009554	MAGEA8	TSS1500-opensea
cg00235887	LUSC	male-bias	0.0968674	8.46152	6.16234e-10	0.000235455	0.00933956	1	X	9430465	TBL1X	TSS1500-shelf
cg13178332	LUSC	female-bias	-0.0254415	-8.43714	6.59624e-10	0.000252034	-0.00271295	1	X	41112819		IGR-island
cg04497165	LUSC	male-bias	0.179776	8.42887	6.75034e-10	0.000257922	0.0975415	1	X	103494417		IGR-shore
cg23026995	LUSC	male-bias	0.115232	8.42403	6.84233e-10	0.000261436	0.0804685	1	X	128872940	XPNPEP2	TSS200-opensea
cg08264124	LUSC	male-bias	0.0577022	8.35585	8.2802e-10	0.000316376	0.0471831	1	X	63006802	MIR1468	TSS1500-opensea
cg21193180	LUSC	male-bias	0.0561172	8.35383	8.32737e-10	0.000318178	0.046983	1	X	2800457	GYG2	3'UTR-opensea
cg16159925	LUSC	male-bias	0.0740094	8.33324	8.82211e-10	0.000337081	-0.0101662	1	X	139866657	CDR1	5'UTR-opensea
cg05929502	LUSC	male-bias	0.130481	8.32957	8.91339e-10	0.000340569	0.0941157	1	X	48395055		IGR-shelf
cg16401529	LUSC	female-bias	-0.0999963	-8.32504	9.02746e-10	0.000344927	-0.0875267	1	X	90689603	PABPC5	5'UTR-island
cg02611122	LUSC	female-bias	-0.131929	-8.31561	9.26958e-10	0.000354179	-0.025169	1	X	153247499	TMEM187	5'UTR-island
cg03699508	LUSC	male-bias	0.107181	8.2968	9.77236e-10	0.000373389	0.0165336	1	X	79280150	TBX22	Body-opensea
cg16199038	LUSC	female-bias	-0.131926	-8.29456	9.83388e-10	0.00037574	0.039391	1	X	138285469	FGF13	5'UTR-island
cg03274069	LUSC	male-bias	0.100805	8.28987	9.96449e-10	0.00038073	0.0199044	1	X	153171699	AVPR2	Body-opensea
cg00291222	LUSC	female-bias	-0.159207	-8.28433	1.01206e-09	0.000386694	-0.0635612	1	X	100910662	ARMCX2	3'UTR-opensea
cg17938879	LUSC	female-bias	-0.169612	-8.2713	1.04984e-09	0.000401129	-0.0313132	1	X	148156001		IGR-opensea
cg06281680	LUSC	female-bias	-0.073341	-8.26159	1.07892e-09	0.000412241	-0.0453509	1	2	232347922		IGR-shore
cg13369656	LUSC	male-bias	0.107267	8.24711	1.12378e-09	0.000429383	0.064224	1	X	151287089	MAGEA5	TSS1500-opensea
cg01355242	LUSC	female-bias	-0.141857	-8.24225	1.13925e-09	0.000435294	-0.0527928	1	X	56258387	KLF8	TSS1500-shore
cg01882566	LUSC	female-bias	-0.0952949	-8.24161	1.14131e-09	0.00043608	-0.0783536	1	X	38187196	RPGR	TSS1500-shore
cg14533133	LUSC	female-bias	-0.174993	-8.21066	1.24533e-09	0.000475825	-0.10447	1	X	144902897	SLITRK2	TSS200-shore
cg00379799	LUSC	male-bias	0.122272	8.20924	1.25033e-09	0.000477734	0.0958258	1	X	12154656		IGR-shore
cg19925887	LUSC	male-bias	0.136346	8.20663	1.25955e-09	0.000481257	0.0634661	1	X	151146909		IGR-shelf
cg09725213	LUSC	female-bias	-0.121797	-8.19317	1.3083e-09	0.000499883	-0.0926478	1	X	90689892	PABPC5	5'UTR-island
cg24974356	LUSC	male-bias	0.0866197	8.1613	1.4315e-09	0.000546957	0.0736468	1	X	103035890	PLP1	Body-opensea
cg20907109	LUSC	male-bias	0.0451535	8.15209	1.46923e-09	0.000561375	0.0253326	1	X	90690987	PABPC5	Body-shore
cg25569491	LUSC	male-bias	0.058963	8.14579	1.49562e-09	0.000571456	0.0248302	1	X	30264720	MAGEB1	5'UTR-shore
cg14833706	LUSC	male-bias	0.125426	8.12969	1.56531e-09	0.000598086	0.0661843	1	X	57617561	ZXDB	TSS1500-shore
cg01864032	LUSC	female-bias	-0.132292	-8.12956	1.56589e-09	0.000598308	-0.128753	1	X	69674332	DLG3	Body-shore
cg01990106	LUSC	male-bias	0.121218	8.07658	1.81941e-09	0.000695172	0.0117095	1	X	5809841	NLGN4X	3'UTR-shore
cg13716034	LUSC	male-bias	0.11542	8.07429	1.83124e-09	0.000699694	0.0403828	1	X	65238737	MIR223	Body-opensea
cg05872215	LUSC	female-bias	-0.0926114	-8.07136	1.84653e-09	0.000705535	-0.0373344	1	X	128913854	SASH3	TSS200-opensea
cg06268269	LUSC	male-bias	0.103982	8.06442	1.88324e-09	0.00071956	0.0699042	1	X	135059071		IGR-shelf
cg20509119	LUSC	female-bias	-0.145328	-8.04143	2.01026e-09	0.000768095	-0.0332031	1	X	39378476		IGR-opensea
cg14924469	LUSC	male-bias	0.181027	8.04085	2.01357e-09	0.000769361	0.0386866	1	X	130964846	LOC286467	TSS200-opensea
cg20460541	LUSC	female-bias	-0.159367	-8.02949	2.0796e-09	0.000794588	-0.151179	1	X	129253297		IGR-shore
cg03598919	LUSC	male-bias	0.0716518	8.02294	2.11865e-09	0.00080951	0.048266	1	X	51150887	CXorf67	1stExon-island
cg00261039	LUSC	female-bias	-0.0984039	-8.00096	2.25528e-09	0.000861715	-0.0659806	1	X	40006123	BCOR	5'UTR-island
cg00195237	LUSC	male-bias	0.12243	7.99794	2.27474e-09	0.000869149	0.102364	1	X	68722118		IGR-shore
cg24422680	LUSC	female-bias	-0.171443	-7.98934	2.33105e-09	0.000890665	-0.0388334	1	X	90690118	PABPC5	5'UTR-island
cg23992130	LUSC	male-bias	0.180373	7.97915	2.39965e-09	0.000916876	0.0917962	1	X	118113800	LONRF3	Body-shelf
cg25251019	LUSC	female-bias	-0.149277	-7.97533	2.42591e-09	0.000926908	-0.0100881	1	X	70797682	ACRC	TSS200-shore
cg08609845	LUSC	male-bias	0.0958543	7.95912	2.54057e-09	0.000970717	0.0657948	1	X	45060113	CXorf36	5'UTR-opensea
cg26959464	LUSC	male-bias	0.127459	7.95092	2.60058e-09	0.000993648	0.0359663	1	X	118288798		IGR-shelf
cg22031654	LUSC	male-bias	0.0389409	7.92722	2.78241e-09	0.00106312	0.0250542	1	X	31090309	FTHL17	TSS200-island
cg17678039	LUSC	female-bias	-0.15899	-7.89589	3.04275e-09	0.0011626	0.0557379	1	X	70838476	CXCR3	TSS200-opensea
cg25606376	LUSC	male-bias	0.0866213	7.88638	3.12649e-09	0.00119459	0.00693503	1	X	15877305		IGR-shelf
cg16564271	LUSC	male-bias	0.0693437	7.87963	3.18746e-09	0.00121789	0.063977	1	X	138769193	MCF2	5'UTR-opensea
cg21330641	LUSC	male-bias	0.0764981	7.87672	3.21408e-09	0.00122806	0.0326983	1	X	118780930	2024-09-06	Body-opensea
cg00467854	LUSC	female-bias	-0.110452	-7.87553	3.22501e-09	0.00123224	-0.0443539	1	X	25040358		IGR-shore
cg16062292	LUSC	male-bias	0.152234	7.87512	3.22876e-09	0.00123367	0.0394461	1	X	153558585	TKTL1	3'UTR-shelf
cg07001318	LUSC	male-bias	0.109607	7.828	3.6949e-09	0.00141177	0.0846527	1	X	45060034	CXorf36	1stExon-opensea
cg19538335	LUSC	male-bias	0.0820207	7.80417	3.95598e-09	0.00151153	0.0711915	1	X	52898126	XAGE3	TSS1500-opensea
cg19500599	LUSC	male-bias	0.0944692	7.79516	4.05952e-09	0.00155109	0.0588779	1	X	115594970	CXorf61	TSS1500-opensea
cg11390960	LUSC	female-bias	-0.138901	-7.7676	4.3936e-09	0.00167874	-0.0600749	1	X	43517029	MAOA	Body-shore
cg15228617	LUSC	male-bias	0.0704037	7.76711	4.39976e-09	0.00168109	0.0695618	1	X	151811649	GABRQ	Body-opensea
cg06137651	LUSC	female-bias	-0.121376	-7.76064	4.4823e-09	0.00171263	-0.00790223	1	X	46940664	RGN	Body-shelf
cg10494806	LUSC	male-bias	0.172887	7.72313	4.99246e-09	0.00190756	0.0283133	1	X	48980610	GPKOW	TSS1500-shore
cg06953627	LUSC	male-bias	0.0804768	7.72084	5.02539e-09	0.00192014	0.0505594	1	X	70711445	INGX	Body-shore
cg11244095	LUSC	male-bias	0.0585394	7.71866	5.05698e-09	0.00193221	0.0549703	1	X	135382675	GPR112	TSS1500-island
cg19250658	LUSC	male-bias	0.0646677	7.71415	5.12307e-09	0.00195746	0.0281975	1	X	128654456	SMARCA1	Body-shelf
cg17403974	LUSC	male-bias	0.153949	7.69048	5.48413e-09	0.00209541	0.0952121	1	X	115304403	AGTR2	Body-opensea
cg08814772	LUSC	female-bias	-0.0987939	-7.68761	5.5297e-09	0.00211283	-0.0540696	1	X	153046246	SRPK3	TSS1500-shore
cg03534718	LUSC	male-bias	0.0575704	7.67742	5.69449e-09	0.00217579	0.0356099	1	X	152736932	HAUS7	TSS1500-shore
cg19002828	LUSC	female-bias	-0.129823	-7.64502	6.2518e-09	0.00238873	-0.00544537	1	X	78623745	ITM2A	TSS1500-opensea
cg20521035	LUSC	male-bias	0.103277	7.64381	6.27381e-09	0.00239714	0.0734539	1	X	10645846	MID1	TSS200-opensea
cg02830187	LUSC	female-bias	-0.111207	-7.64362	6.27724e-09	0.00239845	0.0815658	1	X	152906667	DUSP9	TSS1500-shore
cg20348344	LUSC	male-bias	0.137537	7.62949	6.53833e-09	0.00249821	0.12742	1	X	39951468	BCOR	5'UTR-island
cg01132485	LUSC	male-bias	0.0921979	7.61776	6.76361e-09	0.00258429	0.0814252	1	X	139040942	CXorf66	Body-opensea
cg21836062	LUSC	female-bias	-0.164607	-7.61434	6.83075e-09	0.00260994	-0.0675277	1	X	33357661	DMD	1stExon-opensea
cg23183988	LUSC	female-bias	-0.112444	-7.60126	7.09371e-09	0.00271042	-0.013582	1	X	19908877		IGR-shelf
cg17189778	LUSC	female-bias	-0.124663	-7.59442	7.23525e-09	0.0027645	-0.0191759	1	X	153169823	AVPR2	TSS1500-opensea
cg03682444	LUSC	male-bias	0.0395567	7.5894	7.34105e-09	0.00280492	0.0222532	1	X	153134108	L1CAM	Body-opensea
cg01742164	LUSC	male-bias	0.0970482	7.56919	7.78277e-09	0.00297369	0.0732254	1	X	149935904	CD99L2	3'UTR-opensea
cg03761923	LUSC	male-bias	0.137952	7.5415	8.43212e-09	0.00322181	0.0901477	1	X	153946773	GAB3	Body-opensea
cg07005924	LUSC	male-bias	0.129328	7.53283	8.64652e-09	0.00330372	0.0557077	1	X	37001209		IGR-shelf
cg17825231	LUSC	male-bias	0.0654623	7.529	8.743e-09	0.00334058	0.0169011	1	X	34960973	FAM47B	1stExon-shore
cg02690554	LUSC	female-bias	-0.1027	-7.51325	9.15109e-09	0.00349651	0.0681774	1	X	71527606	CITED1	TSS1500-shore
cg15364850	LUSC	male-bias	0.100949	7.51076	9.21733e-09	0.00352182	-0.00819835	1	X	130210534	FLJ30058	5'UTR-shelf
cg13788827	LUSC	female-bias	-0.0792687	-7.48402	9.96059e-09	0.00380581	-0.0173643	1	X	12990209		IGR-shelf
cg25499905	LUSC	male-bias	0.0798133	7.44919	1.10208e-08	0.00421089	-0.0134982	1	X	129093272		IGR-shore
cg17010905	LUSC	male-bias	0.0869899	7.43005	1.16511e-08	0.00445172	0.0333311	1	X	153365806		IGR-shelf
cg05100479	LUSC	female-bias	-0.053272	-7.42689	1.17586e-08	0.00449281	0.0232455	1	X	113819290	HTR2C	5'UTR-island
cg02600772	LUSC	male-bias	0.0974675	7.42254	1.19081e-08	0.00454992	0.080431	1	X	80259473		IGR-island
cg22762309	LUSC	male-bias	0.0697065	7.41326	1.22339e-08	0.00467443	-0.0012976	1	X	69282103	OTUD6A	TSS1500-shore
cg01996723	LUSC	female-bias	-0.0976518	-7.40735	1.24461e-08	0.0047555	-0.00346918	1	X	139592127		IGR-shore
cg12491455	LUSC	female-bias	-0.123266	-7.39568	1.28761e-08	0.00491981	-0.0896171	1	X	11128728	HCCS	TSS1500-shore
cg27124447	LUSC	female-bias	-0.114059	-7.39121	1.30445e-08	0.00498415	-0.0762012	1	X	16884789	RBBP7	Body-shelf
cg11696431	LUSC	male-bias	0.11119	7.39003	1.30894e-08	0.00500128	0.0864588	1	X	144902062	SLITRK2	TSS1500-shore
cg00724728	LUSC	female-bias	-0.112441	-7.38076	1.34476e-08	0.00513814	0.00791988	1	X	67867238	STARD8	TSS1500-opensea
cg05181110	LUSC	female-bias	-0.028082	-7.37744	1.35784e-08	0.00518813	-0.00709614	1	X	40944360	USP9X	TSS1500-island
cg14454549	LUSC	female-bias	-0.0222864	-7.37401	1.37144e-08	0.00524011	-0.0103606	1	X	41135632		IGR-island
cg14688179	LUSC	female-bias	-0.138015	-7.37226	1.37846e-08	0.00526692	-0.0800246	1	X	153770983	G6PD	Body-shelf
cg00400665	LUSC	male-bias	0.105477	7.36698	1.39982e-08	0.00534853	0.0823987	1	X	68369933		IGR-island
cg21761699	LUSC	male-bias	0.134084	7.36588	1.40432e-08	0.00536571	0.0188952	1	X	41108958		IGR-shelf
cg18407141	LUSC	female-bias	-0.109827	-7.35728	1.43998e-08	0.00550197	-0.074941	1	X	150864804		IGR-shore
cg03028216	LUSC	female-bias	-0.106865	-7.33733	1.52619e-08	0.00583139	-0.0270224	1	X	20431329		IGR-opensea
cg00911398	LUSC	male-bias	0.0836963	7.31966	1.60692e-08	0.00613982	-0.00766278	1	X	2984598	ARSF	TSS1500-opensea
cg23688843	LUSC	male-bias	0.0984117	7.31612	1.62361e-08	0.00620359	0.0530371	1	X	50026733	CCNB3	TSS1500-shelf
cg06015784	LUSC	male-bias	0.0771046	7.3068	1.66839e-08	0.00637472	0.0362018	1	X	3632580	PRKX	TSS1500-shore
cg06000876	LUSC	male-bias	0.0563529	7.28897	1.75759e-08	0.00671552	0.0229628	1	X	153219435	HCFC1	Body-shore
cg10530733	LUSC	female-bias	-0.120647	-7.28192	1.79414e-08	0.00685517	-0.117514	1	X	53078631	GPR173	1stExon-opensea
cg18700197	LUSC	male-bias	0.0755635	7.26504	1.88486e-08	0.00720181	0.0578494	1	X	64723481	ZC3H12B	3'UTR-opensea
cg05052243	LUSC	male-bias	0.103739	7.25531	1.93927e-08	0.0074097	0.0732435	1	X	134975547	SAGE1	TSS1500-opensea
cg00321056	LUSC	male-bias	0.0903281	7.2483	1.97943e-08	0.00756315	0.0890234	1	X	53311582	IQSEC2	Body-opensea
cg04515986	LUSC	male-bias	0.11229	7.22347	2.12867e-08	0.00813336	0.082805	1	X	31089692	FTHL17	1stExon-shore
cg12451679	LUSC	male-bias	0.0320941	7.22261	2.13401e-08	0.00815379	0.0262084	1	19	47617189	ZC3H4	TSS200-shore
cg17876277	LUSC	female-bias	-0.0738516	-7.21395	2.18882e-08	0.00836318	-0.0536235	1	X	16854696	CXorf15	Body-opensea
cg06794323	LUSC	female-bias	-0.145741	-7.19788	2.29431e-08	0.00876625	-0.0152225	1	X	43518105	MAOA	Body-shelf
cg04391849	LUSC	male-bias	0.0812773	7.19345	2.32431e-08	0.0088809	0.0699579	1	X	69282642	OTUD6A	1stExon-island
cg24156832	LUSC	male-bias	0.101261	7.18204	2.40332e-08	0.00918277	0.0394675	1	X	152779629		IGR-shelf
cg09761247	LUSC	male-bias	0.134753	7.16293	2.54182e-08	0.00971198	-0.0555877	1	X	148585951	IDS	Body-shore
cg26003280	LUSC	male-bias	0.0422293	7.14775	2.65759e-08	0.0101543	0.0417593	1	X	66762467	AR	TSS1500-shore
cg09226411	LUSC	male-bias	0.112004	7.10408	3.02124e-08	0.0115438	0.045491	1	X	135730241	CD40LG	TSS200-opensea
cg06539694	LUSC	female-bias	-0.0852927	-7.10277	3.03293e-08	0.0115884	-0.0194981	1	X	68348545		IGR-island
cg14107638	LUSC	male-bias	0.0598184	7.102	3.03984e-08	0.0116148	0.00321002	1	X	151286380	MAGEA5	5'UTR-opensea
cg20086286	LUSC	female-bias	-0.156554	-7.10157	3.04368e-08	0.0116295	-0.0247431	1	X	133307853		IGR-shore
cg16552959	LUSC	male-bias	0.0703005	7.09876	3.06886e-08	0.0117257	0.0395971	1	X	149528296		IGR-shore
cg06438727	LUSC	male-bias	0.0616772	7.08797	3.16783e-08	0.0121039	0.00619107	1	X	114430258	LRCH2	Body-shelf
cg25887010	LUSC	female-bias	-0.0866347	-7.05815	3.45825e-08	0.0132135	-0.0195131	1	X	53029709		IGR-island
cg26672162	LUSC	female-bias	-0.189009	-7.04696	3.57403e-08	0.0136559	-0.0701957	1	X	47490133	CFP	TSS1500-opensea
cg22805594	LUSC	male-bias	0.0452376	7.04609	3.58322e-08	0.013691	0.000628952	1	X	47082293	CDK16	Body-shelf
cg08341987	LUSC	male-bias	0.0301303	7.04497	3.59499e-08	0.013736	0.00458441	1	X	47053154	UBA1	TSS200-island
cg15844471	LUSC	female-bias	-0.0709071	-7.04384	3.60703e-08	0.013782	-0.0509141	1	X	133371988	CCDC160	5'UTR-shore
cg14804093	LUSC	female-bias	-0.128549	-7.02483	3.81475e-08	0.0145757	-0.018253	1	X	13128736		IGR-opensea
cg26215003	LUSC	female-bias	-0.106332	-7.02447	3.81879e-08	0.0145911	-0.0360077	1	X	20431166		IGR-opensea
cg25153755	LUSC	female-bias	-0.13489	-7.0206	3.86254e-08	0.0147583	-0.0771882	1	X	47433716	SYN1	Body-island
cg24735671	LUSC	female-bias	-0.0819448	-7.01952	3.87482e-08	0.0148052	-0.0491845	1	X	12883760	TLR7	TSS1500-opensea
cg06891491	LUSC	female-bias	-0.172822	-7.01516	3.92491e-08	0.0149966	0.0163421	1	X	134429749	ZNF75D	5'UTR-island
cg21184454	LUSC	female-bias	-0.115447	-7.01085	3.97515e-08	0.0151885	-0.0158949	1	X	19765879	SH3KBP1	Body-opensea
cg05539388	LUSC	male-bias	0.0374864	7.00834	4.00467e-08	0.0153013	0.0352517	1	X	130676918	OR13H1	TSS1500-opensea
cg13613450	LUSC	female-bias	-0.107764	-7.00527	4.041e-08	0.0154401	-0.0166388	1	X	136657310		IGR-shore
cg00608151	LUSC	female-bias	-0.11184	-6.99606	4.15221e-08	0.015865	-0.0576268	1	X	90689946	PABPC5	5'UTR-island
cg19688503	LUSC	male-bias	0.116575	6.9868	4.26721e-08	0.0163045	0.0107315	1	X	110513941	CAPN6	TSS200-opensea
cg09515442	LUSC	female-bias	-0.167616	-6.98537	4.28529e-08	0.0163735	-0.0118	1	X	48689942	PCSK1N	Body-island
cg13640071	LUSC	female-bias	-0.150636	-6.97191	4.4588e-08	0.0170365	0.045798	1	X	102585147	TCEAL7	TSS200-opensea
cg13770495	LUSC	male-bias	0.0777154	6.96247	4.58482e-08	0.017518	0.0667437	1	X	37404519		IGR-island
cg00735876	LUSC	male-bias	0.0895968	6.95745	4.6532e-08	0.0177793	0.0339519	1	X	135334923	MAP7D3	TSS1500-shore
cg20851325	LUSC	female-bias	-0.122044	-6.94218	4.86784e-08	0.0185994	-0.0444616	1	X	153169432	AVPR2	TSS1500-opensea
cg22549041	LUSC	female-bias	-0.0729448	-6.91713	5.24175e-08	0.0200281	-0.0619661	1	15	75019251	CYP1A1	TSS1500-island
cg22952287	LUSC	male-bias	0.11646	6.91198	5.32213e-08	0.0203352	0.0828859	1	X	103268599	H2BFWT	TSS1500-shore
cg06476341	LUSC	female-bias	-0.107466	-6.91136	5.33182e-08	0.0203722	0.0228425	1	X	144903005	SLITRK2	TSS200-island
cg09368035	LUSC	male-bias	0.106374	6.90602	5.4167e-08	0.0206965	0.0676848	1	X	39943369	BCOR	5'UTR-island
cg10013491	LUSC	male-bias	0.0453137	6.88152	5.82363e-08	0.0222513	0.0442469	1	X	102190164		IGR-shelf
cg14239049	LUSC	female-bias	-0.0663878	-6.87555	5.92745e-08	0.022648	-0.0386656	1	X	138529210	SRD5A1P1	Body-island
cg24462702	LUSC	female-bias	-0.0495774	-6.87257	5.97989e-08	0.0228484	0.00610875	1	X	135730445	CD40LG	1stExon-opensea
cg10162698	LUSC	female-bias	-0.0914957	-6.83562	6.67128e-08	0.0254901	-0.00264533	1	X	55245347	PAGE5	TSS1500-opensea
cg00404599	LUSC	female-bias	-0.170362	-6.82938	6.79573e-08	0.0259656	-0.145696	1	X	107018431	TSC22D3	1stExon-shore
cg00625743	LUSC	male-bias	0.089828	6.82879	6.80768e-08	0.0260113	0.0817946	1	X	132353139	TFDP3	TSS1500-opensea
cg08076987	LUSC	female-bias	-0.0800022	-6.82578	6.86852e-08	0.0262437	-0.0214966	1	X	139844511		IGR-shelf
cg09331780	LUSC	male-bias	0.217247	6.81702	7.04929e-08	0.0269344	0.0755123	1	X	84364419	SATL1	TSS1500-opensea
cg19419474	LUSC	male-bias	0.0670716	6.79636	7.49446e-08	0.0286354	-0.0226658	1	X	37544704	XK	TSS1500-shore
cg00194585	LUSC	male-bias	0.0686178	6.79031	7.63009e-08	0.0291536	0.0603815	1	X	131154158		IGR-shelf
cg09307237	LUSC	male-bias	0.0876945	6.78913	7.65673e-08	0.0292554	0.0439382	1	X	71549845	HDAC8	3'UTR-opensea
cg12528673	LUSC	female-bias	-0.0685122	-6.77152	8.06735e-08	0.0308243	-0.0580356	1	X	150891593	FATE1	3'UTR-opensea
cg15241084	LUSC	female-bias	-0.167839	-6.76867	8.13606e-08	0.0310868	-0.0540133	1	X	12886121	TLR7	Body-opensea
cg21648502	LUSC	female-bias	-0.0958716	-6.7612	8.31835e-08	0.0317833	0.0829686	1	X	47489285	CFP	1stExon-opensea
cg07004932	LUSC	male-bias	0.121347	6.76076	8.32929e-08	0.0318251	0.108328	1	X	70521489	ITGB1BP2	TSS200-opensea
cg17482649	LUSC	female-bias	-0.146552	-6.74619	8.69726e-08	0.0332311	-0.105477	1	X	53117672	TSPYL2	3'UTR-island
cg03791917	LUSC	female-bias	-0.0691493	-6.74426	8.74721e-08	0.033422	0.0562072	1	X	100641287	BTK	TSS200-opensea
cg19687650	LUSC	female-bias	-0.130403	-6.7346	9.00186e-08	0.0343949	-0.0309579	1	X	71289025	NHSL2	Body-opensea
cg12845419	LUSC	male-bias	0.131311	6.72874	9.15998e-08	0.0349991	0.0672758	1	X	135573249	BRS3	Body-opensea
cg10982861	LUSC	male-bias	0.117	6.72267	9.32665e-08	0.0356359	0.0377407	1	X	107018095	TSC22D3	Body-shore
cg17812797	LUSC	female-bias	-0.0195204	-6.70856	9.72586e-08	0.0371613	-0.00743849	1	X	47053801	UBA1	5'UTR-shore
cg10709771	LUSC	female-bias	-0.0878245	-6.6897	1.02869e-07	0.0393049	0.00865688	1	X	25027268	ARX	Body-shore
cg18091964	LUSC	female-bias	-0.0984758	-6.68401	1.04623e-07	0.0399753	0.0210717	1	X	128913980	SASH3	1stExon-opensea
cg08384999	LUSC	male-bias	0.104671	6.67686	1.06871e-07	0.0408341	0.0264651	1	X	40004346	BCOR	5'UTR-island
cg16620229	LUSC	female-bias	-0.1169	-6.65259	1.14874e-07	0.043892	0.0151376	1	X	129307331	RAB33A	Body-shore
cg23245720	LUSC	female-bias	-0.123733	-6.64136	1.1878e-07	0.0453842	0.00146479	1	X	133680549	MGC16121	Body-island
cg10786329	LUSC	female-bias	-0.10341	-6.63856	1.19775e-07	0.0457645	-0.0476852	1	X	119125722		IGR-shore
cg17119559	LUSC	male-bias	0.068542	6.61506	1.28457e-07	0.0490818	0.0383509	1	X	19100990	GPR64	5'UTR-opensea
cg06443888	COAD	female-bias	-0.444029	-45.0105	4.77974e-31	1.81072e-25	-0.0897256	1	X	107980132	IRS4	TSS1500-island
cg27118658	COAD	female-bias	-0.414385	-40.1855	1.84229e-29	6.97921e-24	-0.0596394	1	X	152676995		IGR-island
cg20878850	COAD	female-bias	-0.338904	-37.1244	2.34184e-28	8.87168e-23	-0.0885079	1	X	66763685	AR	TSS200-island
cg03576039	COAD	female-bias	-0.409508	-37.0131	2.57822e-28	9.76715e-23	-0.0654856	1	X	133306349		IGR-island
cg19754833	COAD	female-bias	-0.327543	-35.2588	1.21902e-27	4.61805e-22	-0.0479527	1	X	110039080	CHRDL1	5'UTR-island
cg23779047	COAD	female-bias	-0.360023	-35.1848	1.30357e-27	4.93834e-22	-0.109313	1	X	47225852		IGR-opensea
cg00583858	COAD	male-bias	0.282135	33.6293	5.51911e-27	2.09082e-21	0.0687125	1	X	135632947	VGLL1	Body-opensea
cg13501371	COAD	female-bias	-0.181206	-33.2569	7.87039e-27	2.98156e-21	0.00175581	1	X	110039194	CHRDL1	5'UTR-island
cg12589433	COAD	female-bias	-0.321691	-33.1964	8.34009e-27	3.1595e-21	-0.0155717	1	X	66765978	AR	1stExon-shore
cg25125652	COAD	female-bias	-0.382629	-32.9272	1.08091e-26	4.09485e-21	-0.0371415	1	X	110039604	CHRDL1	TSS1500-shore
cg06232846	COAD	male-bias	0.240881	32.4798	1.67074e-26	6.32931e-21	-0.0675158	1	X	70389504	NLGN3	Body-shore
cg20134598	COAD	female-bias	-0.232891	-31.7837	3.32715e-26	1.26043e-20	-0.0852614	1	X	54947308	TRO	5'UTR-opensea
cg26506212	COAD	female-bias	-0.356676	-31.7477	3.44905e-26	1.30661e-20	0.00626911	1	X	100740275	ARMCX4	Body-island
cg10510586	COAD	female-bias	-0.298382	-30.5559	1.16141e-25	4.3998e-20	-0.0915385	1	X	68348597		IGR-island
cg12358915	COAD	female-bias	-0.403747	-30.2236	1.64239e-25	6.2219e-20	-0.0396205	1	X	139521621		IGR-island
cg00625841	COAD	female-bias	-0.34007	-30.0834	1.90283e-25	7.20856e-20	-0.0159843	1	X	134156624	FAM127C	TSS200-shore
cg09895223	COAD	female-bias	-0.245694	-29.3685	4.07246e-25	1.54278e-19	0.00623224	1	X	110039197	CHRDL1	5'UTR-island
cg18161489	COAD	female-bias	-0.321281	-29.1614	5.09257e-25	1.92923e-19	-0.0651642	1	X	107980144	IRS4	TSS1500-island
cg23476456	COAD	female-bias	-0.186517	-28.7831	7.69152e-25	2.9138e-19	0.0230346	1	X	110039192	CHRDL1	5'UTR-island
cg17917970	COAD	female-bias	-0.322996	-28.0442	1.7464e-24	6.61594e-19	-0.0410877	1	X	152908205	DUSP9	5'UTR-island
cg25640635	COAD	female-bias	-0.238689	-27.8916	2.0738e-24	7.85625e-19	0.00936076	1	X	100740535	ARMCX4	Body-island
cg09813276	COAD	female-bias	-0.386324	-27.2691	4.21882e-24	1.59823e-18	0.00970409	1	X	100805521	ARMCX1	1stExon-shelf
cg21911834	COAD	female-bias	-0.315454	-27.0094	5.69839e-24	2.15874e-18	-0.0717564	1	X	103498812	ESX1	Body-island
cg26955881	COAD	female-bias	-0.331218	-26.3533	1.23256e-23	4.66934e-18	-0.0787842	1	X	21393407	CNKSR2	Body-island
cg12485020	COAD	female-bias	-0.263953	-26.2859	1.33549e-23	5.05929e-18	0.0166934	1	X	110039269	CHRDL1	5'UTR-island
cg08812937	COAD	male-bias	0.231593	26.0922	1.68356e-23	6.37787e-18	-0.0845187	1	X	152159208	PNMA5	Body-shelf
cg18731813	COAD	female-bias	-0.416574	-25.8733	2.19157e-23	8.30239e-18	-0.086482	1	X	100805683	ARMCX1	5'UTR-shelf
cg06384623	COAD	female-bias	-0.318725	-25.7819	2.44826e-23	9.27482e-18	-0.0290375	1	X	133119308	GPC3	1stExon-island
cg23116589	COAD	female-bias	-0.375781	-25.1918	5.04723e-23	1.91206e-17	-0.02376	1	X	100805503	ARMCX1	TSS200-shelf
cg22846914	COAD	female-bias	-0.265498	-24.9409	6.89653e-23	2.61263e-17	-0.000201628	1	X	25041258		IGR-island
cg07681139	COAD	female-bias	-0.238928	-24.7112	9.20171e-23	3.48591e-17	-0.0271572	1	X	103811716	IL1RAPL2	5'UTR-island
cg25903474	COAD	female-bias	-0.410975	-24.3444	1.46581e-22	5.55298e-17	0.0046958	1	X	110039472	CHRDL1	TSS200-shore
cg00426668	COAD	male-bias	0.298259	24.0293	2.19762e-22	8.32532e-17	0.0534913	1	X	110514231	CAPN6	TSS1500-opensea
cg26839325	COAD	male-bias	0.280144	23.5386	4.16833e-22	1.5791e-16	0.0673821	1	X	50653828	BMP15	1stExon-opensea
cg09031836	COAD	female-bias	-0.325084	-23.538	4.17201e-22	1.58049e-16	-0.0902234	1	X	139583634		IGR-shelf
cg24754154	COAD	female-bias	-0.246532	-23.435	4.77899e-22	1.81044e-16	-0.111052	1	X	107979584	IRS4	5'UTR-island
cg17740587	COAD	female-bias	-0.22752	-23.2746	5.91136e-22	2.23942e-16	-0.11888	1	X	136651375	ZIC3	Body-island
cg16917996	COAD	female-bias	-0.278227	-22.9925	8.62087e-22	3.26587e-16	-0.110517	1	X	105066516	NRK	TSS200-island
cg04544498	COAD	female-bias	-0.367257	-22.8644	1.02455e-21	3.88133e-16	-0.0992368	1	X	75647859	MAGEE1	TSS1500-shore
cg00238052	COAD	female-bias	-0.27251	-22.4038	1.92004e-21	7.27373e-16	-0.0150864	1	X	101380291	TCEAL2	TSS1500-opensea
cg11331191	COAD	male-bias	0.184588	22.3	2.21535e-21	8.39249e-16	0.03285	1	X	63446644	ASB12	TSS1500-opensea
cg21162029	COAD	female-bias	-0.291806	-22.2782	2.28307e-21	8.64901e-16	-0.116277	1	X	133306253		IGR-island
cg08416046	COAD	female-bias	-0.283578	-22.252	2.36739e-21	8.96846e-16	-0.0259608	1	X	107979569	IRS4	1stExon-island
cg24275475	COAD	female-bias	-0.28718	-22.2045	2.5282e-21	9.57764e-16	-0.0776812	1	X	107681397	COL4A6	Body-opensea
cg13219667	COAD	female-bias	-0.270222	-22.1419	2.75799e-21	1.04482e-15	-0.00775869	1	X	153671953	FAM50A	TSS1500-shore
cg15861835	COAD	male-bias	0.251208	22.0145	3.29386e-21	1.24782e-15	-0.0321413	1	X	76649101		IGR-opensea
cg18834878	COAD	female-bias	-0.271481	-22.003	3.34709e-21	1.26799e-15	-0.0777593	1	X	105067311	NRK	Body-shore
cg08791322	COAD	male-bias	0.188997	21.9503	3.60321e-21	1.36501e-15	0.0982572	1	X	69397117	DGAT2L6	TSS1500-opensea
cg13794642	COAD	male-bias	0.143395	21.936	3.67615e-21	1.39265e-15	0.129217	1	X	47229789	ZNF157	TSS1500-opensea
cg12614912	COAD	female-bias	-0.287158	-21.8585	4.09849e-21	1.55264e-15	-0.0958803	1	X	99664089	PCDH19	1stExon-island
cg11649713	COAD	male-bias	0.161611	21.8266	4.28643e-21	1.62384e-15	-0.0693047	1	X	109683484	AMMECR1	TSS200-opensea
cg19723705	COAD	male-bias	0.243362	21.706	5.08211e-21	1.92527e-15	0.144158	1	X	66799850	AR	Body-opensea
cg16584431	COAD	female-bias	-0.19444	-21.6495	5.5054e-21	2.08563e-15	0.0114835	1	X	117250153	KLHL13	5'UTR-shore
cg23859208	COAD	male-bias	0.175598	21.6217	5.72671e-21	2.16947e-15	0.0883861	1	X	129297005	AIFM1	Body-shelf
cg19045344	COAD	male-bias	0.200771	21.4556	7.25494e-21	2.74841e-15	0.116494	1	X	84364350	SATL1	TSS1500-opensea
cg01530162	COAD	female-bias	-0.328789	-21.4447	7.36881e-21	2.79155e-15	-0.0531566	1	X	139589424		IGR-shore
cg22844669	COAD	female-bias	-0.304417	-21.4361	7.46002e-21	2.8261e-15	0.0221873	1	X	136510760		IGR-island
cg21729122	COAD	female-bias	-0.279329	-21.3598	8.32133e-21	3.15239e-15	-0.0627822	1	X	25034488	ARX	TSS1500-island
cg24432916	COAD	female-bias	-0.306825	-21.2324	9.99543e-21	3.7866e-15	-0.0602787	1	X	139587479	SOX3	TSS1500-island
cg01857704	COAD	male-bias	0.244911	20.7795	1.93226e-20	7.32004e-15	0.102129	1	X	102965678	TMEM31	TSS200-opensea
cg00206332	COAD	male-bias	0.244884	20.7559	2.00054e-20	7.57872e-15	0.111031	1	X	151140984	GABRE	Body-shore
cg05418779	COAD	male-bias	0.2048	20.7282	2.08369e-20	7.89371e-15	-0.0233519	1	X	138771271	MCF2	5'UTR-shelf
cg12882438	COAD	female-bias	-0.19156	-20.4963	2.93647e-20	1.11243e-14	-0.0300088	1	X	152782950		IGR-island
cg02022247	COAD	female-bias	-0.261709	-20.4934	2.94918e-20	1.11725e-14	-0.0826335	1	X	25029872	ARX	Body-shore
cg22818965	COAD	female-bias	-0.161526	-20.4689	3.0584e-20	1.15862e-14	-0.0337458	1	X	103499842	ESX1	TSS1500-island
cg00412368	COAD	female-bias	-0.311918	-20.4285	3.24841e-20	1.2306e-14	-0.0184182	1	X	138285393	FGF13	5'UTR-island
cg25085925	COAD	female-bias	-0.26465	-20.4171	3.30409e-20	1.2517e-14	-0.083935	1	X	66763691	AR	TSS200-island
cg17560693	COAD	male-bias	0.19898	20.2987	3.94394e-20	1.49409e-14	0.0693918	1	X	79269739	TBX22	TSS1500-opensea
cg26793903	COAD	female-bias	-0.217703	-20.1948	4.61014e-20	1.74647e-14	-0.0140107	1	X	136629762		IGR-island
cg01382771	COAD	male-bias	0.216146	19.9948	6.23846e-20	2.36333e-14	0.0327277	1	X	102983822	GLRA4	TSS1500-opensea
cg27551771	COAD	male-bias	0.159371	19.9158	7.0344e-20	2.66486e-14	0.0694964	1	X	118213543	KIAA1210	3'UTR-opensea
cg04308274	COAD	female-bias	-0.266593	-19.8393	7.90592e-20	2.99502e-14	-0.134998	1	X	130207287	FLJ30058	5'UTR-island
cg24822127	COAD	male-bias	0.188516	19.8219	8.11927e-20	3.07585e-14	-0.0549629	1	X	150884331	FATE1	TSS200-opensea
cg20699879	COAD	female-bias	-0.252453	-19.8122	8.24003e-20	3.1216e-14	-0.0709614	1	X	103498900	ESX1	Body-island
cg26617508	COAD	female-bias	-0.284278	-19.6917	9.91434e-20	3.75588e-14	-0.0768376	1	X	68835489	EDA	TSS1500-shore
cg05559881	COAD	female-bias	-0.240565	-19.6529	1.05235e-19	3.98664e-14	-0.11469	1	X	136651644	ZIC3	Body-island
cg06002470	COAD	female-bias	-0.246546	-19.5048	1.32315e-19	5.01253e-14	-0.0848597	1	X	124339860		IGR-island
cg12268565	COAD	female-bias	-0.398975	-19.4759	1.38383e-19	5.24239e-14	-0.0787937	1	X	133685325		IGR-island
cg11024449	COAD	female-bias	-0.254442	-19.4165	1.5177e-19	5.74955e-14	0.00454884	1	X	70150787	SLC7A3	5'UTR-island
cg20220865	COAD	male-bias	0.183137	19.2092	2.09872e-19	7.95065e-14	0.0352928	1	X	69454387	AWAT1	TSS200-opensea
cg23384620	COAD	female-bias	-0.231304	-19.1502	2.30298e-19	8.72446e-14	-0.158153	1	X	103810458	IL1RAPL2	TSS1500-shore
cg06300107	COAD	male-bias	0.176421	19.0379	2.74967e-19	1.04167e-13	0.0729546	1	X	63616425	MTMR8	TSS1500-shore
cg14930000	COAD	male-bias	0.198348	18.7949	4.0482e-19	1.53359e-13	0.0362242	1	X	53028582		IGR-shore
cg05587158	COAD	male-bias	0.136771	18.7821	4.1317e-19	1.56522e-13	0.0657346	1	X	69487748	ARR3	TSS1500-opensea
cg07051329	COAD	female-bias	-0.276818	-18.7641	4.25279e-19	1.6111e-13	-0.0252346	1	X	110039369	CHRDL1	TSS200-island
cg23499980	COAD	female-bias	-0.313708	-18.7104	4.63484e-19	1.75583e-13	-0.0810397	1	X	122319148	GRIA3	Body-island
cg20967299	COAD	male-bias	0.187046	18.6765	4.89457e-19	1.85422e-13	0.0334714	1	X	68833308		IGR-shelf
cg07570652	COAD	female-bias	-0.158151	-18.6009	5.52841e-19	2.09434e-13	-0.0245562	1	X	130216807	FLJ30058	Body-island
cg03851490	COAD	female-bias	-0.131506	-18.5276	6.22433e-19	2.35798e-13	-0.121017	1	X	35937794	CXorf22	TSS200-opensea
cg03121419	COAD	male-bias	0.21625	18.4556	6.99524e-19	2.65003e-13	-0.0235269	1	X	125687720	DCAF12L1	TSS1500-shore
cg25569491	COAD	male-bias	0.116282	18.4367	7.21346e-19	2.7327e-13	0.0144218	1	X	30264720	MAGEB1	5'UTR-shore
cg22696549	COAD	female-bias	-0.310857	-18.4329	7.25816e-19	2.74963e-13	-0.0643485	1	X	30327667	NR0B1	TSS200-island
cg08437035	COAD	male-bias	0.219162	18.3383	8.46834e-19	3.20808e-13	0.0632848	1	X	103078413	RAB9B	3'UTR-opensea
cg16199038	COAD	female-bias	-0.231973	-18.3034	8.96511e-19	3.39628e-13	-0.0352937	1	X	138285469	FGF13	5'UTR-island
cg09810818	COAD	male-bias	0.151712	18.3002	9.01172e-19	3.41394e-13	-0.0472465	1	X	109683490	AMMECR1	TSS200-opensea
cg06879828	COAD	female-bias	-0.191568	-18.2842	9.25103e-19	3.5046e-13	0.101561	1	X	100333798	TMEM35	TSS200-opensea
cg27394478	COAD	male-bias	0.164348	18.1762	1.10445e-18	4.18403e-13	0.0244026	1	X	152683703	ZFP92	TSS200-shelf
cg19937286	COAD	male-bias	0.146283	18.1386	1.17503e-18	4.45139e-13	0.0536511	1	X	40017092	BCOR	5'UTR-shore
cg10474871	COAD	male-bias	0.197042	18.0626	1.33214e-18	5.04659e-13	0.104695	1	X	103815487	IL1RAPL2	5'UTR-shelf
cg18617708	COAD	male-bias	0.200537	18.0412	1.38004e-18	5.22804e-13	0.0276469	1	X	105280566	SERPINA7	1stExon-opensea
cg05371395	COAD	female-bias	-0.180018	-17.9802	1.52675e-18	5.78382e-13	0.108807	1	X	12156894	FRMPD4	5'UTR-island
cg16135771	COAD	male-bias	0.183947	17.9577	1.58512e-18	6.00495e-13	0.0323773	1	X	103030149	PLP1	TSS1500-opensea
cg11864566	COAD	female-bias	-0.189304	-17.8923	1.76709e-18	6.69431e-13	-0.0897922	1	X	99667214		IGR-island
cg27307168	COAD	male-bias	0.162748	17.8917	1.76885e-18	6.70101e-13	0.0828118	1	X	135966590		IGR-shelf
cg18337321	COAD	female-bias	-0.400268	-17.8801	1.80357e-18	6.83252e-13	-0.0575798	1	X	144899069	SLITRK2	TSS1500-shore
cg07774424	COAD	female-bias	-0.274154	-17.8699	1.83444e-18	6.94945e-13	-0.0702258	1	X	101915091		IGR-opensea
cg04929022	COAD	male-bias	0.176506	17.8423	1.92082e-18	7.2767e-13	0.108478	1	X	135617792	VGLL1	5'UTR-opensea
cg13225177	COAD	female-bias	-0.227588	-17.7553	2.22219e-18	8.41841e-13	-0.0447324	1	X	136509076		IGR-shore
cg07381872	COAD	male-bias	0.132848	17.7494	2.24405e-18	8.5012e-13	0.0521956	1	1	61408076		IGR-opensea
cg01598357	COAD	female-bias	-0.173989	-17.7122	2.38889e-18	9.04989e-13	-0.0503437	1	X	69664317	DLG3	TSS1500-shore
cg07810164	COAD	female-bias	-0.165147	-17.7113	2.39247e-18	9.06348e-13	-0.0771343	1	X	13588174	EGFL6	Body-island
cg18496230	COAD	male-bias	0.163581	17.6461	2.66997e-18	1.01147e-12	0.0659583	1	X	102562302		IGR-shelf
cg03950785	COAD	female-bias	-0.246677	-17.5227	3.28921e-18	1.24606e-12	-0.0157352	1	X	136630705		IGR-shore
cg06942445	COAD	female-bias	-0.245778	-17.3448	4.45205e-18	1.68658e-12	-0.10027	1	X	54947373	TRO	5'UTR-opensea
cg04613080	COAD	male-bias	0.199638	17.3212	4.63533e-18	1.75602e-12	0.00432033	1	X	150903211	CNGA2	TSS200-opensea
cg09614279	COAD	male-bias	0.132013	17.2811	4.96505e-18	1.88093e-12	0.1078	1	X	84189578	UBE2DNL	Body-island
cg00404599	COAD	female-bias	-0.286683	-17.2545	5.19675e-18	1.9687e-12	0.0348655	1	X	107018431	TSC22D3	1stExon-shore
cg00614938	COAD	male-bias	0.15173	17.1987	5.72042e-18	2.16709e-12	-0.0370659	1	X	108717536	GUCY2F	Body-opensea
cg03665601	COAD	female-bias	-0.368205	-17.1366	6.36588e-18	2.41161e-12	-0.0534049	1	X	77040152	ATRX	Body-shore
cg23698976	COAD	male-bias	0.193243	17.1277	6.4646e-18	2.449e-12	-0.037772	1	X	149396205	MIR2114	TSS200-opensea
cg00809111	COAD	female-bias	-0.224714	-17.063	7.23037e-18	2.7391e-12	0.0594565	1	X	130192134	FLJ30058	TSS200-island
cg02362246	COAD	male-bias	0.227606	16.9617	8.61984e-18	3.26548e-12	-0.0616362	1	X	12974819		IGR-opensea
cg20638572	COAD	male-bias	0.183722	16.9432	8.90329e-18	3.37286e-12	-0.00877395	1	X	76709434	FGF16	TSS1500-opensea
cg09024810	COAD	female-bias	-0.218967	-16.9266	9.16461e-18	3.47185e-12	-0.00136379	1	X	130217041	FLJ30058	Body-shore
cg02671603	COAD	male-bias	0.174475	16.8769	9.99472e-18	3.78633e-12	0.0358033	1	X	74146242	KIAA2022	TSS1500-shore
cg25691526	COAD	male-bias	0.266414	16.8621	1.02558e-17	3.88525e-12	0.108336	1	X	130964707	LOC286467	TSS200-opensea
cg17066973	COAD	female-bias	-0.156181	-16.8194	1.10527e-17	4.18711e-12	-0.0121441	1	X	154444148	VBP1	TSS1500-opensea
cg10440516	COAD	male-bias	0.199942	16.7938	1.156e-17	4.3793e-12	0.147467	1	X	103356134	MCART6	5'UTR-shore
cg07608505	COAD	female-bias	-0.229656	-16.7894	1.16488e-17	4.41296e-12	-0.0400763	1	X	101380476	TCEAL2	TSS200-opensea
cg17700139	COAD	female-bias	-0.251275	-16.7364	1.27862e-17	4.84382e-12	-0.228203	1	X	107980270	IRS4	TSS1500-shore
cg10159238	COAD	male-bias	0.165889	16.7042	1.35319e-17	5.12633e-12	0.0328817	1	X	69657408		IGR-shelf
cg12467143	COAD	female-bias	-0.218542	-16.6991	1.36546e-17	5.17283e-12	-0.0867091	1	X	11684543	ARHGAP6	TSS1500-island
cg23473396	COAD	female-bias	-0.242994	-16.6586	1.46634e-17	5.555e-12	-0.018183	1	X	25041134		IGR-island
cg15614573	COAD	male-bias	0.135656	16.6282	1.54731e-17	5.86172e-12	0.0957297	1	X	49122364	FOXP3	TSS1500-shelf
cg02416822	COAD	male-bias	0.203244	16.6213	1.56625e-17	5.93348e-12	0.0229113	1	X	136112268		IGR-shore
cg17032587	COAD	male-bias	0.160419	16.6085	1.60232e-17	6.07011e-12	0.0253742	1	X	150903247	CNGA2	1stExon-opensea
cg00267883	COAD	male-bias	0.123351	16.5695	1.71676e-17	6.50366e-12	0.0166373	1	X	129111502		IGR-shelf
cg04227026	COAD	male-bias	0.175365	16.5682	1.72095e-17	6.51954e-12	0.0715639	1	X	150884661	FATE1	1stExon-opensea
cg21131239	COAD	female-bias	-0.249199	-16.5229	1.86473e-17	7.06422e-12	-0.106312	1	X	74376811	ABCB7	TSS1500-opensea
cg00619443	COAD	female-bias	-0.301148	-16.5083	1.91408e-17	7.25115e-12	-0.0462113	1	X	110039536	CHRDL1	TSS1500-shore
cg21649182	COAD	male-bias	0.160054	16.4873	1.98679e-17	7.52663e-12	0.131133	1	X	135864872	ARHGEF6	TSS1500-opensea
cg23424962	COAD	female-bias	-0.266648	-16.4542	2.1073e-17	7.98316e-12	-0.0310242	1	X	122318339	GRIA3	5'UTR-shore
cg08609845	COAD	male-bias	0.173643	16.4445	2.14436e-17	8.12354e-12	0.134104	1	X	45060113	CXorf36	5'UTR-opensea
cg18396637	COAD	male-bias	0.133618	16.423	2.2283e-17	8.44152e-12	0.0860992	1	X	107016227	TSC22D3	Body-shelf
cg01465073	COAD	female-bias	-0.192285	-16.4066	2.29443e-17	8.69205e-12	-0.0731257	1	X	153152165		IGR-island
cg25141133	COAD	female-bias	-0.251242	-16.3721	2.44026e-17	9.24449e-12	0.00874699	1	X	12156437	FRMPD4	TSS200-shore
cg01523865	COAD	female-bias	-0.319715	-16.3128	2.71412e-17	1.0282e-11	-0.115757	1	X	136651179	ZIC3	Body-island
cg27053580	COAD	male-bias	0.196826	16.2904	2.82536e-17	1.07034e-11	-0.0525868	1	X	69269792	AWAT2	TSS200-opensea
cg21154599	COAD	female-bias	-0.335896	-16.2895	2.83005e-17	1.07211e-11	-0.083427	1	X	136507597		IGR-shore
cg09821007	COAD	female-bias	-0.122766	-16.2839	2.85847e-17	1.08288e-11	-0.0866494	1	X	68348763		IGR-island
cg17498624	COAD	male-bias	0.234353	16.2298	3.15132e-17	1.19382e-11	0.109198	1	X	72664587		IGR-shelf
cg13810915	COAD	male-bias	0.159875	16.1342	3.74498e-17	1.41872e-11	0.135976	1	X	55050253	ALAS2	Body-opensea
cg15840039	COAD	male-bias	0.177277	16.1043	3.95376e-17	1.49781e-11	-0.0736342	1	X	66788098	AR	TSS1500-opensea
cg05064925	COAD	female-bias	-0.321956	-16.0622	4.26738e-17	1.61663e-11	-0.0190127	1	X	107681469	COL4A6	1stExon-opensea
cg21644660	COAD	male-bias	0.160282	16.0621	4.26838e-17	1.617e-11	-0.0560107	1	X	108865686		IGR-shelf
cg23701759	COAD	female-bias	-0.254646	-16.0455	4.39874e-17	1.66639e-11	-0.014489	1	X	39959596	BCOR	5'UTR-island
cg07984302	COAD	male-bias	0.168694	16.0418	4.42871e-17	1.67774e-11	0.0814911	1	X	106754561		IGR-shelf
cg14828248	COAD	female-bias	-0.252902	-16.0224	4.58813e-17	1.73813e-11	-0.0331891	1	X	130206946	FLJ30058	5'UTR-island
cg11595135	COAD	female-bias	-0.226401	-15.9676	5.07008e-17	1.92072e-11	-0.0807594	1	X	136629694		IGR-island
cg08777147	COAD	female-bias	-0.192077	-15.9445	5.28852e-17	2.00347e-11	-0.00938707	1	X	39953550	BCOR	5'UTR-island
cg11179997	COAD	female-bias	-0.193544	-15.9233	5.49764e-17	2.08269e-11	-0.0464945	1	X	119125670		IGR-island
cg25832529	COAD	male-bias	0.214654	15.8867	5.87862e-17	2.22702e-11	0.0803429	1	X	77915772	ZCCHC5	TSS1500-opensea
cg10786329	COAD	female-bias	-0.18095	-15.852	6.26463e-17	2.37325e-11	-0.00371487	1	X	119125722		IGR-shore
cg10014219	COAD	male-bias	0.180063	15.8429	6.37024e-17	2.41326e-11	0.0490039	1	X	70447775	BCYRN1	Body-shelf
cg07890967	COAD	male-bias	0.17303	15.8257	6.57514e-17	2.49088e-11	0.111262	1	X	123470509		IGR-shelf
cg14699015	COAD	female-bias	-0.304593	-15.7857	7.07645e-17	2.68079e-11	0.0232419	1	X	107978897	IRS4	1stExon-island
cg03761923	COAD	male-bias	0.238269	15.7827	7.11607e-17	2.6958e-11	0.0337492	1	X	153946773	GAB3	Body-opensea
cg26071410	COAD	female-bias	-0.168722	-15.7734	7.23934e-17	2.7425e-11	-0.112728	1	X	35937714	CXorf22	TSS200-opensea
cg10428230	COAD	male-bias	0.192735	15.7661	7.33697e-17	2.77949e-11	-0.0246475	1	X	54526673		IGR-shelf
cg18827893	COAD	male-bias	0.171169	15.7381	7.72563e-17	2.92672e-11	0.0394599	1	X	27765005	DCAF8L2	5'UTR-opensea
cg18496053	COAD	female-bias	-0.217816	-15.7263	7.89561e-17	2.99112e-11	0.0410076	1	X	139587868	SOX3	TSS1500-island
cg05313921	COAD	male-bias	0.111636	15.7038	8.23211e-17	3.11859e-11	-0.0112837	1	X	84189658	UBE2DNL	Body-shore
cg23170483	COAD	female-bias	-0.21463	-15.6903	8.44037e-17	3.19749e-11	-0.13945	1	X	54508656	FGD1	Body-opensea
cg18633002	COAD	male-bias	0.145559	15.6307	9.42491e-17	3.57047e-11	-0.0550827	1	X	70145544	SLC7A3	3'UTR-opensea
cg23360535	COAD	female-bias	-0.259003	-15.6301	9.43521e-17	3.57437e-11	-0.053714	1	X	54947822	TRO	5'UTR-opensea
cg15375586	COAD	female-bias	-0.303897	-15.6254	9.51778e-17	3.60565e-11	0.0509677	1	X	79277933	TBX22	Body-opensea
cg04817724	COAD	female-bias	-0.180586	-15.6041	9.90172e-17	3.7511e-11	-0.0348756	1	X	103809991	IL1RAPL2	TSS1500-island
cg13082192	COAD	female-bias	-0.267727	-15.5914	1.01388e-16	3.84092e-11	-0.0114574	1	X	107980358	IRS4	TSS1500-shore
cg26623411	COAD	female-bias	-0.237611	-15.5853	1.02539e-16	3.88451e-11	-0.0180307	1	X	113816093		IGR-island
cg00832136	COAD	female-bias	-0.194153	-15.5715	1.05225e-16	3.98626e-11	-0.138779	1	X	35937697	CXorf22	TSS200-opensea
cg11825821	COAD	female-bias	-0.158544	-15.5605	1.07388e-16	4.06823e-11	-0.124835	1	X	68441536		IGR-island
cg11655867	COAD	male-bias	0.19807	15.5593	1.07627e-16	4.07725e-11	-0.0126477	1	X	12513550	FRMPD4	Body-opensea
cg07463743	COAD	male-bias	0.147724	15.5105	1.17883e-16	4.46579e-11	0.10757	1	X	39863342		IGR-shore
cg14745824	COAD	male-bias	0.138524	15.4547	1.30851e-16	4.95707e-11	0.0358746	1	X	68979753	EDA	3'UTR-opensea
cg06452893	COAD	male-bias	0.107109	15.4387	1.34817e-16	5.1073e-11	0.0183013	1	X	54825988	ITIH5L	TSS1500-opensea
cg06220755	COAD	male-bias	0.162155	15.3819	1.49998e-16	5.68243e-11	-0.00953395	1	X	17821058	RAI2	5'UTR-opensea
cg09665904	COAD	female-bias	-0.266583	-15.3512	1.58907e-16	6.01991e-11	-0.0732902	1	X	113816090		IGR-island
cg02847500	COAD	female-bias	-0.245533	-15.3189	1.6888e-16	6.39773e-11	-0.0833629	1	X	139587184	SOX3	1stExon-island
cg07673466	COAD	female-bias	-0.217846	-15.3085	1.72209e-16	6.52384e-11	0.0400782	1	X	70363469	NLGN3	TSS1500-opensea
cg09196081	COAD	female-bias	-0.160276	-15.3	1.74995e-16	6.62939e-11	-0.0192118	1	X	82762347	POU3F4	TSS1500-shore
cg14343151	COAD	female-bias	-0.155562	-15.2951	1.76623e-16	6.69106e-11	-0.0130833	1	X	99667001		IGR-island
cg06539694	COAD	female-bias	-0.202881	-15.2829	1.80732e-16	6.84672e-11	-0.115629	1	X	68348545		IGR-island
cg10501443	COAD	female-bias	-0.139966	-15.2755	1.83294e-16	6.94378e-11	-0.0519492	1	X	114468791	LRCH2	TSS200-shore
cg13340269	COAD	female-bias	-0.219424	-15.2678	1.85966e-16	7.04502e-11	0.0417724	1	X	100333778	TMEM35	TSS200-opensea
cg05555050	COAD	female-bias	-0.205333	-15.2194	2.03807e-16	7.72088e-11	0.00253269	1	X	103809805	IL1RAPL2	TSS1500-island
cg05565735	COAD	male-bias	0.134206	15.1964	2.12869e-16	8.06417e-11	0.0384068	1	X	119869295		IGR-shelf
cg10541169	COAD	female-bias	-0.252624	-15.1291	2.41903e-16	9.16408e-11	-0.0728427	1	X	99667041		IGR-island
cg12426996	COAD	male-bias	0.0763606	15.0737	2.6882e-16	1.01838e-10	0.0441315	1	X	123467006		IGR-island
cg17119559	COAD	male-bias	0.12045	15.0592	2.76382e-16	1.04703e-10	0.0553782	1	X	19100990	GPR64	5'UTR-opensea
cg06739534	COAD	male-bias	0.153673	15.0559	2.78111e-16	1.05358e-10	0.0444138	1	X	119863043		IGR-shelf
cg21943052	COAD	female-bias	-0.249693	-15.0505	2.81029e-16	1.06463e-10	0.0155517	1	X	152760157	BGN	TSS200-opensea
cg05078558	COAD	male-bias	0.147937	15.0441	2.84485e-16	1.07772e-10	-0.0106642	1	X	140269750		IGR-shore
cg06008640	COAD	male-bias	0.158044	15.0299	2.92271e-16	1.10722e-10	0.0731337	1	X	39864206		IGR-shore
cg17547578	COAD	male-bias	0.174687	14.8971	3.77097e-16	1.42857e-10	0.0310778	1	X	102983589	GLRA4	TSS200-opensea
cg12294334	COAD	female-bias	-0.217468	-14.8812	3.88823e-16	1.47299e-10	-0.0435116	1	X	66763501	AR	TSS1500-shore
cg03332892	COAD	male-bias	0.162994	14.86	4.05089e-16	1.53461e-10	0.0351764	1	X	9980397		IGR-shelf
cg25737241	COAD	male-bias	0.11335	14.8303	4.28966e-16	1.62506e-10	0.0321871	1	X	43739887	MAOB	Body-shore
cg00403724	COAD	male-bias	0.169451	14.8249	4.33417e-16	1.64193e-10	0.099077	1	X	99839289	TNMD	TSS1500-opensea
cg17407511	COAD	female-bias	-0.269774	-14.8167	4.40378e-16	1.6683e-10	-0.0864293	1	X	38080364	SRPX	TSS200-shore
cg21039523	COAD	female-bias	-0.195746	-14.8075	4.48237e-16	1.69807e-10	-0.162857	1	X	102469724	BEX4	TSS1500-shore
cg21626493	COAD	male-bias	0.174054	14.7791	4.73647e-16	1.79433e-10	-0.027801	1	X	114469591	LRCH2	TSS1500-shore
cg08476890	COAD	female-bias	-0.17979	-14.7642	4.87494e-16	1.84679e-10	-0.022949	1	X	138774601	MCF2	5'UTR-island
cg02063752	COAD	female-bias	-0.165344	-14.7364	5.14437e-16	1.94886e-10	-0.0430016	1	X	47054413	UBA1	5'UTR-shore
cg22203323	COAD	male-bias	0.0979487	14.7133	5.38115e-16	2.03856e-10	0.06096	1	X	49084529	CACNA1F	Body-shelf
cg00032666	COAD	male-bias	0.118187	14.7131	5.38329e-16	2.03937e-10	-0.0187949	1	X	149613398	MAMLD1	TSS1500-opensea
cg20950932	COAD	female-bias	-0.213789	-14.6913	5.61567e-16	2.1274e-10	-0.0136008	1	X	122317633	GRIA3	TSS1500-shore
cg00730224	COAD	male-bias	0.102278	14.6716	5.83513e-16	2.21054e-10	0.00887545	1	X	140982540	MAGEC3	Body-opensea
cg22265142	COAD	female-bias	-0.291592	-14.6423	6.17868e-16	2.34069e-10	-0.091692	1	X	47479101	SYN1	1stExon-island
cg13937075	COAD	female-bias	-0.315212	-14.603	6.67135e-16	2.52733e-10	-0.0552893	1	X	136113882	GPR101	TSS200-island
cg11494656	COAD	male-bias	0.109468	14.5987	6.72683e-16	2.54835e-10	0.097441	1	X	69487197	ARR3	TSS1500-opensea
cg24197116	COAD	male-bias	0.186986	14.597	6.74921e-16	2.55682e-10	0.0329207	1	X	68110972		IGR-shelf
cg00168417	COAD	male-bias	0.184768	14.5732	7.07098e-16	2.67872e-10	0.0929983	1	X	118285788	KIAA1210	TSS1500-shore
cg09331780	COAD	male-bias	0.198193	14.5502	7.39666e-16	2.8021e-10	0.104697	1	X	84364419	SATL1	TSS1500-opensea
cg19885926	COAD	female-bias	-0.188685	-14.4969	8.21232e-16	3.1111e-10	-0.0275075	1	X	71350942	NHSL2	Body-island
cg21907794	COAD	male-bias	0.147396	14.4726	8.61361e-16	3.26312e-10	0.000102273	1	X	69262096	AWAT2	Body-opensea
cg23543821	COAD	male-bias	0.121573	14.4697	8.66395e-16	3.28219e-10	0.00724486	1	X	120182714	GLUD2	1stExon-shore
cg23245720	COAD	female-bias	-0.250346	-14.4577	8.86959e-16	3.3601e-10	-0.212895	1	X	133680549	MGC16121	Body-island
cg20457259	COAD	female-bias	-0.209583	-14.4562	8.89703e-16	3.37049e-10	-0.080721	1	X	25040808		IGR-shore
cg05177544	COAD	male-bias	0.212005	14.4384	9.21467e-16	3.49082e-10	0.0966762	1	X	106245868		IGR-shelf
cg01364907	COAD	male-bias	0.169376	14.4264	9.43425e-16	3.574e-10	-0.00237425	1	X	24336335		IGR-shelf
cg25934633	COAD	male-bias	0.101669	14.3999	9.94157e-16	3.76619e-10	0.00474334	1	X	51153528		IGR-shelf
cg23846114	COAD	male-bias	0.139018	14.3519	1.09304e-15	4.1408e-10	-0.0865261	1	X	150867161	PRRG3	5'UTR-shelf
cg23644934	COAD	male-bias	0.19008	14.3202	1.16379e-15	4.40882e-10	0.0534294	1	X	109763406	TDGF3	TSS200-opensea
cg03788610	COAD	male-bias	0.123603	14.2945	1.2248e-15	4.63993e-10	0.111588	1	X	102984217	GLRA4	TSS1500-opensea
cg01058932	COAD	male-bias	0.143624	14.2941	1.22559e-15	4.64293e-10	-0.0281813	1	X	55021626	PFKFB1	TSS1500-opensea
cg04077363	COAD	female-bias	-0.169731	-14.2856	1.24655e-15	4.72233e-10	-0.136788	1	X	102531881	TCEAL5	TSS200-opensea
cg19022384	COAD	female-bias	-0.262535	-14.2523	1.33171e-15	5.04496e-10	-0.0155128	1	X	136509451		IGR-island
cg12542857	COAD	male-bias	0.0528098	14.2092	1.45121e-15	5.49767e-10	0.0460161	1	X	107400064	COL4A6	3'UTR-opensea
cg11166197	COAD	male-bias	0.193427	14.1767	1.54834e-15	5.86563e-10	0.121106	1	X	151561584	GABRA3	5'UTR-opensea
cg26778358	COAD	female-bias	-0.304325	-14.1738	1.55727e-15	5.89945e-10	0.0147353	1	X	136135110		IGR-island
cg04529406	COAD	male-bias	0.173001	14.146	1.64651e-15	6.23751e-10	0.0587046	1	X	118897145		IGR-shelf
cg13868987	COAD	female-bias	-0.228064	-14.1367	1.67742e-15	6.35463e-10	-0.0203796	1	X	11683131	ARHGAP6	1stExon-island
cg02180347	COAD	male-bias	0.158623	14.1249	1.71744e-15	6.50622e-10	0.0892955	1	X	24329961	FAM48B2	1stExon-shore
cg04402798	COAD	female-bias	-0.364387	-14.0984	1.81111e-15	6.86109e-10	-0.153893	1	X	37003511		IGR-island
cg06794323	COAD	female-bias	-0.250203	-14.0615	1.95039e-15	7.38872e-10	-0.0323604	1	X	43518105	MAOA	Body-shelf
cg12553336	COAD	male-bias	0.118539	14.0553	1.97451e-15	7.4801e-10	-0.0349854	1	X	153090536	PDZD4	Body-shelf
cg04069419	COAD	female-bias	-0.225275	-14.029	2.08193e-15	7.88706e-10	-0.105572	1	X	151619939	GABRA3	TSS200-opensea
cg00780578	COAD	male-bias	0.171833	14.0019	2.19859e-15	8.32897e-10	0.0142887	1	X	68727150	FAM155B	Body-shore
cg18395615	COAD	female-bias	-0.24632	-13.9768	2.31266e-15	8.76113e-10	-0.0584344	1	X	103499807	ESX1	TSS1500-island
cg19930575	COAD	male-bias	0.123634	13.9584	2.40031e-15	9.09317e-10	0.0884899	1	X	151122266	GABRE	3'UTR-opensea
cg10622126	COAD	male-bias	0.166342	13.936	2.51172e-15	9.51522e-10	-0.00341578	1	X	147598391	AFF2	Body-opensea
cg19997062	COAD	female-bias	-0.289085	-13.9273	2.55623e-15	9.68385e-10	-0.0738578	1	X	144900177	SLITRK2	5'UTR-island
cg22597771	COAD	male-bias	0.139962	13.9137	2.62729e-15	9.95306e-10	0.0506513	1	X	151336548	GABRA3	3'UTR-opensea
cg22145512	COAD	male-bias	0.168429	13.8812	2.80632e-15	1.06313e-09	0.110624	1	X	100245441	ARL13A	Body-opensea
cg24974356	COAD	male-bias	0.196057	13.8563	2.9513e-15	1.11805e-09	0.030119	1	X	103035890	PLP1	Body-opensea
cg03450733	COAD	female-bias	-0.270662	-13.848	3.00181e-15	1.13719e-09	-0.07093	1	X	25024314	ARX	Body-shore
cg06455206	COAD	female-bias	-0.288337	-13.8357	3.07778e-15	1.16596e-09	-0.0138676	1	X	49643431	USP27X	TSS1500-island
cg09076540	COAD	female-bias	-0.226109	-13.8083	3.25399e-15	1.23272e-09	-0.00702115	1	X	139590116		IGR-island
cg12737160	COAD	female-bias	-0.293648	-13.7747	3.48483e-15	1.32017e-09	0.0129345	1	X	107681482	COL4A6	1stExon-opensea
cg02433685	COAD	female-bias	-0.13843	-13.7629	3.56975e-15	1.35234e-09	-0.0538297	1	X	149716604		IGR-shore
cg03650842	COAD	female-bias	-0.212216	-13.7612	3.58195e-15	1.35696e-09	-0.0330171	1	X	63424088	FAM123B	5'UTR-shore
cg12707233	COAD	female-bias	-0.180822	-13.7606	3.58648e-15	1.35868e-09	-0.0145827	1	X	54384964	WNK3	TSS1500-island
cg16426291	COAD	male-bias	0.138432	13.7545	3.63145e-15	1.37571e-09	0.0291697	1	X	71793639	HDAC8	TSS1500-opensea
cg14349394	COAD	male-bias	0.163244	13.7392	3.74655e-15	1.41932e-09	0.08362	1	X	119151773		IGR-shelf
cg17529435	COAD	female-bias	-0.170748	-13.7271	3.84039e-15	1.45487e-09	0.0547065	1	X	113816304		IGR-island
cg00779763	COAD	female-bias	-0.315563	-13.7265	3.84503e-15	1.45662e-09	-0.0862957	1	X	47479114	SYN1	1stExon-island
cg26968501	COAD	female-bias	-0.248659	-13.7182	3.91056e-15	1.48145e-09	0.00543222	1	X	82765734		IGR-island
cg12742739	COAD	male-bias	0.0958235	13.6967	4.08617e-15	1.54798e-09	0.0533859	1	X	153906447	GAB3	3'UTR-opensea
cg10794473	COAD	male-bias	0.159882	13.689	4.15139e-15	1.57268e-09	0.0551432	1	X	63006350	MIR1468	TSS1500-opensea
cg26931498	COAD	male-bias	0.187174	13.6859	4.17816e-15	1.58283e-09	0.0711532	1	X	53031398		IGR-shore
cg04342295	COAD	female-bias	-0.161542	-13.6812	4.21828e-15	1.59802e-09	-0.00244258	1	X	119125659		IGR-island
cg05833518	COAD	female-bias	-0.236112	-13.6805	4.22435e-15	1.60032e-09	-0.0681937	1	X	49832094	CLCN5	Body-opensea
cg04070122	COAD	female-bias	-0.168883	-13.6548	4.45282e-15	1.68688e-09	-0.142196	1	X	154493215	RAB39B	Body-shore
cg06431415	COAD	male-bias	0.184663	13.6173	4.80922e-15	1.82189e-09	0.0637737	1	X	133115985	GPC3	Body-shelf
cg03887682	COAD	male-bias	0.17304	13.6092	4.89021e-15	1.85257e-09	0.0141834	1	X	24576369	PCYT1B	3'UTR-opensea
cg06068202	COAD	female-bias	-0.238266	-13.5932	5.05436e-15	1.91476e-09	-0.0329437	1	X	150343148		IGR-island
cg05921207	COAD	female-bias	-0.185626	-13.5849	5.14085e-15	1.94752e-09	-0.132802	1	X	110038886	CHRDL1	5'UTR-shore
cg27424407	COAD	female-bias	-0.242543	-13.5792	5.20146e-15	1.97048e-09	-0.117626	1	X	34674190	TMEM47	Body-shore
cg16700576	COAD	female-bias	-0.142138	-13.5652	5.35413e-15	2.02832e-09	-0.0927911	1	X	67913309	STARD8	TSS200-island
cg01037726	COAD	male-bias	0.179425	13.5575	5.43962e-15	2.06071e-09	-0.0527058	1	X	152937549	PNCK	Body-shore
cg26140836	COAD	male-bias	0.147438	13.5441	5.59213e-15	2.11848e-09	0.0506982	1	X	108870738		IGR-shelf
cg02268650	COAD	female-bias	-0.2052	-13.5347	5.70179e-15	2.16003e-09	-0.15541	1	X	68348465		IGR-island
cg03166428	COAD	female-bias	-0.229821	-13.5293	5.76607e-15	2.18438e-09	-0.0334966	1	X	152760167	BGN	TSS200-opensea
cg05463948	COAD	male-bias	0.170665	13.5291	5.76732e-15	2.18485e-09	0.0936264	1	X	50652429	BMP15	TSS1500-opensea
cg05131629	COAD	male-bias	0.186772	13.5284	5.77571e-15	2.18803e-09	0.000703758	1	X	41307114	NYX	5'UTR-opensea
cg03699508	COAD	male-bias	0.100934	13.5113	5.98371e-15	2.26683e-09	0.0350159	1	X	79280150	TBX22	Body-opensea
cg02915422	COAD	female-bias	-0.239238	-13.497	6.16346e-15	2.33492e-09	0.0348165	1	X	150863331		IGR-island
cg16719118	COAD	male-bias	0.149253	13.4768	6.42605e-15	2.4344e-09	-0.00732162	1	X	147132289		IGR-shore
cg23180270	COAD	female-bias	-0.244542	-13.4758	6.43961e-15	2.43954e-09	-0.143037	1	X	119006837	RNF113A	TSS1500-shore
cg24462545	COAD	male-bias	0.123514	13.4588	6.67105e-15	2.52721e-09	0.0921791	1	X	30254216	MAGEB3	Body-opensea
cg14924469	COAD	male-bias	0.280726	13.4499	6.79475e-15	2.57408e-09	0.0975468	1	X	130964846	LOC286467	TSS200-opensea
cg05915658	COAD	male-bias	0.150982	13.4487	6.81143e-15	2.5804e-09	-0.0200719	1	X	132552653		IGR-shelf
cg23083672	COAD	female-bias	-0.162582	-13.4319	7.05366e-15	2.67216e-09	0.08327	1	X	13587603	EGFL6	TSS200-shore
cg09562455	COAD	female-bias	-0.288169	-13.4215	7.20697e-15	2.73024e-09	-0.00361182	1	X	30327490	NR0B1	5'UTR-island
cg19127840	COAD	male-bias	0.170286	13.4004	7.53004e-15	2.85263e-09	0.122634	1	X	65238616	MIR223	TSS200-opensea
cg00467854	COAD	female-bias	-0.150155	-13.3633	8.13538e-15	3.08195e-09	-0.0614872	1	X	25040358		IGR-shore
cg22848013	COAD	male-bias	0.0926891	13.3089	9.11244e-15	3.45209e-09	0.0284458	1	X	152082879	ZNF185	TSS200-opensea
cg26011743	COAD	male-bias	0.173042	13.2958	9.36635e-15	3.54828e-09	0.0230088	1	X	36794119		IGR-opensea
cg05870108	COAD	female-bias	-0.288172	-13.2939	9.40325e-15	3.56226e-09	-0.127225	1	X	106749745		IGR-shore
cg21768287	COAD	female-bias	-0.234642	-13.2523	1.02581e-14	3.8861e-09	-0.0784555	1	X	150068356	CD99L2	TSS1500-shore
cg20199120	COAD	male-bias	0.173906	13.2457	1.04003e-14	3.93998e-09	0.106007	1	X	13583772		IGR-shelf
cg09132264	COAD	female-bias	-0.185274	-13.2401	1.05233e-14	3.98657e-09	-0.0305024	1	X	8699141	KAL1	Body-island
cg20021806	COAD	male-bias	0.123181	13.2311	1.07246e-14	4.06283e-09	-0.0283732	1	X	68350862		IGR-shelf
cg25171798	COAD	male-bias	0.173204	13.2204	1.09674e-14	4.15479e-09	0.0493536	1	X	103354340	MCART6	5'UTR-shelf
cg18447077	COAD	male-bias	0.0698856	13.217	1.10466e-14	4.18482e-09	-0.00367209	1	X	77912605	ZCCHC5	Body-opensea
cg01742164	COAD	male-bias	0.101968	13.1537	1.26192e-14	4.78056e-09	0.0142274	1	X	149935904	CD99L2	3'UTR-opensea
cg20503835	COAD	male-bias	0.14183	13.1535	1.26251e-14	4.7828e-09	0.0783704	1	X	67715015		IGR-shelf
cg01888389	COAD	female-bias	-0.226393	-13.1493	1.27363e-14	4.82494e-09	0.0138684	1	X	44735560	KDM6A	Body-shelf
cg03765359	COAD	female-bias	-0.315762	-13.1467	1.28066e-14	4.85155e-09	-0.192785	1	X	47479190	SYN1	5'UTR-island
cg23140620	COAD	male-bias	0.235064	13.0781	1.48026e-14	5.6077e-09	-0.000137176	1	X	110398983	PAK3	Body-opensea
cg04182378	COAD	female-bias	-0.169265	-13.0673	1.51433e-14	5.73678e-09	-0.0423537	1	X	21958416	SMS	TSS1500-shore
cg02492445	COAD	female-bias	-0.138376	-13.0616	1.53276e-14	5.80662e-09	0.00723469	1	X	136631809		IGR-shore
cg10142252	COAD	female-bias	-0.197445	-13.0306	1.6368e-14	6.20075e-09	-0.0505731	1	X	130192035	FLJ30058	TSS200-shore
cg26294718	COAD	male-bias	0.199722	13.017	1.68449e-14	6.3814e-09	0.0123005	1	X	135864527	ARHGEF6	TSS1500-opensea
cg06742180	COAD	male-bias	0.173646	13.0134	1.69771e-14	6.43148e-09	0.0123219	1	X	123039177	XIAP	Body-opensea
cg11019134	COAD	male-bias	0.130376	12.9315	2.02029e-14	7.65353e-09	0.0925807	1	X	64772618		IGR-shore
cg10088365	COAD	female-bias	-0.217838	-12.9238	2.05396e-14	7.78108e-09	-0.19106	1	X	8700400	KAL1	TSS200-island
cg21773079	COAD	male-bias	0.119446	12.9146	2.09481e-14	7.93585e-09	0.0322333	1	X	107224121	TEX13B	3'UTR-opensea
cg05361475	COAD	male-bias	0.0999192	12.9002	2.1599e-14	8.18243e-09	0.00539905	1	X	74744538	ZDHHC15	TSS1500-shore
cg06892157	COAD	male-bias	0.0990791	12.8832	2.23979e-14	8.48508e-09	0.0409293	1	X	129084138		IGR-shelf
cg01558501	COAD	female-bias	-0.183571	-12.8632	2.33775e-14	8.85617e-09	-0.13209	1	X	99667223		IGR-island
cg00960300	COAD	male-bias	0.129758	12.8491	2.40916e-14	9.12669e-09	-0.0640692	1	X	70886827	BCYRN1	Body-shore
[truncated: 3,665 more rows]
