# Supplementary material for: Attenuated sex-related DNA methylation differences in cancer highlight the magnitude bias mediating existing disparities
Source: Biol Sex Differ. 2024 Dec 23;15:106. doi: 10.1186/s13293-024-00682-4 (PMC11664931; doi:10.1186/s13293-024-00682-4)
Supplement: Supplementary file 5 — Supplementary material 5. [file 13293_2024_682_MOESM5_ESM.xlsx]

## Sheet: XCI
Cancer	direction	description	support	oddRatios	Pvalue	bonf
BLCA	male-bias	all	47	92.3601	9.77565e-59	7.03847e-57
BLCA	male-bias	escape	7	37.7577	2.94685e-09	2.12173e-07
BLCA	male-bias	inactive	33	54.6879	3.30026e-39	2.37619e-37
BLCA	male-bias	variable	7	27.2858	2.38001e-08	1.71361e-06
BLCA	female-bias	all	146	188.938	1.04333e-199	7.51195e-198
BLCA	female-bias	escape	8	14.8887	2.12457e-07	1.52969e-05
BLCA	female-bias	inactive	116	126.731	8.63042e-158	6.2139e-156
BLCA	female-bias	variable	22	38.5427	2.16971e-25	1.56219e-23
COAD	male-bias	all	172	105.423	2.53273e-214	1.82356e-212
COAD	male-bias	escape	20	35.3586	2.54262e-22	1.83069e-20
COAD	male-bias	inactive	108	51.3652	1.13755e-119	8.19035e-118
COAD	male-bias	variable	44	86.6151	1.98274e-59	1.42757e-57
COAD	female-bias	all	129	173.618	1.06695e-174	7.68207e-173
COAD	female-bias	escape	19	54.2489	1.32721e-24	9.55591e-23
COAD	female-bias	inactive	89	79.4933	4.0888e-111	2.94394e-109
COAD	female-bias	variable	21	41.287	6.05666e-25	4.3608e-23
HNSC	male-bias	all	106	75.5627	3.54084e-125	2.54941e-123
HNSC	male-bias	escape	15	36.3721	1.28772e-17	9.27162e-16
HNSC	male-bias	inactive	60	33.5941	2.59536e-60	1.86866e-58
HNSC	male-bias	variable	31	75.1222	2.85756e-42	2.05745e-40
HNSC	female-bias	all	86	111.835	1.09742e-109	7.90144e-108
HNSC	female-bias	escape	11	35.3982	2.40439e-13	1.73116e-11
HNSC	female-bias	inactive	61	64.4948	1.23572e-73	8.89717e-72
HNSC	female-bias	variable	14	34.5684	2.10137e-16	1.51298e-14
KIRC	male-bias	all	100	68.1267	1.06725e-115	7.6842e-114
KIRC	male-bias	escape	16	40.9996	2.13984e-19	1.54069e-17
KIRC	male-bias	inactive	62	37.0877	3.05066e-64	2.19647e-62
KIRC	male-bias	variable	22	43.9794	1.53692e-26	1.10659e-24
KIRC	female-bias	all	112	29.3521	6.97205e-102	5.01988e-100
KIRC	female-bias	escape	23	38.6413	5.86284e-26	4.22124e-24
KIRC	female-bias	inactive	67	19.1363	5.11315e-54	3.68147e-52
KIRC	female-bias	variable	22	23.7865	3.23449e-21	2.32883e-19
KIRP	male-bias	all	82	60.26	7.88023e-93	5.67376e-91
KIRP	male-bias	escape	14	41.5807	2.45412e-17	1.76697e-15
KIRP	male-bias	inactive	47	29.7748	5.49931e-46	3.95951e-44
KIRP	male-bias	variable	21	49.7841	1.84026e-26	1.32499e-24
KIRP	female-bias	all	122	159.168	2.07936e-163	1.49714e-161
KIRP	female-bias	escape	13	32.9132	4.91316e-15	3.53748e-13
KIRP	female-bias	inactive	83	73.1806	4.07144e-102	2.93144e-100
KIRP	female-bias	variable	26	59.7068	7.22108e-34	5.19917e-32
LIHC	male-bias	all	107	65.5613	1.98354e-122	1.42815e-120
LIHC	male-bias	escape	17	41.8689	1.47181e-20	1.0597e-18
LIHC	male-bias	inactive	62	32.0331	3.35363e-61	2.41461e-59
LIHC	male-bias	variable	28	57.2693	1.09558e-35	7.88816e-34
LIHC	female-bias	all	89	95.786	2.30794e-110	1.66172e-108
LIHC	female-bias	escape	7	19.1168	2.35724e-07	1.69722e-05
LIHC	female-bias	inactive	68	69.4385	3.96923e-83	2.85785e-81
LIHC	female-bias	variable	14	30.9239	8.63809e-16	6.21943e-14
LUAD	male-bias	all	89	69.778	9.04643e-104	6.51343e-102
LUAD	male-bias	escape	17	53.0025	3.62075e-22	2.60694e-20
LUAD	male-bias	inactive	50	31.4293	1.23229e-49	8.87247e-48
LUAD	male-bias	variable	22	51.4187	7.25854e-28	5.22615e-26
LUAD	female-bias	all	78	164.08	2.85467e-105	2.05537e-103
LUAD	female-bias	escape	12	50.2206	4.71579e-16	3.39537e-14
LUAD	female-bias	inactive	50	61.6593	3.89943e-60	2.80759e-58
LUAD	female-bias	variable	16	51.2021	6.57923e-21	4.73705e-19
LUSC	male-bias	all	102	72.9587	1.28524e-119	9.25372e-118
LUSC	male-bias	escape	22	67.9521	6.45314e-30	4.64626e-28
LUSC	male-bias	inactive	56	31.0744	5.03109e-55	3.62238e-53
LUSC	male-bias	variable	24	50.8404	5.20127e-30	3.74491e-28
LUSC	female-bias	all	85	134.488	1.79029e-111	1.28901e-109
LUSC	female-bias	escape	8	25.6671	3.91471e-09	2.81859e-07
LUSC	female-bias	inactive	61	72.9662	1.02985e-75	7.41491e-74
LUSC	female-bias	variable	16	44.1196	5.50267e-20	3.96192e-18
THCA	male-bias	all	77	71.8123	1.28364e-90	9.24223e-89
THCA	male-bias	escape	9	26.8399	3.05996e-10	2.20317e-08
THCA	male-bias	inactive	50	41.0941	5.34576e-54	3.84895e-52
THCA	male-bias	variable	18	46.3742	1.50123e-22	1.08088e-20
THCA	female-bias	all	103	169.178	3.39983e-139	2.44788e-137
THCA	female-bias	escape	8	21.7272	1.33019e-08	9.57736e-07
THCA	female-bias	inactive	78	97.0998	4.30376e-102	3.09871e-100
THCA	female-bias	variable	17	39.696	2.10249e-20	1.51379e-18

## Sheet: Strata
strata	Cancer	support	oddRatios	downCI	upCI	P value	direction	FDR
S1	LIHC	140	1.07301	0.856083	1.34163	0.537312	maleBias	0.767589
S2	LIHC	22	0.54961	0.337633	0.852737	0.00579349	maleBias	0.0306714
S3	LIHC	82	0.975563	0.748071	1.26127	0.898015	maleBias	1
S4	LIHC	0	0	0	1.91059	0.263249	maleBias	0.528791
S5	LIHC	2	0.904755	0.105963	3.48405	1	maleBias	1
S1	LUAD	122	1.25401	0.976744	1.60707	0.0689897	maleBias	0.206969
S2	LUAD	9	0.277018	0.124802	0.53667	8.83703e-06	maleBias	0.000132555
S3	LUAD	83	1.36972	1.04058	1.79007	0.0218007	maleBias	0.0862291
S4	LUAD	0	0	0	6.25671	1	maleBias	1
S5	LUAD	1	0.487526	0.0120881	2.85272	0.723474	maleBias	0.930181
S1	LUSC	127	1.2917	1.01013	1.64916	0.0354665	maleBias	0.122769
S2	LUSC	11	0.324184	0.159281	0.592462	2.45802e-05	maleBias	0.000276528
S3	LUSC	61	0.877226	0.646669	1.17503	0.395	maleBias	0.62673
S4	LUSC	1	1.95167	0.0460023	12.909	0.417541	maleBias	0.62673
S5	LUSC	4	2.0736	0.541248	5.68802	0.14177	maleBias	0.354424
S1	COAD	242	1.30691	1.09171	1.56341	0.0029863	maleBias	0.0188054
S2	COAD	31	0.492004	0.328483	0.713029	4.97703e-05	maleBias	0.000497703
S3	COAD	103	0.738883	0.586525	0.923895	0.006602	maleBias	0.0312727
S4	COAD	0	0	0	1.1193	0.0745135	maleBias	0.216329
S5	COAD	0	0	0	0.922439	0.0318887	maleBias	0.119582
S1	KIRC	88	1.04226	0.784119	1.3799	0.780034	maleBias	0.961685
S2	KIRC	17	0.702092	0.39923	1.15904	0.183082	maleBias	0.411934
S3	KIRC	52	0.982899	0.703132	1.35444	1	maleBias	1
S4	KIRC	4	3.21072	0.834067	8.87561	0.0434267	maleBias	0.139586
S5	KIRC	3	2.13427	0.423789	6.65438	0.177844	maleBias	0.41041
S1	KIRP	109	1.38074	1.05392	1.80669	0.0172004	maleBias	0.0737159
S2	KIRP	18	0.708217	0.409795	1.15339	0.192699	maleBias	0.422997
S3	KIRP	49	0.847799	0.603207	1.17243	0.349772	maleBias	0.62673
S4	KIRP	1	0.743941	0.0183769	4.38911	1	maleBias	1
S5	KIRP	0	0	0	2.26922	0.413305	maleBias	0.62673
S1	THCA	68	0.828047	0.605779	1.12347	0.236175	maleBias	0.49432
S2	THCA	23	1.14726	0.704541	1.78968	0.553528	maleBias	0.778398
S3	THCA	46	0.96248	0.673646	1.3528	0.866307	maleBias	1
S4	THCA	0	0	0	3.26153	0.631534	maleBias	0.845998
S5	THCA	2	1.48358	0.174443	5.66632	0.398381	maleBias	0.62673
S1	BLCA	41	0.843448	0.559822	1.25525	0.442543	maleBias	0.642401
S2	BLCA	10	0.820395	0.38074	1.5772	0.645639	maleBias	0.845998
S3	BLCA	35	1.52013	0.987901	2.29692	0.0429195	maleBias	0.139586
S4	BLCA	0	0	0	7.977	1	maleBias	1
S5	BLCA	0	0	0	6.58253	1	maleBias	1
S1	HNSC	156	1.54428	1.2263	1.94424	0.00016889	maleBias	0.00138183
S2	HNSC	9	0.234145	0.105679	0.452586	1.46862e-07	maleBias	2.64352e-06
S3	HNSC	58	0.716525	0.526998	0.96048	0.0220363	maleBias	0.0862291
S4	HNSC	4	2.19886	0.570826	6.08652	0.123707	maleBias	0.321801
S5	HNSC	0	0	0	1.61106	0.173484	maleBias	0.41041
S1	LIHC	138	1.99957	1.54263	2.59573	7.51385e-08	femaleBias	1.69062e-06
S2	LIHC	17	0.600497	0.34208	0.988899	0.0474115	femaleBias	0.147139
S3	LIHC	41	0.615648	0.427623	0.86755	0.00415021	femaleBias	0.0233449
S4	LIHC	0	0	0	2.70743	0.648599	femaleBias	0.845998
S5	LIHC	0	0	0	2.3541	0.40865	femaleBias	0.62673
S1	LUAD	92	1.2056	0.905895	1.59991	0.199984	femaleBias	0.428537
S2	LUAD	11	0.454107	0.222175	0.834632	0.00652864	femaleBias	0.0312727
S3	LUAD	53	1.04818	0.750084	1.44497	0.745885	femaleBias	0.945488
S4	LUAD	0	0	0	8.20702	1	femaleBias	1
S5	LUAD	0	0	0	2.40269	0.408083	femaleBias	0.62673
S1	LUSC	120	1.57259	1.20805	2.04664	0.000625486	femaleBias	0.00469115
S2	LUSC	16	0.575933	0.322047	0.961666	0.0348813	femaleBias	0.122769
S3	LUSC	55	0.944215	0.682997	1.2875	0.759478	femaleBias	0.949347
S4	LUSC	0	0	0	9.00277	1	femaleBias	1
S5	LUSC	0	0	0	2.14986	0.419877	femaleBias	0.62673
S1	COAD	276	2.13353	1.76789	2.57746	5.45096e-16	femaleBias	4.90586e-14
S2	COAD	27	0.471927	0.305634	0.701056	5.75609e-05	femaleBias	0.000518048
S3	COAD	90	0.704749	0.551046	0.89341	0.00313424	femaleBias	0.0188054
S4	COAD	2	0.676079	0.0793161	2.59539	1	femaleBias	1
S5	COAD	3	0.851885	0.16993	2.63572	1	femaleBias	1
S1	KIRC	71	0.877192	0.644474	1.18611	0.417457	femaleBias	0.62673
S2	KIRC	20	0.952954	0.565357	1.52593	1	femaleBias	1
S3	KIRC	52	1.1417	0.812157	1.58371	0.400344	femaleBias	0.62673
S4	KIRC	0	0	0	3.14368	0.633849	femaleBias	0.845998
S5	KIRC	1	0.76162	0.0188592	4.46773	1	femaleBias	1
S1	KIRP	118	0.995413	0.780162	1.26602	1	femaleBias	1
S2	KIRP	30	0.936011	0.615503	1.37769	0.848442	femaleBias	1
S3	KIRP	62	0.818071	0.605801	1.09085	0.170396	femaleBias	0.41041
S4	KIRP	0	0	0	2.13452	0.420269	femaleBias	0.62673
S5	KIRP	0	0	0	1.7289	0.276146	femaleBias	0.528791
S1	THCA	98	1.24347	0.940804	1.63985	0.125145	femaleBias	0.321801
S2	THCA	18	0.754371	0.436124	1.22992	0.31563	femaleBias	0.591807
S3	THCA	64	1.28056	0.938429	1.73017	0.111884	femaleBias	0.305138
S4	THCA	0	0	0	2.86796	0.642083	femaleBias	0.845998
S5	THCA	0	0	0	2.39677	0.408861	femaleBias	0.62673
S1	BLCA	262	1.69364	1.40857	2.03706	1.18473e-08	femaleBias	3.5542e-07
S2	BLCA	52	0.988401	0.720401	1.33263	1	femaleBias	1
S3	BLCA	75	0.583987	0.448178	0.752497	1.30177e-05	femaleBias	0.00016737
S4	BLCA	0	0	0	1.70564	0.272591	femaleBias	0.528791
S5	BLCA	0	0	0	1.40757	0.111056	femaleBias	0.305138
S1	HNSC	176	2.39826	1.88301	3.06256	2.29007e-13	femaleBias	1.03053e-11
S2	HNSC	18	0.52988	0.30781	0.858661	0.0071174	femaleBias	0.0320283
S3	HNSC	48	0.621965	0.444791	0.854092	0.00210543	femaleBias	0.014576
S4	HNSC	0	0	0	2.07618	0.424784	femaleBias	0.62673
S5	HNSC	0	0	0	1.74165	0.274768	femaleBias	0.528791

## Sheet: genomic function
Cancer	direction	description	support	oddsRatio	FDR
LIHC	male-bias	opensea	193	2.03916	3.54e-11
LIHC	male-bias	shore	76	0.799548	1
LIHC	male-bias	shelf	72	2.32563	1.39e-08
LIHC	male-bias	island	40	0.231357	1
LUAD	male-bias	opensea	142	2.06433	8.19e-09
LUAD	male-bias	shore	55	0.797792	1
LUAD	male-bias	shelf	59	2.72717	3.18e-09
LUAD	male-bias	island	22	0.168267	1
LUSC	male-bias	opensea	152	2.31748	1.27e-11
LUSC	male-bias	shore	58	0.811606	1
LUSC	male-bias	shelf	59	2.66755	5.65e-09
LUSC	male-bias	island	18	0.126059	1
COAD	male-bias	opensea	286	2.08683	1.71e-16
COAD	male-bias	shore	102	0.738348	1
COAD	male-bias	shelf	137	3.28821	1.07e-25
COAD	male-bias	island	22	0.0864216	1
KIRC	male-bias	opensea	102	1.13396	0.400496
KIRC	male-bias	shore	82	1.37462	0.0274053
KIRC	male-bias	shelf	34	1.40289	0.110316
KIRC	male-bias	island	57	0.529803	1
KIRP	male-bias	opensea	131	2.45134	5.74e-11
KIRP	male-bias	shore	44	0.751335	1
KIRP	male-bias	shelf	34	1.68715	0.0137866
KIRP	male-bias	island	25	0.241515	1
THCA	male-bias	opensea	86	1.45691	0.0154515
THCA	male-bias	shore	45	0.955253	1
THCA	male-bias	shelf	35	2.11519	0.000414304
THCA	male-bias	island	31	0.390428	1
BLCA	male-bias	opensea	46	1.35351	0.16511
BLCA	male-bias	shore	26	0.937097	1
BLCA	male-bias	shelf	29	3.43019	9.61e-07
BLCA	male-bias	island	14	0.265725	1
HNSC	male-bias	opensea	188	2.80509	1.06e-18
HNSC	male-bias	shore	48	0.567314	1
HNSC	male-bias	shelf	58	2.23227	1.04e-06
HNSC	male-bias	island	26	0.174941	1
LIHC	female-bias	opensea	45	0.396715	1
LIHC	female-bias	shore	96	1.77156	3.13e-05
LIHC	female-bias	shelf	8	0.30422	1
LIHC	female-bias	island	121	1.60386	0.000260914
LUAD	female-bias	opensea	46	0.540854	1
LUAD	female-bias	shore	78	1.85617	5.82e-05
LUAD	female-bias	shelf	16	0.817004	1
LUAD	female-bias	island	74	1.03591	0.90686
LUSC	female-bias	opensea	71	0.829667	1
LUSC	female-bias	shore	87	1.74337	0.000112489
LUSC	female-bias	shelf	17	0.760963	1
LUSC	female-bias	island	72	0.775706	1
COAD	female-bias	opensea	63	0.278347	1
COAD	female-bias	shore	168	1.66702	5.01e-07
COAD	female-bias	shelf	18	0.371573	1
COAD	female-bias	island	244	2.02683	7.71e-14
KIRC	female-bias	opensea	142	0.877964	1
KIRC	female-bias	shore	169	1.92639	3.51e-10
KIRC	female-bias	shelf	44	1.0696	0.782852
KIRC	female-bias	island	98	0.559249	1
KIRP	female-bias	opensea	70	0.545669	1
KIRP	female-bias	shore	144	2.70359	1.77e-16
KIRP	female-bias	shelf	11	0.356428	1
KIRP	female-bias	island	92	0.825869	1
THCA	female-bias	opensea	62	0.697818	1
THCA	female-bias	shore	91	2.12897	2.12e-07
THCA	female-bias	shelf	8	0.354077	1
THCA	female-bias	island	68	0.883298	1
BLCA	female-bias	opensea	58	0.261913	1
BLCA	female-bias	shore	126	1.06093	0.671014
BLCA	female-bias	shelf	12	0.246197	1
BLCA	female-bias	island	311	3.04737	1.28e-33
HNSC	female-bias	opensea	41	0.311272	1
HNSC	female-bias	shore	116	2.02884	2.78e-08
HNSC	female-bias	shelf	10	0.347211	1
HNSC	female-bias	island	133	1.57769	0.000210096
LIHC	male-bias	1stExon	27	1.40784	0.174277
LIHC	male-bias	TSS200	60	1.428	0.0380771
LIHC	male-bias	TSS1500	77	1.48914	0.00970868
LIHC	male-bias	3'UTR	17	1.26193	0.473994
LIHC	male-bias	5'UTR	39	1.12615	0.529169
LIHC	male-bias	Body	68	0.424597	1
LIHC	male-bias	IGR	93	1.13574	0.374031
LUAD	male-bias	1stExon	13	0.909953	1
LUAD	male-bias	TSS200	28	0.842302	1
LUAD	male-bias	TSS1500	54	1.41246	0.0663282
LUAD	male-bias	3'UTR	20	2.1106	0.0122755
LUAD	male-bias	5'UTR	41	1.69889	0.011131
LUAD	male-bias	Body	69	0.653712	1
LUAD	male-bias	IGR	53	0.824126	1
LUSC	male-bias	1stExon	17	1.14979	0.607697
LUSC	male-bias	TSS200	35	1.01289	0.86075
LUSC	male-bias	TSS1500	62	1.60189	0.00657672
LUSC	male-bias	3'UTR	19	1.97027	0.0272251
LUSC	male-bias	5'UTR	37	1.44493	0.0995683
LUSC	male-bias	Body	66	0.595962	1
LUSC	male-bias	IGR	51	0.769515	1
COAD	male-bias	1stExon	35	1.30706	0.221601
COAD	male-bias	TSS200	56	0.892011	1
COAD	male-bias	TSS1500	118	1.61855	0.000129008
COAD	male-bias	3'UTR	43	2.25346	9.44e-05
COAD	male-bias	5'UTR	52	1.0385	0.743761
COAD	male-bias	Body	125	0.578007	1
COAD	male-bias	IGR	118	0.950079	1
KIRC	male-bias	1stExon	13	0.940637	1
KIRC	male-bias	TSS200	35	1.11235	0.580626
KIRC	male-bias	TSS1500	57	1.52744	0.017797
KIRC	male-bias	3'UTR	10	1.00368	0.907076
KIRC	male-bias	5'UTR	35	1.43023	0.113357
KIRC	male-bias	Body	69	0.662756	1
KIRC	male-bias	IGR	56	0.889205	1
KIRP	male-bias	1stExon	18	1.57561	0.152125
KIRP	male-bias	TSS200	22	0.792001	1
KIRP	male-bias	TSS1500	46	1.43241	0.0796552
KIRP	male-bias	3'UTR	23	2.91041	0.000232661
KIRP	male-bias	5'UTR	26	1.22866	0.438102
KIRP	male-bias	Body	60	0.68187	1
KIRP	male-bias	IGR	39	0.69399	1
THCA	male-bias	1stExon	12	1.25608	0.529169
THCA	male-bias	TSS200	24	1.08366	0.699273
THCA	male-bias	TSS1500	39	1.43918	0.105846
THCA	male-bias	3'UTR	8	1.11404	0.758343
THCA	male-bias	5'UTR	24	1.36789	0.244522
THCA	male-bias	Body	42	0.532494	1
THCA	male-bias	IGR	48	1.10921	0.564304
BLCA	male-bias	1stExon	4	0.66449	1
BLCA	male-bias	TSS200	14	1.02138	0.873659
BLCA	male-bias	TSS1500	15	0.872296	1
BLCA	male-bias	3'UTR	9	2.32355	0.0796552
BLCA	male-bias	5'UTR	21	2.18157	0.011131
BLCA	male-bias	Body	27	0.610769	1
BLCA	male-bias	IGR	25	0.985926	0.930784
HNSC	male-bias	1stExon	22	1.3832	0.244443
HNSC	male-bias	TSS200	34	0.895519	1
HNSC	male-bias	TSS1500	75	1.78643	0.000250679
HNSC	male-bias	3'UTR	18	1.61579	0.127525
HNSC	male-bias	5'UTR	37	1.27915	0.244522
HNSC	male-bias	Body	82	0.68293	1
HNSC	male-bias	IGR	52	0.679142	1
LIHC	female-bias	1stExon	23	1.71897	0.0544796
LIHC	female-bias	TSS200	34	1.10023	0.607697
LIHC	female-bias	TSS1500	59	1.64388	0.00562565
LIHC	female-bias	3'UTR	6	0.613746	1
LIHC	female-bias	5'UTR	42	1.81997	0.00412713
LIHC	female-bias	Body	56	0.511591	1
LIHC	female-bias	IGR	50	0.799098	1
LUAD	female-bias	1stExon	17	1.6013	0.152125
LUAD	female-bias	TSS200	32	1.32273	0.242491
LUAD	female-bias	TSS1500	35	1.14537	0.529169
LUAD	female-bias	3'UTR	5	0.650708	1
LUAD	female-bias	5'UTR	22	1.12478	0.608392
LUAD	female-bias	Body	45	0.527225	1
LUAD	female-bias	IGR	58	1.30116	0.160625
LUSC	female-bias	1stExon	20	1.60935	0.113357
LUSC	female-bias	TSS200	29	0.970112	0.965575
LUSC	female-bias	TSS1500	41	1.15664	0.486713
LUSC	female-bias	3'UTR	7	0.809904	1
LUSC	female-bias	5'UTR	43	2.05854	0.000543354
LUSC	female-bias	Body	45	0.444518	1
LUSC	female-bias	IGR	62	1.19375	0.314397
COAD	female-bias	1stExon	48	2.06425	0.000171668
COAD	female-bias	TSS200	61	1.10467	0.529169
COAD	female-bias	TSS1500	100	1.49698	0.00272837
COAD	female-bias	3'UTR	6	0.32455	1
COAD	female-bias	5'UTR	84	2.03269	1.91e-06
COAD	female-bias	Body	76	0.355514	1
COAD	female-bias	IGR	118	1.08713	0.489422
KIRC	female-bias	1stExon	21	0.921497	1
KIRC	female-bias	TSS200	33	0.59899	1
KIRC	female-bias	TSS1500	100	1.65547	0.000220851
KIRC	female-bias	3'UTR	20	1.22884	0.48171
KIRC	female-bias	5'UTR	46	1.10824	0.543777
KIRC	female-bias	Body	139	0.876013	1
KIRC	female-bias	IGR	94	0.910501	1
KIRP	female-bias	1stExon	24	1.54887	0.109902
KIRP	female-bias	TSS200	26	0.68179	1
KIRP	female-bias	TSS1500	83	2.07758	2.23e-06
KIRP	female-bias	3'UTR	7	0.602064	1
KIRP	female-bias	5'UTR	47	1.71171	0.00581418
KIRP	female-bias	Body	69	0.550052	1
KIRP	female-bias	IGR	61	0.826858	1
THCA	female-bias	1stExon	22	2.05902	0.0117392
THCA	female-bias	TSS200	45	1.91129	0.001717
THCA	female-bias	TSS1500	53	1.75611	0.0032592
THCA	female-bias	3'UTR	3	0.349214	1
THCA	female-bias	5'UTR	28	1.3736	0.216332
THCA	female-bias	Body	38	0.390908	1
THCA	female-bias	IGR	40	0.728546	1
BLCA	female-bias	1stExon	62	2.5742	5.11e-08
BLCA	female-bias	TSS200	96	1.72258	9.44e-05
BLCA	female-bias	TSS1500	85	1.17158	0.255807
BLCA	female-bias	3'UTR	5	0.272211	1
BLCA	female-bias	5'UTR	72	1.61701	0.0019853
BLCA	female-bias	Body	94	0.452743	1
BLCA	female-bias	IGR	93	0.797101	1
HNSC	female-bias	1stExon	27	1.85353	0.0149022
HNSC	female-bias	TSS200	33	0.931071	1
HNSC	female-bias	TSS1500	49	1.13866	0.486713
HNSC	female-bias	3'UTR	4	0.365979	1
HNSC	female-bias	5'UTR	49	1.91088	0.000796682
HNSC	female-bias	Body	61	0.505824	1
HNSC	female-bias	IGR	77	1.20912	0.238728
LIHC	male-bias	Insulator	1	0.525193	1
LIHC	male-bias	Promoter	44	0.527218	1
LIHC	male-bias	Distal enhancer	47	0.388866	1
LIHC	male-bias	Proximal enhancer	53	0.401515	1
LUAD	male-bias	Insulator	2	1.37606	1
LUAD	male-bias	Promoter	27	0.418542	1
LUAD	male-bias	Distal enhancer	40	0.451341	1
LUAD	male-bias	Proximal enhancer	33	0.322463	1
LUSC	male-bias	Insulator	1	0.671321	1
LUSC	male-bias	Promoter	37	0.561951	1
LUSC	male-bias	Proximal enhancer	43	0.411036	1
LUSC	male-bias	Distal enhancer	33	0.345714	1
COAD	male-bias	Promoter	46	0.363907	1
COAD	male-bias	Distal enhancer	66	0.35965	1
COAD	male-bias	Proximal enhancer	52	0.253395	1
COAD	male-bias	Insulator	0	0	1
KIRC	male-bias	Insulator	1	0.682883	0.999907
KIRC	male-bias	Promoter	49	0.867359	0.999907
KIRC	male-bias	Proximal enhancer	65	0.756944	0.999907
KIRC	male-bias	Distal enhancer	49	0.57575	0.999907
KIRP	male-bias	Promoter	29	0.558163	1
KIRP	male-bias	Proximal enhancer	38	0.466991	1
KIRP	male-bias	Distal enhancer	19	0.230163	1
KIRP	male-bias	Insulator	0	0	1
THCA	male-bias	Insulator	2	1.93	1
THCA	male-bias	Promoter	34	0.846755	1
THCA	male-bias	Proximal enhancer	38	0.589778	1
THCA	male-bias	Distal enhancer	19	0.282316	1
BLCA	male-bias	Insulator	1	1.60476	1
BLCA	male-bias	Distal enhancer	21	0.568932	1
BLCA	male-bias	Promoter	9	0.313198	1
BLCA	male-bias	Proximal enhancer	12	0.26246	1
HNSC	male-bias	Insulator	2	1.22	1
HNSC	male-bias	Promoter	29	0.398727	1
HNSC	male-bias	Proximal enhancer	30	0.252772	1
HNSC	male-bias	Distal enhancer	26	0.240495	1
LIHC	female-bias	Proximal enhancer	118	2.42703	1.41e-10
LIHC	female-bias	Promoter	76	1.82959	4.85e-05
LIHC	female-bias	Distal enhancer	46	0.629692	1
LIHC	female-bias	Insulator	0	0	1
LUAD	female-bias	Proximal enhancer	84	1.7521	0.000419701
LUAD	female-bias	Promoter	62	1.74385	0.000681642
LUAD	female-bias	Distal enhancer	51	0.907149	0.997706
LUAD	female-bias	Insulator	0	0	1
LUSC	female-bias	Proximal enhancer	100	1.88092	1.45e-05
LUSC	female-bias	Promoter	61	1.39671	0.0367689
LUSC	female-bias	Distal enhancer	65	1.07217	0.458129
LUSC	female-bias	Insulator	0	0	1
COAD	female-bias	Proximal enhancer	176	2.12293	4.63e-12
COAD	female-bias	Promoter	124	1.92543	1.77e-08
COAD	female-bias	Insulator	1	0.491312	0.999999
COAD	female-bias	Distal enhancer	67	0.553571	0.999999
KIRC	female-bias	Insulator	2	0.863724	0.991977
KIRC	female-bias	Proximal enhancer	110	0.828334	0.991977
KIRC	female-bias	Promoter	71	0.778383	0.991977
KIRC	female-bias	Distal enhancer	97	0.764767	0.991977
KIRP	female-bias	Proximal enhancer	140	2.36575	5.82e-12
KIRP	female-bias	Promoter	69	1.25102	0.12842
KIRP	female-bias	Distal enhancer	60	0.689774	1
KIRP	female-bias	Insulator	0	0	1
THCA	female-bias	Promoter	103	3.72946	2.11e-19
THCA	female-bias	Proximal enhancer	82	1.49756	0.00635137
THCA	female-bias	Insulator	1	0.85667	0.919494
THCA	female-bias	Distal enhancer	35	0.502032	0.999976
BLCA	female-bias	Promoter	196	3.59338	5.3e-34
BLCA	female-bias	Proximal enhancer	213	2.60768	8.6e-21
BLCA	female-bias	Distal enhancer	54	0.393572	1
BLCA	female-bias	Insulator	0	0	1
HNSC	female-bias	Proximal enhancer	120	2.08125	3.75e-08
HNSC	female-bias	Promoter	90	2.07072	1.73e-07
HNSC	female-bias	Distal enhancer	48	0.593104	1
HNSC	female-bias	Insulator	0	0	1
