# Supplementary material for: Attenuated sex-related DNA methylation differences in cancer highlight the magnitude bias mediating existing disparities
Source: Biol Sex Differ. 2024 Dec 23;15:106. doi: 10.1186/s13293-024-00682-4 (PMC11664931; doi:10.1186/s13293-024-00682-4)
Supplement: Supplementary file 6 — Supplementary material 6. [file 13293_2024_682_MOESM6_ESM.xlsx]

## Sheet: SupplementaryTable5
Cancer	ONTOLOGY	TERM	N	DE	P.DE	FDR
LIHC	BP	negative regulation of transcription by RNA polymerase II	885	32	2.89257e-07	0.0039944
LIHC	BP	negative regulation of transcription, DNA-templated	1190	38	6.21978e-07	0.0039944
LIHC	BP	negative regulation of nucleic acid-templated transcription	1192	38	6.55598e-07	0.0039944
LIHC	BP	negative regulation of RNA biosynthetic process	1194	38	7.00986e-07	0.0039944
LIHC	BP	negative regulation of RNA metabolic process	1299	38	5.60808e-06	0.0217552
LIHC	BP	negative regulation of cellular macromolecule biosynthetic process	1481	42	6.26243e-06	0.0217552
LIHC	BP	negative regulation of biosynthetic process	1587	44	7.26535e-06	0.0217552
LIHC	BP	negative regulation of macromolecule biosynthetic process	1492	42	7.63574e-06	0.0217552
LIHC	BP	negative regulation of cellular biosynthetic process	1555	42	2.25104e-05	0.0570088
LIHC	BP	negative regulation of nucleobase-containing compound metabolic process	1404	38	3.6379e-05	0.0829187
LIHC	BP	synapse organization	420	17	4.41788e-05	0.0915424
LIHC	BP	positive regulation of synapse assembly	58	6	0.000110454	0.209798
LIHC	BP	Rab protein signal transduction	20	4	0.00013811	0.242148
LIHC	BP	negative regulation of cellular process	4711	92	0.000292815	0.419858
LIHC	BP	regulation of synapse assembly	99	7	0.000293627	0.419858
LIHC	BP	cell junction organization	682	21	0.000294728	0.419858
LIHC	BP	presynapse assembly	48	5	0.000353552	0.474031
LIHC	BP	regulation of synapse organization	208	10	0.000409111	0.48794
LIHC	BP	corticotropin-releasing hormone secretion	3	2	0.000428149	0.48794
LIHC	BP	regulation of corticotropin-releasing hormone secretion	3	2	0.000428149	0.48794
LIHC	BP	presynapse organization	51	5	0.000506371	0.518033
LIHC	BP	regulation of synapse structure or activity	215	10	0.000523617	0.518033
LIHC	BP	synapse assembly	176	9	0.000529537	0.518033
LIHC	CC	cell junction	2048	45	0.000545466	0.518033
LIHC	CC	synapse	1310	32	0.000595266	0.542716
LIHC	BP	regulation of presynapse organization	32	4	0.000691119	0.583433
LIHC	BP	regulation of presynapse assembly	32	4	0.000691119	0.583433
LIHC	BP	axon development	463	15	0.00074731	0.608337
LIHC	BP	negative regulation of cellular metabolic process	2451	53	0.000903494	0.710115
LIHC	MF	NAD+ nucleosidase activity	28	4	0.000988	0.750649
LIHC	BP	regulation of cell junction assembly	202	9	0.00133135	0.925793
LIHC	BP	postsynapse organization	163	8	0.00133406	0.925793
LIHC	BP	maintenance of postsynaptic specialization structure	5	2	0.00134038	0.925793
LIHC	BP	sex determination	18	3	0.00143179	0.946379
LIHC	BP	negative regulation of granulocyte chemotaxis	4	2	0.00149474	0.946379
LIHC	BP	negative regulation of neutrophil chemotaxis	4	2	0.00149474	0.946379
LIHC	BP	negative regulation of nitrogen compound metabolic process	2294	49	0.00180862	1
LIHC	CC	endolysosome membrane	18	3	0.00185892	1
LIHC	BP	transcription by RNA polymerase II	2479	51	0.00225467	1
LIHC	BP	positive regulation of cell junction assembly	102	6	0.00234312	1
LIHC	MF	GABA-A receptor activity	19	3	0.00238999	1
LIHC	CC	GABA-A receptor complex	19	3	0.00238999	1
LIHC	BP	toll-like receptor 8 signaling pathway	5	2	0.0024179	1
LIHC	BP	positive regulation of nervous system development	269	10	0.00245434	1
LIHC	CC	neuron projection	1354	31	0.00246333	1
LIHC	BP	negative regulation of neutrophil migration	5	2	0.00257635	1
LIHC	CC	GABA receptor complex	20	3	0.00271593	1
LIHC	BP	negative regulation of biological process	5396	99	0.00288344	1
LIHC	BP	cell morphogenesis involved in differentiation	687	18	0.00291579	1
LIHC	BP	regulation of transcription by RNA polymerase II	2393	49	0.00300989	1
LIHC	BP	cell morphogenesis involved in neuron differentiation	539	15	0.00315825	1
LIHC	BP	transdifferentiation	8	2	0.00330171	1
LIHC	BP	cell junction assembly	412	13	0.00330209	1
LIHC	MF	GABA receptor activity	22	3	0.00339781	1
LIHC	MF	ribosomal protein S6 kinase activity	7	2	0.00339979	1
LIHC	CC	postsynaptic membrane	275	10	0.00351347	1
LIHC	MF	phospholipase binding	23	3	0.00367306	1
LIHC	CC	postsynapse	628	17	0.00390485	1
LIHC	BP	negative regulation of G0 to G1 transition	7	2	0.00398027	1
LIHC	BP	positive regulation of potassium ion transport	49	4	0.00417445	1
LIHC	CC	glutamatergic synapse	336	11	0.00427322	1
LIHC	BP	negative regulation of vasoconstriction	8	2	0.00434568	1
LIHC	CC	synaptic membrane	382	12	0.00487215	1
LIHC	BP	response to immobilization stress	25	3	0.00498413	1
LIHC	BP	regulation of atrial cardiac muscle cell membrane repolarization	8	2	0.00499183	1
LIHC	BP	negative regulation of metabolic process	3213	64	0.00517077	1
LIHC	BP	Ras protein signal transduction	328	11	0.00530132	1
LIHC	BP	axonogenesis	416	12	0.00568467	1
LIHC	BP	axis specification	86	5	0.00572324	1
LIHC	BP	regulation of postsynapse organization	88	5	0.00611503	1
LIHC	MF	hydrolase activity, hydrolyzing N-glycosyl compounds	50	4	0.00630151	1
LIHC	BP	presynaptic membrane assembly	9	2	0.00643039	1
LIHC	BP	small GTPase mediated signal transduction	488	14	0.00645507	1
LIHC	MF	histone deacetylase binding	119	6	0.00654335	1
LIHC	CC	endolysosome	27	3	0.00662121	1
LIHC	BP	response to interleukin-2	9	2	0.00688124	1
LIHC	MF	co-SMAD binding	11	2	0.00726894	1
LIHC	BP	negative regulation of macromolecule metabolic process	3012	60	0.00729676	1
LIHC	MF	siRNA binding	10	2	0.00746172	1
LIHC	BP	presynaptic membrane organization	10	2	0.00774262	1
LIHC	BP	Leydig cell differentiation	11	2	0.00796446	1
LIHC	BP	somite rostral/caudal axis specification	10	2	0.00861578	1
LIHC	BP	atrial cardiac muscle cell membrane repolarization	11	2	0.0089002	1
LIHC	BP	positive regulation of Arp2/3 complex-mediated actin nucleation	10	2	0.0090785	1
LIHC	BP	male sex determination	11	2	0.00914388	1
LIHC	BP	positive regulation of transmembrane transport	215	8	0.00974696	1
LIHC	BP	gonad development	211	8	0.00979105	1
LIHC	BP	positive regulation of dendrite morphogenesis	36	3	0.00984358	1
LIHC	BP	negative regulation of histone H3-K36 methylation	1	1	0.00988304	1
LIHC	CC	BCOR complex	1	1	0.00988304	1
LIHC	BP	positive regulation of sodium ion transport	35	3	0.00995843	1
LIHC	BP	neuron projection morphogenesis	608	15	0.0100133	1
LIHC	BP	regulation of neutrophil chemotaxis	30	3	0.0100876	1
LIHC	BP	embryonic pattern specification	66	4	0.0101557	1
LIHC	BP	Rho protein signal transduction	135	6	0.0102899	1
LIHC	MF	benzodiazepine receptor activity	11	2	0.0104027	1
LIHC	BP	somatic sex determination	1	1	0.0105151	1
LIHC	BP	male somatic sex determination	1	1	0.0105151	1
LIHC	BP	prostate induction	1	1	0.0105151	1
LIHC	BP	prostate field specification	1	1	0.0105151	1
LIHC	BP	activation of prostate induction by androgen receptor signaling pathway	1	1	0.0105151	1
LIHC	MF	POU domain binding	1	1	0.0105151	1
LIHC	BP	positive regulation of axon regeneration	11	2	0.0105355	1
LIHC	BP	embryonic olfactory bulb interneuron precursor migration	1	1	0.0106234	1
LIHC	BP	regulation of transcription, DNA-templated	3173	59	0.0108518	1
LIHC	CC	photoreceptor outer segment	88	5	0.0109017	1
LIHC	BP	regulation of nucleic acid-templated transcription	3174	59	0.0109374	1
LIHC	BP	thyroid hormone transport	11	2	0.0109457	1
LIHC	BP	regulation of respiratory gaseous exchange by nervous system process	13	2	0.0110485	1
LIHC	BP	development of primary sexual characteristics	217	8	0.011266	1
LIHC	BP	regulation of RNA biosynthetic process	3179	59	0.011348	1
LIHC	BP	negative regulation of establishment of T cell polarity	1	1	0.011407	1
LIHC	BP	regulation of protein localization to cell leading edge	1	1	0.011407	1
LIHC	BP	negative regulation of protein localization to cell leading edge	1	1	0.011407	1
LIHC	BP	negative regulation of Rho guanyl-nucleotide exchange factor activity	1	1	0.011407	1
LIHC	BP	neuron projection development	947	21	0.0114937	1
LIHC	BP	regulation of nervous system development	439	12	0.0115662	1
LIHC	MF	iduronate-2-sulfatase activity	1	1	0.0119081	1
LIHC	MF	apelin receptor binding	1	1	0.0119215	1
LIHC	BP	positive regulation of G protein-coupled receptor internalization	1	1	0.0119215	1
LIHC	MF	L-cysteine:2-oxoglutarate aminotransferase activity	1	1	0.011938	1
LIHC	CC	basal ectoplasmic specialization	1	1	0.0119498	1
LIHC	MF	DNA hairpin binding	1	1	0.011993	1
LIHC	CC	GABA-ergic synapse	68	4	0.0120006	1
LIHC	MF	1,4-alpha-glucan branching enzyme activity	1	1	0.0121091	1
LIHC	MF	1,4-alpha-glucan branching enzyme activity (using a glucosylated glycogenin as primer for glycogen synthesis)	1	1	0.0121091	1
LIHC	MF	death receptor agonist activity	1	1	0.0121384	1
LIHC	CC	septin collar	1	1	0.0121465	1
LIHC	BP	plasma membrane bounded cell projection morphogenesis	623	15	0.0123494	1
LIHC	BP	sex differentiation	266	9	0.0124276	1
LIHC	MF	alanine transmembrane transporter activity	12	2	0.0124931	1
LIHC	BP	positive regulation of neuron projection regeneration	12	2	0.0128158	1
LIHC	BP	asparagine transmembrane transport	1	1	0.0128222	1
LIHC	BP	regulation of G0 to G1 transition	12	2	0.0129772	1
LIHC	BP	male gonad development	138	6	0.0130935	1
LIHC	BP	cell projection morphogenesis	627	15	0.0131103	1
LIHC	BP	regulation of cellular process	10358	168	0.0132056	1
LIHC	BP	development of primary male sexual characteristics	139	6	0.0134238	1
LIHC	MF	GABA-gated chloride ion channel activity	13	2	0.0136122	1
LIHC	BP	cardiac muscle cell contraction	71	4	0.0137817	1
LIHC	BP	embryonic axis specification	38	3	0.0137901	1
LIHC	BP	AMPA selective glutamate receptor signaling pathway	1	1	0.0150116	1
LIHC	MF	peptidyl-dipeptidase inhibitor activity	1	1	0.0152961	1
LIHC	BP	G0 to G1 transition	13	2	0.0155792	1
LIHC	BP	neuron development	1088	23	0.0158668	1
LIHC	BP	L-ornithine import across plasma membrane	1	1	0.0159826	1
LIHC	BP	transcription, DNA-templated	3295	60	0.0160309	1
LIHC	CC	receptor complex	387	11	0.0160462	1
LIHC	BP	positive regulation of cell projection organization	347	10	0.0160946	1
LIHC	BP	regulation of respiratory system process	16	2	0.0162333	1
LIHC	BP	nucleic acid-templated transcription	3297	60	0.0162798	1
LIHC	MF	L-DOPA receptor activity	1	1	0.0164365	1
LIHC	MF	L-DOPA binding	1	1	0.0164365	1
LIHC	BP	negative regulation of histone H3-K27 trimethylation	1	1	0.0165702	1
LIHC	BP	cell part morphogenesis	645	15	0.0170261	1
LIHC	BP	cardiac muscle cell action potential	75	4	0.0171582	1
LIHC	BP	toll-like receptor 7 signaling pathway	12	2	0.0173454	1
LIHC	BP	G protein-coupled receptor catabolic process	1	1	0.0173741	1
LIHC	BP	positive regulation of cation transmembrane transport	149	6	0.0174601	1
LIHC	MF	N-acylglucosamine 2-epimerase activity	1	1	0.017743	1
LIHC	BP	positive regulation of sodium ion transmembrane transporter activity	16	2	0.0177777	1
LIHC	BP	regulation of dendritic spine morphogenesis	45	3	0.0178041	1
LIHC	BP	RNA biosynthetic process	3311	60	0.0178825	1
LIHC	BP	positive regulation of actin nucleation	15	2	0.0182466	1
LIHC	BP	alanine transport	15	2	0.0182611	1
LIHC	BP	protein targeting to Golgi apparatus	1	1	0.0183265	1
LIHC	BP	type III hypersensitivity	1	1	0.0186255	1
LIHC	BP	regulation of type III hypersensitivity	1	1	0.0186255	1
LIHC	BP	positive regulation of type III hypersensitivity	1	1	0.0186255	1
LIHC	BP	positive regulation of type I hypersensitivity	1	1	0.0186255	1
LIHC	BP	B cell cytokine production	1	1	0.0186255	1
LIHC	BP	regulation of B cell cytokine production	1	1	0.0186255	1
LIHC	BP	regulation of neutrophil migration	37	3	0.0186519	1
LIHC	MF	extracellular ligand-gated ion channel activity	72	4	0.018705	1
LIHC	MF	neurotransmitter receptor activity	105	5	0.0187991	1
LIHC	BP	plasma membrane bounded cell projection organization	1452	29	0.0188038	1
LIHC	BP	positive regulation of transmembrane receptor protein serine/threonine kinase signaling pathway	113	5	0.0189308	1
LIHC	BP	positive regulation of neuron projection development	160	6	0.0191477	1
LIHC	BP	maintenance of synapse structure	18	2	0.0192051	1
LIHC	MF	sulfuric ester hydrolase activity	16	2	0.0193408	1
LIHC	MF	inhibitory extracellular ligand-gated ion channel activity	15	2	0.0194796	1
LIHC	BP	Sertoli cell differentiation	17	2	0.0195349	1
LIHC	BP	positive regulation of potassium ion transmembrane transport	42	3	0.0195979	1
LIHC	BP	positive regulation of cell morphogenesis involved in differentiation	78	4	0.019656	1
LIHC	BP	regulation of heart contraction	200	7	0.0198201	1
LIHC	BP	response to interleukin-7	15	2	0.0199626	1
LIHC	BP	cellular response to interleukin-7	15	2	0.0199626	1
LIHC	BP	granulosa cell differentiation	1	1	0.0199667	1
LIHC	BP	granulosa cell development	1	1	0.0199667	1
LIHC	CC	6-phosphofructo-2-kinase/fructose-2,6-biphosphatase complex	1	1	0.0199789	1
LIHC	CC	sperm end piece	1	1	0.0199821	1
LIHC	CC	Cry-Per complex	1	1	0.0200881	1
LIHC	MF	hepatocyte growth factor binding	1	1	0.0200889	1
LIHC	BP	atrial septum secundum morphogenesis	2	1	0.0201192	1
LIHC	CC	costamere	18	2	0.0204251	1
LIHC	BP	lateral sprouting involved in mammary gland duct morphogenesis	2	1	0.0206035	1
LIHC	MF	GTPase regulator activity	456	12	0.0209001	1
LIHC	MF	nucleoside-triphosphatase regulator activity	456	12	0.0209001	1
LIHC	BP	regulation of blood circulation	250	8	0.020926	1
LIHC	BP	response to interleukin-11	2	1	0.0210286	1
LIHC	BP	positive regulation of dendritic spine morphogenesis	19	2	0.0212883	1
LIHC	BP	regulation of biological quality	3662	65	0.0216751	1
LIHC	BP	response to interleukin-9	2	1	0.0219969	1
LIHC	MF	basic amino acid transmembrane transporter activity	17	2	0.0220653	1
LIHC	MF	Fc-gamma receptor I complex binding	2	1	0.0224678	1
LIHC	BP	negative regulation of integrin biosynthetic process	2	1	0.0224928	1
LIHC	BP	vocalization behavior	19	2	0.0227495	1
LIHC	MF	structural constituent of postsynaptic specialization	2	1	0.0230692	1
LIHC	MF	structural constituent of postsynaptic density	2	1	0.0230692	1
LIHC	BP	cell-cell adhesion	867	20	0.0231297	1
LIHC	CC	synaptonemal complex	40	3	0.0232726	1
LIHC	CC	synaptonemal structure	40	3	0.0232726	1
LIHC	BP	atrial cardiac muscle cell action potential	19	2	0.0234813	1
LIHC	BP	atrial cardiac muscle cell to AV node cell signaling	19	2	0.0234813	1
LIHC	BP	atrial cardiac muscle cell to AV node cell communication	19	2	0.0234813	1
LIHC	MF	phosphatidylserine decarboxylase activity	2	1	0.0237097	1
LIHC	MF	phospholipase activator activity	16	2	0.0237159	1
LIHC	MF	chondroitin 6-sulfotransferase activity	2	1	0.0237493	1
LIHC	BP	negative regulation of vascular associated smooth muscle cell proliferation	40	3	0.023839	1
LIHC	MF	interleukin-1, type II, blocking receptor activity	2	1	0.0238525	1
LIHC	MF	choline-phosphate cytidylyltransferase activity	2	1	0.0238714	1
LIHC	MF	1-(4-iodo-2,5-dimethoxyphenyl)propan-2-amine binding	2	1	0.0238919	1
LIHC	BP	positive regulation of corticotropin-releasing hormone secretion	2	1	0.0239255	1
LIHC	BP	response to transition metal nanoparticle	2	1	0.0239924	1
LIHC	BP	glutamate catabolic process to aspartate	2	1	0.0240911	1
LIHC	BP	glutamate catabolic process to 2-oxoglutarate	2	1	0.0240911	1
LIHC	BP	trachea submucosa development	2	1	0.0241147	1
LIHC	BP	trachea gland development	2	1	0.0241147	1
LIHC	BP	negative regulation of cellular protein localization	116	5	0.0242525	1
LIHC	MF	small GTPase binding	257	8	0.0244336	1
LIHC	BP	actin filament-based movement	125	5	0.0246655	1
LIHC	BP	negative regulation of embryonic development	2	1	0.0255212	1
LIHC	BP	male sex differentiation	162	6	0.0259104	1
LIHC	CC	excitatory synapse	48	3	0.0259209	1
LIHC	MF	ligand-gated anion channel activity	18	2	0.0259887	1
LIHC	BP	regulation of cellular protein localization	520	13	0.0262833	1
LIHC	BP	positive regulation of ion transmembrane transport	165	6	0.0264878	1
LIHC	BP	latent virus replication	2	1	0.0266515	1
LIHC	BP	release from viral latency	2	1	0.0266515	1
LIHC	BP	regulation of neuron projection development	440	11	0.0266815	1
LIHC	MF	adenine transmembrane transporter activity	2	1	0.0271486	1
LIHC	BP	reproductive structure development	412	11	0.0272263	1
LIHC	BP	cell projection organization	1496	29	0.0272474	1
LIHC	BP	regulation of cell-substrate adhesion	218	7	0.0274218	1
LIHC	MF	SH3 domain binding	128	5	0.0276626	1
LIHC	MF	Rab GDP-dissociation inhibitor activity	2	1	0.0278475	1
LIHC	CC	parallel fiber	2	1	0.0278927	1
LIHC	BP	regulation of respiratory gaseous exchange	21	2	0.0281077	1
LIHC	MF	tyrosine binding	2	1	0.0281491	1
LIHC	BP	toll-like receptor signaling pathway	116	5	0.0282945	1
LIHC	BP	reproductive system development	415	11	0.0283461	1
LIHC	MF	NAD(P)+ nucleosidase activity	16	2	0.0284056	1
LIHC	MF	NAD+ nucleotidase, cyclic ADP-ribose generating	16	2	0.0284056	1
LIHC	CC	muscle tendon junction	2	1	0.0284445	1
LIHC	BP	apelin receptor signaling pathway	2	1	0.0285384	1
LIHC	BP	glycerol metabolic process	18	2	0.0288166	1
LIHC	BP	negative regulation of tooth mineralization	2	1	0.0291008	1
LIHC	BP	regulation of protein localization to membrane	173	6	0.0292057	1
LIHC	BP	regulation of cellular macromolecule biosynthetic process	3704	65	0.0292582	1
LIHC	BP	mannosamine metabolic process	2	1	0.0294423	1
LIHC	BP	N-acetylmannosamine metabolic process	2	1	0.0294423	1
LIHC	BP	N-acetylglucosamine metabolic process	19	2	0.0295331	1
LIHC	BP	Notch signaling pathway involved in somitogenesis	2	1	0.0295538	1
LIHC	BP	regulation of Notch signaling pathway involved in somitogenesis	2	1	0.0295538	1
LIHC	BP	negative regulation of Notch signaling pathway involved in somitogenesis	2	1	0.0295538	1
LIHC	BP	positive regulation of sodium ion transmembrane transport	21	2	0.029644	1
LIHC	BP	branching involved in ureteric bud morphogenesis	55	3	0.0298375	1
LIHC	BP	histone H3 deacetylation	20	2	0.0298671	1
LIHC	BP	regulation of sodium ion transport	89	4	0.0299428	1
LIHC	BP	peripheral B cell selection	2	1	0.0300455	1
LIHC	BP	B cell affinity maturation	2	1	0.0300455	1
LIHC	BP	regulation of primitive erythrocyte differentiation	2	1	0.0302489	1
LIHC	BP	eosinophil fate commitment	2	1	0.0302489	1
LIHC	BP	regulation of membrane repolarization during atrial cardiac muscle cell action potential	2	1	0.0303593	1
LIHC	MF	lipase activator activity	18	2	0.0303707	1
LIHC	BP	negative regulation of bone mineralization	19	2	0.0304448	1
LIHC	BP	cation transport	1150	24	0.0306651	1
LIHC	BP	regulation of stem cell proliferation	47	3	0.030702	1
LIHC	MF	interleukin-4 receptor activity	2	1	0.030738	1
LIHC	MF	GTPase activator activity	430	11	0.0311989	1
LIHC	MF	glycogenin glucosyltransferase activity	2	1	0.0312214	1
LIHC	MF	UDP-alpha-D-glucose:glucosyl-glycogenin alpha-D-glucosyltransferase activity	2	1	0.0312214	1
LIHC	BP	organ growth	174	6	0.0314618	1
LIHC	BP	basophil differentiation	2	1	0.0316596	1
LIHC	CC	BAT3 complex	3	1	0.0316872	1
LIHC	BP	cerebral cortex neuron differentiation	23	2	0.0317092	1
LIHC	MF	potassium channel regulator activity	51	3	0.0317966	1
LIHC	BP	ion transmembrane transport	1098	23	0.0318292	1
LIHC	CC	stereocilium shaft	2	1	0.0318659	1
LIHC	CC	chloride channel complex	49	3	0.0319736	1
LIHC	BP	septum secundum development	3	1	0.0320156	1
LIHC	BP	anterior/posterior axis specification	51	3	0.0320339	1
LIHC	BP	negative regulation of leukocyte migration	45	3	0.0320648	1
LIHC	BP	regulation of plasma membrane bounded cell projection organization	617	14	0.0321476	1
LIHC	BP	actin filament-based process	782	17	0.0323647	1
LIHC	CC	photoreceptor cell cilium	116	5	0.0324058	1
LIHC	CC	plasma membrane region	1234	25	0.0325106	1
LIHC	BP	striated muscle contraction	174	6	0.0327949	1
LIHC	BP	regulation of membrane potential	431	11	0.0329029	1
LIHC	BP	regulation of granulocyte chemotaxis	47	3	0.0329471	1
LIHC	BP	negative regulation of histone methylation	22	2	0.033061	1
LIHC	BP	tertiary branching involved in mammary gland duct morphogenesis	3	1	0.0332359	1
LIHC	BP	hypothalamus development	22	2	0.0332454	1
LIHC	BP	ion transport	1505	30	0.0333722	1
LIHC	BP	nucleobase-containing compound biosynthetic process	3682	64	0.0334114	1
LIHC	MF	histone deacetylase activity	21	2	0.033529	1
LIHC	BP	negative regulation of fibroblast growth factor receptor signaling pathway	22	2	0.0338729	1
LIHC	BP	complement activation, alternative pathway	17	2	0.0339034	1
LIHC	BP	regulation of macromolecule biosynthetic process	3733	65	0.0339664	1
LIHC	BP	heterocycle biosynthetic process	3749	65	0.0339826	1
LIHC	BP	L-lysine import across plasma membrane	2	1	0.0339885	1
LIHC	MF	stretch-activated, cation-selective, calcium channel activity	3	1	0.0340032	1
LIHC	MF	death receptor binding	21	2	0.0340318	1
LIHC	BP	regulation of cell morphogenesis involved in differentiation	93	4	0.0340627	1
LIHC	MF	ion channel regulator activity	134	5	0.0340943	1
LIHC	BP	circulatory system process	588	14	0.0341355	1
LIHC	BP	embryonic heart tube anterior/posterior pattern specification	3	1	0.0343946	1
LIHC	MF	bombesin receptor activity	2	1	0.0345644	1
LIHC	BP	bombesin receptor signaling pathway	2	1	0.0345644	1
LIHC	BP	negative regulation of leukocyte chemotaxis	19	2	0.0348241	1
LIHC	CC	stereocilium	53	3	0.0349998	1
LIHC	BP	positive regulation of ion transport	271	8	0.0350043	1
LIHC	BP	protein localization to cell leading edge	3	1	0.035061	1
LIHC	BP	cell adhesion	1450	29	0.0351646	1
LIHC	BP	negative regulation of neurotransmitter uptake	3	1	0.035194	1
LIHC	BP	negative regulation of serotonin uptake	3	1	0.035194	1
LIHC	BP	detection of visible light	48	3	0.0352289	1
LIHC	BP	regulation of T cell antigen processing and presentation	2	1	0.0353444	1
LIHC	BP	dendritic spine morphogenesis	59	3	0.0355803	1
LIHC	CC	photoreceptor disc membrane	20	2	0.0357061	1
LIHC	BP	negative regulation of transcription from RNA polymerase II promoter involved in smooth muscle cell differentiation	3	1	0.0357315	1
LIHC	BP	regulation of Arp2/3 complex-mediated actin nucleation	21	2	0.0359943	1
LIHC	BP	positive regulation of epithelial cell proliferation involved in prostate gland development	3	1	0.0360966	1
LIHC	BP	regulation of RNA metabolic process	3451	60	0.0361683	1
LIHC	MF	protein deacetylase activity	22	2	0.0362387	1
LIHC	BP	aromatic compound biosynthetic process	3760	65	0.0362743	1
LIHC	BP	maintenance of postsynaptic density structure	3	1	0.0363232	1
LIHC	BP	ionotropic glutamate receptor signaling pathway	25	2	0.0364038	1
LIHC	BP	alditol metabolic process	21	2	0.0365455	1
LIHC	BP	regulation of vascular associated smooth muscle cell migration	47	3	0.0366055	1
LIHC	CC	symmetric, GABA-ergic, inhibitory synapse	3	1	0.0367594	1
LIHC	BP	biological adhesion	1457	29	0.0370279	1
LIHC	BP	pigment metabolic process	83	4	0.0371495	1
LIHC	BP	regulation of type I hypersensitivity	2	1	0.0373229	1
LIHC	BP	type I hypersensitivity	2	1	0.0373229	1
LIHC	BP	branching morphogenesis of an epithelial tube	148	5	0.0374839	1
LIHC	BP	rhythmic synaptic transmission	3	1	0.0375033	1
LIHC	BP	actin-mediated cell contraction	95	4	0.0375309	1
LIHC	BP	ureteric bud morphogenesis	61	3	0.03776	1
LIHC	BP	vascular associated smooth muscle cell migration	48	3	0.0378966	1
LIHC	CC	endothelial microparticle	2	1	0.0379371	1
LIHC	BP	cardiac muscle contraction	135	5	0.0379498	1
LIHC	MF	interleukin-7 receptor activity	2	1	0.0379511	1
LIHC	BP	interleukin-7-mediated signaling pathway	2	1	0.0379511	1
LIHC	BP	negative regulation of hematopoietic stem cell proliferation	2	1	0.0379511	1
LIHC	BP	positive regulation of Schwann cell proliferation involved in axon regeneration	2	1	0.0379511	1
LIHC	BP	mesonephric duct morphogenesis	3	1	0.0381053	1
LIHC	BP	negative regulation of mesenchymal to epithelial transition involved in metanephros morphogenesis	3	1	0.0382849	1
LIHC	BP	negative regulation of potassium ion export across plasma membrane	3	1	0.0383937	1
LIHC	BP	mesenchymal cell proliferation involved in ureteric bud development	3	1	0.038401	1
LIHC	CC	integrin alphav-beta3 complex	3	1	0.0384638	1
LIHC	BP	negative regulation of smooth muscle cell differentiation	22	2	0.038647	1
LIHC	MF	monoamine oxidase activity	3	1	0.0386608	1
LIHC	CC	AMPA glutamate receptor complex	25	2	0.0386927	1
LIHC	MF	ionotropic glutamate receptor binding	26	2	0.0387151	1
LIHC	BP	regulation of cellular biosynthetic process	3886	67	0.0389674	1
LIHC	MF	long-chain-alcohol O-fatty-acyltransferase activity	2	1	0.0390792	1
LIHC	MF	arachidoyl-CoA:1-dodecanol O-acyltransferase activity	2	1	0.0390792	1
LIHC	BP	regulation of axonogenesis	153	5	0.0390917	1
LIHC	MF	Rho GDP-dissociation inhibitor binding	3	1	0.0391279	1
LIHC	BP	regulation of smooth muscle cell migration	87	4	0.0391298	1
LIHC	BP	mesonephric tubule morphogenesis	62	3	0.0392421	1
LIHC	BP	regulation of biosynthetic process	3954	68	0.0392487	1
LIHC	BP	asparagine transport	3	1	0.0393285	1
LIHC	MF	L-asparagine transmembrane transporter activity	3	1	0.0393285	1
LIHC	BP	regulation of cell projection organization	634	14	0.0394814	1
LIHC	MF	complement component C5a receptor activity	2	1	0.0395448	1
LIHC	BP	complement component C5a signaling pathway	2	1	0.0395448	1
LIHC	MF	channel regulator activity	140	5	0.0395636	1
LIHC	BP	protein localization to membrane	553	13	0.0395759	1
LIHC	BP	positive regulation of organ growth	55	3	0.0395811	1
LIHC	BP	blood vessel endothelial cell proliferation involved in sprouting angiogenesis	46	3	0.0397386	1
LIHC	MF	ATP:ADP antiporter activity	3	1	0.0397596	1
LIHC	BP	regulation of vascular associated smooth muscle cell proliferation	86	4	0.0402018	1
LIHC	BP	regulation of sodium ion transmembrane transporter activity	57	3	0.040309	1
LIHC	BP	regulation of potassium ion transmembrane transport	93	4	0.0403724	1
LIHC	BP	regulation of dendrite development	102	4	0.0409942	1
LIHC	BP	membrane repolarization during cardiac muscle cell action potential	24	2	0.04107	1
LIHC	BP	positive regulation of integrin biosynthetic process	3	1	0.0412654	1
LIHC	BP	amino acid transport	141	5	0.0413112	1
LIHC	CC	apical junction complex	141	5	0.0413183	1
LIHC	BP	negative regulation of vascular associated smooth muscle contraction	3	1	0.0414909	1
LIHC	BP	regulation of toll-like receptor 8 signaling pathway	3	1	0.0416766	1
LIHC	BP	positive regulation of toll-like receptor 8 signaling pathway	3	1	0.0416766	1
LIHC	BP	vascular associated smooth muscle cell proliferation	87	4	0.0417441	1
LIHC	CC	Myb complex	3	1	0.0417625	1
LIHC	BP	heart contraction	235	7	0.0418773	1
LIHC	BP	fumarate metabolic process	3	1	0.0419074	1
LIHC	MF	L-aspartate:2-oxoglutarate aminotransferase activity	3	1	0.0420289	1
LIHC	BP	aspartate biosynthetic process	3	1	0.0420289	1
LIHC	CC	neuron projection membrane	61	3	0.0420383	1
LIHC	MF	mu-type opioid receptor binding	4	1	0.0420505	1
LIHC	BP	detection of light stimulus involved in visual perception	21	2	0.0420517	1
LIHC	BP	detection of light stimulus involved in sensory perception	21	2	0.0420517	1
LIHC	MF	ligand-gated ion channel activity	141	5	0.0423002	1
LIHC	MF	ligand-gated channel activity	141	5	0.0423002	1
LIHC	BP	positive regulation of cellular component organization	1027	21	0.0423116	1
LIHC	BP	osmosensory signaling pathway	3	1	0.042437	1
LIHC	BP	negative regulation of chloride transport	3	1	0.0424599	1
LIHC	BP	amino acid transmembrane transport	97	4	0.0426492	1
LIHC	BP	establishment or maintenance of neuroblast polarity	3	1	0.0427525	1
LIHC	BP	establishment of neuroblast polarity	3	1	0.0427525	1
LIHC	MF	Gq/11-coupled serotonin receptor activity	3	1	0.0428258	1
LIHC	BP	phospholipase C-activating serotonin receptor signaling pathway	3	1	0.0428258	1
LIHC	BP	positive regulation of phosphatidylinositol biosynthetic process	3	1	0.0428258	1
LIHC	BP	regulation of G protein-coupled receptor internalization	3	1	0.0429715	1
LIHC	BP	male meiosis chromosome segregation	3	1	0.0430262	1
LIHC	BP	regulation of definitive erythrocyte differentiation	3	1	0.0431624	1
LIHC	MF	histone H3-tri/di/monomethyl-lysine-4 demethylase activity	3	1	0.0431645	1
LIHC	BP	histone H3-K4 demethylation, trimethyl-H3-K4-specific	3	1	0.0431645	1
LIHC	BP	positive regulation of interferon-alpha production	22	2	0.0433955	1
LIHC	BP	female pregnancy	180	6	0.0434377	1
LIHC	BP	positive regulation of cellular component biogenesis	509	12	0.0434451	1
LIHC	BP	articular cartilage development	3	1	0.0443021	1
LIHC	CC	9+0 non-motile cilium	127	5	0.0446422	1
LIHC	MF	GTPase binding	289	8	0.0446834	1
LIHC	BP	gamma-aminobutyric acid signaling pathway	25	2	0.044782	1
LIHC	BP	negative regulation of axonogenesis	64	3	0.0450167	1
LIHC	CC	extrinsic component of synaptic vesicle membrane	4	1	0.0451403	1
LIHC	MF	chromatin binding	557	13	0.0451517	1
LIHC	BP	filopodium assembly	61	3	0.0451743	1
LIHC	BP	regulation of postsynaptic membrane neurotransmitter receptor levels	62	3	0.0451967	1
LIHC	BP	eye pigment biosynthetic process	3	1	0.0452624	1
LIHC	BP	eye pigment metabolic process	3	1	0.0452624	1
LIHC	BP	pigment metabolic process involved in developmental pigmentation	3	1	0.0452624	1
LIHC	MF	mechanosensitive cation channel activity	4	1	0.04555	1
LIHC	BP	renal sodium ion absorption	4	1	0.0456349	1
LIHC	MF	hydrolase activity, acting on glycosyl bonds	132	5	0.0456467	1
LIHC	CC	CLOCK-BMAL transcription complex	3	1	0.045833	1
LIHC	MF	ferrous iron binding	25	2	0.0464416	1
LIHC	MF	interleukin-15 receptor activity	3	1	0.0465548	1
LIHC	BP	regulation of serotonin uptake	4	1	0.0467152	1
LIHC	BP	globus pallidus development	4	1	0.0467395	1
LIHC	MF	protein domain specific binding	691	15	0.046746	1
LIHC	BP	regulation of histone H3-K27 trimethylation	3	1	0.0472545	1
LIHC	BP	cell morphogenesis	975	19	0.0472639	1
LIHC	MF	P-type calcium transporter activity involved in regulation of presynaptic cytosolic calcium ion concentration	3	1	0.0474176	1
LIHC	BP	protein kinase C-activating G protein-coupled receptor signaling pathway	27	2	0.0476111	1
LIHC	BP	positive regulation of DNA methylation	4	1	0.0476229	1
LIHC	CC	syntrophin complex	4	1	0.0476434	1
LIHC	BP	L-alanine transmembrane transport	4	1	0.0476482	1
LIHC	BP	cell proliferation involved in mesonephros development	4	1	0.0480272	1
LIHC	BP	negative regulation of blood vessel endothelial cell proliferation involved in sprouting angiogenesis	20	2	0.0480339	1
LIHC	BP	regulation of cell adhesion	725	16	0.0484353	1
LIHC	BP	positive regulation of mitophagy	4	1	0.0486443	1
LIHC	CC	stereocilium bundle	60	3	0.048834	1
LIHC	BP	multicellular organismal process	7120	116	0.0488988	1
LIHC	BP	regulation of cellular component biogenesis	927	19	0.0490581	1
LIHC	BP	meiotic gene conversion	3	1	0.0490967	1
LIHC	BP	negative regulation of TRAIL-activated apoptotic signaling pathway	3	1	0.0494305	1
LIHC	BP	positive regulation of Schwann cell proliferation	3	1	0.0494665	1
LIHC	BP	heart process	245	7	0.049548	1
LIHC	BP	blood circulation	503	12	0.0495883	1
LIHC	BP	membrane repolarization during action potential	27	2	0.0496328	1
LIHC	BP	Schwann cell proliferation involved in axon regeneration	3	1	0.0496449	1
LIHC	BP	regulation of Schwann cell proliferation involved in axon regeneration	3	1	0.0496449	1
LIHC	BP	negative regulation of mesoderm development	3	1	0.0496927	1
LIHC	BP	anion transmembrane transport	241	7	0.0497356	1
LIHC	BP	regulation of dendrite morphogenesis	66	3	0.0497925	1
LIHC	BP	formation of radial glial scaffolds	4	1	0.0499302	1
LIHC	BP	regulation of cardiac muscle cell membrane repolarization	27	2	0.0499894	1
LUAD	BP	synapse organization	421	17	1.29037e-06	0.0198532
LUAD	BP	cell junction organization	683	22	1.74158e-06	0.0198532
LUAD	BP	axon development	464	16	1.01686e-05	0.0772779
LUAD	BP	axonogenesis	417	14	4.23057e-05	0.194378
LUAD	BP	negative regulation of transcription by RNA polymerase II	885	23	4.26286e-05	0.194378
LUAD	BP	negative regulation of RNA biosynthetic process	1195	28	5.16096e-05	0.196108
LUAD	BP	cell junction assembly	413	14	8.23873e-05	0.219137
LUAD	BP	regulation of axonogenesis	153	8	8.77503e-05	0.219137
LUAD	BP	negative regulation of RNA metabolic process	1300	29	9.55244e-05	0.219137
LUAD	BP	positive regulation of transmembrane transport	215	10	0.000112791	0.219137
LUAD	BP	negative regulation of transcription, DNA-templated	1191	27	0.000119688	0.219137
LUAD	BP	negative regulation of nucleic acid-templated transcription	1193	27	0.000124419	0.219137
LUAD	BP	cell morphogenesis involved in differentiation	688	18	0.000124952	0.219137
LUAD	BP	cell morphogenesis involved in neuron differentiation	540	15	0.000201264	0.267363
LUAD	BP	regulation of cell junction assembly	203	9	0.000204015	0.267363
LUAD	BP	positive regulation of cation transmembrane transport	149	8	0.000221497	0.267363
LUAD	BP	regulation of synapse organization	209	9	0.000255551	0.267363
LUAD	BP	regulation of proline transport	2	2	0.000257993	0.267363
LUAD	BP	regulation of proline import across plasma membrane	2	2	0.000257993	0.267363
LUAD	BP	positive regulation of proline import across plasma membrane	2	2	0.000257993	0.267363
LUAD	BP	regulation of L-proline import across plasma membrane	2	2	0.000257993	0.267363
LUAD	BP	positive regulation of L-proline import across plasma membrane	2	2	0.000257993	0.267363
LUAD	BP	regulation of synapse structure or activity	216	9	0.000322732	0.31052
LUAD	MF	monoamine oxidase activity	3	2	0.000326878	0.31052
LUAD	BP	regulation of postsynaptic membrane neurotransmitter receptor levels	62	5	0.0003819	0.337481
LUAD	BP	negative regulation of nucleobase-containing compound metabolic process	1405	29	0.000401681	0.337481
LUAD	BP	synapse assembly	177	8	0.000423857	0.337481
LUAD	BP	negative regulation of biosynthetic process	1589	32	0.000425604	0.337481
LUAD	BP	positive regulation of ion transmembrane transport	165	8	0.00042927	0.337481
LUAD	BP	regulation of synapse assembly	100	6	0.000479063	0.35282
LUAD	BP	negative regulation of GTPase activity	35	4	0.000479733	0.35282
LUAD	BP	cell part morphogenesis	646	16	0.000520606	0.370916
LUAD	CC	glutamatergic synapse	336	11	0.000544502	0.375279
LUAD	BP	negative regulation of cellular macromolecule biosynthetic process	1483	30	0.000559651	0.375279
LUAD	BP	negative regulation of cellular biosynthetic process	1557	31	0.000632315	0.405995
LUAD	BP	negative regulation of macromolecule biosynthetic process	1494	30	0.000641072	0.405995
LUAD	CC	Cul4-RING E3 ubiquitin ligase complex	34	4	0.000710112	0.437563
LUAD	BP	neuron projection morphogenesis	609	15	0.000770534	0.4623
LUAD	BP	maintenance of postsynaptic specialization structure	5	2	0.000834198	0.487663
LUAD	BP	regulation of biological quality	3668	59	0.0009052	0.507964
LUAD	BP	L-proline import across plasma membrane	4	2	0.000971819	0.507964
LUAD	BP	L-proline transmembrane transport	4	2	0.000971819	0.507964
LUAD	BP	proline import across plasma membrane	4	2	0.000971819	0.507964
LUAD	BP	plasma membrane bounded cell projection morphogenesis	624	15	0.000988433	0.507964
LUAD	BP	nervous system development	2371	40	0.00100261	0.507964
LUAD	CC	cell junction	2049	36	0.0010257	0.508367
LUAD	BP	cell projection morphogenesis	628	15	0.00106664	0.508894
LUAD	CC	actin filament	113	6	0.00107327	0.508894
LUAD	MF	GABA-A receptor activity	19	3	0.00111604	0.508894
LUAD	CC	GABA-A receptor complex	19	3	0.00111604	0.508894
LUAD	BP	postsynapse organization	163	7	0.00118276	0.52874
LUAD	BP	neuron projection development	949	20	0.00125349	0.546444
LUAD	CC	GABA receptor complex	20	3	0.0012703	0.546444
LUAD	BP	regulation of cation transmembrane transport	350	11	0.00133606	0.559358
LUAD	BP	presynapse assembly	49	4	0.00134939	0.559358
LUAD	BP	positive regulation of nervous system development	270	9	0.00137867	0.561292
LUAD	BP	regulation of nervous system development	440	12	0.00140453	0.561788
LUAD	BP	neuron development	1090	22	0.00143448	0.563874
LUAD	BP	regulation of developmental growth	324	10	0.00157899	0.603723
LUAD	MF	GABA receptor activity	22	3	0.00158881	0.603723
LUAD	MF	oxidoreductase activity, acting on the CH-NH2 group of donors	20	3	0.00172244	0.643769
LUAD	CC	AMPA glutamate receptor complex	25	3	0.00178584	0.645718
LUAD	BP	presynapse organization	52	4	0.00180484	0.645718
LUAD	CC	postsynapse	628	15	0.00181262	0.645718
LUAD	CC	synapse	1311	25	0.0019809	0.69481
LUAD	BP	negative regulation of cellular metabolic process	2457	42	0.00224505	0.768192
LUAD	CC	chloride channel complex	50	4	0.00225751	0.768192
LUAD	BP	cellular component morphogenesis	738	16	0.00236242	0.792072
LUAD	BP	morphogenesis of a polarized epithelium	94	5	0.00240847	0.795807
LUAD	MF	protein domain specific binding	691	16	0.00247296	0.805227
LUAD	MF	primary amine oxidase activity	6	2	0.00254012	0.805227
LUAD	CC	receptor complex	387	11	0.00255445	0.805227
LUAD	BP	dopamine catabolic process	7	2	0.00257825	0.805227
LUAD	BP	central nervous system development	1001	20	0.00267427	0.823928
LUAD	BP	positive regulation of ion transport	270	9	0.00275334	0.83698
LUAD	BP	brain development	730	16	0.0028013	0.837236
LUAD	BP	regulation of neurotransmitter receptor localization to postsynaptic specialization membrane	9	2	0.0028603	0.837236
LUAD	BP	cognition	292	9	0.00286436	0.837236
LUAD	BP	positive regulation of synapse assembly	59	4	0.00305213	0.88083
LUAD	BP	catechol-containing compound catabolic process	8	2	0.00325253	0.915486
LUAD	BP	catecholamine catabolic process	8	2	0.00325253	0.915486
LUAD	BP	regulation of extent of cell growth	109	5	0.00334027	0.928718
LUAD	BP	negative regulation of nitrogen compound metabolic process	2299	39	0.00362344	0.983714
LUAD	BP	cell morphogenesis	976	19	0.00362437	0.983714
LUAD	BP	positive regulation of cell junction assembly	103	5	0.00411309	1
LUAD	BP	regulation of presynapse organization	33	3	0.00412382	1
LUAD	BP	regulation of presynapse assembly	33	3	0.00412382	1
LUAD	BP	anion transmembrane transport	241	8	0.00429429	1
LUAD	BP	response to interleukin-2	9	2	0.00439493	1
LUAD	BP	L-alpha-amino acid transmembrane transport	64	4	0.00442243	1
LUAD	BP	neural nucleus development	62	4	0.00455994	1
LUAD	BP	Leydig cell differentiation	11	2	0.00467547	1
LUAD	BP	cellular biogenic amine metabolic process	97	5	0.00470971	1
LUAD	BP	head development	772	16	0.00485037	1
LUAD	BP	positive regulation of dendrite morphogenesis	36	3	0.00490815	1
LUAD	BP	chloride transmembrane transport	66	4	0.00506706	1
LUAD	BP	axon extension	120	5	0.00527555	1
LUAD	BP	proline transport	10	2	0.0052829	1
LUAD	BP	male sex determination	11	2	0.00532583	1
LUAD	BP	establishment of planar polarity	72	4	0.00546049	1
LUAD	BP	establishment of tissue polarity	72	4	0.00546049	1
LUAD	BP	positive regulation of axonogenesis	78	4	0.00555052	1
LUAD	BP	neurotransmitter catabolic process	11	2	0.00557092	1
LUAD	CC	ionotropic glutamate receptor complex	39	3	0.00565727	1
LUAD	BP	L-amino acid transport	68	4	0.00590513	1
LUAD	BP	proline transmembrane transport	10	2	0.00593613	1
LUAD	MF	WW domain binding	32	3	0.0059458	1
LUAD	BP	phenol-containing compound catabolic process	11	2	0.00596086	1
LUAD	CC	ubiquitin ligase complex	299	9	0.00615756	1
LUAD	BP	positive regulation of anion transmembrane transport	11	2	0.0065305	1
LUAD	BP	positive regulation of dendritic spine development	40	3	0.00654169	1
LUAD	MF	benzodiazepine receptor activity	11	2	0.00655099	1
LUAD	BP	nervous system process involved in regulation of systemic arterial blood pressure	12	2	0.00661626	1
LUAD	BP	negative regulation of histone H3-K36 methylation	1	1	0.00672723	1
LUAD	CC	BCOR complex	1	1	0.00672723	1
LUAD	BP	regulation of respiratory gaseous exchange by nervous system process	13	2	0.00673386	1
LUAD	BP	developmental growth involved in morphogenesis	231	7	0.00676183	1
LUAD	BP	positive regulation of axon extension	42	3	0.00685648	1
LUAD	CC	neurotransmitter receptor complex	41	3	0.00690791	1
LUAD	MF	neurotransmitter receptor activity	105	5	0.00708185	1
LUAD	BP	negative regulation of cellular process	4721	68	0.00734373	1
LUAD	BP	somatic sex determination	1	1	0.00742018	1
LUAD	BP	male somatic sex determination	1	1	0.00742018	1
LUAD	BP	prostate induction	1	1	0.00742018	1
LUAD	BP	prostate field specification	1	1	0.00742018	1
LUAD	BP	activation of prostate induction by androgen receptor signaling pathway	1	1	0.00742018	1
LUAD	MF	POU domain binding	1	1	0.00742018	1
LUAD	BP	embryonic olfactory bulb interneuron precursor migration	1	1	0.00749314	1
LUAD	CC	postsynaptic density, intracellular component	15	2	0.00750284	1
LUAD	BP	cell migration involved in gastrulation	14	2	0.00759406	1
LUAD	BP	cellular amine metabolic process	109	5	0.00765792	1
LUAD	BP	developmental cell growth	231	7	0.00784858	1
LUAD	BP	ion transmembrane transport	1100	21	0.00809719	1
LUAD	MF	extracellular ligand-gated ion channel activity	72	4	0.00819539	1
LUAD	BP	neuron differentiation	1346	23	0.00831816	1
LUAD	BP	regulation of transmembrane transport	574	13	0.00842977	1
LUAD	BP	regulation of cell size	180	6	0.0084351	1
LUAD	MF	GABA-gated chloride ion channel activity	13	2	0.00847776	1
LUAD	BP	positive regulation of cell morphogenesis involved in differentiation	78	4	0.00847881	1
LUAD	BP	regulation of transmembrane transporter activity	271	8	0.00861082	1
LUAD	CC	growth cone	177	6	0.00876816	1
LUAD	BP	regulation of neurogenesis	361	9	0.00896415	1
LUAD	MF	death receptor agonist activity	1	1	0.00912255	1
LUAD	BP	protein palmitoleylation	1	1	0.009159	1
LUAD	BP	regulation of protein localization to membrane	173	6	0.00917592	1
LUAD	BP	regulation of protein localization to cell periphery	124	5	0.00937424	1
LUAD	BP	regulation of amino acid import across plasma membrane	13	2	0.00938543	1
LUAD	BP	regulation of amino acid transmembrane transport	13	2	0.00938543	1
LUAD	MF	quercetin 2,3-dioxygenase activity	1	1	0.00948184	1
LUAD	MF	chloride channel activity	74	4	0.00951502	1
LUAD	MF	DNA hairpin binding	1	1	0.00953948	1
LUAD	CC	basal ectoplasmic specialization	1	1	0.0095453	1
LUAD	BP	protein localization to postsynaptic specialization membrane	16	2	0.00955081	1
LUAD	BP	neurotransmitter receptor localization to postsynaptic specialization membrane	16	2	0.00955081	1
LUAD	BP	amine metabolic process	114	5	0.00967393	1
LUAD	BP	regulation of respiratory system process	16	2	0.00982305	1
LUAD	BP	negative regulation of cell projection organization	182	6	0.00984929	1
LUAD	CC	distal axon	294	8	0.0101093	1
LUAD	CC	site of polarized growth	183	6	0.0102743	1
LUAD	BP	amino acid import across plasma membrane	44	3	0.0106242	1
LUAD	MF	spermine synthase activity	1	1	0.0107624	1
LUAD	BP	regulation of anatomical structure morphogenesis	952	18	0.0108016	1
LUAD	CC	dendrite	628	13	0.0108473	1
LUAD	BP	AMPA selective glutamate receptor signaling pathway	1	1	0.0110309	1
LUAD	CC	dendritic tree	630	13	0.0111892	1
LUAD	CC	interleukin-13 receptor complex	1	1	0.0112183	1
LUAD	MF	peptidyl-dipeptidase inhibitor activity	1	1	0.0113444	1
LUAD	BP	developmental growth	616	13	0.011378	1
LUAD	BP	axis specification	86	4	0.0114084	1
LUAD	BP	maintenance of synapse structure	18	2	0.0115312	1
LUAD	BP	regulation of axon extension	95	4	0.0115648	1
LUAD	BP	regulation of neuron projection development	440	10	0.0115958	1
LUAD	BP	multicellular organismal process	7157	97	0.0119702	1
LUAD	BP	L-ornithine import across plasma membrane	1	1	0.0120537	1
LUAD	MF	inhibitory extracellular ligand-gated ion channel activity	15	2	0.0121151	1
LUAD	BP	vocalization behavior	19	2	0.0123306	1
LUAD	BP	substantia nigra development	42	3	0.0123881	1
LUAD	BP	Sertoli cell differentiation	17	2	0.0124226	1
LUAD	CC	synaptonemal complex	40	3	0.0124533	1
LUAD	CC	synaptonemal structure	40	3	0.0124533	1
LUAD	BP	sex determination	18	2	0.0126091	1
LUAD	BP	social behavior	51	3	0.0126316	1
LUAD	CC	somatodendritic compartment	846	16	0.0126459	1
LUAD	BP	positive regulation of dendritic spine morphogenesis	19	2	0.0127973	1
LUAD	BP	Wnt signaling pathway, planar cell polarity pathway	52	3	0.0128677	1
LUAD	BP	regulation of ion transmembrane transport	480	11	0.0129952	1
LUAD	BP	regulation of receptor localization to synapse	18	2	0.013037	1
LUAD	CC	postsynaptic specialization, intracellular component	19	2	0.0136103	1
LUAD	BP	negative regulation of histone H3-K27 trimethylation	1	1	0.0136172	1
LUAD	MF	oxidoreductase activity, acting on the CH-NH2 group of donors, oxygen as acceptor	16	2	0.0139183	1
LUAD	MF	transcription factor binding	572	12	0.0141311	1
LUAD	BP	regulation of ion transport	679	14	0.0142584	1
LUAD	BP	negative regulation of growth	247	7	0.0142598	1
LUAD	MF	gluconolactonase activity	1	1	0.0143156	1
LUAD	BP	negative regulation of bone development	1	1	0.0143156	1
LUAD	BP	negative regulation of calcium-dependent ATPase activity	1	1	0.0143156	1
LUAD	BP	regulation of dUTP diphosphatase activity	1	1	0.0143156	1
LUAD	BP	positive regulation of dUTP diphosphatase activity	1	1	0.0143156	1
LUAD	BP	negative regulation of aminoacyl-tRNA ligase activity	1	1	0.0143156	1
LUAD	BP	regulation of leucine-tRNA ligase activity	1	1	0.0143156	1
LUAD	BP	negative regulation of leucine-tRNA ligase activity	1	1	0.0143156	1
LUAD	BP	lateral sprouting involved in mammary gland duct morphogenesis	2	1	0.0143647	1
LUAD	BP	biological process involved in intraspecies interaction between organisms	53	3	0.0144045	1
LUAD	MF	anion channel activity	84	4	0.0144322	1
LUAD	MF	N-acylglucosamine 2-epimerase activity	1	1	0.0145691	1
LUAD	MF	trimethyllysine dioxygenase activity	1	1	0.0146565	1
LUAD	BP	plasma membrane bounded cell projection organization	1455	24	0.0147956	1
LUAD	BP	positive regulation of potassium ion transport	49	3	0.0148199	1
LUAD	MF	holocytochrome-c synthase activity	1	1	0.0148811	1
LUAD	BP	protein-heme linkage	1	1	0.0148811	1
LUAD	BP	protein-tetrapyrrole linkage	1	1	0.0148811	1
LUAD	BP	cytochrome c-heme linkage	1	1	0.0148811	1
LUAD	BP	regulation of cell morphogenesis involved in differentiation	93	4	0.0149035	1
LUAD	BP	neuron migration	154	5	0.0149432	1
LUAD	BP	response to interleukin-11	2	1	0.0149772	1
LUAD	BP	inorganic anion transmembrane transport	91	4	0.0149947	1
LUAD	CC	apical junction complex	141	5	0.0152338	1
LUAD	BP	regulation of blood pressure	181	6	0.0153774	1
LUAD	MF	glycerophosphoinositol inositolphosphodiesterase activity	1	1	0.0158464	1
LUAD	MF	ligand-gated anion channel activity	18	2	0.0161051	1
LUAD	MF	hepatocyte growth factor binding	1	1	0.0161283	1
LUAD	BP	amino acid import	52	3	0.016137	1
LUAD	MF	palmitoleoyltransferase activity	2	1	0.0161421	1
LUAD	BP	response to interleukin-9	2	1	0.0162016	1
LUAD	BP	regulation of protein localization to synapse	21	2	0.0162155	1
LUAD	CC	sperm end piece	1	1	0.0162433	1
LUAD	CC	6-phosphofructo-2-kinase/fructose-2,6-biphosphatase complex	1	1	0.0162764	1
LUAD	CC	Cry-Per complex	1	1	0.0162772	1
LUAD	MF	ligand-gated ion channel activity	141	5	0.0163299	1
LUAD	MF	ligand-gated channel activity	141	5	0.0163299	1
LUAD	CC	synaptic membrane	382	9	0.016364	1
LUAD	BP	regulation of establishment of planar polarity	56	3	0.0164446	1
LUAD	BP	regulation of transporter activity	300	8	0.0167131	1
LUAD	BP	catecholamine metabolic process	51	3	0.0167357	1
LUAD	BP	catechol-containing compound metabolic process	51	3	0.0167357	1
LUAD	MF	Fc-gamma receptor I complex binding	2	1	0.0167464	1
LUAD	BP	negative regulation of integrin biosynthetic process	2	1	0.0167598	1
LUAD	BP	regulation of dendritic spine development	58	3	0.0168663	1
LUAD	BP	regulation of respiratory gaseous exchange	21	2	0.0172392	1
LUAD	BP	regulation of growth	644	13	0.0174149	1
LUAD	MF	glucose-6-phosphate dehydrogenase activity	2	1	0.0174208	1
LUAD	BP	cell-cell signaling	1606	26	0.0175915	1
LUAD	MF	structural constituent of postsynaptic specialization	2	1	0.0176954	1
LUAD	MF	structural constituent of postsynaptic density	2	1	0.0176954	1
LUAD	BP	receptor localization to synapse	57	3	0.0178351	1
LUAD	MF	CTP synthase activity	2	1	0.0180728	1
LUAD	BP	'de novo' CTP biosynthetic process	2	1	0.0180728	1
LUAD	BP	trachea submucosa development	2	1	0.0180794	1
LUAD	BP	trachea gland development	2	1	0.0180794	1
LUAD	MF	choline-phosphate cytidylyltransferase activity	2	1	0.0180963	1
LUAD	MF	interleukin-1, type II, blocking receptor activity	2	1	0.0181253	1
LUAD	BP	axon guidance	227	6	0.0181574	1
LUAD	MF	1-(4-iodo-2,5-dimethoxyphenyl)propan-2-amine binding	2	1	0.0182295	1
LUAD	BP	positive regulation of amino acid transport	19	2	0.0184488	1
LUAD	BP	neuron projection guidance	228	6	0.0184602	1
LUAD	BP	latent virus replication	2	1	0.0185798	1
LUAD	BP	release from viral latency	2	1	0.0185798	1
LUAD	BP	pentose biosynthetic process	2	1	0.0186153	1
LUAD	MF	chondroitin 6-sulfotransferase activity	2	1	0.0186185	1
LUAD	BP	serotonin transport	20	2	0.0186192	1
LUAD	BP	protein glutathionylation	2	1	0.01863	1
LUAD	BP	regulation of protein glutathionylation	2	1	0.01863	1
LUAD	BP	negative regulation of protein glutathionylation	2	1	0.01863	1
LUAD	BP	amino acid transmembrane transport	97	4	0.0187948	1
LUAD	BP	N-acetylglucosamine metabolic process	19	2	0.0188302	1
LUAD	CC	transferase complex	735	15	0.0188426	1
LUAD	BP	cerebral cortex neuron differentiation	23	2	0.0188517	1
LUAD	BP	regulation of systemic arterial blood pressure	93	4	0.0194107	1
LUAD	BP	negative regulation of histone methylation	22	2	0.0200299	1
LUAD	BP	spermine biosynthetic process	2	1	0.0200624	1
LUAD	BP	cell projection organization	1499	24	0.0208787	1
LUAD	BP	positive regulation of neurogenesis	223	6	0.0212283	1
LUAD	BP	negative regulation of axonogenesis	64	3	0.0214113	1
LUAD	BP	regulation of calcium-dependent ATPase activity	2	1	0.0216183	1
LUAD	CC	postsynaptic membrane	275	7	0.0217592	1
LUAD	BP	ionotropic glutamate receptor signaling pathway	25	2	0.0218364	1
LUAD	BP	glutamine metabolic process	21	2	0.0219017	1
LUAD	MF	death receptor binding	21	2	0.0219255	1
LUAD	BP	negative regulation of tooth mineralization	2	1	0.0220149	1
LUAD	MF	linear polyubiquitin binding	2	1	0.0224549	1
LUAD	BP	regulation of cellular protein localization	520	11	0.0226762	1
LUAD	BP	regulation of organ growth	104	4	0.0227934	1
LUAD	BP	negative regulation of ligase activity	2	1	0.0233338	1
LUAD	BP	regulation of membrane repolarization during atrial cardiac muscle cell action potential	2	1	0.0236162	1
LUAD	MF	activin receptor antagonist activity	2	1	0.023668	1
LUAD	BP	L-ascorbic acid biosynthetic process	2	1	0.0237476	1
LUAD	BP	lactone biosynthetic process	2	1	0.0237476	1
LUAD	MF	ionotropic glutamate receptor binding	26	2	0.0238465	1
LUAD	BP	mannosamine metabolic process	2	1	0.0239753	1
LUAD	BP	N-acetylmannosamine metabolic process	2	1	0.0239753	1
LUAD	CC	neuron projection	1356	22	0.0240823	1
LUAD	BP	negative regulation of developmental growth	111	4	0.0241107	1
LUAD	BP	neuron projection extension	171	5	0.0243844	1
LUAD	BP	tertiary branching involved in mammary gland duct morphogenesis	3	1	0.024585	1
LUAD	CC	muscle tendon junction	2	1	0.0246159	1
LUAD	BP	positive regulation of epithelial cell proliferation involved in prostate gland development	3	1	0.0247938	1
LUAD	CC	cytoophidium	3	1	0.0248649	1
LUAD	MF	peptidyl-dipeptidase activity	2	1	0.0249283	1
LUAD	BP	transcription by RNA polymerase II	2485	37	0.0250852	1
LUAD	MF	interleukin-4 receptor activity	2	1	0.0251008	1
LUAD	CC	ion channel complex	279	7	0.0251734	1
LUAD	BP	synaptic membrane adhesion	25	2	0.0252291	1
LUAD	MF	glycogenin glucosyltransferase activity	2	1	0.0253656	1
LUAD	MF	UDP-alpha-D-glucose:glucosyl-glycogenin alpha-D-glucosyltransferase activity	2	1	0.0253656	1
LUAD	MF	oleamide hydrolase activity	2	1	0.025677	1
LUAD	MF	anandamide amidohydrolase activity	2	1	0.025677	1
LUAD	BP	regulation of dendrite morphogenesis	66	3	0.0257731	1
LUAD	MF	bombesin receptor activity	2	1	0.0258907	1
LUAD	BP	bombesin receptor signaling pathway	2	1	0.0258907	1
LUAD	BP	establishment of cell polarity involved in ameboidal cell migration	3	1	0.0263007	1
LUAD	BP	generation of neurons	1496	23	0.0267102	1
LUAD	BP	negative regulation of biological process	5406	74	0.0267883	1
LUAD	CC	CERF complex	2	1	0.026837	1
LUAD	BP	L-lysine import across plasma membrane	2	1	0.026918	1
LUAD	MF	heparan sulfate 6-O-sulfotransferase activity	3	1	0.0270427	1
LUAD	BP	negative regulation of neurotransmitter uptake	3	1	0.0270707	1
LUAD	BP	negative regulation of serotonin uptake	3	1	0.0270707	1
LUAD	BP	negative regulation of mesenchymal to epithelial transition involved in metanephros morphogenesis	3	1	0.0271192	1
LUAD	BP	regulation of RNA metabolic process	3458	49	0.0272149	1
LUAD	BP	regulation of anion transmembrane transport	24	2	0.0272356	1
LUAD	MF	ubiquitin activating enzyme activity	3	1	0.0273414	1
LUAD	BP	regulation of cell development	495	10	0.0274863	1
LUAD	BP	negative regulation of transcription from RNA polymerase II promoter involved in smooth muscle cell differentiation	3	1	0.0275293	1
LUAD	BP	gamma-aminobutyric acid signaling pathway	25	2	0.027575	1
LUAD	BP	corticotropin-releasing hormone secretion	3	1	0.0275774	1
LUAD	BP	regulation of corticotropin-releasing hormone secretion	3	1	0.0275774	1
LUAD	CC	symmetric, GABA-ergic, inhibitory synapse	3	1	0.0279165	1
LUAD	MF	transmitter-gated ion channel activity	60	3	0.0280004	1
LUAD	MF	transmitter-gated channel activity	60	3	0.0280004	1
LUAD	BP	gonad development	211	6	0.0282366	1
LUAD	BP	positive regulation of cell development	296	7	0.0287975	1
LUAD	BP	phenol-containing compound metabolic process	107	4	0.0288641	1
LUAD	BP	developmental process	6111	80	0.0288851	1
LUAD	CC	cell-cell junction	485	10	0.0289407	1
LUAD	BP	rhythmic synaptic transmission	3	1	0.0289682	1
LUAD	BP	regulation of animal organ morphogenesis	124	4	0.0290899	1
LUAD	BP	peptide hormone processing	24	2	0.0292183	1
LUAD	BP	mesenchymal cell proliferation involved in ureteric bud development	3	1	0.029301	1
LUAD	BP	mesonephric duct morphogenesis	3	1	0.0293233	1
LUAD	CC	integrin alphav-beta3 complex	3	1	0.0294027	1
LUAD	CC	axonal growth cone	28	2	0.0294235	1
LUAD	BP	cation transmembrane transport	885	16	0.0294978	1
LUAD	CC	GABA-ergic synapse	68	3	0.0300146	1
LUAD	BP	maintenance of postsynaptic density structure	3	1	0.0300438	1
LUAD	BP	regulation of aminoacyl-tRNA ligase activity	2	1	0.0301175	1
LUAD	MF	mu-type opioid receptor binding	4	1	0.0302288	1
LUAD	BP	non-canonical Wnt signaling pathway	72	3	0.0302711	1
LUAD	CC	endothelial microparticle	2	1	0.0304205	1
LUAD	BP	growth	914	16	0.0306276	1
LUAD	BP	angiotensin-mediated drinking behavior	2	1	0.0307307	1
LUAD	BP	negative regulation of ion transport	156	5	0.0307405	1
LUAD	MF	Rho GDP-dissociation inhibitor binding	3	1	0.0307896	1
LUAD	MF	interleukin-7 receptor activity	2	1	0.0307994	1
LUAD	BP	interleukin-7-mediated signaling pathway	2	1	0.0307994	1
LUAD	MF	glutamate dehydrogenase (NAD+) activity	2	1	0.0310918	1
LUAD	MF	glutamate dehydrogenase [NAD(P)+] activity	2	1	0.0310918	1
LUAD	MF	glutamate dehydrogenase (NADP+) activity	2	1	0.0310918	1
LUAD	MF	oxidoreductase activity, acting on the CH-NH2 group of donors, NAD or NADP as acceptor	2	1	0.0310918	1
LUAD	BP	development of primary sexual characteristics	217	6	0.0311505	1
LUAD	CC	desmosome	24	2	0.031313	1
LUAD	MF	long-chain-alcohol O-fatty-acyltransferase activity	2	1	0.0314087	1
LUAD	MF	arachidoyl-CoA:1-dodecanol O-acyltransferase activity	2	1	0.0314087	1
LUAD	BP	pyrimidine ribonucleotide biosynthetic process	22	2	0.0315351	1
LUAD	BP	positive regulation of integrin biosynthetic process	3	1	0.0319634	1
LUAD	BP	chloride transport	109	4	0.0320745	1
LUAD	BP	system development	4653	62	0.032084	1
LUAD	BP	positive regulation of calcium ion transmembrane transport via high voltage-gated calcium channel	3	1	0.0324431	1
LUAD	BP	signaling receptor ligand precursor processing	25	2	0.0324842	1
LUAD	BP	male meiosis chromosome segregation	3	1	0.0326481	1
LUAD	BP	regulation of multicellular organismal development	1352	22	0.0328322	1
LUAD	BP	regulation of toll-like receptor 8 signaling pathway	3	1	0.0330239	1
LUAD	BP	positive regulation of toll-like receptor 8 signaling pathway	3	1	0.0330239	1
LUAD	MF	transketolase activity	3	1	0.0331412	1
LUAD	MF	Gq/11-coupled serotonin receptor activity	3	1	0.0332685	1
LUAD	BP	phospholipase C-activating serotonin receptor signaling pathway	3	1	0.0332685	1
LUAD	BP	positive regulation of phosphatidylinositol biosynthetic process	3	1	0.0332685	1
LUAD	CC	Myb complex	3	1	0.0334056	1
LUAD	BP	multicellular organism development	5001	66	0.0336237	1
LUAD	BP	negative regulation of chloride transport	3	1	0.0337096	1
LUAD	BP	establishment or maintenance of neuroblast polarity	3	1	0.0338146	1
LUAD	BP	establishment of neuroblast polarity	3	1	0.0338146	1
LUAD	BP	osmosensory signaling pathway	3	1	0.0338581	1
LUAD	BP	globus pallidus development	4	1	0.0340442	1
LUAD	CC	histone deacetylase complex	71	3	0.0341114	1
LUAD	CC	extrinsic component of postsynaptic density membrane	4	1	0.0342231	1
LUAD	CC	plasma membrane signaling receptor complex	169	5	0.0344514	1
LUAD	BP	behavior	572	11	0.0345682	1
LUAD	CC	extrinsic component of synaptic vesicle membrane	4	1	0.03458	1
LUAD	BP	protein localization to cell surface	67	3	0.0345887	1
LUAD	BP	chondroitin sulfate metabolic process	30	2	0.0345986	1
LUAD	BP	neurogenesis	1614	24	0.0347041	1
LUAD	BP	regulation of cellular process	10399	131	0.0347576	1
LUAD	BP	Wnt protein secretion	4	1	0.0348092	1
LUAD	BP	organ growth	174	5	0.0349051	1
LUAD	MF	retinol O-fatty-acyltransferase activity	3	1	0.0349166	1
LUAD	BP	specification of axis polarity	4	1	0.0350109	1
LUAD	CC	bicellular tight junction	119	4	0.0351681	1
LUAD	CC	CLOCK-BMAL transcription complex	3	1	0.0354505	1
LUAD	BP	pentose-phosphate shunt, oxidative branch	4	1	0.0355386	1
LUAD	BP	cell proliferation involved in mesonephros development	4	1	0.0359502	1
LUAD	BP	positive regulation of DNA methylation	4	1	0.0362184	1
LUAD	BP	regulation of serotonin uptake	4	1	0.0363579	1
LUAD	BP	glucosamine-containing compound metabolic process	26	2	0.0364752	1
LUAD	BP	viral latency	4	1	0.0364974	1
LUAD	BP	positive regulation of synapse structural plasticity	4	1	0.0366664	1
LUAD	BP	negative regulation of macromolecule metabolic process	3020	45	0.0367051	1
LUAD	BP	negative regulation of vascular associated smooth muscle cell migration	24	2	0.0367806	1
LUAD	MF	cyclin-dependent protein serine/threonine kinase activity	28	2	0.0370101	1
LUAD	MF	cyclin-dependent protein kinase activity	28	2	0.0370101	1
LUAD	BP	anatomical structure morphogenesis	2644	37	0.0371122	1
LUAD	BP	regulation of cellular component biogenesis	929	16	0.0371128	1
LUAD	BP	transmembrane transport	1484	24	0.0371923	1
LUAD	BP	brain renin-angiotensin system	3	1	0.0372016	1
LUAD	BP	axis elongation involved in somitogenesis	4	1	0.037302	1
LUAD	BP	formation of radial glial scaffolds	4	1	0.0375641	1
LUAD	BP	meiotic gene conversion	3	1	0.0378109	1
LUAD	BP	cellular biogenic amine catabolic process	25	2	0.0379295	1
LUAD	MF	interleukin-15 receptor activity	3	1	0.0380815	1
LUAD	BP	postsynaptic density organization	31	2	0.0380881	1
LUAD	BP	positive regulation of calcium ion transmembrane transport	72	3	0.0386148	1
LUAD	BP	negative regulation of DNA catabolic process	3	1	0.0387192	1
LUAD	BP	negative regulation of cell proliferation involved in contact inhibition	4	1	0.0391017	1
LUAD	BP	regulation of cellular component organization	2204	32	0.0391713	1
LUAD	BP	regulation of membrane potential	432	9	0.0392359	1
LUAD	BP	negative regulation of renal sodium excretion	4	1	0.0394505	1
LUAD	BP	regulation of histone methylation	69	3	0.039626	1
LUAD	BP	positive regulation of stem cell proliferation	28	2	0.0396371	1
LUAD	MF	GDP-dissociation inhibitor binding	4	1	0.0398428	1
LUAD	MF	androgen binding	4	1	0.0398598	1
LUAD	BP	epithelial cell morphogenesis	33	2	0.0399835	1
LUAD	BP	positive regulation of calcium ion transport	120	4	0.0400226	1
LUAD	BP	learning or memory	252	6	0.0401299	1
LUAD	BP	neurotransmitter metabolic process	31	2	0.040226	1
LUAD	BP	negative regulation of cell growth	187	5	0.0402975	1
LUAD	BP	regulation of cohesin loading	4	1	0.0403578	1
LUAD	BP	striated muscle contraction	175	5	0.0406345	1
LUAD	BP	regulation of histone H3-K27 trimethylation	3	1	0.0407425	1
LUAD	MF	6-phosphofructo-2-kinase activity	4	1	0.0407943	1
LUAD	MF	AMPA glutamate receptor activity	4	1	0.0414634	1
LUAD	CC	tight junction	126	4	0.0415157	1
LUAD	BP	receptor-mediated virion attachment to host cell	4	1	0.0415186	1
LUAD	BP	establishment of Sertoli cell barrier	4	1	0.041549	1
LUAD	BP	postsynaptic specialization organization	33	2	0.0420422	1
LUAD	BP	cell junction maintenance	35	2	0.0422819	1
LUAD	BP	behavioral fear response	34	2	0.0423305	1
LUAD	BP	ion transport	1507	24	0.0425752	1
LUAD	CC	serotonin receptor complex	4	1	0.042793	1
LUAD	CC	G protein-coupled serotonin receptor complex	4	1	0.042793	1
LUAD	BP	positive regulation of histone H3-K9 trimethylation	4	1	0.0428171	1
LUAD	CC	cullin-RING ubiquitin ligase complex	171	5	0.0430629	1
LUAD	BP	negative regulation of metabolic process	3222	47	0.0430866	1
LUAD	MF	interleukin-2 receptor activity	3	1	0.043227	1
LUAD	MF	interleukin-2 binding	3	1	0.043227	1
LUAD	BP	amine catabolic process	27	2	0.0432412	1
LUAD	BP	leading strand elongation	4	1	0.0433392	1
LUAD	BP	thiamine metabolic process	4	1	0.0436296	1
LUAD	BP	protein localization to bicellular tight junction	5	1	0.0440093	1
LUAD	BP	positive regulation of superoxide dismutase activity	4	1	0.0442253	1
LUAD	BP	protein localization to postsynaptic membrane	36	2	0.0442918	1
LUAD	BP	negative regulation of epithelial cell differentiation involved in kidney development	5	1	0.0442948	1
LUAD	CC	asymmetric, glutamatergic, excitatory synapse	5	1	0.0447318	1
LUAD	BP	lagging strand elongation	4	1	0.0447799	1
LUAD	BP	cation transport	1152	19	0.0448113	1
LUAD	BP	regulation of fibroblast migration	36	2	0.0450432	1
LUAD	BP	behavioral defense response	35	2	0.0451624	1
LUAD	BP	negative regulation of neuron projection development	137	4	0.045342	1
LUAD	BP	nuclear speck organization	4	1	0.0453586	1
LUAD	MF	beta-catenin binding	85	3	0.0454364	1
LUAD	BP	chondroitin sulfate proteoglycan metabolic process	35	2	0.0460591	1
LUAD	BP	regulation of prostatic bud formation	6	1	0.0462508	1
LUAD	MF	L-arginine transmembrane transporter activity	5	1	0.0463212	1
LUAD	BP	proteoglycan metabolic process	79	3	0.0464042	1
LUAD	BP	positive regulation of mesenchymal stem cell proliferation	5	1	0.0464475	1
LUAD	BP	regulation of developmental process	2392	34	0.0467604	1
LUAD	MF	fatty acid amide hydrolase activity	4	1	0.0468116	1
LUAD	BP	RNA biosynthetic process	3319	46	0.0468568	1
LUAD	BP	tube lumen cavitation	5	1	0.0468881	1
LUAD	BP	salivary gland cavitation	5	1	0.0468881	1
LUAD	MF	leukemia inhibitory factor receptor activity	5	1	0.0471851	1
LUAD	MF	oncostatin-M receptor activity	5	1	0.0471851	1
LUAD	CC	extrinsic component of postsynaptic specialization membrane	5	1	0.0473438	1
LUAD	BP	negative regulation of neurogenesis	139	4	0.0473599	1
LUAD	BP	protein localization to postsynapse	37	2	0.0476381	1
LUAD	BP	positive regulation of ATPase-coupled calcium transmembrane transporter activity	5	1	0.0476811	1
LUAD	MF	angiostatin binding	4	1	0.0477976	1
LUAD	CC	dendritic shaft	36	2	0.0478298	1
LUAD	BP	pyrimidine ribonucleotide metabolic process	29	2	0.0479238	1
LUAD	BP	regulation of phosphatidylinositol biosynthetic process	5	1	0.0479707	1
LUAD	BP	male genitalia morphogenesis	4	1	0.0479871	1
LUAD	BP	male anatomical structure morphogenesis	4	1	0.0479871	1
LUAD	BP	gene conversion	4	1	0.0482026	1
LUAD	BP	negative regulation of histone H3-K27 methylation	5	1	0.0485105	1
LUAD	MF	coreceptor activity involved in Wnt signaling pathway, planar cell polarity pathway	6	1	0.0485739	1
LUAD	BP	pyrimidine nucleotide biosynthetic process	29	2	0.0488524	1
LUAD	BP	hippo signaling	39	2	0.0489723	1
LUAD	BP	positive regulation of catecholamine metabolic process	5	1	0.0492083	1
LUAD	BP	positive regulation of dopamine metabolic process	5	1	0.0492083	1
LUAD	BP	regulation of cardiac muscle contraction	77	3	0.0492139	1
LUAD	BP	articular cartilage development	4	1	0.0494043	1
LUAD	BP	carnitine biosynthetic process	4	1	0.0494683	1
LUAD	BP	negative regulation of granulocyte chemotaxis	4	1	0.0495082	1
LUAD	BP	negative regulation of neutrophil chemotaxis	4	1	0.0495082	1
LUAD	BP	semaphorin-plexin signaling pathway	40	2	0.0499305	1
LUSC	BP	negative regulation of RNA biosynthetic process	1193	35	3.30757e-07	0.00526698
LUSC	BP	negative regulation of transcription, DNA-templated	1189	34	8.7269e-07	0.00526698
LUSC	BP	negative regulation of nucleic acid-templated transcription	1191	34	9.14221e-07	0.00526698
LUSC	BP	negative regulation of transcription by RNA polymerase II	884	28	9.24478e-07	0.00526698
LUSC	BP	negative regulation of cellular macromolecule biosynthetic process	1481	39	2.35559e-06	0.00927672
LUSC	BP	negative regulation of RNA metabolic process	1298	35	2.5262e-06	0.00927672
LUSC	BP	negative regulation of macromolecule biosynthetic process	1492	39	2.84949e-06	0.00927672
LUSC	BP	negative regulation of cellular biosynthetic process	1555	40	3.57062e-06	0.0101713
LUSC	BP	negative regulation of biosynthetic process	1587	40	5.88418e-06	0.0148994
LUSC	BP	presynapse assembly	49	6	1.51075e-05	0.0333869
LUSC	BP	negative regulation of nucleobase-containing compound metabolic process	1403	35	1.61155e-05	0.0333869
LUSC	BP	synapse organization	421	16	2.20283e-05	0.0417486
LUSC	BP	presynapse organization	52	6	2.38155e-05	0.0417486
LUSC	BP	cell junction organization	683	20	9.3183e-05	0.151682
LUSC	BP	presynaptic membrane assembly	9	3	0.000153806	0.233673
LUSC	BP	negative regulation of cellular metabolic process	2448	50	0.000187192	0.266619
LUSC	BP	presynaptic membrane organization	10	3	0.000200573	0.268874
LUSC	CC	cell junction	2047	41	0.000227169	0.287608
LUSC	BP	negative regulation of cellular process	4713	82	0.000301537	0.36167
LUSC	CC	synaptic membrane	381	13	0.000354388	0.371011
LUSC	CC	synapse	1309	29	0.000360293	0.371011
LUSC	CC	symmetric, GABA-ergic, inhibitory synapse	3	2	0.000374319	0.371011
LUSC	MF	monoamine oxidase activity	3	2	0.000374446	0.371011
LUSC	BP	regulation of presynapse organization	33	4	0.000422484	0.383553
LUSC	BP	regulation of presynapse assembly	33	4	0.000422484	0.383553
LUSC	BP	postsynapse organization	163	8	0.000437596	0.383553
LUSC	BP	regulation of biological quality	3665	66	0.000459982	0.388242
LUSC	BP	negative regulation of nitrogen compound metabolic process	2291	46	0.00048538	0.395047
LUSC	BP	regulation of synapse organization	209	9	0.000532826	0.418709
LUSC	BP	regulation of synapse structure or activity	216	9	0.000663951	0.504359
LUSC	BP	regulation of synapse assembly	100	6	0.000824419	0.597093
LUSC	BP	cell junction assembly	413	13	0.000858262	0.597093
LUSC	BP	vocalization behavior	19	3	0.000889125	0.597093
LUSC	BP	synapse assembly	177	8	0.000890831	0.597093
LUSC	BP	maintenance of postsynaptic specialization structure	5	2	0.000978309	0.625532
LUSC	CC	postsynaptic membrane	275	10	0.000988159	0.625532
LUSC	CC	asymmetric, glutamatergic, excitatory synapse	5	2	0.00102984	0.634298
LUSC	BP	regulation of RNA biosynthetic process	3182	57	0.00117121	0.702389
LUSC	CC	postsynapse	628	16	0.00161687	0.927767
LUSC	BP	Rab protein signal transduction	20	3	0.00169323	0.927767
LUSC	MF	GABA-A receptor activity	19	3	0.00171658	0.927767
LUSC	CC	GABA-A receptor complex	19	3	0.00171658	0.927767
LUSC	BP	regulation of RNA metabolic process	3454	60	0.00175058	0.927767
LUSC	BP	regulation of transcription, DNA-templated	3176	56	0.00187176	0.931783
LUSC	BP	regulation of nucleic acid-templated transcription	3177	56	0.00188676	0.931783
LUSC	BP	regulation of cell junction assembly	203	8	0.00189742	0.931783
LUSC	CC	GABA receptor complex	20	3	0.00192171	0.931783
LUSC	CC	excitatory synapse	48	4	0.00203124	0.964375
LUSC	BP	phenol-containing compound metabolic process	108	6	0.00224092	1
LUSC	BP	regulation of transcription by RNA polymerase II	2395	44	0.00228846	1
LUSC	MF	oxidoreductase activity, acting on the CH-NH2 group of donors	20	3	0.00236405	1
LUSC	MF	GABA receptor activity	22	3	0.00240664	1
LUSC	BP	cell morphogenesis involved in differentiation	688	16	0.00271098	1
LUSC	BP	dopamine catabolic process	7	2	0.00298408	1
LUSC	MF	primary amine oxidase activity	6	2	0.00311219	1
LUSC	BP	RNA biosynthetic process	3315	57	0.00321994	1
LUSC	BP	catecholamine metabolic process	52	4	0.0034778	1
LUSC	BP	catechol-containing compound metabolic process	52	4	0.0034778	1
LUSC	BP	regulation of neurotransmitter receptor localization to postsynaptic specialization membrane	9	2	0.00351105	1
LUSC	CC	glutamatergic synapse	336	10	0.00357062	1
LUSC	BP	regulation of cellular process	10367	153	0.00359376	1
LUSC	BP	axon development	464	12	0.00366759	1
LUSC	BP	catechol-containing compound catabolic process	8	2	0.00371205	1
LUSC	BP	catecholamine catabolic process	8	2	0.00371205	1
LUSC	CC	symmetric synapse	9	2	0.00403488	1
LUSC	BP	axonogenesis	417	11	0.0040888	1
LUSC	BP	cell morphogenesis involved in neuron differentiation	540	13	0.00423331	1
LUSC	BP	transcription, DNA-templated	3299	56	0.00456445	1
LUSC	BP	transcription by RNA polymerase II	2482	44	0.0045705	1
LUSC	BP	regulation of postsynaptic membrane neurotransmitter receptor levels	62	4	0.00458465	1
LUSC	BP	positive regulation of synapse assembly	59	4	0.00459477	1
LUSC	BP	nucleic acid-templated transcription	3301	56	0.0046455	1
LUSC	BP	regulation of axonogenesis	153	6	0.0046746	1
LUSC	BP	synaptic vesicle endocytosis	61	4	0.00470719	1
LUSC	BP	presynaptic endocytosis	61	4	0.00470719	1
LUSC	BP	regulation of cellular macromolecule biosynthetic process	3708	62	0.0047266	1
LUSC	BP	postsynaptic membrane assembly	10	2	0.00481816	1
LUSC	BP	organ growth	175	7	0.00482728	1
LUSC	BP	response to interleukin-2	9	2	0.00496744	1
LUSC	BP	negative regulation of cell growth	188	7	0.00505327	1
LUSC	MF	co-SMAD binding	11	2	0.00514353	1
LUSC	BP	negative regulation of biological process	5392	87	0.00533802	1
LUSC	BP	epithelial cell morphogenesis	33	3	0.00533836	1
LUSC	BP	amino acid transmembrane transport	97	5	0.00540281	1
LUSC	BP	regulation of nucleobase-containing compound metabolic process	3695	61	0.00552872	1
LUSC	BP	regulation of macromolecule biosynthetic process	3737	62	0.00562243	1
LUSC	BP	amino acid transport	141	6	0.00584542	1
LUSC	BP	ion transport	1508	30	0.0061833	1
LUSC	BP	L-alpha-amino acid transmembrane transport	64	4	0.00629415	1
LUSC	MF	activin receptor binding	9	2	0.00634619	1
LUSC	BP	regulation of cellular biosynthetic process	3891	64	0.00635028	1
LUSC	BP	protein localization to postsynapse	37	3	0.00670794	1
LUSC	CC	GABA-ergic synapse	68	4	0.0067905	1
LUSC	BP	phenol-containing compound catabolic process	11	2	0.00690089	1
LUSC	MF	phosphatidylinositol-3,5-bisphosphate 3-phosphatase activity	11	2	0.00712193	1
LUSC	BP	neurotransmitter catabolic process	11	2	0.00734447	1
LUSC	BP	negative regulation of growth	247	8	0.00750057	1
LUSC	BP	negative regulation of GTPase activity	35	3	0.00764721	1
LUSC	BP	negative regulation of histone H3-K36 methylation	1	1	0.00764802	1
LUSC	CC	BCOR complex	1	1	0.00764802	1
LUSC	BP	embryonic olfactory bulb interneuron precursor migration	1	1	0.00787478	1
LUSC	BP	somatic sex determination	1	1	0.00790525	1
LUSC	BP	male somatic sex determination	1	1	0.00790525	1
LUSC	BP	prostate induction	1	1	0.00790525	1
LUSC	BP	prostate field specification	1	1	0.00790525	1
LUSC	BP	activation of prostate induction by androgen receptor signaling pathway	1	1	0.00790525	1
LUSC	MF	POU domain binding	1	1	0.00790525	1
LUSC	MF	NAD+ nucleosidase activity	28	3	0.00797992	1
LUSC	BP	ethylene metabolic process	1	1	0.00799594	1
LUSC	MF	flavonoid 3'-monooxygenase activity	1	1	0.00799594	1
LUSC	BP	dibenzo-p-dioxin catabolic process	1	1	0.00799594	1
LUSC	BP	axon extension	120	5	0.00804467	1
LUSC	MF	WW domain binding	32	3	0.00806437	1
LUSC	BP	negative regulation of macromolecule metabolic process	3006	54	0.00821025	1
LUSC	BP	dopamine metabolic process	37	3	0.00824802	1
LUSC	BP	anion transmembrane transport	241	8	0.008311	1
LUSC	BP	L-amino acid transport	68	4	0.00845329	1
LUSC	BP	cell part morphogenesis	646	14	0.00871054	1
LUSC	MF	benzodiazepine receptor activity	11	2	0.00879275	1
LUSC	BP	thyroid hormone transport	11	2	0.00899419	1
LUSC	BP	synaptic vesicle recycling	74	4	0.00900491	1
LUSC	BP	positive regulation of cation transmembrane transport	149	6	0.00920384	1
LUSC	BP	regulation of biosynthetic process	3959	64	0.00930128	1
LUSC	MF	death receptor agonist activity	1	1	0.00990862	1
LUSC	CC	septin collar	1	1	0.0100192	1
LUSC	BP	regulation of epithelial cell differentiation involved in kidney development	16	2	0.0101892	1
LUSC	MF	iduronate-2-sulfatase activity	1	1	0.0103685	1
LUSC	BP	regulation of developmental growth	323	9	0.0103857	1
LUSC	CC	Cul4-RING E3 ubiquitin ligase complex	34	3	0.0104766	1
LUSC	BP	neuron cell-cell adhesion	16	2	0.0106629	1
LUSC	BP	synaptic vesicle maturation	12	2	0.0107359	1
LUSC	BP	positive regulation of NF-kappaB transcription factor activity	151	6	0.0111342	1
LUSC	MF	GABA-gated chloride ion channel activity	13	2	0.0112437	1
LUSC	MF	extracellular ligand-gated ion channel activity	72	4	0.0112725	1
LUSC	MF	phosphatidylinositol-3,5-bisphosphate phosphatase activity	14	2	0.0113355	1
LUSC	MF	neurotransmitter receptor activity	105	5	0.0113865	1
LUSC	BP	negative regulation of metabolic process	3207	56	0.0114455	1
LUSC	BP	positive regulation of sodium ion transmembrane transporter activity	16	2	0.0116403	1
LUSC	CC	inhibitory synapse	16	2	0.0118216	1
LUSC	CC	basal ectoplasmic specialization	1	1	0.0118368	1
LUSC	BP	developmental growth	616	14	0.0119483	1
LUSC	BP	asparagine transmembrane transport	1	1	0.0119552	1
LUSC	BP	protein localization to postsynaptic specialization membrane	16	2	0.0120164	1
LUSC	BP	neurotransmitter receptor localization to postsynaptic specialization membrane	16	2	0.0120164	1
LUSC	BP	neuron projection morphogenesis	609	13	0.0120237	1
LUSC	BP	L-ornithine import across plasma membrane	1	1	0.0121393	1
LUSC	BP	positive regulation of protein polyubiquitination	14	2	0.0121877	1
LUSC	BP	AMPA selective glutamate receptor signaling pathway	1	1	0.0123297	1
LUSC	BP	cation transport	1152	23	0.0125092	1
LUSC	MF	neurexin family protein binding	14	2	0.0126884	1
LUSC	CC	neuron projection	1356	25	0.0127127	1
LUSC	CC	bicellular tight junction	119	5	0.0128912	1
LUSC	BP	nucleobase-containing compound biosynthetic process	3685	59	0.0129421	1
LUSC	BP	amino acid import across plasma membrane	44	3	0.0130931	1
LUSC	MF	annealing activity	14	2	0.0136418	1
LUSC	MF	gluconolactonase activity	1	1	0.013657	1
LUSC	BP	negative regulation of bone development	1	1	0.013657	1
LUSC	BP	negative regulation of calcium-dependent ATPase activity	1	1	0.013657	1
LUSC	BP	regulation of dUTP diphosphatase activity	1	1	0.013657	1
LUSC	BP	positive regulation of dUTP diphosphatase activity	1	1	0.013657	1
LUSC	BP	negative regulation of aminoacyl-tRNA ligase activity	1	1	0.013657	1
LUSC	BP	regulation of leucine-tRNA ligase activity	1	1	0.013657	1
LUSC	BP	negative regulation of leucine-tRNA ligase activity	1	1	0.013657	1
LUSC	MF	histone deacetylase binding	119	5	0.0136978	1
LUSC	BP	maintenance of synapse structure	18	2	0.0138481	1
LUSC	BP	aromatic compound biosynthetic process	3764	60	0.013858	1
LUSC	MF	glycerophosphoinositol inositolphosphodiesterase activity	1	1	0.014009	1
LUSC	BP	regulation of protein localization to cell periphery	124	5	0.0140403	1
LUSC	BP	negative regulation of histone H3-K27 trimethylation	1	1	0.0142003	1
LUSC	MF	holocytochrome-c synthase activity	1	1	0.0142204	1
LUSC	BP	protein-heme linkage	1	1	0.0142204	1
LUSC	BP	protein-tetrapyrrole linkage	1	1	0.0142204	1
LUSC	BP	cytochrome c-heme linkage	1	1	0.0142204	1
LUSC	BP	positive regulation of ion transmembrane transport	165	6	0.0144118	1
LUSC	BP	developmental cell growth	232	7	0.0144366	1
LUSC	BP	plasma membrane bounded cell projection morphogenesis	624	13	0.0144781	1
LUSC	MF	chloride channel activity	74	4	0.0145194	1
LUSC	BP	organic cyclic compound biosynthetic process	3911	62	0.0146101	1
LUSC	BP	positive regulation of transmembrane transport	215	7	0.0146764	1
LUSC	BP	regulation of receptor localization to synapse	18	2	0.0147525	1
LUSC	BP	hydrogen peroxide biosynthetic process	16	2	0.0150265	1
LUSC	BP	G protein-coupled receptor catabolic process	1	1	0.0151091	1
LUSC	BP	sex determination	18	2	0.0152127	1
LUSC	BP	cell projection morphogenesis	628	13	0.0153728	1
LUSC	MF	sulfuric ester hydrolase activity	16	2	0.0154108	1
LUSC	BP	lateral sprouting involved in mammary gland duct morphogenesis	2	1	0.0155944	1
LUSC	BP	toll-like receptor 7 signaling pathway	12	2	0.0157395	1
LUSC	BP	response to interleukin-11	2	1	0.0158201	1
LUSC	MF	basic amino acid transmembrane transporter activity	17	2	0.0158373	1
LUSC	BP	cellular alkene metabolic process	2	1	0.015861	1
LUSC	BP	olefin metabolic process	2	1	0.015861	1
LUSC	CC	tight junction	126	5	0.0159626	1
LUSC	BP	response to interleukin-9	2	1	0.0161536	1
LUSC	BP	protein targeting to Golgi apparatus	1	1	0.016255	1
LUSC	MF	inhibitory extracellular ligand-gated ion channel activity	15	2	0.0162968	1
LUSC	CC	distal axon	294	8	0.0164013	1
LUSC	MF	oxidoreductase activity, acting on the CH-NH2 group of donors, oxygen as acceptor	16	2	0.0164677	1
LUSC	BP	response to interleukin-7	15	2	0.0166376	1
LUSC	BP	cellular response to interleukin-7	15	2	0.0166376	1
LUSC	BP	type III hypersensitivity	1	1	0.0166551	1
LUSC	BP	regulation of type III hypersensitivity	1	1	0.0166551	1
LUSC	BP	positive regulation of type III hypersensitivity	1	1	0.0166551	1
LUSC	BP	positive regulation of type I hypersensitivity	1	1	0.0166551	1
LUSC	BP	B cell cytokine production	1	1	0.0166551	1
LUSC	BP	regulation of B cell cytokine production	1	1	0.0166551	1
LUSC	BP	amine metabolic process	115	5	0.0169513	1
LUSC	BP	import into cell	226	7	0.0174588	1
LUSC	BP	membrane assembly	49	3	0.0175995	1
LUSC	MF	phosphatidylinositol-3-phosphatase activity	18	2	0.0176188	1
LUSC	BP	social behavior	51	3	0.0177602	1
LUSC	MF	hepatocyte growth factor binding	1	1	0.0179716	1
LUSC	MF	phospholipase activator activity	16	2	0.0181645	1
LUSC	BP	negative regulation of integrin biosynthetic process	2	1	0.0182704	1
LUSC	CC	spanning component of membrane	19	2	0.0185982	1
LUSC	BP	import across plasma membrane	176	6	0.0186125	1
LUSC	BP	regulation of growth	644	14	0.0187243	1
LUSC	BP	regulation of opioid receptor signaling pathway	2	1	0.0187256	1
LUSC	BP	heterocycle biosynthetic process	3752	59	0.0188064	1
LUSC	BP	regulation of protein linear polyubiquitination	2	1	0.0188494	1
LUSC	BP	positive regulation of protein linear polyubiquitination	2	1	0.0188494	1
LUSC	BP	muscle cell cellular homeostasis	18	2	0.0189024	1
LUSC	BP	trachea submucosa development	2	1	0.0190404	1
LUSC	BP	trachea gland development	2	1	0.0190404	1
LUSC	MF	phosphatidylinositol monophosphate phosphatase activity	19	2	0.0190897	1
LUSC	BP	regulation of protein localization to synapse	21	2	0.0192623	1
LUSC	MF	interleukin-1, type II, blocking receptor activity	2	1	0.0192835	1
LUSC	BP	positive regulation of sodium ion transmembrane transport	21	2	0.0195121	1
LUSC	BP	granulosa cell differentiation	1	1	0.0195907	1
LUSC	BP	granulosa cell development	1	1	0.0195907	1
LUSC	MF	1-(4-iodo-2,5-dimethoxyphenyl)propan-2-amine binding	2	1	0.0196899	1
LUSC	MF	structural constituent of postsynaptic specialization	2	1	0.0200239	1
LUSC	MF	structural constituent of postsynaptic density	2	1	0.0200239	1
LUSC	BP	cell-cell signaling	1605	28	0.0201216	1
LUSC	BP	biological process involved in intraspecies interaction between organisms	53	3	0.0202118	1
LUSC	BP	amino acid import	52	3	0.0203331	1
LUSC	BP	cell growth	476	11	0.0204423	1
LUSC	BP	Golgi lumen acidification	2	1	0.0208127	1
LUSC	BP	regulation of Golgi lumen acidification	2	1	0.0208127	1
LUSC	BP	latent virus replication	2	1	0.020821	1
LUSC	BP	release from viral latency	2	1	0.020821	1
LUSC	BP	cerebral cortex neuron differentiation	23	2	0.0209719	1
LUSC	BP	regulation of calcium-dependent ATPase activity	2	1	0.0214329	1
LUSC	MF	ligand-gated anion channel activity	18	2	0.0214866	1
LUSC	BP	growth	914	18	0.0215916	1
LUSC	MF	anion channel activity	84	4	0.0216379	1
LUSC	BP	regulation of nervous system development	440	10	0.0218841	1
LUSC	BP	receptor localization to synapse	57	3	0.0221262	1
LUSC	CC	dendrite	628	13	0.022508	1
LUSC	BP	serotonin transport	20	2	0.0227146	1
LUSC	BP	negative regulation of ligase activity	2	1	0.0227823	1
LUSC	BP	negative regulation of histone methylation	22	2	0.0229606	1
LUSC	CC	dendritic tree	630	13	0.0232523	1
LUSC	BP	insecticide metabolic process	2	1	0.0232966	1
LUSC	BP	regulation of cation transmembrane transport	350	9	0.0233568	1
LUSC	MF	lipase activator activity	18	2	0.0238414	1
LUSC	CC	apical junction complex	141	5	0.0238878	1
LUSC	MF	ligand-gated ion channel activity	141	5	0.0240079	1
LUSC	MF	ligand-gated channel activity	141	5	0.0240079	1
LUSC	BP	membrane biogenesis	54	3	0.0240299	1
LUSC	MF	CD40 receptor binding	2	1	0.0240523	1
LUSC	BP	ionotropic glutamate receptor signaling pathway	25	2	0.0241572	1
LUSC	BP	small GTPase mediated signal transduction	487	11	0.0245628	1
LUSC	BP	ion transmembrane transport	1100	21	0.0245921	1
LUSC	MF	activin receptor antagonist activity	2	1	0.0249761	1
LUSC	BP	L-ascorbic acid biosynthetic process	2	1	0.0250283	1
LUSC	BP	lactone biosynthetic process	2	1	0.0250283	1
LUSC	MF	linear polyubiquitin binding	2	1	0.0250377	1
LUSC	BP	peripheral B cell selection	2	1	0.0252314	1
LUSC	BP	B cell affinity maturation	2	1	0.0252314	1
LUSC	CC	chloride channel complex	50	3	0.0253963	1
LUSC	BP	regulation of renal sodium excretion	21	2	0.0254163	1
LUSC	BP	regulation of extent of cell growth	109	4	0.0254798	1
LUSC	BP	regulation of sodium ion transmembrane transporter activity	57	3	0.0254804	1
LUSC	MF	NAD(P)+ nucleosidase activity	16	2	0.025912	1
LUSC	MF	NAD+ nucleotidase, cyclic ADP-ribose generating	16	2	0.025912	1
LUSC	MF	stretch-activated, cation-selective, calcium channel activity	3	1	0.0262356	1
LUSC	BP	tertiary branching involved in mammary gland duct morphogenesis	3	1	0.0263124	1
LUSC	CC	CERF complex	2	1	0.0263354	1
LUSC	MF	heparan sulfate 6-O-sulfotransferase activity	3	1	0.0266692	1
LUSC	MF	ionotropic glutamate receptor binding	26	2	0.0270398	1
LUSC	MF	receptor antagonist activity	19	2	0.0270827	1
LUSC	BP	positive regulation of nervous system development	270	7	0.0271258	1
LUSC	BP	negative regulation of tooth mineralization	2	1	0.0273452	1
LUSC	BP	regulation of nitrogen compound metabolic process	5295	79	0.0274491	1
LUSC	BP	cellular component morphogenesis	738	14	0.0274522	1
LUSC	BP	positive regulation of epithelial cell proliferation involved in prostate gland development	3	1	0.0275587	1
LUSC	MF	transmembrane receptor protein serine/threonine kinase binding	22	2	0.0277252	1
LUSC	BP	negative regulation of axonogenesis	64	3	0.0280263	1
LUSC	BP	establishment of cell polarity involved in ameboidal cell migration	3	1	0.0281207	1
LUSC	BP	L-lysine import across plasma membrane	2	1	0.0281658	1
LUSC	MF	hydrolase activity, hydrolyzing N-glycosyl compounds	50	3	0.0282952	1
LUSC	CC	AMPA glutamate receptor complex	25	2	0.028435	1
LUSC	MF	phospholipase binding	23	2	0.0284695	1
LUSC	CC	synaptic vesicle	204	6	0.028497	1
LUSC	BP	negative regulation of neurotransmitter uptake	3	1	0.0285584	1
LUSC	BP	negative regulation of serotonin uptake	3	1	0.0285584	1
LUSC	BP	positive regulation of canonical Wnt signaling pathway	105	4	0.0286678	1
LUSC	CC	somatodendritic compartment	846	16	0.0288494	1
LUSC	BP	cell cycle G1/S phase transition	236	7	0.029015	1
LUSC	MF	solute:proton antiporter activity	22	2	0.0290517	1
LUSC	BP	negative regulation of mesenchymal to epithelial transition involved in metanephros morphogenesis	3	1	0.0294128	1
LUSC	BP	renal sodium excretion	23	2	0.0295077	1
LUSC	BP	synaptic membrane adhesion	25	2	0.0295861	1
LUSC	BP	carboxylic acid transmembrane transport	147	5	0.0297523	1
LUSC	BP	protein localization to synapse	65	3	0.0299269	1
LUSC	BP	negative regulation of activation-induced cell death of T cells	3	1	0.0300089	1
LUSC	BP	positive regulation of cell junction assembly	103	4	0.0303876	1
LUSC	MF	interleukin-4 receptor activity	2	1	0.0307617	1
LUSC	BP	9-cis-retinoic acid biosynthetic process	3	1	0.0308086	1
LUSC	BP	9-cis-retinoic acid metabolic process	3	1	0.0308086	1
LUSC	MF	ubiquitin activating enzyme activity	3	1	0.0309717	1
LUSC	MF	glycogenin glucosyltransferase activity	2	1	0.0309939	1
LUSC	MF	UDP-alpha-D-glucose:glucosyl-glycogenin alpha-D-glucosyltransferase activity	2	1	0.0309939	1
LUSC	BP	organic acid transmembrane transport	148	5	0.0310548	1
LUSC	MF	CTPase activity	3	1	0.0311695	1
LUSC	MF	bombesin receptor activity	2	1	0.0317137	1
LUSC	BP	bombesin receptor signaling pathway	2	1	0.0317137	1
LUSC	BP	maintenance of postsynaptic density structure	3	1	0.0317352	1
LUSC	BP	corticotropin-releasing hormone secretion	3	1	0.0319141	1
LUSC	BP	regulation of corticotropin-releasing hormone secretion	3	1	0.0319141	1
LUSC	BP	rhythmic synaptic transmission	3	1	0.0319708	1
LUSC	BP	Norrin signaling pathway	3	1	0.0322637	1
LUSC	MF	poly(A) binding	23	2	0.0322709	1
LUSC	BP	negative regulation of microtubule depolymerization	27	2	0.0323414	1
LUSC	BP	complement activation, alternative pathway	17	2	0.0325331	1
LUSC	BP	regulation of aminoacyl-tRNA ligase activity	2	1	0.0333187	1
LUSC	BP	regulation of excretion	24	2	0.0336221	1
LUSC	CC	integrin alphav-beta3 complex	3	1	0.0337361	1
LUSC	BP	negative regulation of anion transport	24	2	0.0338301	1
LUSC	BP	asparagine transport	3	1	0.0340881	1
LUSC	MF	L-asparagine transmembrane transporter activity	3	1	0.0340881	1
LUSC	CC	intrinsic component of synaptic membrane	162	5	0.034151	1
LUSC	BP	response to BMP	161	5	0.0342642	1
LUSC	BP	cellular response to BMP stimulus	161	5	0.0342642	1
LUSC	BP	regulation of organ growth	104	4	0.0344697	1
LUSC	MF	mechanosensitive cation channel activity	4	1	0.0348867	1
LUSC	BP	regulation of multicellular organismal development	1351	24	0.0351221	1
LUSC	MF	vascular endothelial growth factor receptor 3 binding	2	1	0.0351845	1
LUSC	BP	developmental growth involved in morphogenesis	231	6	0.0351968	1
LUSC	CC	endothelial microparticle	2	1	0.035304	1
LUSC	BP	G protein-coupled receptor signaling pathway coupled to cGMP nucleotide second messenger	2	1	0.0354118	1
LUSC	MF	ferrous iron binding	25	2	0.0354855	1
LUSC	BP	neuron projection extension	171	5	0.0355786	1
LUSC	MF	transmitter-gated ion channel activity	60	3	0.0356779	1
LUSC	MF	transmitter-gated channel activity	60	3	0.0356779	1
LUSC	BP	positive regulation of DNA-binding transcription factor activity	258	7	0.0357525	1
LUSC	BP	regulation of type I hypersensitivity	2	1	0.0358496	1
LUSC	BP	type I hypersensitivity	2	1	0.0358496	1
LUSC	CC	extrinsic component of synaptic vesicle membrane	4	1	0.0360964	1
LUSC	BP	osmosensory signaling pathway	3	1	0.0361816	1
LUSC	BP	gamma-aminobutyric acid signaling pathway	25	2	0.0361987	1
LUSC	BP	regulation of biological process	11040	156	0.0362767	1
LUSC	BP	inhibition of cysteine-type endopeptidase activity involved in apoptotic process	3	1	0.0363824	1
LUSC	BP	positive regulation of interferon-alpha production	22	2	0.0365107	1
LUSC	BP	globus pallidus development	4	1	0.0366461	1
LUSC	CC	receptor complex	387	9	0.0366495	1
LUSC	BP	positive regulation of integrin biosynthetic process	3	1	0.0366698	1
LUSC	BP	Ras protein signal transduction	327	8	0.0367382	1
LUSC	BP	regulation of cellular metabolic process	5671	83	0.037108	1
LUSC	CC	actin filament	113	4	0.0371374	1
LUSC	CC	syntrophin complex	4	1	0.0371555	1
LUSC	BP	cell morphogenesis	976	17	0.0372394	1
LUSC	BP	postsynapse assembly	29	2	0.0372897	1
LUSC	BP	establishment or maintenance of neuroblast polarity	3	1	0.0373937	1
LUSC	BP	establishment of neuroblast polarity	3	1	0.0373937	1
LUSC	CC	integral component of postsynaptic membrane	116	4	0.0375654	1
LUSC	BP	cellular biogenic amine metabolic process	98	4	0.0377275	1
LUSC	BP	positive regulation of ion transmembrane transporter activity	108	4	0.037842	1
LUSC	MF	phosphatidylinositol bisphosphate phosphatase activity	27	2	0.0379178	1
LUSC	MF	interleukin-7 receptor activity	2	1	0.0383194	1
LUSC	BP	interleukin-7-mediated signaling pathway	2	1	0.0383194	1
LUSC	BP	regulation of sodium ion transmembrane transport	67	3	0.0383443	1
LUSC	MF	transketolase activity	3	1	0.0384207	1
LUSC	MF	glutamate dehydrogenase (NAD+) activity	2	1	0.0388993	1
LUSC	MF	glutamate dehydrogenase [NAD(P)+] activity	2	1	0.0388993	1
LUSC	MF	glutamate dehydrogenase (NADP+) activity	2	1	0.0388993	1
LUSC	MF	oxidoreductase activity, acting on the CH-NH2 group of donors, NAD or NADP as acceptor	2	1	0.0388993	1
LUSC	BP	regulation of proline transport	2	1	0.038965	1
LUSC	BP	regulation of proline import across plasma membrane	2	1	0.038965	1
LUSC	BP	positive regulation of proline import across plasma membrane	2	1	0.038965	1
LUSC	BP	regulation of L-proline import across plasma membrane	2	1	0.038965	1
LUSC	BP	positive regulation of L-proline import across plasma membrane	2	1	0.038965	1
LUSC	MF	vitamin D 24-hydroxylase activity	3	1	0.0390473	1
LUSC	BP	L-alanine transmembrane transport	4	1	0.0390648	1
LUSC	BP	renal sodium ion absorption	4	1	0.0391207	1
LUSC	CC	postsynaptic specialization	352	8	0.0392052	1
LUSC	MF	Gq/11-coupled serotonin receptor activity	3	1	0.0392814	1
LUSC	BP	phospholipase C-activating serotonin receptor signaling pathway	3	1	0.0392814	1
LUSC	BP	positive regulation of phosphatidylinositol biosynthetic process	3	1	0.0392814	1
LUSC	BP	neuron differentiation	1346	22	0.0394012	1
LUSC	BP	regulation of primary metabolic process	5457	80	0.0394722	1
LUSC	MF	cysteinyl leukotriene receptor activity	2	1	0.0395426	1
LUSC	BP	regulation of toll-like receptor 8 signaling pathway	3	1	0.039552	1
LUSC	BP	positive regulation of toll-like receptor 8 signaling pathway	3	1	0.039552	1
LUSC	BP	negative regulation of chloride transport	3	1	0.0395588	1
LUSC	BP	specification of axis polarity	4	1	0.0396227	1
LUSC	BP	viral latency	4	1	0.0396256	1
LUSC	BP	neural nucleus development	63	3	0.0397022	1
LUSC	CC	desmosome	24	2	0.0397417	1
LUSC	CC	extrinsic component of postsynaptic density membrane	4	1	0.0397496	1
LUSC	CC	neuron to neuron synapse	356	8	0.0398772	1
LUSC	CC	exocytic vesicle	222	6	0.0399771	1
LUSC	BP	negative regulation of cellular response to growth factor stimulus	106	4	0.0400246	1
LUSC	BP	regulation of serotonin uptake	4	1	0.040169	1
LUSC	BP	negative regulation of DNA catabolic process	3	1	0.0405201	1
LUSC	BP	positive regulation of synapse structural plasticity	4	1	0.0406901	1
LUSC	MF	receptor serine/threonine kinase binding	27	2	0.0408618	1
LUSC	BP	nervous system development	2374	36	0.0409843	1
LUSC	BP	dibenzo-p-dioxin metabolic process	3	1	0.0410798	1
LUSC	CC	postsynaptic specialization membrane	116	4	0.041436	1
LUSC	BP	regulation of transmembrane transporter activity	271	7	0.041459	1
LUSC	BP	negative regulation of renal sodium excretion	4	1	0.0417301	1
LUSC	BP	regulation of activation-induced cell death of T cells	4	1	0.0417487	1
LUSC	BP	regulation of microtubule depolymerization	31	2	0.0423209	1
LUSC	BP	positive regulation of interleukin-4 production	25	2	0.0425517	1
LUSC	CC	histone deacetylase complex	71	3	0.0427471	1
LUSC	BP	chloride transmembrane transport	66	3	0.043141	1
LUSC	MF	G protein-coupled peptide receptor activity	142	5	0.0431673	1
LUSC	MF	interleukin-15 receptor activity	3	1	0.0433332	1
LUSC	BP	regulation of protein polyubiquitination	27	2	0.043408	1
LUSC	CC	intrinsic component of postsynaptic membrane	121	4	0.0435138	1
LUSC	BP	synaptic vesicle cycle	178	5	0.043597	1
LUSC	BP	regulation of cohesin loading	4	1	0.0441335	1
LUSC	BP	postsynaptic density organization	31	2	0.044202	1
LUSC	BP	regulation of cell growth	408	9	0.0443422	1
LUSC	BP	regulation of cell size	180	5	0.0445121	1
LUSC	BP	positive regulation of superoxide dismutase activity	4	1	0.0445304	1
LUSC	BP	tendon cell differentiation	4	1	0.0448095	1
LUSC	BP	tendon formation	4	1	0.0448095	1
LUSC	BP	biological regulation	11712	164	0.0448629	1
LUSC	BP	response to nematode	3	1	0.045212	1
LUSC	BP	regulation of histone H3-K27 trimethylation	3	1	0.0453627	1
LUSC	CC	growth cone	177	5	0.0454185	1
LUSC	BP	chloride transport	109	4	0.0456021	1
LUSC	MF	AMPA glutamate receptor activity	4	1	0.0456872	1
LUSC	MF	interleukin-2 receptor activity	3	1	0.0462106	1
LUSC	MF	interleukin-2 binding	3	1	0.0462106	1
LUSC	BP	regulation of small GTPase mediated signal transduction	291	7	0.046345	1
LUSC	BP	positive regulation of ion transport	271	7	0.046478	1
LUSC	MF	androgen binding	4	1	0.0468383	1
LUSC	BP	negative regulation of epithelial cell differentiation involved in kidney development	5	1	0.0468469	1
LUSC	CC	Schaffer collateral - CA1 synapse	78	3	0.0468576	1
LUSC	MF	L-arginine transmembrane transporter activity	5	1	0.0470366	1
LUSC	CC	endocytic vesicle	324	8	0.0471528	1
LUSC	BP	protein K27-linked deubiquitination	4	1	0.0472234	1
LUSC	BP	regulation of prostatic bud formation	6	1	0.0474998	1
LUSC	CC	anchoring junction	822	15	0.0476502	1
LUSC	MF	poly-purine tract binding	29	2	0.0478856	1
LUSC	BP	regulation of protein localization to membrane	173	5	0.0482727	1
LUSC	BP	negative regulation of complement activation, alternative pathway	3	1	0.048357	1
LUSC	CC	presynapse	498	10	0.0485888	1
LUSC	BP	postsynaptic specialization organization	33	2	0.0486061	1
LUSC	BP	neurotransmitter metabolic process	31	2	0.048609	1
LUSC	MF	nodal binding	3	1	0.0486694	1
LUSC	BP	G1/S transition of mitotic cell cycle	211	6	0.0488456	1
LUSC	BP	positive regulation of ATPase-coupled calcium transmembrane transporter activity	5	1	0.0488883	1
LUSC	BP	positive regulation of transporter activity	119	4	0.0489428	1
LUSC	CC	transport vesicle	402	9	0.049093	1
LUSC	BP	cell junction maintenance	35	2	0.0492571	1
LUSC	MF	L-histidine transmembrane transporter activity	5	1	0.0494261	1
LUSC	BP	cellular biogenic amine catabolic process	25	2	0.0494332	1
COAD	BP	negative regulation of transcription by RNA polymerase II	885	33	9.87347e-06	0.126433
COAD	BP	synapse organization	421	20	1.10892e-05	0.126433
COAD	BP	negative regulation of RNA biosynthetic process	1194	40	2.18676e-05	0.166216
COAD	BP	negative regulation of transcription, DNA-templated	1190	39	4.34996e-05	0.209063
COAD	BP	negative regulation of nucleic acid-templated transcription	1192	39	4.58412e-05	0.209063
COAD	BP	negative regulation of biosynthetic process	1590	49	5.84503e-05	0.22214
COAD	BP	negative regulation of RNA metabolic process	1299	41	7.37946e-05	0.240391
COAD	BP	cell junction organization	683	25	8.4707e-05	0.241447
COAD	CC	cell junction	2049	55	0.000128991	0.309336
COAD	BP	negative regulation of cellular biosynthetic process	1558	47	0.000135656	0.309336
COAD	BP	negative regulation of cellular macromolecule biosynthetic process	1484	45	0.000152248	0.315611
COAD	BP	negative regulation of macromolecule biosynthetic process	1495	45	0.000184244	0.350109
COAD	CC	synapse	1311	38	0.000290746	0.506353
COAD	MF	WW domain binding	32	5	0.000310878	0.506353
COAD	BP	negative regulation of nucleobase-containing compound metabolic process	1405	41	0.000475596	0.71644
COAD	MF	long-chain-alcohol O-fatty-acyltransferase activity	2	2	0.000657201	0.71644
COAD	MF	arachidoyl-CoA:1-dodecanol O-acyltransferase activity	2	2	0.000657201	0.71644
COAD	BP	regulation of proline transport	2	2	0.000691211	0.71644
COAD	BP	regulation of proline import across plasma membrane	2	2	0.000691211	0.71644
COAD	BP	positive regulation of proline import across plasma membrane	2	2	0.000691211	0.71644
COAD	BP	regulation of L-proline import across plasma membrane	2	2	0.000691211	0.71644
COAD	BP	positive regulation of L-proline import across plasma membrane	2	2	0.000691211	0.71644
COAD	CC	symmetric, GABA-ergic, inhibitory synapse	3	2	0.000772766	0.766147
COAD	MF	monoamine oxidase activity	3	2	0.00083457	0.784656
COAD	BP	presynapse assembly	49	5	0.000860256	0.784656
COAD	CC	postsynapse	628	21	0.000937904	0.822578
COAD	BP	positive regulation of cation transmembrane transport	149	9	0.00115247	0.973325
COAD	BP	presynapse organization	52	5	0.00124792	1
COAD	BP	positive regulation of transmembrane transport	215	11	0.0013002	1
COAD	MF	neurexin family protein binding	14	3	0.00151696	1
COAD	BP	negative regulation of cellular metabolic process	2459	63	0.00164188	1
COAD	BP	synapse assembly	177	9	0.00177051	1
COAD	BP	maintenance of postsynaptic specialization structure	5	2	0.00177134	1
COAD	CC	asymmetric, glutamatergic, excitatory synapse	5	2	0.00196288	1
COAD	BP	vocalization behavior	19	3	0.00197199	1
COAD	CC	glutamatergic synapse	336	13	0.00209821	1
COAD	BP	Sertoli cell differentiation	17	3	0.00216324	1
COAD	BP	positive regulation of synapse assembly	59	5	0.00234048	1
COAD	BP	positive regulation of ion transmembrane transport	165	9	0.0023735	1
COAD	BP	sex determination	18	3	0.00245866	1
COAD	BP	acylglycerol acyl-chain remodeling	4	2	0.00254987	1
COAD	BP	L-proline import across plasma membrane	4	2	0.00272526	1
COAD	BP	L-proline transmembrane transport	4	2	0.00272526	1
COAD	BP	proline import across plasma membrane	4	2	0.00272526	1
COAD	BP	wax biosynthetic process	4	2	0.00301438	1
COAD	BP	wax metabolic process	4	2	0.00301438	1
COAD	CC	synaptic membrane	382	14	0.00310936	1
COAD	BP	negative regulation of nitrogen compound metabolic process	2301	58	0.00344674	1
COAD	BP	postsynapse organization	163	8	0.00390821	1
COAD	CC	postsynaptic membrane	275	11	0.00406968	1
COAD	MF	GABA-A receptor activity	19	3	0.00416331	1
COAD	CC	GABA-A receptor complex	19	3	0.00416331	1
COAD	BP	regulation of cell junction assembly	203	9	0.00431784	1
COAD	BP	regulation of synapse assembly	100	6	0.00433404	1
COAD	CC	GABA receptor complex	20	3	0.00462601	1
COAD	BP	development of primary sexual characteristics	217	10	0.00467099	1
COAD	CC	Cul4-RING E3 ubiquitin ligase complex	34	4	0.00477627	1
COAD	BP	ion transmembrane transport	1100	31	0.00496842	1
COAD	MF	histone deacetylase binding	119	7	0.0050378	1
COAD	BP	regulation of synapse organization	209	9	0.00564362	1
COAD	MF	solute:proton antiporter activity	22	3	0.00578183	1
COAD	BP	cell junction assembly	413	14	0.00579212	1
COAD	MF	GABA receptor activity	22	3	0.00579897	1
COAD	BP	amino acid import across plasma membrane	44	4	0.00584623	1
COAD	BP	positive regulation of cell junction assembly	103	6	0.00602811	1
COAD	CC	AMPA glutamate receptor complex	25	3	0.0061318	1
COAD	BP	dopamine catabolic process	7	2	0.00636724	1
COAD	MF	oxidoreductase activity, acting on the CH-NH2 group of donors	20	3	0.00653171	1
COAD	MF	phospholipase binding	23	3	0.0065515	1
COAD	MF	primary amine oxidase activity	6	2	0.00671976	1
COAD	CC	excitatory synapse	48	4	0.00672914	1
COAD	BP	sex differentiation	266	11	0.00681652	1
COAD	BP	regulation of synapse structure or activity	216	9	0.00687	1
COAD	BP	pigment biosynthetic process	62	5	0.00687675	1
COAD	BP	social behavior	51	4	0.00700992	1
COAD	BP	regulation of atrial cardiac muscle cell membrane repolarization	8	2	0.00709307	1
COAD	BP	negative regulation of cellular process	4728	104	0.007254	1
COAD	MF	gated channel activity	333	12	0.00755162	1
COAD	BP	catechol-containing compound catabolic process	8	2	0.00777502	1
COAD	BP	catecholamine catabolic process	8	2	0.00777502	1
COAD	CC	symmetric synapse	9	2	0.00778537	1
COAD	BP	axon development	464	14	0.00822744	1
COAD	BP	postsynaptic membrane assembly	10	2	0.00834353	1
COAD	BP	biological process involved in intraspecies interaction between organisms	53	4	0.00846546	1
COAD	BP	negative regulation of histone H3-K36 methylation	1	1	0.00879338	1
COAD	CC	BCOR complex	1	1	0.00879338	1
COAD	BP	positive regulation of potassium ion transport	49	4	0.00883189	1
COAD	BP	embryonic olfactory bulb interneuron precursor migration	1	1	0.00927031	1
COAD	BP	somatic sex determination	1	1	0.00941375	1
COAD	BP	male somatic sex determination	1	1	0.00941375	1
COAD	BP	prostate induction	1	1	0.00941375	1
COAD	BP	prostate field specification	1	1	0.00941375	1
COAD	BP	activation of prostate induction by androgen receptor signaling pathway	1	1	0.00941375	1
COAD	MF	POU domain binding	1	1	0.00941375	1
COAD	BP	cellular response to testosterone stimulus	9	2	0.00955601	1
COAD	BP	presynaptic membrane assembly	9	2	0.00972282	1
COAD	BP	monoacylglycerol biosynthetic process	7	2	0.00987997	1
COAD	MF	chloride channel activity	74	5	0.00993004	1
COAD	BP	neutral lipid biosynthetic process	46	4	0.0100912	1
COAD	BP	acylglycerol biosynthetic process	46	4	0.0100912	1
COAD	BP	amino acid import	52	4	0.0102731	1
COAD	BP	ion transport	1509	39	0.010358	1
COAD	BP	positive regulation of interleukin-4 production	25	3	0.0103932	1
COAD	BP	eye pigment granule organization	1	1	0.0105742	1
COAD	BP	chondroitin sulfate metabolic process	30	3	0.0108775	1
COAD	BP	Leydig cell differentiation	11	2	0.0112037	1
COAD	BP	presynaptic membrane organization	10	2	0.0114101	1
COAD	BP	chloride transport	109	6	0.0117921	1
COAD	MF	activin receptor binding	9	2	0.0119043	1
COAD	BP	gonad development	211	9	0.011917	1
COAD	BP	epithelial cell morphogenesis	33	3	0.0120355	1
COAD	BP	atrial cardiac muscle cell membrane repolarization	11	2	0.0124099	1
COAD	CC	cAMP-dependent protein kinase complex	9	2	0.0124769	1
COAD	MF	siRNA binding	10	2	0.0124817	1
COAD	MF	acylglycerol O-acyltransferase activity	28	3	0.01282	1
COAD	BP	regulation of presynapse organization	33	3	0.013504	1
COAD	BP	regulation of presynapse assembly	33	3	0.013504	1
COAD	BP	neurotransmitter catabolic process	11	2	0.0135537	1
COAD	MF	voltage-gated chloride channel activity	11	2	0.0136281	1
COAD	BP	male sex determination	11	2	0.0138074	1
COAD	MF	death receptor agonist activity	1	1	0.0140632	1
COAD	BP	cell morphogenesis involved in differentiation	688	18	0.0142695	1
COAD	BP	proline transport	10	2	0.0144264	1
COAD	MF	O-acyltransferase activity	50	4	0.0146223	1
COAD	BP	Sertoli cell development	12	2	0.0146418	1
COAD	BP	phenol-containing compound catabolic process	11	2	0.0148225	1
COAD	BP	heme biosynthetic process	27	3	0.0151596	1
COAD	MF	UDP-glucose 6-dehydrogenase activity	1	1	0.0152494	1
COAD	BP	UDP-glucuronate biosynthetic process	1	1	0.0152494	1
COAD	MF	phosphatidylinositol-3,5-bisphosphate 3-phosphatase activity	11	2	0.0152711	1
COAD	BP	protein palmitoleylation	1	1	0.0152912	1
COAD	CC	anchoring junction	822	22	0.0153958	1
COAD	BP	nervous system process involved in regulation of systemic arterial blood pressure	12	2	0.0154491	1
COAD	BP	synaptic vesicle endocytosis	61	4	0.0156269	1
COAD	BP	presynaptic endocytosis	61	4	0.0156269	1
COAD	MF	benzodiazepine receptor activity	11	2	0.0161817	1
COAD	CC	ionotropic glutamate receptor complex	39	3	0.0163958	1
COAD	BP	proline transmembrane transport	10	2	0.0164723	1
COAD	BP	regulation of respiratory gaseous exchange by nervous system process	13	2	0.0165554	1
COAD	BP	thyroid hormone transport	11	2	0.0166338	1
COAD	MF	anion channel activity	84	5	0.0166643	1
COAD	MF	DNA hairpin binding	1	1	0.0167966	1
COAD	BP	chondroitin sulfate proteoglycan metabolic process	35	3	0.0170189	1
COAD	BP	axonogenesis	417	12	0.0170882	1
COAD	BP	regulation of histone H3-K9 trimethylation	11	2	0.0171018	1
COAD	CC	basal ectoplasmic specialization	1	1	0.0172973	1
COAD	BP	response to parathyroid hormone	12	2	0.0172981	1
COAD	BP	transcription by RNA polymerase II	2486	57	0.0174828	1
COAD	BP	neuron cell-cell adhesion	16	2	0.0178898	1
COAD	MF	solute:cation antiporter activity	34	3	0.0179247	1
COAD	BP	cation transmembrane transport	885	24	0.0182672	1
COAD	BP	lateral sprouting involved in mammary gland duct morphogenesis	2	1	0.0183275	1
COAD	BP	L-ornithine import across plasma membrane	1	1	0.0183517	1
COAD	MF	N-acetylglucosaminyldiphosphodolichol N-acetylglucosaminyltransferase activity	1	1	0.0183933	1
COAD	MF	spermine synthase activity	1	1	0.018449	1
COAD	BP	positive regulation of anion transmembrane transport	11	2	0.0186178	1
COAD	BP	enteric nervous system development	15	2	0.0186533	1
COAD	MF	peptidyl-dipeptidase inhibitor activity	1	1	0.0187425	1
COAD	BP	cell migration involved in gastrulation	14	2	0.0190311	1
COAD	BP	response to interleukin-11	2	1	0.0191857	1
COAD	BP	seminiferous tubule development	12	2	0.0193143	1
COAD	BP	negative regulation of GTPase activity	35	3	0.0196008	1
COAD	BP	regulation of DNA catabolic process	11	2	0.019638	1
COAD	BP	post-embryonic appendage morphogenesis	1	1	0.0196547	1
COAD	BP	post-embryonic limb morphogenesis	1	1	0.0196547	1
COAD	BP	post-embryonic forelimb morphogenesis	1	1	0.0196547	1
COAD	BP	telomeric repeat-containing RNA transcription	1	1	0.0196547	1
COAD	BP	telomeric repeat-containing RNA transcription by RNA polymerase II	1	1	0.0196547	1
COAD	BP	regulation of telomeric RNA transcription from RNA pol II promoter	1	1	0.0196547	1
COAD	BP	negative regulation of telomeric RNA transcription from RNA pol II promoter	1	1	0.0196547	1
COAD	BP	positive regulation of telomeric RNA transcription from RNA pol II promoter	1	1	0.0196547	1
COAD	BP	AMPA selective glutamate receptor signaling pathway	1	1	0.0196768	1
COAD	BP	inorganic ion transmembrane transport	843	23	0.0197299	1
COAD	MF	GABA-gated chloride ion channel activity	13	2	0.0197914	1
COAD	CC	neurotransmitter receptor complex	41	3	0.0198917	1
COAD	BP	positive regulation of ion transport	271	10	0.0199518	1
COAD	BP	nervous system development	2376	51	0.019964	1
COAD	BP	response to interleukin-9	2	1	0.0202657	1
COAD	CC	GABA-ergic synapse	68	4	0.0203897	1
COAD	BP	synaptic vesicle maturation	12	2	0.0208111	1
COAD	BP	neuron development	1090	26	0.0210921	1
COAD	MF	Fc-gamma receptor I complex binding	2	1	0.0211003	1
COAD	BP	iron-sulfur cluster export from the mitochondrion	1	1	0.0211344	1
COAD	MF	ABC-type iron-sulfur cluster transporter activity	1	1	0.0211344	1
COAD	BP	iron-sulfur cluster transmembrane transport	1	1	0.0211344	1
COAD	BP	regulation of iron-sulfur cluster assembly	1	1	0.0211344	1
COAD	BP	positive regulation of iron-sulfur cluster assembly	1	1	0.0211344	1
COAD	CC	postsynaptic specialization	352	11	0.0211787	1
COAD	BP	protein targeting to Golgi apparatus	1	1	0.0211996	1
COAD	BP	transmembrane transport	1485	37	0.0217559	1
COAD	CC	inhibitory synapse	16	2	0.022041	1
COAD	BP	L-alpha-amino acid transmembrane transport	64	4	0.022227	1
COAD	MF	glycerophosphoinositol inositolphosphodiesterase activity	1	1	0.0223467	1
COAD	BP	porphyrin-containing compound biosynthetic process	31	3	0.0226359	1
COAD	BP	tetrapyrrole biosynthetic process	31	3	0.0226359	1
COAD	BP	negative regulation of histone H3-K27 trimethylation	1	1	0.0226479	1
COAD	BP	tubulin deacetylation	13	2	0.0226637	1
COAD	BP	DNA catabolic process	31	3	0.0226753	1
COAD	BP	regulation of respiratory system process	16	2	0.0227404	1
COAD	BP	interleukin-4 production	33	3	0.0234884	1
COAD	BP	regulation of interleukin-4 production	33	3	0.0234884	1
COAD	BP	anion transmembrane transport	241	9	0.0236291	1
COAD	BP	epithelial cell development	219	8	0.0237765	1
COAD	MF	structural constituent of postsynaptic specialization	2	1	0.0238097	1
COAD	MF	structural constituent of postsynaptic density	2	1	0.0238097	1
COAD	MF	gluconolactonase activity	1	1	0.0240016	1
COAD	BP	negative regulation of bone development	1	1	0.0240016	1
COAD	BP	negative regulation of calcium-dependent ATPase activity	1	1	0.0240016	1
COAD	BP	regulation of dUTP diphosphatase activity	1	1	0.0240016	1
COAD	BP	positive regulation of dUTP diphosphatase activity	1	1	0.0240016	1
COAD	BP	negative regulation of aminoacyl-tRNA ligase activity	1	1	0.0240016	1
COAD	BP	regulation of leucine-tRNA ligase activity	1	1	0.0240016	1
COAD	BP	negative regulation of leucine-tRNA ligase activity	1	1	0.0240016	1
COAD	BP	reproductive structure development	412	13	0.0242067	1
COAD	MF	palmitoleoyltransferase activity	2	1	0.0242091	1
COAD	BP	amino acid transmembrane transport	97	5	0.024241	1
COAD	BP	UDP-glucuronate metabolic process	2	1	0.0243145	1
COAD	MF	phosphatidylinositol-3,5-bisphosphate phosphatase activity	14	2	0.0243691	1
COAD	BP	Rho protein signal transduction	135	6	0.0243739	1
COAD	MF	N-acylglucosamine 2-epimerase activity	1	1	0.0244675	1
COAD	BP	regulation of amino acid import across plasma membrane	13	2	0.0245607	1
COAD	BP	regulation of amino acid transmembrane transport	13	2	0.0245607	1
COAD	BP	regulation of peripheral T cell tolerance induction	1	1	0.0247694	1
COAD	BP	positive regulation of peripheral T cell tolerance induction	1	1	0.0247694	1
COAD	BP	cell morphogenesis involved in neuron differentiation	540	14	0.0251677	1
COAD	BP	reproductive system development	415	13	0.0252372	1
COAD	BP	maintenance of synapse structure	18	2	0.0252486	1
COAD	BP	positive regulation of sodium ion transmembrane transporter activity	16	2	0.0252695	1
COAD	BP	brown fat cell proliferation	1	1	0.0255709	1
COAD	BP	regulation of brown fat cell proliferation	1	1	0.0255709	1
COAD	BP	positive regulation of brown fat cell proliferation	1	1	0.0255709	1
COAD	BP	type III hypersensitivity	1	1	0.0256593	1
COAD	BP	regulation of type III hypersensitivity	1	1	0.0256593	1
COAD	BP	positive regulation of type III hypersensitivity	1	1	0.0256593	1
COAD	BP	positive regulation of type I hypersensitivity	1	1	0.0256593	1
COAD	BP	B cell cytokine production	1	1	0.0256593	1
COAD	BP	regulation of B cell cytokine production	1	1	0.0256593	1
COAD	CC	nuclear RNA export factor complex	1	1	0.0257942	1
COAD	BP	histone H4-K5 acetylation	15	2	0.025814	1
COAD	BP	histone H4-K8 acetylation	15	2	0.025814	1
COAD	BP	granulosa cell differentiation	1	1	0.025951	1
COAD	BP	granulosa cell development	1	1	0.025951	1
COAD	BP	negative regulation of integrin biosynthetic process	2	1	0.0259746	1
COAD	BP	trachea submucosa development	2	1	0.0260059	1
COAD	BP	trachea gland development	2	1	0.0260059	1
COAD	BP	pigment metabolic process	84	5	0.0260129	1
COAD	MF	ornithine carbamoyltransferase activity	1	1	0.0260973	1
COAD	BP	ornithine catabolic process	1	1	0.0260973	1
COAD	BP	cardiac muscle contraction	136	6	0.0261966	1
COAD	BP	regulation of protein linear polyubiquitination	2	1	0.0262927	1
COAD	BP	positive regulation of protein linear polyubiquitination	2	1	0.0262927	1
COAD	CC	Cry-Per complex	1	1	0.0263471	1
COAD	MF	hepatocyte growth factor binding	1	1	0.0264172	1
COAD	CC	organelle outer membrane	227	9	0.0264778	1
COAD	MF	L-DOPA receptor activity	1	1	0.0264816	1
COAD	MF	L-DOPA binding	1	1	0.0264816	1
COAD	CC	6-phosphofructo-2-kinase/fructose-2,6-biphosphatase complex	1	1	0.0264934	1
COAD	CC	sperm end piece	1	1	0.0265522	1
COAD	MF	CTP synthase activity	2	1	0.0265829	1
COAD	BP	'de novo' CTP biosynthetic process	2	1	0.0265829	1
COAD	MF	1-(4-iodo-2,5-dimethoxyphenyl)propan-2-amine binding	2	1	0.0267651	1
COAD	BP	regulation of transcription by RNA polymerase II	2399	54	0.0267747	1
COAD	BP	regulation of dendritic spine morphogenesis	45	3	0.0269782	1
COAD	BP	regulation of opioid receptor signaling pathway	2	1	0.0270901	1
COAD	BP	protein deacetylation	100	5	0.0271153	1
COAD	MF	choline-phosphate cytidylyltransferase activity	2	1	0.0273054	1
COAD	MF	voltage-gated anion channel activity	15	2	0.0273139	1
COAD	BP	cation transport	1152	29	0.0274792	1
COAD	CC	costamere	18	2	0.0275863	1
COAD	CC	outer membrane	229	9	0.0276039	1
COAD	BP	central nervous system development	1005	24	0.0276728	1
COAD	MF	ligand-gated ion channel activity	141	6	0.0278502	1
COAD	MF	ligand-gated channel activity	141	6	0.0278502	1
COAD	MF	interleukin-1, type II, blocking receptor activity	2	1	0.0279156	1
COAD	BP	synaptic vesicle recycling	74	4	0.0280259	1
COAD	BP	cellular iron ion homeostasis	63	4	0.0280317	1
COAD	BP	regulation of phospholipid metabolic process	38	3	0.0284167	1
COAD	BP	striated muscle contraction	175	7	0.0285138	1
COAD	BP	glycerolipid biosynthetic process	244	9	0.0285429	1
COAD	BP	chondroitin sulfate biosynthetic process	18	2	0.0288363	1
COAD	BP	latent virus replication	2	1	0.0289681	1
COAD	BP	release from viral latency	2	1	0.0289681	1
COAD	BP	L-amino acid transport	68	4	0.0289752	1
COAD	MF	quaternary ammonium group binding	38	3	0.0290981	1
COAD	BP	import across plasma membrane	176	7	0.0291088	1
COAD	BP	Golgi lumen acidification	2	1	0.0296145	1
COAD	BP	regulation of Golgi lumen acidification	2	1	0.0296145	1
COAD	BP	histone H2A monoubiquitination	17	2	0.0296955	1
COAD	MF	chondroitin 6-sulfotransferase activity	2	1	0.0302378	1
COAD	BP	cardiac muscle cell action potential	75	4	0.0302669	1
COAD	BP	positive regulation of dendritic spine morphogenesis	19	2	0.0303322	1
COAD	CC	somatodendritic compartment	846	21	0.0303647	1
COAD	MF	inhibitory extracellular ligand-gated ion channel activity	15	2	0.0305084	1
COAD	BP	neuron differentiation	1347	30	0.030628	1
COAD	CC	asymmetric synapse	331	10	0.0309768	1
COAD	BP	monoacylglycerol metabolic process	14	2	0.0310456	1
COAD	BP	atrial cardiac muscle cell action potential	19	2	0.0313307	1
COAD	BP	atrial cardiac muscle cell to AV node cell signaling	19	2	0.0313307	1
COAD	BP	atrial cardiac muscle cell to AV node cell communication	19	2	0.0313307	1
COAD	BP	G protein-coupled purinergic nucleotide receptor signaling pathway	13	2	0.0314224	1
COAD	MF	G protein-coupled purinergic nucleotide receptor activity	13	2	0.0314224	1
COAD	CC	polysome	65	4	0.0319566	1
COAD	BP	negative regulation of antifungal innate immune response	2	1	0.0320813	1
COAD	MF	peptidase inhibitor activity	175	8	0.0321063	1
COAD	MF	CD40 receptor binding	2	1	0.0321586	1
COAD	BP	histone H3-K9 trimethylation	15	2	0.0324547	1
COAD	BP	gap junction assembly	17	2	0.0325105	1
COAD	BP	positive regulation of phospholipid metabolic process	15	2	0.0325171	1
COAD	BP	male gonad development	138	6	0.0325753	1
COAD	CC	actin filament	113	5	0.0326114	1
COAD	BP	regulation of histone methylation	69	4	0.0329367	1
COAD	BP	regulation of calcium-dependent ATPase activity	2	1	0.033121	1
COAD	BP	development of primary male sexual characteristics	139	6	0.0331292	1
COAD	BP	negative regulation of tooth mineralization	2	1	0.033583	1
COAD	MF	oxidoreductase activity, acting on the CH-NH2 group of donors, oxygen as acceptor	16	2	0.0336029	1
COAD	BP	inorganic anion transport	177	7	0.0336139	1
COAD	BP	neuron projection morphogenesis	609	15	0.0336829	1
COAD	BP	T cell aggregation	2	1	0.0338325	1
COAD	MF	phospholipase activator activity	16	2	0.0339441	1
COAD	BP	CD4-positive, CD25-positive, alpha-beta regulatory T cell lineage commitment	2	1	0.0341299	1
COAD	BP	positive regulation of potassium ion transmembrane transport	42	3	0.0341724	1
COAD	BP	establishment of epithelial cell apical/basal polarity	17	2	0.0344514	1
COAD	MF	stretch-activated, cation-selective, calcium channel activity	3	1	0.0346715	1
COAD	BP	spermine biosynthetic process	2	1	0.0348106	1
COAD	BP	ammonium homeostasis	2	1	0.0350355	1
COAD	BP	peripheral T cell tolerance induction	2	1	0.0350885	1
COAD	BP	chromatin remodeling	230	9	0.0350931	1
COAD	BP	interleukin-10 production	61	4	0.0353025	1
COAD	BP	regulation of interleukin-10 production	61	4	0.0353025	1
COAD	CC	cytoophidium	3	1	0.0353139	1
COAD	MF	heparan sulfate 6-O-sulfotransferase activity	3	1	0.0353192	1
COAD	BP	regulation of membrane repolarization during atrial cardiac muscle cell action potential	2	1	0.0353357	1
COAD	BP	establishment or maintenance of epithelial cell apical/basal polarity	44	3	0.0353834	1
COAD	BP	maintenance of mitotic sister chromatid cohesion, telomeric	2	1	0.0354513	1
COAD	BP	mitotic sister chromatid cohesion, telomeric	2	1	0.0354513	1
COAD	BP	regulation of maintenance of mitotic sister chromatid cohesion, telomeric	2	1	0.0354513	1
COAD	BP	negative regulation of maintenance of mitotic sister chromatid cohesion, telomeric	2	1	0.0354513	1
COAD	CC	ion channel complex	279	9	0.0357587	1
COAD	BP	regulation of cation transmembrane transport	350	11	0.0358993	1
COAD	BP	tertiary branching involved in mammary gland duct morphogenesis	3	1	0.0360267	1
COAD	CC	spanning component of membrane	19	2	0.0360405	1
COAD	MF	extracellular ligand-gated ion channel activity	72	4	0.0360503	1
COAD	BP	import into cell	226	8	0.0361441	1
COAD	BP	proteoglycan metabolic process	79	4	0.0364957	1
COAD	CC	mitochondrial outer membrane	203	8	0.0365894	1
COAD	MF	phosphatidylinositol-3-phosphatase activity	18	2	0.0366414	1
COAD	BP	peripheral B cell selection	2	1	0.0368388	1
COAD	BP	B cell affinity maturation	2	1	0.0368388	1
COAD	MF	G protein-coupled UTP receptor activity	2	1	0.0375203	1
COAD	BP	negative regulation of ligase activity	2	1	0.0376616	1
COAD	BP	establishment of cell polarity involved in ameboidal cell migration	3	1	0.037819	1
COAD	BP	neuron projection development	949	22	0.0378296	1
COAD	MF	mu-type opioid receptor binding	4	1	0.0382021	1
COAD	BP	regulation of respiratory gaseous exchange	21	2	0.0383573	1
COAD	BP	cell-cell signaling	1608	36	0.0383728	1
COAD	BP	response to biotin	2	1	0.0384558	1
COAD	BP	positive regulation of epithelial cell proliferation involved in prostate gland development	3	1	0.038553	1
COAD	BP	negative regulation of histone modification	46	3	0.038634	1
COAD	CC	muscle tendon junction	2	1	0.038743	1
COAD	MF	activin receptor antagonist activity	2	1	0.0387712	1
COAD	BP	negative regulation of metabolic process	3233	73	0.0388358	1
COAD	CC	dendrite	628	16	0.0388746	1
COAD	BP	negative regulation of neurotransmitter uptake	3	1	0.0389212	1
COAD	BP	negative regulation of serotonin uptake	3	1	0.0389212	1
COAD	MF	phosphatidylinositol monophosphate phosphatase activity	19	2	0.0390009	1
COAD	MF	peptidyl-dipeptidase activity	2	1	0.0391519	1
COAD	MF	ligand-gated anion channel activity	18	2	0.0394196	1
COAD	CC	dendritic tree	630	16	0.0401736	1
COAD	BP	brain development	733	18	0.0403749	1
COAD	BP	L-ascorbic acid biosynthetic process	2	1	0.0405249	1
COAD	BP	lactone biosynthetic process	2	1	0.0405249	1
COAD	BP	regulation of transmembrane transporter activity	271	9	0.0405706	1
COAD	BP	negative regulation of macromolecule metabolic process	3031	69	0.040746	1
COAD	BP	regulation of small GTPase mediated signal transduction	291	9	0.0408983	1
COAD	BP	positive regulation of sodium ion transmembrane transport	21	2	0.0409076	1
COAD	BP	plasma membrane bounded cell projection morphogenesis	624	15	0.0409917	1
COAD	BP	cardiolipin metabolic process	17	2	0.041018	1
COAD	BP	carboxylic acid transmembrane transport	147	6	0.0411607	1
COAD	MF	neurotransmitter receptor activity	105	5	0.0414069	1
COAD	CC	cell-substrate junction	422	12	0.0416023	1
COAD	CC	chromosome, subtelomeric region	2	1	0.0416303	1
COAD	BP	heterocycle biosynthetic process	3758	80	0.041688	1
COAD	BP	glycerolipid metabolic process	382	12	0.0416956	1
COAD	BP	cerebral cortex neuron differentiation	23	2	0.0418989	1
COAD	BP	fatty acid derivative biosynthetic process	44	3	0.0420812	1
COAD	BP	negative regulation of transcription from RNA polymerase II promoter involved in smooth muscle cell differentiation	3	1	0.0424575	1
COAD	MF	tRNA (guanine-N7-)-methyltransferase activity	2	1	0.0426088	1
COAD	BP	tRNA (guanine-N7)-methylation	2	1	0.0426088	1
COAD	MF	beta-catenin destruction complex binding	2	1	0.0426823	1
COAD	BP	organic acid transmembrane transport	148	6	0.0428901	1
COAD	BP	protein deacylation	111	5	0.0431207	1
COAD	BP	L-lysine import across plasma membrane	2	1	0.0431764	1
COAD	BP	establishment of endothelial blood-brain barrier	2	1	0.0432307	1
COAD	BP	spermatocyte division	2	1	0.0432586	1
COAD	BP	glutamine family amino acid biosynthetic process	17	2	0.0434087	1
COAD	BP	negative regulation of mesenchymal to epithelial transition involved in metanephros morphogenesis	3	1	0.0435182	1
COAD	BP	mannosamine metabolic process	2	1	0.043589	1
COAD	BP	N-acetylmannosamine metabolic process	2	1	0.043589	1
COAD	BP	cell projection morphogenesis	628	15	0.0436077	1
COAD	BP	histone H3 deacetylation	20	2	0.0438233	1
COAD	BP	ionotropic glutamate receptor signaling pathway	25	2	0.0438904	1
COAD	BP	regulation of biological quality	3673	77	0.0439816	1
COAD	BP	regulation of T cell antigen processing and presentation	2	1	0.0442126	1
COAD	MF	lipase activator activity	18	2	0.0442156	1
COAD	BP	maintenance of postsynaptic density structure	3	1	0.0442326	1
COAD	CC	CERF complex	2	1	0.0443975	1
COAD	BP	serotonin transport	20	2	0.0445197	1
COAD	MF	bombesin receptor activity	2	1	0.0446647	1
COAD	BP	bombesin receptor signaling pathway	2	1	0.0446647	1
COAD	BP	aromatic compound biosynthetic process	3770	80	0.044755	1
COAD	BP	cell morphogenesis	976	22	0.0448868	1
COAD	CC	synaptonemal complex	40	3	0.045087	1
COAD	CC	synaptonemal structure	40	3	0.045087	1
COAD	BP	establishment or maintenance of apical/basal cell polarity	49	3	0.0453362	1
COAD	BP	establishment or maintenance of bipolar cell polarity	49	3	0.0453362	1
COAD	BP	glycosaminoglycan metabolic process	117	5	0.0453682	1
COAD	BP	gastrulation with mouth forming second	24	2	0.045372	1
COAD	MF	inorganic anion transmembrane transporter activity	149	6	0.0455281	1
COAD	BP	mesenchymal cell proliferation involved in ureteric bud development	3	1	0.0455977	1
COAD	BP	multicellular organism development	5011	100	0.0456604	1
COAD	BP	corticotropin-releasing hormone secretion	3	1	0.0456735	1
COAD	BP	regulation of corticotropin-releasing hormone secretion	3	1	0.0456735	1
COAD	MF	tyrosine binding	2	1	0.0456938	1
COAD	BP	histone lysine methylation	114	5	0.0456998	1
COAD	MF	mechanosensitive cation channel activity	4	1	0.045773	1
COAD	BP	negative regulation of activation-induced cell death of T cells	3	1	0.0459579	1
COAD	BP	positive regulation of integrin biosynthetic process	3	1	0.0461038	1
COAD	BP	regulation of cellular process	10420	206	0.0463206	1
COAD	BP	axis specification	86	4	0.0464353	1
COAD	BP	mesonephric duct morphogenesis	3	1	0.0465696	1
COAD	MF	5-aminolevulinate synthase activity	2	1	0.0465935	1
COAD	MF	N-succinyltransferase activity	2	1	0.0465935	1
COAD	BP	cellular response to aldosterone	3	1	0.0467943	1
COAD	MF	ubiquitin activating enzyme activity	3	1	0.047208	1
COAD	BP	positive regulation of amino acid transport	19	2	0.0472284	1
COAD	MF	vascular endothelial growth factor receptor 3 binding	2	1	0.0473404	1
COAD	BP	chondroitin sulfate proteoglycan biosynthetic process	23	2	0.047426	1
COAD	BP	Rab protein signal transduction	20	2	0.0474414	1
COAD	MF	carboxyl- or carbamoyltransferase activity	2	1	0.047524	1
COAD	BP	negative regulation of histone methylation	22	2	0.0476753	1
COAD	CC	neuron to neuron synapse	356	10	0.0478631	1
COAD	BP	arginine biosynthetic process via ornithine	2	1	0.0480286	1
COAD	MF	acyltransferase activity, transferring groups other than amino-acyl groups	206	8	0.048109	1
COAD	BP	rhythmic synaptic transmission	3	1	0.0485131	1
COAD	BP	hypothalamus development	22	2	0.0485362	1
COAD	BP	regulation of type I hypersensitivity	2	1	0.0486482	1
COAD	BP	type I hypersensitivity	2	1	0.0486482	1
COAD	BP	macromolecule deacylation	115	5	0.0486963	1
COAD	MF	amyloid-beta binding	83	4	0.0488483	1
COAD	BP	negative regulation of isotype switching to IgE isotypes	3	1	0.0492739	1
COAD	BP	regulation of aminoacyl-tRNA ligase activity	2	1	0.0492877	1
COAD	BP	negative regulation of potassium ion export across plasma membrane	3	1	0.0493678	1
COAD	CC	syntrophin complex	4	1	0.0495361	1
COAD	BP	dendritic spine morphogenesis	59	3	0.0496256	1
COAD	MF	transcription regulator inhibitor activity	21	2	0.0497892	1
COAD	BP	positive regulation of tolerance induction dependent upon immune response	2	1	0.0498663	1
COAD	BP	regulation of peripheral tolerance induction	2	1	0.0498663	1
COAD	BP	positive regulation of peripheral tolerance induction	2	1	0.0498663	1
COAD	CC	bicellular tight junction	119	5	0.0499227	1
COAD	CC	extrinsic component of synaptic vesicle membrane	4	1	0.0499806	1
COAD	BP	N-acetylglucosamine metabolic process	19	2	0.0499821	1
KIRC	BP	regulation of biological quality	3674	113	0.000365648	1
KIRC	BP	regulation of proline transport	2	2	0.000532901	1
KIRC	BP	regulation of proline import across plasma membrane	2	2	0.000532901	1
KIRC	BP	positive regulation of proline import across plasma membrane	2	2	0.000532901	1
KIRC	BP	regulation of L-proline import across plasma membrane	2	2	0.000532901	1
KIRC	BP	positive regulation of L-proline import across plasma membrane	2	2	0.000532901	1
KIRC	MF	glucose-6-phosphate dehydrogenase activity	2	2	0.00058862	1
KIRC	BP	regulation of systemic arterial blood pressure by hormone	36	5	0.00115984	1
KIRC	MF	monoamine oxidase activity	3	2	0.0013437	1
KIRC	BP	corticotropin-releasing hormone secretion	3	2	0.00138294	1
KIRC	BP	regulation of corticotropin-releasing hormone secretion	3	2	0.00138294	1
KIRC	BP	regulation of post-translational protein modification	3	2	0.00150059	1
KIRC	BP	positive regulation of integrin biosynthetic process	3	2	0.00194667	1
KIRC	MF	phospholipase binding	23	4	0.00195821	1
KIRC	BP	regulation of fibrinolysis	13	3	0.0022564	1
KIRC	BP	endocrine process	82	7	0.00248085	1
KIRC	BP	substantia nigra development	43	5	0.00248206	1
KIRC	BP	blood coagulation, intrinsic pathway	4	2	0.00268095	1
KIRC	BP	pentose-phosphate shunt, oxidative branch	4	2	0.00270881	1
KIRC	BP	L-proline import across plasma membrane	4	2	0.0028002	1
KIRC	BP	L-proline transmembrane transport	4	2	0.0028002	1
KIRC	BP	proline import across plasma membrane	4	2	0.0028002	1
KIRC	BP	neural nucleus development	63	6	0.00301964	1
KIRC	MF	insulin-like growth factor-activated receptor activity	3	2	0.00319621	1
KIRC	BP	regulation of systemic arterial blood pressure mediated by a chemical signal	46	5	0.00368647	1
KIRC	BP	regulation of systemic arterial blood pressure by vasopressin	5	2	0.00391661	1
KIRC	BP	response to tetrachloromethane	4	2	0.00410009	1
KIRC	BP	hemostasis	217	12	0.00430341	1
KIRC	BP	response to iron(III) ion	5	2	0.00466999	1
KIRC	BP	sphingomyelin metabolic process	15	3	0.00473324	1
KIRC	BP	regulation of integrin biosynthetic process	5	2	0.00501305	1
KIRC	BP	regulation of body fluid levels	372	17	0.00540331	1
KIRC	BP	regulation of systemic arterial blood pressure	94	7	0.00570461	1
KIRC	MF	sulfuric ester hydrolase activity	17	3	0.00605447	1
KIRC	MF	gated channel activity	333	16	0.00610571	1
KIRC	MF	primary amine oxidase activity	6	2	0.00628057	1
KIRC	BP	cholesterol biosynthetic process	55	5	0.00672766	1
KIRC	BP	secondary alcohol biosynthetic process	55	5	0.00672766	1
KIRC	BP	motor neuron axon guidance	31	4	0.00704462	1
KIRC	BP	hydrogen peroxide metabolic process	55	5	0.00748653	1
KIRC	BP	post-translational protein modification	36	4	0.00784095	1
KIRC	BP	positive regulation of amino acid transport	19	3	0.00788679	1
KIRC	MF	voltage-gated ion channel activity	196	11	0.00814467	1
KIRC	MF	voltage-gated channel activity	196	11	0.00814467	1
KIRC	MF	lipase activator activity	18	3	0.00837786	1
KIRC	BP	integrin biosynthetic process	6	2	0.00855041	1
KIRC	BP	regulation of SREBP signaling pathway	7	2	0.00876388	1
KIRC	BP	response to blue light	7	2	0.0090671	1
KIRC	MF	cytochrome-b5 reductase activity, acting on NAD(P)H	7	2	0.00913532	1
KIRC	MF	oxidoreductase activity, acting on the CH-NH2 group of donors	20	3	0.00932226	1
KIRC	CC	brush border membrane	58	5	0.00946191	1
KIRC	BP	blood coagulation	212	11	0.00968171	1
KIRC	BP	multicellular organismal process	7185	188	0.00997455	1
KIRC	BP	dopamine catabolic process	7	2	0.0108487	1
KIRC	MF	dopamine binding	7	2	0.0108947	1
KIRC	BP	insulin-like growth factor receptor signaling pathway	36	4	0.0108981	1
KIRC	BP	alcohol biosynthetic process	137	8	0.0110872	1
KIRC	BP	sterol biosynthetic process	62	5	0.0112439	1
KIRC	BP	coagulation	217	11	0.0112945	1
KIRC	MF	RNA 2'-O-methyltransferase activity	8	2	0.011772	1
KIRC	BP	positive regulation of blood coagulation	22	3	0.0119105	1
KIRC	BP	positive regulation of hemostasis	22	3	0.0119105	1
KIRC	BP	regulation of prostatic bud formation	6	2	0.012099	1
KIRC	BP	histone H3-K27 trimethylation	8	2	0.0126811	1
KIRC	BP	regulation of systemic arterial blood pressure by renin-angiotensin	22	3	0.0127026	1
KIRC	BP	positive regulation of coagulation	23	3	0.013348	1
KIRC	BP	cation transmembrane transport	885	31	0.0138007	1
KIRC	CC	platelet alpha granule lumen	64	5	0.0138781	1
KIRC	BP	fibrinolysis	24	3	0.0138834	1
KIRC	BP	catechol-containing compound catabolic process	8	2	0.0139453	1
KIRC	BP	catecholamine catabolic process	8	2	0.0139453	1
KIRC	CC	platelet alpha granule	87	6	0.0141973	1
KIRC	BP	negative regulation of fibrinolysis	9	2	0.0143668	1
KIRC	MF	solute:proton antiporter activity	22	3	0.0144741	1
KIRC	MF	structural constituent of myelin sheath	9	2	0.0148542	1
KIRC	BP	vocalization behavior	19	3	0.0149194	1
KIRC	BP	sequestering of actin monomers	9	2	0.0150201	1
KIRC	CC	ESC/E(Z) complex	9	2	0.0150372	1
KIRC	BP	cation transport	1153	38	0.0156051	1
KIRC	MF	dioxygenase activity	90	6	0.0156404	1
KIRC	BP	blastocyst hatching	25	3	0.0157796	1
KIRC	BP	hatching	25	3	0.0157796	1
KIRC	BP	organism emergence from protective structure	25	3	0.0157796	1
KIRC	BP	negative regulation of fibroblast growth factor receptor signaling pathway	22	3	0.0158699	1
KIRC	MF	phosphoprotein binding	88	6	0.0160638	1
KIRC	BP	regulation of atrial cardiac muscle cell membrane repolarization	8	2	0.0162531	1
KIRC	MF	insulin receptor binding	23	3	0.0164535	1
KIRC	BP	ion transport	1509	47	0.0170109	1
KIRC	CC	cAMP-dependent protein kinase complex	9	2	0.0172094	1
KIRC	BP	RNA polymerase I preinitiation complex assembly	9	2	0.0172336	1
KIRC	BP	cellular response to testosterone stimulus	9	2	0.0175977	1
KIRC	BP	virion attachment to host cell	9	2	0.0176626	1
KIRC	BP	cellular biogenic amine catabolic process	25	3	0.017888	1
KIRC	MF	oxidoreductase activity, acting on NAD(P)H, heme protein as acceptor	10	2	0.0183121	1
KIRC	BP	tRNA nucleoside ribose methylation	1	1	0.0186755	1
KIRC	MF	tRNA (guanosine-2'-O-)-methyltransferase activity	1	1	0.0186755	1
KIRC	MF	tRNA (cytosine-2'-O-)-methyltransferase activity	1	1	0.0186755	1
KIRC	MF	iduronate-2-sulfatase activity	1	1	0.0186801	1
KIRC	BP	protein palmitoleylation	1	1	0.0187094	1
KIRC	BP	proline transmembrane transport	10	2	0.0188144	1
KIRC	MF	quercetin 2,3-dioxygenase activity	1	1	0.0188402	1
KIRC	BP	blood coagulation, fibrin clot formation	10	2	0.0188875	1
KIRC	CC	presynaptic intermediate filament cytoskeleton	1	1	0.0189226	1
[truncated: 1,954 more rows]
