# Supplementary material for: Attenuated sex-related DNA methylation differences in cancer highlight the magnitude bias mediating existing disparities
Source: Biol Sex Differ. 2024 Dec 23;15:106. doi: 10.1186/s13293-024-00682-4 (PMC11664931; doi:10.1186/s13293-024-00682-4)
Supplement: Supplementary file 7 — Supplementary material 7. [file 13293_2024_682_MOESM7_ESM.xlsx]

## Sheet: LIHC
CpG	sex	meanDiff	ses	pval	bonf	CHR	MAPINFO	gene	feat.cgi
cg06621784	female	-0.16166	0.0119858	2.38563e-26	8.68099e-21	1	53480551	SCP2	TSS200-opensea
cg13814654	female	0.259501	0.0194888	6.26665e-26	2.28035e-20	2	101666894	TBC1D8	Body-opensea
cg14054357	female	0.272108	0.0232108	5.14896e-22	1.87363e-16	17	2607986	KIAA0664	5'UTR-island
cg07688052	female	0.226411	0.0198387	3.02486e-21	1.1007e-15	19	16637309	CHERP	Body-shore
cg13798825	female	-0.191358	0.0170151	7.80085e-21	2.83862e-15	7	28725358	CREB5	Body-opensea
cg10505257	female	0.284971	0.0255269	1.2512e-20	4.55294e-15	16	4731639	MGRN1	Body-island
cg18110520	female	0.250112	0.0231216	9.0116e-20	3.27919e-14	11	76803666	CAPN5	Body-opensea
cg13678641	female	-0.0513626	0.00483426	2.69914e-19	9.82178e-14	17	8113909	AURKB	TSS200-island
cg01975877	female	0.243851	0.02301	3.14987e-19	1.14619e-13	1	9324232	H6PD	Body-island
cg09042787	female	0.212575	0.0200874	3.43286e-19	1.24917e-13	17	17463324	PEMT	Body-shore
cg00576774	female	-0.240651	0.0228204	4.23926e-19	1.54261e-13	7	28725676	CREB5	TSS200-opensea
cg00981877	female	-0.0870861	0.00850113	2.35403e-18	8.56598e-13	20	50366841	ATP9A	Body-opensea
cg19786751	female	0.313174	0.0305844	2.41341e-18	8.78205e-13	12	109639296	ACACB	Body-opensea
cg24318537	female	0.219615	0.0215644	3.30819e-18	1.2038e-12	12	121159512	UNC119B	3'UTR-shelf
cg16423624	female	0.288457	0.0289401	1.1317e-17	4.11809e-12	12	112220997	ALDH2	Body-opensea
cg01714932	female	0.218976	0.0220255	1.30716e-17	4.75658e-12	12	9360854	PZP	1stExon-opensea
cg03497652	female	0.32555	0.0327835	1.39659e-17	5.08201e-12	16	4751569	ANKS3	Body-opensea
cg05009047	female	0.252591	0.0255452	1.77473e-17	6.45798e-12	16	4659466	FAM100A	3'UTR-island
cg09417937	female	0.0904592	0.00925614	3.40406e-17	1.23869e-11	11	1298918	TOLLIP	Body-shore
cg10479063	female	0.255657	0.0262241	3.89813e-17	1.41848e-11	12	9360933	PZP	1stExon-opensea
cg22152887	female	0.192873	0.0199031	5.42085e-17	1.97257e-11	11	72849944	FCHSD2	Body-shelf
cg12371587	female	-0.173577	0.0179175	5.51455e-17	2.00667e-11	22	42093157	C22orf46	3'UTR-shelf
cg27659014	female	-0.0428081	0.00447001	1.03059e-16	3.75017e-11	15	40886649	CASC5	5'UTR-island
cg07812289	female	0.220044	0.0238414	7.26154e-16	2.64237e-10	16	4731718	MGRN1	Body-island
cg16719582	female	0.276343	0.0299495	7.36555e-16	2.68022e-10	12	133090971	FBRSL1	Body-opensea
cg05972059	female	0.198451	0.02157	8.55044e-16	3.11139e-10	3	66456600	LRIG1	Body-opensea
cg08269316	female	-0.138016	0.0150309	9.46975e-16	3.44591e-10	4	174254507	HMGB2	Body-shore
cg05979320	female	-0.161828	0.0177003	1.18102e-15	4.29755e-10	12	49629187		IGR-shore
cg19588538	female	0.310468	0.0340713	1.39966e-15	5.09317e-10	10	5693331	ASB13	Body-opensea
cg26915558	female	0.222592	0.0244446	1.45019e-15	5.27703e-10	11	68181218	LRP5	Body-island
cg11009596	female	-0.230971	0.0253684	1.46079e-15	5.31561e-10	17	8113758	AURKB	5'UTR-island
cg12418739	female	0.162126	0.0179396	2.1284e-15	7.74496e-10	11	68115681	LRP5	Body-island
cg08906442	female	0.226704	0.0250871	2.13597e-15	7.77249e-10	1	246939499		IGR-opensea
cg12921171	female	0.262862	0.0291928	2.55831e-15	9.30934e-10	15	63204710		IGR-opensea
cg23012676	female	-0.0998378	0.0110977	2.67662e-15	9.73986e-10	8	38385908	C8orf86	1stExon-opensea
cg08819417	female	0.155334	0.0172834	2.81097e-15	1.02287e-09	16	4659349	FAM100A	3'UTR-island
cg10299448	female	-0.0492016	0.00549582	3.41496e-15	1.24266e-09	17	10018532	GAS7	Body-opensea
cg05617798	female	-0.150449	0.0168501	3.90185e-15	1.41983e-09	17	8113714	AURKB	5'UTR-island
cg05233128	female	0.279456	0.0313245	4.06366e-15	1.47871e-09	19	3659669	PIP5K1C	Body-island
cg13253199	female	0.259452	0.0291482	4.54783e-15	1.65489e-09	12	109684116	ACACB	Body-opensea
cg13894813	female	0.212305	0.0239816	5.94983e-15	2.16506e-09	11	68181087	LRP5	Body-island
cg22046661	female	-0.0644149	0.00729485	6.74666e-15	2.45501e-09	11	68890686		IGR-opensea
cg03611809	female	0.157297	0.0178259	6.98072e-15	2.54018e-09	1	43709209		IGR-opensea
cg21009747	female	0.320582	0.0364127	7.79764e-15	2.83745e-09	22	36681341	MYH9	Body-opensea
cg05463307	female	0.241147	0.027452	8.70428e-15	3.16736e-09	6	138729779	HEBP2	Body-shelf
cg21072795	female	-0.321963	0.0367182	9.50398e-15	3.45836e-09	12	54920931	NCKAP1L	Body-opensea
cg08701566	female	-0.159503	0.0181988	9.71683e-15	3.53582e-09	15	78911099	CHRNA3	Body-shore
cg04880546	female	-0.154691	0.0177206	1.18e-14	4.29385e-09	12	120868468		IGR-opensea
cg00459078	female	-0.0921613	0.010562	1.2042e-14	4.38192e-09	17	43024659	KIF18B	5'UTR-island
cg07979316	female	-0.143057	0.0164558	1.44036e-14	5.24127e-09	2	24306908	TP53I3	Body-shore
cg17183362	female	-0.242827	0.0279705	1.53877e-14	5.59937e-09	6	31804159	C6orf48	5'UTR-shore
cg26894259	female	-0.114348	0.0132323	1.91887e-14	6.98249e-09	1	27817246	WASF2	TSS1500-shore
cg12159575	female	-0.0457717	0.00533052	2.59857e-14	9.45584e-09	19	4910274	UHRF1	5'UTR-shore
cg18842353	female	-0.294244	0.0345978	4.08477e-14	1.48639e-08	13	97794052		IGR-opensea
cg27016272	female	0.236282	0.0277893	4.13188e-14	1.50353e-08	3	32344486	CMTM8	Body-opensea
cg24938956	female	-0.0406166	0.00478826	4.61485e-14	1.67928e-08	19	4670603	C19orf10	TSS200-shore
cg05053327	female	0.285067	0.0336153	4.67327e-14	1.70054e-08	17	40837383	CNTNAP1	Body-island
cg27573549	female	0.260516	0.0308798	5.94573e-14	2.16357e-08	19	56189952	EPN1	Body-shelf
cg19854293	female	0.190576	0.0225997	6.07142e-14	2.2093e-08	5	1052919	SLC12A7	Body-shore
cg20668546	female	0.199442	0.0236619	6.19992e-14	2.25607e-08	17	42989323	GFAP	Body-shore
cg26914705	female	-0.141019	0.0167437	6.42862e-14	2.33928e-08	22	32341446	C22orf24	TSS200-shore
cg13709634	female	0.322041	0.0383327	7.21569e-14	2.62569e-08	11	679709	DEAF1	Body-opensea
cg17295666	female	-0.175163	0.0209257	8.53069e-14	3.1042e-08	20	3140861	UBOX5	TSS1500-shore
cg11191040	female	-0.203771	0.0245384	1.22845e-13	4.47014e-08	1	28907634	SNHG12	Body-shore
cg13053914	female	0.127039	0.0153623	1.48425e-13	5.40099e-08	7	75511260	RHBDD2	Body-shelf
cg23021796	female	0.273061	0.033079	1.60894e-13	5.8547e-08	5	98269394		IGR-shelf
cg14015726	female	0.333787	0.0404711	1.67416e-13	6.09203e-08	22	40807049	MKL1	3'UTR-opensea
cg09180239	female	0.148491	0.0180739	1.99116e-13	7.24557e-08	16	85666676	KIAA0182	5'UTR-island
cg04801430	female	0.261624	0.0318809	2.09698e-13	7.63062e-08	19	3659739	PIP5K1C	Body-island
cg00128386	female	0.141944	0.0173055	2.14419e-13	7.80242e-08	16	85665539	KIAA0182	5'UTR-shore
cg00738178	female	-0.376675	0.0459629	2.22755e-13	8.10575e-08	1	53480710	SCP2	1stExon-opensea
cg13686795	female	0.263868	0.0322124	2.27297e-13	8.27103e-08	7	151522573	PRKAG2	Body-opensea
cg10507988	female	0.115358	0.0140844	2.28628e-13	8.31944e-08	2	46593271	EPAS1	Body-opensea
cg03180953	female	0.180779	0.0220833	2.33956e-13	8.51334e-08	16	1842505	IGFALS	Body-island
cg00564759	female	-0.187909	0.0230339	2.72906e-13	9.93066e-08	16	29818771	MAZ	Body-island
cg09533293	female	-0.130018	0.0159536	2.85359e-13	1.03838e-07	15	60689670	ANXA2	5'UTR-shore
cg23654174	female	-0.164382	0.0202198	3.182e-13	1.15789e-07	1	47779667	STIL	5'UTR-shore
cg00891995	female	-0.179364	0.0221333	3.66382e-13	1.33321e-07	1	153113262	SPRR2C	Body-opensea
cg04387175	female	0.129796	0.0160403	3.90907e-13	1.42246e-07	16	88568629	ZFPM1	Body-shore
cg13014333	female	-0.140641	0.0174216	4.33518e-13	1.57751e-07	6	31762776	VARS	Body-shore
cg14549976	female	-0.0740385	0.00918563	4.64158e-13	1.68901e-07	18	77551537		IGR-shore
cg25792518	female	0.277253	0.0344735	5.1113e-13	1.85993e-07	17	48545950	ACSF2	Body-island
cg07556730	female	0.33916	0.0422563	5.58135e-13	2.03097e-07	11	679706	DEAF1	Body-opensea
cg01645729	female	-0.284647	0.0356027	6.60671e-13	2.40409e-07	2	131582240		IGR-opensea
cg04612488	female	-0.0494314	0.00621582	8.31877e-13	3.02709e-07	17	8113907	AURKB	TSS200-island
cg05238695	female	0.277504	0.0349036	8.40618e-13	3.05889e-07	21	35883588	KCNE1	1stExon-opensea
cg00225067	female	0.105934	0.0133588	9.40092e-13	3.42086e-07	3	45647141	LIMD1	Body-opensea
cg24988159	female	0.260714	0.0328797	9.42899e-13	3.43108e-07	15	35591514		IGR-opensea
cg02319187	female	0.302522	0.0381579	9.48877e-13	3.45283e-07	9	137229907	RXRA	Body-island
cg07183218	female	0.115694	0.0146411	1.09273e-12	3.97629e-07	16	85551748		IGR-shore
cg05647567	female	-0.131336	0.0166254	1.10631e-12	4.0257e-07	5	172222550		IGR-opensea
cg10640333	female	0.187504	0.0237636	1.16335e-12	4.23325e-07	2	63280625	OTX1	Body-shore
cg12649208	female	0.233641	0.0296194	1.17754e-12	4.28492e-07	17	48548533	ACSF2	Body-shore
cg07908654	female	0.292981	0.0371695	1.21516e-12	4.4218e-07	13	41631052		IGR-shelf
cg11729019	female	0.207149	0.0263627	1.38773e-12	5.04976e-07	12	7188330	C1R	Body-opensea
cg03127563	female	-0.093905	0.0119655	1.46209e-12	5.32034e-07	8	38385808	C8orf86	Body-opensea
cg04294971	female	0.417438	0.0532766	1.56501e-12	5.69484e-07	17	80006775	RFNG	Body-shore
cg08729600	female	0.30572	0.039028	1.58164e-12	5.75536e-07	12	9360986	PZP	TSS200-opensea
cg15918766	female	-0.0923416	0.0117932	1.60941e-12	5.85641e-07	12	53662405	ESPL1	5'UTR-island
cg02354658	female	0.296466	0.0379156	1.70749e-12	6.21333e-07	5	95151391	GLRX	3'UTR-opensea
cg16278077	female	0.0668972	0.00856653	1.80136e-12	6.55489e-07	1	205635579	SLC45A3	5'UTR-shelf
cg04070176	female	-0.0896735	0.0115266	2.10999e-12	7.67796e-07	16	3020118	PAQR4	Body-island
cg17278718	female	-0.0831935	0.0106978	2.14395e-12	7.80154e-07	19	4670639	C19orf10	TSS1500-shore
cg16361543	female	0.0876949	0.0112771	2.14764e-12	7.81496e-07	11	1299372	TOLLIP	Body-island
cg02275396	female	0.294595	0.0380262	2.51219e-12	9.1415e-07	19	15554549	WIZ	Body-shelf
cg27000120	female	0.216727	0.0279915	2.57447e-12	9.36812e-07	16	88917283	GALNS	Body-opensea
cg06671654	female	0.0372228	0.00481657	2.7825e-12	1.01251e-06	6	31750165	VARS	Body-opensea
cg22579950	female	-0.087275	0.0113159	3.02311e-12	1.10007e-06	13	50654649	DLEU2	Body-shore
cg22989419	female	-0.206732	0.0268435	3.21029e-12	1.16818e-06	20	9340396	PLCB4	Body-opensea
cg05839570	female	0.188838	0.0245293	3.26073e-12	1.18653e-06	3	46730941	ALS2CL	5'UTR-shelf
cg08918811	female	-0.0193101	0.00251302	3.52218e-12	1.28167e-06	11	19262251	E2F8	1stExon-shore
cg14373380	female	0.176269	0.0229446	3.55274e-12	1.29279e-06	1	16268457	ZBTB17	3'UTR-shore
cg17504997	female	-0.0639385	0.00835829	4.23041e-12	1.53939e-06	5	59995433	DEPDC1B	Body-island
cg11835512	female	-0.184225	0.0240857	4.25214e-12	1.5473e-06	19	11266792	SPC24	TSS1500-shore
cg05745622	female	0.231205	0.0302994	4.68241e-12	1.70386e-06	17	80510469	FOXK2	Body-opensea
cg04510459	female	-0.289305	0.0379802	5.02944e-12	1.83014e-06	1	92048287		IGR-opensea
cg25702651	female	-0.340873	0.0447776	5.15656e-12	1.8764e-06	3	192675515		IGR-opensea
cg19897979	female	-0.125847	0.0165411	5.28026e-12	1.92141e-06	1	25687812	TMEM50A	3'UTR-opensea
cg19822434	female	-0.0906105	0.0119259	5.57973e-12	2.03039e-06	X	118744347		IGR-shelf
cg14204677	female	0.141083	0.0185836	5.75907e-12	2.09565e-06	13	110281069		IGR-opensea
cg00702638	female	-0.268764	0.0354322	5.96259e-12	2.1697e-06	3	44803293	KIF15	1stExon-island
cg14023556	female	0.17512	0.0231295	6.42469e-12	2.33785e-06	12	110007591	MMAB	Body-shelf
cg23807215	female	0.162272	0.0214562	6.71457e-12	2.44334e-06	2	101666942	TBC1D8	Body-opensea
cg06270545	female	0.234777	0.0310724	6.97473e-12	2.53801e-06	15	65385417	LOC390595	3'UTR-opensea
cg07730183	female	0.147999	0.019602	7.18612e-12	2.61493e-06	16	2136400	TSC2	Body-shore
cg01284289	female	-0.176729	0.0234082	7.19817e-12	2.61931e-06	12	66025635		IGR-opensea
cg19515518	female	-0.037686	0.0049939	7.33168e-12	2.6679e-06	11	694717	TMEM80	TSS1500-shore
cg11131117	female	0.265248	0.0351635	7.45436e-12	2.71254e-06	7	1891496	MAD1L1	Body-shore
cg02835462	female	0.278908	0.0369926	7.60288e-12	2.76658e-06	1	46391567	MAST2	Body-opensea
cg01521060	female	0.261723	0.0347396	7.83727e-12	2.85187e-06	11	75476921		IGR-shelf
cg27111150	female	0.198151	0.0263059	7.8905e-12	2.87124e-06	10	97183248	SORBS1	Body-opensea
cg17801765	female	-0.119583	0.0159345	9.15179e-12	3.33021e-06	1	958274	AGRN	Body-shore
cg01973483	female	0.197434	0.0263364	9.54751e-12	3.47421e-06	12	123591123	PITPNM2	5'UTR-opensea
cg27620946	female	-0.0519096	0.0069322	9.98444e-12	3.6332e-06	8	42011116	AP3M2	5'UTR-shore
cg03610629	female	0.293332	0.0391849	1.01093e-11	3.67862e-06	11	611114	PHRF1	Body-shore
cg06186808	female	0.237091	0.0316961	1.042e-11	3.79167e-06	14	24600901	FITM1	1stExon-shore
cg07797805	female	-0.200366	0.0268457	1.13708e-11	4.13768e-06	20	25387977	GINS1	TSS1500-shore
cg13061124	female	0.245909	0.032963	1.15818e-11	4.21445e-06	8	58903894		IGR-shelf
cg05501426	female	-0.265423	0.0356315	1.22786e-11	4.468e-06	16	1037381		IGR-island
cg27017251	female	0.183116	0.0245914	1.24589e-11	4.5336e-06	22	22334553	TOP3B	5'UTR-shelf
cg19095143	female	-0.137438	0.0184588	1.25053e-11	4.55049e-06	3	51721872	TEX264	Body-opensea
cg26454350	female	0.189088	0.0254471	1.35357e-11	4.92546e-06	17	27493204	MYO18A	Body-island
cg15026634	female	0.135368	0.0182713	1.51931e-11	5.52857e-06	2	63280097	OTX1	5'UTR-shore
cg18595639	female	0.145885	0.0197357	1.66025e-11	6.0414e-06	1	9324274	H6PD	Body-island
cg11998932	female	-0.292507	0.0395859	1.68495e-11	6.13131e-06	7	3901843	SDK1	Body-opensea
cg15602548	female	-0.0728058	0.00985503	1.69809e-11	6.17913e-06	2	54786148	SPTBN1	Body-shore
cg01666550	female	0.0474745	0.00642901	1.72757e-11	6.28638e-06	11	68183850	LRP5	Body-shelf
cg04984818	female	0.140246	0.0189995	1.75383e-11	6.38195e-06	14	104195301	ZFYVE21	Body-shore
cg04757012	female	-0.0222349	0.00301236	1.75685e-11	6.39293e-06	6	33359817	KIFC1	Body-island
cg19368031	female	0.294816	0.0399917	1.84503e-11	6.71381e-06	10	76688843	MYST4	Body-opensea
cg21077300	female	-0.198138	0.0269304	1.99179e-11	7.24784e-06	3	56833821	ARHGEF3	Body-shore
cg09165170	female	-0.103859	0.0141196	2.01011e-11	7.3145e-06	1	10601579	PEX14	Body-opensea
cg17578755	female	0.0461295	0.00627868	2.10359e-11	7.65468e-06	11	1299291	TOLLIP	Body-island
cg05128038	female	-0.0346698	0.00472071	2.13492e-11	7.76867e-06	22	32341390	C22orf24	TSS200-shore
cg24740274	female	-0.248275	0.0338368	2.21238e-11	8.05056e-06	10	98100153		IGR-opensea
cg24607755	female	-0.308119	0.0420264	2.28171e-11	8.30281e-06	11	36171375	LDLRAD3	Body-opensea
cg12638776	female	-0.0776226	0.0105976	2.36689e-11	8.61278e-06	1	205628183	SLC45A3	3'UTR-shelf
cg22840650	female	0.176948	0.0241716	2.4184e-11	8.80021e-06	10	99271879	UBTD1	Body-opensea
cg04089703	female	0.133325	0.0182224	2.46906e-11	8.98457e-06	22	38471573	PICK1	3'UTR-shore
cg03676485	female	-0.362617	0.0495976	2.53946e-11	9.24075e-06	7	2563816	LFNG	Body-island
cg26219152	female	0.199781	0.0273608	2.66863e-11	9.71077e-06	6	152443475	SYNE1	3'UTR-opensea
cg10298992	female	0.298519	0.0410311	3.06339e-11	1.11472e-05	16	75103853	ZNRF1	Body-opensea
cg20699492	female	0.288929	0.0398051	3.34571e-11	1.21746e-05	10	25315221	THNSL1	3'UTR-opensea
cg22498365	female	-0.128991	0.0177768	3.38884e-11	1.23315e-05	17	80829028	TBCD	Body-shore
cg02614683	female	0.08626	0.0119038	3.56547e-11	1.29742e-05	11	68153951	LRP5	Body-island
cg15002250	female	-0.0871498	0.0120275	3.57641e-11	1.30141e-05	2	236619445	AGAP1	Body-opensea
cg10369896	female	0.24492	0.0338622	3.82851e-11	1.39314e-05	7	1748766	ELFN1	TSS200-opensea
cg10170214	female	-0.0587405	0.00812956	3.97709e-11	1.44721e-05	10	102765227	LZTS2	Body-island
cg00524374	female	-0.391691	0.0542457	4.0792e-11	1.48436e-05	10	3894968		IGR-opensea
cg04703620	female	-0.25479	0.0352929	4.10898e-11	1.4952e-05	5	2703395		IGR-opensea
cg00159379	female	0.215662	0.0298777	4.13326e-11	1.50404e-05	4	85818877	WDFY3	5'UTR-opensea
cg22749173	female	-0.0848206	0.0117621	4.28299e-11	1.55852e-05	19	2614039	GNG7	5'UTR-island
cg25564800	female	-0.158717	0.0220211	4.37039e-11	1.59032e-05	3	122234134	KPNA1	TSS1500-shore
cg24937685	female	0.254348	0.0353505	4.66418e-11	1.69723e-05	11	129806002	PRDM10	Body-opensea
cg20703564	female	-0.215064	0.0299229	4.85687e-11	1.76735e-05	20	36157016	BLCAP	TSS1500-shore
cg19723715	female	-0.0878021	0.0122393	5.20991e-11	1.89581e-05	7	1125817	GPER	TSS1500-shore
cg13435834	female	-0.176729	0.0246416	5.25984e-11	1.91398e-05	7	1123508	C7orf50	Body-shelf
cg09040896	female	-0.131387	0.0183219	5.28573e-11	1.9234e-05	16	1560040	TELO2	3'UTR-island
cg18558767	female	-0.13553	0.0189504	5.84198e-11	2.12582e-05	3	71592056	FOXP1	5'UTR-opensea
cg01395261	female	0.167044	0.0233693	5.95937e-11	2.16853e-05	19	18260515	MAST3	Body-island
cg25641145	female	-0.136507	0.0191342	6.40351e-11	2.33015e-05	8	101572366	ANKRD46	TSS1500-shore
cg14197831	female	0.254838	0.0357593	6.66556e-11	2.42551e-05	9	34593659		IGR-shore
cg24921221	female	-0.362796	0.0510393	7.33009e-11	2.66732e-05	8	12584192	LONRF1	Body-opensea
cg12704462	female	0.272995	0.0384328	7.52274e-11	2.73742e-05	12	120151527	MIR1178	Body-opensea
cg23460285	female	0.135248	0.0191082	8.57375e-11	3.11987e-05	12	133076687	FBRSL1	Body-shelf
cg15285733	female	-0.207302	0.0292903	8.59618e-11	3.12803e-05	17	10039537	GAS7	Body-opensea
cg18030386	female	0.268539	0.037957	8.71555e-11	3.17147e-05	19	4944160	UHRF1	Body-island
cg04104489	female	0.272669	0.0385437	8.73975e-11	3.18027e-05	1	64063351	PGM1	Body-shelf
cg27206903	female	0.0839112	0.0118699	8.97032e-11	3.26417e-05	17	80006003	RFNG	3'UTR-shelf
cg18019810	female	-0.109846	0.0155398	8.99804e-11	3.27426e-05	2	236619304	AGAP1	Body-opensea
cg16356013	female	-0.0908435	0.0128945	1.01652e-10	3.69899e-05	5	134722079	H2AFY	Body-opensea
cg00434573	female	0.211695	0.0300702	1.0436e-10	3.79751e-05	19	2041960	MKNK2	Body-island
cg12362629	female	-0.156741	0.0222655	1.04577e-10	3.8054e-05	22	36716469	MYH9	Body-shore
cg11876177	female	0.152658	0.021695	1.06244e-10	3.86609e-05	6	25874121	SLC17A3	5'UTR-opensea
cg07058027	female	0.212897	0.0303237	1.15266e-10	4.19438e-05	11	7694188	CYB5R2	5'UTR-shore
cg26690592	female	-0.211025	0.0300596	1.15612e-10	4.20698e-05	11	19261879	E2F8	5'UTR-shore
cg02594426	female	0.261464	0.0372504	1.16292e-10	4.23171e-05	15	64999695		IGR-shelf
cg00594148	female	-0.140699	0.0200534	1.18036e-10	4.29515e-05	16	67979437	SLC12A4	Body-opensea
cg03760191	female	0.119584	0.0170507	1.19745e-10	4.35737e-05	10	22623047		IGR-shore
cg19774788	female	-0.136389	0.0194517	1.20819e-10	4.39642e-05	3	52127988	WDR51A	Body-opensea
cg26818786	female	-0.280399	0.0400152	1.2359e-10	4.49726e-05	5	40841493	CARD6	1stExon-opensea
cg05020510	female	-0.136934	0.0195496	1.25426e-10	4.56409e-05	8	120428057	NOV	TSS1500-shore
cg25004840	female	-0.358922	0.0512498	1.26116e-10	4.58918e-05	2	235330993		IGR-opensea
cg09870609	female	-0.313436	0.0448532	1.3651e-10	4.96741e-05	15	81702952		IGR-opensea
cg10506715	female	0.2694	0.038556	1.3707e-10	4.98777e-05	14	100793557	C14orf68	Body-shore
cg25778892	female	-0.199929	0.0286237	1.3885e-10	5.05257e-05	7	1250126		IGR-shore
cg08223651	female	0.191816	0.0274661	1.39589e-10	5.07944e-05	6	30308712	TRIM39	Body-opensea
cg09321109	female	0.370774	0.0531144	1.41787e-10	5.15943e-05	16	2087555	SLC9A3R2	Body-shore
cg24430201	female	0.195178	0.0279638	1.42544e-10	5.18699e-05	19	2228815	DOT1L	Body-shore
cg15063366	female	-0.29787	0.0427027	1.45667e-10	5.30062e-05	2	228683032		IGR-opensea
cg04875697	female	0.28115	0.0403548	1.52174e-10	5.5374e-05	9	137228542	RXRA	Body-shore
cg07297802	female	-0.0609685	0.00876257	1.59493e-10	5.80373e-05	11	62622622	SNORD27	TSS200-shore
cg02553054	female	-0.207161	0.0297775	1.602e-10	5.82946e-05	12	50478480	SMARCD1	TSS1500-shore
cg22799110	female	0.122127	0.0175709	1.6562e-10	6.02669e-05	11	68181288	LRP5	Body-island
cg17846467	female	0.195365	0.0281191	1.67978e-10	6.1125e-05	12	12446971		IGR-opensea
cg18218112	female	0.28925	0.0417653	1.88252e-10	6.85022e-05	7	1748639	ELFN1	TSS200-opensea
cg05545808	female	-0.113535	0.016425	2.01533e-10	7.3335e-05	16	81712102	CMIP	Body-island
cg01698448	female	-0.140936	0.0203942	2.03374e-10	7.4005e-05	2	233213824		IGR-shore
cg25027584	female	0.264853	0.0383303	2.04218e-10	7.43119e-05	7	1748302	ELFN1	TSS1500-opensea
cg11401159	female	0.186128	0.0269464	2.0676e-10	7.52371e-05	5	6759129		IGR-shelf
cg02080909	female	0.21902	0.0317228	2.10136e-10	7.64656e-05	17	79058333	BAIAP2	Body-opensea
cg05062489	female	-0.289586	0.0420105	2.22345e-10	8.09082e-05	3	109404367		IGR-opensea
cg00454447	female	0.317583	0.0461832	2.42092e-10	8.80939e-05	16	3728185	TRAP1	Body-shelf
cg17818220	female	-0.174123	0.0253733	2.60238e-10	9.4697e-05	7	28725466	CREB5	Body-opensea
cg02291164	female	-0.249021	0.0363318	2.71648e-10	9.88488e-05	14	59296302		IGR-opensea
cg24640577	female	0.105096	0.0153366	2.73665e-10	9.95828e-05	1	246939216		IGR-opensea
cg21724796	female	-0.0528794	0.00771831	2.75731e-10	0.000100335	17	8113904	AURKB	TSS200-island
cg24475275	female	0.136339	0.0199472	2.99483e-10	0.000108978	6	30644278	KIAA1949	3'UTR-shelf
cg24617370	female	-0.0284434	0.00416353	3.04813e-10	0.000110917	3	56717169	C3orf63	TSS200-island
cg08368094	female	0.292061	0.0428273	3.24131e-10	0.000117947	4	74286665	ALB	3'UTR-opensea
cg25743481	female	-0.251039	0.0368223	3.27338e-10	0.000119114	3	44803289	KIF15	1stExon-island
cg02537309	female	0.121682	0.0178795	3.47884e-10	0.00012659	16	30680763	FBRS	Body-opensea
cg06989253	female	0.0402023	0.00591641	3.67201e-10	0.000133619	1	45976998	PRDX1	3'UTR-opensea
cg08170679	female	0.311918	0.0459396	3.77293e-10	0.000137292	16	73025828	ZFHX3	5'UTR-opensea
cg13100600	female	-0.148334	0.0218571	3.83543e-10	0.000139566	1	958351	AGRN	Body-shelf
cg02464555	female	-0.232979	0.0343386	3.86997e-10	0.000140823	7	101922985	CUX1	Body-opensea
cg01530482	female	0.21993	0.0324494	4.01302e-10	0.000146028	11	1976432	MRPL23	Body-shore
cg22955595	female	0.156392	0.0230879	4.09274e-10	0.000148929	5	1052903	SLC12A7	Body-shore
cg26589665	female	0.267805	0.0395564	4.16769e-10	0.000151657	15	71623290	THSD4	Body-opensea
cg13776905	female	0.1845	0.0272651	4.23824e-10	0.000154223	17	65850328	BPTF	Body-opensea
cg07031551	female	-0.161598	0.0239089	4.41473e-10	0.000160646	11	72463331	ARAP1	5'UTR-island
cg26437203	female	-0.119356	0.0176624	4.44327e-10	0.000161684	5	2443031		IGR-opensea
cg02867102	female	-0.144846	0.0214571	4.60729e-10	0.000167653	17	62398693		IGR-opensea
cg03347934	female	0.0484412	0.00717961	4.68804e-10	0.000170591	5	131754928	C5orf56	5'UTR-opensea
cg09345320	female	-0.21059	0.0312575	4.9276e-10	0.000179309	11	62622179	SNORD30	TSS1500-shore
cg22839093	female	0.12897	0.0191474	4.96832e-10	0.00018079	8	144668199	EEF1D	Body-opensea
cg05150973	female	-0.077062	0.0114547	5.17595e-10	0.000188346	11	64622176	EHD1	Body-island
cg15644389	female	-0.105048	0.0156589	5.70069e-10	0.00020744	22	32341492	C22orf24	TSS200-shore
cg05656374	female	-0.320373	0.0477609	5.71961e-10	0.000208128	21	42733825	MX2	TSS200-opensea
cg00403579	female	-0.0790169	0.0117801	5.72536e-10	0.000208338	9	124533992	DAB2IP	Body-shore
cg14561362	female	-0.0866532	0.0129241	5.80983e-10	0.000211411	4	146461062	SMAD1	Body-opensea
cg08447571	female	-0.0663617	0.00990154	5.8874e-10	0.000214234	7	4743074	FOXK1	Body-opensea
cg02711479	female	0.277441	0.0414098	5.95551e-10	0.000216713	1	36849024	STK40	5'UTR-shelf
cg13920529	female	-0.131768	0.0196721	6.00632e-10	0.000218562	9	33402426	SUGT1P1	Body-opensea
cg14944696	female	-0.199438	0.0297974	6.16296e-10	0.000224262	3	115155686		IGR-opensea
cg09249675	female	0.254673	0.0381607	6.79944e-10	0.000247422	19	3401572	NFIC	Body-shelf
cg16054280	female	0.242572	0.0363752	6.97725e-10	0.000253892	3	122517974	DIRC2	Body-shelf
cg19787070	female	-0.199971	0.0300736	7.68891e-10	0.000279789	X	4381263		IGR-opensea
cg25504868	female	0.259904	0.0391187	7.90135e-10	0.000287519	11	567480		IGR-shore
cg11629889	female	0.208096	0.0313245	7.93035e-10	0.000288574	17	40839022	CNTNAP1	Body-island
cg06400255	female	-0.0959933	0.0144537	8.00289e-10	0.000291214	16	30063046	ALDOA	TSS1500-shore
cg22991936	female	0.210415	0.0316855	8.03191e-10	0.00029227	14	105255472	AKT1	Body-shelf
cg18805612	female	0.292291	0.0440159	8.03808e-10	0.000292495	12	120151550	MIR1178	TSS200-opensea
cg15138846	female	-0.312297	0.0470893	8.39305e-10	0.000305411	8	18067560	NAT1	TSS200-opensea
cg11466131	female	0.301167	0.0454383	8.56267e-10	0.000311584	22	37954778		IGR-shore
cg07143815	female	-0.136189	0.0205592	8.72788e-10	0.000317595	8	66474918		IGR-opensea
cg06380725	female	-0.144001	0.021746	8.82871e-10	0.000321264	6	111894647	TRAF3IP2	Body-opensea
cg23966361	female	0.0880282	0.0132971	8.91187e-10	0.00032429	17	80006606	RFNG	Body-shore
cg26878836	female	0.253704	0.0383475	9.10146e-10	0.000331189	11	68183902	LRP5	Body-shelf
cg02814054	female	-0.124999	0.0188986	9.18149e-10	0.000334102	19	18234911	MAST3	Body-island
cg19102271	female	-0.0331213	0.00501108	9.39552e-10	0.00034189	9	77567974	C9orf40	TSS200-island
cg24888989	female	-0.248627	0.0376438	9.62958e-10	0.000350407	3	44803291	KIF15	1stExon-island
cg16566899	female	0.0951237	0.014406	9.7103e-10	0.000353344	12	57579382	LRP1	Body-island
cg10078898	female	0.214053	0.0324392	9.93248e-10	0.000361429	14	21491045	NDRG2	Body-shore
cg01160557	female	-0.32772	0.0497265	1.03469e-09	0.000376508	20	44651777	SLC12A5	Body-shore
cg03358684	female	-0.0912401	0.0138486	1.04538e-09	0.000380399	11	119045407	NLRX1	Body-opensea
cg08737189	female	-0.198847	0.0301971	1.06358e-09	0.000387021	7	131223417	PODXL	Body-opensea
cg10692140	female	-0.096822	0.0147196	1.10287e-09	0.00040132	6	30496072		IGR-opensea
cg02905828	female	-0.271987	0.0413582	1.11061e-09	0.000404134	11	62622234	SNORD30	TSS1500-shore
cg04819180	female	-0.145868	0.022185	1.11789e-09	0.000406785	17	80829157	TBCD	Body-shore
cg08438529	female	-0.250535	0.0381105	1.12441e-09	0.000409157	16	1052939		IGR-shelf
cg20282429	female	0.242182	0.0368784	1.16379e-09	0.000423488	11	679841	DEAF1	Body-opensea
cg18473978	female	-0.159852	0.0243449	1.16922e-09	0.000425463	3	195615386	TNK2	Body-shore
cg05919312	female	0.221024	0.0336637	1.1721e-09	0.00042651	11	7694163	CYB5R2	5'UTR-shore
cg15580355	female	-0.171949	0.0261933	1.17811e-09	0.000428696	3	183003859	MCF2L2	Body-opensea
cg15302350	female	0.159784	0.0243873	1.25553e-09	0.000456869	11	68180760	LRP5	Body-shore
cg18047172	female	0.182611	0.027878	1.26537e-09	0.000460451	7	50670059	GRB10	Body-opensea
cg04065151	female	-0.0710339	0.0108553	1.30839e-09	0.000476104	12	53682969	ESPL1	Body-opensea
cg26435670	female	-0.140815	0.0215211	1.31236e-09	0.000477549	10	88515340	BMPR1A	TSS1500-shore
cg18195165	female	-0.0704516	0.0107808	1.3675e-09	0.000497615	7	5549570	FBXL18	Body-shelf
cg21008808	female	-0.0673864	0.0103149	1.38079e-09	0.000502449	11	134093497	VPS26B	TSS1500-shore
cg25582353	female	0.298449	0.0457104	1.40744e-09	0.000512147	17	37883239	ERBB2	Body-shelf
cg12176793	female	-0.267043	0.0409015	1.40882e-09	0.000512651	8	90624127		IGR-opensea
cg13213165	female	0.240296	0.0368418	1.45592e-09	0.000529789	1	67204147	SGIP1	Body-opensea
cg26772172	female	-0.145901	0.0223758	1.46993e-09	0.000534887	17	77474395	HRNBP3	5'UTR-opensea
cg22193726	female	-0.118046	0.0181283	1.53564e-09	0.000558799	12	112857626	PTPN11	Body-shore
cg14295924	female	-0.270715	0.0415851	1.54959e-09	0.000563875	11	1990900		IGR-island
cg06094085	female	0.212308	0.0326194	1.55947e-09	0.000567469	16	2136269	TSC2	Body-shore
cg19718686	female	-0.216832	0.0333314	1.58534e-09	0.000576883	12	115141551		IGR-shelf
cg10063227	female	-0.113459	0.0174629	1.6515e-09	0.000600959	X	50211229	DGKK	Body-shore
cg07573965	female	0.301355	0.046386	1.65547e-09	0.000602402	22	35656596	HMGXB4	5'UTR-shelf
cg14254966	female	0.139946	0.0215552	1.69075e-09	0.000615241	9	136743443	VAV2	Body-opensea
cg26414000	female	0.269758	0.041586	1.73963e-09	0.000633029	1	85721327	C1orf52	Body-shelf
cg25461801	female	0.179402	0.0276689	1.76464e-09	0.000642128	13	100630316		IGR-shore
cg18788664	female	0.268416	0.0414225	1.79965e-09	0.000654868	1	221068171		IGR-island
cg08369295	female	0.180743	0.0278931	1.80065e-09	0.000655231	22	25759225	LRP5L	TSS1500-shelf
cg26577252	female	-0.349946	0.0540082	1.80382e-09	0.000656386	15	99212332	IGF1R	Body-opensea
cg25225070	female	-0.0927219	0.0143134	1.81764e-09	0.000661414	11	9587743		IGR-opensea
cg20222695	female	0.173205	0.0267534	1.85282e-09	0.000674217	12	133323749	ANKLE2	Body-opensea
cg11679673	female	-0.0873522	0.0135064	1.91529e-09	0.000696947	17	55015826	COIL	3'UTR-opensea
cg06797253	female	-0.165931	0.0256592	1.92223e-09	0.000699473	22	45022475		IGR-opensea
cg11150353	female	0.200025	0.0309506	1.96126e-09	0.000713675	1	9308197	H6PD	Body-opensea
cg17032848	female	-0.108307	0.0167844	2.06016e-09	0.000749663	2	238647755	LRRFIP1	Body-shelf
cg13306921	female	0.246097	0.0381424	2.06808e-09	0.000752544	1	54863529	SSBP3	Body-opensea
cg21884122	female	0.161291	0.025	2.07232e-09	0.000754088	14	21533871		IGR-shelf
cg08929626	female	0.3179	0.0493042	2.11333e-09	0.000769011	8	1896553	ARHGEF10	Body-shelf
cg10057218	female	0.27753	0.043095	2.19648e-09	0.000799267	17	38074149	GSDMB	TSS1500-opensea
cg17296729	female	-0.037441	0.00581385	2.19651e-09	0.00079928	18	55469509		IGR-island
cg23575603	female	0.0933867	0.0145031	2.2059e-09	0.000802696	13	50707753		IGR-island
cg05106269	female	-0.0927272	0.0144011	2.20828e-09	0.000803562	19	10381393	ICAM1	TSS200-island
cg17453767	female	0.184853	0.0287107	2.21282e-09	0.000805213	4	144277796	GAB1	Body-opensea
cg11724984	female	-0.142866	0.0222108	2.28196e-09	0.000830374	12	121890864	KDM2B	Body-island
cg04592144	female	-0.298683	0.0464493	2.30459e-09	0.000838606	5	172899456		IGR-opensea
cg04904815	female	-0.0924802	0.0143823	2.30662e-09	0.000839348	6	41010654	TSPO2	5'UTR-opensea
cg14223485	female	-0.0874459	0.0136073	2.34968e-09	0.000855015	9	34454428	C9orf25	Body-shelf
cg07804577	female	0.19174	0.0298384	2.355e-09	0.000856953	17	1645462	SERPINF2	TSS1500-opensea
cg00341060	female	-0.111837	0.0174063	2.36499e-09	0.000860586	1	8377787		IGR-island
cg01324115	female	-0.140251	0.0218714	2.51708e-09	0.000915932	19	42722189	DEDD2	TSS1500-shore
cg25149428	female	-0.0233904	0.00364976	2.56491e-09	0.000933335	3	50653397	MAPKAPK3	TSS1500-shore
cg06210783	female	-0.128773	0.0200972	2.58053e-09	0.000939019	11	68205335	LRP5	Body-shore
cg09602020	female	0.228092	0.0356564	2.71981e-09	0.000989699	16	29188796		IGR-opensea
cg05296180	female	0.254606	0.039815	2.74994e-09	0.00100067	14	21161619	ANG	5'UTR-opensea
cg22212560	female	-0.0864684	0.0135458	2.90852e-09	0.00105837	11	65175482	FRMD8	Body-shelf
cg05946971	female	-0.0249366	0.0039093	2.97594e-09	0.0010829	22	32341328	C22orf24	1stExon-shore
cg13184448	female	-0.136423	0.0213887	2.98322e-09	0.00108555	2	238647857	LRRFIP1	Body-shelf
cg13853813	female	0.197032	0.0308995	3.00936e-09	0.00109506	9	97844901	C9orf3	Body-shelf
cg18653372	female	0.329334	0.0516496	3.01249e-09	0.0010962	6	112647973		IGR-opensea
cg02517524	female	-0.0278898	0.00437816	3.10507e-09	0.00112989	22	23412814	RTDR1	Body-island
cg23606421	female	-0.219956	0.0345426	3.14446e-09	0.00114422	9	140330621	ENTPD8	Body-island
cg18113181	female	0.280664	0.0440979	3.19313e-09	0.00116194	3	66004205	MAGI1	Body-opensea
cg23131909	female	0.270334	0.0424767	3.19719e-09	0.00116341	2	219267443	MIR26B	Body-shore
cg03917020	female	0.247544	0.0389277	3.28089e-09	0.00119387	16	85285139		IGR-opensea
cg03956606	female	0.233516	0.0367248	3.28945e-09	0.00119698	1	11249057	MTOR	Body-opensea
cg25595388	female	-0.175803	0.0276749	3.39057e-09	0.00123378	5	2684004		IGR-opensea
cg10469791	female	-0.132027	0.0207897	3.42145e-09	0.00124502	4	42895240	GRXCR1	TSS200-opensea
cg07507257	female	0.112591	0.0177292	3.42152e-09	0.00124504	18	21112105	NPC1	3'UTR-opensea
cg14186336	female	-0.112575	0.0177817	3.76982e-09	0.00137179	9	124045139	GSN	5'UTR-opensea
cg19521693	female	-0.14354	0.0226845	3.83156e-09	0.00139425	19	54468577	CACNG8	Body-shore
cg03781748	female	-0.199437	0.0315313	3.8816e-09	0.00141246	10	32229887		IGR-opensea
cg06735243	female	-0.153325	0.0242432	3.89305e-09	0.00141663	2	233766658	NGEF	Body-shore
cg00741410	female	-0.0792712	0.0125347	3.89865e-09	0.00141866	1	6615354	TAS1R1	TSS200-shore
cg01449469	female	0.234039	0.0370123	3.91534e-09	0.00142474	6	30644681	KIAA1949	3'UTR-shelf
cg03010887	female	0.227556	0.0359931	3.9363e-09	0.00143236	16	85600235		IGR-opensea
cg11400143	female	0.233499	0.0369612	4.03072e-09	0.00146672	6	7214480	RREB1	Body-opensea
cg23246769	female	0.249984	0.0396045	4.13924e-09	0.00150621	12	124461296	ZNF664	5'UTR-shelf
cg10798682	female	-0.0919319	0.0145735	4.2183e-09	0.00153498	3	125820372	SLC41A3	5'UTR-opensea
cg00435064	female	-0.170678	0.0270829	4.34673e-09	0.00158171	17	76374256	PGS1	TSS1500-shore
cg20543651	female	-0.179772	0.0285267	4.35073e-09	0.00158317	8	55918395		IGR-opensea
cg17846122	female	0.231908	0.0368273	4.45294e-09	0.00162036	17	64351144	PRKCA	Body-opensea
cg25533247	female	-0.261701	0.041568	4.48448e-09	0.00163184	19	15530630	AKAP8L	TSS1500-shore
cg24721350	female	0.0704483	0.0111905	4.49235e-09	0.0016347	7	75511202	RHBDD2	Body-shelf
cg01962750	female	0.129291	0.0205442	4.5381e-09	0.00165135	2	8298983		IGR-opensea
cg23843398	female	0.121194	0.0192607	4.56158e-09	0.00165989	2	242684072	D2HGDH	Body-opensea
cg20782252	female	-0.0713177	0.0113375	4.60357e-09	0.00167517	7	2153774	MAD1L1	Body-shore
cg24603926	female	0.270829	0.043062	4.62901e-09	0.00168443	12	120151679	MIR1178	TSS200-opensea
cg27292431	female	0.289824	0.0460838	4.63407e-09	0.00168627	6	160543261	SLC22A1	1stExon-opensea
cg24232092	female	0.167698	0.026689	4.76507e-09	0.00173394	4	1364344	KIAA1530	Body-island
cg18322448	female	-0.0296354	0.00471775	4.80585e-09	0.00174878	19	4910276	UHRF1	5'UTR-shore
cg07372034	female	-0.288755	0.0459765	4.83391e-09	0.00175899	22	48486164		IGR-opensea
cg01569827	female	0.323806	0.0515694	4.86826e-09	0.00177149	3	133499158		IGR-shelf
cg06802985	female	-0.235093	0.0374457	4.88792e-09	0.00177865	5	179341359		IGR-opensea
cg19497511	female	-0.103823	0.0165371	4.88895e-09	0.00177902	2	238609807	LRRFIP1	Body-opensea
cg05708550	female	-0.0767617	0.0122288	4.91451e-09	0.00178832	5	137688227	KDM3B	TSS200-island
cg25377915	female	-0.238013	0.0379193	4.92161e-09	0.00179091	8	95127949		IGR-opensea
cg13567156	female	0.280189	0.0446715	5.03471e-09	0.00183206	9	137111412		IGR-opensea
cg09329705	female	-0.0468648	0.00747726	5.14883e-09	0.00187359	19	4909474	UHRF1	TSS200-island
cg03568041	female	-0.152524	0.0243559	5.28588e-09	0.00192346	16	1047623		IGR-island
cg09852389	female	-0.136857	0.0218592	5.32389e-09	0.00193729	4	4397942	D4S234E	Body-opensea
cg13651876	female	0.059855	0.00956887	5.47369e-09	0.0019918	9	37434131	GRHPR	Body-opensea
cg19265143	female	-0.113214	0.0181011	5.49037e-09	0.00199787	1	28907637	SNHG12	Body-shore
cg15610488	female	-0.0752085	0.012031	5.58048e-09	0.00203066	13	113492103	ATP11A	Body-shore
cg17001958	female	0.17997	0.0288013	5.65123e-09	0.0020564	7	1191882		IGR-opensea
cg25649039	female	0.25134	0.040248	5.75988e-09	0.00209594	17	64335475	PRKCA	Body-opensea
cg23672425	female	0.235289	0.0376888	5.812e-09	0.0021149	1	11249037	MTOR	Body-opensea
cg21049397	female	-0.265363	0.0425586	6.03572e-09	0.00219631	12	25611175		IGR-opensea
cg12532001	female	-0.0364926	0.00585656	6.16061e-09	0.00224176	13	50654671	DLEU2	Body-shore
cg18232772	female	0.0878698	0.0141023	6.16542e-09	0.00224351	22	50165512		IGR-island
cg17183215	female	0.205164	0.0329285	6.17433e-09	0.00224675	1	2200984	SKI	Body-opensea
cg01395254	female	-0.203483	0.0326704	6.24294e-09	0.00227172	2	2336428	MYT1L	TSS1500-opensea
cg09175325	female	-0.102565	0.0164715	6.29006e-09	0.00228886	17	78800199	RPTOR	Body-shore
cg15495091	female	-0.076035	0.0122118	6.30384e-09	0.00229388	13	113491819	ATP11A	Body-shore
cg20729768	female	-0.12718	0.0204344	6.38368e-09	0.00232293	3	10399379	ATP2B2	Body-shore
cg01263574	female	0.300134	0.0482555	6.51375e-09	0.00237026	9	136390861	TMEM8C	TSS1500-opensea
cg23239612	female	-0.104322	0.0167842	6.64945e-09	0.00241964	5	137549391	CDC23	TSS1500-opensea
cg27548256	female	0.224087	0.0360713	6.75159e-09	0.00245681	19	39217070	ACTN4	Body-shore
cg04741284	female	-0.259297	0.0417468	6.78993e-09	0.00247076	20	56324226		IGR-island
cg02597246	female	-0.117864	0.0189783	6.81502e-09	0.00247989	16	81711959	CMIP	Body-island
cg06804091	female	-0.254293	0.0409577	6.87388e-09	0.00250131	7	2563478	LFNG	Body-shore
cg17260180	female	0.223298	0.0359706	6.90361e-09	0.00251213	17	6610104	SLC13A5	Body-opensea
cg00446003	female	0.353031	0.0568902	6.98209e-09	0.00254069	19	2135687	AP3D1	Body-shore
cg25847771	female	-0.0329678	0.00531411	7.03899e-09	0.00256139	15	64752581		IGR-shore
cg17217096	female	0.267309	0.043114	7.16951e-09	0.00260888	17	48626642	SPATA20	Body-shore
cg01019355	female	0.301305	0.048606	7.20905e-09	0.00262327	13	27712255	USP12	Body-opensea
cg16751493	female	-0.128608	0.0207693	7.44977e-09	0.00271087	2	242101289	PPP1R7	Body-opensea
cg09121269	female	-0.111377	0.0180154	7.8185e-09	0.00284504	14	74181427	PNMA1	TSS1500-shore
cg16711650	female	-0.265763	0.0429892	7.82642e-09	0.00284793	1	61039539		IGR-opensea
cg12516954	female	-0.0874017	0.0141438	7.92627e-09	0.00288426	5	134714262	H2AFY	Body-opensea
cg23729763	female	-0.105865	0.0171407	8.05268e-09	0.00293026	11	129991544	APLP2	Body-shore
cg02983090	female	-0.349004	0.0565131	8.07732e-09	0.00293922	16	27437892	IL21R	TSS1500-opensea
cg26055718	female	0.253954	0.0411308	8.12948e-09	0.0029582	10	65125687	JMJD1C	Body-opensea
cg02531277	female	0.212107	0.034355	8.14323e-09	0.00296321	7	101558597	CUX1	Body-shore
cg13481374	female	-0.0557998	0.00904105	8.22839e-09	0.0029942	9	34318769	KIF24	5'UTR-island
cg03138446	female	-0.0527101	0.00854091	8.24204e-09	0.00299916	1	153746880	SLC27A3	TSS1500-shore
cg19423081	female	0.249007	0.0403503	8.25627e-09	0.00300434	17	79057830	BAIAP2	Body-opensea
cg07086179	female	-0.0964658	0.0156457	8.47963e-09	0.00308562	16	67979677	SLC12A4	Body-opensea
cg05210615	female	-0.177709	0.028835	8.5912e-09	0.00312622	17	47512894		IGR-opensea
cg13440947	female	0.195346	0.0317323	8.88521e-09	0.00323321	10	117997713	GFRA1	Body-opensea
cg06208834	female	0.142257	0.0231167	8.97971e-09	0.00326759	1	243656201	SDCCAG8	Body-shelf
cg07698804	female	-0.139816	0.0227314	9.11662e-09	0.00331741	17	80829309	TBCD	Body-shore
cg08855504	female	0.267712	0.0435303	9.15067e-09	0.0033298	4	52924627	SPATA18	Body-opensea
cg05948372	female	-0.270519	0.0439874	9.15476e-09	0.00333129	18	19283268	ABHD3	Body-shore
cg05935052	female	-0.0469928	0.0076413	9.15826e-09	0.00333256	1	209381144		IGR-opensea
cg19919217	female	0.190569	0.0309907	9.18535e-09	0.00334242	17	38248105	THRA	Body-shore
cg24304264	female	0.142256	0.0231359	9.20852e-09	0.00335085	6	33424075	ZBTB9	Body-shore
cg09309024	female	-0.0952716	0.015507	9.43239e-09	0.00343232	16	29837267	MVP	5'UTR-opensea
cg17278960	female	0.293889	0.0478815	9.7086e-09	0.00353283	1	59775908	FGGY	5'UTR-opensea
cg25439632	female	-0.226647	0.0369287	9.72777e-09	0.0035398	8	49892209		IGR-shore
cg22105534	female	0.285245	0.0464958	9.85088e-09	0.0035846	6	30308653	TRIM39	Body-opensea
cg13227806	female	-0.191093	0.0311511	9.87322e-09	0.00359272	3	113811946		IGR-opensea
cg12581970	female	0.0436001	0.00710837	9.90947e-09	0.00360592	1	220959227	MOSC1	TSS1500-shore
cg11024165	female	0.249397	0.0406682	9.96495e-09	0.00362611	7	94957055		IGR-shelf
cg14174320	female	-0.0835378	0.0136259	1.00457e-08	0.00365547	11	66630151	PC	Body-shore
cg04596071	female	-0.0778083	0.0127043	1.0355e-08	0.00376803	7	2155899	MAD1L1	Body-shore
cg02709052	female	0.201601	0.0329272	1.04535e-08	0.00380389	11	86748071	TMEM135	TSS1500-shore
cg01142668	female	0.316938	0.0517721	1.04963e-08	0.00381947	16	2086846	SLC9A3R2	Body-island
cg06419432	female	-0.221437	0.0361772	1.05411e-08	0.00383578	17	25707535		IGR-opensea
cg13521941	female	-0.199849	0.0326608	1.06422e-08	0.00387256	9	140330627	ENTPD8	Body-island
cg27464846	female	-0.185383	0.0303041	1.07211e-08	0.00390124	16	88268600		IGR-shore
cg16696234	female	-0.123693	0.0202204	1.07286e-08	0.00390397	1	23697297	C1orf213	3'UTR-shore
cg15010544	female	-0.0913496	0.0149349	1.07677e-08	0.00391823	3	195613641	TNK2	Body-island
cg08085909	female	0.247689	0.040501	1.08148e-08	0.00393535	14	53390796	FERMT2	Body-opensea
cg16550651	female	0.271298	0.0443684	1.08653e-08	0.00395372	17	40268381	KAT2A	Body-shore
cg24858591	female	-0.0766842	0.0125425	1.09037e-08	0.0039677	3	44803638	KIAA1143	TSS1500-shore
cg02072495	female	-0.378479	0.0619303	1.10401e-08	0.00401735	15	60689285	ANXA2	5'UTR-shore
cg12537437	female	0.301145	0.0493172	1.13166e-08	0.00411794	11	74871202	SLCO2B1	Body-opensea
cg26005086	female	-0.0645486	0.0105807	1.16324e-08	0.00423288	20	10619892	JAG1	3'UTR-opensea
cg14096180	female	-0.0356084	0.00583884	1.17492e-08	0.00427539	11	67141628	CLCF1	1stExon-shore
cg05647756	female	0.112144	0.0183996	1.1956e-08	0.00435063	17	73805997	UNK	Body-opensea
cg06419959	female	-0.0298958	0.00490619	1.20406e-08	0.00438142	9	140354043	NELF	TSS1500-island
cg26919347	female	0.268052	0.0439958	1.20885e-08	0.00439884	4	77231677	STBD1	3'UTR-shelf
cg15686949	female	-0.171975	0.0282333	1.21723e-08	0.00442931	5	32532223		IGR-opensea
cg18358952	female	0.0443064	0.00727711	1.23369e-08	0.00448924	14	103468050	CDC42BPB	Body-opensea
cg27444899	female	0.0795011	0.0130596	1.23905e-08	0.00450873	16	565493	RAB11FIP3	Body-island
cg06071746	female	-0.125176	0.0205626	1.23913e-08	0.00450901	17	57297518	GDPD1	TSS1500-shore
cg12229632	female	0.213416	0.0350671	1.24887e-08	0.00454446	17	2607906	KIAA0664	5'UTR-island
cg17053854	female	-0.0864974	0.0142133	1.25059e-08	0.00455074	17	75463180	2024-09-09	Body-opensea
cg05923101	female	0.32042	0.0526524	1.251e-08	0.00455221	21	45876770	LRRC3	Body-island
cg10541534	female	-0.0691205	0.0113637	1.26948e-08	0.00461946	4	140429995	SETD7	3'UTR-opensea
cg09548780	female	0.344608	0.0566929	1.29458e-08	0.0047108	2	218770270	TNS1	5'UTR-opensea
cg22659267	female	0.0212501	0.00349652	1.30087e-08	0.0047337	4	3517885	LRPAP1	Body-shore
cg24304714	female	-0.157661	0.0259463	1.30746e-08	0.00475768	1	152779374	LCE1C	TSS1500-opensea
cg19265913	female	0.196065	0.0322672	1.30837e-08	0.00476097	10	81154181	ZCCHC24	Body-opensea
cg02542218	female	-0.133258	0.0219346	1.31527e-08	0.00478608	7	131630566		IGR-shore
cg17214479	female	0.293509	0.0483189	1.3204e-08	0.00480476	13	32560449		IGR-opensea
cg15542924	female	0.190766	0.0314105	1.32744e-08	0.00483038	6	163959346	QKI	Body-opensea
cg23585420	female	-0.161307	0.0265737	1.3477e-08	0.00490411	14	104668772		IGR-opensea
cg13231302	female	0.177106	0.0292102	1.39424e-08	0.00507343	14	103467798	CDC42BPB	Body-opensea
cg14570632	female	0.156685	0.0258734	1.44444e-08	0.00525611	9	137243592	RXRA	Body-opensea
cg03983270	female	-0.157403	0.0260041	1.46437e-08	0.00532863	16	81731249	CMIP	Body-opensea
cg01361263	female	0.27483	0.04542	1.47956e-08	0.00538393	3	58051763	FLNB	Body-opensea
cg02532341	female	-0.142687	0.0235839	1.4843e-08	0.00540117	3	10399439	ATP2B2	Body-shore
cg26429629	female	-0.147768	0.0244561	1.54274e-08	0.00561383	5	169758391	LOC257358	TSS200-opensea
cg26361533	female	-0.272616	0.0451299	1.55399e-08	0.00565476	12	2445561	CACNA1C	Body-opensea
cg20168964	female	-0.144353	0.0239086	1.57654e-08	0.0057368	12	130333393	TMEM132D	Body-opensea
cg04244171	female	-0.0722981	0.0119767	1.58526e-08	0.00576853	3	43331949	SNRK	5'UTR-shelf
cg16910911	female	-0.0188316	0.00312075	1.60238e-08	0.00583082	7	102037347	PRKRIP1	Body-shore
cg14516287	female	-0.183666	0.030438	1.60405e-08	0.00583691	9	119987070	ASTN2	Body-opensea
cg06933824	female	0.120099	0.0199152	1.63232e-08	0.00593977	5	172110579	NEURL1B	Body-island
cg11967592	female	-0.115509	0.0191553	1.63527e-08	0.00595051	7	28725406	CREB5	Body-opensea
cg08373169	female	0.196318	0.0325658	1.64908e-08	0.00600077	6	75934318		IGR-opensea
cg25710107	female	0.203266	0.033726	1.66023e-08	0.00604135	13	101187390	A2LD1	TSS1500-shelf
cg00336946	female	0.393849	0.0653784	1.68298e-08	0.00612412	13	101186274	A2LD1	TSS1500-shore
cg05210671	female	-0.208796	0.0346605	1.68383e-08	0.00612722	14	104787388		IGR-opensea
cg24377133	female	-0.110876	0.0184338	1.7603e-08	0.0064055	8	144170375		IGR-shelf
cg26775866	female	-0.22842	0.0379859	1.77338e-08	0.00645309	5	159849193	PTTG1	5'UTR-shore
cg23195547	female	-0.112528	0.0187148	1.7779e-08	0.00646953	11	8740646	ST5	Body-opensea
cg26720452	female	-0.125302	0.0208408	1.78157e-08	0.00648287	8	57472776		IGR-opensea
cg07670266	female	0.307434	0.0511367	1.78423e-08	0.00649258	16	2087377	SLC9A3R2	Body-shore
cg00318436	female	0.202666	0.0337146	1.79099e-08	0.00651716	16	67696181	PARD6A	Body-shore
cg25764534	female	-0.0855251	0.0142362	1.82257e-08	0.00663209	8	22485721	BIN3	Body-opensea
cg01950958	female	-0.129552	0.0215676	1.82957e-08	0.00665754	1	145589783	NUDT17	TSS1500-shore
cg23683146	female	0.228961	0.0381194	1.83272e-08	0.006669	12	47057850		IGR-opensea
cg03101580	female	-0.0828135	0.0137877	1.83343e-08	0.0066716	11	1302893	TOLLIP	Body-island
cg14842820	female	0.24641	0.0410378	1.8501e-08	0.00673226	5	172013425		IGR-opensea
cg05840553	female	-0.236761	0.0394717	1.90609e-08	0.00693598	9	130212635	RPL12	Body-shore
cg07085895	female	-0.107514	0.0179264	1.91317e-08	0.00696175	11	19262124	E2F8	1stExon-island
cg23173806	female	0.194968	0.0325222	1.937e-08	0.00704847	6	30299968	TRIM39	Body-opensea
cg12271079	female	0.288767	0.0481843	1.9551e-08	0.00711433	10	117997745	GFRA1	Body-opensea
cg18102633	female	-0.196997	0.0328742	1.96002e-08	0.00713225	19	17487776	PLVAP	1stExon-shore
cg22816294	female	-0.179522	0.0300027	2.04598e-08	0.00744503	14	22458634		IGR-opensea
cg12514868	female	-0.0665831	0.0111289	2.05212e-08	0.00746736	4	2491659	RNF4	5'UTR-opensea
cg07181257	female	0.302281	0.0505388	2.0691e-08	0.00752917	1	27876033	AHDC1	Body-shore
cg22751264	female	0.107224	0.0179536	2.15907e-08	0.00785656	10	5693432	ASB13	Body-opensea
cg26096338	female	0.327175	0.054793	2.17143e-08	0.00790153	5	98129982	RGMB	3'UTR-opensea
cg27033919	female	-0.173602	0.0290828	2.19104e-08	0.0079729	11	62622173	SNORD30	TSS1500-shore
cg06516476	female	-0.13216	0.0221499	2.21858e-08	0.00807311	6	86174584	NT5E	Body-opensea
cg16988810	female	-0.185992	0.0311777	2.22993e-08	0.0081144	6	31762650	VARS	Body-shore
cg26808293	female	-0.187872	0.0315075	2.25993e-08	0.00822356	16	3072207	TNFRSF12A	3'UTR-shore
cg24361256	female	0.157527	0.0264259	2.27825e-08	0.00829025	22	50637945	SELO	TSS1500-shore
cg09571345	female	-0.116502	0.0195447	2.28164e-08	0.00830258	10	26931926	LOC731789	TSS200-opensea
cg12664119	female	0.151367	0.0254081	2.31842e-08	0.00843641	1	119532352	TBX15	TSS200-shore
cg26129110	female	-0.158907	0.0266813	2.33722e-08	0.00850483	5	7619983	ADCY2	Body-opensea
cg00069261	female	-0.0856028	0.014376	2.35027e-08	0.00855231	16	22386531	CDR2	TSS1500-shore
cg21860675	female	-0.118417	0.0198918	2.36739e-08	0.0086146	3	71586357	FOXP1	5'UTR-opensea
cg21617903	female	-0.0967325	0.0162506	2.37338e-08	0.00863641	3	11599713	VGLL4	3'UTR-opensea
cg02411582	female	0.22734	0.0382079	2.4014e-08	0.00873835	16	27232615	JMJD5	3'UTR-opensea
cg12992443	female	-0.0985226	0.0165588	2.40373e-08	0.00874683	20	35093928	DLGAP4	Body-shelf
cg04073934	female	-0.0664787	0.011183	2.46516e-08	0.00897037	4	3372272	RGS12	Body-shelf
cg08216099	female	-0.256687	0.043193	2.48659e-08	0.00904834	2	1725761	PXDN	Body-opensea
cg09743500	female	-0.0899719	0.0151471	2.52154e-08	0.00917551	2	238644037	LRRFIP1	Body-island
cg09476997	female	0.18136	0.0305464	2.55411e-08	0.00929406	16	2087932	SLC9A3R2	Body-shore
cg08170637	female	0.148892	0.0250866	2.57935e-08	0.0093859	17	79988088	RAC3	TSS1500-island
cg17537493	female	-0.0877143	0.0147847	2.60868e-08	0.00949264	11	65172538	FRMD8	Body-island
cg26509250	female	0.18266	0.0307938	2.62168e-08	0.00953991	2	134884342		IGR-opensea
cg25214561	female	-0.142859	0.0240868	2.63066e-08	0.0095726	3	11494984	ATG7	Body-opensea
cg02289739	female	0.207688	0.0350255	2.64805e-08	0.00963588	7	131156554	MKLN1	Body-opensea
cg08846327	female	-0.103254	0.0174132	2.64835e-08	0.00963699	5	14359614	TRIO	Body-opensea
cg03607117	female	-0.0375022	0.00632511	2.65486e-08	0.00966066	3	53080440	SFMBT1	TSS1500-island
cg06033579	female	0.257803	0.0434902	2.67082e-08	0.00971874	1	12662841	DHRS3	Body-opensea
cg03378797	female	0.0967848	0.0163306	2.6866e-08	0.00977618	17	27493467	MYO18A	Body-island
cg21783599	female	0.235356	0.0397346	2.73054e-08	0.00993604	6	30881152	VARS2	TSS1500-shore
cg08781340	female	0.136079	0.0229778	2.74418e-08	0.00998568	16	85285111		IGR-opensea
cg06429138	female	-0.0746007	0.0125994	2.76006e-08	0.0100435	11	72860376		IGR-opensea
cg10162914	female	0.240626	0.0406501	2.77997e-08	0.0101159	4	170943016	MFAP3L	5'UTR-shelf
cg27080119	female	-0.216197	0.0365317	2.79844e-08	0.0101831	4	120987409	MAD2L1	Body-shore
cg01566199	female	0.23587	0.0398562	2.79894e-08	0.010185	1	26197239	PAQR7	1stExon-opensea
cg25985504	female	0.267043	0.0451328	2.81511e-08	0.0102438	15	96303955		IGR-opensea
cg01687997	female	0.257497	0.0435229	2.82111e-08	0.0102656	7	1083072	C7orf50	Body-shore
cg17518550	female	-0.152584	0.0257902	2.82152e-08	0.0102671	1	247712383	C1orf150	TSS200-opensea
cg10334928	female	0.307746	0.0520529	2.87805e-08	0.0104728	14	81865007	STON2	TSS200-opensea
cg11155222	female	0.365942	0.0619038	2.88787e-08	0.0105086	6	128602411	PTPRK	Body-opensea
cg12352038	female	-0.0417846	0.00706887	2.89327e-08	0.0105282	20	62114621		IGR-shelf
cg12027899	female	0.19006	0.0321634	2.91945e-08	0.0106235	11	58385947	ZFP91	3'UTR-opensea
cg27292113	female	-0.0250328	0.00423638	2.92186e-08	0.0106322	17	3627709	ITGAE	Body-island
cg05938285	female	-0.0265447	0.00449268	2.92987e-08	0.0106614	3	196695938	PIGZ	TSS1500-island
cg02471028	female	-0.101114	0.0171201	2.96179e-08	0.0107775	4	1203653	LOC100130872	TSS1500-shore
cg09313745	female	0.262504	0.0444626	2.99364e-08	0.0108934	12	3373666	TSPAN9	Body-opensea
cg12355887	female	-0.127847	0.0216613	3.02017e-08	0.01099	5	172305927	ERGIC1	Body-opensea
cg15364131	female	-0.195897	0.0331926	3.02386e-08	0.0110034	22	32341622	C22orf24	TSS1500-shore
cg03157150	female	0.116815	0.0198157	3.12243e-08	0.0113621	16	4738680	MGRN1	3'UTR-opensea
cg12067547	female	0.151293	0.0256739	3.15586e-08	0.0114837	19	46385115		IGR-shore
cg12946671	female	0.216497	0.0367429	3.1655e-08	0.0115188	15	61523908		IGR-shelf
cg05938409	female	0.359122	0.0609508	3.16873e-08	0.0115306	16	85290060		IGR-opensea
cg07601536	female	0.156489	0.0265603	3.17115e-08	0.0115394	6	7248983	RREB1	Body-shore
cg05361415	female	-0.0971974	0.0165019	3.19756e-08	0.0116355	3	11610138	VGLL4	Body-island
cg25887619	female	0.202349	0.0343673	3.23232e-08	0.011762	7	101558435	CUX1	Body-shore
cg19815813	female	0.223995	0.0380809	3.32151e-08	0.0120865	13	101186116	A2LD1	TSS200-shore
cg01712700	female	0.239537	0.0407465	3.37528e-08	0.0122822	2	241535695	CAPN10	Body-island
cg10569694	female	-0.0434514	0.00739136	3.37587e-08	0.0122843	7	5013509	RNF216L	TSS200-island
cg03858720	female	0.254325	0.0432826	3.42027e-08	0.0124459	17	21194718	MAP2K3	Body-opensea
cg07155724	female	0.175823	0.0299315	3.44875e-08	0.0125495	14	105165730	INF2	5'UTR-shore
cg18016138	female	0.287262	0.0489097	3.46328e-08	0.0126024	11	278421	NLRP6	TSS200-shore
cg13892570	female	-0.342614	0.0583647	3.51421e-08	0.0127877	1	159893182	TAGLN2	5'UTR-shore
cg12726213	female	0.271302	0.046247	3.57944e-08	0.0130251	8	87368021	WWP1	5'UTR-opensea
cg09293816	female	-0.114989	0.0196117	3.63197e-08	0.0132162	19	50015532	FCGRT	TSS200-shore
cg07274716	female	0.197813	0.0337727	3.73903e-08	0.0136058	5	134363973	PITX1	3'UTR-island
cg12614090	female	-0.0484557	0.00827662	3.78609e-08	0.013777	10	116444240	ABLIM1	1stExon-opensea
cg12393104	female	0.248105	0.042399	3.83775e-08	0.013965	22	20233758	RTN4R	Body-shelf
cg16205352	female	0.227478	0.0388762	3.84383e-08	0.0139872	12	49688176	PRPH	TSS1500-shore
cg05333149	female	0.121228	0.0207184	3.84645e-08	0.0139967	22	29660173	RHBDD3	Body-shelf
cg07964975	female	0.34517	0.0590002	3.86246e-08	0.014055	7	11292672		IGR-opensea
cg19043800	female	-0.238088	0.0407122	3.90385e-08	0.0142056	13	37702050		IGR-opensea
cg06055845	female	0.232267	0.0397169	3.90402e-08	0.0142062	19	40788787	MIR641	TSS1500-shore
cg07539709	female	-0.0686246	0.0117363	3.92e-08	0.0142643	17	80545454	FOXK2	Body-island
cg08589214	female	0.291438	0.0498665	3.97324e-08	0.0144581	2	241535685	CAPN10	Body-island
cg25598370	female	0.249112	0.0426309	3.99023e-08	0.0145199	6	116427195	NT5DC1	Body-opensea
cg03703733	female	0.216985	0.0371482	4.03595e-08	0.0146863	6	168147981		IGR-opensea
cg06547285	female	-0.11738	0.0200963	4.03954e-08	0.0146993	12	47630263	FAM113B	3'UTR-shore
cg04214520	female	-0.0980927	0.0168176	4.19811e-08	0.0152763	3	195615359	TNK2	Body-shore
cg13077865	female	-0.25891	0.0444119	4.25841e-08	0.0154958	8	105655901		IGR-opensea
cg13224139	female	0.387492	0.0664833	4.2852e-08	0.0155932	13	112901929		IGR-opensea
cg16928044	female	-0.139587	0.0239531	4.30344e-08	0.0156596	1	145589929	NUDT17	TSS1500-shore
cg21522254	female	-0.025087	0.00430818	4.39402e-08	0.0159892	12	27175280	MED21	TSS1500-shore
cg18973863	female	-0.169424	0.0291004	4.41617e-08	0.0160698	13	97794113		IGR-opensea
cg06389444	female	-0.135954	0.0233604	4.46202e-08	0.0162367	17	77474192	HRNBP3	5'UTR-opensea
cg11841239	female	-0.192588	0.0330944	4.47317e-08	0.0162772	1	172419269	C1orf105	Body-opensea
cg26234876	female	0.246099	0.0423409	4.62409e-08	0.0168264	11	66491629		IGR-shelf
cg15912732	female	0.25212	0.0434081	4.7163e-08	0.017162	14	105255285	AKT1	Body-shelf
cg11114313	female	-0.0569198	0.00980162	4.73758e-08	0.0172394	12	109222315	SSH1	Body-opensea
cg12912920	female	0.239942	0.0413246	4.75758e-08	0.0173122	4	140762680	MAML3	Body-opensea
cg10389644	female	-0.114962	0.0198022	4.77472e-08	0.0173745	7	1575621	MAFK	5'UTR-shore
cg04948284	female	0.178939	0.0308406	4.85344e-08	0.017661	11	65313608	LTBP3	Body-shore
cg04617936	female	0.28539	0.0492013	4.89034e-08	0.0177953	2	214353		IGR-shore
cg15451020	female	0.289762	0.0499733	4.93987e-08	0.0179755	11	278462	NLRP6	TSS200-shore
cg01886125	female	0.270152	0.0466149	5.00857e-08	0.0182255	2	110054030	SH3RF3	Body-opensea
cg18215449	female	-0.0482083	0.00831928	5.02354e-08	0.01828	12	66089473		IGR-opensea
cg04869379	female	-0.340206	0.0587374	5.09015e-08	0.0185224	13	109610256	MYO16	Body-opensea
cg01847206	female	-0.0983771	0.016994	5.16401e-08	0.0187911	5	14165995	TRIO	Body-opensea
cg08608727	female	0.23414	0.040452	5.18409e-08	0.0188642	12	111799994	FAM109A	3'UTR-shore
cg12140867	female	0.179162	0.0309578	5.20374e-08	0.0189357	7	155100546	INSIG1	3'UTR-opensea
cg13817395	female	-0.192889	0.0333414	5.25376e-08	0.0191177	6	32014926	TNXB	Body-opensea
cg04153135	female	0.203331	0.0351516	5.27493e-08	0.0191947	12	6881118	LAG3	TSS1500-shore
cg01115243	female	0.224044	0.0387471	5.33018e-08	0.0193958	16	69353023	VPS4A	Body-shore
cg18272377	female	0.259997	0.0449785	5.37389e-08	0.0195548	4	184207126	WWC2	Body-opensea
cg04870483	female	-0.0488793	0.00845764	5.40354e-08	0.0196627	16	86553722		IGR-shelf
cg20122492	female	0.113901	0.0197115	5.4266e-08	0.0197466	2	165555694	COBLL1	Body-opensea
cg22942576	female	0.234433	0.0405948	5.51588e-08	0.0200715	1	201476775	CSRP1	TSS1500-shore
cg09848693	female	-0.0448736	0.00777387	5.58315e-08	0.0203163	3	65394690	MAGI1	Body-opensea
cg09215582	female	0.22445	0.0388868	5.59565e-08	0.0203618	4	71575507	RUFY3	Body-shelf
cg11650648	female	-0.187677	0.0325194	5.61308e-08	0.0204252	17	9741522	GLP2R	Body-opensea
cg01212562	female	0.357579	0.0619638	5.62505e-08	0.0204688	21	46868092	COL18A1	Body-opensea
cg18436246	female	0.304195	0.052733	5.68316e-08	0.0206802	17	1640651	WDR81	Body-shelf
cg04093208	female	-0.193347	0.033527	5.72869e-08	0.0208459	13	39891557		IGR-opensea
cg16290534	female	0.156393	0.0271226	5.7483e-08	0.0209173	12	112207529	ALDH2	Body-shelf
cg02112681	female	0.156676	0.0271782	5.78596e-08	0.0210543	7	1120141	C7orf50	Body-island
cg11998307	female	-0.0692281	0.0120089	5.78784e-08	0.0210611	17	1549434	SCARF1	TSS1500-shelf
cg14370713	female	0.173959	0.0301765	5.78795e-08	0.0210615	9	112017985	EPB41L4B	Body-opensea
cg08470244	female	0.0465877	0.00808268	5.81047e-08	0.0211435	1	39917852	MACF1	Body-opensea
cg10718056	female	0.20924	0.0363071	5.83354e-08	0.0212275	6	28884599	TRIM27	Body-opensea
cg21329085	female	-0.0338331	0.00587165	5.85902e-08	0.0213202	6	80714760	TTK	5'UTR-shore
cg14594111	female	-0.107519	0.0186691	5.94e-08	0.0216148	9	124463457	DAB2IP	Body-shore
cg11104712	female	0.279868	0.0486089	5.98636e-08	0.0217835	17	7306613	C17orf61	Body-shore
cg05777976	female	-0.260447	0.0452476	6.02861e-08	0.0219373	11	2163538	IGF2AS	Body-shore
cg14094460	female	-0.138125	0.0239985	6.04274e-08	0.0219887	4	43900946		IGR-opensea
cg17311587	female	-0.166034	0.0288606	6.11628e-08	0.0222563	7	1250088		IGR-shore
cg02301740	female	-0.0435498	0.00757582	6.24571e-08	0.0227273	19	8804930		IGR-shelf
cg23551605	female	0.150532	0.0261889	6.26291e-08	0.0227899	2	236442942	AGAP1	Body-shore
cg06147743	female	0.206337	0.0359092	6.31754e-08	0.0229886	20	42835588	C20orf111	Body-shelf
cg17172761	female	-0.0834233	0.0145246	6.39276e-08	0.0232624	17	62120439	ERN1	3'UTR-opensea
cg14596967	female	0.308277	0.0537018	6.48446e-08	0.023596	11	113956944	ZBTB16	Body-shelf
cg06672226	female	0.164741	0.028703	6.51586e-08	0.0237103	16	85611689		IGR-opensea
cg23920246	female	-0.0945219	0.0164697	6.52679e-08	0.0237501	2	113398727		IGR-opensea
cg24530527	female	-0.078878	0.0137454	6.54669e-08	0.0238225	7	1162932	C7orf50	Body-opensea
cg01307507	female	-0.0697955	0.0121689	6.6373e-08	0.0241522	17	77751480	CBX2	TSS1500-island
cg15661389	female	-0.0848583	0.0147998	6.694e-08	0.0243585	17	10018631	GAS7	Body-opensea
cg07169003	female	0.23029	0.0401727	6.73346e-08	0.0245021	6	111999442	FYN	Body-opensea
cg07193511	female	0.199133	0.0347592	6.84739e-08	0.0249167	11	64017619		IGR-shore
cg07777344	female	0.278568	0.0486249	6.84828e-08	0.0249199	5	10757842	DAP	Body-shelf
cg02849507	female	-0.223671	0.039063	6.94493e-08	0.0252716	16	14051717		IGR-opensea
cg01034813	female	-0.132816	0.0232033	7.00662e-08	0.0254961	16	27487047	GTF3C1	Body-opensea
cg27367235	female	0.0703828	0.0122995	7.05975e-08	0.0256894	16	88568705	ZFPM1	Body-shore
cg27300045	female	-0.266146	0.046541	7.18967e-08	0.0261622	19	47610813	ZC3H4	Body-shelf
cg08780680	female	0.194299	0.0339771	7.18968e-08	0.0261623	13	24640963		IGR-opensea
cg23448153	female	-0.221894	0.0388462	7.40897e-08	0.0269602	19	46418941	NANOS2	TSS1500-shore
cg07824888	female	0.0974597	0.0170768	7.58361e-08	0.0275957	11	1976536	MRPL23	Body-shore
cg05101437	female	-0.330064	0.0578352	7.58966e-08	0.0276177	7	92262970	CDK6	Body-opensea
cg01195214	female	0.21003	0.0368096	7.6291e-08	0.0277612	16	1362243	UBE2I	5'UTR-shore
cg12109743	female	-0.0901009	0.0158106	7.88704e-08	0.0286998	11	3400108	ZNF195	Body-shore
cg02564259	female	0.224896	0.0394655	7.89423e-08	0.028726	16	67978429	SLC12A4	3'UTR-opensea
cg10374248	female	0.276986	0.0486168	7.94008e-08	0.0288928	10	99083645		IGR-shelf
cg05383524	female	0.144646	0.025396	8.00323e-08	0.0291226	16	4726970	MGRN1	Body-shelf
cg19543317	female	0.262562	0.0461036	8.02505e-08	0.029202	14	75918155	JDP2	Body-opensea
cg13920336	female	-0.0704461	0.0123717	8.05878e-08	0.0293248	2	238643964	LRRFIP1	Body-island
cg26381457	female	0.170264	0.0299018	8.05939e-08	0.029327	12	95911666	USP44	3'UTR-opensea
cg10495164	female	0.24355	0.042783	8.11349e-08	0.0295239	11	64631357	EHD1	Body-opensea
cg15577272	female	-0.263208	0.0462405	8.13378e-08	0.0295977	7	157932397	PTPRN2	Body-opensea
cg08145949	female	0.195672	0.0343861	8.19885e-08	0.0298345	4	1798209	FGFR3	Body-shore
cg15535471	female	0.136063	0.023912	8.21045e-08	0.0298767	7	139332087	HIPK2	Body-opensea
cg25350986	female	-0.108664	0.01911	8.36237e-08	0.0304295	7	4762844	FOXK1	Body-shore
cg04231636	female	0.281631	0.0495398	8.41277e-08	0.0306129	6	18186411	KDM1B	Body-opensea
cg17333242	female	-0.194225	0.0341788	8.50497e-08	0.0309484	2	31359928	GALNT14	Body-shore
cg21508713	female	-0.1776	0.0312535	8.50684e-08	0.0309552	5	2702510		IGR-opensea
cg04588969	female	0.0384071	0.00675924	8.52286e-08	0.0310135	20	36767986	TGM2	Body-opensea
cg08779982	female	-0.0702668	0.0123669	8.53599e-08	0.0310613	16	2131825	TSC2	Body-shelf
cg08900409	female	-0.253761	0.0446666	8.56019e-08	0.0311493	19	18475669	PGPEP1	3'UTR-opensea
cg03264464	female	-0.0631848	0.0111291	8.71197e-08	0.0317016	17	27070430	TRAF4	TSS1500-shore
cg27517823	female	0.2134	0.0375925	8.74425e-08	0.0318191	8	97523090	SDC2	Body-opensea
cg04685738	female	0.266784	0.0470004	8.76327e-08	0.0318883	16	68421884	SMPD3	5'UTR-opensea
cg14825976	female	-0.130014	0.0229079	8.79091e-08	0.0319889	18	13611370	C18orf1	TSS1500-opensea
cg20855160	female	-0.200829	0.0353865	8.79979e-08	0.0320212	15	22798986		IGR-opensea
cg05233094	female	0.235121	0.0414459	8.89679e-08	0.0323742	16	67976621	LCAT	Body-opensea
cg24475272	female	-0.0891508	0.0157173	8.93048e-08	0.0324968	4	140432613	SETD7	3'UTR-opensea
cg04897931	female	-0.0949756	0.0167446	8.93564e-08	0.0325155	17	152089	RPH3AL	Body-shore
cg04208175	female	0.196238	0.034598	8.93851e-08	0.032526	16	4734629	MGRN1	Body-shore
cg22745440	female	0.199523	0.0351786	8.94778e-08	0.0325597	6	33264022	RGL2	Body-shelf
cg16851771	female	-0.0383574	0.00676742	9.10712e-08	0.0331395	2	42360170		IGR-opensea
cg12151124	female	-0.133177	0.0235025	9.16891e-08	0.0333644	19	10381416	ICAM1	TSS200-island
cg06430102	female	-0.106355	0.0187762	9.26045e-08	0.0336975	19	1151960	SBNO2	Body-shore
cg17342247	female	-0.190687	0.0336649	9.26496e-08	0.0337139	17	3540594	CTNS	5'UTR-shore
cg12833018	female	-0.193619	0.0342057	9.43153e-08	0.03432	11	62037564	SCGB2A2	TSS200-opensea
cg02008627	female	-0.181866	0.0321373	9.49289e-08	0.0345433	16	6318633	A2BP1	5'UTR-opensea
cg07418387	female	-0.131371	0.0232288	9.64996e-08	0.0351149	1	240375464	FMN2	Body-shelf
cg18800739	female	0.254856	0.0450712	9.69482e-08	0.0352781	6	144626962	UTRN	Body-opensea
cg17961378	female	-0.0985016	0.0174266	9.79217e-08	0.0356323	22	39641154	PDGFB	TSS200-shore
cg04244985	female	-0.246179	0.0435594	9.82991e-08	0.0357697	19	55043845	KIR3DX1	TSS200-opensea
cg24681499	female	-0.0791419	0.014005	9.85696e-08	0.0358681	1	42706997	FOXJ3	Body-opensea
cg02206259	female	-0.0656178	0.0116126	9.87474e-08	0.0359328	1	231003485	C1orf198	Body-shore
cg20761290	female	-0.136718	0.0242008	9.93295e-08	0.0361446	11	60146039	MS4A7	5'UTR-opensea
cg26512283	female	-0.105287	0.0186546	1.01819e-07	0.0370504	16	57672401	GPR56	5'UTR-opensea
cg18505593	female	-0.0515239	0.00912905	1.01843e-07	0.0370593	14	100059479	CCDC85C	Body-opensea
cg08617970	female	0.182315	0.032305	1.02037e-07	0.0371297	6	30881112	VARS2	TSS1500-shore
cg09269891	female	-0.086463	0.015323	1.02433e-07	0.037274	16	3843415	CREBBP	Body-opensea
cg20489847	female	0.289869	0.0513831	1.03088e-07	0.0375124	8	144095483	LOC100133669	Body-shelf
cg08884928	female	0.229123	0.0406209	1.03481e-07	0.0376554	17	57431996	YPEL2	Body-opensea
cg09185911	female	0.173011	0.0306758	1.03736e-07	0.0377481	1	1688883	NADK	Body-shelf
cg26987690	female	0.0605725	0.0107427	1.04455e-07	0.0380099	7	907797	UNC84A	Body-shore
cg18801045	female	0.290319	0.0515079	1.05483e-07	0.0383837	5	10751081	DAP	Body-opensea
cg12699768	female	-0.187729	0.0333131	1.06029e-07	0.0385824	1	175115788	TNN	Body-opensea
cg12095594	female	-0.126675	0.0224815	1.06355e-07	0.0387011	1	223306857	TLR5	5'UTR-opensea
cg09502149	female	-0.145087	0.0257512	1.06561e-07	0.038776	1	43406792	SLC2A1	Body-opensea
cg20718434	female	0.285024	0.050589	1.06611e-07	0.0387943	7	1748597	ELFN1	TSS200-opensea
cg22430036	female	0.219252	0.0389202	1.06977e-07	0.0389274	7	134592620	CALD1	Body-opensea
cg03741653	female	0.268772	0.0477229	1.07697e-07	0.0391893	8	22033396	BMP1	Body-shore
cg13250285	female	0.227482	0.0404337	1.10674e-07	0.0402728	3	50228871	GNAT1	TSS200-shore
cg09845785	female	-0.190675	0.0339074	1.12048e-07	0.0407727	2	183387501	PDE1A	TSS200-opensea
cg14476101	female	0.333924	0.0594068	1.13316e-07	0.041234	1	120255992	PHGDH	Body-shore
cg16044109	female	-0.0867	0.0154268	1.13785e-07	0.0414046	3	124762597	HEG1	Body-opensea
cg20208203	female	0.284526	0.0506469	1.14985e-07	0.0418416	21	38932835		IGR-shelf
cg23731992	female	0.038529	0.00685906	1.15299e-07	0.0419557	10	13708083	FRMD4A	Body-opensea
cg13740598	female	0.280693	0.049988	1.16389e-07	0.0423525	19	18419211	LSM4	Body-shore
cg09636715	female	0.21731	0.038718	1.17789e-07	0.0428618	7	27217057	HOXA10	Body-shelf
cg16565696	female	-0.262626	0.0468023	1.18461e-07	0.0431064	20	44834899	CDH22	Body-shelf
cg22331032	female	0.245135	0.043686	1.18526e-07	0.04313	11	278403	NLRP6	TSS200-shore
cg00280858	female	-0.219811	0.0391909	1.19943e-07	0.0436457	7	157809235	PTPRN2	Body-opensea
cg14762896	female	-0.168947	0.0301402	1.21811e-07	0.0443253	20	61691785		IGR-shelf
cg04242070	female	-0.165195	0.0294728	1.22032e-07	0.0444056	5	1749101		IGR-shelf
cg07478098	female	0.264562	0.0472582	1.2592e-07	0.0458204	3	127799975	RUVBL1	3'UTR-shelf
cg09796089	female	-0.201237	0.0359549	1.26684e-07	0.0460987	14	104668921		IGR-opensea
cg21554217	female	-0.0744908	0.0133097	1.268e-07	0.0461407	5	138897467		IGR-island
cg06317805	female	0.234432	0.0418926	1.27203e-07	0.0462874	3	106782589		IGR-opensea
cg24099605	female	0.234567	0.0419246	1.27843e-07	0.0465202	14	95035773	SERPINA4	Body-opensea
cg09472004	female	-0.132849	0.0237446	1.27858e-07	0.0465259	1	87240156		IGR-opensea
cg23967848	female	0.162773	0.0290992	1.28569e-07	0.0467844	2	71556215		IGR-shelf
cg19778015	female	-0.0795383	0.0142192	1.28571e-07	0.0467852	3	11625154	VGLL4	Body-opensea
cg16820973	female	0.296432	0.0530031	1.29168e-07	0.0470026	12	32711698	FGD4	5'UTR-opensea
cg05133853	female	-0.14361	0.0256941	1.31292e-07	0.0477752	11	5265008	HBBP1	TSS200-opensea
cg15138236	female	0.247798	0.0443426	1.31866e-07	0.0479843	1	113466489	AFARP1	Body-opensea
cg00918541	female	-0.0190337	0.00340626	1.32106e-07	0.0480715	1	6546027	PLEKHG5	5'UTR-shore
cg00024471	female	0.252233	0.045146	1.32603e-07	0.0482523	3	188692547		IGR-opensea
cg15410169	female	0.232321	0.0415905	1.33307e-07	0.0485085	7	29518429	CHN2	TSS1500-opensea
cg13293488	female	-0.155245	0.0277931	1.33418e-07	0.0485489	2	879510		IGR-opensea
cg13594432	female	-0.0251604	0.00450542	1.34203e-07	0.0488345	14	23451963	JUB	TSS200-island
cg00076313	female	0.244821	0.0438411	1.34316e-07	0.0488757	7	1748610	ELFN1	TSS200-opensea
cg02188818	female	-0.162673	0.0291501	1.3667e-07	0.0497325	4	141676849	TBC1D9	Body-shore
cg27000120	male	0.381243	0.0166936	5.09344e-65	1.85343e-59	16	88917283	GALNS	Body-opensea
cg26915558	male	0.312464	0.0158034	2.02475e-54	7.3678e-49	11	68181218	LRP5	Body-island
cg13814654	male	0.231546	0.0120168	1.2043e-52	4.38228e-47	2	101666894	TBC1D8	Body-opensea
cg14054357	male	0.283537	0.0150165	2.81936e-51	1.02592e-45	17	2607986	KIAA0664	5'UTR-island
cg19786751	male	0.289359	0.01629	2.69188e-47	9.79536e-42	12	109639296	ACACB	Body-opensea
cg13894813	male	0.260023	0.0152482	9.30586e-45	3.38627e-39	11	68181087	LRP5	Body-island
cg06621784	male	-0.13368	0.00785512	1.23565e-44	4.49636e-39	1	53480551	SCP2	TSS200-opensea
cg13053914	male	0.154276	0.00909483	1.94757e-44	7.08694e-39	7	75511260	RHBDD2	Body-shelf
cg07688052	male	0.228039	0.013454	2.17779e-44	7.92468e-39	19	16637309	CHERP	Body-shore
cg05009047	male	0.194887	0.0116301	1.06317e-43	3.86872e-38	16	4659466	FAM100A	3'UTR-island
cg00891995	male	-0.194292	0.0118674	2.54725e-42	9.26907e-37	1	153113262	SPRR2C	Body-opensea
cg18358952	male	0.069406	0.00430751	2.15913e-41	7.85677e-36	14	103468050	CDC42BPB	Body-opensea
cg10507988	male	0.108295	0.00674307	3.33175e-41	1.21238e-35	2	46593271	EPAS1	Body-opensea
cg22799110	male	0.173038	0.0109171	1.88202e-40	6.84839e-35	11	68181288	LRP5	Body-island
cg10505257	male	0.268844	0.0174946	1.00619e-38	3.66139e-33	16	4731639	MGRN1	Body-island
cg16361543	male	0.118956	0.00786092	6.93997e-38	2.52536e-32	11	1299372	TOLLIP	Body-island
cg05745622	male	0.210668	0.0141761	6.47845e-37	2.35742e-31	17	80510469	FOXK2	Body-opensea
cg00738178	male	-0.405555	0.0285314	1.29329e-34	4.70612e-29	1	53480710	SCP2	1stExon-opensea
cg16222581	male	0.202015	0.0142654	1.99488e-34	7.25911e-29	7	926431	C7orf20	Body-shelf
cg18110520	male	0.259115	0.0185663	1.06284e-33	3.86754e-28	11	76803666	CAPN5	Body-opensea
cg05106269	male	-0.112387	0.00807804	1.51612e-33	5.51694e-28	19	10381393	ICAM1	TSS200-island
cg14096180	male	-0.0587987	0.00423735	2.03765e-33	7.41471e-28	11	67141628	CLCF1	1stExon-shore
cg23931323	male	-0.282371	0.0203768	2.37505e-33	8.64248e-28	11	73372278	PLEKHB1	Body-island
cg05233128	male	0.330232	0.0238645	2.78811e-33	1.01455e-27	19	3659669	PIP5K1C	Body-island
cg00459078	male	-0.0846144	0.00611677	2.89444e-33	1.05325e-27	17	43024659	KIF18B	5'UTR-island
cg25564800	male	-0.111348	0.00808915	5.03499e-33	1.83216e-27	3	122234134	KPNA1	TSS1500-shore
cg03497652	male	0.332494	0.0242899	9.3817e-33	3.41387e-27	16	4751569	ANKS3	Body-opensea
cg09863659	male	-0.152682	0.0111861	1.29084e-32	4.69719e-27	20	30328246	TPX2	5'UTR-shore
cg15364131	male	-0.247907	0.0182273	1.9124e-32	6.95897e-27	22	32341622	C22orf24	TSS1500-shore
cg21072795	male	-0.307397	0.0227633	4.19163e-32	1.52527e-26	12	54920931	NCKAP1L	Body-opensea
cg23807215	male	0.182419	0.0135574	6.22267e-32	2.26434e-26	2	101666942	TBC1D8	Body-opensea
cg15644389	male	-0.1037	0.00770986	6.48086e-32	2.3583e-26	22	32341492	C22orf24	TSS200-shore
cg15302350	male	0.216361	0.0161519	1.01114e-31	3.67938e-26	11	68180760	LRP5	Body-shore
cg13037245	male	-0.0798624	0.00596352	1.04041e-31	3.7859e-26	11	67141961	LOC100130987	Body-shore
cg21009747	male	0.335863	0.0252738	2.38969e-31	8.69575e-26	22	36681341	MYH9	Body-opensea
cg13253199	male	0.246885	0.0186742	4.14866e-31	1.50964e-25	12	109684116	ACACB	Body-opensea
cg24721350	male	0.0914414	0.00694435	6.35903e-31	2.31396e-25	7	75511202	RHBDD2	Body-shelf
cg21982437	male	-0.157055	0.0119742	9.64339e-31	3.5091e-25	19	51670432	SIGLECP3	TSS200-opensea
cg03610629	male	0.314802	0.0244253	6.02159e-30	2.19117e-24	11	611114	PHRF1	Body-shore
cg12151124	male	-0.175526	0.0137305	1.39442e-29	5.0741e-24	19	10381416	ICAM1	TSS200-island
cg13709634	male	0.322011	0.0252449	1.7476e-29	6.35928e-24	11	679709	DEAF1	Body-opensea
cg17453767	male	0.230281	0.0181896	3.75101e-29	1.36494e-23	4	144277796	GAB1	Body-opensea
cg09042787	male	0.124007	0.00980901	4.32758e-29	1.57475e-23	17	17463324	PEMT	Body-shore
cg15285733	male	-0.192436	0.015239	4.8491e-29	1.76452e-23	17	10039537	GAS7	Body-opensea
cg18476530	male	-0.0967998	0.00767807	5.715e-29	2.07961e-23	11	67141747	LOC100130987	Body-shore
cg20668546	male	0.181045	0.0143688	6.06517e-29	2.20703e-23	17	42989323	GFAP	Body-shore
cg19854293	male	0.21643	0.0172135	7.50078e-29	2.72943e-23	5	1052919	SLC12A7	Body-shore
cg14290616	male	-0.181218	0.0144702	1.11513e-28	4.05779e-23	22	40420987	FAM83F	Body-shelf
cg18140889	male	-0.176888	0.0142294	2.3284e-28	8.47271e-23	1	153177577	LELP1	3'UTR-opensea
cg02319187	male	0.338477	0.0272711	2.71959e-28	9.89621e-23	9	137229907	RXRA	Body-island
cg07812289	male	0.208381	0.0168395	3.65254e-28	1.32911e-22	16	4731718	MGRN1	Body-island
cg09340639	male	-0.114093	0.00925481	5.28718e-28	1.92393e-22	1	157789662	FCRL1	Body-opensea
cg04880546	male	-0.122301	0.00996102	7.85787e-28	2.85937e-22	12	120868468		IGR-opensea
cg07556730	male	0.322484	0.0264546	1.5765e-27	5.73668e-22	11	679706	DEAF1	Body-opensea
cg26914705	male	-0.153435	0.0126312	2.21274e-27	8.05186e-22	22	32341446	C22orf24	TSS200-shore
cg04703620	male	-0.227406	0.0187274	2.2887e-27	8.32827e-22	5	2703395		IGR-opensea
cg15498306	male	-0.237797	0.0197667	5.57772e-27	2.02966e-21	4	164534641	2024-03-01	Body-opensea
cg14254966	male	0.105645	0.00880736	7.35482e-27	2.67631e-21	9	136743443	VAV2	Body-opensea
cg07031551	male	-0.2081	0.0173554	7.62722e-27	2.77544e-21	11	72463331	ARAP1	5'UTR-island
cg24938956	male	-0.0395399	0.00332163	1.50948e-26	5.49277e-21	19	4670603	C19orf10	TSS200-shore
cg27111150	male	0.247274	0.0208959	2.61801e-26	9.52656e-21	10	97183248	SORBS1	Body-opensea
cg05463307	male	0.23092	0.0195293	2.8173e-26	1.02518e-20	6	138729779	HEBP2	Body-shelf
cg13678641	male	-0.0290523	0.00246413	3.6837e-26	1.34045e-20	17	8113909	AURKB	TSS200-island
cg20778958	male	-0.213554	0.0181142	3.70653e-26	1.34876e-20	1	158534679	OR6P1	TSS1500-opensea
cg07058027	male	0.251589	0.021404	4.87651e-26	1.77449e-20	11	7694188	CYB5R2	5'UTR-shore
cg19069346	male	-0.116483	0.00991325	5.03242e-26	1.83123e-20	21	41239214	PCP4	TSS200-opensea
cg02017450	male	-0.286789	0.0244237	5.36029e-26	1.95054e-20	10	10631670		IGR-opensea
cg03956606	male	0.279529	0.0238281	5.84981e-26	2.12866e-20	1	11249057	MTOR	Body-opensea
cg03844372	male	-0.279922	0.0238761	6.18437e-26	2.25041e-20	10	24160305	KIAA1217	5'UTR-opensea
cg07155724	male	0.2614	0.0223678	8.29321e-26	3.01778e-20	14	105165730	INF2	5'UTR-shore
cg04387175	male	0.118121	0.0101283	9.99724e-26	3.63785e-20	16	88568629	ZFPM1	Body-shore
cg08971171	male	0.1105	0.00952846	1.66952e-25	6.07516e-20	7	99691611	MIR25	TSS1500-opensea
cg10569694	male	-0.0616958	0.00533891	2.29698e-25	8.35837e-20	7	5013509	RNF216L	TSS200-island
cg16719582	male	0.298623	0.0259222	3.03815e-25	1.10554e-19	12	133090971	FBRSL1	Body-opensea
cg15602548	male	-0.0731875	0.00635736	3.22596e-25	1.17388e-19	2	54786148	SPTBN1	Body-shore
cg24405700	male	-0.19935	0.0173333	3.52154e-25	1.28144e-19	12	655829	B4GALNT3	Body-opensea
cg09845785	male	-0.228067	0.0199093	5.02347e-25	1.82797e-19	2	183387501	PDE1A	TSS200-opensea
cg09313745	male	0.281465	0.0245715	5.03677e-25	1.83281e-19	12	3373666	TSPAN9	Body-opensea
cg26282205	male	0.311074	0.0272177	6.15635e-25	2.24021e-19	10	75602367	CAMK2G	Body-shelf
cg18030386	male	0.302544	0.0265348	7.60729e-25	2.76819e-19	19	4944160	UHRF1	Body-island
cg19817005	male	-0.0439457	0.00386597	9.93792e-25	3.61627e-19	5	172068692	NEURL1B	Body-island
cg04471375	male	0.225454	0.019858	1.10762e-24	4.03046e-19	16	58752165	GOT2	Body-opensea
cg08269316	male	-0.144759	0.0127807	1.36404e-24	4.96356e-19	4	174254507	HMGB2	Body-shore
cg27444899	male	0.104563	0.00923539	1.41161e-24	5.13664e-19	16	565493	RAB11FIP3	Body-island
cg24740274	male	-0.202614	0.0179711	2.03937e-24	7.421e-19	10	98100153		IGR-opensea
cg03917020	male	0.300751	0.0266849	2.10251e-24	7.65073e-19	16	85285139		IGR-opensea
cg00159379	male	0.241421	0.0214515	2.3832e-24	8.67213e-19	4	85818877	WDFY3	5'UTR-opensea
cg23729763	male	-0.120756	0.0107678	3.23638e-24	1.17767e-18	11	129991544	APLP2	Body-shore
cg00981877	male	-0.0828324	0.00739818	3.72535e-24	1.3556e-18	20	50366841	ATP9A	Body-opensea
cg26720452	male	-0.145314	0.0129855	3.89585e-24	1.41765e-18	8	57472776		IGR-opensea
cg12371587	male	-0.171409	0.0153465	4.58778e-24	1.66943e-18	22	42093157	C22orf46	3'UTR-shelf
cg11835512	male	-0.164464	0.0147326	4.80598e-24	1.74883e-18	19	11266792	SPC24	TSS1500-shore
cg21104276	male	0.221064	0.019872	6.47926e-24	2.35771e-18	7	90896572	FZD1	1stExon-island
cg27016272	male	0.183584	0.0165104	6.73986e-24	2.45254e-18	3	32344486	CMTM8	Body-opensea
cg23672425	male	0.267219	0.0240432	7.01185e-24	2.55151e-18	1	11249037	MTOR	Body-opensea
cg26690592	male	-0.201702	0.0181571	7.30863e-24	2.65951e-18	11	19261879	E2F8	5'UTR-shore
cg11251690	male	0.101604	0.00921798	1.41842e-23	5.16142e-18	7	1493126	MICALL2	Body-shore
cg04294971	male	0.378303	0.0343647	1.57725e-23	5.7394e-18	17	80006775	RFNG	Body-shore
cg05919312	male	0.271594	0.0249715	4.33597e-23	1.5778e-17	11	7694163	CYB5R2	5'UTR-shore
cg11841239	male	-0.233548	0.021492	4.65864e-23	1.69521e-17	1	172419269	C1orf105	Body-opensea
cg24988159	male	0.252001	0.0232199	5.18203e-23	1.88567e-17	15	35591514		IGR-opensea
cg12027899	male	0.222934	0.0205546	5.46149e-23	1.98736e-17	11	58385947	ZFP91	3'UTR-opensea
cg21288685	male	-0.290434	0.0268241	6.29084e-23	2.28915e-17	1	1109244	TTLL10	TSS200-shore
cg11835347	male	-0.240482	0.022217	6.44211e-23	2.34419e-17	1	113248232	RHOC	5'UTR-shore
cg27367235	male	0.067589	0.00624426	6.44388e-23	2.34484e-17	16	88568705	ZFPM1	Body-shore
cg17295666	male	-0.141642	0.0131034	7.20023e-23	2.62006e-17	20	3140861	UBOX5	TSS1500-shore
cg23246769	male	0.255106	0.0236081	7.40711e-23	2.69534e-17	12	124461296	ZNF664	5'UTR-shelf
cg12229632	male	0.239878	0.0222285	8.26574e-23	3.00779e-17	17	2607906	KIAA0664	5'UTR-island
cg19817882	male	0.228254	0.0212304	1.12167e-22	4.08159e-17	1	226075069	LEFTY1	Body-shore
cg24318537	male	0.161384	0.0150122	1.13144e-22	4.11714e-17	12	121159512	UNC119B	3'UTR-shelf
cg26454350	male	0.189328	0.0176843	1.58185e-22	5.75611e-17	17	27493204	MYO18A	Body-island
cg13375463	male	0.283146	0.026452	1.60402e-22	5.83682e-17	1	27899025	AHDC1	5'UTR-shelf
cg04508649	male	0.215608	0.0201674	1.7726e-22	6.45025e-17	1	11249046	MTOR	Body-opensea
cg19544919	male	-0.139726	0.0130967	2.09715e-22	7.63124e-17	19	18451228	PGPEP1	TSS200-shore
cg11401159	male	0.206335	0.0193429	2.12137e-22	7.71936e-17	5	6759129		IGR-shelf
cg17504997	male	-0.0465587	0.00437691	2.65948e-22	9.67747e-17	5	59995433	DEPDC1B	Body-island
cg24169915	male	-0.202958	0.0191227	3.1856e-22	1.1592e-16	14	99177987	C14orf177	1stExon-opensea
cg13014333	male	-0.105418	0.00993444	3.23522e-22	1.17725e-16	6	31762776	VARS	Body-shore
cg08701566	male	-0.103546	0.00975805	3.23789e-22	1.17822e-16	15	78911099	CHRNA3	Body-shore
cg09180239	male	0.10999	0.0103797	3.61903e-22	1.31692e-16	16	85666676	KIAA0182	5'UTR-island
cg26112622	male	0.234079	0.0220933	3.66172e-22	1.33245e-16	1	2339890	PEX10	Body-island
cg04875697	male	0.314172	0.0297125	4.29988e-22	1.56467e-16	9	137228542	RXRA	Body-shore
cg03257417	male	-0.236071	0.0223722	5.06569e-22	1.84333e-16	1	111189871		IGR-opensea
cg14015726	male	0.313424	0.0297057	5.10546e-22	1.85781e-16	22	40807049	MKL1	3'UTR-opensea
cg00806259	male	0.194437	0.0184546	5.71644e-22	2.08013e-16	16	68265587	ESRP2	Body-shelf
cg16496024	male	-0.215129	0.020433	6.04715e-22	2.20047e-16	21	41239042	PCP4	TSS1500-opensea
cg18842353	male	-0.215732	0.0205022	6.33257e-22	2.30433e-16	13	97794052		IGR-opensea
cg17569842	male	0.333158	0.0316813	6.64707e-22	2.41878e-16	4	3371566	RGS12	Body-shelf
cg17217096	male	0.277609	0.0264471	7.67779e-22	2.79384e-16	17	48626642	SPATA20	Body-shore
cg22730459	male	-0.11429	0.0109121	9.13627e-22	3.32456e-16	11	83548035	DLG2	Body-opensea
cg06671654	male	0.0390608	0.00373078	9.39703e-22	3.41945e-16	6	31750165	VARS	Body-opensea
cg25439632	male	-0.214013	0.0204832	1.10588e-21	4.02415e-16	8	49892209		IGR-shore
cg10078898	male	0.257257	0.0246462	1.19385e-21	4.34426e-16	14	21491045	NDRG2	Body-shore
cg08819417	male	0.0815321	0.00781164	1.20054e-21	4.3686e-16	16	4659349	FAM100A	3'UTR-island
cg25595388	male	-0.149453	0.0143399	1.34391e-21	4.89032e-16	5	2684004		IGR-opensea
cg12921171	male	0.253337	0.0243313	1.45143e-21	5.28154e-16	15	63204710		IGR-opensea
cg18218112	male	0.282241	0.0273072	2.56712e-21	9.34139e-16	7	1748639	ELFN1	TSS200-opensea
cg11267802	male	-0.196185	0.0190173	2.97264e-21	1.0817e-15	1	153123593	SPRR2G	TSS200-opensea
cg22955595	male	0.187996	0.0182321	3.08289e-21	1.12182e-15	5	1052903	SLC12A7	Body-shore
cg12624087	male	-0.056981	0.00553878	3.6774e-21	1.33815e-15	22	32341561	C22orf24	TSS1500-shore
cg16382314	male	0.168634	0.0164164	4.1236e-21	1.50052e-15	1	2200962	SKI	Body-opensea
cg04801430	male	0.27525	0.0267997	4.1748e-21	1.51915e-15	19	3659739	PIP5K1C	Body-island
cg17045044	male	0.300473	0.029279	4.4382e-21	1.615e-15	17	40192702		IGR-shore
cg05956452	male	0.111915	0.0109058	4.45351e-21	1.62057e-15	6	158018138	ZDHHC14	Body-shelf
cg06101324	male	-0.199296	0.019436	4.72695e-21	1.72007e-15	1	152955543	SPRR1A	TSS1500-opensea
cg26361533	male	-0.262803	0.0256471	4.98189e-21	1.81284e-15	12	2445561	CACNA1C	Body-opensea
cg05839570	male	0.209567	0.020464	5.21343e-21	1.89709e-15	3	46730941	ALS2CL	5'UTR-shelf
cg07181257	male	0.302969	0.0296204	5.71817e-21	2.08076e-15	1	27876033	AHDC1	Body-shore
cg16993682	male	-0.138065	0.0135246	6.63018e-21	2.41263e-15	1	158259268	CD1C	TSS1500-opensea
cg22727641	male	-0.145093	0.0142591	8.47216e-21	3.0829e-15	8	101157742	FBXO43	1stExon-island
cg16663980	male	-0.218491	0.0214869	8.91971e-21	3.24576e-15	1	158809049	MNDA	5'UTR-opensea
cg06131338	male	0.340801	0.0335763	1.02331e-20	3.72367e-15	12	109639461	ACACB	Body-opensea
cg05379541	male	0.227789	0.0224653	1.10565e-20	4.02331e-15	7	27252541		IGR-shore
cg00043005	male	0.129233	0.0127461	1.11077e-20	4.04194e-15	19	2227429	DOT1L	Body-island
cg05357039	male	-0.0609184	0.00601287	1.17556e-20	4.27769e-15	11	67141686	LOC100130987	Body-shore
cg03185752	male	-0.163617	0.0161777	1.33958e-20	4.87453e-15	1	954631	AGRN	TSS1500-shore
cg25027584	male	0.303516	0.0300266	1.39496e-20	5.07607e-15	7	1748302	ELFN1	TSS1500-opensea
cg05166354	male	-0.140295	0.0138978	1.54196e-20	5.61098e-15	22	45216631	ARHGAP8	Body-opensea
cg26312920	male	-0.212391	0.021044	1.56491e-20	5.69449e-15	7	31380390	NEUROD6	5'UTR-shelf
cg26904260	male	-0.138124	0.0136925	1.62574e-20	5.91585e-15	11	45714651		IGR-opensea
cg10506715	male	0.240816	0.0239035	1.78998e-20	6.51349e-15	14	100793557	C14orf68	Body-shore
cg09361748	male	-0.170661	0.0169473	1.8499e-20	6.73154e-15	7	71682306	CALN1	Body-opensea
cg21610839	male	0.321548	0.0319369	1.87574e-20	6.82555e-15	3	23861312	UBE2E1	Body-opensea
cg20730595	male	0.259154	0.0257409	1.88157e-20	6.84676e-15	22	41513219	EP300	Body-opensea
cg18321533	male	0.124848	0.0124048	1.92749e-20	7.01387e-15	14	21162163	ANG	Body-opensea
cg05979320	male	-0.103673	0.0103093	2.04836e-20	7.45369e-15	12	49629187		IGR-shore
cg12095594	male	-0.141342	0.0140569	2.06747e-20	7.52325e-15	1	223306857	TLR5	5'UTR-opensea
cg17311587	male	-0.157898	0.0157231	2.26901e-20	8.25662e-15	7	1250088		IGR-shore
cg03157150	male	0.133743	0.0133367	2.5211e-20	9.17395e-15	16	4738680	MGRN1	3'UTR-opensea
cg27017251	male	0.144597	0.0144215	2.55205e-20	9.28655e-15	22	22334553	TOP3B	5'UTR-shelf
cg06060137	male	-0.0982246	0.00980268	2.67399e-20	9.73029e-15	13	72650518		IGR-opensea
cg08781340	male	0.173645	0.0173439	2.84234e-20	1.03429e-14	16	85285111		IGR-opensea
cg01973483	male	0.17935	0.0179222	2.94376e-20	1.07119e-14	12	123591123	PITPNM2	5'UTR-opensea
cg26878836	male	0.248152	0.0248024	2.98765e-20	1.08716e-14	11	68183902	LRP5	Body-shelf
cg10063227	male	-0.193929	0.0194219	3.46288e-20	1.26009e-14	X	50211229	DGKK	Body-shore
cg18473978	male	-0.14117	0.0141422	3.53882e-20	1.28773e-14	3	195615386	TNK2	Body-shore
cg09174555	male	-0.143212	0.0143645	3.87349e-20	1.40951e-14	1	153364020	S100A8	TSS1500-opensea
cg00454447	male	0.360051	0.0361305	4.00666e-20	1.45797e-14	16	3728185	TRAP1	Body-shelf
cg24921221	male	-0.308337	0.0309509	4.10141e-20	1.49245e-14	8	12584192	LONRF1	Body-opensea
cg07143815	male	-0.164563	0.016522	4.15822e-20	1.51312e-14	8	66474918		IGR-opensea
cg08472795	male	0.122838	0.0123586	4.84324e-20	1.76239e-14	2	129067253	HS6ST1	Body-opensea
cg07085895	male	-0.0816053	0.00824351	6.50471e-20	2.36697e-14	11	19262124	E2F8	1stExon-island
cg11024165	male	0.260411	0.026365	7.6531e-20	2.78486e-14	7	94957055		IGR-shelf
cg19588538	male	0.283583	0.0287585	8.62512e-20	3.13856e-14	10	5693331	ASB13	Body-opensea
cg06210783	male	-0.118446	0.0120332	9.81039e-20	3.56986e-14	11	68205335	LRP5	Body-shore
cg22476269	male	-0.146369	0.0148746	1.00302e-19	3.64984e-14	20	61335865		IGR-shelf
cg25528709	male	0.0671258	0.00682306	1.01888e-19	3.70756e-14	5	1080273	SLC12A7	Body-island
cg17112975	male	0.20222	0.020575	1.09347e-19	3.979e-14	17	75431407	2024-09-09	Body-opensea
cg22840650	male	0.226384	0.0230481	1.14401e-19	4.16287e-14	10	99271879	UBTD1	Body-opensea
cg19718686	male	-0.243716	0.0248255	1.18731e-19	4.32046e-14	12	115141551		IGR-shelf
cg26940328	male	-0.215341	0.0219426	1.21651e-19	4.42671e-14	17	11148412	SHISA6	Body-shelf
cg09321109	male	0.33562	0.0341991	1.21766e-19	4.4309e-14	16	2087555	SLC9A3R2	Body-shore
cg01449469	male	0.307461	0.0313517	1.28039e-19	4.65918e-14	6	30644681	KIAA1949	3'UTR-shelf
cg22659267	male	0.0262731	0.00268033	1.32463e-19	4.82016e-14	4	3517885	LRPAP1	Body-shore
cg12614090	male	-0.0710754	0.00726198	1.47613e-19	5.37145e-14	10	116444240	ABLIM1	1stExon-opensea
cg16423499	male	-0.202938	0.0207545	1.57992e-19	5.74911e-14	4	164532533	2024-03-01	Body-opensea
cg15952487	male	-0.136703	0.0139938	1.68926e-19	6.14699e-14	1	158300733	CD1B	Body-opensea
cg00399027	male	0.156788	0.0160807	1.93709e-19	7.0488e-14	16	85676861	KIAA0182	5'UTR-shore
cg25597535	male	-0.266845	0.0273918	2.05779e-19	7.48801e-14	7	31379820	NEUROD6	5'UTR-shelf
cg11724984	male	-0.132017	0.0135644	2.19955e-19	8.00384e-14	12	121890864	KDM2B	Body-island
cg14570632	male	0.140574	0.0144482	2.24928e-19	8.1848e-14	9	137243592	RXRA	Body-opensea
cg02497902	male	-0.0543112	0.00558503	2.33495e-19	8.49657e-14	19	10380810	ICAM1	TSS1500-island
cg17801765	male	-0.100681	0.0103583	2.41417e-19	8.78481e-14	1	958274	AGRN	Body-shore
cg25641145	male	-0.136012	0.0140081	2.60199e-19	9.46829e-14	8	101572366	ANKRD46	TSS1500-shore
cg05053327	male	0.230965	0.0237916	2.63471e-19	9.58734e-14	17	40837383	CNTNAP1	Body-island
cg08427717	male	-0.104197	0.0107351	2.66509e-19	9.69788e-14	19	10381383	ICAM1	TSS200-island
cg14001518	male	0.0315214	0.00324811	2.69815e-19	9.8182e-14	9	35561435	RUSC2	3'UTR-opensea
cg17183215	male	0.155235	0.0160082	2.84579e-19	1.03554e-13	1	2200984	SKI	Body-opensea
cg25306579	male	0.269957	0.0278588	2.99484e-19	1.08978e-13	10	134468976	INPP5A	Body-island
cg13168187	male	0.201556	0.0208062	3.05808e-19	1.11279e-13	2	159523681	PKP4	Body-opensea
cg04291025	male	-0.183764	0.0189783	3.15791e-19	1.14912e-13	15	69746140	RPLP1	Body-shore
cg19521693	male	-0.115805	0.0119648	3.25383e-19	1.18402e-13	19	54468577	CACNG8	Body-shore
cg24028809	male	-0.309396	0.0319688	3.26997e-19	1.1899e-13	6	153414101	RGS17	5'UTR-opensea
cg11624479	male	-0.121294	0.0125363	3.33276e-19	1.21274e-13	11	9285586	DENND5A	Body-shore
cg17183362	male	-0.182842	0.0189029	3.40034e-19	1.23734e-13	6	31804159	C6orf48	5'UTR-shore
cg15904939	male	0.271502	0.0280856	3.54536e-19	1.29011e-13	19	1828124	REXO1	Body-island
cg15202552	male	-0.167236	0.0173569	4.46453e-19	1.62458e-13	1	157671759	FCRL3	TSS1500-opensea
cg11009596	male	-0.2001	0.0207723	4.53517e-19	1.65028e-13	17	8113758	AURKB	5'UTR-island
cg20703564	male	-0.156687	0.0162714	4.64803e-19	1.69135e-13	20	36157016	BLCAP	TSS1500-shore
cg09363892	male	-0.149744	0.0155524	4.69169e-19	1.70724e-13	1	954619	AGRN	TSS1500-shore
cg26414000	male	0.264335	0.0275116	5.42843e-19	1.97533e-13	1	85721327	C1orf52	Body-shelf
cg14242895	male	0.256893	0.0267435	5.52215e-19	2.00943e-13	11	118393450	MLL	3'UTR-opensea
cg12393104	male	0.29771	0.0310477	6.24333e-19	2.27186e-13	22	20233758	RTN4R	Body-shelf
cg11426662	male	-0.0272154	0.00284402	7.1866e-19	2.6151e-13	X	152127457	ZNF185	Body-island
cg09169356	male	-0.168504	0.0176102	7.22958e-19	2.63074e-13	10	2323382		IGR-opensea
cg27620946	male	-0.0484311	0.00506315	7.39345e-19	2.69037e-13	8	42011116	AP3M2	5'UTR-shore
cg23131909	male	0.278185	0.0291202	8.08683e-19	2.94268e-13	2	219267443	MIR26B	Body-shore
cg19861632	male	0.170371	0.0178641	9.07015e-19	3.3005e-13	4	22392700	GPR125	Body-opensea
cg14189782	male	-0.250896	0.02634	9.87637e-19	3.59387e-13	11	65342283	EHBP1L1	TSS1500-island
cg08170679	male	0.309298	0.0325026	1.05504e-18	3.83912e-13	16	73025828	ZFHX3	5'UTR-opensea
cg24681845	male	-0.150674	0.0158608	1.18671e-18	4.31827e-13	10	126069759		IGR-opensea
cg09329705	male	-0.0532239	0.00560381	1.20371e-18	4.38013e-13	19	4909474	UHRF1	TSS200-island
cg13859347	male	0.110085	0.0116074	1.32869e-18	4.83493e-13	9	139578788	AGPAT2	Body-shelf
cg02289739	male	0.203785	0.021505	1.40657e-18	5.11832e-13	7	131156554	MKLN1	Body-opensea
cg20743628	male	0.235001	0.0248051	1.42972e-18	5.20254e-13	7	65664128		IGR-opensea
cg17134153	male	-0.179022	0.0189023	1.46051e-18	5.31461e-13	1	157670328	FCRL3	5'UTR-opensea
cg01484141	male	-0.0507984	0.00536864	1.5564e-18	5.66352e-13	17	1624157	WDR81	Body-shelf
cg14176088	male	-0.146159	0.0154684	1.71071e-18	6.22505e-13	1	9785289	PIK3CD	Body-opensea
cg15332951	male	0.220575	0.023364	1.8131e-18	6.59761e-13	17	21194739	MAP2K3	Body-opensea
cg04742135	male	0.329213	0.0349422	2.07984e-18	7.56823e-13	4	1800154	FGFR3	Body-island
cg03517073	male	-0.125245	0.0132982	2.13195e-18	7.75786e-13	2	239957283		IGR-opensea
cg26435670	male	-0.11156	0.0118561	2.2684e-18	8.25439e-13	10	88515340	BMPR1A	TSS1500-shore
cg00170236	male	0.088551	0.00941134	2.27785e-18	8.28877e-13	7	99691604	MIR25	TSS1500-opensea
cg03032798	male	-0.1551	0.0164942	2.37168e-18	8.6302e-13	2	221298903		IGR-opensea
cg01698448	male	-0.130624	0.0138971	2.43964e-18	8.87751e-13	2	233213824		IGR-shore
cg06841464	male	-0.0236532	0.00251681	2.46242e-18	8.96041e-13	4	174254812	HMGB2	5'UTR-island
cg07826516	male	-0.135479	0.0144216	2.53226e-18	9.21454e-13	5	3106230		IGR-opensea
cg00524374	male	-0.318655	0.0340214	3.09049e-18	1.12459e-12	10	3894968		IGR-opensea
cg17518550	male	-0.200798	0.0214922	3.65531e-18	1.33011e-12	1	247712383	C1orf150	TSS200-opensea
cg10469791	male	-0.124906	0.0133785	3.82851e-18	1.39314e-12	4	42895240	GRXCR1	TSS200-opensea
cg26014409	male	-0.188819	0.0202298	3.90171e-18	1.41978e-12	1	158324471	CD1E	Body-opensea
cg16545821	male	0.356546	0.0382058	3.94233e-18	1.43456e-12	1	204118840	ETNK2	Body-shore
cg20222695	male	0.163147	0.0174914	4.08406e-18	1.48613e-12	12	133323749	ANKLE2	Body-opensea
cg21325822	male	-0.167814	0.0180107	4.3802e-18	1.59389e-12	3	154497591		IGR-opensea
cg05935052	male	-0.0524701	0.00563296	4.4638e-18	1.62431e-12	1	209381144		IGR-opensea
cg05133853	male	-0.150713	0.0161879	4.61335e-18	1.67873e-12	11	5265008	HBBP1	TSS200-opensea
cg15577272	male	-0.203664	0.021924	5.34599e-18	1.94533e-12	7	157932397	PTPRN2	Body-opensea
cg10632969	male	0.0435298	0.00468685	5.4179e-18	1.9715e-12	11	134023334	NCAPD3	Body-opensea
cg09249675	male	0.284552	0.0306499	5.56155e-18	2.02377e-12	19	3401572	NFIC	Body-shelf
cg21919599	male	-0.215508	0.0232764	6.65867e-18	2.423e-12	1	247579312	NLRP3	TSS200-opensea
cg09185911	male	0.236765	0.0255733	6.67429e-18	2.42868e-12	1	1688883	NADK	Body-shelf
cg06833778	male	-0.137317	0.014847	7.14106e-18	2.59853e-12	1	241464644	RGS7	Body-opensea
cg13427361	male	-0.34544	0.0373523	7.1742e-18	2.61059e-12	4	187650301		IGR-shelf
cg10299448	male	-0.0397666	0.00430175	7.3735e-18	2.68311e-12	17	10018532	GAS7	Body-opensea
cg04439215	male	0.273016	0.029539	7.46541e-18	2.71656e-12	13	45768901	KCTD4	5'UTR-opensea
cg26987690	male	0.0733653	0.0079468	8.04245e-18	2.92653e-12	7	907797	UNC84A	Body-shore
cg19351617	male	0.26839	0.0291112	8.79446e-18	3.20018e-12	11	409089	SIGIRR	Body-shore
cg24884084	male	-0.113451	0.0123147	9.23134e-18	3.35915e-12	1	153003198	SPRR1B	TSS1500-opensea
cg14015765	male	-0.144143	0.0156654	9.99813e-18	3.63818e-12	10	132734310		IGR-opensea
cg03368634	male	0.256317	0.0278729	1.03897e-17	3.78065e-12	16	3824553	CREBBP	Body-opensea
cg04089703	male	0.0704204	0.00767122	1.16459e-17	4.23776e-12	22	38471573	PICK1	3'UTR-shore
cg03850035	male	-0.150595	0.0164081	1.1789e-17	4.28984e-12	2	222367110	EPHA4	Body-opensea
cg27269561	male	-0.13048	0.0142339	1.27636e-17	4.64451e-12	16	3072713	HCFC1R1	3'UTR-shore
cg14774511	male	0.243079	0.026538	1.34316e-17	4.88756e-12	12	3371886	TSPAN9	Body-opensea
cg14223485	male	-0.0685214	0.00748733	1.42151e-17	5.17267e-12	9	34454428	C9orf25	Body-shelf
cg27534912	male	-0.151597	0.0165704	1.45178e-17	5.28283e-12	1	158258802	CD1C	TSS1500-opensea
cg04904815	male	-0.0820377	0.00898747	1.67957e-17	6.11171e-12	6	41010654	TSPO2	5'UTR-opensea
cg09315878	male	-0.154286	0.0169214	1.80449e-17	6.56628e-12	1	1152580	SDF4	3'UTR-island
cg04588969	male	0.0410334	0.00450861	2.03023e-17	7.38771e-12	20	36767986	TGM2	Body-opensea
cg01521060	male	0.217897	0.0239546	2.10131e-17	7.64638e-12	11	75476921		IGR-shelf
cg10888337	male	-0.324231	0.0356527	2.13265e-17	7.76043e-12	22	46366859	WNT7B	Body-island
cg24304714	male	-0.155949	0.017174	2.34723e-17	8.54124e-12	1	152779374	LCE1C	TSS1500-opensea
cg04612488	male	-0.0292392	0.00322147	2.41706e-17	8.79534e-12	17	8113907	AURKB	TSS200-island
cg01719079	male	0.256392	0.0282836	2.61794e-17	9.52633e-12	7	1139423	C7orf50	Body-shore
cg09061454	male	0.0406684	0.00449118	2.80559e-17	1.02092e-11	16	31075359	ZNF668	Body-island
cg24451141	male	0.24298	0.0268512	2.92655e-17	1.06493e-11	18	13756072	RNMT	Body-opensea
cg24937685	male	0.232488	0.0257133	3.08727e-17	1.12341e-11	11	129806002	PRDM10	Body-opensea
cg17514199	male	-0.231656	0.0256263	3.12568e-17	1.13739e-11	1	238051451	LOC100130331	Body-opensea
cg10253465	male	-0.253503	0.0280613	3.25767e-17	1.18542e-11	19	45996844	RTN2	Body-shore
cg24638828	male	-0.243187	0.0269221	3.27787e-17	1.19277e-11	7	72974572		IGR-shelf
cg09762252	male	-0.171315	0.0189694	3.32163e-17	1.20869e-11	7	71799220	CALN1	5'UTR-shore
cg05238695	male	0.220792	0.0244484	3.32615e-17	1.21034e-11	21	35883588	KCNE1	1stExon-opensea
cg20282429	male	0.230636	0.0255524	3.4434e-17	1.25301e-11	11	679841	DEAF1	Body-opensea
cg03880458	male	0.289152	0.0320371	3.4545e-17	1.25704e-11	7	100306854		IGR-shelf
cg04978583	male	0.0599238	0.00664544	3.66046e-17	1.33199e-11	1	12091409	MIIP	Body-opensea
cg05626536	male	-0.251964	0.0279512	3.73464e-17	1.35898e-11	8	144801088	MAPK15	Body-island
cg01975877	male	0.178616	0.019829	3.91196e-17	1.42351e-11	1	9324232	H6PD	Body-island
cg06884679	male	0.028931	0.00321416	4.10064e-17	1.49217e-11	6	31750174	VARS	Body-opensea
cg03568041	male	-0.12307	0.0136814	4.26746e-17	1.55287e-11	16	1047623		IGR-island
cg09893016	male	0.253087	0.0281476	4.38829e-17	1.59684e-11	X	10145109	CLCN4	5'UTR-opensea
cg09548780	male	0.353611	0.0393472	4.52772e-17	1.64757e-11	2	218770270	TNS1	5'UTR-opensea
cg14063654	male	0.259432	0.0289165	5.03522e-17	1.83225e-11	9	107587595	ABCA1	Body-opensea
cg20898283	male	0.204466	0.022793	5.07727e-17	1.84755e-11	14	75920198	JDP2	Body-opensea
cg13231302	male	0.16454	0.0183461	5.14358e-17	1.87168e-11	14	103467798	CDC42BPB	Body-opensea
cg12638776	male	-0.0771115	0.00860184	5.29614e-17	1.92719e-11	1	205628183	SLC45A3	3'UTR-shelf
cg00951599	male	-0.142504	0.015904	5.4557e-17	1.98525e-11	5	2683969		IGR-opensea
cg22498365	male	-0.0962981	0.0107483	5.49117e-17	1.99816e-11	17	80829028	TBCD	Body-shore
cg10758369	male	0.344096	0.0384155	5.5737e-17	2.02819e-11	1	48459236		IGR-shore
cg14675963	male	0.0322007	0.00359518	5.59656e-17	2.03651e-11	2	242167043	HDLBP	3'UTR-opensea
cg21765235	male	-0.200084	0.0223397	5.60361e-17	2.03908e-11	11	79024011	ODZ4	5'UTR-opensea
cg10424974	male	0.115793	0.0129344	5.76596e-17	2.09815e-11	16	66388348		IGR-opensea
cg01160557	male	-0.264673	0.0295769	5.9186e-17	2.1537e-11	20	44651777	SLC12A5	Body-shore
cg03708694	male	-0.171932	0.0192223	6.09473e-17	2.21779e-11	11	44489577		IGR-opensea
cg25582353	male	0.2757	0.0308253	6.11622e-17	2.22561e-11	17	37883239	ERBB2	Body-shelf
cg18507365	male	-0.193145	0.0216284	6.73435e-17	2.45054e-11	10	78871502	KCNMA1	Body-opensea
cg05296180	male	0.229537	0.0257184	6.97954e-17	2.53976e-11	14	21161619	ANG	5'UTR-opensea
cg11736657	male	0.207682	0.0232734	7.04897e-17	2.56502e-11	10	5566849	CALML3	TSS200-shore
cg19265913	male	0.155021	0.0173749	7.12214e-17	2.59165e-11	10	81154181	ZCCHC24	Body-opensea
cg24035245	male	0.187053	0.0209858	7.57181e-17	2.75527e-11	1	119535928		IGR-island
cg16408865	male	-0.105119	0.0118041	8.00974e-17	2.91463e-11	12	69753119	YEATS4	TSS1500-shore
cg01666550	male	0.053569	0.00601636	8.08721e-17	2.94282e-11	11	68183850	LRP5	Body-shelf
cg00163018	male	-0.178909	0.0200959	8.14935e-17	2.96543e-11	1	237413813	RYR2	Body-opensea
cg01750783	male	0.248551	0.0279451	8.64816e-17	3.14694e-11	16	88564747	ZFPM1	Body-shore
cg07670266	male	0.282282	0.0317751	9.30318e-17	3.3853e-11	16	2087377	SLC9A3R2	Body-shore
cg23596199	male	0.171155	0.0192698	9.41698e-17	3.42671e-11	1	1281622	DVL1	Body-shelf
cg09472004	male	-0.159435	0.018003	1.12804e-16	4.10478e-11	1	87240156		IGR-opensea
cg26625319	male	-0.0378791	0.00428223	1.21258e-16	4.41243e-11	2	97001960	NCAPH	Body-shore
cg21008808	male	-0.0719235	0.00813377	1.23873e-16	4.50757e-11	11	134093497	VPS26B	TSS1500-shore
cg18545695	male	-0.268503	0.030366	1.2419e-16	4.51912e-11	8	69665987	C8orf34	Body-opensea
cg08906442	male	0.189051	0.0213921	1.28383e-16	4.67169e-11	1	246939499		IGR-opensea
cg16426366	male	0.240945	0.0272663	1.28986e-16	4.6936e-11	8	1919236		IGR-shelf
cg10588425	male	0.053649	0.00607232	1.30547e-16	4.75044e-11	20	62492820	C20orf135	5'UTR-shore
cg00978203	male	0.0522289	0.00591702	1.38129e-16	5.02632e-11	1	26096954	MAN1C1	Body-shore
cg07720334	male	0.0706578	0.00800809	1.41606e-16	5.15283e-11	2	25526752	DNMT3A	Body-opensea
cg26775866	male	-0.195346	0.0221699	1.53886e-16	5.59969e-11	5	159849193	PTTG1	5'UTR-shore
cg12362629	male	-0.123033	0.0139778	1.64103e-16	5.97149e-11	22	36716469	MYH9	Body-shore
cg24530527	male	-0.0751943	0.00856284	1.89191e-16	6.88439e-11	7	1162932	C7orf50	Body-opensea
cg02855850	male	-0.203799	0.023219	1.94807e-16	7.08877e-11	1	152882420	IVL	Body-opensea
cg00298977	male	-0.170377	0.0194114	1.94923e-16	7.09299e-11	1	153175842	LELP1	TSS200-opensea
cg12912920	male	0.230111	0.0262264	1.99201e-16	7.24863e-11	4	140762680	MAML3	Body-opensea
cg05946971	male	-0.0270685	0.00308514	1.99429e-16	7.25695e-11	22	32341328	C22orf24	1stExon-shore
cg09791621	male	-0.203324	0.0232036	2.15519e-16	7.84242e-11	16	1078722		IGR-island
cg20761290	male	-0.117035	0.0133592	2.18424e-16	7.94814e-11	11	60146039	MS4A7	5'UTR-opensea
cg15522677	male	-0.149894	0.0171107	2.19137e-16	7.9741e-11	18	658883	TYMS	Body-shore
cg11191040	male	-0.167354	0.0191377	2.43852e-16	8.87345e-11	1	28907634	SNHG12	Body-shore
cg22057240	male	0.297009	0.0339692	2.45969e-16	8.95048e-11	5	6755843	POLS	3'UTR-shore
cg06094085	male	0.233032	0.0266803	2.62145e-16	9.53909e-11	16	2136269	TSC2	Body-shore
cg26772172	male	-0.115337	0.0132092	2.67081e-16	9.71872e-11	17	77474395	HRNBP3	5'UTR-opensea
cg13747435	male	0.0989609	0.0113371	2.71979e-16	9.89695e-11	9	130631782	AK1	Body-opensea
cg18019810	male	-0.0803723	0.00921232	2.80481e-16	1.02063e-10	2	236619304	AGAP1	Body-opensea
cg26792288	male	0.214681	0.0246105	2.83047e-16	1.02997e-10	16	80578423	DYNLRB2	Body-shelf
cg00262446	male	-0.21567	0.0247243	2.83284e-16	1.03083e-10	4	101439228	EMCN	5'UTR-opensea
cg15391151	male	0.283148	0.0324912	3.00107e-16	1.09205e-10	1	55274185	C1orf177	Body-shelf
cg12082048	male	-0.141757	0.0162695	3.03335e-16	1.10379e-10	2	5576195		IGR-opensea
cg22152887	male	0.0829304	0.00951828	3.04009e-16	1.10625e-10	11	72849944	FCHSD2	Body-shelf
cg06062279	male	0.101124	0.0116168	3.20774e-16	1.16725e-10	16	88920653	GALNS	Body-shelf
cg25504868	male	0.262838	0.0301976	3.23008e-16	1.17538e-10	11	567480		IGR-shore
cg05938409	male	0.391025	0.0449288	3.24663e-16	1.1814e-10	16	85290060		IGR-opensea
cg09305680	male	-0.228095	0.0262085	3.24908e-16	1.18229e-10	8	117778069	UTP23	TSS1500-shore
cg25856811	male	-0.200736	0.023066	3.25769e-16	1.18543e-10	1	152973957	SPRR3	TSS1500-opensea
cg07064050	male	0.257894	0.0296376	3.28333e-16	1.19476e-10	19	19165011	ARMC6	Body-opensea
cg10369896	male	0.210512	0.0242105	3.43338e-16	1.24936e-10	7	1748766	ELFN1	TSS200-opensea
cg27548256	male	0.229793	0.0264368	3.50302e-16	1.2747e-10	19	39217070	ACTN4	Body-shore
cg25778892	male	-0.149951	0.0172764	3.82088e-16	1.39036e-10	7	1250126		IGR-shore
cg27292113	male	-0.0236267	0.00272331	3.92253e-16	1.42735e-10	17	3627709	ITGAE	Body-island
cg13077865	male	-0.275955	0.0318254	4.05484e-16	1.4755e-10	8	105655901		IGR-opensea
cg02080909	male	0.132472	0.0152921	4.28708e-16	1.56001e-10	17	79058333	BAIAP2	Body-opensea
cg02354658	male	0.28452	0.0328536	4.36212e-16	1.58732e-10	5	95151391	GLRX	3'UTR-opensea
cg03619332	male	0.240882	0.0278253	4.46195e-16	1.62364e-10	16	585859	SOLH	5'UTR-shore
cg15002250	male	-0.0711906	0.00822478	4.50269e-16	1.63847e-10	2	236619445	AGAP1	Body-opensea
cg10215032	male	-0.221755	0.0256278	4.58675e-16	1.66905e-10	2	1895407	MYT1L	Body-shore
cg17525357	male	0.0988958	0.0114311	4.63311e-16	1.68592e-10	7	1491380	MICALL2	Body-shore
cg02480685	male	0.165004	0.0191021	5.08016e-16	1.8486e-10	8	96163530	PLEKHF2	5'UTR-opensea
cg23654174	male	-0.0943711	0.0109359	5.38631e-16	1.96e-10	1	47779667	STIL	5'UTR-shore
cg04467119	male	0.20991	0.0243297	5.45207e-16	1.98393e-10	5	1058657	SLC12A7	Body-shore
cg10718056	male	0.200252	0.0232152	5.51982e-16	2.00858e-10	6	28884599	TRIM27	Body-opensea
cg25031205	male	0.246799	0.0286175	5.59053e-16	2.03432e-10	1	1688976	NADK	Body-shelf
cg17979719	male	0.264714	0.0307066	5.7187e-16	2.08095e-10	6	152620697	SYNE1	Body-shelf
cg07169003	male	0.229845	0.0266812	5.9684e-16	2.17182e-10	6	111999442	FYN	Body-opensea
cg12537437	male	0.273126	0.0317075	5.9924e-16	2.18055e-10	11	74871202	SLCO2B1	Body-opensea
cg03776042	male	0.33841	0.0392925	6.04803e-16	2.20079e-10	22	45633117	C22orf9	Body-shelf
cg25329734	male	-0.262312	0.0304618	6.10596e-16	2.22187e-10	17	63160487	RGS9	Body-opensea
cg10732871	male	-0.22804	0.0264833	6.12675e-16	2.22944e-10	19	1102675	GPX4	TSS1500-shore
cg16252995	male	0.252853	0.029367	6.15129e-16	2.23837e-10	17	79991871	RAC3	3'UTR-shore
cg02350535	male	0.261061	0.0303224	6.17636e-16	2.24749e-10	4	1800191	FGFR3	Body-island
cg15416233	male	-0.034471	0.00400513	6.29505e-16	2.29068e-10	10	102505266	PAX2	TSS1500-island
cg25702651	male	-0.266127	0.0309386	6.51223e-16	2.36971e-10	3	192675515		IGR-opensea
cg26894259	male	-0.089012	0.0103508	6.6122e-16	2.40609e-10	1	27817246	WASF2	TSS1500-shore
cg11751344	male	-0.186838	0.0217385	6.82887e-16	2.48493e-10	8	92622592		IGR-opensea
cg10451621	male	0.276392	0.0321821	7.13702e-16	2.59706e-10	8	6345256	MCPH1	Body-opensea
cg07573965	male	0.315593	0.0367729	7.44391e-16	2.70873e-10	22	35656596	HMGXB4	5'UTR-shelf
cg03180953	male	0.103809	0.012101	7.63221e-16	2.77726e-10	16	1842505	IGFALS	Body-island
cg07418387	male	-0.150093	0.0175008	7.74933e-16	2.81987e-10	1	240375464	FMN2	Body-shelf
cg17341370	male	-0.0976423	0.0113911	7.99309e-16	2.90857e-10	6	150068017	NUP43	TSS1500-shore
cg10920632	male	0.117181	0.0136719	8.03938e-16	2.92542e-10	10	5690971	ASB13	Body-opensea
cg04153135	male	0.222602	0.025975	8.09821e-16	2.94682e-10	12	6881118	LAG3	TSS1500-shore
cg11207081	male	0.0669671	0.00782106	8.52149e-16	3.10085e-10	8	145000968	PLEC1	Body-island
cg00510447	male	-0.190572	0.0222605	8.60275e-16	3.13042e-10	16	3071608	TNFRSF12A	Body-shore
cg20366458	male	0.238574	0.0278721	8.68579e-16	3.16064e-10	12	56756561	APOF	1stExon-shelf
cg06380725	male	-0.108391	0.012664	8.72353e-16	3.17437e-10	6	111894647	TRAF3IP2	Body-opensea
cg11400143	male	0.221221	0.0258825	9.45808e-16	3.44166e-10	6	7214480	RREB1	Body-opensea
cg00076313	male	0.279776	0.0327507	9.75304e-16	3.54899e-10	7	1748610	ELFN1	TSS200-opensea
cg27053177	male	0.249894	0.0292664	1.0023e-15	3.64722e-10	2	169508778	LASS6	Body-opensea
cg27456707	male	0.252718	0.0296302	1.06954e-15	3.89192e-10	11	63839511	MACROD1	Body-opensea
cg08426157	male	-0.187003	0.0219261	1.07157e-15	3.89931e-10	7	18794174	HDAC9	Body-opensea
cg02814054	male	-0.0935853	0.0109786	1.10482e-15	4.02029e-10	19	18234911	MAST3	Body-island
cg11393995	male	-0.100075	0.0117478	1.14839e-15	4.17881e-10	6	2842359	SERPINB1	TSS1500-shore
cg16085649	male	0.216741	0.0254534	1.17552e-15	4.27756e-10	15	86186011	AKAP13	Body-opensea
cg14188840	male	0.198828	0.0233529	1.18429e-15	4.30945e-10	7	27220398	HOXA10	TSS1500-shore
cg12083893	male	0.118935	0.013971	1.19346e-15	4.34284e-10	10	91111929		IGR-opensea
cg15022420	male	-0.168159	0.0197545	1.19778e-15	4.35854e-10	7	157322652		IGR-shore
cg13458651	male	-0.285581	0.0335692	1.24078e-15	4.51502e-10	22	46367703	WNT7B	Body-island
cg10169763	male	0.296799	0.0348923	1.25021e-15	4.54932e-10	16	87873389	SLC7A5	Body-opensea
cg10773745	male	0.0538708	0.00633893	1.31772e-15	4.79502e-10	12	123633142		IGR-shore
cg17748092	male	0.218613	0.025727	1.32622e-15	4.82592e-10	19	8586324	MYO1F	3'UTR-opensea
cg16730737	male	-0.29815	0.0351031	1.36167e-15	4.95494e-10	6	31702632	CLIC1	Body-opensea
cg22306173	male	-0.217378	0.0256028	1.3912e-15	5.06237e-10	22	46368025	WNT7B	Body-island
cg27235337	male	0.1314	0.0154778	1.39897e-15	5.09066e-10	1	2334785	RER1	3'UTR-shore
cg13776905	male	0.162143	0.019106	1.42854e-15	5.19825e-10	17	65850328	BPTF	Body-opensea
cg19101566	male	0.322218	0.0379696	1.43124e-15	5.20808e-10	6	46623767	SLC25A27	Body-shelf
cg04730443	male	-0.204664	0.024119	1.43744e-15	5.23063e-10	X	26210529	MAGEB6	TSS200-opensea
cg14747813	male	0.145096	0.0171089	1.48579e-15	5.40657e-10	8	23848786		IGR-opensea
cg00301239	male	-0.185446	0.0218683	1.49181e-15	5.42848e-10	8	103801487		IGR-opensea
cg24232092	male	0.221685	0.0261813	1.62744e-15	5.92202e-10	4	1364344	KIAA1530	Body-island
cg00446003	male	0.321354	0.0379823	1.70268e-15	6.19582e-10	19	2135687	AP3D1	Body-shore
cg06270545	male	0.230911	0.0272997	1.72902e-15	6.29165e-10	15	65385417	LOC390595	3'UTR-opensea
cg07236958	male	-0.161131	0.0190524	1.74238e-15	6.34029e-10	8	140624727		IGR-opensea
cg26967792	male	-0.199996	0.023649	1.74708e-15	6.3574e-10	7	53257327		IGR-shelf
cg05383524	male	0.164274	0.0194296	1.77057e-15	6.44287e-10	16	4726970	MGRN1	Body-shelf
cg07856521	male	-0.200317	0.0236938	1.77596e-15	6.46246e-10	7	71799177	CALN1	5'UTR-shore
cg19095143	male	-0.0961106	0.0113705	1.79776e-15	6.54181e-10	3	51721872	TEX264	Body-opensea
cg18293555	male	0.071224	0.00843547	1.91349e-15	6.96291e-10	22	20229988	RTN4R	Body-island
cg22885052	male	0.180163	0.0213515	1.98533e-15	7.22435e-10	3	47066821	SETD2	Body-opensea
cg06389444	male	-0.118877	0.0140913	2.00957e-15	7.31256e-10	17	77474192	HRNBP3	5'UTR-opensea
cg10772169	male	0.195939	0.0232321	2.03993e-15	7.42302e-10	1	100315213	AGL	TSS1500-shore
cg25792518	male	0.215227	0.0255402	2.13815e-15	7.78043e-10	17	48545950	ACSF2	Body-island
cg10747785	male	0.251751	0.0299189	2.32764e-15	8.46994e-10	22	36681296	MYH9	Body-opensea
cg11558212	male	-0.201007	0.0239067	2.4313e-15	8.84716e-10	13	22810001		IGR-opensea
cg00120825	male	0.254975	0.0303648	2.61725e-15	9.5238e-10	1	2338738	PEX10	Body-shore
cg14720543	male	-0.0813546	0.00969684	2.74881e-15	1.00025e-09	3	11611878	VGLL4	Body-shore
cg05813650	male	0.10146	0.0121145	3.03539e-15	1.10454e-09	1	2339995	PEX10	Body-island
cg05447916	male	-0.0339518	0.00405454	3.06266e-15	1.11446e-09	6	31744831	C6orf27	5'UTR-opensea
cg06419959	male	-0.0201826	0.00241032	3.06977e-15	1.11705e-09	9	140354043	NELF	TSS1500-island
cg01485157	male	0.11117	0.0132971	3.34908e-15	1.21868e-09	16	4431584	VASN	Body-opensea
cg14134732	male	-0.324542	0.0388325	3.41765e-15	1.24363e-09	16	3079894	CCDC64B	Body-island
cg11472786	male	-0.122763	0.0146898	3.42919e-15	1.24783e-09	3	13522261	HDAC11	5'UTR-island
cg15693572	male	-0.157574	0.0188638	3.51551e-15	1.27924e-09	3	22412385		IGR-shore
cg23110109	male	-0.126171	0.0151113	3.60871e-15	1.31316e-09	12	122092127	MORN3	Body-opensea
cg13494489	male	0.244627	0.0293242	3.78928e-15	1.37887e-09	9	124535465	DAB2IP	Body-island
cg21724796	male	-0.0302395	0.00362729	3.93151e-15	1.43062e-09	17	8113904	AURKB	TSS200-island
cg08017323	male	0.264125	0.0316863	3.95859e-15	1.44048e-09	12	3240167	TSPAN9	5'UTR-opensea
cg05784088	male	-0.171033	0.0205351	4.14551e-15	1.50849e-09	1	157738458	FCRL2	Body-opensea
cg21322248	male	-0.119652	0.0143754	4.29721e-15	1.56369e-09	15	77289047	PSTPIP1	Body-opensea
cg01115243	male	0.230809	0.0277438	4.41832e-15	1.60776e-09	16	69353023	VPS4A	Body-shore
cg19368031	male	0.258102	0.031041	4.55104e-15	1.65606e-09	10	76688843	MYST4	Body-opensea
cg13278795	male	-0.0453009	0.00545069	4.67017e-15	1.69941e-09	5	176738672	MXD3	Body-island
cg09088720	male	0.253568	0.0305277	4.82482e-15	1.75568e-09	5	154091976	LARP1	TSS1500-opensea
cg12618910	male	-0.0603674	0.00727059	4.93026e-15	1.79405e-09	3	33155292	CRTAP	TSS200-island
cg22940022	male	0.200249	0.0241301	5.0723e-15	1.84574e-09	7	99691200	MCM7	Body-opensea
cg08368094	male	0.258863	0.0311948	5.08796e-15	1.85144e-09	4	74286665	ALB	3'UTR-opensea
cg18384681	male	-0.106495	0.0128382	5.19334e-15	1.88978e-09	1	55462126		IGR-shore
cg17578755	male	0.0446683	0.0053899	5.472e-15	1.99118e-09	11	1299291	TOLLIP	Body-island
cg26779305	male	0.165968	0.0200349	5.60123e-15	2.03821e-09	17	11985228	MAP2K4	Body-opensea
cg13384409	male	0.0549465	0.0066353	5.71446e-15	2.07941e-09	7	2414466	EIF3B	Body-opensea
cg19619414	male	0.2399	0.0289818	5.84383e-15	2.12649e-09	7	218950	FAM20C	Body-island
cg07723431	male	0.0685752	0.0082912	6.11407e-15	2.22483e-09	19	2044540	MKNK2	Body-shore
cg07698804	male	-0.119933	0.0145034	6.17751e-15	2.24791e-09	17	80829309	TBCD	Body-shore
cg14204677	male	0.121768	0.0147348	6.40127e-15	2.32933e-09	13	110281069		IGR-opensea
cg19289969	male	0.121808	0.0147443	6.51471e-15	2.37061e-09	7	1892989	MAD1L1	Body-shore
cg02835462	male	0.245451	0.0297167	6.58634e-15	2.39668e-09	1	46391567	MAST2	Body-opensea
cg22212560	male	-0.0652403	0.00789969	6.63557e-15	2.41459e-09	11	65175482	FRMD8	Body-shelf
cg05537653	male	0.149484	0.0181146	6.92919e-15	2.52143e-09	11	47612070	C1QTNF4	Body-island
cg19897979	male	-0.0898453	0.0108903	7.02827e-15	2.55749e-09	1	25687812	TMEM50A	3'UTR-opensea
cg23427912	male	-0.181498	0.0220075	7.16597e-15	2.6076e-09	4	189059510	TRIML1	TSS1500-opensea
cg04208175	male	0.149803	0.0181646	7.17224e-15	2.60988e-09	16	4734629	MGRN1	Body-shore
cg06352809	male	0.0725358	0.00879683	7.23458e-15	2.63256e-09	10	124152109	PLEKHA1	5'UTR-opensea
cg16282618	male	-0.17468	0.0211999	7.53028e-15	2.74016e-09	11	129444501		IGR-opensea
cg25214561	male	-0.112456	0.0136483	7.53501e-15	2.74188e-09	3	11494984	ATG7	Body-opensea
cg17497608	male	0.205275	0.0249138	7.54289e-15	2.74475e-09	7	90896701	FZD1	1stExon-shore
cg08855504	male	0.275304	0.0334145	7.56208e-15	2.75174e-09	4	52924627	SPATA18	Body-opensea
cg14687785	male	-0.0669675	0.00813041	7.68287e-15	2.79569e-09	10	119652942		IGR-opensea
cg15763369	male	0.16297	0.0197877	7.72157e-15	2.80977e-09	7	129713963	KLHDC10	Body-shelf
cg04195127	male	-0.0733686	0.00890903	7.75279e-15	2.82113e-09	16	84328719	WFDC1	1stExon-island
cg02167190	male	0.244743	0.0297342	7.97663e-15	2.90258e-09	17	35872723	DUSP14	Body-island
cg16898219	male	0.0532692	0.00647761	8.38407e-15	3.05085e-09	1	21273605	EIF4G3	Body-opensea
cg12004430	male	0.15173	0.0184511	8.39525e-15	3.05491e-09	2	3327257	TSSC1	Body-opensea
cg04070176	male	-0.0691173	0.00840647	8.47774e-15	3.08493e-09	16	3020118	PAQR4	Body-island
cg21499459	male	-0.154329	0.0187943	9.08807e-15	3.30702e-09	4	174254427	HMGB2	Body-shore
cg05777976	male	-0.251392	0.0306149	9.0917e-15	3.30834e-09	11	2163538	IGF2AS	Body-shore
cg04104489	male	0.214918	0.0261749	9.12703e-15	3.3212e-09	1	64063351	PGM1	Body-shelf
cg11865900	male	0.253144	0.0308455	9.37289e-15	3.41066e-09	X	153215934	HCFC1	Body-shelf
cg11533825	male	0.152355	0.0185663	9.42923e-15	3.43116e-09	15	69099444	ANP32A	Body-opensea
cg03858720	male	0.244141	0.029763	9.62815e-15	3.50355e-09	17	21194718	MAP2K3	Body-opensea
cg10577713	male	0.0452804	0.00552542	1.01485e-14	3.69289e-09	1	204401413	PIK3C2B	Body-opensea
cg21037180	male	-0.182516	0.0222882	1.05614e-14	3.84315e-09	8	82276987		IGR-opensea
cg00619188	male	0.223937	0.0273932	1.15924e-14	4.21829e-09	22	37493456	TMPRSS6	Body-shore
cg23021796	male	0.267929	0.0327766	1.16325e-14	4.23289e-09	5	98269394		IGR-shelf
cg09797971	male	0.254969	0.0311914	1.16366e-14	4.2344e-09	20	43730220	KCNS1	TSS1500-shore
cg00594148	male	-0.118733	0.014527	1.17247e-14	4.26644e-09	16	67979437	SLC12A4	Body-opensea
cg00442282	male	-0.15022	0.0183867	1.1976e-14	4.35788e-09	17	38471064	RARA	5'UTR-shore
cg02275396	male	0.278107	0.034061	1.2385e-14	4.50672e-09	19	15554549	WIZ	Body-shelf
cg13852116	male	-0.15521	0.0190145	1.2571e-14	4.57442e-09	10	122403903		IGR-opensea
cg03804240	male	-0.265995	0.0325909	1.26628e-14	4.60783e-09	11	118481350	PHLDB1	5'UTR-island
cg10013324	male	-0.148448	0.0181894	1.26967e-14	4.62014e-09	16	6335194	A2BP1	5'UTR-opensea
cg27519622	male	-0.319803	0.0392271	1.34453e-14	4.89254e-09	16	3079877	CCDC64B	Body-island
cg13480010	male	0.146636	0.0179904	1.3609e-14	4.95212e-09	16	1840830	IGFALS	Body-island
cg22942576	male	0.263686	0.0323534	1.3664e-14	4.97213e-09	1	201476775	CSRP1	TSS1500-shore
cg12067928	male	0.0753611	0.00925192	1.40984e-14	5.13022e-09	12	121166143	ACADS	Body-shelf
cg25748958	male	-0.0822582	0.0101047	1.45606e-14	5.29841e-09	2	43672652	THADA	Body-opensea
cg16218705	male	0.179891	0.0221006	1.46562e-14	5.33317e-09	4	140941031	MAML3	Body-opensea
cg13100600	male	-0.119913	0.0147519	1.57623e-14	5.73568e-09	1	958351	AGRN	Body-shelf
cg14462321	male	0.131497	0.0161821	1.60294e-14	5.83286e-09	9	137232372	RXRA	Body-shelf
cg16161418	male	0.288993	0.0355707	1.62032e-14	5.89613e-09	6	30644798	KIAA1949	3'UTR-shelf
cg17910586	male	-0.10024	0.0123395	1.63016e-14	5.93194e-09	3	52479098	SEMA3G	TSS200-opensea
cg20782252	male	-0.0832318	0.0102504	1.67018e-14	6.07756e-09	7	2153774	MAD1L1	Body-shore
cg25461801	male	0.146502	0.01805	1.70862e-14	6.21744e-09	13	100630316		IGR-shore
cg25235068	male	-0.190575	0.0234953	1.76908e-14	6.43744e-09	8	21642319	GFRA2	Body-shore
cg24168221	male	-0.111779	0.0137899	1.83245e-14	6.66804e-09	20	23587099	CST9	TSS1500-opensea
cg12033297	male	-0.136373	0.0168408	1.93311e-14	7.03431e-09	1	176998801	MIR488	TSS1500-opensea
cg00881370	male	0.312741	0.038621	1.93436e-14	7.03887e-09	19	11348439	LOC55908	TSS1500-opensea
cg07730183	male	0.14114	0.0174356	1.97012e-14	7.16901e-09	16	2136400	TSC2	Body-shore
cg23435821	male	-0.289278	0.0357413	1.9867e-14	7.22933e-09	12	109592934	ACACB	Body-shore
cg18047172	male	0.172191	0.0212868	2.04706e-14	7.44895e-09	7	50670059	GRB10	Body-opensea
cg00716257	male	0.322463	0.0398797	2.09139e-14	7.61027e-09	14	75897417	JDP2	5'UTR-shore
cg06419432	male	-0.160745	0.0198826	2.10745e-14	7.66873e-09	17	25707535		IGR-opensea
cg13595308	male	0.204137	0.0252591	2.14963e-14	7.8222e-09	9	128819105		IGR-opensea
cg05122887	male	0.216541	0.0267976	2.16541e-14	7.87964e-09	15	91424836	FURIN	Body-island
cg20287790	male	0.101426	0.0125563	2.20748e-14	8.03272e-09	1	53359982	ZYG11A	3'UTR-opensea
cg13435834	male	-0.140726	0.0174223	2.21268e-14	8.05165e-09	7	1123508	C7orf50	Body-shelf
cg23558337	male	-0.224288	0.0277837	2.28243e-14	8.30544e-09	20	10492394	C20orf94	Body-opensea
cg17207266	male	0.206964	0.025647	2.32721e-14	8.4684e-09	2	25562957	DNMT3A	5'UTR-shore
cg04073934	male	-0.0617081	0.00764832	2.3507e-14	8.55387e-09	4	3372272	RGS12	Body-shelf
cg09361614	male	0.0566767	0.0070248	2.3522e-14	8.55932e-09	3	12994821	IQSEC1	Body-opensea
cg21117699	male	-0.109932	0.0136309	2.40166e-14	8.7393e-09	7	31474609		IGR-opensea
cg26549174	male	-0.140377	0.0174106	2.43613e-14	8.86473e-09	19	10381355	ICAM1	TSS200-island
cg01395261	male	0.155719	0.0193221	2.49625e-14	9.08349e-09	19	18260515	MAST3	Body-island
cg00128386	male	0.0921394	0.0114427	2.61095e-14	9.50087e-09	16	85665539	KIAA0182	5'UTR-shore
cg00033551	male	0.361966	0.0449598	2.63475e-14	9.58747e-09	16	4738568	MGRN1	3'UTR-opensea
cg20799165	male	-0.149811	0.0186101	2.65061e-14	9.6452e-09	8	136302154	LOC286094	Body-opensea
cg03721528	male	0.253865	0.0315385	2.66112e-14	9.68345e-09	7	120967900	WNT16	TSS1500-shore
cg02919122	male	-0.167752	0.0208576	2.78021e-14	1.01168e-08	3	112109797		IGR-opensea
cg12232903	male	-0.195581	0.0243336	2.87767e-14	1.04714e-08	4	10686413	CLNK	TSS200-opensea
cg10096378	male	0.201209	0.0250548	3.00787e-14	1.09452e-08	22	40391617	FAM83F	Body-shore
cg05245094	male	0.27584	0.03435	3.01738e-14	1.09798e-08	16	85669572	KIAA0182	5'UTR-shore
cg20335309	male	-0.12853	0.0160157	3.11931e-14	1.13507e-08	1	22899442	EPHA8	Body-shelf
cg24304264	male	0.163019	0.0203149	3.13202e-14	1.1397e-08	6	33424075	ZBTB9	Body-shore
cg08655206	male	0.09484	0.0118211	3.16678e-14	1.15235e-08	1	221058198	HLX	3'UTR-shore
cg14516287	male	-0.172091	0.0214589	3.2379e-14	1.17823e-08	9	119987070	ASTN2	Body-opensea
cg07779313	male	-0.240214	0.0299762	3.36946e-14	1.2261e-08	2	192731534		IGR-opensea
cg09860921	male	0.236128	0.029496	3.55351e-14	1.29307e-08	1	45116241	RNF220	Body-shelf
cg10222925	male	-0.219043	0.0273847	3.71256e-14	1.35095e-08	8	88885186	DCAF4L2	1stExon-shore
cg20700235	male	0.258114	0.0322704	3.71893e-14	1.35327e-08	5	1339114	CLPTM1L	Body-shore
cg07272677	male	0.241973	0.0302631	3.78857e-14	1.37861e-08	4	186741447	SORBS2	5'UTR-opensea
cg19717060	male	-0.148243	0.0185499	3.89019e-14	1.41559e-08	17	70553078		IGR-opensea
cg02149965	male	0.161053	0.0201619	3.98418e-14	1.44979e-08	6	30883203	VARS2	Body-shore
cg25747935	male	-0.152394	0.01909	4.11965e-14	1.49908e-08	11	4977540	OR51A2	TSS1500-opensea
cg26738880	male	-0.147977	0.0185384	4.13823e-14	1.50584e-08	7	154429032	DPP6	Body-opensea
cg24979233	male	0.254447	0.0318789	4.1529e-14	1.51118e-08	4	1800284	FGFR3	Body-island
cg25710107	male	0.176044	0.0220656	4.24849e-14	1.54597e-08	13	101187390	A2LD1	TSS1500-shelf
cg11131117	male	0.196438	0.0246326	4.34683e-14	1.58175e-08	7	1891496	MAD1L1	Body-shore
cg23241878	male	-0.218401	0.0274091	4.53507e-14	1.65025e-08	19	42082350	CEACAM21	TSS200-opensea
cg01961752	male	-0.25559	0.032093	4.66051e-14	1.69589e-08	1	1109012	TTLL10	TSS1500-shore
cg22514229	male	0.138841	0.0174347	4.6771e-14	1.70193e-08	1	94118054	BCAR3	Body-opensea
cg23092421	male	0.270376	0.0339569	4.71287e-14	1.71495e-08	19	49253689	FUT1	Body-island
cg27080119	male	-0.159696	0.0200586	4.73953e-14	1.72465e-08	4	120987409	MAD2L1	Body-shore
cg23058194	male	-0.0626455	0.0078696	4.77205e-14	1.73648e-08	15	65369127	LOC390594	TSS200-island
cg08470244	male	0.0437835	0.00550204	4.85867e-14	1.768e-08	1	39917852	MACF1	Body-opensea
cg09476997	male	0.177755	0.0223463	4.95885e-14	1.80446e-08	16	2087932	SLC9A3R2	Body-shore
cg05210671	male	-0.159157	0.0200082	4.95901e-14	1.80451e-08	14	104787388		IGR-opensea
cg05754939	male	0.145392	0.0182785	4.96894e-14	1.80813e-08	11	68181383	LRP5	Body-shore
cg09892262	male	-0.174808	0.0219831	5.04584e-14	1.83611e-08	21	31655654	KRTAP24-1	TSS1500-opensea
cg05889541	male	-0.0810039	0.0101871	5.05678e-14	1.84009e-08	13	103245138		IGR-shelf
cg19787070	male	-0.163282	0.020546	5.20554e-14	1.89422e-08	X	4381263		IGR-opensea
cg07779423	male	-0.194978	0.0245562	5.45209e-14	1.98394e-08	5	1948552		IGR-shore
cg08948808	male	-0.229971	0.0289958	5.77811e-14	2.10257e-08	1	152942003	SPRR4	TSS1500-opensea
cg04736217	male	-0.255139	0.0321868	5.94502e-14	2.16331e-08	6	31804461	C6orf48	5'UTR-shore
cg09636715	male	0.226521	0.0285824	6.00917e-14	2.18665e-08	7	27217057	HOXA10	Body-shelf
cg23423766	male	-0.0509255	0.00643142	6.2881e-14	2.28815e-08	6	13614841	NOL7	TSS1500-shore
cg09813248	male	0.305131	0.03855	6.41373e-14	2.33387e-08	12	121164194	ACADS	Body-shore
cg16352928	male	0.274787	0.03472	6.44795e-14	2.34632e-08	12	6881590	LAG3	TSS200-shore
cg00097800	male	0.03569	0.00451084	6.54647e-14	2.38217e-08	2	46593258	EPAS1	Body-opensea
cg20309703	male	-0.315884	0.0399269	6.56749e-14	2.38982e-08	11	118481025	PHLDB1	5'UTR-island
cg12639234	male	0.202477	0.0256062	6.75071e-14	2.45649e-08	8	18248964	NAT2	5'UTR-shelf
cg20211134	male	-0.171917	0.0217427	6.77049e-14	2.46369e-08	8	138979023		IGR-opensea
cg27142530	male	-0.157772	0.0199544	6.78313e-14	2.46829e-08	4	187266705		IGR-opensea
cg14724492	male	0.113994	0.0144208	6.85984e-14	2.4962e-08	4	1015211	FGFRL1	Body-shelf
cg12649208	male	0.204854	0.0259178	6.89929e-14	2.51055e-08	17	48548533	ACSF2	Body-shore
cg08549332	male	0.219588	0.0277937	7.05261e-14	2.56634e-08	7	101558461	CUX1	Body-shore
cg01113435	male	-0.0737706	0.00933803	7.08064e-14	2.57654e-08	3	52479105	SEMA3G	TSS200-opensea
cg10381113	male	0.200483	0.0253926	7.30095e-14	2.65671e-08	13	24797136	SPATA13	Body-opensea
cg16859906	male	-0.0299823	0.0037979	7.34209e-14	2.67168e-08	16	68298978	SLC7A6	5'UTR-island
cg02464555	male	-0.18635	0.0236058	7.35263e-14	2.67552e-08	7	101922985	CUX1	Body-opensea
cg16928044	male	-0.135848	0.0172088	7.35893e-14	2.67781e-08	1	145589929	NUDT17	TSS1500-shore
cg27065717	male	0.13732	0.0174036	7.54154e-14	2.74426e-08	16	85608934		IGR-opensea
cg08929626	male	0.299628	0.0379807	7.61022e-14	2.76925e-08	8	1896553	ARHGEF10	Body-shelf
cg13622821	male	-0.259809	0.0329538	7.85732e-14	2.85917e-08	6	31702915	CLIC1	Body-opensea
cg27573549	male	0.19334	0.0245328	8.02197e-14	2.91908e-08	19	56189952	EPN1	Body-shelf
cg06989253	male	0.0386086	0.00490092	8.18183e-14	2.97725e-08	1	45976998	PRDX1	3'UTR-opensea
cg10292045	male	0.252062	0.0319995	8.22171e-14	2.99176e-08	11	112137280		IGR-opensea
cg20149022	male	0.270961	0.0344042	8.2896e-14	3.01647e-08	8	1863072	ARHGEF10	Body-opensea
cg25485956	male	0.0173789	0.00220789	8.53739e-14	3.10664e-08	10	81146099	ZCCHC24	3'UTR-island
cg17846122	male	0.188861	0.0239997	8.64896e-14	3.14724e-08	17	64351144	PRKCA	Body-opensea
cg03293308	male	-0.102087	0.0129807	8.92173e-14	3.24649e-08	2	223065390	PAX3	3'UTR-opensea
cg20674248	male	-0.150206	0.0191066	9.10131e-14	3.31184e-08	1	157738450	FCRL2	Body-opensea
cg07834841	male	-0.183729	0.0233776	9.2344e-14	3.36027e-08	10	130185342		IGR-opensea
cg12228061	male	0.268493	0.0341681	9.3073e-14	3.3868e-08	12	116382677		IGR-opensea
cg06649282	male	0.131973	0.0168092	9.72459e-14	3.53864e-08	16	58054982	C16orf57	3'UTR-shelf
cg12669271	male	0.257032	0.0327401	9.75899e-14	3.55116e-08	8	118987299	EXT1	Body-opensea
cg01199928	male	0.236743	0.0301726	1.00419e-13	3.65411e-08	3	127840983	RUVBL1	Body-shore
cg05715828	male	-0.133213	0.016984	1.02288e-13	3.72213e-08	9	131643131	LRRC8A	TSS1500-shore
cg09176194	male	0.15025	0.0191571	1.0255e-13	3.73165e-08	17	2607862	KIAA0664	5'UTR-island
cg02297967	male	-0.128522	0.0163875	1.02805e-13	3.74092e-08	8	57473034		IGR-opensea
cg22579950	male	-0.0944894	0.0120513	1.04189e-13	3.7913e-08	13	50654649	DLEU2	Body-shore
cg09938406	male	-0.201071	0.0256487	1.04997e-13	3.82071e-08	1	2890369		IGR-shelf
cg07753598	male	0.119048	0.0151907	1.0672e-13	3.88339e-08	2	219267634	CTDSP1	Body-shelf
cg19887404	male	-0.169527	0.0216325	1.06879e-13	3.88916e-08	15	87131408	AGBL1	Body-opensea
cg16447680	male	-0.153923	0.0196455	1.08035e-13	3.93126e-08	12	55379100	KIAA0748	TSS1500-opensea
cg20256009	male	-0.134372	0.0171534	1.09088e-13	3.96955e-08	1	153363020	S100A8	5'UTR-opensea
cg03943115	male	-0.0965513	0.0123343	1.13186e-13	4.11868e-08	1	153014367	SPRR2D	TSS1500-opensea
cg25350986	male	-0.0994181	0.0127021	1.13893e-13	4.14442e-08	7	4762844	FOXK1	Body-shore
cg00031708	male	0.282265	0.0360669	1.14442e-13	4.16439e-08	7	23051361	FAM126A	5'UTR-shore
cg06776976	male	-0.259919	0.0332233	1.16499e-13	4.23923e-08	1	212588580	TMEM206	TSS1500-shore
cg10634568	male	-0.147921	0.0189141	1.18545e-13	4.31369e-08	2	30186753		IGR-opensea
cg22749173	male	-0.04082	0.00521982	1.18937e-13	4.32795e-08	19	2614039	GNG7	5'UTR-island
cg02861178	male	-0.274036	0.0350487	1.20071e-13	4.36922e-08	20	10492319	C20orf94	Body-opensea
cg05886367	male	-0.152877	0.0195634	1.23474e-13	4.49305e-08	5	180467233	BTNL9	1stExon-opensea
cg15147833	male	-0.144205	0.0184573	1.24678e-13	4.53686e-08	1	247921672	OR1C1	1stExon-opensea
cg01204058	male	0.0889657	0.0113886	1.25578e-13	4.56962e-08	16	28109836	XPO6	3'UTR-opensea
cg25142327	male	0.129885	0.0166283	1.2615e-13	4.59044e-08	13	113497950	ATP11A	Body-shore
cg02831294	male	0.156257	0.0200143	1.29308e-13	4.70533e-08	10	5566862	CALML3	TSS200-shore
cg14311538	male	0.0204868	0.0026245	1.30401e-13	4.7451e-08	9	139348775	SEC16A	Body-shore
cg03127349	male	-0.156041	0.0199917	1.30989e-13	4.76652e-08	10	31101116		IGR-opensea
cg01569827	male	0.27105	0.0347434	1.34233e-13	4.88454e-08	3	133499158		IGR-shelf
cg03741653	male	0.279499	0.0358271	1.34378e-13	4.88984e-08	8	22033396	BMP1	Body-shore
cg10369242	male	0.340075	0.0436314	1.40649e-13	5.11803e-08	12	52625486	KRT7	TSS1500-shore
cg20246315	male	0.048236	0.006191	1.43363e-13	5.21678e-08	6	30166614	TRIM26	Body-opensea
cg14989316	male	0.161	0.0206655	1.43861e-13	5.2349e-08	10	80757927	LOC283050	Body-opensea
cg17278355	male	0.213154	0.0273641	1.44991e-13	5.27602e-08	7	1746930		IGR-opensea
cg08806644	male	0.0468526	0.00601627	1.46805e-13	5.34202e-08	12	123632825		IGR-shelf
cg18327049	male	0.100504	0.0129113	1.50135e-13	5.46322e-08	14	103470338	CDC42BPB	Body-opensea
cg08884928	male	0.237467	0.0305102	1.51065e-13	5.49703e-08	17	57431996	YPEL2	Body-opensea
cg08737189	male	-0.175695	0.0225803	1.53342e-13	5.5799e-08	7	131223417	PODXL	Body-opensea
cg25598370	male	0.257954	0.0331849	1.61137e-13	5.86354e-08	6	116427195	NT5DC1	Body-opensea
cg17517613	male	0.248535	0.0319842	1.63931e-13	5.96523e-08	12	3371908	TSPAN9	Body-opensea
cg10218510	male	0.247225	0.0318198	1.65019e-13	6.00479e-08	16	88453688		IGR-island
cg18081258	male	0.287557	0.0370252	1.68242e-13	6.1221e-08	14	21494161	NDRG2	TSS1500-island
cg07086179	male	-0.0871204	0.0112179	1.6861e-13	6.13547e-08	16	67979677	SLC12A4	Body-opensea
cg21617903	male	-0.0807775	0.0104042	1.7108e-13	6.22536e-08	3	11599713	VGLL4	3'UTR-opensea
cg05598886	male	0.196485	0.0253078	1.71233e-13	6.23092e-08	16	2140431	PKD1	Body-island
cg12200412	male	-0.0997378	0.0128489	1.72822e-13	6.28874e-08	1	158324331	CD1E	Body-opensea
cg22977072	male	0.163408	0.0210675	1.79593e-13	6.53514e-08	17	79991680	RAC3	Body-shore
cg12406822	male	0.198879	0.0256789	1.93495e-13	7.04103e-08	1	226033550	TMEM63A	3'UTR-opensea
cg27300045	male	-0.206926	0.0267226	1.95189e-13	7.10267e-08	19	47610813	ZC3H4	Body-shelf
cg14557064	male	-0.149907	0.0193949	2.13978e-13	7.78637e-08	5	1752840		IGR-opensea
cg01142668	male	0.267809	0.034652	2.14893e-13	7.81966e-08	16	2086846	SLC9A3R2	Body-island
cg00239071	male	0.233437	0.0302077	2.16001e-13	7.85996e-08	14	100789737	C14orf68	5'UTR-opensea
cg12532001	male	-0.0458561	0.00593425	2.16496e-13	7.87798e-08	13	50654671	DLEU2	Body-shore
cg10735319	male	-0.0707506	0.00915995	2.21382e-13	8.05578e-08	14	65121324		IGR-opensea
cg02867102	male	-0.0907883	0.0117591	2.26016e-13	8.22439e-08	17	62398693		IGR-opensea
cg04214520	male	-0.0740062	0.00958789	2.28882e-13	8.32871e-08	3	195615359	TNK2	Body-shore
cg01425762	male	-0.136817	0.0177359	2.35733e-13	8.57801e-08	16	81666633	CMIP	Body-opensea
cg21836117	male	0.231192	0.0299828	2.40802e-13	8.76244e-08	14	73012519	RGS6	Body-opensea
cg12499311	male	0.239736	0.0310914	2.40979e-13	8.76889e-08	5	134120499	DDX46	Body-opensea
cg04595505	male	-0.0925902	0.0120085	2.41514e-13	8.78837e-08	2	50572944	NRXN1	Body-shore
cg05101437	male	-0.275429	0.0357289	2.43836e-13	8.87286e-08	7	92262970	CDK6	Body-opensea
cg05513226	male	-0.0677894	0.00879468	2.45192e-13	8.92218e-08	12	117147009		IGR-opensea
cg02118755	male	0.24286	0.0315398	2.57936e-13	9.38593e-08	8	1731574	CLN8	3'UTR-shore
cg05210615	male	-0.157597	0.0204676	2.58357e-13	9.40125e-08	17	47512894		IGR-opensea
cg26824326	male	0.0274769	0.00356856	2.58567e-13	9.40888e-08	1	9664366	TMEM201	Body-opensea
cg25149428	male	-0.0155428	0.00201906	2.61333e-13	9.50953e-08	3	50653397	MAPKAPK3	TSS1500-shore
cg26566407	male	0.133687	0.0173672	2.62e-13	9.53381e-08	1	2202931	SKI	Body-opensea
cg26643537	male	0.245923	0.031996	2.82237e-13	1.02702e-07	6	31747023	VARS	Body-opensea
cg07887608	male	-0.0489181	0.00636526	2.83865e-13	1.03295e-07	12	109221600	SSH1	Body-opensea
cg17206555	male	0.335512	0.0436642	2.86153e-13	1.04127e-07	7	90227371		IGR-shore
cg05479174	male	0.0842164	0.0109618	2.88426e-13	1.04954e-07	12	132239000	SFRS8	Body-opensea
cg14486338	male	0.254412	0.0331256	2.93011e-13	1.06623e-07	8	99440279	KCNS2	Body-island
cg20282941	male	-0.0382899	0.00498637	2.95463e-13	1.07515e-07	6	27760082		IGR-opensea
cg24475275	male	0.121496	0.0158273	3.00378e-13	1.09303e-07	6	30644278	KIAA1949	3'UTR-shelf
cg06672226	male	0.148166	0.0193073	3.04767e-13	1.109e-07	16	85611689		IGR-opensea
cg20240931	male	-0.0400482	0.00522125	3.12384e-13	1.13672e-07	19	2613894	GNG7	5'UTR-shore
cg13714749	male	0.197487	0.0257475	3.12511e-13	1.13719e-07	22	40391489	FAM83F	1stExon-island
cg05377387	male	-0.163041	0.0212658	3.19297e-13	1.16188e-07	16	84328658	WFDC1	1stExon-island
cg22114489	male	-0.157776	0.020581	3.20713e-13	1.16703e-07	7	101398177		IGR-opensea
cg16456087	male	0.28228	0.0368326	3.25347e-13	1.18389e-07	3	16343197	OXNAD1	Body-opensea
cg24361256	male	0.168274	0.0219631	3.29896e-13	1.20045e-07	22	50637945	SELO	TSS1500-shore
cg25820257	male	-0.154462	0.020161	3.30547e-13	1.20281e-07	19	45996644	RTN2	Body-shore
cg18151275	male	0.32436	0.0423425	3.32689e-13	1.21061e-07	12	56873616	GLS2	Body-opensea
cg17537493	male	-0.0645399	0.00842519	3.3277e-13	1.2109e-07	11	65172538	FRMD8	Body-island
cg20465661	male	-0.159938	0.0208842	3.37056e-13	1.2265e-07	1	248551409	OR2T6	1stExon-opensea
cg07983907	male	-0.0900522	0.0117587	3.37113e-13	1.22671e-07	16	88697947	ZC3H18	3'UTR-shelf
cg07196505	male	-0.144964	0.0189295	3.37567e-13	1.22836e-07	16	7565837	A2BP1	Body-shelf
cg06081306	male	-0.147121	0.0192226	3.47641e-13	1.26502e-07	17	37760830	NEUROD2	3'UTR-shore
cg09569850	male	0.325935	0.0425879	3.48242e-13	1.2672e-07	2	64955034		IGR-opensea
cg18195165	male	-0.0699299	0.00914563	3.64118e-13	1.32497e-07	7	5549570	FBXL18	Body-shelf
cg22180848	male	0.0295907	0.00387192	3.73258e-13	1.35824e-07	5	71515893	MRPS27	3'UTR-opensea
cg13223209	male	-0.214393	0.0280628	3.79562e-13	1.38117e-07	10	16986391	CUBN	Body-opensea
cg03311556	male	0.230864	0.030248	3.97863e-13	1.44777e-07	4	81108070	PRDM8	5'UTR-shore
cg19197419	male	-0.225935	0.0296164	4.0728e-13	1.48203e-07	20	44441612	UBE2C	1stExon-island
cg08584947	male	-0.187465	0.0245789	4.11649e-13	1.49793e-07	8	93468317		IGR-opensea
cg00655552	male	-0.110831	0.0145358	4.17932e-13	1.5208e-07	4	182862370		IGR-opensea
cg07805542	male	-0.246828	0.0323731	4.18437e-13	1.52263e-07	1	9779309	PIK3CD	Body-shelf
cg07868599	male	-0.278263	0.0365064	4.24263e-13	1.54383e-07	16	3079708	CCDC64B	Body-island
cg23821329	male	-0.322415	0.0423112	4.30353e-13	1.566e-07	10	17269643	VIM	TSS1500-shore
cg05783554	male	-0.185562	0.0243622	4.39485e-13	1.59923e-07	2	232466435		IGR-shelf
cg15063366	male	-0.170919	0.0224486	4.47944e-13	1.63001e-07	2	228683032		IGR-opensea
cg26956535	male	0.101664	0.0133572	4.55465e-13	1.65737e-07	12	6880640	LAG3	TSS1500-shelf
cg11466131	male	0.281766	0.0370349	4.64408e-13	1.68992e-07	22	37954778		IGR-shore
cg01770948	male	0.378269	0.0497511	4.79101e-13	1.74338e-07	16	649132	RAB40C	Body-shore
cg07048592	male	0.0168064	0.0022113	4.88264e-13	1.77673e-07	2	236539618	AGAP1	Body-opensea
cg21597304	male	-0.151851	0.0199843	4.93815e-13	1.79692e-07	15	27021321		IGR-shelf
cg06186808	male	0.221791	0.0291893	4.94129e-13	1.79807e-07	14	24600901	FITM1	1stExon-shore
cg26581504	male	0.3131	0.0412071	4.94718e-13	1.80021e-07	11	112046963	BCO2	TSS200-opensea
cg20889445	male	0.135684	0.0178581	4.9568e-13	1.80371e-07	12	111029566		IGR-opensea
cg16703135	male	0.132806	0.017486	5.04976e-13	1.83754e-07	7	55517132		IGR-island
cg20324165	male	0.104706	0.0137878	5.0774e-13	1.8476e-07	12	53299145	KRT8	TSS1500-shore
cg16724148	male	0.315868	0.041597	5.09651e-13	1.85455e-07	1	100326338	AGL	TSS1500-opensea
cg19052547	male	0.165001	0.0217595	5.45128e-13	1.98364e-07	7	151418881	PRKAG2	Body-shelf
cg05397646	male	0.0440044	0.00580311	5.45272e-13	1.98417e-07	10	13708265	FRMD4A	Body-opensea
cg17810602	male	0.0599788	0.00791066	5.48316e-13	1.99524e-07	1	2224678	SKI	Body-shelf
cg08892613	male	-0.185249	0.0244335	5.49126e-13	1.99819e-07	5	2702419		IGR-opensea
cg04984818	male	0.0906128	0.0119533	5.5349e-13	2.01407e-07	14	104195301	ZFYVE21	Body-shore
cg01687997	male	0.286013	0.0377415	5.61773e-13	2.04421e-07	7	1083072	C7orf50	Body-shore
cg04880940	male	0.164736	0.0217391	5.63071e-13	2.04894e-07	17	34144101	TAF15	Body-opensea
cg24816455	male	-0.23941	0.0315941	5.63668e-13	2.05111e-07	3	50310766	SEMA3B	Body-island
cg09987231	male	0.220577	0.0291162	5.70615e-13	2.07639e-07	14	105923632	MTA1	Body-opensea
cg13733008	male	0.0249669	0.00329576	5.71691e-13	2.0803e-07	4	78088735	CCNG2	3'UTR-opensea
cg13686795	male	0.15266	0.0201522	5.72002e-13	2.08143e-07	7	151522573	PRKAG2	Body-opensea
cg11787789	male	0.0585133	0.00772645	5.80235e-13	2.11139e-07	7	1491464	MICALL2	Body-shore
cg05357131	male	0.223682	0.0295493	5.92571e-13	2.15628e-07	9	124535348	DAB2IP	Body-island
cg10453123	male	0.0365848	0.00483341	5.95101e-13	2.16549e-07	12	57388979	GPR182	5'UTR-opensea
cg23250741	male	0.138789	0.0183422	6.04648e-13	2.20023e-07	19	11348863	DOCK6	Body-opensea
cg19558628	male	0.0700827	0.0092623	6.05351e-13	2.20279e-07	14	24801616	ADCY4	Body-shore
cg13356175	male	-0.133846	0.01769	6.06214e-13	2.20593e-07	1	153413641	S100A7L2	TSS1500-opensea
cg14128411	male	-0.196824	0.0260145	6.07235e-13	2.20964e-07	2	1926907	MYT1L	Body-opensea
cg11348599	male	0.194194	0.0256727	6.13977e-13	2.23418e-07	13	29073223		IGR-shelf
cg15006681	male	-0.195549	0.0258538	6.16113e-13	2.24195e-07	22	38199759	H1F0	TSS1500-shore
cg24475272	male	-0.0877701	0.0116055	6.19555e-13	2.25447e-07	4	140432613	SETD7	3'UTR-opensea
cg20323571	male	-0.142294	0.01882	6.27401e-13	2.28303e-07	1	176999034	MIR488	TSS1500-opensea
cg16256902	male	0.250111	0.0330872	6.34082e-13	2.30734e-07	4	183826405	DCTD	Body-opensea
cg01950958	male	-0.119374	0.0157927	6.35557e-13	2.3127e-07	1	145589783	NUDT17	TSS1500-shore
cg04993112	male	-0.16593	0.0219593	6.45721e-13	2.34969e-07	1	153030514	SPRR2A	TSS1500-opensea
cg18788664	male	0.20335	0.0269136	6.48169e-13	2.3586e-07	1	221068171		IGR-island
cg06297863	male	-0.173078	0.0229095	6.51445e-13	2.37052e-07	6	29626990	MOG	Body-opensea
cg00283857	male	0.0376261	0.00498102	6.55481e-13	2.3852e-07	6	158018184	ZDHHC14	Body-shelf
cg06238055	male	-0.195642	0.0259088	6.66885e-13	2.4267e-07	X	50211642	DGKK	Body-shore
cg05885410	male	-0.153878	0.0203822	6.73503e-13	2.45078e-07	16	88459516		IGR-island
cg04640975	male	0.215184	0.0285077	6.7926e-13	2.47173e-07	19	3464991		IGR-island
cg06144110	male	0.198187	0.0262577	6.81415e-13	2.47957e-07	16	85787176		IGR-shelf
cg17053854	male	-0.0746578	0.00989353	6.8863e-13	2.50583e-07	17	75463180	2024-09-09	Body-opensea
cg23408990	male	-0.175991	0.0233348	7.06832e-13	2.57206e-07	2	222864086		IGR-opensea
cg17069739	male	-0.183327	0.0243145	7.16776e-13	2.60825e-07	6	31703188	CLIC1	Body-opensea
cg06552160	male	-0.190569	0.0252801	7.23688e-13	2.6334e-07	2	1926724	MYT1L	Body-opensea
cg08900409	male	-0.20563	0.0272784	7.24077e-13	2.63481e-07	19	18475669	PGPEP1	3'UTR-opensea
cg04579800	male	-0.0561413	0.0074499	7.34942e-13	2.67435e-07	19	18451220	PGPEP1	TSS200-shore
cg03459811	male	0.0649887	0.00862715	7.48121e-13	2.72231e-07	3	48465320	PLXNB1	Body-opensea
cg21163617	male	-0.151533	0.0201296	7.73033e-13	2.81296e-07	7	157384658	PTPRN2	Body-shelf
cg25305776	male	0.256407	0.0340729	7.85845e-13	2.85958e-07	8	30573560	GSR	Body-opensea
cg04077677	male	-0.0186058	0.00247273	7.90167e-13	2.87531e-07	1	156427412		IGR-shore
cg02776627	male	0.28967	0.0385065	7.99036e-13	2.90758e-07	8	26720076	ADRA1A	Body-shore
cg10495164	male	0.224488	0.0298442	8.02178e-13	2.91901e-07	11	64631357	EHD1	Body-opensea
cg17001958	male	0.140428	0.0186779	8.2071e-13	2.98645e-07	7	1191882		IGR-opensea
cg17650622	male	0.217303	0.0289077	8.27322e-13	3.01051e-07	7	44198725	GCK	1stExon-opensea
cg13915028	male	0.154133	0.0205066	8.31971e-13	3.02743e-07	7	75613107	POR	Body-opensea
cg20718434	male	0.299656	0.0398765	8.40626e-13	3.05892e-07	7	1748597	ELFN1	TSS200-opensea
cg06568323	male	0.276361	0.0367813	8.45906e-13	3.07813e-07	13	100745507	PCCA	Body-shelf
cg20649285	male	-0.18769	0.0249854	8.54701e-13	3.11014e-07	X	134302207	CXorf48	Body-opensea
cg11770323	male	0.195996	0.0260996	8.6802e-13	3.1586e-07	13	80066032	NDFIP2	Body-opensea
cg07977614	male	-0.208979	0.0278293	8.69257e-13	3.1631e-07	1	242310145	PLD5	Body-opensea
cg11880652	male	-0.0161747	0.00215481	8.85783e-13	3.22324e-07	10	102505268	PAX2	TSS200-island
cg02352369	male	-0.168884	0.0225128	9.11992e-13	3.31861e-07	11	97029475		IGR-opensea
cg02350790	male	-0.153199	0.0204297	9.28614e-13	3.37909e-07	10	130366851		IGR-opensea
cg05128038	male	-0.030082	0.00401245	9.38544e-13	3.41523e-07	22	32341390	C22orf24	TSS200-shore
cg07285481	male	0.202368	0.0269946	9.4186e-13	3.4273e-07	16	81667167	CMIP	Body-opensea
cg27596890	male	0.187994	0.0250839	9.53926e-13	3.4712e-07	16	49621173	ZNF423	Body-opensea
cg04574507	male	-0.170023	0.0226905	9.62804e-13	3.50351e-07	1	158301038	CD1B	Body-opensea
cg19404207	male	0.17054	0.0227599	9.63542e-13	3.50619e-07	7	99587136		IGR-opensea
cg06552969	male	0.204351	0.0272863	9.8737e-13	3.5929e-07	16	88453808		IGR-island
cg09628877	male	-0.0551249	0.00736124	9.91047e-13	3.60628e-07	3	195613739	TNK2	Body-island
cg17074353	male	0.187508	0.0250438	9.99406e-13	3.6367e-07	15	69590852	PAQR5	TSS1500-shore
cg04923174	male	-0.149803	0.0200121	1.00954e-12	3.67359e-07	1	158549277	OR10X1	1stExon-opensea
cg27028479	male	0.209801	0.0280332	1.01985e-12	3.71107e-07	16	1866483	HAGH	Body-shelf
cg20035206	male	0.241603	0.0322905	1.03182e-12	3.75464e-07	7	44199106	GCK	Body-opensea
cg27206903	male	0.041466	0.00554506	1.05912e-12	3.85401e-07	17	80006003	RFNG	3'UTR-shelf
cg14495241	male	0.268114	0.0358553	1.06126e-12	3.86179e-07	7	143133624		IGR-opensea
cg04930463	male	0.0793471	0.0106153	1.08091e-12	3.93329e-07	17	79234445	SLC38A10	Body-shore
cg16432031	male	0.146611	0.0196167	1.08774e-12	3.95813e-07	1	12674914	DHRS3	Body-shelf
cg12355887	male	-0.107421	0.0143733	1.08876e-12	3.96186e-07	5	172305927	ERGIC1	Body-opensea
cg25985504	male	0.232645	0.0311473	1.11963e-12	4.07419e-07	15	96303955		IGR-opensea
cg19841005	male	0.12997	0.017403	1.12619e-12	4.09806e-07	19	3687854	PIP5K1C	Body-island
cg23768131	male	0.214317	0.0287188	1.167e-12	4.24655e-07	1	8376931		IGR-shore
cg10195215	male	0.248201	0.0332705	1.18555e-12	4.31405e-07	10	99348244	C10orf62	TSS1500-opensea
cg18404559	male	-0.0936863	0.0125589	1.18794e-12	4.32274e-07	7	151322523	PRKAG2	Body-opensea
cg23415398	male	-0.156282	0.0209542	1.19942e-12	4.36452e-07	2	4583549		IGR-opensea
cg06463800	male	-0.0694383	0.00931043	1.2004e-12	4.36808e-07	13	25754183		IGR-opensea
cg23052437	male	-0.15211	0.0204017	1.2186e-12	4.43432e-07	10	26531942	GAD2	Body-opensea
cg01603247	male	0.0737848	0.00989786	1.22705e-12	4.46505e-07	5	1338340	CLPTM1L	Body-shore
cg22416376	male	0.270735	0.0363362	1.25676e-12	4.57318e-07	8	17395271	SLC7A2	TSS1500-opensea
cg11629889	male	0.166203	0.0223071	1.25802e-12	4.57774e-07	17	40839022	CNTNAP1	Body-island
cg24377133	male	-0.0885452	0.0118866	1.26991e-12	4.62102e-07	8	144170375		IGR-shelf
cg16806210	male	0.242116	0.0325066	1.27773e-12	4.64947e-07	11	118398318	TTC36	1stExon-shelf
cg01467047	male	0.189042	0.025394	1.30898e-12	4.76318e-07	16	86611690	FOXL1	TSS1500-shore
cg19981243	male	0.112964	0.0151747	1.30983e-12	4.7663e-07	3	114478256	ZBTB20	TSS200-opensea
cg21529807	male	-0.0696105	0.009353	1.32352e-12	4.81612e-07	19	42134478	CEACAM4	TSS1500-opensea
cg09368075	male	-0.185898	0.0249817	1.33365e-12	4.85295e-07	2	210011147		IGR-shore
cg13338783	male	-0.194279	0.0261104	1.3395e-12	4.87424e-07	19	46996868	PNMAL2	1stExon-island
cg01955492	male	-0.109239	0.0146827	1.34527e-12	4.89525e-07	6	49110730		IGR-opensea
cg09326087	male	0.215624	0.0289941	1.37223e-12	4.99337e-07	1	227160866	CABC1	Body-shelf
cg26721759	male	-0.178774	0.0240401	1.37516e-12	5.00401e-07	11	133616965		IGR-opensea
cg15847685	male	-0.17838	0.0239952	1.39698e-12	5.08342e-07	4	62129666		IGR-opensea
cg13717684	male	-0.131216	0.0176514	1.3987e-12	5.08968e-07	3	111830803	C3orf52	Body-opensea
cg01279413	male	-0.0873393	0.0117495	1.40179e-12	5.10092e-07	20	62030494		IGR-shore
cg26102295	male	-0.14531	0.0195507	1.41055e-12	5.13278e-07	7	1423622		IGR-shore
cg13869366	male	-0.136307	0.0183426	1.42169e-12	5.17332e-07	11	7869666	OR5E1P	TSS1500-opensea
cg07453778	male	-0.151369	0.0203715	1.42842e-12	5.19782e-07	6	91325155		IGR-shelf
cg03661929	male	-0.136153	0.018331	1.45491e-12	5.29422e-07	3	116503715		IGR-opensea
cg09680447	male	-0.0623264	0.00839147	1.45635e-12	5.29946e-07	4	1037615		IGR-opensea
cg11955845	male	0.234509	0.0315856	1.4822e-12	5.3935e-07	22	36681311	MYH9	Body-opensea
cg02710485	male	0.261829	0.0352685	1.48832e-12	5.41579e-07	8	21911128	EPB49	TSS1500-shelf
cg02864535	male	0.235419	0.0317279	1.5258e-12	5.55216e-07	6	31747053	VARS	Body-opensea
cg24412714	male	-0.112766	0.0151985	1.52927e-12	5.56482e-07	11	4666412	OR51E1	5'UTR-opensea
cg12474881	male	0.250999	0.0338509	1.57538e-12	5.73258e-07	22	36681321	MYH9	Body-opensea
cg01771416	male	0.106574	0.0143747	1.58311e-12	5.76072e-07	3	101567360	NFKBIZ	5'UTR-shore
cg16345226	male	-0.124232	0.0167589	1.59489e-12	5.80357e-07	19	16771394	TMEM38A	TSS1500-island
cg09286981	male	0.138762	0.0187281	1.63131e-12	5.93612e-07	12	3240217	TSPAN9	5'UTR-opensea
cg09608533	male	-0.142582	0.0192569	1.68379e-12	6.12707e-07	10	125618188	CPXM2	Body-shore
cg08383929	male	0.112232	0.0151625	1.70802e-12	6.21524e-07	5	180646754		IGR-island
cg14360448	male	0.179799	0.0242931	1.71532e-12	6.24181e-07	9	139512327		IGR-opensea
cg23167178	male	-0.0126253	0.00170589	1.71769e-12	6.25044e-07	3	126701687		IGR-island
cg09282336	male	0.215565	0.0291289	1.72462e-12	6.27564e-07	16	81526954	CMIP	Body-opensea
cg08667275	male	-0.219946	0.0297297	1.74824e-12	6.36159e-07	11	119209304		IGR-shore
cg20846508	male	-0.131731	0.0178084	1.75996e-12	6.40423e-07	11	368351	B4GALNT4	TSS1500-opensea
cg21865657	male	0.117784	0.0159248	1.76947e-12	6.43885e-07	19	3687751	PIP5K1C	Body-shore
cg26988617	male	-0.1794	0.0242632	1.79567e-12	6.53419e-07	10	34410961	PARD3	Body-opensea
cg18502397	male	-0.120297	0.0162732	1.81406e-12	6.60113e-07	6	45798436		IGR-opensea
cg25631489	male	-0.176219	0.0238443	1.83593e-12	6.68068e-07	3	169900020	PHC3	TSS1500-shore
cg24348240	male	-0.233041	0.0315333	1.83667e-12	6.68339e-07	1	26611453	UBXN11	Body-opensea
cg27118230	male	-0.0468923	0.00634666	1.85764e-12	6.75969e-07	14	50998578	MAP4K5	Body-island
cg24699021	male	-0.132085	0.0178782	1.86338e-12	6.78056e-07	5	172305986	ERGIC1	Body-opensea
cg09381737	male	0.186458	0.0252448	1.88673e-12	6.86554e-07	9	140173549	C9orf167	Body-island
cg03494022	male	0.212788	0.0288139	1.89984e-12	6.91326e-07	18	43992823	RNF165	Body-opensea
cg19526685	male	-0.291406	0.0394603	1.90132e-12	6.91864e-07	8	126963507		IGR-opensea
cg00069261	male	-0.0845446	0.0114491	1.90586e-12	6.93515e-07	16	22386531	CDR2	TSS1500-shore
cg13921444	male	0.12917	0.017493	1.90955e-12	6.94858e-07	4	186733024	SORBS2	5'UTR-opensea
cg05277122	male	0.102307	0.0138594	1.93684e-12	7.04789e-07	14	103538143		IGR-shelf
cg11912215	male	-0.0952251	0.0129009	1.94346e-12	7.07199e-07	2	1377931		IGR-opensea
cg09038962	male	0.269126	0.0364618	1.9463e-12	7.08233e-07	17	77899679		IGR-shore
cg13575682	male	-0.156672	0.0212371	1.99277e-12	7.25141e-07	1	152850698	SMCP	TSS200-opensea
cg09121269	male	-0.105073	0.0142428	1.99337e-12	7.25361e-07	14	74181427	PNMA1	TSS1500-shore
cg08934318	male	0.191529	0.0259646	2.00197e-12	7.2849e-07	1	44583886	KLF17	TSS1500-opensea
cg12769118	male	-0.236036	0.0320009	2.00967e-12	7.31291e-07	1	247712377	C1orf150	TSS200-opensea
cg11902863	male	-0.196413	0.026635	2.03084e-12	7.38993e-07	2	3044737		IGR-opensea
cg00658743	male	-0.160941	0.0218251	2.03223e-12	7.39501e-07	2	620044		IGR-shore
cg04260955	male	-0.0719017	0.00975385	2.06433e-12	7.5118e-07	1	225039676		IGR-opensea
cg03503942	male	-0.16403	0.0222524	2.06808e-12	7.52545e-07	20	1715296		IGR-shore
cg11901362	male	0.192024	0.0260573	2.09444e-12	7.62138e-07	2	3507404	ADI1	Body-shelf
cg02668655	male	-0.165365	0.0224507	2.14214e-12	7.79496e-07	1	241523165		IGR-shelf
cg14424579	male	-0.0121291	0.00164703	2.16248e-12	7.86897e-07	2	27274309	AGBL5	TSS200-island
cg10368052	male	0.019499	0.00264784	2.1634e-12	7.8723e-07	6	33235977	VPS52	Body-shelf
cg16955074	male	0.0932424	0.0126621	2.16665e-12	7.88415e-07	12	121671600	P2RX4	3'UTR-opensea
cg07435215	male	0.22976	0.0312067	2.18497e-12	7.9508e-07	15	41575421	LOC729082	TSS1500-shore
cg12643917	male	0.066609	0.00904708	2.18552e-12	7.95281e-07	1	44715958	ERI3	Body-opensea
cg12614630	male	0.236298	0.0321004	2.20286e-12	8.01591e-07	12	57387318	GPR182	TSS1500-opensea
cg02185007	male	-0.197379	0.0268134	2.20341e-12	8.01791e-07	8	117587078		IGR-opensea
cg17462438	male	0.36988	0.0502688	2.24673e-12	8.17552e-07	1	174864228	RABGAP1L	Body-opensea
cg07926644	male	0.211144	0.0287066	2.28624e-12	8.3193e-07	19	4011511	PIAS4	Body-shelf
cg18310495	male	-0.117491	0.0159788	2.3198e-12	8.44141e-07	10	125615419	CPXM2	Body-shore
cg15710961	male	0.0638878	0.00868904	2.32333e-12	8.45427e-07	6	56572591	DST	Body-opensea
cg16664732	male	0.264939	0.0360622	2.41137e-12	8.77464e-07	19	15615946		IGR-shelf
cg23423230	male	0.107979	0.014699	2.42214e-12	8.81383e-07	21	43327978	C2CD2	Body-island
cg03769116	male	0.203035	0.027645	2.44654e-12	8.9026e-07	19	34833674	KIAA0355	Body-opensea
cg14702215	male	0.049506	0.00674352	2.4946e-12	9.07751e-07	10	13708110	FRMD4A	Body-opensea
cg03872376	male	-0.197679	0.0269298	2.50619e-12	9.11968e-07	1	238053828	ZP4	1stExon-opensea
cg11834106	male	0.264612	0.0360515	2.51706e-12	9.15923e-07	6	31747010	VARS	Body-opensea
cg07611000	male	-0.127785	0.0174098	2.5172e-12	9.15975e-07	11	65342262	EHBP1L1	TSS1500-island
cg20073007	male	-0.114096	0.0155453	2.5208e-12	9.17285e-07	8	143958385	CYP11B1	Body-opensea
cg14842820	male	0.203155	0.0276851	2.54489e-12	9.26052e-07	5	172013425		IGR-opensea
cg03801830	male	0.283955	0.0387092	2.58445e-12	9.40444e-07	7	1748324	ELFN1	TSS1500-opensea
cg11284959	male	-0.123563	0.0168448	2.58827e-12	9.41834e-07	5	86205515		IGR-opensea
cg15450098	male	0.0704321	0.00960254	2.59822e-12	9.45456e-07	1	221057561	HLX	Body-island
cg12910830	male	0.295922	0.0403983	2.7588e-12	1.00389e-06	5	162929657	MAT2B	TSS1500-shelf
cg07939503	male	0.204952	0.0279842	2.78007e-12	1.01163e-06	6	30644235	KIAA1949	3'UTR-shelf
cg06211255	male	-0.152612	0.0208532	2.87606e-12	1.04656e-06	11	65153842	FRMD8	TSS200-island
cg19007019	male	0.158804	0.0217055	2.914e-12	1.06036e-06	10	118647000	KIAA1598	Body-opensea
cg22871227	male	-0.146205	0.0199844	2.91951e-12	1.06237e-06	5	173987519		IGR-opensea
cg12271079	male	0.229081	0.0313361	3.02163e-12	1.09953e-06	10	117997745	GFRA1	Body-opensea
cg01948202	male	-0.133359	0.0182431	3.02767e-12	1.10173e-06	3	122400474	PARP14	Body-shore
cg16978168	male	0.137939	0.0188699	3.03035e-12	1.1027e-06	6	159227784	EZR	Body-opensea
cg14464052	male	-0.14483	0.0198192	3.07576e-12	1.11923e-06	2	237173071	ASB18	TSS200-opensea
cg01889169	male	0.30682	0.0419972	3.11154e-12	1.13225e-06	7	927986	C7orf20	Body-shore
cg08555866	male	0.0914407	0.0125167	3.11573e-12	1.13377e-06	16	3345604		IGR-island
cg11573859	male	-0.109951	0.0150517	3.12887e-12	1.13855e-06	1	28907739	SNHG12	Body-shore
cg11282433	male	-0.200302	0.0274208	3.13121e-12	1.1394e-06	5	178483871		IGR-shelf
cg03975815	male	-0.171924	0.0235375	3.14064e-12	1.14283e-06	1	240270565	FMN2	Body-opensea
cg13293488	male	-0.117996	0.016155	3.14573e-12	1.14469e-06	2	879510		IGR-opensea
cg16859931	male	0.0286598	0.00392497	3.18655e-12	1.15954e-06	7	99691812	MIR25	TSS1500-opensea
cg08207871	male	0.0416658	0.0057081	3.23611e-12	1.17757e-06	7	893586	UNC84A	Body-opensea
cg19265143	male	-0.101205	0.0138765	3.36103e-12	1.22303e-06	1	28907637	SNHG12	Body-shore
cg17923945	male	-0.156315	0.0214342	3.37162e-12	1.22689e-06	5	159656366	FABP6	Body-opensea
cg11343657	male	0.190796	0.0261671	3.40048e-12	1.23739e-06	10	50991889		IGR-opensea
cg15840891	male	-0.236765	0.0324777	3.42874e-12	1.24767e-06	2	102133972		IGR-opensea
cg22321572	male	0.100029	0.0137245	3.46692e-12	1.26156e-06	6	168225923	C6orf124	Body-shore
cg06208834	male	0.121616	0.0166868	3.47056e-12	1.26289e-06	1	243656201	SDCCAG8	Body-shelf
cg01213231	male	-0.0555861	0.00762734	3.47894e-12	1.26594e-06	12	54806218	ITGA5	Body-opensea
cg20042116	male	-0.0899198	0.0123407	3.50764e-12	1.27638e-06	22	24655654	POM121L9P	Body-opensea
cg13592022	male	0.298627	0.0409844	3.50896e-12	1.27686e-06	9	137111068		IGR-opensea
cg17015994	male	-0.122781	0.01686	3.59637e-12	1.30867e-06	8	143961341	CYP11B1	TSS200-opensea
cg07101926	male	0.296328	0.0406992	3.62936e-12	1.32067e-06	15	42697094	CAPN3	Body-opensea
cg03325598	male	0.0447415	0.00614593	3.65336e-12	1.32941e-06	3	12994877	IQSEC1	Body-opensea
cg11114313	male	-0.0490627	0.00673953	3.6536e-12	1.32949e-06	12	109222315	SSH1	Body-opensea
cg27237541	male	-0.195933	0.0269243	3.71454e-12	1.35167e-06	10	26497739	MYO3A	Body-shelf
cg14087574	male	0.146624	0.0201494	3.72167e-12	1.35426e-06	1	1963794		IGR-shore
cg04194054	male	0.0535627	0.00736218	3.75592e-12	1.36673e-06	4	7053957	TADA2B	Body-shore
cg04370834	male	0.259667	0.0356954	3.77624e-12	1.37412e-06	17	21194769	MAP2K3	Body-opensea
cg12032713	male	-0.158017	0.021733	3.86396e-12	1.40604e-06	8	106369363	ZFPM2	Body-opensea
cg05415308	male	0.21433	0.0295087	4.04826e-12	1.47311e-06	15	71406783	CT62	5'UTR-shore
cg18293633	male	0.224389	0.0308984	4.07602e-12	1.48321e-06	16	88453824		IGR-island
cg07267600	male	-0.184287	0.0253786	4.09276e-12	1.4893e-06	12	2750053	CACNA1C	Body-opensea
cg05244013	male	-0.145546	0.0200444	4.10128e-12	1.4924e-06	15	94346066		IGR-opensea
cg17611512	male	0.26735	0.036834	4.17655e-12	1.51979e-06	21	46840066	NCRNA00175	Body-opensea
cg19250790	male	-0.0554151	0.00763542	4.19185e-12	1.52535e-06	19	2614086	GNG7	5'UTR-island
cg08608727	male	0.253864	0.0349868	4.23473e-12	1.54096e-06	12	111799994	FAM109A	3'UTR-shore
cg01618923	male	0.281306	0.0387804	4.29205e-12	1.56182e-06	13	49883335	CAB39L	3'UTR-opensea
cg07774299	male	-0.135631	0.0187033	4.34766e-12	1.58205e-06	1	76253445	RABGGTB	Body-opensea
cg09664216	male	0.121437	0.0167477	4.36782e-12	1.58939e-06	2	240218482	HDAC4	Body-opensea
cg17328880	male	0.205277	0.0283106	4.37048e-12	1.59035e-06	19	17415155	MRPL34	TSS1500-shore
cg02695343	male	0.225228	0.0310649	4.38876e-12	1.59701e-06	12	6881595	LAG3	TSS200-shore
cg06147743	male	0.209247	0.0288713	4.46093e-12	1.62327e-06	20	42835588	C20orf111	Body-shelf
cg02407048	male	0.173637	0.0239592	4.47194e-12	1.62728e-06	7	77046134	PION	TSS1500-shore
cg00347746	male	-0.164444	0.0226945	4.50525e-12	1.6394e-06	19	48970082		IGR-shelf
cg26740230	male	-0.14594	0.0201409	4.506e-12	1.63967e-06	21	31768319	KRTAP13-1	TSS200-opensea
cg14519323	male	0.119317	0.0164681	4.52209e-12	1.64552e-06	9	37432946	GRHPR	Body-opensea
cg09902062	male	-0.171073	0.0236124	4.53124e-12	1.64886e-06	1	152944334	SPRR4	5'UTR-opensea
cg08786003	male	-0.195156	0.0269371	4.53563e-12	1.65045e-06	1	157670710	FCRL3	TSS200-opensea
cg19743522	male	0.218613	0.0301873	4.62117e-12	1.68158e-06	12	113495566	DTX1	TSS200-shore
cg26440142	male	0.0511646	0.00706763	4.69522e-12	1.70852e-06	1	221057573	HLX	Body-island
cg04244985	male	-0.22423	0.0309801	4.7363e-12	1.72347e-06	19	55043845	KIR3DX1	TSS200-opensea
cg23683146	male	0.213243	0.0294713	4.80251e-12	1.74756e-06	12	47057850		IGR-opensea
cg03287126	male	0.222159	0.0307237	4.94571e-12	1.79967e-06	8	10196401	MSRA	Body-shelf
cg11029367	male	-0.11832	0.0163698	5.0348e-12	1.83209e-06	3	124705145	HEG1	Body-opensea
cg08098598	male	0.158709	0.0219587	5.04489e-12	1.83577e-06	17	74940334	MGAT5B	Body-opensea
cg00235887	male	0.311866	0.0431504	5.05215e-12	1.83841e-06	X	9430465	TBL1X	TSS1500-shelf
cg09788352	male	-0.127029	0.0175782	5.08128e-12	1.84901e-06	15	68522666	CLN6	TSS1500-shore
cg01068407	male	-0.128532	0.0177872	5.09293e-12	1.85325e-06	7	150714809	ATG9B	Body-shore
cg17278960	male	0.309861	0.0428939	5.16307e-12	1.87877e-06	1	59775908	FGGY	5'UTR-opensea
cg13364311	male	-0.191229	0.0264835	5.26588e-12	1.91618e-06	2	222333289	EPHA4	Body-opensea
cg13531667	male	-0.213007	0.0295139	5.38098e-12	1.95806e-06	5	112825132	MCC	TSS1500-shore
cg04267184	male	0.245286	0.033992	5.42051e-12	1.97245e-06	20	3023418	GNRH2	TSS1500-shelf
cg00767503	male	0.158499	0.0219713	5.49081e-12	1.99803e-06	16	85881907		IGR-shelf
cg23966361	male	0.0450348	0.00624408	5.54204e-12	2.01667e-06	17	80006606	RFNG	Body-shore
cg21783599	male	0.240478	0.0333438	5.55373e-12	2.02092e-06	6	30881152	VARS2	TSS1500-shore
cg09417937	male	0.0569245	0.0078951	5.62087e-12	2.04535e-06	11	1298918	TOLLIP	Body-shore
cg11616560	male	0.0665466	0.00923314	5.71642e-12	2.08013e-06	17	36873351	MLLT6	Body-opensea
cg08064672	male	0.089946	0.0124907	5.94373e-12	2.16284e-06	14	69367352	ACTN1	Body-opensea
cg19127840	male	-0.24485	0.0340032	5.95214e-12	2.1659e-06	X	65238616	MIR223	TSS200-opensea
cg13224139	male	0.322343	0.0447852	6.07325e-12	2.20997e-06	13	112901929		IGR-opensea
cg20902783	male	0.258508	0.0359198	6.10034e-12	2.21983e-06	14	21494071	NDRG2	TSS1500-island
cg19255333	male	0.0508416	0.0070649	6.11699e-12	2.22589e-06	17	17457745	PEMT	Body-opensea
cg09130674	male	0.304017	0.0422488	6.1354e-12	2.23259e-06	6	39195019	KCNK5	Body-shore
cg12053004	male	0.0887801	0.0123414	6.21824e-12	2.26273e-06	1	221057751	HLX	Body-island
cg09145139	male	-0.0266969	0.00371153	6.24557e-12	2.27268e-06	10	95256412	CEP55	1stExon-island
cg24760577	male	0.268485	0.0373272	6.25462e-12	2.27597e-06	19	45201793	CEACAM16	TSS1500-opensea
cg05019807	male	0.111246	0.0154666	6.25937e-12	2.2777e-06	9	139410393	NOTCH1	Body-shore
cg19974879	male	0.231236	0.0321516	6.28092e-12	2.28554e-06	11	611692	PHRF1	Body-island
cg08037235	male	-0.197576	0.0274743	6.31031e-12	2.29623e-06	7	39013676		IGR-shore
cg01566199	male	0.15596	0.0216895	6.33788e-12	2.30627e-06	1	26197239	PAQR7	1stExon-opensea
cg09269276	male	0.133571	0.0185762	6.34374e-12	2.3084e-06	4	140219912		IGR-shelf
cg12516234	male	0.338389	0.0470648	6.36683e-12	2.3168e-06	X	10144998	CLCN4	5'UTR-opensea
cg10389644	male	-0.087236	0.0121336	6.37633e-12	2.32026e-06	7	1575621	MAFK	5'UTR-shore
cg13230186	male	0.246333	0.0342663	6.40909e-12	2.33218e-06	13	114743606		IGR-island
cg23962746	male	-0.172413	0.0239989	6.59263e-12	2.39897e-06	1	209105888		IGR-opensea
cg03353699	male	0.251285	0.0349868	6.66935e-12	2.42688e-06	6	30644693	KIAA1949	3'UTR-shelf
cg27517823	male	0.171424	0.0238893	6.94254e-12	2.52629e-06	8	97523090	SDC2	Body-opensea
cg14307605	male	-0.171802	0.0239466	7.00182e-12	2.54786e-06	2	226029766		IGR-opensea
cg12699648	male	0.146108	0.0203702	7.07687e-12	2.57517e-06	13	24758155	SPATA13	5'UTR-opensea
cg21259253	male	-0.0239774	0.00334306	7.09181e-12	2.58061e-06	11	2950092	PHLDA2	3'UTR-island
cg24399349	male	0.116001	0.0161738	7.09851e-12	2.58305e-06	7	55517045		IGR-island
cg17840707	male	-0.15206	0.021206	7.16414e-12	2.60693e-06	15	86951099	AGBL1	Body-opensea
cg09500443	male	-0.221667	0.030915	7.183e-12	2.61379e-06	5	180018465	SCGB3A1	5'UTR-island
cg03744357	male	-0.211061	0.02944	7.22763e-12	2.63003e-06	X	99196193	LOC442459	TSS1500-shore
cg26437203	male	-0.106294	0.0148265	7.2296e-12	2.63075e-06	5	2443031		IGR-opensea
cg10504000	male	0.257679	0.0359457	7.25635e-12	2.64048e-06	11	2402391	CD81	Body-shelf
cg16385583	male	-0.142728	0.0199152	7.33576e-12	2.66938e-06	1	247711595	C1orf150	TSS1500-opensea
cg09947611	male	0.193374	0.0269829	7.34663e-12	2.67334e-06	11	1542360	HCCA2	Body-opensea
cg02343602	male	0.180171	0.0251436	7.38549e-12	2.68748e-06	11	2127087		IGR-opensea
cg24381587	male	-0.172777	0.0241266	7.58732e-12	2.76092e-06	1	158736312	OR6N1	1stExon-opensea
cg27168858	male	0.122922	0.0171717	7.7224e-12	2.81007e-06	1	55351659	DHCR24	Body-shore
cg05800014	male	-0.0163418	0.00228342	7.80397e-12	2.83976e-06	1	28845292	SNHG3-RCC1	Body-island
cg06637330	male	-0.0927691	0.0129635	7.82919e-12	2.84893e-06	5	3587851		IGR-shelf
cg19498147	male	0.152933	0.0213712	7.83451e-12	2.85087e-06	6	31598777	BAT2	Body-shore
cg10717610	male	-0.174012	0.0243207	7.8898e-12	2.87099e-06	2	394242		IGR-opensea
cg00571354	male	0.142041	0.0198528	7.89989e-12	2.87466e-06	7	150666767	KCNH2	Body-opensea
cg21441360	male	-0.22945	0.0320731	7.93398e-12	2.88707e-06	13	106426066		IGR-opensea
cg01701585	male	-0.0578031	0.00808067	7.97012e-12	2.90022e-06	16	2263913	PGP	Body-island
cg05009662	male	0.162602	0.0227332	8.00167e-12	2.9117e-06	17	46136650	NFE2L1	Body-island
cg06619959	male	0.217443	0.0304091	8.10159e-12	2.94805e-06	3	9956506	IL17RE	Body-shore
cg27488740	male	-0.127746	0.0178651	8.10186e-12	2.94815e-06	2	78928852		IGR-opensea
cg04008438	male	0.129156	0.0180632	8.11992e-12	2.95472e-06	22	45062245		IGR-shore
cg06320380	male	0.215485	0.0301568	8.35806e-12	3.04138e-06	2	218770208	TNS1	5'UTR-opensea
cg02411582	male	0.197808	0.0276921	8.48041e-12	3.0859e-06	16	27232615	JMJD5	3'UTR-opensea
cg10469980	male	0.154957	0.0217003	8.6017e-12	3.13004e-06	16	85660101	KIAA0182	5'UTR-shore
cg01812894	male	0.147158	0.0206184	8.79281e-12	3.19958e-06	9	75568506	ALDH1A1	TSS1500-opensea
cg13537237	male	0.293176	0.0410803	8.82218e-12	3.21027e-06	2	241908681		IGR-shelf
cg03487983	male	0.249526	0.034996	9.1823e-12	3.34131e-06	14	67729501	MPP5	5'UTR-opensea
cg27351783	male	0.30815	0.0432218	9.21727e-12	3.35404e-06	5	112592733	MCC	Body-opensea
cg19924120	male	-0.158685	0.0222579	9.22398e-12	3.35648e-06	18	76160108		IGR-shore
cg02219997	male	-0.105443	0.014791	9.25175e-12	3.36658e-06	16	84328104	WFDC1	TSS1500-shore
cg13781758	male	0.175418	0.0246074	9.26343e-12	3.37083e-06	3	122823409	PDIA5	Body-opensea
cg06692050	male	0.214975	0.0301569	9.27067e-12	3.37347e-06	10	99532398	SFRP5	TSS1500-shore
cg25090604	male	-0.0589191	0.0082659	9.30313e-12	3.38528e-06	13	113470339	ATP11A	Body-shelf
cg14129589	male	0.214724	0.0301288	9.36679e-12	3.40844e-06	12	3240109	TSPAN9	5'UTR-opensea
cg23481748	male	-0.0664786	0.00932801	9.37219e-12	3.41041e-06	14	58862503	TOMM20L	TSS200-shore
cg10941749	male	0.133406	0.0187198	9.3885e-12	3.41634e-06	15	52030519	LYSMD2	TSS200-shore
cg06114987	male	0.189527	0.0265987	9.44778e-12	3.43791e-06	16	86611714	FOXL1	TSS1500-shore
cg02360514	male	-0.174909	0.0245471	9.44954e-12	3.43855e-06	19	45975990	FOSB	Body-island
cg08739244	male	0.0437677	0.00614372	9.53306e-12	3.46895e-06	1	110171630	AMPD2	Body-opensea
cg16988810	male	-0.120725	0.0169479	9.5724e-12	3.48326e-06	6	31762650	VARS	Body-shore
cg10090568	male	-0.294099	0.0412904	9.60841e-12	3.49637e-06	1	217241497	ESRRG	5'UTR-opensea
cg14718495	male	-0.184359	0.0258889	9.69887e-12	3.52928e-06	3	19268469	KCNH8	Body-opensea
cg16851771	male	-0.0440801	0.00619021	9.71208e-12	3.53409e-06	2	42360170		IGR-opensea
cg22390041	male	0.135695	0.0190585	9.77175e-12	3.5558e-06	1	19226319	ALDH4A1	Body-shelf
cg15819352	male	0.170722	0.0239787	9.78315e-12	3.55995e-06	1	1845940	CALML6	TSS1500-opensea
cg04391048	male	0.123505	0.0173542	9.96535e-12	3.62625e-06	2	18766022	NT5C1B	Body-island
cg21483092	male	0.220969	0.0310548	1.00431e-11	3.65454e-06	4	3371520	RGS12	TSS1500-shelf
cg14377923	male	0.196827	0.0276677	1.0134e-11	3.68764e-06	14	105923665	MTA1	Body-opensea
cg18409302	male	0.111382	0.0156573	1.01471e-11	3.69239e-06	11	2397303	CD81	TSS1500-shore
cg00458878	male	0.152593	0.021451	1.01588e-11	3.69665e-06	7	27260285		IGR-island
cg07494259	male	0.171289	0.024085	1.02668e-11	3.73596e-06	16	71571025	CHST4	Body-opensea
cg07372034	male	-0.185073	0.0260284	1.03571e-11	3.76879e-06	22	48486164		IGR-opensea
cg21457147	male	0.122309	0.0172034	1.04071e-11	3.78699e-06	13	45768695	GTF2F2	Body-opensea
cg22092397	male	-0.119852	0.0168613	1.05019e-11	3.82149e-06	5	1946212		IGR-shelf
cg03324851	male	0.122659	0.0172562	1.05031e-11	3.82194e-06	7	100274414	GNB2	Body-shore
cg05526731	male	0.0362354	0.00509848	1.05685e-11	3.84571e-06	17	185263	RPH3AL	5'UTR-island
cg02634861	male	0.125005	0.0175998	1.08614e-11	3.9523e-06	1	10757954	CASZ1	5'UTR-island
cg08183663	male	0.210989	0.0297124	1.09671e-11	3.99077e-06	10	92783852		IGR-opensea
cg14911395	male	-0.229102	0.0322814	1.12365e-11	4.0888e-06	3	50311213	SEMA3B	Body-island
cg08617970	male	0.198011	0.0279153	1.14977e-11	4.18386e-06	6	30881112	VARS2	TSS1500-shore
cg07554939	male	0.212675	0.0299894	1.161e-11	4.22471e-06	14	103574043	C14orf73	Body-shelf
cg05830416	male	-0.0192034	0.0027079	1.16133e-11	4.22592e-06	9	35665010	C9orf100	Body-shore
cg00804803	male	-0.0603289	0.00850706	1.16138e-11	4.22611e-06	1	10601595	PEX14	Body-opensea
cg00146755	male	0.12042	0.016984	1.17133e-11	4.26231e-06	21	45551519		IGR-shore
cg14231966	male	0.0941725	0.0132853	1.18389e-11	4.30802e-06	15	91424718	FURIN	Body-island
cg22128328	male	0.167782	0.0236703	1.18505e-11	4.31222e-06	7	157389681	PTPRN2	Body-shelf
cg06604467	male	-0.151925	0.0214387	1.19809e-11	4.3597e-06	7	1232088		IGR-opensea
cg19055803	male	-0.0852812	0.0120421	1.23192e-11	4.48279e-06	19	12947164	RTBDN	TSS1500-shore
cg04911669	male	-0.153899	0.0217363	1.24446e-11	4.52841e-06	6	73697178	KCNQ5	Body-opensea
cg14655590	male	0.214288	0.0302676	1.24822e-11	4.54208e-06	9	95993065	WNK2	Body-opensea
cg13888853	male	0.0643609	0.00909313	1.26203e-11	4.59236e-06	9	139387368		IGR-opensea
cg06510261	male	-0.181971	0.0257115	1.26637e-11	4.60816e-06	3	111852227	GCET2	TSS200-opensea
cg09522706	male	0.172028	0.0243081	1.26956e-11	4.61975e-06	7	99691447	MCM7	Body-opensea
cg04302570	male	0.192627	0.027223	1.27808e-11	4.65076e-06	8	21640162	GFRA2	Body-island
cg02072495	male	-0.286594	0.040503	1.27828e-11	4.65148e-06	15	60689285	ANXA2	5'UTR-shore
cg17463564	male	0.288494	0.0407723	1.27935e-11	4.65537e-06	10	384587	DIP2C	Body-shelf
cg23288563	male	0.176242	0.0249171	1.29977e-11	4.7297e-06	14	21491469	NDRG2	Body-shore
cg25516853	male	0.0328084	0.00463869	1.30262e-11	4.74004e-06	6	31591345	BAT2	Body-shelf
cg01348293	male	0.238558	0.0337312	1.30621e-11	4.75311e-06	7	27260113		IGR-island
cg12219434	male	-0.207202	0.0292984	1.30755e-11	4.75801e-06	3	80820415		IGR-shore
cg05929767	male	-0.15937	0.0225365	1.31167e-11	4.77299e-06	2	3012844		IGR-opensea
cg16566899	male	0.0887312	0.0125532	1.33752e-11	4.86704e-06	12	57579382	LRP1	Body-island
cg13845049	male	0.253195	0.0358275	1.34858e-11	4.90728e-06	9	77701327	C9orf95	Body-shore
cg00408285	male	0.181034	0.025619	1.35406e-11	4.92722e-06	16	85670262	KIAA0182	5'UTR-island
cg04787675	male	-0.193287	0.0273557	1.35978e-11	4.94806e-06	12	104683308	TXNRD1	5'UTR-shore
cg09142117	male	0.211522	0.0299401	1.36703e-11	4.97442e-06	16	2079658	SLC9A3R2	Body-shelf
cg10334928	male	0.246457	0.0348913	1.37767e-11	5.01314e-06	14	81865007	STON2	TSS200-opensea
cg11421702	male	-0.0609707	0.00863549	1.40363e-11	5.10762e-06	13	73301012	C13orf37	Body-shore
cg09046979	male	-0.122965	0.0174191	1.41476e-11	5.14812e-06	16	28333134	SBK1	3'UTR-shore
cg19782880	male	-0.135887	0.0192502	1.41627e-11	5.15359e-06	3	9757565	CPNE9	Body-opensea
cg06937491	male	-0.171204	0.0242534	1.41651e-11	5.15446e-06	12	1943722	LRTM2	Body-opensea
cg09837037	male	0.268614	0.0380706	1.44524e-11	5.25902e-06	5	1201602	SLC6A19	TSS200-island
cg21700339	male	0.208557	0.0295625	1.45314e-11	5.28777e-06	17	71204820	FAM104A	3'UTR-opensea
cg13804476	male	0.238129	0.033767	1.47682e-11	5.37394e-06	13	113976694	LAMP1	Body-shore
cg25225070	male	-0.0682608	0.00968281	1.49873e-11	5.45367e-06	11	9587743		IGR-opensea
cg02621528	male	0.2672	0.0379333	1.55197e-11	5.6474e-06	3	133464047	TF	TSS1500-shore
cg19714332	male	0.195987	0.027825	1.55545e-11	5.66007e-06	13	80058898	NDFIP2	Body-shelf
cg18531916	male	-0.164581	0.02337	1.56637e-11	5.69981e-06	10	130124378		IGR-opensea
cg03493668	male	0.28276	0.0401901	1.63275e-11	5.94135e-06	11	77776607	THRSP	3'UTR-opensea
cg03505654	male	-0.192158	0.0273184	1.64817e-11	5.99748e-06	1	247579608	NLRP3	5'UTR-opensea
cg13567156	male	0.298192	0.0424157	1.68626e-11	6.13605e-06	9	137111412		IGR-opensea
cg20059832	male	0.121067	0.0172234	1.6968e-11	6.1744e-06	1	243653657	SDCCAG8	Body-shore
cg12811284	male	-0.173572	0.0247002	1.718e-11	6.25156e-06	1	158688804	OR6K3	TSS1500-opensea
cg05028555	male	-0.160898	0.0228967	1.71836e-11	6.25285e-06	10	110741628		IGR-opensea
cg06586713	male	-0.211959	0.0301697	1.7348e-11	6.3127e-06	7	82581469	PCLO	Body-opensea
cg04607323	male	0.267126	0.0380239	1.7385e-11	6.32615e-06	20	62375208	SLC2A4RG	3'UTR-shore
cg08258867	male	0.220499	0.0313967	1.76205e-11	6.41185e-06	20	62373333	SLC2A4RG	Body-shore
cg26577252	male	-0.224705	0.0319991	1.76994e-11	6.44056e-06	15	99212332	IGF1R	Body-opensea
cg26587228	male	-0.111207	0.0158407	1.79063e-11	6.51584e-06	19	57641846	USP29	Body-opensea
cg26861995	male	-0.114123	0.0162621	1.81927e-11	6.62007e-06	3	127831673	RUVBL1	Body-opensea
cg00322201	male	0.240794	0.0343233	1.84384e-11	6.70946e-06	22	50736855	PLXNB2	5'UTR-shore
cg18113181	male	0.240322	0.0342599	1.85307e-11	6.74307e-06	3	66004205	MAGI1	Body-opensea
cg17445490	male	0.0532124	0.00758789	1.87399e-11	6.81919e-06	1	21642517	ECE1	Body-opensea
cg02983090	male	-0.240661	0.0343229	1.88686e-11	6.86603e-06	16	27437892	IL21R	TSS1500-opensea
cg07804289	male	-0.164475	0.0234667	1.91912e-11	6.98341e-06	1	153114690	SPRR2C	TSS1500-opensea
cg01160695	male	0.245396	0.0350338	1.96979e-11	7.1678e-06	7	862799	UNC84A	5'UTR-island
cg18518804	male	0.186622	0.0266464	1.98088e-11	7.20814e-06	14	91275103	TTC7B	Body-opensea
cg09185399	male	-0.14028	0.0200373	2.01306e-11	7.32523e-06	11	73372479	PLEKHB1	Body-island
cg25112590	male	0.088898	0.0126995	2.02312e-11	7.36185e-06	17	3870415		IGR-shelf
cg08273635	male	0.201341	0.0287685	2.04094e-11	7.4267e-06	15	75091082	CSK	Body-opensea
cg09950812	male	-0.162327	0.0231979	2.05566e-11	7.48026e-06	14	99275649		IGR-opensea
cg17775989	male	-0.251264	0.0359164	2.07675e-11	7.55702e-06	12	5566384	NTF3	Body-opensea
cg04889181	male	0.231227	0.0330842	2.16341e-11	7.87235e-06	8	38643728	TACC1	TSS1500-shore
cg09214953	male	0.0948201	0.0135751	2.21847e-11	8.0727e-06	12	111800702	FAM109A	Body-shore
cg00891541	male	0.198754	0.0284553	2.21977e-11	8.07742e-06	16	68481487	SMPD3	5'UTR-island
cg10614445	male	0.0973535	0.0139399	2.23254e-11	8.12391e-06	2	25526696	DNMT3A	Body-opensea
cg25588725	male	-0.246818	0.0353446	2.2409e-11	8.15431e-06	6	31703139	CLIC1	Body-opensea
cg21423557	male	0.228471	0.0327256	2.26525e-11	8.24291e-06	2	75935530	C2orf3	Body-shelf
cg16873130	male	-0.162726	0.0233101	2.27206e-11	8.2677e-06	7	136586950	CHRM2	5'UTR-opensea
cg14289863	male	0.194836	0.0279103	2.27387e-11	8.27431e-06	9	72872391	SMC5	TSS1500-shore
cg02636004	male	0.0318165	0.00455823	2.28426e-11	8.31211e-06	3	119747339	GSK3B	Body-opensea
cg23731805	male	0.113847	0.0163106	2.28495e-11	8.31463e-06	12	56479243	ERBB3	3'UTR-opensea
cg05840553	male	-0.221001	0.0316638	2.28965e-11	8.33171e-06	9	130212635	RPL12	Body-shore
cg15010544	male	-0.0676553	0.00969408	2.29786e-11	8.36159e-06	3	195613641	TNK2	Body-island
cg26242302	male	0.26733	0.0383197	2.33615e-11	8.50092e-06	11	94926302	SESN3	Body-opensea
cg24537688	male	-0.148778	0.0213278	2.34371e-11	8.52844e-06	2	137250617		IGR-opensea
cg03140557	male	0.1202	0.0172379	2.38281e-11	8.6707e-06	16	595690	SOLH	5'UTR-shore
cg02060465	male	-0.185105	0.0265475	2.38885e-11	8.69268e-06	1	152941727	SPRR4	TSS1500-opensea
cg09426434	male	-0.0847878	0.0121602	2.38955e-11	8.69523e-06	6	166778519	BRP44L	3'UTR-opensea
cg14875014	male	-0.0850394	0.0122	2.42015e-11	8.8066e-06	2	234262710	DGKD	TSS1500-opensea
cg14137354	male	0.193378	0.0277428	2.42092e-11	8.80938e-06	9	95993155	WNK2	Body-opensea
cg21204530	male	-0.0909314	0.0130478	2.43943e-11	8.87674e-06	5	172306136	ERGIC1	Body-opensea
cg08918811	male	-0.0109007	0.00156422	2.44454e-11	8.89532e-06	11	19262251	E2F8	1stExon-shore
cg11086773	male	0.231235	0.0331876	2.46284e-11	8.96192e-06	3	170374502		IGR-shelf
cg12193277	male	0.154336	0.0221508	2.46304e-11	8.96264e-06	22	39547181	CBX7	Body-shore
cg06148264	male	-0.0797859	0.0114517	2.46819e-11	8.98139e-06	6	2841468	SERPINB1	5'UTR-shore
cg21768294	male	0.204205	0.0293111	2.47339e-11	9.0003e-06	15	90754792	SEMA4B	Body-opensea
cg07274253	male	0.262234	0.0376427	2.47938e-11	9.02212e-06	5	10330984		IGR-shelf
cg25786273	male	0.225162	0.0323329	2.51773e-11	9.16167e-06	18	74801026	MBP	Body-shore
cg21584710	male	0.168534	0.0242135	2.57182e-11	9.35851e-06	17	72306141	DNAI2	Body-opensea
cg04507071	male	-0.221362	0.0318316	2.66924e-11	9.71298e-06	10	128152124	C10orf90	Body-opensea
cg10500147	male	0.2588	0.0372156	2.67077e-11	9.71856e-06	12	6881601	LAG3	TSS200-shore
cg15215077	male	-0.0479397	0.00689408	2.67575e-11	9.73669e-06	6	119561839	MAN1A1	Body-opensea
cg15412772	male	0.177518	0.0255313	2.68868e-11	9.78372e-06	17	38175389	MED24	3'UTR-opensea
cg15733309	male	-0.117861	0.0169512	2.68907e-11	9.78513e-06	7	157513707	PTPRN2	Body-opensea
cg01019355	male	0.255831	0.0367966	2.69484e-11	9.80614e-06	13	27712255	USP12	Body-opensea
cg01645729	male	-0.135888	0.0195451	2.69519e-11	9.80741e-06	2	131582240		IGR-opensea
cg06794441	male	0.204544	0.02942	2.69525e-11	9.80765e-06	1	67520733	SLC35D1	TSS1500-shore
cg01826337	male	0.175704	0.0252744	2.70624e-11	9.84761e-06	1	1846001	CALML6	TSS1500-opensea
cg20782724	male	0.108159	0.0155609	2.72475e-11	9.915e-06	7	47518657	TNS3	5'UTR-opensea
cg10487418	male	0.219151	0.0315358	2.74868e-11	1.00021e-05	17	21194806	MAP2K3	5'UTR-opensea
cg03447880	male	-0.156612	0.0225374	2.75349e-11	1.00196e-05	7	31121827	ADCYAP1R1	Body-opensea
cg27531571	male	-0.1923	0.0276782	2.77469e-11	1.00967e-05	17	77905160		IGR-shore
cg21469505	male	-0.123346	0.0177553	2.78681e-11	1.01408e-05	18	47085749		IGR-shore
cg04545835	male	0.224	0.0322471	2.79745e-11	1.01795e-05	14	102675570	WDR20	Body-opensea
cg18566313	male	0.125646	0.0180901	2.81017e-11	1.02258e-05	4	186733428	SORBS2	TSS200-opensea
cg13328496	male	0.268898	0.0387229	2.8346e-11	1.03147e-05	10	81227764		IGR-opensea
cg19403610	male	0.267858	0.0385896	2.88536e-11	1.04994e-05	10	128359014		IGR-opensea
cg26623266	male	0.24249	0.0349359	2.88888e-11	1.05122e-05	17	48745283	ABCC3	3'UTR-opensea
cg15495091	male	-0.0575735	0.00829506	2.89411e-11	1.05313e-05	13	113491819	ATP11A	Body-shore
cg08825223	male	0.0274088	0.00395017	2.92982e-11	1.06612e-05	10	81146193	ZCCHC24	Body-island
cg12148647	male	0.137168	0.0197703	2.93987e-11	1.06978e-05	19	3688036	PIP5K1C	Body-island
cg17157798	male	-0.150806	0.0217373	2.94707e-11	1.0724e-05	12	129595394	TMEM132D	Body-opensea
cg06042148	male	-0.176478	0.0254427	2.97142e-11	1.08126e-05	8	97138161		IGR-opensea
cg18449739	male	0.229415	0.0330779	2.98421e-11	1.08591e-05	12	113495701	DTX1	1stExon-shore
cg01480180	male	0.227011	0.0327313	2.98428e-11	1.08594e-05	7	90896329	FZD1	1stExon-island
cg25174409	male	-0.0553133	0.00797814	3.02908e-11	1.10224e-05	21	41239323	PCP4	TSS200-opensea
cg13896328	male	0.147079	0.0212142	3.03057e-11	1.10278e-05	1	29652476	PTPRU	3'UTR-opensea
cg16782236	male	0.0594434	0.00857445	3.038e-11	1.10549e-05	4	1321463	MAEA	Body-shore
cg22912610	male	-0.119086	0.0171829	3.07711e-11	1.11972e-05	12	67073266	GRIP1	TSS1500-opensea
cg19017581	male	-0.0269153	0.00388494	3.12115e-11	1.13574e-05	2	171181391	MYO3B	Body-opensea
cg19774788	male	-0.0853295	0.0123183	3.14064e-11	1.14283e-05	3	52127988	WDR51A	Body-opensea
cg01416657	male	-0.0815064	0.0117668	3.14603e-11	1.1448e-05	1	205392241	LEMD1	TSS1500-opensea
cg26792080	male	-0.0280662	0.00405209	3.15454e-11	1.14789e-05	2	200324879	SATB2	5'UTR-island
cg16721427	male	-0.123644	0.0178575	3.19992e-11	1.1644e-05	2	4050797		IGR-island
cg01657995	male	-0.223931	0.0323459	3.21836e-11	1.17111e-05	6	31804883	C6orf48	5'UTR-shelf
cg27568165	male	0.0735689	0.0106281	3.23604e-11	1.17755e-05	1	205631978	SLC45A3	Body-island
cg19276318	male	0.275558	0.0398099	3.24061e-11	1.17921e-05	12	56755499	APOF	Body-shore
cg21022395	male	0.263144	0.0380236	3.26602e-11	1.18846e-05	10	112722440	SHOC2	5'UTR-opensea
cg04895475	male	0.133982	0.0193609	3.27215e-11	1.19069e-05	6	160364127		IGR-opensea
cg23214395	male	0.123449	0.0178389	3.27234e-11	1.19076e-05	1	20141778	RNF186	TSS200-opensea
cg01794103	male	-0.123889	0.0179037	3.28142e-11	1.19406e-05	15	78342494	TBC1D2B	Body-opensea
cg04746197	male	-0.0704096	0.0101801	3.34872e-11	1.21855e-05	11	2951300	PHLDA2	TSS1500-island
cg19271658	male	0.102633	0.0148393	3.35116e-11	1.21944e-05	6	33247425	WDR46	Body-shore
cg14426428	male	0.292709	0.042332	3.38467e-11	1.23163e-05	6	106961936	AIM1	Body-shore
cg02330500	male	-0.0836626	0.0121013	3.40687e-11	1.23971e-05	14	95731916	CLMN	Body-opensea
cg05015495	male	0.259927	0.0376059	3.44055e-11	1.25197e-05	5	93957782	ANKRD32	5'UTR-shelf
cg06174078	male	0.121362	0.0175587	3.44209e-11	1.25253e-05	11	1325718	TOLLIP	Body-opensea
cg02063817	male	0.126739	0.018338	3.4523e-11	1.25624e-05	7	27253521		IGR-island
cg04337594	male	0.128152	0.0185426	3.45458e-11	1.25707e-05	11	952928	AP2A2	Body-opensea
cg02355304	male	0.0329121	0.00476224	3.45733e-11	1.25807e-05	7	5536984	MIR589	TSS1500-shelf
cg00673646	male	-0.0966416	0.0139845	3.46655e-11	1.26143e-05	11	59950525	MS4A6A	1stExon-opensea
cg00184461	male	0.160627	0.0232463	3.48358e-11	1.26763e-05	9	139409725	NOTCH1	Body-island
cg02567289	male	-0.164031	0.0237507	3.55543e-11	1.29377e-05	1	247805255		IGR-shelf
cg15156584	male	0.181549	0.0262885	3.56251e-11	1.29635e-05	6	18433220	RNF144B	Body-opensea
cg20122492	male	0.102643	0.0148635	3.56978e-11	1.29899e-05	2	165555694	COBLL1	Body-opensea
cg09652526	male	-0.188554	0.027306	3.58017e-11	1.30278e-05	20	57833352	ZNF831	3'UTR-opensea
cg17263916	male	0.0947725	0.0137255	3.5884e-11	1.30577e-05	5	138704493	PAIP2	3'UTR-opensea
cg16788099	male	-0.0373339	0.00540788	3.61485e-11	1.31539e-05	11	67141792	LOC100130987	Body-shore
cg02862121	male	0.163329	0.0236591	3.61884e-11	1.31684e-05	16	1845460	IGFALS	TSS1500-shelf
cg14275340	male	-0.10512	0.015228	3.62612e-11	1.3195e-05	14	58862450	TOMM20L	TSS200-shore
cg22911200	male	-0.156718	0.022704	3.63563e-11	1.32296e-05	8	139124425		IGR-opensea
cg20874785	male	0.168732	0.0244515	3.67861e-11	1.33859e-05	2	74612674	LOC100189589	TSS200-opensea
cg03760951	male	-0.218751	0.0317073	3.71417e-11	1.35154e-05	11	2160875	INS-IGF2	Body-island
cg20568305	male	-0.0843137	0.0122217	3.72318e-11	1.35481e-05	22	47070251	GRAMD4	Body-shore
cg08831401	male	0.212931	0.0308683	3.73766e-11	1.36008e-05	1	3283488	PRDM16	Body-opensea
cg20495365	male	0.145051	0.0210286	3.74313e-11	1.36207e-05	4	3371291	RGS12	TSS1500-shelf
cg14660539	male	-0.0621824	0.00901536	3.7521e-11	1.36534e-05	6	3280635	SLC22A23	Body-opensea
cg27590787	male	-0.119193	0.017282	3.7613e-11	1.36868e-05	X	152931217		IGR-shelf
cg13365022	male	-0.153824	0.0223039	3.7674e-11	1.3709e-05	18	58039932	MC4R	1stExon-opensea
cg23731992	male	0.0578813	0.00839439	3.80068e-11	1.38301e-05	10	13708083	FRMD4A	Body-opensea
cg07313373	male	-0.161207	0.0233816	3.81471e-11	1.38812e-05	1	247579131	NLRP3	TSS1500-opensea
cg05777583	male	-0.0893997	0.0129712	3.87062e-11	1.40846e-05	1	157716415	FCRL2	3'UTR-opensea
cg13670288	male	0.218535	0.031721	3.93786e-11	1.43293e-05	11	2176877	INS-IGF2	Body-island
cg11390489	male	0.243251	0.0353116	3.95208e-11	1.43811e-05	8	62568172	ASPH	Body-opensea
cg26464439	male	0.154582	0.0224399	3.95245e-11	1.43824e-05	7	100173533	LRCH4	Body-shore
cg07909128	male	-0.177554	0.0257764	3.96327e-11	1.44218e-05	1	152957379	SPRR1A	5'UTR-opensea
cg20288000	male	0.241446	0.0350524	3.96499e-11	1.4428e-05	1	10735169	CASZ1	Body-opensea
cg13999606	male	-0.0932715	0.0135421	3.97998e-11	1.44826e-05	14	58862457	TOMM20L	TSS200-shore
cg18469813	male	0.249037	0.0361619	3.99903e-11	1.45519e-05	6	168148018		IGR-opensea
cg03515897	male	0.22575	0.0327805	3.99975e-11	1.45545e-05	14	95980971		IGR-shore
cg03304660	male	-0.123124	0.0178826	4.0382e-11	1.46944e-05	7	157586219	PTPRN2	Body-shore
cg26894854	male	0.143446	0.0208348	4.04199e-11	1.47082e-05	1	205631084	SLC45A3	Body-shore
cg20168964	male	-0.0986662	0.0143346	4.08658e-11	1.48705e-05	12	130333393	TMEM132D	Body-opensea
cg01612158	male	-0.163292	0.0237247	4.09466e-11	1.48999e-05	1	157567720	FCRL4	1stExon-opensea
cg07448909	male	0.060669	0.00881573	4.11606e-11	1.49778e-05	10	131361540	MGMT	Body-opensea
cg26429629	male	-0.0804464	0.0116908	4.13367e-11	1.50419e-05	5	169758391	LOC257358	TSS200-opensea
cg08349804	male	0.175388	0.0254891	4.14074e-11	1.50676e-05	12	6929591	GPR162	TSS1500-shelf
cg05393733	male	0.233647	0.0339578	4.15023e-11	1.51021e-05	16	87877300	SLC7A5	Body-opensea
cg05075308	male	-0.0786333	0.0114316	4.1984e-11	1.52774e-05	4	185329364	IRF2	Body-opensea
cg06986263	male	-0.191243	0.0278032	4.20181e-11	1.52898e-05	1	42609124		IGR-shelf
cg03303585	male	-0.260357	0.0378706	4.29134e-11	1.56156e-05	4	75585178		IGR-opensea
cg19413725	male	0.258925	0.0376733	4.34284e-11	1.5803e-05	4	152351973	FAM160A1	5'UTR-opensea
cg12240515	male	0.0389067	0.00566202	4.37919e-11	1.59353e-05	8	132944153	EFR3A	Body-opensea
cg20205704	male	0.202841	0.0295201	4.38515e-11	1.5957e-05	17	2213196	SRR	5'UTR-opensea
cg00718107	male	-0.162759	0.0236885	4.39805e-11	1.60039e-05	8	105337856		IGR-opensea
cg10854423	male	-0.222396	0.0323733	4.42581e-11	1.61049e-05	11	100275402		IGR-opensea
cg18541077	male	-0.0489319	0.00712361	4.44628e-11	1.61794e-05	4	3432546	RGS12	Body-opensea
cg09140531	male	-0.143924	0.0209553	4.46819e-11	1.62591e-05	6	48078914		IGR-opensea
cg23591609	male	0.266946	0.0388795	4.52575e-11	1.64686e-05	12	70092840	BEST3	5'UTR-opensea
cg17718377	male	0.239094	0.0348272	4.54853e-11	1.65515e-05	12	113495619	DTX1	TSS200-shore
cg25416582	male	-0.155508	0.0226569	4.59029e-11	1.67034e-05	5	2095032		IGR-opensea
cg13707793	male	0.301679	0.0439568	4.60521e-11	1.67577e-05	5	139045301	CXXC5	5'UTR-shelf
cg17557340	male	0.135939	0.0198168	4.69732e-11	1.70929e-05	11	1326583	TOLLIP	Body-shelf
cg24700485	male	-0.065225	0.00950898	4.71015e-11	1.71396e-05	15	53090546		IGR-shelf
cg08751950	male	0.230169	0.0335594	4.7308e-11	1.72147e-05	7	2416396	EIF3B	Body-shelf
cg22455529	male	0.130929	0.0190949	4.78277e-11	1.74038e-05	17	73495353	KIAA0195	Body-shelf
cg26234876	male	0.189905	0.0276981	4.79677e-11	1.74548e-05	11	66491629		IGR-shelf
cg05437692	male	0.168037	0.0245089	4.79875e-11	1.7462e-05	4	149362435	NR3C2	5'UTR-shore
cg12484113	male	0.211345	0.0308257	4.80002e-11	1.74666e-05	1	27898757	AHDC1	5'UTR-shelf
cg00301372	male	-0.127013	0.0185282	4.8296e-11	1.75742e-05	2	139654347		IGR-opensea
cg20565727	male	-0.0717893	0.0104726	4.8334e-11	1.75881e-05	17	77461480	HRNBP3	5'UTR-shore
cg19556599	male	0.033177	0.00484065	4.8661e-11	1.7707e-05	5	872256	BRD9	Body-opensea
cg09274392	male	0.29041	0.0423728	4.87031e-11	1.77224e-05	15	71800893	THSD4	Body-opensea
cg03703733	male	0.209068	0.0305075	4.88964e-11	1.77927e-05	6	168147981		IGR-opensea
cg08954025	male	-0.145281	0.0212047	4.93877e-11	1.79715e-05	7	157605684	PTPRN2	Body-opensea
cg13620631	male	-0.177861	0.0259624	4.95785e-11	1.80409e-05	9	87489528	NTRK2	3'UTR-opensea
cg05338976	male	0.29223	0.0426733	5.03598e-11	1.83252e-05	7	114561850	MDFIC	TSS1500-shore
cg08220753	male	0.136453	0.0199264	5.04302e-11	1.83508e-05	16	648872	RAB40C	Body-shore
cg10143416	male	0.102233	0.0149302	5.05534e-11	1.83957e-05	2	241907034		IGR-shore
cg07661480	male	0.121753	0.0177812	5.06023e-11	1.84135e-05	18	46447737	SMAD7	3'UTR-island
cg11680605	male	0.172147	0.0251429	5.07575e-11	1.84699e-05	15	74501317	STRA6	1stExon-opensea
cg05141341	male	0.0566978	0.00828129	5.08346e-11	1.8498e-05	7	44796036	ZMIZ2	Body-opensea
cg22420044	male	0.216262	0.0315932	5.12286e-11	1.86414e-05	7	99691385	MCM7	Body-opensea
cg04321240	male	-0.134105	0.0195919	5.1318e-11	1.86739e-05	15	87516203	AGBL1	Body-opensea
cg26589665	male	0.167584	0.0244929	5.21586e-11	1.89798e-05	15	71623290	THSD4	Body-opensea
cg03813377	male	-0.202344	0.0295978	5.39723e-11	1.96397e-05	6	30737455		IGR-opensea
cg24509815	male	0.242729	0.0355095	5.42428e-11	1.97382e-05	22	37523151	IL2RB	3'UTR-opensea
cg11285496	male	0.274876	0.0402389	5.57103e-11	2.02722e-05	5	81882123		IGR-opensea
cg26047066	male	0.198278	0.0290312	5.61294e-11	2.04247e-05	1	221069136		IGR-island
cg25887619	male	0.156447	0.0229101	5.65062e-11	2.05618e-05	7	101558435	CUX1	Body-shore
cg02600772	male	-0.198286	0.029044	5.70486e-11	2.07592e-05	X	80259473		IGR-island
cg12142865	male	0.0665872	0.00975439	5.72952e-11	2.08489e-05	12	112211993	ALDH2	Body-opensea
cg20874324	male	0.233222	0.0341711	5.77248e-11	2.10052e-05	2	62930083	EHBP1	5'UTR-shelf
cg13946929	male	0.207879	0.0304659	5.83435e-11	2.12304e-05	1	205477308	CDK18	5'UTR-shelf
cg10095533	male	0.349463	0.0512208	5.85711e-11	2.13132e-05	16	88565080	ZFPM1	Body-shore
cg01765174	male	0.137713	0.0201863	5.87616e-11	2.13825e-05	9	100880960	TRIM14	Body-shore
cg07050101	male	0.150496	0.0220634	5.91425e-11	2.15211e-05	7	862776	UNC84A	5'UTR-island
cg23986185	male	0.282768	0.0414579	5.92944e-11	2.15764e-05	17	72436456	GPRC5C	Body-opensea
[truncated: 2,459 more rows]

## Sheet: LUAD
CpG	sex	meanDiff	ses	pval	bonf	CHR	MAPINFO	gene	feat.cgi
cg00781839	female	0.171598	0.00693963	5.09003e-69	1.89908e-63	13	114127083	DCUN1D2	Body-opensea
cg12739119	female	0.200282	0.00820067	4.54863e-68	1.69708e-62	1	43770523	TIE1	Body-island
cg08328160	female	0.176057	0.00734503	1.20823e-66	4.50788e-61	6	32151394	AGER	Body-opensea
cg05027258	female	0.191411	0.00840265	7.44173e-63	2.7765e-57	2	9459293	ASAP2	Body-island
cg23209302	female	0.161107	0.00726617	6.83993e-61	2.55196e-55	1	1326152	CCNL2	Body-shelf
cg20568402	female	0.200221	0.00931662	1.14291e-58	4.26416e-53	13	114126476	DCUN1D2	Body-opensea
cg24251800	female	0.16782	0.00785508	2.96652e-58	1.1068e-52	17	47675686		IGR-opensea
cg04762412	female	0.175432	0.00826595	8.62471e-58	3.21786e-52	20	44691505	NCOA5	Body-shelf
cg26908825	female	0.177874	0.00842999	2.19798e-57	8.2006e-52	6	1635818	GMDS	Body-opensea
cg09325711	female	-0.254798	0.0127222	7.95942e-54	2.96964e-48	7	39662764	RALA	TSS1500-island
cg06569947	female	0.122613	0.0062453	1.67465e-52	6.24807e-47	13	114126889	DCUN1D2	Body-opensea
cg18505593	female	0.166715	0.00857069	6.79793e-52	2.53629e-46	14	100059479	CCDC85C	Body-opensea
cg13020466	female	0.114936	0.00591129	7.25058e-52	2.70518e-46	17	76416705	PGS1	3'UTR-opensea
cg03915012	female	0.164632	0.00853161	2.26122e-51	8.43655e-46	4	902074	GAK	Body-shelf
cg06801994	female	0.167566	0.00872063	4.26622e-51	1.59172e-45	13	113834082	PCID2	Body-opensea
cg15488143	female	0.135393	0.0070656	6.41478e-51	2.39334e-45	7	128924101	AHCYL2	Body-opensea
cg23221540	female	0.0977107	0.0051186	1.13128e-50	4.22077e-45	5	1092417	SLC12A7	Body-shore
cg20510600	female	0.144292	0.0075724	1.47776e-50	5.5135e-45	1	54820824	SSBP3	Body-shore
cg15698065	female	0.15332	0.00809774	3.79943e-50	1.41756e-44	13	114127206	DCUN1D2	Body-opensea
cg11302791	female	0.1909	0.010149	9.97571e-50	3.72192e-44	8	10635419	PINX1	Body-opensea
cg10853830	female	0.165784	0.00885357	1.92982e-49	7.20013e-44	11	67266176	PITPNM1	Body-shelf
cg08331427	female	0.105265	0.00562862	2.31554e-49	8.63922e-44	5	138842004	ECSCR	Body-opensea
cg08113562	female	-0.250526	0.0134599	4.63621e-49	1.72976e-43	17	43508428	SH3D20	5'UTR-island
cg02627286	female	0.181795	0.00978697	6.21684e-49	2.31949e-43	16	89590583	SPG7	Body-shore
cg01399319	female	0.109025	0.0058764	7.39715e-49	2.75986e-43	1	1326204	CCNL2	Body-shelf
cg00121884	female	0.125133	0.00674863	8.06064e-49	3.00741e-43	20	3799732	C20orf29	TSS1500-shore
cg12003230	female	0.12503	0.00676292	1.23381e-48	4.60333e-43	21	44899139	C21orf84	TSS1500-opensea
cg01302240	female	0.186769	0.0101473	2.33803e-48	8.72313e-43	9	116263669	RGS3	TSS200-opensea
cg09010802	female	0.103023	0.0056089	3.14755e-48	1.17434e-42	1	156776671	SH2D2A	3'UTR-opensea
cg14836636	female	-0.107032	0.00583102	3.46346e-48	1.29221e-42	12	120106292	PRKAB1	Body-shore
cg00251824	female	0.100055	0.00546283	4.73744e-48	1.76753e-42	8	641466	ERICH1	Body-shelf
cg11755933	female	0.204608	0.0111714	4.74922e-48	1.77192e-42	11	67266128	PITPNM1	Body-shelf
cg07076109	female	0.14271	0.0077984	5.35562e-48	1.99817e-42	7	4747261	FOXK1	Body-opensea
cg05945615	female	-0.106187	0.00584321	1.45141e-47	5.41518e-42	22	38035456	SH3BP1	TSS1500-island
cg16110314	female	0.0897454	0.00495502	2.33531e-47	8.71298e-42	1	246203683	SMYD3	Body-opensea
cg18613031	female	0.100902	0.00558767	3.56744e-47	1.331e-41	10	45967496	2024-03-08	Body-opensea
cg10725623	female	0.111473	0.00620043	6.67132e-47	2.48906e-41	6	32131571	EGFL8	TSS1500-shelf
cg11114465	female	0.106575	0.0059311	7.18112e-47	2.67926e-41	3	194360708		IGR-opensea
cg06491116	female	-0.152424	0.00850496	1.03945e-46	3.87817e-41	11	118122715	MPZL3	Body-opensea
cg20133191	female	0.140336	0.00784802	1.42426e-46	5.31388e-41	7	2638016	IQCE	Body-opensea
cg27616751	female	0.17742	0.00994246	1.90482e-46	7.10683e-41	7	100883077	FIS1	3'UTR-opensea
cg03286774	female	0.17695	0.00992009	2.01519e-46	7.51864e-41	16	89590357	SPG7	Body-shore
cg19586165	female	0.138061	0.00775259	2.53506e-46	9.45828e-41	17	37814072	STARD3	Body-opensea
cg08137085	female	0.216929	0.0121929	2.89661e-46	1.08072e-40	7	1117540	C7orf50	Body-shelf
cg08171483	female	0.199962	0.0112519	3.38716e-46	1.26374e-40	3	38010391	CTDSPL	Body-opensea
cg08937613	female	0.122169	0.0068879	4.44734e-46	1.65929e-40	4	881914	GAK	Body-shelf
cg08943107	female	0.171408	0.00967264	5.03937e-46	1.88018e-40	1	39943966	MACF1	Body-opensea
cg15628956	female	-0.189279	0.0108527	4.57721e-45	1.70775e-39	12	53448234	TENC1	Body-island
cg20935317	female	0.120572	0.00693355	6.84554e-45	2.55406e-39	1	10739184	CASZ1	Body-opensea
cg23413697	female	-0.271837	0.0157125	1.38002e-44	5.14881e-39	7	5602639		IGR-island
cg23037321	female	-0.223164	0.0129371	2.05788e-44	7.67789e-39	1	181003203	MR1	1stExon-opensea
cg27125965	female	0.168613	0.00978363	2.33099e-44	8.69689e-39	19	11707246	ZNF627	TSS1500-shore
cg17858500	female	0.202259	0.0117478	2.67654e-44	9.98611e-39	20	3734725	C20orf27	Body-shore
cg24030037	female	0.210363	0.0122324	3.12076e-44	1.16435e-38	8	27457282	CLU	Body-opensea
cg05171693	female	0.109325	0.00635783	3.16717e-44	1.18166e-38	7	1117775	C7orf50	Body-shelf
cg03791074	female	0.136847	0.00798262	4.78176e-44	1.78407e-38	7	1117852	C7orf50	Body-shelf
cg13595913	female	0.151248	0.00882995	5.35001e-44	1.99608e-38	9	5786038	ERMP1	3'UTR-opensea
cg00129232	female	0.168031	0.00982213	6.34333e-44	2.36668e-38	17	37814104	STARD3	Body-opensea
cg26764198	female	0.111912	0.00654364	6.59383e-44	2.46014e-38	16	87469002	ZCCHC14	Body-opensea
cg13531667	female	-0.315339	0.0184445	6.90493e-44	2.57622e-38	5	112825132	MCC	TSS1500-shore
cg05696153	female	0.15661	0.00917535	8.61303e-44	3.2135e-38	16	81732038	CMIP	Body-opensea
cg21870038	female	-0.234928	0.0138167	1.4433e-43	5.38491e-38	17	33390736	RFFL	1stExon-opensea
cg23281340	female	0.101472	0.0059943	2.61502e-43	9.75658e-38	19	6210918	MLLT1	3'UTR-shore
cg03177025	female	-0.232341	0.0137496	3.31364e-43	1.23631e-37	2	28112917	BRE	TSS1500-shore
cg00492309	female	0.0976538	0.00578944	4.21512e-43	1.57265e-37	16	2221491	TRAF7	Body-opensea
cg03169557	female	0.196701	0.0116728	4.79363e-43	1.78849e-37	16	89598950	SPG7	Body-opensea
cg16622514	female	0.0669004	0.00397657	5.96679e-43	2.2262e-37	5	74772303	COL4A3BP	Body-opensea
cg00799748	female	0.161497	0.00962412	8.39587e-43	3.13248e-37	16	1611052	IFT140	Body-opensea
cg09496762	female	-0.139057	0.00830552	1.13101e-42	4.21979e-37	20	42286524		IGR-island
cg12606391	female	0.0908566	0.00543242	1.30228e-42	4.85878e-37	13	26852712	CDK8	Body-opensea
cg16014770	female	-0.110898	0.00663469	1.41003e-42	5.2608e-37	12	31882421	AMN1	TSS1500-island
cg02580005	female	0.19869	0.0119153	1.93001e-42	7.20084e-37	4	151504187	LRBA	Body-island
cg01799521	female	0.146211	0.00877844	2.25161e-42	8.40072e-37	1	39305163	RRAGC	3'UTR-opensea
cg15711404	female	0.171386	0.0103003	2.56836e-42	9.5825e-37	17	80803949	TBCD	Body-opensea
cg03517024	female	0.192578	0.0115944	3.24136e-42	1.20935e-36	16	2221057	TRAF7	Body-opensea
cg20146489	female	0.139349	0.00840769	4.29738e-42	1.60334e-36	1	169847977	SCYL3	Body-opensea
cg04155747	female	0.0641578	0.0038748	4.88824e-42	1.82379e-36	4	74128032		IGR-shelf
cg24407065	female	0.0970236	0.00586112	5.0422e-42	1.88123e-36	1	169335802	BLZF1	TSS1500-opensea
cg09934056	female	-0.298495	0.0180327	5.07438e-42	1.89324e-36	19	8400203	KANK3	Body-island
cg10189882	female	0.163235	0.00988445	6.89112e-42	2.57106e-36	8	665934	ERICH1	Body-shore
cg17724627	female	0.179432	0.0108707	7.35568e-42	2.74439e-36	12	50041367	FMNL3	Body-opensea
cg06643271	female	-0.244878	0.014844	7.92003e-42	2.95495e-36	17	76128170	TMC8	Body-island
cg08722200	female	0.173794	0.0105507	9.61485e-42	3.58728e-36	20	55960520		IGR-shelf
cg07211684	female	0.136183	0.00829644	1.51695e-41	5.6597e-36	4	160211221	RAPGEF2	Body-opensea
cg00310375	female	-0.112143	0.00684096	1.80234e-41	6.72451e-36	2	85906657		IGR-opensea
cg15986164	female	0.13881	0.00848592	2.38003e-41	8.87983e-36	4	901785	GAK	Body-shore
cg16186001	female	0.11665	0.00713353	2.48415e-41	9.26833e-36	5	159448398	TTC1	Body-opensea
cg16222802	female	0.117162	0.00717849	3.17782e-41	1.18564e-35	3	50295474	GNAI2	3'UTR-shore
cg12711755	female	0.238379	0.0146083	3.25746e-41	1.21535e-35	15	41779622		IGR-shore
cg16665506	female	0.122695	0.00753692	4.42985e-41	1.65277e-35	3	129326828	PLXND1	TSS1500-shore
cg04317651	female	0.114153	0.00701266	4.46975e-41	1.66765e-35	19	3768001		IGR-shore
cg05631399	female	0.151865	0.00932973	4.49141e-41	1.67574e-35	11	66481581	SPTBN2	Body-opensea
cg06972019	female	-0.280831	0.0172808	5.53714e-41	2.0659e-35	1	8937448	ENO1	5'UTR-shore
cg02931398	female	0.124585	0.00770452	1.04944e-40	3.91545e-35	1	156637105		IGR-opensea
cg09575756	female	0.142111	0.0088055	1.34608e-40	5.02219e-35	5	138842776	ECSCR	TSS1500-opensea
cg14214165	female	0.249887	0.0155021	1.56829e-40	5.85126e-35	2	218777482	TNS1	5'UTR-opensea
cg07452625	female	0.14766	0.00916217	1.60989e-40	6.00645e-35	16	89598568	SPG7	Body-opensea
cg05958294	female	0.14993	0.00937267	4.16019e-40	1.55216e-34	13	113834216	PCID2	Body-opensea
cg06439269	female	0.138641	0.00867534	4.70038e-40	1.7537e-34	4	2256756	MXD4	Body-opensea
cg01275887	female	0.20245	0.0126844	5.5268e-40	2.06204e-34	7	4747216	FOXK1	Body-opensea
cg10170214	female	0.151242	0.00947781	5.66828e-40	2.11482e-34	10	102765227	LZTS2	Body-island
cg25602159	female	-0.134349	0.00843461	7.14096e-40	2.66428e-34	19	41222284	ADCK4	5'UTR-shore
cg13394216	female	0.176397	0.0111259	1.28e-39	4.77565e-34	6	1635808	GMDS	Body-opensea
cg06704466	female	0.128471	0.00810373	1.29291e-39	4.82383e-34	2	237010257	AGAP1	Body-island
cg09165170	female	0.160917	0.0101718	1.68538e-39	6.28811e-34	1	10601579	PEX14	Body-opensea
cg14287742	female	0.109912	0.00695963	2.08871e-39	7.79293e-34	1	169335773	BLZF1	TSS1500-opensea
cg17566936	female	-0.095706	0.00607109	2.62059e-39	9.77735e-34	4	48271107	TEC	5'UTR-shore
cg01943585	female	0.148492	0.00942224	2.71446e-39	1.01276e-33	1	112981693	CTTNBP2NL	Body-opensea
cg20934096	female	0.211924	0.0134557	2.93931e-39	1.09665e-33	7	1117418	C7orf50	Body-shelf
cg19002941	female	0.1956	0.0124199	2.95841e-39	1.10378e-33	8	641497	ERICH1	Body-shelf
cg00510447	female	-0.159814	0.010161	3.48633e-39	1.30074e-33	16	3071608	TNFRSF12A	Body-shore
cg09492252	female	0.11828	0.00752822	3.97609e-39	1.48347e-33	21	43369331	C2CD2	Body-shelf
cg18139800	female	0.168999	0.010764	4.3462e-39	1.62156e-33	6	32151517	AGER	Body-opensea
cg11207652	female	0.0795234	0.0050671	4.56939e-39	1.70483e-33	4	24860210	CCDC149	Body-opensea
cg06518233	female	0.125244	0.00798245	4.72342e-39	1.7623e-33	10	102765350	LZTS2	Body-island
cg17562299	female	0.115034	0.00733934	5.37474e-39	2.0053e-33	11	63674850	MARK2	Body-shore
cg18710162	female	-0.182917	0.0116938	6.89446e-39	2.57231e-33	17	33390808	RFFL	TSS200-opensea
cg23958533	female	0.0999173	0.00641108	1.08371e-38	4.04329e-33	1	204446308	PIK3C2B	5'UTR-opensea
cg24586978	female	0.277225	0.0178398	1.55219e-38	5.79117e-33	13	99612723	DOCK9	Body-opensea
cg21234123	female	0.155162	0.0099849	1.55335e-38	5.79553e-33	9	139435339	NOTCH1	Body-shelf
cg15007448	female	0.0912018	0.00587743	1.85437e-38	6.91863e-33	4	1970207	WHSC1	Body-opensea
cg23893897	female	0.0910245	0.00588211	2.59664e-38	9.68802e-33	14	50990170	MAP4K5	Body-opensea
cg10592926	female	0.136811	0.00886199	3.47743e-38	1.29742e-32	6	157876961	ZDHHC14	Body-opensea
cg18155101	female	0.0606239	0.00394321	5.76056e-38	2.14925e-32	1	41345795		IGR-shelf
cg01839430	female	-0.212712	0.0138823	8.6751e-38	3.23666e-32	2	216177098	ATIC	Body-island
cg13562122	female	0.154999	0.0101195	9.06975e-38	3.38391e-32	1	21587009	ECE1	Body-opensea
cg09179046	female	-0.130028	0.0085034	1.11183e-37	4.14822e-32	16	14164850	MKL2	TSS1500-island
cg10677959	female	0.136092	0.00891047	1.28241e-37	4.78466e-32	6	32151346	AGER	Body-opensea
cg00159682	female	0.0913253	0.0059886	1.54329e-37	5.75798e-32	8	6386150	ANGPT2	Body-opensea
cg13014333	female	-0.257349	0.0168882	1.68988e-37	6.30492e-32	6	31762776	VARS	Body-shore
cg24695281	female	0.110568	0.00725937	1.7912e-37	6.68295e-32	1	43760803		IGR-opensea
cg02174232	female	-0.212913	0.0139857	1.90098e-37	7.09251e-32	3	49712164	APEH	Body-island
cg08684361	female	-0.188028	0.0123744	2.38494e-37	8.89817e-32	6	30852823	DDR1	5'UTR-shore
cg17032848	female	0.146265	0.00963129	2.55054e-37	9.51602e-32	2	238647755	LRRFIP1	Body-shelf
cg26388152	female	-0.218423	0.0143863	2.62699e-37	9.80124e-32	17	27944453	CORO6	Body-island
cg24938752	female	0.139626	0.00923578	4.38814e-37	1.6372e-31	3	128294769	C3orf27	1stExon-opensea
cg14987309	female	0.147607	0.00976398	4.40276e-37	1.64266e-31	2	236843038	AGAP1	Body-opensea
cg12260990	female	0.127156	0.00841332	4.5385e-37	1.6933e-31	22	47371122	TBC1D22A	Body-shore
cg00238818	female	0.132746	0.00878952	4.94665e-37	1.84558e-31	5	176880261	PRR7	5'UTR-shore
cg21768042	female	0.144342	0.00956587	5.50586e-37	2.05422e-31	5	141059890	ARAP3	Body-opensea
cg10707788	female	0.191636	0.0127367	7.75946e-37	2.89504e-31	6	1635847	GMDS	Body-opensea
cg11912239	female	0.141122	0.00938283	8.10472e-37	3.02385e-31	17	76220608	BIRC5	3'UTR-opensea
cg02075410	female	0.193288	0.0128611	8.88397e-37	3.31459e-31	4	151504138	LRBA	Body-island
cg11855693	female	0.115685	0.00772238	1.30355e-36	4.86352e-31	12	96632551	ELK3	Body-opensea
cg02576092	female	-0.0719566	0.00480489	1.3534e-36	5.04949e-31	1	27668556	SYTL1	1stExon-opensea
cg01439753	female	0.126279	0.00843584	1.42357e-36	5.31132e-31	16	81726721	CMIP	Body-opensea
cg18326783	female	0.129322	0.0086433	1.5075e-36	5.62445e-31	10	102765364	LZTS2	Body-island
cg14468280	female	0.189811	0.0126995	1.70863e-36	6.37487e-31	20	47862976	ZNFX1	3'UTR-opensea
cg17514088	female	0.12737	0.0085507	2.54644e-36	9.5007e-31	17	76503074	DNAH17	Body-shelf
cg01772014	female	-0.223349	0.0149985	2.63675e-36	9.83768e-31	20	30606095	C20orf160	Body-shore
cg24663845	female	0.18623	0.0125097	2.73542e-36	1.02058e-30	3	125820497	SLC41A3	TSS200-opensea
cg14935716	female	0.139964	0.00940703	2.91624e-36	1.08804e-30	8	133805351	PHF20L1	Body-opensea
cg14789818	female	0.29488	0.0198212	2.95575e-36	1.10279e-30	1	227748712		IGR-island
cg25588852	female	-0.191786	0.012898	3.13825e-36	1.17087e-30	2	216877276	MREG	Body-shore
cg12308675	female	0.123246	0.00832654	5.3687e-36	2.00305e-30	2	239169537	PER2	Body-opensea
cg26084949	female	-0.249309	0.0168602	6.03321e-36	2.25098e-30	14	75039090	LTBP2	Body-opensea
cg13153865	female	-0.14095	0.00954224	6.82877e-36	2.5478e-30	8	90914101	OSGIN2	5'UTR-shore
cg14488715	female	0.152709	0.0103408	7.02408e-36	2.62067e-30	9	139407288	NOTCH1	Body-shore
cg05959932	female	0.144965	0.00984568	9.93923e-36	3.70831e-30	6	2382734		IGR-opensea
cg09479241	female	-0.170876	0.0116115	1.05604e-35	3.94006e-30	17	27052676	TLCD1	Body-shore
cg07507218	female	0.0944081	0.00641621	1.07354e-35	4.00536e-30	6	32085535	ATF6B	Body-opensea
cg13625187	female	0.133841	0.00910247	1.16369e-35	4.34169e-30	12	27736287	PPFIBP1	5'UTR-opensea
cg13184448	female	0.17054	0.0116152	1.37721e-35	5.13834e-30	2	238647857	LRRFIP1	Body-shelf
cg23488578	female	0.0871247	0.00594047	1.56552e-35	5.84093e-30	14	95585023	DICER1	Body-opensea
cg09146872	female	0.157759	0.0107642	1.69955e-35	6.34098e-30	17	820881	NXN	Body-opensea
cg02262727	female	0.0792118	0.00540601	1.74528e-35	6.51159e-30	11	43707755	HSD17B12	Body-opensea
cg19172487	female	0.151771	0.0103582	1.75076e-35	6.53206e-30	22	44394856	PARVB	TSS1500-shelf
cg04244171	female	0.101458	0.00692532	1.77643e-35	6.62783e-30	3	43331949	SNRK	5'UTR-shelf
cg06024289	female	-0.0870307	0.00595622	2.40989e-35	8.99125e-30	12	53342595	KRT18	TSS200-shore
cg24342696	female	0.126067	0.00862805	2.41849e-35	9.02335e-30	1	39617089	MACF1	Body-opensea
cg05406637	female	0.132661	0.00907978	2.43191e-35	9.07342e-30	14	51332290		IGR-opensea
cg10272731	female	0.160739	0.0110112	2.6914e-35	1.00416e-29	16	85614015		IGR-opensea
cg10180367	female	0.124165	0.00851052	2.8707e-35	1.07105e-29	19	34808158	KIAA0355	Body-opensea
cg03373115	female	-0.10999	0.00754132	2.97746e-35	1.11088e-29	1	64058883	PGM1	TSS200-shore
cg06003834	female	0.0952196	0.0065303	3.06834e-35	1.14479e-29	5	66354967	MAST4	Body-opensea
cg04429812	female	0.0722802	0.00496143	3.39433e-35	1.26642e-29	17	37814043	STARD3	Body-opensea
cg06486088	female	0.107805	0.00741741	4.45296e-35	1.66139e-29	2	237010222	AGAP1	Body-island
cg14823851	female	0.187393	0.012895	4.51856e-35	1.68587e-29	17	59532306	TBX4	TSS1500-island
cg10078415	female	-0.208745	0.014375	4.92216e-35	1.83645e-29	16	20775011	ACSM3	TSS1500-opensea
cg19718686	female	-0.167159	0.0115403	6.5738e-35	2.45267e-29	12	115141551		IGR-shelf
cg02342906	female	0.170613	0.0117838	6.89935e-35	2.57413e-29	1	10733858	CASZ1	Body-opensea
cg03663556	female	-0.339955	0.023498	7.5409e-35	2.8135e-29	7	50900556		IGR-opensea
cg04402948	female	0.12193	0.00843051	7.8081e-35	2.91319e-29	12	117613954	FBXO21	Body-opensea
cg10433819	female	0.100654	0.00696965	9.23242e-35	3.4446e-29	11	76289700		IGR-opensea
cg14415844	female	-0.108748	0.00753694	1.02429e-34	3.82162e-29	14	91884659	CCDC88C	TSS1500-island
cg00746143	female	0.177668	0.0123186	1.07322e-34	4.00416e-29	3	194959645	C3orf21	Body-opensea
cg17701921	female	0.144502	0.0100207	1.09394e-34	4.08148e-29	19	537170	CDC34	Body-shore
cg26421308	female	0.133996	0.00936539	2.66366e-34	9.93807e-29	11	86663040	FZD4	Body-shelf
cg05032848	female	-0.17928	0.0125366	2.81497e-34	1.05026e-28	17	33390854	RFFL	TSS200-opensea
cg15692229	female	0.0908933	0.00636691	3.42104e-34	1.27638e-28	7	55257946	EGFR	Body-opensea
cg14381919	female	-0.24063	0.016867	3.68944e-34	1.37652e-28	11	12701969	TEAD1	5'UTR-opensea
cg05373863	female	-0.125086	0.00876913	3.74781e-34	1.3983e-28	4	139163429	SLC7A11	1stExon-opensea
cg09506661	female	0.160378	0.0112543	4.18357e-34	1.56088e-28	19	1152022	SBNO2	Body-island
cg07339393	female	0.158228	0.0111348	5.74309e-34	2.14274e-28	10	3789537		IGR-opensea
cg00615919	female	0.0782302	0.00550889	6.19007e-34	2.3095e-28	2	240043915	HDAC4	Body-shelf
cg21539594	female	0.123934	0.00872831	6.272e-34	2.34007e-28	1	43765867	TIE1	TSS1500-opensea
cg06029935	female	-0.224078	0.0157833	6.36986e-34	2.37658e-28	8	145049044	PLEC1	Body-island
cg17723299	female	-0.124284	0.00875605	6.52222e-34	2.43343e-28	1	197744929	DENND1B	TSS1500-shore
cg09999582	female	-0.169877	0.0119731	6.83135e-34	2.54876e-28	2	103352711	MFSD9	Body-shore
cg06422947	female	0.135404	0.00954536	6.99045e-34	2.60812e-28	17	41167707	VAT1	3'UTR-opensea
cg12417815	female	0.142636	0.0100783	9.02998e-34	3.36907e-28	5	148830633		IGR-opensea
cg18910243	female	0.103836	0.00734143	9.68815e-34	3.61463e-28	10	45967498	2024-03-08	Body-opensea
cg18623658	female	0.198247	0.0140213	1.00743e-33	3.7587e-28	2	62900278	EHBP1	TSS1500-opensea
cg15470344	female	0.116171	0.00823162	1.23888e-33	4.62225e-28	1	203056504	MYOG	TSS1500-opensea
cg25539759	female	0.0787476	0.00558175	1.28526e-33	4.79527e-28	13	107211856	ARGLU1	Body-opensea
cg21931656	female	-0.126308	0.0089658	1.50854e-33	5.62834e-28	11	72462963	ARAP1	5'UTR-shore
cg07714812	female	0.175482	0.0124571	1.51778e-33	5.66281e-28	6	1635611	GMDS	Body-opensea
cg06903075	female	0.0807533	0.00573256	1.51988e-33	5.67063e-28	11	71709751	IL18BP	TSS1500-opensea
cg05010865	female	-0.111014	0.00788356	1.58136e-33	5.90002e-28	8	145049189	PLEC1	Body-island
cg25351606	female	0.233102	0.0165565	1.6139e-33	6.02141e-28	6	100917427		IGR-island
cg06651376	female	0.142863	0.0101523	1.70776e-33	6.37161e-28	17	1690794	SMYD4	Body-opensea
cg07216425	female	-0.122703	0.00873161	1.98693e-33	7.41321e-28	12	53297819	KRT8	Body-island
cg01280080	female	-0.260864	0.0185761	2.14602e-33	8.00677e-28	2	216177276	ATIC	Body-shore
cg12131862	female	0.185917	0.0132635	2.63123e-33	9.81706e-28	1	203613877	ATP2B4	5'UTR-opensea
cg20308684	female	0.098281	0.00702053	3.0334e-33	1.13176e-27	15	67000898	SMAD6	Body-opensea
cg05685297	female	0.121737	0.00869608	3.03375e-33	1.13188e-27	8	96070313	C8orf38	3'UTR-opensea
cg07893916	female	0.0981412	0.00701082	3.04652e-33	1.13665e-27	2	203155462	SNORD11B	TSS1500-opensea
cg09464735	female	0.183495	0.0131227	3.44155e-33	1.28404e-27	5	172175855		IGR-island
cg09663494	female	0.143721	0.0102987	4.28481e-33	1.59865e-27	16	67223733	EXOC3L	5'UTR-opensea
cg08381537	female	0.227958	0.0163488	4.7017e-33	1.7542e-27	19	310296	MIER2	Body-island
cg25386676	female	0.230151	0.0165231	5.26276e-33	1.96353e-27	5	172175721		IGR-island
cg07967632	female	0.22818	0.0164079	6.27473e-33	2.34109e-27	15	101601131	LRRK1	Body-opensea
cg26064895	female	-0.229674	0.0165839	9.86529e-33	3.68072e-27	4	48271121	TEC	5'UTR-shore
cg09618197	female	0.113814	0.00824158	1.34555e-32	5.02023e-27	6	5152468	LYRM4	Body-opensea
cg25774643	female	0.34165	0.024746	1.38325e-32	5.1609e-27	11	627175	SCT	TSS200-island
cg04305653	female	0.110885	0.00803401	1.43037e-32	5.33669e-27	22	47272422	TBC1D22A	Body-opensea
cg25889465	female	0.125947	0.0091273	1.4649e-32	5.46549e-27	17	76203084	AFMID	3'UTR-opensea
cg22478261	female	-0.141779	0.0102754	1.47763e-32	5.51301e-27	20	49348806	PARD6B	Body-shore
cg12589486	female	0.0598518	0.00433936	1.53812e-32	5.73868e-27	5	149903908	NDST1	Body-shelf
cg04944090	female	0.171043	0.0124016	1.54765e-32	5.77427e-27	16	85635486		IGR-opensea
cg27587645	female	-0.123914	0.00898741	1.60318e-32	5.98144e-27	19	2015311	BTBD2	1stExon-opensea
cg04834502	female	-0.161474	0.0117228	1.77811e-32	6.63411e-27	16	48644360	N4BP1	TSS1500-shore
cg22931402	female	-0.198419	0.0144076	1.81411e-32	6.76841e-27	4	113207418	TIFA	TSS1500-shore
cg02994246	female	0.17355	0.0126021	1.81678e-32	6.77836e-27	1	21587174	ECE1	Body-opensea
cg13725752	female	0.153119	0.0111199	1.84206e-32	6.87269e-27	9	34453817	C9orf25	Body-shelf
cg18253799	female	0.0969723	0.00704303	1.86057e-32	6.94173e-27	17	78069191	CCDC40	Body-opensea
cg25750259	female	-0.161943	0.0117759	2.11834e-32	7.9035e-27	20	43104962	TTPAL	5'UTR-shore
cg07961632	female	-0.220262	0.0160171	2.12418e-32	7.92526e-27	1	27668421	SYTL1	TSS200-opensea
cg13477354	female	0.162374	0.0118142	2.25747e-32	8.42257e-27	1	101705539	S1PR1	Body-shelf
cg09820244	female	0.190126	0.0138377	2.33313e-32	8.70485e-27	1	54790722	SSBP3	Body-opensea
cg09621958	female	-0.179074	0.0130376	2.41832e-32	9.02272e-27	3	112395854		IGR-opensea
cg01412022	female	0.0864359	0.00629858	2.65988e-32	9.92396e-27	6	33150892	COL11A2	Body-opensea
cg20968743	female	-0.419635	0.0305921	2.78814e-32	1.04025e-26	11	44883965	TSPAN18	5'UTR-opensea
cg23049737	female	0.17578	0.0128221	2.96729e-32	1.10709e-26	1	8412697	RERE	3'UTR-opensea
cg00394823	female	-0.197341	0.0143962	2.99897e-32	1.11891e-26	16	20775166	ACSM3	TSS200-opensea
cg26626042	female	0.0702329	0.00512688	3.21461e-32	1.19936e-26	6	32151594	AGER	Body-opensea
cg12297292	female	0.116691	0.00851847	3.22534e-32	1.20337e-26	13	114126424	DCUN1D2	Body-opensea
cg20827629	female	0.069836	0.00510746	3.93121e-32	1.46673e-26	1	231500113	EGLN1	3'UTR-opensea
cg00804803	female	0.167044	0.0122172	3.94697e-32	1.47261e-26	1	10601595	PEX14	Body-opensea
cg14412967	female	0.143487	0.0105069	4.4904e-32	1.67536e-26	7	51096971	COBL	Body-opensea
cg03035704	female	0.194355	0.0142351	4.60601e-32	1.71849e-26	12	52301970	ACVRL1	5'UTR-shore
cg20575277	female	-0.220913	0.0161844	4.7306e-32	1.76498e-26	15	90728569	SEMA4B	5'UTR-island
cg00294025	female	0.0654476	0.0047963	4.89387e-32	1.82589e-26	12	7276360	RBP5	3'UTR-opensea
cg06191357	female	-0.153971	0.0112862	5.0124e-32	1.87012e-26	1	172714273		IGR-opensea
cg00280758	female	-0.107337	0.00787082	5.21412e-32	1.94538e-26	4	140221967	NAA15	TSS1500-shore
cg26575445	female	-0.0969894	0.00711658	5.58377e-32	2.08329e-26	3	169756530	GPR160	5'UTR-island
cg12986611	female	0.0906923	0.00667051	7.21474e-32	2.69181e-26	5	172274118	ERGIC1	Body-opensea
cg13654884	female	0.141626	0.0104211	7.54517e-32	2.81509e-26	10	94594240	EXOC6	TSS1500-opensea
cg02596427	female	0.119313	0.00879282	8.89374e-32	3.31824e-26	2	47295058	TTC7A	Body-opensea
cg13151135	female	-0.110216	0.00812592	9.31175e-32	3.4742e-26	1	26560306	CCDC21	TSS1500-shore
cg17102069	female	-0.0750851	0.00553773	9.65856e-32	3.60359e-26	6	37139542	PIM1	Body-shore
cg25588480	female	0.134729	0.00994663	1.07528e-31	4.01185e-26	17	4763240	MINK1	Body-opensea
cg14196790	female	-0.202918	0.0150005	1.23581e-31	4.61077e-26	5	131705035	SLC22A5	TSS1500-shore
cg16026549	female	0.202533	0.0149836	1.34161e-31	5.00552e-26	6	32800519	TAP2	Body-opensea
cg16785213	female	-0.123266	0.00912412	1.41725e-31	5.28774e-26	16	75599104	GABARAPL2	TSS1500-shore
cg11732134	female	0.149438	0.0110688	1.52157e-31	5.67694e-26	1	10732912	CASZ1	Body-opensea
cg09317554	female	0.168931	0.0125175	1.5858e-31	5.91658e-26	4	151505084	LRBA	Body-island
cg10060338	female	-0.179205	0.0132834	1.64502e-31	6.13753e-26	16	20774960	ACSM3	TSS1500-opensea
cg13685015	female	0.133317	0.00989915	1.97589e-31	7.37199e-26	3	39221003		IGR-shore
cg02090418	female	0.137763	0.0102304	1.99963e-31	7.46056e-26	4	113333269	ALPK1	Body-island
cg16620283	female	0.161236	0.0119779	2.07891e-31	7.75636e-26	2	203155849	SNORD11B	TSS200-opensea
cg03859915	female	-0.104169	0.00774051	2.13456e-31	7.96399e-26	2	28112817	BRE	TSS1500-shore
cg03078239	female	0.0850339	0.00632134	2.23368e-31	8.33382e-26	8	9040449		IGR-opensea
cg15124109	female	-0.121539	0.00903833	2.31938e-31	8.65357e-26	1	156711332	MRPL24	TSS1500-shore
cg07004744	female	0.187993	0.013986	2.42235e-31	9.03775e-26	8	641479	ERICH1	Body-shelf
cg01797704	female	0.110899	0.0082575	2.65048e-31	9.88888e-26	16	81577049	CMIP	Body-opensea
cg05545808	female	0.146751	0.0109327	2.79868e-31	1.04418e-25	16	81712102	CMIP	Body-island
cg20906291	female	0.186246	0.0138771	2.84343e-31	1.06088e-25	6	10382103		IGR-island
cg12188526	female	0.0999519	0.00744773	2.85763e-31	1.06617e-25	14	71896386		IGR-opensea
cg06430102	female	0.172981	0.0128948	2.98638e-31	1.11421e-25	19	1151960	SBNO2	Body-shore
cg23929284	female	-0.152569	0.0113921	3.55516e-31	1.32642e-25	20	30605916	C20orf160	Body-island
cg02421543	female	-0.0870537	0.00652095	4.96659e-31	1.85302e-25	1	93810826	DR1	TSS1500-shore
cg06910100	female	0.168081	0.0126006	5.39889e-31	2.01432e-25	19	17375091	USHBP1	Body-opensea
cg10394610	female	0.0993389	0.00746089	6.54307e-31	2.44121e-25	2	234215965	SAG	TSS1500-opensea
cg21363377	female	0.236768	0.0178128	7.80988e-31	2.91385e-25	7	127651533	SND1	Body-opensea
cg15031753	female	0.140444	0.0105692	8.05223e-31	3.00427e-25	4	184938291	STOX2	Body-opensea
cg13922935	female	0.0868619	0.0065406	8.54901e-31	3.18962e-25	15	42804870	SNAP23	Body-opensea
cg07359518	female	0.103905	0.00782849	9.08176e-31	3.38839e-25	12	132562495	EP400	3'UTR-opensea
cg24987440	female	0.1429	0.0107776	1.0109e-30	3.77163e-25	7	116182100	CAV1	Body-opensea
cg02330500	female	-0.196976	0.0148584	1.02753e-30	3.83371e-25	14	95731916	CLMN	Body-opensea
cg03849279	female	0.154757	0.0116822	1.10861e-30	4.13622e-25	16	67751821	GFOD2	5'UTR-shore
cg23235154	female	-0.084277	0.00636353	1.13873e-30	4.24859e-25	6	159290589		IGR-shore
cg12866769	female	0.128107	0.00967328	1.14163e-30	4.25938e-25	15	67041828	SMAD6	Body-opensea
cg13924554	female	0.0654224	0.00494826	1.3574e-30	5.06443e-25	13	50710952		IGR-shelf
cg02597246	female	0.185737	0.0140487	1.3613e-30	5.07899e-25	16	81711959	CMIP	Body-island
cg09848693	female	0.0834352	0.00631152	1.37631e-30	5.13498e-25	3	65394690	MAGI1	Body-opensea
cg09179249	female	0.204097	0.015453	1.5106e-30	5.63601e-25	1	10732900	CASZ1	Body-opensea
cg27038724	female	0.080994	0.00613609	1.60782e-30	5.99876e-25	15	99670386	SYNM	Body-opensea
cg21808448	female	0.0998807	0.00756718	1.61291e-30	6.01772e-25	1	39859609	MACF1	Body-opensea
cg05873085	female	0.0693437	0.00525617	1.69567e-30	6.32649e-25	2	237010312	AGAP1	Body-island
cg08149422	female	-0.0951502	0.00722263	1.96534e-30	7.33266e-25	22	21983606	YDJC	Body-island
cg26026748	female	-0.317092	0.0240758	2.01724e-30	7.52628e-25	1	164629875	PBX1	Body-opensea
cg06544061	female	0.193609	0.0147015	2.03737e-30	7.6014e-25	7	2476423		IGR-shelf
cg11731300	female	-0.159083	0.0120835	2.10138e-30	7.84022e-25	1	161008542	TSTD1	Body-island
cg06854487	female	-0.0700375	0.00532154	2.17162e-30	8.10227e-25	11	71791011	NUMA1	5'UTR-shore
cg02725334	female	0.142175	0.0108074	2.27089e-30	8.47265e-25	22	32146705	C22orf30	TSS1500-shore
cg01383890	female	-0.155158	0.0117966	2.31871e-30	8.65107e-25	15	62358982	C2CD4A	TSS200-shore
cg20430656	female	0.178099	0.0135414	2.32927e-30	8.69045e-25	13	113642457	MCF2L	Body-opensea
cg24528523	female	-0.0579793	0.00441207	2.5399e-30	9.47631e-25	11	2923808	SLC22A18AS	5'UTR-island
cg02189785	female	-0.127642	0.00974208	3.44054e-30	1.28366e-24	9	139891008	CLIC3	1stExon-shore
cg02636004	female	0.143322	0.0109395	3.46337e-30	1.29218e-24	3	119747339	GSK3B	Body-opensea
cg19815634	female	0.119114	0.0091076	4.1389e-30	1.54422e-24	12	6280998		IGR-opensea
cg06920324	female	0.072478	0.0055554	5.31524e-30	1.98311e-24	7	149264011	ZNF767	Body-opensea
cg10026317	female	0.204473	0.0156839	5.71293e-30	2.13148e-24	1	47694919	TAL1	5'UTR-shore
cg26080154	female	0.168593	0.0129406	6.12139e-30	2.28388e-24	11	1314228	TOLLIP	Body-shore
cg19622755	female	-0.115637	0.00887586	6.12312e-30	2.28452e-24	2	47169299	MCFD2	TSS1500-shore
cg26449951	female	0.136916	0.0105423	8.42855e-30	3.14468e-24	2	219754840	WNT10A	Body-shelf
cg01465169	female	-0.159457	0.0122905	9.34074e-30	3.48501e-24	17	27944849	CORO6	Body-island
cg17221941	female	0.174655	0.0134663	9.6619e-30	3.60484e-24	1	10730684	CASZ1	Body-opensea
cg13396821	female	0.144763	0.0111686	1.02942e-29	3.84074e-24	1	154812952	KCNN3	Body-opensea
cg25729585	female	0.158873	0.0122849	1.29198e-29	4.82033e-24	1	203056475	MYOG	TSS1500-opensea
cg22954906	female	0.142223	0.0110068	1.40748e-29	5.25128e-24	13	103531058	LOC121952	TSS1500-opensea
cg24652982	female	0.0398439	0.00308386	1.42151e-29	5.30363e-24	6	149721359	MAP3K7IP2	Body-opensea
cg12446953	female	-0.204751	0.0158715	1.65536e-29	6.17612e-24	1	20960867	PINK1	Body-shore
cg27295042	female	0.13505	0.0104719	1.70968e-29	6.37879e-24	1	10738569	CASZ1	Body-opensea
cg17676428	female	0.18414	0.0142831	1.76764e-29	6.59505e-24	11	1314042	TOLLIP	Body-shore
cg00546117	female	0.154795	0.0120072	1.77172e-29	6.61024e-24	1	8445545	RERE	5'UTR-opensea
cg03143486	female	0.15713	0.0122314	2.52192e-29	9.40923e-24	7	811491	HEATR2	Body-shelf
cg00356723	female	-0.102398	0.00797158	2.54234e-29	9.48542e-24	11	63705697	NAA40	TSS1500-shore
cg13495850	female	-0.104447	0.00813697	2.73359e-29	1.0199e-23	18	20715040	CABLES1	TSS1500-island
cg04214370	female	0.0809599	0.00630884	2.80399e-29	1.04616e-23	1	246203659	SMYD3	Body-opensea
cg06671340	female	-0.127989	0.00997403	2.81677e-29	1.05093e-23	1	197744787	DENND1B	TSS200-island
cg18116174	female	0.145706	0.011357	2.87373e-29	1.07218e-23	5	142311682	ARHGAP26	Body-opensea
cg25974626	female	0.07779	0.00606496	2.95253e-29	1.10158e-23	7	32977142	RP9P	Body-opensea
cg14369455	female	0.142554	0.0111264	3.28959e-29	1.22734e-23	4	113300768	ALPK1	Body-island
cg19336198	female	0.150341	0.0117406	3.47463e-29	1.29638e-23	7	4746462	FOXK1	Body-opensea
cg18886436	female	-0.199595	0.0156088	3.9903e-29	1.48877e-23	12	54785171	ZNF385A	TSS200-island
cg19272238	female	0.150054	0.0117352	4.01301e-29	1.49725e-23	17	76220898	BIRC5	3'UTR-opensea
cg01809854	female	0.147336	0.0115514	5.13591e-29	1.9162e-23	13	24118951		IGR-shelf
cg00720839	female	0.178286	0.0139848	5.3934e-29	2.01227e-23	6	32800486	TAP2	Body-opensea
cg12279138	female	-0.272969	0.021417	5.52584e-29	2.06168e-23	1	224370322	DEGS1	TSS1500-shore
cg20042116	female	-0.119254	0.00935753	5.58067e-29	2.08214e-23	22	24655654	POM121L9P	Body-opensea
cg21876145	female	0.0853687	0.00669968	5.66645e-29	2.11414e-23	2	20243393	LAPTM4A	Body-opensea
cg01081168	female	0.27329	0.0214695	6.26621e-29	2.33791e-23	1	212278486		IGR-opensea
cg17523415	female	0.156861	0.0123323	6.75475e-29	2.52018e-23	10	126765380	CTBP2	5'UTR-opensea
cg08092105	female	-0.233726	0.0184063	7.97337e-29	2.97485e-23	16	58535384	NDRG4	Body-island
cg07061500	female	-0.0995819	0.00784494	8.25108e-29	3.07846e-23	6	159290520		IGR-shore
cg05050341	female	0.140147	0.0110427	8.40608e-29	3.13629e-23	9	130617534	ENG	TSS1500-shore
cg04549287	female	0.151905	0.0119707	8.50846e-29	3.17449e-23	13	52952319	THSD1	Body-opensea
cg14401320	female	0.0981688	0.00774238	9.2242e-29	3.44153e-23	14	105796811	PACS2	Body-shore
cg11786839	female	0.144805	0.011425	9.58654e-29	3.57672e-23	6	1635578	GMDS	Body-opensea
cg20699586	female	0.268167	0.0211621	9.76338e-29	3.6427e-23	1	227748719		IGR-island
cg13435326	female	0.255905	0.0202034	1.02018e-28	3.80629e-23	3	178907655	PIK3CA	5'UTR-opensea
cg08293531	female	0.21189	0.0167503	1.15884e-28	4.32361e-23	15	101601180	LRRK1	Body-opensea
cg17860201	female	0.107345	0.00848935	1.20743e-28	4.50489e-23	15	67000955	SMAD6	Body-opensea
cg11360546	female	0.222347	0.0175975	1.30008e-28	4.85057e-23	7	1094263	C7orf50	Body-shelf
cg04016383	female	0.153703	0.012166	1.31311e-28	4.89919e-23	2	198513476	RFTN2	Body-opensea
cg27243685	female	0.15467	0.0122459	1.34923e-28	5.03396e-23	21	43642366	ABCG1	Body-shelf
cg04228042	female	0.179166	0.0141857	1.35219e-28	5.045e-23	12	14996527	ART4	TSS200-opensea
cg23665216	female	0.108484	0.00860047	1.53381e-28	5.72262e-23	14	105916422	MTA1	Body-shore
cg23023126	female	0.182815	0.0144996	1.60116e-28	5.97391e-23	19	308808	MIER2	Body-island
cg07318287	female	-0.179051	0.014204	1.63375e-28	6.0955e-23	1	154377429	IL6R	TSS1500-shore
cg07966265	female	0.114563	0.00908902	1.64832e-28	6.14985e-23	1	10733477	CASZ1	Body-opensea
cg01261503	female	-0.221137	0.0175502	1.70363e-28	6.35621e-23	17	62493599	POLG2	TSS1500-shore
cg19278744	female	-0.158897	0.0126165	1.7825e-28	6.65046e-23	4	78079628	CCNG2	5'UTR-shore
cg10798682	female	0.149757	0.0119151	2.17526e-28	8.11586e-23	3	125820372	SLC41A3	5'UTR-opensea
cg02297801	female	-0.22163	0.017659	2.5026e-28	9.33716e-23	1	1710663	NADK	TSS1500-shore
cg25418484	female	0.0927966	0.00740288	2.81838e-28	1.05153e-22	11	71709762	IL18BP	TSS200-opensea
cg23440816	female	0.274155	0.0218791	2.92359e-28	1.09078e-22	1	223948910	CAPN2	Body-opensea
cg02521750	female	0.190433	0.0152005	2.97807e-28	1.11111e-22	16	81712054	CMIP	Body-island
cg20009461	female	0.201285	0.0160672	2.98667e-28	1.11432e-22	17	80560634	FOXK2	3'UTR-shore
cg00702638	female	-0.093959	0.00750138	3.03635e-28	1.13285e-22	3	44803293	KIF15	1stExon-island
cg05252161	female	-0.0410448	0.0032781	3.14718e-28	1.17421e-22	14	105956199	C14orf80	TSS1500-island
cg04662056	female	0.156578	0.0125116	3.30558e-28	1.23331e-22	17	73506017	CASKIN2	Body-opensea
cg19723715	female	0.124576	0.0099575	3.40426e-28	1.27012e-22	7	1125817	GPER	TSS1500-shore
cg21137236	female	0.0984944	0.0078748	3.49057e-28	1.30233e-22	4	113333072	ALPK1	Body-island
cg13741211	female	0.113972	0.00912265	3.89853e-28	1.45453e-22	7	98607297	TRRAP	Body-shore
cg01012445	female	0.171043	0.0136917	3.9218e-28	1.46322e-22	4	151504920	LRBA	Body-island
cg15430661	female	0.120244	0.00963163	4.17843e-28	1.55896e-22	12	52403817	GRASP	Body-shelf
cg13587449	female	0.159265	0.0127694	4.58036e-28	1.70892e-22	10	72240883	KIAA1274	5'UTR-shelf
cg11117099	female	-0.194756	0.0156156	4.59696e-28	1.71512e-22	17	43325657	LOC100133991	Body-island
cg15958839	female	0.121098	0.0097238	5.28763e-28	1.97281e-22	2	54843164	SPTBN1	Body-opensea
cg04002220	female	0.122161	0.00981157	5.41769e-28	2.02133e-22	16	89598305	SPG7	Body-opensea
cg24161057	female	-0.205084	0.0164812	5.72535e-28	2.13612e-22	1	161008811	TSTD1	TSS200-island
cg23804620	female	-0.141791	0.0114054	6.25994e-28	2.33557e-22	4	6690894		IGR-opensea
cg13637552	female	0.100679	0.00810071	6.43474e-28	2.40079e-22	11	1534712	HCCA2	Body-shelf
cg18483459	female	0.255176	0.0205346	6.52015e-28	2.43266e-22	2	203294144	BMPR2	Body-opensea
cg14336501	female	0.0827902	0.00666279	6.56651e-28	2.44995e-22	17	35424059		IGR-opensea
cg15333769	female	0.0582723	0.00469077	6.71908e-28	2.50688e-22	22	26983348	TPST2	5'UTR-shelf
cg00017271	female	0.130349	0.0104972	6.99842e-28	2.6111e-22	17	76220743	BIRC5	3'UTR-opensea
cg24683222	female	0.223897	0.0180335	7.10109e-28	2.6494e-22	4	41880440		IGR-island
cg10819733	female	-0.198938	0.0160339	7.56924e-28	2.82407e-22	22	24237672		IGR-shore
cg10843210	female	0.105164	0.0084832	8.21204e-28	3.06389e-22	3	195613589	TNK2	Body-island
cg08786822	female	0.0665017	0.00536513	8.31508e-28	3.10234e-22	4	3109268	HTT	Body-opensea
cg14525527	female	0.0790998	0.00638898	9.30012e-28	3.46986e-22	7	51096783	COBL	Body-opensea
cg11224624	female	-0.110429	0.00892093	9.44619e-28	3.52435e-22	8	145049280	PLEC1	Body-island
cg06637017	female	0.10394	0.00840039	9.849e-28	3.67464e-22	5	1092391	SLC12A7	Body-shore
cg02026535	female	0.132795	0.0107513	1.1643e-27	4.34396e-22	19	7580217	ZNF358	TSS1500-shore
cg08549335	female	-0.302435	0.0245034	1.24744e-27	4.65417e-22	7	30387954	ZNRF2	Body-opensea
cg13962372	female	0.215342	0.0174534	1.29135e-27	4.818e-22	1	22415149	CDC42	Body-opensea
cg10383447	female	-0.188731	0.0153016	1.33238e-27	4.97107e-22	16	58535093	NDRG4	Body-island
cg01552919	female	0.169287	0.0137426	1.50267e-27	5.60642e-22	4	901847	GAK	Body-shore
cg05780177	female	-0.122549	0.00995141	1.54583e-27	5.76747e-22	1	197744757	DENND1B	TSS200-island
cg22853713	female	0.190305	0.0154602	1.61184e-27	6.01373e-22	1	10732872	CASZ1	Body-opensea
cg16620032	female	-0.180618	0.0146811	1.69623e-27	6.32862e-22	19	46097075	GPR4	5'UTR-shore
cg26690592	female	-0.164987	0.0134177	1.78357e-27	6.65446e-22	11	19261879	E2F8	5'UTR-shore
cg00739667	female	0.171702	0.0139767	1.94489e-27	7.25634e-22	16	81731648	CMIP	Body-opensea
cg25390506	female	-0.0473454	0.00385829	2.16402e-27	8.0739e-22	7	135347085	PL-5283	TSS200-island
cg26808293	female	-0.0886481	0.00722462	2.17736e-27	8.12369e-22	16	3072207	TNFRSF12A	3'UTR-shore
cg01304145	female	0.111626	0.00910021	2.24521e-27	8.37683e-22	16	22296770	EEF2K	3'UTR-opensea
cg13756932	female	0.118346	0.0096529	2.35424e-27	8.78364e-22	2	136737707	DARS	Body-opensea
cg16326402	female	0.171574	0.0140204	2.80364e-27	1.04603e-21	2	158698856	ACVR1	5'UTR-opensea
cg16425726	female	0.159358	0.0130266	2.89546e-27	1.08029e-21	4	83680145	SCD5	Body-opensea
cg01393234	female	-0.205791	0.0168356	3.11992e-27	1.16403e-21	1	226085079		IGR-opensea
cg14956201	female	0.140048	0.0114641	3.30052e-27	1.23142e-21	5	14358153	TRIO	Body-opensea
cg05750962	female	-0.11951	0.00979156	3.58558e-27	1.33777e-21	18	45535166		IGR-shore
cg02053092	female	0.110283	0.00903752	3.66014e-27	1.36559e-21	6	119220428	ASF1A	Body-shelf
cg17556527	female	0.193447	0.0158552	3.71314e-27	1.38536e-21	11	67859023	CHKA	Body-opensea
cg18935743	female	0.181834	0.0149047	3.74459e-27	1.3971e-21	17	77864155		IGR-opensea
cg15239304	female	0.0925158	0.00759238	4.18488e-27	1.56137e-21	2	224810907	WDFY1	TSS1500-shore
cg09494609	female	-0.218325	0.0179267	4.40085e-27	1.64195e-21	12	53448180	TENC1	Body-island
cg07284476	female	0.0729753	0.00599939	4.93948e-27	1.84291e-21	17	65546480	PITPNC1	Body-opensea
cg02371119	female	-0.128252	0.01055	5.21976e-27	1.94748e-21	3	171527346	PLD1	5'UTR-shore
cg25422797	female	0.129857	0.0106872	5.46376e-27	2.03852e-21	17	73506046	CASKIN2	Body-opensea
cg05442717	female	0.155112	0.0127698	5.62929e-27	2.10028e-21	17	38511950	RARA	Body-opensea
cg10101680	female	0.0746487	0.00614648	5.70756e-27	2.12948e-21	14	93770551	BTBD7	5'UTR-opensea
cg08301307	female	0.140146	0.0115439	5.91404e-27	2.20651e-21	14	103599204	TNFAIP2	Body-opensea
cg17897352	female	0.196669	0.0162026	6.01348e-27	2.24362e-21	10	121011644	GRK5	Body-opensea
cg12419685	female	0.135638	0.0111759	6.08337e-27	2.26969e-21	20	33451367	GGT7	Body-island
cg21793127	female	0.143661	0.0118376	6.11297e-27	2.28074e-21	17	73506038	CASKIN2	Body-opensea
cg01645729	female	-0.0691419	0.00570543	6.98728e-27	2.60694e-21	2	131582240		IGR-opensea
cg08271909	female	0.123845	0.0102313	7.78207e-27	2.90347e-21	4	155661691		IGR-island
cg12611860	female	0.0732776	0.00605436	7.85938e-27	2.93232e-21	11	17191617	PIK3C2A	TSS1500-opensea
cg08979319	female	0.18276	0.0151085	8.27716e-27	3.08819e-21	6	100896055	SIM1	Body-island
cg02861178	female	-0.210381	0.017415	9.36518e-27	3.49413e-21	20	10492319	C20orf94	Body-opensea
cg17901038	female	0.0976261	0.00808992	1.03315e-26	3.85468e-21	17	74385781	UBE2O	3'UTR-shelf
cg23587176	female	0.150039	0.0124338	1.03816e-26	3.87337e-21	7	4746837	FOXK1	Body-opensea
cg01991625	female	0.0816604	0.00676813	1.05075e-26	3.92034e-21	16	54404353		IGR-opensea
cg05330497	female	0.0574167	0.00476326	1.14633e-26	4.27692e-21	16	58147704	C16orf80	3'UTR-opensea
cg14822966	female	-0.0977833	0.00811351	1.16546e-26	4.34829e-21	4	1714979	SLBP	TSS1500-island
cg08139247	female	0.195747	0.0162518	1.23206e-26	4.59679e-21	14	38725312	CLEC14A	1stExon-island
cg14101959	female	0.154521	0.0128327	1.2659e-26	4.72304e-21	9	128229793	MAPKAP1	Body-opensea
cg07394299	female	-0.0793731	0.00659247	1.27726e-26	4.76544e-21	5	36745618		IGR-shore
cg05036846	female	-0.222152	0.0184565	1.31125e-26	4.89223e-21	1	24648984	GRHL3	TSS1500-island
cg16365445	female	0.16047	0.0133356	1.34471e-26	5.01708e-21	10	33230686	ITGB1	5'UTR-opensea
cg19178151	female	0.162571	0.0135181	1.41949e-26	5.29607e-21	4	184938359	STOX2	Body-opensea
cg01824933	female	0.218808	0.0182141	1.56911e-26	5.85432e-21	17	75539901		IGR-opensea
cg07303143	female	-0.236982	0.0197283	1.57868e-26	5.89003e-21	3	44803452	KIAA1143	TSS1500-island
cg01101020	female	0.0899679	0.00749586	1.70386e-26	6.35708e-21	12	132562425	EP400	3'UTR-opensea
cg14975798	female	0.117528	0.00979938	1.82502e-26	6.80911e-21	3	111835839	C3orf52	3'UTR-opensea
cg11493223	female	-0.204949	0.01709	1.84028e-26	6.86605e-21	17	76128522	TMC8	Body-shore
cg05664352	female	0.199566	0.0166416	1.84466e-26	6.88239e-21	10	3441404		IGR-opensea
cg25466805	female	-0.132399	0.0110416	1.86012e-26	6.94006e-21	11	72463704	ARAP1	TSS1500-island
cg08844325	female	0.179264	0.0149521	1.88379e-26	7.02839e-21	2	9459368	ASAP2	Body-island
cg01881046	female	-0.104702	0.00873804	1.98627e-26	7.41073e-21	4	186124759	KIAA1430	5'UTR-island
cg10773016	female	-0.145891	0.0121831	2.10295e-26	7.84605e-21	4	6690812		IGR-opensea
cg07138585	female	0.0993394	0.00830574	2.35024e-26	8.7687e-21	2	45176067		IGR-shore
cg01135648	female	0.14887	0.012456	2.51119e-26	9.36922e-21	4	41983611	DCAF4L1	TSS200-shore
cg25743481	female	-0.095074	0.00796245	2.73931e-26	1.02203e-20	3	44803289	KIF15	1stExon-island
cg27234490	female	0.0946791	0.00793589	2.95228e-26	1.10149e-20	3	58174435		IGR-opensea
cg06155414	female	0.150279	0.0125966	2.96124e-26	1.10483e-20	13	97893311	MBNL2	5'UTR-opensea
cg06478823	female	-0.183843	0.0154167	3.07956e-26	1.14898e-20	16	20774873	ACSM3	TSS1500-opensea
cg13933043	female	-0.275867	0.0231435	3.20325e-26	1.19513e-20	7	130696871	FLJ43663	Body-opensea
cg20629021	female	0.0653318	0.00548162	3.24007e-26	1.20886e-20	11	68580041	CPT1A	Body-opensea
cg08443563	female	-0.337216	0.028312	3.43491e-26	1.28156e-20	2	112456811		IGR-opensea
cg19558628	female	-0.138198	0.0116045	3.4794e-26	1.29816e-20	14	24801616	ADCY4	Body-shore
cg14791193	female	0.138011	0.0116028	3.88504e-26	1.4495e-20	1	16702476	C1orf144	Body-opensea
cg18471993	female	0.194496	0.0163548	3.95342e-26	1.47501e-20	6	100917416		IGR-island
cg16310077	female	-0.139537	0.0117345	3.9851e-26	1.48683e-20	14	105554214		IGR-island
cg18135132	female	-0.0993531	0.00835815	4.1174e-26	1.53619e-20	11	10814092		IGR-opensea
cg22689249	female	0.107298	0.00903031	4.2762e-26	1.59544e-20	6	10555262	GCNT2	TSS1500-opensea
cg03283569	female	-0.0768942	0.006473	4.36874e-26	1.62997e-20	9	127963181	RABEPK	1stExon-shore
cg13301014	female	-0.132901	0.0111877	4.36931e-26	1.63018e-20	19	38754768	SPINT2	TSS1500-shore
cg07495357	female	-0.111533	0.00938987	4.41083e-26	1.64567e-20	6	43021181	CUL7	Body-island
cg15948504	female	0.084972	0.00716239	4.92083e-26	1.83595e-20	1	151285561	PI4KB	Body-opensea
cg04426588	female	0.0753132	0.00635219	5.20584e-26	1.94229e-20	17	54915771	DGKE	Body-shelf
cg07959094	female	0.0904484	0.00763155	5.38176e-26	2.00793e-20	19	15347074		IGR-shore
cg21888059	female	0.0888313	0.00749583	5.42898e-26	2.02554e-20	6	112042632	FYN	5'UTR-opensea
cg22871253	female	-0.240374	0.020289	5.56513e-26	2.07634e-20	6	159238744	EZR	Body-shore
cg07938459	female	-0.154351	0.0130332	5.76324e-26	2.15025e-20	12	7055586	PTPN6	TSS200-shore
cg26086029	female	0.093232	0.00788095	6.35865e-26	2.3724e-20	14	92591610	CPSF2	5'UTR-shelf
cg25287474	female	-0.123187	0.0104155	6.49182e-26	2.42209e-20	9	14693538	ZDHHC21	TSS200-island
cg19589494	female	0.111934	0.00947152	6.97093e-26	2.60084e-20	11	9648370		IGR-opensea
cg07719617	female	0.163496	0.013837	7.08781e-26	2.64445e-20	2	239169696	PER2	Body-opensea
cg00091064	female	0.129788	0.0109857	7.17174e-26	2.67576e-20	6	41376604		IGR-island
cg00500428	female	-0.118547	0.0100384	7.44435e-26	2.77747e-20	16	3074502	HCFC1R1	TSS1500-shore
cg05570654	female	0.118658	0.0100489	7.51988e-26	2.80565e-20	2	240259075	HDAC4	Body-opensea
cg24056954	female	0.108358	0.00918248	7.96215e-26	2.97066e-20	11	67926217	SUV420H1	Body-opensea
cg24888989	female	-0.0750553	0.00636833	8.91595e-26	3.32652e-20	3	44803291	KIF15	1stExon-island
cg02128308	female	0.0695175	0.00589873	8.95285e-26	3.34029e-20	13	114126436	DCUN1D2	Body-opensea
cg19897172	female	-0.079389	0.00674722	1.0347e-25	3.86043e-20	7	135347071	PL-5283	TSS200-island
cg15554023	female	0.159383	0.0135514	1.0732e-25	4.00411e-20	1	144008937		IGR-opensea
cg12806121	female	0.161987	0.0137758	1.09471e-25	4.08434e-20	1	10601389	PEX14	Body-opensea
cg10782218	female	0.0587829	0.00499978	1.10875e-25	4.13673e-20	17	61518489	CYB561	TSS1500-shelf
cg22500132	female	-0.195973	0.0166726	1.13366e-25	4.22965e-20	1	155162752	MUC1	TSS200-shore
cg08383929	female	0.1127	0.00959832	1.24707e-25	4.65278e-20	5	180646754		IGR-island
cg27642428	female	-0.0762675	0.00649614	1.25892e-25	4.69701e-20	11	63705693	NAA40	TSS1500-shore
cg18556455	female	0.130005	0.0110817	1.34676e-25	5.02473e-20	2	45178474		IGR-shore
cg06665333	female	0.114164	0.00973804	1.43142e-25	5.3406e-20	16	87873837	SLC7A5	Body-opensea
cg06429887	female	0.162202	0.0138424	1.49578e-25	5.58074e-20	14	24600500	FITM1	TSS200-shore
cg13906823	female	-0.21676	0.0185517	1.93276e-25	7.21107e-20	1	161008824	TSTD1	TSS200-island
cg09040896	female	0.137306	0.0117572	2.01727e-25	7.5264e-20	16	1560040	TELO2	3'UTR-island
cg08884974	female	0.15463	0.0132425	2.0422e-25	7.6194e-20	15	31505024		IGR-shelf
cg05350879	female	0.115337	0.00987767	2.04621e-25	7.63436e-20	4	88451223	SPARCL1	TSS1500-opensea
cg13161113	female	0.169943	0.0145566	2.07689e-25	7.74883e-20	6	158438198	SYNJ2	Body-opensea
cg20961591	female	-0.0782056	0.00671213	2.47792e-25	9.24506e-20	19	38755588	SPINT2	1stExon-island
cg05845376	female	0.211043	0.0181167	2.52152e-25	9.40774e-20	5	140683632	SLC25A2	TSS200-island
cg04623270	female	0.164298	0.0141161	2.72215e-25	1.01563e-19	16	58150017	C16orf80	Body-opensea
cg09062462	female	0.12872	0.0110654	2.85648e-25	1.06575e-19	1	85220242		IGR-island
cg09341491	female	0.168287	0.0144685	2.8868e-25	1.07706e-19	16	50707795	SNX20	Body-island
cg23498925	female	0.158408	0.0136228	2.9553e-25	1.10262e-19	13	52952113	THSD1	Body-opensea
cg03339247	female	0.188416	0.016239	3.58639e-25	1.33807e-19	16	73059888	ZFHX3	5'UTR-opensea
cg15452970	female	0.186796	0.0161131	3.8658e-25	1.44232e-19	1	91190620		IGR-island
cg25718696	female	0.0565287	0.00487868	4.04289e-25	1.5084e-19	4	151503588	LRBA	Body-shore
cg27665659	female	-0.0624042	0.00538924	4.2791e-25	1.59653e-19	7	100797595	AP1S1	TSS200-island
cg17451419	female	-0.125713	0.0108608	4.42441e-25	1.65074e-19	1	86047227	CYR61	Body-island
cg13382100	female	-0.135573	0.0117142	4.48125e-25	1.67194e-19	12	132414849	PUS1	Body-shore
cg07724304	female	0.139944	0.0120959	4.61142e-25	1.72051e-19	17	73509955	CASKIN2	5'UTR-shore
cg07545037	female	0.160427	0.0138721	4.78203e-25	1.78416e-19	12	54423920	HOXC4	5'UTR-shore
cg15151059	female	0.153676	0.013294	4.96739e-25	1.85332e-19	1	150936875	SETDB1	3'UTR-opensea
cg02652344	female	0.161678	0.0139875	5.00377e-25	1.8669e-19	9	123553595	FBXW2	5'UTR-shore
cg10654803	female	0.145136	0.0125636	5.26102e-25	1.96287e-19	5	41809936	OXCT1	Body-opensea
cg13734860	female	0.122341	0.0105975	5.57899e-25	2.08151e-19	8	109206912		IGR-opensea
cg04242728	female	0.145914	0.0126478	5.91546e-25	2.20705e-19	16	2536153	TBC1D24	5'UTR-opensea
cg21682780	female	0.0777131	0.00674169	6.35375e-25	2.37057e-19	1	200211351		IGR-opensea
cg16154524	female	0.0834505	0.00724074	6.45625e-25	2.40881e-19	17	26633895	FLJ40504	Body-island
cg17094249	female	-0.286143	0.024843	6.81102e-25	2.54118e-19	1	24867657		IGR-opensea
cg09142117	female	0.0978388	0.00849474	6.83653e-25	2.55069e-19	16	2079658	SLC9A3R2	Body-shelf
cg24411043	female	-0.210417	0.0182879	7.47485e-25	2.78885e-19	1	161008297	TSTD1	Body-shore
cg17276002	female	-0.167585	0.0145702	7.69504e-25	2.871e-19	10	75172806	ANXA7	5'UTR-shore
cg04076286	female	0.0923997	0.00803699	8.00008e-25	2.98481e-19	3	42630270		IGR-shore
cg16889659	female	0.110966	0.00965408	8.1573e-25	3.04347e-19	15	67043450	SMAD6	Body-opensea
cg05482022	female	0.147119	0.0128006	8.22725e-25	3.06957e-19	7	2476326		IGR-shelf
cg22186315	female	0.0834214	0.00726236	8.62826e-25	3.21919e-19	17	79259963	SLC38A10	Body-shore
cg14764357	female	0.190434	0.0165843	8.89635e-25	3.31921e-19	7	1093718	C7orf50	Body-shelf
cg00100538	female	0.0974068	0.00848599	9.18519e-25	3.42698e-19	4	184067792	WWC2	Body-opensea
cg17031967	female	0.153624	0.0133907	9.6153e-25	3.58745e-19	6	25297487	LRRC16A	Body-opensea
cg05457373	female	0.0924714	0.00806315	9.91834e-25	3.70051e-19	15	67000902	SMAD6	Body-opensea
cg24750513	female	0.115766	0.0101007	1.04704e-24	3.90647e-19	2	127819455	BIN1	Body-shore
cg17029193	female	0.237575	0.0207387	1.09206e-24	4.07447e-19	1	8510607	RERE	Body-opensea
cg06135480	female	-0.0793622	0.00692923	1.11223e-24	4.1497e-19	16	85644718	KIAA0182	TSS1500-shore
cg15964018	female	0.109427	0.0095562	1.13211e-24	4.2239e-19	1	19490180	UBR4	Body-opensea
cg00766964	female	0.204613	0.0178947	1.28338e-24	4.78828e-19	13	24693844		IGR-opensea
cg07351192	female	0.17538	0.0153505	1.3767e-24	5.13645e-19	3	5137773		IGR-island
cg04797570	female	-0.10251	0.00897253	1.37827e-24	5.14231e-19	11	47587672	PTPMT1	Body-shore
cg07933234	female	0.27431	0.0240179	1.41809e-24	5.29086e-19	10	3441625		IGR-opensea
cg07366188	female	0.144696	0.0126715	1.44008e-24	5.37291e-19	17	76220929	BIRC5	3'UTR-opensea
cg15781573	female	0.0779534	0.00683402	1.58139e-24	5.90013e-19	3	45550104	LARS2	Body-opensea
cg13470063	female	0.186967	0.0164047	1.69905e-24	6.33913e-19	1	43766206	TIE1	TSS1500-opensea
cg20942867	female	-0.141973	0.0124607	1.74502e-24	6.51063e-19	1	27426144	SLC9A1	3'UTR-opensea
cg01748627	female	-0.141436	0.0124164	1.7792e-24	6.63816e-19	11	67272202	PITPNM1	5'UTR-island
cg24463664	female	0.126525	0.0111145	1.87949e-24	7.01234e-19	8	38160704	WHSC1L1	Body-opensea
cg03290748	female	0.13371	0.0117505	1.94592e-24	7.2602e-19	15	68370885	PIAS1	Body-opensea
cg04154911	female	0.15112	0.0132812	1.95659e-24	7.29999e-19	2	36725928	CRIM1	Body-opensea
cg17862981	female	0.14398	0.0126546	1.96817e-24	7.34319e-19	2	149869265	KIF5C	3'UTR-shelf
cg24441911	female	0.0784737	0.00690178	2.08457e-24	7.77749e-19	12	7280988	RBP5	Body-opensea
cg03025825	female	0.163358	0.0143674	2.08484e-24	7.7785e-19	17	1975245	SMG6	Body-opensea
cg11936643	female	-0.233966	0.0205822	2.12726e-24	7.93678e-19	10	116286411	ABLIM1	Body-opensea
cg01770232	female	-0.224297	0.0197336	2.14514e-24	8.00347e-19	7	22766155	IL6	TSS1500-opensea
cg14136781	female	0.119749	0.0105376	2.18306e-24	8.14494e-19	9	124087974	GSN	Body-opensea
cg11028923	female	-0.162546	0.0143112	2.28376e-24	8.52066e-19	5	43557644	PAIP1	TSS1500-shore
cg27418434	female	0.17106	0.015064	2.3254e-24	8.67602e-19	7	751009	PRKAR1B	Body-island
cg26192720	female	0.136846	0.0120525	2.35002e-24	8.76788e-19	11	62557528	TMEM179B	3'UTR-shore
cg24035245	female	0.234124	0.0206351	2.50049e-24	9.32927e-19	1	119535928		IGR-island
cg15605011	female	-0.061037	0.00538756	2.83546e-24	1.05791e-18	1	110162477	AMPD2	1stExon-island
cg12411994	female	0.0401173	0.00354368	3.02194e-24	1.12748e-18	7	150017070	ACTR3C	5'UTR-shelf
cg09307985	female	0.145648	0.0128659	3.02873e-24	1.13001e-18	19	36643070	COX7A1	Body-island
cg22582113	female	-0.0403561	0.00356652	3.1504e-24	1.17541e-18	9	130742348	FAM102A	1stExon-shore
cg24898753	female	-0.200786	0.017748	3.20051e-24	1.1941e-18	11	61735917	FTH1	TSS1500-island
cg12407978	female	0.174663	0.0154412	3.24104e-24	1.20923e-18	11	10590159	LYVE1	1stExon-opensea
cg12938814	female	0.140277	0.012405	3.32612e-24	1.24097e-18	5	154253549	CNOT8	Body-opensea
cg04389398	female	0.147141	0.0130221	3.55371e-24	1.32588e-18	7	103767075	ORC5L	3'UTR-opensea
cg19643921	female	-0.182984	0.0162047	3.75183e-24	1.3998e-18	19	41197106	NUMBL	TSS1500-island
cg08658787	female	0.172855	0.0153078	3.75531e-24	1.4011e-18	12	113916646		IGR-island
cg11696200	female	0.212977	0.0188639	3.80637e-24	1.42015e-18	13	33768013	STARD13	5'UTR-opensea
cg09159452	female	0.269326	0.0238554	3.81198e-24	1.42224e-18	7	2609861	IQCE	Body-opensea
cg02037307	female	0.217375	0.0192554	3.83798e-24	1.43194e-18	5	134363562	PITX1	3'UTR-island
cg04100397	female	0.112008	0.00992229	3.85454e-24	1.43812e-18	2	110875551	MALL	TSS1500-shore
cg22584911	female	0.101628	0.00900505	3.93713e-24	1.46893e-18	15	52176689	TMOD3	Body-opensea
cg07145988	female	0.14931	0.0132371	4.12106e-24	1.53756e-18	1	8692312	RERE	Body-opensea
cg15610488	female	0.0947562	0.00840235	4.19162e-24	1.56389e-18	13	113492103	ATP11A	Body-shore
cg21051964	female	0.153305	0.0135972	4.2753e-24	1.59511e-18	12	58022620	B4GALNT1	Body-shore
cg10761843	female	0.108469	0.00962274	4.35701e-24	1.62559e-18	2	172411765	CYBRD1	3'UTR-opensea
cg16919569	female	0.22256	0.0197457	4.38607e-24	1.63643e-18	4	174452835	NBLA00301	Body-island
cg22508782	female	-0.119177	0.0105736	4.39185e-24	1.63859e-18	3	49028594	P4HTM	Body-shore
cg27496339	female	-0.221732	0.0196736	4.41317e-24	1.64654e-18	7	43803803	BLVRA	5'UTR-opensea
cg15618758	female	0.171775	0.0152417	4.42719e-24	1.65177e-18	6	157168834	ARID1B	Body-opensea
cg03724759	female	-0.0773829	0.00686892	4.57661e-24	1.70752e-18	1	26633534	UBXN11	5'UTR-shore
cg06653141	female	-0.0863806	0.00767156	4.78077e-24	1.7837e-18	5	36745541		IGR-island
cg22445447	female	0.115872	0.0102936	4.89741e-24	1.82721e-18	15	41712591	RTF1	Body-shelf
cg12744634	female	-0.128566	0.0114235	4.97509e-24	1.8562e-18	1	26560303	CCDC21	TSS1500-shore
cg01485547	female	0.168236	0.0149486	4.98487e-24	1.85985e-18	6	10555264	GCNT2	TSS1500-opensea
cg00068750	female	0.112273	0.00998332	5.3036e-24	1.97876e-18	16	2535955	TBC1D24	5'UTR-opensea
cg17555373	female	0.228723	0.0203416	5.38262e-24	2.00824e-18	13	53775108		IGR-island
cg15010544	female	0.100111	0.00890511	5.46874e-24	2.04038e-18	3	195613641	TNK2	Body-island
cg01361351	female	-0.156328	0.0139097	5.60206e-24	2.09012e-18	22	29467363		IGR-island
cg25817430	female	0.108811	0.00968365	5.69665e-24	2.12541e-18	12	102928914		IGR-opensea
cg23683800	female	-0.275855	0.0245517	5.73496e-24	2.1397e-18	10	115086103		IGR-opensea
cg26175448	female	-0.243732	0.0216937	5.75672e-24	2.14782e-18	17	39072167		IGR-opensea
cg16753167	female	0.144933	0.0129065	6.00898e-24	2.24194e-18	13	113642487	MCF2L	Body-opensea
cg05049448	female	0.197808	0.0176249	6.29576e-24	2.34894e-18	7	2321355	SNX8	Body-shelf
cg25083091	female	0.136464	0.0121717	6.87118e-24	2.56362e-18	8	10646690	PINX1	Body-opensea
cg25141264	female	0.153455	0.0136987	7.37726e-24	2.75244e-18	22	47560578	TBC1D22A	Body-shelf
cg20440575	female	-0.0403316	0.00360623	8.46183e-24	3.15709e-18	5	68462711	CCNB1	TSS1500-island
cg01304894	female	0.0968898	0.00867326	9.31218e-24	3.47436e-18	16	70715140	MTSS1L	Body-shore
cg18343862	female	0.0700236	0.00626941	9.453e-24	3.5269e-18	11	10590003	LYVE1	1stExon-opensea
cg10202693	female	0.0999698	0.00895062	9.45625e-24	3.52811e-18	1	26142709	SEPN1	3'UTR-shelf
cg22779765	female	0.101378	0.00908476	1.01831e-23	3.79929e-18	14	103369786	TRAF3	Body-opensea
cg18542639	female	0.136897	0.0122681	1.02124e-23	3.81023e-18	15	41275117	INO80	Body-opensea
cg18410627	female	-0.064175	0.00575156	1.02852e-23	3.8374e-18	9	129677882	RALGPS1	5'UTR-island
cg05287314	female	-0.158287	0.014189	1.04588e-23	3.90216e-18	20	822198	FAM110A	5'UTR-island
cg15874481	female	0.181493	0.016326	1.39885e-23	5.2191e-18	11	70517057	SHANK2	Body-opensea
cg12426196	female	-0.178351	0.0160434	1.39936e-23	5.221e-18	1	161008826	TSTD1	TSS200-island
cg21783847	female	-0.162222	0.0146005	1.46388e-23	5.4617e-18	1	167522422	CREG1	Body-shore
cg12019475	female	0.106129	0.0095625	1.60467e-23	5.98699e-18	6	45700739		IGR-opensea
cg08779982	female	0.16996	0.0153262	1.71642e-23	6.40392e-18	16	2131825	TSC2	Body-shelf
cg08305799	female	-0.307215	0.0277037	1.7183e-23	6.41092e-18	8	30580804	GSR	Body-shelf
cg16478977	female	0.186421	0.0168124	1.73153e-23	6.46029e-18	14	77689345	TMEM63C	Body-opensea
cg14472366	female	0.153296	0.0138254	1.73543e-23	6.47485e-18	13	20875915		IGR-island
cg13483597	female	-0.165342	0.0149124	1.74167e-23	6.49813e-18	16	31488438	TGFB1I1	Body-island
cg21368161	female	-0.158384	0.0142896	1.79042e-23	6.68002e-18	7	1596136	TMEM184A	TSS200-opensea
cg06769423	female	0.113217	0.0102163	1.81531e-23	6.77289e-18	4	73920648	COX18	3'UTR-opensea
cg09962925	female	0.194986	0.0175994	1.85472e-23	6.91993e-18	16	86228639		IGR-opensea
cg01973483	female	0.126058	0.011378	1.85578e-23	6.92387e-18	12	123591123	PITPNM2	5'UTR-opensea
cg22827250	female	0.158419	0.0143053	1.92573e-23	7.18484e-18	5	134363823	PITX1	3'UTR-island
cg00446235	female	-0.168519	0.0152184	1.93585e-23	7.22262e-18	1	161008644	TSTD1	Body-island
cg05543456	female	0.0989524	0.0089393	1.99505e-23	7.44351e-18	4	2256532	MXD4	Body-opensea
cg15414028	female	-0.221331	0.0200018	2.05247e-23	7.65773e-18	10	14644188	FAM107B	Body-shore
cg18649198	female	0.165615	0.014972	2.1136e-23	7.88581e-18	7	151477667	PRKAG2	Body-shelf
cg17780682	female	0.157758	0.0142643	2.14579e-23	8.00591e-18	17	913998	ABR	Body-shore
cg13860387	female	0.0765983	0.00692773	2.19244e-23	8.17994e-18	6	26456230		IGR-shelf
cg07267550	female	0.216396	0.0195786	2.26007e-23	8.43229e-18	17	74536269	PRCD	1stExon-shore
cg04312358	female	-0.149698	0.0135451	2.27448e-23	8.48605e-18	19	41197166	NUMBL	TSS1500-shore
cg19277182	female	0.182033	0.0164728	2.29789e-23	8.57339e-18	17	80560098	FOXK2	3'UTR-shore
cg07883124	female	0.193708	0.0175385	2.39846e-23	8.94859e-18	13	113634042	MCF2L	Body-island
cg27235726	female	0.118088	0.0107023	2.59958e-23	9.69899e-18	7	750819	PRKAR1B	Body-island
cg21060085	female	-0.136442	0.012377	2.80275e-23	1.0457e-17	4	40721181		IGR-opensea
cg10982851	female	0.10958	0.00995206	3.09175e-23	1.15353e-17	7	4747166	FOXK1	Body-opensea
cg06766367	female	-0.176815	0.0160589	3.09926e-23	1.15633e-17	16	67062687	CBFB	TSS1500-island
cg12710531	female	0.0989015	0.00898288	3.10939e-23	1.16011e-17	11	88032774	CTSC	Body-opensea
cg13412545	female	0.219521	0.0199396	3.12479e-23	1.16585e-17	5	172175765		IGR-island
cg00135497	female	0.202382	0.0184039	3.43474e-23	1.28149e-17	4	155661849		IGR-island
cg06525280	female	-0.205544	0.0186983	3.53858e-23	1.32024e-17	2	216177303	ATIC	Body-shore
cg26985471	female	0.072831	0.00662564	3.54842e-23	1.32391e-17	6	32085577	ATF6B	Body-opensea
cg09422450	female	0.235722	0.0214474	3.59036e-23	1.33956e-17	16	79623618		IGR-island
cg08698219	female	0.123973	0.0112865	3.77005e-23	1.4066e-17	2	9459386	ASAP2	Body-island
cg20000464	female	0.0908525	0.0082798	4.10447e-23	1.53137e-17	11	76261997	C11orf30	3'UTR-opensea
cg23840027	female	0.162882	0.0148445	4.1116e-23	1.53403e-17	1	29225533	EPB41	5'UTR-opensea
cg02350627	female	-0.0544072	0.00495927	4.16557e-23	1.55416e-17	7	94138909	CASD1	TSS1500-shore
cg07454556	female	0.0988907	0.00901917	4.36618e-23	1.62901e-17	2	54754901	RPL23AP32	TSS1500-opensea
cg17941807	female	0.06641	0.00605783	4.42626e-23	1.65143e-17	6	15509823	JARID2	Body-opensea
cg24766041	female	0.154092	0.0140601	4.53159e-23	1.69073e-17	19	17375445	USHBP1	5'UTR-opensea
cg07519259	female	0.153376	0.0139984	4.62839e-23	1.72684e-17	2	31520167		IGR-opensea
cg01242619	female	-0.133135	0.0121512	4.63152e-23	1.72801e-17	8	145049472	PLEC1	Body-island
cg04085768	female	0.151297	0.0138088	4.63449e-23	1.72912e-17	4	113333052	ALPK1	Body-island
cg26692791	female	0.154218	0.014095	5.19048e-23	1.93656e-17	1	32593259	KPNA6	Body-opensea
cg03380342	female	0.0966661	0.00883547	5.21419e-23	1.9454e-17	4	178400255		IGR-opensea
cg09635874	female	0.152668	0.0139542	5.21701e-23	1.94646e-17	13	98952518	FARP1	Body-opensea
cg11563680	female	0.198223	0.0181271	5.43367e-23	2.02729e-17	6	100917397		IGR-island
cg05582340	female	0.0930579	0.00851396	5.645e-23	2.10614e-17	12	113630080	C12orf52	3'UTR-opensea
cg26624021	female	0.143119	0.0131015	5.9118e-23	2.20568e-17	16	56995739	CETP	TSS200-opensea
cg04028616	female	0.101819	0.00932094	5.91958e-23	2.20858e-17	16	84424282	ATP2C2	Body-opensea
cg18693985	female	0.145448	0.0133176	6.01659e-23	2.24478e-17	5	173351052	CPEB4	Body-opensea
cg19868593	female	-0.16352	0.0149738	6.06429e-23	2.26258e-17	6	31744816	C6orf27	5'UTR-opensea
cg03855388	female	0.0554383	0.00507713	6.11859e-23	2.28283e-17	11	68580018	CPT1A	Body-opensea
cg26077811	female	-0.204513	0.0187505	6.69825e-23	2.4991e-17	11	119232263	USP2	Body-shelf
cg15701111	female	0.161334	0.0147998	7.00169e-23	2.61232e-17	12	52685334	KRT81	TSS200-shore
cg16423756	female	-0.0974857	0.00894896	7.40821e-23	2.76399e-17	11	122526190	UBASH3B	TSS1500-shore
cg04291025	female	-0.168864	0.0155017	7.42409e-23	2.76991e-17	15	69746140	RPLP1	Body-shore
cg27399481	female	0.0913536	0.00839154	7.81203e-23	2.91465e-17	17	78069245	CCDC40	Body-opensea
cg14911690	female	-0.118391	0.0108759	7.85368e-23	2.93019e-17	19	19729395	PBX4	1stExon-island
cg14331619	female	0.140837	0.0129713	9.67578e-23	3.61002e-17	9	35909996	LOC158376	Body-opensea
cg21917524	female	0.111986	0.0103142	9.68547e-23	3.61363e-17	11	74200334		IGR-shelf
cg01525669	female	0.09272	0.00854508	1.01868e-22	3.80069e-17	13	107211833	ARGLU1	Body-opensea
cg17468543	female	0.0467781	0.00431347	1.06549e-22	3.97531e-17	8	131358890	ASAP1	Body-opensea
cg07479030	female	0.157949	0.0145711	1.10424e-22	4.11989e-17	13	113496719	ATP11A	Body-shore
cg07300534	female	0.117964	0.0108835	1.11317e-22	4.1532e-17	16	81726931	CMIP	Body-opensea
cg25076980	female	0.132798	0.0122572	1.15058e-22	4.29279e-17	6	31638016	LY6G5B	TSS1500-shelf
cg02452586	female	0.172513	0.0159326	1.20866e-22	4.50947e-17	1	233497903	KIAA1804	Body-island
cg01962471	female	0.148834	0.0137489	1.2309e-22	4.59246e-17	6	157876936	ZDHHC14	Body-opensea
cg26172812	female	-0.126611	0.0117011	1.27509e-22	4.75733e-17	19	48837548	TMEM143	Body-island
cg02859319	female	0.0807581	0.00746399	1.28238e-22	4.78454e-17	3	50674664	MAPKAPK3	Body-opensea
cg04787317	female	0.0532018	0.00491768	1.29383e-22	4.82727e-17	3	38009934	CTDSPL	Body-opensea
cg05516390	female	-0.281321	0.0260251	1.38171e-22	5.15513e-17	16	73088677	ZFHX3	5'UTR-shelf
cg13249591	female	-0.121585	0.0112479	1.38251e-22	5.15813e-17	1	151966892	S100A10	TSS200-island
cg00529567	female	0.0795227	0.00735677	1.38358e-22	5.16212e-17	3	124772735	HEG1	Body-shore
cg03295274	female	0.14532	0.0134442	1.38667e-22	5.17363e-17	13	50190584		IGR-opensea
cg04722901	female	0.117258	0.0108513	1.42088e-22	5.30128e-17	5	16812392	MYO10	Body-opensea
cg05143420	female	0.0751903	0.00696275	1.49588e-22	5.5811e-17	14	64926333	MTHFD1	3'UTR-opensea
cg20019985	female	0.237407	0.0220054	1.6154e-22	6.02703e-17	11	32008961		IGR-island
cg12231340	female	0.148293	0.0137473	1.634e-22	6.09643e-17	12	52685221	KRT81	1stExon-island
cg02853152	female	-0.15042	0.0139543	1.7275e-22	6.44526e-17	4	6690702		IGR-opensea
cg00831931	female	0.135913	0.0126091	1.73459e-22	6.47171e-17	10	114823094	TCF7L2	Body-opensea
cg12492087	female	0.267911	0.0248651	1.79225e-22	6.68685e-17	15	42749885	ZFP106	TSS200-opensea
cg23565821	female	-0.225112	0.0209017	1.85364e-22	6.91589e-17	6	33385056	CUTA	Body-shore
cg13772768	female	0.076512	0.00710544	1.88042e-22	7.01582e-17	2	122370354	CLASP1	5'UTR-opensea
cg18034637	female	0.251319	0.0233559	1.99025e-22	7.42559e-17	11	111846087	DIXDC1	Body-shore
cg04013090	female	-0.105267	0.00978783	2.07362e-22	7.73662e-17	8	67342485	RRS1	1stExon-shore
cg05614408	female	0.0850933	0.00791811	2.20371e-22	8.22198e-17	5	94901279	ARSK	Body-opensea
cg17941572	female	0.215714	0.0200792	2.26162e-22	8.43805e-17	1	63784454		IGR-island
cg01308087	female	0.148246	0.0138019	2.29938e-22	8.57892e-17	2	145137193		IGR-opensea
cg18263455	female	0.187773	0.0174857	2.33847e-22	8.72477e-17	15	69374595	MIR548H4	Body-opensea
cg20979153	female	-0.249109	0.0231978	2.34135e-22	8.73554e-17	20	52199748	ZNF217	TSS200-shore
cg02028758	female	0.112015	0.010435	2.41156e-22	8.99747e-17	16	85168709		IGR-shelf
cg00369677	female	0.0491733	0.0045814	2.43412e-22	9.08165e-17	2	237010048	AGAP1	Body-shore
cg11015549	female	-0.117461	0.0109467	2.48727e-22	9.27994e-17	19	1026207	CNN2	TSS200-shore
cg16385763	female	0.149222	0.0139078	2.50462e-22	9.34469e-17	1	21586831	ECE1	Body-opensea
cg20033619	female	0.104453	0.00974388	2.68776e-22	1.0028e-16	15	39523161		IGR-opensea
cg04868238	female	0.158653	0.0148039	2.74544e-22	1.02432e-16	8	22501100	FLJ14107	TSS1500-opensea
cg17074821	female	0.104384	0.00974199	2.78772e-22	1.04009e-16	11	75046354	ARRB1	Body-opensea
cg05516272	female	0.134855	0.0125866	2.80262e-22	1.04565e-16	11	66311334	ZDHHC24	Body-shore
cg14410016	female	0.198136	0.0184932	2.80609e-22	1.04695e-16	2	176986659	HOXD9	TSS1500-island
cg11710211	female	0.111137	0.0103741	2.83006e-22	1.05589e-16	19	56609064	ZNF787	Body-island
cg16982077	female	0.133342	0.0124479	2.84824e-22	1.06267e-16	5	138842197	ECSCR	1stExon-opensea
cg27515052	female	0.116504	0.0108778	2.88436e-22	1.07615e-16	8	8513104		IGR-opensea
cg15672768	female	0.214117	0.0200174	3.19265e-22	1.19117e-16	5	140741220	PCDHGA4	Body-island
cg02909991	female	-0.174743	0.0163418	3.27833e-22	1.22314e-16	17	76127829	TMC8	Body-island
cg10820904	female	0.114659	0.0107249	3.32941e-22	1.2422e-16	17	64412745	PRKCA	Body-opensea
cg26140475	female	-0.213389	0.0199629	3.36945e-22	1.25714e-16	8	126525558		IGR-opensea
cg13705888	female	0.11656	0.0109094	3.49271e-22	1.30312e-16	6	32131722	EGFL8	TSS1500-shelf
cg25053413	female	-0.222772	0.0208514	3.50916e-22	1.30926e-16	14	50467526	C14orf182	Body-shelf
cg07647822	female	-0.203561	0.0190638	3.66479e-22	1.36732e-16	3	24537349	THRB	TSS1500-island
cg18110444	female	-0.142928	0.0133929	3.8294e-22	1.42874e-16	2	136743460	DARS	TSS1500-island
cg15759721	female	-0.28481	0.0267112	4.10457e-22	1.53141e-16	17	57918630	MIR21	Body-opensea
cg18081393	female	0.107241	0.0100656	4.36555e-22	1.62878e-16	17	733750	NXN	Body-opensea
cg05386726	female	0.145885	0.0136927	4.36564e-22	1.62881e-16	1	48030004		IGR-opensea
cg19588399	female	-0.147407	0.013837	4.39949e-22	1.64144e-16	1	27668445	SYTL1	TSS200-opensea
cg08539620	female	-0.124547	0.011694	4.48667e-22	1.67397e-16	17	40118030	CNP	TSS1500-shore
cg13668646	female	0.0575441	0.00540359	4.529e-22	1.68976e-16	6	46849146	GPR116	Body-opensea
cg23533267	female	0.266982	0.0250721	4.55135e-22	1.6981e-16	11	120942758	TBCEL	Body-opensea
cg18901278	female	-0.181549	0.0170494	4.55772e-22	1.70048e-16	17	76128531	TMC8	Body-shore
cg12159259	female	0.165268	0.0155245	4.65126e-22	1.73538e-16	13	113642515	MCF2L	Body-opensea
cg27559399	female	-0.205391	0.0192937	4.65516e-22	1.73683e-16	1	201450997		IGR-island
cg09476997	female	0.197103	0.018526	4.87462e-22	1.81871e-16	16	2087932	SLC9A3R2	Body-shore
cg21842967	female	0.11348	0.0106664	4.88371e-22	1.8221e-16	14	53508673	DDHD1	3'UTR-opensea
cg03013422	female	-0.0612471	0.00576064	5.14283e-22	1.91878e-16	12	125550350	AACS	Body-shore
cg16829244	female	0.131704	0.0123954	5.407e-22	2.01734e-16	10	134491593	INPP5A	Body-opensea
cg23759826	female	-0.108138	0.010178	5.42994e-22	2.0259e-16	7	35735287	HERPUD2	TSS1500-shore
cg00216961	female	-0.301582	0.0283883	5.47665e-22	2.04333e-16	12	6054731	ANO2	Body-opensea
cg07484727	female	0.145389	0.0136863	5.4973e-22	2.05103e-16	16	1587309	IFT140	Body-shore
cg01363284	female	0.139188	0.013104	5.54568e-22	2.06908e-16	16	85695124	KIAA0182	Body-opensea
cg11697169	female	0.181492	0.0171149	6.30792e-22	2.35347e-16	8	27457461	CLU	Body-opensea
cg20957164	female	0.0951906	0.00897859	6.41865e-22	2.39479e-16	3	12965323	IQSEC1	Body-opensea
cg04009429	female	0.118565	0.0111949	6.95914e-22	2.59644e-16	7	100883125	FIS1	Body-opensea
cg04098263	female	0.161325	0.0152338	7.01491e-22	2.61725e-16	6	2382649		IGR-opensea
cg04904318	female	0.280654	0.0265035	7.04546e-22	2.62865e-16	17	46607828	HOXB1	1stExon-island
cg07546078	female	0.106322	0.0100461	7.36126e-22	2.74647e-16	2	69742449	AAK1	Body-opensea
cg16659510	female	0.0998347	0.00943757	7.63292e-22	2.84783e-16	16	87996870	BANP	5'UTR-opensea
cg19847601	female	0.112933	0.0106773	7.71841e-22	2.87972e-16	15	99670282	SYNM	Body-opensea
cg08188368	female	0.0882619	0.00834737	7.90881e-22	2.95076e-16	2	233680285	GIGYF2	Body-opensea
cg02624332	female	0.0624525	0.00590719	7.98643e-22	2.97972e-16	3	101504465	FAM55C	Body-opensea
cg26319363	female	0.146435	0.0138513	8.00721e-22	2.98747e-16	4	753903	PCGF3	Body-shore
cg15676015	female	-0.0482269	0.00456203	8.04088e-22	3.00004e-16	11	67272636	PITPNM1	5'UTR-island
cg09882144	female	0.116883	0.0110594	8.20635e-22	3.06177e-16	12	125339904	SCARB1	Body-opensea
cg19570924	female	0.167941	0.0158947	8.37651e-22	3.12526e-16	10	3457015		IGR-opensea
cg18872604	female	-0.0826728	0.00782791	8.65956e-22	3.23086e-16	11	64002754	VEGFB	Body-shore
cg03971454	female	0.190881	0.0180839	9.04908e-22	3.37619e-16	1	43770557	TIE1	Body-island
cg19780563	female	0.109739	0.0103978	9.1372e-22	3.40907e-16	10	94594494	EXOC6	5'UTR-opensea
cg09887059	female	0.281262	0.0266537	9.24218e-22	3.44824e-16	12	113916664		IGR-island
cg04462652	female	-0.149037	0.0141338	9.78119e-22	3.64934e-16	2	133429088	LYPD1	TSS1500-shore
cg03460001	female	-0.100578	0.00954355	1.02142e-21	3.81089e-16	7	101460955	CUX1	Body-island
cg09645138	female	0.113272	0.0107493	1.03084e-21	3.84603e-16	5	82155751		IGR-opensea
cg23268290	female	0.140408	0.0133251	1.03443e-21	3.85943e-16	17	6390502	PITPNM3	Body-opensea
cg08412188	female	-0.204056	0.0193747	1.07322e-21	4.00415e-16	7	74074356	GTF2I	5'UTR-shore
cg25406779	female	-0.167919	0.0159446	1.07907e-21	4.02599e-16	19	40732712	CNTD2	TSS200-shore
cg22455529	female	0.0822959	0.00781822	1.12128e-21	4.18346e-16	17	73495353	KIAA0195	Body-shelf
cg04194947	female	0.186914	0.0177589	1.13048e-21	4.21781e-16	2	177012191		IGR-shore
cg13564459	female	-0.168025	0.0159647	1.13302e-21	4.22727e-16	14	62004353	PRKCH	Body-opensea
cg09395443	female	0.174032	0.0165393	1.1537e-21	4.30443e-16	7	4746437	FOXK1	Body-opensea
cg06215107	female	0.206955	0.019694	1.27615e-21	4.76129e-16	4	151504725	LRBA	Body-island
cg10216414	female	-0.159166	0.0151483	1.28876e-21	4.80835e-16	2	101868516	C2orf29	TSS1500-shore
cg24060730	female	0.175148	0.0166711	1.29991e-21	4.84992e-16	7	116193811	CAV1	Body-opensea
cg16336751	female	-0.27576	0.0262523	1.31762e-21	4.91603e-16	5	35618055	SPEF2	5'UTR-island
cg24988684	female	-0.218603	0.0208161	1.34297e-21	5.01058e-16	17	76128556	TMC8	Body-shore
cg23479922	female	0.304653	0.0290195	1.37697e-21	5.13744e-16	5	16179633	2024-03-11	1stExon-island
cg11075346	female	-0.0802779	0.00764789	1.39198e-21	5.19344e-16	7	35735308	HERPUD2	TSS1500-shore
cg24393699	female	-0.0745862	0.00710677	1.40893e-21	5.25668e-16	1	197744782	DENND1B	TSS200-island
cg04231085	female	0.163198	0.0155541	1.43831e-21	5.3663e-16	16	85561302		IGR-opensea
cg27080119	female	-0.214048	0.0204091	1.48527e-21	5.54152e-16	4	120987409	MAD2L1	Body-shore
cg16489192	female	-0.080921	0.0077185	1.52796e-21	5.7008e-16	7	75678113	MDH2	Body-shore
cg23079522	female	0.123163	0.0117502	1.55366e-21	5.79667e-16	3	160569628	PPM1L	Body-opensea
cg26054057	female	0.14258	0.0136083	1.60391e-21	5.98414e-16	3	38010715	CTDSPL	Body-opensea
cg15084543	female	0.278763	0.0266072	1.60896e-21	6.00299e-16	1	79472408	ELTD1	5'UTR-island
cg11207983	female	-0.13796	0.0131758	1.68461e-21	6.28524e-16	1	150254477	C1orf51	TSS1500-island
cg07787771	female	0.264111	0.0252261	1.69665e-21	6.33018e-16	10	104341826	SUFU	Body-opensea
cg13153009	female	0.0871567	0.0083347	1.8619e-21	6.94669e-16	8	144561626	ZC3H3	Body-shelf
cg10628699	female	0.130301	0.0124798	2.09511e-21	7.81681e-16	13	103531040	LOC121952	TSS1500-opensea
cg19449565	female	0.149372	0.0143098	2.13494e-21	7.96543e-16	2	240230892	HDAC4	Body-opensea
cg08455275	female	-0.158753	0.0152113	2.16424e-21	8.07474e-16	8	145047979	PLEC1	Body-island
cg20603543	female	0.0745639	0.0071454	2.1855e-21	8.15405e-16	6	155584968	TFB1M	Body-opensea
cg10140240	female	0.054457	0.00521909	2.20216e-21	8.2162e-16	17	76220672	BIRC5	3'UTR-opensea
cg13058623	female	-0.277932	0.0266447	2.25302e-21	8.40596e-16	1	233040477		IGR-opensea
cg03331300	female	-0.0664814	0.0063747	2.28845e-21	8.53815e-16	2	169102866	STK39	Body-shore
cg10011746	female	0.0588014	0.00564332	2.44975e-21	9.13996e-16	16	89865162	FANCA	3'UTR-opensea
cg19244312	female	0.0968005	0.00929497	2.54775e-21	9.50561e-16	3	171964315	FNDC3B	Body-opensea
cg05546264	female	0.111905	0.0107467	2.57235e-21	9.59738e-16	4	187507476		IGR-opensea
cg06540636	female	-0.0638194	0.0061299	2.60677e-21	9.72579e-16	19	44174071	PLAUR	Body-shore
cg03970899	female	0.173654	0.0166815	2.63038e-21	9.81389e-16	22	19710091	GP1BB	TSS1500-island
cg24619785	female	0.0569326	0.00546955	2.64814e-21	9.88014e-16	2	9416069	ASAP2	Body-opensea
cg03290827	female	0.131727	0.0126591	2.71275e-21	1.01212e-15	17	75180760	SEC14L1	Body-opensea
cg08790487	female	0.0872237	0.0083842	2.76041e-21	1.0299e-15	5	179135308	CANX	Body-opensea
cg17602167	female	-0.0755022	0.00726121	2.87014e-21	1.07084e-15	6	36561558	SFRS3	TSS1500-shore
cg02034689	female	0.219086	0.0210777	2.95091e-21	1.10098e-15	5	54518136		IGR-shore
cg18563999	female	-0.202342	0.0194739	3.03365e-21	1.13185e-15	12	54785003	ZNF385A	Body-island
cg06102127	female	0.0851808	0.00820063	3.10855e-21	1.15979e-15	3	65924259	MAGI1	Body-opensea
cg21496803	female	0.119852	0.0115429	3.19906e-21	1.19356e-15	6	167029080	RPS6KA2	Body-shelf
cg20971488	female	0.125319	0.0120737	3.28473e-21	1.22553e-15	1	228786295	DUSP5P	Body-shore
cg08931404	female	0.0945406	0.00911091	3.35581e-21	1.25205e-15	13	29227083		IGR-opensea
cg06745704	female	-0.249292	0.024038	3.50406e-21	1.30736e-15	1	27668325	SYTL1	TSS200-opensea
cg08618451	female	0.13363	0.012886	3.51766e-21	1.31243e-15	5	96117388	ERAP1	Body-opensea
cg11423556	female	0.119663	0.0115392	3.51804e-21	1.31257e-15	2	69728114	AAK1	Body-opensea
cg24082460	female	0.0842289	0.00812883	3.74165e-21	1.396e-15	4	3345374	RGS12	Body-shelf
cg01205299	female	0.0782443	0.00755682	3.95589e-21	1.47593e-15	6	133376535		IGR-opensea
cg25412641	female	0.113499	0.0109675	4.11703e-21	1.53605e-15	6	157877120	ZDHHC14	Body-opensea
cg09248007	female	-0.0693396	0.00670226	4.20675e-21	1.56953e-15	16	14164860	MKL2	TSS1500-island
cg12048674	female	-0.0463918	0.0044854	4.29573e-21	1.60273e-15	1	205649805	SLC45A3	TSS200-island
cg19358397	female	-0.173045	0.0167309	4.29622e-21	1.60291e-15	11	1794018		IGR-opensea
cg09672200	female	0.0472462	0.00456808	4.30067e-21	1.60457e-15	7	1117916	C7orf50	Body-shelf
cg00870166	female	-0.158433	0.0153201	4.3372e-21	1.6182e-15	8	74660057	STAU2	TSS1500-shore
cg23824902	female	0.0839717	0.00812028	4.35453e-21	1.62466e-15	1	9619882	SLC25A33	Body-opensea
cg20779964	female	0.2011	0.0194776	4.90455e-21	1.82988e-15	20	54580070	CBLN4	TSS200-island
cg12054453	female	-0.0932093	0.00903297	5.12039e-21	1.91041e-15	17	57915717	TMEM49	Body-opensea
cg06551168	female	0.148955	0.0144368	5.1602e-21	1.92526e-15	19	308524	MIER2	Body-island
cg05154546	female	0.145052	0.0140607	5.22149e-21	1.94813e-15	4	3373555	RGS12	Body-shore
cg23179181	female	-0.112887	0.0109433	5.23892e-21	1.95463e-15	17	27945461	CORO6	Body-shore
cg20298015	female	0.116467	0.0112949	5.40314e-21	2.0159e-15	3	33316001		IGR-shelf
cg17466510	female	0.102214	0.00991384	5.45088e-21	2.03371e-15	1	116877566		IGR-opensea
cg02158567	female	0.125597	0.0121823	5.46911e-21	2.04051e-15	2	169672780	NOSTRIN	5'UTR-opensea
cg17419049	female	0.071546	0.00694027	5.50665e-21	2.05452e-15	2	74097688		IGR-opensea
cg11724984	female	0.11056	0.010725	5.51429e-21	2.05737e-15	12	121890864	KDM2B	Body-island
cg19366147	female	0.113876	0.0110513	5.69003e-21	2.12294e-15	8	1717660	CLN8	5'UTR-opensea
cg13975303	female	-0.107743	0.0104587	5.8009e-21	2.16431e-15	22	36850894		IGR-island
cg24527881	female	-0.212942	0.0206803	6.00797e-21	2.24156e-15	1	45187630	C1orf228	Body-shelf
cg13858803	female	0.106131	0.0103109	6.17302e-21	2.30314e-15	9	33140269	B4GALT1	Body-opensea
cg04576707	female	0.1146	0.0111346	6.21295e-21	2.31804e-15	4	71811504	MOBKL1A	Body-opensea
cg08296903	female	0.128713	0.0125114	6.42605e-21	2.39754e-15	16	14029456	ERCC4	Body-opensea
cg15540371	female	-0.0875756	0.00851303	6.44463e-21	2.40448e-15	14	105553520		IGR-island
cg10481740	female	-0.0609592	0.00592665	6.52163e-21	2.43321e-15	4	1857103	LETM1	Body-island
cg14156751	female	0.234961	0.0228443	6.53417e-21	2.43788e-15	10	50976571		IGR-island
cg00781795	female	0.167983	0.0163407	6.79203e-21	2.53409e-15	18	55815677	NEDD4L	5'UTR-opensea
cg25252598	female	-0.190342	0.0185248	7.04535e-21	2.62861e-15	12	6641602		IGR-shore
cg08491487	female	0.19747	0.0192189	7.05625e-21	2.63267e-15	6	30039130	RNF39	Body-island
cg13942922	female	-0.278629	0.0271367	7.43519e-21	2.77405e-15	2	238383665		IGR-island
cg19533977	female	-0.302205	0.0294528	7.82185e-21	2.91832e-15	17	57719682	CLTC	Body-opensea
cg24186398	female	0.114511	0.0111616	7.89785e-21	2.94667e-15	11	1321530	TOLLIP	Body-opensea
cg23627350	female	0.0647188	0.00630901	7.9658e-21	2.97202e-15	1	183095301	LAMC1	Body-opensea
cg23337845	female	0.104881	0.010232	8.43712e-21	3.14787e-15	4	170641374	CLCN3	3'UTR-opensea
cg06626113	female	0.0661794	0.0064565	8.44977e-21	3.15259e-15	4	26027696		IGR-shelf
cg04213384	female	0.175384	0.0171149	8.61092e-21	3.21272e-15	13	98960589	FARP1	Body-opensea
cg09841704	female	0.139542	0.0136174	8.6178e-21	3.21528e-15	15	81295984	MESDC1	1stExon-shore
cg12141030	female	-0.17061	0.0166589	9.001e-21	3.35825e-15	3	44803447	KIAA1143	TSS1500-island
cg12670943	female	0.108759	0.0106283	9.56941e-21	3.57033e-15	22	43006541	POLDIP3	Body-shelf
cg06663644	female	-0.157315	0.0153799	9.87543e-21	3.6845e-15	19	40971204	BLVRB	Body-shore
cg26271876	female	0.0694313	0.0067902	1.01222e-20	3.77656e-15	2	54754922	RPL23AP32	TSS1500-opensea
cg23801057	female	0.126688	0.0124046	1.10647e-20	4.12823e-15	12	121569969	P2RX7	TSS1500-opensea
cg14008686	female	0.285739	0.0279922	1.14864e-20	4.28556e-15	11	64183154		IGR-opensea
cg16725974	female	0.204547	0.0200679	1.28177e-20	4.78224e-15	14	64341178	SYNE2	5'UTR-opensea
cg00129196	female	-0.114944	0.0112778	1.28847e-20	4.80727e-15	2	20190016	WDR35	TSS200-island
cg14266527	female	0.152194	0.0149352	1.30479e-20	4.86814e-15	4	151501298	LRBA	Body-island
cg02196651	female	-0.205076	0.0201249	1.30555e-20	4.87097e-15	4	54457842	LNX1	TSS200-opensea
cg10081811	female	0.12996	0.0127588	1.34636e-20	5.02324e-15	12	57390700		IGR-opensea
cg12267021	female	-0.0589102	0.00578754	1.41806e-20	5.29074e-15	11	71790932	NUMA1	5'UTR-shore
cg02886591	female	0.109615	0.0107697	1.42596e-20	5.32022e-15	17	45773570	TBKBP1	1stExon-island
cg24762359	female	-0.165271	0.0162422	1.4531e-20	5.4215e-15	13	25254447	ATP12A	TSS1500-island
cg04751009	female	0.0576377	0.00566533	1.47095e-20	5.48807e-15	14	76123777	C14orf1	Body-shelf
cg11441693	female	-0.21685	0.0213282	1.54141e-20	5.75096e-15	17	48194635	SAMD14	Body-island
cg27110206	female	0.123471	0.0121482	1.58207e-20	5.90268e-15	12	54750276		IGR-opensea
cg01090433	female	-0.223693	0.0220123	1.5998e-20	5.96882e-15	16	82673506	CDH13	Body-opensea
cg10783149	female	0.163948	0.0161334	1.60187e-20	5.97655e-15	14	55707866		IGR-opensea
cg08404513	female	0.152555	0.0150148	1.62173e-20	6.05065e-15	7	72868821	BAZ1B	Body-opensea
cg27149973	female	-0.28385	0.0279412	1.63917e-20	6.1157e-15	17	74868725	MGAT5B	Body-shelf
cg19368031	female	0.138139	0.0136003	1.65997e-20	6.19333e-15	10	76688843	MYST4	Body-opensea
cg18006637	female	-0.289839	0.0285523	1.73311e-20	6.46621e-15	4	89713820	FAM13A	Body-opensea
cg08404702	female	0.122013	0.0120217	1.75441e-20	6.54565e-15	16	2133388	TSC2	Body-shore
cg07093324	female	-0.31121	0.0306648	1.76334e-20	6.57899e-15	2	114652143	ACTR3	Body-shelf
cg02686681	female	-0.0641868	0.00632495	1.77047e-20	6.60557e-15	2	241853954		IGR-shore
cg13466383	female	-0.181647	0.0179036	1.80153e-20	6.72148e-15	1	161008705	TSTD1	5'UTR-island
cg22670033	female	0.158891	0.0156731	1.90949e-20	7.12427e-15	5	180646608		IGR-shore
cg05422883	female	0.127756	0.0126082	1.97953e-20	7.38558e-15	2	43072932		IGR-opensea
cg24929966	female	0.0875006	0.00863614	1.99236e-20	7.43345e-15	1	10726865	CASZ1	Body-shore
cg22622834	female	-0.0612757	0.00604898	2.02104e-20	7.54046e-15	1	204367853		IGR-opensea
cg14462321	female	0.0911524	0.00900032	2.05433e-20	7.66467e-15	9	137232372	RXRA	Body-shelf
cg06884882	female	-0.178501	0.0176412	2.19717e-20	8.19758e-15	1	45187946	C1orf228	Body-shore
cg18145026	female	0.149606	0.0147989	2.34792e-20	8.76005e-15	8	99180585		IGR-opensea
cg11634248	female	0.120825	0.0119632	2.51599e-20	9.38709e-15	11	67926133	SUV420H1	Body-opensea
cg11993173	female	-0.215585	0.021358	2.62365e-20	9.78879e-15	8	54857695	RGS20	Body-opensea
cg09622982	female	-0.171957	0.0170452	2.73147e-20	1.01911e-14	2	133428523	LYPD1	TSS200-island
cg05471495	female	-0.161465	0.0160111	2.80588e-20	1.04687e-14	2	101369330		IGR-opensea
cg03895784	female	0.118209	0.011724	2.8458e-20	1.06176e-14	16	88822883	FAM38A	Body-shore
cg20903926	female	0.0999819	0.00991725	2.86699e-20	1.06967e-14	1	55271677	C1orf177	TSS200-island
cg26422656	female	0.0982751	0.00975421	3.00427e-20	1.12089e-14	2	238585054	LRRFIP1	Body-opensea
cg08042538	female	-0.165126	0.0163967	3.1035e-20	1.15791e-14	20	821854	FAM110A	5'UTR-island
cg06499213	female	0.106368	0.0105678	3.22402e-20	1.20288e-14	6	111888840	TRAF3IP2	Body-opensea
cg19010490	female	0.139691	0.0138863	3.36127e-20	1.25408e-14	15	37388127	MEIS2	Body-shore
cg07307484	female	0.0801147	0.00796481	3.38637e-20	1.26345e-14	17	4743324	MINK1	Body-opensea
cg07355926	female	0.20061	0.0199795	3.85054e-20	1.43663e-14	19	1852127		IGR-island
cg20476058	female	0.122421	0.0121966	3.94893e-20	1.47334e-14	2	128438738	LIMS2	5'UTR-opensea
cg16797777	female	-0.0726417	0.00723782	3.97432e-20	1.48281e-14	6	160389717	IGF2R	TSS1500-shore
cg03364683	female	-0.146338	0.0145822	4.00415e-20	1.49394e-14	4	169402298	DDX60L	TSS1500-shore
cg13148085	female	-0.149929	0.0149431	4.06307e-20	1.51592e-14	17	65242711	HELZ	TSS1500-shore
cg26959247	female	0.0651613	0.00649461	4.06931e-20	1.51825e-14	3	11611863	VGLL4	Body-shore
cg15733114	female	0.182522	0.0181968	4.14908e-20	1.54801e-14	12	14996515	ART4	TSS200-opensea
cg20638582	female	0.132349	0.0131952	4.15805e-20	1.55136e-14	6	32151457	AGER	Body-opensea
cg09164726	female	0.236617	0.0236019	4.30525e-20	1.60628e-14	16	86121040		IGR-opensea
cg20078624	female	0.13778	0.0137499	4.46059e-20	1.66424e-14	15	22922301	CYFIP1	5'UTR-opensea
cg27374758	female	0.117081	0.0116872	4.54173e-20	1.69451e-14	3	121675259		IGR-opensea
cg06796709	female	0.162146	0.0162047	4.9439e-20	1.84456e-14	16	84645176	COTL1	Body-opensea
cg26553736	female	0.0793032	0.00792872	5.09251e-20	1.90001e-14	15	49491609	GALK2	Body-opensea
cg04158698	female	0.143357	0.0143341	5.12515e-20	1.91218e-14	1	201523041		IGR-opensea
cg24933605	female	-0.114654	0.0114702	5.32439e-20	1.98652e-14	2	216177085	ATIC	Body-island
cg26791464	female	0.129612	0.0129674	5.34924e-20	1.99579e-14	1	40769744	COL9A2	Body-island
cg01378515	female	0.175495	0.0175591	5.37467e-20	2.00528e-14	3	124773106	HEG1	Body-shore
cg04947052	female	0.178774	0.017899	5.63725e-20	2.10325e-14	2	128430937	LIMS2	Body-shore
cg25788793	female	-0.234328	0.0234734	5.85237e-20	2.18351e-14	4	10034580	SLC2A9	5'UTR-opensea
cg24892139	female	-0.270056	0.0270603	5.9759e-20	2.2296e-14	5	35618383	SPEF2	Body-shore
cg24784129	female	0.16449	0.0164862	6.07831e-20	2.26781e-14	15	57215558	TCF12	Body-shelf
cg11455040	female	-0.0696612	0.00698204	6.08973e-20	2.27207e-14	1	205649941	SLC45A3	TSS1500-shore
cg11872373	female	0.0877678	0.00879954	6.22506e-20	2.32256e-14	7	151833893	MLL3	3'UTR-opensea
cg11145643	female	0.0735644	0.00737569	6.23571e-20	2.32653e-14	14	100839818	WARS	5'UTR-shelf
cg11202871	female	0.128644	0.012902	6.37337e-20	2.37789e-14	7	134851177	C7orf49	Body-shelf
cg14792548	female	0.117894	0.0118261	6.46156e-20	2.4108e-14	17	1970514	SMG6	Body-opensea
cg19857461	female	0.226585	0.0227355	6.59534e-20	2.46071e-14	17	78703048	RPTOR	Body-shore
cg10635645	female	0.075534	0.00758005	6.65574e-20	2.48324e-14	12	12938397	APOLD1	Body-shore
cg09029902	female	-0.275126	0.0276283	6.98575e-20	2.60637e-14	20	52199594	ZNF217	5'UTR-shore
cg03946762	female	-0.31837	0.0319825	7.1703e-20	2.67523e-14	12	54785043	ZNF385A	5'UTR-island
cg27427514	female	-0.262796	0.0264151	7.47518e-20	2.78897e-14	3	193922037		IGR-island
cg19400926	female	-0.188324	0.0189313	7.52669e-20	2.80819e-14	6	28889996	TRIM27	Body-shore
cg18986651	female	0.207287	0.0208406	7.60425e-20	2.83713e-14	3	145860909	PLOD2	Body-opensea
cg00201257	female	0.0699108	0.00703166	7.82775e-20	2.92052e-14	12	57390405	GPR182	3'UTR-opensea
cg10047173	female	0.154353	0.0155254	7.84535e-20	2.92708e-14	12	14996587	ART4	TSS200-opensea
cg01515508	female	0.147481	0.0148358	7.90549e-20	2.94952e-14	1	10728270	CASZ1	Body-shelf
cg17331950	female	0.119469	0.0120181	7.91633e-20	2.95357e-14	1	181075666		IGR-shore
cg19477978	female	0.0510715	0.00514153	8.35992e-20	3.11907e-14	17	16998439	MPRIP	Body-opensea
cg24989534	female	-0.0348694	0.00351129	8.51103e-20	3.17545e-14	2	216878510	MREG	TSS200-shore
cg02856338	female	0.163474	0.0164619	8.52488e-20	3.18062e-14	8	101822108		IGR-opensea
cg16726435	female	0.0819688	0.00825701	8.72657e-20	3.25586e-14	2	219128715		IGR-opensea
cg14380230	female	0.179555	0.0180966	9.05561e-20	3.37863e-14	1	3115309	PRDM16	Body-shelf
cg11247674	female	-0.121079	0.0122043	9.1234e-20	3.40392e-14	1	55267266	TTC22	TSS1500-shore
cg05324273	female	0.117714	0.0118751	9.68453e-20	3.61328e-14	10	60086738		IGR-opensea
cg02697519	female	0.0727626	0.00734077	9.72271e-20	3.62752e-14	1	10769910	CASZ1	5'UTR-opensea
cg21681212	female	0.14476	0.0146051	9.76115e-20	3.64187e-14	7	55260913	EGFR	Body-opensea
cg06918645	female	0.0921851	0.0093008	9.76446e-20	3.6431e-14	17	61518543	CYB561	TSS1500-shelf
cg04276626	female	-0.294692	0.0297502	1.0191e-19	3.80226e-14	17	57918500	MIR21	TSS200-opensea
cg10078009	female	0.167515	0.016914	1.03119e-19	3.84735e-14	7	4746964	FOXK1	Body-opensea
cg12616097	female	0.136116	0.013744	1.03289e-19	3.85369e-14	1	17051629		IGR-island
cg20767356	female	0.0556928	0.00562421	1.04313e-19	3.89192e-14	1	150693100	HORMAD1	5'UTR-opensea
cg22243000	female	0.0784702	0.00792791	1.07623e-19	4.01541e-14	17	37813369	STARD3	Body-opensea
cg04383383	female	0.131873	0.0133263	1.09359e-19	4.08015e-14	19	310430	MIER2	Body-island
cg11303839	female	-0.422141	0.0426693	1.11276e-19	4.15169e-14	7	75405967	CCL26	5'UTR-opensea
cg25630588	female	0.166295	0.01681	1.11817e-19	4.17188e-14	3	50357322	HYAL2	Body-shore
cg25021051	female	-0.199388	0.0201578	1.12853e-19	4.21051e-14	12	53448178	TENC1	Body-island
cg17250863	female	0.161573	0.0163462	1.18636e-19	4.4263e-14	20	33451272	GGT7	Body-island
cg14275842	female	-0.184088	0.0186246	1.18843e-19	4.43401e-14	17	4802813	CHRNE	Body-island
cg07155724	female	0.157985	0.0159917	1.23175e-19	4.59563e-14	14	105165730	INF2	5'UTR-shore
cg11448366	female	0.133025	0.0134654	1.23231e-19	4.59772e-14	15	101601096	LRRK1	Body-opensea
cg07343511	female	0.121063	0.0122564	1.24584e-19	4.6482e-14	1	9078477	SLC2A7	Body-opensea
cg03538383	female	0.183695	0.0186038	1.27729e-19	4.76555e-14	12	110399167	GIT2	Body-opensea
cg27269561	female	-0.102406	0.0103713	1.27787e-19	4.76771e-14	16	3072713	HCFC1R1	3'UTR-shore
cg00351537	female	0.146429	0.014831	1.28585e-19	4.79747e-14	19	7580275	ZNF358	TSS1500-shore
cg15183991	female	-0.233004	0.0236	1.2867e-19	4.80067e-14	8	145047566	PLEC1	Body-island
cg00224911	female	-0.0534643	0.00541607	1.3019e-19	4.85737e-14	4	74486142	RASSF6	Body-island
cg05651778	female	-0.116716	0.0118509	1.53173e-19	5.71484e-14	17	60729731	MRC2	Body-island
cg11744021	female	0.160016	0.0162474	1.53197e-19	5.71575e-14	6	151342906	MTHFD1L	Body-opensea
cg27559724	female	-0.0567254	0.00576924	1.72173e-19	6.42374e-14	3	186524679	RFC4	TSS200-island
cg13747967	female	-0.251587	0.0255958	1.76116e-19	6.57087e-14	16	57392618	CCL22	TSS200-opensea
cg08054010	female	0.138048	0.0140558	1.86179e-19	6.94629e-14	3	194877369	C3orf21	Body-opensea
cg04846720	female	0.183101	0.0186504	1.9147e-19	7.1437e-14	14	103295640	TRAF3	5'UTR-opensea
cg12251895	female	0.221842	0.0226018	1.94653e-19	7.26247e-14	2	207980866	KLF7	Body-opensea
cg20524128	female	-0.106124	0.0108135	1.9637e-19	7.32653e-14	17	77965982	TBC1D16	Body-island
cg06429138	female	0.130107	0.0132623	2.0168e-19	7.52462e-14	11	72860376		IGR-opensea
cg02422997	female	0.0636063	0.00649037	2.16879e-19	8.09171e-14	15	100277091		IGR-shelf
cg09017434	female	0.263033	0.0268548	2.25519e-19	8.41406e-14	5	16179660	2024-03-11	1stExon-island
cg15387123	female	-0.18463	0.0188577	2.31919e-19	8.65284e-14	9	139891058	CLIC3	TSS200-shore
cg13540312	female	0.0999092	0.0102051	2.32987e-19	8.69271e-14	17	80560085	FOXK2	3'UTR-shore
cg14874541	female	-0.137752	0.0140719	2.34562e-19	8.75148e-14	3	124304033	KALRN	Body-island
cg13450944	female	0.115534	0.0118068	2.40915e-19	8.98851e-14	3	66533056	LRIG1	Body-opensea
cg21714809	female	-0.0532603	0.00544312	2.4179e-19	9.02113e-14	11	72463184	ARAP1	5'UTR-island
cg00886954	female	-0.208336	0.0212923	2.42387e-19	9.04342e-14	8	145047713	PLEC1	Body-island
cg27180868	female	-0.162252	0.0165842	2.44227e-19	9.11206e-14	1	161008750	TSTD1	5'UTR-island
cg12064195	female	0.107011	0.0109412	2.49295e-19	9.30113e-14	22	47367756	TBC1D22A	Body-shelf
cg22513691	female	0.0990271	0.0101262	2.51585e-19	9.38657e-14	1	10738664	CASZ1	Body-opensea
cg05168229	female	-0.167968	0.0171759	2.51649e-19	9.38896e-14	13	45390049		IGR-opensea
cg16634108	female	-0.127696	0.0130606	2.55448e-19	9.53073e-14	13	25254440	ATP12A	TSS1500-island
cg00827893	female	0.271544	0.0277734	2.55593e-19	9.53613e-14	13	33162946	PDS5B	5'UTR-shore
cg16108230	female	0.184626	0.0188844	2.5642e-19	9.56696e-14	6	117584815		IGR-island
cg23662097	female	-0.28384	0.0290363	2.58829e-19	9.65688e-14	3	4873008	ITPR1	Body-opensea
cg15450445	female	0.144014	0.0147373	2.65018e-19	9.88776e-14	3	14365151		IGR-opensea
cg07340145	female	0.115064	0.0117761	2.67115e-19	9.966e-14	16	86220038		IGR-opensea
cg24592892	female	0.102716	0.0105135	2.69196e-19	1.00437e-13	12	79916348		IGR-opensea
cg19618897	female	-0.125854	0.0128977	2.93189e-19	1.09388e-13	17	65242892		IGR-shore
cg04864807	female	0.355787	0.0364807	3.04146e-19	1.13476e-13	2	121412139		IGR-island
cg12486558	female	0.128715	0.013199	3.0608e-19	1.14198e-13	6	134350854	SLC2A12	Body-opensea
cg22508831	female	-0.0706946	0.00724939	3.06166e-19	1.1423e-13	22	40573204	TNRC6B	Body-opensea
cg24224501	female	0.154451	0.0158401	3.08666e-19	1.15163e-13	7	102566723	LRRC17	5'UTR-opensea
cg19466563	female	0.210339	0.0215803	3.17296e-19	1.18382e-13	4	88450506	SPARCL1	1stExon-opensea
cg01367005	female	-0.148652	0.0152583	3.27481e-19	1.22183e-13	17	38518966	GJD3	1stExon-island
cg20298668	female	0.1552	0.0159337	3.32116e-19	1.23912e-13	2	240230663	HDAC4	Body-opensea
cg25763542	female	0.177929	0.0182688	3.34246e-19	1.24707e-13	19	310512	MIER2	Body-island
cg18565103	female	-0.0284109	0.00291716	3.34861e-19	1.24936e-13	1	26633265	UBXN11	5'UTR-island
cg07489048	female	0.235851	0.0242176	3.35829e-19	1.25297e-13	14	29236898	FOXG1	1stExon-island
cg01146614	female	-0.247319	0.025396	3.36701e-19	1.25623e-13	6	159235211	EZR	Body-shelf
cg12819548	female	0.112559	0.011559	3.38407e-19	1.26259e-13	11	120256570	ARHGEF12	Body-opensea
cg11866303	female	-0.113423	0.0116491	3.41032e-19	1.27238e-13	19	40732691	CNTD2	TSS200-shore
cg25585523	female	-0.0297539	0.00305639	3.45136e-19	1.2877e-13	3	186524693	RFC4	TSS1500-island
cg00996377	female	0.144594	0.0148536	3.46129e-19	1.2914e-13	16	89689757	DPEP1	5'UTR-opensea
cg11385906	female	0.175765	0.0180676	3.62212e-19	1.35141e-13	8	28745680	INTS9	Body-shelf
cg02828785	female	0.115853	0.0119119	3.68309e-19	1.37415e-13	12	12846546	GPR19	5'UTR-shelf
cg23508701	female	0.102162	0.0105054	3.71352e-19	1.38551e-13	12	76331877		IGR-opensea
cg26541233	female	0.231655	0.0238416	3.94011e-19	1.47005e-13	4	184941395		IGR-opensea
cg07136054	female	-0.0696706	0.00717086	3.95725e-19	1.47644e-13	4	74486177	RASSF6	1stExon-island
cg14078335	female	0.179502	0.0184782	4.00064e-19	1.49263e-13	11	71760291	NUMA1	5'UTR-opensea
cg12032648	female	0.211943	0.0218515	4.45233e-19	1.66116e-13	2	166676897		IGR-opensea
cg00733786	female	-0.205194	0.0211751	4.74245e-19	1.7694e-13	14	54795898		IGR-opensea
cg16768018	female	0.251541	0.0259645	4.82703e-19	1.80096e-13	3	147108843	ZIC4	Body-island
cg12408295	female	-0.106067	0.0109629	5.2868e-19	1.9725e-13	20	42286743		IGR-shore
cg07274716	female	0.196186	0.0202839	5.40467e-19	2.01647e-13	5	134363973	PITX1	3'UTR-island
cg02507181	female	0.200046	0.0206897	5.52446e-19	2.06117e-13	12	10251536	CLEC1A	5'UTR-opensea
cg20600338	female	-0.0323769	0.0033486	5.52854e-19	2.06269e-13	14	71786811		IGR-shore
cg11190987	female	0.121465	0.0125635	5.55465e-19	2.07243e-13	5	64334489		IGR-shelf
cg05342240	female	0.127589	0.0131985	5.60021e-19	2.08943e-13	16	9246537		IGR-opensea
cg03964958	female	0.215664	0.022314	5.6791e-19	2.11886e-13	2	176964720	HOXD12	1stExon-island
cg25742464	female	-0.132783	0.0137492	5.98877e-19	2.2344e-13	1	201978971	ELF3	TSS1500-opensea
cg00480077	female	0.149711	0.0155021	5.98957e-19	2.2347e-13	19	7827894	CLEC4M	TSS200-opensea
cg06381455	female	0.123232	0.0127619	6.04239e-19	2.2544e-13	17	73472178	KIAA0195	Body-opensea
cg19894382	female	0.127796	0.0132386	6.17297e-19	2.30312e-13	10	60086891		IGR-opensea
cg26361553	female	0.1775	0.0183984	6.42693e-19	2.39788e-13	11	2871528		IGR-island
cg23167235	female	0.0616651	0.00639273	6.49335e-19	2.42266e-13	17	70532667		IGR-shelf
cg14317046	female	0.121568	0.0126032	6.50678e-19	2.42767e-13	19	18234076	MAST3	Body-shore
cg16227072	female	0.0793464	0.00822663	6.54241e-19	2.44096e-13	11	77320503	AQP11	3'UTR-opensea
cg09975715	female	0.0946904	0.00982185	6.74409e-19	2.51621e-13	17	8379050	MYH10	3'UTR-shore
cg26218269	female	0.0695711	0.00721727	6.80379e-19	2.53848e-13	4	151503227	LRBA	Body-shore
cg10541534	female	0.0513074	0.00532828	7.31835e-19	2.73046e-13	4	140429995	SETD7	3'UTR-opensea
cg02883503	female	0.103576	0.0107568	7.33726e-19	2.73752e-13	16	75423900	CFDP1	Body-opensea
cg08701183	female	0.207562	0.0215563	7.33952e-19	2.73836e-13	7	21209781		IGR-opensea
cg17297328	female	-0.135635	0.0140971	7.73352e-19	2.88536e-13	1	108743728	SLC25A24	TSS1500-shore
cg03740025	female	0.111129	0.0115574	8.0706e-19	3.01113e-13	7	127340829	SND1	Body-opensea
cg17159699	female	0.176456	0.0183567	8.23484e-19	3.0724e-13	8	53081140	ST18	Body-opensea
cg09502809	female	0.164227	0.0170852	8.25631e-19	3.08041e-13	1	32248172		IGR-opensea
cg13787933	female	0.0865244	0.00900421	8.42951e-19	3.14503e-13	3	141151009	ZBTB38	5'UTR-opensea
cg00785482	female	0.133816	0.0139429	9.17039e-19	3.42145e-13	1	208058986		IGR-opensea
cg06946797	female	-0.193067	0.0201292	9.56936e-19	3.57031e-13	16	11422409		IGR-opensea
cg15665400	female	-0.226578	0.0236245	9.6087e-19	3.58499e-13	2	133428652	LYPD1	TSS200-island
cg05501996	female	0.257226	0.0268235	9.69492e-19	3.61716e-13	5	50673730		IGR-opensea
cg10502231	female	0.183441	0.0191328	9.81757e-19	3.66291e-13	1	224363449		IGR-opensea
cg06002066	female	0.085814	0.00895173	9.92216e-19	3.70194e-13	2	173337636	ITGA6	Body-opensea
cg14663607	female	0.105463	0.0110051	1.01482e-18	3.78628e-13	2	219754816	WNT10A	Body-shelf
cg20614671	female	0.159902	0.0166869	1.01919e-18	3.80256e-13	7	2321431	SNX8	Body-shelf
cg22270027	female	0.184288	0.0192385	1.04403e-18	3.89524e-13	4	81128234		IGR-island
cg10432422	female	0.187548	0.0195821	1.05575e-18	3.93898e-13	1	17475819		IGR-island
cg07355514	female	0.231698	0.0241938	1.06157e-18	3.96068e-13	16	23420385	COG7	Body-opensea
cg08313880	female	-0.129146	0.013494	1.10897e-18	4.13754e-13	17	4643401	CXCL16	TSS200-island
cg22244192	female	0.200447	0.0209476	1.12145e-18	4.18412e-13	6	33943837		IGR-island
cg10449665	female	0.204485	0.0213725	1.13185e-18	4.22293e-13	16	86228628		IGR-opensea
cg20274267	female	0.175288	0.0183251	1.14977e-18	4.28979e-13	1	12164477	TNFRSF8	Body-opensea
cg08037727	female	0.138329	0.01447	1.19731e-18	4.46716e-13	3	194877199	C3orf21	Body-opensea
cg11823159	female	0.148687	0.0155547	1.20397e-18	4.49198e-13	2	128611859	POLR2D	Body-shelf
cg01942790	female	0.135858	0.0142174	1.2317e-18	4.59545e-13	4	1211419	CTBP1	Body-shore
cg13187820	female	0.0824642	0.00863036	1.23696e-18	4.61507e-13	13	98960562	FARP1	Body-opensea
cg23582919	female	-0.0441607	0.00462296	1.26039e-18	4.70249e-13	16	23568380	UBFD1	TSS1500-shore
cg14308254	female	0.0939107	0.00983143	1.26382e-18	4.71529e-13	8	124219699	FAM83A	Body-island
cg11624060	female	-0.145191	0.0152025	1.27812e-18	4.76864e-13	5	1316038		IGR-opensea
cg13203973	female	0.0578922	0.00606337	1.30218e-18	4.85842e-13	8	675274	ERICH1	Body-opensea
cg15958034	female	0.144454	0.0151307	1.30925e-18	4.88479e-13	13	97889396	MBNL2	5'UTR-opensea
cg08478871	female	-0.0960345	0.0100605	1.32239e-18	4.9338e-13	20	30606493	C20orf160	Body-island
cg00897799	female	0.114053	0.0119499	1.33532e-18	4.98207e-13	13	47367897	ESD	5'UTR-shelf
cg24585453	female	-0.154627	0.0162012	1.33654e-18	4.9866e-13	1	64058672	PGM1	TSS1500-shore
cg15495091	female	0.130156	0.0136374	1.33768e-18	4.99087e-13	13	113491819	ATP11A	Body-shore
cg10792923	female	-0.0502856	0.0052701	1.36021e-18	5.07493e-13	4	103789516	UBE2D3	Body-shore
cg06766541	female	0.155945	0.0163453	1.36979e-18	5.11066e-13	7	128556540		IGR-island
cg22024572	female	0.0764977	0.00801811	1.37052e-18	5.11339e-13	22	38866743	KDELR3	Body-shelf
cg25384043	female	0.128226	0.0134428	1.38978e-18	5.18526e-13	15	81295608	MESDC1	1stExon-island
cg03721976	female	-0.0223356	0.00234405	1.49128e-18	5.56395e-13	17	36859825		IGR-island
cg22101249	female	0.132736	0.0139308	1.49505e-18	5.57799e-13	6	32131615	EGFL8	TSS1500-shelf
cg18504632	female	0.144037	0.0151172	1.49748e-18	5.58706e-13	3	71732622	EIF4E3	3'UTR-opensea
cg02356223	female	0.129037	0.0135436	1.50322e-18	5.6085e-13	5	336337	AHRR	Body-opensea
cg04622024	female	0.226655	0.02379	1.5053e-18	5.61624e-13	1	38201001	EPHA10	Body-island
cg11014794	female	-0.22105	0.0232095	1.53977e-18	5.74486e-13	10	93999688	CPEB3	Body-island
cg13521620	female	0.208258	0.0218673	1.54404e-18	5.76077e-13	17	57410687	YPEL2	5'UTR-shore
cg24474037	female	0.118408	0.0124346	1.55815e-18	5.81344e-13	8	145865124		IGR-opensea
cg17680767	female	-0.297404	0.0312437	1.59805e-18	5.96228e-13	5	73623208		IGR-opensea
cg16374457	female	0.124717	0.0131038	1.61185e-18	6.0138e-13	17	57059840	PPM1E	3'UTR-opensea
cg24496614	female	-0.162109	0.0170388	1.65205e-18	6.16378e-13	11	61735970	FTH1	TSS1500-shore
cg08152445	female	0.0576416	0.0060597	1.67393e-18	6.2454e-13	19	42734313		IGR-shelf
cg15626828	female	-0.262507	0.0276044	1.70617e-18	6.3657e-13	1	198651141	PTPRC	Body-opensea
cg19321018	female	-0.153821	0.0161775	1.72125e-18	6.42194e-13	12	15942969	EPS8	TSS1500-shore
cg03030317	female	-0.141501	0.0148827	1.72837e-18	6.44853e-13	6	31164924	HCG27	TSS1500-shore
cg26521404	female	0.264071	0.0277792	1.74904e-18	6.52565e-13	7	27204981	HOXA9	1stExon-island
cg11316296	female	0.137672	0.0144882	1.79515e-18	6.69766e-13	3	55123709		IGR-opensea
cg14794735	female	0.0962641	0.0101306	1.79566e-18	6.69957e-13	7	129415968	MIR183	TSS1500-shelf
cg07450633	female	0.188298	0.0198207	1.82495e-18	6.80887e-13	5	172175321		IGR-shore
cg24052338	female	0.0845056	0.0088958	1.83183e-18	6.83452e-13	19	58879059	ZNF837	3'UTR-island
cg04359418	female	0.157621	0.0165977	1.87016e-18	6.97752e-13	10	76573396		IGR-island
cg12531611	female	0.119995	0.012637	1.88446e-18	7.03088e-13	6	11212619	NEDD9	Body-opensea
cg08653904	female	0.0506317	0.00533338	1.91284e-18	7.13676e-13	1	8497643	RERE	Body-opensea
cg04645070	female	-0.133181	0.0140311	1.93326e-18	7.21294e-13	11	34393106		IGR-opensea
cg06695286	female	0.114228	0.0120453	2.05537e-18	7.66855e-13	12	42880445	PRICKLE1	5'UTR-shelf
cg19921377	female	0.153897	0.0162319	2.08486e-18	7.77858e-13	19	7580209	ZNF358	TSS1500-shore
cg26034341	female	0.216081	0.0227926	2.09671e-18	7.8228e-13	17	477314	VPS53	Body-opensea
cg03598112	female	-0.292959	0.030902	2.09765e-18	7.82631e-13	17	28691021		IGR-opensea
cg22117968	female	0.164258	0.0173265	2.09946e-18	7.83305e-13	21	46768124		IGR-shelf
cg24152098	female	0.111102	0.0117254	2.1716e-18	8.1022e-13	13	113707579	MCF2L	Body-shore
cg26940479	female	0.281579	0.0297212	2.19216e-18	8.17889e-13	16	85201840		IGR-shore
cg13771753	female	-0.0971415	0.0102554	2.22036e-18	8.28414e-13	6	32016070	TNXB	Body-opensea
cg00446697	female	0.118436	0.0125094	2.29111e-18	8.54809e-13	11	1542313	HCCA2	Body-opensea
cg22545356	female	0.126784	0.0133933	2.31572e-18	8.6399e-13	10	88716659	MMRN2	Body-opensea
cg11687085	female	-0.14542	0.0153689	2.3865e-18	8.90398e-13	18	77724447	HSBP1L1	TSS200-island
cg19675142	female	0.158306	0.0167312	2.39001e-18	8.91709e-13	1	116107015		IGR-opensea
cg07085895	female	-0.0414535	0.00438186	2.41501e-18	9.01034e-13	11	19262124	E2F8	1stExon-island
cg07000334	female	-0.160567	0.0169734	2.42106e-18	9.03292e-13	12	54785286	ZNF385A	TSS1500-shore
cg24593363	female	0.16219	0.0171599	2.5643e-18	9.56735e-13	1	2482848	LOC115110	Body-opensea
cg12885287	female	0.114588	0.0121273	2.61846e-18	9.76943e-13	2	240259002	HDAC4	Body-opensea
cg09947611	female	0.155432	0.0164548	2.67008e-18	9.96202e-13	11	1542360	HCCA2	Body-opensea
cg01834614	female	-0.117602	0.0124504	2.67605e-18	9.9843e-13	1	147143012	ACP6	TSS1500-shore
cg02712949	female	0.0888087	0.00940293	2.69255e-18	1.00458e-12	8	87570714	CPNE3	3'UTR-opensea
cg22531371	female	-0.164703	0.0174469	2.78042e-18	1.03737e-12	1	155162756	MUC1	TSS200-shore
cg01266985	female	0.138795	0.0147042	2.80061e-18	1.0449e-12	5	1092066	SLC12A7	Body-shore
cg12190994	female	0.161767	0.017142	2.84677e-18	1.06212e-12	7	4305061	SDK1	Body-island
cg15358549	female	0.221399	0.0234697	2.91748e-18	1.0885e-12	5	127872074	FBN2	Body-island
cg02587606	female	0.195964	0.0207809	2.98765e-18	1.11469e-12	10	77352231		IGR-opensea
cg00754604	female	0.243599	0.0258355	3.01219e-18	1.12384e-12	2	161230046	RBMS1	Body-opensea
cg01709975	female	0.0729436	0.00773643	3.01709e-18	1.12567e-12	4	25847472	SEL1L3	Body-opensea
cg15946904	female	0.0963323	0.0102181	3.03768e-18	1.13335e-12	17	957248	ABR	Body-opensea
cg05982160	female	0.131535	0.013954	3.06513e-18	1.14359e-12	3	128294970	C3orf27	TSS200-opensea
cg26942532	female	-0.037053	0.00393129	3.09125e-18	1.15334e-12	7	75678159	MDH2	Body-shore
cg24165439	female	0.0398022	0.00422319	3.10101e-18	1.15698e-12	10	45967484	2024-03-08	Body-opensea
cg19880542	female	0.107279	0.011386	3.15896e-18	1.1786e-12	3	11678156	VGLL4	Body-opensea
cg06993413	female	-0.0589849	0.00626096	3.181e-18	1.18682e-12	15	65810204	DPP8	TSS200-shore
cg02377544	female	0.13159	0.0139694	3.2085e-18	1.19708e-12	15	37388359	MEIS2	Body-shore
cg23193759	female	-0.181183	0.0192375	3.24467e-18	1.21058e-12	10	71389896	C10orf35	TSS200-island
cg05171197	female	0.167603	0.0177986	3.28204e-18	1.22452e-12	2	240230850	HDAC4	Body-opensea
cg01243072	female	0.0936983	0.00995465	3.37779e-18	1.26025e-12	2	43398171		IGR-island
cg03751906	female	-0.103368	0.0109855	3.45096e-18	1.28754e-12	12	129307800	SLC15A4	Body-shore
cg09197075	female	-0.259224	0.0275499	3.4566e-18	1.28965e-12	16	11769691	SNN	5'UTR-opensea
cg12598025	female	0.108291	0.0115102	3.4791e-18	1.29805e-12	5	172091816	NEURL1B	Body-opensea
cg08006309	female	0.139866	0.0148688	3.51883e-18	1.31287e-12	16	1587810	IFT140	Body-island
cg07256668	female	0.0790907	0.00840941	3.55991e-18	1.3282e-12	11	64398137	NRXN2	Body-shore
cg21303763	female	-0.206372	0.021945	3.5841e-18	1.33722e-12	12	3309708	TSPAN9	5'UTR-island
cg11586448	female	-0.273133	0.0290443	3.58518e-18	1.33762e-12	12	123383399		IGR-shelf
cg00430895	female	-0.181752	0.0193325	3.65323e-18	1.36301e-12	18	13136340		IGR-shore
cg07506510	female	-0.13061	0.0138985	3.75636e-18	1.40149e-12	11	2951911	PHLDA2	TSS1500-shore
cg27435660	female	0.101278	0.010782	3.86719e-18	1.44284e-12	10	5935953	FBXO18	Body-shelf
cg24082440	female	0.109849	0.0116947	3.87188e-18	1.44459e-12	21	33672186	MRAP	Body-shore
cg06648780	female	0.148775	0.0158434	3.94647e-18	1.47242e-12	3	105133817	ALCAM	Body-opensea
cg05021643	female	0.173781	0.0185066	3.95002e-18	1.47374e-12	2	177029608	HOXD3	5'UTR-island
cg08619385	female	0.0993216	0.0105778	3.96701e-18	1.48008e-12	4	144438035	SMARCA5	Body-shelf
cg18270760	female	0.0781124	0.00832332	4.10362e-18	1.53105e-12	10	43691112	RASGEF1A	3'UTR-opensea
cg16258229	female	0.0978351	0.0104256	4.12327e-18	1.53838e-12	1	5956985	NPHP4	Body-opensea
cg16720678	female	0.111969	0.011932	4.12677e-18	1.53969e-12	17	210096		IGR-shelf
cg10588310	female	0.198732	0.0211908	4.29689e-18	1.60316e-12	1	3332000	PRDM16	Body-island
cg08173709	female	0.0897281	0.00957007	4.36664e-18	1.62918e-12	3	71103443	FOXP1	Body-opensea
cg15050015	female	0.162081	0.017296	4.51919e-18	1.6861e-12	5	141183906		IGR-opensea
cg12661262	female	0.0667466	0.00712381	4.56666e-18	1.70381e-12	6	21691612	FLJ22536	Body-opensea
cg03851835	female	-0.342154	0.0365413	4.76412e-18	1.77749e-12	11	107711742	SLC35F2	Body-opensea
cg04738965	female	0.217448	0.0232252	4.7935e-18	1.78845e-12	3	147127662	ZIC1	1stExon-island
cg10520594	female	-0.0577985	0.00617548	4.9033e-18	1.82941e-12	17	73127197	NT5C	Body-island
cg10549973	female	-0.182674	0.0195306	5.1189e-18	1.90985e-12	14	58863097	TOMM20L	Body-island
cg13224075	female	0.0667005	0.00713281	5.19065e-18	1.93662e-12	13	30107081	SLC7A1	Body-opensea
cg09361958	female	0.166877	0.0178494	5.26509e-18	1.96439e-12	3	128947790		IGR-opensea
cg02637537	female	0.23671	0.0253215	5.30258e-18	1.97838e-12	8	22447181	PDLIM2	Body-opensea
cg24020222	female	0.168356	0.0180161	5.43147e-18	2.02647e-12	5	64308317	SDCCAG10	Body-opensea
cg04786142	female	-0.230338	0.0246514	5.46756e-18	2.03994e-12	1	234908381		IGR-opensea
cg20080282	female	0.0695132	0.00744045	5.51319e-18	2.05696e-12	11	107896210	CUL5	Body-opensea
cg25270670	female	-0.0776381	0.00831478	5.7193e-18	2.13386e-12	11	61735789	FTH1	TSS1500-island
cg17694130	female	-0.135421	0.0145035	5.72867e-18	2.13736e-12	4	14858290		IGR-opensea
cg11001739	female	0.075355	0.00807777	6.07707e-18	2.26734e-12	7	1983918	MAD1L1	Body-opensea
cg19250790	female	-0.0914028	0.00981118	6.6314e-18	2.47416e-12	19	2614086	GNG7	5'UTR-island
cg16448636	female	0.177879	0.0191015	6.81377e-18	2.5422e-12	7	21209509		IGR-opensea
cg03783110	female	0.193179	0.0207453	6.83232e-18	2.54912e-12	17	1463739	PITPNA	Body-shore
cg26614624	female	0.079919	0.00858428	6.92782e-18	2.58476e-12	16	66610375	CMTM1	Body-shelf
cg21449597	female	-0.234214	0.0251587	6.95189e-18	2.59374e-12	4	154036828		IGR-opensea
cg16284437	female	0.152736	0.0164069	6.96238e-18	2.59765e-12	18	76751616	SALL3	Body-shore
cg13428086	female	0.204244	0.0219405	6.97302e-18	2.60162e-12	1	10743216	CASZ1	Body-opensea
cg16578387	female	0.115297	0.0123862	6.99757e-18	2.61078e-12	11	33744043	CD59	5'UTR-opensea
cg23060384	female	-0.0374129	0.00401993	7.0779e-18	2.64075e-12	3	194206773		IGR-shore
cg08513622	female	0.147609	0.0158607	7.09015e-18	2.64532e-12	7	1889785	MAD1L1	Body-shore
cg01340991	female	0.142215	0.0152822	7.12565e-18	2.65856e-12	6	33397233	SYNGAP1	Body-shore
cg04298224	female	0.143371	0.0154123	7.30252e-18	2.72456e-12	13	113707471	MCF2L	Body-shore
cg25905215	female	0.107206	0.0115251	7.32748e-18	2.73387e-12	4	103537858	NFKB1	3'UTR-opensea
cg13028471	female	-0.0726086	0.00780708	7.40721e-18	2.76362e-12	4	139163535	SLC7A11	TSS200-opensea
cg01492538	female	0.118399	0.0127339	7.53327e-18	2.81065e-12	7	2774543	GNA12	Body-island
cg04723343	female	0.139385	0.0149944	7.64702e-18	2.85309e-12	2	238647913	LRRFIP1	Body-shelf
cg27627381	female	-0.0952525	0.0102486	7.73475e-18	2.88582e-12	17	75452100	2024-09-09	Body-opensea
cg12273284	female	-0.254463	0.0273844	7.83759e-18	2.92419e-12	10	12490844	CAMK1D	Body-opensea
cg13449377	female	0.139633	0.0150315	7.99705e-18	2.98368e-12	7	96631089	DLX6AS	Body-shore
cg24501177	female	0.122268	0.0131621	7.99821e-18	2.98412e-12	15	70726696		IGR-opensea
cg04705435	female	-0.0783069	0.00843325	8.21677e-18	3.06566e-12	11	17411270	KCNJ11	TSS1500-island
cg22969079	female	0.0914339	0.00985471	8.64594e-18	3.22578e-12	11	75046350	ARRB1	Body-opensea
cg25266281	female	0.130265	0.0140425	8.74812e-18	3.2639e-12	2	242904768		IGR-opensea
cg06213360	female	0.0999839	0.0107842	9.07012e-18	3.38404e-12	17	6462302		IGR-shelf
cg08285067	female	0.0885966	0.00955644	9.09837e-18	3.39459e-12	8	142184629	DENND3	Body-shore
cg21872908	female	0.132294	0.0142711	9.1495e-18	3.41366e-12	1	55271673	C1orf177	TSS200-island
cg09549949	female	0.0464472	0.00501632	9.86865e-18	3.68197e-12	2	240240119	HDAC4	Body-opensea
cg09628877	female	0.0621904	0.00671682	9.89043e-18	3.6901e-12	3	195613739	TNK2	Body-island
cg11430718	female	-0.137217	0.0148214	9.94915e-18	3.71201e-12	3	57113702	ARHGEF3	TSS1500-island
cg06736663	female	0.095367	0.0103014	9.97623e-18	3.72211e-12	2	219754761	WNT10A	Body-shelf
cg26025557	female	0.144573	0.0156199	1.01132e-17	3.77321e-12	3	42842344	HIGD1A	Body-shelf
cg04227922	female	0.212784	0.0230041	1.05368e-17	3.93125e-12	2	119615496		IGR-island
cg07388969	female	-0.259337	0.0280539	1.09533e-17	4.08664e-12	15	38509709		IGR-opensea
cg15034393	female	-0.183109	0.0198079	1.0955e-17	4.08727e-12	3	152856773		IGR-opensea
cg13096701	female	0.153977	0.0166565	1.0955e-17	4.08729e-12	4	160188727	RAPGEF2	TSS1500-opensea
cg06756164	female	0.225574	0.0244106	1.12161e-17	4.18469e-12	1	109490978	CLCC1	Body-opensea
cg07140497	female	0.166492	0.0180199	1.13335e-17	4.2285e-12	12	113550113	RASAL1	Body-island
cg09216236	female	-0.229983	0.0248979	1.15153e-17	4.29633e-12	1	65719627		IGR-shore
cg16489193	female	-0.0785231	0.00850153	1.15722e-17	4.31758e-12	6	33240059	VPS52	TSS1500-island
cg06458238	female	0.137781	0.0149315	1.23033e-17	4.59033e-12	17	73506140	CASKIN2	Body-opensea
cg17937101	female	-0.211386	0.0229085	1.23144e-17	4.59448e-12	8	1765066	MIR596	TSS1500-island
cg13521205	female	0.128737	0.0139619	1.29124e-17	4.81759e-12	9	130291154	FAM129B	Body-shore
cg22929099	female	0.076731	0.00832372	1.3115e-17	4.89319e-12	5	137593583	GFRA3	Body-island
cg25589001	female	0.11044	0.0119824	1.32495e-17	4.94338e-12	10	98605052	LCOR	5'UTR-opensea
cg26351001	female	-0.188745	0.0204852	1.35431e-17	5.05291e-12	4	184644413		IGR-island
cg15506609	female	0.208096	0.0225884	1.36575e-17	5.09559e-12	7	27206073	HOXA9	TSS1500-island
cg21199093	female	0.199158	0.0216265	1.39992e-17	5.22306e-12	1	35836009	ZMYM4	Body-opensea
cg07538946	female	-0.0414081	0.00449748	1.41974e-17	5.29702e-12	5	131705188	SLC22A5	TSS1500-island
cg07642822	female	0.133659	0.0145193	1.43312e-17	5.34693e-12	19	56608958	ZNF787	Body-island
cg10057614	female	0.0973595	0.0105788	1.4564e-17	5.43381e-12	16	56841060	NUP93	Body-opensea
cg02578087	female	-0.215131	0.0233821	1.48325e-17	5.53397e-12	3	8671361	C3orf32	Body-opensea
cg22800711	female	0.114705	0.012468	1.49041e-17	5.56069e-12	1	54110745	GLIS1	5'UTR-opensea
cg01884917	female	0.193203	0.0210064	1.51753e-17	5.66189e-12	17	1038155	ABR	Body-opensea
cg26149682	female	0.162826	0.0177064	1.53309e-17	5.71991e-12	6	10417663	TFAP2A	Body-island
cg11024506	female	0.118263	0.0128612	1.53918e-17	5.74266e-12	10	62668850	RHOBTB1	Body-opensea
cg14171343	female	0.0693245	0.00754017	1.55302e-17	5.79428e-12	9	114219932	KIAA0368	Body-opensea
cg25614364	female	0.309284	0.0336593	1.61197e-17	6.01423e-12	4	129747274	PHF17	5'UTR-opensea
cg01082057	female	0.0669988	0.00729303	1.63424e-17	6.09731e-12	7	750720	PRKAR1B	Body-shore
cg19730691	female	0.140742	0.0153213	1.64162e-17	6.12484e-12	1	119526437	TBX15	5'UTR-shore
cg02630233	female	0.169667	0.0184709	1.64622e-17	6.14201e-12	16	88482273		IGR-opensea
cg22220165	female	-0.0540498	0.00588606	1.68047e-17	6.2698e-12	17	18908242	SLC5A10	Body-island
cg10696787	female	-0.0839632	0.00914393	1.68355e-17	6.28128e-12	17	65242740	HELZ	TSS1500-shore
cg14737484	female	-0.372009	0.0405165	1.69213e-17	6.31331e-12	6	32054561	TNXB	Body-shore
cg24685134	female	-0.10541	0.0114817	1.70326e-17	6.35485e-12	1	55267152	TTC22	TSS1500-shore
cg19433091	female	-0.175473	0.0191165	1.72263e-17	6.42711e-12	15	43426498	TMEM62	Body-shore
cg05411594	female	0.198682	0.0216518	1.75738e-17	6.55673e-12	10	86056416		IGR-opensea
cg11671688	female	0.19787	0.0215655	1.76842e-17	6.59793e-12	6	110301075	GPR6	1stExon-island
cg14571813	female	-0.304549	0.0332131	1.84069e-17	6.86757e-12	3	129062831		IGR-island
cg03781262	female	0.0854493	0.00931924	1.84598e-17	6.8873e-12	19	58879871	ZNF837	Body-island
cg22657492	female	0.124419	0.0135702	1.8533e-17	6.91464e-12	5	137593488	GFRA3	Body-island
cg03224163	female	0.0818478	0.00893045	1.89922e-17	7.08594e-12	7	139420300	HIPK2	Body-shelf
cg17356718	female	0.134544	0.0146821	1.91543e-17	7.14644e-12	2	240230587	HDAC4	Body-opensea
cg01511232	female	0.184298	0.0201124	1.92071e-17	7.16613e-12	4	155661929		IGR-island
cg07319375	female	-0.115035	0.0125541	1.92394e-17	7.17818e-12	1	6169384	CHD5	Body-opensea
cg19375587	female	0.211294	0.0230608	1.93337e-17	7.21337e-12	11	2871478		IGR-island
cg13418839	female	0.0949873	0.0103739	2.01638e-17	7.52307e-12	17	37798877	STARD3	5'UTR-opensea
cg11172423	female	0.128416	0.0140295	2.06062e-17	7.68814e-12	1	43205623	CLDN19	1stExon-shore
cg14260889	female	0.165951	0.018134	2.08749e-17	7.7884e-12	10	17275599	VIM	Body-shelf
cg04955333	female	0.103281	0.0112867	2.09755e-17	7.82592e-12	7	2647414	IQCE	Body-shore
cg20967139	female	-0.210639	0.0230277	2.14923e-17	8.01875e-12	12	54785055	ZNF385A	5'UTR-island
cg06081750	female	0.110934	0.0121299	2.17467e-17	8.11364e-12	12	1018307	WNK1	3'UTR-opensea
cg08928753	female	0.235226	0.0257264	2.20683e-17	8.23363e-12	1	43770707	TIE1	Body-island
cg12847240	female	0.142395	0.015575	2.21962e-17	8.28135e-12	6	10382088		IGR-island
cg24375409	female	0.31628	0.0346026	2.25355e-17	8.40795e-12	1	38200920	EPHA10	Body-island
cg21273275	female	-0.236911	0.0259204	2.26026e-17	8.43299e-12	1	24648328	GRHL3	TSS1500-island
cg01771737	female	0.111646	0.0122157	2.26689e-17	8.4577e-12	2	240199147	HDAC4	Body-shelf
cg06804823	female	-0.143846	0.0157453	2.32539e-17	8.676e-12	6	31798635		IGR-shore
cg14398243	female	0.113087	0.0123807	2.35338e-17	8.78041e-12	2	46385031	PRKCE	Body-opensea
cg24110966	female	0.0937364	0.0102628	2.36032e-17	8.80632e-12	6	2968851	SERPINB6	5'UTR-shelf
cg07679219	female	0.0967913	0.0105975	2.36385e-17	8.81949e-12	12	77417738	E2F7	3'UTR-opensea
cg19578660	female	-0.1739	0.0190403	2.36654e-17	8.82951e-12	10	3511600		IGR-opensea
cg09423312	female	0.226989	0.0248556	2.38235e-17	8.8885e-12	7	1163549	C7orf50	Body-opensea
cg08214329	female	0.119015	0.0130328	2.3881e-17	8.90997e-12	16	1599072	IFT140	Body-island
cg24171239	female	0.0795966	0.00871755	2.41039e-17	8.99311e-12	11	108627073	DDX10	Body-opensea
cg16879247	female	-0.0447716	0.00490619	2.49687e-17	9.31578e-12	6	36561383	SFRS3	TSS1500-shore
cg14754787	female	0.269509	0.0295447	2.55718e-17	9.54078e-12	17	35299600	LHX1	Body-island
cg25195899	female	0.166293	0.0182335	2.59116e-17	9.66755e-12	17	25640203	WSB1	3'UTR-opensea
cg14615927	female	0.156125	0.0171242	2.64508e-17	9.86872e-12	2	240259213	HDAC4	Body-opensea
cg20016631	female	0.226673	0.0248625	2.64697e-17	9.87579e-12	4	38871320	FAM114A1	5'UTR-shore
cg25859045	female	-0.0312491	0.00342777	2.6589e-17	9.9203e-12	11	64809369	SAC3D1	Body-shore
cg11794215	female	0.146501	0.016071	2.6693e-17	9.9591e-12	17	35423816		IGR-opensea
cg09536315	female	0.144924	0.0158987	2.67752e-17	9.98976e-12	2	179729091	CCDC141	Body-opensea
cg20315995	female	0.0693772	0.00761135	2.68629e-17	1.00225e-11	12	7280971	RBP5	Body-opensea
cg11998307	female	0.10179	0.0111676	2.68937e-17	1.0034e-11	17	1549434	SCARF1	TSS1500-shelf
cg02397479	female	0.106023	0.0116337	2.71483e-17	1.0129e-11	13	99631309	DOCK9	Body-opensea
cg08007925	female	0.179072	0.0196517	2.73589e-17	1.02075e-11	1	3332160	PRDM16	Body-island
cg08542351	female	0.194552	0.0213519	2.74749e-17	1.02508e-11	10	77352376		IGR-opensea
cg21368094	female	0.098694	0.0108316	2.74764e-17	1.02514e-11	12	52452745	NR4A1	3'UTR-opensea
cg19772092	female	0.118347	0.0129918	2.792e-17	1.04169e-11	2	45177632		IGR-shore
cg21811284	female	-0.109224	0.0119925	2.82353e-17	1.05345e-11	17	75208450	SEC14L1	Body-shore
cg07967677	female	-0.195701	0.021492	2.863e-17	1.06818e-11	1	161008977	TSTD1	TSS1500-shore
cg16319535	female	0.0882139	0.00968845	2.87675e-17	1.07331e-11	5	153599583	GALNT10	Body-opensea
cg03689092	female	0.166899	0.0183328	2.90093e-17	1.08233e-11	2	128439345	LIMS2	1stExon-opensea
cg25743345	female	0.096632	0.0106145	2.90298e-17	1.0831e-11	17	73506230	CASKIN2	TSS1500-opensea
cg24023453	female	-0.0793497	0.00871642	2.90821e-17	1.08505e-11	6	31164952	HCG27	TSS1500-shore
cg10154122	female	-0.0673196	0.00739542	2.92035e-17	1.08958e-11	19	38754855	SPINT2	TSS1500-island
cg23718606	female	-0.0866778	0.00952228	2.92526e-17	1.09141e-11	6	27219812	PRSS16	Body-island
cg07904475	female	0.125086	0.0137434	2.94702e-17	1.09953e-11	4	151500931	LRBA	Body-island
cg13816466	female	0.169642	0.0186392	2.95126e-17	1.10111e-11	9	35909466	LOC158376	TSS200-opensea
cg02409722	female	0.0648916	0.00713185	3.00273e-17	1.12031e-11	4	140429978	SETD7	3'UTR-opensea
cg04620946	female	0.0786322	0.00864381	3.04283e-17	1.13527e-11	1	94144259	BCAR3	5'UTR-shelf
cg12041266	female	0.110034	0.012102	3.14254e-17	1.17248e-11	11	75050147	ARRB1	Body-opensea
cg04586622	female	0.130257	0.0143267	3.15016e-17	1.17532e-11	2	25135609	ADCY3	Body-opensea
cg12258785	female	-0.180758	0.0198942	3.2818e-17	1.22443e-11	3	24537407	THRB	TSS1500-island
cg21610839	female	0.122813	0.0135216	3.35551e-17	1.25193e-11	3	23861312	UBE2E1	Body-opensea
cg23974819	female	-0.1424	0.0156808	3.39275e-17	1.26583e-11	12	7055829	PTPN6	1stExon-shore
cg15174117	female	0.170136	0.0187384	3.43164e-17	1.28034e-11	15	68913662	CORO2B	Body-opensea
cg00632070	female	0.116892	0.0128746	3.43853e-17	1.28291e-11	13	31506324	C13orf26	TSS1500-opensea
cg19409133	female	-0.224972	0.0247884	3.52308e-17	1.31445e-11	1	28843744	SNHG3-RCC1	Body-shore
cg09145391	female	-0.0360034	0.00396845	3.60403e-17	1.34466e-11	17	7338890	TMEM102	5'UTR-shore
cg13622265	female	0.17478	0.0192657	3.61244e-17	1.34779e-11	9	124584474	TTLL11	3'UTR-opensea
cg23746497	female	0.275233	0.0303412	3.63259e-17	1.35531e-11	6	105388668		IGR-island
cg17390562	female	-0.0902945	0.00995731	3.7114e-17	1.38472e-11	6	159238463	EZR	Body-shore
cg21571658	female	-0.405426	0.0447161	3.7496e-17	1.39897e-11	15	70785399		IGR-opensea
cg03312532	female	0.118932	0.0131194	3.78391e-17	1.41177e-11	15	90166033	C15orf42	Body-opensea
cg08573038	female	0.122333	0.0135013	3.90344e-17	1.45637e-11	12	110399302	GIT2	Body-opensea
cg03635766	female	0.197537	0.021804	3.93591e-17	1.46848e-11	17	38607865	IGFBP4	Body-opensea
cg07283896	female	-0.251152	0.0277372	4.07241e-17	1.51941e-11	6	11855283		IGR-opensea
cg10333802	female	-0.0595464	0.00657666	4.08627e-17	1.52458e-11	14	71373888	PCNX	TSS1500-shore
cg21122466	female	0.0790177	0.00872782	4.10512e-17	1.53161e-11	6	99323548	FBXL4	Body-opensea
cg23878241	female	-0.164105	0.0181276	4.12606e-17	1.53942e-11	12	111019734	PPTC7	Body-shore
cg26055899	female	-0.213535	0.0235924	4.17727e-17	1.55853e-11	4	154462759	KIAA0922	Body-opensea
cg13283952	female	0.300232	0.0331767	4.22085e-17	1.57479e-11	2	121412005		IGR-island
cg00866814	female	-0.0883144	0.00976209	4.30393e-17	1.60579e-11	19	49017364	LMTK3	TSS1500-shore
cg17438030	female	0.192173	0.0212465	4.35691e-17	1.62556e-11	5	72526379		IGR-island
cg26530045	female	0.110293	0.012197	4.42551e-17	1.65115e-11	1	23487055	LUZP1	5'UTR-opensea
cg04035828	female	0.157782	0.0174524	4.4839e-17	1.67293e-11	16	12405425	SNX29	Body-opensea
cg01750157	female	-0.108701	0.0120257	4.53542e-17	1.69216e-11	17	72426840	GPRC5C	TSS1500-island
cg14084456	female	-0.0364542	0.00403402	4.61054e-17	1.72018e-11	1	204486034	MDM4	Body-shore
cg02995055	female	-0.0552367	0.00611531	4.74462e-17	1.77021e-11	13	42535448	KIAA0564	TSS1500-island
cg05202804	female	-0.181732	0.0201202	4.75175e-17	1.77287e-11	19	11484815	C19orf39	TSS1500-shore
cg19221841	female	-0.0435786	0.00482505	4.77034e-17	1.7798e-11	19	41197049	NUMBL	TSS1500-island
cg26555310	female	0.117643	0.0130271	4.80647e-17	1.79328e-11	1	68914717	RPE65	Body-opensea
cg06142122	female	0.0976817	0.0108167	4.80647e-17	1.79328e-11	16	85695032	KIAA0182	Body-opensea
cg25799994	female	-0.0461823	0.00511525	4.88273e-17	1.82174e-11	2	166650699	GALNT3	5'UTR-island
cg05982686	female	0.120447	0.0133428	4.92505e-17	1.83752e-11	17	59564954		IGR-opensea
cg03452625	female	0.27006	0.0299253	5.01502e-17	1.87109e-11	3	11537620	ATG7	Body-opensea
cg09960553	female	-0.0700691	0.00776567	5.06877e-17	1.89115e-11	16	87840374		IGR-opensea
cg10392428	female	0.135715	0.0150471	5.19552e-17	1.93844e-11	14	89782402	FOXN3	Body-opensea
cg15781838	female	0.094641	0.0104943	5.23151e-17	1.95186e-11	2	128422717	LIMS2	Body-shore
cg24335984	female	0.11876	0.0131691	5.24e-17	1.95503e-11	3	50361554	HYAL2	TSS1500-shore
cg21573135	female	0.100881	0.0111873	5.26298e-17	1.96361e-11	15	71595576	THSD4	Body-opensea
cg24185397	female	-0.107654	0.0119395	5.29357e-17	1.97502e-11	17	25659609		IGR-shore
cg19911880	female	0.0994005	0.0110257	5.34133e-17	1.99284e-11	8	131353969	ASAP1	Body-opensea
cg20935245	female	0.0547883	0.00607826	5.39664e-17	2.01348e-11	15	42234343	EHD4	Body-opensea
cg13314863	female	0.122436	0.0135866	5.4825e-17	2.04551e-11	10	94594490	EXOC6	5'UTR-opensea
cg26389737	female	0.238441	0.026471	5.63125e-17	2.10101e-11	7	150673192	KCNH2	Body-shore
cg20617977	female	0.210834	0.0234077	5.65467e-17	2.10975e-11	4	38053457	TBC1D1	Body-opensea
cg04769392	female	-0.0434353	0.00482315	5.71086e-17	2.13071e-11	6	80579458		IGR-opensea
cg24687805	female	-0.186829	0.0207461	5.71327e-17	2.13161e-11	15	55513621	RAB27A	Body-opensea
cg02048613	female	0.156407	0.0173716	5.78867e-17	2.15974e-11	2	161343862	RBMS1	Body-opensea
cg04420878	female	-0.0209484	0.00232707	5.85101e-17	2.183e-11	8	56987290	RPS20	TSS200-island
cg17093088	female	-0.114653	0.0127366	5.85843e-17	2.18577e-11	7	6544329	GRID2IP	Body-shore
cg25792439	female	0.127727	0.014189	5.86025e-17	2.18645e-11	17	78163268	CARD14	Body-shore
cg07120889	female	-0.173911	0.0193196	5.86362e-17	2.18771e-11	1	150535935		IGR-shore
cg25736251	female	-0.188581	0.0209531	5.92853e-17	2.21192e-11	3	61235869	FHIT	5'UTR-shore
cg24354624	female	-0.133577	0.0148471	6.06575e-17	2.26312e-11	19	40732728	CNTD2	TSS200-shore
cg23009508	female	0.122531	0.0136198	6.07597e-17	2.26693e-11	2	23913568	KLHL29	Body-island
cg21097354	female	0.232539	0.025854	6.17103e-17	2.3024e-11	7	27179161		IGR-island
cg03291548	female	0.13668	0.0152009	6.28631e-17	2.34541e-11	22	18266804		IGR-shore
cg22858288	female	0.152185	0.0169265	6.31822e-17	2.35732e-11	11	2930322	SLC22A18	Body-island
cg07264904	female	0.140154	0.0155901	6.35834e-17	2.37229e-11	13	113633855	MCF2L	Body-island
cg14171460	female	0.17763	0.0197655	6.49344e-17	2.42269e-11	1	3332188	PRDM16	Body-island
cg07435350	female	0.0441201	0.00491025	6.56479e-17	2.44931e-11	11	14539217	PSMA1	Body-shelf
cg17872886	female	0.166698	0.0185562	6.65108e-17	2.48151e-11	2	3642732	COLEC11	1stExon-island
cg17180631	female	-0.262285	0.0292059	6.78315e-17	2.53078e-11	1	201708788	NAV1	TSS200-island
cg06851000	female	0.173391	0.0193166	6.9848e-17	2.60602e-11	1	33627109	TRIM62	Body-shore
cg17831440	female	0.167884	0.0187034	6.99161e-17	2.60855e-11	13	113699526	MCF2L	Body-shelf
cg02460652	female	-0.123949	0.0138087	6.99238e-17	2.60884e-11	15	76431858	C15orf27	Body-opensea
cg14104252	female	0.0990372	0.011035	7.05477e-17	2.63212e-11	9	116263568	RGS3	TSS200-opensea
cg14864572	female	0.0704777	0.00785329	7.08079e-17	2.64183e-11	8	129505584		IGR-opensea
cg24539599	female	-0.215523	0.024016	7.08804e-17	2.64453e-11	5	112824920	MCC	TSS1500-shore
cg14988680	female	0.14447	0.0161024	7.19548e-17	2.68462e-11	1	212688417		IGR-island
cg02412969	female	-0.0370311	0.00412825	7.28342e-17	2.71743e-11	7	5602052		IGR-island
cg26680989	female	0.120786	0.0134674	7.35371e-17	2.74366e-11	16	85560739		IGR-opensea
cg21195843	female	0.119093	0.0132798	7.39493e-17	2.75904e-11	20	37077836	SNORA60	TSS200-shore
cg15570148	female	-0.186747	0.0208278	7.48238e-17	2.79166e-11	3	61235985	FHIT	5'UTR-shore
cg22278106	female	-0.0871976	0.00972692	7.56964e-17	2.82422e-11	2	169746720	SPC25	5'UTR-island
cg02050917	female	0.157228	0.0175485	7.82839e-17	2.92075e-11	1	2173571	SKI	Body-opensea
cg19669385	female	0.205847	0.0229765	7.86289e-17	2.93363e-11	17	800263	NXN	Body-opensea
cg06188545	female	0.217741	0.0243358	8.51586e-17	3.17725e-11	1	156863643	PEAR1	5'UTR-island
cg07059052	female	-0.170955	0.0191078	8.54503e-17	3.18813e-11	16	2828302	TCEB2	TSS1500-shore
cg03799957	female	-0.0652518	0.00729363	8.57281e-17	3.1985e-11	8	42249026	VDAC3	TSS1500-shore
cg17343374	female	0.131051	0.0146491	8.59643e-17	3.20731e-11	4	901981	GAK	Body-shore
cg12245706	female	0.25683	0.0287247	8.893e-17	3.31796e-11	2	71823484	DYSF	Body-opensea
cg21095797	female	0.113578	0.0127033	8.911e-17	3.32468e-11	6	139716839		IGR-opensea
cg19262637	female	0.234467	0.0262412	9.26556e-17	3.45696e-11	1	240783328		IGR-opensea
cg27195914	female	-0.236295	0.0264609	9.59666e-17	3.58049e-11	16	66907460		IGR-shore
cg05345283	female	0.109757	0.0122924	9.66911e-17	3.60752e-11	11	941207	AP2A2	Body-shelf
cg19830983	female	0.133679	0.0149727	9.71374e-17	3.62418e-11	17	75125896		IGR-opensea
cg24630516	female	0.129158	0.0144669	9.73532e-17	3.63223e-11	11	75852389	UVRAG	Body-opensea
cg19662219	female	0.198601	0.0222526	9.93673e-17	3.70737e-11	15	34260719	AVEN	Body-opensea
cg10724576	female	0.0593122	0.00664701	1.00538e-16	3.75106e-11	8	144561662	ZC3H3	Body-shelf
cg14598764	female	0.146353	0.0164017	1.00615e-16	3.75394e-11	3	125820484	SLC41A3	TSS200-opensea
cg10896774	female	-0.169465	0.0189991	1.03011e-16	3.8433e-11	7	142636840	C7orf34	1stExon-opensea
cg10095247	female	0.0444228	0.00498133	1.04244e-16	3.88934e-11	7	91897276	ANKIB1	5'UTR-opensea
cg09060914	female	0.129245	0.0144929	1.04268e-16	3.89022e-11	1	169599558	SELP	TSS200-opensea
cg20017590	female	0.289901	0.0325123	1.05107e-16	3.92154e-11	2	54852195	SPTBN1	Body-shelf
cg00575153	female	-0.166836	0.0187189	1.07982e-16	4.02879e-11	8	145047469	PLEC1	Body-island
cg13575139	female	-0.149689	0.0167996	1.098e-16	4.09661e-11	3	58456976		IGR-opensea
cg00843416	female	0.14024	0.0157412	1.10698e-16	4.13012e-11	17	40914631	LOC100190938	TSS1500-shore
cg10640333	female	0.167365	0.0187861	1.10747e-16	4.13196e-11	2	63280625	OTX1	Body-shore
cg21373156	female	0.221349	0.0248457	1.10811e-16	4.13433e-11	17	80307284		IGR-shelf
cg08995609	female	-0.239386	0.0268768	1.12426e-16	4.19459e-11	11	66104115	RIN1	TSS200-shore
cg09347582	female	0.141707	0.0159103	1.12587e-16	4.20062e-11	1	233497916	KIAA1804	Body-island
cg14906690	female	0.116538	0.0130846	1.12652e-16	4.20302e-11	10	76573506		IGR-island
cg02264229	female	0.146712	0.0164756	1.1398e-16	4.25257e-11	14	95240560		IGR-shore
cg21871883	female	-0.188936	0.02122	1.14853e-16	4.28516e-11	21	34145043	C21orf49	Body-shore
cg19984146	female	-0.151876	0.0170583	1.1511e-16	4.29472e-11	10	90968091	CH25H	TSS1500-shore
cg23595396	female	-0.15778	0.017727	1.17317e-16	4.37707e-11	6	31164914	HCG27	TSS1500-shore
cg19912283	female	0.150846	0.0169494	1.17966e-16	4.40131e-11	6	30884590	VARS2	Body-shelf
cg08207707	female	0.26476	0.0297506	1.18317e-16	4.41438e-11	11	124630919	ESAM	Body-shore
cg16565696	female	-0.208903	0.0234755	1.18799e-16	4.43236e-11	20	44834899	CDH22	Body-shelf
cg12865888	female	0.195602	0.0219829	1.19502e-16	4.45858e-11	8	141220177	TRAPPC9	Body-opensea
cg01409343	female	-0.208373	0.0234215	1.20511e-16	4.49625e-11	17	57915740	TMEM49	Body-opensea
cg00026553	female	0.130742	0.0146981	1.21787e-16	4.54383e-11	15	90562839	ZNF710	5'UTR-opensea
cg26214026	female	0.24786	0.0278652	1.21899e-16	4.54803e-11	12	111926384	ATXN2	Body-opensea
cg11820929	female	0.0974883	0.01096	1.21931e-16	4.54921e-11	4	102258631	PPP3CA	Body-opensea
cg18175779	female	0.192126	0.0216024	1.22919e-16	4.58607e-11	1	43770851	TIE1	Body-island
cg04871778	female	-0.114578	0.0128839	1.23464e-16	4.6064e-11	1	55267125	TTC22	TSS200-shore
cg13634242	female	-0.347604	0.0390915	1.2434e-16	4.63912e-11	5	60921891		IGR-island
cg20308204	female	0.107857	0.0121296	1.24369e-16	4.64018e-11	22	32750782	RFPL3	TSS200-opensea
cg01087419	female	0.037399	0.00420663	1.25681e-16	4.68913e-11	12	14959261	C12orf69	Body-shelf
cg00955780	female	0.111874	0.0125876	1.28114e-16	4.77991e-11	12	8025861	SLC2A14	TSS1500-island
cg16833233	female	0.137632	0.0154936	1.32154e-16	4.93065e-11	11	128205290		IGR-opensea
cg24976258	female	0.0956831	0.0107721	1.32742e-16	4.95258e-11	5	73883404		IGR-opensea
cg04271792	female	-0.0764683	0.00861004	1.33838e-16	4.99347e-11	6	28831393		IGR-shore
cg16530437	female	-0.0556543	0.00626745	1.35121e-16	5.04133e-11	17	53315783		IGR-island
cg01931840	female	0.0448984	0.00505799	1.3808e-16	5.15175e-11	4	129192374	PGRMC2	3'UTR-opensea
cg16136079	female	0.0841425	0.00948009	1.39048e-16	5.18787e-11	13	113811690	PROZ	TSS1500-shelf
cg20018563	female	0.171767	0.0193549	1.4009e-16	5.22675e-11	15	92690264	SLCO3A1	Body-opensea
cg02918093	female	0.100364	0.0113103	1.40963e-16	5.25931e-11	16	10717941		IGR-shelf
cg19372975	female	0.183293	0.0206631	1.4405e-16	5.37446e-11	2	242212901	HDLBP	5'UTR-shore
cg02114728	female	-0.0200303	0.00225843	1.45413e-16	5.42534e-11	2	169102929	STK39	Body-shore
cg00467652	female	0.190294	0.0214705	1.51604e-16	5.65631e-11	3	50357644	HYAL2	Body-island
cg04581004	female	0.0687724	0.00776145	1.53964e-16	5.74438e-11	12	7281333	RBP5	1stExon-opensea
cg11006442	female	0.0775414	0.00875117	1.54052e-16	5.74764e-11	6	149721145	MAP3K7IP2	Body-opensea
cg16367976	female	-0.046923	0.00529748	1.57326e-16	5.86981e-11	22	50969678	TYMP	TSS1500-island
cg02607059	female	0.140752	0.0158906	1.57371e-16	5.87148e-11	15	101632053		IGR-shelf
cg01649611	female	-0.188265	0.021257	1.58405e-16	5.91007e-11	2	43521066	THADA	Body-opensea
cg07212543	female	0.19209	0.0217017	1.64125e-16	6.12348e-11	13	113613737		IGR-opensea
cg22908679	female	-0.181946	0.0205561	1.64382e-16	6.13305e-11	14	79746212	NRXN3	Body-shore
cg17243289	female	-0.159623	0.018039	1.67078e-16	6.23366e-11	18	45458021	SMAD2	TSS1500-island
cg08686960	female	0.139067	0.0157237	1.72115e-16	6.42157e-11	19	36642720	COX7A1	Body-island
cg11225330	female	0.0899215	0.0101676	1.7272e-16	6.44416e-11	1	1196747	UBE2J2	Body-opensea
cg03074946	female	0.143067	0.0161777	1.73225e-16	6.46298e-11	12	120687694	PXN	5'UTR-opensea
cg22695379	female	0.0889779	0.0100615	1.73325e-16	6.46671e-11	5	137593551	GFRA3	Body-island
cg24714561	female	0.091794	0.0103827	1.7616e-16	6.57249e-11	14	90001131	FOXN3	5'UTR-opensea
cg21270243	female	-0.190266	0.0215262	1.78833e-16	6.67221e-11	2	216176248	ATIC	TSS1500-shore
cg14028671	female	0.238741	0.0270117	1.79281e-16	6.68895e-11	9	139937558	NPDC1	Body-shelf
cg14776518	female	-0.244516	0.0276707	1.81499e-16	6.7717e-11	15	63892607	FBXL22	Body-shore
cg05354479	female	-0.131592	0.0148943	1.83437e-16	6.84401e-11	14	71276874	MAP3K9	TSS1500-shore
cg18598029	female	-0.136036	0.0154016	1.86554e-16	6.96031e-11	6	31164921	HCG27	TSS1500-shore
cg02307239	female	0.163984	0.0185675	1.87632e-16	7.00053e-11	4	174421558		IGR-island
cg21580089	female	0.130023	0.0147259	1.90454e-16	7.10582e-11	4	54424476	LNX1	TSS200-opensea
cg07949777	female	0.122045	0.0138287	1.95771e-16	7.30417e-11	2	128388876	MYO7B	Body-opensea
cg13237945	female	0.114638	0.0129899	1.96268e-16	7.32271e-11	13	43355739	C13orf30	1stExon-opensea
cg08155116	female	0.182866	0.020721	1.96302e-16	7.32398e-11	17	79027207	BAIAP2	Body-shore
cg19343530	female	-0.0683505	0.00774503	1.96352e-16	7.32584e-11	6	28831388		IGR-shore
cg08021727	female	0.0339346	0.00384526	1.96416e-16	7.32823e-11	16	4056879	ADCY9	Body-opensea
cg19174643	female	-0.182786	0.0207137	1.97298e-16	7.36115e-11	18	13136426		IGR-shore
cg03424058	female	0.0959264	0.0108717	1.9846e-16	7.40449e-11	1	215791864	KCTD3	Body-opensea
cg16579438	female	-0.16088	0.0182337	1.98852e-16	7.41912e-11	3	24537301	THRB	TSS1500-island
cg17888086	female	-0.148818	0.0168716	2.024e-16	7.55152e-11	1	37945057	ZC3H12A	Body-opensea
cg02386822	female	-0.160805	0.0182328	2.03857e-16	7.60586e-11	1	155162871	MUC1	TSS200-shore
cg05302218	female	0.127873	0.0144995	2.04481e-16	7.62913e-11	12	125320887	SCARB1	Body-shelf
cg12126901	female	-0.334967	0.0379886	2.06669e-16	7.71078e-11	1	61623366	NFIA	Body-opensea
cg01377200	female	0.146683	0.0166427	2.12202e-16	7.91723e-11	4	184938316	STOX2	Body-opensea
cg06821075	female	0.0267049	0.00303007	2.12728e-16	7.93685e-11	10	99933209	C10orf28	5'UTR-opensea
cg05673882	female	-0.188007	0.0213371	2.15694e-16	8.04748e-11	5	74862702	POLK	Body-opensea
cg24613080	female	0.223946	0.0254162	2.15861e-16	8.05371e-11	17	32484035	ACCN1	TSS1500-island
cg12099279	female	-0.140044	0.0159	2.20866e-16	8.24048e-11	19	40732518	CNTD2	1stExon-island
cg20597403	female	0.157968	0.0179351	2.20978e-16	8.24463e-11	7	4305042	SDK1	Body-island
cg17881600	female	0.199699	0.0226736	2.21228e-16	8.25399e-11	6	17012979		IGR-opensea
cg23633330	female	-0.156548	0.0177749	2.21644e-16	8.26948e-11	1	207510679	CD55	Body-opensea
cg12325536	female	0.173091	0.0196537	2.21973e-16	8.28175e-11	5	87968658	LOC645323	Body-island
cg19294311	female	-0.189652	0.0215384	2.24635e-16	8.38108e-11	15	62358920	C2CD4A	TSS1500-shore
cg17849569	female	0.116896	0.0132782	2.27224e-16	8.4777e-11	6	28058911	ZSCAN12L1	TSS200-opensea
cg07745344	female	0.151341	0.0171976	2.32676e-16	8.68109e-11	8	514802		IGR-opensea
cg02258201	female	0.155146	0.0176316	2.34017e-16	8.73112e-11	9	35906148	HRCT1	TSS200-opensea
cg20687616	female	0.142643	0.0162148	2.37543e-16	8.86268e-11	1	56883736		IGR-opensea
cg16419054	female	0.115454	0.0131245	2.37963e-16	8.87836e-11	14	105804208	PACS2	Body-opensea
cg27284041	female	0.141846	0.0161252	2.38454e-16	8.89669e-11	6	53722164	LRRC1	Body-opensea
cg07977202	female	0.113448	0.0128995	2.41261e-16	9.00139e-11	11	66311348	ZDHHC24	Body-shore
cg08807414	female	0.144732	0.0164599	2.44238e-16	9.11246e-11	16	85608505		IGR-opensea
cg19565757	female	-0.0807799	0.0091871	2.44641e-16	9.1275e-11	5	43557653	PAIP1	TSS1500-shore
cg06322432	female	-0.0972015	0.0110602	2.51912e-16	9.3988e-11	10	112289853		IGR-shore
cg11399254	female	0.103784	0.0118205	2.66708e-16	9.95082e-11	1	47694517	TAL1	5'UTR-shore
cg05106892	female	0.109107	0.0124314	2.72782e-16	1.01774e-10	15	99670731	SYNM	Body-opensea
cg21442881	female	0.0904666	0.0103087	2.74515e-16	1.02421e-10	8	142160081	DENND3	Body-opensea
cg24185429	female	0.0788795	0.0089908	2.7908e-16	1.04124e-10	11	134231621	GLB1L2	Body-shore
cg08362273	female	0.161606	0.0184271	2.85426e-16	1.06492e-10	17	46719577		IGR-island
cg22467301	female	-0.131115	0.0149503	2.85449e-16	1.065e-10	3	50265698		IGR-shore
cg07568015	female	0.0961697	0.0109675	2.88294e-16	1.07562e-10	11	13367266	ARNTL	5'UTR-opensea
cg11532513	female	0.175974	0.0200886	3.05759e-16	1.14078e-10	3	54962242	LRTM1	TSS200-opensea
cg24327132	female	-0.259917	0.0296747	3.07906e-16	1.14879e-10	15	72520632	PKM2	5'UTR-shore
cg18719939	female	-0.121568	0.0138796	3.08118e-16	1.14958e-10	3	48545308		IGR-shelf
cg26828839	female	-0.311867	0.0356131	3.11641e-16	1.16273e-10	12	6054749	ANO2	Body-opensea
cg12042952	female	0.252809	0.0288724	3.13813e-16	1.17083e-10	2	100723240	AFF3	TSS1500-shelf
cg07480446	female	0.104132	0.0118957	3.18716e-16	1.18912e-10	2	239069576		IGR-shore
cg11376227	female	0.0758699	0.00866767	3.19974e-16	1.19382e-10	4	113333069	ALPK1	Body-island
cg18883209	female	0.0712032	0.0081352	3.21519e-16	1.19958e-10	22	44394601	PARVB	TSS1500-shore
cg15105326	female	0.155742	0.0177992	3.27087e-16	1.22035e-10	3	147108916	ZIC4	Body-island
cg25224048	female	0.155185	0.017737	3.28694e-16	1.22635e-10	5	38467248		IGR-opensea
cg22274829	female	-0.150794	0.0172394	3.33608e-16	1.24468e-10	4	82393723	RASGEF1B	TSS1500-shore
cg05068777	female	0.0572316	0.00654344	3.35028e-16	1.24998e-10	7	127426100	SND1	Body-opensea
cg10611580	female	-0.232392	0.0265805	3.43025e-16	1.27982e-10	17	75319942	2024-09-09	5'UTR-opensea
cg20850016	female	-0.109836	0.0125696	3.54114e-16	1.32119e-10	3	5165254	ARL8B	Body-shore
cg24301690	female	-0.168768	0.0193221	3.63319e-16	1.35554e-10	3	128712676	KIAA1257	5'UTR-island
cg05400252	female	0.0762941	0.00873572	3.65465e-16	1.36354e-10	12	57394816	ZBTB39	3'UTR-opensea
cg23283423	female	0.161189	0.01846	3.69934e-16	1.38021e-10	17	821546	NXN	Body-opensea
cg22679725	female	0.0501391	0.0057427	3.7208e-16	1.38822e-10	1	27702662	FCN3	TSS1500-opensea
cg08151809	female	-0.0690239	0.00790735	3.76776e-16	1.40574e-10	7	151480352	PRKAG2	Body-island
cg16784745	female	0.0918341	0.010521	3.77978e-16	1.41023e-10	12	54731086	MIR148B	Body-opensea
cg02560808	female	-0.0347945	0.00398629	3.78161e-16	1.41091e-10	16	70835289	VAC14	TSS1500-island
cg04747180	female	0.178636	0.0204667	3.79214e-16	1.41484e-10	4	39116218	KLHL5	Body-opensea
cg05062178	female	-0.137609	0.0157724	3.88126e-16	1.44809e-10	3	124605247	ITGB5	Body-island
cg00335591	female	-0.172454	0.0197838	4.09012e-16	1.52602e-10	7	1596260	TMEM184A	TSS200-opensea
cg15727424	female	-0.0782955	0.00898235	4.10009e-16	1.52973e-10	6	32016100	TNXB	Body-opensea
cg00396667	female	0.253668	0.0291039	4.11813e-16	1.53647e-10	5	134364387	PITX1	3'UTR-island
cg00233633	female	-0.254436	0.0291925	4.12177e-16	1.53783e-10	7	29153560	CPVL	Body-opensea
cg11027217	female	0.156779	0.0180034	4.3362e-16	1.61783e-10	4	113300650	ALPK1	Body-island
cg11201447	female	-0.384713	0.0441784	4.3403e-16	1.61936e-10	8	128808063	MIR1204	TSS200-shore
cg16679302	female	0.076369	0.00876989	4.34265e-16	1.62024e-10	16	85622276		IGR-opensea
cg21275690	female	-0.235996	0.027109	4.4205e-16	1.64928e-10	16	3072970	HCFC1R1	Body-shore
cg11797226	female	0.102862	0.0118174	4.45752e-16	1.66309e-10	17	27028982	SUPT6H	3'UTR-opensea
cg26061582	female	-0.0593805	0.00682261	4.48018e-16	1.67155e-10	7	22766209	IL6	TSS1500-opensea
cg10954765	female	0.0816717	0.00938406	4.48762e-16	1.67432e-10	4	3412750	RGS12	Body-shore
cg09717333	female	-0.0617234	0.00709204	4.48888e-16	1.67479e-10	4	140222144	NAA15	TSS1500-shore
cg17177602	female	0.13379	0.0153776	4.57684e-16	1.70761e-10	1	1196457	UBE2J2	Body-opensea
cg11191040	female	-0.0286109	0.00328948	4.65875e-16	1.73817e-10	1	28907634	SNHG12	Body-shore
cg19979773	female	0.0477184	0.00548702	4.69365e-16	1.75119e-10	1	27702651	FCN3	TSS1500-opensea
cg22694818	female	0.196639	0.0226125	4.71187e-16	1.75799e-10	1	75595970	LHX8	5'UTR-island
cg12663656	female	-0.0340809	0.00391947	4.73574e-16	1.7669e-10	12	120427667	CCDC64	1stExon-island
cg03155200	female	0.176052	0.0202574	4.88312e-16	1.82188e-10	11	2833259	KCNQ1	Body-opensea
cg07987843	female	-0.12468	0.0143481	4.91878e-16	1.83519e-10	12	3309495	TSPAN9	5'UTR-island
cg17104824	female	0.192514	0.0221569	4.95072e-16	1.8471e-10	2	177014959	HOXD4	TSS1500-island
cg14212038	female	-0.259064	0.0298234	5.02158e-16	1.87354e-10	11	66738758		IGR-opensea
cg24945701	female	0.194249	0.0223782	5.24144e-16	1.95557e-10	3	62362783		IGR-island
cg16551849	female	0.0933797	0.0107578	5.24259e-16	1.956e-10	6	38563655	BTBD9	Body-opensea
cg11582189	female	0.100871	0.0116278	5.43132e-16	2.02641e-10	1	95313200	SLC44A3	Body-opensea
cg04119529	female	0.139023	0.0160316	5.54847e-16	2.07012e-10	16	2094667	NTHL1	Body-shelf
cg14343733	female	0.169082	0.0194986	5.56005e-16	2.07444e-10	9	130703735	FAM102A	3'UTR-shelf
cg10241809	female	-0.152967	0.017641	5.57557e-16	2.08024e-10	17	80197360	SLC16A3	3'UTR-shore
cg08438705	female	0.140612	0.0162194	5.64094e-16	2.10463e-10	19	1152189	SBNO2	Body-island
cg03369382	female	0.10552	0.0121721	5.65512e-16	2.10991e-10	7	139427635	HIPK2	Body-opensea
cg04218880	female	0.149179	0.0172108	5.70265e-16	2.12765e-10	1	40388264		IGR-opensea
cg27025738	female	0.122918	0.0141816	5.71581e-16	2.13256e-10	14	72006683	SIPA1L1	5'UTR-opensea
cg20333001	female	0.112258	0.0129541	5.77608e-16	2.15504e-10	2	242212896	HDLBP	5'UTR-shore
cg15541630	female	0.186506	0.0215284	5.87758e-16	2.19291e-10	8	87081770	PSKH2	1stExon-island
cg26708781	female	0.139718	0.016129	5.90761e-16	2.20412e-10	4	87921477	AFF1	Body-opensea
cg02744699	female	0.0700586	0.00808844	5.94549e-16	2.21825e-10	17	80197898		IGR-shelf
cg27508620	female	0.156169	0.0180306	5.95503e-16	2.22181e-10	7	21209725		IGR-opensea
cg05902503	female	0.141395	0.0163259	5.97675e-16	2.22991e-10	16	30133175	MAPK3	Body-shore
cg06100227	female	-0.0489712	0.00565589	6.07196e-16	2.26544e-10	6	36098581	MAPK13	Body-island
cg16966315	female	0.20963	0.0242124	6.09125e-16	2.27263e-10	7	149112318		IGR-island
cg04875128	female	0.236707	0.0273423	6.12465e-16	2.28509e-10	15	31775895	OTUD7A	Body-island
cg08957564	female	0.239591	0.02768	6.18445e-16	2.3074e-10	16	12071814	RUNDC2A	Body-shore
cg24972297	female	-0.0626363	0.00723702	6.21541e-16	2.31896e-10	4	153857113		IGR-island
cg23886101	female	0.169123	0.0195474	6.34226e-16	2.36628e-10	7	44438216	NUDCD3	Body-opensea
cg23982678	female	-0.0487535	0.00563507	6.34986e-16	2.36912e-10	1	207224227	YOD1	1stExon-island
cg12558519	female	-0.0315207	0.00364522	6.55349e-16	2.44509e-10	19	18748017	KLHL26	Body-opensea
cg07059009	female	0.115024	0.0133023	6.56341e-16	2.44879e-10	2	64494859		IGR-opensea
cg18948877	female	0.165569	0.0191595	6.8005e-16	2.53725e-10	2	242904738		IGR-opensea
cg21811021	female	0.131995	0.01528	6.9485e-16	2.59247e-10	4	6659346		IGR-island
cg25479097	female	0.10914	0.0126382	7.07396e-16	2.63928e-10	13	113305704	C13orf35	5'UTR-shelf
cg00891541	female	0.241754	0.0279951	7.08269e-16	2.64254e-10	16	68481487	SMPD3	5'UTR-island
cg19527959	female	0.126183	0.0146132	7.11818e-16	2.65578e-10	6	168394191		IGR-shelf
cg06383798	female	0.08971	0.010391	7.18588e-16	2.68104e-10	17	65971194	BPTF	Body-opensea
cg26924967	female	-0.124917	0.0144713	7.25386e-16	2.7064e-10	19	3136097	GNA15	TSS200-opensea
cg09862950	female	-0.102598	0.0118881	7.33795e-16	2.73777e-10	6	132275639		IGR-shelf
cg20924425	female	0.143716	0.0166643	7.64817e-16	2.85352e-10	2	240121297	HDAC4	Body-opensea
cg22734676	female	0.111036	0.0128765	7.69824e-16	2.8722e-10	4	185139478	ENPP6	TSS1500-opensea
cg22022716	female	0.160008	0.018557	7.73288e-16	2.88512e-10	8	26276541		IGR-opensea
cg12332536	female	0.098966	0.0114778	7.74134e-16	2.88828e-10	3	46450983	CCRL2	3'UTR-opensea
cg12215739	female	0.221254	0.0256606	7.74459e-16	2.88949e-10	2	177014966	HOXD4	TSS1500-island
cg08087868	female	0.187897	0.0217988	7.88784e-16	2.94294e-10	16	51188129		IGR-island
cg03619332	female	-0.185051	0.0214698	7.91129e-16	2.95169e-10	16	585859	SOLH	5'UTR-shore
cg20158248	female	-0.111744	0.0129666	7.98231e-16	2.97818e-10	16	16042956	ABCC1	TSS1500-shore
cg09315172	female	0.147111	0.017071	7.99318e-16	2.98224e-10	1	1860133		IGR-shore
cg00542992	female	-0.18875	0.0219053	8.04539e-16	3.00172e-10	5	141595654		IGR-opensea
cg25991756	female	-0.0186087	0.00216008	8.14674e-16	3.03953e-10	6	30034178	PPP1R11	TSS1500-opensea
cg17072519	female	0.190218	0.0220844	8.23236e-16	3.07148e-10	22	21322063	AIFM3	5'UTR-shelf
cg11084334	female	0.159051	0.0184717	8.38357e-16	3.12789e-10	3	9594264	LHFPL4	Body-island
cg11366683	female	0.0706357	0.00820359	8.39432e-16	3.1319e-10	5	142189566	ARHGAP26	Body-opensea
cg19020855	female	0.165882	0.0192687	8.47524e-16	3.1621e-10	17	41669266		IGR-opensea
cg04149500	female	0.0595867	0.00692155	8.4774e-16	3.1629e-10	11	110344815		IGR-opensea
cg07435237	female	-0.102748	0.0119365	8.53392e-16	3.18399e-10	16	31469562	ARMC5	TSS1500-shore
cg13974464	female	-0.184916	0.0214836	8.56654e-16	3.19616e-10	19	49224165	MAMSTR	TSS1500-island
cg13212362	female	0.0996434	0.0115783	8.63805e-16	3.22284e-10	1	21648026	ECE1	Body-opensea
cg05498726	female	0.152494	0.0177256	8.81742e-16	3.28976e-10	22	19512942	CLDN5	TSS200-shore
cg23474190	female	-0.160659	0.0186756	8.84352e-16	3.2995e-10	21	38937109		IGR-shore
cg13384850	female	0.0814598	0.00946976	8.87219e-16	3.3102e-10	7	158589520	ESYT2	Body-opensea
cg21143896	female	0.164055	0.0190745	8.95233e-16	3.3401e-10	7	2802374	GNA12	Body-shore
cg27091787	female	0.14143	0.0164452	8.99411e-16	3.35568e-10	3	50360690	HYAL2	TSS1500-shore
cg06958537	female	-0.0929818	0.0108124	9.02382e-16	3.36677e-10	21	40176950	ETS2	TSS1500-shore
cg18733230	female	0.0729402	0.00848203	9.03578e-16	3.37123e-10	7	4763182	FOXK1	Body-shore
cg04271289	female	0.149277	0.0173609	9.09063e-16	3.39169e-10	19	1152147	SBNO2	Body-island
cg20975682	female	0.13092	0.0152295	9.21451e-16	3.43791e-10	12	50019676	PRPF40B	5'UTR-shelf
cg08157914	female	0.103708	0.0120641	9.21493e-16	3.43807e-10	7	2646478	IQCE	Body-shore
cg14050824	female	0.19642	0.0228572	9.40909e-16	3.51051e-10	9	140683797	EHMT1	Body-shore
cg07189157	female	-0.047868	0.00557173	9.54419e-16	3.56092e-10	7	149119407		IGR-island
cg02216727	female	0.150402	0.0175082	9.60109e-16	3.58215e-10	17	38520653	GJD3	1stExon-shore
cg19603836	female	0.174116	0.0202725	9.70328e-16	3.62027e-10	10	30317688	KIAA1462	Body-opensea
cg15260552	female	0.122039	0.0142115	9.79362e-16	3.65398e-10	12	64338402	SRGAP1	Body-opensea
cg14565439	female	0.0718807	0.00837598	1.01707e-15	3.79466e-10	5	107702185	FBXL17	Body-opensea
cg06624731	female	0.0719542	0.00838471	1.01817e-15	3.79877e-10	7	1889793	MAD1L1	Body-shore
cg12167688	female	0.14158	0.0165002	1.026e-15	3.828e-10	17	2771225	RAP1GAP2	Body-opensea
cg06376214	female	-0.0635986	0.00741409	1.04258e-15	3.88983e-10	1	26633439	UBXN11	5'UTR-shore
cg01973181	female	0.228438	0.0266338	1.0501e-15	3.91789e-10	12	124436804	CCDC92	5'UTR-opensea
cg04608356	female	-0.20658	0.0240861	1.05204e-15	3.92515e-10	1	27668433	SYTL1	TSS200-opensea
cg22559878	female	0.112888	0.0131657	1.06859e-15	3.98687e-10	17	1038005	ABR	Body-opensea
cg21076680	female	-0.246408	0.0287475	1.08985e-15	4.06621e-10	2	69135655		IGR-opensea
cg22032532	female	-0.115197	0.0134415	1.09856e-15	4.09869e-10	12	88974665	KITLG	TSS1500-island
cg09990600	female	-0.109267	0.0127503	1.10257e-15	4.11366e-10	7	1596103	TMEM184A	TSS200-opensea
cg05726109	female	0.216951	0.0253162	1.10318e-15	4.11593e-10	22	19709755	2024-09-05	Body-island
cg01802545	female	-0.217213	0.0253529	1.1186e-15	4.17346e-10	14	93196432	LGMN	Body-opensea
cg25387812	female	0.0841369	0.00982157	1.12641e-15	4.2026e-10	1	44554657		IGR-opensea
cg08005122	female	-0.192196	0.0224384	1.13413e-15	4.23143e-10	11	110779637		IGR-opensea
cg01771479	female	-0.177548	0.0207282	1.13416e-15	4.23154e-10	8	144198810		IGR-opensea
cg27015161	female	0.1749	0.0204246	1.152e-15	4.2981e-10	2	24816070	NCOA1	5'UTR-opensea
cg00538381	female	0.130965	0.0152973	1.16691e-15	4.35373e-10	2	20864068		IGR-shore
cg16747567	female	-0.0304362	0.00355516	1.16807e-15	4.35806e-10	14	71373858	PCNX	TSS1500-shore
cg00190206	female	0.174228	0.0203512	1.16845e-15	4.35948e-10	2	176999353		IGR-shore
cg06092869	female	-0.220212	0.0257298	1.18755e-15	4.43072e-10	1	225642746		IGR-opensea
cg01032851	female	0.119819	0.0140018	1.1974e-15	4.46747e-10	16	68994912	TMCO7	Body-opensea
cg24785726	female	0.295237	0.0345099	1.2157e-15	4.53576e-10	13	78491982	EDNRB	Body-shore
cg04240373	female	-0.0601768	0.00703534	1.22933e-15	4.58662e-10	1	109969611	PSMA5	TSS1500-shore
cg07565042	female	0.160588	0.0187782	1.2434e-15	4.63911e-10	11	10543456	RNF141	Body-opensea
cg16475811	female	0.149266	0.01746	1.26674e-15	4.72617e-10	11	69308726		IGR-opensea
cg16616467	female	0.1622	0.018975	1.27495e-15	4.7568e-10	16	89642914	CPNE7	Body-island
cg10933003	female	0.16125	0.0188641	1.27552e-15	4.75893e-10	4	174448341	HAND2	3'UTR-island
cg11351809	female	0.225054	0.0263304	1.28138e-15	4.78081e-10	17	14213798	HS3ST3B1	Body-shore
cg05455680	female	0.0517533	0.0060558	1.29203e-15	4.82055e-10	22	44394758	PARVB	TSS1500-shelf
cg09464206	female	-0.213887	0.0250326	1.3073e-15	4.87753e-10	2	202122309	CASP8	5'UTR-opensea
cg01258488	female	0.0763814	0.00894206	1.32944e-15	4.96011e-10	12	71116333	PTPRR	Body-opensea
cg17035132	female	0.139525	0.0163391	1.35165e-15	5.04298e-10	11	2504160	KCNQ1	Body-opensea
cg05516004	female	0.0618404	0.00724286	1.36259e-15	5.08378e-10	21	46496180	ADARB1	5'UTR-shore
cg06853455	female	0.113883	0.013342	1.38472e-15	5.16635e-10	12	113787113		IGR-opensea
cg26361533	female	-0.286803	0.0336061	1.39838e-15	5.21732e-10	12	2445561	CACNA1C	Body-opensea
cg12122737	female	0.162435	0.0190347	1.40443e-15	5.2399e-10	22	42065726		IGR-shelf
cg15733792	female	0.0734305	0.00860492	1.40505e-15	5.2422e-10	1	155935984	ARHGEF2	Body-opensea
cg14264571	female	0.0764729	0.00896242	1.4137e-15	5.27448e-10	9	35754691	MSMP	TSS1500-shelf
cg04650899	female	-0.115348	0.0135243	1.44924e-15	5.40707e-10	17	48194835	SAMD14	Body-island
cg14042143	female	0.144626	0.0169601	1.46414e-15	5.46267e-10	7	2646782	IQCE	Body-shore
cg19267457	female	0.239713	0.028121	1.49417e-15	5.57472e-10	1	64394702	ROR1	Body-opensea
cg02331025	female	0.107255	0.0125838	1.50516e-15	5.61572e-10	5	37835965	GDNF	TSS1500-shore
cg02479744	female	0.194167	0.0227816	1.50804e-15	5.62646e-10	6	16303089	ATXN1	3'UTR-opensea
cg26524347	female	0.154892	0.0181754	1.51682e-15	5.65924e-10	12	121738449		IGR-shelf
cg13354523	female	0.219727	0.0257834	1.5178e-15	5.66289e-10	12	10251574	CLEC1A	5'UTR-opensea
cg18246640	female	0.104973	0.0123206	1.53764e-15	5.7369e-10	10	112136000		IGR-opensea
cg13082816	female	0.123953	0.0145507	1.5517e-15	5.78937e-10	1	27702055	FCN3	TSS1500-opensea
cg09487931	female	-0.0590768	0.00693499	1.55204e-15	5.79062e-10	17	27230297	DHRS13	TSS1500-shore
cg20060080	female	0.0592935	0.00696095	1.55865e-15	5.81528e-10	15	44063940	PDIA3	3'UTR-opensea
cg17467525	female	-0.20172	0.0236855	1.57361e-15	5.87111e-10	1	9686523		IGR-shore
cg10997479	female	0.12891	0.0151396	1.59335e-15	5.94474e-10	3	62362924		IGR-island
cg06424065	female	0.245583	0.0288438	1.59864e-15	5.9645e-10	4	6247640		IGR-island
cg01796333	female	0.0963409	0.0113157	1.60209e-15	5.97736e-10	2	242034995	MTERFD2	Body-opensea
cg06086012	female	0.149796	0.0175954	1.60758e-15	5.99783e-10	3	170143582	CLDN11	Body-opensea
cg10202788	female	0.0899367	0.0105673	1.63489e-15	6.09975e-10	5	175900443	FAF2	Body-opensea
cg00757207	female	-0.182095	0.0213987	1.64906e-15	6.15259e-10	17	7456223	TNFSF12	Body-shelf
cg03182584	female	0.10691	0.0125651	1.66151e-15	6.19904e-10	7	36364854	KIAA0895	3'UTR-opensea
cg03037039	female	0.1821	0.0214037	1.66834e-15	6.22453e-10	4	16787920	LDB2	Body-opensea
cg15616511	female	0.124818	0.014671	1.66904e-15	6.22714e-10	11	45887415	CRY2	Body-opensea
cg03697308	female	0.160602	0.018888	1.72508e-15	6.43625e-10	13	28545566		IGR-shore
cg17614703	female	0.0835116	0.00982434	1.75256e-15	6.53875e-10	5	179218853		IGR-shelf
cg11222217	female	0.185555	0.0218411	1.8094e-15	6.75084e-10	1	10732519	CASZ1	Body-opensea
cg07834574	female	-0.233856	0.0275346	1.84009e-15	6.86532e-10	17	4802847	CHRNE	Body-island
cg03731202	female	-0.287513	0.0338596	1.86283e-15	6.95017e-10	1	36574795		IGR-opensea
cg03198029	female	0.0911447	0.0107362	1.88597e-15	7.03651e-10	2	128431385	LIMS2	Body-shore
cg07345999	female	0.165818	0.0195404	1.93144e-15	7.20616e-10	11	16632636		IGR-island
cg23870168	female	0.17222	0.0202984	1.9511e-15	7.2795e-10	2	240121206	HDAC4	Body-opensea
cg16097955	female	0.0522025	0.00615331	1.96093e-15	7.31619e-10	6	4905378	CDYL	Body-opensea
cg16151651	female	0.236997	0.0279401	1.97832e-15	7.38106e-10	2	1609119		IGR-opensea
cg21195185	female	-0.0805123	0.00949245	1.98634e-15	7.41101e-10	4	76555782	CDKL2	TSS200-island
cg09957391	female	-0.0212844	0.00250944	1.98646e-15	7.41143e-10	12	57984777	PIP4K2C	TSS200-island
cg15381162	female	0.0364154	0.00429408	2.00426e-15	7.47786e-10	14	23517736	CDH24	Body-island
cg19910937	female	-0.14529	0.0171333	2.00895e-15	7.49535e-10	4	128983807	LARP1B	5'UTR-shore
cg17045635	female	0.210233	0.0247992	2.04444e-15	7.62777e-10	10	80998130	ZMIZ1	Body-shelf
cg22790839	female	-0.251009	0.0296113	2.05268e-15	7.65852e-10	5	157883933		IGR-opensea
cg20431250	female	0.20302	0.0239515	2.05923e-15	7.68293e-10	6	108492653	NR2E1	Body-shore
cg20192747	female	0.177547	0.0209466	2.06149e-15	7.69136e-10	18	44774846		IGR-island
cg09036188	female	-0.220807	0.0260505	2.06188e-15	7.69282e-10	17	4802888	CHRNE	Body-island
cg22603393	female	0.0825863	0.00974689	2.10386e-15	7.84945e-10	1	39878781	KIAA0754	1stExon-shelf
cg05943655	female	-0.115947	0.0136855	2.11589e-15	7.89435e-10	6	43636172	RSPH9	Body-opensea
cg23605961	female	0.278537	0.032897	2.19204e-15	8.17844e-10	7	751331	PRKAR1B	5'UTR-shore
cg22698604	female	-0.0773411	0.00913516	2.20126e-15	8.21287e-10	10	116286502	ABLIM1	Body-opensea
cg25390658	female	-0.135448	0.0160005	2.21704e-15	8.27174e-10	7	134576216	CALD1	Body-opensea
cg05165862	female	0.139287	0.0164602	2.26437e-15	8.44833e-10	12	50030609	PRPF40B	Body-opensea
cg14196395	female	0.247533	0.0292599	2.29899e-15	8.57748e-10	2	71823517	DYSF	Body-opensea
cg06679494	female	-0.181402	0.0214496	2.34044e-15	8.73215e-10	17	6921295	MIR497	Body-shelf
cg04416734	female	-0.168966	0.01998	2.34573e-15	8.75186e-10	16	30075192	ALDOA	TSS1500-shore
cg27077950	female	0.17003	0.0201088	2.36577e-15	8.82664e-10	19	2724145		IGR-shore
cg01401534	female	0.118766	0.0140468	2.37344e-15	8.85525e-10	6	4079342	C6orf201	TSS200-island
cg18916060	female	0.117617	0.0139137	2.3993e-15	8.95174e-10	14	57266029		IGR-shore
cg10569694	female	-0.0537588	0.00636123	2.43751e-15	9.0943e-10	7	5013509	RNF216L	TSS200-island
cg00021933	female	0.0656382	0.00776755	2.44879e-15	9.13639e-10	1	86082316		IGR-shore
cg14162940	female	-0.159386	0.0188622	2.45353e-15	9.15406e-10	20	30605868	C20orf160	Body-island
cg03292206	female	0.127396	0.0150796	2.48242e-15	9.26186e-10	2	111424914	BUB1	Body-opensea
cg08899105	female	-0.253043	0.0299569	2.5053e-15	9.34721e-10	15	93450671	CHD2	Body-shelf
cg21239660	female	0.109934	0.013015	2.50805e-15	9.35748e-10	17	45006500	GOSR2	Body-opensea
cg12076102	female	0.137008	0.0162226	2.52787e-15	9.43144e-10	17	62084322	ICAM2	5'UTR-opensea
cg01494399	female	0.103819	0.0122969	2.57716e-15	9.61533e-10	16	81709890	CMIP	Body-shore
cg17583256	female	0.109877	0.0130153	2.58648e-15	9.6501e-10	22	19513008	CLDN5	TSS200-shore
cg01716252	female	0.0931446	0.0110341	2.59579e-15	9.68486e-10	21	46552605	ADARB1	5'UTR-shore
cg15946312	female	0.0935896	0.0110877	2.60739e-15	9.72813e-10	5	180646880		IGR-island
cg13607082	female	0.092877	0.0110034	2.61e-15	9.73786e-10	12	122652224	LRRC43	TSS200-opensea
cg11807829	female	-0.216242	0.0256244	2.64153e-15	9.8555e-10	4	54458109	LNX1	TSS1500-opensea
cg12134349	female	0.132333	0.0156846	2.67339e-15	9.97437e-10	8	142264816		IGR-shore
cg03433048	female	-0.223774	0.0265243	2.68365e-15	1.00126e-09	17	4806453	CHRNE	TSS200-shore
cg12180551	female	0.138594	0.0164279	2.68439e-15	1.00154e-09	1	56975583	PPAP2B	Body-opensea
cg11014073	female	0.0439703	0.00521384	2.74055e-15	1.02249e-09	12	64460951	SRGAP1	Body-opensea
cg04349420	female	-0.155644	0.0184571	2.75241e-15	1.02692e-09	8	49414279		IGR-opensea
cg14647944	female	0.135248	0.0160388	2.75657e-15	1.02847e-09	9	73095740		IGR-opensea
cg04628181	female	0.144404	0.017129	2.79563e-15	1.04304e-09	13	25250623		IGR-shelf
cg25781936	female	0.18221	0.0216188	2.8341e-15	1.0574e-09	6	138750887	NHSL1	Body-opensea
cg08309251	female	-0.162549	0.0192884	2.8536e-15	1.06467e-09	21	46348306	ITGB2	5'UTR-shelf
cg24444059	female	0.162223	0.0192529	2.88053e-15	1.07472e-09	9	35909412	LOC158376	TSS200-opensea
cg00820131	female	0.104299	0.0123816	2.92235e-15	1.09032e-09	X	67912078	STARD8	TSS1500-shore
cg05493356	female	-0.140685	0.0167019	2.9308e-15	1.09348e-09	17	79981909	STRA13	TSS1500-island
cg10424681	female	0.129101	0.0153308	2.97505e-15	1.10998e-09	6	4079350	C6orf201	TSS200-island
cg02947450	female	0.135778	0.0161331	3.07419e-15	1.14697e-09	10	22766861		IGR-island
cg24887265	female	0.22765	0.0270498	3.07742e-15	1.14818e-09	2	45233528	SIX2	Body-shore
cg12250807	female	0.242182	0.0287833	3.11823e-15	1.16341e-09	2	136598602	MCM6	Body-opensea
cg25671716	female	-0.0832617	0.0098957	3.11905e-15	1.16371e-09	12	96441714		IGR-opensea
cg10993460	female	0.123687	0.0147005	3.12084e-15	1.16438e-09	12	7276482	RBP5	3'UTR-opensea
cg16699818	female	0.110744	0.0131632	3.13423e-15	1.16937e-09	16	48479333		IGR-opensea
cg18266783	female	0.151895	0.0180587	3.1759e-15	1.18492e-09	1	156466729	MEF2D	5'UTR-shelf
cg03729251	female	0.135013	0.0160528	3.18955e-15	1.19002e-09	4	151501035	LRBA	Body-island
cg12279419	female	0.169994	0.0202158	3.22374e-15	1.20277e-09	6	33943662		IGR-island
cg26422458	female	0.232302	0.0276288	3.245e-15	1.2107e-09	1	79472452	ELTD1	5'UTR-island
cg06041695	female	0.152881	0.0181856	3.27272e-15	1.22105e-09	10	70863705	SRGN	Body-opensea
cg23430664	female	-0.0464669	0.00552809	3.29653e-15	1.22993e-09	17	48423021	XYLT2	TSS1500-island
cg19442900	female	0.132866	0.0158099	3.33138e-15	1.24293e-09	11	17226015		IGR-shelf
cg10258385	female	-0.112937	0.0134386	3.33404e-15	1.24392e-09	11	17410380	KCNJ11	TSS200-shore
cg27180994	female	0.0735711	0.00875447	3.33534e-15	1.24441e-09	7	43929080	URGCP	5'UTR-opensea
cg14265043	female	0.0895007	0.0106532	3.39134e-15	1.2653e-09	12	96643154	ELK3	Body-shore
cg04904784	female	0.201928	0.0240421	3.44501e-15	1.28533e-09	12	27170664		IGR-shelf
cg24936781	female	0.138635	0.0165062	3.44506e-15	1.28535e-09	4	143191281	INPP4B	Body-opensea
cg00014998	female	0.186345	0.0221885	3.46122e-15	1.29138e-09	2	177014962	HOXD4	TSS1500-island
cg16355771	female	0.206007	0.0245342	3.49567e-15	1.30423e-09	3	13242707		IGR-shelf
cg21178979	female	0.137037	0.0163214	3.50975e-15	1.30948e-09	7	1889533	MAD1L1	Body-shore
cg07865607	female	-0.149388	0.0177955	3.54356e-15	1.3221e-09	19	3136076	GNA15	TSS200-opensea
cg04431186	female	0.141074	0.01681	3.60204e-15	1.34391e-09	13	113614132		IGR-opensea
cg22400703	female	0.208294	0.0248224	3.62269e-15	1.35162e-09	2	68545995	CNRIP1	Body-shore
cg09126279	female	-0.232079	0.0276675	3.70097e-15	1.38082e-09	4	40675171		IGR-opensea
cg23838005	female	-0.252153	0.0300648	3.73011e-15	1.3917e-09	17	74868604	MGAT5B	Body-shore
cg02988755	female	0.12709	0.0151535	3.73399e-15	1.39314e-09	13	110918331	COL4A1	Body-island
cg08182501	female	0.149499	0.0178277	3.75874e-15	1.40238e-09	2	177003406		IGR-shore
cg25321114	female	0.0980436	0.0116927	3.77914e-15	1.40999e-09	11	67926276	SUV420H1	Body-opensea
cg17265115	female	0.158138	0.0188598	3.78115e-15	1.41074e-09	4	734692	PCGF3	Body-shelf
cg25520910	female	0.133846	0.015963	3.78493e-15	1.41215e-09	2	114576197		IGR-opensea
cg20701457	female	0.152867	0.0182318	3.78762e-15	1.41315e-09	17	62084342	ICAM2	5'UTR-opensea
cg06377684	female	0.122429	0.0146023	3.79944e-15	1.41756e-09	1	10700647	CASZ1	Body-shore
cg03599078	female	0.157523	0.0187884	3.8024e-15	1.41867e-09	10	8078314		IGR-island
cg22442352	female	0.108769	0.0129759	3.84399e-15	1.43419e-09	5	149227361		IGR-opensea
cg18563886	female	-0.162786	0.0194229	3.87631e-15	1.44625e-09	10	135203102	PAOX	Body-island
cg10592734	female	-0.205275	0.0244936	3.8869e-15	1.45019e-09	7	139570596	TBXAS1	Body-opensea
cg00806138	female	0.162917	0.0194401	3.89473e-15	1.45312e-09	1	47881404	FOXE3	TSS1500-shore
cg03896661	female	-0.0345469	0.00412246	3.90236e-15	1.45596e-09	2	197036775	STK17B	TSS1500-shore
cg10788213	female	0.0634716	0.00757412	3.9049e-15	1.45691e-09	22	45719176	FAM118A	Body-opensea
cg23279833	female	0.142301	0.0169814	3.9104e-15	1.45896e-09	17	74141401	RNF157	Body-shelf
cg21686386	female	0.18446	0.0220142	3.92959e-15	1.46612e-09	1	222614476		IGR-opensea
cg17578639	female	-0.235511	0.0281101	3.95436e-15	1.47537e-09	3	176862949	TBL1XR1	5'UTR-opensea
cg04360793	female	0.264166	0.0315335	3.97629e-15	1.48354e-09	1	79472361	ELTD1	5'UTR-island
cg17501395	female	-0.322934	0.0385532	4.00296e-15	1.4935e-09	6	149806331	ZC3H12D	TSS200-opensea
cg15068180	female	0.0905917	0.0108164	4.02754e-15	1.50267e-09	3	194017703		IGR-shelf
cg05514299	female	-0.288175	0.0344078	4.03039e-15	1.50373e-09	17	74868670	MGAT5B	Body-shelf
cg02404349	female	0.165958	0.0198168	4.04869e-15	1.51056e-09	15	60862256	RORA	Body-opensea
cg14314744	female	0.17194	0.0205328	4.06623e-15	1.5171e-09	6	100897445	SIM1	Body-island
cg25389463	female	-0.12607	0.0150568	4.09368e-15	1.52734e-09	1	235325040	RBM34	TSS1500-shore
cg21300072	female	-0.119758	0.0143034	4.09924e-15	1.52942e-09	12	12850082	GPR19	TSS1500-shore
cg24472867	female	0.0959037	0.0114544	4.10206e-15	1.53047e-09	8	144561585	ZC3H3	Body-shelf
cg23452969	female	-0.275574	0.0329231	4.16698e-15	1.55469e-09	11	62691182		IGR-island
cg01298102	female	-0.185173	0.0221233	4.17373e-15	1.55721e-09	16	21199840		IGR-opensea
cg02098786	female	-0.157073	0.0187662	4.175e-15	1.55768e-09	14	24801794	ADCY4	Body-island
cg14189782	female	-0.0873993	0.0104445	4.22967e-15	1.57808e-09	11	65342283	EHBP1L1	TSS1500-island
cg26407544	female	0.144473	0.0172698	4.29737e-15	1.60334e-09	1	20945355	CDA	3'UTR-opensea
cg02672759	female	0.19166	0.0229111	4.30368e-15	1.6057e-09	19	39739058		IGR-island
cg13081009	female	0.269613	0.0322328	4.32751e-15	1.61459e-09	1	8430745	RERE	5'UTR-opensea
cg06236573	female	0.0563188	0.00673479	4.39017e-15	1.63796e-09	10	100007832	LOXL4	3'UTR-opensea
cg12595013	female	0.193175	0.0231041	4.42819e-15	1.65215e-09	3	147128123	ZIC1	1stExon-island
cg22797031	female	0.25315	0.030287	4.50763e-15	1.68179e-09	1	170630070		IGR-shore
cg18527651	female	-0.177563	0.0212444	4.51587e-15	1.68486e-09	3	10284280	IRAK2	3'UTR-opensea
cg19993316	female	-0.0804503	0.00962597	4.53035e-15	1.69027e-09	15	69452462	MIR548H4	Body-island
cg03623878	female	-0.171259	0.0204937	4.55905e-15	1.70097e-09	13	113655560	MCF2L	Body-shore
cg23178186	female	0.133876	0.0160252	4.63703e-15	1.73007e-09	11	1321213	TOLLIP	Body-opensea
cg12591951	female	0.148559	0.0177843	4.65944e-15	1.73843e-09	17	48113764		IGR-opensea
cg19034132	female	-0.236111	0.028269	4.69338e-15	1.75109e-09	10	75692227		IGR-opensea
cg07180538	female	0.209625	0.0250984	4.69866e-15	1.75306e-09	7	4786899	FOXK1	Body-island
cg09417568	female	-0.0212551	0.00254522	4.73447e-15	1.76642e-09	9	99328811	CDC14B	Body-island
cg11213690	female	0.184591	0.0221074	4.77312e-15	1.78084e-09	7	149112402		IGR-island
cg03240232	female	0.097004	0.0116184	4.79201e-15	1.78789e-09	12	113448327	OAS2	3'UTR-opensea
cg03504160	female	0.0937557	0.0112324	4.8649e-15	1.81509e-09	4	6659194		IGR-shore
cg00971110	female	0.1675	0.0200697	4.89531e-15	1.82643e-09	7	84814140		IGR-shore
cg04477010	female	0.110025	0.0131839	4.91138e-15	1.83243e-09	8	38175544	WHSC1L1	Body-opensea
cg13502125	female	0.213876	0.0256285	4.91746e-15	1.83469e-09	1	147826191		IGR-island
cg22358236	female	-0.23566	0.0282433	4.96034e-15	1.85069e-09	11	62691452		IGR-island
cg26363634	female	-0.04028	0.0048276	4.96754e-15	1.85338e-09	1	110162485	AMPD2	1stExon-island
cg18675097	female	0.190176	0.0227971	5.01938e-15	1.87272e-09	6	28227127	NKAPL	5'UTR-island
cg14950344	female	0.126751	0.015195	5.03714e-15	1.87935e-09	17	44810162	NSF	Body-opensea
cg01701649	female	0.280288	0.0336078	5.09128e-15	1.89955e-09	16	48589954	N4BP1	Body-opensea
cg01792616	female	0.107973	0.0129475	5.11448e-15	1.9082e-09	16	4289562	SRL	Body-opensea
cg21561712	female	0.131044	0.0157161	5.15194e-15	1.92218e-09	11	118895504	SLC37A4	3'UTR-opensea
cg06495961	female	0.270266	0.0324222	5.23278e-15	1.95234e-09	7	153584582	DPP6	1stExon-island
cg20908740	female	0.0586853	0.00704022	5.23667e-15	1.95379e-09	13	113631743	MCF2L	Body-shelf
cg11326574	female	-0.168272	0.020188	5.25235e-15	1.95964e-09	12	59271109	LRIG3	Body-opensea
cg24506767	female	-0.0528748	0.00634381	5.26642e-15	1.96489e-09	6	52264762	PAQR8	5'UTR-shelf
cg01027937	female	-0.0903887	0.0108452	5.28042e-15	1.97011e-09	4	74486080	RASSF6	1stExon-island
cg03572260	female	0.135138	0.0162156	5.30155e-15	1.978e-09	17	37808339	STARD3	5'UTR-opensea
cg03551243	female	-0.044189	0.00530257	5.31352e-15	1.98246e-09	19	5718912	LONP1	Body-shore
cg04223420	female	0.177554	0.0213072	5.32876e-15	1.98815e-09	5	134363877	PITX1	3'UTR-island
cg02843158	female	0.0896293	0.0107586	5.40371e-15	2.01611e-09	16	66575847	TK2	Body-opensea
cg00156001	female	0.0705816	0.00847634	5.55118e-15	2.07113e-09	22	50195025	BRD1	Body-shore
cg16550282	female	-0.0307497	0.00369296	5.56225e-15	2.07526e-09	14	24657526	IPO4	Body-shore
cg00346985	female	0.144863	0.0173988	5.58323e-15	2.08309e-09	1	46940516		IGR-shore
cg03332546	female	0.262638	0.0315466	5.60587e-15	2.09154e-09	19	16553887	EPS15L1	Body-opensea
cg19532939	female	0.169972	0.0204182	5.63817e-15	2.10359e-09	12	14996525	ART4	TSS200-opensea
cg16391955	female	0.209347	0.0251494	5.65401e-15	2.1095e-09	1	50881185		IGR-island
cg17160439	female	0.148326	0.0178267	5.79232e-15	2.1611e-09	11	64815744	NAALADL1	Body-shore
cg13458609	female	0.206439	0.0248196	5.90336e-15	2.20253e-09	9	130608923	ENG	Body-opensea
cg25656762	female	0.21984	0.0264338	5.94052e-15	2.2164e-09	5	60927728		IGR-opensea
cg25755851	female	-0.187584	0.0225663	6.10117e-15	2.27634e-09	1	9335794		IGR-opensea
cg06806158	female	0.125931	0.0151498	6.10744e-15	2.27867e-09	6	166905187	RPS6KA2	Body-opensea
cg20995304	female	0.147986	0.0178044	6.13412e-15	2.28863e-09	12	48196167	HDAC7	Body-opensea
cg12459514	female	0.0705487	0.00849186	6.29655e-15	2.34923e-09	2	23914071	KLHL29	Body-shore
cg13912849	female	0.0913946	0.0110011	6.29836e-15	2.34991e-09	3	56762402	ARHGEF3	3'UTR-opensea
cg23892924	female	0.0843415	0.0101525	6.3093e-15	2.35399e-09	2	46909601		IGR-opensea
cg25850044	female	-0.158854	0.0191246	6.36088e-15	2.37323e-09	15	31507705		IGR-shore
cg23881299	female	0.11874	0.0142979	6.42568e-15	2.39741e-09	10	121116990	GRK5	Body-opensea
cg07974511	female	0.201052	0.0242117	6.46111e-15	2.41063e-09	2	63283013	OTX1	Body-island
cg16608267	female	0.0889012	0.0107075	6.51091e-15	2.42921e-09	12	129252745		IGR-opensea
cg24634746	female	0.177999	0.0214487	6.68122e-15	2.49275e-09	1	7538723	CAMTA1	Body-opensea
cg18280830	female	0.153621	0.0185119	6.69486e-15	2.49784e-09	14	57265875		IGR-shore
cg02130107	female	-0.135641	0.0163454	6.69776e-15	2.49892e-09	16	29828598	C16orf53	Body-shore
cg27532171	female	0.10055	0.0121186	6.75243e-15	2.51932e-09	1	46952054		IGR-shore
cg05973398	female	-0.247636	0.0298499	6.80428e-15	2.53866e-09	21	36420164	RUNX1	Body-opensea
cg20309677	female	0.155172	0.0187086	6.89133e-15	2.57114e-09	1	116925753	ATP1A1	TSS1500-opensea
cg07338984	female	0.0211073	0.00254492	6.90173e-15	2.57502e-09	12	48194303	HDAC7	Body-opensea
cg26517878	female	0.044635	0.00538255	6.96339e-15	2.59803e-09	7	158589603	ESYT2	Body-opensea
cg07145683	female	-0.0852472	0.0102805	6.98138e-15	2.60474e-09	12	53297443	KRT8	Body-island
cg13396738	female	-0.107337	0.012945	6.99741e-15	2.61072e-09	6	30850718	DDR1	TSS1500-shore
cg00253681	female	0.123355	0.014892	7.40162e-15	2.76153e-09	12	14996583	ART4	TSS200-opensea
cg19295314	female	0.153007	0.0184718	7.40189e-15	2.76163e-09	6	1635640	GMDS	Body-opensea
cg17319576	female	-0.0698856	0.00843697	7.40241e-15	2.76183e-09	1	86047239	CYR61	Body-island
cg10490888	female	0.178181	0.0215136	7.45281e-15	2.78063e-09	11	1472610	BRSK2	Body-shore
cg08348422	female	0.130543	0.0157731	7.74865e-15	2.891e-09	2	236935654	AGAP1	Body-opensea
cg02578944	female	0.144128	0.0174248	8.00068e-15	2.98504e-09	6	28227392	NKAPL	1stExon-island
cg04554564	female	0.112306	0.0135776	8.00121e-15	2.98523e-09	17	19990302	CYTSB	TSS200-opensea
cg15174623	female	0.105868	0.0128002	8.03338e-15	2.99724e-09	7	35494345		IGR-island
cg15224059	female	0.183558	0.0221957	8.07832e-15	3.01401e-09	5	125684670		IGR-opensea
cg02073763	female	-0.106043	0.0128229	8.09014e-15	3.01841e-09	2	46064034	PRKCE	Body-opensea
cg25375029	female	0.0798064	0.00965073	8.10587e-15	3.02428e-09	1	244820484	PPPDE1	Body-shelf
cg23811057	female	-0.191654	0.0231793	8.1655e-15	3.04653e-09	1	234908514		IGR-opensea
cg17942750	female	0.170976	0.020684	8.28638e-15	3.09163e-09	9	140683527	EHMT1	Body-island
cg26698460	female	0.178018	0.0215368	8.30783e-15	3.09963e-09	19	58716004	ZNF274	Body-island
cg00455523	female	0.191466	0.0231656	8.34062e-15	3.11187e-09	10	7614151	ITIH5	Body-opensea
cg26837962	female	0.281453	0.0340543	8.35824e-15	3.11844e-09	16	15613108	C16orf45	Body-opensea
cg14164262	female	0.172378	0.020857	8.36208e-15	3.11988e-09	9	139659038	LCN15	TSS200-shelf
cg27132471	female	-0.31306	0.0378802	8.37677e-15	3.12536e-09	15	92613280	SLCO3A1	Body-opensea
cg01976810	female	0.102192	0.0123653	8.37826e-15	3.12591e-09	17	751709	NXN	Body-opensea
cg23633856	female	0.185046	0.0223941	8.45137e-15	3.15319e-09	1	170636363	PRRX1	Body-shelf
cg24553417	female	0.223598	0.027067	8.57494e-15	3.19929e-09	13	50244794	EBPL	Body-opensea
cg25969122	female	-0.230984	0.0279693	8.71309e-15	3.25084e-09	11	119630362		IGR-opensea
cg13112407	female	-0.149171	0.018067	8.82586e-15	3.29291e-09	2	97204931	ARID5A	Body-shore
cg14031054	female	0.258136	0.0312655	8.84237e-15	3.29907e-09	1	164681652	PBX1	Body-opensea
cg20847580	female	0.100795	0.0122094	8.88604e-15	3.31536e-09	6	41528750	FOXP4	5'UTR-island
cg20499290	female	0.151316	0.0183338	9.01123e-15	3.36207e-09	10	38015579		IGR-opensea
cg05991401	female	0.124324	0.0150646	9.05014e-15	3.37659e-09	17	72741152	RAB37	Body-shelf
cg03410115	female	0.0728752	0.00883055	9.0556e-15	3.37863e-09	16	29989187	TAOK2	Body-shelf
cg27015332	female	0.0859416	0.0104152	9.11817e-15	3.40197e-09	12	89479076		IGR-opensea
cg03676298	female	0.117163	0.0142045	9.31632e-15	3.4759e-09	3	48078103	MAP4	5'UTR-opensea
cg21486834	female	-0.124817	0.015133	9.33398e-15	3.48249e-09	17	74477542	RHBDF2	Body-shelf
cg19426522	female	0.15224	0.0184589	9.36539e-15	3.49421e-09	3	27766009		IGR-shore
cg22167515	female	0.194767	0.0236182	9.42688e-15	3.51715e-09	1	91192466		IGR-island
cg04179940	female	-0.0530032	0.00642823	9.49683e-15	3.54325e-09	20	33871836	EIF6	Body-shore
cg26172211	female	0.0540335	0.00655423	9.57912e-15	3.57395e-09	17	79170494	AZI1	Body-opensea
cg01856384	female	0.166373	0.0201843	9.66735e-15	3.60687e-09	6	41376904		IGR-island
cg27102864	female	-0.19907	0.0241532	9.71288e-15	3.62386e-09	16	58535418	NDRG4	Body-island
cg18650367	female	-0.20371	0.0247163	9.71677e-15	3.62531e-09	10	133909949		IGR-opensea
cg21338225	female	0.261915	0.0317826	9.78548e-15	3.65094e-09	7	30179748	C7orf41	Body-shelf
cg12513140	female	0.0915233	0.0111071	9.83479e-15	3.66934e-09	3	150160121	TSC22D2	Body-opensea
cg24680129	female	-0.185115	0.0224707	9.96514e-15	3.71797e-09	12	13318625		IGR-opensea
cg04503570	female	0.102279	0.0124155	9.96973e-15	3.71969e-09	1	226897117	ITPKB	Body-opensea
cg11580897	female	0.0860337	0.010445	1.00448e-14	3.74768e-09	1	23879671		IGR-shore
cg09321403	female	0.166187	0.0201774	1.00801e-14	3.76088e-09	6	13555624		IGR-opensea
cg13424940	female	0.115141	0.0139817	1.01599e-14	3.79065e-09	9	136844397	VAV2	Body-shore
cg18770579	female	0.118117	0.0143438	1.01871e-14	3.80077e-09	19	50191342	C19orf76	TSS1500-island
cg08913523	female	-0.213954	0.0259836	1.0222e-14	3.8138e-09	8	126649807		IGR-opensea
cg07904452	female	-0.361083	0.0438549	1.02623e-14	3.82885e-09	6	22892738		IGR-opensea
cg03315649	female	0.1044	0.0126835	1.04286e-14	3.89088e-09	19	5093541	KDM4B	Body-island
cg21599748	female	0.155342	0.0188791	1.06287e-14	3.96554e-09	15	41211285		IGR-opensea
cg02311364	female	0.0973504	0.0118328	1.0705e-14	3.99402e-09	3	13001256	IQSEC1	Body-opensea
cg10048215	female	0.117172	0.0142443	1.07965e-14	4.02815e-09	12	12938383	APOLD1	Body-shore
cg24338833	female	-0.251705	0.0306007	1.08248e-14	4.0387e-09	8	10592227		IGR-shore
cg27526774	female	-0.378333	0.0459976	1.08531e-14	4.04926e-09	1	235099089		IGR-opensea
cg25899829	female	0.185214	0.0225236	1.09923e-14	4.10122e-09	11	75046147	ARRB1	Body-opensea
cg19077854	female	0.0860332	0.0104627	1.10128e-14	4.10885e-09	5	122220652	SNX24	Body-opensea
cg25537125	female	0.0894472	0.0108804	1.1147e-14	4.15893e-09	2	108993602	SULT1C4	TSS1500-opensea
cg17934365	female	0.0349761	0.00425491	1.12058e-14	4.18088e-09	17	75180216	SEC14L1	Body-opensea
cg26333618	female	0.176292	0.0214469	1.12235e-14	4.18748e-09	12	48336655		IGR-opensea
cg08279097	female	0.110982	0.0135048	1.13711e-14	4.24253e-09	1	114455336	DCLRE1B	3'UTR-opensea
cg25948445	female	-0.287607	0.0349995	1.14091e-14	4.25671e-09	5	154140801	LARP1	Body-shelf
cg13832290	female	-0.116941	0.0142322	1.14669e-14	4.27828e-09	9	35649906	SIT1	Body-shelf
cg20489228	female	-0.203212	0.024736	1.15732e-14	4.31794e-09	12	115125549		IGR-shore
cg17775765	female	0.111948	0.0136273	1.15942e-14	4.32578e-09	13	95354021		IGR-shore
cg03362667	female	0.0926503	0.011279	1.1636e-14	4.34138e-09	15	85928046	AKAP13	5'UTR-shelf
cg05799411	female	0.0633889	0.00771842	1.17705e-14	4.39156e-09	1	52820497	CC2D1B	Body-opensea
cg00168191	female	0.164049	0.0199757	1.17868e-14	4.39764e-09	19	3097565	GNA11	Body-island
cg05572417	female	0.274383	0.0334111	1.17991e-14	4.40222e-09	13	113637815	MCF2L	Body-shore
cg16326902	female	0.159187	0.0193854	1.18465e-14	4.4199e-09	20	49253364	FAM65C	1stExon-opensea
cg08577743	female	-0.0540053	0.00657834	1.20134e-14	4.48216e-09	9	38621011	C9orf122	TSS200-island
cg03548645	female	0.0516665	0.00629398	1.2068e-14	4.50254e-09	14	103369816	TRAF3	Body-opensea
cg16500018	female	-0.0277991	0.00338663	1.20989e-14	4.51407e-09	19	7702178	STXBP2	Body-island
cg11009596	female	-0.0389817	0.00474916	1.21266e-14	4.5244e-09	17	8113758	AURKB	5'UTR-island
cg12544191	female	0.157316	0.0191662	1.21399e-14	4.52938e-09	5	172671754		IGR-island
cg27663938	female	0.224325	0.0273367	1.22974e-14	4.58815e-09	12	103696381	C12orf42	Body-island
cg26828664	female	0.152296	0.0185592	1.23006e-14	4.58934e-09	7	736945	PRKAR1B	Body-opensea
cg11790673	female	-0.213367	0.0260016	1.23018e-14	4.58979e-09	1	212845129		IGR-opensea
cg03585912	female	0.167785	0.0204492	1.238e-14	4.61894e-09	6	10385776		IGR-shore
cg02865033	female	0.106969	0.0130413	1.25948e-14	4.69909e-09	16	31235535	TRIM72	Body-island
cg10460946	female	-0.114067	0.0139095	1.27379e-14	4.75249e-09	17	76247467		IGR-shelf
cg03270167	female	-0.0892071	0.0108812	1.29385e-14	4.82732e-09	2	238768916	RAMP1	Body-shore
cg25483003	female	-0.103591	0.0126377	1.30467e-14	4.86769e-09	9	139948856	ENTPD2	TSS1500-island
cg20163796	female	0.0898778	0.0109663	1.31466e-14	4.90499e-09	1	202287239	LGR6	Body-opensea
cg15205441	female	0.153349	0.0187108	1.31537e-14	4.90763e-09	10	126782357	CTBP2	5'UTR-opensea
cg09296270	female	-0.129599	0.0158133	1.31669e-14	4.91254e-09	2	65087288		IGR-shore
cg01568244	female	-0.111622	0.0136201	1.31815e-14	4.918e-09	16	67218584	KIAA0895L	TSS1500-island
cg07617283	female	0.108915	0.0132902	1.32056e-14	4.92699e-09	7	127913660		IGR-shore
cg19550914	female	0.123079	0.0150204	1.32925e-14	4.95942e-09	3	52084505	DUSP7	3'UTR-opensea
cg11394947	female	0.138399	0.0168903	1.33012e-14	4.96267e-09	1	19074199	PAX7	3'UTR-opensea
cg26164710	female	0.156922	0.019155	1.34598e-14	5.02184e-09	1	15348264	KIAA1026	Body-opensea
cg05287372	female	0.0819244	0.0100011	1.35219e-14	5.04498e-09	3	69058876	C3orf64	Body-shelf
cg08684565	female	-0.0279139	0.00340772	1.35361e-14	5.05028e-09	7	135347028	PL-5283	TSS200-shore
cg26829990	female	0.0531498	0.00648862	1.35463e-14	5.05408e-09	12	110309563	GLTP	Body-opensea
cg27293155	female	0.0652129	0.00796161	1.35739e-14	5.06441e-09	2	38044012		IGR-opensea
cg17934775	female	-0.178844	0.0218391	1.3728e-14	5.12188e-09	15	93450129	CHD2	Body-shelf
cg19760241	female	0.246186	0.030063	1.37454e-14	5.12837e-09	17	35300010	LHX1	Body-island
cg00648184	female	0.141231	0.017249	1.38558e-14	5.16958e-09	17	60828157	2024-03-10	Body-opensea
cg01919401	female	0.171364	0.0209321	1.39575e-14	5.2075e-09	7	130985828	MKLN1	Body-opensea
cg21662156	female	0.088498	0.0108103	1.39747e-14	5.21393e-09	3	196753119	MFI2	Body-shore
cg18416503	female	0.10971	0.0134053	1.42001e-14	5.29802e-09	14	93475974	ITPK1	Body-opensea
cg13604166	female	0.19976	0.0244116	1.42978e-14	5.33447e-09	3	133811326		IGR-opensea
cg15108890	female	0.0928387	0.0113454	1.43046e-14	5.33704e-09	17	14111644	COX10	3'UTR-shore
cg15945999	female	-0.208293	0.025458	1.44057e-14	5.37473e-09	11	65355408	EHBP1L1	Body-shelf
cg08375234	female	0.202775	0.0247846	1.44398e-14	5.38746e-09	6	169274118		IGR-opensea
cg10981894	female	0.0850877	0.0104004	1.44691e-14	5.39838e-09	6	32085379	ATF6B	Body-opensea
cg02504211	female	-0.15845	0.0193679	1.44821e-14	5.40323e-09	3	194815434	C3orf21	Body-opensea
cg14497673	female	-0.0247005	0.00301943	1.45303e-14	5.42123e-09	5	49737349	EMB	TSS200-shore
cg03314644	female	-0.0217478	0.00265857	1.45525e-14	5.42949e-09	14	31890001		IGR-island
cg13476932	female	0.101725	0.0124386	1.47602e-14	5.50701e-09	1	6260373	RPL22	TSS1500-shore
cg00305585	female	0.111036	0.0135781	1.48119e-14	5.5263e-09	16	1610898	IFT140	Body-opensea
cg13376158	female	-0.0598504	0.00732012	1.49515e-14	5.57837e-09	17	73128023	NT5C	TSS200-shore
cg04539111	female	0.153586	0.0187857	1.4996e-14	5.59499e-09	16	67997858	SLC12A4	Body-opensea
cg09627520	female	0.159136	0.0194653	1.50297e-14	5.60754e-09	3	58410836	PXK	3'UTR-opensea
cg11428546	female	0.243009	0.0297257	1.50606e-14	5.61906e-09	2	100723110	AFF3	TSS1500-shelf
cg21182694	female	-0.0638145	0.00780657	1.51173e-14	5.64024e-09	3	139062771	MRPS22	TSS200-shore
cg22060367	female	0.0683403	0.00836101	1.51941e-14	5.66888e-09	2	161957720		IGR-opensea
cg16422365	female	-0.162407	0.0198709	1.52503e-14	5.68987e-09	14	106041833		IGR-shore
cg26824709	female	-0.195245	0.0238979	1.55685e-14	5.80858e-09	5	159740383	CCNJL	TSS1500-shore
cg24951100	female	-0.229492	0.0280902	1.55824e-14	5.81377e-09	10	13760075	FRMD4A	Body-opensea
cg19867917	female	0.187856	0.0230009	1.58373e-14	5.90885e-09	2	3642629	COLEC11	TSS200-island
cg18270675	female	0.139332	0.0170616	1.59379e-14	5.94642e-09	11	85422118	SYTL2	Body-opensea
cg14461974	female	0.0950717	0.0116508	1.66046e-14	6.19513e-09	2	3318039	TSSC1	Body-shore
cg05229649	female	0.0427097	0.00523444	1.66851e-14	6.2252e-09	10	102765404	LZTS2	Body-island
cg10301695	female	0.118825	0.0145639	1.67362e-14	6.24426e-09	12	6233717	VWF	1stExon-opensea
cg07018857	female	0.15075	0.0184793	1.68598e-14	6.29036e-09	2	239834442		IGR-opensea
cg08202226	female	-0.271163	0.033251	1.71659e-14	6.40455e-09	1	153896590	GATAD2B	TSS1500-shore
cg22462235	female	0.143328	0.0175771	1.72524e-14	6.43685e-09	1	226129481	LEFTY2	TSS1500-shore
cg19645616	female	0.175032	0.021471	1.75059e-14	6.53143e-09	19	10444917	RAVER1	TSS1500-island
cg06383241	female	-0.23348	0.0286448	1.76352e-14	6.57966e-09	12	116997022	MAP1LC3B2	TSS200-opensea
cg22522066	female	-0.0538932	0.00661219	1.76705e-14	6.59285e-09	19	38754726	SPINT2	TSS1500-shore
cg19265143	female	-0.0240824	0.00295471	1.76794e-14	6.59615e-09	1	28907637	SNHG12	Body-shore
cg21401642	female	0.155763	0.019111	1.76887e-14	6.59962e-09	4	174421114		IGR-shore
cg02174359	female	-0.137418	0.0168628	1.78322e-14	6.65315e-09	6	43654967	MRPS18A	Body-shore
cg00225067	female	0.0460672	0.00565342	1.79068e-14	6.68098e-09	3	45647141	LIMD1	Body-opensea
cg23832497	female	-0.245991	0.0301898	1.79524e-14	6.698e-09	6	121655383	C6orf170	Body-shore
cg05343689	female	0.133129	0.0163406	1.80747e-14	6.74364e-09	11	75852437	UVRAG	Body-opensea
cg03971808	female	0.162703	0.0199725	1.81636e-14	6.77679e-09	4	3322833	RGS12	Body-shelf
cg21628794	female	0.111111	0.0136394	1.81711e-14	6.77959e-09	11	66631894	PC	Body-shore
cg21488279	female	0.109202	0.0134065	1.82741e-14	6.81804e-09	5	122434178	PRDM6	Body-island
cg09085792	female	0.114784	0.0140921	1.82932e-14	6.82516e-09	3	189547290	TP63	Body-opensea
cg19956147	female	0.158607	0.0194735	1.8356e-14	6.8486e-09	17	800431	NXN	Body-opensea
cg13177786	female	-0.055489	0.00681309	1.83879e-14	6.86051e-09	11	10472099	AMPD3	TSS200-island
cg23738647	female	0.191283	0.0234888	1.84929e-14	6.89966e-09	1	3319509	PRDM16	Body-shore
cg25365006	female	0.0965321	0.0118551	1.86045e-14	6.94128e-09	3	125820752	SLC41A3	TSS1500-opensea
cg14803306	female	-0.0310461	0.00381311	1.86947e-14	6.97495e-09	2	47499716		IGR-island
cg19287349	female	0.153723	0.0188815	1.87528e-14	6.99663e-09	15	63358260	TPM1	3'UTR-opensea
cg05804170	female	0.182819	0.0224567	1.88118e-14	7.01863e-09	1	3121514	PRDM16	Body-opensea
cg06280210	female	-0.0924756	0.0113596	1.88447e-14	7.0309e-09	7	26331247	SNX10	TSS1500-shore
cg08357990	female	-0.162163	0.01992	1.88447e-14	7.03094e-09	2	33359550	LTBP1	TSS200-opensea
cg07594833	female	0.0897028	0.0110198	1.8914e-14	7.05677e-09	7	73919889	GTF2IRD1	5'UTR-opensea
cg01016847	female	0.0867335	0.0106552	1.89288e-14	7.06231e-09	14	23303413	MRPL52	Body-shelf
cg21151287	female	0.0500078	0.00614443	1.9091e-14	7.1228e-09	5	14488003	TRIO	Body-island
cg11405655	female	-0.147008	0.0180645	1.91904e-14	7.1599e-09	1	999599		IGR-shore
cg26083752	female	0.0455133	0.00559282	1.92074e-14	7.16623e-09	11	10590587	LYVE1	TSS1500-opensea
cg12196901	female	0.133078	0.0163549	1.93245e-14	7.20993e-09	17	26630081	FLJ40504	Body-shelf
cg18988498	female	0.189093	0.0232405	1.93898e-14	7.23431e-09	11	31824262	PAX6	Body-shore
cg12764034	female	0.229911	0.0282579	1.94144e-14	7.24346e-09	1	75602846	LHX8	Body-island
cg10472919	female	0.203941	0.0250771	1.98749e-14	7.41527e-09	5	135266805	FBXL21	5'UTR-shore
cg06307176	female	0.0767613	0.00944003	2.00157e-14	7.4678e-09	5	131281290		IGR-island
cg21052656	female	-0.235074	0.0289134	2.01755e-14	7.52742e-09	11	67250046	AIP	TSS1500-shore
cg11049075	female	0.192077	0.0236268	2.02606e-14	7.55918e-09	17	42199063	HDAC5	5'UTR-shore
cg07783183	female	0.0804281	0.00989325	2.02627e-14	7.55999e-09	11	75852355	UVRAG	Body-opensea
cg19714985	female	0.20178	0.0248242	2.04287e-14	7.62191e-09	10	77043608		IGR-opensea
cg17271223	female	0.100173	0.0123247	2.05032e-14	7.6497e-09	7	132957775	EXOC4	Body-opensea
cg16340152	female	0.0906289	0.0111515	2.05985e-14	7.68527e-09	8	81789991		IGR-shelf
cg16483490	female	-0.051931	0.00639128	2.08387e-14	7.77487e-09	2	111879711	BCL2L11	5'UTR-island
cg02892577	female	0.129828	0.0159831	2.11713e-14	7.89897e-09	10	121181759	GRK5	Body-opensea
cg13695933	female	0.0945569	0.011641	2.11904e-14	7.90609e-09	9	35539509	RUSC2	5'UTR-opensea
cg06936290	female	-0.279833	0.0344511	2.12042e-14	7.91125e-09	7	13889871		IGR-opensea
cg14016236	female	0.199274	0.0245525	2.2108e-14	8.24847e-09	3	171792545	FNDC3B	5'UTR-opensea
cg12451671	female	0.183371	0.0225949	2.22009e-14	8.28313e-09	6	16303162	ATXN1	3'UTR-opensea
cg20648979	female	0.128424	0.0158259	2.2319e-14	8.32716e-09	7	4287171	SDK1	Body-opensea
[truncated: 12,741 more rows]

## Sheet: LUSC
CpG	sex	meanDiff	ses	pval	bonf	CHR	MAPINFO	gene	feat.cgi
cg09325711	female	-0.244407	0.0116678	2.14678e-38	8.20256e-33	7	39662764	RALA	TSS1500-island
cg18710162	female	-0.166538	0.00870133	3.03286e-35	1.15882e-29	17	33390808	RFFL	TSS200-opensea
cg13531667	female	-0.349894	0.0188899	3.94336e-34	1.50671e-28	5	112825132	MCC	TSS1500-shore
cg25750259	female	-0.168663	0.00913903	5.23862e-34	2.00161e-28	20	43104962	TTPAL	5'UTR-shore
cg26084949	female	-0.259747	0.0147949	2.42011e-32	9.24694e-27	14	75039090	LTBP2	Body-opensea
cg14381919	female	-0.24587	0.0145603	4.50785e-31	1.72239e-25	11	12701969	TEAD1	5'UTR-opensea
cg01839430	female	-0.259666	0.0154497	6.38952e-31	2.44135e-25	2	216177098	ATIC	Body-island
cg08113562	female	-0.208873	0.0124555	7.54842e-31	2.88415e-25	17	43508428	SH3D20	5'UTR-island
cg02174232	female	-0.219166	0.0134602	6.59836e-30	2.52115e-24	3	49712164	APEH	Body-island
cg13382100	female	-0.153552	0.00984762	1.49706e-28	5.72008e-23	12	132414849	PUS1	Body-shore
cg26026748	female	-0.368904	0.0238917	3.00511e-28	1.14821e-22	1	164629875	PBX1	Body-opensea
cg01383890	female	-0.140839	0.00918857	5.05071e-28	1.92981e-22	15	62358982	C2CD4A	TSS200-shore
cg04834502	female	-0.170914	0.011304	1.31831e-27	5.03708e-22	16	48644360	N4BP1	TSS1500-shore
cg09496762	female	-0.138881	0.00925957	2.31119e-27	8.83077e-22	20	42286524		IGR-island
cg19591623	female	0.16387	0.0109412	2.55124e-27	9.74797e-22	19	311981	MIER2	Body-island
cg01772014	female	-0.246528	0.016547	3.67898e-27	1.40569e-21	20	30606095	C20orf160	Body-shore
cg04291025	female	-0.208954	0.0141224	5.93884e-27	2.26915e-21	15	69746140	RPLP1	Body-shore
cg21870038	female	-0.211568	0.0146443	3.04708e-26	1.16425e-20	17	33390736	RFFL	1stExon-opensea
cg13153865	female	-0.174575	0.0122316	6.94693e-26	2.65433e-20	8	90914101	OSGIN2	5'UTR-shore
cg05032848	female	-0.166709	0.0117408	9.82785e-26	3.75509e-20	17	33390854	RFFL	TSS200-opensea
cg11066209	female	-0.235533	0.0166302	1.1667e-25	4.4578e-20	7	2282252	FTSJ2	TSS1500-shore
cg03663556	female	-0.353455	0.0251411	1.91226e-25	7.30648e-20	7	50900556		IGR-opensea
cg22356324	female	-0.186446	0.0134409	4.66698e-25	1.78319e-19	10	71077947	HK1	Body-island
cg06766367	female	-0.224163	0.016307	8.49189e-25	3.24464e-19	16	67062687	CBFB	TSS1500-island
cg09029902	female	-0.281805	0.0205106	8.77727e-25	3.35368e-19	20	52199594	ZNF217	5'UTR-shore
cg08539620	female	-0.138643	0.0101105	9.97884e-25	3.81278e-19	17	40118030	CNP	TSS1500-shore
cg08328160	female	0.161125	0.0117891	1.2402e-24	4.73863e-19	6	32151394	AGER	Body-opensea
cg06491116	female	-0.142454	0.010713	7.37325e-24	2.81722e-18	11	118122715	MPZL3	Body-opensea
cg10853830	female	0.168149	0.0126474	7.45112e-24	2.84697e-18	11	67266176	PITPNM1	Body-shelf
cg27616751	female	0.169822	0.0127767	7.58401e-24	2.89775e-18	7	100883077	FIS1	3'UTR-opensea
cg15626828	female	-0.338373	0.0256975	1.3823e-23	5.2816e-18	1	198651141	PTPRC	Body-opensea
cg00129232	female	0.170519	0.0129689	1.51752e-23	5.79824e-18	17	37814104	STARD3	Body-opensea
cg02627286	female	0.188773	0.0143643	1.56569e-23	5.9823e-18	16	89590583	SPG7	Body-shore
cg05516390	female	-0.322172	0.0247305	2.73163e-23	1.04372e-17	16	73088677	ZFHX3	5'UTR-shelf
cg02330500	female	-0.17938	0.0138218	3.47085e-23	1.32617e-17	14	95731916	CLMN	Body-opensea
cg10707788	female	0.22159	0.0171277	4.22874e-23	1.61575e-17	6	1635847	GMDS	Body-opensea
cg03169557	female	0.198691	0.0153604	4.27726e-23	1.63429e-17	16	89598950	SPG7	Body-opensea
cg09506661	female	0.177207	0.0137513	5.42338e-23	2.0722e-17	19	1152022	SBNO2	Body-island
cg07195577	female	-0.217388	0.0169707	7.89641e-23	3.01712e-17	17	27052828	TLCD1	Body-shore
cg11114465	female	0.107979	0.00847872	1.13517e-22	4.33734e-17	3	194360708		IGR-opensea
cg15034393	female	-0.231716	0.0182235	1.25269e-22	4.78638e-17	3	152856773		IGR-opensea
cg11117099	female	-0.253758	0.0199949	1.40959e-22	5.38587e-17	17	43325657	LOC100133991	Body-island
cg03177025	female	-0.191277	0.0151186	1.7096e-22	6.53216e-17	2	28112917	BRE	TSS1500-shore
cg11586448	female	-0.305421	0.0241694	1.84066e-22	7.03291e-17	12	123383399		IGR-shelf
cg17760049	female	0.190307	0.0150942	2.11897e-22	8.09631e-17	7	4774448	FOXK1	Body-opensea
cg03946762	female	-0.293379	0.0238111	8.68596e-22	3.31879e-16	12	54785043	ZNF385A	5'UTR-island
cg27080119	female	-0.214576	0.0174322	9.21169e-22	3.51967e-16	4	120987409	MAD2L1	Body-shore
cg00216961	female	-0.2587	0.0212867	1.99079e-21	7.60655e-16	12	6054731	ANO2	Body-opensea
cg01367005	female	-0.160845	0.0132524	2.15556e-21	8.23613e-16	17	38518966	GJD3	1stExon-island
cg21783847	female	-0.194245	0.0162007	4.46571e-21	1.70629e-15	1	167522422	CREG1	Body-shore
cg20740711	female	-0.356597	0.0297934	4.95548e-21	1.89342e-15	2	113450279		IGR-opensea
cg03137889	female	-0.229859	0.0192992	6.63102e-21	2.53363e-15	6	108454859		IGR-shore
cg04907244	female	-0.305785	0.025819	9.24399e-21	3.53201e-15	7	22894795	SNORD93	TSS1500-shore
cg27478167	female	0.114669	0.00970644	1.07155e-20	4.09425e-15	7	817139	HEATR2	Body-shelf
cg15628956	female	-0.157251	0.0134764	2.20589e-20	8.4284e-15	12	53448234	TENC1	Body-island
cg23209302	female	0.152655	0.0131037	2.42323e-20	9.25886e-15	1	1326152	CCNL2	Body-shelf
cg12279138	female	-0.303569	0.0262106	3.39873e-20	1.29861e-14	1	224370322	DEGS1	TSS1500-shore
cg07961632	female	-0.250775	0.0216947	3.80509e-20	1.45388e-14	1	27668421	SYTL1	TSS200-opensea
cg13394216	female	0.187246	0.0162116	3.98374e-20	1.52214e-14	6	1635808	GMDS	Body-opensea
cg07339393	female	0.179723	0.015608	4.74994e-20	1.81489e-14	10	3789537		IGR-opensea
cg02196651	female	-0.253199	0.0220202	5.15427e-20	1.96938e-14	4	54457842	LNX1	TSS200-opensea
cg20510600	female	0.116815	0.0101993	6.46139e-20	2.46881e-14	1	54820824	SSBP3	Body-shore
cg02596427	female	0.134155	0.0117671	8.39529e-20	3.20773e-14	2	47295058	TTC7A	Body-opensea
cg22932220	female	-0.154014	0.0135369	9.4462e-20	3.60927e-14	17	49244634	NME2	Body-island
cg12131862	female	0.187087	0.0165377	1.30477e-19	4.98535e-14	1	203613877	ATP2B4	5'UTR-opensea
cg04860852	female	-0.164453	0.0145661	1.46093e-19	5.58201e-14	1	200993069	KIF21B	TSS1500-shore
cg03286774	female	0.164451	0.014606	1.7067e-19	6.52109e-14	16	89590357	SPG7	Body-shore
cg12003230	female	0.117877	0.0104695	1.70722e-19	6.52307e-14	21	44899139	C21orf84	TSS1500-opensea
cg26908825	female	0.146322	0.0130046	1.77266e-19	6.77312e-14	6	1635818	GMDS	Body-opensea
cg08381537	female	0.250791	0.0223203	1.91612e-19	7.32125e-14	19	310296	MIER2	Body-island
cg26993251	female	-0.0960566	0.00856103	2.07392e-19	7.92418e-14	11	63934014	MACROD1	TSS1500-island
cg17724627	female	0.162936	0.0145374	2.20406e-19	8.42141e-14	12	50041367	FMNL3	Body-opensea
cg22358236	female	-0.265577	0.0237819	2.70531e-19	1.03366e-13	11	62691452		IGR-island
cg08171483	female	0.165288	0.0148428	3.16447e-19	1.2091e-13	3	38010391	CTDSPL	Body-opensea
cg10725623	female	0.0853499	0.00768299	3.62325e-19	1.3844e-13	6	32131571	EGFL8	TSS1500-shelf
cg05780177	female	-0.117034	0.0105362	3.64491e-19	1.39267e-13	1	197744757	DENND1B	TSS200-island
cg08943107	female	0.150624	0.0135872	4.06955e-19	1.55492e-13	1	39943966	MACF1	Body-opensea
cg06379876	female	0.192892	0.0174033	4.11393e-19	1.57188e-13	1	41220106	NFYC	Body-opensea
cg02075410	female	0.221832	0.0200521	4.56845e-19	1.74555e-13	4	151504138	LRBA	Body-island
cg08438705	female	0.187937	0.017015	4.98414e-19	1.90437e-13	19	1152189	SBNO2	Body-island
cg24988684	female	-0.263381	0.0238712	5.29316e-19	2.02245e-13	17	76128556	TMC8	Body-shore
cg10549973	female	-0.185926	0.0168917	6.0459e-19	2.31006e-13	14	58863097	TOMM20L	Body-island
cg14035521	female	-0.173738	0.0157987	6.35563e-19	2.4284e-13	9	37486469	POLR1E	Body-shore
cg10635645	female	0.117955	0.0107356	6.67537e-19	2.55057e-13	12	12938397	APOLD1	Body-shore
cg16290996	female	-0.287027	0.0262384	8.49783e-19	3.24691e-13	1	173835989	GAS5	Body-shore
cg07537821	female	-0.397447	0.0363431	8.6366e-19	3.29993e-13	11	122727440	CRTAM	Body-opensea
cg25386676	female	0.261241	0.0239258	9.41374e-19	3.59687e-13	5	172175721		IGR-island
cg09427944	female	-0.347911	0.0319074	1.01541e-18	3.87976e-13	16	30579519		IGR-shore
cg26425555	female	-0.14246	0.0130825	1.09207e-18	4.17266e-13	5	16616459	FAM134B	Body-shore
cg23023126	female	0.192973	0.0177598	1.22977e-18	4.69878e-13	19	308808	MIER2	Body-island
cg24327132	female	-0.283808	0.026212	1.49093e-18	5.69666e-13	15	72520632	PKM2	5'UTR-shore
cg25969122	female	-0.290733	0.0268745	1.56184e-18	5.96758e-13	11	119630362		IGR-opensea
cg24762359	female	-0.141599	0.0131561	2.06102e-18	7.87488e-13	13	25254447	ATP12A	TSS1500-island
cg16881676	female	-0.156737	0.0145815	2.21218e-18	8.45247e-13	12	49659619	TUBA1C	Body-shore
cg15387123	female	-0.240002	0.0223528	2.35014e-18	8.97957e-13	9	139891058	CLIC3	TSS200-shore
cg19939077	female	-0.238689	0.0222371	2.38795e-18	9.12403e-13	10	81108060	PPIF	Body-shore
cg02189785	female	-0.112056	0.0105103	3.43757e-18	1.31345e-12	9	139891008	CLIC3	1stExon-shore
cg01399319	female	0.101991	0.0095876	3.87235e-18	1.47958e-12	1	1326204	CCNL2	Body-shelf
cg06671340	female	-0.125329	0.0118142	4.49386e-18	1.71705e-12	1	197744787	DENND1B	TSS200-island
cg09494609	female	-0.213204	0.0201081	4.61865e-18	1.76473e-12	12	53448180	TENC1	Body-island
cg25252598	female	-0.205361	0.0193736	4.68582e-18	1.79039e-12	12	6641602		IGR-shore
cg26421308	female	0.125504	0.0118943	5.98031e-18	2.285e-12	11	86663040	FZD4	Body-shelf
cg24251800	female	0.137545	0.0130468	6.26532e-18	2.3939e-12	17	47675686		IGR-opensea
cg16110314	female	0.117049	0.0111742	8.80309e-18	3.36355e-12	1	246203683	SMYD3	Body-opensea
cg07004744	female	0.240024	0.0229504	9.57101e-18	3.65696e-12	8	641479	ERICH1	Body-shelf
cg02297801	female	-0.246083	0.0235627	1.03031e-17	3.9367e-12	1	1710663	NADK	TSS1500-shore
cg20575277	female	-0.206731	0.0198025	1.05202e-17	4.01963e-12	15	90728569	SEMA4B	5'UTR-island
cg01393234	female	-0.237862	0.0227877	1.0598e-17	4.04935e-12	1	226085079		IGR-opensea
cg11302791	female	0.154979	0.0148872	1.22016e-17	4.66209e-12	8	10635419	PINX1	Body-opensea
cg13151135	female	-0.108245	0.0103988	1.22515e-17	4.68115e-12	1	26560306	CCDC21	TSS1500-shore
cg11441693	female	-0.304604	0.0292654	1.23192e-17	4.707e-12	17	48194635	SAMD14	Body-island
cg01794555	female	-0.216507	0.0208294	1.3225e-17	5.05309e-12	13	46742767	LCP1	5'UTR-opensea
cg06643271	female	-0.308312	0.0296649	1.33002e-17	5.08184e-12	17	76128170	TMC8	Body-island
cg15633390	female	-0.276557	0.0266197	1.35699e-17	5.18489e-12	4	99851211	EIF4E	5'UTR-shore
cg15417249	female	-0.285074	0.0274906	1.49593e-17	5.71577e-12	6	114131273		IGR-opensea
cg20934096	female	0.289285	0.0279245	1.57581e-17	6.02096e-12	7	1117418	C7orf50	Body-shelf
cg08786822	female	0.075943	0.00733444	1.61824e-17	6.18307e-12	4	3109268	HTT	Body-opensea
cg13705888	female	0.102598	0.00990954	1.62547e-17	6.21071e-12	6	32131722	EGFL8	TSS1500-shelf
cg00350432	female	0.135956	0.0131337	1.64002e-17	6.26631e-12	15	67065190	SMAD6	Body-opensea
cg06972019	female	-0.263107	0.0254249	1.66715e-17	6.36997e-12	1	8937448	ENO1	5'UTR-shore
cg18527651	female	-0.376822	0.0366432	2.31315e-17	8.83825e-12	3	10284280	IRAK2	3'UTR-opensea
cg20935317	female	0.125983	0.0122667	2.47244e-17	9.44686e-12	1	10739184	CASZ1	Body-opensea
cg23832497	female	-0.246431	0.0241053	3.13857e-17	1.19921e-11	6	121655383	C6orf170	Body-shore
cg09159452	female	0.332497	0.0325273	3.15461e-17	1.20534e-11	7	2609861	IQCE	Body-opensea
cg15958839	female	0.124355	0.0121698	3.21613e-17	1.22884e-11	2	54843164	SPTBN1	Body-opensea
cg12408295	female	-0.0957124	0.00937068	3.28585e-17	1.25548e-11	20	42286743		IGR-shore
cg01280080	female	-0.322692	0.0316227	3.44886e-17	1.31776e-11	2	216177276	ATIC	Body-shore
cg08305799	female	-0.272818	0.0267376	3.46496e-17	1.32392e-11	8	30580804	GSR	Body-shelf
cg20850016	female	-0.0945617	0.00929078	3.94137e-17	1.50595e-11	3	5165254	ARL8B	Body-shore
cg07967632	female	0.229643	0.0225871	4.16625e-17	1.59187e-11	15	101601131	LRRK1	Body-opensea
cg23281340	female	0.0971757	0.00957448	4.55323e-17	1.73973e-11	19	6210918	MLLT1	3'UTR-shore
cg23413697	female	-0.255824	0.0252109	4.60225e-17	1.75846e-11	7	5602639		IGR-island
cg26906217	female	-0.224433	0.0221488	4.9479e-17	1.89053e-11	11	17251956		IGR-shore
cg20326647	female	-0.205206	0.0202844	5.38064e-17	2.05587e-11	8	144820709		IGR-island
cg15978561	female	-0.366797	0.0363757	6.35132e-17	2.42676e-11	2	240196996	HDAC4	Body-island
cg06569947	female	0.111313	0.0110407	6.40126e-17	2.44584e-11	13	114126889	DCUN1D2	Body-opensea
cg00590761	female	-0.0501286	0.00497352	6.49664e-17	2.48228e-11	1	55008319		IGR-island
cg08682723	female	0.173327	0.0172122	6.80068e-17	2.59845e-11	16	81713770	CMIP	Body-shore
cg25588852	female	-0.20299	0.0201987	7.53849e-17	2.88036e-11	2	216877276	MREG	Body-shore
cg05517233	female	-0.199546	0.0198665	7.7433e-17	2.95861e-11	5	135468041	SMAD5	TSS1500-shore
cg05350293	female	-0.173223	0.0172489	7.81216e-17	2.98492e-11	16	89119002		IGR-island
cg11936643	female	-0.219971	0.0219104	7.93349e-17	3.03128e-11	10	116286411	ABLIM1	Body-opensea
cg24023258	female	-0.207493	0.0206889	8.35865e-17	3.19373e-11	8	143781297	LY6K	TSS1500-shore
cg22871253	female	-0.294574	0.0294955	1.03425e-16	3.95172e-11	6	159238744	EZR	Body-shore
cg24586978	female	0.268021	0.0268391	1.03887e-16	3.96937e-11	13	99612723	DOCK9	Body-opensea
cg07946977	female	-0.355188	0.0356213	1.12052e-16	4.28134e-11	1	221886639	DUSP10	5'UTR-opensea
cg10770662	female	0.227039	0.0227696	1.12089e-16	4.28278e-11	6	46890102	GPR116	TSS1500-opensea
cg04009429	female	0.127512	0.0127903	1.13084e-16	4.3208e-11	7	100883125	FIS1	Body-opensea
cg09934056	female	-0.249772	0.0251349	1.33022e-16	5.08258e-11	19	8400203	KANK3	Body-island
cg04549287	female	0.153674	0.0154722	1.3646e-16	5.21397e-11	13	52952319	THSD1	Body-opensea
cg25602159	female	-0.108943	0.0110834	2.29445e-16	8.76681e-11	19	41222284	ADCK4	5'UTR-shore
cg25418484	female	0.118146	0.0120711	2.83605e-16	1.08362e-10	11	71709762	IL18BP	TSS200-opensea
cg23718606	female	-0.104273	0.0106564	2.87075e-16	1.09688e-10	6	27219812	PRSS16	Body-island
cg16310077	female	-0.128084	0.0131533	3.64666e-16	1.39334e-10	14	105554214		IGR-island
cg08569678	female	-0.281981	0.0289723	3.73953e-16	1.42883e-10	8	143781397	LY6K	TSS200-shore
cg10843210	female	0.134313	0.0138042	3.79519e-16	1.45009e-10	3	195613589	TNK2	Body-island
cg25574765	female	-0.339102	0.0349248	4.20634e-16	1.60719e-10	11	70211531	PPFIA1	Body-opensea
cg05902503	female	0.178715	0.0184117	4.269e-16	1.63113e-10	16	30133175	MAPK3	Body-shore
cg25827710	female	-0.353857	0.0364719	4.36557e-16	1.66803e-10	13	46742802	LCP1	5'UTR-opensea
cg02874908	female	-0.191601	0.0198189	5.19775e-16	1.98599e-10	11	67205113	PTPRCAP	5'UTR-shore
cg26828839	female	-0.260344	0.0269371	5.27057e-16	2.01382e-10	12	6054749	ANO2	Body-opensea
cg11217193	female	0.21104	0.0218731	5.72798e-16	2.18859e-10	1	12538341	VPS13D	Body-opensea
cg26521404	female	0.309337	0.0320685	5.79493e-16	2.21417e-10	7	27204981	HOXA9	1stExon-island
cg10420161	female	0.303183	0.0314308	5.79642e-16	2.21474e-10	10	102899983		IGR-island
cg19643921	female	-0.137605	0.014275	5.98785e-16	2.28788e-10	19	41197106	NUMBL	TSS1500-island
cg24691336	female	-0.175739	0.0182353	6.05913e-16	2.31511e-10	10	62492301		IGR-shore
cg21026469	female	-0.154874	0.0161148	6.93133e-16	2.64837e-10	8	144820683		IGR-island
cg03915012	female	0.13237	0.0137908	7.37448e-16	2.81769e-10	4	902074	GAK	Body-shelf
cg19069882	female	-0.177872	0.0185374	7.49025e-16	2.86193e-10	11	118123243	MPZL3	TSS1500-opensea
cg10542975	female	-0.21696	0.0226165	7.57864e-16	2.8957e-10	11	67205096	PTPRCAP	5'UTR-shore
cg13014333	female	-0.21295	0.0222092	7.75868e-16	2.96449e-10	6	31762776	VARS	Body-shore
cg26034341	female	0.179145	0.0187136	8.3841e-16	3.20345e-10	17	477314	VPS53	Body-opensea
cg11856711	female	-0.129284	0.0135148	8.6823e-16	3.3174e-10	12	54785309	ZNF385A	TSS1500-shore
cg00746143	female	0.171727	0.0180699	1.19136e-15	4.55205e-10	3	194959645	C3orf21	Body-opensea
cg18901278	female	-0.1927	0.0202862	1.21818e-15	4.65449e-10	17	76128531	TMC8	Body-shore
cg14778622	female	-0.21288	0.0224537	1.33582e-15	5.104e-10	2	136743698	DARS	TSS1500-shore
cg02711479	female	0.163718	0.0172878	1.40991e-15	5.38707e-10	1	36849024	STK40	5'UTR-shelf
cg22417733	female	-0.242576	0.0256192	1.42134e-15	5.43075e-10	6	153303409	FBXO5	5'UTR-island
cg14488715	female	0.144603	0.0152996	1.55016e-15	5.92297e-10	9	139407288	NOTCH1	Body-shore
cg08162205	female	0.168602	0.0178472	1.58526e-15	6.05706e-10	3	152109952	MBNL1	Body-opensea
cg17276002	female	-0.150205	0.0159043	1.60657e-15	6.1385e-10	10	75172806	ANXA7	5'UTR-shore
cg11755933	female	0.185553	0.019702	1.83517e-15	7.01195e-10	11	67266128	PITPNM1	Body-shelf
cg25630588	female	0.156566	0.0166249	1.83868e-15	7.02537e-10	3	50357322	HYAL2	Body-shore
cg15391464	female	-0.200645	0.0213302	1.94319e-15	7.42469e-10	17	27047549	RPL23A	Body-shore
cg01722297	female	-0.243005	0.0258414	1.972e-15	7.53477e-10	17	46190702	SNX11	Body-opensea
cg22931402	female	-0.148668	0.0158136	1.9965e-15	7.62837e-10	4	113207418	TIFA	TSS1500-shore
cg19718686	female	-0.161061	0.0171639	2.18125e-15	8.33427e-10	12	115141551		IGR-shelf
cg25583580	female	-0.259653	0.0277041	2.30992e-15	8.8259e-10	17	74731433	SFRS2	3'UTR-shore
cg06651376	female	0.147072	0.0156952	2.33236e-15	8.91164e-10	17	1690794	SMYD4	Body-opensea
cg17701921	female	0.129785	0.0138593	2.40467e-15	9.18795e-10	19	537170	CDC34	Body-shore
cg06525280	female	-0.269642	0.0288244	2.52657e-15	9.65371e-10	2	216177303	ATIC	Body-shore
cg01302240	female	0.250349	0.0267631	2.53123e-15	9.67151e-10	9	116263669	RGS3	TSS200-opensea
cg06439269	female	0.15314	0.0163853	2.63682e-15	1.0075e-09	4	2256756	MXD4	Body-opensea
cg13112407	female	-0.304598	0.0325976	2.66355e-15	1.01771e-09	2	97204931	ARID5A	Body-shore
cg08443563	female	-0.33935	0.0363417	2.75116e-15	1.05118e-09	2	112456811		IGR-opensea
cg16747828	female	0.11736	0.0125804	2.8782e-15	1.09972e-09	12	12938425	APOLD1	Body-shore
cg14480046	female	-0.230478	0.0247602	3.19037e-15	1.219e-09	12	122444580		IGR-opensea
cg23488578	female	0.0914675	0.00984747	3.52921e-15	1.34846e-09	14	95585023	DICER1	Body-opensea
cg03622664	female	0.186455	0.0200998	3.74828e-15	1.43217e-09	13	21371628	XPO4	Body-opensea
cg18733230	female	0.136396	0.0147176	3.9212e-15	1.49824e-09	7	4763182	FOXK1	Body-shore
cg14823851	female	0.156881	0.0169557	4.2327e-15	1.61726e-09	17	59532306	TBX4	TSS1500-island
cg23440816	female	0.242452	0.026209	4.26933e-15	1.63126e-09	1	223948910	CAPN2	Body-opensea
cg09492252	female	0.108204	0.011701	4.34067e-15	1.65851e-09	21	43369331	C2CD2	Body-shelf
cg10819733	female	-0.190678	0.0206721	4.88615e-15	1.86693e-09	22	24237672		IGR-shore
cg18342060	female	0.174712	0.0189513	5.00876e-15	1.91378e-09	11	10321757		IGR-shelf
cg02568716	female	0.250154	0.0271506	5.14942e-15	1.96753e-09	12	117113346		IGR-opensea
cg13020466	female	0.0937948	0.0101856	5.28125e-15	2.0179e-09	17	76416705	PGS1	3'UTR-opensea
cg11786839	female	0.15031	0.0163397	5.53989e-15	2.11672e-09	6	1635578	GMDS	Body-opensea
cg24441911	female	0.141056	0.0153394	5.63409e-15	2.15271e-09	12	7280988	RBP5	Body-opensea
cg05696153	female	0.163531	0.0178251	6.27972e-15	2.3994e-09	16	81732038	CMIP	Body-opensea
cg13184448	female	0.154437	0.0168604	6.75494e-15	2.58098e-09	2	238647857	LRRFIP1	Body-shelf
cg12744634	female	-0.133899	0.0146275	6.95678e-15	2.6581e-09	1	26560303	CCDC21	TSS1500-shore
cg16205058	female	-0.156721	0.0171495	7.51842e-15	2.87269e-09	14	20924369	APEX1	Body-shore
cg11888747	female	-0.314891	0.0344838	7.78657e-15	2.97515e-09	3	9821816	TADA3	3'UTR-opensea
cg12527684	female	-0.17884	0.0195929	7.93647e-15	3.03242e-09	4	99851156	EIF4E	5'UTR-shore
cg14764357	female	0.235381	0.0258055	8.19788e-15	3.1323e-09	7	1093718	C7orf50	Body-shelf
cg16768018	female	0.264278	0.0290228	8.86411e-15	3.38686e-09	3	147108843	ZIC4	Body-island
cg06024289	female	-0.0835509	0.00917929	9.03289e-15	3.45135e-09	12	53342595	KRT18	TSS200-shore
cg08523694	female	0.191436	0.0210409	9.20724e-15	3.51797e-09	5	57076192		IGR-opensea
cg06811300	female	-0.376619	0.0414055	9.32083e-15	3.56137e-09	6	16504474	ATXN1	5'UTR-opensea
cg09803959	female	-0.389031	0.0427806	9.42778e-15	3.60223e-09	17	78865514	RPTOR	Body-shore
cg15692229	female	0.0881373	0.00970822	1.01679e-14	3.88502e-09	7	55257946	EGFR	Body-opensea
cg03026306	female	-0.152332	0.0167868	1.03808e-14	3.96636e-09	18	21718767	CABYR	TSS200-shore
cg05945615	female	-0.0626345	0.006903	1.04332e-14	3.98638e-09	22	38035456	SH3BP1	TSS1500-island
cg14145194	female	-0.289678	0.0319432	1.0698e-14	4.08757e-09	19	10450022	ICAM3	Body-opensea
cg06825878	female	-0.209026	0.0230615	1.09531e-14	4.18503e-09	7	75472540		IGR-opensea
cg10830713	female	-0.0583229	0.00644059	1.14231e-14	4.36462e-09	1	62904021	USP1	5'UTR-shore
cg04271289	female	0.207639	0.022934	1.15251e-14	4.4036e-09	19	1152147	SBNO2	Body-island
cg05514256	female	0.18005	0.0198923	1.16711e-14	4.45936e-09	2	45231891		IGR-island
cg26319363	female	0.150719	0.016653	1.17138e-14	4.4757e-09	4	753903	PCGF3	Body-shore
cg11855693	female	0.17079	0.0188826	1.20535e-14	4.60549e-09	12	96632551	ELK3	Body-opensea
cg13411286	female	0.221069	0.024459	1.24548e-14	4.75883e-09	2	191365138	MFSD6	3'UTR-opensea
cg04214370	female	0.0938721	0.010398	1.31285e-14	5.01624e-09	1	246203659	SMYD3	Body-opensea
cg09464735	female	0.198517	0.0220089	1.36717e-14	5.22378e-09	5	172175855		IGR-island
cg20133191	female	0.136061	0.0151048	1.45233e-14	5.54917e-09	7	2638016	IQCE	Body-opensea
cg12074585	female	0.174082	0.0193468	1.52648e-14	5.83247e-09	12	7280958	RBP5	Body-opensea
cg10283844	female	0.267278	0.0297234	1.57171e-14	6.0053e-09	2	10487314	HPCAL1	5'UTR-opensea
cg02597246	female	0.196201	0.0218204	1.57592e-14	6.02137e-09	16	81711959	CMIP	Body-island
cg03684062	female	-0.279138	0.0310485	1.58595e-14	6.05971e-09	19	3179364	S1PR4	1stExon-island
cg19586165	female	0.128725	0.0143194	1.59276e-14	6.08573e-09	17	37814072	STARD3	Body-opensea
cg25441338	female	0.257182	0.0286319	1.65141e-14	6.30982e-09	17	59429949	BCAS3	Body-opensea
cg00253248	female	-0.300934	0.033503	1.65194e-14	6.31185e-09	17	48948878		IGR-shelf
cg07714812	female	0.157381	0.0175322	1.6994e-14	6.49319e-09	6	1635611	GMDS	Body-opensea
cg23456595	female	-0.208934	0.0232959	1.76917e-14	6.75978e-09	11	67203434	PTPRCAP	Body-island
cg25168494	female	0.166826	0.018622	1.86151e-14	7.11258e-09	2	63286355		IGR-island
cg01637011	female	-0.11358	0.0126794	1.86815e-14	7.13798e-09	1	200992964	KIF21B	TSS200-shore
cg17655624	female	-0.141648	0.0158206	1.91042e-14	7.29947e-09	12	54785320	ZNF385A	TSS1500-shore
cg26137219	female	0.335249	0.0374484	1.92119e-14	7.3406e-09	10	30720647		IGR-shore
cg16785213	female	-0.124211	0.013876	1.92918e-14	7.37116e-09	16	75599104	GABARAPL2	TSS1500-shore
cg00310375	female	-0.0933879	0.0104409	1.99854e-14	7.63616e-09	2	85906657		IGR-opensea
cg20309677	female	0.176032	0.0196842	2.01511e-14	7.69947e-09	1	116925753	ATP1A1	TSS1500-opensea
cg10514113	female	0.0890196	0.00995957	2.06359e-14	7.8847e-09	17	80765517	TBCD	Body-island
cg03109921	female	0.323868	0.036285	2.19684e-14	8.39383e-09	17	40820189	PLEKHH3	Body-shore
cg08549335	female	-0.342601	0.0383961	2.22873e-14	8.51568e-09	7	30387954	ZNRF2	Body-opensea
cg25287474	female	-0.107836	0.0121016	2.36683e-14	9.04334e-09	9	14693538	ZDHHC21	TSS200-island
cg19358397	female	-0.254314	0.0285778	2.51202e-14	9.59812e-09	11	1794018		IGR-opensea
cg26601431	female	0.132275	0.0148728	2.57913e-14	9.8545e-09	1	235054899		IGR-opensea
cg04228042	female	0.207558	0.0234069	2.94567e-14	1.1255e-08	12	14996527	ART4	TSS200-opensea
cg14654171	female	-0.38081	0.0429756	3.04021e-14	1.16163e-08	9	130151001	GARNL3	Body-opensea
cg09853702	female	-0.34679	0.0392003	3.26933e-14	1.24917e-08	12	47665230		IGR-opensea
cg19912283	female	0.14858	0.0167957	3.2741e-14	1.25099e-08	6	30884590	VARS2	Body-shelf
cg02580005	female	0.182435	0.0206355	3.36559e-14	1.28595e-08	4	151504187	LRBA	Body-island
cg09999582	female	-0.153291	0.0173454	3.42181e-14	1.30743e-08	2	103352711	MFSD9	Body-shore
cg20607293	female	-0.210618	0.0238369	3.45167e-14	1.31884e-08	1	147112703		IGR-opensea
cg08137085	female	0.260267	0.0294947	3.65921e-14	1.39814e-08	7	1117540	C7orf50	Body-shelf
cg04441857	female	-0.32676	0.0370667	3.82416e-14	1.46116e-08	10	14701815	FAM107B	Body-opensea
cg20472746	female	-0.266392	0.0302408	3.94924e-14	1.50895e-08	13	42039334	C13orf15	Body-opensea
cg03297901	female	-0.317459	0.0360552	4.0342e-14	1.54142e-08	17	76117767	TMC6	Body-opensea
cg14874541	female	-0.158078	0.0179553	4.0511e-14	1.54787e-08	3	124304033	KALRN	Body-island
cg10272731	female	0.169091	0.0192278	4.2578e-14	1.62685e-08	16	85614015		IGR-opensea
cg20157753	female	-0.305924	0.034798	4.3149e-14	1.64867e-08	2	113594343	IL1B	1stExon-opensea
cg02055255	female	0.0750427	0.00853937	4.39314e-14	1.67856e-08	1	10726728	CASZ1	Body-shore
cg16622514	female	0.0572215	0.00651215	4.41458e-14	1.68675e-08	5	74772303	COL4A3BP	Body-opensea
cg09179046	female	-0.085177	0.00969994	4.54262e-14	1.73568e-08	16	14164850	MKL2	TSS1500-island
cg09844094	female	0.205453	0.0234053	4.61513e-14	1.76338e-08	6	12586063		IGR-opensea
cg09479241	female	-0.148388	0.0169127	4.7147e-14	1.80142e-08	17	27052676	TLCD1	Body-shore
cg04951797	female	-0.213104	0.0243059	4.86405e-14	1.85849e-08	3	20226964	SGOL1	5'UTR-shore
cg03407567	female	-0.189672	0.021658	5.11406e-14	1.95402e-08	12	56545570	MYL6B	TSS1500-shore
cg21057323	female	-0.333825	0.0381296	5.18109e-14	1.97963e-08	14	103412980	CDC42BPB	Body-opensea
cg16389078	female	-0.287773	0.0328784	5.24304e-14	2.0033e-08	22	17569018	IL17RA	Body-shelf
cg18581405	female	-0.303386	0.0346711	5.30285e-14	2.02615e-08	19	3180035	S1PR4	3'UTR-shore
cg20315995	female	0.155527	0.0177803	5.38973e-14	2.05935e-08	12	7280971	RBP5	Body-opensea
cg22146357	female	-0.247224	0.0282682	5.43034e-14	2.07486e-08	8	143781406	LY6K	TSS200-shore
cg17723299	female	-0.11481	0.013131	5.49166e-14	2.09829e-08	1	197744929	DENND1B	TSS1500-shore
cg11872373	female	0.0940046	0.0107588	5.65797e-14	2.16184e-08	7	151833893	MLL3	3'UTR-opensea
cg17611742	female	-0.275732	0.0315692	5.75168e-14	2.19764e-08	1	197745238	DENND1B	TSS1500-shore
cg03569637	female	-0.263196	0.0301673	6.03751e-14	2.30685e-08	12	47609357	LOC100233209	Body-opensea
cg26728422	female	-0.119472	0.0136955	6.07161e-14	2.31988e-08	16	1429015	UNKL	5'UTR-shore
cg04716447	female	-0.197628	0.022659	6.12009e-14	2.33841e-08	12	122444621		IGR-opensea
cg11536474	female	0.244411	0.0280275	6.16448e-14	2.35537e-08	2	63286049		IGR-island
cg15667493	female	0.192128	0.0220903	6.92012e-14	2.64409e-08	5	55404179	ANKRD55	Body-opensea
cg06125903	female	-0.224834	0.025873	7.18429e-14	2.74502e-08	20	57583328	CTSZ	TSS1500-shore
cg23003085	female	-0.228462	0.0262996	7.29361e-14	2.78679e-08	11	64084321	PRDX5	TSS1500-shore
cg03143486	female	0.173707	0.020023	7.7271e-14	2.95242e-08	7	811491	HEATR2	Body-shelf
cg23612220	female	-0.244741	0.0282214	7.85164e-14	3.00001e-08	1	151129298	TNFAIP8L2	5'UTR-opensea
cg20968743	female	-0.403055	0.0464931	7.9734e-14	3.04653e-08	11	44883965	TSPAN18	5'UTR-opensea
cg24939196	female	-0.349158	0.0403054	8.2305e-14	3.14477e-08	6	169588809		IGR-opensea
cg09663494	female	0.164039	0.018939	8.28648e-14	3.16616e-08	16	67223733	EXOC3L	5'UTR-opensea
cg13595913	female	0.124343	0.0143601	8.39116e-14	3.20615e-08	9	5786038	ERMP1	3'UTR-opensea
cg14531564	female	-0.202399	0.0233864	8.57824e-14	3.27763e-08	1	1154853	SDF4	Body-shore
cg11869499	female	-0.285095	0.0329613	8.80488e-14	3.36423e-08	15	89872984	POLG	Body-shelf
cg27418434	female	0.237089	0.0274141	8.84634e-14	3.38007e-08	7	751009	PRKAR1B	Body-island
cg04044203	female	0.278099	0.0321565	8.85198e-14	3.38223e-08	11	124631218	ESAM	Body-shore
cg16620032	female	-0.151673	0.0175392	8.88041e-14	3.39309e-08	19	46097075	GPR4	5'UTR-shore
cg12535569	female	-0.293244	0.0339325	9.13704e-14	3.49114e-08	11	67205291	PTPRCAP	TSS200-shore
cg09817641	female	0.112894	0.0130669	9.24141e-14	3.53102e-08	11	35845023		IGR-opensea
cg22531371	female	-0.211387	0.0244802	9.46248e-14	3.61549e-08	1	155162756	MUC1	TSS200-shore
cg15068180	female	0.132746	0.0153749	9.5112e-14	3.63411e-08	3	194017703		IGR-shelf
cg18563999	female	-0.148864	0.0172653	1.00898e-13	3.8552e-08	12	54785003	ZNF385A	Body-island
cg25671438	female	-0.312267	0.0362478	1.04726e-13	4.00144e-08	17	7240223	ACAP1	Body-opensea
cg02685484	female	-0.183668	0.0213323	1.07331e-13	4.10097e-08	11	67203360	PTPRCAP	Body-island
cg27374758	female	0.129794	0.015088	1.11378e-13	4.25559e-08	3	121675259		IGR-opensea
cg06191357	female	-0.139518	0.0162248	1.13306e-13	4.32928e-08	1	172714273		IGR-opensea
cg10255237	female	-0.46193	0.0537203	1.13456e-13	4.33499e-08	12	90150622		IGR-opensea
cg02983090	female	-0.228233	0.0265509	1.15025e-13	4.39497e-08	16	27437892	IL21R	TSS1500-opensea
cg01151584	female	-0.264833	0.0308141	1.159e-13	4.4284e-08	11	64627528	EHD1	Body-opensea
cg09233429	female	0.215488	0.0250851	1.18422e-13	4.52473e-08	15	40583241	PLCB2	Body-island
cg26874367	female	-0.426746	0.0496813	1.18757e-13	4.53754e-08	2	129381792		IGR-opensea
cg27234490	female	0.113062	0.0131851	1.27815e-13	4.88364e-08	3	58174435		IGR-opensea
cg05425213	female	-0.135466	0.0158167	1.34576e-13	5.14199e-08	11	124616208	NRGN	3'UTR-island
cg07883124	female	0.244971	0.0286163	1.37417e-13	5.25052e-08	13	113634042	MCF2L	Body-island
cg02262727	female	0.0680795	0.00796381	1.45883e-13	5.574e-08	11	43707755	HSD17B12	Body-opensea
cg12417815	female	0.187166	0.0219004	1.47632e-13	5.64082e-08	5	148830633		IGR-opensea
cg20786131	female	-0.203805	0.0238493	1.48179e-13	5.66172e-08	18	20714496	CABLES1	TSS1500-shore
cg06903075	female	0.0791668	0.00927007	1.5229e-13	5.81879e-08	11	71709751	IL18BP	TSS1500-opensea
cg14999168	female	-0.285743	0.0334737	1.55137e-13	5.92759e-08	11	70211301	PPFIA1	Body-opensea
cg13066703	female	-0.292028	0.0342228	1.57645e-13	6.02343e-08	1	211526705	TRAF5	Body-opensea
cg26110991	female	-0.296731	0.034781	1.58999e-13	6.07516e-08	21	45578724		IGR-shelf
cg03075966	female	0.153386	0.0179899	1.63191e-13	6.23532e-08	10	120981763	GRK5	Body-opensea
cg20792833	female	-0.238407	0.0279787	1.67503e-13	6.40008e-08	11	67205195	PTPRCAP	TSS200-shore
cg04904318	female	0.27974	0.0328328	1.68233e-13	6.42798e-08	17	46607828	HOXB1	1stExon-island
cg12141030	female	-0.19709	0.0231497	1.73716e-13	6.63747e-08	3	44803447	KIAA1143	TSS1500-island
cg22305258	female	-0.134262	0.0157701	1.73716e-13	6.63747e-08	17	4643367	CXCL16	TSS200-island
cg12113740	female	0.311608	0.0366134	1.76339e-13	6.73767e-08	18	52625368	CCDC68	TSS200-shore
cg13249591	female	-0.120797	0.0141984	1.79028e-13	6.84041e-08	1	151966892	S100A10	TSS200-island
cg22955778	female	-0.257839	0.0303166	1.81593e-13	6.93845e-08	6	27798556		IGR-shore
cg01242619	female	-0.185221	0.0218185	1.96467e-13	7.50673e-08	8	145049472	PLEC1	Body-island
cg22261694	female	-0.486243	0.0572841	1.97347e-13	7.54036e-08	6	106967720	AIM1	Body-opensea
cg18832152	female	-0.222438	0.0262121	1.99505e-13	7.62282e-08	1	155035183	ADAM15	3'UTR-island
cg04234016	female	-0.231938	0.027344	2.03388e-13	7.7712e-08	12	7062109	PTPN6	Body-opensea
cg07052251	female	-0.123519	0.0145633	2.04087e-13	7.79789e-08	21	47392592		IGR-island
cg10200202	female	-0.334936	0.0395022	2.0679e-13	7.90116e-08	10	121277385	RGS10	Body-opensea
cg06745704	female	-0.264725	0.0312416	2.12503e-13	8.11946e-08	1	27668325	SYTL1	TSS200-opensea
cg22407942	female	-0.303577	0.0358343	2.14399e-13	8.19192e-08	7	22894828	SNORD93	TSS1500-shore
cg22820188	female	0.162079	0.0191506	2.23511e-13	8.54008e-08	1	156086004	LMNA	Body-shore
cg26626042	female	0.0655434	0.00774598	2.25499e-13	8.61601e-08	6	32151594	AGER	Body-opensea
cg20617977	female	0.20767	0.0245497	2.28241e-13	8.72081e-08	4	38053457	TBC1D1	Body-opensea
cg06580318	female	-0.090917	0.0107603	2.39801e-13	9.16249e-08	2	169747119	SPC25	TSS200-shore
cg06718763	female	-0.133766	0.015849	2.51208e-13	9.59835e-08	1	24828586	RCAN3	TSS1500-shore
cg07061500	female	-0.0945878	0.0112097	2.53724e-13	9.69445e-08	6	159290520		IGR-shore
cg24018814	female	-0.240955	0.0285699	2.59015e-13	9.89664e-08	12	133348116	GOLGA3	3'UTR-shore
cg06872313	female	0.213401	0.0253045	2.59776e-13	9.9257e-08	12	14413185		IGR-opensea
cg11606444	female	-0.196691	0.0233327	2.6429e-13	1.00982e-07	11	121353563	SORL1	Body-opensea
cg11201447	female	-0.393182	0.0467075	2.80475e-13	1.07166e-07	8	128808063	MIR1204	TSS200-shore
cg26905258	female	-0.315811	0.037579	3.00849e-13	1.1495e-07	13	77898407	MYCBP2	Body-shelf
cg15430661	female	0.124741	0.0148557	3.1161e-13	1.19062e-07	12	52403817	GRASP	Body-shelf
cg14134128	female	-0.211795	0.0252338	3.17257e-13	1.2122e-07	17	76774832	CYTH1	Body-shelf
cg23021796	female	-0.235128	0.0280177	3.19114e-13	1.21929e-07	5	98269394		IGR-shelf
cg14672128	female	0.165188	0.0196845	3.19717e-13	1.2216e-07	12	7280912	RBP5	Body-opensea
cg13058623	female	-0.389339	0.0464008	3.21286e-13	1.22759e-07	1	233040477		IGR-opensea
cg11493223	female	-0.197143	0.0234983	3.23033e-13	1.23427e-07	17	76128522	TMC8	Body-shore
cg10170214	female	0.141842	0.0169078	3.2393e-13	1.23769e-07	10	102765227	LZTS2	Body-island
cg09800500	female	-0.308368	0.0367861	3.34476e-13	1.27799e-07	12	24992256	BCAT1	Body-opensea
cg07507218	female	0.101186	0.0120907	3.58303e-13	1.36903e-07	6	32085535	ATF6B	Body-opensea
cg13415831	female	-0.302069	0.0361083	3.6428e-13	1.39187e-07	9	92137791		IGR-opensea
cg07470207	female	-0.43556	0.0521217	3.81105e-13	1.45615e-07	8	132828746		IGR-opensea
cg23156348	female	-0.0596952	0.00714889	3.93316e-13	1.50281e-07	11	124981869		IGR-shore
cg16603374	female	0.29097	0.0348503	3.95529e-13	1.51127e-07	1	6113068	KCNAB2	Body-shore
cg01954305	female	0.213223	0.0255441	3.99303e-13	1.52568e-07	8	135817117		IGR-opensea
cg10241809	female	-0.148278	0.0177752	4.10297e-13	1.56769e-07	17	80197360	SLC16A3	3'UTR-shore
cg23120601	female	0.236427	0.0283513	4.15667e-13	1.58821e-07	15	40583227	PLCB2	Body-island
cg10988673	female	-0.224515	0.0269311	4.20954e-13	1.60841e-07	15	74423898	ISLR2	5'UTR-shore
cg03636488	female	-0.235001	0.0281922	4.22992e-13	1.6162e-07	12	132551127	EP400	Body-opensea
cg17774559	female	0.382843	0.0459502	4.31513e-13	1.64875e-07	5	1879698	IRX4	Body-island
cg26314722	female	-0.367922	0.0441654	4.34038e-13	1.6584e-07	1	234867300		IGR-opensea
cg00251824	female	0.120385	0.0144513	4.34415e-13	1.65984e-07	8	641466	ERICH1	Body-shelf
cg08098128	female	-0.239447	0.0287475	4.3664e-13	1.66834e-07	2	220112465	STK16	Body-shore
cg00007076	female	-0.234433	0.0281597	4.45921e-13	1.70381e-07	8	67342600	RRS1	1stExon-shore
cg08058560	female	-0.307858	0.0370321	4.73053e-13	1.80748e-07	1	117544206	CD101	TSS200-opensea
cg11732134	female	0.164059	0.0197614	5.00415e-13	1.91202e-07	1	10732912	CASZ1	Body-opensea
cg17833746	female	-0.276638	0.0333558	5.22011e-13	1.99454e-07	17	40489785	STAT3	Body-opensea
cg11860434	female	-0.19843	0.0239374	5.32536e-13	2.03475e-07	7	102067440		IGR-opensea
cg02286008	female	0.212896	0.0256859	5.35415e-13	2.04575e-07	16	30133247	MAPK3	Body-shore
cg01748627	female	-0.17628	0.0212691	5.36391e-13	2.04948e-07	11	67272202	PITPNM1	5'UTR-island
cg19628333	female	0.269593	0.0325499	5.51645e-13	2.10776e-07	12	56914766	RBMS2	TSS1500-opensea
cg06065019	female	-0.337437	0.040762	5.6341e-13	2.15272e-07	2	177356276		IGR-shore
cg12362629	female	0.162022	0.0195747	5.66522e-13	2.16461e-07	22	36716469	MYH9	Body-shore
cg11977716	female	-0.26846	0.0324446	5.74206e-13	2.19396e-07	18	77284742	NFATC1	Body-island
[truncated: 22,997 more rows]

## Sheet: COAD
CpG	sex	meanDiff	ses	pval	bonf	CHR	MAPINFO	gene	feat.cgi
[truncated: 19,030 more rows]

## Sheet: KIRC
CpG	sex	meanDiff	ses	pval	bonf	CHR	MAPINFO	gene	feat.cgi
[truncated: 20,138 more rows]

[truncated: 4 more sheets: KIRP, THCA, BLCA, HNSC]
