# Supplementary material for: Attenuated sex-related DNA methylation differences in cancer highlight the magnitude bias mediating existing disparities
Source: Biol Sex Differ. 2024 Dec 23;15:106. doi: 10.1186/s13293-024-00682-4 (PMC11664931; doi:10.1186/s13293-024-00682-4)
Supplement: Supplementary file 8 — Supplementary material 8. [file 13293_2024_682_MOESM8_ESM.xlsx]

## Sheet: Sheet1
Cancer	GEO	PMID	femaleSize		maleSize		overlapProbes	fDMP				mDMP
			CA	NAT	CA	NAT		overlap.fDMP	Spearman.rho	Spearman.pval	π1	overlapm.DMP	Spearman.rho	Spearman.pval	π1
LIHC	GSE54503	25861255; 23208076	15	16	49	49	329829	678	0.91	<2.2e-16	0.89	3390	0.91	<2.2e-16	0.95
LUAD	GSE66836	26601720	72	9	66	8	321461	7521	0.88	<2.2e-16	0.9	4961	0.89	<2.2e-16	0.85
COAD	GSE199057	36219239	37	38	38	41	335494	8342	0.71	<2.2e-16	0.85	9246	0.73	<2.2e-16	0.79
KIRC	GSE61441	26515236	13	13	30	30	394391	5777	0.86	<2.2e-16	0.91	14351	0.89	<2.2e-16	0.93
THCA	GSE97466	28938489	43	36	15	14	376299	4006	0.97	<2.2e-16	0.94	913	0.98	<2.2e-16	0.98
