# Supplementary material for: Attenuated sex-related DNA methylation differences in cancer highlight the magnitude bias mediating existing disparities
Source: Biol Sex Differ. 2024 Dec 23;15:106. doi: 10.1186/s13293-024-00682-4 (PMC11664931; doi:10.1186/s13293-024-00682-4)
Supplement: Supplementary file 9 — Supplementary material 9. [file 13293_2024_682_MOESM9_ESM.xlsx]

## Sheet: interDMP
interDMP	Cancer	meanDiff	pval	bonf	CHR	MAPINFO	gene	feat.cgi
cg00481999	BLCA	0.156928	2.76e-09	0.00106972	X	47696603	ZNF81	5'UTR-shore
cg00735883	BLCA	0.169015	6.2e-08	0.0240534	X	106567457		IGR-opensea
cg00877056	BLCA	0.0879575	8.55e-09	0.00331651	X	107070410	MID2	Body-shore
cg01572979	BLCA	-0.0626859	2.18e-08	0.00844788	8	27455004	CLU	3'UTR-opensea
cg01972979	BLCA	0.24754	4.6e-10	0.000178619	X	133680446	MGC16121	Body-island
cg02009103	BLCA	0.0340473	1.3e-08	0.00505201	10	102766386	LZTS2	Body-island
cg02210067	BLCA	0.0842023	1.51e-08	0.00586699	X	11777709	MSL3	Body-shore
cg02232922	BLCA	0.0752569	3.56e-08	0.0138127	X	118532809	SLC25A43	TSS1500-shore
cg02384543	BLCA	0.0692253	1.72e-09	0.000666224	19	58879857	ZNF837	Body-island
cg02931149	BLCA	0.154606	1.12e-07	0.0435893	X	153586557	FLNA	Body-shore
cg03035653	BLCA	0.2943	8.44e-10	0.000327575	X	99662932	PCDH19	1stExon-island
cg03330762	BLCA	0.0404278	2.84e-08	0.0110173	19	49686116	TRPM4	Body-island
cg03723123	BLCA	0.142437	8.05e-11	3.12e-05	X	55935143		IGR-opensea
cg03927113	BLCA	0.138886	1.34e-12	5.19e-07	X	119738603	MCTS1	Body-opensea
cg04297522	BLCA	0.159297	8.21e-08	0.0318425	X	153704032		IGR-shelf
cg05127037	BLCA	0.200987	9.52e-08	0.0369395	X	154290180	MTCP1NB	Body-opensea
cg05141289	BLCA	0.0435859	1.23e-09	0.000476339	15	57404080	TCF12	Body-opensea
cg05462236	BLCA	0.173663	6.05e-09	0.0023475	X	63615456	MTMR8	TSS200-shore
cg05474077	BLCA	0.0961881	3.52e-09	0.00136514	X	80457709	HMGN5	TSS1500-opensea
cg05791870	BLCA	0.0661618	1.68e-11	6.5e-06	16	136656	C16orf35	3'UTR-opensea
cg06593906	BLCA	0.0561799	4.69e-16	1.82e-10	7	107026925	COG5	Body-opensea
cg06761530	BLCA	0.0749825	9.78e-09	0.00379337	17	75373219	2024-09-09	5'UTR-shelf
cg07194250	BLCA	0.227436	6.5e-08	0.0252279	X	133680463	MGC16121	Body-island
cg08222309	BLCA	0.104772	9.96e-08	0.0386449	X	80457015	SH3BGRL	TSS1500-opensea
cg08460580	BLCA	0.0392194	3.27e-09	0.00126673	6	689187	EXOC2	5'UTR-shelf
cg08757574	BLCA	0.174579	2.08e-08	0.00805252	X	70273027		IGR-island
cg08991015	BLCA	0.184287	3.87e-08	0.0150077	X	134049419	MOSPD1	TSS200-shore
cg09513996	BLCA	0.147153	2.18e-08	0.00843875	X	48685182		IGR-island
cg10155147	BLCA	0.0392869	1.41e-08	0.00548492	2	106500829	NCK2	Body-shelf
cg10155200	BLCA	0.150732	2.2e-09	0.000852973	X	70522390	ITGB1BP2	Body-opensea
cg10443532	BLCA	0.273698	8.08e-08	0.0313624	X	136657084		IGR-island
cg10530128	BLCA	0.146605	1.11e-07	0.043238	X	48769550	SLC35A2	TSS1500-shore
cg10601476	BLCA	0.0681269	9.33e-15	3.62e-09	17	1437284	PITPNA	Body-opensea
cg10723245	BLCA	0.112793	8.96e-10	0.000347387	X	103401991	MCART6	TSS1500-shore
cg11193681	BLCA	0.115727	3.9e-09	0.00151239	X	118986581	UPF3B	Body-shore
cg11618093	BLCA	0.146076	6.28e-11	2.44e-05	X	152000347	NSDHL	5'UTR-shore
cg12136716	BLCA	0.10246	2.49e-08	0.00964521	3	57722951		IGR-opensea
cg12453500	BLCA	0.0642619	6.3e-09	0.00244344	X	70315455	FOXO4	TSS1500-shore
cg12793826	BLCA	0.0580407	2.52e-08	0.00978897	8	141538019		IGR-opensea
cg12799835	BLCA	0.136867	1e-09	0.000388281	X	57313034	FAAH2	TSS200-opensea
cg13047869	BLCA	0.0689586	7.07e-08	0.0274437	3	10149882	C3orf24	1stExon-island
cg13700197	BLCA	0.0990147	2.4e-08	0.00929777	9	98221975	PTCH1	Body-opensea
cg13775533	BLCA	0.307483	7.5e-13	2.91e-07	X	99663073	PCDH19	1stExon-island
cg13984511	BLCA	0.149553	1.1e-07	0.0425467	X	23760918	ACOT9	Body-shore
cg14119680	BLCA	0.0640606	1.08e-13	4.18e-08	9	133762896	ABL1	3'UTR-shelf
cg14538442	BLCA	0.129591	7.47e-09	0.00289887	X	153605635		IGR-shore
cg14588448	BLCA	0.0503411	7.33e-08	0.028441	9	34372089	KIAA1161	Body-island
cg14789818	BLCA	0.188396	8.12e-08	0.0315119	1	227748712		IGR-island
cg15225044	BLCA	0.113582	1.86e-08	0.00720089	X	119077171	NKAP	Body-island
cg16049598	BLCA	0.157216	2.18e-12	8.46e-07	X	106243646	MORC4	TSS200-shore
cg16126079	BLCA	0.0768375	6.77e-08	0.0262446	11	6518322	DNHD1	TSS1500-opensea
cg16359563	BLCA	0.133124	5.78e-10	0.000224187	X	64196429	ZC4H2	TSS200-opensea
cg16592242	BLCA	0.18395	8.97e-08	0.034798	X	100184535	XKRX	TSS1500-shore
cg16681914	BLCA	0.154917	8.11e-11	3.15e-05	X	11777654	MSL3	Body-shore
cg16784745	BLCA	0.104935	5.26e-10	0.000204093	12	54731086	MIR148B	Body-opensea
cg16976876	BLCA	0.154438	2.1e-10	8.15e-05	X	10124911	CLCN4	TSS200-shore
cg17398485	BLCA	0.187918	7.13e-08	0.0276678	X	118699448	CXorf56	TSS200-opensea
cg18516687	BLCA	0.167848	1.36e-10	5.27e-05	X	154254859	FUNDC2	TSS1500-shore
cg18818432	BLCA	0.116718	7.04e-08	0.0272936	X	100663157	HNRNPH2	TSS200-island
cg18833705	BLCA	0.129012	2.54e-12	9.84e-07	X	134232988	NCRNA00087	TSS1500-island
cg19541913	BLCA	0.135786	1.58e-08	0.00614564	X	103401494	MCART6	5'UTR-island
cg19780684	BLCA	0.112222	2.53e-08	0.00981118	X	15288115	ASB9	1stExon-opensea
cg19836906	BLCA	0.121118	7.42e-08	0.0287737	X	118987328	UPF3B	TSS1500-shore
cg20086420	BLCA	0.129634	2.79e-12	1.08e-06	X	48620337	GLOD5	Body-opensea
cg21032074	BLCA	0.0508992	6.01e-08	0.0233254	6	144184944	C6orf94	TSS1500-opensea
cg21205654	BLCA	0.106985	8.9e-08	0.034529	X	118110766	LONRF3	Body-shore
cg22332233	BLCA	0.157773	3.03e-09	0.00117589	X	48897515	TFE3	Body-shelf
cg22786486	BLCA	0.0925931	3.88e-09	0.00150447	22	20073528	MIR1306	TSS200-island
cg22955387	BLCA	0.193604	1.23e-07	0.0476794	X	133680468	MGC16121	Body-island
cg22975791	BLCA	0.120243	4.59e-09	0.00178047	X	55934874		IGR-opensea
cg23060203	BLCA	0.223088	2.38e-10	9.24e-05	X	138915046	ATP11C	TSS1500-opensea
cg23245720	BLCA	0.251308	1.33e-08	0.00515174	X	133680549	MGC16121	Body-island
cg24367840	BLCA	0.12207	6.53e-09	0.00253232	2	162197869	PSMD14	Body-opensea
cg24808754	BLCA	0.0369135	4.28e-09	0.00165931	17	40851514	CNTNAP1	3'UTR-opensea
cg25368651	BLCA	0.0802435	3.93e-19	1.52e-13	11	6518287	DNHD1	TSS1500-opensea
cg25547663	BLCA	0.125866	3.99e-09	0.00154821	X	48456173	WDR13	TSS200-island
cg26081985	BLCA	0.0352837	2.57e-09	0.000998295	7	1038940	C7orf50	Body-shore
cg26346636	BLCA	0.0903927	6.82e-10	0.000264636	X	41301703		IGR-island
cg26375010	BLCA	0.36759	6.85e-08	0.0265561	X	118407852		IGR-shore
cg26375421	BLCA	0.116202	3.32e-10	0.000128844	X	106243592	MORC4	TSS200-island
cg26570844	BLCA	0.0499021	1.25e-08	0.00483593	7	101579003	CUX1	Body-opensea
cg27053299	BLCA	0.15378	1.76e-08	0.00681749	13	100548780	CLYBL	3'UTR-island
cg27207530	BLCA	0.067282	8.28e-08	0.0321323	16	89357600	ANKRD11	Body-opensea
cg27236096	BLCA	0.0561997	1e-07	0.0387973	16	2635862	PDPK1	Body-shore
cg27460056	BLCA	0.0331336	7.48e-08	0.0290091	7	1038959	C7orf50	Body-shore
cg00040455	COAD	0.172162	6.83e-09	0.00258778	X	30326676	NR0B1	1stExon-island
cg00167275	COAD	0.184444	9.92e-27	3.76e-21	10	88854588	FAM35A	TSS1500-island
cg00191758	COAD	0.360113	6.04e-09	0.0022899	X	55478814	MAGEH1	1stExon-opensea
cg00213853	COAD	0.16264	5.9e-09	0.00223374	X	154034091	MPP1	TSS1500-shore
cg00240113	COAD	0.0993239	3.9e-08	0.0147878	X	136648241	ZIC3	TSS200-island
cg00404599	COAD	0.280401	3.57e-12	1.35e-06	X	107018431	TSC22D3	1stExon-shore
cg00481999	COAD	0.183796	5.05e-13	1.91e-07	X	47696603	ZNF81	5'UTR-shore
cg00611101	COAD	0.260922	5.6e-08	0.0212013	X	101380608	TCEAL2	TSS200-opensea
cg00723997	COAD	0.181695	5.59e-08	0.0211792	X	48690473	PCSK1N	Body-island
cg00735883	COAD	0.207469	5.94e-08	0.0224953	X	106567457		IGR-opensea
cg00809111	COAD	0.262519	2.36e-11	8.93e-06	X	130192134	FLJ30058	TSS200-island
cg00849191	COAD	0.226487	3.04e-09	0.00115207	X	152939154	PNCK	Body-island
cg00877056	COAD	0.0804897	9.56e-10	0.000362232	X	107070410	MID2	Body-shore
cg00878023	COAD	0.362149	2e-09	0.000756228	X	21392544	CNKSR2	1stExon-island
cg00932276	COAD	0.333229	4.05e-09	0.00153483	X	13587976	EGFL6	5'UTR-island
cg01019600	COAD	0.353905	1.62e-08	0.00612755	X	119125040		IGR-island
cg01046746	COAD	0.113094	7.89e-08	0.0298999	X	150863961		IGR-island
cg01055931	COAD	0.178796	4.38e-10	0.000165926	X	153583236	FLNA	Body-shelf
cg01222180	COAD	0.141698	4.05e-12	1.53e-06	X	150345616	GPR50	Body-island
cg01333849	COAD	0.120314	3.73e-12	1.41e-06	X	118370171	PGRMC1	TSS200-island
cg01523865	COAD	0.286501	6.37e-09	0.00241475	X	136651179	ZIC3	Body-island
cg01540386	COAD	0.142134	5.54e-11	2.1e-05	X	39873535		IGR-island
cg01683788	COAD	0.219351	2.89e-11	1.1e-05	X	11777794	MSL3	5'UTR-shore
cg01730928	COAD	0.272588	2.9e-12	1.1e-06	X	74143801	KIAA2022	5'UTR-shore
cg01776229	COAD	0.142864	1.2e-07	0.0452756	X	82764385	POU3F4	1stExon-island
cg01896298	COAD	0.0843275	8.37e-08	0.0317033	X	69643036	GDPD2	1stExon-opensea
cg01992935	COAD	0.136916	7.34e-10	0.000278132	X	108868271	KCNE1L	1stExon-island
cg02210067	COAD	0.121607	5.3e-08	0.0200824	X	11777709	MSL3	Body-shore
cg02232922	COAD	0.0494151	1.31e-08	0.00494626	X	118532809	SLC25A43	TSS1500-shore
cg02279124	COAD	0.156526	3.96e-08	0.0150132	X	153046894	SRPK3	Body-shore
cg02376524	COAD	0.333708	2.07e-08	0.00783805	X	101967145	GPRASP2	TSS200-island
cg02602528	COAD	0.139556	1.03e-07	0.0390896	X	49028148	PLP2	TSS200-island
cg02770794	COAD	0.185992	1.55e-12	5.88e-07	X	39872204		IGR-island
cg02912158	COAD	0.145155	5.24e-09	0.00198538	X	136649808	ZIC3	1stExon-island
cg02915422	COAD	0.236625	2.15e-17	8.14e-12	X	150863331		IGR-island
cg03161453	COAD	-0.146422	2.01e-09	0.000761098	X	39962049	BCOR	5'UTR-island
cg03202526	COAD	0.257285	7.18e-17	2.72e-11	X	139587311	SOX3	TSS200-island
cg03204600	COAD	0.123596	6.53e-11	2.47e-05	X	62975269	ARHGEF9	TSS1500-shore
cg03267527	COAD	0.177171	5.17e-14	1.96e-08	X	102510314	TCEAL8	TSS200-opensea
cg03273615	COAD	0.189911	1.63e-15	6.18e-10	X	106362373	RBM41	TSS1500-shore
cg03353482	COAD	0.286824	2.06e-11	7.79e-06	X	74743466	ZDHHC15	TSS200-shore
cg03447800	COAD	0.304746	2.58e-10	9.77e-05	X	103499585	ESX1	5'UTR-island
cg03559234	COAD	0.272131	4.88e-09	0.00184944	X	105067054	NRK	Body-island
cg03723123	COAD	0.174779	9.8e-12	3.71e-06	X	55935143		IGR-opensea
cg03817616	COAD	0.112752	5.55e-17	2.1e-11	X	63615495	MTMR8	TSS200-shore
cg04069374	COAD	0.379733	3.42e-11	1.3e-05	X	119445076	FAM70A	Body-island
cg04101819	COAD	-0.0855127	2.21e-08	0.00835965	X	40006699	BCOR	5'UTR-island
cg04128303	COAD	0.30324	6.84e-12	2.59e-06	X	122318829	GRIA3	Body-island
cg04225046	COAD	0.267565	5.74e-27	2.17e-21	X	101906179	GPRASP1	TSS200-island
cg04290452	COAD	0.0786872	4.27e-10	0.000161719	X	118370187	PGRMC1	TSS200-island
cg04300278	COAD	0.318516	3.82e-12	1.45e-06	X	122318890	GRIA3	Body-island
cg04302192	COAD	0.16498	2.17e-19	8.24e-14	X	47341740	ZNF41	5'UTR-shore
cg04721883	COAD	0.310817	1.24e-08	0.00469239	X	103499577	ESX1	5'UTR-island
cg05019001	COAD	0.255193	1.93e-12	7.31e-07	X	66766334	AR	1stExon-shore
cg05074623	COAD	0.162673	6.59e-13	2.5e-07	X	151999750	NSDHL	5'UTR-island
cg05093999	COAD	0.148813	2.11e-09	0.000797705	X	10851789	MID1	1stExon-opensea
cg05106824	COAD	0.280685	5.26e-11	1.99e-05	X	120181294	GLUD2	TSS200-shore
cg05137263	COAD	0.303586	1.34e-17	5.08e-12	X	30327625	NR0B1	TSS200-island
cg05143403	COAD	0.160088	1.63e-12	6.17e-07	X	55744049	RRAGB	TSS200-opensea
cg05193067	COAD	-0.180352	6.78e-11	2.57e-05	X	102602623		IGR-opensea
cg05196026	COAD	0.323074	1.52e-08	0.00576695	X	137793096	FGF13	Body-island
cg05371395	COAD	0.230267	7.74e-08	0.0293153	X	12156894	FRMPD4	5'UTR-island
cg05555050	COAD	0.165193	1.41e-11	5.32e-06	X	103809805	IL1RAPL2	TSS1500-island
cg05563333	COAD	0.233033	3.44e-11	1.3e-05	X	11777722	MSL3	Body-shore
cg05666266	COAD	0.34903	1.21e-13	4.58e-08	X	68725596	FAM155B	1stExon-island
cg05777666	COAD	0.303523	7.45e-08	0.028226	X	103499734	ESX1	TSS200-island
cg05801573	COAD	0.259594	3.77e-16	1.43e-10	X	142722740	SLITRK4	5'UTR-island
cg05832562	COAD	0.181361	7.13e-08	0.0270005	X	100878294	ARMCX3	TSS200-opensea
cg06077978	COAD	0.208774	3.27e-09	0.00123763	X	48690457	PCSK1N	Body-island
cg06099218	COAD	0.12953	7.99e-14	3.03e-08	X	39473248		IGR-island
cg06139288	COAD	0.161545	1.15e-09	0.00043483	X	11683125	ARHGAP6	1stExon-island
cg06152434	COAD	0.273614	3.65e-08	0.0138145	X	139585460	SOX3	3'UTR-shore
cg06267144	COAD	0.208442	4.17e-14	1.58e-08	X	136647760	ZIC3	TSS1500-island
cg06302025	COAD	0.321915	4.29e-22	1.63e-16	X	102000758	BHLHB9	TSS200-island
cg06455206	COAD	0.226591	6.62e-08	0.0250653	X	49643431	USP27X	TSS1500-island
cg06650847	COAD	0.382607	3.62e-12	1.37e-06	X	63004884		IGR-opensea
cg06720669	COAD	0.130448	5.72e-08	0.0216832	X	108868282	KCNE1L	1stExon-island
cg06902764	COAD	0.320081	5.86e-12	2.22e-06	X	139586086	SOX3	1stExon-island
cg06964654	COAD	0.204122	1.19e-09	0.000451486	X	139590383		IGR-island
cg07342016	COAD	0.304678	1.75e-08	0.00664447	X	129306129	RAB33A	1stExon-island
cg07395435	COAD	0.247595	1.92e-08	0.00729188	X	138774080	MCF2	5'UTR-island
cg07419680	COAD	0.160982	5.81e-10	0.000220243	X	134429972	ZNF75D	5'UTR-shore
cg07462256	COAD	0.359958	3.21e-10	0.000121681	X	68725088	FAM155B	1stExon-island
cg07673466	COAD	0.250528	2.5e-09	0.000946319	X	70363469	NLGN3	TSS1500-opensea
cg07681653	COAD	0.173356	2.06e-14	7.79e-09	X	139590479		IGR-island
cg07767690	COAD	0.132074	6.71e-13	2.54e-07	X	54834292	MAGED2	TSS1500-shore
cg07780118	COAD	0.256615	3.76e-10	0.000142464	X	66766506	AR	1stExon-shore
cg07868857	COAD	0.13461	9.48e-11	3.59e-05	X	39473069		IGR-island
cg07869461	COAD	0.231058	2.82e-12	1.07e-06	X	11777744	MSL3	Body-shore
cg07910525	COAD	0.225323	1.5e-09	0.000568586	X	51075582	NUDT10	5'UTR-island
cg07929406	COAD	0.222975	1.33e-10	5.02e-05	X	139587304	SOX3	TSS200-island
cg08156775	COAD	-0.198107	3.57e-17	1.35e-11	X	40009864	BCOR	5'UTR-shore
cg08202860	COAD	0.264698	9.37e-08	0.0354913	X	68725052	FAM155B	TSS200-island
cg08348649	COAD	0.384319	2.72e-08	0.0102932	X	119443387	FAM70A	Body-shore
cg08586423	COAD	0.2759	8.16e-09	0.00309313	X	102508853	TCEAL8	Body-opensea
cg08609270	COAD	0.186181	2.66e-09	0.00100672	X	144903125	SLITRK2	1stExon-island
cg08697944	COAD	0.407776	2.38e-14	9.02e-09	X	51637845	MAGED1	Body-island
cg08761350	COAD	0.271988	5.48e-10	0.000207765	X	101967081	GPRASP2	TSS1500-island
cg08782677	COAD	0.337645	1.59e-12	6.02e-07	X	150346292	GPR50	Body-island
cg09054333	COAD	0.305535	7.24e-11	2.74e-05	X	142723768	SLITRK4	TSS1500-shore
cg09076540	COAD	0.230235	1.25e-12	4.74e-07	X	139590116		IGR-island
cg09092713	COAD	0.326278	1.19e-14	4.51e-09	X	119133965		IGR-island
cg09112156	COAD	0.137832	1.82e-14	6.88e-09	X	140271259	LDOC1	1stExon-island
cg09119688	COAD	0.256227	1.17e-11	4.44e-06	X	119133700		IGR-shore
cg09158774	COAD	0.230409	3.05e-08	0.0115485	X	30326496	NR0B1	1stExon-island
cg09261015	COAD	0.289918	8.69e-08	0.0329237	X	103499647	ESX1	TSS200-island
cg09407917	COAD	0.302519	3.81e-13	1.44e-07	X	130192151	FLJ30058	TSS200-island
cg09418623	COAD	0.301117	7.21e-13	2.73e-07	X	66765795	AR	1stExon-shore
cg09515442	COAD	0.303259	6.6e-11	2.5e-05	X	48689942	PCSK1N	Body-island
cg09559792	COAD	0.12861	8.18e-08	0.030984	X	153627273	RPL10	Body-island
cg09562455	COAD	0.28478	1.14e-14	4.33e-09	X	30327490	NR0B1	5'UTR-island
cg09673206	COAD	0.116911	3.05e-11	1.16e-05	X	130037332	ENOX2	TSS200-shore
cg09687738	COAD	0.132038	5.09e-08	0.0192672	X	113818934	HTR2C	5'UTR-island
cg09720420	COAD	0.320248	1.15e-24	4.35e-19	X	142722174	SLITRK4	5'UTR-island
cg09867302	COAD	0.169482	1.44e-08	0.00546818	X	68048137	EFNB1	TSS1500-shore
cg09975171	COAD	0.198116	2.98e-11	1.13e-05	X	154842841	TMLHE	TSS1500-shore
cg10237576	COAD	0.112596	5.57e-08	0.0211175	X	48455705	WDR13	TSS200-shore
cg10273882	COAD	0.130634	4.14e-10	0.000156688	X	39472958		IGR-island
cg10288278	COAD	0.250013	1.1e-33	4.16e-28	X	142721811	SLITRK4	5'UTR-island
cg10723245	COAD	0.15906	1.39e-21	5.27e-16	X	103401991	MCART6	TSS1500-shore
cg10869581	COAD	0.261849	1.96e-22	7.42e-17	X	102000905	BHLHB9	TSS200-island
cg10926623	COAD	0.149554	5.15e-13	1.95e-07	X	153141065	L1CAM	Body-opensea
cg11049634	COAD	-0.154158	1.03e-07	0.0389943	X	40016121	BCOR	5'UTR-island
cg11193681	COAD	0.112541	1.98e-09	0.000749951	X	118986581	UPF3B	Body-shore
cg11194545	COAD	0.26517	2.45e-13	9.3e-08	X	105066793	NRK	5'UTR-island
cg11272332	COAD	0.289533	7.92e-10	0.000300055	X	74742810	ZDHHC15	1stExon-island
cg11434986	COAD	-0.142628	9.49e-19	3.59e-13	X	39948609	BCOR	5'UTR-shore
cg11441847	COAD	0.113986	6.29e-11	2.38e-05	X	117861165	IL13RA1	TSS1500-shore
cg11618093	COAD	0.117165	4.06e-11	1.54e-05	X	152000347	NSDHL	5'UTR-shore
cg11638117	COAD	0.20253	9.58e-12	3.63e-06	X	139587335	SOX3	TSS200-island
cg12058840	COAD	0.133367	9.4e-08	0.0356188	X	135579744	HTATSF1	5'UTR-island
cg12323723	COAD	0.143537	2.7e-09	0.00102265	X	136656581		IGR-island
cg12377701	COAD	0.199682	1.34e-08	0.00506568	X	75648992	MAGEE1	1stExon-island
cg12453500	COAD	0.141001	1.96e-28	7.44e-23	X	70315455	FOXO4	TSS1500-shore
cg12468189	COAD	0.169215	3.72e-10	0.00014077	X	153046767	SRPK3	Body-island
cg12614912	COAD	0.262454	5.4e-08	0.0204707	X	99664089	PCDH19	1stExon-island
cg12842316	COAD	0.34313	5.85e-23	2.22e-17	X	142723457	SLITRK4	TSS1500-shore
cg13012525	COAD	0.188849	3.21e-09	0.00121723	X	30327547	NR0B1	TSS200-island
cg13204538	COAD	0.271887	3.03e-09	0.00114923	X	119445300	FAM70A	1stExon-shore
cg13217661	COAD	0.109078	6.49e-09	0.00245779	X	136629816		IGR-island
cg13307142	COAD	0.231585	2.96e-09	0.00112238	X	74743056	ZDHHC15	5'UTR-island
cg13367122	COAD	0.300372	1.27e-09	0.000480929	X	152939483	PNCK	1stExon-island
cg13613682	COAD	0.1384	5.04e-10	0.00019094	X	136648553	ZIC3	5'UTR-island
cg13699065	COAD	0.146012	1.17e-08	0.00441659	X	136511500		IGR-shore
cg13775533	COAD	0.111508	7.35e-10	0.000278568	X	99663073	PCDH19	1stExon-island
cg13797960	COAD	0.267418	6.24e-09	0.00236492	X	67906191	STARD8	5'UTR-island
cg13868987	COAD	0.193245	5.49e-09	0.00207919	X	11683131	ARHGAP6	1stExon-island
cg13977434	COAD	0.164541	2.42e-16	9.16e-11	X	68048117	EFNB1	TSS1500-shore
cg14007036	COAD	0.21288	6.77e-09	0.00256569	X	136113725	GPR101	1stExon-island
cg14340500	COAD	0.26952	6.6e-12	2.5e-06	X	142723216	SLITRK4	TSS200-shore
cg14495054	COAD	0.195607	9.93e-08	0.0376248	X	139590253		IGR-island
cg14562990	COAD	0.168296	8.78e-10	0.000332622	X	140271626	LDOC1	TSS1500-shore
cg14752426	COAD	0.303743	1.56e-16	5.92e-11	X	142722095	SLITRK4	5'UTR-island
cg14772068	COAD	0.418679	2.48e-15	9.41e-10	X	55479202	MAGEH1	1stExon-opensea
cg14803417	COAD	0.0994665	3.77e-08	0.0142809	X	39873471		IGR-island
cg14828248	COAD	0.205604	5.02e-08	0.0190306	X	130206946	FLJ30058	5'UTR-island
cg14951132	COAD	0.306514	6.81e-16	2.58e-10	X	105067038	NRK	Body-island
cg15048430	COAD	0.237501	1.85e-12	7.01e-07	X	54384161	WNK3	1stExon-island
cg15452747	COAD	0.242573	4.59e-12	1.74e-06	X	68726029	FAM155B	Body-island
cg15508450	COAD	0.198817	5.44e-12	2.06e-06	X	129194982		IGR-shore
cg15579650	COAD	0.174434	4.06e-16	1.54e-10	X	101906119	GPRASP1	TSS200-island
cg15686826	COAD	0.136197	1.2e-07	0.0455311	X	100183936	XKRX	TSS200-island
cg15691129	COAD	0.339918	5.46e-10	0.000206903	X	68725815	FAM155B	1stExon-island
cg15904427	COAD	0.148057	2.36e-11	8.93e-06	X	133941745	FAM122C	Body-opensea
cg16104634	COAD	0.249395	9.3e-12	3.52e-06	X	30327494	NR0B1	5'UTR-island
cg16359563	COAD	0.152646	2.68e-09	0.00101621	X	64196429	ZC4H2	TSS200-opensea
cg16523424	COAD	0.190147	3.39e-09	0.00128594	X	47441779	SYN1	Body-opensea
cg16653057	COAD	0.324338	1.24e-08	0.00469952	X	74144727	KIAA2022	5'UTR-island
cg16681914	COAD	0.197807	4.96e-12	1.88e-06	X	11777654	MSL3	Body-shore
cg16697940	COAD	0.175408	2.5e-11	9.47e-06	X	140271321	LDOC1	TSS200-island
cg16832275	COAD	0.132492	1.08e-08	0.00411013	X	55744084	RRAGB	TSS200-opensea
cg16870351	COAD	0.329337	1.04e-08	0.00394141	X	136651271	ZIC3	Body-island
cg16946997	COAD	0.169204	9.14e-08	0.0346398	X	51076330	NUDT10	Body-island
cg17084763	COAD	0.194716	2.18e-08	0.00825965	X	68114441		IGR-island
cg17239904	COAD	0.179639	1.22e-20	4.61e-15	X	39872979		IGR-island
cg17242918	COAD	0.262685	8.65e-08	0.0327626	X	119149854		IGR-shore
cg17505944	COAD	0.198913	6.93e-09	0.00262539	X	153671997	FAM50A	TSS1500-shore
cg17509494	COAD	0.201694	8.06e-08	0.0305527	X	74743480	ZDHHC15	TSS200-shore
cg17720011	COAD	0.100089	3.69e-09	0.00139616	X	134049345	MOSPD1	TSS200-shore
cg17814335	COAD	0.18218	2.22e-10	8.41e-05	X	74143945	KIAA2022	5'UTR-island
cg17824401	COAD	0.253567	2.96e-08	0.0112247	X	67906181	STARD8	5'UTR-island
cg17835180	COAD	-0.249857	7.97e-09	0.00301939	X	12995592		IGR-shore
cg17964359	COAD	0.314321	2.79e-10	0.000105712	X	66766254	AR	1stExon-island
cg17974767	COAD	0.257965	2.85e-10	0.000108101	X	48690187	PCSK1N	Body-island
cg18156601	COAD	0.380458	1.11e-21	4.2e-16	X	66766050	AR	1stExon-island
cg18496053	COAD	0.1814	5.32e-09	0.00201404	X	139587868	SOX3	TSS1500-island
cg18515545	COAD	0.155733	6.42e-15	2.43e-09	X	15288312	ASB9	TSS200-opensea
cg18581963	COAD	0.201051	1.47e-11	5.57e-06	X	139587695	SOX3	TSS1500-island
cg18813691	COAD	-0.174335	2.79e-18	1.06e-12	X	40009241	BCOR	5'UTR-shore
cg18834878	COAD	0.203957	5.91e-08	0.0224054	X	105067311	NRK	Body-shore
cg19014767	COAD	0.0516789	1.07e-11	4.04e-06	X	100604147	TIMM8A	TSS1500-shore
cg19180514	COAD	0.349509	1.33e-10	5.04e-05	X	51361516		IGR-island
cg19392138	COAD	0.125478	3.59e-09	0.00136077	X	134479169	ZNF75D	TSS1500-shore
cg19780684	COAD	0.0832751	3.89e-11	1.47e-05	X	15288115	ASB9	1stExon-opensea
cg19792266	COAD	0.367134	2.12e-19	8.04e-14	X	74743023	ZDHHC15	5'UTR-island
cg19881386	COAD	0.217473	6.55e-10	0.000248008	X	30327423	NR0B1	1stExon-island
cg20104776	COAD	0.142344	2.19e-11	8.28e-06	X	140271176	LDOC1	1stExon-island
cg20207108	COAD	0.366231	1.48e-35	5.61e-30	X	101906181	GPRASP1	TSS200-island
cg20271300	COAD	0.302806	1.14e-07	0.0431891	X	137793764	FGF13	Body-island
cg20450764	COAD	0.125453	1.04e-08	0.00395108	X	38420326	TSPAN7	TSS1500-shore
cg20512370	COAD	0.298394	2.74e-08	0.0103834	X	105066357	NRK	TSS200-island
cg20569128	COAD	0.144041	2.59e-13	9.8e-08	X	136656575		IGR-island
cg20780998	COAD	-0.254125	5.52e-09	0.0020915	X	12996931		IGR-shelf
cg20818151	COAD	0.181342	3.42e-14	1.3e-08	X	57618059	ZXDB	TSS1500-shore
cg20881335	COAD	0.159544	3.55e-09	0.00134552	X	14547172	GLRA2	TSS1500-opensea
cg20919227	COAD	0.14426	3.26e-08	0.0123398	X	100663591	GLA	TSS1500-island
cg20981089	COAD	0.272825	9.8e-09	0.00371099	X	139588759		IGR-shore
cg21114800	COAD	0.321965	1.05e-08	0.0039717	X	21393585	CNKSR2	Body-shore
cg21205654	COAD	0.10183	9.16e-15	3.47e-09	X	118110766	LONRF3	Body-shore
cg21248478	COAD	0.179852	9.8e-08	0.0371245	X	154563968	CLIC2	5'UTR-opensea
cg21378039	COAD	0.150236	1.47e-09	0.000557165	X	146994369	ASFMR1	Body-shore
cg21484926	COAD	0.312266	9.75e-10	0.000369198	X	105066912	NRK	Body-island
cg21672057	COAD	0.207321	2.16e-12	8.2e-07	X	74144324	KIAA2022	5'UTR-island
cg21773962	COAD	0.21295	5.31e-08	0.0201087	X	139586310	SOX3	1stExon-island
cg21966410	COAD	0.37447	1.51e-15	5.7e-10	X	66765882	AR	1stExon-shore
cg22306749	COAD	0.264517	8.13e-08	0.0307907	X	101967085	GPRASP2	TSS1500-island
cg22332233	COAD	0.238032	1.48e-08	0.005589	X	48897515	TFE3	Body-shelf
cg22474754	COAD	-0.14729	6.76e-09	0.00256005	X	118327940		IGR-opensea
cg22604777	COAD	0.309731	1.82e-10	6.89e-05	X	55479357	MAGEH1	1stExon-opensea
cg22696549	COAD	0.298851	1.42e-09	0.000537713	X	30327667	NR0B1	TSS200-island
cg22844669	COAD	0.242358	8.56e-09	0.00324356	X	136510760		IGR-island
cg22858728	COAD	0.17263	2.95e-11	1.12e-05	X	154034149	MPP1	TSS1500-shore
cg22903370	COAD	0.179031	1.43e-10	5.4e-05	X	153058860	IDH3G	Body-shore
cg23083269	COAD	0.349516	9.07e-15	3.44e-09	X	150863180		IGR-island
cg23140620	COAD	-0.16599	2.56e-09	0.000969174	X	110398983	PAK3	Body-opensea
cg23208903	COAD	0.284291	2.57e-14	9.73e-09	X	30327487	NR0B1	5'UTR-island
cg23297872	COAD	0.341503	8.08e-27	3.06e-21	X	142721819	SLITRK4	5'UTR-island
cg23575876	COAD	0.246108	1.13e-23	4.3e-18	X	142723112	SLITRK4	TSS200-shore
cg23689428	COAD	-0.117155	1.63e-08	0.00617756	2	121223964	LOC84931	TSS200-opensea
cg23690264	COAD	0.336785	7.03e-33	2.66e-27	X	142721909	SLITRK4	5'UTR-island
cg23708288	COAD	0.186047	4.57e-12	1.73e-06	X	69674800	DLG3	Body-island
cg23709290	COAD	0.359498	1.05e-21	3.98e-16	X	21393508	CNKSR2	Body-shore
cg23862713	COAD	0.192281	7.01e-08	0.026547	X	139587270	SOX3	TSS200-island
cg23892645	COAD	0.127237	6.13e-09	0.00232074	X	118370162	PGRMC1	TSS200-island
cg23909164	COAD	0.232827	6.13e-11	2.32e-05	X	136510526		IGR-island
cg23955842	COAD	0.212009	7.69e-12	2.92e-06	X	150346131	GPR50	Body-island
cg23986186	COAD	0.139287	5.77e-08	0.0218567	X	70585545	BCYRN1	Body-shore
cg24038764	COAD	0.136533	7.63e-14	2.89e-08	X	119379271	CXorf42	TSS200-shore
cg24139895	COAD	0.207178	1.12e-23	4.26e-18	X	108780677	NXT2	Body-shore
cg24596823	COAD	0.141612	1.05e-25	3.96e-20	X	14547320	GLRA2	TSS200-opensea
cg24626756	COAD	0.391606	1.96e-11	7.41e-06	X	68725440	FAM155B	1stExon-island
cg24654385	COAD	0.155127	6.16e-08	0.0233191	X	134049411	MOSPD1	TSS200-shore
cg24818939	COAD	0.17977	3.49e-19	1.32e-13	X	101906109	GPRASP1	TSS200-island
cg25075069	COAD	0.286623	2.89e-08	0.0109376	X	136113964	GPR101	TSS200-island
cg25125864	COAD	0.119112	1.09e-12	4.12e-07	X	49086910	CACNA1F	Body-shore
cg25223408	COAD	0.131378	6.33e-09	0.0023975	X	130207219	FLJ30058	5'UTR-island
cg25237542	COAD	0.240053	2.86e-11	1.09e-05	X	142722494	SLITRK4	5'UTR-island
cg25367647	COAD	0.148647	1.23e-08	0.00464235	X	103401960	MCART6	TSS1500-shore
cg25373998	COAD	0.270271	4.2e-09	0.00159005	X	70363458	NLGN3	TSS1500-opensea
cg25548414	COAD	0.314695	1.39e-10	5.27e-05	X	130192160	FLJ30058	TSS200-island
cg25560327	COAD	0.164651	7.43e-09	0.00281629	X	152127478	ZNF185	Body-island
cg25870731	COAD	0.157853	2.69e-17	1.02e-11	X	140271029	LDOC1	1stExon-island
cg25903474	COAD	0.337106	2.17e-09	0.00082105	X	110039472	CHRDL1	TSS200-shore
cg25987936	COAD	0.333502	3.74e-10	0.000141501	X	66765446	AR	1stExon-shore
cg26267038	COAD	0.386097	7.15e-20	2.71e-14	X	21392988	CNKSR2	1stExon-island
cg26584771	COAD	0.289291	2.04e-09	0.000772348	X	74145551	KIAA2022	TSS1500-shore
cg26695278	COAD	-0.140794	5.58e-15	2.12e-09	X	40010468	BCOR	5'UTR-shore
cg26822438	COAD	0.298642	5.9e-10	0.000223516	X	119134368		IGR-island
cg26943822	COAD	0.278567	1.57e-15	5.96e-10	X	142723713	SLITRK4	TSS1500-shore
cg27076487	COAD	0.141123	3.86e-10	0.000146106	X	140271364	LDOC1	TSS200-island
cg27151711	COAD	0.211363	3.45e-08	0.0130747	X	47441773	SYN1	Body-opensea
cg27296664	COAD	0.184128	1.44e-19	5.45e-14	X	142723114	SLITRK4	TSS200-shore
cg00179446	HNSC	0.121847	7.04e-08	0.0270838	X	118986947	UPF3B	1stExon-island
cg00357087	HNSC	0.169104	2.17e-16	8.34e-11	X	119738550	MCTS1	TSS200-opensea
cg00379371	HNSC	0.116055	1.96e-13	7.55e-08	X	48774742	PIM2	Body-shore
cg00481999	HNSC	0.139613	2.27e-14	8.72e-09	X	47696603	ZNF81	5'UTR-shore
cg00554969	HNSC	0.265778	2.63e-08	0.0101274	X	79278012	TBX22	Body-opensea
cg00724728	HNSC	0.215145	5.71e-09	0.00219516	X	67867238	STARD8	TSS1500-opensea
cg00920960	HNSC	0.111257	1.35e-10	5.21e-05	X	122993419	XIAP	TSS1500-shore
cg01009686	HNSC	0.0808125	1.18e-07	0.0455439	X	77166354	ATP7A	5'UTR-shore
cg01078706	HNSC	0.126197	1.4e-08	0.00538551	X	102024320		IGR-shore
cg01081720	HNSC	0.123668	1.37e-11	5.28e-06	X	68047734	EFNB1	TSS1500-shore
cg01169440	HNSC	0.122926	3.2e-10	0.000123152	X	118603378	SLC25A5	Body-shore
cg01370179	HNSC	0.209635	9.32e-08	0.0358323	X	153218937	HCFC1	Body-island
cg01683788	HNSC	0.140049	1.84e-11	7.07e-06	X	11777794	MSL3	5'UTR-shore
cg01717812	HNSC	0.130207	1.01e-08	0.00388644	X	74376285	ABCB7	TSS200-opensea
cg01747155	HNSC	0.146819	4.02e-09	0.00154577	X	154842516	TMLHE	5'UTR-island
cg01807688	HNSC	0.19394	9.88e-09	0.00380054	X	133680740	MGC16121	TSS200-shore
cg01809408	HNSC	0.320007	5.09e-08	0.019573	X	53112501	TSPYL2	Body-shore
cg01828434	HNSC	0.103542	1.74e-13	6.69e-08	X	106960491	TSC22D3	TSS1500-shore
cg01896298	HNSC	0.138014	5.82e-08	0.0223878	X	69643036	GDPD2	1stExon-opensea
cg01992935	HNSC	0.223896	6.7e-09	0.00257568	X	108868271	KCNE1L	1stExon-island
cg02063752	HNSC	0.195548	1.57e-09	0.000605039	X	47054413	UBA1	5'UTR-shore
cg02120046	HNSC	0.30458	3.77e-08	0.0145069	X	132090860	HS6ST2	Body-island
cg02161824	HNSC	0.118168	1.57e-10	6.05e-05	X	134186388	FAM127B	TSS200-shore
cg02193580	HNSC	0.16583	4.89e-08	0.0187987	X	135251444	FHL1	TSS200-opensea
cg02285579	HNSC	0.279282	1.51e-08	0.00581236	X	106516174		IGR-island
cg02523105	HNSC	0.132479	4.07e-11	1.57e-05	X	134232832	NCRNA00087	TSS200-island
cg03035653	HNSC	0.166992	1.22e-07	0.0468435	X	99662932	PCDH19	1stExon-island
cg03122511	HNSC	0.106427	3.36e-08	0.0129104	X	119077820	NKAP	TSS200-shore
cg03181214	HNSC	0.112984	2.81e-11	1.08e-05	X	100646162	RPL36A	Body-shore
cg03202526	HNSC	0.264253	2.8e-08	0.0107554	X	139587311	SOX3	TSS200-island
cg03350932	HNSC	0.165736	2.26e-09	0.00087035	X	153085101	PDZD4	Body-shore
cg03604519	HNSC	0.16525	6.01e-08	0.0231049	X	70150290	SLC7A3	5'UTR-shore
cg03650842	HNSC	0.228911	7.12e-08	0.0273957	X	63424088	FAM123B	5'UTR-shore
cg03672021	HNSC	0.125323	3.97e-11	1.53e-05	X	153602658	FLNA	5'UTR-shore
cg03723123	HNSC	0.108828	1.87e-10	7.18e-05	X	55935143		IGR-opensea
cg03732411	HNSC	0.151117	7.82e-09	0.00300628	X	136134475		IGR-shore
cg03915527	HNSC	0.257416	3.59e-15	1.38e-09	X	106957793	TSC22D3	Body-shore
cg03927113	HNSC	0.12191	5.18e-20	1.99e-14	X	119738603	MCTS1	Body-opensea
cg04053131	HNSC	0.226068	6.06e-08	0.0232987	X	11140682	HCCS	3'UTR-opensea
cg04101819	HNSC	-0.12689	1.72e-08	0.00661512	X	40006699	BCOR	5'UTR-island
cg04225046	HNSC	0.304773	3.93e-08	0.015115	X	101906179	GPRASP1	TSS200-island
cg04283377	HNSC	0.101466	7.23e-15	2.78e-09	X	47420348	ARAF	TSS200-shore
cg04455030	HNSC	0.147524	1.22e-15	4.69e-10	X	129402160	ZNF280C	5'UTR-shore
cg04486022	HNSC	0.224595	1.22e-07	0.0468028	X	130207446	FLJ30058	5'UTR-island
cg04528545	HNSC	0.331435	6.68e-09	0.00256884	X	36982194		IGR-shore
cg04740028	HNSC	0.134181	1.23e-10	4.72e-05	X	47383436		IGR-island
cg04768312	HNSC	0.108575	8.38e-09	0.00322304	X	70337980	MED12	TSS1500-shore
cg04855977	HNSC	0.088295	2.12e-09	0.000814923	X	128977653	ZDHHC9	TSS200-island
cg04932755	HNSC	0.0581012	2.52e-11	9.69e-06	X	68047893	EFNB1	TSS1500-shore
cg05073171	HNSC	0.117601	7.94e-09	0.00305299	X	134232157	NCRNA00087	Body-shore
cg05127037	HNSC	0.154099	4.22e-09	0.00162298	X	154290180	MTCP1NB	Body-opensea
cg05130312	HNSC	-0.148883	1.31e-08	0.00505635	X	130930098	LOC286467	Body-island
cg05454424	HNSC	-0.070841	5.34e-11	2.05e-05	X	42637578	PPP1R2P9	TSS200-shore
cg05688478	HNSC	0.146899	3.91e-10	0.00015029	X	128789194	APLN	TSS1500-island
cg05695959	HNSC	-0.150047	6.95e-08	0.0267216	X	39867476		IGR-island
cg05707218	HNSC	0.3608	2.17e-08	0.00834965	X	153234476	HCFC1	Body-shore
cg05858130	HNSC	0.190319	1.74e-08	0.00667659	X	48929808	PRAF2	Body-island
cg05895666	HNSC	0.0526506	9.26e-08	0.0356063	X	118532787	SLC25A43	TSS1500-shore
cg05914696	HNSC	0.0908664	1.24e-07	0.0477431	X	68114669		IGR-island
cg06036585	HNSC	0.194233	1.69e-11	6.5e-06	X	70521462	ITGB1BP2	TSS200-opensea
cg06443675	HNSC	0.0923382	4.05e-11	1.56e-05	X	103401820	MCART6	TSS200-shore
cg06482328	HNSC	0.135155	1.23e-08	0.00471952	X	119385834	ZBTB33	5'UTR-island
cg06908232	HNSC	0.126756	2.36e-13	9.06e-08	X	128977816	ZDHHC9	TSS1500-island
cg06920429	HNSC	0.0509929	3.1e-09	0.00119375	X	131353502	RAP2C	TSS1500-shore
cg07004932	HNSC	0.189128	9.74e-08	0.0374545	X	70521489	ITGB1BP2	TSS200-opensea
cg07382899	HNSC	0.099999	4.39e-08	0.0168857	X	128789004	APLN	TSS200-island
cg07673466	HNSC	0.29204	6.58e-13	2.53e-07	X	70363469	NLGN3	TSS1500-opensea
cg07869461	HNSC	0.108326	4.89e-09	0.00188214	X	11777744	MSL3	Body-shore
cg08280623	HNSC	0.12341	1.44e-08	0.00552597	X	71458261	ERCC6L	Body-shore
cg08318837	HNSC	0.227477	4.42e-09	0.00169987	X	48827880	KCND1	1stExon-shore
cg08434396	HNSC	0.108134	9.66e-08	0.0371472	X	146993778	ASFMR1	Body-island
cg08586423	HNSC	0.261412	1.63e-10	6.26e-05	X	102508853	TCEAL8	Body-opensea
cg08587717	HNSC	0.156128	7.5e-16	2.89e-10	X	118709261	UBE2A	Body-shore
cg08758558	HNSC	0.0614622	1.58e-16	6.09e-11	X	45046434	CXorf36	Body-opensea
cg08991015	HNSC	0.135746	3.75e-10	0.00014437	X	134049419	MOSPD1	TSS200-shore
cg09054333	HNSC	0.261272	2.69e-08	0.0103473	X	142723768	SLITRK4	TSS1500-shore
cg09475041	HNSC	-0.152813	1.13e-07	0.0434299	X	138612736	F9	TSS200-opensea
cg09628099	HNSC	0.122073	6.89e-08	0.0264881	X	47863193	ZNF182	5'UTR-shore
cg09655497	HNSC	0.102878	2.01e-08	0.0077391	X	109246283	TMEM164	TSS200-island
cg09673206	HNSC	0.0815941	1.03e-09	0.000396846	X	130037332	ENOX2	TSS200-shore
cg10070741	HNSC	0.197074	9.82e-08	0.0377756	X	153056291	IDH3G	Body-shelf
cg10082114	HNSC	0.117928	1.22e-07	0.047055	X	77041194	ATRX	Body-island
cg10155200	HNSC	0.0899118	8.52e-08	0.0327885	X	70522390	ITGB1BP2	Body-opensea
cg10443532	HNSC	0.147028	1.43e-08	0.00550052	X	136657084		IGR-island
cg10451760	HNSC	0.221714	1.29e-08	0.00497119	X	136649093	ZIC3	1stExon-island
cg10530128	HNSC	0.0945248	4.81e-08	0.0184961	X	48769550	SLC35A2	TSS1500-shore
cg10587989	HNSC	0.209431	1.02e-12	3.93e-07	X	70521525	ITGB1BP2	TSS200-opensea
cg10602162	HNSC	0.204833	4.14e-10	0.000159155	X	153671800	GDI1	3'UTR-shore
cg10723245	HNSC	0.122691	1.64e-17	6.32e-12	X	103401991	MCART6	TSS1500-shore
cg10869581	HNSC	0.262526	1.19e-07	0.0459406	X	102000905	BHLHB9	TSS200-island
cg11143827	HNSC	-0.139932	3.98e-08	0.0152977	X	39961764	BCOR	5'UTR-island
cg11157838	HNSC	0.159414	4.75e-11	1.83e-05	X	68114452		IGR-island
cg11337025	HNSC	0.0940439	4.91e-08	0.018888	X	106361672	RBM41	Body-island
cg11395386	HNSC	0.268391	3.28e-17	1.26e-11	X	153360157	MECP2	Body-shelf
cg11434986	HNSC	-0.111704	2.27e-14	8.75e-09	X	39948609	BCOR	5'UTR-shore
cg11618093	HNSC	0.120744	3.86e-12	1.48e-06	X	152000347	NSDHL	5'UTR-shore
cg11620557	HNSC	-0.130096	5.92e-10	0.000227529	X	39963545	BCOR	5'UTR-island
cg11638117	HNSC	0.274719	1.26e-08	0.00485549	X	139587335	SOX3	TSS200-island
cg11824111	HNSC	0.11806	5.67e-08	0.0217934	X	153990676	DKC1	TSS1500-shore
cg12125741	HNSC	0.117256	4.01e-09	0.00154285	X	103401380	MCART6	5'UTR-shore
cg12453500	HNSC	0.0374064	9.86e-08	0.0379297	X	70315455	FOXO4	TSS1500-shore
cg12543132	HNSC	0.0965194	1.2e-09	0.00046311	X	23761732	ACOT9	TSS1500-shore
cg12753358	HNSC	0.0973453	1.25e-12	4.8e-07	X	68047716	EFNB1	TSS1500-shore
cg12799835	HNSC	0.0989728	5.47e-14	2.1e-08	X	57313034	FAAH2	TSS200-opensea
cg12858650	HNSC	0.0938934	9.92e-09	0.00381703	X	47039497	RBM10	Body-island
cg13204375	HNSC	0.0975375	1.13e-08	0.00434403	X	54466432	TSR2	TSS1500-opensea
cg13217661	HNSC	0.202099	6.8e-10	0.000261507	X	136629816		IGR-island
cg13219667	HNSC	0.244964	9.38e-10	0.000360772	X	153671953	FAM50A	TSS1500-shore
cg13370916	HNSC	0.116786	1.1e-07	0.0422618	X	67867403	STARD8	TSS200-opensea
cg13372830	HNSC	0.115856	3.86e-10	0.0001483	X	47420231	ARAF	TSS1500-shore
cg13402865	HNSC	0.0377792	1.06e-10	4.09e-05	1	206671408		IGR-opensea
cg13606829	HNSC	0.112203	3.11e-10	0.000119645	X	150565921	VMA21	Body-shore
cg13677598	HNSC	0.149546	1.11e-16	4.28e-11	X	69672096	DLG3	TSS200-shelf
cg13741548	HNSC	0.140531	3.54e-08	0.0136009	X	119738453	MCTS1	TSS200-opensea
cg13775533	HNSC	0.207312	4.57e-19	1.76e-13	X	99663073	PCDH19	1stExon-island
cg13984511	HNSC	0.113275	1.81e-10	6.97e-05	X	23760918	ACOT9	Body-shore
cg14001161	HNSC	0.243263	3.3e-09	0.00126897	X	24713101	POLA1	Body-shore
cg14106263	HNSC	0.146159	4.31e-08	0.0165862	X	129535683	RBMX2	TSS1500-shore
cg14230133	HNSC	0.0854247	3.95e-09	0.00151897	X	148587055	IDS	TSS200-shore
cg14233872	HNSC	0.088971	1.25e-08	0.00479121	X	110925365	ALG13	Body-shore
cg14254545	HNSC	0.178918	2.08e-08	0.00799604	X	118717762	UBE2A	3'UTR-opensea
cg14260465	HNSC	-0.132075	1.06e-12	4.06e-07	X	114524264	LUZP4	TSS200-opensea
cg14322166	HNSC	0.135709	3.21e-08	0.0123456	X	70364735	NLGN3	1stExon-opensea
cg14344749	HNSC	0.228768	1.16e-09	0.000446709	X	133929361	FAM122B	Body-shore
cg14603520	HNSC	0.224779	1.15e-09	0.000442284	X	152760248	BGN	TSS200-opensea
cg14743649	HNSC	0.132359	7.31e-08	0.0281041	X	100353353	CENPI	TSS1500-shore
cg14873818	HNSC	0.188439	1.46e-08	0.00560149	X	83757652	HDX	TSS200-opensea
cg15035437	HNSC	0.291656	8.31e-09	0.00319782	X	63005077		IGR-opensea
cg15816181	HNSC	0.205764	2.26e-09	0.000868623	X	82763261	POU3F4	TSS200-shore
cg15864992	HNSC	0.103903	8.32e-08	0.0320164	X	119736432	MCTS1	TSS1500-opensea
cg15904427	HNSC	0.11463	2.95e-09	0.00113416	X	133941745	FAM122C	Body-opensea
cg16049598	HNSC	0.093201	3.48e-12	1.34e-06	X	106243646	MORC4	TSS200-shore
cg16108684	HNSC	0.251604	2.15e-10	8.26e-05	X	125300035	DCAF12L2	TSS200-island
cg16367232	HNSC	0.132278	1.34e-11	5.15e-06	X	129040481	UTP14A	Body-shore
cg16409172	HNSC	0.150449	4.88e-13	1.88e-07	X	20008364	LOC729609	TSS1500-shore
cg16481170	HNSC	0.134718	3.01e-11	1.16e-05	X	74145312	KIAA2022	TSS200-shore
cg16523424	HNSC	0.108916	1.52e-21	5.87e-16	X	47441779	SYN1	Body-opensea
cg16681914	HNSC	0.141656	1.92e-16	7.38e-11	X	11777654	MSL3	Body-shore
cg16798761	HNSC	0.123058	7.94e-15	3.05e-09	X	128674000	OCRL	TSS1500-shore
cg16832275	HNSC	0.116192	1.33e-09	0.000511583	X	55744084	RRAGB	TSS200-opensea
cg17084763	HNSC	0.168716	4.84e-10	0.00018636	X	68114441		IGR-island
cg17398485	HNSC	0.129536	1.56e-09	0.000599164	X	118699448	CXorf56	TSS200-opensea
cg17472432	HNSC	0.0921955	6.91e-08	0.0265702	X	67867429	STARD8	TSS200-opensea
cg17505944	HNSC	0.233919	1.47e-13	5.64e-08	X	153671997	FAM50A	TSS1500-shore
cg17670641	HNSC	0.104861	1.02e-07	0.0391981	X	49023115	MAGIX	3'UTR-shore
cg17830714	HNSC	0.133045	4.9e-09	0.00188417	X	153630330	DNASE1L1	3'UTR-shelf
cg17935021	HNSC	0.150259	7.03e-08	0.0270519	X	101853962	ARMCX5	TSS1500-shore
cg18185554	HNSC	-0.0985602	1.15e-07	0.0443815	14	103294574	TRAF3	5'UTR-opensea
cg18289259	HNSC	0.0960869	1.09e-07	0.0419201	X	100604065	TIMM8A	TSS1500-shore
cg18778986	HNSC	0.0888286	5.12e-09	0.00197013	X	154842064	TMLHE	5'UTR-shore
cg18818432	HNSC	0.083417	9.56e-09	0.00367884	X	100663157	HNRNPH2	TSS200-island
cg18833705	HNSC	0.132808	1.05e-21	4.03e-16	X	134232988	NCRNA00087	TSS1500-island
cg18939543	HNSC	0.142507	4.96e-12	1.91e-06	X	49057013	SYP	TSS1500-shore
cg19014767	HNSC	0.0600725	5.28e-23	2.03e-17	X	100604147	TIMM8A	TSS1500-shore
cg19180514	HNSC	0.342275	2.56e-11	9.86e-06	X	51361516		IGR-island
cg19261513	HNSC	0.146853	5.52e-10	0.000212209	X	47057322	UBA1	5'UTR-shelf
cg19392138	HNSC	0.113035	7.31e-09	0.00281292	X	134479169	ZNF75D	TSS1500-shore
cg19406003	HNSC	0.132167	1.97e-08	0.00757374	X	153029309	PLXNB3	TSS1500-shelf
cg19533991	HNSC	0.195467	7.13e-08	0.027437	X	153671027	GDI1	3'UTR-shore
cg19541913	HNSC	0.130155	3.21e-16	1.23e-10	X	103401494	MCART6	5'UTR-island
cg19548176	HNSC	0.116183	1.39e-09	0.000533955	X	71792488	HDAC8	Body-opensea
cg19618706	HNSC	0.131726	5.51e-09	0.00212142	X	152760906	BGN	5'UTR-opensea
cg19780684	HNSC	0.0938388	7.85e-11	3.02e-05	X	15288115	ASB9	1stExon-opensea
cg19822434	HNSC	0.0961077	1.97e-18	7.56e-13	X	118744347		IGR-shelf
cg19836906	HNSC	0.111232	4.92e-11	1.89e-05	X	118987328	UPF3B	TSS1500-shore
cg20086420	HNSC	0.119724	2.01e-16	7.75e-11	X	48620337	GLOD5	Body-opensea
cg20289741	HNSC	0.11045	1.83e-09	0.000702615	X	128977498	ZDHHC9	TSS200-island
cg20291321	HNSC	0.222894	2.7e-17	1.04e-11	X	36981602		IGR-island
cg20569128	HNSC	0.221092	2.22e-08	0.00854154	X	136656575		IGR-island
cg20648463	HNSC	0.0311102	8.7e-08	0.0334828	X	100662775	HNRNPH2	TSS1500-shore
cg20818151	HNSC	0.142088	3.45e-13	1.33e-07	X	57618059	ZXDB	TSS1500-shore
cg21205654	HNSC	0.0661966	3.07e-09	0.001182	X	118110766	LONRF3	Body-shore
cg21361971	HNSC	-0.0864045	5.27e-09	0.00202882	X	114546624		IGR-island
cg21378039	HNSC	0.136463	5.77e-14	2.22e-08	X	146994369	ASFMR1	Body-shore
cg21380860	HNSC	0.260407	1.33e-11	5.13e-06	X	106958499	TSC22D3	Body-shore
cg21517121	HNSC	0.136965	3.31e-10	0.000127266	X	48366924	PORCN	TSS1500-shore
cg21595968	HNSC	0.151797	2.58e-09	0.000991538	X	150396241		IGR-island
cg21797452	HNSC	-0.116451	1.62e-09	0.000621829	X	130929940	LOC286467	Body-island
cg21988739	HNSC	0.123417	1.8e-08	0.00690707	X	100353462	CENPI	TSS1500-shore
cg22223709	HNSC	-0.127676	4.65e-13	1.79e-07	X	42637305	PPP1R2P9	Body-island
cg22332233	HNSC	0.227109	2.39e-35	9.19e-30	X	48897515	TFE3	Body-shelf
cg22404117	HNSC	0.131075	1.45e-08	0.00559215	X	100353450	CENPI	TSS1500-shore
cg22959512	HNSC	0.152094	4.48e-08	0.0172288	X	53251773	KDM5C	Body-shelf
cg22975791	HNSC	0.120677	2.13e-15	8.18e-10	X	55934874		IGR-opensea
cg23157067	HNSC	0.154537	4.39e-10	0.000168799	X	105855386	CXorf57	1stExon-shore
cg23245720	HNSC	0.153691	1.61e-08	0.00620946	X	133680549	MGC16121	Body-island
cg23299641	HNSC	0.163136	1.03e-08	0.00395553	X	108868237	KCNE1L	1stExon-island
cg23391060	HNSC	0.141458	6.48e-26	2.49e-20	X	153029535	PLXNB3	TSS200-shelf
cg23497752	HNSC	0.109103	2.49e-09	0.000959115	X	153598077	FLNA	Body-shore
cg23677911	HNSC	0.0708462	8.46e-08	0.0325406	1	230256394	GALNT2	Body-opensea
cg23722334	HNSC	0.257137	6.58e-08	0.0252953	X	106515943		IGR-island
cg23986186	HNSC	0.101542	1.57e-08	0.00604437	X	70585545	BCYRN1	Body-shore
cg23991947	HNSC	0.123594	1.83e-09	0.000703616	X	48397845	TBC1D25	TSS1500-island
cg24052239	HNSC	0.141116	1.1e-09	0.000421632	X	49087465	CACNA1F	Body-island
cg24139895	HNSC	0.101563	1.64e-09	0.000629268	X	108780677	NXT2	Body-shore
cg24691854	HNSC	0.165113	3.32e-08	0.0127804	X	139593162		IGR-island
cg24818939	HNSC	0.324116	3e-08	0.011536	X	101906109	GPRASP1	TSS200-island
cg24844608	HNSC	0.114606	1.51e-08	0.00581406	X	11129831	HCCS	5'UTR-shore
cg24978383	HNSC	0.367266	1.78e-08	0.0068287	X	64254961		IGR-island
cg25223408	HNSC	0.224835	9.72e-09	0.00373706	X	130207219	FLJ30058	5'UTR-island
cg25367647	HNSC	0.15431	2.97e-21	1.14e-15	X	103401960	MCART6	TSS1500-shore
cg25373998	HNSC	0.279136	3.35e-10	0.000128838	X	70363458	NLGN3	TSS1500-opensea
cg25492574	HNSC	0.138891	4.82e-12	1.86e-06	X	153194172		IGR-shore
cg25514427	HNSC	0.153721	2.51e-11	9.64e-06	X	122994594	XIAP	5'UTR-shore
cg25547663	HNSC	0.0873706	6.03e-09	0.00231832	X	48456173	WDR13	TSS200-island
cg25729795	HNSC	0.164187	1.27e-09	0.000489764	X	130216901	FLJ30058	Body-island
cg25852925	HNSC	0.121375	5.34e-11	2.05e-05	X	149531527		IGR-island
cg25875683	HNSC	0.0879301	1.36e-08	0.00523233	X	153029722	PLXNB3	5'UTR-shelf
cg25988710	HNSC	0.206419	1.87e-10	7.19e-05	X	72667379	CDX4	1stExon-island
cg26327984	HNSC	-0.0986444	3.24e-13	1.25e-07	X	42637506	PPP1R2P9	TSS200-shore
cg26335568	HNSC	0.152712	6.7e-08	0.0257659	X	55026135	APEX2	TSS1500-shore
cg26375421	HNSC	0.0967233	9.14e-13	3.52e-07	X	106243592	MORC4	TSS200-island
cg26602702	HNSC	0.0872115	6e-11	2.31e-05	X	153316012	MECP2	Body-opensea
cg27151711	HNSC	0.104692	1.04e-12	3.99e-07	X	47441773	SYN1	Body-opensea
cg27387615	HNSC	0.166223	4.89e-11	1.88e-05	X	136627957		IGR-shore
cg27419400	HNSC	0.105412	8.88e-13	3.42e-07	X	74376313	ABCB7	TSS200-opensea
cg27559462	HNSC	0.106504	8.55e-08	0.0328994	X	118709227	UBE2A	Body-island
cg00016934	KIRC	-0.164031	1.94e-18	7.65e-13	X	40035961	BCOR	5'UTR-island
cg00112256	KIRC	0.057354	6.26e-08	0.0247012	X	117629928	DOCK11	5'UTR-island
cg00167275	KIRC	-0.0759478	6.82e-15	2.69e-09	10	88854588	FAM35A	TSS1500-island
cg00206332	KIRC	-0.153175	6.34e-10	0.000250093	X	151140984	GABRE	Body-shore
cg00240113	KIRC	0.159161	7.88e-15	3.11e-09	X	136648241	ZIC3	TSS200-island
cg00241907	KIRC	-0.0817977	1.03e-10	4.08e-05	X	12993156	TMSB4X	TSS200-island
cg00328965	KIRC	-0.0865441	6.43e-10	0.00025399	X	129243062	ELF4	5'UTR-shore
cg00337921	KIRC	0.0795214	7.57e-09	0.00298659	X	129091288		IGR-island
cg00360365	KIRC	-0.0790737	9.55e-12	3.77e-06	X	54556536	GNL3L	TSS200-island
cg00366674	KIRC	0.0987753	8.7e-08	0.0343267	X	49686431	CLCN5	TSS1500-shore
cg00379371	KIRC	0.113915	1.4e-20	5.54e-15	X	48774742	PIM2	Body-shore
cg00408231	KIRC	-0.13712	5.24e-45	2.07e-39	X	100807848	ARMCX1	5'UTR-island
cg00412554	KIRC	0.173643	1.62e-12	6.41e-07	X	117107719	KLHL13	5'UTR-opensea
cg00433220	KIRC	0.0854358	7.6e-10	0.000299974	X	46697120	RP2	Body-shore
cg00473354	KIRC	0.0449529	7.09e-11	2.8e-05	X	48334413	FTSJ1	TSS200-island
cg00478198	KIRC	0.0588922	1.35e-11	5.35e-06	X	49644500	LOC158572	TSS1500-island
cg00481999	KIRC	0.0864169	2.12e-10	8.36e-05	X	47696603	ZNF81	5'UTR-shore
cg00525383	KIRC	0.160737	1.11e-09	0.000439463	X	136647793	ZIC3	TSS1500-island
cg00581583	KIRC	0.0567834	1.05e-07	0.0415391	X	49047791	SYP	3'UTR-shore
cg00593243	KIRC	-0.153714	2.1e-08	0.00827787	5	172196153	DUSP1	Body-shore
cg00645049	KIRC	0.0418768	6.55e-08	0.0258566	X	153656930	ATP6AP1	TSS200-island
cg00658396	KIRC	-0.125513	8.67e-09	0.00342317	X	3630619	PRKX	Body-island
cg00690049	KIRC	0.0789921	2.98e-08	0.0117474	X	54834244	MAGED2	TSS1500-shore
cg00723034	KIRC	0.065079	1.39e-10	5.49e-05	X	75393425	CXorf26	Body-opensea
cg00724728	KIRC	0.19894	1.37e-37	5.43e-32	X	67867238	STARD8	TSS1500-opensea
cg00787015	KIRC	0.101275	2.33e-15	9.22e-10	X	40506177	CXorf38	Body-island
cg00810519	KIRC	0.0608766	2.73e-09	0.00107591	X	48769107	SLC35A2	5'UTR-island
cg00829575	KIRC	0.0719442	4.12e-08	0.0162643	X	38663062	MID1IP1	5'UTR-island
cg00832270	KIRC	0.0672257	1.59e-11	6.29e-06	X	77359535	PGK1	TSS200-island
cg00839572	KIRC	0.0244279	1.05e-09	0.000413442	X	68047847	EFNB1	TSS1500-shore
cg00869298	KIRC	0.125399	1.39e-08	0.00548595	X	119004292	NDUFA1	TSS1500-shore
cg00878023	KIRC	0.131835	1.32e-08	0.0052068	X	21392544	CNKSR2	1stExon-island
cg00936342	KIRC	0.0803581	2.33e-10	9.2e-05	X	100306566	TRMT2B	5'UTR-shore
cg00963467	KIRC	0.0674497	1.53e-09	0.000604252	X	150151737	HMGB3	TSS200-island
cg00988678	KIRC	0.0632822	6.69e-13	2.64e-07	X	119005603	RNF113A	5'UTR-island
cg01046746	KIRC	0.139574	8.18e-08	0.0322777	X	150863961		IGR-island
cg01055931	KIRC	0.050696	2.36e-14	9.3e-09	X	153583236	FLNA	Body-shelf
cg01081720	KIRC	0.128707	8.07e-32	3.18e-26	X	68047734	EFNB1	TSS1500-shore
cg01191902	KIRC	0.0680047	1.1e-07	0.0435834	X	48931851	PRAF2	TSS200-island
cg01244877	KIRC	-0.0719712	3.08e-09	0.00121767	X	153598902	FLNA	Body-island
cg01303569	KIRC	0.0551622	6.3e-10	0.000248836	X	48755020	TIMM17B	Body-island
cg01370179	KIRC	0.110691	2.45e-17	9.68e-12	X	153218937	HCFC1	Body-island
cg01383599	KIRC	-0.0896509	1.35e-10	5.32e-05	X	25020151		IGR-shore
cg01396530	KIRC	-0.154107	4.7e-12	1.86e-06	X	12974262		IGR-opensea
cg01405303	KIRC	0.0509381	3.22e-10	0.000127095	X	152066574		IGR-island
cg01430241	KIRC	0.0730217	1.31e-08	0.00518684	X	153665714	GDI1	Body-island
cg01445307	KIRC	0.0863576	3.72e-14	1.47e-08	X	21959520	SMS	Body-island
cg01462040	KIRC	0.0647965	2.73e-08	0.0107644	X	147582071	AFF2	TSS200-island
cg01473187	KIRC	0.0980044	1.46e-08	0.00575852	X	99891162	TSPAN6	Body-shore
cg01490258	KIRC	-0.117302	1.97e-08	0.00776146	X	40030456	BCOR	5'UTR-shore
cg01538344	KIRC	0.16613	1.25e-10	4.92e-05	X	100546291	TAF7L	1stExon-island
cg01543116	KIRC	-0.0746525	3.51e-09	0.00138395	X	100184268	XKRX	TSS1500-island
cg01669374	KIRC	-0.089225	1.91e-09	0.00075246	X	12809328	PRPS2	TSS200-shore
cg01683788	KIRC	0.0860478	1.47e-10	5.81e-05	X	11777794	MSL3	5'UTR-shore
cg01716666	KIRC	0.0599025	8.42e-08	0.0332262	X	119077648	NKAP	1stExon-island
cg01717812	KIRC	0.0779954	6.31e-11	2.49e-05	X	74376285	ABCB7	TSS200-opensea
cg01732428	KIRC	-0.0526151	1.18e-08	0.00464635	X	16730881	CTPS2	TSS1500-island
cg01747155	KIRC	0.118599	2.83e-16	1.12e-10	X	154842516	TMLHE	5'UTR-island
cg01755224	KIRC	-0.145517	2.96e-13	1.17e-07	X	10586775	MID1	5'UTR-shore
cg01757402	KIRC	-0.0510538	1.11e-08	0.00436222	X	103810984	IL1RAPL2	TSS200-shore
cg01804836	KIRC	0.0643508	8.44e-08	0.0333318	X	102565738	BEX2	1stExon-island
cg01817069	KIRC	0.117793	8.83e-11	3.49e-05	X	129086975		IGR-island
cg01824095	KIRC	0.0947355	4.21e-08	0.0166333	X	40481859		IGR-shore
cg01828474	KIRC	0.183435	3.14e-09	0.00123919	X	21676593	KLHL34	TSS200-island
cg01850541	KIRC	0.115649	1e-29	3.97e-24	X	67867448	STARD8	TSS200-opensea
cg01853665	KIRC	-0.142538	1.17e-16	4.63e-11	14	21055941	RNASE11	5'UTR-opensea
cg01869765	KIRC	0.0639378	1.9e-09	0.000748241	X	47862977	ZNF182	5'UTR-shore
cg01896298	KIRC	0.088646	1.71e-12	6.74e-07	X	69643036	GDPD2	1stExon-opensea
cg01918534	KIRC	-0.0869211	1.35e-13	5.35e-08	X	118828926		IGR-shore
cg02035866	KIRC	-0.103678	2.52e-11	9.95e-06	X	19002442	PHKA2	1stExon-island
cg02061213	KIRC	0.126876	2.33e-11	9.2e-06	X	107068771	MID2	TSS1500-shore
cg02079156	KIRC	0.0469141	1.61e-08	0.00635654	X	49031585		IGR-shore
cg02129889	KIRC	0.0847946	4.04e-10	0.000159619	X	118925789	RPL39	TSS200-island
cg02195366	KIRC	0.0565244	9.08e-08	0.0358333	X	11776368	MSL3	5'UTR-island
cg02232922	KIRC	0.0628656	2.26e-14	8.93e-09	X	118532809	SLC25A43	TSS1500-shore
cg02233493	KIRC	0.17195	4.24e-13	1.67e-07	X	130217383	FLJ30058	Body-shore
cg02266197	KIRC	0.0842964	4.9e-09	0.00193263	X	133370918	CCDC160	TSS200-shore
cg02293258	KIRC	-0.0644991	4.89e-10	0.000193124	X	57147872	SPIN2B	5'UTR-island
cg02333283	KIRC	0.0636892	3.16e-11	1.25e-05	X	153707099	LAGE3	1stExon-island
cg02501924	KIRC	0.080296	1.18e-12	4.65e-07	X	99891813	TSPAN6	TSS200-shore
cg02523105	KIRC	0.0949038	6.38e-15	2.52e-09	X	134232832	NCRNA00087	TSS200-island
cg02538330	KIRC	-0.0646628	2.15e-09	0.000847295	X	47004146	NDUFB11	Body-island
cg02543363	KIRC	-0.112486	9.08e-12	3.58e-06	X	129252577		IGR-shore
cg02590287	KIRC	-0.151103	1.2e-17	4.72e-12	X	106161451	CLDN2	5'UTR-opensea
cg02621658	KIRC	0.0732395	4.89e-08	0.0193164	X	67867676	STARD8	1stExon-opensea
cg02634083	KIRC	0.0734431	1.5e-12	5.93e-07	X	150153136	HMGB3	5'UTR-shore
cg02649608	KIRC	0.0501863	4.68e-08	0.0184931	X	119384792	ZBTB33	5'UTR-island
cg02710173	KIRC	-0.141335	2.28e-17	8.98e-12	X	153603482	FLNA	TSS1500-shore
cg02723311	KIRC	-0.0319445	9.06e-08	0.03575	X	13707135	RAB9A	TSS1500-island
cg02732801	KIRC	0.0661221	4.74e-09	0.00187158	X	152066328		IGR-island
cg02775175	KIRC	0.0577205	1.92e-08	0.00759214	X	68048001	EFNB1	TSS1500-shore
cg02779592	KIRC	-0.147477	7.32e-12	2.89e-06	X	99899134	SRPX2	TSS200-opensea
cg02799972	KIRC	-0.10947	1.41e-09	0.000558207	X	47383109		IGR-island
cg02805922	KIRC	0.108014	1.82e-08	0.00717115	X	64255552		IGR-shore
cg02810043	KIRC	-0.0658344	1.69e-08	0.0066615	X	9433103	TBL1X	TSS200-island
cg02864732	KIRC	0.0978505	5.03e-08	0.0198631	X	130192365	FLJ30058	1stExon-island
cg02921434	KIRC	0.0698179	2.73e-13	1.08e-07	X	146993433	ASFMR1	Body-island
cg02929371	KIRC	-0.0800681	2.14e-09	0.000843921	X	43741601	MAOB	1stExon-island
cg02944422	KIRC	-0.0716109	1.24e-07	0.0488516	X	47696228	ZNF81	TSS200-island
cg02977829	KIRC	-0.0391813	3.87e-08	0.0152654	X	40482442		IGR-island
cg03003060	KIRC	-0.0914128	3.89e-08	0.0153612	X	13956166	GPM6B	Body-island
cg03035653	KIRC	0.143247	1.36e-09	0.000538406	X	99662932	PCDH19	1stExon-island
cg03048084	KIRC	-0.1024	2.11e-10	8.33e-05	X	16888622	RBBP7	TSS200-island
cg03056849	KIRC	0.0542403	2.65e-10	0.000104496	X	149861683	MTMR1	TSS200-opensea
cg03128268	KIRC	0.119118	1.17e-13	4.63e-08	X	48432279	RBM3	TSS1500-shore
cg03166428	KIRC	0.152907	4.84e-10	0.000190949	X	152760167	BGN	TSS200-opensea
cg03177323	KIRC	-0.0835407	6.62e-09	0.00261148	X	153236770	HCFC1	1stExon-island
cg03188519	KIRC	0.189252	1.51e-08	0.00596178	X	10851838	MID1	TSS200-opensea
cg03219705	KIRC	0.0437803	3.2e-10	0.000126215	X	38420578	TSPAN7	TSS200-island
cg03245429	KIRC	-0.0504308	2.56e-09	0.00101187	X	114524308	LUZP4	1stExon-opensea
cg03267527	KIRC	0.0984195	5.32e-14	2.1e-08	X	102510314	TCEAL8	TSS200-opensea
cg03278754	KIRC	0.0602278	7.41e-10	0.000292343	X	50553629	SHROOM4	Body-shelf
cg03323167	KIRC	0.0716727	6.23e-21	2.46e-15	X	152617344	ZNF275	3'UTR-shelf
cg03465562	KIRC	-0.130707	3.41e-13	1.35e-07	X	19001031	PHKA2	Body-shore
cg03513471	KIRC	0.0438371	3.36e-08	0.0132643	X	146993485	ASFMR1	Body-island
cg03597143	KIRC	0.148373	3.07e-08	0.0121096	1	46767790	LRRC41	Body-island
cg03650842	KIRC	0.116482	5.13e-17	2.03e-11	X	63424088	FAM123B	5'UTR-shore
cg03664928	KIRC	0.12933	4.14e-10	0.000163339	X	53029937		IGR-island
cg03675615	KIRC	-0.141972	7.82e-09	0.00308522	X	49593824	PAGE4	TSS200-opensea
cg03683587	KIRC	-0.0736841	4.54e-08	0.017933	X	50557066	SHROOM4	TSS200-island
cg03705894	KIRC	0.0594249	2.91e-08	0.0114711	X	49687068	CLCN5	TSS200-island
cg03717198	KIRC	-0.0729024	1.55e-11	6.11e-06	X	20285056	RPS6KA3	TSS1500-island
cg03717635	KIRC	-0.0702245	4.93e-11	1.95e-05	X	13586855	EGFL6	TSS1500-shore
cg03723123	KIRC	0.0709577	6.75e-09	0.00266592	X	55935143		IGR-opensea
cg03728850	KIRC	-0.0721872	1.08e-08	0.00424364	X	55515614	USP51	1stExon-shore
cg03732411	KIRC	0.0979644	1.81e-12	7.14e-07	X	136134475		IGR-shore
cg03752015	KIRC	-0.0741145	1.36e-08	0.00537589	X	71526944	CITED1	TSS1500-island
cg03754195	KIRC	-0.0635914	5.75e-08	0.0226862	X	119694964	CUL4B	Body-island
cg03759948	KIRC	0.0771033	6.93e-15	2.74e-09	X	48555275	SUV39H1	Body-island
cg03765898	KIRC	0.178248	3.35e-11	1.32e-05	X	49691109	CLCN5	Body-shelf
cg03773146	KIRC	0.0638764	1.18e-08	0.00464069	X	129114634		IGR-island
cg03800724	KIRC	0.0691294	4.82e-08	0.0190372	X	53253348	KDM5C	Body-shore
cg03811055	KIRC	-0.122136	2.36e-17	9.33e-12	X	16888211	RBBP7	1stExon-island
cg03817616	KIRC	0.0441381	1.35e-08	0.0053341	X	63615495	MTMR8	TSS200-shore
cg03823092	KIRC	0.0599084	7.57e-08	0.029872	X	99891789	TSPAN6	5'UTR-island
cg03908845	KIRC	0.14645	4.95e-10	0.000195458	X	138724737	MCF2	1stExon-opensea
cg03927113	KIRC	0.0964641	9.85e-12	3.89e-06	X	119738603	MCTS1	Body-opensea
cg03971469	KIRC	-0.0563151	3.25e-10	0.000128175	X	25031338	ARX	Body-island
cg04031645	KIRC	-0.0846771	3.66e-14	1.44e-08	X	53713676	HUWE1	TSS200-island
cg04037732	KIRC	0.0897664	4.95e-10	0.00019555	X	70364775	NLGN3	1stExon-opensea
cg04101819	KIRC	-0.0778008	2.67e-15	1.06e-09	X	40006699	BCOR	5'UTR-island
cg04126866	KIRC	-0.117703	8.46e-08	0.0334066	10	85932763	C10orf99	TSS1500-opensea
cg04300278	KIRC	0.0957052	2.84e-10	0.000111943	X	122318890	GRIA3	Body-island
cg04302192	KIRC	0.068915	4.74e-11	1.87e-05	X	47341740	ZNF41	5'UTR-shore
cg04317640	KIRC	0.0558001	1.92e-09	0.000756995	X	73640431	SLC16A2	TSS1500-island
cg04345928	KIRC	0.0867731	1.33e-17	5.25e-12	X	38420783	TSPAN7	1stExon-island
cg04413754	KIRC	-0.0779706	9.79e-08	0.0386525	X	39956558	BCOR	5'UTR-island
cg04483797	KIRC	-0.0964416	5.8e-09	0.00228964	X	102883838	TCEAL1	TSS200-shore
cg04484695	KIRC	-0.1098	8.31e-11	3.28e-05	X	43742501	MAOB	TSS1500-shore
cg04493740	KIRC	0.069173	2.73e-08	0.0107738	X	129474199	SLC25A14	5'UTR-shore
cg04528545	KIRC	0.132033	2.71e-10	0.000106891	X	36982194		IGR-shore
cg04552106	KIRC	0.0693495	1.62e-12	6.4e-07	X	146993425	ASFMR1	Body-island
cg04586456	KIRC	0.0718676	1.44e-10	5.67e-05	X	46696297	RP2	TSS200-island
cg04602218	KIRC	-0.0679591	2.92e-08	0.0115078	X	118533786	SLC25A43	Body-island
cg04624564	KIRC	-0.103515	8.47e-20	3.34e-14	X	73325368	NCRNA00182	Body-island
cg04653083	KIRC	0.0768158	1.89e-10	7.46e-05	X	118827004	2024-09-06	Body-island
cg04747879	KIRC	0.0592931	5.45e-08	0.0215117	X	70288391	SNX12	TSS200-shore
cg04821091	KIRC	0.0936422	1.34e-10	5.3e-05	X	129473898	SLC25A14	TSS200-island
cg04860194	KIRC	0.134424	2.21e-09	0.000873814	X	73524694	ZCCHC13	1stExon-shore
cg04882894	KIRC	0.0774283	4.21e-08	0.0166213	X	130423289	IGSF1	5'UTR-opensea
cg04886769	KIRC	0.122009	2.43e-23	9.6e-18	X	70435029	BCYRN1	Body-opensea
cg04918728	KIRC	-0.0637062	1.82e-14	7.18e-09	X	18845875	PPEF1	3'UTR-opensea
cg04924696	KIRC	-0.0784514	2.04e-10	8.04e-05	X	23925746	CXorf58	TSS1500-island
cg04926827	KIRC	-0.117901	1.52e-13	6.01e-08	X	109246494	TMEM164	5'UTR-island
cg05032353	KIRC	-0.124205	4.81e-12	1.9e-06	X	128674224	OCRL	TSS200-island
cg05073171	KIRC	0.071812	8.6e-12	3.39e-06	X	134232157	NCRNA00087	Body-shore
cg05093999	KIRC	0.217082	1.97e-11	7.77e-06	X	10851789	MID1	1stExon-opensea
cg05096731	KIRC	-0.105515	1.55e-13	6.13e-08	X	9754594	SHROOM2	1stExon-island
cg05100268	KIRC	-0.182667	3.56e-24	1.4e-18	X	153640967	DNASE1L1	TSS1500-shore
cg05114100	KIRC	-0.0805246	2.15e-08	0.00847582	X	114524286	LUZP4	TSS200-opensea
cg05134041	KIRC	0.217846	9.14e-20	3.61e-14	X	82763219	POU3F4	TSS200-shore
cg05143403	KIRC	0.0598004	5.43e-08	0.0214525	X	55744049	RRAGB	TSS200-opensea
cg05147108	KIRC	-0.104481	1.72e-10	6.81e-05	X	128674369	OCRL	5'UTR-island
cg05152874	KIRC	-0.0691579	8.17e-09	0.0032265	X	50557122	SHROOM4	TSS200-island
cg05184682	KIRC	-0.0994439	1.89e-14	7.46e-09	X	21857796	MBTPS2	5'UTR-island
cg05185504	KIRC	0.0876649	3.56e-09	0.00140683	X	119443687	FAM70A	Body-shore
cg05280762	KIRC	0.157095	8.25e-15	3.26e-09	X	107315331	VSIG1	Body-opensea
cg05345404	KIRC	-0.128139	7.5e-16	2.96e-10	X	53468666		IGR-island
cg05374090	KIRC	0.0611831	6.63e-12	2.62e-06	X	152864599	FAM58A	5'UTR-island
cg05393376	KIRC	0.103243	6.27e-21	2.48e-15	X	53467938		IGR-shore
cg05400670	KIRC	0.166887	1.23e-26	4.87e-21	X	67867332	STARD8	TSS200-opensea
cg05438092	KIRC	0.0452183	1.36e-08	0.00537415	X	153603066	FLNA	TSS200-island
cg05444994	KIRC	0.181162	2.58e-10	0.00010204	X	21392324	CNKSR2	TSS1500-island
cg05454424	KIRC	-0.0877814	3.47e-28	1.37e-22	X	42637578	PPP1R2P9	TSS200-shore
cg05456652	KIRC	-0.0694767	1.54e-12	6.1e-07	X	34960884	FAM47B	TSS200-shore
cg05464374	KIRC	-0.0470389	2.38e-08	0.00937759	X	71525859	CITED1	5'UTR-island
cg05555725	KIRC	-0.164098	1.28e-18	5.06e-13	X	135251416	FHL1	TSS200-opensea
cg05572834	KIRC	-0.0744352	4.44e-11	1.75e-05	X	16730380	CTPS2	TSS200-island
cg05688478	KIRC	0.10125	2.49e-12	9.81e-07	X	128789194	APLN	TSS1500-island
cg05692422	KIRC	-0.0475463	2.83e-08	0.0111743	X	42637044	PPP1R2P9	Body-island
cg05695959	KIRC	-0.0768467	1.63e-08	0.00643433	X	39867476		IGR-island
cg05706696	KIRC	-0.179687	1.98e-19	7.82e-14	X	129254556		IGR-island
cg05707815	KIRC	0.0838627	1e-09	0.00039621	X	71934233	PHKA1	TSS1500-island
cg05782106	KIRC	-0.0911189	3.69e-09	0.00145719	X	9754927	SHROOM2	Body-island
cg05786601	KIRC	0.071248	3.2e-09	0.00126176	X	66764126	AR	1stExon-shore
cg05804339	KIRC	-0.0682411	3.43e-08	0.0135346	X	40036023	BCOR	5'UTR-shore
cg05806018	KIRC	0.078396	2.64e-10	0.000104213	X	147582520	AFF2	1stExon-island
cg05872222	KIRC	-0.0501052	8.27e-09	0.00326271	X	71459071	ERCC6L	TSS1500-island
cg05872808	KIRC	0.0567374	1.05e-08	0.00416029	X	153657411	ATP6AP1	Body-shore
cg05893300	KIRC	0.227443	6.19e-10	0.000244483	1	46767565	LRRC41	Body-island
cg05895666	KIRC	0.0931895	2.16e-22	8.51e-17	X	118532787	SLC25A43	TSS1500-shore
cg05911704	KIRC	-0.0885327	1.81e-08	0.00713774	X	129304869	RAB33A	TSS1500-shore
cg05935584	KIRC	0.0699754	4e-09	0.00157943	X	150151823	HMGB3	1stExon-island
cg05961595	KIRC	-0.0657532	5.8e-08	0.0228798	X	55026485	APEX2	TSS1500-island
cg05967389	KIRC	0.0872534	6.83e-08	0.0269585	X	40948142	USP9X	5'UTR-shelf
cg06000876	KIRC	0.0984894	1.33e-09	0.000523595	X	153219435	HCFC1	Body-shore
cg06053110	KIRC	-0.0540786	2.01e-10	7.94e-05	X	51636681	MAGED1	5'UTR-shore
cg06084034	KIRC	-0.101304	2.19e-08	0.00864768	X	153637827	DNASE1L1	5'UTR-shore
cg06104510	KIRC	-0.0739752	2.92e-11	1.15e-05	X	19002482	PHKA2	TSS200-island
cg06135650	KIRC	-0.0567717	2.39e-08	0.00944427	X	38662916	MID1IP1	5'UTR-island
cg06158088	KIRC	0.0446091	4.96e-10	0.000195865	X	47518504	LOC100133957	Body-island
cg06174815	KIRC	0.0550728	4.69e-09	0.00185001	X	147582133	AFF2	TSS200-shore
cg06297686	KIRC	0.0487292	8.32e-08	0.0328275	X	48755002	TIMM17B	Body-island
cg06300944	KIRC	-0.0969771	1.04e-08	0.00411108	X	153141270	L1CAM	1stExon-opensea
cg06308344	KIRC	0.0634941	3.13e-08	0.0123439	X	53584277	MIR98	TSS1500-opensea
cg06407366	KIRC	-0.0347785	4.05e-08	0.0159983	X	13707511	RAB9A	5'UTR-island
cg06408301	KIRC	-0.0781424	3.53e-11	1.4e-05	X	37208607	PRRG1	1stExon-island
cg06408533	KIRC	0.181421	1.91e-36	7.55e-31	X	67867352	STARD8	TSS200-opensea
cg06455206	KIRC	0.0926406	1.3e-10	5.15e-05	X	49643431	USP27X	TSS1500-island
cg06482328	KIRC	0.0780519	5.27e-12	2.08e-06	X	119385834	ZBTB33	5'UTR-island
cg06513359	KIRC	0.0536299	5.18e-08	0.0204388	X	47004280	NDUFB11	Body-island
cg06521531	KIRC	-0.0693009	2.51e-09	0.000989188	X	135229551	FHL1	Body-island
cg06616857	KIRC	0.0558495	3.69e-10	0.000145753	X	153719132	SLC10A3	TSS200-island
cg06619487	KIRC	0.077262	7.73e-11	3.05e-05	X	23353027	PTCHD1	1stExon-island
cg06620254	KIRC	0.0738561	9.27e-10	0.000366033	X	70503046	NONO	5'UTR-shore
cg06647694	KIRC	0.177163	4.6e-10	0.000181489	X	131261885	FRMD7	5'UTR-opensea
cg06691299	KIRC	0.155004	1.3e-26	5.15e-21	X	47077361	CDK16	TSS1500-island
cg06742180	KIRC	0.136206	3.86e-12	1.52e-06	X	123039177	XIAP	Body-opensea
cg06746884	KIRC	0.0673743	2.38e-08	0.00939763	X	31285129	DMD	Body-shore
cg06782349	KIRC	0.113493	1.62e-08	0.00637836	X	33744708		IGR-island
cg06871279	KIRC	0.165638	7.51e-12	2.97e-06	X	105937121	RNF128	1stExon-opensea
cg06908232	KIRC	0.0826096	1.69e-12	6.66e-07	X	128977816	ZDHHC9	TSS1500-island
cg06915321	KIRC	0.178249	1.64e-10	6.48e-05	X	136648249	ZIC3	TSS200-island
cg06945800	KIRC	0.0590363	4.7e-09	0.00185548	X	118892610	ANKRD58	1stExon-island
cg06959635	KIRC	0.142581	5.73e-08	0.0226019	X	138724627	MCF2	1stExon-opensea
cg07051162	KIRC	-0.0993041	1.03e-13	4.08e-08	X	30671305	GK	TSS200-island
cg07069575	KIRC	0.146302	1.26e-14	4.97e-09	X	49688313	CLCN5	5'UTR-shore
cg07096248	KIRC	-0.0740336	8.63e-12	3.41e-06	X	16888596	RBBP7	TSS200-island
cg07099245	KIRC	-0.11719	1.11e-20	4.39e-15	X	39954231	BCOR	5'UTR-island
cg07136610	KIRC	-0.0747703	2.18e-09	0.000861768	X	53713793	HUWE1	TSS200-island
cg07137581	KIRC	0.107756	5.2e-15	2.05e-09	X	63425776	FAM123B	TSS200-island
cg07195469	KIRC	-0.122473	2.13e-10	8.41e-05	X	153637739	DNASE1L1	TSS200-shore
cg07283407	KIRC	-0.0827399	2.45e-09	0.000967037	X	133679994	MGC16121	Body-shore
cg07297906	KIRC	0.103803	3.52e-09	0.00138904	X	133119578	GPC3	5'UTR-island
cg07312966	KIRC	-0.0662726	5.4e-09	0.00213201	X	132549205	GPC4	TSS200-island
cg07368951	KIRC	-0.0744839	1.93e-10	7.63e-05	X	62570953	SPIN4	5'UTR-island
cg07381502	KIRC	-0.0759007	1.05e-10	4.16e-05	X	40440191	ATP6AP2	TSS200-island
cg07382899	KIRC	0.100083	8.29e-14	3.27e-08	X	128789004	APLN	TSS200-island
cg07419178	KIRC	0.0765649	4.1e-09	0.00161717	X	48916555	CCDC120	5'UTR-opensea
cg07446674	KIRC	0.0622156	1.41e-08	0.00557305	X	135333561	MAP7D3	1stExon-island
cg07629996	KIRC	0.16778	7.34e-24	2.9e-18	X	17673876	NHS	Body-island
cg07647518	KIRC	0.0559522	2.16e-08	0.0085126	X	19904979	SH3KBP1	Body-shore
cg07648454	KIRC	0.0625539	7.62e-09	0.00300752	X	124337761		IGR-island
cg07761358	KIRC	-0.17879	1.35e-15	5.34e-10	X	152991647	BCAP31	TSS1500-island
cg07771637	KIRC	-0.05514	1.48e-11	5.85e-06	X	134186198	FAM127B	5'UTR-island
cg07780887	KIRC	-0.0713046	1.17e-23	4.6e-18	X	73325165	NCRNA00182	Body-island
cg07798731	KIRC	-0.176489	8.86e-13	3.5e-07	10	85932296	C10orf99	TSS1500-opensea
cg07799491	KIRC	0.0536211	5.75e-09	0.00227163	X	149861526	MTMR1	TSS1500-opensea
cg07806343	KIRC	0.0588542	5.33e-08	0.0210421	X	129194523		IGR-island
cg07810164	KIRC	-0.0713892	3.78e-11	1.49e-05	X	13588174	EGFL6	Body-island
cg07834773	KIRC	0.0814618	4.47e-10	0.000176259	X	50214061	DGKK	TSS1500-shore
cg07867687	KIRC	0.0534038	1.14e-14	4.49e-09	X	48334539	FTSJ1	TSS200-island
cg07887243	KIRC	-0.103329	3.09e-11	1.22e-05	X	43741530	MAOB	1stExon-island
cg08087512	KIRC	0.0604972	1.91e-09	0.000755591	X	153990886	DKC1	TSS200-island
cg08209483	KIRC	0.0461472	1.14e-15	4.52e-10	X	118110092	LONRF3	Body-island
cg08222309	KIRC	0.10567	1.05e-20	4.15e-15	X	80457015	SH3BGRL	TSS1500-opensea
cg08239458	KIRC	0.109474	4.77e-23	1.88e-17	X	135579472	HTATSF1	TSS200-island
cg08298085	KIRC	0.0413192	8.79e-08	0.0346799	X	77166237	ATP7A	1stExon-island
cg08327960	KIRC	0.0676045	1.22e-09	0.000483066	X	38663047	MID1IP1	5'UTR-island
cg08358587	KIRC	-0.0461446	1.46e-08	0.00575336	X	100603709	TIMM8A	TSS200-island
cg08384999	KIRC	0.106881	5.4e-10	0.000213222	X	40004346	BCOR	5'UTR-island
cg08409482	KIRC	-0.148509	3.77e-15	1.49e-09	X	132551364		IGR-shore
cg08437461	KIRC	0.0737474	6.82e-10	0.000269185	X	102611373	WBP5	TSS200-opensea
cg08470157	KIRC	-0.0986702	3.17e-12	1.25e-06	X	30671302	GK	TSS200-island
cg08479532	KIRC	0.054874	5.35e-09	0.0021137	X	109560744	AMMECR1	Body-island
cg08560117	KIRC	0.0740741	5.61e-11	2.22e-05	X	153775841	IKBKG	1stExon-island
cg08586423	KIRC	0.136855	5.93e-18	2.34e-12	X	102508853	TCEAL8	Body-opensea
cg08656747	KIRC	0.0898418	9.95e-14	3.93e-08	X	47696169	ZNF81	TSS200-island
cg08675092	KIRC	0.0458505	6.12e-23	2.42e-17	6	32811181	PSMB8	Body-shore
cg08690835	KIRC	0.0986078	1.59e-11	6.26e-06	X	63424140	FAM123B	5'UTR-shore
cg08698436	KIRC	-0.117575	5.77e-11	2.28e-05	X	18908255	LOC100132163	TSS200-opensea
cg08704539	KIRC	0.132072	8.75e-11	3.45e-05	X	100546356	TAF7L	Body-island
cg08758558	KIRC	0.0747881	2.8e-11	1.11e-05	X	45046434	CXorf36	Body-opensea
cg08769559	KIRC	-0.0855507	1.51e-13	5.95e-08	X	25034121	ARX	TSS200-island
cg08783090	KIRC	0.130737	3.36e-08	0.0132646	X	151143125	GABRE	1stExon-island
cg08790343	KIRC	-0.0916049	4.63e-10	0.000182673	X	9754260	SHROOM2	TSS1500-island
cg08950703	KIRC	0.0863818	6.4e-09	0.00252556	X	84499023	ZNF711	1stExon-island
cg08991015	KIRC	0.0933376	3.73e-10	0.000147329	X	134049419	MOSPD1	TSS200-shore
cg09034929	KIRC	0.0503093	6.78e-11	2.68e-05	X	70288225	SNX12	1stExon-island
cg09039264	KIRC	-0.10773	8.21e-11	3.24e-05	X	39866079		IGR-island
cg09070199	KIRC	-0.0910293	2.08e-14	8.22e-09	X	62570990	SPIN4	5'UTR-island
cg09072865	KIRC	0.0640202	7.87e-09	0.00310788	X	106243506	MORC4	TSS200-island
cg09109599	KIRC	0.0638639	1.16e-07	0.0457993	X	68048454	EFNB1	TSS1500-shore
cg09159923	KIRC	-0.0786415	7.75e-13	3.06e-07	X	16730344	CTPS2	TSS200-island
cg09167861	KIRC	0.214977	5.64e-40	2.23e-34	X	135251741	FHL1	Body-opensea
cg09227616	KIRC	0.069049	3.52e-10	0.000139085	X	49056886	SYP	TSS1500-island
cg09229960	KIRC	0.0668065	7.1e-08	0.0280258	X	153607856	EMD	1stExon-island
cg09302010	KIRC	0.102684	1.72e-12	6.79e-07	X	57021502	SPIN3	5'UTR-shore
cg09310980	KIRC	0.0505308	4.53e-08	0.0178952	X	152740503		IGR-island
cg09515442	KIRC	-0.105175	5.22e-10	0.000206084	X	48689942	PCSK1N	Body-island
cg09524087	KIRC	-0.0804474	9.14e-12	3.61e-06	X	9433262	TBL1X	5'UTR-island
cg09625066	KIRC	0.0910631	2.74e-09	0.00108314	X	46937571	RGN	TSS1500-shore
cg09628099	KIRC	0.105256	1.76e-12	6.96e-07	X	47863193	ZNF182	5'UTR-shore
cg09720420	KIRC	0.0775193	1.71e-12	6.76e-07	X	142722174	SLITRK4	5'UTR-island
cg09768654	KIRC	0.129444	3.85e-11	1.52e-05	X	153046386	SRPK3	TSS200-island
cg09790289	KIRC	0.0616653	1.28e-11	5.04e-06	X	77359560	PGK1	TSS200-island
cg09810925	KIRC	-0.0603406	3.09e-08	0.0121893	X	40035331	BCOR	5'UTR-island
cg09850561	KIRC	0.0703797	3.43e-18	1.36e-12	X	38420581	TSPAN7	TSS200-island
cg09923855	KIRC	0.0817762	8.32e-12	3.28e-06	X	135579466	HTATSF1	1stExon-island
cg09935073	KIRC	0.13523	3.49e-10	0.000137893	X	110187555	PAK3	5'UTR-opensea
cg09966745	KIRC	0.0853673	3.79e-10	0.00014971	X	71934213	PHKA1	TSS200-island
cg09985072	KIRC	0.0599459	1.07e-08	0.00422365	X	48814942	OTUD5	5'UTR-island
cg10060499	KIRC	0.184005	2.73e-11	1.08e-05	X	39378734		IGR-opensea
cg10061736	KIRC	0.0522311	1.6e-10	6.3e-05	X	133756545	PLAC1	5'UTR-opensea
cg10082114	KIRC	0.0887738	9.39e-09	0.00370814	X	77041194	ATRX	Body-island
cg10088372	KIRC	0.0496072	5.34e-09	0.0021084	X	133507354	PHF6	1stExon-island
cg10163050	KIRC	-0.15371	1.35e-16	5.35e-11	X	153637650	DNASE1L1	TSS200-shelf
cg10207070	KIRC	0.0602541	3.62e-14	1.43e-08	X	47005131	RBM10	5'UTR-shore
cg10246296	KIRC	-0.0800321	6.19e-10	0.000244265	X	10124977	CLCN4	TSS200-shore
cg10288106	KIRC	-0.0562408	3.57e-12	1.41e-06	X	71526903	CITED1	TSS1500-island
cg10308137	KIRC	-0.0412461	5.26e-11	2.08e-05	X	23801074	SAT1	TSS200-island
cg10430126	KIRC	-0.0842468	3.46e-09	0.00136563	X	13707068	RAB9A	TSS1500-island
cg10443532	KIRC	0.140495	3.5e-08	0.0138098	X	136657084		IGR-island
cg10451760	KIRC	0.154076	2.57e-14	1.02e-08	X	136649093	ZIC3	1stExon-island
cg10482495	KIRC	0.104102	2.04e-08	0.00806819	X	71351314	NHSL2	Body-island
cg10530171	KIRC	-0.129887	7.61e-20	3.01e-14	X	99892067	TSPAN6	TSS1500-shore
cg10723245	KIRC	0.0798234	1.8e-12	7.09e-07	X	103401991	MCART6	TSS1500-shore
cg10801213	KIRC	0.102829	6.13e-09	0.00241803	X	70150722	SLC7A3	5'UTR-island
cg10860619	KIRC	0.0618679	1.82e-10	7.2e-05	X	46771853	PHF16	5'UTR-island
cg10867226	KIRC	-0.0354947	1.68e-12	6.61e-07	X	67352731	OPHN1	Body-island
cg10978884	KIRC	-0.0654903	3.41e-08	0.0134523	X	109561384	AMMECR1	5'UTR-island
cg10991108	KIRC	0.056415	1.4e-08	0.00551297	X	48958414	WDR45	TSS1500-island
cg10995081	KIRC	-0.0956973	2.08e-17	8.22e-12	X	48858587	GRIPAP1	Body-opensea
cg11049634	KIRC	-0.055538	9.39e-08	0.0370821	X	40016121	BCOR	5'UTR-island
cg11116781	KIRC	-0.0801502	3.06e-13	1.21e-07	X	123094384	STAG2	TSS1500-island
cg11253356	KIRC	0.066342	5.85e-08	0.0231024	X	103810926	IL1RAPL2	TSS200-shore
cg11291200	KIRC	-0.0748667	9.73e-08	0.0383991	X	30233490	MAGEB2	TSS200-opensea
cg11320810	KIRC	0.0662809	3.23e-08	0.0127348	X	117861215	IL13RA1	TSS1500-island
cg11337025	KIRC	0.0617617	2.29e-10	9.03e-05	X	106361672	RBM41	Body-island
cg11395955	KIRC	-0.0661591	1.39e-13	5.47e-08	X	23801087	SAT1	TSS200-island
cg11482392	KIRC	0.075981	1.43e-08	0.00563278	X	96854396	DIAPH2	3'UTR-opensea
cg11550332	KIRC	0.0617438	1.15e-07	0.0455136	X	106960273	TSC22D3	Body-shore
cg11616438	KIRC	-0.0662905	4.9e-10	0.00019324	X	30671316	GK	TSS200-island
cg11618093	KIRC	0.0995988	8.5e-12	3.36e-06	X	152000347	NSDHL	5'UTR-shore
cg11650039	KIRC	-0.0412338	9.74e-10	0.000384658	X	15525325	BMX	5'UTR-opensea
cg11779941	KIRC	-0.15377	3.82e-14	1.51e-08	X	153606335	EMD	TSS1500-island
cg11839979	KIRC	-0.0508378	6.25e-08	0.0246693	X	109246372	TMEM164	1stExon-island
cg11902811	KIRC	0.0741737	5.53e-12	2.18e-06	X	129473879	SLC25A14	TSS200-island
cg12050949	KIRC	0.0457477	6.9e-09	0.0027256	X	117246275	KLHL13	5'UTR-shelf
cg12071142	KIRC	-0.0794405	9.93e-08	0.0391846	X	10588311	MID1	5'UTR-island
cg12074916	KIRC	0.0557094	8.19e-08	0.032319	X	47863588	SPACA5	TSS200-island
cg12125741	KIRC	0.079442	6.88e-11	2.72e-05	X	103401380	MCART6	5'UTR-shore
cg12263679	KIRC	-0.0417183	3.14e-09	0.00123797	X	133941121	FAM122C	TSS200-opensea
cg12291192	KIRC	0.0774628	2.47e-12	9.77e-07	X	48397840	TBC1D25	TSS1500-island
cg12313310	KIRC	-0.0621989	7.01e-12	2.77e-06	X	114524266	LUZP4	TSS200-opensea
cg12485020	KIRC	-0.0707973	2.23e-08	0.00881365	X	110039269	CHRDL1	5'UTR-island
cg12543132	KIRC	0.080889	1.99e-20	7.84e-15	X	23761732	ACOT9	TSS1500-shore
cg12614178	KIRC	0.0839849	5.36e-14	2.11e-08	X	41782685	CASK	TSS1500-island
cg12614984	KIRC	-0.125106	1.74e-09	0.000686373	X	9753567	SHROOM2	TSS1500-island
cg12647861	KIRC	-0.149286	6.74e-09	0.00266203	X	103268125	MIR1256	Body-island
cg12720637	KIRC	0.204951	2.89e-13	1.14e-07	X	151619769	GABRA3	1stExon-opensea
cg12753358	KIRC	0.0948267	1.94e-15	7.68e-10	X	68047716	EFNB1	TSS1500-shore
cg12858650	KIRC	0.0360118	6.92e-10	0.000273092	X	47039497	RBM10	Body-island
cg12865398	KIRC	0.0658956	7.14e-08	0.0281747	X	49056670	SYP	TSS200-island
cg13024624	KIRC	0.0667611	5.59e-10	0.000220602	X	100663146	HNRNPH2	TSS200-island
cg13069450	KIRC	0.0639357	1.07e-12	4.22e-07	X	119077366	NKAP	1stExon-island
cg13114305	KIRC	0.176582	8.7e-11	3.44e-05	X	100446736		IGR-island
cg13178332	KIRC	0.0155967	8.43e-14	3.33e-08	X	41112819		IGR-island
cg13185972	KIRC	-0.267828	5.91e-25	2.33e-19	X	9908641	SHROOM2	Body-shelf
cg13195284	KIRC	-0.0840719	4.29e-08	0.016921	X	73512512	NCRNA00182	Body-island
cg13203541	KIRC	0.0568178	2.1e-08	0.00828369	X	77359450	PGK1	TSS1500-island
cg13208429	KIRC	-0.0999753	7.46e-13	2.94e-07	X	109561508	AMMECR1	5'UTR-island
cg13225368	KIRC	-0.0426958	1.45e-10	5.71e-05	X	9433099	TBL1X	TSS200-island
cg13234544	KIRC	-0.155377	8.25e-11	3.26e-05	7	76911877	CCDC146	Body-opensea
cg13240932	KIRC	0.0683015	1.08e-09	0.000425543	X	153665624	GDI1	1stExon-island
cg13244998	KIRC	0.0664905	2.32e-08	0.00914815	X	129114666		IGR-island
cg13328614	KIRC	-0.145319	7.18e-09	0.00283528	X	48775123	PIM2	Body-shore
cg13350478	KIRC	0.13227	1.98e-09	0.000782473	X	20286613		IGR-island
cg13365334	KIRC	-0.196972	3.69e-21	1.46e-15	X	153598742	FLNA	Body-shore
cg13370916	KIRC	0.146321	7.05e-25	2.78e-19	X	67867403	STARD8	TSS200-opensea
cg13423140	KIRC	-0.119445	2.66e-09	0.0010511	X	153167905	AVPR2	TSS200-opensea
cg13510054	KIRC	0.096773	3.06e-09	0.00120981	X	99664525	PCDH19	1stExon-island
cg13516940	KIRC	0.0641564	2.23e-10	8.8e-05	X	69654033		IGR-island
cg13574945	KIRC	0.0534815	1.67e-08	0.00658409	X	48814580	OTUD5	5'UTR-island
cg13606829	KIRC	0.0601772	3.15e-09	0.001242	X	150565921	VMA21	Body-shore
cg13616735	KIRC	0.136851	1.32e-09	0.000520737	X	21392334	CNKSR2	TSS1500-island
cg13645300	KIRC	0.0671188	4.68e-08	0.0184646	X	49027939	PLP2	TSS1500-shore
cg13649400	KIRC	0.051196	2.5e-08	0.00988428	X	54209968	FAM120C	TSS1500-shore
cg13677598	KIRC	0.127492	1.64e-21	6.47e-16	X	69672096	DLG3	TSS200-shelf
cg13699152	KIRC	-0.116159	3.12e-15	1.23e-09	X	30671314	GK	TSS200-island
cg13728104	KIRC	-0.0760406	9.06e-08	0.0357581	X	9433105	TBL1X	TSS200-island
cg13747960	KIRC	-0.107038	8.61e-17	3.4e-11	X	152989585	BCAP31	Body-island
cg13775533	KIRC	0.197572	1.64e-19	6.48e-14	X	99663073	PCDH19	1stExon-island
cg13784767	KIRC	-0.0633771	7.54e-14	2.98e-08	X	16730515	CTPS2	TSS200-island
cg13786096	KIRC	-0.0459624	2.67e-08	0.010532	X	119384537	ZBTB33	TSS200-island
cg13807550	KIRC	0.0483016	8.37e-10	0.000330306	X	54838543	MAGED2	Body-shelf
cg13943560	KIRC	0.0919471	1.42e-09	0.000558826	X	40004481	BCOR	5'UTR-island
cg13953735	KIRC	0.0677277	1.07e-07	0.0422275	19	48229268	EHD2	Body-island
cg13984511	KIRC	0.0683696	3.16e-08	0.0124853	X	23760918	ACOT9	Body-shore
cg14006678	KIRC	0.0945383	1.57e-14	6.19e-09	X	48814864	OTUD5	5'UTR-island
cg14013497	KIRC	-0.135428	7.49e-10	0.000295484	X	153770094	IKBKG	TSS1500-opensea
cg14022645	KIRC	-0.0743946	1.63e-12	6.44e-07	X	48901405	TFE3	TSS1500-island
cg14057181	KIRC	-0.0977927	1.88e-12	7.41e-07	X	105855056	CXorf57	TSS200-island
cg14073590	KIRC	-0.101616	1.07e-12	4.24e-07	X	71526883	CITED1	TSS1500-island
cg14106263	KIRC	0.0884683	3.95e-10	0.000155734	X	129535683	RBMX2	TSS1500-shore
cg14191108	KIRC	0.0661181	2.39e-10	9.45e-05	X	43515457	MAOA	1stExon-island
cg14243895	KIRC	0.137116	9.81e-08	0.0387177	X	125300078	DCAF12L2	TSS200-island
cg14258356	KIRC	0.0554531	1.21e-07	0.0478092	X	47510110	ELK1	TSS200-island
cg14260465	KIRC	-0.0799405	7.76e-09	0.00306493	X	114524264	LUZP4	TSS200-opensea
cg14269301	KIRC	0.181914	2.22e-11	8.78e-06	X	19532166	MAP3K15	Body-shore
cg14314132	KIRC	0.107021	4.26e-11	1.68e-05	X	118986954	UPF3B	1stExon-island
cg14314451	KIRC	0.0773892	4.67e-10	0.00018454	X	62780853	LOC92249	Body-opensea
cg14322166	KIRC	0.107424	1.02e-17	4.04e-12	X	70364735	NLGN3	1stExon-opensea
cg14533874	KIRC	0.05842	8.47e-08	0.0334468	X	54071285	PHF8	TSS1500-island
cg14621531	KIRC	-0.0769047	4.05e-09	0.00159755	X	13707062	RAB9A	TSS1500-island
cg14653284	KIRC	-0.104455	1.17e-08	0.00462713	2	11679879	GREB1	5'UTR-opensea
cg14725109	KIRC	0.0793698	4.02e-21	1.59e-15	X	47696106	ZNF81	TSS200-island
cg14766682	KIRC	0.126527	3e-15	1.18e-09	X	48916658	CCDC120	5'UTR-opensea
cg14783837	KIRC	-0.096584	1.33e-17	5.26e-12	X	153060166	IDH3G	TSS200-island
cg14814815	KIRC	0.060936	1.9e-13	7.5e-08	X	16731867	CTPS2	TSS1500-shore
cg14873818	KIRC	0.0950237	1.12e-12	4.4e-07	X	83757652	HDX	TSS200-opensea
cg14923379	KIRC	0.0491704	4.79e-08	0.0188937	X	63420891	FAM123B	5'UTR-shelf
cg15041487	KIRC	0.0666977	6.18e-09	0.00243896	X	48958242	WDR45	TSS200-island
cg15067665	KIRC	0.11633	5.57e-12	2.2e-06	X	153166644	AVPR2	TSS1500-opensea
cg15133344	KIRC	-0.109967	3.6e-18	1.42e-12	X	40034881	BCOR	5'UTR-island
cg15144825	KIRC	0.0662791	8.07e-08	0.031848	X	134186281	FAM127B	TSS200-island
cg15198729	KIRC	0.116128	4.46e-08	0.0175921	X	100446496		IGR-island
cg15289846	KIRC	-0.070101	1.61e-09	0.000633692	X	16888880	RBBP7	TSS1500-island
cg15383797	KIRC	0.0769192	1.28e-10	5.05e-05	X	49965284	AKAP4	TSS1500-opensea
cg15418221	KIRC	0.0720538	1.97e-10	7.78e-05	X	77359544	PGK1	TSS200-island
cg15443127	KIRC	0.0482006	5.46e-09	0.00215453	X	69501934	RAB41	TSS200-opensea
cg15465642	KIRC	0.124978	2.36e-23	9.32e-18	X	153218916	HCFC1	Body-island
cg15529344	KIRC	0.129343	2.13e-17	8.41e-12	X	118891924	ANKRD58	TSS1500-island
cg15534364	KIRC	-0.0625402	2.52e-08	0.00995306	X	71527089	CITED1	TSS1500-island
cg15570803	KIRC	0.0763492	2.2e-17	8.7e-12	X	70288412	SNX12	TSS200-shore
cg15672146	KIRC	-0.0718996	1.18e-14	4.64e-09	X	112084792	AMOT	TSS1500-island
cg15806723	KIRC	0.0499478	3.39e-08	0.0133848	X	49056711	SYP	TSS200-island
cg15816181	KIRC	0.115854	7.9e-10	0.000312049	X	82763261	POU3F4	TSS200-shore
cg15844109	KIRC	0.174374	4.15e-15	1.64e-09	X	78003205	LPAR4	1stExon-opensea
cg15844471	KIRC	0.146556	7.95e-16	3.14e-10	X	133371988	CCDC160	5'UTR-shore
cg15919369	KIRC	-0.0456805	4.62e-11	1.83e-05	X	77151050	MAGT1	1stExon-island
cg16068020	KIRC	0.0963912	3.35e-09	0.0013237	X	101770958	TMSB15A	5'UTR-shore
cg16084857	KIRC	0.191782	2.5e-12	9.88e-07	X	130216575	FLJ30058	Body-island
cg16097380	KIRC	0.0476084	1.08e-07	0.0428012	X	118603239	LOC100303728	TSS200-island
cg16108684	KIRC	0.132385	3.8e-08	0.0149985	X	125300035	DCAF12L2	TSS200-island
cg16167673	KIRC	0.21244	1.79e-46	7.07e-41	X	67867262	STARD8	TSS1500-opensea
cg16200513	KIRC	-0.0954454	1.1e-10	4.33e-05	X	110925018	ALG13	Body-island
cg16218862	KIRC	-0.0807437	3.06e-14	1.21e-08	X	47382939		IGR-island
cg16221895	KIRC	0.0814404	2.3e-11	9.07e-06	X	68835891	EDA	TSS200-island
cg16244634	KIRC	0.13726	1.34e-14	5.28e-09	X	129113524		IGR-shore
cg16257494	KIRC	-0.0530918	9.47e-09	0.00373908	X	12993211	TMSB4X	TSS200-island
cg16314146	KIRC	0.110696	2.76e-17	1.09e-11	X	135579481	HTATSF1	TSS200-island
cg16359563	KIRC	0.0920874	3.77e-14	1.49e-08	X	64196429	ZC4H2	TSS200-opensea
cg16403901	KIRC	0.0573647	1.03e-11	4.07e-06	X	49126486	PPP1R3F	1stExon-island
cg16405946	KIRC	-0.189833	6.61e-23	2.61e-17	X	153640960	DNASE1L1	TSS1500-shore
cg16409172	KIRC	0.107648	5.75e-16	2.27e-10	X	20008364	LOC729609	TSS1500-shore
cg16481170	KIRC	0.106378	2.93e-11	1.16e-05	X	74145312	KIAA2022	TSS200-shore
cg16529483	KIRC	0.0782088	4.31e-08	0.0170191	X	153046451	SRPK3	TSS200-island
cg16620229	KIRC	-0.17474	4.8e-09	0.00189628	X	129307331	RAB33A	Body-shore
cg16653057	KIRC	0.143501	9.18e-09	0.00362264	X	74144727	KIAA2022	5'UTR-island
cg16697940	KIRC	-0.0798018	5.78e-10	0.00022831	X	140271321	LDOC1	TSS200-island
cg16730652	KIRC	0.204011	1.41e-17	5.58e-12	X	65384051	HEPH	TSS200-opensea
cg16734817	KIRC	0.0518042	1.68e-08	0.00664202	X	49687071	CLCN5	TSS200-island
cg16735667	KIRC	-0.106536	1.79e-08	0.00707013	X	66788193	AR	TSS1500-opensea
cg16809091	KIRC	-0.0683551	4.49e-11	1.77e-05	X	70752808	OGT	TSS200-island
cg16832275	KIRC	0.0752122	1.91e-10	7.54e-05	X	55744084	RRAGB	TSS200-opensea
cg16976875	KIRC	0.0544864	1.52e-08	0.00598477	X	38663177	MID1IP1	5'UTR-island
cg16978043	KIRC	-0.0878818	3.59e-13	1.42e-07	X	16888606	RBBP7	TSS200-island
cg17008556	KIRC	0.0877115	1.88e-11	7.43e-06	X	48901167	TFE3	TSS200-island
cg17074762	KIRC	-0.126725	1.18e-17	4.64e-12	X	68052208	EFNB1	Body-shore
cg17077516	KIRC	-0.0536656	7.89e-08	0.031145	X	16964700	REPS2	TSS200-island
cg17122979	KIRC	0.0557017	2.63e-08	0.0103694	X	48397915	TBC1D25	TSS200-island
cg17220866	KIRC	0.0835238	2.49e-13	9.81e-08	X	37706296	DYNLT3	Body-island
cg17239904	KIRC	-0.0816389	3.99e-12	1.57e-06	X	39872979		IGR-island
cg17296858	KIRC	-0.0249056	1.48e-09	0.000582983	X	40482886		IGR-island
cg17299883	KIRC	-0.074196	4.03e-09	0.00159267	X	64754624	LAS1L	5'UTR-island
cg17363084	KIRC	0.0435525	7.62e-09	0.003008	X	118603274	LOC100303728	TSS200-island
cg17398485	KIRC	0.0709544	8.75e-08	0.0345348	X	118699448	CXorf56	TSS200-opensea
cg17399684	KIRC	0.0546919	7.48e-10	0.000295297	X	47510170	ELK1	TSS200-island
cg17460003	KIRC	0.170417	4.25e-19	1.68e-13	X	68834205		IGR-shore
cg17464366	KIRC	0.0822703	7.12e-08	0.028124	X	64196495	ZC4H2	TSS200-opensea
cg17472432	KIRC	0.130256	4.61e-34	1.82e-28	X	67867429	STARD8	TSS200-opensea
cg17488844	KIRC	-0.0692956	4.54e-13	1.79e-07	X	102883840	TCEAL1	TSS200-shore
cg17720011	KIRC	0.0480996	2.03e-10	8e-05	X	134049345	MOSPD1	TSS200-shore
cg17775340	KIRC	0.0774915	3.62e-10	0.000142767	X	31284448	DMD	Body-shore
cg17814335	KIRC	0.132338	1.12e-07	0.044038	X	74143945	KIAA2022	5'UTR-island
cg17868752	KIRC	-0.0541793	1.33e-09	0.000526314	X	71527142	CITED1	TSS1500-island
cg17880859	KIRC	-0.0414842	1e-07	0.0394777	X	16888414	RBBP7	1stExon-island
cg17959735	KIRC	-0.0669302	1.82e-09	0.000719205	X	109561515	AMMECR1	5'UTR-island
cg17959821	KIRC	0.108361	3.77e-08	0.0148716	X	53311012	IQSEC2	Body-opensea
cg18099006	KIRC	0.0705221	1.98e-08	0.00783099	X	38662943	MID1IP1	5'UTR-island
cg18132745	KIRC	0.0509759	8.12e-09	0.0032044	X	14891338	MOSPD2	TSS1500-island
cg18156601	KIRC	0.0676779	4.33e-11	1.71e-05	X	66766050	AR	1stExon-island
cg18164076	KIRC	-0.0725026	3.89e-08	0.0153389	X	153059963	IDH3G	5'UTR-island
cg18225658	KIRC	-0.149007	2.73e-14	1.08e-08	X	153084485	PDZD4	Body-island
cg18239702	KIRC	-0.0749472	8.51e-09	0.0033603	X	17393016	NHS	TSS1500-shore
cg18386008	KIRC	0.0521153	2.11e-08	0.00833744	X	100353031		IGR-island
cg18389752	KIRC	-0.0774892	5.58e-16	2.2e-10	X	112084448	AMOT	TSS1500-island
cg18463605	KIRC	-0.180402	1.25e-18	4.94e-13	X	16607638	CTPS2	3'UTR-opensea
cg18480706	KIRC	0.0979012	1.24e-12	4.88e-07	X	74742458	ZDHHC15	Body-shore
cg18515545	KIRC	0.0763909	2e-08	0.00791149	X	15288312	ASB9	TSS200-opensea
cg18516687	KIRC	0.0951097	4.01e-17	1.58e-11	X	154254859	FUNDC2	TSS1500-shore
cg18542573	KIRC	-0.0946566	1.5e-11	5.94e-06	X	71526995	CITED1	TSS1500-island
cg18689730	KIRC	0.0502267	1.6e-11	6.33e-06	X	118370302	PGRMC1	1stExon-island
cg18748527	KIRC	-0.0625328	3.2e-08	0.0126295	X	40036021	BCOR	5'UTR-shore
cg18780401	KIRC	0.0547054	1.46e-11	5.77e-06	X	48815125	OTUD5	TSS1500-island
cg18785414	KIRC	-0.194722	2.02e-10	7.96e-05	X	117631015	DOCK11	Body-shore
cg18813387	KIRC	-0.108582	2.84e-16	1.12e-10	X	99892062	TSPAN6	TSS1500-shore
cg18827179	KIRC	0.0528287	9.62e-08	0.0379793	X	153640466	TAZ	Body-island
cg18833705	KIRC	0.0741988	9.51e-14	3.75e-08	X	134232988	NCRNA00087	TSS1500-island
cg18923230	KIRC	0.0544732	5.95e-08	0.0234958	X	153626413	RPL10	TSS200-island
cg18963065	KIRC	-0.0576704	1.83e-13	7.22e-08	X	15525321	BMX	5'UTR-opensea
cg18989810	KIRC	0.0563492	3.86e-08	0.0152569	X	152907969	DUSP9	1stExon-island
cg19038081	KIRC	-0.0416929	1.38e-08	0.00545674	X	30907518	MAP3K7IP3	TSS200-island
cg19168249	KIRC	0.0952909	1.32e-15	5.22e-10	X	153657001	ATP6AP1	5'UTR-island
cg19235109	KIRC	0.0735837	4.64e-10	0.000182976	X	14891591	FANCB	TSS1500-island
cg19261513	KIRC	0.130916	5.6e-10	0.000221235	X	47057322	UBA1	5'UTR-shelf
cg19386336	KIRC	0.171429	5.24e-09	0.00206812	X	100546064	TAF7L	Body-island
cg19392138	KIRC	0.0601055	9.09e-09	0.00358762	X	134479169	ZNF75D	TSS1500-shore
cg19421044	KIRC	0.0688975	2.19e-10	8.63e-05	X	153640306	DNASE1L1	1stExon-island
cg19439810	KIRC	0.176049	5.39e-08	0.0212893	1	46768592	LRRC41	Body-island
cg19471462	KIRC	-0.140884	2.57e-32	1.02e-26	X	39871053		IGR-shore
cg19541913	KIRC	0.0848288	2.61e-11	1.03e-05	X	103401494	MCART6	5'UTR-island
cg19548593	KIRC	0.0734506	3.02e-10	0.000119282	X	154444605	VBP1	TSS200-opensea
cg19572135	KIRC	0.0508732	2.14e-09	0.000845108	X	23925992	APOO	1stExon-island
cg19605909	KIRC	-0.088156	2.62e-18	1.03e-12	X	67718729	YIPF6	TSS200-island
cg19631766	KIRC	-0.101809	8.51e-16	3.36e-10	X	128674232	OCRL	TSS200-island
cg19692710	KIRC	-0.123657	4.41e-08	0.0174244	11	73661920	DNAJB13	1stExon-opensea
cg19721057	KIRC	-0.105153	3.72e-08	0.0146953	X	66788395	AR	TSS1500-opensea
cg19821612	KIRC	0.0927798	1.69e-09	0.000666481	X	152224619	PNMA3	TSS200-island
cg19822434	KIRC	0.119771	6.91e-29	2.73e-23	X	118744347		IGR-shelf
cg19834421	KIRC	0.0669294	6.65e-14	2.63e-08	X	70288180	SNX12	1stExon-island
cg19840133	KIRC	-0.0680038	6.56e-09	0.00258872	X	48754590	TIMM17B	Body-island
cg19855812	KIRC	-0.0691161	1.26e-13	4.99e-08	X	74376046	ABCB7	1stExon-opensea
cg19895492	KIRC	-0.0353264	2.75e-08	0.0108682	X	13752687	TRAPPC2	5'UTR-island
cg19900558	KIRC	-0.177797	1.2e-12	4.74e-07	X	152991641	BCAP31	TSS1500-island
cg19937286	KIRC	-0.0635114	5.47e-08	0.0215758	X	40017092	BCOR	5'UTR-shore
cg19937618	KIRC	0.0767859	8.79e-13	3.47e-07	X	48901183	TFE3	TSS200-island
cg19955701	KIRC	0.0567379	4.82e-08	0.0190452	X	16805691	CXorf15	Body-shore
cg19963797	KIRC	-0.0786702	6.25e-08	0.0246831	X	110924467	ALG13	TSS1500-island
cg20057595	KIRC	0.0793548	6.83e-10	0.000269618	X	30907727	MAP3K7IP3	TSS1500-island
cg20071670	KIRC	-0.136412	1.63e-08	0.00643143	11	73661895	DNAJB13	1stExon-opensea
cg20074774	KIRC	0.0604807	6.11e-10	0.000241102	X	38420780	TSPAN7	1stExon-island
cg20086420	KIRC	0.1092	5.33e-20	2.1e-14	X	48620337	GLOD5	Body-opensea
cg20116159	KIRC	0.104225	1.37e-09	0.000539271	X	17674384	NHS	Body-island
cg20279598	KIRC	-0.0913084	5.7e-10	0.000225005	X	153096506	PDZD4	TSS1500-shore
cg20321768	KIRC	0.0817911	6.84e-09	0.00269842	X	147581936	AFF2	TSS1500-island
cg20329959	KIRC	-0.113666	2.51e-12	9.92e-07	X	153637607	DNASE1L1	TSS200-shelf
cg20347665	KIRC	-0.0586889	4.24e-10	0.000167252	X	71351980	NHSL2	Body-island
cg20445038	KIRC	0.0480736	7.49e-09	0.00295644	X	150565466	VMA21	TSS200-island
cg20451131	KIRC	0.0977747	1.21e-08	0.00478229	X	17673726	NHS	Body-island
cg20455959	KIRC	0.0655738	9.72e-08	0.0383703	X	149861947	MTMR1	1stExon-opensea
cg20462493	KIRC	-0.214803	1.26e-14	4.96e-09	5	157340439		IGR-opensea
cg20484507	KIRC	0.12366	1.05e-08	0.00415729	X	21392617	CNKSR2	1stExon-island
cg20514061	KIRC	0.0555924	2.96e-08	0.0117013	X	107069338	MID2	1stExon-island
cg20522409	KIRC	0.118105	1.15e-07	0.0455192	X	109661602	AMMECR1	5'UTR-opensea
cg20660212	KIRC	-0.0956289	9.26e-15	3.66e-09	X	15511430	PIR	1stExon-island
cg20746035	KIRC	0.0587033	3.8e-09	0.00149861	X	49042873	PRICKLE3	TSS200-island
cg20763943	KIRC	-0.062269	1.09e-07	0.0430586	X	124336888		IGR-island
cg20780998	KIRC	-0.17514	1.14e-09	0.000450302	X	12996931		IGR-shelf
cg20818151	KIRC	0.0744979	2.21e-08	0.00870572	X	57618059	ZXDB	TSS1500-shore
cg20855303	KIRC	-0.0902574	7.75e-08	0.0306056	X	16965405	REPS2	Body-island
cg20971536	KIRC	0.0526366	4.69e-08	0.0185206	X	48535266		IGR-shore
cg20972834	KIRC	0.0642252	5.61e-08	0.0221409	X	74375795	ABCB7	Body-opensea
cg21010298	KIRC	-0.102833	1.45e-14	5.74e-09	X	40007065	BCOR	5'UTR-island
cg21040109	KIRC	-0.0990478	6.52e-10	0.000257302	X	139014368		IGR-island
cg21114303	KIRC	0.122403	1.08e-20	4.24e-15	X	54069147	PHF8	Body-shore
cg21127593	KIRC	0.0623154	1.37e-08	0.00541159	X	133507742	PHF6	5'UTR-shore
cg21153181	KIRC	-0.203318	3.93e-14	1.55e-08	X	153637497	DNASE1L1	5'UTR-shelf
cg21162029	KIRC	0.0899868	3.23e-14	1.28e-08	X	133306253		IGR-island
cg21201934	KIRC	0.0883665	9.6e-14	3.79e-08	X	70474169	ZMYM3	5'UTR-island
cg21205654	KIRC	0.0523305	7.57e-11	2.99e-05	X	118110766	LONRF3	Body-shore
cg21290775	KIRC	-0.0766995	6.3e-10	0.000248599	X	54466879	TSR2	1stExon-opensea
cg21323637	KIRC	-0.126205	1.59e-15	6.27e-10	X	153600494	FLNA	5'UTR-island
cg21327581	KIRC	0.0572845	5.72e-09	0.00225955	X	47479500	SYN1	TSS1500-island
cg21341170	KIRC	0.0668327	7.86e-08	0.0310466	X	34675348	TMEM47	5'UTR-island
cg21378039	KIRC	0.0728669	5.78e-08	0.0228285	X	146994369	ASFMR1	Body-shore
cg21411942	KIRC	-0.0621108	7.75e-10	0.000306012	X	100603678	TIMM8A	1stExon-island
cg21456313	KIRC	0.0864381	5.37e-08	0.0212141	X	107019610	TSC22D3	TSS1500-island
cg21459545	KIRC	-0.150665	1.94e-15	7.67e-10	X	153637814	DNASE1L1	5'UTR-shore
cg21471515	KIRC	-0.0805063	6.28e-10	0.000247963	X	131623259	MBNL3	5'UTR-island
cg21576698	KIRC	0.194114	7.6e-09	0.00299959	1	46767971	LRRC41	Body-island
cg21593552	KIRC	0.0910175	6.23e-23	2.46e-17	X	135579428	HTATSF1	1stExon-island
cg21597797	KIRC	-0.102544	1.88e-11	7.43e-06	X	109561513	AMMECR1	5'UTR-island
cg21860846	KIRC	0.0450857	1.04e-07	0.040981	X	47510507	ELK1	TSS1500-island
cg22012543	KIRC	0.0807746	2.51e-08	0.00990046	X	124339995		IGR-shore
cg22044068	KIRC	-0.0484813	1.26e-07	0.0496858	X	16730503	CTPS2	TSS200-island
cg22069441	KIRC	-0.0645132	6.79e-10	0.000268078	X	47004150	NDUFB11	Body-island
cg22223709	KIRC	-0.0753673	7.1e-14	2.8e-08	X	42637305	PPP1R2P9	Body-island
cg22238863	KIRC	0.0583668	3.62e-11	1.43e-05	X	47342101	ZNF41	5'UTR-island
cg22252245	KIRC	0.0718561	3.42e-08	0.0135117	X	41781891	CASK	Body-shore
cg22262233	KIRC	-0.124789	4.24e-10	0.000167251	15	27736070	GABRG3	Body-opensea
cg22275278	KIRC	0.0443711	5.33e-08	0.0210575	X	153607462	EMD	TSS200-island
cg22332233	KIRC	0.266305	1.25e-71	4.93e-66	X	48897515	TFE3	Body-shelf
cg22364374	KIRC	-0.0814775	6.12e-08	0.0241504	X	71526984	CITED1	TSS1500-island
cg22502059	KIRC	-0.0898791	7.49e-11	2.96e-05	X	149736852	MTM1	TSS200-island
cg22522913	KIRC	0.101174	1.81e-16	7.14e-11	X	46696086	RP2	TSS1500-shore
cg22526309	KIRC	0.0733354	6.22e-10	0.000245711	X	19003316	PHKA2	TSS1500-shore
cg22562219	KIRC	-0.0849704	2.82e-11	1.11e-05	X	153637700	DNASE1L1	TSS200-shelf
cg22655232	KIRC	-0.0599142	4.06e-09	0.00160318	X	42637497	PPP1R2P9	TSS200-shore
cg22655251	KIRC	0.102466	5.58e-08	0.0220153	X	49043166	PRICKLE3	TSS1500-shore
cg22656275	KIRC	-0.0964552	7.23e-14	2.85e-08	X	48685303		IGR-island
cg22666517	KIRC	-0.109526	1.34e-09	0.000527266	X	9916563	SHROOM2	3'UTR-shelf
cg22713892	KIRC	0.0670523	1.73e-09	0.000681585	X	47342160	ZNF41	5'UTR-island
cg22771999	KIRC	0.0792042	2.14e-09	0.000844572	X	64888437	MSN	Body-shore
cg22822140	KIRC	0.1461	4.55e-12	1.8e-06	X	153046577	SRPK3	1stExon-island
cg22839093	KIRC	0.0387619	2.42e-08	0.00955577	8	144668199	EEF1D	Body-opensea
cg22934939	KIRC	0.194752	1.45e-10	5.72e-05	X	136648313	ZIC3	TSS200-island
cg22952459	KIRC	-0.129046	4.84e-09	0.00191085	10	85932784	C10orf99	TSS1500-opensea
cg22959512	KIRC	0.0920053	1.04e-07	0.0410407	X	53251773	KDM5C	Body-shelf
cg22970017	KIRC	0.0854948	7.21e-09	0.00284474	X	140270501	LDOC1	1stExon-shore
cg23161024	KIRC	-0.0518126	1.54e-11	6.07e-06	X	9433097	TBL1X	TSS200-island
cg23169382	KIRC	0.122753	2.59e-17	1.02e-11	X	64254240		IGR-shore
cg23184276	KIRC	0.0532534	8.72e-08	0.0344299	X	69653856		IGR-island
cg23206017	KIRC	0.0914414	9.19e-08	0.0362692	X	34647840	TMEM47	3'UTR-opensea
cg23279136	KIRC	-0.0672419	5.06e-09	0.0019975	X	74375966	ABCB7	1stExon-opensea
cg23387422	KIRC	-0.168262	1.54e-16	6.07e-11	X	153637603	DNASE1L1	TSS200-shelf
cg23432301	KIRC	0.146798	6.07e-19	2.39e-13	X	55650979	FOXR2	1stExon-opensea
cg23455407	KIRC	0.043577	1.49e-08	0.00588506	X	70288342	SNX12	TSS200-island
cg23497752	KIRC	0.115123	4.98e-14	1.96e-08	X	153598077	FLNA	Body-shore
cg23530721	KIRC	-0.0967141	9.92e-12	3.91e-06	X	23801067	SAT1	TSS1500-island
cg23696472	KIRC	0.0565434	2.76e-09	0.00109081	X	53111786	TSPYL2	1stExon-island
cg23709838	KIRC	-0.105431	1.97e-12	7.78e-07	X	48768883	SLC35A2	1stExon-island
cg23712855	KIRC	0.0708242	8.46e-11	3.34e-05	X	153991009	DKC1	TSS200-island
cg23851088	KIRC	0.140537	8.07e-10	0.000318763	X	40004432	BCOR	5'UTR-island
cg23991947	KIRC	0.0682125	3.29e-09	0.00130051	X	48397845	TBC1D25	TSS1500-island
cg23993375	KIRC	-0.134918	7.7e-13	3.04e-07	X	56589951	UBQLN2	TSS200-island
cg24000816	KIRC	0.0870443	6.57e-16	2.59e-10	X	69501942	RAB41	TSS200-opensea
cg24046087	KIRC	-0.115721	1.98e-13	7.81e-08	X	153095663	PDZD4	Body-island
cg24123780	KIRC	0.0497624	1.16e-09	0.000457581	X	23761651	ACOT9	TSS1500-shore
cg24186901	KIRC	0.0754824	1.41e-11	5.57e-06	X	68835895	EDA	TSS200-island
cg24194941	KIRC	0.0547951	1.08e-07	0.0425017	X	154444570	VBP1	TSS200-opensea
cg24208785	KIRC	-0.093967	1.72e-08	0.00678996	X	40013348	BCOR	5'UTR-island
cg24324483	KIRC	0.0768357	2.23e-08	0.00879534	X	152876286		IGR-shore
cg24496423	KIRC	0.0906148	1.21e-10	4.76e-05	X	153046480	SRPK3	5'UTR-island
cg24536689	KIRC	0.105705	5.15e-12	2.03e-06	X	17673760	NHS	Body-island
cg24547622	KIRC	0.0274634	2.06e-08	0.008134	X	23761653	ACOT9	TSS1500-shore
cg24627956	KIRC	0.0556719	4.01e-09	0.00158306	X	152066599		IGR-island
cg24690818	KIRC	-0.116458	1.92e-16	7.57e-11	X	112084127	AMOT	TSS200-island
cg24706857	KIRC	-0.147221	2.55e-09	0.00100491	X	150859549		IGR-shelf
cg24712639	KIRC	0.0465586	3.36e-08	0.0132718	X	46429676		IGR-shelf
cg24735165	KIRC	0.0491121	4.94e-10	0.00019501	X	153218313	HCFC1	Body-shore
cg24787889	KIRC	-0.0534916	3.75e-09	0.00147963	X	48768632	SLC35A2	Body-shore
cg24816350	KIRC	-0.0729312	3.2e-08	0.0126209	X	71526972	CITED1	TSS1500-island
cg24829975	KIRC	0.0500977	8.88e-08	0.0350713	X	100878548	ARMCX3	5'UTR-opensea
cg24831179	KIRC	0.0652023	4.34e-10	0.000171143	X	119005594	RNF113A	5'UTR-island
cg24834461	KIRC	-0.157282	1.2e-15	4.73e-10	X	153637645	DNASE1L1	TSS200-shelf
cg24863802	KIRC	0.0555487	8.02e-10	0.000316461	X	151999558	NSDHL	5'UTR-island
cg24931094	KIRC	-0.0638565	9.03e-13	3.57e-07	X	119737891	MCTS1	5'UTR-opensea
cg24932289	KIRC	-0.079217	2.91e-08	0.0114765	X	40036253	BCOR	5'UTR-island
cg25078813	KIRC	0.0812432	7.14e-12	2.82e-06	X	138287654	FGF13	TSS1500-shore
cg25124605	KIRC	0.0535116	4.87e-08	0.0192313	X	129116500	BCORL1	TSS200-island
cg25125864	KIRC	0.0588693	6.96e-08	0.0274594	X	49086910	CACNA1F	Body-shore
cg25158628	KIRC	-0.0764239	1.63e-09	0.000644768	X	17879602	RAI2	TSS200-island
cg25206760	KIRC	-0.0963772	3.25e-14	1.28e-08	X	51636664	MAGED1	5'UTR-shore
cg25223355	KIRC	-0.0608375	2.98e-12	1.18e-06	X	15511437	PIR	1stExon-island
cg25223408	KIRC	0.196178	1.57e-16	6.21e-11	X	130207219	FLJ30058	5'UTR-island
cg25228188	KIRC	0.0656883	5.19e-08	0.0204796	X	138287039	FGF13	5'UTR-island
cg25237542	KIRC	0.0538479	2.1e-08	0.00829941	X	142722494	SLITRK4	5'UTR-island
cg25298085	KIRC	0.100545	1.6e-08	0.00630644	X	11621141	ARHGAP6	Body-opensea
cg25452343	KIRC	0.0924492	2.7e-10	0.000106653	X	152878258		IGR-shelf
cg25496213	KIRC	-0.0582772	5.99e-12	2.36e-06	X	101854377	ARMCX5	5'UTR-island
cg25549758	KIRC	0.128351	5.97e-14	2.36e-08	X	70435082	BCYRN1	Body-opensea
cg25576048	KIRC	0.0672983	4.66e-09	0.00184137	X	100805516	ARMCX1	1stExon-shelf
cg25619303	KIRC	-0.072251	6.89e-11	2.72e-05	X	40017965	BCOR	5'UTR-shore
cg25622910	KIRC	-0.0777435	9.03e-09	0.00356422	X	119737885	MCTS1	5'UTR-opensea
cg25692732	KIRC	0.0869584	4.1e-14	1.62e-08	X	153715426	UBL4A	TSS1500-shore
cg25729795	KIRC	0.173082	1.53e-15	6.02e-10	X	130216901	FLJ30058	Body-island
cg25730864	KIRC	0.0772327	2.8e-10	0.000110666	X	84498937	ZNF711	TSS200-island
cg25790081	KIRC	0.0549991	2.83e-08	0.0111656	X	67718547	YIPF6	TSS1500-island
cg25790279	KIRC	-0.149164	2.72e-26	1.07e-20	X	153602509	FLNA	5'UTR-shore
cg25821416	KIRC	0.024705	1.52e-08	0.0060016	X	47431407	SYN1	3'UTR-shelf
cg25852925	KIRC	0.0803488	1.96e-14	7.73e-09	X	149531527		IGR-island
cg25967516	KIRC	0.0609131	8.74e-08	0.0345203	X	100805271	ARMCX1	TSS1500-shelf
cg25968748	KIRC	0.0655052	4.62e-08	0.0182328	X	117862288	IL13RA1	Body-shore
cg25988710	KIRC	0.14189	5.36e-09	0.00211678	X	72667379	CDX4	1stExon-island
cg26020914	KIRC	-0.0856841	7.09e-08	0.0279947	X	18444359	CDKL5	5'UTR-island
cg26023405	KIRC	0.0672831	5.47e-10	0.000215953	X	117629911	DOCK11	5'UTR-island
cg26039676	KIRC	-0.0718407	6.78e-09	0.00267778	X	134478549	ZNF449	TSS200-shore
cg26062907	KIRC	0.0833307	1.43e-08	0.00564009	X	15683192	TMEM27	TSS200-opensea
cg26105341	KIRC	-0.0629288	6.18e-09	0.00244083	X	153060354	IDH3G	TSS1500-island
cg26119746	KIRC	0.0619912	2.52e-08	0.00994914	X	108976838	ACSL4	TSS1500-island
cg26159385	KIRC	0.0979877	3.52e-13	1.39e-07	X	152912611	DUSP9	5'UTR-island
cg26185620	KIRC	-0.14996	1.59e-10	6.26e-05	X	40067148		IGR-shelf
cg26301245	KIRC	0.0841287	4.94e-11	1.95e-05	X	46405090	ZNF674	TSS200-island
cg26318441	KIRC	-0.0892548	6.87e-09	0.00271057	X	9753940	SHROOM2	TSS1500-island
cg26327984	KIRC	-0.116601	6.85e-45	2.71e-39	X	42637506	PPP1R2P9	TSS200-shore
cg26333397	KIRC	0.0579943	9.33e-11	3.68e-05	X	49048031	SYP	Body-island
cg26335568	KIRC	0.0830871	6.37e-10	0.000251624	X	55026135	APEX2	TSS1500-shore
cg26518560	KIRC	-0.0394609	7.13e-09	0.00281563	X	53123428		IGR-island
cg26545730	KIRC	-0.0935737	7.49e-14	2.96e-08	X	70315657	FOXO4	TSS1500-island
cg26590811	KIRC	-0.0502054	4.9e-08	0.0193455	X	153607981	EMD	Body-island
cg26602702	KIRC	0.0383876	2.1e-11	8.3e-06	X	153316012	MECP2	Body-opensea
cg26680189	KIRC	0.0604704	8.27e-11	3.27e-05	X	48659965	HDAC6	TSS1500-island
cg26744454	KIRC	0.0482006	7e-10	0.000276378	X	77359613	PGK1	TSS200-island
cg26785999	KIRC	-0.0723038	7.27e-08	0.0286943	X	102885043	TCEAL1	Body-shore
cg26799772	KIRC	0.0574764	1.2e-07	0.0473245	X	153775496	G6PD	5'UTR-island
cg26883351	KIRC	-0.063962	1.28e-08	0.00504906	X	37208437	PRRG1	TSS200-shore
cg26965695	KIRC	0.120408	1.24e-11	4.91e-06	X	23926980	CXorf58	5'UTR-shore
cg27123903	KIRC	0.0509591	3e-08	0.0118376	X	153672721	FAM50A	Body-island
cg27166673	KIRC	-0.0696471	3.64e-08	0.0143655	X	11683995	ARHGAP6	TSS200-island
cg27187671	KIRC	0.0638728	7.88e-10	0.000310953	X	70752936	OGT	1stExon-island
cg27271445	KIRC	-0.0819061	6.91e-09	0.00272617	X	153060150	IDH3G	TSS200-island
cg27274135	KIRC	0.155237	6.67e-09	0.00263321	X	129093798		IGR-shelf
cg27313362	KIRC	0.0443353	8.38e-10	0.000330711	X	53585570	HUWE1	Body-opensea
cg27389609	KIRC	-0.0804087	6.38e-08	0.0251755	X	149531084		IGR-island
cg27453644	KIRC	-0.100018	7.29e-09	0.00287584	X	152990774	BCAP31	TSS1500-island
cg27525527	KIRC	-0.0701085	3.46e-15	1.37e-09	X	51636671	MAGED1	5'UTR-shore
cg27595778	KIRC	0.101812	2.06e-18	8.12e-13	X	131624071	MBNL3	TSS200-island
cg27615590	KIRC	0.0601893	8.05e-08	0.0317833	X	70752883	OGT	TSS200-island
cg27633753	KIRC	-0.0827004	2.66e-10	0.000105101	X	128674222	OCRL	TSS200-island
cg00408231	KIRP	-0.149953	2.12e-14	8.29e-09	X	100807848	ARMCX1	5'UTR-island
cg01918534	KIRP	-0.119361	1.62e-09	0.000634312	X	118828926		IGR-shore
cg02063752	KIRP	0.180649	1.2e-07	0.046901	X	47054413	UBA1	5'UTR-shore
cg02991082	KIRP	0.041425	1.39e-08	0.00544793	X	106961541	TSC22D3	TSS1500-shore
cg03122476	KIRP	-0.0534513	8.38e-09	0.0032818	X	14024917	GEMIN8	3'UTR-opensea
cg03781262	KIRP	0.053959	2.85e-09	0.00111477	19	58879871	ZNF837	Body-island
cg04624564	KIRP	-0.0985388	6.46e-08	0.0252985	X	73325368	NCRNA00182	Body-island
cg05393376	KIRP	0.104812	6.1e-08	0.0238753	X	53467938		IGR-shore
cg05692422	KIRP	-0.0990487	8.97e-12	3.51e-06	X	42637044	PPP1R2P9	Body-island
cg06691299	KIRP	0.123152	5.11e-17	2e-11	X	47077361	CDK16	TSS1500-island
cg06833902	KIRP	-0.0998906	2.37e-08	0.00928321	X	44703210	DUSP21	TSS200-shore
cg08675092	KIRP	0.0841123	2.71e-34	1.06e-28	6	32811181	PSMB8	Body-shore
cg08758558	KIRP	0.108983	6.91e-19	2.7e-13	X	45046434	CXorf36	Body-opensea
cg09167861	KIRP	0.163917	3.72e-09	0.00145523	X	135251741	FHL1	Body-opensea
cg10256077	KIRP	0.0833965	5.02e-13	1.96e-07	16	89341851	ANKRD11	Body-shelf
cg10572195	KIRP	0.0580157	5.79e-13	2.27e-07	10	5681208	ASB13	Body-shelf
cg11640565	KIRP	-0.03502	2.51e-10	9.85e-05	X	7137913	STS	Body-opensea
cg13638484	KIRP	0.049771	5.16e-08	0.0202202	X	47077907	CDK16	1stExon-island
cg18388301	KIRP	-0.0515265	9.27e-10	0.000362917	X	110867658		IGR-island
cg18515545	KIRP	0.143357	4.62e-11	1.81e-05	X	15288312	ASB9	TSS200-opensea
cg18595639	KIRP	0.0654917	7.34e-10	0.000287411	1	9324274	H6PD	Body-island
cg19261513	KIRP	0.232714	1.05e-10	4.11e-05	X	47057322	UBA1	5'UTR-shelf
cg19588538	KIRP	0.0955142	2.22e-16	8.69e-11	10	5693331	ASB13	Body-opensea
cg19822434	KIRP	0.139495	2.83e-14	1.11e-08	X	118744347		IGR-shelf
cg22332233	KIRP	0.223891	8.58e-16	3.36e-10	X	48897515	TFE3	Body-shelf
cg23432301	KIRP	0.186709	1.03e-09	0.000404276	X	55650979	FOXR2	1stExon-opensea
cg24671891	KIRP	-0.0746911	5.25e-08	0.0205608	X	12601783	FRMPD4	Body-island
cg25298085	KIRP	0.161581	1.17e-11	4.57e-06	X	11621141	ARHGAP6	Body-opensea
cg26327984	KIRP	-0.10168	5.49e-08	0.0215144	X	42637506	PPP1R2P9	TSS200-shore
cg00023415	LIHC	0.119144	2.49e-09	0.000907005	X	48435152	RBM3	Body-shore
cg00481999	LIHC	0.153582	1.31e-11	4.77e-06	X	47696603	ZNF81	5'UTR-shore
cg00524486	LIHC	0.0854673	1.09e-08	0.00396592	11	1244110	MUC5B	TSS200-shelf
cg00576774	LIHC	0.168009	8.54e-19	3.11e-13	7	28725676	CREB5	TSS200-opensea
cg00743068	LIHC	0.125576	9.43e-10	0.000343037	X	77041832	ATRX	TSS200-shore
cg00816548	LIHC	0.142411	7.53e-08	0.0274045	X	77154821	COX7B	TSS200-shelf
cg00892567	LIHC	0.185941	6.95e-08	0.0252885	20	56323934		IGR-shore
cg00935394	LIHC	0.123218	1.98e-09	0.000719501	X	11129115	HCCS	TSS1500-shore
cg00981643	LIHC	0.117278	2.6e-08	0.00944403	X	153363708	MECP2	TSS1500-shore
cg01055931	LIHC	0.12943	9.37e-09	0.00340916	X	153583236	FLNA	Body-shelf
cg01078706	LIHC	0.22179	1.45e-16	5.27e-11	X	102024320		IGR-shore
cg01084693	LIHC	0.225958	8.36e-09	0.00304141	20	56324074		IGR-island
cg01284289	LIHC	0.127304	5.88e-08	0.021385	12	66025635		IGR-opensea
cg01309671	LIHC	0.10459	3.42e-08	0.0124508	X	133941225	FAM122C	5'UTR-opensea
cg01314643	LIHC	0.133998	2.77e-09	0.00100917	X	62570863	SPIN4	5'UTR-shore
cg01364755	LIHC	0.241156	2.38e-09	0.000865224	10	1370694	ADARB2	Body-shore
cg01410230	LIHC	0.116683	6.09e-09	0.00221768	X	100645860	RPL36A	TSS200-island
cg01460974	LIHC	0.150975	3.34e-12	1.22e-06	X	62975657	ARHGEF9	TSS1500-shore
cg01530482	LIHC	-0.170754	2.16e-12	7.86e-07	11	1976432	MRPL23	Body-shore
cg01567000	LIHC	0.105826	4.17e-10	0.000151837	X	135991334		IGR-shore
cg01645729	LIHC	0.155638	1.27e-08	0.00462607	2	131582240		IGR-opensea
cg01657758	LIHC	-0.11846	9.65e-11	3.51e-05	11	121349740	SORL1	Body-opensea
cg01683788	LIHC	0.187085	3.98e-13	1.45e-07	X	11777794	MSL3	5'UTR-shore
cg01714932	LIHC	-0.220782	3.61e-21	1.31e-15	12	9360854	PZP	1stExon-opensea
cg01747155	LIHC	0.143765	3.36e-08	0.0122132	X	154842516	TMLHE	5'UTR-island
cg01780361	LIHC	0.158218	2.54e-11	9.24e-06	X	56590386	UBQLN2	1stExon-island
cg01851385	LIHC	0.10918	6.78e-10	0.000246679	X	10125135	CLCN4	5'UTR-shore
cg01927625	LIHC	0.144294	1.12e-08	0.00408272	X	69502017	RAB41	TSS200-opensea
cg01961752	LIHC	-0.230862	5.36e-08	0.0195004	1	1109012	TTLL10	TSS1500-shore
cg02061213	LIHC	0.176886	5.23e-08	0.019049	X	107068771	MID2	TSS1500-shore
cg02232922	LIHC	0.0419835	2.43e-09	0.000885616	X	118532809	SLC25A43	TSS1500-shore
cg02326006	LIHC	0.118285	3.65e-11	1.33e-05	X	62974433	ARHGEF9	1stExon-shore
cg02501924	LIHC	0.13045	4.08e-08	0.0148389	X	99891813	TSPAN6	TSS200-shore
cg02523105	LIHC	0.17167	2.31e-16	8.41e-11	X	134232832	NCRNA00087	TSS200-island
cg02537309	LIHC	-0.0917459	3.15e-16	1.15e-10	16	30680763	FBRS	Body-opensea
cg02553054	LIHC	0.14173	7.3e-09	0.00265742	12	50478480	SMARCD1	TSS1500-shore
cg02604522	LIHC	0.18664	4.33e-10	0.000157626	22	46330821	WNT7B	Body-shelf
cg02714492	LIHC	0.177334	1.76e-10	6.42e-05	X	68836610	EDA	3'UTR-island
cg02732801	LIHC	0.262232	2.4e-08	0.00871751	X	152066328		IGR-island
cg02737554	LIHC	0.162084	3.91e-10	0.000142227	3	36690229		IGR-opensea
cg02742139	LIHC	0.109752	1.63e-08	0.00594906	X	153776358	IKBKG	5'UTR-shore
cg02870820	LIHC	0.140195	7.38e-09	0.0026852	19	56003211	SSC5D	Body-shore
cg02876326	LIHC	-0.200186	1.03e-07	0.0374357	19	46995757	PNMAL2	1stExon-shore
cg03020597	LIHC	0.0950461	2.44e-08	0.00887975	X	144898810	SLITRK2	TSS1500-shore
cg03039483	LIHC	0.135995	8.21e-12	2.99e-06	X	83757499	HDX	TSS200-opensea
cg03040210	LIHC	0.123275	5.71e-09	0.00207826	X	131624077	MBNL3	TSS200-island
cg03096488	LIHC	0.141373	1.27e-07	0.0460808	X	66765289	AR	1stExon-shore
cg03122511	LIHC	0.113726	4.29e-08	0.0156144	X	119077820	NKAP	TSS200-shore
cg03127563	LIHC	0.0555373	5.82e-08	0.0211917	8	38385808	C8orf86	Body-opensea
cg03180953	LIHC	-0.115336	1.93e-11	7.03e-06	16	1842505	IGFALS	Body-island
cg03266942	LIHC	0.108601	2.83e-11	1.03e-05	X	24712207	POLA1	Body-island
cg03267527	LIHC	0.128661	3.14e-08	0.0114276	X	102510314	TCEAL8	TSS200-opensea
cg03273615	LIHC	0.165674	3.81e-13	1.39e-07	X	106362373	RBM41	TSS1500-shore
cg03449040	LIHC	0.109497	8.87e-09	0.00322816	X	10094363	WWC3	Body-island
cg03575468	LIHC	0.115458	2.06e-09	0.000749805	X	19362613	PDHA1	Body-shore
cg03611809	LIHC	-0.0921794	1.13e-08	0.00410657	1	43709209		IGR-opensea
cg03661529	LIHC	0.14877	4.7e-10	0.000170947	X	77041828	ATRX	TSS200-shore
cg03664928	LIHC	0.253772	1.33e-11	4.84e-06	X	53029937		IGR-island
cg03672021	LIHC	0.131959	7e-14	2.55e-08	X	153602658	FLNA	5'UTR-shore
cg03732411	LIHC	0.161608	3.51e-08	0.0127561	X	136134475		IGR-shore
cg03748858	LIHC	0.159579	1.23e-09	0.000447901	X	69502014	RAB41	TSS200-opensea
cg03760191	LIHC	-0.0980753	3.2e-11	1.16e-05	10	22623047		IGR-shore
cg03817616	LIHC	0.056065	1.29e-07	0.0468439	X	63615495	MTMR8	TSS200-shore
cg03823092	LIHC	0.123528	6.63e-08	0.0241198	X	99891789	TSPAN6	5'UTR-island
cg03834574	LIHC	0.366131	3.23e-08	0.0117602	X	56259094	KLF8	5'UTR-island
cg03927113	LIHC	0.102512	1.66e-12	6.06e-07	X	119738603	MCTS1	Body-opensea
cg04064330	LIHC	0.123105	1.16e-07	0.042042	X	153063892	SSR4	3'UTR-shelf
cg04163216	LIHC	-0.216375	4.67e-08	0.0169912	1	9777888	PIK3CD	Body-shore
cg04274356	LIHC	0.218582	1.22e-07	0.0443734	10	45248889		IGR-opensea
cg04297329	LIHC	0.177708	1.84e-08	0.00669537	X	72434720	NAP1L2	TSS200-opensea
cg04329125	LIHC	-0.210073	5.99e-08	0.0218093	14	105945022	CRIP2	Body-island
cg04455030	LIHC	0.13424	6.84e-10	0.000248819	X	129402160	ZNF280C	5'UTR-shore
cg04486022	LIHC	0.217161	1.08e-08	0.00393196	X	130207446	FLJ30058	5'UTR-island
cg04592144	LIHC	0.210807	6.32e-09	0.00230013	5	172899456		IGR-opensea
cg04595053	LIHC	0.107817	2.88e-08	0.0104872	X	70751421	OGT	TSS1500-shore
cg04675306	LIHC	0.151888	1.24e-07	0.0452753	X	135067450	SLC9A6	TSS200-shore
cg04740028	LIHC	0.149529	2.73e-08	0.00994825	X	47383436		IGR-island
cg04741284	LIHC	0.232675	1.89e-11	6.86e-06	20	56324226		IGR-island
cg04777103	LIHC	0.100997	3.08e-12	1.12e-06	X	119738402	MCTS1	TSS200-opensea
cg04855977	LIHC	0.0847399	1e-10	3.64e-05	X	128977653	ZDHHC9	TSS200-island
cg05002732	LIHC	0.0292944	1.01e-08	0.00367673	11	19262474	E2F8	1stExon-island
cg05062489	LIHC	0.239908	1.11e-11	4.04e-06	3	109404367		IGR-opensea
cg05135252	LIHC	-0.161782	7.72e-10	0.000281043	16	85372478		IGR-opensea
cg05143403	LIHC	0.115718	3.14e-09	0.00114079	X	55744049	RRAGB	TSS200-opensea
cg05193141	LIHC	0.14258	5.95e-08	0.0216393	X	49777878	MIR502	TSS1500-opensea
cg05302110	LIHC	0.0846296	8.7e-08	0.0316681	X	50214570	DGKK	TSS1500-island
cg05456652	LIHC	-0.177898	1.45e-09	0.000527218	X	34960884	FAM47B	TSS200-shore
cg05462236	LIHC	0.186551	6.32e-10	0.000229823	X	63615456	MTMR8	TSS200-shore
cg05491276	LIHC	0.150031	6.39e-08	0.0232409	X	68836772	EDA	3'UTR-island
cg05511138	LIHC	0.156994	3.08e-08	0.0112142	X	11682622	ARHGAP6	1stExon-island
cg05688478	LIHC	0.197411	1.33e-13	4.83e-08	X	128789194	APLN	TSS1500-island
cg05707815	LIHC	0.124437	1.78e-08	0.00648453	X	71934233	PHKA1	TSS1500-island
cg05813650	LIHC	0.1162	2.62e-12	9.54e-07	1	2339995	PEX10	Body-island
cg05895666	LIHC	0.0633797	1.24e-12	4.51e-07	X	118532787	SLC25A43	TSS1500-shore
cg06126323	LIHC	0.137756	3.19e-08	0.0116052	X	68836571	EDA	Body-island
cg06149981	LIHC	0.115774	1.02e-07	0.0371643	11	1243947	MUC5B	TSS1500-shelf
cg06217046	LIHC	0.130004	7.2e-09	0.00262122	X	10094247	WWC3	Body-island
cg06431415	LIHC	-0.20777	8.04e-08	0.0292513	X	133115985	GPC3	Body-shelf
cg06491573	LIHC	-0.0408668	7.15e-08	0.0260132	3	126062601	KLF15	Body-island
cg06655100	LIHC	0.395313	4.14e-10	0.000150554	X	56259373	KLF8	5'UTR-shore
cg06659128	LIHC	0.105439	4.11e-08	0.0149441	X	154842535	TMLHE	5'UTR-island
cg06691299	LIHC	0.134629	5.92e-08	0.0215413	X	47077361	CDK16	TSS1500-island
cg06891491	LIHC	0.158653	1.85e-08	0.00672093	X	134429749	ZNF75D	5'UTR-island
cg06908232	LIHC	0.137529	3.23e-11	1.18e-05	X	128977816	ZDHHC9	TSS1500-island
cg06936709	LIHC	0.174177	1.87e-08	0.00679744	X	83757476	HDX	TSS200-opensea
cg06980881	LIHC	0.083562	1.23e-07	0.0447395	X	100673431	ARMCX4	Body-island
cg07080808	LIHC	0.204967	3.45e-10	0.000125651	21	42514430	C21orf130	Body-opensea
cg07151929	LIHC	0.0899094	2.13e-11	7.77e-06	X	30907787	MAP3K7IP3	TSS1500-shore
cg07182248	LIHC	0.153225	3.06e-08	0.0111175	X	70839284	CXCR3	TSS1500-opensea
cg07297802	LIHC	0.0390523	3.43e-08	0.0124764	11	62622622	SNORD27	TSS200-shore
cg07419680	LIHC	0.163539	1.15e-07	0.0416935	X	134429972	ZNF75D	5'UTR-shore
cg07681139	LIHC	0.0831161	2.09e-08	0.00761339	X	103811716	IL1RAPL2	5'UTR-island
cg07796014	LIHC	0.145691	1.07e-09	0.00038905	X	11129290	HCCS	TSS200-island
cg07797805	LIHC	0.13169	1.99e-10	7.25e-05	20	25387977	GINS1	TSS1500-shore
cg07809144	LIHC	0.109159	3.21e-09	0.0011687	X	53584134	MIR98	TSS1500-opensea
cg07824888	LIHC	-0.0857456	1.19e-12	4.35e-07	11	1976536	MRPL23	Body-shore
cg07834773	LIHC	0.107603	8.83e-08	0.0321361	X	50214061	DGKK	TSS1500-shore
cg07869461	LIHC	0.119892	8.05e-08	0.0292999	X	11777744	MSL3	Body-shore
cg07979316	LIHC	0.0709811	8.09e-08	0.0294333	2	24306908	TP53I3	Body-shore
cg08090164	LIHC	-0.138408	1e-08	0.00364106	8	143859709	LYNX1	TSS200-shore
cg08222221	LIHC	0.123009	1.98e-08	0.0071992	X	139589617		IGR-shore
cg08321382	LIHC	0.258975	1.04e-07	0.0377701	2	239505772		IGR-opensea
cg08435532	LIHC	0.118179	8.47e-08	0.030811	X	46405451	ZNF674	TSS1500-shore
cg08437461	LIHC	0.144489	6.8e-12	2.47e-06	X	102611373	WBP5	TSS200-opensea
cg08438529	LIHC	0.167745	1.61e-08	0.00585713	16	1052939		IGR-shelf
cg08577442	LIHC	0.239105	1.3e-08	0.00473295	X	153712753	UBL4A	3'UTR-shore
cg08656747	LIHC	0.133856	1.28e-07	0.0466869	X	47696169	ZNF81	TSS200-island
cg08729600	LIHC	-0.280143	9.69e-16	3.53e-10	12	9360986	PZP	TSS200-opensea
cg08750061	LIHC	0.0806816	3.27e-09	0.00118879	X	117860789	IL13RA1	TSS1500-shore
cg08758558	LIHC	0.0512638	8.52e-11	3.1e-05	X	45046434	CXorf36	Body-opensea
cg08819417	LIHC	-0.0893209	2.12e-13	7.71e-08	16	4659349	FAM100A	3'UTR-island
cg08846002	LIHC	0.167247	2.82e-09	0.00102746	X	134477026	ZNF75D	5'UTR-shore
cg08973688	LIHC	0.169616	1.23e-09	0.000447959	17	47983990		IGR-shelf
cg08978665	LIHC	0.184608	8.59e-09	0.00312652	16	3115707	IL32	5'UTR-opensea
cg08991015	LIHC	0.169128	1.07e-12	3.89e-07	X	134049419	MOSPD1	TSS200-shore
cg09034929	LIHC	0.0687498	1.58e-09	0.000573674	X	70288225	SNX12	1stExon-island
cg09042787	LIHC	-0.0833742	9.59e-09	0.00348823	17	17463324	PEMT	Body-shore
cg09045008	LIHC	0.1276	2.58e-08	0.00940365	X	54043133	PHF8	Body-opensea
cg09058241	LIHC	0.109487	5.48e-13	1.99e-07	X	134232821	NCRNA00087	TSS200-island
cg09167861	LIHC	0.307967	2.28e-11	8.28e-06	X	135251741	FHL1	Body-opensea
cg09227616	LIHC	0.154045	4.72e-08	0.0171797	X	49056886	SYP	TSS1500-island
cg09284266	LIHC	0.124474	8.76e-09	0.0031885	X	105969630	RNF128	TSS1500-shore
cg09302010	LIHC	0.15887	2.75e-13	1e-07	X	57021502	SPIN3	5'UTR-shore
cg09335829	LIHC	0.186317	3.58e-09	0.00130372	X	43738323	MAOB	Body-shelf
cg09385630	LIHC	0.102599	6.09e-10	0.000221587	X	37209324	PRRG1	5'UTR-island
cg09513996	LIHC	0.0853574	5.69e-09	0.00207093	X	48685182		IGR-island
cg09533293	LIHC	0.112028	1.89e-08	0.0068603	15	60689670	ANXA2	5'UTR-shore
cg09536652	LIHC	0.208576	1.29e-07	0.0468063	X	119514843	ATP1B4	3'UTR-opensea
cg09628099	LIHC	0.136821	3.72e-12	1.35e-06	X	47863193	ZNF182	5'UTR-shore
cg09832443	LIHC	0.190446	1.22e-07	0.0444136	7	28612680	CREB5	Body-opensea
cg09863225	LIHC	0.0766861	5.39e-08	0.0196126	X	48335010	FTSJ1	5'UTR-island
cg09866104	LIHC	0.198652	9.89e-09	0.00360002	10	128039279	ADAM12	Body-opensea
cg09966745	LIHC	0.132738	7.29e-10	0.000265124	X	71934213	PHKA1	TSS200-island
cg10159238	LIHC	-0.130219	1.17e-07	0.0426244	X	69657408		IGR-shelf
cg10191725	LIHC	0.333341	5.04e-08	0.0183349	X	25034625	ARX	TSS1500-island
cg10310595	LIHC	0.0314592	3.72e-08	0.0135391	6	32908567	HLA-DMB	1stExon-opensea
cg10479063	LIHC	-0.22645	7.69e-18	2.8e-12	12	9360933	PZP	1stExon-opensea
cg10509982	LIHC	0.145694	6.11e-08	0.0222257	X	69502031	RAB41	TSS200-opensea
cg10530128	LIHC	0.128966	3.74e-10	0.000136025	X	48769550	SLC35A2	TSS1500-shore
cg10640333	LIHC	-0.140415	7.56e-11	2.75e-05	2	63280625	OTX1	Body-shore
cg10659052	LIHC	0.101562	3.82e-08	0.0139113	X	118724537	NKRF	Body-opensea
cg10723245	LIHC	0.0956036	5.22e-12	1.9e-06	X	103401991	MCART6	TSS1500-shore
cg10801213	LIHC	0.152022	4.4e-09	0.00160235	X	70150722	SLC7A3	5'UTR-island
cg11114242	LIHC	-0.177665	1.12e-07	0.0406969	6	136756541	MAP7	Body-opensea
cg11184796	LIHC	0.0817254	3.84e-08	0.0139871	X	49091986	CCDC22	5'UTR-island
cg11193681	LIHC	0.0862947	8.01e-11	2.91e-05	X	118986581	UPF3B	Body-shore
cg11211952	LIHC	0.261559	1.1e-07	0.0400817	3	63710728		IGR-opensea
cg11253356	LIHC	0.174183	4.44e-12	1.62e-06	X	103810926	IL1RAPL2	TSS200-shore
cg11332786	LIHC	0.131558	4.33e-08	0.01576	X	70402457		IGR-shore
cg11337025	LIHC	0.131157	3.29e-12	1.2e-06	X	106361672	RBM41	Body-island
cg11340371	LIHC	0.161377	1.86e-19	6.78e-14	X	74376241	ABCB7	TSS200-opensea
cg11618093	LIHC	0.0840023	7.12e-08	0.0259173	X	152000347	NSDHL	5'UTR-shore
cg11648471	LIHC	0.205721	2.36e-13	8.57e-08	X	14891001	MOSPD2	TSS1500-island
cg11664825	LIHC	0.155959	2.06e-08	0.00748988	X	100184343	XKRX	TSS1500-island
cg11717930	LIHC	0.168451	1.23e-12	4.48e-07	X	53111116	TSPYL2	TSS1500-shore
cg11860160	LIHC	0.137424	2.89e-08	0.0105083	X	153667209	GDI1	Body-shore
cg11967592	LIHC	0.103311	1.86e-12	6.76e-07	7	28725406	CREB5	Body-opensea
cg11998932	LIHC	0.193255	1.6e-09	0.000582446	7	3901843	SDK1	Body-opensea
cg12031346	LIHC	-0.136195	9.26e-09	0.00336882	18	72206701	CNDP1	Body-opensea
cg12096762	LIHC	0.111432	1.95e-08	0.00708953	15	88296044		IGR-opensea
cg12125741	LIHC	0.140031	5.57e-12	2.03e-06	X	103401380	MCART6	5'UTR-shore
cg12159575	LIHC	0.0292323	4.55e-14	1.65e-08	19	4910274	UHRF1	5'UTR-shore
cg12232778	LIHC	0.17434	2.54e-08	0.00925801	20	56324064		IGR-island
cg12352038	LIHC	0.0346995	1.5e-12	5.45e-07	20	62114621		IGR-shelf
cg12418739	LIHC	-0.119658	1.63e-15	5.94e-10	11	68115681	LRP5	Body-island
cg12431891	LIHC	0.202282	6.94e-08	0.0252407	3	114958699		IGR-opensea
cg12543132	LIHC	0.14114	8.72e-11	3.17e-05	X	23761732	ACOT9	TSS1500-shore
cg12614702	LIHC	0.127678	1.13e-07	0.0411573	X	48768927	SLC35A2	5'UTR-island
cg12833018	LIHC	0.152823	4.84e-09	0.00176016	11	62037564	SCGB2A2	TSS200-opensea
cg12858650	LIHC	0.136786	1.25e-10	4.54e-05	X	47039497	RBM10	Body-island
cg13024624	LIHC	0.111827	2.45e-13	8.9e-08	X	100663146	HNRNPH2	TSS200-island
cg13069450	LIHC	0.104184	2.38e-08	0.0086518	X	119077366	NKAP	1stExon-island
cg13114305	LIHC	0.324424	1.19e-07	0.0432882	X	100446736		IGR-island
cg13370916	LIHC	0.12524	4.08e-08	0.0148383	X	67867403	STARD8	TSS200-opensea
cg13372830	LIHC	0.123057	8.22e-08	0.0298963	X	47420231	ARAF	TSS1500-shore
cg13445089	LIHC	0.107887	9.49e-08	0.0345422	X	70819620	ACRC	Body-shelf
cg13606829	LIHC	0.135856	5.4e-11	1.97e-05	X	150565921	VMA21	Body-shore
cg13677598	LIHC	0.111423	2.71e-13	9.88e-08	X	69672096	DLG3	TSS200-shelf
cg13678641	LIHC	0.022268	2.93e-10	0.000106799	17	8113909	AURKB	TSS200-island
cg13788061	LIHC	0.301534	8.18e-08	0.0297641	X	78623020	ITM2A	5'UTR-opensea
cg13798825	LIHC	0.141052	1.6e-23	5.84e-18	7	28725358	CREB5	Body-opensea
cg14007036	LIHC	0.319006	1.17e-09	0.000425939	X	136113725	GPR101	1stExon-island
cg14013497	LIHC	0.203234	1.06e-13	3.86e-08	X	153770094	IKBKG	TSS1500-opensea
cg14023556	LIHC	-0.108156	4.25e-08	0.0154637	12	110007591	MMAB	Body-shelf
cg14106263	LIHC	0.15755	1.56e-09	0.00056881	X	129535683	RBMX2	TSS1500-shore
cg14132995	LIHC	0.111794	6.04e-08	0.0219651	X	48769370	SLC35A2	TSS200-island
cg14251060	LIHC	0.101485	5.4e-08	0.0196467	X	48463511	WDR13	3'UTR-opensea
cg14290616	LIHC	-0.132885	1.66e-14	6.03e-09	22	40420987	FAM83F	Body-shelf
cg14314132	LIHC	0.175691	5.54e-11	2.02e-05	X	118986954	UPF3B	1stExon-island
cg14314451	LIHC	0.171604	8.32e-12	3.03e-06	X	62780853	LOC92249	Body-opensea
cg14373380	LIHC	-0.146468	7.52e-15	2.74e-09	1	16268457	ZBTB17	3'UTR-shore
cg14474963	LIHC	0.148066	2.02e-09	0.000736332	X	133931354	FAM122B	TSS200-island
cg14549976	LIHC	0.0514686	7.38e-12	2.69e-06	18	77551537		IGR-shore
cg14725109	LIHC	0.122812	2.66e-16	9.69e-11	X	47696106	ZNF81	TSS200-island
cg15067665	LIHC	0.176052	7.11e-10	0.000258748	X	153166644	AVPR2	TSS1500-opensea
cg15133344	LIHC	-0.132614	1.77e-09	0.000644365	X	40034881	BCOR	5'UTR-island
cg15167893	LIHC	0.129381	5.81e-08	0.0211392	X	68836774	EDA	3'UTR-island
cg15570803	LIHC	0.113643	1.22e-08	0.00444351	X	70288412	SNX12	TSS200-shore
cg15686826	LIHC	0.0797613	9.57e-08	0.0348299	X	100183936	XKRX	TSS200-island
cg15879104	LIHC	0.116631	3.93e-09	0.00142858	X	153674100	FAM50A	Body-shore
cg15904427	LIHC	0.138203	2.31e-14	8.4e-09	X	133941745	FAM122C	Body-opensea
cg15906134	LIHC	0.118245	1.24e-07	0.0450303	X	49776567	CLCN5	Body-opensea
cg16049598	LIHC	0.128192	9.16e-09	0.00333169	X	106243646	MORC4	TSS200-shore
cg16166036	LIHC	0.103798	4.48e-09	0.00163152	X	10085753	WWC3	Body-island
cg16257533	LIHC	0.179822	5.76e-08	0.0209478	11	131934835	NTM	Body-opensea
cg16342780	LIHC	0.262523	4.99e-08	0.0181716	X	153030343	PLXNB3	5'UTR-shelf
cg16343842	LIHC	0.149957	1.9e-10	6.91e-05	X	150066722	CD99L2	Body-shore
cg16359563	LIHC	0.107779	8.63e-13	3.14e-07	X	64196429	ZC4H2	TSS200-opensea
cg16364066	LIHC	0.158332	3.31e-09	0.00120462	10	6821184		IGR-opensea
cg16409172	LIHC	0.201372	6.6e-16	2.4e-10	X	20008364	LOC729609	TSS1500-shore
cg16423624	LIHC	-0.188763	2.4e-14	8.73e-09	12	112220997	ALDH2	Body-opensea
cg16481170	LIHC	0.150506	1.28e-12	4.65e-07	X	74145312	KIAA2022	TSS200-shore
cg16496024	LIHC	-0.17235	4.81e-09	0.00175187	21	41239042	PCP4	TSS1500-opensea
cg16546861	LIHC	0.177887	4.48e-08	0.0163072	X	49022452	MAGIX	Body-island
cg16681914	LIHC	0.164753	4.17e-16	1.52e-10	X	11777654	MSL3	Body-shore
cg16689634	LIHC	0.192516	1.78e-09	0.000648156	1	47489539	CYP4X1	1stExon-island
cg17069396	LIHC	-0.170024	5.86e-08	0.0213237	20	2731102	EBF4	Body-island
cg17200690	LIHC	0.0745515	9.35e-08	0.0340365	6	33245619	B3GALT4	1stExon-shore
cg17220866	LIHC	0.149838	3.35e-08	0.0121824	X	37706296	DYNLT3	Body-island
cg17227030	LIHC	0.236589	1.94e-09	0.000707515	X	68837158	EDA	Body-shore
cg17322774	LIHC	0.184915	1.76e-08	0.00639712	7	158224817	PTPRN2	Body-opensea
cg17398485	LIHC	0.206775	7.54e-17	2.75e-11	X	118699448	CXorf56	TSS200-opensea
cg17464366	LIHC	0.127642	8.88e-09	0.00322951	X	64196495	ZC4H2	TSS200-opensea
cg17503853	LIHC	0.159507	8.28e-12	3.01e-06	X	49091797	CCDC22	TSS200-shore
cg17658266	LIHC	0.142267	5.62e-08	0.0204323	6	74978996		IGR-opensea
cg17731486	LIHC	0.199806	2.08e-11	7.58e-06	X	100878793	ARMCX3	5'UTR-opensea
cg17775340	LIHC	0.130424	1.16e-09	0.000422908	X	31284448	DMD	Body-shore
cg17818220	LIHC	0.149014	4.65e-13	1.69e-07	7	28725466	CREB5	Body-opensea
cg18041960	LIHC	0.212547	1.03e-08	0.00374362	11	123415568	GRAMD1B	Body-opensea
cg18086582	LIHC	0.0944218	5.15e-08	0.0187343	X	48459799	WDR13	Body-shelf
cg18159654	LIHC	0.181284	1.36e-08	0.00493283	X	17394810	NHS	Body-island
cg18322448	LIHC	0.0209675	5.56e-10	0.000202374	19	4910276	UHRF1	5'UTR-shore
cg18480706	LIHC	0.125465	5.74e-10	0.000208947	X	74742458	ZDHHC15	Body-shore
cg18515545	LIHC	0.164237	4.24e-15	1.54e-09	X	15288312	ASB9	TSS200-opensea
cg18701656	LIHC	0.163099	8.62e-08	0.0313817	X	144898803	SLITRK2	TSS1500-shore
cg18778986	LIHC	0.103243	4.5e-10	0.000163818	X	154842064	TMLHE	5'UTR-shore
cg18813010	LIHC	0.0896143	7.67e-08	0.0279217	X	102931660	MORF4L2	Body-opensea
cg18818432	LIHC	0.108841	1.07e-09	0.000390615	X	100663157	HNRNPH2	TSS200-island
cg18826958	LIHC	-0.221001	6.58e-08	0.0239406	22	46275235		IGR-shore
cg18976803	LIHC	0.121226	2.26e-10	8.22e-05	X	71934394	PHKA1	TSS1500-shore
cg19000468	LIHC	0.0665566	3.74e-08	0.013613	X	85302549	CHM	1stExon-opensea
cg19321437	LIHC	0.218055	6.7e-08	0.0243659	X	83757536	HDX	TSS200-opensea
cg19392138	LIHC	0.106529	1.16e-09	0.000423085	X	134479169	ZNF75D	TSS1500-shore
cg19403610	LIHC	0.263223	4.89e-08	0.0178014	10	128359014		IGR-opensea
cg19434750	LIHC	0.18688	7.21e-08	0.0262337	X	103217770	TMSB15B	5'UTR-shore
cg19532356	LIHC	0.229461	8.16e-09	0.0029697	X	50556710	SHROOM4	Body-island
cg19533991	LIHC	0.169517	3.49e-09	0.00126895	X	153671027	GDI1	3'UTR-shore
cg19541913	LIHC	0.122669	4.71e-13	1.71e-07	X	103401494	MCART6	5'UTR-island
cg19780684	LIHC	0.107157	4.85e-19	1.77e-13	X	15288115	ASB9	1stExon-opensea
cg19797013	LIHC	0.140505	9.87e-09	0.00358978	X	103411446	CXorf39	5'UTR-island
cg19822434	LIHC	0.126132	6.58e-30	2.4e-24	X	118744347		IGR-shelf
cg19836906	LIHC	0.120211	2.64e-10	9.62e-05	X	118987328	UPF3B	TSS1500-shore
cg19937286	LIHC	-0.294372	1.5e-08	0.00545133	X	40017092	BCOR	5'UTR-shore
cg19937618	LIHC	0.131925	2.4e-13	8.73e-08	X	48901183	TFE3	TSS200-island
cg20015269	LIHC	0.129871	9.08e-08	0.0330278	X	49687166	CLCN5	TSS200-island
cg20085077	LIHC	0.256581	9.53e-08	0.0346963	X	100740421	ARMCX4	Body-island
cg20086219	LIHC	0.210175	4.74e-10	0.000172525	4	105982613		IGR-opensea
cg20086420	LIHC	0.139149	2.25e-12	8.19e-07	X	48620337	GLOD5	Body-opensea
cg20202246	LIHC	0.208397	3.27e-10	0.000118963	X	118407296		IGR-island
cg20291091	LIHC	0.235951	6.47e-10	0.000235261	X	100806034	ARMCX1	5'UTR-shore
cg20584415	LIHC	0.138516	1.23e-08	0.00446638	X	69510172	KIF4A	5'UTR-shore
cg20590161	LIHC	0.139239	4.65e-10	0.000169214	X	57313197	FAAH2	5'UTR-opensea
cg20818151	LIHC	0.163212	5.09e-10	0.000185068	X	57618059	ZXDB	TSS1500-shore
cg20857470	LIHC	0.161631	5.63e-13	2.05e-07	X	10588738	MID1	5'UTR-shore
cg20898283	LIHC	0.181614	5.3e-10	0.000192942	14	75920198	JDP2	Body-opensea
cg20919227	LIHC	0.120221	1.18e-07	0.0428661	X	100663591	GLA	TSS1500-island
cg20968821	LIHC	-0.171407	3.56e-08	0.0129501	14	105522684	GPR132	5'UTR-opensea
cg20972834	LIHC	0.116105	2.37e-08	0.0086107	X	74375795	ABCB7	Body-opensea
cg21127593	LIHC	0.16227	2.3e-11	8.37e-06	X	133507742	PHF6	5'UTR-shore
cg21162029	LIHC	0.177519	1.37e-07	0.0498792	X	133306253		IGR-island
cg21205654	LIHC	0.0812114	1.29e-09	0.000470056	X	118110766	LONRF3	Body-shore
cg21224730	LIHC	0.212551	3.41e-08	0.0124099	X	123220554	STAG2	Body-opensea
cg21238234	LIHC	0.239375	4.93e-12	1.79e-06	15	83879539		IGR-shelf
cg21268422	LIHC	0.292332	2.69e-08	0.00980495	21	42620091	BACE2	Body-shelf
cg21284636	LIHC	0.130175	2.86e-10	0.0001041	X	71401009	PIN4	TSS1500-opensea
cg21288685	LIHC	-0.23296	7.91e-10	0.000287779	1	1109244	TTLL10	TSS200-shore
cg21417660	LIHC	0.145247	2.41e-08	0.0087515	X	102840997	TCEAL4	5'UTR-island
cg21457147	LIHC	0.136564	1.38e-08	0.00503894	13	45768695	GTF2F2	Body-opensea
cg21547183	LIHC	0.109301	1.39e-11	5.07e-06	X	135963051	RBMX	TSS200-shore
cg21613389	LIHC	0.221765	2.91e-09	0.00105868	17	2807593	RAP1GAP2	Body-opensea
cg21803791	LIHC	0.164099	1.45e-09	0.000529098	1	2340190	PEX10	Body-island
cg21917448	LIHC	0.199694	3.67e-08	0.0133542	1	20685179		IGR-opensea
cg22046661	LIHC	0.0442192	3.31e-11	1.2e-05	11	68890686		IGR-opensea
cg22152887	LIHC	-0.132247	4.01e-19	1.46e-13	11	72849944	FCHSD2	Body-shelf
cg22226984	LIHC	0.10439	1.12e-07	0.040815	X	47041168	RBM10	Body-shore
cg22332233	LIHC	0.1815	1.43e-24	5.21e-19	X	48897515	TFE3	Body-shelf
cg22396691	LIHC	0.0212803	6.34e-08	0.0230872	3	15106968	MRPS25	TSS200-island
cg22449896	LIHC	0.13915	1.29e-09	0.000468068	X	153402621		IGR-island
cg22522913	LIHC	0.154405	4.97e-12	1.81e-06	X	46696086	RP2	TSS1500-shore
cg22858728	LIHC	0.13856	4.99e-10	0.000181677	X	154034149	MPP1	TSS1500-shore
cg22880666	LIHC	0.15701	2.75e-14	1e-08	X	119076813	NKAP	Body-shore
cg22903370	LIHC	0.200946	3.4e-09	0.00123562	X	153058860	IDH3G	Body-shore
cg22980697	LIHC	0.180552	9.13e-08	0.0332101	10	16874865	CUBN	Body-opensea
cg23012676	LIHC	0.0669276	6.78e-13	2.47e-07	8	38385908	C8orf86	1stExon-opensea
cg23157067	LIHC	0.202967	1.75e-16	6.36e-11	X	105855386	CXorf57	1stExon-shore
cg23277098	LIHC	0.144221	7.81e-08	0.0284299	X	64754804	LAS1L	TSS200-island
cg23323745	LIHC	0.121461	1.37e-08	0.00499926	X	47696132	ZNF81	TSS200-island
cg23432159	LIHC	0.112978	5.76e-09	0.00209746	X	49009222		IGR-shelf
cg23575603	LIHC	-0.0650714	4.78e-08	0.0174065	13	50707753		IGR-island
cg23654174	LIHC	0.108148	6.82e-12	2.48e-06	1	47779667	STIL	5'UTR-shore
cg23663092	LIHC	0.111904	7.32e-10	0.000266333	X	23686290	PRDX4	Body-shore
cg23843398	LIHC	-0.0881909	3.88e-12	1.41e-06	2	242684072	D2HGDH	Body-opensea
cg23931323	LIHC	-0.167369	6.33e-09	0.00230444	11	73372278	PLEKHB1	Body-island
cg23991947	LIHC	0.13339	3.96e-08	0.0144173	X	48397845	TBC1D25	TSS1500-island
cg23994511	LIHC	-0.117207	3.2e-08	0.0116533	10	112060477	SMNDC1	Body-shelf
cg24076965	LIHC	0.098939	8.9e-09	0.00323698	X	128675022	OCRL	Body-shore
cg24263233	LIHC	0.173032	1.23e-10	4.49e-05	X	118699475	CXorf56	TSS200-opensea
cg24397241	LIHC	0.114801	7.4e-08	0.0269289	3	11227410	HRH1	5'UTR-opensea
cg24607755	LIHC	0.20062	2.57e-10	9.34e-05	11	36171375	LDLRAD3	Body-opensea
cg24737468	LIHC	0.168611	1.39e-09	0.000507062	X	110188323	PAK3	5'UTR-opensea
cg24880787	LIHC	0.192665	4.35e-08	0.0158465	X	144903661	SLITRK2	5'UTR-island
cg24979179	LIHC	0.123791	8.26e-08	0.0300467	X	70693460	BCYRN1	Body-opensea
cg25004840	LIHC	0.219419	2.23e-08	0.00811857	2	235330993		IGR-opensea
cg25077868	LIHC	0.170159	1.77e-08	0.00644156	X	150344264	GPR50	TSS1500-island
cg25078813	LIHC	0.12273	9.81e-08	0.0356863	X	138287654	FGF13	TSS1500-shore
cg25125864	LIHC	0.0920854	9.8e-10	0.000356559	X	49086910	CACNA1F	Body-shore
cg25158266	LIHC	0.135907	1.87e-09	0.000679958	X	101854056	ARMCX5	TSS1500-shore
cg25367647	LIHC	0.121886	1.48e-10	5.38e-05	X	103401960	MCART6	TSS1500-shore
cg25492195	LIHC	0.147957	1.53e-08	0.00558308	X	11129297	HCCS	TSS200-island
cg25564800	LIHC	0.0920541	1.17e-10	4.27e-05	3	122234134	KPNA1	TSS1500-shore
cg25576048	LIHC	0.29306	4.89e-08	0.0177861	X	100805516	ARMCX1	1stExon-shelf
cg25603752	LIHC	0.113042	3.77e-08	0.0137198	X	53123831		IGR-shore
cg25821416	LIHC	0.134011	1.21e-08	0.00439593	X	47431407	SYN1	3'UTR-shelf
cg25828221	LIHC	0.159156	1.93e-08	0.00700764	X	150347694	GPR50	Body-shore
cg25852925	LIHC	0.129343	1.63e-09	0.000594891	X	149531527		IGR-island
cg25910467	LIHC	0.10834	2.8e-08	0.010197	X	122865777	THOC2	Body-shore
cg25914109	LIHC	0.129963	3.67e-09	0.00133475	X	153050270	SRPK3	Body-shelf
cg26020695	LIHC	0.240639	4.54e-08	0.0165306	13	46355841	SIAH3	3'UTR-opensea
cg26112622	LIHC	0.223646	4.76e-15	1.73e-09	1	2339890	PEX10	Body-island
cg26351132	LIHC	0.195455	4.21e-08	0.0153117	17	47049890		IGR-opensea
cg26375010	LIHC	0.400643	1.21e-15	4.4e-10	X	118407852		IGR-shore
cg26558485	LIHC	0.174574	9.06e-09	0.00329521	1	47489282	CYP4X1	1stExon-island
cg26584771	LIHC	0.167489	1.12e-07	0.040586	X	74145551	KIAA2022	TSS1500-shore
cg26746069	LIHC	0.123546	6.48e-08	0.0235952	X	117479618	WDR44	TSS1500-island
cg26807533	LIHC	0.180201	6.85e-08	0.0249277	X	129039711	UTP14A	TSS1500-shore
cg26830958	LIHC	0.169314	3.44e-08	0.012502	4	1041664		IGR-shore
cg26861732	LIHC	-0.162479	1.07e-08	0.00389832	20	21372126		IGR-island
cg26907889	LIHC	0.134031	3.22e-08	0.0117018	X	70504058	NONO	5'UTR-shore
cg27000120	LIHC	0.165946	3.29e-13	1.2e-07	16	88917283	GALNS	Body-opensea
cg27055365	LIHC	0.178809	4.83e-08	0.0175611	1	117689356	VTCN1	3'UTR-opensea
cg27084087	LIHC	0.139531	9.8e-10	0.000356616	X	77239706	ATP7A	Body-opensea
cg27121959	LIHC	-0.254363	1.5e-08	0.00547452	11	100905070	PGR	3'UTR-opensea
cg27153798	LIHC	0.117927	6.41e-11	2.33e-05	X	47420292	ARAF	TSS1500-shore
cg27206903	LIHC	-0.0505629	1.74e-09	0.000632805	17	80006003	RFNG	3'UTR-shelf
cg27244773	LIHC	-0.203435	8.53e-08	0.0310335	17	43483116	ARHGAP27	1stExon-island
cg27301033	LIHC	0.125205	1.12e-08	0.00408122	X	30907909	MAP3K7IP3	TSS1500-shore
cg27333993	LIHC	0.0726426	7.54e-09	0.00274336	X	48432661	RBM3	TSS200-shore
cg27419400	LIHC	0.131211	1.42e-11	5.17e-06	X	74376313	ABCB7	TSS200-opensea
cg27464846	LIHC	0.177093	4.62e-10	0.000168178	16	88268600		IGR-shore
cg27595778	LIHC	0.104091	1.64e-12	5.96e-07	X	131624071	MBNL3	TSS200-island
cg27598017	LIHC	0.0521557	6.82e-10	0.000248148	4	104119803	CENPE	TSS1500-shore
cg27659014	LIHC	0.0219862	2.48e-08	0.00902117	15	40886649	CASC5	5'UTR-island
cg00310375	LUAD	0.0456513	6.99e-08	0.0260807	2	85906657		IGR-opensea
cg01046746	LUAD	0.256877	3.48e-09	0.00129928	X	150863961		IGR-island
cg02421543	LUAD	0.0433488	6.97e-08	0.0260035	1	93810826	DR1	TSS1500-shore
cg02576092	LUAD	0.0309214	1.91e-08	0.00711775	1	27668556	SYTL1	1stExon-opensea
cg03035653	LUAD	0.175364	1.19e-08	0.00442254	X	99662932	PCDH19	1stExon-island
cg03373115	LUAD	0.0530435	4.92e-09	0.00183532	1	64058883	PGM1	TSS200-shore
cg04797570	LUAD	0.0576702	3.67e-08	0.0137094	11	47587672	PTPMT1	Body-shore
cg05010865	LUAD	0.0747956	1.04e-14	3.87e-09	8	145049189	PLEC1	Body-island
cg05062178	LUAD	0.113361	1.07e-08	0.00399376	3	124605247	ITGB5	Body-island
cg05134041	LUAD	0.205043	1.08e-07	0.0404426	X	82763219	POU3F4	TSS200-shore
cg05454424	LUAD	-0.0828257	2.73e-08	0.0101899	X	42637578	PPP1R2P9	TSS200-shore
cg06322988	LUAD	0.0474041	6.23e-09	0.00232534	3	138725189	PRR23A	TSS200-island
cg06580745	LUAD	0.0493938	7.7e-08	0.0287255	17	4692790	GLTPD2	Body-island
cg06653141	LUAD	0.0622309	2.58e-12	9.64e-07	5	36745541		IGR-island
cg06854487	LUAD	0.0377757	4.66e-10	0.000173879	11	71791011	NUMA1	5'UTR-shore
cg07673466	LUAD	0.214951	4.59e-08	0.0171306	X	70363469	NLGN3	TSS1500-opensea
cg08149422	LUAD	0.0485788	1.75e-09	0.000654529	22	21983606	YDJC	Body-island
cg09179046	LUAD	0.0659554	2.06e-12	7.7e-07	16	14164850	MKL2	TSS1500-island
cg09496762	LUAD	0.058064	1.71e-08	0.00638181	20	42286524		IGR-island
cg09513996	LUAD	0.0938087	5.93e-10	0.000221396	X	48685182		IGR-island
cg10191725	LUAD	0.274507	2.28e-08	0.00849215	X	25034625	ARX	TSS1500-island
cg10451760	LUAD	0.201227	2.03e-11	7.56e-06	X	136649093	ZIC3	1stExon-island
cg11075346	LUAD	0.0552425	6.35e-11	2.37e-05	7	35735308	HERPUD2	TSS1500-shore
cg11224624	LUAD	0.05969	1.09e-07	0.0407493	8	145049280	PLEC1	Body-island
cg11395386	LUAD	0.258619	3.26e-12	1.22e-06	X	153360157	MECP2	Body-shelf
cg11824172	LUAD	0.112642	1.29e-07	0.0482626	1	60280096	HOOK1	TSS1500-shore
cg11863130	LUAD	0.299969	4.85e-12	1.81e-06	X	25029285	ARX	Body-shore
cg13151135	LUAD	0.0520648	1.3e-07	0.0484157	1	26560306	CCDC21	TSS1500-shore
cg13273097	LUAD	-0.166625	3.25e-11	1.21e-05	3	152879313	RAP2B	TSS1500-island
cg13495850	LUAD	0.0531026	6.47e-09	0.00241514	18	20715040	CABLES1	TSS1500-island
cg13775533	LUAD	0.235639	1.24e-17	4.62e-12	X	99663073	PCDH19	1stExon-island
cg13781574	LUAD	-0.249306	8.95e-11	3.34e-05	X	69675294	DLG3	Body-island
cg14822966	LUAD	0.056417	3.18e-10	0.000118664	4	1714979	SLBP	TSS1500-island
cg14836636	LUAD	0.04445	7.57e-11	2.82e-05	12	120106292	PRKAB1	Body-shore
cg16014770	LUAD	0.046471	3.48e-09	0.00129785	12	31882421	AMN1	TSS1500-island
cg16797777	LUAD	0.047114	3.26e-08	0.0121589	6	160389717	IGF2R	TSS1500-shore
cg17329292	LUAD	0.0804008	9.75e-09	0.00363747	1	33895890		IGR-shore
cg17566936	LUAD	0.0385033	3.98e-08	0.0148567	4	48271107	TEC	5'UTR-shore
cg19502998	LUAD	0.159815	3.12e-11	1.17e-05	X	40038858		IGR-shelf
cg19822434	LUAD	0.0830421	2.21e-10	8.23e-05	X	118744347		IGR-shelf
cg19897172	LUAD	0.0420187	1.01e-08	0.00377079	7	135347071	PL-5283	TSS200-island
cg20202246	LUAD	0.181749	1.79e-09	0.000667131	X	118407296		IGR-island
cg20575277	LUAD	0.138547	1.84e-12	6.86e-07	15	90728569	SEMA4B	5'UTR-island
cg22332233	LUAD	0.120395	3.23e-09	0.0012059	X	48897515	TFE3	Body-shelf
cg22478261	LUAD	0.0881084	4.33e-14	1.61e-08	20	49348806	PARD6B	Body-shore
cg22931402	LUAD	0.105178	1.46e-09	0.000543159	4	113207418	TIFA	TSS1500-shore
cg23074119	LUAD	0.0203844	1.2e-07	0.0447832	14	78174751	ALKBH1	TSS1500-shore
cg23909343	LUAD	0.0529343	6.29e-09	0.00234861	1	212457915	PPP2R5A	TSS1500-shore
cg24023026	LUAD	0.0637076	1.07e-07	0.0400515	11	66494785		IGR-shore
cg24155668	LUAD	0.0228935	1.1e-07	0.0411004	6	36098398	MAPK13	1stExon-island
cg25729795	LUAD	0.215849	8.05e-10	0.000300503	X	130216901	FLJ30058	Body-island
cg25988710	LUAD	0.189365	4.91e-08	0.0183215	X	72667379	CDX4	1stExon-island
cg26575445	LUAD	0.054864	7.25e-10	0.00027038	3	169756530	GPR160	5'UTR-island
cg27387615	LUAD	0.158809	2.05e-08	0.00764348	X	136627957		IGR-shore
cg27642428	LUAD	0.0496733	1.99e-11	7.42e-06	11	63705693	NAA40	TSS1500-shore
cg00016934	LUSC	-0.22101	8.66e-11	3.31e-05	X	40035961	BCOR	5'UTR-island
cg00029931	LUSC	0.129846	1.24e-07	0.0475274	X	100645741	RPL36A	TSS1500-shore
cg00115511	LUSC	0.11729	9.7e-08	0.0370673	X	46404799	LOC401588	TSS200-island
cg00179446	LUSC	0.141871	1.76e-11	6.73e-06	X	118986947	UPF3B	1stExon-island
cg00379371	LUSC	0.126938	1.45e-18	5.55e-13	X	48774742	PIM2	Body-shore
cg00428012	LUSC	0.106277	1.97e-09	0.000752215	X	77166217	ATP7A	1stExon-island
cg00428314	LUSC	0.104809	2.14e-08	0.00818372	X	118708830	UBE2A	Body-island
cg00433220	LUSC	0.201827	2.59e-18	9.88e-13	X	46697120	RP2	Body-shore
cg00481999	LUSC	0.20825	2.39e-29	9.13e-24	X	47696603	ZNF81	5'UTR-shore
cg00581583	LUSC	0.123787	5.52e-10	0.000211027	X	49047791	SYP	3'UTR-shore
cg00632374	LUSC	0.147184	4.72e-10	0.000180208	X	46432929	CHST7	TSS1500-shore
cg00690049	LUSC	0.186232	3.23e-12	1.23e-06	X	54834244	MAGED2	TSS1500-shore
cg00698744	LUSC	0.181995	2.91e-20	1.11e-14	X	53122826		IGR-shore
cg00723034	LUSC	0.135315	1.99e-10	7.62e-05	X	75393425	CXorf26	Body-opensea
cg00743068	LUSC	0.122736	1.5e-09	0.000573434	X	77041832	ATRX	TSS200-shore
cg00765885	LUSC	0.156247	3.63e-10	0.000138805	X	101771142	TMSB15A	5'UTR-shore
cg00787015	LUSC	0.143331	1.72e-12	6.58e-07	X	40506177	CXorf38	Body-island
cg00829575	LUSC	0.13976	1.94e-10	7.41e-05	X	38663062	MID1IP1	5'UTR-island
cg00940232	LUSC	0.0977543	4.74e-08	0.0180923	X	135962391	RBMX	Body-island
cg00963467	LUSC	0.103008	8.91e-08	0.0340394	X	150151737	HMGB3	TSS200-island
cg00988678	LUSC	0.107705	9.24e-14	3.53e-08	X	119005603	RNF113A	5'UTR-island
cg01003197	LUSC	0.146963	3.59e-09	0.00137178	X	67653925	OPHN1	TSS1500-shore
cg01078706	LUSC	0.154776	2.55e-09	0.000975591	X	102024320		IGR-shore
cg01081720	LUSC	0.199533	2.29e-17	8.76e-12	X	68047734	EFNB1	TSS1500-shore
cg01086868	LUSC	0.192678	5.89e-12	2.25e-06	X	66764531	AR	1stExon-shore
cg01169440	LUSC	0.141498	2.35e-11	8.99e-06	X	118603378	SLC25A5	Body-shore
cg01244877	LUSC	0.147004	5.93e-12	2.27e-06	X	153598902	FLNA	Body-island
cg01286388	LUSC	0.130359	1.99e-08	0.00759968	X	77151065	MAGT1	TSS200-island
cg01309671	LUSC	0.102386	4.1e-08	0.015657	X	133941225	FAM122C	5'UTR-opensea
cg01353903	LUSC	0.247027	1.74e-11	6.65e-06	X	99662650	PCDH19	1stExon-island
cg01372992	LUSC	0.102379	7.27e-09	0.00277748	X	130037175	ENOX2	5'UTR-shore
cg01405303	LUSC	0.0946512	1.79e-08	0.00685575	X	152066574		IGR-island
cg01410230	LUSC	0.12768	1.07e-11	4.08e-06	X	100645860	RPL36A	TSS200-island
cg01430241	LUSC	0.132857	1.22e-08	0.00466656	X	153665714	GDI1	Body-island
cg01445307	LUSC	0.113046	7.95e-09	0.00303703	X	21959520	SMS	Body-island
cg01461762	LUSC	0.132045	7.6e-10	0.000290203	X	100663470	GLA	TSS1500-island
cg01567000	LUSC	0.144009	1.93e-19	7.38e-14	X	135991334		IGR-shore
cg01575816	LUSC	0.167498	1.18e-17	4.49e-12	X	107683385	COL4A5	1stExon-opensea
cg01579322	LUSC	0.0905222	1.04e-07	0.0398159	X	54209148	FAM120C	1stExon-island
cg01668271	LUSC	0.0905793	1.16e-07	0.0442336	X	47696333	ZNF81	1stExon-island
cg01683788	LUSC	0.203431	1e-23	3.84e-18	X	11777794	MSL3	5'UTR-shore
cg01716666	LUSC	0.133545	2.48e-10	9.48e-05	X	119077648	NKAP	1stExon-island
cg01717812	LUSC	0.209769	1.99e-25	7.61e-20	X	74376285	ABCB7	TSS200-opensea
cg01747155	LUSC	0.176894	3.34e-10	0.000127709	X	154842516	TMLHE	5'UTR-island
cg01771673	LUSC	0.149822	2.1e-10	8.04e-05	X	106361539	RBM41	Body-island
cg01780361	LUSC	0.151274	2.01e-10	7.7e-05	X	56590386	UBQLN2	1stExon-island
cg01804836	LUSC	0.115619	1.35e-09	0.000514882	X	102565738	BEX2	1stExon-island
cg01828434	LUSC	0.133813	5.56e-15	2.13e-09	X	106960491	TSC22D3	TSS1500-shore
cg01831944	LUSC	0.143261	4.49e-15	1.72e-09	X	95939323	DIAPH2	TSS1500-shore
cg01896298	LUSC	0.154954	5.52e-11	2.11e-05	X	69643036	GDPD2	1stExon-opensea
cg01913024	LUSC	0.0869131	3.72e-09	0.00142054	X	129300230	AIFM1	TSS1500-shore
cg02025065	LUSC	0.104065	3.84e-09	0.00146545	X	57148257	SPIN2B	TSS1500-shore
cg02061213	LUSC	0.201943	3.61e-08	0.013805	X	107068771	MID2	TSS1500-shore
cg02077027	LUSC	0.303657	1.61e-10	6.15e-05	X	19817931	SH3KBP1	Body-opensea
cg02129889	LUSC	0.136288	2.03e-09	0.000776497	X	118925789	RPL39	TSS200-island
cg02155838	LUSC	0.175188	1.06e-11	4.06e-06	X	135067201	SLC9A6	TSS1500-shore
cg02161824	LUSC	0.160145	1.17e-16	4.48e-11	X	134186388	FAM127B	TSS200-shore
cg02501924	LUSC	0.173803	1.1e-14	4.2e-09	X	99891813	TSPAN6	TSS200-shore
cg02523105	LUSC	0.194493	8.88e-22	3.39e-16	X	134232832	NCRNA00087	TSS200-island
cg02579620	LUSC	0.140771	1.58e-13	6.05e-08	X	152988658	BCAP31	Body-shore
cg02581727	LUSC	0.116564	6.99e-09	0.00266967	X	134478016	ZNF449	TSS1500-shore
cg02634083	LUSC	0.0920733	1.61e-08	0.00616659	X	150153136	HMGB3	5'UTR-shore
cg02649608	LUSC	0.104332	5.19e-08	0.019828	X	119384792	ZBTB33	5'UTR-island
cg02698615	LUSC	0.122221	4.8e-08	0.0183408	X	135580098	HTATSF1	Body-island
cg02714492	LUSC	0.141893	2.97e-10	0.000113563	X	68836610	EDA	3'UTR-island
cg02732801	LUSC	0.176546	7.42e-11	2.83e-05	X	152066328		IGR-island
cg02791948	LUSC	0.0930804	3.9e-08	0.0148963	X	153236083	HCFC1	Body-island
cg02804166	LUSC	0.112797	2.52e-09	0.000962449	X	133506996	PHF6	TSS1500-shore
cg02940221	LUSC	0.145798	1.43e-22	5.46e-17	X	153536952	TKTL1	Body-opensea
cg03026311	LUSC	0.135133	1.89e-08	0.00722329	X	100075083	CSTF2	TSS1500-shore
cg03035653	LUSC	0.230795	5.39e-08	0.0205989	X	99662932	PCDH19	1stExon-island
cg03040210	LUSC	0.196713	3.64e-22	1.39e-16	X	131624077	MBNL3	TSS200-island
cg03046946	LUSC	0.106459	1.91e-09	0.000728705	X	152735584	HAUS7	Body-shore
cg03122511	LUSC	0.139186	2.32e-12	8.87e-07	X	119077820	NKAP	TSS200-shore
cg03181214	LUSC	0.151926	1.76e-17	6.72e-12	X	100646162	RPL36A	Body-shore
cg03191359	LUSC	0.136643	2.49e-10	9.52e-05	X	38187009	RPGR	TSS1500-island
cg03266942	LUSC	0.118958	8.41e-13	3.21e-07	X	24712207	POLA1	Body-island
cg03267527	LUSC	0.193162	1.18e-22	4.51e-17	X	102510314	TCEAL8	TSS200-opensea
cg03273615	LUSC	0.181288	5.83e-10	0.000222572	X	106362373	RBM41	TSS1500-shore
cg03317455	LUSC	0.147934	6.61e-09	0.00252454	X	43514740	MAOA	TSS1500-island
cg03350932	LUSC	0.152082	1.22e-07	0.0465591	X	153085101	PDZD4	Body-shore
cg03460546	LUSC	0.152625	3.7e-11	1.41e-05	X	128788127	APLN	Body-island
cg03487706	LUSC	0.140711	1.25e-07	0.0478262	X	54666256		IGR-island
cg03558222	LUSC	0.148078	1.13e-07	0.0430656	X	47483257		IGR-island
cg03598440	LUSC	0.239816	7.94e-08	0.0303209	X	99663330	PCDH19	1stExon-island
cg03692134	LUSC	0.105536	9.82e-11	3.75e-05	X	129116990	BCORL1	5'UTR-island
cg03711046	LUSC	0.111455	1.26e-12	4.8e-07	X	48814205	OTUD5	Body-shore
cg03723123	LUSC	0.12974	2.1e-11	8.01e-06	X	55935143		IGR-opensea
cg03732411	LUSC	0.218382	1.93e-18	7.39e-13	X	136134475		IGR-shore
cg03766586	LUSC	0.117614	9.71e-10	0.000370975	X	86772789	KLHL4	1stExon-opensea
cg03787796	LUSC	0.114262	7.44e-12	2.84e-06	X	85302489	CHM	1stExon-opensea
cg03817616	LUSC	0.0868308	9.98e-18	3.81e-12	X	63615495	MTMR8	TSS200-shore
cg03823092	LUSC	0.126982	1.31e-08	0.00498945	X	99891789	TSPAN6	5'UTR-island
cg03842291	LUSC	0.146621	1.21e-07	0.0461519	X	34675964	TMEM47	TSS1500-shore
cg03927113	LUSC	0.149185	1.05e-17	4.03e-12	X	119738603	MCTS1	Body-opensea
cg03946442	LUSC	0.100229	1.27e-07	0.0484795	X	20284665	RPS6KA3	Body-island
cg03992069	LUSC	0.16021	6.48e-15	2.48e-09	X	70474783	ZMYM3	TSS1500-shore
cg04061482	LUSC	0.112049	2.12e-08	0.00811738	X	117629338	DOCK11	TSS1500-island
cg04101819	LUSC	-0.111804	8.11e-08	0.0309869	X	40006699	BCOR	5'UTR-island
cg04238548	LUSC	0.139775	1.12e-10	4.27e-05	X	106045825	TBC1D8B	TSS200-opensea
cg04283377	LUSC	0.0900113	2.34e-09	0.000892703	X	47420348	ARAF	TSS200-shore
cg04302192	LUSC	0.11238	5.42e-17	2.07e-11	X	47341740	ZNF41	5'UTR-shore
cg04455030	LUSC	0.132101	1.32e-12	5.04e-07	X	129402160	ZNF280C	5'UTR-shore
cg04464742	LUSC	0.127693	4.77e-08	0.018209	X	119694953	CUL4B	Body-island
cg04486022	LUSC	0.270087	2.33e-09	0.000889317	X	130207446	FLJ30058	5'UTR-island
cg04493740	LUSC	0.174767	1.25e-16	4.79e-11	X	129474199	SLC25A14	5'UTR-shore
cg04586456	LUSC	0.128706	5.71e-08	0.0218171	X	46696297	RP2	TSS200-island
cg04596655	LUSC	0.143191	1.25e-09	0.000476374	X	128656768	SMARCA1	Body-shore
cg04653083	LUSC	0.177147	3.46e-15	1.32e-09	X	118827004	2024-09-06	Body-island
cg04675170	LUSC	0.148664	3.18e-14	1.22e-08	X	64754950	LAS1L	TSS1500-shore
cg04675306	LUSC	0.148074	7.26e-13	2.77e-07	X	135067450	SLC9A6	TSS200-shore
cg04740028	LUSC	0.17408	1.16e-14	4.45e-09	X	47383436		IGR-island
cg04744025	LUSC	0.069279	1.19e-08	0.00455188	X	146993175	ASFMR1	Body-island
cg04754076	LUSC	0.14096	8.45e-09	0.00322958	X	152599461	ZNF275	TSS200-island
cg04768312	LUSC	0.124269	5.63e-09	0.00215018	X	70337980	MED12	TSS1500-shore
cg04793532	LUSC	0.222429	7.4e-21	2.83e-15	X	107683309	COL4A5	5'UTR-opensea
cg04821091	LUSC	0.170392	2.31e-13	8.82e-08	X	129473898	SLC25A14	TSS200-island
cg04836978	LUSC	0.0804154	1.3e-07	0.0495747	X	72783164	LOC139201	TSS1500-island
cg05059648	LUSC	0.102154	1.16e-08	0.00442311	X	103356954	MCART6	5'UTR-shore
cg05073171	LUSC	0.114522	2.38e-11	9.1e-06	X	134232157	NCRNA00087	Body-shore
cg05074623	LUSC	0.147041	7.23e-20	2.76e-14	X	151999750	NSDHL	5'UTR-island
cg05103731	LUSC	0.119782	6.65e-08	0.0254275	X	153237764	TMEM187	TSS1500-island
cg05127178	LUSC	0.0788177	5.14e-08	0.0196243	X	51636111	MAGED1	TSS1500-shore
cg05130312	LUSC	-0.142486	2.42e-10	9.26e-05	X	130930098	LOC286467	Body-island
cg05134041	LUSC	0.244117	1.09e-07	0.041686	X	82763219	POU3F4	TSS200-shore
cg05143403	LUSC	0.16287	4.81e-22	1.84e-16	X	55744049	RRAGB	TSS200-opensea
cg05204037	LUSC	0.147506	2.74e-08	0.0104819	X	84258754	APOOL	TSS200-opensea
cg05375065	LUSC	0.171876	1.45e-12	5.53e-07	X	62780844	LOC92249	Body-opensea
cg05454424	LUSC	-0.091964	3.6e-13	1.38e-07	X	42637578	PPP1R2P9	TSS200-shore
cg05462236	LUSC	0.198522	1.56e-11	5.96e-06	X	63615456	MTMR8	TSS200-shore
cg05688478	LUSC	0.233376	5.27e-27	2.01e-21	X	128789194	APLN	TSS1500-island
cg05707815	LUSC	0.145621	4.16e-12	1.59e-06	X	71934233	PHKA1	TSS1500-island
cg05740522	LUSC	0.147921	2.29e-15	8.75e-10	X	130036828	ENOX2	5'UTR-island
cg05782651	LUSC	0.130754	4.23e-09	0.00161484	X	109561747	AMMECR1	5'UTR-shore
cg05786601	LUSC	0.135617	3.05e-10	0.000116555	X	66764126	AR	1stExon-shore
cg05803942	LUSC	0.186711	1.28e-09	0.000488852	X	67906758	STARD8	5'UTR-shore
cg05872808	LUSC	0.121286	7.36e-10	0.000281176	X	153657411	ATP6AP1	Body-shore
cg05889642	LUSC	0.120391	9.37e-09	0.00358021	X	133931164	FAM122B	5'UTR-island
cg05906362	LUSC	0.223544	1.02e-08	0.00389001	X	153192754	ARHGAP4	TSS1500-shore
cg05965444	LUSC	0.145078	5.62e-19	2.15e-13	X	134049328	MOSPD1	TSS200-shore
cg06126323	LUSC	0.121135	2.08e-08	0.00795377	X	68836571	EDA	Body-island
cg06234064	LUSC	0.0854118	4.81e-10	0.000183631	X	153584449	FLNA	Body-shore
cg06302218	LUSC	0.11101	3.67e-09	0.00140295	X	102566123	BEX2	TSS200-shore
cg06427226	LUSC	0.14753	1.9e-08	0.00724186	X	105969730	RNF128	TSS200-island
cg06443675	LUSC	0.0950224	1.2e-09	0.000459399	X	103401820	MCART6	TSS200-shore
cg06468442	LUSC	0.128839	1.72e-08	0.00656579	X	106692682		IGR-island
cg06482328	LUSC	0.180641	8.71e-15	3.33e-09	X	119385834	ZBTB33	5'UTR-island
cg06513359	LUSC	0.127772	2.27e-11	8.68e-06	X	47004280	NDUFB11	Body-island
cg06620254	LUSC	0.153733	2.41e-09	0.000921139	X	70503046	NONO	5'UTR-shore
cg06691299	LUSC	0.115809	4.12e-09	0.00157258	X	47077361	CDK16	TSS1500-island
cg06807018	LUSC	0.134486	4.62e-14	1.77e-08	X	119602917	LAMP2	Body-opensea
cg06816704	LUSC	0.163238	1.06e-08	0.00406274	X	152224966	PNMA3	1stExon-shore
cg06818142	LUSC	0.134513	2.6e-12	9.92e-07	X	100603949	TIMM8A	1stExon-island
cg06852103	LUSC	0.118942	7.03e-08	0.0268564	X	48334966	FTSJ1	5'UTR-island
cg06900776	LUSC	0.103796	5.36e-08	0.0204841	X	100878107	ARMCX3	TSS200-opensea
cg06908232	LUSC	0.20058	1.17e-25	4.47e-20	X	128977816	ZDHHC9	TSS1500-island
cg06920429	LUSC	0.0758806	1.24e-10	4.75e-05	X	131353502	RAP2C	TSS1500-shore
cg07053880	LUSC	0.127936	5.27e-11	2.01e-05	X	151143515	GABRE	TSS1500-island
cg07137581	LUSC	0.132182	1.06e-11	4.03e-06	X	63425776	FAM123B	TSS200-island
cg07151929	LUSC	0.0822338	4.77e-08	0.018242	X	30907787	MAP3K7IP3	TSS1500-shore
cg07208231	LUSC	0.135362	1.2e-11	4.58e-06	X	130037545	ENOX2	TSS1500-shore
cg07256221	LUSC	0.135996	2e-13	7.66e-08	X	118533106	SLC25A43	TSS200-shore
cg07363416	LUSC	0.0966591	6.49e-09	0.00247951	X	77151100	MAGT1	TSS200-island
cg07382899	LUSC	0.151971	1.03e-17	3.92e-12	X	128789004	APLN	TSS200-island
cg07647518	LUSC	0.112618	3.66e-12	1.4e-06	X	19904979	SH3KBP1	Body-shore
cg07767690	LUSC	0.108433	2.7e-16	1.03e-10	X	54834292	MAGED2	TSS1500-shore
cg07799491	LUSC	0.13227	1.85e-09	0.00070743	X	149861526	MTMR1	TSS1500-opensea
cg07834773	LUSC	0.122615	1.72e-08	0.00657759	X	50214061	DGKK	TSS1500-shore
cg07869461	LUSC	0.173024	3.59e-16	1.37e-10	X	11777744	MSL3	Body-shore
cg07897414	LUSC	0.117917	1.8e-10	6.88e-05	X	86772895	KLHL4	1stExon-opensea
cg08076508	LUSC	0.114096	6.4e-10	0.000244528	X	54070176	PHF8	5'UTR-shore
cg08087512	LUSC	0.110266	1.45e-09	0.00055419	X	153990886	DKC1	TSS200-island
cg08113756	LUSC	0.134272	9.13e-09	0.00348686	X	57022079	SPIN3	TSS200-shore
cg08222221	LUSC	0.145481	2.08e-08	0.00794739	X	139589617		IGR-shore
cg08222309	LUSC	0.116159	4.18e-15	1.6e-09	X	80457015	SH3BGRL	TSS1500-opensea
cg08239458	LUSC	0.159267	3.7e-17	1.41e-11	X	135579472	HTATSF1	TSS200-island
cg08318837	LUSC	0.223268	2.24e-10	8.56e-05	X	48827880	KCND1	1stExon-shore
cg08349204	LUSC	0.105327	5.6e-11	2.14e-05	X	138287578	FGF13	TSS1500-island
cg08434396	LUSC	0.111197	2.04e-09	0.000778257	X	146993778	ASFMR1	Body-island
cg08435532	LUSC	0.119259	1.65e-11	6.29e-06	X	46405451	ZNF674	TSS1500-shore
cg08437461	LUSC	0.153859	3.37e-19	1.29e-13	X	102611373	WBP5	TSS200-opensea
cg08491357	LUSC	0.142152	1.72e-15	6.56e-10	X	100183974	XKRX	TSS200-island
cg08539065	LUSC	0.107199	1.29e-07	0.049446	X	48957699	WDR45	5'UTR-shore
cg08586423	LUSC	0.291584	6.19e-08	0.0236695	X	102508853	TCEAL8	Body-opensea
cg08587717	LUSC	0.140638	2.9e-13	1.11e-07	X	118709261	UBE2A	Body-shore
cg08610278	LUSC	0.161399	3.6e-08	0.0137412	X	128788071	APLN	Body-island
cg08758558	LUSC	0.0478468	2.99e-09	0.00114394	X	45046434	CXorf36	Body-opensea
cg08791697	LUSC	0.197665	8.12e-14	3.1e-08	X	137794215	FGF13	Body-shore
cg08822676	LUSC	0.204243	1.18e-08	0.00452595	X	118107997	LONRF3	TSS1500-shore
cg08846002	LUSC	0.211089	4.03e-17	1.54e-11	X	134477026	ZNF75D	5'UTR-shore
cg08873063	LUSC	0.127775	2.98e-08	0.0113749	X	153776107	IKBKG	5'UTR-island
cg08991015	LUSC	0.21723	2.02e-25	7.7e-20	X	134049419	MOSPD1	TSS200-shore
cg09060772	LUSC	0.0973578	8.48e-08	0.0324138	X	68723761	FAM155B	TSS1500-island
cg09072865	LUSC	0.129503	1.84e-12	7.02e-07	X	106243506	MORC4	TSS200-island
cg09122412	LUSC	0.142003	1.05e-19	4e-14	X	107683435	COL4A5	1stExon-opensea
cg09163457	LUSC	0.138964	4.29e-08	0.0163788	X	152909014	DUSP9	5'UTR-island
cg09202373	LUSC	0.12402	2.63e-10	0.000100507	X	153640674	DNASE1L1	TSS1500-island
cg09227616	LUSC	0.164399	2.54e-16	9.7e-11	X	49056886	SYP	TSS1500-island
cg09253663	LUSC	0.117676	1.92e-09	0.000734925	X	128788913	APLN	5'UTR-island
cg09284266	LUSC	0.152875	6.48e-10	0.000247574	X	105969630	RNF128	TSS1500-shore
cg09385630	LUSC	0.133182	1.57e-13	5.99e-08	X	37209324	PRRG1	5'UTR-island
cg09513996	LUSC	0.1022	1.69e-09	0.000646913	X	48685182		IGR-island
cg09628099	LUSC	0.211365	9.85e-24	3.77e-18	X	47863193	ZNF182	5'UTR-shore
cg09673206	LUSC	0.092112	4.5e-11	1.72e-05	X	130037332	ENOX2	TSS200-shore
cg09724624	LUSC	0.158419	1.24e-15	4.72e-10	X	107019195	TSC22D3	TSS200-island
cg09735782	LUSC	0.144587	4.45e-09	0.00170027	X	72782845	LOC139201	Body-shore
cg09778422	LUSC	0.233943	3.71e-08	0.0141808	X	64887118	MSN	TSS1500-shore
cg09796544	LUSC	0.264948	4.38e-10	0.000167526	X	152913595	DUSP9	Body-island
cg09867302	LUSC	0.118948	6.59e-08	0.0251624	X	68048137	EFNB1	TSS1500-shore
cg09912841	LUSC	0.131833	1.98e-15	7.57e-10	X	47863665	SPACA5	TSS200-shore
cg09923855	LUSC	0.115517	2.47e-10	9.44e-05	X	135579466	HTATSF1	1stExon-island
cg09946139	LUSC	0.117844	4.21e-09	0.00161042	X	17754979	SCML1	TSS1500-shore
cg09966745	LUSC	0.134308	1.57e-12	5.99e-07	X	71934213	PHKA1	TSS200-island
cg09991056	LUSC	0.161771	1.19e-14	4.56e-09	X	107682966	COL4A5	TSS200-opensea
cg10001949	LUSC	0.127234	1.24e-07	0.0474071	X	134186517	FAM127B	TSS1500-shore
cg10082114	LUSC	0.192147	2.79e-15	1.06e-09	X	77041194	ATRX	Body-island
cg10174816	LUSC	0.135591	1.52e-10	5.82e-05	X	134478126	ZNF449	TSS1500-shore
cg10191725	LUSC	0.347534	1.23e-15	4.69e-10	X	25034625	ARX	TSS1500-island
cg10207070	LUSC	0.0723981	1.12e-10	4.28e-05	X	47005131	RBM10	5'UTR-shore
cg10256662	LUSC	0.113609	1.01e-07	0.0387588	X	133594827	HPRT1	Body-island
cg10273882	LUSC	0.10385	8.99e-08	0.0343504	X	39472958		IGR-island
cg10308137	LUSC	-0.129671	1.04e-09	0.000396623	X	23801074	SAT1	TSS200-island
cg10318351	LUSC	0.129026	1.08e-08	0.00412526	X	54556330	GNL3L	TSS1500-shore
cg10407245	LUSC	0.101384	5.75e-08	0.0219738	X	48595753		IGR-island
cg10443532	LUSC	0.216683	2.56e-11	9.78e-06	X	136657084		IGR-island
cg10446009	LUSC	0.0961381	6.55e-08	0.0250097	X	106871260	PRPS1	TSS1500-shore
cg10536534	LUSC	0.123773	1.24e-07	0.0472956	X	119737767	MCTS1	5'UTR-opensea
cg10607675	LUSC	0.150166	4.06e-08	0.0155007	X	21674415	KLHL34	1stExon-island
cg10646080	LUSC	0.256375	9.37e-11	3.58e-05	X	130191821	FLJ30058	TSS1500-shore
cg10723245	LUSC	0.160792	9.56e-28	3.65e-22	X	103401991	MCART6	TSS1500-shore
cg10857887	LUSC	0.0975334	1.4e-09	0.00053448	X	148622612	LOC100131434	TSS1500-island
cg10869271	LUSC	0.149197	3.56e-13	1.36e-07	X	55934745		IGR-opensea
cg10981178	LUSC	0.122352	3.46e-09	0.00132291	X	119385541	ZBTB33	5'UTR-island
cg10991108	LUSC	0.112209	3.02e-09	0.00115258	X	48958414	WDR45	TSS1500-island
cg11038686	LUSC	0.126251	2.65e-09	0.00101195	X	48595534		IGR-island
cg11072201	LUSC	0.141446	3.1e-11	1.18e-05	X	108976163	ACSL4	5'UTR-island
cg11193681	LUSC	0.108928	2.27e-11	8.67e-06	X	118986581	UPF3B	Body-shore
cg11253356	LUSC	0.137801	2.18e-10	8.31e-05	X	103810926	IL1RAPL2	TSS200-shore
cg11320810	LUSC	0.130326	4.36e-11	1.67e-05	X	117861215	IL13RA1	TSS1500-island
cg11337025	LUSC	0.124425	7.8e-13	2.98e-07	X	106361672	RBM41	Body-island
cg11340371	LUSC	0.132205	6.74e-14	2.58e-08	X	74376241	ABCB7	TSS200-opensea
cg11371160	LUSC	0.105323	3.83e-08	0.0146179	X	153714615	UBL4A	Body-island
cg11395386	LUSC	0.30221	1.35e-14	5.14e-09	X	153360157	MECP2	Body-shelf
cg11395955	LUSC	-0.206736	1.82e-11	6.94e-06	X	23801087	SAT1	TSS200-island
cg11441847	LUSC	0.116479	2.35e-12	9e-07	X	117861165	IL13RA1	TSS1500-shore
cg11550332	LUSC	0.141718	6.8e-11	2.6e-05	X	106960273	TSC22D3	Body-shore
cg11618093	LUSC	0.145928	8.42e-17	3.22e-11	X	152000347	NSDHL	5'UTR-shore
cg11648471	LUSC	0.145742	2.02e-10	7.72e-05	X	14891001	MOSPD2	TSS1500-island
cg11664825	LUSC	0.149265	1.91e-09	0.000728628	X	100184343	XKRX	TSS1500-island
cg11717930	LUSC	0.116767	5.39e-09	0.0020613	X	53111116	TSPYL2	TSS1500-shore
cg11863130	LUSC	0.278143	1.48e-10	5.65e-05	X	25029285	ARX	Body-shore
cg12038981	LUSC	0.140859	4.82e-14	1.84e-08	X	153627594	RPL10	Body-shore
cg12047536	LUSC	0.15993	9.88e-13	3.77e-07	X	119737620	MCTS1	TSS1500-opensea
cg12074916	LUSC	0.109375	1.98e-08	0.00757069	X	47863588	SPACA5	TSS200-island
cg12125741	LUSC	0.150162	1.21e-16	4.64e-11	X	103401380	MCART6	5'UTR-shore
cg12177454	LUSC	0.140604	2.21e-08	0.00846156	X	100877938	ARMCX3	TSS200-opensea
cg12291192	LUSC	0.133707	7.36e-13	2.81e-07	X	48397840	TBC1D25	TSS1500-island
cg12324831	LUSC	0.14438	4.14e-12	1.58e-06	X	154444470	VBP1	TSS1500-opensea
cg12464216	LUSC	0.137981	2.31e-13	8.83e-08	X	102469889	BEX4	TSS200-shore
cg12467288	LUSC	0.141032	1.99e-09	0.000760766	X	135067367	SLC9A6	TSS1500-shore
cg12543132	LUSC	0.15439	3.44e-18	1.31e-12	X	23761732	ACOT9	TSS1500-shore
cg12543338	LUSC	0.147808	6.73e-12	2.57e-06	X	149106022	LOC100272228	TSS1500-shore
cg12687215	LUSC	0.112896	2.09e-08	0.0079729	X	153672898	FAM50A	Body-island
cg12753358	LUSC	0.136226	1.82e-16	6.95e-11	X	68047716	EFNB1	TSS1500-shore
cg12799835	LUSC	0.100158	6.5e-10	0.000248205	X	57313034	FAAH2	TSS200-opensea
cg12858650	LUSC	0.0987459	2.86e-08	0.0109301	X	47039497	RBM10	Body-island
cg12865398	LUSC	0.107913	9.72e-09	0.00371429	X	49056670	SYP	TSS200-island
cg12883250	LUSC	0.127023	9.75e-09	0.00372717	X	148713830	TMEM185A	TSS1500-shore
[truncated: 268 more rows]

## Sheet: GOresults
ONTOLOGY	TERM	N	DE	P.DE	SigGenesInSet	Cancer
BP	RNA splicing, via transesterification reactions	297	8	0.0386824	SMNDC1,SRPK3,RBMX,RBMX2,RBM41,MBNL3,RBM3,RBM10	LIHC
BP	regulation of alternative mRNA splicing, via spliceosome	61	3	0.0497227	RBMX,MBNL3,RBM10	LIHC
BP	negative regulation of histone H3-K36 methylation	1	1	0.0169083	BCOR	LIHC
BP	in utero embryonic development	388	11	0.0165763	PEMT,AR,OCRL,NSDHL,ATP7A,BCOR,THOC2,STIL,WNT7B,E2F8,PHF6,GINS1	LIHC
BP	blastocyst development	114	5	0.0164896	PEMT,BCOR,THOC2,PHF6,GINS1	LIHC
BP	blastocyst hatching	25	3	0.00388557	PEMT,BCOR,PHF6	LIHC
BP	desensitization of G protein-coupled receptor signaling pathway	19	2	0.0233569	UBQLN2,APLN	LIHC
BP	G protein-coupled receptor internalization	13	2	0.0107275	UBQLN2,APLN	LIHC
BP	regulation of receptor internalization	58	3	0.0438147	UBQLN2,ANXA2,APLN	LIHC
BP	negative regulation of receptor internalization	17	2	0.0215332	UBQLN2,ANXA2	LIHC
BP	tRNA nucleoside ribose methylation	1	1	0.0126128	FTSJ1	LIHC
BP	renal water retention	1	1	0.0126283	AVPR2	LIHC
BP	DNA strand elongation involved in DNA replication	15	2	0.0157312	POLA1,GINS1	LIHC
BP	mRNA processing	461	11	0.0367909	SMNDC1,ADARB2,SRPK3,RBMX,NONO,RBMX2,RBM41,MBNL3,THOC2,RBM3,RBM10,FAM50A	LIHC
BP	protein monoubiquitination	84	4	0.0263902	HUWE1,FANCB,UHRF1,BCOR,ZC4H2	LIHC
BP	cellular biogenic amine metabolic process	94	4	0.0334184	ALDH2,MAOB,MECP2,ATP7A	LIHC
BP	catecholamine metabolic process	53	3	0.034345	ALDH2,MAOB,ATP7A	LIHC
BP	protein targeting to membrane	121	5	0.0209892	CHM,ZDHHC15,GDI1,ZDHHC9,UBL4A	LIHC
BP	cellular copper ion homeostasis	16	2	0.0167989	CCDC22,ATP7A	LIHC
BP	endocytosis	571	14	0.0195351	CLCN5,LDLRAD3,ARHGAP27,GPC3,SSC5D,SNX12,UBQLN2,ANXA2,LRP5,SORL1,SYP,CUBN,APLN,FCHSD2	LIHC
BP	receptor-mediated endocytosis	251	8	0.0183544	LDLRAD3,ARHGAP27,UBQLN2,ANXA2,SORL1,CUBN,APLN,FCHSD2	LIHC
BP	spindle organization	194	7	0.0137252	CENPE,STAG2,FLNA,KIF4A,MECP2,ATRX,STIL,AURKB	LIHC
BP	mitotic spindle organization	132	6	0.00767714	CENPE,STAG2,FLNA,KIF4A,MECP2,STIL,AURKB	LIHC
BP	mitotic chromosome movement towards spindle pole	4	1	0.0489189	CENPE	LIHC
BP	I-kappaB kinase/NF-kappaB signaling	282	9	0.011406	PRDX4,MID2,EDA,FLNA,TAB3,CCDC22,AVPR2,TSPAN6,IKBKG	LIHC
BP	synapse assembly	180	6	0.0375026	SDK1,FGF13,ARHGEF9,IL1RAPL2,MECP2,SLITRK2	LIHC
BP	RNA splicing	427	11	0.0229216	SMNDC1,SRPK3,RBMX,HNRNPH2,NONO,RBMX2,RBM41,MBNL3,THOC2,RBM3,RBM10,FAM50A	LIHC
BP	attachment of spindle microtubules to kinetochore	43	3	0.0189717	CENPE,KNL1,AURKB	LIHC
BP	cobalamin metabolic process	13	2	0.012283	MMAB,CUBN	LIHC
BP	catechol-containing compound metabolic process	53	3	0.034345	ALDH2,MAOB,ATP7A	LIHC
BP	response to iron(III) ion	4	2	0.00106435	G6PD,ATP7A	LIHC
BP	response to manganese ion	21	2	0.0275031	ATP7A,D2HGDH	LIHC
BP	regulation of G2/M transition of mitotic cell cycle	98	4	0.0412118	FHL1,GPR132,MECP2,AURKB	LIHC
BP	negative regulation of glycoprotein biosynthetic process	23	2	0.0259206	BACE2,ITM2A	LIHC
BP	protein glutathionylation	2	1	0.0252848	G6PD	LIHC
BP	regulation of protein glutathionylation	2	1	0.0252848	G6PD	LIHC
BP	negative regulation of protein glutathionylation	2	1	0.0252848	G6PD	LIHC
BP	negative regulation of G2/M transition of mitotic cell cycle	63	3	0.048611	FHL1,GPR132,AURKB	LIHC
BP	regulation of skeletal muscle contraction by regulation of release of sequestered calcium ion	4	1	0.0481552	DMD	LIHC
BP	synaptic vesicle maturation	12	2	0.0102527	ZDHHC15,SYP	LIHC
BP	establishment or maintenance of polarity of embryonic epithelium	2	1	0.0295219	WNT7B	LIHC
BP	histone modification	466	11	0.0489683	HUWE1,MSL3,JDP2,PHF8,UHRF1,MECP2,NAP1L2,ATRX,BCOR,OGT,AURKB,MORF4L2	LIHC
BP	protein-heme linkage	1	1	0.0131504	HCCS	LIHC
BP	protein-tetrapyrrole linkage	1	1	0.0131504	HCCS	LIHC
BP	cytochrome c-heme linkage	1	1	0.0131504	HCCS	LIHC
BP	protein polyglycylation	3	1	0.0441262	TTLL10	LIHC
BP	peptidyl-cysteine modification	49	3	0.0266518	ZDHHC15,DMD,ZDHHC9	LIHC
BP	peptidyl-L-cysteine S-palmitoylation	23	2	0.0351757	ZDHHC15,ZDHHC9	LIHC
BP	peptidyl-S-diacylglycerol-L-cysteine biosynthetic process from peptidyl-cysteine	23	2	0.0351757	ZDHHC15,ZDHHC9	LIHC
BP	somatic sex determination	2	1	0.0293082	AR	LIHC
BP	male somatic sex determination	1	1	0.0162092	AR	LIHC
BP	pentose biosynthetic process	2	1	0.0258904	G6PD	LIHC
BP	embryonic olfactory bulb interneuron precursor migration	1	1	0.016103	ARX	LIHC
BP	negative adaptation of signaling pathway	19	2	0.0233569	UBQLN2,APLN	LIHC
BP	adaptation of signaling pathway	21	2	0.0274263	UBQLN2,APLN	LIHC
BP	mammary gland development	134	6	0.0111587	AR,LRP5,PGR,ATP7A,WNT7B,APLN	LIHC
BP	response to cobalt ion	10	2	0.00810176	ATP7A,D2HGDH	LIHC
BP	negative regulation of intracellular transport	59	3	0.0395389	GDI1,SIAH3,SNX12	LIHC
BP	negative regulation of cytokinesis	7	2	0.00368767	E2F8,AURKB	LIHC
BP	regulation of tyrosinase activity	2	1	0.0254696	ATP7A	LIHC
BP	positive regulation of tyrosinase activity	2	1	0.0254696	ATP7A	LIHC
BP	negative regulation of low-density lipoprotein particle receptor catabolic process	2	1	0.0274086	ANXA2	LIHC
BP	regulation of DNA endoreduplication	3	1	0.0381177	E2F8	LIHC
BP	positive regulation of DNA endoreduplication	2	1	0.0258219	E2F8	LIHC
BP	tetrapyrrole metabolic process	63	3	0.0437713	ABCB7,MMAB,CUBN	LIHC
BP	positive regulation of neutrophil apoptotic process	4	1	0.0430298	PIK3CD	LIHC
BP	nuclear DNA replication	38	3	0.0132836	POLA1,ATRX,GINS1	LIHC
BP	cell cycle comprising mitosis without cytokinesis	1	1	0.012378	E2F8	LIHC
BP	negative regulation of maintenance of sister chromatid cohesion	3	1	0.0397109	ATRX	LIHC
BP	negative regulation of maintenance of mitotic sister chromatid cohesion	3	1	0.0397109	ATRX	LIHC
BP	protein localization to kinetochore	18	2	0.0217332	KNL1,AURKB	LIHC
BP	iron ion transmembrane transport	21	2	0.0290635	ABCB7,ATP7A	LIHC
BP	negative regulation of iron ion transport	3	1	0.0371905	ATP7A	LIHC
BP	negative regulation of iron ion transmembrane transport	3	1	0.0371905	ATP7A	LIHC
BP	post-embryonic appendage morphogenesis	1	1	0.0142726	ATRX	LIHC
BP	post-embryonic limb morphogenesis	1	1	0.0142726	ATRX	LIHC
BP	post-embryonic forelimb morphogenesis	1	1	0.0142726	ATRX	LIHC
BP	hatching	25	3	0.00388557	PEMT,BCOR,PHF6	LIHC
BP	NAD transmembrane transport	4	1	0.0456463	SLC25A53	LIHC
BP	protein localization to microtubule	19	2	0.0267472	MID2,MID1	LIHC
BP	histone H4-K20 demethylation	3	1	0.0378727	PHF8	LIHC
BP	insulin secretion involved in cellular response to glucose stimulus	59	3	0.0446533	LRP5,CDK16,PTPRN2	LIHC
BP	phosphatidylinositol-3-phosphate biosynthetic process	21	2	0.0316038	OCRL,PIK3CD	LIHC
BP	histone H3-K9 trimethylation	17	2	0.01983	MECP2,ATRX	LIHC
BP	insulin receptor recycling	1	1	0.0161809	SORL1	LIHC
BP	regulation of dopamine metabolic process	20	2	0.0313323	ALDH2,MAOB	LIHC
BP	regulation of catecholamine metabolic process	20	2	0.0313323	ALDH2,MAOB	LIHC
BP	cell migration involved in gastrulation	14	2	0.0152293	GPC3,LRP5	LIHC
BP	regulation of protein catabolic process	356	9	0.0475023	ASB9,FLNA,GPC3,SNX12,UBQLN2,ANXA2,ARAF,SORL1,RNF128,OGT	LIHC
BP	epinephrine metabolic process	3	1	0.0402948	ATP7A	LIHC
BP	dopamine metabolic process	39	3	0.0164596	ALDH2,MAOB,ATP7A	LIHC
BP	serotonin metabolic process	11	2	0.00908595	ALDH2,ATP7A	LIHC
BP	indole-containing compound metabolic process	23	2	0.0328429	ALDH2,ATP7A	LIHC
BP	amyloid precursor protein biosynthetic process	26	2	0.0350776	BACE2,ITM2A	LIHC
BP	regulation of amyloid precursor protein biosynthetic process	26	2	0.0350776	BACE2,ITM2A	LIHC
BP	negative regulation of amyloid precursor protein biosynthetic process	19	2	0.0168651	BACE2,ITM2A	LIHC
BP	regulation of I-kappaB kinase/NF-kappaB signaling	250	7	0.0441675	MID2,EDA,FLNA,TAB3,CCDC22,TSPAN6,IKBKG	LIHC
BP	positive regulation of I-kappaB kinase/NF-kappaB signaling	187	7	0.0108765	MID2,EDA,FLNA,TAB3,CCDC22,TSPAN6,IKBKG	LIHC
BP	regulation of RNA splicing	175	6	0.0290234	RBMX,HNRNPH2,MBNL3,RBM3,RBM10,FAM50A	LIHC
BP	histone H2A acetylation	23	2	0.0356266	MSL3,MORF4L2	LIHC
BP	cellular amine metabolic process	105	4	0.0469229	ALDH2,MAOB,MECP2,ATP7A	LIHC
BP	protein localization to cytoskeleton	58	3	0.0450099	MID2,MID1,STIL	LIHC
BP	glial cell-derived neurotrophic factor production	3	1	0.0420885	SORL1	LIHC
BP	cell cycle DNA replication	42	4	0.00216417	POLA1,ATRX,E2F8,GINS1	LIHC
BP	establishment or maintenance of neuroblast polarity	3	1	0.0417494	FGF13	LIHC
BP	establishment of neuroblast polarity	3	1	0.0417494	FGF13	LIHC
BP	negative regulation of integrin biosynthetic process	2	1	0.0284176	AR	LIHC
BP	positive regulation of integrin biosynthetic process	3	1	0.0387216	AR	LIHC
BP	negative regulation of mRNA splicing, via spliceosome	23	2	0.0374516	RBMX,RBM10	LIHC
BP	positive regulation of mRNA splicing, via spliceosome	25	2	0.0382962	RBMX,RBM3	LIHC
BP	male genitalia morphogenesis	4	1	0.0479289	AR	LIHC
BP	diencephalon morphogenesis	3	1	0.0466607	OTX1	LIHC
BP	regulation of epithelial cell proliferation	403	10	0.0379945	ARX,GPC3,UHRF1,AR,MIR98,PGR,PIK3CD,PLXNB3,ATP7A,WDR13,APLN	LIHC
BP	regulation of mRNA processing	137	5	0.035469	SRPK3,RBMX,MBNL3,RBM3,RBM10	LIHC
BP	negative regulation of mRNA processing	25	2	0.0437049	RBMX,RBM10	LIHC
BP	synapse organization	425	12	0.0147976	ZDHHC15,SDK1,FGF13,FLNA,ARHGEF9,IL1RAPL2,MECP2,PAK3,ZC4H2,SYN1,WNT7B,SLITRK2	LIHC
BP	positive regulation of DNA metabolic process	296	8	0.0440215	FANCB,MECP2,PAK3,ATRX,SMARCD1,E2F8,AURKB,MORF4L2,GINS1	LIHC
BP	negative regulation of cellular component organization	696	15	0.0464014	HUWE1,FGF13,PHF8,FLNA,GDI1,TMSB15B,UBQLN2,ANXA2,AR,ARHGAP6,MIR98,MID1,PLXNB3,ATRX,THOC2,SORL1,AURKB	LIHC
BP	regulation of nitrogen compound metabolic process	5488	84	0.0469218	HUWE1,CENPE,MSL3,MID2,KLF8,JDP2,HDX,SPIN4,ASB9,LDLRAD3,ZXDB,SPIN3,ARX,DLG3,DMD,EDA,ZNF449,ALDH2,FANCB,ABCB7,FGF13,PHF8,FLNA,ATP1B4,G6PD,BACE2,SRPK3,GLA,GPC3,RBMX,CCDC22,KLF15,UHRF1,GTF2F2,SNX12,UBQLN2,ANXA2,HNRNPH2,ZNF81,AR,ARAF,KPNA1,LRP5,MIR98,MAOB,MECP2,NAP1L2,NONO,OTX1,PAK3,CDK16,ARMCX3,PGR,ATRX,BCOR,RADX,ZNF280C,MBNL3,WWC3,ZC4H2,NKRF,MOSPD1,EBF4,PZP,RBM3,TSPYL2,ZNF674,UPF3B,SMARCD1,SORL1,TFE…	LIHC
BP	positive regulation of sulfur metabolic process	3	1	0.0408867	ABCB7	LIHC
BP	cytoplasmic sequestering of protein	22	2	0.0337456	FLNA,CCDC22	LIHC
BP	attachment of mitotic spindle microtubules to kinetochore	21	2	0.029963	CENPE,AURKB	LIHC
BP	elastin biosynthetic process	2	1	0.0250514	ATP7A	LIHC
BP	regulation of histone H3-K9 methylation	26	2	0.0484901	MECP2,ATRX	LIHC
BP	negative regulation of cell division	17	2	0.0210253	E2F8,AURKB	LIHC
BP	copper ion homeostasis	19	2	0.0236086	CCDC22,ATP7A	LIHC
BP	copper ion export	2	1	0.0244786	ATP7A	LIHC
BP	apelin receptor signaling pathway	2	1	0.0253854	APLN	LIHC
BP	trachea development	19	2	0.0295423	EDA,WNT7B	LIHC
BP	mammary gland morphogenesis	45	3	0.0264343	AR,LRP5,PGR	LIHC
BP	branching involved in mammary gland duct morphogenesis	22	3	0.00365996	AR,LRP5,PGR	LIHC
BP	prostate induction	1	1	0.0162092	AR	LIHC
BP	prostate field specification	1	1	0.0162092	AR	LIHC
BP	activation of prostate induction by androgen receptor signaling pathway	1	1	0.0162092	AR	LIHC
BP	trachea cartilage morphogenesis	3	1	0.0454177	WNT7B	LIHC
BP	lateral sprouting involved in mammary gland duct morphogenesis	2	1	0.0324822	AR	LIHC
BP	mammary gland duct morphogenesis	30	3	0.0092158	AR,LRP5,PGR	LIHC
BP	mammary gland branching involved in pregnancy	7	2	0.00426888	AR,PGR	LIHC
BP	tertiary branching involved in mammary gland duct morphogenesis	3	2	0.000639914	AR,PGR	LIHC
BP	cell-cell signaling involved in mammary gland development	2	1	0.0331658	LRP5	LIHC
BP	positive regulation of epithelial cell proliferation involved in prostate gland development	3	1	0.0455311	AR	LIHC
BP	trachea submucosa development	2	1	0.0251777	EDA	LIHC
BP	trachea gland development	2	1	0.0251777	EDA	LIHC
BP	mammary gland epithelium development	68	4	0.0164821	AR,LRP5,PGR,WNT7B	LIHC
BP	regulation of rDNA heterochromatin formation	2	1	0.0240563	PHF8	LIHC
BP	negative regulation of ribosomal DNA heterochromatin formation	2	1	0.0240563	PHF8	LIHC
BP	histone H3-K9 modification	47	3	0.0251987	MECP2,NAP1L2,ATRX	LIHC
BP	negative regulation of tooth mineralization	2	1	0.0255309	BCOR	LIHC
BP	positive regulation of heme biosynthetic process	3	1	0.0378278	ABCB7	LIHC
BP	cellular response to lead ion	4	1	0.0471177	ATP7A	LIHC
BP	organism emergence from protective structure	25	3	0.00388557	PEMT,BCOR,PHF6	LIHC
BP	renal inner medulla development	2	1	0.0291599	WNT7B	LIHC
BP	renal outer medulla development	2	1	0.0291599	WNT7B	LIHC
BP	outer medullary collecting duct development	1	1	0.0155273	WNT7B	LIHC
BP	inner medullary collecting duct development	2	1	0.0289436	WNT7B	LIHC
BP	mesenchymal cell proliferation involved in ureteric bud development	3	1	0.0405318	GPC3	LIHC
BP	seminiferous tubule development	15	2	0.0162518	AR,ATRX	LIHC
BP	neutrophil extravasation	12	2	0.00987442	PIK3CD,CD99L2	LIHC
BP	protein localization to microtubule cytoskeleton	54	3	0.0372248	MID2,MID1,STIL	LIHC
BP	regulation of DNA-templated DNA replication	56	3	0.0349206	ATRX,E2F8,GINS1	LIHC
BP	male anatomical structure morphogenesis	4	1	0.0479289	AR	LIHC
BP	ammonium ion metabolic process	23	2	0.0319514	ALDH2,ATP7A	LIHC
BP	telomeric repeat-containing RNA transcription	1	1	0.0142726	ATRX	LIHC
BP	telomeric repeat-containing RNA transcription by RNA polymerase II	1	1	0.0142726	ATRX	LIHC
BP	L-lysine import across plasma membrane	2	1	0.0254052	SLC7A3	LIHC
BP	L-ornithine import across plasma membrane	1	1	0.0135315	SLC7A3	LIHC
BP	vesicle-mediated transport between endosomal compartments	45	3	0.0214099	FLNA,SNX12,SORL1	LIHC
BP	trans-synaptic signaling by BDNF	4	1	0.0461112	MECP2	LIHC
BP	maintenance of mitotic sister chromatid cohesion, telomeric	2	1	0.026576	ATRX	LIHC
BP	mitotic sister chromatid cohesion, telomeric	2	1	0.026576	ATRX	LIHC
BP	microtubule plus-end directed mitotic chromosome migration	1	1	0.0124728	CENPE	LIHC
BP	lateral attachment of mitotic spindle microtubules to kinetochore	2	2	0.000168956	CENPE,AURKB	LIHC
BP	Norrin signaling pathway	3	1	0.0414551	LRP5	LIHC
BP	protein targeting to Golgi apparatus	1	1	0.0120151	ZDHHC15	LIHC
BP	iron-sulfur cluster export from the mitochondrion	1	1	0.0120576	ABCB7	LIHC
BP	regulation of histone H3-K9 trimethylation	12	2	0.0102522	MECP2,ATRX	LIHC
BP	regulation of glial cell-derived neurotrophic factor production	3	1	0.0420885	SORL1	LIHC
BP	positive regulation of glial cell-derived neurotrophic factor production	3	1	0.0420885	SORL1	LIHC
BP	negative regulation of clathrin-dependent endocytosis	4	1	0.0472449	UBQLN2	LIHC
BP	primary amino compound metabolic process	14	2	0.0147109	ALDH2,ATP7A	LIHC
BP	positive regulation of tetrapyrrole biosynthetic process	3	1	0.0378278	ABCB7	LIHC
BP	regulation of telomeric RNA transcription from RNA pol II promoter	1	1	0.0142726	ATRX	LIHC
BP	negative regulation of telomeric RNA transcription from RNA pol II promoter	1	1	0.0142726	ATRX	LIHC
BP	positive regulation of telomeric RNA transcription from RNA pol II promoter	1	1	0.0142726	ATRX	LIHC
BP	DNA strand elongation involved in cell cycle DNA replication	1	1	0.0131128	GINS1	LIHC
BP	DNA strand elongation involved in nuclear cell cycle DNA replication	1	1	0.0131128	GINS1	LIHC
BP	iron-sulfur cluster transmembrane transport	1	1	0.0120576	ABCB7	LIHC
BP	proton transmembrane transport	149	5	0.0431696	SLC9A6,CLCN4,CLCN5,COX7B,ATP7A	LIHC
BP	regulation of choline O-acetyltransferase activity	1	1	0.0161809	SORL1	LIHC
BP	positive regulation of choline O-acetyltransferase activity	1	1	0.0161809	SORL1	LIHC
BP	microtubule cytoskeleton organization involved in mitosis	162	6	0.0200662	CENPE,STAG2,FLNA,KIF4A,MECP2,STIL,AURKB	LIHC
BP	regulation of early endosome to recycling endosome transport	2	1	0.0287922	SORL1	LIHC
BP	positive regulation of early endosome to recycling endosome transport	1	1	0.0161809	SORL1	LIHC
BP	negative regulation of aspartic-type endopeptidase activity involved in amyloid precursor protein catabolic process	3	1	0.0452318	SORL1	LIHC
BP	regulation of metalloendopeptidase activity involved in amyloid precursor protein catabolic process	2	1	0.0301923	SORL1	LIHC
BP	negative regulation of metalloendopeptidase activity involved in amyloid precursor protein catabolic process	2	1	0.0301923	SORL1	LIHC
BP	mitotic DNA replication	14	2	0.0143432	POLA1,GINS1	LIHC
BP	DNA strand elongation involved in mitotic DNA replication	1	1	0.0131128	GINS1	LIHC
BP	neurofibrillary tangle assembly	3	1	0.0478615	SORL1	LIHC
BP	regulation of neurofibrillary tangle assembly	2	1	0.0317314	SORL1	LIHC
BP	negative regulation of neurofibrillary tangle assembly	1	1	0.0161809	SORL1	LIHC
BP	negative regulation of glycoprotein metabolic process	26	2	0.0318022	BACE2,ITM2A	LIHC
BP	protein localization to condensed chromosome	18	2	0.0217332	KNL1,AURKB	LIHC
BP	regulation of dopamine biosynthetic process	3	1	0.0362355	ALDH2	LIHC
BP	regulation of iron-sulfur cluster assembly	1	1	0.0120576	ABCB7	LIHC
BP	positive regulation of iron-sulfur cluster assembly	1	1	0.0120576	ABCB7	LIHC
BP	negative regulation of cytoplasmic transport	3	1	0.0381722	SNX12	LIHC
BP	regulation of G protein-coupled receptor internalization	3	2	0.00045554	UBQLN2,APLN	LIHC
BP	negative regulation of G protein-coupled receptor internalization	2	1	0.0245184	UBQLN2	LIHC
BP	positive regulation of G protein-coupled receptor internalization	1	1	0.0125257	APLN	LIHC
BP	negative regulation of type B pancreatic cell proliferation	3	1	0.037352	WDR13	LIHC
BP	positive regulation of calcium ion transmembrane transport via high voltage-gated calcium channel	3	1	0.0383386	G6PD	LIHC
BP	regulation of maintenance of mitotic sister chromatid cohesion, telomeric	2	1	0.026576	ATRX	LIHC
BP	negative regulation of maintenance of mitotic sister chromatid cohesion, telomeric	2	1	0.026576	ATRX	LIHC
BP	regulation of membrane repolarization during atrial cardiac muscle cell action potential	2	1	0.0246574	FLNA	LIHC
BP	regulation of lateral attachment of mitotic spindle microtubules to kinetochore	1	1	0.0135762	AURKB	LIHC
BP	positive regulation of lateral attachment of mitotic spindle microtubules to kinetochore	1	1	0.0135762	AURKB	LIHC
BP	positive regulation of low-density lipoprotein particle clearance	3	1	0.0373433	ANXA2	LIHC
BP	regulation of low-density lipoprotein particle receptor binding	3	1	0.038124	ANXA2	LIHC
BP	positive regulation of low-density lipoprotein particle receptor binding	1	1	0.0136881	ANXA2	LIHC
BP	positive regulation of receptor-mediated endocytosis involved in cholesterol transport	2	1	0.0271785	ANXA2	LIHC
BP	regulation of serotonin biosynthetic process	1	1	0.0124428	ALDH2	LIHC
BP	positive regulation of plasma membrane repair	3	1	0.0427299	ANXA2	LIHC
BP	negative regulation of germ cell proliferation	4	1	0.0474206	PRDX4	LIHC
BP	positive regulation of DNA-templated DNA replication	14	2	0.0140257	ATRX,E2F8	LIHC
BP	negative regulation of male germ cell proliferation	4	1	0.0474206	PRDX4	LIHC
BP	positive regulation of T cell extravasation	3	1	0.0340901	CD99L2	LIHC
BP	regulation of opioid receptor signaling pathway	3	1	0.0377707	SYP	LIHC
BP	negative regulation of early endosome to late endosome transport	2	1	0.027328	SNX12	LIHC
BP	negative regulation of receptor catabolic process	3	1	0.0411258	ANXA2	LIHC
BP	negative regulation of transcription from RNA polymerase II promoter involved in smooth muscle cell differentiation	3	1	0.0378809	MECP2	LIHC
BP	positive regulation of T cell activation via T cell receptor contact with antigen bound to MHC molecule on antigen presenting cell	3	1	0.0411476	HLA-DMB	LIHC
BP	assembly of actomyosin apparatus involved in cytokinesis	6	1	0.0139943	PLEC	LUAD
BP	actomyosin contractile ring assembly	6	1	0.0139943	PLEC	LUAD
BP	neural plate development	9	1	0.0253015	ZIC3	LUAD
BP	liver development	141	2	0.0453627	IGF2R,ZIC3	LUAD
BP	nervous system process involved in regulation of systemic arterial blood pressure	13	1	0.0324626	MECP2	LUAD
BP	regulation of respiratory gaseous exchange by nervous system process	12	2	0.000504528	MECP2,NLGN3	LUAD
BP	cap-dependent translational initiation	7	1	0.0172935	SLBP	LUAD
BP	leukocyte migration involved in immune response	3	1	0.00557497	PLEC	LUAD
BP	respiratory system process	39	2	0.00491688	MECP2,NLGN3	LUAD
BP	keratinocyte development	13	1	0.0300332	PLEC	LUAD
BP	inositol metabolic process	11	1	0.0215745	MECP2	LUAD
BP	regulation of gene expression by genomic imprinting	17	1	0.0432491	MECP2	LUAD
BP	mRNA 3'-end processing by stem-loop binding and cleavage	6	1	0.0129938	SLBP	LUAD
BP	protein dephosphorylation	254	3	0.0254901	PTPMT1,PPP2R5A,PPP1R2C	LUAD
BP	protein acetylation	221	3	0.0179035	DR1,MECP2,NAA40	LUAD
BP	N-terminal protein amino acid acetylation	17	1	0.0425875	NAA40	LUAD
BP	internal protein amino acid acetylation	183	3	0.0108439	DR1,MECP2,NAA40	LUAD
BP	phosphatidylglycerol biosynthetic process	10	1	0.0254694	PTPMT1	LUAD
BP	phosphorus metabolic process	2722	12	0.0258766	PTPMT1,DLG3,MECP2,PGM1,PLEC,PPP2R5A,PRKAB1,MAPK13,RAP2B,CEP85,TEC,PPP1R2C	LUAD
BP	phosphate-containing compound metabolic process	2696	12	0.0241619	PTPMT1,DLG3,MECP2,PGM1,PLEC,PPP2R5A,PRKAB1,MAPK13,RAP2B,CEP85,TEC,PPP1R2C	LUAD
BP	lysosomal transport	125	2	0.0394977	IGF2R,HOOK1	LUAD
BP	centrosome cycle	133	2	0.0421541	CEP85,PARD6B	LUAD
BP	mitotic centrosome separation	14	1	0.0323832	CEP85	LUAD
BP	neuron cell-cell adhesion	15	1	0.043639	NLGN3	LUAD
BP	integrin-mediated signaling pathway	113	2	0.0356766	ITGB5,TEC	LUAD
BP	multicellular organism development	4792	18	0.0289217	CDX4,SEMA4B,ARX,DLG3,DR1,IGF2R,ITGB5,MECP2,NUMA1,PLEC,NLGN3,POU3F4,PRKAB1,PCDH19,TFE3,ZIC3,PARD6B,ALKBH1,CABLES1	LUAD
BP	axonogenesis	436	4	0.0329837	SEMA4B,ARX,NLGN3,PARD6B	LUAD
BP	brain development	745	5	0.0475783	ARX,MECP2,POU3F4,PCDH19,ZIC3	LUAD
BP	respiratory gaseous exchange by respiratory system	74	2	0.0138832	MECP2,NLGN3	LUAD
BP	histone mRNA metabolic process	20	1	0.0453257	SLBP	LUAD
BP	response to water	13	1	0.0352727	PLEC	LUAD
BP	post-embryonic development	91	2	0.0227086	IGF2R,MECP2	LUAD
BP	axis specification	95	2	0.0247763	CDX4,ZIC3	LUAD
BP	anterior/posterior axis specification	57	2	0.00887386	CDX4,ZIC3	LUAD
BP	T cell chemotaxis	24	1	0.041514	PLEC	LUAD
BP	regulation of microtubule nucleation	11	1	0.0294791	MECP2	LUAD
BP	striated muscle tissue development	255	3	0.026302	PLEC,MRTFB,ZIC3	LUAD
BP	skeletal myofibril assembly	9	1	0.024211	PLEC	LUAD
BP	regulation of striated muscle tissue development	17	1	0.0457817	MRTFB	LUAD
BP	phosphorylation	1781	9	0.0288107	DLG3,PGM1,PLEC,PPP2R5A,PRKAB1,MAPK13,RAP2B,CEP85,TEC	LUAD
BP	histone acetylation	176	3	0.00988223	DR1,MECP2,NAA40	LUAD
BP	respiratory chain complex III assembly	10	1	0.0227396	STMP1	LUAD
BP	peptidyl-amino acid modification	1234	7	0.0310948	DLG3,DR1,MECP2,MAPK13,RAP2B,TEC,NAA40	LUAD
BP	internal peptidyl-lysine acetylation	181	3	0.010533	DR1,MECP2,NAA40	LUAD
BP	peptidyl-lysine acetylation	192	3	0.0123654	DR1,MECP2,NAA40	LUAD
BP	proprioception	5	1	0.0132299	MECP2	LUAD
BP	globus pallidus development	4	1	0.0121819	ARX	LUAD
BP	olfactory bulb development	33	2	0.00353737	ARX,ZIC3	LUAD
BP	cerebral cortex tangential migration	6	1	0.0171822	ARX	LUAD
BP	substrate-independent telencephalic tangential migration	9	1	0.0260342	ARX	LUAD
BP	interneuron migration from the subpallium to the cortex	9	1	0.0260342	ARX	LUAD
BP	embryonic olfactory bulb interneuron precursor migration	1	1	0.00314453	ARX	LUAD
BP	substrate-independent telencephalic tangential interneuron migration	9	1	0.0260342	ARX	LUAD
BP	cerebral cortex GABAergic interneuron migration	6	1	0.0178201	ARX	LUAD
BP	olfactory bulb interneuron differentiation	11	1	0.0307068	ARX	LUAD
BP	olfactory bulb interneuron development	6	1	0.0165051	ARX	LUAD
BP	cerebral cortex GABAergic interneuron differentiation	11	1	0.0311457	ARX	LUAD
BP	cerebral cortex GABAergic interneuron development	7	1	0.0192076	ARX	LUAD
BP	olfactory lobe development	35	2	0.00395427	ARX,ZIC3	LUAD
BP	tangential migration from the subventricular zone to the olfactory bulb	6	1	0.0165153	ARX	LUAD
BP	platelet activation	133	2	0.0410895	RAP2B,TEC	LUAD
BP	germ-line stem cell population maintenance	4	1	0.0110669	ZIC3	LUAD
BP	regulation of protein modification process	1519	8	0.0295013	DLG3,DR1,MECP2,PLEC,PPP2R5A,RAP2B,CEP85,PPP1R2C	LUAD
BP	hemidesmosome assembly	6	1	0.0172296	PLEC	LUAD
BP	cardiolipin metabolic process	17	2	0.000725857	PTPMT1,MECP2	LUAD
BP	cardiolipin biosynthetic process	8	1	0.0217818	PTPMT1	LUAD
BP	peripheral nervous system myelin maintenance	9	1	0.0265456	PLEC	LUAD
BP	Rap protein signal transduction	13	1	0.0323064	RAP2B	LUAD
BP	multicellular organismal process	7263	25	0.00701053	CDX4,SEMA4B,ARX,DLG3,DR1,IGF2R,ITGB5,MECP2,NUMA1,HOOK1,PLEC,NLGN3,POU3F4,PRKAB1,MAPK13,MRTFB,PCDH19,RAP2B,HERPUD2,STMP1,TEC,TFE3,ZIC3,SLIRP,PARD6B,ALKBH1,CABLES1	LUAD
BP	developmental process	6290	22	0.0230519	CDX4,SEMA4B,ARX,DLG3,DR1,IGF2R,ITGB5,MECP2,NUMA1,HOOK1,PLEC,NLGN3,POU3F4,PRKAB1,MRTFB,PCDH19,HERPUD2,TEC,TFE3,ZIC3,SLIRP,PARD6B,ALKBH1,CABLES1	LUAD
BP	cell part morphogenesis	659	5	0.0341508	SEMA4B,ARX,PLEC,NLGN3,SLIRP,PARD6B	LUAD
BP	mitochondrial cytochrome c oxidase assembly	23	1	0.0478598	STMP1	LUAD
BP	negative regulation of kinase activity	233	3	0.0195849	PLEC,PPP2R5A,CEP85	LUAD
BP	cell junction assembly	422	4	0.0242394	MECP2,PLEC,NLGN3,PARD6B	LUAD
BP	mitochondrial respiratory chain complex III assembly	10	1	0.0227396	STMP1	LUAD
BP	social behavior	51	2	0.00850419	MECP2,NLGN3	LUAD
BP	central nervous system segmentation	4	1	0.0123003	ZIC3	LUAD
BP	regulation of dephosphorylation	129	2	0.0399553	PPP2R5A,PPP1R2C	LUAD
BP	regulation of protein dephosphorylation	92	2	0.0225631	PPP2R5A,PPP1R2C	LUAD
BP	determination of pancreatic left/right asymmetry	5	1	0.0116396	ZIC3	LUAD
BP	determination of left/right asymmetry in nervous system	2	1	0.00599946	ZIC3	LUAD
BP	ceramide transport	17	1	0.0369223	GLTPD2	LUAD
BP	nail development	10	1	0.0247947	PRKAB1	LUAD
BP	histone H3-K9 trimethylation	17	1	0.0398844	MECP2	LUAD
BP	ear morphogenesis	123	2	0.0442045	POU3F4,ZIC3	LUAD
BP	outer ear morphogenesis	8	1	0.0207109	ZIC3	LUAD
BP	myelin maintenance	18	1	0.0462932	PLEC	LUAD
BP	protein acylation	262	3	0.0275076	DR1,MECP2,NAA40	LUAD
BP	regulation of kinase activity	753	5	0.0402385	DLG3,PLEC,PPP2R5A,RAP2B,CEP85	LUAD
BP	regulation of respiratory gaseous exchange	24	2	0.00198734	MECP2,NLGN3	LUAD
BP	regulation of respiratory system process	15	2	0.000828257	MECP2,NLGN3	LUAD
BP	lipid digestion	23	1	0.0492849	ARX	LUAD
BP	NLRP3 inflammasome complex assembly	21	1	0.0443689	STMP1	LUAD
BP	positive regulation by host of viral process	20	1	0.0457529	IGF2R	LUAD
BP	actomyosin contractile ring organization	7	1	0.0170112	PLEC	LUAD
BP	positive regulation of striated muscle tissue development	3	1	0.00846739	MRTFB	LUAD
BP	phosphatidylglycerol metabolic process	36	2	0.00270043	PTPMT1,MECP2	LUAD
BP	regulation of mitotic centrosome separation	9	1	0.0196852	CEP85	LUAD
BP	axial mesoderm development	9	1	0.0228808	ZIC3	LUAD
BP	paraxial mesoderm development	18	1	0.0480552	ZIC3	LUAD
BP	enteric nervous system development	15	1	0.0400071	ARX	LUAD
BP	developmental growth	639	5	0.0231323	SEMA4B,ARX,PLEC,NLGN3,TEC,ALKBH1	LUAD
BP	positive regulation of muscle organ development	3	1	0.00846739	MRTFB	LUAD
BP	axon extension	122	2	0.0464208	SEMA4B,NLGN3	LUAD
BP	anatomical structure development	5752	21	0.0182455	CDX4,SEMA4B,ARX,DLG3,DR1,IGF2R,ITGB5,MECP2,NUMA1,HOOK1,PLEC,NLGN3,POU3F4,PRKAB1,MRTFB,PCDH19,TEC,TFE3,ZIC3,SLIRP,PARD6B,ALKBH1,CABLES1	LUAD
BP	neuromuscular process controlling posture	18	1	0.0457673	MECP2	LUAD
BP	smooth muscle cell differentiation	74	2	0.0137537	MECP2,MRTFB	LUAD
BP	negative regulation of smooth muscle cell differentiation	22	1	0.0463437	MECP2	LUAD
BP	centrosome separation	15	1	0.0340737	CEP85	LUAD
BP	negative regulation of transferase activity	267	3	0.0280356	PLEC,PPP2R5A,CEP85	LUAD
BP	positive regulation of histone H3-K9 methylation	11	1	0.0287914	MECP2	LUAD
BP	response to hydrostatic pressure	5	1	0.0144761	PLEC	LUAD
BP	biological process involved in intraspecies interaction between organisms	53	2	0.00906313	MECP2,NLGN3	LUAD
BP	rhythmic synaptic transmission	3	1	0.00834728	NLGN3	LUAD
BP	excitatory postsynaptic potential	123	2	0.0402873	MECP2,NLGN3	LUAD
BP	inhibitory postsynaptic potential	15	1	0.0415315	NLGN3	LUAD
BP	positive regulation of glial cell proliferation	21	1	0.0486475	MECP2	LUAD
BP	hepaticobiliary system development	144	2	0.0474862	IGF2R,ZIC3	LUAD
BP	regulation of protein tyrosine kinase activity	91	2	0.0229895	DLG3,RAP2B	LUAD
BP	axon development	486	4	0.0444665	SEMA4B,ARX,NLGN3,PARD6B	LUAD
BP	mitochondrion morphogenesis	20	1	0.0478698	PLEC,SLIRP	LUAD
BP	left/right axis specification	15	1	0.0363808	ZIC3	LUAD
BP	cellular response to arsenic-containing substance	20	1	0.0491188	MAPK13	LUAD
BP	cellular response to water stimulus	6	1	0.0170026	PLEC	LUAD
BP	cellular response to hydrostatic pressure	3	1	0.00827634	PLEC	LUAD
BP	vocalization behavior	18	1	0.0485585	NLGN3	LUAD
BP	determination of digestive tract left/right asymmetry	7	1	0.0158996	ZIC3	LUAD
BP	determination of liver left/right asymmetry	6	1	0.0143594	ZIC3	LUAD
BP	epithelial cell fate commitment	15	1	0.0435814	ARX	LUAD
BP	response to sorbitol	7	1	0.0197429	MAPK13	LUAD
BP	cellular response to sorbitol	5	1	0.0136093	MAPK13	LUAD
BP	response to anisomycin	4	1	0.00932164	MAPK13	LUAD
BP	cellular response to anisomycin	3	1	0.00622902	MAPK13	LUAD
BP	primitive streak formation	10	1	0.028126	ZIC3	LUAD
BP	tubulin deacetylation	22	1	0.0491936	DR1	LUAD
BP	regulation of tubulin deacetylation	19	1	0.0428955	DR1	LUAD
BP	positive regulation of microtubule nucleation	8	1	0.0226043	MECP2	LUAD
BP	epithelial cell-cell adhesion	17	1	0.0467572	ITGB5	LUAD
BP	negative regulation of lipid kinase activity	7	1	0.0202878	PPP2R5A	LUAD
BP	positive regulation of brown fat cell differentiation	16	1	0.0443977	TFE3	LUAD
BP	presynaptic membrane organization	9	1	0.0244936	NLGN3	LUAD
BP	postsynaptic membrane assembly	9	1	0.026516	NLGN3	LUAD
BP	presynaptic membrane assembly	8	1	0.0215302	NLGN3	LUAD
BP	mesenchymal cell apoptotic process	15	1	0.0429326	POU3F4	LUAD
BP	GABAergic neuron differentiation	16	1	0.0451072	ARX	LUAD
BP	mitochondrial respirasome assembly	10	1	0.0176362	STMP1	LUAD
BP	trans-synaptic signaling by BDNF	4	1	0.00961733	MECP2	LUAD
BP	chemical synaptic transmission, postsynaptic	129	2	0.0438652	MECP2,NLGN3	LUAD
BP	inflammasome complex assembly	23	1	0.0489728	STMP1	LUAD
BP	regulation of histone H3-K9 trimethylation	12	1	0.0283057	MECP2	LUAD
BP	positive regulation of histone H3-K9 trimethylation	4	1	0.00997432	MECP2	LUAD
BP	regulation of NLRP3 inflammasome complex assembly	19	1	0.0396141	STMP1	LUAD
BP	positive regulation of NLRP3 inflammasome complex assembly	12	1	0.0248012	STMP1	LUAD
BP	cellular response to salt	7	1	0.0182084	MAPK13	LUAD
BP	ceramide 1-phosphate transport	8	1	0.0146079	GLTPD2	LUAD
BP	response to sodium arsenite	6	1	0.0150836	MAPK13	LUAD
BP	cellular response to sodium arsenite	5	1	0.0123766	MAPK13	LUAD
BP	response to tetrachloromethane	4	1	0.01108	IGF2R	LUAD
BP	interneuron migration	15	1	0.043125	ARX	LUAD
BP	manchette assembly	5	1	0.0144175	HOOK1	LUAD
BP	positive regulation of DNA methylation	4	1	0.0112346	MECP2	LUAD
BP	protein localization to perinuclear region of cytoplasm	9	1	0.0232301	HOOK1	LUAD
BP	actomyosin contractile ring assembly actin filament organization	1	1	0.00298203	PLEC	LUAD
BP	negative regulation of transcription from RNA polymerase II promoter involved in smooth muscle cell differentiation	3	1	0.00894645	MECP2	LUAD
BP	positive regulation of AMPA receptor activity	8	1	0.0222726	NLGN3	LUAD
BP	regulation of ATP citrate synthase activity	2	1	0.00569252	PLEC	LUAD
BP	regulation of mesenchymal cell apoptotic process	13	1	0.0369435	POU3F4	LUAD
BP	negative regulation of mesenchymal cell apoptotic process	10	1	0.028184	POU3F4	LUAD
BP	negative regulation of transcription by RNA polymerase II	925	20	0.014494	ZBTB33,CDX4,MAGED2,ARX,HCFC1,AR,MECP2,TAF9B,ATRX,BCOR,HDAC8,MOSPD1,PSMD10,RPL10,BCORL1,ZNF674,TAF1,NKAP,RBM10,PHF6,OGT,MAGED1	LUSC
BP	RNA splicing, via transesterification reactions	297	9	0.030225	PQBP1,FMR1,RBMX,HTATSF1,RBMX2,RBM41,MBNL3,RBM3,RNF113A,RBM10	LUSC
BP	RNA splicing, via transesterification reactions with bulged adenosine as nucleophile	293	9	0.0276258	PQBP1,FMR1,RBMX,HTATSF1,RBMX2,RBM41,MBNL3,RBM3,RNF113A,RBM10	LUSC
BP	alternative mRNA splicing, via spliceosome	78	4	0.020443	PQBP1,FMR1,RBMX,MBNL3,RBM10	LUSC
BP	regulation of alternative mRNA splicing, via spliceosome	61	4	0.00863786	FMR1,RBMX,MBNL3,RBM10	LUSC
BP	mRNA splicing, via spliceosome	293	9	0.0276258	PQBP1,FMR1,RBMX,HTATSF1,RBMX2,RBM41,MBNL3,RBM3,RNF113A,RBM10	LUSC
BP	negative regulation of histone H3-K36 methylation	1	1	0.00625172	BCOR	LUSC
BP	autophagy of mitochondrion	92	4	0.0351793	WDR45,SLC25A5,FUNDC2,TAFAZZIN,OGT	LUSC
BP	box H/ACA RNA 3'-end processing	2	1	0.0222957	DKC1	LUSC
BP	DNA catabolic process, endonucleolytic	25	2	0.0492408	DNASE1L1,AIFM1	LUSC
BP	cell morphogenesis	1005	20	0.0164609	PQBP1,SLC9A6,ZDHHC15,ARX,EFNB1,FGF13,FLNA,BRWD3,GDI1,C1GALT1C1,SH3KBP1,HPRT1,AR,ARHGAP4,MSN,OPHN1,PAK3,PLXNB3,ATP7A,PLXNA3,ZMYM3	LUSC
BP	cell morphogenesis involved in differentiation	717	15	0.0194946	PQBP1,SLC9A6,ZDHHC15,ARX,EFNB1,FGF13,FLNA,GDI1,C1GALT1C1,HPRT1,AR,ARHGAP4,OPHN1,PAK3,PLXNB3,PLXNA3	LUSC
BP	morphogenesis of a polarized epithelium	96	4	0.0272397	DLG3,MSN,OPHN1,MED12	LUSC
BP	blastocyst hatching	25	2	0.0465472	BCOR,PHF6	LUSC
BP	desensitization of G protein-coupled receptor signaling pathway	19	2	0.0276014	UBQLN2,APLN	LUSC
BP	G protein-coupled receptor internalization	13	2	0.0127265	UBQLN2,APLN	LUSC
BP	regulation of oxidative phosphorylation	22	2	0.0370974	ABCD1,ATP7A	LUSC
BP	regulation of receptor internalization	58	4	0.00535851	FMR1,UBQLN2,OPHN1,APLN	LUSC
BP	positive regulation of receptor internalization	26	2	0.0389527	FMR1,APLN	LUSC
BP	tRNA nucleoside ribose methylation	1	1	0.0119189	FTSJ1	LUSC
BP	cytoplasmic translation	157	7	0.0107666	FMR1,FTSJ1,MCTS1,RPL10,RPL39,RPL36A,SH3BGRL	LUSC
BP	renal water retention	1	1	0.0167463	AVPR2	LUSC
BP	nucleobase-containing compound metabolic process	5688	98	0.00344622	ZBTB33,PQBP1,CDX4,CETN2,UTP14A,ZNF275,MAGED2,MSL3,PIM2,MID2,CSTF2,ZXDB,SPIN3,ARX,DKC1,DNASE1L1,TSC22D3,EDA,ELK1,ZNF449,ABCD1,ACSL4,FANCB,PHF8,FLNA,FMR1,ACOT9,FTSJ1,G6PD,BRWD3,SNORA70,SNORD61,RBMX,HTATSF1,CCDC22,HCFC1,HMGB3,HNRNPH2,HPRT1,ZNF81,IRAK1,AR,MECP2,FOXO4,NDUFA1,SPIN2B,NONO,PAK3,CDK16,ARMCX3,TAF9B,RBMX2,POLA1,NDUFB11,GNL3L,POU3F4,ATRX,BCOR,RADX,RBM41,ZNF280C,KRBOX4,MBNL3,HDAC8,ZC4H2,MOSPD…	LUSC
BP	purine nucleobase metabolic process	20	2	0.0357925	HPRT1,PRPS1	LUSC
BP	guanine salvage	1	1	0.018652	HPRT1	LUSC
BP	leading strand elongation	4	1	0.04675	POLA1	LUSC
BP	chromatin organization	593	14	0.0360744	MSL3,PHF8,HCFC1,MECP2,ATRX,BCOR,HDAC8,BCORL1,TSPYL2,SMARCA1,UBE2A,BRCC3,HMGN5,OGT,FAM50A,MORF4L2	LUSC
BP	DNA-templated transcription	3364	63	0.00263249	ZBTB33,PQBP1,CDX4,ZNF275,MAGED2,MSL3,PIM2,MID2,ZXDB,SPIN3,ARX,TSC22D3,EDA,ELK1,ZNF449,PHF8,FLNA,BRWD3,RBMX,HTATSF1,CCDC22,HCFC1,HMGB3,ZNF81,IRAK1,AR,MECP2,FOXO4,SPIN2B,NONO,CDK16,ARMCX3,TAF9B,POU3F4,ATRX,BCOR,ZNF280C,KRBOX4,HDAC8,ZC4H2,MOSPD1,PSMD10,RAP2C,RPL10,RPS6KA3,BCORL1,SCML1,ZNF674,SMARCA1,TAF1,TFE3,ZNF711,ZNF182,ZNF41,ZNF75D,HMGN5,NKAP,RBM10,PHF6,OGT,IKBKG,CASK,APLN,MAGED1,MORF4L2,MED12	LUSC
BP	regulation of DNA-templated transcription	3254	63	0.00105847	ZBTB33,PQBP1,CDX4,ZNF275,MAGED2,MSL3,PIM2,MID2,ZXDB,SPIN3,ARX,TSC22D3,EDA,ELK1,ZNF449,PHF8,FLNA,BRWD3,RBMX,HTATSF1,CCDC22,HCFC1,HMGB3,ZNF81,IRAK1,AR,MECP2,FOXO4,SPIN2B,NONO,CDK16,ARMCX3,TAF9B,POU3F4,ATRX,BCOR,ZNF280C,KRBOX4,HDAC8,ZC4H2,MOSPD1,PSMD10,RAP2C,RPL10,RPS6KA3,BCORL1,SCML1,ZNF674,SMARCA1,TAF1,TFE3,ZNF711,ZNF182,ZNF41,ZNF75D,HMGN5,NKAP,RBM10,PHF6,OGT,IKBKG,CASK,APLN,MAGED1,MORF4L2,MED12	LUSC
BP	regulation of transcription by RNA polymerase II	2462	46	0.00948343	ZBTB33,CDX4,ZNF275,MAGED2,ZXDB,ARX,TSC22D3,ELK1,ZNF449,PHF8,BRWD3,RBMX,HTATSF1,HCFC1,HMGB3,ZNF81,AR,MECP2,FOXO4,ARMCX3,TAF9B,POU3F4,ATRX,BCOR,ZNF280C,HDAC8,MOSPD1,PSMD10,RPL10,RPS6KA3,BCORL1,ZNF674,SMARCA1,TAF1,TFE3,ZNF711,ZNF182,ZNF41,ZNF75D,NKAP,RBM10,PHF6,OGT,IKBKG,CASK,MAGED1,MORF4L2,MED12	LUSC
BP	transcription by RNA polymerase II	2545	46	0.0177267	ZBTB33,CDX4,ZNF275,MAGED2,ZXDB,ARX,TSC22D3,ELK1,ZNF449,PHF8,BRWD3,RBMX,HTATSF1,HCFC1,HMGB3,ZNF81,AR,MECP2,FOXO4,ARMCX3,TAF9B,POU3F4,ATRX,BCOR,ZNF280C,HDAC8,MOSPD1,PSMD10,RPL10,RPS6KA3,BCORL1,ZNF674,SMARCA1,TAF1,TFE3,ZNF711,ZNF182,ZNF41,ZNF75D,NKAP,RBM10,PHF6,OGT,IKBKG,CASK,MAGED1,MORF4L2,MED12	LUSC
BP	mRNA processing	461	12	0.0386203	PQBP1,CSTF2,FMR1,RBMX,HTATSF1,NONO,RBMX2,RBM41,MBNL3,RBM3,RNF113A,RBM10,FAM50A	LUSC
BP	protein deacetylation	121	5	0.0231199	MSL3,FLNA,HDAC8,BEX4,MORF4L2	LUSC
BP	protein monoubiquitination	84	4	0.0275014	FANCB,BCOR,ZC4H2,BRCC3,CUL4B	LUSC
BP	cellular biogenic amine metabolic process	94	6	0.00167046	HPRT1,MAOA,MECP2,ATP7A,SAT1,SMS	LUSC
BP	catecholamine metabolic process	53	3	0.0295532	HPRT1,MAOA,ATP7A	LUSC
BP	polyamine metabolic process	18	2	0.0288294	SAT1,SMS	LUSC
BP	polyamine biosynthetic process	14	2	0.0168421	SAT1,SMS	LUSC
BP	spermine biosynthetic process	2	1	0.0292352	SMS	LUSC
BP	protein targeting	310	9	0.0366384	BCAP31,TIMM17B,CHM,ZDHHC15,TIMM8A,GDI1,LAMP2,ZDHHC9,UBL4A,AIFM1	LUSC
BP	protein targeting to membrane	121	5	0.0292487	CHM,ZDHHC15,GDI1,ZDHHC9,UBL4A	LUSC
BP	cellular aromatic compound metabolic process	5909	103	0.00170396	ZBTB33,PQBP1,CDX4,CETN2,UTP14A,ZNF275,PGRMC1,MAGED2,MSL3,PIM2,MID2,CSTF2,ZXDB,SPIN3,ARX,DKC1,DNASE1L1,TSC22D3,EDA,ELK1,ZNF449,ABCD1,ACSL4,FANCB,ABCB7,PHF8,FLNA,FMR1,ACOT9,FTSJ1,G6PD,BRWD3,SNORA70,SNORD61,RBMX,HTATSF1,CCDC22,HCFC1,HMGB3,HNRNPH2,HPRT1,ZNF81,IRAK1,AR,MAOA,MECP2,FOXO4,NDUFA1,SPIN2B,NONO,PAK3,CDK16,ARMCX3,TAF9B,RBMX2,ATP7A,POLA1,NDUFB11,GNL3L,POU3F4,ATRX,BCOR,RADX,RBM41,ZNF280C,KRBOX4…	LUSC
BP	nitrogen compound metabolic process	9588	145	0.0468555	ZBTB33,PQBP1,BCAP31,CDX4,CETN2,UTP14A,ZNF275,PGRMC1,MAGED2,MSL3,PIM2,MID2,WDR45,CHM,ATG4A,AMER1,CSTF2,ZXDB,ZDHHC15,SPIN3,ARX,DKC1,DLG3,DMD,DNASE1L1,TSC22D3,DUSP9,EDA,ELK1,ZNF449,ABCD1,ACSL4,FANCB,ABCB7,FGF13,PHF8,FLNA,FMR1,ACOT9,FTSJ1,G6PD,BRWD3,SNORA70,SNORD61,GLA,RBMX,HTATSF1,CCDC22,MCTS1,C1GALT1C1,SNX12,UBQLN2,HCFC1,HMGB3,HNRNPH2,HPRT1,IDS,ZNF81,IRAK1,AR,ARAF,LAMP2,MAOA,MECP2,FOXO4,MSN,MTCP1,N…	LUSC
BP	nucleotide transport	37	3	0.0178989	ABCD1,SLC25A5,SLC25A53	LUSC
BP	cellular copper ion homeostasis	16	2	0.0225354	CCDC22,ATP7A	LUSC
BP	autophagy	545	15	0.00803786	RRAGB,PIM2,MID2,WDR45,ATG4A,TAB3,SLC25A5,UBQLN2,LAMP2,TBC1D25,CDK16,MTMR8,FUNDC2,TAFAZZIN,SRPX,OGT,IKBKG	LUSC
BP	mitochondrion organization	525	13	0.0433642	BCAP31,TIMM17B,WDR45,APOOL,TIMM8A,SLC25A5,NDUFA1,ARMCX3,ATP7A,NDUFB11,PSMD10,FUNDC2,TAFAZZIN,OGT,AIFM1	LUSC
BP	inner mitochondrial membrane organization	39	3	0.0206318	APOOL,TIMM8A,TAFAZZIN	LUSC
BP	negative regulation of microtubule depolymerization	27	2	0.0397178	FGF13,MID1IP1	LUSC
BP	protein catabolic process in the vacuole	22	2	0.0392873	LAMP2,RNF128	LUSC
BP	regulation of sister chromatid cohesion	21	2	0.0357233	ATRX,HDAC8	LUSC
BP	I-kappaB kinase/NF-kappaB signaling	283	9	0.0158437	PIM2,MID2,EDA,FLNA,TAB3,CCDC22,IRAK1,AVPR2,TSPAN6,IKBKG	LUSC
BP	spermatogonial cell division	3	1	0.0469248	ZNF449	LUSC
BP	axonogenesis	436	10	0.0251146	SLC9A6,ARX,EFNB1,FGF13,GDI1,ARHGAP4,OPHN1,PAK3,PLXNB3,PLXNA3	LUSC
BP	central nervous system development	1038	19	0.0462767	ARX,FGF13,PHF8,G6PD,IL1RAPL2,HPRT1,MECP2,OPHN1,ATP7A,POU3F4,ATRX,AVPR2,PLXNA3,ZC4H2,PCDH19,RPS6KA3,SMARCA1,TAF1,CUL4B,MED12	LUSC
BP	ultradian rhythm	2	1	0.0250911	ENOX2	LUSC
BP	metabolic process	11390	169	0.043588	ZBTB33,PQBP1,BCAP31,RRAGB,CDX4,ENOX2,CETN2,UTP14A,ZNF275,PGRMC1,MAGED2,MSL3,PIM2,MID2,WDR45,CHM,ATG4A,DGKK,AMER1,CSTF2,FAAH2,ZXDB,ZDHHC15,SPIN3,ARX,DKC1,DLG3,DMD,DNASE1L1,TSC22D3,DUSP9,EDA,ELK1,ZNF449,ABCD1,ACSL4,FANCB,ABCB7,FGF13,PHF8,FLNA,FMR1,ACOT9,FTSJ1,G6PD,BRWD3,TAB3,SNORA70,SNORD61,GK,GLA,RBMX,HTATSF1,CCDC22,MCTS1,C1GALT1C1,SLC25A5,SNX12,UBQLN2,HCFC1,HMGB3,HNRNPH2,HPRT1,IDS,ZNF81,LANCL3,IR…	LUSC
BP	regulation of cell shape	154	5	0.0430573	BRWD3,SH3KBP1,MSN,PLXNB3,PLXNA3	LUSC
BP	regulation of cell size	182	6	0.0235895	FGF13,GDI1,ARHGAP4,MSN,ATP7A,PLXNA3	LUSC
BP	RNA splicing	427	12	0.0225666	PQBP1,FMR1,RBMX,HTATSF1,HNRNPH2,NONO,RBMX2,RBM41,MBNL3,RBM3,RNF113A,RBM10,FAM50A	LUSC
BP	catabolic process	2498	46	0.0248658	BCAP31,RRAGB,PIM2,MID2,WDR45,ATG4A,AMER1,FAAH2,DKC1,DNASE1L1,ABCD1,FLNA,FMR1,TAB3,GK,GLA,CCDC22,SLC25A5,SNX12,UBQLN2,HPRT1,IDS,ARAF,LAMP2,MAOA,MSN,TBC1D25,OCRL,OPHN1,CDK16,MTMR8,PSMD10,SAT1,SH3BGRL,UPF3B,FUNDC2,TAF1,TAFAZZIN,TIMP1,UBE2A,RNF128,RBM10,UBL4A,TKTL1,SRPX,CUL4B,OGT,IKBKG,AIFM1	LUSC
BP	biosynthetic process	5668	104	0.000245946	ZBTB33,PQBP1,CDX4,ZNF275,PGRMC1,MAGED2,MSL3,PIM2,MID2,WDR45,ZXDB,ZDHHC15,SPIN3,ARX,DKC1,DMD,TSC22D3,EDA,ELK1,ZNF449,ABCD1,ACSL4,ABCB7,PHF8,FLNA,FMR1,FTSJ1,G6PD,BRWD3,GK,GLA,RBMX,HTATSF1,CCDC22,MCTS1,C1GALT1C1,HCFC1,HMGB3,HPRT1,ZNF81,IRAK1,AR,MECP2,FOXO4,NDUFA1,SPIN2B,NONO,OCRL,PAK3,NSDHL,ZDHHC9,CDK16,ARMCX3,TAF9B,ATP7A,POLA1,NDUFB11,GNL3L,POU3F4,ATRX,BCOR,TMLHE,ZNF280C,KRBOX4,HDAC8,ZC4H2,MOSPD1,P…	LUSC
BP	macromolecule biosynthetic process	4559	84	0.00115118	ZBTB33,PQBP1,CDX4,ZNF275,MAGED2,MSL3,PIM2,MID2,WDR45,ZXDB,ZDHHC15,SPIN3,ARX,DKC1,TSC22D3,EDA,ELK1,ZNF449,PHF8,FLNA,FMR1,FTSJ1,BRWD3,RBMX,HTATSF1,CCDC22,MCTS1,C1GALT1C1,HCFC1,HMGB3,ZNF81,IRAK1,AR,MECP2,FOXO4,SPIN2B,NONO,PAK3,ZDHHC9,CDK16,ARMCX3,TAF9B,ATP7A,POLA1,GNL3L,POU3F4,ATRX,BCOR,ZNF280C,KRBOX4,HDAC8,ZC4H2,MOSPD1,CHST7,PSMD10,MIR503,RAP2C,RBM3,RPL10,RPL39,RPL36A,RPS6KA3,BCORL1,SCML1,ZNF674,SH…	LUSC
BP	purine nucleobase biosynthetic process	10	2	0.0100651	HPRT1,PRPS1	LUSC
BP	amine metabolic process	114	6	0.00498904	HPRT1,MAOA,MECP2,ATP7A,SAT1,SMS	LUSC
BP	amine catabolic process	18	2	0.0250993	MAOA,SAT1	LUSC
BP	putrescine catabolic process	2	1	0.0248136	SAT1	LUSC
BP	catechol-containing compound metabolic process	53	3	0.0295532	HPRT1,MAOA,ATP7A	LUSC
BP	regulation of biosynthetic process	4017	78	0.000227446	ZBTB33,PQBP1,CDX4,ZNF275,MAGED2,MSL3,PIM2,MID2,ZXDB,SPIN3,ARX,DKC1,TSC22D3,EDA,ELK1,ZNF449,ABCD1,ABCB7,PHF8,FLNA,FMR1,BRWD3,GLA,RBMX,HTATSF1,CCDC22,HCFC1,HMGB3,ZNF81,IRAK1,AR,MECP2,FOXO4,SPIN2B,NONO,PAK3,CDK16,ARMCX3,TAF9B,ATP7A,GNL3L,POU3F4,ATRX,BCOR,ZNF280C,KRBOX4,HDAC8,ZC4H2,MOSPD1,PSMD10,MIR503,RAP2C,MID1IP1,RBM3,RPL10,RPS6KA3,BCORL1,SCML1,ZNF674,SH3BGRL,UPF3B,SMARCA1,TAF1,TAFAZZIN,TFE3,ZNF71…	LUSC
BP	negative regulation of biosynthetic process	1621	29	0.0475552	ZBTB33,CDX4,MAGED2,ARX,ABCD1,ABCB7,FLNA,FMR1,GLA,HCFC1,AR,MECP2,NONO,TAF9B,GNL3L,ATRX,BCOR,HDAC8,MOSPD1,PSMD10,MIR503,RPL10,BCORL1,SCML1,ZNF674,TAF1,NKAP,RBM10,PHF6,OGT,MAGED1	LUSC
BP	positive regulation of biosynthetic process	2017	38	0.0142292	PQBP1,CDX4,MSL3,PIM2,MID2,DKC1,ELK1,ABCD1,ABCB7,PHF8,FMR1,RBMX,HCFC1,AR,MECP2,FOXO4,PAK3,ARMCX3,ATP7A,ATRX,MOSPD1,RAP2C,MID1IP1,RBM3,RPS6KA3,SH3BGRL,UPF3B,SMARCA1,TAF1,TAFAZZIN,TFE3,ZNF711,HMGN5,OGT,IKBKG,CASK,APLN,MAGED1,MORF4L2,MED12	LUSC
BP	regulation of catabolic process	978	27	0.000343081	BCAP31,RRAGB,PIM2,MID2,WDR45,AMER1,DKC1,ABCD1,FLNA,FMR1,TAB3,CCDC22,SLC25A5,SNX12,UBQLN2,ARAF,MSN,TBC1D25,OPHN1,CDK16,MTMR8,PSMD10,TAF1,TIMP1,RNF128,RBM10,CUL4B,OGT,IKBKG,AIFM1	LUSC
BP	negative regulation of catabolic process	319	9	0.0271012	DKC1,FLNA,FMR1,TAB3,SNX12,OPHN1,MTMR8,TAF1,TIMP1,RBM10,OGT	LUSC
BP	positive regulation of catabolic process	522	15	0.0049169	BCAP31,PIM2,MID2,WDR45,AMER1,ABCD1,FMR1,CCDC22,SLC25A5,UBQLN2,MSN,CDK16,PSMD10,TAF1,RNF128,CUL4B,IKBKG	LUSC
BP	regulation of gene expression	4993	81	0.022052	ZBTB33,PQBP1,CDX4,ZNF275,MAGED2,MSL3,PIM2,MID2,ZXDB,SPIN3,ARX,DKC1,TSC22D3,EDA,ELK1,ZNF449,ABCD1,PHF8,FLNA,FMR1,BRWD3,RBMX,HTATSF1,CCDC22,SNX12,HCFC1,HMGB3,HNRNPH2,ZNF81,IRAK1,AR,MECP2,FOXO4,MSN,SPIN2B,NONO,CDK16,ARMCX3,TAF9B,ATP7A,POLA1,POU3F4,ATRX,BCOR,AVPR2,OTUD5,ZNF280C,KRBOX4,MBNL3,HDAC8,ZC4H2,MOSPD1,PSMD10,MIR503,RAP2C,RBM3,RPL10,RPS6KA3,BCORL1,SCML1,ZNF674,SH3BGRL,UPF3B,SMARCA1,TAF1,TFE3,Z…	LUSC
BP	regulation of autophagy	339	10	0.0159585	RRAGB,PIM2,MID2,WDR45,TAB3,SLC25A5,UBQLN2,TBC1D25,CDK16,MTMR8,IKBKG	LUSC
BP	positive regulation of autophagy	142	5	0.0450538	PIM2,MID2,WDR45,SLC25A5,CDK16,IKBKG	LUSC
BP	regulation of macromolecule biosynthetic process	3789	72	0.00084088	ZBTB33,PQBP1,CDX4,ZNF275,MAGED2,MSL3,PIM2,MID2,ZXDB,SPIN3,ARX,DKC1,TSC22D3,EDA,ELK1,ZNF449,PHF8,FLNA,FMR1,BRWD3,RBMX,HTATSF1,CCDC22,HCFC1,HMGB3,ZNF81,IRAK1,AR,MECP2,FOXO4,SPIN2B,NONO,PAK3,CDK16,ARMCX3,TAF9B,GNL3L,POU3F4,ATRX,BCOR,ZNF280C,KRBOX4,HDAC8,ZC4H2,MOSPD1,PSMD10,MIR503,RAP2C,RBM3,RPL10,RPS6KA3,BCORL1,SCML1,ZNF674,SH3BGRL,UPF3B,SMARCA1,TAF1,TFE3,ZNF711,ZNF182,ZNF41,ZNF75D,HMGN5,NKAP,RBM10,…	LUSC
BP	positive regulation of macromolecule biosynthetic process	1866	33	0.0473789	PQBP1,CDX4,MSL3,PIM2,MID2,DKC1,ELK1,PHF8,FMR1,RBMX,HCFC1,AR,MECP2,FOXO4,PAK3,ARMCX3,ATRX,MOSPD1,RAP2C,RBM3,RPS6KA3,SH3BGRL,UPF3B,SMARCA1,TAF1,TFE3,ZNF711,HMGN5,OGT,IKBKG,CASK,APLN,MAGED1,MORF4L2,MED12	LUSC
BP	negative regulation of cell-substrate adhesion	64	3	0.0352778	NEXMIF,MIR503,CASK	LUSC
BP	negative regulation of neuron projection development	142	5	0.0259957	FGF13,FLNA,GDI1,ARHGAP4,PLXNA3	LUSC
BP	fatty-acyl-CoA transport	2	1	0.0293041	ABCD1	LUSC
BP	nucleobase-containing compound transport	214	7	0.0348514	CETN2,ABCD1,FMR1,SLC25A5,SLC25A53,UPF3B,SLC35A2	LUSC
BP	energy derivation by oxidation of organic compounds	313	9	0.0412855	ABCD1,NDUFA1,PHKA1,PHKA2,ATP7A,NDUFB11,TAFAZZIN,PPP1R3F,SLC25A14	LUSC
BP	cellular component organization	6072	96	0.0354516	PQBP1,BCAP31,TIMM17B,SLC9A6,CETN2,MSL3,TMSB15A,WDR45,COL4A5,COL4A6,APOOL,DOCK11,ZDHHC15,TIMM8A,ARX,DIAPH2,DKC1,DMD,EFNB1,VMA21,ABCD1,ABCB7,FGF13,PHF8,SEPTIN6,FLNA,FMR1,KIF4A,CENPI,G6PD,BRWD3,IL1RAPL2,GDI1,RBMX,HTATSF1,MCTS1,SLC25A5,SNX12,UBQLN2,SH3KBP1,HCFC1,HMGB3,HPRT1,AR,KCND1,LAMP2,ARHGAP4,MECP2,MSN,NDUFA1,TBC1D25,OCRL,OPHN1,PAK3,PDZD11,CDK16,ARMCX3,TAF9B,RBMX2,PLXNB3,ATP6AP1,ATP7A,NDUFB11,GNL…	LUSC
BP	RNA metabolic process	4624	80	0.00643062	ZBTB33,PQBP1,CDX4,UTP14A,ZNF275,MAGED2,MSL3,PIM2,MID2,CSTF2,ZXDB,SPIN3,ARX,DKC1,TSC22D3,EDA,ELK1,ZNF449,PHF8,FLNA,FMR1,FTSJ1,BRWD3,SNORA70,SNORD61,RBMX,HTATSF1,CCDC22,HCFC1,HMGB3,HNRNPH2,ZNF81,IRAK1,AR,MECP2,FOXO4,SPIN2B,NONO,CDK16,ARMCX3,TAF9B,RBMX2,POLA1,POU3F4,ATRX,BCOR,RBM41,ZNF280C,KRBOX4,MBNL3,HDAC8,ZC4H2,MOSPD1,PSMD10,RAP2C,RBM3,RPL10,RPS6KA3,BCORL1,SCML1,ZNF674,UPF3B,SMARCA1,TAF1,TFE3,ZNF…	LUSC
BP	sno(s)RNA metabolic process	17	2	0.0278286	DKC1,RNF113A	LUSC
BP	synaptic vesicle exocytosis	109	4	0.048357	FMR1,SYN1,SYP,CASK	LUSC
BP	synaptic vesicle maturation	12	2	0.0123807	ZDHHC15,SYP	LUSC
BP	O-glycan processing, core 1	2	1	0.0346337	C1GALT1C1	LUSC
BP	histone ubiquitination	52	3	0.0344373	BCOR,UBE2A,BRCC3,CUL4B	LUSC
BP	heterocycle biosynthetic process	3868	75	0.000438978	ZBTB33,PQBP1,CDX4,ZNF275,PGRMC1,MAGED2,MSL3,PIM2,MID2,ZXDB,SPIN3,ARX,DKC1,TSC22D3,EDA,ELK1,ZNF449,ACSL4,ABCB7,PHF8,FLNA,BRWD3,RBMX,HTATSF1,CCDC22,HCFC1,HMGB3,HPRT1,ZNF81,IRAK1,AR,MECP2,FOXO4,NDUFA1,SPIN2B,NONO,PAK3,CDK16,ARMCX3,TAF9B,POLA1,NDUFB11,GNL3L,POU3F4,ATRX,BCOR,ZNF280C,KRBOX4,HDAC8,ZC4H2,MOSPD1,PRPS1,PSMD10,RAP2C,RPL10,RPS6KA3,BCORL1,SCML1,ZNF674,SMARCA1,TAF1,TAFAZZIN,TFE3,ZNF711,ZNF182,…	LUSC
BP	peptidyl-cysteine modification	49	3	0.0364281	ZDHHC15,DMD,ZDHHC9	LUSC
BP	isopeptide cross-linking	2	1	0.0332363	RNF113A	LUSC
BP	isopeptide cross-linking via N6-glycyl-L-lysine	1	1	0.0171248	RNF113A	LUSC
BP	somatic sex determination	2	1	0.024216	AR	LUSC
BP	viral latency	3	1	0.0290119	HCFC1	LUSC
BP	latent virus replication	1	1	0.00702251	HCFC1	LUSC
BP	release from viral latency	1	1	0.00702251	HCFC1	LUSC
BP	male somatic sex determination	1	1	0.00678974	AR	LUSC
BP	regulation of nucleobase-containing compound metabolic process	3865	76	0.000219659	ZBTB33,PQBP1,CDX4,ZNF275,MAGED2,MSL3,PIM2,MID2,ZXDB,SPIN3,ARX,DKC1,TSC22D3,EDA,ELK1,ZNF449,FANCB,PHF8,FLNA,FMR1,BRWD3,RBMX,HTATSF1,CCDC22,HCFC1,HMGB3,HNRNPH2,ZNF81,IRAK1,AR,MECP2,FOXO4,SPIN2B,NONO,PAK3,CDK16,ARMCX3,TAF9B,GNL3L,POU3F4,ATRX,BCOR,RADX,ZNF280C,KRBOX4,MBNL3,HDAC8,ZC4H2,MOSPD1,PSMD10,RAP2C,RBM3,RPL10,RPS6KA3,BCORL1,SCML1,TSPYL2,ZNF674,SMARCA1,TAF1,TAFAZZIN,TFE3,ZNF711,ZNF182,ZNF41,ZNF7…	LUSC
BP	regulation of metabolic process	6798	113	0.00281309	ZBTB33,PQBP1,BCAP31,RRAGB,CDX4,ZNF275,MAGED2,MSL3,PIM2,MID2,WDR45,AMER1,ZXDB,SPIN3,ARX,DKC1,DLG3,DMD,TSC22D3,EDA,ELK1,ZNF449,ABCD1,FANCB,ABCB7,FGF13,PHF8,FLNA,FMR1,G6PD,BRWD3,TAB3,GLA,RBMX,HTATSF1,CCDC22,SLC25A5,SNX12,UBQLN2,HCFC1,HMGB3,HNRNPH2,HPRT1,ZNF81,IRAK1,AR,ARAF,MECP2,FOXO4,MSN,MTCP1,SPIN2B,NONO,TBC1D25,OPHN1,PAK3,CDK16,ARMCX3,TAF9B,ATP7A,POLA1,GNL3L,POU3F4,ATRX,BCOR,RADX,AVPR2,OTUD5,ZNF2…	LUSC
BP	aromatic compound biosynthetic process	3882	76	0.000289839	ZBTB33,PQBP1,CDX4,ZNF275,PGRMC1,MAGED2,MSL3,PIM2,MID2,ZXDB,SPIN3,ARX,DKC1,TSC22D3,EDA,ELK1,ZNF449,ACSL4,ABCB7,PHF8,FLNA,BRWD3,RBMX,HTATSF1,CCDC22,HCFC1,HMGB3,HPRT1,ZNF81,IRAK1,AR,MECP2,FOXO4,NDUFA1,SPIN2B,NONO,PAK3,CDK16,ARMCX3,TAF9B,ATP7A,POLA1,NDUFB11,GNL3L,POU3F4,ATRX,BCOR,ZNF280C,KRBOX4,HDAC8,ZC4H2,MOSPD1,PRPS1,PSMD10,RAP2C,RPL10,RPS6KA3,BCORL1,SCML1,ZNF674,SMARCA1,TAF1,TAFAZZIN,TFE3,ZNF711,Z…	LUSC
BP	cell differentiation in hindbrain	22	2	0.026264	OPHN1,ATP7A	LUSC
BP	olfactory nerve morphogenesis	2	1	0.013996	PLXNA3	LUSC
BP	olfactory nerve formation	2	1	0.013996	PLXNA3	LUSC
BP	trigeminal nerve morphogenesis	4	1	0.032272	PLXNA3	LUSC
BP	trigeminal nerve structural organization	4	1	0.032272	PLXNA3	LUSC
BP	cerebellar cortex formation	25	2	0.0344887	OPHN1,ATP7A	LUSC
BP	globus pallidus development	4	1	0.039724	ARX	LUSC
BP	branchiomotor neuron axon guidance	5	1	0.046618	PLXNA3	LUSC
BP	embryonic olfactory bulb interneuron precursor migration	1	1	0.00670255	ARX	LUSC
BP	pyramidal neuron differentiation	14	2	0.010824	ATP7A,PLXNA3	LUSC
BP	pyramidal neuron development	11	2	0.00684135	ATP7A,PLXNA3	LUSC
BP	forebrain neuron development	24	2	0.0304357	ATP7A,PLXNA3	LUSC
BP	cerebral cortex neuron differentiation	27	3	0.00304896	ARX,HPRT1,OPHN1	LUSC
BP	central nervous system neuron differentiation	174	6	0.0137085	ARX,HPRT1,OPHN1,ATP7A,PLXNA3,ZC4H2	LUSC
BP	central nervous system neuron development	85	4	0.0169714	ARX,HPRT1,ATP7A,PLXNA3	LUSC
BP	negative adaptation of signaling pathway	19	2	0.0276014	UBQLN2,APLN	LUSC
BP	regulation of anatomical structure morphogenesis	967	18	0.0445775	PQBP1,ZDHHC15,FGF13,FLNA,BRWD3,GDI1,SH3KBP1,AR,ARHGAP4,MECP2,FOXO4,MSN,PAK3,PLXNB3,PLXNA3,MIR503,ZMYM3,MAGED1,MED12	LUSC
BP	regulation of cell morphogenesis	307	8	0.0351091	FLNA,BRWD3,SH3KBP1,MSN,PAK3,PLXNB3,PLXNA3,ZMYM3	LUSC
BP	adaptation of signaling pathway	21	2	0.0338706	UBQLN2,APLN	LUSC
BP	polarized epithelial cell differentiation	24	2	0.0368603	MSN,OPHN1	LUSC
BP	regulation of histone methylation	81	4	0.0225081	HCFC1,MECP2,ATRX,BCOR,OGT	LUSC
BP	snRNA pseudouridine synthesis	3	1	0.0420021	DKC1	LUSC
BP	neuron projection development	953	18	0.0364408	PQBP1,SLC9A6,ZDHHC15,ARX,EFNB1,FGF13,FLNA,FMR1,GDI1,HPRT1,ARHGAP4,MECP2,OPHN1,PAK3,CDK16,PLXNB3,ATP7A,PLXNA3,CUL4B	LUSC
BP	regulation of cellular metabolic process	5445	101	0.000116163	ZBTB33,PQBP1,BCAP31,RRAGB,CDX4,ZNF275,MAGED2,MSL3,PIM2,MID2,WDR45,ZXDB,SPIN3,ARX,DKC1,DLG3,DMD,TSC22D3,EDA,ELK1,ZNF449,ABCD1,FANCB,ABCB7,FGF13,PHF8,FLNA,FMR1,G6PD,BRWD3,TAB3,GLA,RBMX,HTATSF1,CCDC22,SLC25A5,UBQLN2,HCFC1,HMGB3,HNRNPH2,HPRT1,ZNF81,IRAK1,AR,ARAF,MECP2,FOXO4,MTCP1,SPIN2B,NONO,TBC1D25,PAK3,CDK16,ARMCX3,TAF9B,ATP7A,GNL3L,POU3F4,ATRX,BCOR,RADX,ZNF280C,MTMR8,KRBOX4,MBNL3,HDAC8,ZC4H2,MOSPD…	LUSC
BP	positive regulation of cellular metabolic process	3023	51	0.0360519	PQBP1,BCAP31,CDX4,MSL3,PIM2,MID2,WDR45,DKC1,DLG3,ELK1,ABCD1,FANCB,ABCB7,FGF13,PHF8,FMR1,RBMX,CCDC22,SLC25A5,UBQLN2,HCFC1,HPRT1,IRAK1,AR,ARAF,MECP2,FOXO4,MTCP1,PAK3,CDK16,ARMCX3,ATP7A,ATRX,MOSPD1,PSMD10,RAP2C,MID1IP1,RBM3,RPS6KA3,SH3BGRL,UPF3B,SMARCA1,TAF1,TAFAZZIN,TFE3,ZNF711,BRCC3,HMGN5,OGT,IKBKG,CASK,APLN,MAGED1,MORF4L2,MED12	LUSC
BP	regulation of cellular biosynthetic process	3953	78	0.000134547	ZBTB33,PQBP1,CDX4,ZNF275,MAGED2,MSL3,PIM2,MID2,ZXDB,SPIN3,ARX,DKC1,TSC22D3,EDA,ELK1,ZNF449,ABCD1,ABCB7,PHF8,FLNA,FMR1,BRWD3,GLA,RBMX,HTATSF1,CCDC22,HCFC1,HMGB3,ZNF81,IRAK1,AR,MECP2,FOXO4,SPIN2B,NONO,PAK3,CDK16,ARMCX3,TAF9B,ATP7A,GNL3L,POU3F4,ATRX,BCOR,ZNF280C,KRBOX4,HDAC8,ZC4H2,MOSPD1,PSMD10,MIR503,RAP2C,MID1IP1,RBM3,RPL10,RPS6KA3,BCORL1,SCML1,ZNF674,SH3BGRL,UPF3B,SMARCA1,TAF1,TAFAZZIN,TFE3,ZNF71…	LUSC
BP	positive regulation of cellular biosynthetic process	1975	38	0.0104939	PQBP1,CDX4,MSL3,PIM2,MID2,DKC1,ELK1,ABCD1,ABCB7,PHF8,FMR1,RBMX,HCFC1,AR,MECP2,FOXO4,PAK3,ARMCX3,ATP7A,ATRX,MOSPD1,RAP2C,MID1IP1,RBM3,RPS6KA3,SH3BGRL,UPF3B,SMARCA1,TAF1,TAFAZZIN,TFE3,ZNF711,HMGN5,OGT,IKBKG,CASK,APLN,MAGED1,MORF4L2,MED12	LUSC
BP	regulation of cellular catabolic process	783	20	0.00468986	BCAP31,RRAGB,PIM2,MID2,WDR45,DKC1,ABCD1,FMR1,TAB3,CCDC22,SLC25A5,UBQLN2,ARAF,TBC1D25,CDK16,MTMR8,PSMD10,TAF1,TIMP1,RBM10,OGT,IKBKG,AIFM1	LUSC
BP	negative regulation of cell projection organization	190	6	0.0258268	FGF13,FLNA,GDI1,ARHGAP4,PLXNB3,PLXNA3	LUSC
BP	positive regulation of cell projection organization	347	9	0.0271284	DOCK11,ZDHHC15,FLNA,FMR1,GDI1,PAK3,PLXNB3,ATP7A,PLXNA3	LUSC
BP	regulation of protein stability	318	10	0.0148153	PIM2,FLNA,HCFC1,LAMP2,TAF9B,GNL3L,HDAC8,TAF1,VBP1,RNF128,UBL4A	LUSC
BP	cardiolipin metabolic process	17	2	0.0231925	MECP2,TAFAZZIN	LUSC
BP	regulation of tyrosinase activity	2	1	0.0242309	ATP7A	LUSC
BP	positive regulation of tyrosinase activity	2	1	0.0242309	ATP7A	LUSC
BP	RNA biosynthetic process	3383	64	0.00193906	ZBTB33,PQBP1,CDX4,ZNF275,MAGED2,MSL3,PIM2,MID2,ZXDB,SPIN3,ARX,TSC22D3,EDA,ELK1,ZNF449,PHF8,FLNA,BRWD3,RBMX,HTATSF1,CCDC22,HCFC1,HMGB3,ZNF81,IRAK1,AR,MECP2,FOXO4,SPIN2B,NONO,CDK16,ARMCX3,TAF9B,POLA1,POU3F4,ATRX,BCOR,ZNF280C,KRBOX4,HDAC8,ZC4H2,MOSPD1,PSMD10,RAP2C,RPL10,RPS6KA3,BCORL1,SCML1,ZNF674,SMARCA1,TAF1,TFE3,ZNF711,ZNF182,ZNF41,ZNF75D,HMGN5,NKAP,RBM10,PHF6,OGT,IKBKG,CASK,APLN,MAGED1,MORF4L2,M…	LUSC
BP	polyamine acetylation	2	1	0.0326603	SAT1	LUSC
BP	spermidine acetylation	2	1	0.0326603	SAT1	LUSC
BP	cell part morphogenesis	659	13	0.041261	PQBP1,SLC9A6,ZDHHC15,ARX,EFNB1,FGF13,GDI1,HPRT1,ARHGAP4,OPHN1,PAK3,PLXNB3,ATP7A,PLXNA3	LUSC
BP	histone H2A ubiquitination	32	3	0.00964783	BCOR,UBE2A,BRCC3,CUL4B	LUSC
BP	response to testosterone	41	3	0.0184922	ELK1,AR,MSN	LUSC
BP	box H/ACA RNA metabolic process	3	1	0.0357866	DKC1	LUSC
BP	negative regulation of maintenance of sister chromatid cohesion	3	1	0.0460196	ATRX	LUSC
BP	negative regulation of maintenance of mitotic sister chromatid cohesion	3	1	0.0460196	ATRX	LUSC
BP	snoRNA splicing	2	1	0.0301471	RNF113A	LUSC
BP	urate biosynthetic process	2	1	0.034573	PRPS1	LUSC
BP	cellular nitrogen compound metabolic process	6525	113	0.00134697	ZBTB33,PQBP1,CDX4,CETN2,UTP14A,ZNF275,PGRMC1,MAGED2,MSL3,PIM2,MID2,CSTF2,ZXDB,SPIN3,ARX,DKC1,DMD,DNASE1L1,TSC22D3,EDA,ELK1,ZNF449,ABCD1,ACSL4,FANCB,ABCB7,PHF8,FLNA,FMR1,ACOT9,FTSJ1,G6PD,BRWD3,SNORA70,SNORD61,GLA,RBMX,HTATSF1,CCDC22,MCTS1,HCFC1,HMGB3,HNRNPH2,HPRT1,ZNF81,IRAK1,AR,MAOA,MECP2,FOXO4,NDUFA1,SPIN2B,NONO,PAK3,CDK16,ARMCX3,TAF9B,RBMX2,ATP7A,POLA1,NDUFB11,GNL3L,POU3F4,ATRX,BCOR,RADX,TMLHE,…	LUSC
BP	nucleobase-containing compound biosynthetic process	3798	73	0.000666121	ZBTB33,PQBP1,CDX4,ZNF275,MAGED2,MSL3,PIM2,MID2,ZXDB,SPIN3,ARX,DKC1,TSC22D3,EDA,ELK1,ZNF449,ACSL4,PHF8,FLNA,BRWD3,RBMX,HTATSF1,CCDC22,HCFC1,HMGB3,HPRT1,ZNF81,IRAK1,AR,MECP2,FOXO4,NDUFA1,SPIN2B,NONO,PAK3,CDK16,ARMCX3,TAF9B,POLA1,NDUFB11,GNL3L,POU3F4,ATRX,BCOR,ZNF280C,KRBOX4,HDAC8,ZC4H2,MOSPD1,PRPS1,PSMD10,RAP2C,RPL10,RPS6KA3,BCORL1,SCML1,ZNF674,SMARCA1,TAF1,TAFAZZIN,TFE3,ZNF711,ZNF182,ZNF41,ZNF75D,…	LUSC
BP	iron ion transmembrane transport	21	2	0.0324406	ABCB7,ATP7A	LUSC
BP	box H/ACA RNA processing	2	1	0.0222957	DKC1	LUSC
BP	establishment or maintenance of apical/basal cell polarity	55	3	0.03253	DLG3,MSN,OPHN1,PDZD11	LUSC
BP	establishment of apical/basal cell polarity	22	2	0.0330594	MSN,OPHN1	LUSC
BP	post-embryonic appendage morphogenesis	1	1	0.0186847	ATRX	LUSC
BP	post-embryonic limb morphogenesis	1	1	0.0186847	ATRX	LUSC
BP	post-embryonic forelimb morphogenesis	1	1	0.0186847	ATRX	LUSC
BP	hatching	25	2	0.0465472	BCOR,PHF6	LUSC
BP	histone H2A monoubiquitination	23	2	0.0381241	BCOR,BRCC3,CUL4B	LUSC
BP	histone H4-K20 demethylation	3	1	0.048901	PHF8	LUSC
BP	protein deacylation	132	5	0.0341422	MSL3,FLNA,HDAC8,BEX4,MORF4L2	LUSC
BP	very long-chain fatty-acyl-CoA metabolic process	2	1	0.0309509	ABCD1	LUSC
BP	very long-chain fatty-acyl-CoA catabolic process	1	1	0.0181358	ABCD1	LUSC
BP	histone H3-K9 trimethylation	17	2	0.02546	MECP2,ATRX	LUSC
BP	collagen-activated tyrosine kinase receptor signaling pathway	12	2	0.00755437	COL4A5,COL4A6	LUSC
BP	collagen-activated signaling pathway	17	2	0.0181365	COL4A5,COL4A6	LUSC
BP	negative regulation of fibroblast growth factor receptor signaling pathway	22	2	0.02138	MIR503,APLN	LUSC
BP	regulation of protein catabolic process	355	13	0.00131594	BCAP31,AMER1,FLNA,FMR1,SNX12,UBQLN2,ARAF,MSN,OPHN1,PSMD10,TAF1,TIMP1,RNF128,CUL4B,OGT	LUSC
BP	cellular biogenic amine catabolic process	16	2	0.0216518	MAOA,SAT1	LUSC
BP	cristae formation	18	2	0.0243543	APOOL,TAFAZZIN	LUSC
BP	epinephrine metabolic process	3	1	0.0409454	ATP7A	LUSC
BP	dopamine metabolic process	39	3	0.0127389	HPRT1,MAOA,ATP7A	LUSC
BP	hypoxanthine salvage	2	1	0.0363238	HPRT1	LUSC
BP	regulation of I-kappaB kinase/NF-kappaB signaling	251	8	0.0219411	PIM2,MID2,EDA,FLNA,TAB3,CCDC22,IRAK1,TSPAN6,IKBKG	LUSC
BP	positive regulation of I-kappaB kinase/NF-kappaB signaling	187	8	0.00475664	PIM2,MID2,EDA,FLNA,TAB3,CCDC22,IRAK1,TSPAN6,IKBKG	LUSC
BP	sno(s)RNA processing	14	2	0.0198312	DKC1,RNF113A	LUSC
BP	regulation of RNA splicing	175	7	0.010235	PQBP1,FMR1,RBMX,HNRNPH2,MBNL3,RBM3,RBM10,FAM50A	LUSC
BP	histone H2A acetylation	23	2	0.0453703	MSL3,MORF4L2	LUSC
BP	histone H4-K16 acetylation	21	2	0.031678	MSL3,HCFC1,OGT	LUSC
BP	cellular amine metabolic process	105	6	0.00318708	HPRT1,MAOA,MECP2,ATP7A,SAT1,SMS	LUSC
BP	cellular metabolic process	9593	153	0.0039166	ZBTB33,PQBP1,BCAP31,RRAGB,CDX4,ENOX2,CETN2,UTP14A,ZNF275,PGRMC1,MAGED2,MSL3,PIM2,MID2,WDR45,CHM,ATG4A,DGKK,CSTF2,FAAH2,ZXDB,ZDHHC15,SPIN3,ARX,DKC1,DLG3,DMD,DNASE1L1,TSC22D3,DUSP9,EDA,ELK1,ZNF449,ABCD1,ACSL4,FANCB,ABCB7,FGF13,PHF8,FLNA,FMR1,ACOT9,FTSJ1,G6PD,BRWD3,TAB3,SNORA70,SNORD61,GK,GLA,RBMX,HTATSF1,CCDC22,MCTS1,C1GALT1C1,SLC25A5,UBQLN2,HCFC1,HMGB3,HNRNPH2,HPRT1,IDS,ZNF81,IRAK1,AR,ARAF,LAMP2,M…	LUSC
BP	primary metabolic process	10073	153	0.0301804	ZBTB33,PQBP1,BCAP31,CDX4,CETN2,UTP14A,ZNF275,MAGED2,MSL3,PIM2,MID2,WDR45,CHM,ATG4A,DGKK,AMER1,CSTF2,FAAH2,ZXDB,ZDHHC15,SPIN3,ARX,DKC1,DLG3,DMD,DNASE1L1,TSC22D3,DUSP9,EDA,ELK1,ZNF449,ABCD1,ACSL4,FANCB,FGF13,PHF8,FLNA,FMR1,ACOT9,FTSJ1,G6PD,BRWD3,SNORA70,SNORD61,GK,GLA,RBMX,HTATSF1,CCDC22,MCTS1,C1GALT1C1,SNX12,UBQLN2,HCFC1,HMGB3,HNRNPH2,HPRT1,IDS,ZNF81,LANCL3,IRAK1,AR,ARAF,LAMP2,MECP2,FOXO4,MSN,MTCP…	LUSC
BP	cellular biosynthetic process	5517	103	0.000131761	ZBTB33,PQBP1,CDX4,ZNF275,PGRMC1,MAGED2,MSL3,PIM2,MID2,WDR45,ZXDB,ZDHHC15,SPIN3,ARX,DKC1,DMD,TSC22D3,EDA,ELK1,ZNF449,ABCD1,ACSL4,ABCB7,PHF8,FLNA,FMR1,FTSJ1,BRWD3,GK,GLA,RBMX,HTATSF1,CCDC22,MCTS1,C1GALT1C1,HCFC1,HMGB3,HPRT1,ZNF81,IRAK1,AR,MECP2,FOXO4,NDUFA1,SPIN2B,NONO,OCRL,PAK3,ZDHHC9,CDK16,ARMCX3,TAF9B,ATP7A,POLA1,NDUFB11,GNL3L,POU3F4,ATRX,BCOR,TMLHE,ZNF280C,KRBOX4,HDAC8,ZC4H2,MOSPD1,PRPS1,CHST7,…	LUSC
BP	cellular nitrogen compound biosynthetic process	4604	89	0.000150713	ZBTB33,PQBP1,CDX4,ZNF275,PGRMC1,MAGED2,MSL3,PIM2,MID2,ZXDB,SPIN3,ARX,DKC1,DMD,TSC22D3,EDA,ELK1,ZNF449,ACSL4,ABCB7,PHF8,FLNA,FMR1,FTSJ1,BRWD3,GLA,RBMX,HTATSF1,CCDC22,MCTS1,HCFC1,HMGB3,HPRT1,ZNF81,IRAK1,AR,MECP2,FOXO4,NDUFA1,SPIN2B,NONO,PAK3,CDK16,ARMCX3,TAF9B,POLA1,NDUFB11,GNL3L,POU3F4,ATRX,BCOR,TMLHE,ZNF280C,KRBOX4,HDAC8,ZC4H2,MOSPD1,PRPS1,PSMD10,MIR503,RAP2C,RBM3,RPL10,RPL39,RPL36A,RPS6KA3,SAT1,…	LUSC
BP	early endosome to late endosome transport	42	3	0.0205176	FLNA,SNX12,MSN	LUSC
BP	protein import into mitochondrial intermembrane space	3	1	0.0465653	AIFM1	LUSC
BP	establishment or maintenance of neuroblast polarity	3	1	0.0418315	FGF13	LUSC
BP	establishment or maintenance of epithelial cell apical/basal polarity	51	3	0.02732	DLG3,MSN,OPHN1,PDZD11	LUSC
BP	establishment of epithelial cell apical/basal polarity	17	2	0.021245	MSN,OPHN1	LUSC
BP	establishment of neuroblast polarity	3	1	0.0418315	FGF13	LUSC
BP	negative regulation of integrin biosynthetic process	2	1	0.0198959	AR	LUSC
BP	positive regulation of fatty acid biosynthetic process	23	2	0.0449659	ABCD1,MID1IP1	LUSC
BP	positive regulation of integrin biosynthetic process	3	1	0.0270863	AR	LUSC
BP	positive regulation of protein catabolic process	207	8	0.00737086	BCAP31,AMER1,FMR1,UBQLN2,MSN,PSMD10,TAF1,RNF128,CUL4B	LUSC
BP	negative regulation of DNA-templated transcription	1239	23	0.0484028	ZBTB33,CDX4,MAGED2,ARX,FLNA,HCFC1,AR,MECP2,NONO,TAF9B,ATRX,BCOR,HDAC8,MOSPD1,PSMD10,RPL10,BCORL1,SCML1,ZNF674,TAF1,NKAP,RBM10,PHF6,OGT,MAGED1	LUSC
BP	negative regulation of nucleobase-containing compound metabolic process	1473	30	0.0102483	ZBTB33,CDX4,MAGED2,ARX,DKC1,FANCB,FLNA,FMR1,RBMX,HCFC1,AR,MECP2,NONO,TAF9B,GNL3L,ATRX,BCOR,RADX,HDAC8,MOSPD1,PSMD10,RPL10,BCORL1,SCML1,TSPYL2,ZNF674,TAF1,NKAP,RBM10,PHF6,OGT,MAGED1	LUSC
BP	guanine biosynthetic process	1	1	0.018652	HPRT1	LUSC
BP	hypoxanthine metabolic process	4	2	0.00188968	HPRT1,PRPS1	LUSC
BP	hypoxanthine biosynthetic process	3	2	0.000931116	HPRT1,PRPS1	LUSC
BP	nucleobase biosynthetic process	18	2	0.0304029	HPRT1,PRPS1	LUSC
BP	pigment biosynthetic process	56	3	0.0472331	PGRMC1,ABCB7,ATP7A	LUSC
BP	heterocycle metabolic process	5854	102	0.00182188	ZBTB33,PQBP1,CDX4,CETN2,UTP14A,ZNF275,PGRMC1,MAGED2,MSL3,PIM2,MID2,CSTF2,ZXDB,SPIN3,ARX,DKC1,DNASE1L1,TSC22D3,EDA,ELK1,ZNF449,ABCD1,ACSL4,FANCB,ABCB7,PHF8,FLNA,FMR1,ACOT9,FTSJ1,G6PD,BRWD3,SNORA70,SNORD61,RBMX,HTATSF1,CCDC22,HCFC1,HMGB3,HNRNPH2,HPRT1,ZNF81,IRAK1,AR,MECP2,FOXO4,NDUFA1,SPIN2B,NONO,PAK3,CDK16,ARMCX3,TAF9B,RBMX2,ATP7A,POLA1,NDUFB11,GNL3L,POU3F4,ATRX,BCOR,RADX,RBM41,ZNF280C,KRBOX4,MBNL…	LUSC
BP	muscle cell cellular homeostasis	23	2	0.0405824	DMD,LAMP2	LUSC
BP	phospholipid dephosphorylation	45	3	0.0212784	OCRL,MTMR8,MTMR1	LUSC
BP	phosphatidylinositol dephosphorylation	32	3	0.00836596	OCRL,MTMR8,MTMR1	LUSC
BP	regulation of neurotransmitter secretion	90	4	0.0297346	FMR1,SYN1,SYP,CASK	LUSC
BP	regulation of mRNA splicing, via spliceosome	107	5	0.0150993	FMR1,RBMX,MBNL3,RBM3,RBM10	LUSC
BP	negative regulation of mRNA splicing, via spliceosome	23	2	0.0351933	RBMX,RBM10	LUSC
BP	spermatocyte division	2	1	0.0328243	TAFAZZIN	LUSC
BP	positive regulation of cellular process	5463	90	0.00763846	PQBP1,BCAP31,RRAGB,CDX4,MSL3,PIM2,MID2,WDR45,AMER1,DOCK11,MOSPD2,ZDHHC15,DKC1,DLG3,DMD,DUSP9,EDA,EFNB1,ELK1,ABCD1,ACSL4,FANCB,ABCB7,FGF13,PHF8,FLNA,FMR1,G6PD,TAB3,GDI1,RBMX,CCDC22,MCTS1,SLC25A5,PNMA3,UBQLN2,SH3KBP1,HCFC1,HPRT1,IL13RA1,IRAK1,AR,ARAF,MAOA,MECP2,FOXO4,MSN,MTCP1,PAK3,CDK16,ARMCX3,TAF9B,PLXNB3,ATP7A,GNL3L,ATRX,GDPD2,AVPR2,PLXNA3,OTUD5,ZC4H2,MOSPD1,PSMD10,MIR503,RAP2C,MID1IP1,RBM3,RPS6…	LUSC
BP	negative regulation of cellular process	4732	75	0.036725	ZBTB33,FMR1-AS1,CDX4,MAGED2,TMSB15A,PIM2,AMER1,ARX,DKC1,DLG3,DMD,TSC22D3,DUSP9,ABCD1,FANCB,ABCB7,FGF13,PHF8,FLNA,FMR1,G6PD,TAB3,GDI1,GLA,RBMX,CCDC22,SLC25A5,SNX12,UBQLN2,HCFC1,HMGB3,NEXMIF,AR,ARAF,ARHGAP4,MECP2,FOXO4,NONO,TAF9B,PLXNB3,ATP7A,GNL3L,POU3F4,ATRX,BCOR,RADX,AVPR2,PLXNA3,OTUD5,MTMR8,MBNL3,HDAC8,MOSPD1,PSMD10,MIR503,RAP2C,MID1IP1,RPL10,RPS6KA3,BCORL1,SCML1,TSPYL2,ZNF674,TAF1,TIMP1,TSPAN6…	LUSC
BP	neuron development	1098	21	0.0236037	PQBP1,SLC9A6,ZDHHC15,ARX,DMD,EFNB1,FGF13,FLNA,FMR1,GDI1,HPRT1,ARHGAP4,MECP2,OPHN1,PAK3,CDK16,PLXNB3,ATP7A,PLXNA3,ZC4H2,SYN1,CUL4B	LUSC
BP	cell morphogenesis involved in neuron differentiation	559	12	0.0255778	PQBP1,SLC9A6,ZDHHC15,ARX,EFNB1,FGF13,GDI1,HPRT1,ARHGAP4,OPHN1,PAK3,PLXNB3,PLXNA3	LUSC
BP	neuron projection morphogenesis	619	13	0.0246666	PQBP1,SLC9A6,ZDHHC15,ARX,EFNB1,FGF13,GDI1,HPRT1,ARHGAP4,OPHN1,PAK3,PLXNB3,ATP7A,PLXNA3	LUSC
BP	cell projection morphogenesis	640	13	0.0319111	PQBP1,SLC9A6,ZDHHC15,ARX,EFNB1,FGF13,GDI1,HPRT1,ARHGAP4,OPHN1,PAK3,PLXNB3,ATP7A,PLXNA3	LUSC
BP	regulation of mRNA processing	137	5	0.0378828	FMR1,RBMX,MBNL3,RBM3,RBM10	LUSC
BP	negative regulation of mRNA processing	25	2	0.0409451	RBMX,RBM10	LUSC
BP	regulation of axonogenesis	155	6	0.00777091	FGF13,GDI1,ARHGAP4,PAK3,PLXNB3,PLXNA3	LUSC
BP	negative regulation of axonogenesis	65	4	0.00592211	FGF13,GDI1,ARHGAP4,PLXNA3	LUSC
BP	regulation of cellular process	10499	155	0.0306596	ZBTB33,FMR1-AS1,PQBP1,BCAP31,RRAGB,CDX4,CETN2,ZNF275,MAGED2,MSL3,TMSB15A,PIM2,MID2,WDR45,CHM,COL4A5,COL4A6,DGKK,AMER1,GAB3,DOCK11,ZXDB,MOSPD2,ZDHHC15,SPIN3,ARX,DKC1,DLG3,DMD,TSC22D3,DUSP9,EDA,EFNB1,ELK1,ZNF449,ABCD1,ACSL4,FANCB,ABCB7,FGF13,PHF8,FLNA,FMR1,G6PD,BRWD3,GABRE,TAB3,IL1RAPL2,GDI1,GLA,RBMX,HTATSF1,CCDC22,MCTS1,SLC25A5,SNX12,PNMA3,UBQLN2,SH3KBP1,HCFC1,HMGB3,HNRNPH2,HPRT1,NEXMIF,BEX5,ZNF81…	LUSC
BP	synapse organization	426	10	0.0315787	COL4A5,ZDHHC15,FGF13,FLNA,IL1RAPL2,MECP2,OPHN1,PAK3,ZC4H2,SYN1	LUSC
BP	negative regulation of cellular component organization	696	15	0.0367165	TMSB15A,FGF13,PHF8,FLNA,GDI1,SLC25A5,UBQLN2,AR,ARHGAP4,PLXNB3,GNL3L,ATRX,PLXNA3,PSMD10,MID1IP1,VBP1	LUSC
BP	negative regulation of smooth muscle cell differentiation	22	2	0.0229232	MECP2,FOXO4	LUSC
BP	regulation of nitrogen compound metabolic process	5486	98	0.000710904	ZBTB33,PQBP1,BCAP31,CDX4,ZNF275,MAGED2,MSL3,PIM2,MID2,AMER1,ZXDB,SPIN3,ARX,DKC1,DLG3,DMD,TSC22D3,EDA,ELK1,ZNF449,FANCB,ABCB7,FGF13,PHF8,FLNA,FMR1,G6PD,BRWD3,GLA,RBMX,HTATSF1,CCDC22,SNX12,UBQLN2,HCFC1,HMGB3,HNRNPH2,HPRT1,ZNF81,IRAK1,AR,ARAF,MECP2,FOXO4,MSN,MTCP1,SPIN2B,NONO,OPHN1,PAK3,CDK16,ARMCX3,TAF9B,GNL3L,POU3F4,ATRX,BCOR,RADX,ZNF280C,KRBOX4,MBNL3,HDAC8,ZC4H2,MOSPD1,BEX4,PSMD10,MIR503,RAP2C,RB…	LUSC
BP	positive regulation of sulfur metabolic process	3	1	0.0440372	ABCB7	LUSC
BP	cytoplasmic sequestering of protein	22	2	0.031223	FLNA,CCDC22,PSMD10	LUSC
BP	regulation of RNA metabolic process	3554	69	0.000552925	ZBTB33,PQBP1,CDX4,ZNF275,MAGED2,MSL3,PIM2,MID2,ZXDB,SPIN3,ARX,DKC1,TSC22D3,EDA,ELK1,ZNF449,PHF8,FLNA,FMR1,BRWD3,RBMX,HTATSF1,CCDC22,HCFC1,HMGB3,HNRNPH2,ZNF81,IRAK1,AR,MECP2,FOXO4,SPIN2B,NONO,CDK16,ARMCX3,TAF9B,POU3F4,ATRX,BCOR,ZNF280C,KRBOX4,MBNL3,HDAC8,ZC4H2,MOSPD1,PSMD10,RAP2C,RBM3,RPL10,RPS6KA3,BCORL1,SCML1,ZNF674,SMARCA1,TAF1,TFE3,ZNF711,ZNF182,ZNF41,ZNF75D,HMGN5,NKAP,RBM10,PHF6,OGT,IKBKG,CAS…	LUSC
BP	negative regulation of RNA metabolic process	1349	26	0.0266052	ZBTB33,CDX4,MAGED2,ARX,DKC1,FLNA,FMR1,RBMX,HCFC1,AR,MECP2,NONO,TAF9B,ATRX,BCOR,HDAC8,MOSPD1,PSMD10,RPL10,BCORL1,SCML1,ZNF674,TAF1,NKAP,RBM10,PHF6,OGT,MAGED1	LUSC
BP	elastin biosynthetic process	2	1	0.034074	ATP7A	LUSC
BP	regulation of histone H3-K9 methylation	26	2	0.0425514	MECP2,ATRX	LUSC
BP	regulation of neurotransmitter transport	104	4	0.045075	FMR1,SYN1,SYP,CASK	LUSC
BP	copper ion homeostasis	19	2	0.0320681	CCDC22,ATP7A	LUSC
BP	copper ion export	2	1	0.0339965	ATP7A	LUSC
BP	apelin receptor signaling pathway	2	1	0.034357	APLN	LUSC
BP	regulation of macromolecule metabolic process	6279	102	0.0102092	ZBTB33,PQBP1,BCAP31,CDX4,ZNF275,MAGED2,MSL3,PIM2,MID2,AMER1,ZXDB,SPIN3,ARX,DKC1,DLG3,DMD,TSC22D3,EDA,ELK1,ZNF449,ABCD1,FANCB,FGF13,PHF8,FLNA,FMR1,G6PD,BRWD3,RBMX,HTATSF1,CCDC22,SNX12,UBQLN2,HCFC1,HMGB3,HNRNPH2,ZNF81,IRAK1,AR,ARAF,MECP2,FOXO4,MSN,MTCP1,SPIN2B,NONO,OPHN1,PAK3,CDK16,ARMCX3,TAF9B,ATP7A,POLA1,GNL3L,POU3F4,ATRX,BCOR,RADX,AVPR2,OTUD5,ZNF280C,KRBOX4,MBNL3,HDAC8,ZC4H2,MOSPD1,BEX4,PSMD10,M…	LUSC
BP	prostate induction	1	1	0.00678974	AR	LUSC
BP	prostate field specification	1	1	0.00678974	AR	LUSC
BP	activation of prostate induction by androgen receptor signaling pathway	1	1	0.00678974	AR	LUSC
BP	developmental growth involved in morphogenesis	230	6	0.0473911	SLC9A6,FGF13,GDI1,ARHGAP4,PLXNA3,MED12	LUSC
BP	lateral sprouting involved in mammary gland duct morphogenesis	2	1	0.0131329	AR	LUSC
BP	regulation of prostatic bud formation	6	1	0.0422974	AR	LUSC
BP	tertiary branching involved in mammary gland duct morphogenesis	3	1	0.027275	AR	LUSC
BP	positive regulation of epithelial cell proliferation involved in prostate gland development	3	1	0.0313327	AR	LUSC
BP	trachea submucosa development	2	1	0.0216752	EDA	LUSC
BP	trachea gland development	2	1	0.0216752	EDA	LUSC
BP	establishment of monopolar cell polarity	24	2	0.0371939	MSN,OPHN1	LUSC
BP	regulation of rDNA heterochromatin formation	2	1	0.0328631	PHF8	LUSC
BP	negative regulation of ribosomal DNA heterochromatin formation	2	1	0.0328631	PHF8	LUSC
BP	establishment or maintenance of bipolar cell polarity	55	3	0.03253	DLG3,MSN,OPHN1,PDZD11	LUSC
BP	establishment or maintenance of monopolar cell polarity	25	2	0.0391525	MSN,OPHN1	LUSC
BP	regulation of extent of cell growth	107	4	0.0322558	FGF13,GDI1,ARHGAP4,PLXNA3	LUSC
BP	axon development	486	11	0.0226206	SLC9A6,ARX,EFNB1,FGF13,FLNA,GDI1,ARHGAP4,OPHN1,PAK3,PLXNB3,PLXNA3	LUSC
BP	mitochondrion disassembly	92	4	0.0351793	WDR45,SLC25A5,FUNDC2,TAFAZZIN,OGT	LUSC
BP	protein targeting to lysosome involved in chaperone-mediated autophagy	3	1	0.0422179	LAMP2	LUSC
BP	process utilizing autophagic mechanism	545	15	0.00803786	RRAGB,PIM2,MID2,WDR45,ATG4A,TAB3,SLC25A5,UBQLN2,LAMP2,TBC1D25,CDK16,MTMR8,FUNDC2,TAFAZZIN,SRPX,OGT,IKBKG	LUSC
BP	articular cartilage development	3	1	0.0476971	BGN	LUSC
BP	specification of axis polarity	4	1	0.0452783	BCOR	LUSC
BP	negative regulation of tooth mineralization	2	1	0.0156447	BCOR	LUSC
BP	protein localization to chromosome, telomeric region	30	3	0.00985064	DKC1,GNL3L,ATRX	LUSC
BP	negative regulation of activation-induced cell death of T cells	3	1	0.0373215	TSC22D3	LUSC
BP	negative regulation of G0 to G1 transition	7	2	0.00405238	FOXO4,MIR503	LUSC
BP	positive regulation of heme biosynthetic process	3	1	0.0458215	ABCB7	LUSC
BP	T cell aggregation	2	1	0.0247374	MSN	LUSC
BP	protein targeting to vacuole involved in autophagy	4	1	0.0485359	LAMP2	LUSC
BP	cellular response to testosterone stimulus	10	3	0.00028909	ELK1,AR,MSN	LUSC
BP	semaphorin-plexin signaling pathway	44	3	0.0113094	FLNA,PLXNB3,PLXNA3	LUSC
BP	organism emergence from protective structure	25	2	0.0465472	BCOR,PHF6	LUSC
BP	cellular component organization or biogenesis	6274	99	0.038302	PQBP1,BCAP31,TIMM17B,SLC9A6,CETN2,UTP14A,MSL3,TMSB15A,WDR45,COL4A5,COL4A6,APOOL,DOCK11,ZDHHC15,TIMM8A,ARX,DIAPH2,DKC1,DMD,EFNB1,VMA21,ABCD1,ABCB7,FGF13,PHF8,SEPTIN6,FLNA,FMR1,KIF4A,CENPI,G6PD,BRWD3,IL1RAPL2,GDI1,RBMX,HTATSF1,MCTS1,SLC25A5,SNX12,UBQLN2,SH3KBP1,HCFC1,HMGB3,HPRT1,AR,KCND1,LAMP2,ARHGAP4,MECP2,MSN,NDUFA1,TBC1D25,OCRL,OPHN1,PAK3,PDZD11,CDK16,ARMCX3,TAF9B,RBMX2,PLXNB3,ATP6AP1,ATP7A,NDUF…	LUSC
BP	seminiferous tubule development	15	2	0.0196022	AR,ATRX	LUSC
BP	regulation of primary metabolic process	5643	100	0.000794358	ZBTB33,PQBP1,BCAP31,CDX4,ZNF275,MAGED2,MSL3,PIM2,MID2,AMER1,ZXDB,SPIN3,ARX,DKC1,DLG3,DMD,TSC22D3,EDA,ELK1,ZNF449,ABCD1,FANCB,FGF13,PHF8,FLNA,FMR1,G6PD,BRWD3,RBMX,HTATSF1,CCDC22,SNX12,UBQLN2,HCFC1,HMGB3,HNRNPH2,HPRT1,ZNF81,IRAK1,AR,ARAF,MECP2,FOXO4,MSN,MTCP1,SPIN2B,NONO,OPHN1,PAK3,CDK16,ARMCX3,TAF9B,GNL3L,POU3F4,ATRX,BCOR,RADX,ZNF280C,KRBOX4,MBNL3,HDAC8,ZC4H2,MOSPD1,BEX4,PSMD10,MIR503,RAP2C,MID1IP…	LUSC
BP	tubulin deacetylation	22	2	0.0415739	FLNA,BEX4	LUSC
BP	axis elongation involved in somitogenesis	4	1	0.0396613	MED12	LUSC
BP	nucleic acid metabolic process	5157	90	0.00352401	ZBTB33,PQBP1,CDX4,CETN2,UTP14A,ZNF275,MAGED2,MSL3,PIM2,MID2,CSTF2,ZXDB,SPIN3,ARX,DKC1,DNASE1L1,TSC22D3,EDA,ELK1,ZNF449,FANCB,PHF8,FLNA,FMR1,FTSJ1,BRWD3,SNORA70,SNORD61,RBMX,HTATSF1,CCDC22,HCFC1,HMGB3,HNRNPH2,ZNF81,IRAK1,AR,MECP2,FOXO4,SPIN2B,NONO,PAK3,CDK16,ARMCX3,TAF9B,RBMX2,POLA1,GNL3L,POU3F4,ATRX,BCOR,RADX,RBM41,ZNF280C,KRBOX4,MBNL3,HDAC8,ZC4H2,MOSPD1,PSMD10,RAP2C,RBM3,RPL10,RPS6KA3,BCORL1,SCM…	LUSC
BP	telomeric repeat-containing RNA transcription	1	1	0.0186847	ATRX	LUSC
BP	telomeric repeat-containing RNA transcription by RNA polymerase II	1	1	0.0186847	ATRX	LUSC
BP	nucleic acid-templated transcription	3366	63	0.00267149	ZBTB33,PQBP1,CDX4,ZNF275,MAGED2,MSL3,PIM2,MID2,ZXDB,SPIN3,ARX,TSC22D3,EDA,ELK1,ZNF449,PHF8,FLNA,BRWD3,RBMX,HTATSF1,CCDC22,HCFC1,HMGB3,ZNF81,IRAK1,AR,MECP2,FOXO4,SPIN2B,NONO,CDK16,ARMCX3,TAF9B,POU3F4,ATRX,BCOR,ZNF280C,KRBOX4,HDAC8,ZC4H2,MOSPD1,PSMD10,RAP2C,RPL10,RPS6KA3,BCORL1,SCML1,ZNF674,SMARCA1,TAF1,TFE3,ZNF711,ZNF182,ZNF41,ZNF75D,HMGN5,NKAP,RBM10,PHF6,OGT,IKBKG,CASK,APLN,MAGED1,MORF4L2,MED12	LUSC
BP	macromolecule deacylation	136	5	0.03746	MSL3,FLNA,HDAC8,BEX4,MORF4L2	LUSC
BP	regulation of action potential	61	3	0.0350859	FGF13,FLNA,FMR1	LUSC
BP	vesicle-mediated transport between endosomal compartments	45	3	0.0233209	FLNA,SNX12,MSN	LUSC
BP	maintenance of mitotic sister chromatid cohesion, telomeric	2	1	0.0281186	ATRX	LUSC
BP	mitotic sister chromatid cohesion, telomeric	2	1	0.0281186	ATRX	LUSC
BP	plasma membrane bounded cell projection morphogenesis	635	13	0.0299351	PQBP1,SLC9A6,ZDHHC15,ARX,EFNB1,FGF13,GDI1,HPRT1,ARHGAP4,OPHN1,PAK3,PLXNB3,ATP7A,PLXNA3	LUSC
BP	protein targeting to Golgi apparatus	1	1	0.0173226	ZDHHC15	LUSC
BP	iron-sulfur cluster export from the mitochondrion	1	1	0.0186186	ABCB7	LUSC
BP	regulation of histone H3-K9 trimethylation	12	2	0.0124183	MECP2,ATRX	LUSC
BP	positive regulation of cardiolipin metabolic process	2	1	0.0331864	TAFAZZIN	LUSC
BP	negative regulation of long-term synaptic depression	3	1	0.0319101	FMR1	LUSC
BP	regulation of intracellular transport of viral material	3	1	0.0398504	FMR1	LUSC
BP	positive regulation of intracellular transport of viral material	1	1	0.0156915	FMR1	LUSC
BP	thioester transport	2	1	0.0293041	ABCD1	LUSC
BP	organic cyclic compound metabolic process	6138	104	0.00413067	ZBTB33,PQBP1,CDX4,CETN2,UTP14A,ZNF275,PGRMC1,MAGED2,MSL3,PIM2,MID2,CSTF2,ZXDB,SPIN3,ARX,DKC1,DNASE1L1,TSC22D3,EDA,ELK1,ZNF449,ABCD1,ACSL4,FANCB,ABCB7,PHF8,FLNA,FMR1,ACOT9,FTSJ1,G6PD,BRWD3,SNORA70,SNORD61,RBMX,HTATSF1,CCDC22,HCFC1,HMGB3,HNRNPH2,HPRT1,ZNF81,IRAK1,AR,MAOA,MECP2,FOXO4,NDUFA1,SPIN2B,NONO,PAK3,NSDHL,CDK16,ARMCX3,TAF9B,RBMX2,ATP7A,POLA1,NDUFB11,GNL3L,POU3F4,ATRX,BCOR,RADX,RBM41,ZNF280C,…	LUSC
BP	organic cyclic compound biosynthetic process	4031	77	0.000562508	ZBTB33,PQBP1,CDX4,ZNF275,PGRMC1,MAGED2,MSL3,PIM2,MID2,ZXDB,SPIN3,ARX,DKC1,TSC22D3,EDA,ELK1,ZNF449,ACSL4,ABCB7,PHF8,FLNA,G6PD,BRWD3,RBMX,HTATSF1,CCDC22,HCFC1,HMGB3,HPRT1,ZNF81,IRAK1,AR,MECP2,FOXO4,NDUFA1,SPIN2B,NONO,PAK3,NSDHL,CDK16,ARMCX3,TAF9B,ATP7A,POLA1,NDUFB11,GNL3L,POU3F4,ATRX,BCOR,ZNF280C,KRBOX4,HDAC8,ZC4H2,MOSPD1,PRPS1,PSMD10,RAP2C,RPL10,RPS6KA3,BCORL1,SCML1,ZNF674,SMARCA1,TAF1,TAFAZZIN,TF…	LUSC
BP	positive regulation of tetrapyrrole biosynthetic process	3	1	0.0458215	ABCB7	LUSC
BP	organic substance biosynthetic process	5585	103	0.000225076	ZBTB33,PQBP1,CDX4,ZNF275,PGRMC1,MAGED2,MSL3,PIM2,MID2,WDR45,ZXDB,ZDHHC15,SPIN3,ARX,DKC1,DMD,TSC22D3,EDA,ELK1,ZNF449,ABCD1,ACSL4,ABCB7,PHF8,FLNA,FMR1,FTSJ1,G6PD,BRWD3,GK,RBMX,HTATSF1,CCDC22,MCTS1,C1GALT1C1,HCFC1,HMGB3,HPRT1,ZNF81,IRAK1,AR,MECP2,FOXO4,NDUFA1,SPIN2B,NONO,OCRL,PAK3,NSDHL,ZDHHC9,CDK16,ARMCX3,TAF9B,ATP7A,POLA1,NDUFB11,GNL3L,POU3F4,ATRX,BCOR,TMLHE,ZNF280C,KRBOX4,HDAC8,ZC4H2,MOSPD1,PRPS1…	LUSC
BP	regulation of telomeric RNA transcription from RNA pol II promoter	1	1	0.0186847	ATRX	LUSC
BP	negative regulation of telomeric RNA transcription from RNA pol II promoter	1	1	0.0186847	ATRX	LUSC
BP	positive regulation of telomeric RNA transcription from RNA pol II promoter	1	1	0.0186847	ATRX	LUSC
BP	cellular response to ketone	98	4	0.0326805	ELK1,AR,MSN,AIFM1	LUSC
BP	nucleotide transmembrane transport	20	2	0.0371691	SLC25A5,SLC25A53	LUSC
BP	semaphorin-plexin signaling pathway involved in neuron projection guidance	16	2	0.00942403	PLXNB3,PLXNA3	LUSC
BP	semaphorin-plexin signaling pathway involved in axon guidance	14	2	0.00657894	PLXNB3,PLXNA3	LUSC
BP	iron-sulfur cluster transmembrane transport	1	1	0.0186186	ABCB7	LUSC
BP	organelle disassembly	137	5	0.0440021	WDR45,MCTS1,SLC25A5,FUNDC2,TAFAZZIN,OGT	LUSC
BP	regulation of proteolysis involved in protein catabolic process	222	7	0.0366318	BCAP31,FMR1,CCDC22,UBQLN2,ARAF,OPHN1,PSMD10,TAF1,OGT	LUSC
BP	positive regulation of proteolysis involved in protein catabolic process	135	5	0.0385872	BCAP31,FMR1,CCDC22,UBQLN2,PSMD10,TAF1	LUSC
BP	regulation of ER-associated ubiquitin-dependent protein catabolic process	9	2	0.00646246	BCAP31,UBQLN2	LUSC
BP	positive regulation of ER-associated ubiquitin-dependent protein catabolic process	7	2	0.00339522	BCAP31,UBQLN2	LUSC
BP	regulation of iron-sulfur cluster assembly	1	1	0.0186186	ABCB7	LUSC
BP	positive regulation of iron-sulfur cluster assembly	1	1	0.0186186	ABCB7	LUSC
BP	negative regulation of reactive oxygen species biosynthetic process	20	2	0.027115	ABCD1,ABCB7	LUSC
BP	regulation of nucleic acid-templated transcription	3256	63	0.00108201	ZBTB33,PQBP1,CDX4,ZNF275,MAGED2,MSL3,PIM2,MID2,ZXDB,SPIN3,ARX,TSC22D3,EDA,ELK1,ZNF449,PHF8,FLNA,BRWD3,RBMX,HTATSF1,CCDC22,HCFC1,HMGB3,ZNF81,IRAK1,AR,MECP2,FOXO4,SPIN2B,NONO,CDK16,ARMCX3,TAF9B,POU3F4,ATRX,BCOR,ZNF280C,KRBOX4,HDAC8,ZC4H2,MOSPD1,PSMD10,RAP2C,RPL10,RPS6KA3,BCORL1,SCML1,ZNF674,SMARCA1,TAF1,TFE3,ZNF711,ZNF182,ZNF41,ZNF75D,HMGN5,NKAP,RBM10,PHF6,OGT,IKBKG,CASK,APLN,MAGED1,MORF4L2,MED12	LUSC
BP	negative regulation of nucleic acid-templated transcription	1241	23	0.049427	ZBTB33,CDX4,MAGED2,ARX,FLNA,HCFC1,AR,MECP2,NONO,TAF9B,ATRX,BCOR,HDAC8,MOSPD1,PSMD10,RPL10,BCORL1,SCML1,ZNF674,TAF1,NKAP,RBM10,PHF6,OGT,MAGED1	LUSC
BP	regulation of cytoplasmic transport	28	2	0.0498183	SNX12,MSN	LUSC
BP	regulation of G protein-coupled receptor internalization	3	2	0.000871574	UBQLN2,APLN	LUSC
BP	negative regulation of G protein-coupled receptor internalization	2	1	0.034685	UBQLN2	LUSC
BP	positive regulation of G protein-coupled receptor internalization	1	1	0.0165328	APLN	LUSC
BP	positive regulation of retrograde protein transport, ER to cytosol	3	1	0.0443201	BCAP31	LUSC
BP	positive regulation of TORC1 signaling	23	2	0.0337916	RRAGB,OTUD5	LUSC
BP	regulation of ERAD pathway	20	2	0.0284668	BCAP31,UBQLN2	LUSC
BP	positive regulation of ERAD pathway	14	2	0.0124181	BCAP31,UBQLN2	LUSC
BP	negative regulation of vascular associated smooth muscle cell proliferation	42	3	0.015241	MIR503,RBM10,APLN	LUSC
BP	regulation of protein localization to chromosome, telomeric region	14	2	0.0212312	DKC1,GNL3L	LUSC
BP	positive regulation of protein localization to chromosome, telomeric region	12	2	0.0167709	DKC1,GNL3L	LUSC
BP	regulation of maintenance of mitotic sister chromatid cohesion, telomeric	2	1	0.0281186	ATRX	LUSC
BP	negative regulation of maintenance of mitotic sister chromatid cohesion, telomeric	2	1	0.0281186	ATRX	LUSC
BP	regulation of membrane repolarization during atrial cardiac muscle cell action potential	2	1	0.0186955	FLNA	LUSC
BP	positive regulation of DNA methylation	4	1	0.0432186	MECP2	LUSC
BP	embryonic brain development	16	2	0.0212359	RPL10,MED12	LUSC
BP	mitochondrial transmembrane transport	86	4	0.043271	TIMM17B,ABCB7,SLC25A5,SLC25A53,AIFM1	LUSC
BP	response to water-immersion restraint stress	2	1	0.0247075	FOXO4	LUSC
BP	negative regulation of double-strand break repair via homologous recombination	18	2	0.0302358	FANCB,RADX	LUSC
BP	regulation of synaptic vesicle exocytosis	59	4	0.00735468	FMR1,SYN1,SYP,CASK	LUSC
BP	positive regulation of T cell extravasation	3	1	0.0400397	CD99L2	LUSC
BP	regulation of opioid receptor signaling pathway	3	1	0.0364423	SYP	LUSC
BP	regulation of early endosome to late endosome transport	18	2	0.0250203	SNX12,MSN	LUSC
BP	negative regulation of early endosome to late endosome transport	2	1	0.0356835	SNX12	LUSC
BP	negative regulation of transcription from RNA polymerase II promoter involved in smooth muscle cell differentiation	3	1	0.0373538	MECP2	LUSC
BP	regulation of RNA biosynthetic process	3265	63	0.00117833	ZBTB33,PQBP1,CDX4,ZNF275,MAGED2,MSL3,PIM2,MID2,ZXDB,SPIN3,ARX,TSC22D3,EDA,ELK1,ZNF449,PHF8,FLNA,BRWD3,RBMX,HTATSF1,CCDC22,HCFC1,HMGB3,ZNF81,IRAK1,AR,MECP2,FOXO4,SPIN2B,NONO,CDK16,ARMCX3,TAF9B,POU3F4,ATRX,BCOR,ZNF280C,KRBOX4,HDAC8,ZC4H2,MOSPD1,PSMD10,RAP2C,RPL10,RPS6KA3,BCORL1,SCML1,ZNF674,SMARCA1,TAF1,TFE3,ZNF711,ZNF182,ZNF41,ZNF75D,HMGN5,NKAP,RBM10,PHF6,OGT,IKBKG,CASK,APLN,MAGED1,MORF4L2,MED12	LUSC
BP	negative regulation of chloride transport	3	1	0.0381019	GABRE	LUSC
BP	negative regulation of transcription by RNA polymerase II	926	11	0.021309	MAGED2,NR0B1,MAGEH1,AR,BCOR,MOSPD1,MAGEE1,RPL10,SOX3,TAF1,ESX1,MAGED1	COAD
BP	regulation of histone H3-K36 methylation	7	1	0.0399808	BCOR	COAD
BP	negative regulation of histone H3-K36 methylation	1	1	0.0043591	BCOR	COAD
BP	cell morphogenesis	1005	13	0.00537322	SLITRK4,ZDHHC15,EFNB1,NRK,FGF13,FLNA,AR,L1CAM,MCF2,PAK3,NLGN3,GPRASP3,SLITRK2	COAD
BP	cell morphogenesis involved in differentiation	717	12	0.000865142	SLITRK4,ZDHHC15,EFNB1,FGF13,FLNA,AR,L1CAM,MCF2,PAK3,NLGN3,GPRASP3,SLITRK2	COAD
BP	postsynaptic membrane organization	36	2	0.0190921	NLGN3,CHRDL1	COAD
BP	negative regulation of cell-matrix adhesion	40	2	0.0198061	NEXMIF,ARHGAP6	COAD
BP	wound healing involved in inflammatory response	9	1	0.0459982	TIMP1	COAD
BP	connective tissue replacement involved in inflammatory response wound healing	7	1	0.0362107	TIMP1	COAD
BP	noradrenergic neuron development	5	1	0.0292203	ZC4H2	COAD
BP	regulation of transcription by RNA polymerase II	2466	22	0.0333009	MAGED2,ZXDB,TSC22D3,NR0B1,ZNF449,HTATSF1,MAGEH1,ZNF81,AR,FOXO4,ARMCX3,POU3F4,BCOR,MOSPD1,MAGEE1,RPL10,SOX3,TAF1,TFE3,ZIC3,ZNF41,ZNF75D,ESX1,MAGED1	COAD
BP	transcription by RNA polymerase II	2549	22	0.0464213	MAGED2,ZXDB,TSC22D3,NR0B1,ZNF449,HTATSF1,MAGEH1,ZNF81,AR,FOXO4,ARMCX3,POU3F4,BCOR,MOSPD1,MAGEE1,RPL10,SOX3,TAF1,TFE3,ZIC3,ZNF41,ZNF75D,ESX1,MAGED1	COAD
BP	glutamate biosynthetic process	5	1	0.0283147	GLUD1,GLUD2	COAD
BP	glutamate catabolic process	8	1	0.0438848	GLUD1,GLUD2	COAD
BP	amino-acid betaine biosynthetic process	6	1	0.0379717	TMLHE	COAD
BP	calcium ion transport	434	6	0.0403986	CLIC2,FLNA,FMR1,NALF2,HTR2C,WNK3,CACNA1F	COAD
BP	striated muscle contraction	177	4	0.0185643	CLIC2,FGF13,FLNA,KCNE5	COAD
BP	microtubule depolymerization	45	2	0.0291342	FGF13,MID1	COAD
BP	negative regulation of microtubule depolymerization	27	2	0.0103665	FGF13,MID1	COAD
BP	signal transduction	5653	41	0.0421624	RRAGB,MID2,CLIC2,ASB9,NR0B1,EFNB1,NRK,FGF13,CNKSR2,FLNA,ARHGEF9,FMR1,LDOC1,IL1RAPL2,SRPK3,PCSK1N,GLRA2,GRIA3,HTR2C,IL13RA1,AR,USP27X,ARHGAP6,MCF2,MID1,FOXO4,MPP1,PAK3,NSDHL,PLP2,NLGN3,WNK3,TAF1,TIMP1,ZIC3,GPR101,CHRDL1,GPR50,RAB33A,MAGED1,GPRASP1,STARD8	COAD
BP	adenylate cyclase-inhibiting dopamine receptor signaling pathway	6	1	0.0348716	FLNA	COAD
BP	phospholipase C-activating serotonin receptor signaling pathway	3	1	0.0153161	HTR2C	COAD
BP	osmosensory signaling pathway	6	1	0.0347542	WNK3	COAD
BP	nervous system development	2453	25	0.00340315	SLITRK4,ZDHHC15,TIMM8A,NR0B1,EFNB1,NRK,FGF13,FLNA,ARHGEF9,FMR1,IL1RAPL2,GLUD1,NEXMIF,L1CAM,MCF2,PAK3,NLGN3,POU3F4,ZC4H2,PCDH19,SOX3,SYN1,TAF1,ZIC3,GPRASP3,SLITRK2,CHRDL1	COAD
BP	axonogenesis	436	8	0.00352293	SLITRK4,EFNB1,FGF13,L1CAM,MCF2,PAK3,NLGN3,SLITRK2	COAD
BP	synapse assembly	181	7	7.97e-05	SLITRK4,FGF13,ARHGEF9,IL1RAPL2,NLGN3,GPRASP3,SLITRK2	COAD
BP	sex determination	21	3	0.000262293	NR0B1,AR,SOX3	COAD
BP	female pregnancy	175	4	0.0194523	MAGED2,LDOC1,AR,TIMP1	COAD
BP	blood coagulation, intrinsic pathway	9	1	0.0478647	FLNA	COAD
BP	ultradian rhythm	2	1	0.0113644	ENOX2	COAD
BP	regulation of heart contraction	211	4	0.0321164	CLIC2,FGF13,FLNA,KCNE5	COAD
BP	axis specification	95	3	0.0172509	BCOR,ZIC3,CHRDL1	COAD
BP	embryonic pattern specification	74	3	0.00895718	EFNB1,ZIC3,CHRDL1	COAD
BP	regulation of phosphatidylinositol biosynthetic process	5	1	0.0244258	HTR2C	COAD
BP	positive regulation of phosphatidylinositol biosynthetic process	3	1	0.0153161	HTR2C	COAD
BP	regulation of cell morphogenesis involved in differentiation	97	3	0.0185175	FLNA,PAK3,GPRASP3	COAD
BP	positive regulation of cell morphogenesis involved in differentiation	81	3	0.0113769	FLNA,PAK3,GPRASP3	COAD
BP	regulation of cell-substrate adhesion	219	4	0.037188	FLNA,EGFL6,NEXMIF,ARHGAP6	COAD
BP	negative regulation of cell-substrate adhesion	64	2	0.049522	NEXMIF,ARHGAP6	COAD
BP	regulation of neuron projection development	442	7	0.0144557	ZDHHC15,FGF13,FLNA,L1CAM,MCF2,PAK3,GPRASP3	COAD
BP	positive regulation of neuron projection development	155	4	0.0131929	ZDHHC15,FLNA,PAK3,GPRASP3	COAD
BP	negative regulation of neuron projection development	142	3	0.0495625	FGF13,FLNA,MCF2	COAD
BP	nucleobase-containing compound transport	214	4	0.0427534	CETN2,FMR1,SLC25A53,NXT2,UPF3B	COAD
BP	diadenosine polyphosphate metabolic process	8	1	0.0373607	NUDT10	COAD
BP	diadenosine polyphosphate catabolic process	6	1	0.0254942	NUDT10	COAD
BP	dendrite development	233	4	0.0464697	ZDHHC15,FMR1,MCF2,PAK3,GPRASP3	COAD
BP	negative regulation of transcription by RNA polymerase I	8	1	0.0469279	FLNA	COAD
BP	somatic sex determination	2	1	0.0115079	AR	COAD
BP	male somatic sex determination	1	1	0.00458329	AR	COAD
BP	regulation of nucleobase-containing compound metabolic process	3871	31	0.0462557	MAGED2,MSL3,MID2,ZXDB,TSC22D3,NR0B1,ZNF449,FLNA,FMR1,SRPK3,HTATSF1,MAGEH1,HNRNPH2,ZNF81,AR,FOXO4,PAK3,ARMCX3,SHLD2,POU3F4,BCOR,ZC4H2,MOSPD1,MAGEE1,RPL10,SOX3,TAF1,TFE3,ZIC3,ZNF41,ZNF75D,ESX1,FAM50A,MAGED1	COAD
BP	limbic system development	111	4	0.00400839	NR0B1,FGF13,SOX3,ZIC3	COAD
BP	hypothalamus development	25	2	0.0105303	NR0B1,SOX3	COAD
BP	pituitary gland development	41	2	0.0238634	NR0B1,SOX3	COAD
BP	neurogenesis	1652	17	0.0146338	SLITRK4,ZDHHC15,EFNB1,NRK,FGF13,FLNA,FMR1,NEXMIF,L1CAM,MCF2,PAK3,NLGN3,ZC4H2,SOX3,SYN1,ZIC3,GPRASP3,SLITRK2	COAD
BP	regulation of anatomical structure morphogenesis	970	10	0.049122	ZDHHC15,FGF13,FLNA,AR,L1CAM,MCF2,FOXO4,PAK3,GPRASP3,MAGED1	COAD
BP	regulation of transmembrane transporter activity	284	5	0.0254064	CLIC2,FGF13,FMR1,KCNE5,NLGN3,WNK3	COAD
BP	actin filament-based movement	133	3	0.037602	FGF13,FLNA,KCNE5	COAD
BP	neuron differentiation	1365	16	0.0055152	SLITRK4,ZDHHC15,EFNB1,NRK,FGF13,FLNA,FMR1,L1CAM,MCF2,PAK3,NLGN3,ZC4H2,SOX3,SYN1,ZIC3,GPRASP3,SLITRK2	COAD
BP	male sex determination	13	2	0.00274191	NR0B1,AR	COAD
BP	germ-line stem cell population maintenance	4	1	0.0256874	ZIC3	COAD
BP	negative regulation of microtubule polymerization or depolymerization	39	2	0.021356	FGF13,MID1	COAD
BP	regulation of microtubule depolymerization	31	2	0.0139329	FGF13,MID1	COAD
BP	neuron projection development	953	12	0.00925604	SLITRK4,ZDHHC15,EFNB1,NRK,FGF13,FLNA,FMR1,L1CAM,MCF2,PAK3,NLGN3,GPRASP3,SLITRK2	COAD
BP	actin cytoskeleton reorganization	111	3	0.02598	NRK,FLNA,GDPD2	COAD
BP	regulation of transporter activity	316	5	0.0357704	CLIC2,FGF13,FMR1,KCNE5,NLGN3,WNK3	COAD
BP	regulation of ion transmembrane transporter activity	274	5	0.0221515	CLIC2,FGF13,FMR1,KCNE5,NLGN3,WNK3	COAD
BP	cellular component morphogenesis	761	11	0.00445998	SLITRK4,ZDHHC15,EFNB1,NRK,FGF13,L1CAM,MCF2,PAK3,NLGN3,GPRASP3,SLITRK2	COAD
BP	cell part morphogenesis	659	11	0.00145749	SLITRK4,ZDHHC15,EFNB1,NRK,FGF13,L1CAM,MCF2,PAK3,NLGN3,GPRASP3,SLITRK2	COAD
BP	Leydig cell differentiation	12	2	0.0022818	NR0B1,AR	COAD
BP	ion transmembrane transport	1137	12	0.0354703	CLIC2,FGF13,FLNA,FMR1,KCNE5,NALF2,GLRA2,GRIA3,HTR2C,PLP2,NLGN3,WNK3,CACNA1F	COAD
BP	cell junction assembly	422	8	0.00296479	SLITRK4,FGF13,ARHGEF9,IL1RAPL2,ARHGAP6,NLGN3,GPRASP3,SLITRK2	COAD
BP	cell junction organization	693	17	4.44e-07	SLITRK4,ZDHHC15,FGF13,CNKSR2,FLNA,ARHGEF9,IL1RAPL2,L1CAM,ARHGAP6,PAK3,NLGN3,ZC4H2,SYN1,GPRASP3,SLITRK2,CHRDL1,FRMPD4	COAD
BP	regulation of ion transmembrane transport	509	7	0.0282764	CLIC2,FGF13,FLNA,FMR1,KCNE5,NLGN3,WNK3,CACNA1F	COAD
BP	positive regulation of ion transmembrane transport	184	4	0.0241289	FLNA,KCNE5,NLGN3,WNK3	COAD
BP	central nervous system segmentation	4	1	0.0229628	ZIC3	COAD
BP	NAD transmembrane transport	4	1	0.0234134	SLC25A53	COAD
BP	protein localization to microtubule	19	2	0.00588137	MID2,MID1	COAD
BP	determination of pancreatic left/right asymmetry	5	1	0.0293096	ZIC3	COAD
BP	determination of left/right asymmetry in nervous system	2	1	0.0128466	ZIC3	COAD
BP	response to immobilization stress	21	2	0.00644749	NR0B1,FOXO4	COAD
BP	oncostatin-M-mediated signaling pathway	6	1	0.038084	IL13RA1	COAD
BP	regulation of membrane potential	429	6	0.0412158	FGF13,FLNA,FMR1,KCNE5,GLRA2,GRIA3,NLGN3	COAD
BP	outer ear morphogenesis	8	1	0.0463813	ZIC3	COAD
BP	receptor clustering	57	3	0.00426251	DLG3,FLNA,CHRDL1	COAD
BP	NAD transport	5	1	0.0301423	SLC25A53	COAD
BP	regulation of potassium ion transport	112	3	0.0253581	FLNA,KCNE5,WNK3	COAD
BP	positive regulation of potassium ion transport	51	3	0.00328971	FLNA,KCNE5,WNK3	COAD
BP	corticotropin-releasing hormone secretion	2	1	0.0126584	HTR2C	COAD
BP	regulation of corticotropin-releasing hormone secretion	2	1	0.0126584	HTR2C	COAD
BP	protein localization to cytoskeleton	58	2	0.0485277	MID2,MID1	COAD
BP	multi-organism reproductive process	195	4	0.0272507	MAGED2,LDOC1,AR,TIMP1	COAD
BP	multi-multicellular organism process	204	4	0.0313787	MAGED2,LDOC1,AR,TIMP1	COAD
BP	integrin biosynthetic process	6	1	0.0319155	AR	COAD
BP	regulation of integrin biosynthetic process	5	1	0.0276666	AR	COAD
BP	establishment or maintenance of neuroblast polarity	3	1	0.0182878	FGF13	COAD
BP	establishment of neuroblast polarity	3	1	0.0182878	FGF13	COAD
BP	carnitine biosynthetic process	4	1	0.0247947	TMLHE	COAD
BP	negative regulation of integrin biosynthetic process	2	1	0.0115125	AR	COAD
BP	positive regulation of integrin biosynthetic process	3	1	0.0139586	AR	COAD
BP	ephrin receptor signaling pathway	52	2	0.032748	EFNB1,PAK3	COAD
BP	neuron development	1098	14	0.00441142	SLITRK4,ZDHHC15,EFNB1,NRK,FGF13,FLNA,FMR1,L1CAM,MCF2,PAK3,NLGN3,ZC4H2,SYN1,GPRASP3,SLITRK2	COAD
BP	cell morphogenesis involved in neuron differentiation	559	10	0.00141081	SLITRK4,ZDHHC15,EFNB1,FGF13,L1CAM,MCF2,PAK3,NLGN3,GPRASP3,SLITRK2	COAD
BP	generation of neurons	1436	17	0.0037876	SLITRK4,ZDHHC15,EFNB1,NRK,FGF13,FLNA,FMR1,NEXMIF,L1CAM,MCF2,PAK3,NLGN3,ZC4H2,SOX3,SYN1,ZIC3,GPRASP3,SLITRK2	COAD
BP	male genitalia morphogenesis	4	1	0.0214421	AR	COAD
BP	neuron projection morphogenesis	619	11	0.000853026	SLITRK4,ZDHHC15,EFNB1,NRK,FGF13,L1CAM,MCF2,PAK3,NLGN3,GPRASP3,SLITRK2	COAD
BP	dendrite morphogenesis	138	3	0.045744	ZDHHC15,PAK3,GPRASP3	COAD
BP	cell projection morphogenesis	640	11	0.00112899	SLITRK4,ZDHHC15,EFNB1,NRK,FGF13,L1CAM,MCF2,PAK3,NLGN3,GPRASP3,SLITRK2	COAD
BP	leukemia inhibitory factor signaling pathway	8	1	0.0491602	IL13RA1	COAD
BP	regulation of axonogenesis	155	4	0.0122721	FGF13,L1CAM,MCF2,PAK3	COAD
BP	regulation of dendrite development	102	3	0.0217234	ZDHHC15,PAK3,GPRASP3	COAD
BP	positive regulation of dendrite morphogenesis	35	2	0.0175981	PAK3,GPRASP3	COAD
BP	regulation of biological process	11376	80	0.00316623	FMR1-AS1,RRAGB,CETN2,MAGED2,MSL3,MID2,CLIC2,SLITRK4,ASB9,ZXDB,ZDHHC15,DLG3,TSC22D3,NR0B1,EFNB1,NRK,ZNF449,FGF13,CNKSR2,FLNA,ARHGEF9,FMR1,KCNE5,LDOC1,EGFL6,IL1RAPL2,SRPK3,GLA,HTATSF1,PCSK1N,GLRA2,GLUD1,GRIA3,MAGEH1,HNRNPH2,HTR2C,NEXMIF,ZNF81,IL13RA1,AR,L1CAM,USP27X,ARHGAP6,MCF2,MID1,FOXO4,MPP1,PAK3,NSDHL,ARMCX3,PLP2,NLGN3,SHLD2,POU3F4,GDPD2,BCOR,MTMR8,ZC4H2,MOSPD1,MAGEE1,RPL10,WDR13,UPF3B,WNK3,SOX…	COAD
BP	regulation of cellular process	10547	80	0.000207802	FMR1-AS1,RRAGB,CETN2,MAGED2,MSL3,MID2,CLIC2,SLITRK4,ASB9,ZXDB,ZDHHC15,DLG3,TSC22D3,NR0B1,EFNB1,NRK,ZNF449,FGF13,CNKSR2,FLNA,ARHGEF9,FMR1,KCNE5,LDOC1,EGFL6,IL1RAPL2,SRPK3,GLA,HTATSF1,PCSK1N,GLRA2,GLUD1,GRIA3,MAGEH1,HNRNPH2,HTR2C,NEXMIF,ZNF81,IL13RA1,AR,L1CAM,USP27X,ARHGAP6,MCF2,MID1,FOXO4,MPP1,PAK3,NSDHL,ARMCX3,PLP2,NLGN3,SHLD2,POU3F4,GDPD2,BCOR,MTMR8,ZC4H2,MOSPD1,MAGEE1,RPL10,WDR13,UPF3B,WNK3,SOX…	COAD
BP	regulation of synapse structure or activity	213	8	3.24e-05	SLITRK4,ZDHHC15,IL1RAPL2,PAK3,NLGN3,GPRASP3,SLITRK2,FRMPD4	COAD
BP	regulation of synapse organization	207	8	2.61e-05	SLITRK4,ZDHHC15,IL1RAPL2,PAK3,NLGN3,GPRASP3,SLITRK2,FRMPD4	COAD
BP	synapse organization	426	16	2.75e-09	SLITRK4,ZDHHC15,FGF13,CNKSR2,FLNA,ARHGEF9,IL1RAPL2,L1CAM,PAK3,NLGN3,ZC4H2,SYN1,GPRASP3,SLITRK2,CHRDL1,FRMPD4	COAD
BP	mRNA transport	122	3	0.0392705	CETN2,FMR1,NXT2,UPF3B	COAD
BP	negative regulation of membrane protein ectodomain proteolysis	8	1	0.0434968	TIMP1	COAD
BP	regulation of DNA-binding transcription factor activity	443	6	0.0443859	MID2,NR0B1,FLNA,AR,ZC4H2,TAF1,ZIC3	COAD
BP	positive regulation of developmental process	1362	15	0.0112017	SLITRK4,ZDHHC15,FLNA,FMR1,HTR2C,AR,L1CAM,PAK3,NLGN3,SHLD2,GDPD2,ZC4H2,TFE3,GPRASP3,SLITRK2,MAGED1	COAD
BP	sequestering of calcium ion	130	3	0.0387072	CLIC2,FLNA,HTR2C	COAD
BP	release of sequestered calcium ion into cytosol	123	3	0.0330385	CLIC2,FLNA,HTR2C	COAD
BP	regulation of RNA metabolic process	3559	29	0.0427328	MAGED2,MSL3,MID2,ZXDB,TSC22D3,NR0B1,ZNF449,FLNA,FMR1,SRPK3,HTATSF1,MAGEH1,HNRNPH2,ZNF81,AR,FOXO4,ARMCX3,POU3F4,BCOR,ZC4H2,MOSPD1,MAGEE1,RPL10,SOX3,TAF1,TFE3,ZIC3,ZNF41,ZNF75D,ESX1,FAM50A,MAGED1	COAD
BP	regulation of sequestering of calcium ion	126	3	0.0353201	CLIC2,FLNA,HTR2C	COAD
BP	negative regulation of sequestering of calcium ion	124	3	0.033876	CLIC2,FLNA,HTR2C	COAD
BP	negative regulation of histone H3-K4 methylation	6	1	0.0363678	BCOR	COAD
BP	localization within membrane	656	8	0.044514	ZDHHC15,TIMM8A,DLG3,FGF13,FLNA,AR,WNK3,CHRDL1	COAD
BP	regulation of synapse structural plasticity	7	1	0.0381489	FRMPD4	COAD
BP	positive regulation of synapse structural plasticity	3	1	0.017906	FRMPD4	COAD
BP	regulation of nervous system development	454	8	0.004945	SLITRK4,FGF13,L1CAM,MCF2,PAK3,NLGN3,GPRASP3,SLITRK2	COAD
BP	positive regulation of nervous system development	277	6	0.00546286	SLITRK4,L1CAM,PAK3,NLGN3,GPRASP3,SLITRK2	COAD
BP	regulation of synapse assembly	103	5	0.000288301	SLITRK4,IL1RAPL2,NLGN3,GPRASP3,SLITRK2	COAD
BP	positive regulation of synapse assembly	62	4	0.000377807	SLITRK4,NLGN3,GPRASP3,SLITRK2	COAD
BP	asymmetric neuroblast division	6	1	0.0340006	FGF13	COAD
BP	synaptic transmission, glycinergic	6	1	0.033639	GLRA2	COAD
BP	rhythmic synaptic transmission	3	1	0.0195371	NLGN3	COAD
BP	cardiac muscle contraction	139	4	0.0079834	CLIC2,FGF13,FLNA,KCNE5	COAD
BP	maternal process involved in female pregnancy	60	2	0.0475491	LDOC1,AR	COAD
BP	maternal process involved in parturition	6	1	0.0383277	LDOC1	COAD
BP	regulation of membrane repolarization	37	2	0.0176408	FLNA,KCNE5	COAD
BP	face development	50	2	0.0340145	SOX3,ZIC3	COAD
BP	regulation of atrial cardiac muscle cell membrane repolarization	8	2	0.000818079	FLNA,KCNE5	COAD
BP	prostatic bud formation	9	1	0.0485788	AR	COAD
BP	prostate induction	1	1	0.00458329	AR	COAD
BP	prostate field specification	1	1	0.00458329	AR	COAD
BP	activation of prostate induction by androgen receptor signaling pathway	1	1	0.00458329	AR	COAD
BP	lateral sprouting involved in mammary gland duct morphogenesis	2	1	0.0089722	AR	COAD
BP	regulation of prostatic bud formation	6	1	0.028543	AR	COAD
BP	regulation of morphogenesis of a branching structure	51	2	0.033004	AR,MAGED1	COAD
BP	mammary gland branching involved in pregnancy	7	1	0.037999	AR	COAD
BP	tertiary branching involved in mammary gland duct morphogenesis	3	1	0.0165571	AR	COAD
BP	positive regulation of epithelial cell proliferation involved in prostate gland development	3	1	0.0160766	AR	COAD
BP	dendritic spine development	88	3	0.0140754	ZDHHC15,FMR1,PAK3,GPRASP3	COAD
BP	dendritic spine morphogenesis	56	3	0.00400518	ZDHHC15,PAK3,GPRASP3	COAD
BP	regulation of dendritic spine development	53	2	0.0368149	FMR1,PAK3,GPRASP3	COAD
BP	positive regulation of dendritic spine development	35	2	0.0175837	FMR1,PAK3,GPRASP3	COAD
BP	regulation of dendritic spine morphogenesis	42	3	0.0018727	ZDHHC15,PAK3,GPRASP3	COAD
BP	positive regulation of dendritic spine morphogenesis	18	2	0.00492464	PAK3,GPRASP3	COAD
BP	axon development	486	9	0.00187002	SLITRK4,EFNB1,FGF13,FLNA,L1CAM,MCF2,PAK3,NLGN3,SLITRK2	COAD
BP	specification of axis polarity	4	1	0.0224951	BCOR	COAD
BP	biological regulation	12067	82	0.00866597	FMR1-AS1,RRAGB,CETN2,MAGED2,MSL3,MID2,GPRASP2,CLIC2,SLITRK4,ASB9,ZXDB,ZDHHC15,PABIR3,DLG3,TSC22D3,NR0B1,EFNB1,NRK,ZNF449,FGF13,CNKSR2,FLNA,ARHGEF9,FMR1,KCNE5,LDOC1,EGFL6,IL1RAPL2,SRPK3,GLA,HTATSF1,PCSK1N,GLRA2,GLUD1,GRIA3,MAGEH1,HNRNPH2,HTR2C,NEXMIF,ZNF81,IL13RA1,AR,L1CAM,USP27X,ARHGAP6,MCF2,MID1,FOXO4,MPP1,PAK3,NSDHL,ARMCX3,PLP2,NLGN3,SHLD2,POU3F4,GDPD2,BCOR,MTMR8,ZC4H2,MOSPD1,MAGEE1,RPL10,WDR13…	COAD
BP	negative regulation of tooth mineralization	2	1	0.00760537	BCOR	COAD
BP	regulation of activation-induced cell death of T cells	4	1	0.0252611	TSC22D3	COAD
BP	negative regulation of activation-induced cell death of T cells	3	1	0.0185006	TSC22D3	COAD
BP	actin-mediated cell contraction	103	3	0.0193789	FGF13,FLNA,KCNE5	COAD
BP	negative regulation of G0 to G1 transition	7	1	0.0412022	FOXO4	COAD
BP	calcium ion transmembrane transport	340	5	0.0482929	CLIC2,FLNA,FMR1,NALF2,HTR2C,CACNA1F	COAD
BP	cellular response to muramyl dipeptide	9	1	0.0483177	LDOC1	COAD
BP	diphosphoinositol polyphosphate metabolic process	5	1	0.0211683	NUDT10	COAD
BP	determination of digestive tract left/right asymmetry	7	1	0.0385227	ZIC3	COAD
BP	determination of liver left/right asymmetry	6	1	0.0358507	ZIC3	COAD
BP	protein localization to membrane	567	8	0.0214051	ZDHHC15,TIMM8A,DLG3,FGF13,FLNA,AR,WNK3,CHRDL1	COAD
BP	protein localization to microtubule cytoskeleton	54	2	0.0432865	MID2,MID1	COAD
BP	cardiac muscle cell action potential	78	3	0.00944991	FGF13,FLNA,KCNE5	COAD
BP	cardiac muscle cell action potential involved in contraction	53	2	0.0345623	FLNA,KCNE5	COAD
BP	cardiac muscle cell contraction	75	3	0.00780394	FGF13,FLNA,KCNE5	COAD
BP	membrane repolarization	51	2	0.0341613	FLNA,KCNE5	COAD
BP	membrane repolarization during action potential	30	2	0.0120937	FLNA,KCNE5	COAD
BP	membrane repolarization during cardiac muscle cell action potential	25	2	0.00825703	FLNA,KCNE5	COAD
BP	atrial cardiac muscle cell action potential	19	2	0.00505367	FLNA,KCNE5	COAD
BP	cell-cell signaling involved in cardiac conduction	37	2	0.0173024	FLNA,KCNE5	COAD
BP	atrial cardiac muscle cell to AV node cell signaling	19	2	0.00505367	FLNA,KCNE5	COAD
BP	cell communication involved in cardiac conduction	61	2	0.0465082	FLNA,KCNE5	COAD
BP	atrial cardiac muscle cell to AV node cell communication	19	2	0.00505367	FLNA,KCNE5	COAD
BP	male anatomical structure morphogenesis	4	1	0.0214421	AR	COAD
BP	dendritic spine organization	79	3	0.0102832	ZDHHC15,PAK3,GPRASP3	COAD
BP	postsynaptic membrane assembly	9	1	0.0497892	NLGN3	COAD
BP	presynaptic membrane assembly	8	1	0.0464054	NLGN3	COAD
BP	calcium ion transmembrane import into cytosol	181	5	0.00353049	CLIC2,FLNA,NALF2,HTR2C,CACNA1F	COAD
BP	inorganic cation import across plasma membrane	125	3	0.0326921	NALF2,WNK3,CACNA1F	COAD
BP	regulation of synaptic vesicle cycle	8	1	0.0429879	SYN1	COAD
BP	calcium ion import across plasma membrane	41	2	0.0192953	NALF2,CACNA1F	COAD
BP	regulation of action potential	61	2	0.0459136	FGF13,FLNA,FMR1	COAD
BP	regulation of membrane repolarization during action potential	10	1	0.0474472	FLNA	COAD
BP	regulation of cardiac muscle cell action potential involved in regulation of contraction	8	1	0.0431712	FGF13	COAD
BP	membrane repolarization during atrial cardiac muscle cell action potential	7	1	0.0366354	FLNA	COAD
BP	presynapse assembly	48	4	0.000162507	SLITRK4,IL1RAPL2,NLGN3,SLITRK2	COAD
BP	postsynapse assembly	28	2	0.0110145	ARHGEF9,NLGN3	COAD
BP	presynapse organization	51	4	0.000209374	SLITRK4,IL1RAPL2,NLGN3,SLITRK2	COAD
BP	postsynapse organization	161	7	4.14e-05	ZDHHC15,CNKSR2,ARHGEF9,PAK3,NLGN3,GPRASP3,CHRDL1	COAD
BP	regulation of presynapse organization	34	3	0.000957054	SLITRK4,IL1RAPL2,SLITRK2	COAD
BP	regulation of postsynapse organization	85	3	0.0127429	ZDHHC15,PAK3,GPRASP3	COAD
BP	inorganic ion import across plasma membrane	125	3	0.0326921	NALF2,WNK3,CACNA1F	COAD
BP	cardiac muscle cell membrane repolarization	39	2	0.0206293	FLNA,KCNE5	COAD
BP	regulation of cardiac muscle cell membrane repolarization	28	2	0.0105911	FLNA,KCNE5	COAD
BP	atrial cardiac muscle cell membrane repolarization	11	2	0.00164527	FLNA,KCNE5	COAD
BP	neuron projection organization	89	3	0.0147778	ZDHHC15,PAK3,GPRASP3	COAD
BP	plasma membrane bounded cell projection morphogenesis	635	11	0.00105557	SLITRK4,ZDHHC15,EFNB1,NRK,FGF13,L1CAM,MCF2,PAK3,NLGN3,GPRASP3,SLITRK2	COAD
BP	protein targeting to Golgi apparatus	1	1	0.0069825	ZDHHC15	COAD
BP	negative regulation of trophoblast cell migration	7	1	0.0387427	TIMP1	COAD
BP	regulation of potassium ion transmembrane transport	97	3	0.0169499	FLNA,KCNE5,WNK3	COAD
BP	positive regulation of potassium ion transmembrane transport	44	3	0.00210179	FLNA,KCNE5,WNK3	COAD
BP	regulation of cell junction assembly	203	6	0.0010356	SLITRK4,IL1RAPL2,ARHGAP6,NLGN3,GPRASP3,SLITRK2	COAD
BP	positive regulation of cell junction assembly	105	4	0.00276112	SLITRK4,NLGN3,GPRASP3,SLITRK2	COAD
BP	diadenosine pentaphosphate metabolic process	5	1	0.0211683	NUDT10	COAD
BP	diadenosine pentaphosphate catabolic process	5	1	0.0211683	NUDT10	COAD
BP	diadenosine hexaphosphate metabolic process	5	1	0.0211683	NUDT10	COAD
BP	diadenosine hexaphosphate catabolic process	5	1	0.0211683	NUDT10	COAD
BP	adenosine 5'-(hexahydrogen pentaphosphate) metabolic process	5	1	0.0211683	NUDT10	COAD
BP	adenosine 5'-(hexahydrogen pentaphosphate) catabolic process	5	1	0.0211683	NUDT10	COAD
BP	positive regulation of potassium ion import across plasma membrane	7	1	0.0422085	WNK3	COAD
BP	regulation of growth hormone activity	2	1	0.011574	LDOC1	COAD
BP	regulation of potassium ion export across plasma membrane	8	1	0.0439907	KCNE5	COAD
BP	negative regulation of potassium ion export across plasma membrane	3	1	0.0178515	KCNE5	COAD
BP	regulation of cation transmembrane transport	387	6	0.0250922	CLIC2,FGF13,FLNA,FMR1,KCNE5,NLGN3,WNK3	COAD
BP	positive regulation of cation transmembrane transport	169	4	0.0178159	FLNA,KCNE5,NLGN3,WNK3	COAD
BP	negative regulation of type B pancreatic cell proliferation	3	1	0.0189374	WDR13	COAD
BP	regulation of membrane repolarization during atrial cardiac muscle cell action potential	2	1	0.00841164	FLNA	COAD
BP	regulation of membrane repolarization during cardiac muscle cell action potential	7	1	0.0316052	FLNA	COAD
BP	regulation of voltage-gated sodium channel activity	10	1	0.0492674	FGF13	COAD
BP	positive regulation of morphogenesis of an epithelium	36	2	0.0183278	AR,MAGED1	COAD
BP	regulation of presynapse assembly	34	3	0.000957054	SLITRK4,IL1RAPL2,SLITRK2	COAD
BP	G protein-coupled receptor catabolic process	1	1	0.00663523	GPRASP1	COAD
BP	response to water-immersion restraint stress	2	1	0.0114447	FOXO4	COAD
BP	regulation of sodium ion transmembrane transporter activity	59	2	0.0466626	FGF13,WNK3	COAD
BP	regulation of integrin-mediated signaling pathway	22	2	0.00703876	FLNA,TIMP1	COAD
BP	regulation of cation channel activity	194	4	0.0250616	CLIC2,FGF13,FMR1,KCNE5,NLGN3	COAD
BP	negative regulation of cation channel activity	62	2	0.0434789	CLIC2,FMR1,KCNE5	COAD
BP	negative regulation of transcription by RNA polymerase II	926	25	0.0140289	ZBTB33,HDAC6,CDX4,MAGED2,ARX,HCFC1,AR,MAGEB2,MECP2,ATRX,BCOR,MOSPD1,RBBP7,RPL10,BCORL1,ZNF674,SUV39H1,TBL1X,NKAP,USP9X,RBM10,UXT,PHF6,OGT,MAGED1	KIRC
BP	rDNA heterochromatin formation	9	2	0.0120035	PHF8,SUV39H1	KIRC
BP	RNA splicing, via transesterification reactions	297	10	0.0489079	PQBP1,FMR1,SRPK3,HTATSF1,RBMX2,RBM41,MBNL3,RBM3,RNF113A,RBM10	KIRC
BP	RNA splicing, via transesterification reactions with bulged adenosine as nucleophile	293	10	0.0449607	PQBP1,FMR1,SRPK3,HTATSF1,RBMX2,RBM41,MBNL3,RBM3,RNF113A,RBM10	KIRC
BP	alternative mRNA splicing, via spliceosome	78	4	0.0491184	PQBP1,FMR1,MBNL3,RBM10	KIRC
BP	mRNA splicing, via spliceosome	293	10	0.0449607	PQBP1,FMR1,SRPK3,HTATSF1,RBMX2,RBM41,MBNL3,RBM3,RNF113A,RBM10	KIRC
BP	negative regulation of histone H3-K36 methylation	1	1	0.0110737	BCOR	KIRC
BP	autophagy of mitochondrion	92	7	0.00114932	HDAC6,HUWE1,WDR45,SLC25A5,FUNDC2,TAFAZZIN,OGT	KIRC
BP	mitophagy	35	5	0.00038291	HDAC6,HUWE1,SLC25A5,TAFAZZIN,OGT	KIRC
BP	box H/ACA RNA 3'-end processing	2	1	0.0313294	DKC1	KIRC
BP	cell morphogenesis involved in differentiation	717	18	0.0373769	HDAC6,PQBP1,SLITRK4,ZDHHC15,ARX,EFNB1,FGF13,FLNA,GDI1,VSIG1,AR,L1CAM,MCF2,OPHN1,PAK3,NLGN3,CDKL5,USP9X	KIRC
BP	morphogenesis of a polarized epithelium	96	5	0.0198657	DLG3,GPC4,GPC3,MSN,OPHN1	KIRC
BP	negative regulation of cell-matrix adhesion	40	3	0.0209291	NEXMIF,ARHGAP6,CASK	KIRC
BP	desensitization of G protein-coupled receptor signaling pathway	19	2	0.0417684	UBQLN2,APLN	KIRC
BP	G protein-coupled receptor internalization	13	2	0.0205206	UBQLN2,APLN	KIRC
BP	regulation of respiratory gaseous exchange by nervous system process	12	2	0.019688	MECP2,NLGN3	KIRC
BP	regulation of receptor internalization	58	4	0.0160423	FMR1,UBQLN2,OPHN1,APLN	KIRC
BP	tRNA nucleoside ribose methylation	1	1	0.0190771	FTSJ1	KIRC
BP	renal water retention	1	1	0.022286	AVPR2	KIRC
BP	establishment of cell polarity involved in ameboidal cell migration	3	1	0.0446117	AMOT	KIRC
BP	generation of precursor metabolites and energy	481	16	0.0135235	ABCD1,G6PD,IDH3G,MAOB,NDUFA1,PGK1,PHKA1,PHKA2,ATP7A,NDUFB11,PRPS2,TAFAZZIN,UQCRH,OGT,PPP1R3F,SLC25A14	KIRC
BP	pentose-phosphate shunt	18	2	0.0404354	G6PD,PRPS2	KIRC
BP	oxidative phosphorylation	130	6	0.0360876	ABCD1,NDUFA1,ATP7A,NDUFB11,TAFAZZIN,UQCRH	KIRC
BP	nucleobase-containing compound metabolic process	5713	112	0.0389789	ZBTB33,HDAC6,HUWE1,PQBP1,CDX4,CETN2,ZNF275,MAGED2,MSL3,PIM2,MID2,RNASE11,HDX,FOXR2,SPIN4,ZXDB,USP51,SPIN3,ARX,DKC1,DNASE1L1,TSC22D3,EDA,ELF4,ELK1,ZNF449,ABCD1,ACSL4,FANCB,PHF8,FLNA,FMR1,AFF2,ACOT9,FTSJ1,G6PD,SRPK3,APEX2,HTATSF1,HCFC1,HMGB3,HNRNPH2,ZNF81,IGSF1,AR,MIR98,MAGEB2,MECP2,FOXO4,CITED1,NDUFA1,SPIN2B,NONO,PAK3,CDK16,MBTPS2,ARMCX3,RBMX2,PGK1,PIN4,TAF7L,SHLD2,NDUFB11,GNL3L,POU3F4,ATRX,BCOR,R…	KIRC
BP	DNA-templated transcription	3370	72	0.0257751	ZBTB33,HDAC6,PQBP1,CDX4,ZNF275,MAGED2,MSL3,PIM2,MID2,HDX,FOXR2,SPIN4,ZXDB,SPIN3,ARX,TSC22D3,EDA,ELF4,ELK1,ZNF449,PHF8,FLNA,HTATSF1,HCFC1,HMGB3,ZNF81,IGSF1,AR,MAGEB2,MECP2,FOXO4,CITED1,SPIN2B,NONO,CDK16,MBTPS2,ARMCX3,TAF7L,POU3F4,ATRX,BCOR,ZC4H2,MOSPD1,RBBP7,RPL10,RPS6KA3,BCORL1,ZNF674,SUV39H1,TBL1X,TFE3,TMSB4X,ZIC3,ZNF711,ZNF182,ZNF41,ZNF75D,HMGN5,NKAP,USP9X,RBM10,KDM5C,UXT,PHF6,OGT,IKBKG,PIR,CAS…	KIRC
BP	regulation of DNA-templated transcription	3260	70	0.023965	ZBTB33,HDAC6,PQBP1,CDX4,ZNF275,MAGED2,MSL3,PIM2,MID2,HDX,FOXR2,SPIN4,ZXDB,SPIN3,ARX,TSC22D3,EDA,ELF4,ELK1,ZNF449,PHF8,FLNA,HTATSF1,HCFC1,HMGB3,ZNF81,IGSF1,AR,MAGEB2,MECP2,FOXO4,CITED1,SPIN2B,NONO,CDK16,MBTPS2,ARMCX3,POU3F4,ATRX,BCOR,ZC4H2,MOSPD1,RBBP7,RPL10,RPS6KA3,BCORL1,ZNF674,SUV39H1,TBL1X,TFE3,TMSB4X,ZIC3,ZNF711,ZNF182,ZNF41,ZNF75D,HMGN5,NKAP,USP9X,RBM10,KDM5C,UXT,PHF6,OGT,IKBKG,CASK,APLN,CCN…	KIRC
BP	regulation of transcription by RNA polymerase II	2465	53	0.0473356	ZBTB33,HDAC6,CDX4,ZNF275,MAGED2,HDX,FOXR2,ZXDB,ARX,TSC22D3,ELF4,ELK1,ZNF449,PHF8,HTATSF1,HCFC1,HMGB3,ZNF81,AR,MAGEB2,MECP2,FOXO4,CITED1,MBTPS2,ARMCX3,POU3F4,ATRX,BCOR,MOSPD1,RBBP7,RPL10,RPS6KA3,BCORL1,ZNF674,SUV39H1,TBL1X,TFE3,ZIC3,ZNF711,ZNF182,ZNF41,ZNF75D,NKAP,USP9X,RBM10,UXT,PHF6,OGT,IKBKG,CASK,CCNQ,MAGED1,JADE3	KIRC
BP	transcription by RNA polymerase II	2548	55	0.0429839	ZBTB33,HDAC6,CDX4,ZNF275,MAGED2,HDX,FOXR2,ZXDB,ARX,TSC22D3,ELF4,ELK1,ZNF449,PHF8,HTATSF1,HCFC1,HMGB3,ZNF81,AR,MAGEB2,MECP2,FOXO4,CITED1,MBTPS2,ARMCX3,TAF7L,POU3F4,ATRX,BCOR,MOSPD1,RBBP7,RPL10,RPS6KA3,BCORL1,ZNF674,SUV39H1,TBL1X,TFE3,ZIC3,ZNF711,ZNF182,ZNF41,ZNF75D,NKAP,USP9X,RBM10,UXT,PHF6,OGT,IKBKG,PIR,CASK,CCNQ,MAGED1,JADE3	KIRC
BP	protein deacetylation	121	6	0.0189817	HDAC6,MSL3,FLNA,RBBP7,SUV39H1,TBL1X	KIRC
BP	protein monoubiquitination	84	5	0.0154284	HUWE1,FANCB,BCOR,ZC4H2,CUL4B	KIRC
BP	cellular biogenic amine metabolic process	94	6	0.00558505	MAOA,MAOB,MECP2,ATP7A,SAT1,SMS	KIRC
BP	polyamine metabolic process	18	2	0.0457773	SAT1,SMS	KIRC
BP	polyamine biosynthetic process	14	2	0.0282423	SAT1,SMS	KIRC
BP	spermine biosynthetic process	2	1	0.0378682	SMS	KIRC
BP	cellular aromatic compound metabolic process	5933	118	0.0222381	ZBTB33,HDAC6,HUWE1,PQBP1,CDX4,CETN2,ZNF275,PGRMC1,MAGED2,MSL3,PIM2,MID2,RNASE11,HDX,FOXR2,SPIN4,ZXDB,USP51,SPIN3,ARX,DKC1,DNASE1L1,TSC22D3,EDA,ELF4,ELK1,ZNF449,ABCD1,ACSL4,FANCB,ABCB7,PHF8,FLNA,FMR1,AFF2,ACOT9,FTSJ1,G6PD,SRPK3,APEX2,HTATSF1,HCFC1,HMGB3,HNRNPH2,ZNF81,IGSF1,AR,MIR98,MAGEB2,MAOA,MAOB,MECP2,FOXO4,CITED1,NDUFA1,SPIN2B,NONO,PAK3,CDK16,MBTPS2,ARMCX3,RBMX2,PGK1,PIN4,ATP7A,TAF7L,SHLD2,NDU…	KIRC
BP	ion transport	1545	37	0.0182753	ATP6AP2,MAGED2,PRAF2,CLCN4,CLCN5,DMD,ABCB7,FGF13,FHL1,FLNA,FMR1,G6PD,GABRA3,GABRE,GABRG3,GPM6B,GRIA3,SLC25A5,SHROOM2,MAOB,PLP2,ATP6AP1,ATP7A,NLGN3,CLTRN,SLC16A2,TMSB4X,SLC35A2,UQCRH,CACNA1F,SLC10A3,MAGT1,SLC7A3,CASK,SLC25A14,RGN,HEPH	KIRC
BP	chloride transport	118	5	0.043552	CLCN4,CLCN5,GABRA3,GABRE,GABRG3	KIRC
BP	copper ion transport	16	2	0.0336727	ATP7A,HEPH	KIRC
BP	serotonin transport	19	2	0.0458773	GPM6B,MAOB	KIRC
BP	nucleotide transport	37	4	0.00486878	ABCD1,GJB1,SLC25A5,SLC25A53	KIRC
BP	autophagy	545	17	0.0164606	HDAC6,HUWE1,RRAGB,PIM2,MID2,WDR45,TAB3,SLC25A5,UBQLN2,MTM1,TBC1D25,CDK16,MTMR8,FUNDC2,TAFAZZIN,OGT,IKBKG	KIRC
BP	organelle organization	3451	74	0.0365923	HDAC6,HUWE1,BCAP31,ATP6AP2,TIMM17B,CETN2,STAG2,TMSB15A,WDR45,CLCN4,AMOT,ZDHHC15,TIMM8A,DIAPH2,DKC1,DMD,DUSP1,EMD,ABCD1,FGF13,IQSEC2,PHF8,SEPTIN6,FLNA,AFF2,GPM6B,MCTS1,SLC25A5,UBQLN2,SH3KBP1,EHD2,HMGB3,SHROOM2,DNAJB13,ARHGAP6,MECP2,MID1,MSN,MTM1,NDUFA1,TBC1D25,OCRL,OPHN1,PAK3,ARMCX3,ATP6AP1,ATP7A,SHLD2,NDUFB11,GNL3L,ATRX,ERCC6L,GDPD2,CLTRN,SHROOM4,MID1IP1,RP2,RPL10,STEEP1,TRAPPC2,FUNDC2,CDKL5,SUV3…	KIRC
BP	nucleolus organization	17	2	0.0350924	PHF8,SUV39H1	KIRC
BP	mitochondrion organization	525	16	0.0302579	HDAC6,HUWE1,BCAP31,TIMM17B,WDR45,TIMM8A,SLC25A5,MTM1,NDUFA1,ARMCX3,ATP7A,NDUFB11,FUNDC2,TAFAZZIN,APOO,OGT	KIRC
BP	inner mitochondrial membrane organization	39	3	0.0340829	TIMM8A,TAFAZZIN,APOO	KIRC
BP	microtubule depolymerization	45	4	0.0068456	HDAC6,FGF13,MID1,MID1IP1	KIRC
BP	negative regulation of microtubule depolymerization	27	4	0.000887598	HDAC6,FGF13,MID1,MID1IP1	KIRC
BP	gamma-aminobutyric acid signaling pathway	27	3	0.0104572	GABRA3,GABRE,GABRG3	KIRC
BP	cell-cell signaling	1637	36	0.039474	ZBTB33,ATP6AP2,AMER1,PTCHD1,EDA,EFNB1,EMD,ACSL4,GPC4,FGF13,IQSEC2,FLNA,FMR1,GABRA3,GABRE,GABRG3,GJB1,GPC3,GLUD1,SH3KBP1,XIAP,AR,MIR98,MAOB,MECP2,CITED1,OPHN1,CDK16,NLGN3,OTUD5,CLTRN,RPS6KA3,SLC16A2,SYN1,SYP,TBL1X,CASK,CHRDL1	KIRC
BP	nervous system development	2452	51	0.0427568	HDAC6,PQBP1,ATP6AP2,SLITRK4,PTCHD1,ZDHHC15,TIMM8A,ARX,DMD,EFNB1,ABCD1,ACSL4,GPC4,FGF13,PHF8,FLNA,FMR1,AFF2,G6PD,IL1RAPL2,GDI1,GJB1,SRPX2,GLUD1,GPM6B,NEXMIF,SHROOM2,L1CAM,MAOB,MCF2,MECP2,CITED1,OPHN1,PAK3,CDK16,ATP7A,NLGN3,POU3F4,ATRX,AVPR2,ZC4H2,SHROOM4,PCDH19,RBBP7,RPS6KA3,CDKL5,SYN1,ZIC3,USP9X,CUL4B,FRMD7,CHRDL1	KIRC
BP	axonogenesis	436	13	0.0198845	HDAC6,SLITRK4,ARX,EFNB1,FGF13,GDI1,L1CAM,MCF2,OPHN1,PAK3,NLGN3,CDKL5,USP9X	KIRC
BP	synapse assembly	181	7	0.0240257	SLITRK4,GPC4,FGF13,IL1RAPL2,SRPX2,MECP2,NLGN3	KIRC
BP	brain development	747	19	0.0365707	PTCHD1,ARX,FGF13,PHF8,AFF2,G6PD,GLUD1,SHROOM2,MAOB,MECP2,CITED1,OPHN1,ATP7A,POU3F4,ATRX,AVPR2,SHROOM4,PCDH19,RBBP7,ZIC3	KIRC
BP	eye pigment granule organization	1	1	0.0126702	SHROOM2	KIRC
BP	protein localization	2408	54	0.0319222	HDAC6,HUWE1,BCAP31,TIMM17B,RRAGB,CETN2,TMSB15A,MID2,WDR45,PRAF2,AMOT,ZDHHC15,TIMM8A,DKC1,DLG3,DMD,EMD,ACSL4,GPC4,FGF13,IQSEC2,SEPTIN6,FLNA,GDI1,GPC3,GLUD1,GPM6B,SNX12,EHD2,RAB41,SHROOM2,AR,MIR98,MECP2,MID1,MSN,MTM1,ZDHHC9,CDK16,ARMCX3,ATP6AP1,GNL3L,ATRX,GRIPAP1,CLTRN,RP2,TMSB4X,RNF128,USP9X,UBL4A,CASK,AKAP4,CCDC120,CHRDL1,RAB9A,MAGED1	KIRC
BP	biosynthetic process	5679	114	0.0330842	ZBTB33,HDAC6,PQBP1,CDX4,ZNF275,PGRMC1,MAGED2,MSL3,PIM2,MID2,WDR45,HDX,FOXR2,SPIN4,ZXDB,ZDHHC15,SPIN3,ARX,DKC1,DMD,TSC22D3,EDA,EEF1D,ELF4,ELK1,ZNF449,ABCD1,ACSL4,ABCB7,PHF8,FLNA,FMR1,FTSJ1,G6PD,GK,GLA,HTATSF1,GLUD1,MCTS1,HCFC1,HMGB3,ZNF81,IGSF1,AR,ZCCHC13,MIR98,MAGEB2,MAOB,MECP2,FOXO4,CITED1,MTM1,NDUFA1,SPIN2B,NONO,OCRL,PAK3,NSDHL,ZDHHC9,CDK16,MBTPS2,ARMCX3,PGK1,ATP7A,TAF7L,NDUFB11,GNL3L,POU3F4,AT…	KIRC
BP	aerobic respiration	177	8	0.0195258	ABCD1,IDH3G,NDUFA1,ATP7A,NDUFB11,TAFAZZIN,UQCRH,SLC25A14	KIRC
BP	amine metabolic process	114	6	0.0144278	MAOA,MAOB,MECP2,ATP7A,SAT1,SMS	KIRC
BP	amine catabolic process	18	3	0.00319529	MAOA,MAOB,SAT1	KIRC
BP	putrescine catabolic process	2	1	0.0335638	SAT1	KIRC
BP	axis specification	95	5	0.0195518	CDX4,GPC3,BCOR,ZIC3,CHRDL1	KIRC
BP	regulation of biosynthetic process	4027	85	0.0179367	ZBTB33,HDAC6,PQBP1,CDX4,ZNF275,MAGED2,MSL3,PIM2,MID2,HDX,FOXR2,SPIN4,ZXDB,SPIN3,ARX,DKC1,TSC22D3,EDA,ELF4,ELK1,ZNF449,ABCD1,ABCB7,PHF8,FLNA,FMR1,GLA,HTATSF1,HCFC1,HMGB3,ZNF81,IGSF1,AR,ZCCHC13,MIR98,MAGEB2,MECP2,FOXO4,CITED1,SPIN2B,NONO,PAK3,CDK16,MBTPS2,ARMCX3,ATP7A,GNL3L,POU3F4,ATRX,BCOR,ZC4H2,MOSPD1,MID1IP1,RBBP7,RBM3,RPL10,RPS6KA3,BCORL1,ZNF674,SH3BGRL,UPF3B,SUV39H1,TAFAZZIN,TBL1X,TFE3,TMSB4X,…	KIRC
BP	regulation of catabolic process	981	30	0.00189044	HDAC6,BCAP31,RRAGB,PIM2,MID2,WDR45,AMER1,ASB9,DKC1,ABCD1,FLNA,FMR1,TAB3,GPC3,SLC25A5,SNX12,UBQLN2,MIR98,MSN,MTM1,TBC1D25,OPHN1,CDK16,MTMR8,RNF128,USP9X,RBM10,CUL4B,OGT,IKBKG,RGN	KIRC
BP	negative regulation of catabolic process	319	12	0.00938955	DKC1,FLNA,FMR1,TAB3,SNX12,MTM1,OPHN1,MTMR8,USP9X,RBM10,OGT,RGN	KIRC
BP	positive regulation of catabolic process	525	16	0.0199427	BCAP31,PIM2,MID2,WDR45,AMER1,ASB9,ABCD1,FMR1,GPC3,SLC25A5,UBQLN2,MIR98,MSN,CDK16,RNF128,CUL4B,IKBKG	KIRC
BP	response to iron(III) ion	4	2	0.00218477	G6PD,ATP7A	KIRC
BP	regulation of autophagy	339	13	0.00625888	HDAC6,RRAGB,PIM2,MID2,WDR45,TAB3,SLC25A5,UBQLN2,MTM1,TBC1D25,CDK16,MTMR8,IKBKG	KIRC
BP	positive regulation of autophagy	142	6	0.038899	PIM2,MID2,WDR45,SLC25A5,CDK16,IKBKG	KIRC
BP	regulation of macromolecule biosynthetic process	3798	79	0.0322526	ZBTB33,HDAC6,PQBP1,CDX4,ZNF275,MAGED2,MSL3,PIM2,MID2,HDX,FOXR2,SPIN4,ZXDB,SPIN3,ARX,DKC1,TSC22D3,EDA,ELF4,ELK1,ZNF449,PHF8,FLNA,FMR1,HTATSF1,HCFC1,HMGB3,ZNF81,IGSF1,AR,ZCCHC13,MIR98,MAGEB2,MECP2,FOXO4,CITED1,SPIN2B,NONO,PAK3,CDK16,MBTPS2,ARMCX3,GNL3L,POU3F4,ATRX,BCOR,ZC4H2,MOSPD1,RBBP7,RBM3,RPL10,RPS6KA3,BCORL1,ZNF674,SH3BGRL,UPF3B,SUV39H1,TBL1X,TFE3,TMSB4X,ZIC3,ZNF711,ZNF182,ZNF41,ZNF75D,HMGN5,N…	KIRC
BP	negative regulation of organelle organization	352	14	0.00307962	HDAC6,HUWE1,TMSB15A,DUSP1,FGF13,SLC25A5,ARHGAP6,MID1,MTM1,GNL3L,ATRX,MID1IP1,TMSB4X,FRMD7	KIRC
BP	protein glutathionylation	2	1	0.0393498	G6PD	KIRC
BP	regulation of protein glutathionylation	2	1	0.0393498	G6PD	KIRC
BP	negative regulation of protein glutathionylation	2	1	0.0393498	G6PD	KIRC
BP	purine nucleotide transport	28	3	0.0143978	ABCD1,GJB1,SLC25A5	KIRC
BP	purine ribonucleotide transport	27	3	0.0127686	ABCD1,GJB1,SLC25A5	KIRC
BP	fatty-acyl-CoA transport	2	1	0.0367204	ABCD1	KIRC
BP	nucleobase-containing compound transport	214	9	0.0154074	CETN2,ABCD1,FMR1,GJB1,SLC25A5,SLC25A53,LUZP4,UPF3B,SLC35A2	KIRC
BP	energy derivation by oxidation of organic compounds	314	11	0.0292064	ABCD1,IDH3G,NDUFA1,PHKA1,PHKA2,ATP7A,NDUFB11,TAFAZZIN,UQCRH,PPP1R3F,SLC25A14	KIRC
BP	cellular component organization	6086	124	0.0141044	HDAC6,HUWE1,PQBP1,BCAP31,ATP6AP2,TIMM17B,CETN2,STAG2,MSL3,TMSB15A,WDR45,CLCN4,SLITRK4,DOCK11,AMOT,ZDHHC15,H2BW1,TIMM8A,ARX,DIAPH2,DKC1,DMD,DUSP1,EFNB1,EMD,VMA21,ABCD1,ABCB7,GPC4,FGF13,FHL1,CNKSR2,IQSEC2,PHF8,SEPTIN6,FLNA,FMR1,AFF2,G6PD,EGFL6,IL1RAPL2,SRPK3,GDI1,GJB1,GPC3,SRPX2,HTATSF1,GPM6B,MCTS1,SLC25A5,SNX12,UBQLN2,SH3KBP1,HCFC1,EHD2,HMGB3,SHROOM2,AR,DNAJB13,L1CAM,ARHGAP6,PRICKLE3,MIR98,MCF2,ME…	KIRC
BP	sno(s)RNA metabolic process	17	2	0.0363091	DKC1,RNF113A	KIRC
BP	synaptic vesicle maturation	12	2	0.0195267	ZDHHC15,SYP	KIRC
BP	macroautophagy	313	11	0.0274109	HDAC6,HUWE1,WDR45,SLC25A5,UBQLN2,MTM1,TBC1D25,MTMR8,TAFAZZIN,OGT,IKBKG	KIRC
BP	regulation of macroautophagy	159	8	0.00775635	HDAC6,WDR45,SLC25A5,UBQLN2,MTM1,TBC1D25,MTMR8,IKBKG	KIRC
BP	dendrite development	233	8	0.0354806	HDAC6,PQBP1,ZDHHC15,FMR1,MCF2,MECP2,PAK3,CDKL5	KIRC
BP	histone modification	466	16	0.00809971	HDAC6,HUWE1,MSL3,USP51,PHF8,HCFC1,MECP2,ATRX,BCOR,RBBP7,SUV39H1,TBL1X,KDM5C,CUL4B,OGT,JADE3	KIRC
BP	histone deacetylation	101	5	0.031507	HDAC6,MSL3,RBBP7,SUV39H1,TBL1X	KIRC
BP	peptidyl-lysine methylation	142	6	0.038912	HCFC1,MECP2,ATRX,BCOR,SUV39H1,OGT	KIRC
BP	peptidyl-lysine trimethylation	56	4	0.016898	MECP2,ATRX,SUV39H1,OGT	KIRC
BP	heterocycle biosynthetic process	3875	84	0.0132485	ZBTB33,HDAC6,PQBP1,CDX4,ZNF275,PGRMC1,MAGED2,MSL3,PIM2,MID2,HDX,FOXR2,SPIN4,ZXDB,SPIN3,ARX,DKC1,TSC22D3,EDA,ELF4,ELK1,ZNF449,ACSL4,ABCB7,PHF8,FLNA,HTATSF1,HCFC1,HMGB3,ZNF81,IGSF1,AR,MAGEB2,MECP2,FOXO4,CITED1,NDUFA1,SPIN2B,NONO,PAK3,CDK16,MBTPS2,ARMCX3,TAF7L,NDUFB11,GNL3L,POU3F4,ATRX,BCOR,ZC4H2,MOSPD1,PRPS2,CTPS2,RBBP7,RPL10,RPS6KA3,BCORL1,ZNF674,SUV39H1,TAFAZZIN,TBL1X,TFE3,TMSB4X,ZIC3,ZNF711,ZNF1…	KIRC
BP	isopeptide cross-linking	2	1	0.0339422	RNF113A	KIRC
BP	isopeptide cross-linking via N6-glycyl-L-lysine	1	1	0.0174604	RNF113A	KIRC
BP	phenol-containing compound metabolic process	109	5	0.0336042	MAOA,MAOB,CITED1,ATP7A,SLC16A2	KIRC
BP	somatic sex determination	2	1	0.0337753	AR	KIRC
BP	viral latency	3	1	0.0443408	HCFC1	KIRC
BP	latent virus replication	1	1	0.0118396	HCFC1	KIRC
BP	release from viral latency	1	1	0.0118396	HCFC1	KIRC
BP	male somatic sex determination	1	1	0.0116188	AR	KIRC
BP	regulation of nucleobase-containing compound metabolic process	3873	86	0.00586681	ZBTB33,HDAC6,PQBP1,CDX4,ZNF275,MAGED2,MSL3,PIM2,MID2,HDX,FOXR2,SPIN4,ZXDB,USP51,SPIN3,ARX,DKC1,TSC22D3,EDA,ELF4,ELK1,ZNF449,FANCB,PHF8,FLNA,FMR1,AFF2,SRPK3,HTATSF1,HCFC1,HMGB3,HNRNPH2,ZNF81,IGSF1,AR,MIR98,MAGEB2,MECP2,FOXO4,CITED1,SPIN2B,NONO,PAK3,CDK16,MBTPS2,ARMCX3,SHLD2,GNL3L,POU3F4,ATRX,BCOR,RADX,MBNL3,ZC4H2,MOSPD1,RBBP7,RBM3,RPL10,RPS6KA3,BCORL1,TSPYL2,ZNF674,SUV39H1,TAFAZZIN,TBL1X,TFE3,TMSB…	KIRC
BP	regulation of metabolic process	6841	130	0.0433055	ZBTB33,HDAC6,FTX,HUWE1,PQBP1,BCAP31,ATP6AP2,RRAGB,CDX4,ZNF275,MAGED2,MSL3,PIM2,MID2,WDR45,AMER1,HDX,FOXR2,SPIN4,ASB9,ZXDB,USP51,SPIN3,ARX,DKC1,DLG3,DMD,TSC22D3,DUSP1,EDA,ELF4,ELK1,ZNF449,ABCD1,FANCB,ABCB7,FGF13,PHF8,FLNA,FMR1,AFF2,G6PD,TAB3,SRPK3,GLA,GPC3,SRPX2,HTATSF1,PCSK1N,SLC25A5,SNX12,UBQLN2,HCFC1,HMGB3,HNRNPH2,XIAP,ZNF81,IGSF1,AR,ZCCHC13,MIRLET7F2,MIR98,MAGEB2,MAOB,MECP2,FOXO4,CITED1,MSN,MT…	KIRC
BP	pentose biosynthetic process	2	1	0.0393531	G6PD	KIRC
BP	phenol-containing compound catabolic process	10	2	0.0136421	MAOA,MAOB	KIRC
BP	aromatic compound biosynthetic process	3889	85	0.010184	ZBTB33,HDAC6,PQBP1,CDX4,ZNF275,PGRMC1,MAGED2,MSL3,PIM2,MID2,HDX,FOXR2,SPIN4,ZXDB,SPIN3,ARX,DKC1,TSC22D3,EDA,ELF4,ELK1,ZNF449,ACSL4,ABCB7,PHF8,FLNA,HTATSF1,HCFC1,HMGB3,ZNF81,IGSF1,AR,MAGEB2,MECP2,FOXO4,CITED1,NDUFA1,SPIN2B,NONO,PAK3,CDK16,MBTPS2,ARMCX3,ATP7A,TAF7L,NDUFB11,GNL3L,POU3F4,ATRX,BCOR,ZC4H2,MOSPD1,PRPS2,CTPS2,RBBP7,RPL10,RPS6KA3,BCORL1,ZNF674,SUV39H1,TAFAZZIN,TBL1X,TFE3,TMSB4X,ZIC3,ZNF71…	KIRC
BP	catechol-containing compound catabolic process	7	2	0.00633695	MAOA,MAOB	KIRC
BP	L-ascorbic acid biosynthetic process	2	1	0.0392719	RGN	KIRC
BP	axonal transport of mitochondrion	18	2	0.0398735	HDAC6,ARMCX3	KIRC
BP	cell differentiation in hindbrain	22	2	0.0460466	OPHN1,ATP7A	KIRC
BP	embryonic olfactory bulb interneuron precursor migration	1	1	0.0116313	ARX	KIRC
BP	negative adaptation of signaling pathway	19	2	0.0417684	UBQLN2,APLN	KIRC
BP	regulation of transmembrane transporter activity	284	9	0.0443854	DMD,FGF13,FHL1,FMR1,ATP7A,NLGN3,CLTRN,TMSB4X,RGN	KIRC
BP	actin cytoskeleton organization	715	18	0.0446191	TMSB15A,AMOT,DIAPH2,DMD,IQSEC2,FLNA,GPM6B,SH3KBP1,EHD2,SHROOM2,ARHGAP6,OPHN1,PAK3,GDPD2,SHROOM4,TMSB4X,FRMD7,STARD8	KIRC
BP	positive regulation of Wnt signaling pathway	143	6	0.0285974	ATP6AP2,AMER1,EDA,GPC3,XIAP,TBL1X	KIRC
BP	regulation of histone methylation	81	6	0.00254708	HCFC1,MECP2,ATRX,BCOR,SUV39H1,OGT	KIRC
BP	positive regulation of histone methylation	51	4	0.011311	HCFC1,MECP2,SUV39H1,OGT	KIRC
BP	microtubule polymerization or depolymerization	122	6	0.01778	HDAC6,FGF13,MECP2,MID1,MID1IP1,MAP7D3	KIRC
BP	regulation of microtubule polymerization or depolymerization	85	5	0.0148996	HDAC6,FGF13,MECP2,MID1,MID1IP1	KIRC
BP	negative regulation of microtubule polymerization or depolymerization	39	4	0.00374632	HDAC6,FGF13,MID1,MID1IP1	KIRC
BP	regulation of microtubule depolymerization	31	4	0.00159528	HDAC6,FGF13,MID1,MID1IP1	KIRC
BP	neuron projection development	953	23	0.036597	HDAC6,PQBP1,SLITRK4,ZDHHC15,ARX,EFNB1,FGF13,FLNA,FMR1,GDI1,GPM6B,L1CAM,MCF2,MECP2,OPHN1,PAK3,CDK16,ATP7A,NLGN3,CDKL5,USP9X,CUL4B,FRMD7	KIRC
BP	regulation of cellular metabolic process	5458	112	0.0146597	ZBTB33,HDAC6,PQBP1,BCAP31,RRAGB,CDX4,ZNF275,MAGED2,MSL3,PIM2,MID2,WDR45,HDX,FOXR2,SPIN4,ZXDB,USP51,SPIN3,ARX,DKC1,DLG3,DMD,TSC22D3,DUSP1,EDA,ELF4,ELK1,ZNF449,ABCD1,FANCB,ABCB7,FGF13,PHF8,FLNA,FMR1,AFF2,G6PD,TAB3,SRPK3,GLA,SRPX2,HTATSF1,SLC25A5,UBQLN2,HCFC1,HMGB3,HNRNPH2,ZNF81,IGSF1,AR,ZCCHC13,MIR98,MAGEB2,MAOB,MECP2,FOXO4,CITED1,MTM1,SPIN2B,NONO,TBC1D25,PAK3,CDK16,MBTPS2,ARMCX3,ATP7A,SHLD2,GNL3L,…	KIRC
BP	regulation of cellular biosynthetic process	3963	85	0.0120692	ZBTB33,HDAC6,PQBP1,CDX4,ZNF275,MAGED2,MSL3,PIM2,MID2,HDX,FOXR2,SPIN4,ZXDB,SPIN3,ARX,DKC1,TSC22D3,EDA,ELF4,ELK1,ZNF449,ABCD1,ABCB7,PHF8,FLNA,FMR1,GLA,HTATSF1,HCFC1,HMGB3,ZNF81,IGSF1,AR,ZCCHC13,MIR98,MAGEB2,MECP2,FOXO4,CITED1,SPIN2B,NONO,PAK3,CDK16,MBTPS2,ARMCX3,ATP7A,GNL3L,POU3F4,ATRX,BCOR,ZC4H2,MOSPD1,MID1IP1,RBBP7,RBM3,RPL10,RPS6KA3,BCORL1,ZNF674,SH3BGRL,UPF3B,SUV39H1,TAFAZZIN,TBL1X,TFE3,TMSB4X,…	KIRC
BP	regulation of cellular catabolic process	785	21	0.0315202	HDAC6,BCAP31,RRAGB,PIM2,MID2,WDR45,DKC1,ABCD1,FMR1,TAB3,SLC25A5,UBQLN2,MIR98,MTM1,TBC1D25,CDK16,MTMR8,USP9X,RBM10,OGT,IKBKG,RGN	KIRC
BP	negative regulation of cellular catabolic process	237	9	0.0221175	DKC1,FMR1,TAB3,MTM1,MTMR8,USP9X,RBM10,OGT,RGN	KIRC
BP	regulation of protein stability	318	12	0.0117558	HDAC6,PIM2,FLNA,HCFC1,USP27X,GNL3L,TBL1X,VBP1,RNF128,USP9X,UBL4A,UXT	KIRC
BP	positive regulation of TOR signaling	47	3	0.0455886	RRAGB,OTUD5,USP9X	KIRC
BP	cardiolipin metabolic process	17	2	0.0357776	MECP2,TAFAZZIN	KIRC
BP	negative regulation of proteasomal ubiquitin-dependent protein catabolic process	36	3	0.0271139	MTM1,USP9X,OGT	KIRC
BP	Rab protein signal transduction	20	3	0.00476789	GDI1,RAB33A,RAB9A	KIRC
BP	developmental process	6306	123	0.0185703	HDAC6,HUWE1,PQBP1,BCAP31,ATP6AP2,CDX4,CETN2,RAI2,PLAC1,SLITRK4,AMER1,PTCHD1,DOCK11,AMOT,ZDHHC15,TIMM8A,ARX,DIAPH2,DLG3,DMD,DUSP1,DUSP9,EDA,EFNB1,ELF4,ELK1,EMD,ZNF449,ABCD1,ACSL4,GPC4,FGF13,FHL1,PHF8,SEPTIN6,FLNA,FMR1,AFF2,LDOC1,G6PD,EGFL6,IL1RAPL2,SRPK3,GDI1,GJB1,GPC3,SRPX2,GLUD1,GPM6B,YIPF6,SLC25A5,SH3KBP1,EHD2,HMGB3,NHSL2,NEXMIF,VSIG1,SHROOM2,AR,L1CAM,MIR98,MAOB,MCF2,MECP2,MID1,FOXO4,CITED1,MSN…	KIRC
BP	regulation of tyrosinase activity	2	1	0.034049	ATP7A	KIRC
BP	positive regulation of tyrosinase activity	2	1	0.034049	ATP7A	KIRC
BP	RNA biosynthetic process	3389	73	0.0211757	ZBTB33,HDAC6,PQBP1,CDX4,ZNF275,MAGED2,MSL3,PIM2,MID2,HDX,FOXR2,SPIN4,ZXDB,SPIN3,ARX,TSC22D3,EDA,ELF4,ELK1,ZNF449,PHF8,FLNA,HTATSF1,HCFC1,HMGB3,ZNF81,IGSF1,AR,MAGEB2,MECP2,FOXO4,CITED1,SPIN2B,NONO,CDK16,MBTPS2,ARMCX3,TAF7L,POU3F4,ATRX,BCOR,ZC4H2,MOSPD1,RBBP7,RPL10,RPS6KA3,BCORL1,ZNF674,SUV39H1,TBL1X,TFE3,TMSB4X,ZIC3,ZNF711,ZNF182,ZNF41,ZNF75D,HMGN5,NKAP,USP9X,RBM10,KDM5C,UXT,PHF6,OGT,IKBKG,PIR,CAS…	KIRC
BP	polyamine acetylation	2	1	0.0360881	SAT1	KIRC
BP	spermidine acetylation	2	1	0.0360881	SAT1	KIRC
BP	cell part morphogenesis	659	17	0.0340768	HDAC6,PQBP1,SLITRK4,ZDHHC15,ARX,EFNB1,FGF13,GDI1,L1CAM,MCF2,MTM1,OPHN1,PAK3,ATP7A,NLGN3,CDKL5,USP9X	KIRC
BP	response to testosterone	42	3	0.0372375	ELK1,AR,MSN	KIRC
BP	ion transmembrane transport	1137	30	0.00901404	ATP6AP2,PRAF2,CLCN4,CLCN5,DMD,ABCB7,FGF13,FHL1,FLNA,FMR1,G6PD,GABRA3,GABRE,GABRG3,GRIA3,SLC25A5,SHROOM2,PLP2,ATP6AP1,ATP7A,NLGN3,CLTRN,TMSB4X,SLC35A2,UQCRH,CACNA1F,MAGT1,SLC7A3,SLC25A14,RGN	KIRC
BP	snoRNA splicing	2	1	0.029734	RNF113A	KIRC
BP	cell junction assembly	423	12	0.0382415	SLITRK4,GPC4,FGF13,IL1RAPL2,GJB1,SRPX2,GPM6B,ARHGAP6,MECP2,OPHN1,NLGN3,CLDN2	KIRC
BP	cell junction organization	694	23	0.0008702	HDAC6,SLITRK4,ZDHHC15,GPC4,FGF13,CNKSR2,FLNA,IL1RAPL2,GJB1,SRPX2,GPM6B,L1CAM,ARHGAP6,MECP2,OPHN1,PAK3,NLGN3,ZC4H2,GRIPAP1,CDKL5,SYN1,CLDN2,CHRDL1	KIRC
BP	cellular nitrogen compound metabolic process	6550	128	0.0309615	ZBTB33,HDAC6,HUWE1,PQBP1,ATP6AP2,CDX4,CETN2,ZNF275,PGRMC1,MAGED2,MSL3,PIM2,MID2,RNASE11,HDX,FOXR2,SPIN4,ZXDB,USP51,SPIN3,ARX,DKC1,DMD,DNASE1L1,TSC22D3,EDA,EEF1D,ELF4,ELK1,ZNF449,ABCD1,ACSL4,FANCB,ABCB7,PHF8,FLNA,FMR1,AFF2,ACOT9,FTSJ1,G6PD,SRPK3,GLA,APEX2,HTATSF1,PCSK1N,MCTS1,HCFC1,HMGB3,HNRNPH2,ZNF81,IGSF1,AR,ZCCHC13,MIR98,MAGEB2,MAOA,MAOB,MECP2,FOXO4,CITED1,NDUFA1,SPIN2B,NONO,PAK3,CDK16,MBTPS2,A…	KIRC
BP	establishment of mitochondrion localization, microtubule-mediated	26	3	0.0101411	HDAC6,ARMCX3,UXT	KIRC
BP	nucleobase-containing compound biosynthetic process	3805	82	0.0161879	ZBTB33,HDAC6,PQBP1,CDX4,ZNF275,MAGED2,MSL3,PIM2,MID2,HDX,FOXR2,SPIN4,ZXDB,SPIN3,ARX,DKC1,TSC22D3,EDA,ELF4,ELK1,ZNF449,ACSL4,PHF8,FLNA,HTATSF1,HCFC1,HMGB3,ZNF81,IGSF1,AR,MAGEB2,MECP2,FOXO4,CITED1,NDUFA1,SPIN2B,NONO,PAK3,CDK16,MBTPS2,ARMCX3,TAF7L,NDUFB11,GNL3L,POU3F4,ATRX,BCOR,ZC4H2,MOSPD1,PRPS2,CTPS2,RBBP7,RPL10,RPS6KA3,BCORL1,ZNF674,SUV39H1,TAFAZZIN,TBL1X,TFE3,TMSB4X,ZIC3,ZNF711,ZNF182,ZNF41,ZNF7…	KIRC
BP	positive regulation of transmembrane transport	233	8	0.0442184	DMD,FLNA,G6PD,GPC3,NLGN3,CLTRN,TMSB4X,RGN	KIRC
BP	positive regulation of ion transmembrane transport	184	7	0.0367737	DMD,FLNA,G6PD,NLGN3,CLTRN,TMSB4X,RGN	KIRC
BP	box H/ACA RNA processing	2	1	0.0313294	DKC1	KIRC
BP	histone lysine methylation	129	6	0.0262217	HCFC1,MECP2,ATRX,BCOR,SUV39H1,OGT	KIRC
BP	post-embryonic appendage morphogenesis	1	1	0.0219342	ATRX	KIRC
BP	post-embryonic limb morphogenesis	1	1	0.0219342	ATRX	KIRC
BP	post-embryonic forelimb morphogenesis	1	1	0.0219342	ATRX	KIRC
BP	social behavior	51	3	0.0489895	PTCHD1,MECP2,NLGN3	KIRC
BP	protein localization to microtubule	19	2	0.0440345	MID2,MID1	KIRC
BP	protein localization to synapse	69	4	0.0258565	ZDHHC15,GPC4,IQSEC2,GRIPAP1	KIRC
BP	determination of left/right asymmetry in nervous system	2	1	0.0334472	ZIC3	KIRC
BP	protein deacylation	132	6	0.0288189	HDAC6,MSL3,FLNA,RBBP7,SUV39H1,TBL1X	KIRC
BP	very long-chain fatty-acyl-CoA metabolic process	2	1	0.037176	ABCD1	KIRC
BP	very long-chain fatty-acyl-CoA catabolic process	1	1	0.0197251	ABCD1	KIRC
BP	histone H3-K9 trimethylation	17	3	0.00381494	MECP2,ATRX,SUV39H1	KIRC
BP	synaptic vesicle recycling	78	4	0.0401832	OPHN1,NLGN3,GRIPAP1,SYP	KIRC
BP	TORC2 signaling	13	2	0.0194238	OTUD5,USP9X	KIRC
BP	cell migration involved in gastrulation	14	2	0.0224999	AMOT,GPC3	KIRC
BP	neurotransmitter catabolic process	10	2	0.0115717	MAOA,MAOB	KIRC
BP	regulation of protein catabolic process	357	15	0.00177334	BCAP31,AMER1,ASB9,FLNA,FMR1,GPC3,SNX12,UBQLN2,MSN,MTM1,OPHN1,RNF128,USP9X,CUL4B,OGT	KIRC
BP	negative regulation of protein catabolic process	107	6	0.0113421	FLNA,SNX12,MTM1,OPHN1,USP9X,OGT	KIRC
BP	regulation of fatty acid biosynthetic process	49	3	0.0490736	ABCD1,MID1IP1,RGN	KIRC
BP	cellular biogenic amine catabolic process	16	3	0.00254129	MAOA,MAOB,SAT1	KIRC
BP	cristae formation	18	2	0.0376153	TAFAZZIN,APOO	KIRC
BP	dopamine metabolic process	39	3	0.0278387	MAOA,MAOB,ATP7A	KIRC
BP	dopamine catabolic process	7	2	0.00633695	MAOA,MAOB	KIRC
BP	catecholamine catabolic process	7	2	0.00633695	MAOA,MAOB	KIRC
BP	pigment metabolic process	79	4	0.0482901	PGRMC1,ABCB7,CITED1,ATP7A	KIRC
BP	sequestering of actin monomers	9	2	0.00968203	TMSB15A,TMSB4X	KIRC
BP	positive regulation of I-kappaB kinase/NF-kappaB signaling	187	8	0.0176927	PIM2,MID2,EDA,EEF1D,FLNA,TAB3,TSPAN6,IKBKG	KIRC
BP	sno(s)RNA processing	14	2	0.0259859	DKC1,RNF113A	KIRC
BP	negative regulation of protein-containing complex disassembly	80	4	0.0401202	HDAC6,FGF13,MID1,MID1IP1	KIRC
BP	pigmentation	112	5	0.0473045	ATP6AP2,EDA,SHROOM2,CITED1,ATP7A	KIRC
BP	regulation of RNA splicing	175	7	0.0379891	PQBP1,FMR1,AFF2,HNRNPH2,MBNL3,RBM3,RBM10,FAM50A	KIRC
BP	histone H4 acetylation	74	4	0.0412234	MSL3,HCFC1,OGT,JADE3	KIRC
BP	histone H4-K5 acetylation	16	3	0.00268389	HCFC1,OGT,JADE3	KIRC
BP	histone H4-K8 acetylation	16	3	0.00268389	HCFC1,OGT,JADE3	KIRC
BP	histone H4-K16 acetylation	21	3	0.00572607	MSL3,HCFC1,OGT	KIRC
BP	regulation of respiratory system process	15	2	0.0277817	MECP2,NLGN3	KIRC
BP	regulation of cellular component biogenesis	938	25	0.0148094	HDAC6,TMSB15A,WDR45,SLITRK4,DOCK11,ABCB7,GPC4,FLNA,FMR1,IL1RAPL2,SRPX2,GPM6B,UBQLN2,HCFC1,ARHGAP6,MECP2,MSN,MTM1,PAK3,ATP7A,NLGN3,GNL3L,CDKL5,TMSB4X,FRMD7	KIRC
BP	cellular amine metabolic process	105	6	0.0099235	MAOA,MAOB,MECP2,ATP7A,SAT1,SMS	KIRC
BP	'de novo' CTP biosynthetic process	2	1	0.0315386	CTPS2	KIRC
BP	cellular biosynthetic process	5528	111	0.0357639	ZBTB33,HDAC6,PQBP1,CDX4,ZNF275,PGRMC1,MAGED2,MSL3,PIM2,MID2,WDR45,HDX,FOXR2,SPIN4,ZXDB,ZDHHC15,SPIN3,ARX,DKC1,DMD,TSC22D3,EDA,EEF1D,ELF4,ELK1,ZNF449,ABCD1,ACSL4,ABCB7,PHF8,FLNA,FMR1,FTSJ1,GK,GLA,HTATSF1,GLUD1,MCTS1,HCFC1,HMGB3,ZNF81,IGSF1,AR,ZCCHC13,MIR98,MAGEB2,MAOB,MECP2,FOXO4,CITED1,MTM1,NDUFA1,SPIN2B,NONO,OCRL,PAK3,ZDHHC9,CDK16,MBTPS2,ARMCX3,ATP7A,TAF7L,NDUFB11,GNL3L,POU3F4,ATRX,BCOR,TMLHE,ZC…	KIRC
BP	cellular nitrogen compound biosynthetic process	4613	97	0.0174236	ZBTB33,HDAC6,PQBP1,CDX4,ZNF275,PGRMC1,MAGED2,MSL3,PIM2,MID2,HDX,FOXR2,SPIN4,ZXDB,SPIN3,ARX,DKC1,DMD,TSC22D3,EDA,EEF1D,ELF4,ELK1,ZNF449,ACSL4,ABCB7,PHF8,FLNA,FMR1,FTSJ1,GLA,HTATSF1,MCTS1,HCFC1,HMGB3,ZNF81,IGSF1,AR,ZCCHC13,MIR98,MAGEB2,MECP2,FOXO4,CITED1,NDUFA1,SPIN2B,NONO,PAK3,CDK16,MBTPS2,ARMCX3,TAF7L,NDUFB11,GNL3L,POU3F4,ATRX,BCOR,TMLHE,ZC4H2,MOSPD1,PRPS2,CTPS2,RBBP7,RBM3,RPL10,RPL39,RPS6KA3,SAT…	KIRC
BP	early endosome to late endosome transport	42	3	0.039592	FLNA,SNX12,MSN	KIRC
BP	establishment of epithelial cell apical/basal polarity	17	2	0.0334746	MSN,OPHN1	KIRC
BP	negative regulation of integrin biosynthetic process	2	1	0.0318822	AR	KIRC
BP	positive regulation of fatty acid biosynthetic process	23	3	0.00774529	ABCD1,MID1IP1,RGN	KIRC
BP	positive regulation of integrin biosynthetic process	3	1	0.0362783	AR	KIRC
BP	positive regulation of protein catabolic process	209	9	0.0112867	BCAP31,AMER1,ASB9,FMR1,GPC3,UBQLN2,MSN,RNF128,CUL4B	KIRC
BP	positive regulation of axon extension	38	3	0.0235052	GDI1,L1CAM,CDKL5	KIRC
BP	negative regulation of proteolysis	337	10	0.0472362	HDAC6,GPC3,PCSK1N,SNX12,XIAP,MTM1,OPHN1,RPS6KA3,USP9X,OGT	KIRC
BP	positive regulation of fatty acid metabolic process	40	3	0.0308918	ABCD1,MID1IP1,RGN	KIRC
BP	negative regulation of nucleobase-containing compound metabolic process	1475	36	0.0193213	ZBTB33,HDAC6,CDX4,MAGED2,ARX,DKC1,FANCB,FLNA,FMR1,HCFC1,AR,MAGEB2,MECP2,CITED1,NONO,SHLD2,GNL3L,ATRX,BCOR,RADX,MOSPD1,RBBP7,RPL10,BCORL1,TSPYL2,ZNF674,SUV39H1,TBL1X,NKAP,USP9X,RBM10,KDM5C,UXT,PHF6,OGT,RGN,MAGED1	KIRC
BP	pigment biosynthetic process	56	4	0.0187365	PGRMC1,ABCB7,CITED1,ATP7A	KIRC
BP	heterocycle metabolic process	5877	115	0.038178	ZBTB33,HDAC6,HUWE1,PQBP1,CDX4,CETN2,ZNF275,PGRMC1,MAGED2,MSL3,PIM2,MID2,RNASE11,HDX,FOXR2,SPIN4,ZXDB,USP51,SPIN3,ARX,DKC1,DNASE1L1,TSC22D3,EDA,ELF4,ELK1,ZNF449,ABCD1,ACSL4,FANCB,ABCB7,PHF8,FLNA,FMR1,AFF2,ACOT9,FTSJ1,G6PD,SRPK3,APEX2,HTATSF1,HCFC1,HMGB3,HNRNPH2,ZNF81,IGSF1,AR,MIR98,MAGEB2,MECP2,FOXO4,CITED1,NDUFA1,SPIN2B,NONO,PAK3,CDK16,MBTPS2,ARMCX3,RBMX2,PGK1,PIN4,ATP7A,TAF7L,SHLD2,NDUFB11,GNL3L…	KIRC
BP	phospholipid dephosphorylation	45	4	0.00745992	MTM1,OCRL,MTMR8,MTMR1	KIRC
BP	phosphatidylinositol dephosphorylation	32	4	0.00211844	MTM1,OCRL,MTMR8,MTMR1	KIRC
BP	mitochondrion transport along microtubule	26	3	0.0101411	HDAC6,ARMCX3,UXT	KIRC
BP	spermatocyte division	2	1	0.0393349	TAFAZZIN	KIRC
BP	endosomal lumen acidification	14	2	0.0289352	ATP6AP2,ATP6AP1	KIRC
BP	developmental cell growth	227	8	0.0280183	HDAC6,FGF13,G6PD,GDI1,L1CAM,NLGN3,CDKL5,USP9X	KIRC
BP	neuron development	1098	26	0.033193	HDAC6,PQBP1,SLITRK4,ZDHHC15,ARX,DMD,EFNB1,FGF13,FLNA,FMR1,GDI1,GPM6B,L1CAM,MCF2,MECP2,OPHN1,PAK3,CDK16,ATP7A,NLGN3,ZC4H2,CDKL5,SYN1,USP9X,CUL4B,FRMD7	KIRC
BP	cell morphogenesis involved in neuron differentiation	559	15	0.031659	HDAC6,PQBP1,SLITRK4,ZDHHC15,ARX,EFNB1,FGF13,GDI1,L1CAM,MCF2,OPHN1,PAK3,NLGN3,CDKL5,USP9X	KIRC
BP	collateral sprouting	24	2	0.0470728	HDAC6,FGF13	KIRC
BP	axon extension	122	5	0.0479895	GDI1,L1CAM,NLGN3,CDKL5,USP9X	KIRC
BP	neuron projection morphogenesis	619	16	0.0360424	HDAC6,PQBP1,SLITRK4,ZDHHC15,ARX,EFNB1,FGF13,GDI1,L1CAM,MCF2,OPHN1,PAK3,ATP7A,NLGN3,CDKL5,USP9X	KIRC
BP	cell projection morphogenesis	640	16	0.047261	HDAC6,PQBP1,SLITRK4,ZDHHC15,ARX,EFNB1,FGF13,GDI1,L1CAM,MCF2,OPHN1,PAK3,ATP7A,NLGN3,CDKL5,USP9X	KIRC
BP	regulation of axonogenesis	155	6	0.0341801	FGF13,GDI1,L1CAM,MCF2,PAK3,CDKL5	KIRC
BP	regulation of biological process	11390	204	0.0458063	ZBTB33,FMR1-AS1,HDAC6,FTX,HUWE1,PQBP1,BCAP31,ATP6AP2,RRAGB,CDX4,CETN2,ZNF275,MAGED2,MSL3,TMSB15A,PIM2,MID2,WDR45,SLITRK4,DGKK,AMER1,HDX,PTCHD1,FOXR2,DOCK11,SPIN4,ASB9,AMOT,ZXDB,MOSPD2,ZDHHC15,USP51,SPIN3,ARX,DKC1,DLG3,DMD,TSC22D3,DUSP1,DUSP9,EDA,EEF1D,EFNB1,ELF4,ELK1,EMD,ZNF449,ABCD1,ACSL4,FANCB,ABCB7,GPC4,FGF13,FHL1,CNKSR2,IQSEC2,PHF8,FLNA,FMR1,AFF2,LDOC1,G6PD,GABRA3,GABRE,GABRG3,TAB3,EGFL6,IL1R…	KIRC
BP	regulation of cellular process	10555	198	0.00866416	ZBTB33,FMR1-AS1,HDAC6,HUWE1,PQBP1,BCAP31,ATP6AP2,RRAGB,CDX4,CETN2,ZNF275,MAGED2,MSL3,TMSB15A,PIM2,MID2,WDR45,SLITRK4,DGKK,AMER1,HDX,PTCHD1,FOXR2,DOCK11,SPIN4,ASB9,AMOT,ZXDB,MOSPD2,ZDHHC15,USP51,SPIN3,ARX,DKC1,DLG3,DMD,TSC22D3,DUSP1,DUSP9,EDA,EEF1D,EFNB1,ELF4,ELK1,EMD,ZNF449,ABCD1,ACSL4,FANCB,ABCB7,GPC4,FGF13,FHL1,CNKSR2,IQSEC2,PHF8,FLNA,FMR1,AFF2,LDOC1,G6PD,GABRA3,GABRE,GABRG3,TAB3,EGFL6,IL1RAPL2…	KIRC
BP	regulation of synapse structure or activity	213	9	0.00721372	SLITRK4,ZDHHC15,GPC4,IL1RAPL2,SRPX2,PAK3,NLGN3,GRIPAP1,CDKL5	KIRC
BP	regulation of synapse organization	207	9	0.00594363	SLITRK4,ZDHHC15,GPC4,IL1RAPL2,SRPX2,PAK3,NLGN3,GRIPAP1,CDKL5	KIRC
BP	synapse organization	426	19	6.17e-05	HDAC6,SLITRK4,ZDHHC15,GPC4,FGF13,CNKSR2,FLNA,IL1RAPL2,SRPX2,L1CAM,MECP2,OPHN1,PAK3,NLGN3,ZC4H2,GRIPAP1,CDKL5,SYN1,CHRDL1	KIRC
BP	protein stabilization	210	8	0.0330369	PIM2,FLNA,HCFC1,USP27X,TBL1X,VBP1,USP9X,UXT	KIRC
BP	regulation of small GTPase mediated signal transduction	294	9	0.0438933	AMOT,IQSEC2,LPAR4,ARHGAP6,MCF2,OPHN1,OGT,FRMD7,STARD8	KIRC
BP	regulation of cellular component organization	2322	53	0.0139805	HDAC6,HUWE1,PQBP1,TMSB15A,WDR45,SLITRK4,DOCK11,ZDHHC15,DKC1,DUSP1,ABCB7,GPC4,FGF13,FHL1,PHF8,FLNA,FMR1,G6PD,IL1RAPL2,GDI1,GPC3,SRPX2,GPM6B,SLC25A5,SNX12,UBQLN2,HCFC1,EHD2,AR,L1CAM,ARHGAP6,MIR98,MCF2,MECP2,MID1,MSN,MTM1,TBC1D25,OPHN1,PAK3,ATP7A,NLGN3,GNL3L,ATRX,GRIPAP1,MID1IP1,RBBP7,RPS6KA3,TSPYL2,CDKL5,TMSB4X,VBP1,APLN,FRMD7	KIRC
BP	negative regulation of cellular component organization	697	21	0.00719684	HDAC6,HUWE1,TMSB15A,DUSP1,FGF13,PHF8,FLNA,GDI1,SLC25A5,UBQLN2,AR,ARHGAP6,MIR98,MCF2,MID1,MTM1,GNL3L,ATRX,MID1IP1,TMSB4X,VBP1,FRMD7	KIRC
BP	positive regulation of cellular component organization	1037	25	0.0490523	WDR45,SLITRK4,DOCK11,ZDHHC15,DKC1,ABCB7,FLNA,FMR1,GDI1,GPC3,SRPX2,SLC25A5,EHD2,AR,L1CAM,MECP2,MSN,PAK3,ATP7A,NLGN3,GNL3L,ATRX,CDKL5,APLN,FRMD7	KIRC
BP	negative regulation of smooth muscle cell differentiation	22	2	0.0347836	MECP2,FOXO4	KIRC
BP	regulation of nitrogen compound metabolic process	5509	113	0.0135227	ZBTB33,HDAC6,HUWE1,PQBP1,BCAP31,CDX4,ZNF275,MAGED2,MSL3,PIM2,MID2,AMER1,HDX,FOXR2,SPIN4,ASB9,ZXDB,USP51,SPIN3,ARX,DKC1,DLG3,DMD,TSC22D3,DUSP1,EDA,ELF4,ELK1,ZNF449,FANCB,ABCB7,FGF13,PHF8,FLNA,FMR1,AFF2,G6PD,SRPK3,GLA,GPC3,HTATSF1,PCSK1N,SNX12,UBQLN2,HCFC1,HMGB3,HNRNPH2,XIAP,ZNF81,IGSF1,AR,ZCCHC13,MIR98,MAGEB2,MAOB,MECP2,FOXO4,CITED1,MSN,MTM1,SPIN2B,NONO,OPHN1,PAK3,CDK16,MBTPS2,ARMCX3,SHLD2,GNL3L,P…	KIRC
BP	localization	5154	102	0.0487097	HDAC6,HUWE1,BCAP31,ATP6AP2,TIMM17B,RRAGB,CETN2,MAGED2,TMSB15A,MID2,WDR45,PRAF2,CLCN4,CLCN5,AMOT,ZDHHC15,TIMM8A,DKC1,DLG3,DMD,EMD,SLC25A43,ABCD1,ACSL4,ABCB7,GPC4,FGF13,FHL1,IQSEC2,SEPTIN6,FLNA,FMR1,G6PD,GABRA3,GABRE,GABRG3,GDI1,GJB1,GPC3,GLUD1,GPM6B,YIPF6,GRIA3,SLC25A5,SNX12,UBQLN2,SH3KBP1,EHD2,RAB41,SHROOM2,AR,SLC25A53,MIR98,MAOB,MECP2,MID1,CITED1,MSN,MTM1,OPHN1,ZDHHC9,LUZP4,CDK16,ARMCX3,PLP2,ATP…	KIRC
BP	regulation of RNA metabolic process	3561	78	0.0109637	ZBTB33,HDAC6,PQBP1,CDX4,ZNF275,MAGED2,MSL3,PIM2,MID2,HDX,FOXR2,SPIN4,ZXDB,SPIN3,ARX,DKC1,TSC22D3,EDA,ELF4,ELK1,ZNF449,PHF8,FLNA,FMR1,AFF2,SRPK3,HTATSF1,HCFC1,HMGB3,HNRNPH2,ZNF81,IGSF1,AR,MIR98,MAGEB2,MECP2,FOXO4,CITED1,SPIN2B,NONO,CDK16,MBTPS2,ARMCX3,POU3F4,ATRX,BCOR,MBNL3,ZC4H2,MOSPD1,RBBP7,RBM3,RPL10,RPS6KA3,BCORL1,ZNF674,SUV39H1,TBL1X,TFE3,TMSB4X,ZIC3,ZNF711,ZNF182,ZNF41,ZNF75D,HMGN5,NKAP,USP9…	KIRC
BP	protein polymerization	276	9	0.0404349	TMSB15A,DIAPH2,FGF13,ARHGAP6,MECP2,PAK3,MID1IP1,TMSB4X,MAP7D3	KIRC
BP	regulation of ligase activity	12	3	0.00109547	MID1IP1,TMSB4X,RGN	KIRC
BP	positive regulation of ligase activity	10	2	0.0133552	MID1IP1,TMSB4X	KIRC
BP	negative regulation of ligase activity	2	1	0.0326034	RGN	KIRC
BP	negative regulation of cytoskeleton organization	158	8	0.00389582	HDAC6,TMSB15A,FGF13,ARHGAP6,MID1,MID1IP1,TMSB4X,FRMD7	KIRC
BP	elastin biosynthetic process	2	1	0.0415632	ATP7A	KIRC
BP	histone H3-K9 methylation	35	3	0.0245698	MECP2,ATRX,SUV39H1	KIRC
BP	regulation of histone H3-K4 methylation	39	3	0.026843	HCFC1,BCOR,OGT	KIRC
BP	negative regulation of neurotransmitter uptake	3	1	0.044375	GPM6B	KIRC
BP	regulation of neurotransmitter transport	104	5	0.032584	FMR1,GPM6B,SYN1,SYP,CASK	KIRC
BP	negative regulation of neurotransmitter transport	14	2	0.0228162	FMR1,GPM6B	KIRC
BP	negative regulation of serotonin uptake	3	1	0.044375	GPM6B	KIRC
BP	cellular localization	3259	70	0.0314818	HDAC6,HUWE1,BCAP31,TIMM17B,RRAGB,CETN2,TMSB15A,MID2,WDR45,PRAF2,AMOT,ZDHHC15,TIMM8A,DKC1,DLG3,DMD,EMD,ABCD1,ACSL4,GPC4,FGF13,IQSEC2,SEPTIN6,FLNA,FMR1,GDI1,GPC3,GLUD1,GPM6B,YIPF6,SLC25A5,SNX12,EHD2,RAB41,SHROOM2,AR,MIR98,MECP2,MID1,CITED1,MSN,MTM1,OPHN1,ZDHHC9,CDK16,ARMCX3,ATP6AP1,NLGN3,GNL3L,ATRX,GRIPAP1,CLTRN,RP2,STEEP1,TRAPPC2,UPF3B,SYN1,SYP,TMSB4X,RNF128,USP9X,UBL4A,UXT,IKBKG,CASK,AKAP4,CCDC12…	KIRC
BP	mitochondrion localization	49	4	0.0111612	HDAC6,MTM1,ARMCX3,UXT	KIRC
BP	establishment of mitochondrion localization	29	3	0.0147174	HDAC6,ARMCX3,UXT	KIRC
BP	regulation of synapse assembly	103	5	0.0214403	SLITRK4,GPC4,IL1RAPL2,SRPX2,NLGN3	KIRC
BP	copper ion homeostasis	19	2	0.0476118	XIAP,ATP7A	KIRC
BP	transmembrane transport	1530	38	0.00998078	ATP6AP2,TIMM17B,PRAF2,CLCN4,CLCN5,DMD,SLC25A43,ABCD1,ABCB7,FGF13,FHL1,FLNA,FMR1,G6PD,GABRA3,GABRE,GABRG3,GJB1,GPC3,GRIA3,SLC25A5,SHROOM2,SLC25A53,PLP2,ATP6AP1,ATP7A,NLGN3,CLTRN,SLC16A2,TMSB4X,SLC35A2,UQCRH,CACNA1F,SLC10A3,MAGT1,SLC7A3,SLC25A14,RGN	KIRC
BP	copper ion export	2	1	0.0423688	ATP7A	KIRC
BP	regulation of postsynaptic membrane potential	144	6	0.0310129	GABRA3,GABRE,GABRG3,GRIA3,MECP2,NLGN3	KIRC
BP	excitatory postsynaptic potential	123	5	0.0496435	GABRA3,GABRE,GABRG3,MECP2,NLGN3	KIRC
BP	apelin receptor signaling pathway	2	1	0.0418493	APLN	KIRC
BP	head development	793	20	0.0350889	ATP6AP2,PTCHD1,ARX,FGF13,PHF8,AFF2,G6PD,GLUD1,SHROOM2,MAOB,MECP2,CITED1,OPHN1,ATP7A,POU3F4,ATRX,AVPR2,SHROOM4,PCDH19,RBBP7,ZIC3	KIRC
BP	prostate induction	1	1	0.0116188	AR	KIRC
BP	prostate field specification	1	1	0.0116188	AR	KIRC
BP	activation of prostate induction by androgen receptor signaling pathway	1	1	0.0116188	AR	KIRC
BP	lateral sprouting involved in mammary gland duct morphogenesis	2	1	0.0227814	AR	KIRC
BP	labyrinthine layer development	46	3	0.0394218	CDX4,CITED1,NSDHL	KIRC
BP	tertiary branching involved in mammary gland duct morphogenesis	3	1	0.0438229	AR	KIRC
BP	positive regulation of epithelial cell proliferation involved in prostate gland development	3	1	0.0449691	AR	KIRC
BP	regulation of apoptosis involved in tissue homeostasis	1	1	0.0189565	XIAP	KIRC
BP	trachea submucosa development	2	1	0.0318165	EDA	KIRC
BP	trachea gland development	2	1	0.0318165	EDA	KIRC
BP	regulation of rDNA heterochromatin formation	2	1	0.0369811	PHF8	KIRC
BP	negative regulation of ribosomal DNA heterochromatin formation	2	1	0.0369811	PHF8	KIRC
BP	axon development	486	14	0.0214573	HDAC6,SLITRK4,ARX,EFNB1,FGF13,FLNA,GDI1,L1CAM,MCF2,OPHN1,PAK3,NLGN3,CDKL5,USP9X	KIRC
BP	mitochondrion disassembly	92	7	0.00114932	HDAC6,HUWE1,WDR45,SLC25A5,FUNDC2,TAFAZZIN,OGT	KIRC
BP	Golgi lumen acidification	12	2	0.0211835	ATP6AP2,ATP6AP1	KIRC
BP	selective autophagy	82	5	0.0153985	HDAC6,HUWE1,SLC25A5,TAFAZZIN,OGT	KIRC
BP	process utilizing autophagic mechanism	545	17	0.0164606	HDAC6,HUWE1,RRAGB,PIM2,MID2,WDR45,TAB3,SLC25A5,UBQLN2,MTM1,TBC1D25,CDK16,MTMR8,FUNDC2,TAFAZZIN,OGT,IKBKG	KIRC
BP	protein localization to postsynapse	36	4	0.00327002	ZDHHC15,GPC4,IQSEC2,GRIPAP1	KIRC
BP	regulation of biological quality	3683	77	0.017337	HDAC6,BCAP31,ATP6AP2,TMSB15A,PIM2,SLITRK4,DGKK,DOCK11,ZDHHC15,DKC1,DLG3,DMD,TSC22D3,ABCD1,ACSL4,ABCB7,GPC4,FGF13,FHL1,IQSEC2,FLNA,FMR1,G6PD,GABRA3,GABRE,GABRG3,IL1RAPL2,GDI1,SRPX2,PCSK1N,GLUD1,GPM6B,LPAR4,GRIA3,SLC25A5,HCFC1,XIAP,VSIG1,AR,L1CAM,USP27X,MIR98,MAOA,MAOB,MECP2,MSN,MTM1,OPHN1,PAK3,CDK16,ARMCX1,ATP6AP1,ATP7A,NLGN3,GNL3L,AVPR2,GRIPAP1,CLTRN,SLC16A2,FUNDC2,CDKL5,SUV39H1,SYN1,SYP,TBL1X,TF…	KIRC
BP	negative regulation of tooth mineralization	2	1	0.0195609	BCOR	KIRC
BP	protein localization to chromosome, telomeric region	30	3	0.0178344	DKC1,GNL3L,ATRX	KIRC
BP	T cell aggregation	2	1	0.0317319	MSN	KIRC
BP	protein K63-linked deubiquitination	38	3	0.0312782	USP27X,OTUD5,USP9X	KIRC
BP	cellular macromolecule localization	2418	54	0.0340761	HDAC6,HUWE1,BCAP31,TIMM17B,RRAGB,CETN2,TMSB15A,MID2,WDR45,PRAF2,AMOT,ZDHHC15,TIMM8A,DKC1,DLG3,DMD,EMD,ACSL4,GPC4,FGF13,IQSEC2,SEPTIN6,FLNA,GDI1,GPC3,GLUD1,GPM6B,SNX12,EHD2,RAB41,SHROOM2,AR,MIR98,MECP2,MID1,MSN,MTM1,ZDHHC9,CDK16,ARMCX3,ATP6AP1,GNL3L,ATRX,GRIPAP1,CLTRN,RP2,TMSB4X,RNF128,USP9X,UBL4A,CASK,AKAP4,CCDC120,CHRDL1,RAB9A,MAGED1	KIRC
BP	misfolded protein transport	1	1	0.0182223	HDAC6	KIRC
BP	polyubiquitinated protein transport	1	1	0.0182223	HDAC6	KIRC
BP	polyubiquitinated misfolded protein transport	1	1	0.0182223	HDAC6	KIRC
BP	Hsp90 deacetylation	1	1	0.0182223	HDAC6	KIRC
BP	regulation of proline transport	2	1	0.0320959	CLTRN	KIRC
BP	response to interleukin-9	2	1	0.024451	CITED1	KIRC
BP	response to interleukin-11	2	1	0.0233764	CITED1	KIRC
BP	protein K48-linked deubiquitination	35	3	0.0273014	USP27X,OTUD5,USP9X	KIRC
BP	cellular response to testosterone stimulus	10	3	0.000591304	ELK1,AR,MSN	KIRC
BP	vocalization behavior	18	2	0.025748	SRPX2,NLGN3	KIRC
BP	cellular component organization or biogenesis	6288	128	0.0137718	HDAC6,HUWE1,PQBP1,BCAP31,ATP6AP2,TIMM17B,CETN2,STAG2,MSL3,TMSB15A,WDR45,CLCN4,SLITRK4,DOCK11,AMOT,ZDHHC15,H2BW1,TIMM8A,ARX,DIAPH2,DKC1,DMD,DUSP1,EFNB1,EMD,VMA21,ABCD1,ABCB7,GPC4,FGF13,FHL1,CNKSR2,IQSEC2,PHF8,SEPTIN6,FLNA,FMR1,AFF2,G6PD,EGFL6,IL1RAPL2,SRPK3,GDI1,GJB1,GPC3,SRPX2,HTATSF1,GPM6B,MCTS1,SLC25A5,SNX12,UBQLN2,SH3KBP1,HCFC1,EHD2,HMGB3,SHROOM2,AR,DNAJB13,L1CAM,ARHGAP6,PRICKLE3,MIR98,MCF2,ME…	KIRC
BP	seminiferous tubule development	15	2	0.0309521	AR,ATRX	KIRC
BP	protein localization to membrane	567	16	0.0413301	ZDHHC15,TIMM8A,DLG3,GPC4,FGF13,IQSEC2,FLNA,GDI1,GPC3,EHD2,AR,ZDHHC9,ATP6AP1,GRIPAP1,UBL4A,CHRDL1	KIRC
BP	regulation of primary metabolic process	5667	115	0.017001	ZBTB33,HDAC6,HUWE1,PQBP1,BCAP31,CDX4,ZNF275,MAGED2,MSL3,PIM2,MID2,AMER1,HDX,FOXR2,SPIN4,ASB9,ZXDB,USP51,SPIN3,ARX,DKC1,DLG3,DMD,TSC22D3,DUSP1,EDA,ELF4,ELK1,ZNF449,ABCD1,FANCB,FGF13,PHF8,FLNA,FMR1,AFF2,G6PD,SRPK3,GPC3,HTATSF1,PCSK1N,SNX12,UBQLN2,HCFC1,HMGB3,HNRNPH2,XIAP,ZNF81,IGSF1,AR,ZCCHC13,MIR98,MAGEB2,MAOB,MECP2,FOXO4,CITED1,MSN,MTM1,SPIN2B,NONO,OPHN1,PAK3,CDK16,MBTPS2,ARMCX3,SHLD2,GNL3L,POU3F…	KIRC
BP	establishment of epithelial cell polarity	34	3	0.0177131	AMOT,MSN,OPHN1	KIRC
BP	positive regulation of canonical Wnt signaling pathway	107	6	0.00794793	ATP6AP2,AMER1,EDA,GPC3,XIAP,TBL1X	KIRC
BP	nucleic acid metabolic process	5180	102	0.0421965	ZBTB33,HDAC6,HUWE1,PQBP1,CDX4,CETN2,ZNF275,MAGED2,MSL3,PIM2,MID2,RNASE11,HDX,FOXR2,SPIN4,ZXDB,USP51,SPIN3,ARX,DKC1,DNASE1L1,TSC22D3,EDA,ELF4,ELK1,ZNF449,FANCB,PHF8,FLNA,FMR1,AFF2,FTSJ1,SRPK3,APEX2,HTATSF1,HCFC1,HMGB3,HNRNPH2,ZNF81,IGSF1,AR,MIR98,MAGEB2,MECP2,FOXO4,CITED1,SPIN2B,NONO,PAK3,CDK16,MBTPS2,ARMCX3,RBMX2,PIN4,TAF7L,SHLD2,GNL3L,POU3F4,ATRX,BCOR,RADX,RBM41,MBNL3,ZC4H2,MOSPD1,RBBP7,RBM3,RPL…	KIRC
BP	receptor localization to synapse	56	4	0.0143183	DLG3,GPC4,IQSEC2,GRIPAP1	KIRC
BP	telomeric repeat-containing RNA transcription	1	1	0.0219342	ATRX	KIRC
BP	telomeric repeat-containing RNA transcription by RNA polymerase II	1	1	0.0219342	ATRX	KIRC
BP	supramolecular fiber organization	794	21	0.022904	HDAC6,TMSB15A,DIAPH2,FGF13,FLNA,SH3KBP1,SHROOM2,ARHGAP6,MECP2,MID1,MTM1,PAK3,ATP7A,GDPD2,SHROOM4,MID1IP1,TMSB4X,VBP1,MAP7D3,USP9X,FRMD7	KIRC
BP	L-lysine import across plasma membrane	2	1	0.040578	SLC7A3	KIRC
BP	L-ornithine import across plasma membrane	1	1	0.0224276	SLC7A3	KIRC
BP	nucleic acid-templated transcription	3372	72	0.0260287	ZBTB33,HDAC6,PQBP1,CDX4,ZNF275,MAGED2,MSL3,PIM2,MID2,HDX,FOXR2,SPIN4,ZXDB,SPIN3,ARX,TSC22D3,EDA,ELF4,ELK1,ZNF449,PHF8,FLNA,HTATSF1,HCFC1,HMGB3,ZNF81,IGSF1,AR,MAGEB2,MECP2,FOXO4,CITED1,SPIN2B,NONO,CDK16,MBTPS2,ARMCX3,TAF7L,POU3F4,ATRX,BCOR,ZC4H2,MOSPD1,RBBP7,RPL10,RPS6KA3,BCORL1,ZNF674,SUV39H1,TBL1X,TFE3,TMSB4X,ZIC3,ZNF711,ZNF182,ZNF41,ZNF75D,HMGN5,NKAP,USP9X,RBM10,KDM5C,UXT,PHF6,OGT,IKBKG,PIR,CAS…	KIRC
BP	anion transmembrane transport	262	11	0.00522542	PRAF2,CLCN4,CLCN5,GABRA3,GABRE,GABRG3,SLC25A5,CLTRN,SLC35A2,SLC7A3,SLC25A14	KIRC
BP	inorganic ion transmembrane transport	907	23	0.0295283	ATP6AP2,CLCN4,CLCN5,DMD,ABCB7,FGF13,FHL1,FLNA,FMR1,G6PD,GABRA3,GABRE,GABRG3,SLC25A5,SHROOM2,ATP6AP1,ATP7A,TMSB4X,UQCRH,CACNA1F,MAGT1,SLC25A14,RGN	KIRC
BP	inorganic anion transmembrane transport	126	6	0.017883	CLCN4,CLCN5,GABRA3,GABRE,GABRG3,SLC25A14	KIRC
BP	regulation of neurotransmitter receptor localization to postsynaptic specialization membrane	9	2	0.00991761	GPC4,IQSEC2	KIRC
BP	macromolecule deacylation	136	6	0.032039	HDAC6,MSL3,FLNA,RBBP7,SUV39H1,TBL1X	KIRC
BP	positive regulation of mitophagy in response to mitochondrial depolarization	10	2	0.0131368	HDAC6,HUWE1	KIRC
BP	vesicle-mediated transport between endosomal compartments	45	3	0.0457033	FLNA,SNX12,MSN	KIRC
BP	excitatory chemical synaptic transmission	10	2	0.00840618	PTCHD1,CHRDL1	KIRC
BP	inhibitory chemical synaptic transmission	2	1	0.0406157	PTCHD1	KIRC
BP	presynapse assembly	48	4	0.00638792	SLITRK4,GPC4,IL1RAPL2,NLGN3	KIRC
BP	regulation of postsynaptic membrane neurotransmitter receptor levels	63	5	0.0045578	DLG3,GPC4,IQSEC2,OPHN1,GRIPAP1	KIRC
BP	regulation of neurotransmitter receptor transport, endosome to postsynaptic membrane	3	1	0.0490512	GRIPAP1	KIRC
BP	regulation of recycling endosome localization within postsynapse	1	1	0.0219798	GRIPAP1	KIRC
BP	presynapse organization	51	4	0.0080973	SLITRK4,GPC4,IL1RAPL2,NLGN3	KIRC
BP	postsynapse organization	161	8	0.00471101	HDAC6,ZDHHC15,CNKSR2,OPHN1,PAK3,NLGN3,CDKL5,CHRDL1	KIRC
BP	regulation of presynapse organization	34	3	0.0152892	SLITRK4,GPC4,IL1RAPL2	KIRC
BP	maintenance of mitotic sister chromatid cohesion, telomeric	2	1	0.0358503	ATRX	KIRC
BP	mitotic sister chromatid cohesion, telomeric	2	1	0.0358503	ATRX	KIRC
BP	synaptic vesicle cycle	190	7	0.0394282	FMR1,OPHN1,NLGN3,GRIPAP1,SYN1,SYP,CASK	KIRC
BP	protein localization to postsynaptic specialization membrane	16	2	0.0316144	GPC4,IQSEC2	KIRC
BP	endosome to plasma membrane protein transport	15	2	0.0274146	ATP6AP1,GRIPAP1	KIRC
BP	neurotransmitter receptor localization to postsynaptic specialization membrane	16	2	0.0316144	GPC4,IQSEC2	KIRC
BP	plasma membrane bounded cell projection morphogenesis	635	16	0.0442475	HDAC6,PQBP1,SLITRK4,ZDHHC15,ARX,EFNB1,FGF13,GDI1,L1CAM,MCF2,OPHN1,PAK3,ATP7A,NLGN3,CDKL5,USP9X	KIRC
BP	protein targeting to Golgi apparatus	1	1	0.021715	ZDHHC15	KIRC
BP	iron-sulfur cluster export from the mitochondrion	1	1	0.0211177	ABCB7	KIRC
BP	regulation of dosage compensation by inactivation of X chromosome	11	2	0.0164634	MSL3,OGT	KIRC
BP	regulation of histone H3-K9 trimethylation	12	2	0.0200412	MECP2,ATRX	KIRC
BP	positive regulation of cardiolipin metabolic process	2	1	0.0344845	TAFAZZIN	KIRC
BP	negative regulation of long-term synaptic depression	3	1	0.0427007	FMR1	KIRC
BP	regulation of intracellular transport of viral material	3	1	0.0454894	FMR1	KIRC
BP	positive regulation of intracellular transport of viral material	1	1	0.01569	FMR1	KIRC
BP	carbohydrate derivative transport	77	4	0.0461372	ABCD1,GJB1,SLC25A5,SLC35A2	KIRC
BP	lactone biosynthetic process	2	1	0.0392719	RGN	KIRC
BP	thioester transport	2	1	0.0367204	ABCD1	KIRC
BP	organic cyclic compound metabolic process	6162	119	0.0473946	ZBTB33,HDAC6,HUWE1,PQBP1,CDX4,CETN2,ZNF275,PGRMC1,MAGED2,MSL3,PIM2,MID2,RNASE11,HDX,FOXR2,SPIN4,ZXDB,USP51,SPIN3,ARX,DKC1,DNASE1L1,TSC22D3,EDA,ELF4,ELK1,ZNF449,ABCD1,ACSL4,FANCB,ABCB7,PHF8,FLNA,FMR1,AFF2,ACOT9,FTSJ1,G6PD,SRPK3,APEX2,HTATSF1,HCFC1,HMGB3,HNRNPH2,ZNF81,IGSF1,AR,MIR98,MAGEB2,MAOA,MAOB,MECP2,FOXO4,CITED1,NDUFA1,SPIN2B,NONO,PAK3,NSDHL,CDK16,MBTPS2,ARMCX3,RBMX2,PGK1,PIN4,ATP7A,TAF7L,SHL…	KIRC
BP	organic cyclic compound biosynthetic process	4037	87	0.0129665	ZBTB33,HDAC6,PQBP1,CDX4,ZNF275,PGRMC1,MAGED2,MSL3,PIM2,MID2,HDX,FOXR2,SPIN4,ZXDB,SPIN3,ARX,DKC1,TSC22D3,EDA,ELF4,ELK1,ZNF449,ACSL4,ABCB7,PHF8,FLNA,G6PD,HTATSF1,HCFC1,HMGB3,ZNF81,IGSF1,AR,MAGEB2,MECP2,FOXO4,CITED1,NDUFA1,SPIN2B,NONO,PAK3,NSDHL,CDK16,MBTPS2,ARMCX3,ATP7A,TAF7L,NDUFB11,GNL3L,POU3F4,ATRX,BCOR,ZC4H2,MOSPD1,PRPS2,CTPS2,RBBP7,RPL10,RPS6KA3,BCORL1,ZNF674,SUV39H1,TAFAZZIN,TBL1X,TFE3,TMSB4X…	KIRC
BP	organic substance biosynthetic process	5595	113	0.029201	ZBTB33,HDAC6,PQBP1,CDX4,ZNF275,PGRMC1,MAGED2,MSL3,PIM2,MID2,WDR45,HDX,FOXR2,SPIN4,ZXDB,ZDHHC15,SPIN3,ARX,DKC1,DMD,TSC22D3,EDA,EEF1D,ELF4,ELK1,ZNF449,ABCD1,ACSL4,ABCB7,PHF8,FLNA,FMR1,FTSJ1,G6PD,GK,HTATSF1,GLUD1,MCTS1,HCFC1,HMGB3,ZNF81,IGSF1,AR,ZCCHC13,MIR98,MAGEB2,MECP2,FOXO4,CITED1,MTM1,NDUFA1,SPIN2B,NONO,OCRL,PAK3,NSDHL,ZDHHC9,CDK16,MBTPS2,ARMCX3,PGK1,ATP7A,TAF7L,NDUFB11,GNL3L,POU3F4,ATRX,BCOR,T…	KIRC
BP	regulation of telomeric RNA transcription from RNA pol II promoter	1	1	0.0219342	ATRX	KIRC
BP	negative regulation of telomeric RNA transcription from RNA pol II promoter	1	1	0.0219342	ATRX	KIRC
BP	positive regulation of telomeric RNA transcription from RNA pol II promoter	1	1	0.0219342	ATRX	KIRC
BP	organic hydroxy compound catabolic process	75	4	0.0359381	GK,MAOA,MAOB,OCRL	KIRC
BP	negative regulation of proteasomal protein catabolic process	47	4	0.0105835	MTM1,OPHN1,USP9X,OGT	KIRC
BP	negative regulation of protein depolymerization	70	4	0.0243584	HDAC6,FGF13,MID1,MID1IP1	KIRC
BP	regulation of cell junction assembly	203	7	0.0408853	SLITRK4,GPC4,IL1RAPL2,SRPX2,GPM6B,ARHGAP6,NLGN3	KIRC
BP	regulation of protein localization to synapse	20	3	0.00373594	GPC4,IQSEC2,GRIPAP1	KIRC
BP	chloride transmembrane transport	101	5	0.0230577	CLCN4,CLCN5,GABRA3,GABRE,GABRG3	KIRC
BP	iron-sulfur cluster transmembrane transport	1	1	0.0211177	ABCB7	KIRC
BP	regulation of protein linear polyubiquitination	2	1	0.0299717	XIAP	KIRC
BP	positive regulation of protein linear polyubiquitination	2	1	0.0299717	XIAP	KIRC
BP	proton transmembrane transport	149	8	0.00585684	ATP6AP2,CLCN4,CLCN5,SLC25A5,ATP6AP1,ATP7A,TMSB4X,UQCRH	KIRC
BP	regulation of receptor localization to synapse	18	3	0.0035997	GPC4,IQSEC2,GRIPAP1	KIRC
BP	regulation of proline import across plasma membrane	2	1	0.0320959	CLTRN	KIRC
BP	positive regulation of proline import across plasma membrane	2	1	0.0320959	CLTRN	KIRC
BP	regulation of supramolecular fiber organization	373	12	0.0211189	HDAC6,TMSB15A,FGF13,FLNA,ARHGAP6,MECP2,MID1,PAK3,MID1IP1,TMSB4X,VBP1,FRMD7	KIRC
BP	negative regulation of supramolecular fiber organization	162	9	0.00113934	HDAC6,TMSB15A,FGF13,ARHGAP6,MID1,MID1IP1,TMSB4X,VBP1,FRMD7	KIRC
BP	organelle disassembly	137	8	0.00327267	HDAC6,HUWE1,WDR45,MCTS1,SLC25A5,FUNDC2,TAFAZZIN,OGT	KIRC
BP	negative regulation of bone development	1	1	0.0176844	RGN	KIRC
BP	regulation of proteolysis involved in protein catabolic process	223	8	0.0450595	BCAP31,FMR1,UBQLN2,MTM1,OPHN1,USP9X,OGT,RGN	KIRC
BP	negative regulation of proteolysis involved in protein catabolic process	62	4	0.025628	MTM1,OPHN1,USP9X,OGT	KIRC
BP	regulation of ER-associated ubiquitin-dependent protein catabolic process	9	2	0.00981138	BCAP31,UBQLN2	KIRC
BP	positive regulation of ER-associated ubiquitin-dependent protein catabolic process	7	2	0.0052362	BCAP31,UBQLN2	KIRC
BP	regulation of iron-sulfur cluster assembly	1	1	0.0211177	ABCB7	KIRC
BP	positive regulation of iron-sulfur cluster assembly	1	1	0.0211177	ABCB7	KIRC
BP	reactive oxygen species biosynthetic process	59	4	0.0158788	ABCD1,ABCB7,MAOB,PAGE4	KIRC
BP	regulation of reactive oxygen species biosynthetic process	47	3	0.0390392	ABCD1,ABCB7,PAGE4	KIRC
BP	negative regulation of reactive oxygen species biosynthetic process	20	3	0.00345505	ABCD1,ABCB7,PAGE4	KIRC
BP	regulation of nucleic acid-templated transcription	3262	70	0.0243361	ZBTB33,HDAC6,PQBP1,CDX4,ZNF275,MAGED2,MSL3,PIM2,MID2,HDX,FOXR2,SPIN4,ZXDB,SPIN3,ARX,TSC22D3,EDA,ELF4,ELK1,ZNF449,PHF8,FLNA,HTATSF1,HCFC1,HMGB3,ZNF81,IGSF1,AR,MAGEB2,MECP2,FOXO4,CITED1,SPIN2B,NONO,CDK16,MBTPS2,ARMCX3,POU3F4,ATRX,BCOR,ZC4H2,MOSPD1,RBBP7,RPL10,RPS6KA3,BCORL1,ZNF674,SUV39H1,TBL1X,TFE3,TMSB4X,ZIC3,ZNF711,ZNF182,ZNF41,ZNF75D,HMGN5,NKAP,USP9X,RBM10,KDM5C,UXT,PHF6,OGT,IKBKG,CASK,APLN,CCN…	KIRC
BP	protein localization to postsynaptic membrane	35	3	0.0215115	GPC4,IQSEC2,GRIPAP1	KIRC
BP	regulation of growth hormone activity	2	1	0.0327815	LDOC1	KIRC
BP	regulation of calcium-dependent ATPase activity	2	1	0.0291343	RGN	KIRC
BP	negative regulation of calcium-dependent ATPase activity	1	1	0.0176844	RGN	KIRC
BP	regulation of dUTP diphosphatase activity	1	1	0.0176844	RGN	KIRC
BP	positive regulation of dUTP diphosphatase activity	1	1	0.0176844	RGN	KIRC
BP	regulation of aminoacyl-tRNA ligase activity	2	1	0.0296657	RGN	KIRC
BP	negative regulation of aminoacyl-tRNA ligase activity	1	1	0.0176844	RGN	KIRC
BP	regulation of leucine-tRNA ligase activity	1	1	0.0176844	RGN	KIRC
BP	negative regulation of leucine-tRNA ligase activity	1	1	0.0176844	RGN	KIRC
BP	organic acid transmembrane transport	154	6	0.0480146	PRAF2,ABCD1,CLTRN,SLC16A2,SLC7A3,SLC25A14	KIRC
BP	regulation of TORC2 signaling	6	2	0.00366356	OTUD5,USP9X	KIRC
BP	regulation of G protein-coupled receptor internalization	3	2	0.00131942	UBQLN2,APLN	KIRC
BP	negative regulation of G protein-coupled receptor internalization	2	1	0.0409053	UBQLN2	KIRC
BP	positive regulation of G protein-coupled receptor internalization	1	1	0.0221237	APLN	KIRC
BP	positive regulation of cation transmembrane transport	169	7	0.0233497	DMD,FLNA,G6PD,NLGN3,CLTRN,TMSB4X,RGN	KIRC
BP	regulation of ERAD pathway	20	2	0.047437	BCAP31,UBQLN2	KIRC
BP	positive regulation of ERAD pathway	14	2	0.0219986	BCAP31,UBQLN2	KIRC
BP	positive regulation of TORC2 signaling	5	2	0.00223606	OTUD5,USP9X	KIRC
BP	regulation of protein localization to chromosome, telomeric region	14	2	0.0297264	DKC1,GNL3L	KIRC
BP	positive regulation of protein localization to chromosome, telomeric region	12	2	0.0230355	DKC1,GNL3L	KIRC
BP	positive regulation of calcium ion transmembrane transport via high voltage-gated calcium channel	3	1	0.0448879	G6PD	KIRC
BP	regulation of maintenance of mitotic sister chromatid cohesion, telomeric	2	1	0.0358503	ATRX	KIRC
BP	negative regulation of maintenance of mitotic sister chromatid cohesion, telomeric	2	1	0.0358503	ATRX	KIRC
BP	regulation of autophagy of mitochondrion in response to mitochondrial depolarization	15	2	0.0286605	HDAC6,HUWE1	KIRC
BP	positive regulation of autophagy of mitochondrion in response to mitochondrial depolarization	14	2	0.0251223	HDAC6,HUWE1	KIRC
BP	regulation of membrane repolarization during atrial cardiac muscle cell action potential	2	1	0.0223037	FLNA	KIRC
BP	carboxylic acid transmembrane transport	153	6	0.047203	PRAF2,ABCD1,CLTRN,SLC16A2,SLC7A3,SLC25A14	KIRC
BP	cell surface receptor signaling pathway involved in cell-cell signaling	572	16	0.0261085	ZBTB33,ATP6AP2,AMER1,EDA,EMD,GPC4,GABRA3,GABRE,GABRG3,GPC3,XIAP,MECP2,CITED1,NLGN3,OTUD5,TBL1X	KIRC
BP	regulation of proton-transporting ATP synthase activity, rotational mechanism	3	1	0.0488042	TMSB4X	KIRC
BP	positive regulation of proton-transporting ATP synthase activity, rotational mechanism	3	1	0.0488042	TMSB4X	KIRC
BP	regulation of presynapse assembly	34	3	0.0152892	SLITRK4,GPC4,IL1RAPL2	KIRC
BP	regulation of L-proline import across plasma membrane	2	1	0.0320959	CLTRN	KIRC
BP	positive regulation of L-proline import across plasma membrane	2	1	0.0320959	CLTRN	KIRC
BP	nucleolar chromatin organization	10	2	0.0132381	PHF8,SUV39H1	KIRC
BP	response to water-immersion restraint stress	2	1	0.0339637	FOXO4	KIRC
BP	negative regulation of double-strand break repair via homologous recombination	18	2	0.0414486	FANCB,SHLD2,RADX	KIRC
BP	regulation of synaptic vesicle exocytosis	59	4	0.0188621	FMR1,SYN1,SYP,CASK	KIRC
BP	negative regulation of reactive oxygen species metabolic process	49	5	0.00104217	HDAC6,ABCD1,ABCB7,G6PD,PAGE4	KIRC
BP	regulation of early endosome to late endosome transport	18	2	0.0401674	SNX12,MSN	KIRC
BP	negative regulation of early endosome to late endosome transport	2	1	0.0437535	SNX12	KIRC
BP	regulation of endocytic recycling	19	2	0.0384229	EHD2,GRIPAP1	KIRC
BP	regulation of RNA biosynthetic process	3271	71	0.0185441	ZBTB33,HDAC6,PQBP1,CDX4,ZNF275,MAGED2,MSL3,PIM2,MID2,HDX,FOXR2,SPIN4,ZXDB,SPIN3,ARX,TSC22D3,EDA,ELF4,ELK1,ZNF449,PHF8,FLNA,HTATSF1,HCFC1,HMGB3,ZNF81,IGSF1,AR,MAGEB2,MECP2,FOXO4,CITED1,SPIN2B,NONO,CDK16,MBTPS2,ARMCX3,POU3F4,ATRX,BCOR,ZC4H2,MOSPD1,RBBP7,RPL10,RPS6KA3,BCORL1,ZNF674,SUV39H1,TBL1X,TFE3,TMSB4X,ZIC3,ZNF711,ZNF182,ZNF41,ZNF75D,HMGN5,NKAP,USP9X,RBM10,KDM5C,UXT,PHF6,OGT,IKBKG,CASK,APLN,RGN…	KIRC
BP	positive regulation of ATP biosynthetic process	12	2	0.0188991	TAFAZZIN,TMSB4X	KIRC
BP	negative regulation of chloride transport	3	1	0.0484785	GABRE	KIRC
BP	G1/S transition of mitotic cell cycle	247	2	0.0351555	FHL1,CDK16	KIRP
BP	regulation of transcription involved in G1/S transition of mitotic cell cycle	21	1	0.0317341	CDK16	KIRP
BP	spliceosomal snRNP assembly	40	1	0.0364289	GEMIN8	KIRP
BP	pentose-phosphate shunt	18	1	0.0228857	H6PD	KIRP
BP	protein dephosphorylation	254	2	0.0395882	DUSP21,PPP1R2C	KIRP
BP	glucocorticoid biosynthetic process	15	1	0.0227908	H6PD	KIRP
BP	steroid catabolic process	25	1	0.0206951	STS	KIRP
BP	NADP metabolic process	42	1	0.0487701	H6PD	KIRP
BP	NADPH regeneration	21	1	0.0276599	H6PD	KIRP
BP	activation-induced cell death of T cells	9	1	0.0097134	TSC22D3	KIRP
BP	activation of phospholipase C activity	30	1	0.0308609	ARHGAP6	KIRP
BP	steroid metabolic process	308	2	0.0454758	STS,H6PD	KIRP
BP	glucocorticoid metabolic process	24	1	0.0299141	H6PD	KIRP
BP	pentose-phosphate shunt, oxidative branch	4	1	0.00562746	H6PD	KIRP
BP	regulation of ketone biosynthetic process	17	1	0.0210593	H6PD	KIRP
BP	positive regulation of phospholipase C activity	40	1	0.0458501	ARHGAP6	KIRP
BP	growth hormone secretion	14	1	0.0179657	CDK16	KIRP
BP	regulation of glucocorticoid metabolic process	11	1	0.0174873	H6PD	KIRP
BP	regulation of glucocorticoid biosynthetic process	9	1	0.0161613	H6PD	KIRP
BP	primary alcohol biosynthetic process	14	1	0.021054	H6PD	KIRP
BP	cortisol metabolic process	12	1	0.0178697	H6PD	KIRP
BP	cortisol biosynthetic process	10	1	0.0158505	H6PD	KIRP
BP	peptidyl-tyrosine dephosphorylation	34	1	0.0472064	DUSP21	KIRP
BP	ketone biosynthetic process	44	1	0.048621	H6PD	KIRP
BP	T cell homeostasis	42	1	0.0427172	TSC22D3	KIRP
BP	cell cycle G1/S phase transition	275	2	0.0426961	FHL1,CDK16	KIRP
BP	fat cell differentiation	241	2	0.0406251	PSMB8,TFE3	KIRP
BP	regulation of hormone biosynthetic process	25	1	0.0377387	H6PD	KIRP
BP	homeostasis of number of cells	292	2	0.047197	TSC22D3,ARMCX1	KIRP
BP	glucose 6-phosphate metabolic process	27	1	0.0348905	H6PD	KIRP
BP	negative regulation of stress fiber assembly	32	1	0.0458336	ARHGAP6	KIRP
BP	regulation of synapse structural plasticity	7	1	0.0130997	FRMPD4	KIRP
BP	positive regulation of synapse structural plasticity	3	1	0.00464406	FRMPD4	KIRP
BP	negative regulation of focal adhesion assembly	17	1	0.0314504	ARHGAP6	KIRP
BP	face morphogenesis	29	1	0.0450366	ANKRD11	KIRP
BP	hematopoietic stem cell homeostasis	23	1	0.0267066	ARMCX1	KIRP
BP	negative regulation of lymphocyte apoptotic process	37	1	0.0480863	TSC22D3	KIRP
BP	regulation of T cell apoptotic process	40	1	0.0487068	TSC22D3	KIRP
BP	negative regulation of T cell apoptotic process	24	1	0.0303369	TSC22D3	KIRP
BP	regulation of activation-induced cell death of T cells	4	1	0.00443589	TSC22D3	KIRP
BP	negative regulation of activation-induced cell death of T cells	3	1	0.00388062	TSC22D3	KIRP
BP	regulation of steroid hormone biosynthetic process	16	1	0.027095	H6PD	KIRP
BP	regulation of brown fat cell differentiation	23	1	0.0366253	TFE3	KIRP
BP	positive regulation of brown fat cell differentiation	16	1	0.0243784	TFE3	KIRP
BP	olefinic compound biosynthetic process	24	1	0.0301667	H6PD	KIRP
BP	negative regulation of cell-substrate junction organization	17	1	0.0314504	ARHGAP6	KIRP
BP	regulation of phospholipase C activity	42	1	0.0497395	ARHGAP6	KIRP
BP	negative regulation of cell junction assembly	32	1	0.0497675	ARHGAP6	KIRP
BP	tertiary alcohol metabolic process	22	1	0.02366	H6PD	KIRP
BP	tertiary alcohol biosynthetic process	10	1	0.0158505	H6PD	KIRP
BP	regulation of cortisol biosynthetic process	7	1	0.0118553	H6PD	KIRP
BP	negative regulation of transcription by RNA polymerase II	926	2	0.0351902	HCFC1,ZNF219	THCA
BP	retinoid metabolic process	85	1	0.0223881	AWAT2	THCA
BP	chondrocyte differentiation	112	1	0.0490807	ZNF219	THCA
BP	neutral lipid metabolic process	130	1	0.0378828	AWAT2	THCA
BP	acylglycerol metabolic process	129	1	0.0372966	AWAT2	THCA
BP	monoacylglycerol biosynthetic process	7	1	0.000473435	AWAT2	THCA
BP	isoprenoid metabolic process	119	1	0.0297935	AWAT2	THCA
BP	terpenoid metabolic process	99	1	0.0251482	AWAT2	THCA
BP	wax biosynthetic process	4	1	0.000754385	AWAT2	THCA
BP	wax metabolic process	4	1	0.000754385	AWAT2	THCA
BP	diterpenoid metabolic process	88	1	0.0226397	AWAT2	THCA
BP	histone methylation	166	1	0.0489243	HCFC1	THCA
BP	histone acetylation	176	1	0.0488867	HCFC1	THCA
BP	peptidyl-lysine methylation	142	1	0.0407638	HCFC1	THCA
BP	viral latency	3	1	0.00147418	HCFC1	THCA
BP	latent virus replication	1	1	0.000685849	HCFC1	THCA
BP	release from viral latency	1	1	0.000685849	HCFC1	THCA
BP	positive regulation of histone modification	102	1	0.0298687	HCFC1	THCA
BP	regulation of histone methylation	81	1	0.0253283	HCFC1	THCA
BP	positive regulation of histone methylation	51	1	0.0142502	HCFC1	THCA
BP	positive regulation of cellular metabolic process	3031	3	0.0473057	HCFC1,MAP3K11,ZNF219	THCA
BP	positive regulation of protein modification process	971	2	0.0312498	HCFC1,MAP3K11	THCA
BP	regulation of chondrocyte differentiation	53	1	0.0234218	ZNF219	THCA
BP	positive regulation of chondrocyte differentiation	20	1	0.0107791	ZNF219	THCA
BP	positive regulation of stress-activated MAPK cascade	129	1	0.0450267	MAP3K11	THCA
BP	primary alcohol metabolic process	104	1	0.0246012	AWAT2	THCA
BP	cellular hormone metabolic process	133	1	0.0367265	AWAT2	THCA
BP	histone lysine methylation	129	1	0.0386782	HCFC1	THCA
BP	acylglycerol acyl-chain remodeling	4	1	0.00079896	AWAT2	THCA
BP	retinol metabolic process	53	1	0.0126239	AWAT2	THCA
BP	positive regulation of MAP kinase activity	115	1	0.0425498	MAP3K11	THCA
BP	regulation of JUN kinase activity	60	1	0.0221565	MAP3K11	THCA
BP	positive regulation of JUN kinase activity	43	1	0.0155511	MAP3K11	THCA
BP	positive regulation of neuron apoptotic process	54	1	0.0191042	MAP3K11	THCA
BP	histone H4 acetylation	74	1	0.0210551	HCFC1	THCA
BP	histone H4-K5 acetylation	16	1	0.00476378	HCFC1	THCA
BP	histone H4-K8 acetylation	16	1	0.00476378	HCFC1	THCA
BP	histone H4-K16 acetylation	21	1	0.00647639	HCFC1	THCA
BP	regulation of JNK cascade	139	1	0.0474182	MAP3K11	THCA
BP	positive regulation of JNK cascade	95	1	0.0331023	MAP3K11	THCA
BP	neutral lipid biosynthetic process	46	1	0.0113933	AWAT2	THCA
BP	monoacylglycerol metabolic process	14	1	0.00245603	AWAT2	THCA
BP	acylglycerol biosynthetic process	46	1	0.0113933	AWAT2	THCA
BP	positive regulation of nitrogen compound metabolic process	3069	3	0.047473	HCFC1,MAP3K11,ZNF219	THCA
BP	histone H3-K4 methylation	74	1	0.0207698	HCFC1	THCA
BP	regulation of histone H3-K4 methylation	39	1	0.0123313	HCFC1	THCA
BP	positive regulation of histone H3-K4 methylation	27	1	0.00826227	HCFC1	THCA
BP	limb bud formation	11	1	0.00617504	ZNF219	THCA
BP	regulation of cartilage development	71	1	0.0292334	ZNF219	THCA
BP	positive regulation of cartilage development	31	1	0.0146382	ZNF219	THCA
BP	positive regulation of stress-activated protein kinase signaling cascade	131	1	0.0458245	MAP3K11	THCA
BP	olefinic compound metabolic process	153	1	0.0400684	AWAT2	THCA
BP	positive regulation of neuron death	90	1	0.033735	MAP3K11	THCA
BP	fatty acid derivative metabolic process	70	1	0.0186395	AWAT2	THCA
BP	fatty acid derivative biosynthetic process	44	1	0.0136897	AWAT2	THCA
BP	mitotic cytokinesis	84	2	0.0363253	EXOC2,LZTS2	BLCA
BP	retrograde transport, vesicle recycling within Golgi	9	1	0.0298775	COG5	BLCA
BP	cytokinesis	181	3	0.0272449	CETN2,SEPTIN9,EXOC2,LZTS2	BLCA
BP	action potential	145	3	0.0176839	FLNA,TRPM4,CNTNAP1	BLCA
BP	formation of translation preinitiation complex	10	1	0.0323953	MCTS1	BLCA
BP	neural plate development	9	1	0.0335643	PTCH1	BLCA
BP	B-1 B cell homeostasis	3	1	0.0124908	ABL1	BLCA
BP	sprouting angiogenesis	177	3	0.0220116	ABL1,PDPK1,MIR503	BLCA
BP	cell migration involved in sprouting angiogenesis	88	2	0.0347569	ABL1,MIR503	BLCA
BP	protein localization to paranode region of axon	4	1	0.0141174	CNTNAP1	BLCA
BP	cytoplasmic translational initiation	38	2	0.00756478	MCTS1,SH3BGRL	BLCA
BP	B cell proliferation involved in immune response	6	1	0.0211965	ABL1	BLCA
BP	immature B cell differentiation	12	1	0.0431456	ABL1	BLCA
BP	transitional stage B cell differentiation	2	1	0.0089243	ABL1	BLCA
BP	transitional one stage B cell differentiation	1	1	0.0047993	ABL1	BLCA
BP	immune complex clearance	5	1	0.0153118	CLU	BLCA
BP	noradrenergic neuron differentiation	11	1	0.0400563	ZC4H2	BLCA
BP	noradrenergic neuron development	5	1	0.0191374	ZC4H2	BLCA
BP	galactose metabolic process	9	1	0.0320113	SLC35A2	BLCA
BP	translational initiation	114	3	0.00741992	MCTS1,SH3BGRL,NCK2	BLCA
BP	regulation of translational initiation	77	2	0.0305345	SH3BGRL,NCK2	BLCA
BP	autophagy	545	6	0.0134587	MID2,CLU,ABL1,MTMR8,FUNDC2,NPRL3	BLCA
BP	DNA damage induced protein phosphorylation	8	1	0.0304035	ABL1	BLCA
BP	transmembrane receptor protein tyrosine kinase signaling pathway	625	6	0.0289281	ABL1,FOXO4,PDPK1,MIR503,MYORG,NCK2	BLCA
BP	signal complex assembly	8	1	0.0331188	NCK2	BLCA
BP	epidermal growth factor receptor signaling pathway	108	3	0.00760393	ABL1,PDPK1,NCK2	BLCA
BP	adenylate cyclase-inhibiting dopamine receptor signaling pathway	6	1	0.0230082	FLNA	BLCA
BP	I-kappaB kinase/NF-kappaB signaling	284	4	0.0175947	MID2,FLNA,ABL1,PDPK1	BLCA
BP	muscle organ development	343	4	0.0406675	ITGB1BP2,FOXO4,MYORG,TCF12,CNTNAP1	BLCA
BP	neuromuscular junction development	48	2	0.0145465	ZC4H2,CNTNAP1	BLCA
BP	blood coagulation, intrinsic pathway	9	1	0.0286685	FLNA	BLCA
BP	cell population proliferation	1982	12	0.0497479	CLU,ABL1,MCTS1,FOXO4,PDPK1,DGCR8,TRPM4,PTCH1,MIR503,WDR13,HMGN5,NKAP,NCK2	BLCA
BP	cobalamin metabolic process	13	1	0.0452577	CLYBL	BLCA
BP	regulation of biosynthetic process	4016	21	0.0395522	MSL3,MID2,ZNF837,CLU,CUX1,FLNA,ABL1,GLA,ZNF81,FOXO4,MIR148B,ZC4H2,MOSPD1,PTCH1,MIR503,SH3BGRL,UPF3B,TCF12,TFE3,HMGN5,NKAP,NCK2	BLCA
BP	positive regulation of biosynthetic process	2015	13	0.0303754	MSL3,MID2,CLU,ABL1,FOXO4,MOSPD1,PTCH1,SH3BGRL,UPF3B,TCF12,TFE3,HMGN5,NCK2	BLCA
BP	regulation of catabolic process	979	8	0.0244991	PSMD14,MID2,CLU,ASB9,FLNA,ABL1,MTMR8,NPRL3	BLCA
BP	epidermal cell fate specification	4	1	0.0179249	PTCH1	BLCA
BP	response to chlorate	3	1	0.0126775	PTCH1	BLCA
BP	regulation of autophagy	339	4	0.0338249	MID2,ABL1,MTMR8,NPRL3	BLCA
BP	regulation of phospholipase activity	64	2	0.0220535	ABL1,PDPK1	BLCA
BP	negative regulation of phospholipase activity	6	1	0.0201686	ABL1	BLCA
BP	regulation of platelet activation	52	2	0.0155624	FLNA,FUNDC2	BLCA
BP	regulation of macromolecule biosynthetic process	3788	20	0.0417843	MSL3,MID2,ZNF837,CLU,CUX1,FLNA,ABL1,ZNF81,FOXO4,MIR148B,ZC4H2,MOSPD1,PTCH1,MIR503,SH3BGRL,UPF3B,TCF12,TFE3,HMGN5,NKAP,NCK2	BLCA
BP	positive regulation of macromolecule biosynthetic process	1864	12	0.0391581	MSL3,MID2,ABL1,FOXO4,MOSPD1,PTCH1,SH3BGRL,UPF3B,TCF12,TFE3,HMGN5,NCK2	BLCA
BP	positive regulation of platelet activation	10	1	0.032235	FLNA	BLCA
BP	regulation of endothelial cell migration	221	3	0.0428502	ABL1,PDPK1,MIR503	BLCA
BP	regulation of cell morphogenesis involved in differentiation	97	3	0.00620211	CUX1,FLNA,ABL1	BLCA
BP	positive regulation of cell morphogenesis involved in differentiation	81	3	0.00372851	CUX1,FLNA,ABL1	BLCA
BP	regulation of cell-substrate adhesion	219	3	0.0497481	FLNA,ABL1,MIR503	BLCA
BP	regulation of translational initiation by eIF2 alpha phosphorylation	10	1	0.0357886	NCK2	BLCA
BP	oligodendrocyte development	43	2	0.0116049	CLU,CNTNAP1	BLCA
BP	myotube cell development	42	2	0.0109723	MYORG,CNTNAP1	BLCA
BP	smooth muscle cell migration	94	2	0.0457737	FOXO4,MIR503	BLCA
BP	regulation of smooth muscle cell migration	86	2	0.038632	FOXO4,MIR503	BLCA
BP	organophosphate ester transport	146	3	0.0153148	ATP11C,SLC25A53,PITPNA	BLCA
BP	nucleotide-sugar transmembrane transport	12	1	0.0395589	SLC35A2	BLCA
BP	aminophospholipid transport	9	1	0.0319164	ATP11C	BLCA
BP	nucleobase-containing compound transport	214	3	0.0382892	CETN2,SLC25A53,UPF3B,SLC35A2	BLCA
BP	negative regulation of transcription by RNA polymerase I	8	1	0.0294722	FLNA	BLCA
BP	protein import	8	1	0.027125	CLU	BLCA
BP	viral gene expression	98	2	0.0486378	MID2,MCTS1	BLCA
BP	neuronal action potential propagation	9	1	0.033715	CNTNAP1	BLCA
BP	regulation of vasoconstriction	64	2	0.0229848	ABL1,TRPM4	BLCA
BP	cell differentiation in spinal cord	50	2	0.0171683	ZC4H2,PTCH1	BLCA
BP	ventral spinal cord development	46	2	0.0144218	ZC4H2,PTCH1	BLCA
BP	spinal cord motor neuron differentiation	30	2	0.00607967	ZC4H2,PTCH1	BLCA
BP	neural plate axis specification	2	1	0.00823323	PTCH1	BLCA
BP	central nervous system myelination	24	2	0.00375308	CLU,CNTNAP1	BLCA
BP	neuronal signal transduction	7	1	0.0266331	CLU	BLCA
BP	microspike assembly	4	1	0.0184359	ABL1	BLCA
BP	regulation of vitamin metabolic process	12	1	0.043195	CLYBL	BLCA
BP	paranodal junction assembly	6	1	0.0217144	CNTNAP1	BLCA
BP	regulation of cellular biosynthetic process	3952	21	0.0338277	MSL3,MID2,ZNF837,CLU,CUX1,FLNA,ABL1,GLA,ZNF81,FOXO4,MIR148B,ZC4H2,MOSPD1,PTCH1,MIR503,SH3BGRL,UPF3B,TCF12,TFE3,HMGN5,NKAP,NCK2	BLCA
BP	positive regulation of cellular biosynthetic process	1973	13	0.02637	MSL3,MID2,CLU,ABL1,FOXO4,MOSPD1,PTCH1,SH3BGRL,UPF3B,TCF12,TFE3,HMGN5,NCK2	BLCA
BP	positive regulation of cell projection organization	347	4	0.0436506	SEPTIN9,CUX1,FLNA,ABL1	BLCA
BP	positive regulation of translation in response to stress	7	1	0.0278015	NCK2	BLCA
BP	central nervous system myelin maintenance	5	1	0.0196508	CLU	BLCA
BP	axon ensheathment in central nervous system	24	2	0.00375308	CLU,CNTNAP1	BLCA
BP	regulation of Cdc42 protein signal transduction	8	1	0.0292615	ABL1	BLCA
BP	ribosome disassembly	10	1	0.0334693	MCTS1	BLCA
BP	T cell differentiation in thymus	86	2	0.040904	ABL1,NKAP	BLCA
BP	regulation of cellular amide metabolic process	527	5	0.0352812	CLU,MIR148B,MIR503,SH3BGRL,UPF3B,NCK2	BLCA
BP	positive regulation of cellular amide metabolic process	161	4	0.00267783	CLU,SH3BGRL,UPF3B,NCK2	BLCA
BP	positive regulation of ion transmembrane transport	184	3	0.0292767	FLNA,ABL1,PDPK1	BLCA
BP	NAD transmembrane transport	4	1	0.012531	SLC25A53	BLCA
BP	cellular triglyceride homeostasis	7	1	0.0226742	FUNDC2	BLCA
BP	protein localization to microtubule	19	2	0.00216363	MID2,ABL1	BLCA
BP	entry of bacterium into host cell	8	1	0.0310649	EXOC2	BLCA
BP	multicellular organismal signaling	168	3	0.02542	FLNA,TRPM4,CNTNAP1	BLCA
BP	regulation of translation in response to endoplasmic reticulum stress	11	1	0.0408644	NCK2	BLCA
BP	regulation of translation initiation in response to endoplasmic reticulum stress	8	1	0.0294046	NCK2	BLCA
BP	eiF2alpha phosphorylation in response to endoplasmic reticulum stress	7	1	0.0259732	NCK2	BLCA
BP	positive regulation of translation in response to endoplasmic reticulum stress	5	1	0.02095	NCK2	BLCA
BP	ERBB signaling pathway	123	3	0.0107682	ABL1,PDPK1,NCK2	BLCA
BP	neuropilin signaling pathway	4	1	0.0160824	ABL1	BLCA
BP	negative regulation of multicellular organism growth	12	1	0.0452797	PTCH1	BLCA
BP	regulation of cell population proliferation	1705	11	0.0403186	CLU,ABL1,MCTS1,FOXO4,PDPK1,DGCR8,TRPM4,PTCH1,MIR503,WDR13,HMGN5,NCK2	BLCA
BP	regulation of protein catabolic process	356	4	0.0410822	PSMD14,CLU,ASB9,FLNA	BLCA
BP	vasoconstriction	83	2	0.0366773	ABL1,TRPM4	BLCA
BP	regulation of I-kappaB kinase/NF-kappaB signaling	251	4	0.0116217	MID2,FLNA,ABL1,PDPK1	BLCA
BP	positive regulation of I-kappaB kinase/NF-kappaB signaling	187	3	0.0279531	MID2,FLNA,ABL1	BLCA
BP	NAD transport	5	1	0.016066	SLC25A53	BLCA
BP	blood vessel endothelial cell migration	168	3	0.0201189	ABL1,PDPK1,MIR503	BLCA
BP	regulation of blood vessel endothelial cell migration	141	3	0.0119245	ABL1,PDPK1,MIR503	BLCA
BP	positive regulation of blood vessel endothelial cell migration	71	2	0.0251104	ABL1,PDPK1	BLCA
BP	regulation of translational initiation in response to stress	14	1	0.048737	NCK2	BLCA
BP	positive regulation of insulin-like growth factor receptor signaling pathway	12	1	0.044484	MYORG	BLCA
BP	cellular amide metabolic process	1179	8	0.0480952	CLU,ACOT9,GLA,MCTS1,MIR148B,MIR503,SH3BGRL,UPF3B,NCK2	BLCA
BP	regulation of biological process involved in symbiotic interaction	57	2	0.0168212	MID2,EXOC2	BLCA
BP	protein localization to cytoskeleton	58	2	0.019838	MID2,ABL1	BLCA
BP	G0 to G1 transition	40	2	0.00913845	FOXO4,MIR503	BLCA
BP	positive regulation of cell differentiation	901	9	0.00569059	CUX1,FLNA,ABL1,TRPM4,ZC4H2,PTCH1,TCF12,TFE3,NKAP	BLCA
BP	positive regulation of fat cell differentiation	70	2	0.0273967	TRPM4,TFE3	BLCA
BP	positive regulation of neuron differentiation	90	2	0.0468728	ZC4H2,TCF12	BLCA
BP	negative regulation of osteoblast differentiation	54	2	0.0170894	TRPM4,PTCH1	BLCA
BP	positive regulation of translation	134	3	0.012267	SH3BGRL,UPF3B,NCK2	BLCA
BP	positive regulation of action potential	8	1	0.0307794	TRPM4	BLCA
BP	regulation of angiogenesis	338	4	0.0307109	ABL1,FOXO4,PDPK1,MIR503	BLCA
BP	positive regulation of cell adhesion	473	5	0.029618	FLNA,ABL1,TFE3,NKAP,NCK2	BLCA
BP	positive regulation of vasoconstriction	33	2	0.00665949	ABL1,TRPM4	BLCA
BP	positive regulation of vitamin metabolic process	4	1	0.01536	CLYBL	BLCA
BP	inter-Golgi cisterna vesicle-mediated transport	1	1	0.00344871	COG5	BLCA
BP	blood vessel morphogenesis	686	6	0.0371193	FLNA,ABL1,FOXO4,PDPK1,MIR503,NPRL3	BLCA
BP	positive regulation of axon regeneration	13	1	0.0445315	FLNA	BLCA
BP	skeletal muscle fiber development	38	2	0.00886377	MYORG,CNTNAP1	BLCA
BP	negative regulation of epithelial cell proliferation	171	3	0.022786	PTCH1,MIR503,WDR13	BLCA
BP	regulation of cell activation	634	6	0.0245386	FLNA,ABL1,PDPK1,FUNDC2,NKAP,NCK2	BLCA
BP	positive regulation of cell activation	380	4	0.0461332	FLNA,ABL1,NKAP,NCK2	BLCA
BP	neuromuscular process controlling balance	50	2	0.0162743	ABL1,CNTNAP1	BLCA
BP	microtubule severing	8	1	0.0287567	LZTS2	BLCA
BP	regulation of DNA-binding transcription factor activity	442	5	0.0213276	MID2,CLU,FLNA,ZC4H2,PTCH1	BLCA
BP	positive regulation of developmental process	1359	10	0.0267196	CUX1,FLNA,ABL1,PDPK1,TRPM4,ZC4H2,PTCH1,TCF12,TFE3,NKAP	BLCA
BP	positive regulation of nitrogen compound metabolic process	3060	17	0.0449689	PSMD14,MSL3,MID2,CLU,ASB9,CLYBL,ABL1,FOXO4,PDPK1,MOSPD1,PTCH1,SH3BGRL,UPF3B,TCF12,TFE3,HMGN5,NCK2	BLCA
BP	sequestering of calcium ion	130	3	0.0119378	FLNA,ABL1,PDPK1	BLCA
BP	release of sequestered calcium ion into cytosol	123	3	0.0103664	FLNA,ABL1,PDPK1	BLCA
BP	spindle midzone assembly	14	1	0.0472933	LZTS2	BLCA
BP	regulation of release of sequestered calcium ion into cytosol	81	2	0.0349649	ABL1,PDPK1	BLCA
BP	positive regulation of release of sequestered calcium ion into cytosol	40	2	0.00862296	ABL1,PDPK1	BLCA
BP	regulation of sequestering of calcium ion	126	3	0.0109811	FLNA,ABL1,PDPK1	BLCA
BP	negative regulation of sequestering of calcium ion	124	3	0.0105851	FLNA,ABL1,PDPK1	BLCA
BP	maintenance of location in cell	222	3	0.0461719	FLNA,ABL1,PDPK1	BLCA
BP	membrane depolarization	84	2	0.03973	ABL1,TRPM4	BLCA
BP	modulation by symbiont of entry into host	51	2	0.0140012	MID2,EXOC2	BLCA
BP	Bergmann glial cell differentiation	11	1	0.0409823	ABL1	BLCA
BP	regulation of lipase activity	88	2	0.0392884	ABL1,PDPK1	BLCA
BP	regulation of atrial cardiac muscle cell membrane repolarization	8	1	0.0303966	FLNA	BLCA
BP	muscle tissue development	417	5	0.0199573	ABL1,PTCH1,MYORG,NPRL3,CNTNAP1	BLCA
BP	smoothened signaling pathway involved in dorsal/ventral neural tube patterning	13	1	0.0469766	PTCH1	BLCA
BP	neural plate pattern specification	8	1	0.0312115	PTCH1	BLCA
BP	macrophage proliferation	12	1	0.0412064	CLU	BLCA
BP	microglial cell proliferation	8	1	0.0274687	CLU	BLCA
BP	cytoskeleton-dependent cytokinesis	111	3	0.0074687	SEPTIN9,EXOC2,LZTS2	BLCA
BP	protein targeting to lysosome involved in chaperone-mediated autophagy	3	1	0.010668	CLU	BLCA
BP	process utilizing autophagic mechanism	545	6	0.0134587	MID2,CLU,ABL1,MTMR8,FUNDC2,NPRL3	BLCA
BP	regulation of G0 to G1 transition	38	2	0.00837249	FOXO4,MIR503	BLCA
BP	negative regulation of G0 to G1 transition	7	2	0.000266634	FOXO4,MIR503	BLCA
BP	negative regulation of ERK1 and ERK2 cascade	76	2	0.0305235	ABL1,MIR503	BLCA
BP	positive regulation of neuron projection regeneration	14	1	0.0474464	FLNA	BLCA
BP	calcium ion transmembrane transport	340	4	0.0367337	FLNA,ABL1,PDPK1,TRPM4	BLCA
BP	protein localization to juxtaparanode region of axon	4	1	0.0163639	CNTNAP1	BLCA
BP	protein targeting to vacuole involved in autophagy	4	1	0.015526	CLU	BLCA
BP	commissural neuron axon guidance	11	1	0.0438605	PTCH1	BLCA
BP	cellular response to monoamine stimulus	98	2	0.0489394	FLNA,ABL1	BLCA
BP	cellular response to catecholamine stimulus	98	2	0.0489394	FLNA,ABL1	BLCA
BP	cell proliferation involved in metanephros development	10	1	0.0411662	PTCH1	BLCA
BP	metanephric collecting duct development	11	1	0.0451258	PTCH1	BLCA
BP	UDP-galactose transmembrane transport	4	1	0.0136501	SLC35A2	BLCA
BP	endothelial cell apoptotic process	65	2	0.0207357	ABL1,PDPK1	BLCA
BP	protein localization to microtubule cytoskeleton	54	2	0.017079	MID2,ABL1	BLCA
BP	IRES-dependent viral translational initiation	10	1	0.0376811	MCTS1	BLCA
BP	cardiac muscle cell action potential	78	2	0.0361627	FLNA,TRPM4	BLCA
BP	cardiac muscle cell action potential involved in contraction	53	2	0.0182356	FLNA,TRPM4	BLCA
BP	cardiac muscle cell contraction	75	2	0.034297	FLNA,TRPM4	BLCA
BP	atrial cardiac muscle cell action potential	19	2	0.00258941	FLNA,TRPM4	BLCA
BP	AV node cell action potential	11	1	0.0439706	TRPM4	BLCA
BP	Purkinje myocyte action potential	4	1	0.0153288	TRPM4	BLCA
BP	cell-cell signaling involved in cardiac conduction	37	2	0.00918085	FLNA,TRPM4	BLCA
BP	atrial cardiac muscle cell to AV node cell signaling	19	2	0.00258941	FLNA,TRPM4	BLCA
BP	AV node cell to bundle of His cell signaling	11	1	0.0439706	TRPM4	BLCA
BP	bundle of His cell to Purkinje myocyte signaling	7	1	0.0250945	TRPM4	BLCA
BP	Purkinje myocyte to ventricular cardiac muscle cell signaling	6	1	0.0230139	TRPM4	BLCA
BP	bundle of His cell action potential	7	1	0.0250945	TRPM4	BLCA
BP	membrane depolarization during AV node cell action potential	6	1	0.0257396	TRPM4	BLCA
BP	membrane depolarization during Purkinje myocyte cell action potential	3	1	0.0120621	TRPM4	BLCA
BP	membrane depolarization during bundle of His cell action potential	3	1	0.0126415	TRPM4	BLCA
BP	cell communication involved in cardiac conduction	61	2	0.022915	FLNA,TRPM4	BLCA
BP	atrial cardiac muscle cell to AV node cell communication	19	2	0.00258941	FLNA,TRPM4	BLCA
BP	AV node cell to bundle of His cell communication	12	1	0.0471748	TRPM4	BLCA
BP	Purkinje myocyte to ventricular cardiac muscle cell communication	6	1	0.0230139	TRPM4	BLCA
BP	regulation of cell migration involved in sprouting angiogenesis	72	2	0.0224187	ABL1,MIR503	BLCA
BP	endoplasmic reticulum membrane organization	14	1	0.0470641	STEEP1	BLCA
BP	positive regulation of inclusion body assembly	5	1	0.0178151	CLU	BLCA
BP	pyrimidine nucleotide-sugar transmembrane transport	11	1	0.0350755	SLC35A2	BLCA
BP	vesicle tethering involved in exocytosis	9	1	0.0360091	EXOC2	BLCA
BP	negative regulation of transcription from RNA polymerase II promoter in response to stress	10	1	0.0388223	NCK2	BLCA
BP	calcium ion transmembrane import into cytosol	181	3	0.0301816	FLNA,ABL1,PDPK1	BLCA
BP	neuromuscular junction development, skeletal muscle fiber	1	1	0.00442219	CNTNAP1	BLCA
BP	action potential propagation	9	1	0.033715	CNTNAP1	BLCA
BP	regulation of action potential	61	2	0.0219613	FLNA,TRPM4	BLCA
BP	regulation of membrane repolarization during action potential	10	1	0.0370178	FLNA	BLCA
BP	regulation of atrial cardiac muscle cell action potential	4	1	0.0170529	TRPM4	BLCA
BP	regulation of ventricular cardiac muscle cell action potential	12	1	0.0468049	TRPM4	BLCA
BP	membrane repolarization during atrial cardiac muscle cell action potential	7	1	0.0278232	FLNA	BLCA
BP	protein localization to axon	9	1	0.0332734	CNTNAP1	BLCA
BP	atrial cardiac muscle cell membrane repolarization	11	1	0.0419848	FLNA	BLCA
BP	vascular endothelial cell proliferation	51	2	0.0111076	PDPK1,MIR503	BLCA
BP	regulation of cobalamin metabolic process	1	1	0.00504488	CLYBL	BLCA
BP	positive regulation of cobalamin metabolic process	1	1	0.00504488	CLYBL	BLCA
BP	plasma membrane bounded cell projection assembly	552	5	0.049812	SEPTIN9,CLCN4,FLNA,ABL1,NCK2	BLCA
BP	aminophospholipid translocation	7	1	0.0253364	ATP11C	BLCA
BP	regulation of substrate adhesion-dependent cell spreading	59	2	0.0209731	FLNA,ABL1	BLCA
BP	positive regulation of substrate adhesion-dependent cell spreading	44	2	0.0117931	FLNA,ABL1	BLCA
BP	regulation of dosage compensation by inactivation of X chromosome	11	1	0.0371289	MSL3	BLCA
BP	negative regulation of long-term synaptic potentiation	12	1	0.0442427	ABL1	BLCA
BP	negative regulation of phospholipase C activity	2	1	0.00855339	ABL1	BLCA
BP	positive regulation of response to reactive oxygen species	9	1	0.0328269	ABL1	BLCA
BP	positive regulation of neuron death	91	2	0.0443093	CLU,ABL1	BLCA
BP	regulation of hydrogen peroxide-mediated programmed cell death	14	1	0.0475828	ABL1	BLCA
BP	positive regulation of hydrogen peroxide-mediated programmed cell death	6	1	0.0212393	ABL1	BLCA
BP	regulation of vasculature development	344	4	0.0323125	ABL1,FOXO4,PDPK1,MIR503	BLCA
BP	regulation of tetrapyrrole metabolic process	9	1	0.0309391	CLYBL	BLCA
BP	positive regulation of tetrapyrrole metabolic process	4	1	0.0151256	CLYBL	BLCA
BP	positive regulation of endoplasmic reticulum stress-induced intrinsic apoptotic signaling pathway	10	1	0.0350217	NCK2	BLCA
BP	regulation of neuronal signal transduction	1	1	0.00469598	CLU	BLCA
BP	regulation of non-motile cilium assembly	12	1	0.0444873	SEPTIN9	BLCA
BP	positive regulation of non-motile cilium assembly	8	1	0.0312646	SEPTIN9	BLCA
BP	positive regulation of response to oxidative stress	11	1	0.0394061	ABL1	BLCA
BP	regulation of supramolecular fiber organization	373	4	0.0499949	CLU,FLNA,ABL1,NCK2	BLCA
BP	positive regulation of supramolecular fiber organization	175	3	0.027913	CLU,ABL1,NCK2	BLCA
BP	regulation of tau-protein kinase activity	14	1	0.0473951	CLU	BLCA
BP	positive regulation of tau-protein kinase activity	8	1	0.0270268	CLU	BLCA
BP	neurofibrillary tangle assembly	3	1	0.0144681	CLU	BLCA
BP	regulation of neurofibrillary tangle assembly	2	1	0.00946396	CLU	BLCA
BP	positive regulation of neurofibrillary tangle assembly	1	1	0.00469598	CLU	BLCA
BP	podocyte apoptotic process	4	1	0.0143333	ABL1	BLCA
BP	response to dopamine	85	2	0.0366208	FLNA,ABL1	BLCA
BP	cellular response to dopamine	84	2	0.0359075	FLNA,ABL1	BLCA
BP	negative regulation of response to endoplasmic reticulum stress	43	2	0.0110266	CLU,NCK2	BLCA
BP	regulation of PERK-mediated unfolded protein response	11	1	0.0379707	NCK2	BLCA
BP	negative regulation of PERK-mediated unfolded protein response	6	1	0.0234766	NCK2	BLCA
BP	regulation of establishment of T cell polarity	6	1	0.0224318	ABL1	BLCA
BP	positive regulation of establishment of T cell polarity	4	1	0.0140954	ABL1	BLCA
BP	negative regulation of endoplasmic reticulum stress-induced eIF2 alpha phosphorylation	5	1	0.0190066	NCK2	BLCA
BP	positive regulation of atrial cardiac muscle cell action potential	1	1	0.00460837	TRPM4	BLCA
BP	negative regulation of epithelial cell apoptotic process	61	2	0.0198816	ABL1,PDPK1	BLCA
BP	positive regulation of cation transmembrane transport	169	3	0.023577	FLNA,ABL1,PDPK1	BLCA
BP	DN4 thymocyte differentiation	1	1	0.0047993	ABL1	BLCA
BP	regulation of adipose tissue development	12	1	0.0443315	TRPM4	BLCA
BP	positive regulation of adipose tissue development	8	1	0.0303776	TRPM4	BLCA
BP	positive regulation of membrane depolarization	10	1	0.0356622	TRPM4	BLCA
BP	positive regulation of regulation of vascular associated smooth muscle cell membrane depolarization	1	1	0.00460837	TRPM4	BLCA
BP	positive regulation of calcium ion transmembrane transport	92	2	0.044481	ABL1,PDPK1	BLCA
BP	protein localization to cytoplasmic microtubule plus-end	1	1	0.0047993	ABL1	BLCA
BP	regulation of microtubule binding	10	1	0.0372805	ABL1	BLCA
BP	positive regulation of microtubule binding	6	1	0.0226591	ABL1	BLCA
BP	regulation of actin filament binding	3	1	0.0127149	ABL1	BLCA
BP	positive regulation of actin filament binding	2	1	0.0079973	ABL1	BLCA
BP	regulation of actin binding	4	1	0.0161032	ABL1	BLCA
BP	positive regulation of actin binding	2	1	0.0079973	ABL1	BLCA
BP	regulation of cytoplasmic translational initiation	6	1	0.0212802	SH3BGRL	BLCA
BP	positive regulation of cytoplasmic translational initiation	5	1	0.0183183	SH3BGRL	BLCA
BP	negative regulation of type B pancreatic cell proliferation	3	1	0.0104964	WDR13	BLCA
BP	protein localization to microtubule plus-end	6	1	0.0234306	ABL1	BLCA
BP	regulation of membrane repolarization during atrial cardiac muscle cell action potential	2	1	0.00728055	FLNA	BLCA
BP	regulation of membrane repolarization during cardiac muscle cell action potential	7	1	0.0244896	FLNA	BLCA
BP	positive regulation of hydrogen peroxide-induced cell death	9	1	0.0328269	ABL1	BLCA
BP	regulation of modification of synaptic structure	9	1	0.0368952	ABL1	BLCA
BP	non-motile cilium assembly	64	2	0.021519	SEPTIN9,CLCN4	BLCA
BP	regulation of blood vessel branching	4	1	0.016221	ABL1	BLCA
BP	positive regulation of blood vessel branching	3	1	0.0115517	ABL1	BLCA
BP	regulation of vascular endothelial cell proliferation	51	2	0.0111076	PDPK1,MIR503	BLCA
BP	protein localization to microtubule end	6	1	0.0234306	ABL1	BLCA
BP	protein localization to cytoplasmic microtubule	2	1	0.00829726	ABL1	BLCA
BP	regulation of response to endoplasmic reticulum stress	80	2	0.0337589	CLU,NCK2	BLCA
BP	regulation of amyloid fibril formation	15	1	0.0499203	CLU	BLCA
BP	negative regulation of amyloid fibril formation	12	1	0.0402589	CLU	BLCA
BP	positive regulation of amyloid fibril formation	4	1	0.01528	CLU	BLCA
BP	activation of protein kinase C activity	5	1	0.018332	ABL1	BLCA
BP	paranodal junction maintenance	2	1	0.00764716	CNTNAP1	BLCA
BP	negative regulation of transcription from RNA polymerase II promoter in response to endoplasmic reticulum stress	4	1	0.0172448	NCK2	BLCA
BP	regulation of vascular associated smooth muscle cell membrane depolarization	1	1	0.00460837	TRPM4	BLCA
BP	response to water-immersion restraint stress	2	1	0.00854249	FOXO4	BLCA
BP	positive regulation of Wnt signaling pathway, planar cell polarity pathway	9	1	0.0327794	ABL1	BLCA
BP	regulation of endothelial cell apoptotic process	59	2	0.0169372	ABL1,PDPK1	BLCA
BP	negative regulation of endothelial cell apoptotic process	34	2	0.00590268	ABL1,PDPK1	BLCA
BP	regulation of entry of bacterium into host cell	6	1	0.0233285	EXOC2	BLCA
BP	negative regulation of transcription by RNA polymerase II	926	13	0.0108324	ZBTB33,CDX4,HCFC1,MECP2,TBX22,ATRX,BCOR,HDAC8,MOSPD1,RPL10,SOX3,TAF1,NKAP,RBM10	HNSC
BP	regulation of histone H3-K36 methylation	7	1	0.0455633	BCOR	HNSC
BP	negative regulation of histone H3-K36 methylation	1	1	0.00456888	BCOR	HNSC
BP	box H/ACA RNA 3'-end processing	2	1	0.0130236	DKC1	HNSC
BP	positive regulation of endothelial cell proliferation	114	3	0.0402924	PLXNB3,MIR503,APLN	HNSC
BP	blood vessel remodeling	46	2	0.035934	FLNA,ATP7A	HNSC
BP	regulation of respiratory gaseous exchange by nervous system process	12	2	0.00315804	MECP2,NLGN3	HNSC
BP	positive regulation of receptor internalization	26	2	0.0129004	FMR1,APLN	HNSC
BP	connective tissue replacement involved in inflammatory response wound healing	7	1	0.0419853	TIMP1	HNSC
BP	respiratory system process	39	2	0.0301332	MECP2,NLGN3	HNSC
BP	proteoglycan metabolic process	90	3	0.0230508	IDS,BGN,HS6ST2	HNSC
BP	isocitrate metabolic process	6	1	0.0486344	IDH3G	HNSC
BP	DNA replication, synthesis of RNA primer	6	1	0.0485733	POLA1	HNSC
BP	leading strand elongation	4	1	0.0252322	POLA1	HNSC
BP	lagging strand elongation	4	1	0.0319658	POLA1	HNSC
BP	chromatin organization	594	10	0.0104136	MSL3,HCFC1,MECP2,ATRX,ERCC6L,BCOR,HDAC8,TSPYL2,UBE2A,KDM5C,FAM50A	HNSC
BP	regulation of DNA-templated transcription	3257	31	0.0414071	ZBTB33,CDX4,MSL3,PIM2,HDX,ZXDB,TSC22D3,ZNF449,FLNA,HCFC1,ZNF81,MECP2,FOXO4,TBX22,POU3F4,ATRX,BCOR,ZNF280C,HDAC8,MOSPD1,RAP2C,RPL10,SOX3,TAF1,TFE3,TRAF3,ZIC3,ZNF182,ZNF75D,NKAP,RBM10,KDM5C,APLN,MED12	HNSC
BP	RNA localization	194	5	0.0146088	CETN2,DKC1,FMR1,LUZP4,NXT2,UPF3B	HNSC
BP	amino-acid betaine biosynthetic process	6	1	0.0457571	TMLHE	HNSC
BP	nucleotide transport	37	2	0.0317079	SLC25A5,SLC25A53	HNSC
BP	regulation of sister chromatid cohesion	21	2	0.0101235	ATRX,HDAC8	HNSC
BP	adenylate cyclase-inhibiting dopamine receptor signaling pathway	6	1	0.0398203	FLNA	HNSC
BP	synapse assembly	181	4	0.0299685	SLITRK4,MECP2,NLGN3,GPRASP3	HNSC
BP	lactation	40	2	0.0318587	ATP7A,APLN	HNSC
BP	ultradian rhythm	2	1	0.0133331	ENOX2	HNSC
BP	macromolecule biosynthetic process	4565	43	0.0222376	ZBTB33,CDX4,MSL3,PIM2,HDX,ZXDB,DKC1,TSC22D3,ZNF449,FLNA,FMR1,GALNT2,MCTS1,HCFC1,ZNF81,MECP2,FOXO4,TBX22,ZDHHC9,ATP7A,POLA1,POU3F4,ATRX,BCOR,ZNF280C,HDAC8,MOSPD1,MIR503,RAP2C,RPL10,RPL36A,PORCN,UPF3B,SOX3,TAF1,TFE3,TRAF3,ZIC3,ZNF182,ZNF75D,NKAP,RBM10,KDM5C,APLN,HS6ST2,MED12	HNSC
BP	axis specification	95	3	0.0253075	CDX4,BCOR,ZIC3	HNSC
BP	regulation of biosynthetic process	4023	38	0.0263206	ZBTB33,CDX4,MSL3,PIM2,HDX,ZXDB,DKC1,TSC22D3,ZNF449,ABCB7,FLNA,FMR1,GLA,HCFC1,ZNF81,MECP2,FOXO4,TBX22,ATP7A,POU3F4,ATRX,BCOR,ZNF280C,HDAC8,MOSPD1,MIR503,RAP2C,RPL10,UPF3B,SOX3,TAF1,TFE3,TRAF3,ZIC3,ZNF182,ZNF75D,NKAP,RBM10,KDM5C,APLN,MED12	HNSC
BP	negative regulation of biosynthetic process	1624	19	0.0144872	ZBTB33,CDX4,ABCB7,FLNA,FMR1,GLA,HCFC1,MECP2,TBX22,ATRX,BCOR,HDAC8,MOSPD1,MIR503,RPL10,SOX3,TAF1,NKAP,RBM10,KDM5C	HNSC
BP	regulation of catabolic process	980	12	0.0451691	RRAGB,PIM2,AMER1,ASB9,DKC1,FLNA,FMR1,SLC25A5,ARAF,TBC1D25,TAF1,TIMP1,RBM10	HNSC
BP	response to iron(III) ion	4	1	0.0301634	ATP7A	HNSC
BP	regulation of G2/M transition of mitotic cell cycle	98	3	0.0326557	FHL1,MECP2,FOXO4	HNSC
BP	regulation of macromolecule biosynthetic process	3795	35	0.0460861	ZBTB33,CDX4,MSL3,PIM2,HDX,ZXDB,DKC1,TSC22D3,ZNF449,FLNA,FMR1,HCFC1,ZNF81,MECP2,FOXO4,TBX22,POU3F4,ATRX,BCOR,ZNF280C,HDAC8,MOSPD1,MIR503,RAP2C,RPL10,UPF3B,SOX3,TAF1,TFE3,TRAF3,ZIC3,ZNF182,ZNF75D,NKAP,RBM10,KDM5C,APLN,MED12	HNSC
BP	negative regulation of macromolecule biosynthetic process	1530	17	0.0317673	ZBTB33,CDX4,FLNA,FMR1,HCFC1,MECP2,TBX22,ATRX,BCOR,HDAC8,MOSPD1,MIR503,RPL10,SOX3,TAF1,NKAP,RBM10,KDM5C	HNSC
BP	positive regulation of nuclear cell cycle DNA replication	6	1	0.0416592	ATRX	HNSC
BP	regulation of lamellipodium assembly	42	2	0.0318086	PLXNB3,ATP7A	HNSC
BP	negative regulation of lamellipodium assembly	6	1	0.0352919	PLXNB3	HNSC
BP	muscle cell migration	107	3	0.0298207	FOXO4,MIR424,ATP7A,MIR503	HNSC
BP	smooth muscle cell migration	94	3	0.0210766	FOXO4,MIR424,ATP7A,MIR503	HNSC
BP	regulation of smooth muscle cell migration	86	3	0.016413	FOXO4,MIR424,ATP7A,MIR503	HNSC
BP	positive regulation of smooth muscle cell migration	44	2	0.0330575	FOXO4,ATP7A	HNSC
BP	heparan sulfate proteoglycan biosynthetic process, enzymatic modification	6	1	0.035399	HS6ST2	HNSC
BP	copper ion import	6	1	0.0414979	ATP7A	HNSC
BP	ornithine transport	7	1	0.0491015	SLC7A3	HNSC
BP	adenine transport	5	1	0.0381735	SLC25A5	HNSC
BP	nucleobase-containing compound transport	214	7	0.00101954	CETN2,FMR1,SLC25A5,SLC25A53,LUZP4,NXT2,UPF3B,SLC35A2	HNSC
BP	RNA metabolic process	4640	42	0.0297668	ZBTB33,CDX4,UTP14A,MSL3,PIM2,HDX,ZXDB,DKC1,TSC22D3,ZNF449,FLNA,FMR1,HCFC1,HNRNPH2,ZNF81,MECP2,FOXO4,TBX22,RBMX2,PIN4,POLA1,POU3F4,ATRX,BCOR,RBM41,ZNF280C,HDAC8,MOSPD1,RAP2C,RPL10,UPF3B,SOX3,TAF1,TFE3,TRAF3,ZIC3,ZNF182,ZNF75D,NKAP,RBM10,KDM5C,APLN,TSR2,FAM50A,MED12	HNSC
BP	synaptic vesicle exocytosis	110	3	0.0392773	FMR1,SYN1,SYP	HNSC
BP	histone modification	466	8	0.0183255	MSL3,HCFC1,MECP2,ATRX,BCOR,HDAC8,TAF1,UBE2A,KDM5C	HNSC
BP	histone methylation	166	4	0.0310832	HCFC1,MECP2,ATRX,BCOR	HNSC
BP	protein-heme linkage	1	1	0.00901158	HCCS	HNSC
BP	protein-tetrapyrrole linkage	1	1	0.00901158	HCCS	HNSC
BP	peptidyl-lysine methylation	142	4	0.0189791	HCFC1,MECP2,ATRX,BCOR	HNSC
BP	cytochrome c-heme linkage	1	1	0.00901158	HCCS	HNSC
BP	protein palmitoylation	32	2	0.026008	ZDHHC9,PORCN	HNSC
BP	viral latency	3	1	0.0184156	HCFC1	HNSC
BP	latent virus replication	1	1	0.00499339	HCFC1	HNSC
BP	release from viral latency	1	1	0.00499339	HCFC1	HNSC
BP	regulation of nucleobase-containing compound metabolic process	3870	37	0.0263487	ZBTB33,CDX4,MSL3,PIM2,HDX,ZXDB,DKC1,TSC22D3,ZNF449,FLNA,FMR1,HCFC1,HNRNPH2,ZNF81,MECP2,FOXO4,TBX22,POU3F4,ATRX,BCOR,RADX,ZNF280C,HDAC8,MOSPD1,RAP2C,RPL10,TSPYL2,SOX3,TAF1,TFE3,TRAF3,ZIC3,ZNF182,ZNF75D,NKAP,RBM10,KDM5C,APLN,FAM50A,MED12	HNSC
BP	proprioception	5	1	0.0378636	MECP2	HNSC
BP	peptide cross-linking via chondroitin 4-sulfate glycosaminoglycan	6	1	0.0398754	BGN	HNSC
BP	regulation of transmembrane transporter activity	284	5	0.0437682	FHL1,FMR1,KCNE5,ATP7A,NLGN3	HNSC
BP	heparan sulfate proteoglycan catabolic process	7	1	0.0474149	IDS	HNSC
BP	heparan sulfate proteoglycan metabolic process	40	2	0.0283968	IDS,HS6ST2	HNSC
BP	negative regulation of cell migration	354	6	0.0257236	NEXMIF,MECP2,MIR424,PLXNB3,MIR503,RAP2C,TIMP1	HNSC
BP	germ-line stem cell population maintenance	4	1	0.0287088	ZIC3	HNSC
BP	regulation of histone modification	175	4	0.0346223	HCFC1,MECP2,ATRX,BCOR	HNSC
BP	regulation of histone methylation	81	4	0.00251654	HCFC1,MECP2,ATRX,BCOR	HNSC
BP	snRNA pseudouridine synthesis	3	1	0.0230816	DKC1	HNSC
BP	regulation of cellular metabolic process	5454	49	0.0270484	ZBTB33,RRAGB,CDX4,MSL3,PIM2,HDX,ZXDB,DKC1,DLG3,TSC22D3,ZNF449,ABCB7,FLNA,FMR1,GLA,SLC25A5,HCFC1,HNRNPH2,ZNF81,ARAF,MECP2,FOXO4,TBC1D25,TBX22,ATP7A,POU3F4,ATRX,BCOR,RADX,ZNF280C,HDAC8,MOSPD1,MIR503,RAP2C,RPL10,TSPYL2,UPF3B,SOX3,TAF1,TFE3,TIMP1,TRAF3,ZIC3,ZNF182,ZNF75D,NKAP,PPP1R2C,RBM10,KDM5C,APLN,FAM50A,MED12	HNSC
BP	negative regulation of cellular metabolic process	2242	23	0.0327464	ZBTB33,CDX4,DKC1,ABCB7,FLNA,FMR1,GLA,HCFC1,MECP2,TBX22,ATRX,BCOR,RADX,HDAC8,MOSPD1,MIR503,RPL10,TSPYL2,SOX3,TAF1,TIMP1,NKAP,RBM10,KDM5C	HNSC
BP	regulation of cellular biosynthetic process	3959	38	0.0207985	ZBTB33,CDX4,MSL3,PIM2,HDX,ZXDB,DKC1,TSC22D3,ZNF449,ABCB7,FLNA,FMR1,GLA,HCFC1,ZNF81,MECP2,FOXO4,TBX22,ATP7A,POU3F4,ATRX,BCOR,ZNF280C,HDAC8,MOSPD1,MIR503,RAP2C,RPL10,UPF3B,SOX3,TAF1,TFE3,TRAF3,ZIC3,ZNF182,ZNF75D,NKAP,RBM10,KDM5C,APLN,MED12	HNSC
BP	negative regulation of cellular biosynthetic process	1595	18	0.0235403	ZBTB33,CDX4,FLNA,FMR1,GLA,HCFC1,MECP2,TBX22,ATRX,BCOR,HDAC8,MOSPD1,MIR503,RPL10,SOX3,TAF1,NKAP,RBM10,KDM5C	HNSC
BP	positive regulation of cell projection organization	348	6	0.0290452	FLNA,FMR1,GDI1,PLXNB3,ATP7A,GPRASP3	HNSC
BP	regulation of telomere maintenance	99	3	0.0390782	DKC1,ATRX,HDAC8	HNSC
BP	regulation of ion transmembrane transporter activity	274	5	0.0383549	FHL1,FMR1,KCNE5,ATP7A,NLGN3	HNSC
BP	regulation of monooxygenase activity	54	2	0.0487176	GLA,ATP7A	HNSC
BP	regulation of tyrosinase activity	2	1	0.0147689	ATP7A	HNSC
BP	positive regulation of tyrosinase activity	2	1	0.0147689	ATP7A	HNSC
BP	RNA biosynthetic process	3386	32	0.0431003	ZBTB33,CDX4,MSL3,PIM2,HDX,ZXDB,TSC22D3,ZNF449,FLNA,HCFC1,ZNF81,MECP2,FOXO4,TBX22,POLA1,POU3F4,ATRX,BCOR,ZNF280C,HDAC8,MOSPD1,RAP2C,RPL10,SOX3,TAF1,TFE3,TRAF3,ZIC3,ZNF182,ZNF75D,NKAP,RBM10,KDM5C,APLN,MED12	HNSC
BP	nuclear DNA replication	38	2	0.0334463	POLA1,ATRX	HNSC
BP	histone H2A ubiquitination	32	2	0.0217165	BCOR,UBE2A	HNSC
BP	box H/ACA RNA metabolic process	3	1	0.0202286	DKC1	HNSC
BP	negative regulation of maintenance of sister chromatid cohesion	3	1	0.023444	ATRX	HNSC
BP	negative regulation of maintenance of mitotic sister chromatid cohesion	3	1	0.023444	ATRX	HNSC
BP	ion transmembrane transport	1137	13	0.0492993	PRAF2,ABCB7,FHL1,FLNA,FMR1,KCNE5,SLC25A5,KCND1,ATP7A,NLGN3,SLC35A2,CACNA1F,SLC7A3	HNSC
BP	iron ion transmembrane transport	21	2	0.0104057	ABCB7,ATP7A	HNSC
BP	negative regulation of iron ion transport	3	1	0.0268734	ATP7A	HNSC
BP	regulation of iron ion transmembrane transport	5	1	0.0401084	ATP7A	HNSC
BP	negative regulation of iron ion transmembrane transport	3	1	0.0268734	ATP7A	HNSC
BP	regulation of transmembrane transport	602	8	0.0493146	FHL1,FLNA,FMR1,KCNE5,KCND1,ATP7A,NLGN3,CACNA1F	HNSC
BP	regulation of ion transmembrane transport	509	8	0.0209923	FHL1,FLNA,FMR1,KCNE5,KCND1,ATP7A,NLGN3,CACNA1F	HNSC
BP	negative regulation of ion transmembrane transport	112	3	0.0362721	FMR1,KCNE5,ATP7A	HNSC
BP	box H/ACA RNA processing	2	1	0.0130236	DKC1	HNSC
BP	histone lysine methylation	129	4	0.0137366	HCFC1,MECP2,ATRX,BCOR	HNSC
BP	post-embryonic appendage morphogenesis	1	1	0.00851249	ATRX	HNSC
BP	post-embryonic limb morphogenesis	1	1	0.00851249	ATRX	HNSC
BP	post-embryonic forelimb morphogenesis	1	1	0.00851249	ATRX	HNSC
BP	social behavior	51	2	0.0432803	MECP2,NLGN3	HNSC
BP	central nervous system segmentation	4	1	0.0239243	ZIC3	HNSC
BP	NAD transmembrane transport	4	1	0.0278536	SLC25A53	HNSC
BP	copper ion transmembrane transport	6	1	0.0429811	ATP7A	HNSC
BP	determination of pancreatic left/right asymmetry	5	1	0.035725	ZIC3	HNSC
BP	determination of left/right asymmetry in nervous system	2	1	0.0132972	ZIC3	HNSC
BP	TRIF-dependent toll-like receptor signaling pathway	7	1	0.0474045	TRAF3	HNSC
BP	histone H3-K9 trimethylation	17	2	0.00764982	MECP2,ATRX	HNSC
BP	negative regulation of locomotion	405	6	0.0461517	NEXMIF,MECP2,MIR424,PLXNB3,MIR503,RAP2C,TIMP1	HNSC
BP	regulation of fibroblast growth factor receptor signaling pathway	36	2	0.0196202	MIR424,MIR503,APLN	HNSC
BP	negative regulation of fibroblast growth factor receptor signaling pathway	22	2	0.00731306	MIR424,MIR503,APLN	HNSC
BP	regulation of protein catabolic process	356	6	0.0427664	AMER1,ASB9,FLNA,FMR1,ARAF,TAF1,TIMP1	HNSC
BP	epinephrine metabolic process	3	1	0.0229898	ATP7A	HNSC
BP	negative regulation of apoptotic process	869	11	0.0387535	FMR1-AS1,PIM2,TSC22D3,FLNA,SLC25A5,XIAP,ARAF,MECP2,POU3F4,RPL10,TIMP1,GPRASP3	HNSC
BP	negative regulation of programmed cell death	893	11	0.045381	FMR1-AS1,PIM2,TSC22D3,FLNA,SLC25A5,XIAP,ARAF,MECP2,POU3F4,RPL10,TIMP1,GPRASP3	HNSC
BP	NAD transport	5	1	0.0365716	SLC25A53	HNSC
BP	regulation of potassium ion transport	112	3	0.0378774	FHL1,FLNA,KCNE5	HNSC
BP	positive regulation of potassium ion transport	51	3	0.00514242	FHL1,FLNA,KCNE5	HNSC
BP	regulation of RNA splicing	175	4	0.0374292	FMR1,HNRNPH2,RBM10,FAM50A	HNSC
BP	protein acylation	262	5	0.0414668	MSL3,HCFC1,MECP2,ZDHHC9,PORCN,TAF1	HNSC
BP	regulation of respiratory gaseous exchange	24	2	0.0116923	MECP2,NLGN3	HNSC
BP	histone H4-K16 acetylation	21	2	0.00980369	MSL3,HCFC1	HNSC
BP	regulation of respiratory system process	15	2	0.00467351	MECP2,NLGN3	HNSC
BP	cell cycle DNA replication	42	2	0.0396256	POLA1,ATRX	HNSC
BP	modulation by host of viral process	45	2	0.0441753	FMR1,ZDHHC9	HNSC
BP	modulation by host of viral RNA genome replication	5	1	0.0404429	FMR1	HNSC
BP	G0 to G1 transition	40	2	0.0353622	FOXO4,MIR424,MIR503	HNSC
BP	protein palmitoleylation	1	1	0.00708956	PORCN	HNSC
BP	carnitine biosynthetic process	4	1	0.0304497	TMLHE	HNSC
BP	negative regulation of G protein-coupled receptor signaling pathway	51	2	0.0493726	APLN,GPRASP1	HNSC
BP	negative regulation of sister chromatid cohesion	5	1	0.0394002	ATRX	HNSC
BP	negative regulation of DNA-templated transcription	1241	15	0.023204	ZBTB33,CDX4,FLNA,HCFC1,MECP2,TBX22,ATRX,BCOR,HDAC8,MOSPD1,RPL10,SOX3,TAF1,NKAP,RBM10,KDM5C	HNSC
BP	negative regulation of nucleobase-containing compound metabolic process	1476	19	0.00645071	ZBTB33,CDX4,DKC1,FLNA,FMR1,HCFC1,MECP2,TBX22,ATRX,BCOR,RADX,HDAC8,MOSPD1,RPL10,TSPYL2,SOX3,TAF1,NKAP,RBM10,KDM5C	HNSC
BP	regulation of neurotransmitter secretion	90	3	0.0249823	FMR1,SYN1,SYP	HNSC
BP	positive regulation of receptor-mediated endocytosis	52	2	0.0492301	FMR1,APLN	HNSC
BP	negative regulation of cellular process	4739	44	0.016819	ZBTB33,FMR1-AS1,CDX4,PIM2,AMER1,DKC1,DLG3,TSC22D3,ABCB7,FHL1,FLNA,FMR1,KCNE5,GDI1,GLA,SLC25A5,HCFC1,XIAP,NEXMIF,ARAF,MECP2,FOXO4,MIR424,TBX22,PLXNB3,ATP7A,POU3F4,ATRX,BCOR,RADX,HDAC8,MOSPD1,MIR503,RAP2C,RPL10,TSPYL2,WDR13,SOX3,TAF1,TIMP1,NKAP,GPRASP3,RBM10,KDM5C,APLN,GPRASP1	HNSC
BP	negative regulation of smooth muscle cell proliferation	72	3	0.0113547	MIR424,MIR503,RBM10,APLN	HNSC
BP	nucleic acid transport	155	4	0.0275228	CETN2,FMR1,LUZP4,NXT2,UPF3B	HNSC
BP	RNA transport	155	4	0.0275228	CETN2,FMR1,LUZP4,NXT2,UPF3B	HNSC
BP	mRNA transport	122	4	0.0124177	CETN2,FMR1,LUZP4,NXT2,UPF3B	HNSC
BP	positive regulation of cellular component organization	1037	14	0.0129041	SLITRK4,DKC1,ABCB7,FLNA,FMR1,GDI1,SLC25A5,MECP2,PLXNB3,ATP7A,NLGN3,ATRX,GPRASP3,APLN	HNSC
BP	regulation of smooth muscle cell differentiation	43	2	0.0269216	MECP2,FOXO4,MIR424	HNSC
BP	negative regulation of smooth muscle cell differentiation	22	2	0.00673195	MECP2,FOXO4	HNSC
BP	regulation of nitrogen compound metabolic process	5502	48	0.0462317	ZBTB33,CDX4,MSL3,PIM2,AMER1,HDX,ASB9,ZXDB,DKC1,DLG3,TSC22D3,ZNF449,ABCB7,FLNA,FMR1,GLA,HCFC1,HNRNPH2,XIAP,ZNF81,ARAF,MECP2,FOXO4,TBX22,POU3F4,ATRX,BCOR,RADX,ZNF280C,HDAC8,MOSPD1,MIR503,RAP2C,RPL10,TSPYL2,UPF3B,SOX3,TAF1,TFE3,TIMP1,TRAF3,ZIC3,ZNF182,ZNF75D,NKAP,PPP1R2C,RBM10,KDM5C,APLN,FAM50A,MED12	HNSC
BP	positive regulation of sulfur metabolic process	3	1	0.0229713	ABCB7	HNSC
BP	establishment of RNA localization	158	4	0.029148	CETN2,FMR1,LUZP4,NXT2,UPF3B	HNSC
BP	regulation of RNA metabolic process	3557	35	0.0194075	ZBTB33,CDX4,MSL3,PIM2,HDX,ZXDB,DKC1,TSC22D3,ZNF449,FLNA,FMR1,HCFC1,HNRNPH2,ZNF81,MECP2,FOXO4,TBX22,POU3F4,ATRX,BCOR,ZNF280C,HDAC8,MOSPD1,RAP2C,RPL10,SOX3,TAF1,TFE3,TRAF3,ZIC3,ZNF182,ZNF75D,NKAP,RBM10,KDM5C,APLN,FAM50A,MED12	HNSC
BP	negative regulation of RNA metabolic process	1351	17	0.011455	ZBTB33,CDX4,DKC1,FLNA,FMR1,HCFC1,MECP2,TBX22,ATRX,BCOR,HDAC8,MOSPD1,RPL10,SOX3,TAF1,NKAP,RBM10,KDM5C	HNSC
BP	elastin biosynthetic process	2	1	0.0180904	ATP7A	HNSC
BP	histone H3-K9 methylation	35	2	0.0275449	MECP2,ATRX	HNSC
BP	regulation of histone H3-K4 methylation	39	2	0.0292595	HCFC1,BCOR	HNSC
BP	regulation of histone H3-K9 methylation	26	2	0.0145212	MECP2,ATRX	HNSC
BP	negative regulation of histone H3-K4 methylation	6	1	0.039597	BCOR	HNSC
BP	regulation of neurotransmitter transport	104	3	0.0356176	FMR1,SYN1,SYP	HNSC
BP	biological process involved in intraspecies interaction between organisms	53	2	0.0473006	MECP2,NLGN3	HNSC
BP	positive regulation of nervous system development	277	6	0.00950807	SLITRK4,GDI1,MECP2,PLXNB3,NLGN3,GPRASP3	HNSC
BP	regulation of synapse assembly	103	3	0.0276152	SLITRK4,NLGN3,GPRASP3	HNSC
BP	positive regulation of synapse assembly	62	3	0.00685262	SLITRK4,NLGN3,GPRASP3	HNSC
BP	copper ion homeostasis	19	2	0.00905563	XIAP,ATP7A	HNSC
BP	copper ion export	2	1	0.0179615	ATP7A	HNSC
BP	rhythmic synaptic transmission	3	1	0.0216089	NLGN3	HNSC
BP	apelin receptor signaling pathway	2	1	0.0170404	APLN	HNSC
BP	regulation of membrane repolarization	37	2	0.023351	FLNA,KCNE5	HNSC
BP	face development	50	2	0.0410452	SOX3,ZIC3	HNSC
BP	regulation of atrial cardiac muscle cell membrane repolarization	8	2	0.00117038	FLNA,KCNE5	HNSC
BP	regulation of apoptosis involved in tissue homeostasis	1	1	0.00716543	XIAP	HNSC
BP	regulation of dendritic spine development	53	2	0.0449965	FMR1,GPRASP3	HNSC
BP	positive regulation of dendritic spine development	35	2	0.0223814	FMR1,GPRASP3	HNSC
BP	Wnt protein secretion	5	1	0.0337909	PORCN	HNSC
BP	histone H3-K9 modification	47	2	0.0462869	MECP2,ATRX	HNSC
BP	articular cartilage development	5	1	0.0306399	BGN	HNSC
BP	specification of axis polarity	4	1	0.0246447	BCOR	HNSC
BP	vacuolar proton-transporting V-type ATPase complex assembly	6	1	0.0458691	VMA21	HNSC
BP	negative regulation of tooth mineralization	2	1	0.00809203	BCOR	HNSC
BP	protein localization to chromosome, telomeric region	30	2	0.021952	DKC1,ATRX	HNSC
BP	regulation of activation-induced cell death of T cells	4	1	0.0282748	TSC22D3	HNSC
BP	negative regulation of activation-induced cell death of T cells	3	1	0.0200458	TSC22D3	HNSC
BP	regulation of G0 to G1 transition	38	2	0.0314175	FOXO4,MIR424,MIR503	HNSC
BP	negative regulation of G0 to G1 transition	7	2	0.00110421	FOXO4,MIR424,MIR503	HNSC
BP	positive regulation of heme biosynthetic process	3	1	0.0242998	ABCB7	HNSC
BP	cellular response to cobalt ion	4	1	0.0309915	ATP7A	HNSC
BP	cellular response to lead ion	4	1	0.0333844	ATP7A	HNSC
BP	semaphorin-plexin signaling pathway	44	2	0.0302977	FLNA,PLXNB3	HNSC
BP	determination of digestive tract left/right asymmetry	7	1	0.0475236	ZIC3	HNSC
BP	determination of liver left/right asymmetry	6	1	0.0439405	ZIC3	HNSC
BP	cohesin loading	6	1	0.0452527	HDAC8	HNSC
BP	regulation of cohesin loading	4	1	0.0295907	HDAC8	HNSC
BP	mesenchymal cell differentiation involved in kidney development	8	1	0.0454753	AMER1	HNSC
BP	UDP-galactose transmembrane transport	4	1	0.0301062	SLC35A2	HNSC
BP	cardiac muscle cell action potential involved in contraction	53	2	0.0444982	FLNA,KCNE5	HNSC
BP	membrane repolarization	51	2	0.0443306	FLNA,KCNE5	HNSC
BP	membrane repolarization during action potential	30	2	0.0157342	FLNA,KCNE5	HNSC
BP	membrane repolarization during cardiac muscle cell action potential	25	2	0.0109851	FLNA,KCNE5	HNSC
BP	atrial cardiac muscle cell action potential	19	2	0.00653082	FLNA,KCNE5	HNSC
BP	cell-cell signaling involved in cardiac conduction	37	2	0.0230408	FLNA,KCNE5	HNSC
BP	atrial cardiac muscle cell to AV node cell signaling	19	2	0.00653082	FLNA,KCNE5	HNSC
BP	atrial cardiac muscle cell to AV node cell communication	19	2	0.00653082	FLNA,KCNE5	HNSC
BP	axis elongation involved in somitogenesis	4	1	0.0242601	MED12	HNSC
BP	nucleic acid metabolic process	5175	47	0.0224638	ZBTB33,CDX4,CETN2,UTP14A,MSL3,PIM2,HDX,ZXDB,DKC1,DNASE1L1,TSC22D3,ZNF449,FLNA,FMR1,APEX2,HCFC1,HNRNPH2,ZNF81,MECP2,FOXO4,TBX22,RBMX2,PIN4,POLA1,POU3F4,ATRX,BCOR,RADX,RBM41,ZNF280C,HDAC8,MOSPD1,RAP2C,RPL10,TSPYL2,UPF3B,SOX3,TAF1,TFE3,TRAF3,UBE2A,ZIC3,ZNF182,ZNF75D,NKAP,RBM10,KDM5C,APLN,TSR2,FAM50A,MED12	HNSC
BP	negative regulation of protein targeting to membrane	6	1	0.0365284	GDI1	HNSC
BP	scaRNA localization to Cajal body	5	1	0.03909	DKC1	HNSC
BP	telomerase RNA stabilization	4	1	0.0272915	DKC1	HNSC
BP	protein linear polyubiquitination	5	1	0.0361926	XIAP	HNSC
BP	telomeric repeat-containing RNA transcription	1	1	0.00851249	ATRX	HNSC
BP	telomeric repeat-containing RNA transcription by RNA polymerase II	1	1	0.00851249	ATRX	HNSC
BP	L-arginine import across plasma membrane	7	1	0.0466551	SLC7A3	HNSC
BP	L-lysine import across plasma membrane	2	1	0.0172832	SLC7A3	HNSC
BP	L-ornithine import across plasma membrane	1	1	0.00842402	SLC7A3	HNSC
BP	regulation of synaptic vesicle cycle	8	1	0.0449052	SYN1	HNSC
BP	regulation of neuronal action potential	5	1	0.036739	FMR1	HNSC
BP	membrane repolarization during atrial cardiac muscle cell action potential	7	1	0.0421178	FLNA	HNSC
BP	presynapse assembly	48	2	0.0366809	SLITRK4,NLGN3	HNSC
BP	presynapse organization	51	2	0.0419489	SLITRK4,NLGN3	HNSC
BP	trans-synaptic signaling by BDNF	4	1	0.0275309	MECP2	HNSC
BP	maintenance of mitotic sister chromatid cohesion, telomeric	2	1	0.0143393	ATRX	HNSC
BP	mitotic sister chromatid cohesion, telomeric	2	1	0.0143393	ATRX	HNSC
BP	synaptic vesicle cycle	190	4	0.0391251	FMR1,NLGN3,SYN1,SYP	HNSC
BP	cardiac muscle cell membrane repolarization	39	2	0.0268678	FLNA,KCNE5	HNSC
BP	regulation of cardiac muscle cell membrane repolarization	28	2	0.0139215	FLNA,KCNE5	HNSC
BP	atrial cardiac muscle cell membrane repolarization	11	2	0.00226609	FLNA,KCNE5	HNSC
BP	vascular endothelial cell proliferation	51	2	0.0421904	MIR424,MIR503,APLN	HNSC
BP	mitochondrial ADP transmembrane transport	4	1	0.0341305	SLC25A5	HNSC
BP	iron-sulfur cluster export from the mitochondrion	1	1	0.00929983	ABCB7	HNSC
BP	regulation of histone H3-K9 trimethylation	12	2	0.0036931	MECP2,ATRX	HNSC
[truncated: 61 more rows]
