# Supplementary material for: Attenuated sex-related DNA methylation differences in cancer highlight the magnitude bias mediating existing disparities
Source: Biol Sex Differ. 2024 Dec 23;15:106. doi: 10.1186/s13293-024-00682-4 (PMC11664931; doi:10.1186/s13293-024-00682-4)
Supplement: Supplementary file 10 — Supplementary material 10. [file 13293_2024_682_MOESM10_ESM.xlsx]

## Sheet: LIHC
Cancer	correlation	magnitude	Mean	SE
LIHC	0	equal	0.00898735	0.00283559
LIHC	1	equal	0.204323	0.00484803
LIHC	0.25	equal	0.0713918	0.00691627
LIHC	0.5	equal	0.0135733	0.00239673
LIHC	0.75	equal	0.177306	0.00689771
LIHC	-0.25	equal	0.00010362	7.9058e-05
LIHC	-0.5	equal	0	0
LIHC	-0.75	equal	0	0
LIHC	-1	equal	0	0
LIHC	1	female x1.5	0.0702522	0.00320524
LIHC	0.75	female x1.5	0.0178431	0.00300797
LIHC	0.5	female x1.5	0.00289707	0.00102471
LIHC	0.25	female x1.5	0.0647012	0.00664377
LIHC	0	female x1.5	0.0243821	0.00436575
LIHC	-0.25	female x1.5	0	0
LIHC	-0.5	female x1.5	0	0
LIHC	-0.75	female x1.5	0	0
LIHC	-1	female x1.5	0	0
LIHC	1	female x2	0.0179878	0.00207314
LIHC	0.75	female x2	0	0
LIHC	0.5	female x2	1.33277e-05	1.33277e-05
LIHC	0.25	female x2	0.0051208	0.00181825
LIHC	0	female x2	0.00852907	0.00265091
LIHC	-0.25	female x2	0	0
LIHC	-0.5	female x2	0	0
LIHC	-0.75	female x2	0	0
LIHC	-1	female x2	7.41023e-06	4.35715e-06
LIHC	1	female x3	0.00661395	0.000878955
LIHC	0.75	female x3	5.95919e-06	5.95919e-06
LIHC	0.5	female x3	0.000739913	0.000534161
LIHC	0.25	female x3	0.00214775	0.00133026
LIHC	0	female x3	0.0083038	0.00254386
LIHC	-0.25	female x3	0.000347903	0.000246511
LIHC	-0.5	female x3	6.54192e-05	6.54192e-05
LIHC	-0.75	female x3	5.13646e-06	5.13646e-06
LIHC	-1	female x3	1.35146e-05	1.00926e-05
LIHC	0	female-specific	0.100555	0.00218621
LIHC	1	male x1.5	0.0556088	0.00412807
LIHC	0.75	male x1.5	0	0
LIHC	0.5	male x1.5	0.00159511	0.000783344
LIHC	0.25	male x1.5	0.0143543	0.00254876
LIHC	0	male x1.5	0.0035087	0.00091357
LIHC	-0.25	male x1.5	0	0
LIHC	-0.5	male x1.5	0	0
LIHC	-0.75	male x1.5	0	0
LIHC	-1	male x1.5	0	0
LIHC	1	male x2	0.0339604	0.00389101
LIHC	0.75	male x2	0	0
LIHC	0.5	male x2	0	0
LIHC	0.25	male x2	0.00109492	0.00075224
LIHC	0	male x2	0.000389591	0.000260994
LIHC	-0.25	male x2	0	0
LIHC	-0.5	male x2	0	0
LIHC	-0.75	male x2	0	0
LIHC	-1	male x2	3.27048e-05	3.27048e-05
LIHC	1	male x3	0.0697533	0.00365119
LIHC	0.75	male x3	3.60295e-05	3.0451e-05
LIHC	0.5	male x3	2.00239e-05	2.00239e-05
LIHC	0.25	male x3	0	0
LIHC	0	male x3	0	0
LIHC	-0.25	male x3	0	0
LIHC	-0.5	male x3	2.06148e-05	2.06148e-05
LIHC	-0.75	male x3	0.000108952	0.000105696
LIHC	-1	male x3	0.000328605	0.000139868
LIHC	0	male-specific	0.00847763	0.00111905
LIHC	null	null	0.00449349	9.20583e-06

## Sheet: LUAD
Cancer	correlation	magnitude	Mean	SE
LUAD	0	equal	0	0
LUAD	1	equal	0.362708	0.00271057
LUAD	0.25	equal	0.00161708	0.000657293
LUAD	0.5	equal	0.00188771	0.000643818
LUAD	0.75	equal	0.0926482	0.00201111
LUAD	-0.25	equal	0	0
LUAD	-0.5	equal	0	0
LUAD	-0.75	equal	0	0
LUAD	-1	equal	0	0
LUAD	1	female x1.5	0.160554	0.00138431
LUAD	0.75	female x1.5	0	0
LUAD	0.5	female x1.5	0.0246403	0.00237843
LUAD	0.25	female x1.5	0.00571758	0.0012983
LUAD	0	female x1.5	0	0
LUAD	-0.25	female x1.5	0	0
LUAD	-0.5	female x1.5	0	0
LUAD	-0.75	female x1.5	2.5018e-07	2.5018e-07
LUAD	-1	female x1.5	0	0
LUAD	1	female x2	0.0202564	0.00133234
LUAD	0.75	female x2	0	0
LUAD	0.5	female x2	0.0152234	0.00203968
LUAD	0.25	female x2	0.00257666	0.000855192
LUAD	0	female x2	0	0
LUAD	-0.25	female x2	0	0
LUAD	-0.5	female x2	0	0
LUAD	-0.75	female x2	0	0
LUAD	-1	female x2	0	0
LUAD	1	female x3	0.012167	0.000908823
LUAD	0.75	female x3	0	0
LUAD	0.5	female x3	0.00251872	0.000690973
LUAD	0.25	female x3	0	0
LUAD	0	female x3	0	0
LUAD	-0.25	female x3	0	0
LUAD	-0.5	female x3	0	0
LUAD	-0.75	female x3	0	0
LUAD	-1	female x3	1.40663e-05	4.34081e-06
LUAD	0	female-specific	0.0159421	0.000504491
LUAD	1	male x1.5	0.152066	0.00154691
LUAD	0.75	male x1.5	0	0
LUAD	0.5	male x1.5	0.00227731	0.000837865
LUAD	0.25	male x1.5	0.00114588	0.000597022
LUAD	0	male x1.5	0	0
LUAD	-0.25	male x1.5	0	0
LUAD	-0.5	male x1.5	0	0
LUAD	-0.75	male x1.5	0	0
LUAD	-1	male x1.5	0	0
LUAD	1	male x2	0.0132306	0.00150074
LUAD	0.75	male x2	0	0
LUAD	0.5	male x2	0	0
LUAD	0.25	male x2	0	0
LUAD	0	male x2	0	0
LUAD	-0.25	male x2	0	0
LUAD	-0.5	male x2	0	0
LUAD	-0.75	male x2	0	0
LUAD	-1	male x2	0	0
LUAD	1	male x3	0.0282347	0.00108915
LUAD	0.75	male x3	0.00416549	0.000741827
LUAD	0.5	male x3	0.00342284	0.000884948
LUAD	0.25	male x3	0	0
LUAD	0	male x3	0	0
LUAD	-0.25	male x3	0	0
LUAD	-0.5	male x3	0	0
LUAD	-0.75	male x3	0	0
LUAD	-1	male x3	0	0
LUAD	0	male-specific	0.0754432	0.00089727
LUAD	null	null	0.00154236	3.42897e-06

## Sheet: LUSC
Cancer	correlation	magnitude	Mean	SE
LUSC	0	equal	0	0
LUSC	1	equal	0.429833	0.0020762
LUSC	0.25	equal	0	0
LUSC	0.5	equal	0	0
LUSC	0.75	equal	0.0586233	0.00196938
LUSC	-0.25	equal	0	0
LUSC	-0.5	equal	0	0
LUSC	-0.75	equal	0	0
LUSC	-1	equal	0	0
LUSC	1	female x1.5	0.167379	0.0011822
LUSC	0.75	female x1.5	0.00294621	0.000897566
LUSC	0.5	female x1.5	0	0
LUSC	0.25	female x1.5	0	0
LUSC	0	female x1.5	0	0
LUSC	-0.25	female x1.5	0	0
LUSC	-0.5	female x1.5	0	0
LUSC	-0.75	female x1.5	0	0
LUSC	-1	female x1.5	0	0
LUSC	1	female x2	0.0391229	0.00109917
LUSC	0.75	female x2	0.112883	0.00129869
LUSC	0.5	female x2	0	0
LUSC	0.25	female x2	0	0
LUSC	0	female x2	0	0
LUSC	-0.25	female x2	0	0
LUSC	-0.5	female x2	0	0
LUSC	-0.75	female x2	0	0
LUSC	-1	female x2	0	0
LUSC	1	female x3	0.0101332	0.00053533
LUSC	0.75	female x3	0.00664515	0.000825268
LUSC	0.5	female x3	0	0
LUSC	0.25	female x3	0	0
LUSC	0	female x3	0	0
LUSC	-0.25	female x3	0	0
LUSC	-0.5	female x3	0	0
LUSC	-0.75	female x3	0	0
LUSC	-1	female x3	0	0
LUSC	0	female-specific	0	0
LUSC	1	male x1.5	0.114953	0.00132834
LUSC	0.75	male x1.5	0.0469771	0.0014128
LUSC	0.5	male x1.5	0	0
LUSC	0.25	male x1.5	0	0
LUSC	0	male x1.5	0	0
LUSC	-0.25	male x1.5	0	0
LUSC	-0.5	male x1.5	0	0
LUSC	-0.75	male x1.5	0	0
LUSC	-1	male x1.5	0	0
LUSC	1	male x2	0.00964034	0.00110018
LUSC	0.75	male x2	0	0
LUSC	0.5	male x2	0	0
LUSC	0.25	male x2	0	0
LUSC	0	male x2	0	0
LUSC	-0.25	male x2	0	0
LUSC	-0.5	male x2	0	0
LUSC	-0.75	male x2	0	0
LUSC	-1	male x2	0	0
LUSC	1	male x3	0	0
LUSC	0.75	male x3	2.09316e-05	1.53155e-05
LUSC	0.5	male x3	0	0
LUSC	0.25	male x3	0	0
LUSC	0	male x3	3.01038e-06	3.01038e-06
LUSC	-0.25	male x3	0	0
LUSC	-0.5	male x3	0	0
LUSC	-0.75	male x3	1.57751e-06	1.57751e-06
LUSC	-1	male x3	7.30566e-06	1.98494e-06
LUSC	0	male-specific	2.35472e-05	6.07269e-06
LUSC	null	null	0.000806875	7.05419e-07

## Sheet: COAD
Cancer	correlation	magnitude	Mean	SE
COAD	0	equal	0	0
COAD	1	equal	0.385909	0.00256309
COAD	0.25	equal	0	0
COAD	0.5	equal	0	0
COAD	0.75	equal	0.184841	0.00253856
COAD	-0.25	equal	0	0
COAD	-0.5	equal	0	0
COAD	-0.75	equal	0	0
COAD	-1	equal	0	0
COAD	1	female x1.5	0.0675041	0.000899336
COAD	0.75	female x1.5	0	0
COAD	0.5	female x1.5	0	0
COAD	0.25	female x1.5	0	0
COAD	0	female x1.5	0	0
COAD	-0.25	female x1.5	0	0
COAD	-0.5	female x1.5	0	0
COAD	-0.75	female x1.5	0	0
COAD	-1	female x1.5	0	0
COAD	1	female x2	0.000728111	0.000316782
COAD	0.75	female x2	0.00309897	0.000869863
COAD	0.5	female x2	0	0
COAD	0.25	female x2	0	0
COAD	0	female x2	0	0
COAD	-0.25	female x2	0	0
COAD	-0.5	female x2	0	0
COAD	-0.75	female x2	0	0
COAD	-1	female x2	0	0
COAD	1	female x3	0.0145446	0.00134658
COAD	0.75	female x3	0.172596	0.00206485
COAD	0.5	female x3	0.000231423	0.000173833
COAD	0.25	female x3	4.03894e-05	4.03894e-05
COAD	0	female x3	0	0
COAD	-0.25	female x3	0	0
COAD	-0.5	female x3	0	0
COAD	-0.75	female x3	0	0
COAD	-1	female x3	0	0
COAD	0	female-specific	0.0371315	0.00114765
COAD	1	male x1.5	0.100724	0.0007492
COAD	0.75	male x1.5	0.000571035	0.000324799
COAD	0.5	male x1.5	0	0
COAD	0.25	male x1.5	0	0
COAD	0	male x1.5	0	0
COAD	-0.25	male x1.5	0	0
COAD	-0.5	male x1.5	0	0
COAD	-0.75	male x1.5	0	0
COAD	-1	male x1.5	0	0
COAD	1	male x2	0	0
COAD	0.75	male x2	0	0
COAD	0.5	male x2	0	0
COAD	0.25	male x2	0	0
COAD	0	male x2	0	0
COAD	-0.25	male x2	0	0
COAD	-0.5	male x2	0	0
COAD	-0.75	male x2	0	0
COAD	-1	male x2	0	0
COAD	1	male x3	0.0283737	0.000785363
COAD	0.75	male x3	0.000262491	5.39738e-05
COAD	0.5	male x3	2.80022e-05	1.51405e-05
COAD	0.25	male x3	5.28099e-05	4.23494e-05
COAD	0	male x3	0.000143162	8.43388e-05
COAD	-0.25	male x3	0.000147881	8.58824e-05
COAD	-0.5	male x3	0	0
COAD	-0.75	male x3	0	0
COAD	-1	male x3	8.18817e-07	8.18817e-07
COAD	0	male-specific	0.00172077	0.000213576
COAD	null	null	0.00134952	2.26735e-06

## Sheet: KIRC
Cancer	correlation	magnitude	Mean	SE
KIRC	0	equal	0.000152194	9.63714e-05
KIRC	1	equal	0.29019	0.00212537
KIRC	0.25	equal	0.000125531	9.23079e-05
KIRC	0.5	equal	0.0236113	0.00265433
KIRC	0.75	equal	0.18544	0.00438036
KIRC	-0.25	equal	1.86842e-05	1.86842e-05
KIRC	-0.5	equal	3.59605e-06	3.59605e-06
KIRC	-0.75	equal	4.49867e-05	2.04965e-05
KIRC	-1	equal	2.89869e-06	2.041e-06
KIRC	1	female x1.5	0.142961	0.00330093
KIRC	0.75	female x1.5	0.0435568	0.00339401
KIRC	0.5	female x1.5	3.45707e-05	3.45707e-05
KIRC	0.25	female x1.5	0	0
KIRC	0	female x1.5	0	0
KIRC	-0.25	female x1.5	5.02835e-05	2.7641e-05
KIRC	-0.5	female x1.5	2.47757e-05	1.4205e-05
KIRC	-0.75	female x1.5	0	0
KIRC	-1	female x1.5	0	0
KIRC	1	female x2	0.0507355	0.00230895
KIRC	0.75	female x2	0.0388679	0.00384239
KIRC	0.5	female x2	0	0
KIRC	0.25	female x2	0	0
KIRC	0	female x2	0	0
KIRC	-0.25	female x2	0	0
KIRC	-0.5	female x2	0	0
KIRC	-0.75	female x2	0	0
KIRC	-1	female x2	0	0
KIRC	1	female x3	0.0256993	0.000922432
KIRC	0.75	female x3	0.00940184	0.00117449
KIRC	0.5	female x3	0	0
KIRC	0.25	female x3	0	0
KIRC	0	female x3	0	0
KIRC	-0.25	female x3	0	0
KIRC	-0.5	female x3	0	0
KIRC	-0.75	female x3	0	0
KIRC	-1	female x3	0	0
KIRC	0	female-specific	0.0103771	0.000309165
KIRC	1	male x1.5	0.0796296	0.00172409
KIRC	0.75	male x1.5	1.32112e-05	9.88984e-06
KIRC	0.5	male x1.5	0	0
KIRC	0.25	male x1.5	0	0
KIRC	0	male x1.5	1.14892e-05	1.14892e-05
KIRC	-0.25	male x1.5	2.06211e-05	1.50739e-05
KIRC	-0.5	male x1.5	4.36585e-06	3.68755e-06
KIRC	-0.75	male x1.5	6.8013e-05	4.45631e-05
KIRC	-1	male x1.5	0	0
KIRC	1	male x2	0.0070456	0.00128355
KIRC	0.75	male x2	5.01096e-06	5.01096e-06
KIRC	0.5	male x2	0	0
KIRC	0.25	male x2	0	0
KIRC	0	male x2	0	0
KIRC	-0.25	male x2	0	0
KIRC	-0.5	male x2	0	0
KIRC	-0.75	male x2	1.41638e-05	1.0751e-05
KIRC	-1	male x2	0	0
KIRC	1	male x3	0.0745014	0.00134356
KIRC	0.75	male x3	0.00700286	0.00113836
KIRC	0.5	male x3	0.000386537	0.000208767
KIRC	0.25	male x3	0	0
KIRC	0	male x3	0	0
KIRC	-0.25	male x3	0	0
KIRC	-0.5	male x3	0	0
KIRC	-0.75	male x3	1.42185e-05	9.59416e-06
KIRC	-1	male x3	4.2291e-06	3.09653e-06
KIRC	0	male-specific	0.00895496	0.000687367
KIRC	null	null	0.00102524	8.31601e-07

## Sheet: KIRP
Cancer	correlation	magnitude	Mean	SE
KIRP	0	equal	3.17315e-05	2.97463e-05
KIRP	1	equal	0.382119	0.00105979
KIRP	0.25	equal	1.18596e-05	1.18596e-05
KIRP	0.5	equal	0	0
KIRP	0.75	equal	0.172706	0.00215643
KIRP	-0.25	equal	2.56427e-05	1.91196e-05
KIRP	-0.5	equal	1.9136e-06	1.9136e-06
KIRP	-0.75	equal	6.7798e-06	4.86975e-06
KIRP	-1	equal	0	0
KIRP	1	female x1.5	0.0401275	0.000402348
KIRP	0.75	female x1.5	0.0504762	0.00147041
KIRP	0.5	female x1.5	0	0
KIRP	0.25	female x1.5	6.70265e-05	4.95828e-05
KIRP	0	female x1.5	0.000105521	5.26896e-05
KIRP	-0.25	female x1.5	0.000196855	7.29213e-05
KIRP	-0.5	female x1.5	4.9626e-05	3.14817e-05
KIRP	-0.75	female x1.5	1.87469e-05	8.60156e-06
KIRP	-1	female x1.5	0	0
KIRP	1	female x2	0.00075449	0.000123284
KIRP	0.75	female x2	0.000273186	7.68941e-05
KIRP	0.5	female x2	2.42412e-06	2.42412e-06
KIRP	0.25	female x2	0.000151257	8.29707e-05
KIRP	0	female x2	0.00026167	8.37802e-05
KIRP	-0.25	female x2	0.000186218	7.69283e-05
KIRP	-0.5	female x2	4.798e-05	2.71098e-05
KIRP	-0.75	female x2	4.82363e-05	1.35397e-05
KIRP	-1	female x2	0	0
KIRP	1	female x3	0.000712008	6.9566e-05
KIRP	0.75	female x3	0.000506454	9.41357e-05
KIRP	0.5	female x3	0.00021911	6.96099e-05
KIRP	0.25	female x3	0.000375339	8.81268e-05
KIRP	0	female x3	0.000598186	0.000122652
KIRP	-0.25	female x3	0.000428506	9.97268e-05
KIRP	-0.5	female x3	8.90744e-05	3.265e-05
KIRP	-0.75	female x3	0.000117271	2.69632e-05
KIRP	-1	female x3	0	0
KIRP	0	female-specific	4.01312e-05	7.80621e-06
KIRP	1	male x1.5	0.281852	0.000722137
KIRP	0.75	male x1.5	0.000142597	4.55559e-05
KIRP	0.5	male x1.5	0	0
KIRP	0.25	male x1.5	6.68655e-06	6.68655e-06
KIRP	0	male x1.5	1.72285e-06	1.72285e-06
KIRP	-0.25	male x1.5	1.06457e-05	8.851e-06
KIRP	-0.5	male x1.5	0	0
KIRP	-0.75	male x1.5	7.66927e-06	7.66927e-06
KIRP	-1	male x1.5	0	0
KIRP	1	male x2	0.00205035	0.000479199
KIRP	0.75	male x2	0	0
KIRP	0.5	male x2	0	0
KIRP	0.25	male x2	6.36232e-06	4.77151e-06
KIRP	0	male x2	0	0
KIRP	-0.25	male x2	1.95734e-06	1.95734e-06
KIRP	-0.5	male x2	5.72118e-06	5.58475e-06
KIRP	-0.75	male x2	4.10066e-06	4.10066e-06
KIRP	-1	male x2	9.25711e-06	7.26994e-06
KIRP	1	male x3	0.0551881	0.000842294
KIRP	0.75	male x3	0.000711148	6.70016e-05
KIRP	0.5	male x3	0.000112535	3.34332e-05
KIRP	0.25	male x3	1.81301e-06	1.81301e-06
KIRP	0	male x3	6.68031e-06	6.68031e-06
KIRP	-0.25	male x3	5.56063e-05	2.53542e-05
KIRP	-0.5	male x3	9.88026e-05	2.78165e-05
KIRP	-0.75	male x3	8.3367e-05	2.52339e-05
KIRP	-1	male x3	0.000105717	3.19945e-05
KIRP	0	male-specific	0.00842677	0.000390006
KIRP	null	null	0.000354368	2.79926e-07

## Sheet: THCA
Cancer	correlation	magnitude	Mean	SE
THCA	0	equal	0	0
THCA	1	equal	0.323231	0.00299224
THCA	0.25	equal	0.000641533	0.000317727
THCA	0.5	equal	0.00043333	0.000247268
THCA	0.75	equal	0.13841	0.00708031
THCA	-0.25	equal	0	0
THCA	-0.5	equal	4.62246e-05	3.39855e-05
THCA	-0.75	equal	0.000104713	4.72162e-05
THCA	-1	equal	1.99235e-05	1.44612e-05
THCA	1	female x1.5	0.00410328	0.000738169
THCA	0.75	female x1.5	0.000969522	0.000493438
THCA	0.5	female x1.5	0	0
THCA	0.25	female x1.5	0	0
THCA	0	female x1.5	0	0
THCA	-0.25	female x1.5	0	0
THCA	-0.5	female x1.5	0	0
THCA	-0.75	female x1.5	0	0
THCA	-1	female x1.5	0	0
THCA	1	female x2	0.000811432	0.000343568
THCA	0.75	female x2	0.00015789	0.000136467
THCA	0.5	female x2	0	0
THCA	0.25	female x2	0	0
THCA	0	female x2	0	0
THCA	-0.25	female x2	0	0
THCA	-0.5	female x2	0	0
THCA	-0.75	female x2	0	0
THCA	-1	female x2	0	0
THCA	1	female x3	0.000475733	0.000147609
THCA	0.75	female x3	0.00131327	0.000578511
THCA	0.5	female x3	9.98367e-05	9.98367e-05
THCA	0.25	female x3	0.000133285	0.000133285
THCA	0	female x3	0	0
THCA	-0.25	female x3	0	0
THCA	-0.5	female x3	0	0
THCA	-0.75	female x3	8.99998e-05	6.34366e-05
THCA	-1	female x3	0	0
THCA	0	female-specific	0.00537487	0.000655216
THCA	1	male x1.5	0.165635	0.00244433
THCA	0.75	male x1.5	0.181457	0.00730705
THCA	0.5	male x1.5	0.0212963	0.00549281
THCA	0.25	male x1.5	0.0138594	0.00340544
THCA	0	male x1.5	0.000899475	0.000511804
THCA	-0.25	male x1.5	7.27091e-07	7.27091e-07
THCA	-0.5	male x1.5	0	0
THCA	-0.75	male x1.5	2.33123e-05	1.72498e-05
THCA	-1	male x1.5	2.16747e-05	1.47468e-05
THCA	1	male x2	0.00102311	0.000267661
THCA	0.75	male x2	0.0040587	0.00164553
THCA	0.5	male x2	0.00397703	0.0016803
THCA	0.25	male x2	0.0464003	0.00607146
THCA	0	male x2	0.00162858	0.000853327
THCA	-0.25	male x2	1.20951e-05	1.20951e-05
THCA	-0.5	male x2	2.24059e-05	2.24059e-05
THCA	-0.75	male x2	3.23417e-05	2.33401e-05
THCA	-1	male x2	4.24168e-06	3.6811e-06
THCA	1	male x3	0.000439801	0.000125301
THCA	0.75	male x3	0.000670019	0.000340995
THCA	0.5	male x3	0.00824787	0.00231123
THCA	0.25	male x3	0.0282416	0.00442155
THCA	0	male x3	0.0106428	0.00278583
THCA	-0.25	male x3	1.12756e-05	1.12756e-05
THCA	-0.5	male x3	1.35376e-05	9.58725e-06
THCA	-0.75	male x3	0.000115477	6.73374e-05
THCA	-1	male x3	2.6269e-05	1.49727e-05
THCA	0	male-specific	0.0304801	0.00175135
THCA	null	null	0.00434404	1.12985e-05

## Sheet: BLCA
Cancer	correlation	magnitude	Mean	SE
BLCA	0	equal	0.0167684	0.00247306
BLCA	1	equal	0.00936907	0.000587837
BLCA	0.25	equal	0.0163285	0.0030984
BLCA	0.5	equal	0.000272994	0.000272994
BLCA	0.75	equal	6.439e-06	6.439e-06
BLCA	-0.25	equal	0.00203128	0.000692434
BLCA	-0.5	equal	2.08126e-05	1.47904e-05
BLCA	-0.75	equal	0	0
BLCA	-1	equal	3.59756e-06	3.59756e-06
BLCA	1	female x1.5	0.000726784	0.000194897
BLCA	0.75	female x1.5	0.00180096	0.000660605
BLCA	0.5	female x1.5	0.0118083	0.00240171
BLCA	0.25	female x1.5	0.0640297	0.00373972
BLCA	0	female x1.5	0.00391372	0.00116027
BLCA	-0.25	female x1.5	0	0
BLCA	-0.5	female x1.5	2.95123e-05	2.95123e-05
BLCA	-0.75	female x1.5	1.60581e-06	1.60581e-06
BLCA	-1	female x1.5	3.72968e-06	2.63478e-06
BLCA	1	female x2	0.000175734	7.18246e-05
BLCA	0.75	female x2	0.000312289	0.000225304
BLCA	0.5	female x2	0.00518608	0.00113956
BLCA	0.25	female x2	0.000583257	0.000274003
BLCA	0	female x2	0	0
BLCA	-0.25	female x2	5.51242e-05	5.51242e-05
BLCA	-0.5	female x2	0	0
BLCA	-0.75	female x2	0	0
BLCA	-1	female x2	1.99172e-05	8.16937e-06
BLCA	1	female x3	0.000123792	4.59429e-05
BLCA	0.75	female x3	0.00027123	0.000239789
BLCA	0.5	female x3	0	0
BLCA	0.25	female x3	5.80281e-06	5.80281e-06
BLCA	0	female x3	0	0
BLCA	-0.25	female x3	0	0
BLCA	-0.5	female x3	0	0
BLCA	-0.75	female x3	0	0
BLCA	-1	female x3	9.42632e-06	6.83595e-06
BLCA	0	female-specific	9.49209e-06	7.33895e-06
BLCA	1	male x1.5	0.0336839	0.00243937
BLCA	0.75	male x1.5	0.00156305	0.000694366
BLCA	0.5	male x1.5	0	0
BLCA	0.25	male x1.5	0	0
BLCA	0	male x1.5	0	0
BLCA	-0.25	male x1.5	0.00274552	0.000787583
BLCA	-0.5	male x1.5	0.000153078	0.000153078
BLCA	-0.75	male x1.5	7.1621e-05	6.35613e-05
BLCA	-1	male x1.5	0	0
BLCA	1	male x2	0.291529	0.00797998
BLCA	0.75	male x2	0.068601	0.0033371
BLCA	0.5	male x2	0	0
BLCA	0.25	male x2	0	0
BLCA	0	male x2	0	0
BLCA	-0.25	male x2	0	0
BLCA	-0.5	male x2	0.000504323	0.00024929
BLCA	-0.75	male x2	0	0
BLCA	-1	male x2	0	0
BLCA	1	male x3	0.454774	0.00552794
BLCA	0.75	male x3	0.00886338	0.00199266
BLCA	0.5	male x3	0	0
BLCA	0.25	male x3	0	0
BLCA	0	male x3	0	0
BLCA	-0.25	male x3	2.78265e-06	2.78265e-06
BLCA	-0.5	male x3	0	0
BLCA	-0.75	male x3	0	0
BLCA	-1	male x3	5.47114e-05	2.06843e-05
BLCA	0	male-specific	2.65544e-05	1.92469e-05
BLCA	null	null	0.00355938	9.56588e-06

## Sheet: HNSC
Cancer	correlation	magnitude	Mean	SE
HNSC	0	equal	0	0
HNSC	1	equal	0.411812	0.00181799
HNSC	0.25	equal	0.00205259	0.000744554
HNSC	0.5	equal	0.0642378	0.00232908
HNSC	0.75	equal	0.0699574	0.00101452
HNSC	-0.25	equal	0	0
HNSC	-0.5	equal	0	0
HNSC	-0.75	equal	0	0
HNSC	-1	equal	0	0
HNSC	1	female x1.5	0.0635067	0.000839523
HNSC	0.75	female x1.5	0.000214276	0.000151198
HNSC	0.5	female x1.5	0.00336309	0.000708851
HNSC	0.25	female x1.5	0.00051702	0.000260089
HNSC	0	female x1.5	0	0
HNSC	-0.25	female x1.5	0	0
HNSC	-0.5	female x1.5	0	0
HNSC	-0.75	female x1.5	0	0
HNSC	-1	female x1.5	0	0
HNSC	1	female x2	0.0104841	0.000561637
HNSC	0.75	female x2	0	0
HNSC	0.5	female x2	7.72436e-05	7.72436e-05
HNSC	0.25	female x2	0	0
HNSC	0	female x2	0	0
HNSC	-0.25	female x2	0	0
HNSC	-0.5	female x2	0	0
HNSC	-0.75	female x2	0	0
HNSC	-1	female x2	0	0
HNSC	1	female x3	0.0108075	0.000399777
HNSC	0.75	female x3	0	0
HNSC	0.5	female x3	0	0
HNSC	0.25	female x3	0	0
HNSC	0	female x3	0	0
HNSC	-0.25	female x3	0	0
HNSC	-0.5	female x3	0	0
HNSC	-0.75	female x3	0	0
HNSC	-1	female x3	0	0
HNSC	0	female-specific	2.26717e-05	6.32286e-06
HNSC	1	male x1.5	0.267673	0.000982222
HNSC	0.75	male x1.5	2.72129e-06	2.72129e-06
HNSC	0.5	male x1.5	0.00553487	0.00108718
HNSC	0.25	male x1.5	0.00867677	0.0014908
HNSC	0	male x1.5	0	0
HNSC	-0.25	male x1.5	0	0
HNSC	-0.5	male x1.5	0	0
HNSC	-0.75	male x1.5	0	0
HNSC	-1	male x1.5	0	0
HNSC	1	male x2	0	0
HNSC	0.75	male x2	4.00746e-06	3.42501e-06
HNSC	0.5	male x2	0.00587764	0.000736399
HNSC	0.25	male x2	0.000692346	0.000260525
HNSC	0	male x2	0	0
HNSC	-0.25	male x2	0	0
HNSC	-0.5	male x2	0	0
HNSC	-0.75	male x2	0	0
HNSC	-1	male x2	4.82412e-07	3.04175e-07
HNSC	1	male x3	0.0708252	0.000850546
HNSC	0.75	male x3	0.001513	0.000110532
HNSC	0.5	male x3	1.47945e-05	1.13352e-05
HNSC	0.25	male x3	0	0
HNSC	0	male x3	0	0
HNSC	-0.25	male x3	0	0
HNSC	-0.5	male x3	0	0
HNSC	-0.75	male x3	0	0
HNSC	-1	male x3	0	0
HNSC	0	male-specific	0.00156618	0.000173235
HNSC	null	null	0.000565736	7.00496e-07
