# Supplementary material for: Attenuated sex-related DNA methylation differences in cancer highlight the magnitude bias mediating existing disparities
Source: Biol Sex Differ. 2024 Dec 23;15:106. doi: 10.1186/s13293-024-00682-4 (PMC11664931; doi:10.1186/s13293-024-00682-4)
Supplement: Supplementary file 11 — Supplementary material 11. [file 13293_2024_682_MOESM11_ESM.xlsx]

## Sheet: female-amplifier
CpG	Cancer
cg00128386	LIHC
cg00225067	LIHC
cg00280858	LIHC
cg00336946	LIHC
cg00341060	LIHC
cg00403579	LIHC
cg00434573	LIHC
cg00564759	LIHC
cg00576774	LIHC
cg00741410	LIHC
cg00918541	LIHC
cg01212562	LIHC
cg01307507	LIHC
cg01395254	LIHC
cg01530482	LIHC
cg01645729	LIHC
cg01714932	LIHC
cg01847206	LIHC
cg01975877	LIHC
cg02008627	LIHC
cg02080909	LIHC
cg02112681	LIHC
cg02188818	LIHC
cg02206259	LIHC
cg02291164	LIHC
cg02301740	LIHC
cg02471028	LIHC
cg02517524	LIHC
cg02537309	LIHC
cg02542218	LIHC
cg02553054	LIHC
cg02594426	LIHC
cg02614683	LIHC
cg02849507	LIHC
cg02867102	LIHC
cg03101580	LIHC
cg03127563	LIHC
cg03180953	LIHC
cg03347934	LIHC
cg03358684	LIHC
cg03378797	LIHC
cg03611809	LIHC
cg03676485	LIHC
cg03760191	LIHC
cg03781748	LIHC
cg04089703	LIHC
cg04244171	LIHC
cg04510459	LIHC
cg04592144	LIHC
cg04612488	LIHC
cg04757012	LIHC
cg04869379	LIHC
cg04897931	LIHC
cg04984818	LIHC
cg05009047	LIHC
cg05020510	LIHC
cg05062489	LIHC
cg05150973	LIHC
cg05361415	LIHC
cg05501426	LIHC
cg05545808	LIHC
cg05617798	LIHC
cg05647567	LIHC
cg05656374	LIHC
cg05708550	LIHC
cg05938285	LIHC
cg05972059	LIHC
cg05979320	LIHC
cg06071746	LIHC
cg06429138	LIHC
cg06430102	LIHC
cg06547285	LIHC
cg06735243	LIHC
cg06797253	LIHC
cg06802985	LIHC
cg06804091	LIHC
cg07297802	LIHC
cg07372034	LIHC
cg07797805	LIHC
cg07804577	LIHC
cg07824888	LIHC
cg07908654	LIHC
cg07964975	LIHC
cg07979316	LIHC
cg08216099	LIHC
cg08223651	LIHC
cg08369295	LIHC
cg08373169	LIHC
cg08438529	LIHC
cg08447571	LIHC
cg08589214	LIHC
cg08701566	LIHC
cg08729600	LIHC
cg08779982	LIHC
cg08819417	LIHC
cg08846327	LIHC
cg08918811	LIHC
cg09040896	LIHC
cg09042787	LIHC
cg09165170	LIHC
cg09175325	LIHC
cg09269891	LIHC
cg09293816	LIHC
cg09309024	LIHC
cg09417937	LIHC
cg09533293	LIHC
cg09571345	LIHC
cg09852389	LIHC
cg09870609	LIHC
cg10298992	LIHC
cg10374248	LIHC
cg10479063	LIHC
cg10640333	LIHC
cg10692140	LIHC
cg10798682	LIHC
cg11679673	LIHC
cg11729019	LIHC
cg11967592	LIHC
cg11998307	LIHC
cg11998932	LIHC
cg12109743	LIHC
cg12140867	LIHC
cg12159575	LIHC
cg12352038	LIHC
cg12418739	LIHC
cg12699768	LIHC
cg12704462	LIHC
cg12833018	LIHC
cg13213165	LIHC
cg13227806	LIHC
cg13440947	LIHC
cg13594432	LIHC
cg13678641	LIHC
cg13686795	LIHC
cg13798825	LIHC
cg13920529	LIHC
cg14023556	LIHC
cg14094460	LIHC
cg14174320	LIHC
cg14197831	LIHC
cg14295924	LIHC
cg14373380	LIHC
cg14549976	LIHC
cg14561362	LIHC
cg14596967	LIHC
cg14762896	LIHC
cg14825976	LIHC
cg14944696	LIHC
cg15026634	LIHC
cg15063366	LIHC
cg15138846	LIHC
cg15451020	LIHC
cg15580355	LIHC
cg15686949	LIHC
cg15912732	LIHC
cg15918766	LIHC
cg16044109	LIHC
cg16278077	LIHC
cg16423624	LIHC
cg16696234	LIHC
cg16751493	LIHC
cg16910911	LIHC
cg17032848	LIHC
cg17172761	LIHC
cg17214479	LIHC
cg17342247	LIHC
cg17818220	LIHC
cg17961378	LIHC
cg18016138	LIHC
cg18215449	LIHC
cg18232772	LIHC
cg18272377	LIHC
cg18322448	LIHC
cg18436246	LIHC
cg18558767	LIHC
cg18653372	LIHC
cg19043800	LIHC
cg19102271	LIHC
cg19423081	LIHC
cg19515518	LIHC
cg19774788	LIHC
cg19778015	LIHC
cg19822434	LIHC
cg19919217	LIHC
cg20729768	LIHC
cg20855160	LIHC
cg21049397	LIHC
cg21077300	LIHC
cg21522254	LIHC
cg21724796	LIHC
cg22046661	LIHC
cg22105534	LIHC
cg22152887	LIHC
cg22749173	LIHC
cg22839093	LIHC
cg22989419	LIHC
cg23012676	LIHC
cg23173806	LIHC
cg23239612	LIHC
cg23448153	LIHC
cg23460285	LIHC
cg23575603	LIHC
cg23585420	LIHC
cg23654174	LIHC
cg23843398	LIHC
cg23966361	LIHC
cg24318537	LIHC
cg24607755	LIHC
cg24617370	LIHC
cg24858591	LIHC
cg25004840	LIHC
cg25377915	LIHC
cg25533247	LIHC
cg25564800	LIHC
cg25764534	LIHC
cg26005086	LIHC
cg26219152	LIHC
cg26381457	LIHC
cg26429629	LIHC
cg26577252	LIHC
cg26589665	LIHC
cg26818786	LIHC
cg27206903	LIHC
cg27659014	LIHC
cg00021933	LUAD
cg00049323	LUAD
cg00100538	LUAD
cg00129196	LUAD
cg00159682	LUAD
cg00185336	LUAD
cg00187129	LUAD
cg00216961	LUAD
cg00238818	LUAD
cg00280758	LUAD
cg00300822	LUAD
cg00310375	LUAD
cg00323305	LUAD
cg00354641	LUAD
cg00356723	LUAD
cg00369677	LUAD
cg00394823	LUAD
cg00430895	LUAD
cg00446697	LUAD
cg00460776	LUAD
cg00492309	LUAD
cg00499822	LUAD
cg00500428	LUAD
cg00510447	LUAD
cg00529567	LUAD
cg00552318	LUAD
cg00575153	LUAD
cg00585901	LUAD
cg00648184	LUAD
cg00702638	LUAD
cg00714888	LUAD
cg00733786	LUAD
cg00743788	LUAD
cg00746143	LUAD
cg00750555	LUAD
cg00757207	LUAD
cg00759427	LUAD
cg00781839	LUAD
cg00795791	LUAD
cg00821483	LUAD
cg00831931	LUAD
cg00852783	LUAD
cg00866814	LUAD
cg00962781	LUAD
cg00971396	LUAD
cg00983637	LUAD
cg00988129	LUAD
cg00992417	LUAD
cg00996827	LUAD
cg01007345	LUAD
cg01010188	LUAD
cg01027937	LUAD
cg01032851	LUAD
cg01036779	LUAD
cg01090433	LUAD
cg01205299	LUAD
cg01219549	LUAD
cg01231543	LUAD
cg01233722	LUAD
cg01242619	LUAD
cg01261503	LUAD
cg01263222	LUAD
cg01275887	LUAD
cg01284467	LUAD
cg01288611	LUAD
cg01304145	LUAD
cg01308087	LUAD
cg01326048	LUAD
cg01340991	LUAD
cg01361351	LUAD
cg01367005	LUAD
cg01378515	LUAD
cg01383890	LUAD
cg01393234	LUAD
cg01485547	LUAD
cg01489398	LUAD
cg01535630	LUAD
cg01568244	LUAD
cg01581237	LUAD
cg01645729	LUAD
cg01656853	LUAD
cg01659586	LUAD
cg01693650	LUAD
cg01750157	LUAD
cg01766850	LUAD
cg01770232	LUAD
cg01771479	LUAD
cg01772014	LUAD
cg01792616	LUAD
cg01792666	LUAD
cg01799521	LUAD
cg01824933	LUAD
cg01827012	LUAD
cg01834614	LUAD
cg01839430	LUAD
cg01845091	LUAD
cg01850449	LUAD
cg01881046	LUAD
cg01881322	LUAD
cg01884917	LUAD
cg01959541	LUAD
cg02003183	LUAD
cg02048613	LUAD
cg02130107	LUAD
cg02131465	LUAD
cg02168592	LUAD
cg02174232	LUAD
cg02177648	LUAD
cg02189785	LUAD
cg02196651	LUAD
cg02196730	LUAD
cg02212836	LUAD
cg02297801	LUAD
cg02311152	LUAD
cg02342906	LUAD
cg02350627	LUAD
cg02371119	LUAD
cg02395127	LUAD
cg02421543	LUAD
cg02426464	LUAD
cg02460652	LUAD
cg02486497	LUAD
cg02521750	LUAD
cg02535674	LUAD
cg02538637	LUAD
cg02576092	LUAD
cg02650128	LUAD
cg02651190	LUAD
cg02657611	LUAD
cg02672737	LUAD
cg02686681	LUAD
cg02716826	LUAD
cg02772951	LUAD
cg02790305	LUAD
cg02828016	LUAD
cg02853152	LUAD
cg02861178	LUAD
cg02892577	LUAD
cg02931398	LUAD
cg02971793	LUAD
cg02994246	LUAD
cg02995055	LUAD
cg03013422	LUAD
cg03023900	LUAD
cg03045323	LUAD
cg03078239	LUAD
cg03078400	LUAD
cg03107310	LUAD
cg03126058	LUAD
cg03177025	LUAD
cg03283569	LUAD
cg03283842	LUAD
cg03299329	LUAD
cg03312532	LUAD
cg03331300	LUAD
cg03339247	LUAD
cg03373115	LUAD
cg03396152	LUAD
cg03424058	LUAD
cg03456560	LUAD
cg03460001	LUAD
cg03506452	LUAD
cg03531211	LUAD
cg03551243	LUAD
cg03552025	LUAD
cg03559836	LUAD
cg03623401	LUAD
cg03623878	LUAD
cg03688818	LUAD
cg03689092	LUAD
cg03712476	LUAD
cg03721976	LUAD
cg03723195	LUAD
cg03724759	LUAD
cg03729251	LUAD
cg03766998	LUAD
cg03783110	LUAD
cg03785076	LUAD
cg03799957	LUAD
cg03849279	LUAD
cg03859915	LUAD
cg03874653	LUAD
cg03896661	LUAD
cg03915012	LUAD
cg04003871	LUAD
cg04013090	LUAD
cg04016383	LUAD
cg04028616	LUAD
cg04080448	LUAD
cg04098263	LUAD
cg04100397	LUAD
cg04154911	LUAD
cg04155747	LUAD
cg04179940	LUAD
cg04218880	LUAD
cg04228042	LUAD
cg04271792	LUAD
cg04272011	LUAD
cg04312358	LUAD
cg04317651	LUAD
cg04348265	LUAD
cg04389398	LUAD
cg04402948	LUAD
cg04420878	LUAD
cg04429812	LUAD
cg04431186	LUAD
cg04466484	LUAD
cg04490178	LUAD
cg04586622	LUAD
cg04619046	LUAD
cg04630810	LUAD
cg04645070	LUAD
cg04662056	LUAD
cg04694492	LUAD
cg04769392	LUAD
cg04794690	LUAD
cg04797570	LUAD
cg04809787	LUAD
cg04834502	LUAD
cg04870460	LUAD
cg04871778	LUAD
cg04883026	LUAD
cg04927537	LUAD
cg04951739	LUAD
cg04987734	LUAD
cg05010865	LUAD
cg05027258	LUAD
cg05032848	LUAD
cg05036846	LUAD
cg05062178	LUAD
cg05068777	LUAD
cg05104283	LUAD
cg05115375	LUAD
cg05171693	LUAD
cg05197032	LUAD
cg05200250	LUAD
cg05202804	LUAD
cg05239504	LUAD
cg05287314	LUAD
cg05324368	LUAD
cg05337441	LUAD
cg05354479	LUAD
cg05386726	LUAD
cg05400252	LUAD
cg05406637	LUAD
cg05413199	LUAD
cg05447916	LUAD
cg05471495	LUAD
cg05546044	LUAD
cg05549575	LUAD
cg05582340	LUAD
cg05610278	LUAD
cg05614408	LUAD
cg05651778	LUAD
cg05732130	LUAD
cg05750962	LUAD
cg05751148	LUAD
cg05780177	LUAD
cg05835456	LUAD
cg05878390	LUAD
cg05886321	LUAD
cg05887079	LUAD
cg05895507	LUAD
cg05906092	LUAD
cg05940452	LUAD
cg05943655	LUAD
cg05945615	LUAD
cg05959932	LUAD
cg05973772	LUAD
cg06003834	LUAD
cg06029935	LUAD
cg06039074	LUAD
cg06041695	LUAD
cg06100227	LUAD
cg06135480	LUAD
cg06155414	LUAD
cg06211724	LUAD
cg06271652	LUAD
cg06306636	LUAD
cg06376214	LUAD
cg06377684	LUAD
cg06385324	LUAD
cg06390368	LUAD
cg06407634	LUAD
cg06429138	LUAD
cg06430102	LUAD
cg06462347	LUAD
cg06491116	LUAD
cg06499213	LUAD
cg06540636	LUAD
cg06569947	LUAD
cg06580745	LUAD
cg06624731	LUAD
cg06643271	LUAD
cg06653141	LUAD
cg06671340	LUAD
cg06686709	LUAD
cg06756164	LUAD
cg06766367	LUAD
cg06796709	LUAD
cg06801994	LUAD
cg06854487	LUAD
cg06884882	LUAD
cg06934523	LUAD
cg06942450	LUAD
cg06948408	LUAD
cg06958537	LUAD
cg06972019	LUAD
cg06978336	LUAD
cg06982544	LUAD
cg06988336	LUAD
cg06993413	LUAD
cg07000334	LUAD
cg07025312	LUAD
cg07059052	LUAD
cg07061500	LUAD
cg07076109	LUAD
cg07134608	LUAD
cg07145683	LUAD
cg07157333	LUAD
cg07189157	LUAD
cg07211684	LUAD
cg07216425	LUAD
cg07234028	LUAD
cg07236912	LUAD
cg07268431	LUAD
cg07290761	LUAD
cg07303143	LUAD
cg07318287	LUAD
cg07321467	LUAD
cg07392740	LUAD
cg07394299	LUAD
cg07435237	LUAD
cg07452625	LUAD
cg07455975	LUAD
cg07464217	LUAD
cg07495357	LUAD
cg07526656	LUAD
cg07571638	LUAD
cg07598021	LUAD
cg07599881	LUAD
cg07616499	LUAD
cg07647822	LUAD
cg07680533	LUAD
cg07697082	LUAD
cg07703790	LUAD
cg07716249	LUAD
cg07938459	LUAD
cg07945618	LUAD
cg07984358	LUAD
cg08021727	LUAD
cg08028901	LUAD
cg08042538	LUAD
cg08069931	LUAD
cg08110610	LUAD
cg08113562	LUAD
cg08129766	LUAD
cg08141659	LUAD
cg08149422	LUAD
cg08171483	LUAD
cg08216021	LUAD
cg08331427	LUAD
cg08348422	LUAD
cg08357990	LUAD
cg08375234	LUAD
cg08381537	LUAD
cg08407014	LUAD
cg08412188	LUAD
cg08478871	LUAD
cg08480098	LUAD
cg08513622	LUAD
cg08539620	LUAD
cg08577743	LUAD
cg08586366	LUAD
cg08614301	LUAD
cg08618451	LUAD
cg08647446	LUAD
cg08684361	LUAD
cg08684565	LUAD
cg08764914	LUAD
cg08774207	LUAD
cg08779982	LUAD
cg08837858	LUAD
cg08844325	LUAD
cg08869056	LUAD
cg08884974	LUAD
cg08904363	LUAD
cg08909802	LUAD
cg08976554	LUAD
cg08985063	LUAD
cg09010802	LUAD
cg09058748	LUAD
cg09142117	LUAD
cg09159452	LUAD
cg09165170	LUAD
cg09179046	LUAD
cg09179249	LUAD
cg09203312	LUAD
cg09248007	LUAD
cg09296270	LUAD
cg09325711	LUAD
cg09328228	LUAD
cg09416521	LUAD
cg09464735	LUAD
cg09464990	LUAD
cg09478002	LUAD
cg09487931	LUAD
cg09494609	LUAD
cg09496762	LUAD
cg09502809	LUAD
cg09549949	LUAD
cg09567173	LUAD
cg09608765	LUAD
cg09610766	LUAD
cg09618197	LUAD
cg09622982	LUAD
cg09676376	LUAD
cg09744759	LUAD
cg09820244	LUAD
cg09846581	LUAD
cg09863659	LUAD
cg09917807	LUAD
cg09934056	LUAD
cg09940677	LUAD
cg09960553	LUAD
cg09972561	LUAD
cg09990600	LUAD
cg09999582	LUAD
cg10020373	LUAD
cg10047173	LUAD
cg10071690	LUAD
cg10073091	LUAD
cg10078415	LUAD
cg10109215	LUAD
cg10154122	LUAD
cg10168330	LUAD
cg10184289	LUAD
cg10191814	LUAD
cg10216414	LUAD
cg10258385	LUAD
cg10272731	LUAD
cg10281378	LUAD
cg10290928	LUAD
cg10307052	LUAD
cg10314909	LUAD
cg10333802	LUAD
cg10378667	LUAD
cg10394610	LUAD
cg10429262	LUAD
cg10432620	LUAD
cg10433819	LUAD
cg10449665	LUAD
cg10472711	LUAD
cg10481740	LUAD
cg10502244	LUAD
cg10519271	LUAD
cg10539274	LUAD
cg10549973	LUAD
cg10569694	LUAD
cg10592926	LUAD
cg10725623	LUAD
cg10745272	LUAD
cg10776493	LUAD
cg10783149	LUAD
cg10792923	LUAD
cg10818219	LUAD
cg10818339	LUAD
cg10865444	LUAD
cg10885151	LUAD
cg10912634	LUAD
cg10922232	LUAD
cg11014073	LUAD
cg11015549	LUAD
cg11019014	LUAD
cg11024506	LUAD
cg11028923	LUAD
cg11033271	LUAD
cg11075346	LUAD
cg11075693	LUAD
cg11114465	LUAD
cg11185950	LUAD
cg11191040	LUAD
cg11207983	LUAD
cg11224624	LUAD
cg11229815	LUAD
cg11236746	LUAD
cg11247674	LUAD
cg11277665	LUAD
cg11348746	LUAD
cg11366683	LUAD
cg11423556	LUAD
cg11429111	LUAD
cg11430718	LUAD
cg11455040	LUAD
cg11460727	LUAD
cg11505026	LUAD
cg11569159	LUAD
cg11586448	LUAD
cg11636127	LUAD
cg11687085	LUAD
cg11707035	LUAD
cg11714430	LUAD
cg11744021	LUAD
cg11755933	LUAD
cg11783264	LUAD
cg11790673	LUAD
cg11807829	LUAD
cg11820929	LUAD
cg11830436	LUAD
cg11847442	LUAD
cg11912239	LUAD
cg11993173	LUAD
cg12003230	LUAD
cg12048674	LUAD
cg12054453	LUAD
cg12057190	LUAD
cg12067687	LUAD
cg12109968	LUAD
cg12126901	LUAD
cg12141030	LUAD
cg12188526	LUAD
cg12196901	LUAD
cg12258785	LUAD
cg12279138	LUAD
cg12303084	LUAD
cg12332536	LUAD
cg12335110	LUAD
cg12407978	LUAD
cg12426196	LUAD
cg12428326	LUAD
cg12432980	LUAD
cg12446953	LUAD
cg12457611	LUAD
cg12492835	LUAD
cg12558966	LUAD
cg12564097	LUAD
cg12590494	LUAD
cg12591951	LUAD
cg12593411	LUAD
cg12598025	LUAD
cg12608132	LUAD
cg12620935	LUAD
cg12640109	LUAD
cg12642431	LUAD
cg12663811	LUAD
cg12670305	LUAD
cg12682972	LUAD
cg12739119	LUAD
cg12744634	LUAD
cg12827283	LUAD
cg12866769	LUAD
cg12918536	LUAD
cg12939085	LUAD
cg12986611	LUAD
cg12989650	LUAD
cg13014333	LUAD
cg13028471	LUAD
cg13057055	LUAD
cg13063274	LUAD
cg13092901	LUAD
cg13096701	LUAD
cg13148085	LUAD
cg13151135	LUAD
cg13153865	LUAD
cg13161113	LUAD
cg13177786	LUAD
cg13301014	LUAD
cg13314310	LUAD
cg13314863	LUAD
cg13332807	LUAD
cg13355704	LUAD
cg13376158	LUAD
cg13403369	LUAD
cg13420744	LUAD
cg13450196	LUAD
cg13466383	LUAD
cg13477354	LUAD
cg13483597	LUAD
cg13495850	LUAD
cg13501446	LUAD
cg13514050	LUAD
cg13549667	LUAD
cg13562122	LUAD
cg13563728	LUAD
cg13564459	LUAD
cg13575139	LUAD
cg13604166	LUAD
cg13625187	LUAD
cg13654884	LUAD
cg13699808	LUAD
cg13724123	LUAD
cg13731808	LUAD
cg13795831	LUAD
cg13824156	LUAD
cg13833923	LUAD
cg13856643	LUAD
cg13877801	LUAD
cg13906823	LUAD
cg13909305	LUAD
cg13924554	LUAD
cg13933174	LUAD
cg13946767	LUAD
cg13960999	LUAD
cg13975303	LUAD
cg14028671	LUAD
cg14035521	LUAD
cg14050824	LUAD
cg14069287	LUAD
cg14084456	LUAD
cg14145667	LUAD
cg14180030	LUAD
cg14196790	LUAD
cg14202610	LUAD
cg14204430	LUAD
cg14206651	LUAD
cg14215786	LUAD
cg14216672	LUAD
cg14239346	LUAD
cg14275842	LUAD
cg14304515	LUAD
cg14311559	LUAD
cg14331619	LUAD
cg14381919	LUAD
cg14412967	LUAD
cg14415770	LUAD
cg14415844	LUAD
cg14459021	LUAD
cg14461974	LUAD
cg14488715	LUAD
cg14521746	LUAD
cg14525527	LUAD
cg14531530	LUAD
cg14776518	LUAD
cg14822966	LUAD
cg14836636	LUAD
cg14848289	LUAD
cg14865516	LUAD
cg14911690	LUAD
cg14924473	LUAD
cg14935716	LUAD
cg14975798	LUAD
cg14979593	LUAD
cg15124109	LUAD
cg15127443	LUAD
cg15141467	LUAD
cg15174117	LUAD
cg15183991	LUAD
cg15458504	LUAD
cg15472170	LUAD
cg15480897	LUAD
cg15495091	LUAD
cg15536830	LUAD
cg15547534	LUAD
cg15570148	LUAD
cg15572436	LUAD
cg15588266	LUAD
cg15605011	LUAD
cg15628956	LUAD
cg15668490	LUAD
cg15691199	LUAD
cg15712974	LUAD
cg15733114	LUAD
cg15735157	LUAD
cg15836733	LUAD
cg15871797	LUAD
cg15874481	LUAD
cg15898112	LUAD
cg15935247	LUAD
cg15946904	LUAD
cg15949277	LUAD
cg15958839	LUAD
cg15961044	LUAD
cg15964018	LUAD
cg15972949	LUAD
cg15975802	LUAD
cg16014770	LUAD
cg16026550	LUAD
cg16118089	LUAD
cg16131748	LUAD
cg16143804	LUAD
cg16146033	LUAD
cg16186001	LUAD
cg16187635	LUAD
cg16206090	LUAD
cg16284437	LUAD
cg16310045	LUAD
cg16310077	LUAD
cg16321523	LUAD
cg16326402	LUAD
cg16330146	LUAD
cg16336751	LUAD
cg16358155	LUAD
cg16365445	LUAD
cg16423756	LUAD
cg16465768	LUAD
cg16483490	LUAD
cg16500018	LUAD
cg16523148	LUAD
cg16589887	LUAD
cg16620032	LUAD
cg16620283	LUAD
cg16622514	LUAD
cg16634108	LUAD
cg16728114	LUAD
cg16747567	LUAD
cg16767964	LUAD
cg16784745	LUAD
cg16785213	LUAD
cg16797777	LUAD
cg16879247	LUAD
cg16884940	LUAD
cg16927606	LUAD
cg16974075	LUAD
cg16985708	LUAD
cg16988810	LUAD
cg17026838	LUAD
cg17093088	LUAD
cg17102069	LUAD
cg17118948	LUAD
cg17120578	LUAD
cg17127702	LUAD
cg17243289	LUAD
cg17272563	LUAD
cg17297328	LUAD
cg17306740	LUAD
cg17329292	LUAD
cg17419049	LUAD
cg17459219	LUAD
cg17467525	LUAD
cg17565299	LUAD
cg17566936	LUAD
cg17581065	LUAD
cg17602167	LUAD
cg17723299	LUAD
cg17724627	LUAD
cg17732690	LUAD
cg17786215	LUAD
cg17831440	LUAD
cg17858500	LUAD
cg17871793	LUAD
cg17901038	LUAD
cg17913068	LUAD
cg17942750	LUAD
cg18110444	LUAD
cg18116174	LUAD
cg18120111	LUAD
cg18135132	LUAD
cg18155101	LUAD
cg18240543	LUAD
cg18280717	LUAD
cg18327319	LUAD
cg18410627	LUAD
cg18416503	LUAD
cg18440048	LUAD
cg18483459	LUAD
cg18504190	LUAD
cg18505593	LUAD
cg18542688	LUAD
cg18563860	LUAD
cg18565103	LUAD
cg18693704	LUAD
cg18693985	LUAD
cg18710162	LUAD
cg18718204	LUAD
cg18738190	LUAD
cg18745317	LUAD
cg18809600	LUAD
cg18832152	LUAD
cg18864926	LUAD
cg18872604	LUAD
cg18886062	LUAD
cg18886436	LUAD
cg18923105	LUAD
cg18932008	LUAD
cg18948877	LUAD
cg19002941	LUAD
cg19150852	LUAD
cg19172447	LUAD
cg19174643	LUAD
cg19221841	LUAD
cg19234591	LUAD
cg19250790	LUAD
cg19255307	LUAD
cg19273773	LUAD
cg19278744	LUAD
cg19287349	LUAD
cg19294311	LUAD
cg19306368	LUAD
cg19343530	LUAD
cg19366147	LUAD
cg19372975	LUAD
cg19400316	LUAD
cg19400926	LUAD
cg19410770	LUAD
cg19414122	LUAD
cg19459094	LUAD
cg19463518	LUAD
cg19477978	LUAD
cg19532939	LUAD
cg19558628	LUAD
cg19565757	LUAD
cg19589494	LUAD
cg19592185	LUAD
cg19622755	LUAD
cg19643211	LUAD
cg19643921	LUAD
cg19653589	LUAD
cg19675142	LUAD
cg19693177	LUAD
cg19695805	LUAD
cg19718686	LUAD
cg19723715	LUAD
cg19753607	LUAD
cg19868593	LUAD
cg19870978	LUAD
cg19880542	LUAD
cg19897172	LUAD
cg19984146	LUAD
cg19993316	LUAD
cg20042116	LUAD
cg20089538	LUAD
cg20146489	LUAD
cg20174247	LUAD
cg20174696	LUAD
cg20176142	LUAD
cg20208979	LUAD
cg20265661	LUAD
cg20298015	LUAD
cg20334738	LUAD
cg20491406	LUAD
cg20513950	LUAD
cg20568402	LUAD
cg20575277	LUAD
cg20600338	LUAD
cg20603543	LUAD
cg20624041	LUAD
cg20632887	LUAD
cg20639948	LUAD
cg20687616	LUAD
cg20786131	LUAD
cg20827629	LUAD
cg20850016	LUAD
cg20961591	LUAD
cg20986875	LUAD
cg21060085	LUAD
cg21076680	LUAD
cg21094405	LUAD
cg21120678	LUAD
cg21195185	LUAD
cg21195843	LUAD
cg21199093	LUAD
cg21239660	LUAD
cg21241477	LUAD
cg21249754	LUAD
cg21270243	LUAD
cg21273275	LUAD
cg21282131	LUAD
cg21303011	LUAD
cg21337881	LUAD
cg21368094	LUAD
cg21368161	LUAD
cg21373156	LUAD
cg21465150	LUAD
cg21541638	LUAD
cg21577889	LUAD
cg21618333	LUAD
cg21657705	LUAD
cg21665774	LUAD
cg21870038	LUAD
cg21871883	LUAD
cg21876145	LUAD
cg21888059	LUAD
cg21917524	LUAD
cg21931656	LUAD
cg21950166	LUAD
cg21953025	LUAD
cg22048590	LUAD
cg22050733	LUAD
cg22176324	LUAD
cg22215453	LUAD
cg22235877	LUAD
cg22274829	LUAD
cg22275857	LUAD
cg22462235	LUAD
cg22478261	LUAD
cg22508782	LUAD
cg22522066	LUAD
cg22545356	LUAD
cg22563907	LUAD
cg22582113	LUAD
cg22584911	LUAD
cg22622834	LUAD
cg22633936	LUAD
cg22688399	LUAD
cg22689249	LUAD
cg22771548	LUAD
cg22825473	LUAD
cg22833809	LUAD
cg22846395	LUAD
cg22858288	LUAD
cg22908679	LUAD
cg22931402	LUAD
cg23009508	LUAD
cg23049737	LUAD
cg23060384	LUAD
cg23072711	LUAD
cg23099587	LUAD
cg23100863	LUAD
cg23125328	LUAD
cg23130731	LUAD
cg23158811	LUAD
cg23165541	LUAD
cg23179181	LUAD
cg23193759	LUAD
cg23221540	LUAD
cg23235154	LUAD
cg23248920	LUAD
cg23321140	LUAD
cg23330006	LUAD
cg23352146	LUAD
cg23387569	LUAD
cg23411036	LUAD
cg23413697	LUAD
cg23430664	LUAD
cg23439280	LUAD
cg23440816	LUAD
cg23453372	LUAD
cg23494957	LUAD
cg23514340	LUAD
cg23582919	LUAD
cg23617193	LUAD
cg23633330	LUAD
cg23654431	LUAD
cg23704627	LUAD
cg23709430	LUAD
cg23718606	LUAD
cg23759826	LUAD
cg23804620	LUAD
cg23861715	LUAD
cg23892924	LUAD
cg23893897	LUAD
cg23909343	LUAD
cg23916646	LUAD
cg23958533	LUAD
cg23974819	LUAD
cg23980468	LUAD
cg23982678	LUAD
cg24030037	LUAD
cg24057775	LUAD
cg24065328	LUAD
cg24085344	LUAD
cg24127869	LUAD
cg24155668	LUAD
cg24161057	LUAD
cg24185397	LUAD
cg24186398	LUAD
cg24224501	LUAD
cg24251800	LUAD
cg24301247	LUAD
cg24301690	LUAD
cg24342696	LUAD
cg24354624	LUAD
cg24390965	LUAD
cg24393699	LUAD
cg24411043	LUAD
cg24425316	LUAD
cg24460544	LUAD
cg24461304	LUAD
cg24463664	LUAD
cg24474037	LUAD
cg24480379	LUAD
cg24528523	LUAD
cg24585453	LUAD
cg24587268	LUAD
cg24652982	LUAD
cg24675098	LUAD
cg24690709	LUAD
cg24695281	LUAD
cg24704593	LUAD
cg24705426	LUAD
cg24766041	LUAD
cg24834823	LUAD
cg24859316	LUAD
cg24883265	LUAD
cg24888989	LUAD
cg24892139	LUAD
cg24898753	LUAD
cg24933605	LUAD
cg24951100	LUAD
cg24972297	LUAD
cg24989534	LUAD
cg25013852	LUAD
cg25016112	LUAD
cg25022915	LUAD
cg25033076	LUAD
cg25079743	LUAD
cg25195899	LUAD
cg25252598	LUAD
cg25266281	LUAD
cg25287474	LUAD
cg25301173	LUAD
cg25365006	LUAD
cg25387812	LUAD
cg25390506	LUAD
cg25483003	LUAD
cg25520910	LUAD
cg25548594	LUAD
cg25550753	LUAD
cg25564800	LUAD
cg25585523	LUAD
cg25588480	LUAD
cg25588852	LUAD
cg25597797	LUAD
cg25602159	LUAD
cg25649781	LUAD
cg25651608	LUAD
cg25671716	LUAD
cg25736251	LUAD
cg25737224	LUAD
cg25742464	LUAD
cg25750259	LUAD
cg25799994	LUAD
cg25817430	LUAD
cg25850044	LUAD
cg25882423	LUAD
cg25889465	LUAD
cg25946646	LUAD
cg25991756	LUAD
cg26015973	LUAD
cg26054057	LUAD
cg26064895	LUAD
cg26065909	LUAD
cg26078407	LUAD
cg26133068	LUAD
cg26172211	LUAD
cg26172812	LUAD
cg26192720	LUAD
cg26195652	LUAD
cg26229879	LUAD
cg26232504	LUAD
cg26254792	LUAD
cg26305504	LUAD
cg26351001	LUAD
cg26381783	LUAD
cg26388152	LUAD
cg26433975	LUAD
cg26479630	LUAD
cg26514793	LUAD
cg26516532	LUAD
cg26517140	LUAD
cg26530045	LUAD
cg26552361	LUAD
cg26575445	LUAD
cg26614815	LUAD
cg26764198	LUAD
cg26789064	LUAD
cg26808293	LUAD
cg26824709	LUAD
cg26829990	LUAD
cg26832686	LUAD
cg26904406	LUAD
cg26908825	LUAD
cg26959257	LUAD
cg26980529	LUAD
cg27003682	LUAD
cg27038724	LUAD
cg27052183	LUAD
cg27125965	LUAD
cg27143082	LUAD
cg27143204	LUAD
cg27145042	LUAD
cg27158867	LUAD
cg27180868	LUAD
cg27248029	LUAD
cg27268110	LUAD
cg27268279	LUAD
cg27277532	LUAD
cg27377749	LUAD
cg27388911	LUAD
cg27414087	LUAD
cg27427514	LUAD
cg27460824	LUAD
cg27496339	LUAD
cg27515052	LUAD
cg27524944	LUAD
cg27542422	LUAD
cg27543230	LUAD
cg27553372	LUAD
cg27559399	LUAD
cg27559724	LUAD
cg27574980	LUAD
cg27587645	LUAD
cg27596415	LUAD
cg27622506	LUAD
cg27631256	LUAD
cg27642428	LUAD
cg27650726	LUAD
cg27665659	LUAD
cg00025591	LUSC
cg00085061	LUSC
cg00160002	LUSC
cg00194126	LUSC
cg00253248	LUSC
cg00266604	LUSC
cg00280758	LUSC
cg00446697	LUSC
cg00537820	LUSC
cg00539174	LUSC
cg00567132	LUSC
cg00590761	LUSC
cg00691266	LUSC
cg00886954	LUSC
cg00903825	LUSC
cg01027937	LUSC
cg01083093	LUSC
cg01242619	LUSC
cg01263942	LUSC
cg01302240	LUSC
cg01324474	LUSC
cg01383890	LUSC
cg01448944	LUSC
cg01502407	LUSC
cg01637011	LUSC
cg01770571	LUSC
cg01827012	LUSC
cg01839430	LUSC
cg01962471	LUSC
cg02014217	LUSC
cg02053265	LUSC
cg02073763	LUSC
cg02196651	LUSC
cg02244204	LUSC
cg02297801	LUSC
cg02395280	LUSC
cg02771034	LUSC
cg02813863	LUSC
cg02829992	LUSC
cg02909991	LUSC
cg02971575	LUSC
cg03089651	LUSC
cg03137889	LUSC
cg03172226	LUSC
cg03630800	LUSC
cg03684062	LUSC
cg03766264	LUSC
cg03897412	LUSC
cg03932271	LUSC
cg03946762	LUSC
cg04038879	LUSC
cg04234016	LUSC
cg04291025	LUSC
cg04561637	LUSC
cg04610450	LUSC
cg04610667	LUSC
cg04654489	LUSC
cg04871778	LUSC
cg04964031	LUSC
cg05032848	LUSC
cg05093711	LUSC
cg05137680	LUSC
cg05289022	LUSC
cg05305434	LUSC
cg05353099	LUSC
cg05366475	LUSC
cg05517541	LUSC
cg05582979	LUSC
cg05625806	LUSC
cg05826245	LUSC
cg05835241	LUSC
cg05959508	LUSC
cg05973398	LUSC
cg06064964	LUSC
cg06125903	LUSC
cg06186041	LUSC
cg06348619	LUSC
cg06376214	LUSC
cg06544715	LUSC
cg06682445	LUSC
cg06690050	LUSC
cg06710694	LUSC
cg06718763	LUSC
cg06721796	LUSC
cg06811300	LUSC
cg06874403	LUSC
cg07061500	LUSC
cg07136054	LUSC
cg07189782	LUSC
cg07237979	LUSC
cg07281959	LUSC
cg07337290	LUSC
cg07370352	LUSC
cg07375256	LUSC
cg07464217	LUSC
cg07471156	LUSC
cg07594804	LUSC
cg07647771	LUSC
cg07860213	LUSC
cg07918620	LUSC
cg07933234	LUSC
cg08080174	LUSC
cg08106377	LUSC
cg08273740	LUSC
cg08288130	LUSC
cg08426951	LUSC
cg08461692	LUSC
cg08586669	LUSC
cg08732594	LUSC
cg08879111	LUSC
cg08911152	LUSC
cg09076123	LUSC
cg09104284	LUSC
cg09114153	LUSC
cg09122593	LUSC
cg09154880	LUSC
cg09223698	LUSC
cg09250072	LUSC
cg09278098	LUSC
cg09443360	LUSC
cg09496762	LUSC
cg09721047	LUSC
cg09861240	LUSC
cg09914304	LUSC
cg10023862	LUSC
cg10071690	LUSC
cg10116432	LUSC
cg10204692	LUSC
cg10371155	LUSC
cg10394610	LUSC
cg10514113	LUSC
cg10578952	LUSC
cg10579668	LUSC
cg10635645	LUSC
cg10700643	LUSC
cg10704729	LUSC
cg10761372	LUSC
cg10812236	LUSC
cg10880006	LUSC
cg10900526	LUSC
cg10954765	LUSC
cg11009596	LUSC
cg11065271	LUSC
cg11094040	LUSC
cg11117099	LUSC
cg11123545	LUSC
cg11197258	LUSC
cg11224624	LUSC
cg11270806	LUSC
cg11441693	LUSC
cg11625005	LUSC
cg11651615	LUSC
cg11687085	LUSC
cg11779113	LUSC
cg11855693	LUSC
cg11856711	LUSC
cg11869499	LUSC
cg11947245	LUSC
cg11965311	LUSC
cg12019990	LUSC
cg12048225	LUSC
cg12074585	LUSC
cg12199198	LUSC
cg12259140	LUSC
cg12279138	LUSC
cg12284521	LUSC
cg12309653	LUSC
cg12527684	LUSC
cg12589298	LUSC
cg12604331	LUSC
cg12641739	LUSC
cg12643458	LUSC
cg12643917	LUSC
cg12663811	LUSC
cg12665736	LUSC
cg12744634	LUSC
cg12927730	LUSC
cg12942414	LUSC
cg12989650	LUSC
cg13006424	LUSC
cg13091627	LUSC
cg13151135	LUSC
cg13153865	LUSC
cg13289869	LUSC
cg13477548	LUSC
cg13531667	LUSC
cg13597051	LUSC
cg13605690	LUSC
cg13641043	LUSC
cg13911697	LUSC
cg14047361	LUSC
cg14165096	LUSC
cg14220764	LUSC
cg14381919	LUSC
cg14462124	LUSC
cg14657458	LUSC
cg14672128	LUSC
cg14699903	LUSC
cg14778622	LUSC
cg14822966	LUSC
cg14852355	LUSC
cg14886990	LUSC
cg15001636	LUSC
cg15089387	LUSC
cg15089620	LUSC
cg15137213	LUSC
cg15183991	LUSC
cg15227994	LUSC
cg15262954	LUSC
cg15417249	LUSC
cg15465439	LUSC
cg15536230	LUSC
cg15626828	LUSC
cg15628708	LUSC
cg15633390	LUSC
cg15691199	LUSC
cg15721238	LUSC
cg15722438	LUSC
cg15847527	LUSC
cg15974867	LUSC
cg16007497	LUSC
cg16105510	LUSC
cg16110314	LUSC
cg16133703	LUSC
cg16209303	LUSC
cg16389078	LUSC
cg16509173	LUSC
cg16526705	LUSC
cg16555388	LUSC
cg16747828	LUSC
cg16785213	LUSC
cg16823430	LUSC
cg17140307	LUSC
cg17297238	LUSC
cg17319795	LUSC
cg17413460	LUSC
cg17577636	LUSC
cg17578639	LUSC
cg17611742	LUSC
cg17678038	LUSC
cg17678039	LUSC
cg17724184	LUSC
cg17770886	LUSC
cg17833746	LUSC
cg17879299	LUSC
cg17925308	LUSC
cg18160135	LUSC
cg18349022	LUSC
cg18375902	LUSC
cg18393044	LUSC
cg18413659	LUSC
cg18443392	LUSC
cg18563860	LUSC
cg18581405	LUSC
cg18595542	LUSC
cg18653372	LUSC
cg18710162	LUSC
cg18733230	LUSC
cg18825221	LUSC
cg18850434	LUSC
cg18853010	LUSC
cg19136632	LUSC
cg19148201	LUSC
cg19449565	LUSC
cg19640231	LUSC
cg19735421	LUSC
cg19980151	LUSC
cg20026673	LUSC
cg20227471	LUSC
cg20246820	LUSC
cg20315995	LUSC
cg20326647	LUSC
cg20337753	LUSC
cg20400171	LUSC
cg20416037	LUSC
cg20509513	LUSC
cg20560283	LUSC
cg20575277	LUSC
cg20607293	LUSC
cg20654468	LUSC
cg20708282	LUSC
cg20850016	LUSC
cg21026469	LUSC
cg21173447	LUSC
cg21274857	LUSC
cg21311067	LUSC
cg21337881	LUSC
cg21402832	LUSC
cg21435473	LUSC
cg21533897	LUSC
cg21657490	LUSC
cg21727141	LUSC
cg21773646	LUSC
cg21880128	LUSC
cg22018086	LUSC
cg22036538	LUSC
cg22117968	LUSC
cg22256354	LUSC
cg22289360	LUSC
cg22339313	LUSC
cg22356324	LUSC
cg22379708	LUSC
cg22629266	LUSC
cg23051123	LUSC
cg23100863	LUSC
cg23429047	LUSC
cg23454517	LUSC
cg23456595	LUSC
cg23502378	LUSC
cg23506842	LUSC
cg23507945	LUSC
cg23707478	LUSC
cg23718606	LUSC
cg23762517	LUSC
cg23851932	LUSC
cg23881299	LUSC
cg23894563	LUSC
cg23957372	LUSC
cg24107411	LUSC
cg24161057	LUSC
cg24370881	LUSC
cg24441911	LUSC
cg24619378	LUSC
cg24687805	LUSC
cg24700547	LUSC
cg24731702	LUSC
cg24771111	LUSC
cg24805026	LUSC
cg24843511	LUSC
cg24883605	LUSC
cg24955196	LUSC
cg24972297	LUSC
cg25133016	LUSC
cg25140531	LUSC
cg25336332	LUSC
cg25423146	LUSC
cg25550753	LUSC
cg25588852	LUSC
cg25607920	LUSC
cg25693349	LUSC
cg25750259	LUSC
cg25758567	LUSC
cg25765796	LUSC
cg25799994	LUSC
cg25889035	LUSC
cg26084949	LUSC
cg26233753	LUSC
cg26300517	LUSC
cg26322711	LUSC
cg26425555	LUSC
cg26489439	LUSC
cg26516004	LUSC
cg26680077	LUSC
cg26684776	LUSC
cg26763486	LUSC
cg26969933	LUSC
cg26985447	LUSC
cg27081107	LUSC
cg27177779	LUSC
cg27195326	LUSC
cg27366766	LUSC
cg27462160	LUSC
cg27511894	LUSC
cg27642528	LUSC
cg00073460	COAD
cg00074818	COAD
cg00127167	COAD
cg00144335	COAD
cg00301372	COAD
cg00350296	COAD
cg00390484	COAD
cg00446763	COAD
cg00522403	COAD
cg00532936	COAD
cg00604840	COAD
cg00805880	COAD
cg00865849	COAD
cg00868766	COAD
cg00932063	COAD
cg00937359	COAD
cg01007828	COAD
cg01202639	COAD
cg01285783	COAD
cg01479232	COAD
cg01492538	COAD
cg01554437	COAD
cg01581757	COAD
cg01704198	COAD
cg01717524	COAD
cg01765174	COAD
cg01923089	COAD
cg02058870	COAD
cg02078558	COAD
cg02246725	COAD
cg02318784	COAD
cg02399371	COAD
cg02484352	COAD
cg02551743	COAD
cg02578087	COAD
cg02604095	COAD
cg02650512	COAD
cg02732508	COAD
cg02736395	COAD
cg02772121	COAD
cg02838825	COAD
cg02898500	COAD
cg03017135	COAD
cg03020424	COAD
cg03059876	COAD
cg03161190	COAD
cg03217729	COAD
cg03305185	COAD
cg03308092	COAD
cg03387497	COAD
cg03611487	COAD
cg03758467	COAD
cg03891590	COAD
cg03963391	COAD
cg03989260	COAD
cg04030401	COAD
cg04223420	COAD
cg04243368	COAD
cg04318320	COAD
cg04388657	COAD
cg04406111	COAD
cg04466886	COAD
cg04573550	COAD
cg04615865	COAD
cg04624564	COAD
cg04769798	COAD
cg04882394	COAD
cg04987071	COAD
cg05036991	COAD
cg05068206	COAD
cg05129081	COAD
cg05207943	COAD
cg05258834	COAD
cg05260959	COAD
cg05453071	COAD
cg05465955	COAD
cg05573550	COAD
cg05711474	COAD
cg05719140	COAD
cg05753799	COAD
cg05849324	COAD
cg05962781	COAD
cg06005892	COAD
cg06205331	COAD
cg06383163	COAD
cg06834005	COAD
cg06846495	COAD
cg06999856	COAD
cg07128021	COAD
cg07274716	COAD
cg07471943	COAD
cg07483709	COAD
cg07670516	COAD
cg07726288	COAD
cg07746943	COAD
cg07755493	COAD
cg07759052	COAD
cg07835482	COAD
cg07862488	COAD
cg07986199	COAD
cg08140459	COAD
cg08287903	COAD
cg08319294	COAD
cg08343600	COAD
cg08421685	COAD
cg08433504	COAD
cg08456420	COAD
cg08492625	COAD
cg08548559	COAD
cg08688629	COAD
cg08688659	COAD
cg08693490	COAD
cg08702915	COAD
cg08958251	COAD
cg08962185	COAD
cg09105933	COAD
cg09142020	COAD
cg09226262	COAD
cg09281979	COAD
cg09303642	COAD
cg09318122	COAD
cg09523275	COAD
cg09533178	COAD
cg09550083	COAD
cg09591519	COAD
cg09671837	COAD
cg09897737	COAD
cg09926364	COAD
cg10078511	COAD
cg10133100	COAD
cg10136560	COAD
cg10236239	COAD
cg10257049	COAD
cg10262032	COAD
cg10333520	COAD
cg10359807	COAD
cg10419849	COAD
cg10464312	COAD
cg10640333	COAD
cg10667895	COAD
cg10785340	COAD
cg10815657	COAD
cg10855978	COAD
cg10891482	COAD
cg10972873	COAD
cg11294513	COAD
cg11426603	COAD
cg11517269	COAD
cg11557618	COAD
cg11613003	COAD
cg11613559	COAD
cg11794215	COAD
cg11884933	COAD
cg12050175	COAD
cg12065366	COAD
cg12103569	COAD
cg12130768	COAD
cg12175019	COAD
cg12187394	COAD
cg12238853	COAD
cg12320039	COAD
cg12355172	COAD
cg12389770	COAD
cg12453500	COAD
cg12496975	COAD
cg12583553	COAD
cg12608507	COAD
cg12623302	COAD
cg12743031	COAD
cg12756396	COAD
cg12782180	COAD
cg12795893	COAD
cg12801030	COAD
cg13015710	COAD
cg13088556	COAD
cg13093111	COAD
cg13445177	COAD
cg13769223	COAD
cg13826452	COAD
cg13858407	COAD
cg13971849	COAD
cg14096938	COAD
cg14156751	COAD
cg14165142	COAD
cg14195059	COAD
cg14288403	COAD
cg14328676	COAD
cg14435645	COAD
cg14552010	COAD
cg14566959	COAD
cg14614094	COAD
cg14672084	COAD
cg14762896	COAD
cg14834893	COAD
cg14898177	COAD
cg14898623	COAD
cg14905657	COAD
cg15035324	COAD
cg15036326	COAD
cg15065123	COAD
cg15138339	COAD
cg15148683	COAD
cg15349696	COAD
cg15408080	COAD
cg15473904	COAD
cg15503752	COAD
cg15511120	COAD
cg15676707	COAD
cg15705175	COAD
cg16105687	COAD
cg16217297	COAD
cg16296417	COAD
cg16341836	COAD
cg16479633	COAD
cg16538568	COAD
cg16544169	COAD
cg16547027	COAD
cg16583315	COAD
cg16824126	COAD
cg16926102	COAD
cg17143179	COAD
cg17187762	COAD
cg17218270	COAD
cg17239904	COAD
cg17250262	COAD
cg17338501	COAD
cg17445812	COAD
cg17517296	COAD
cg17588578	COAD
cg17834632	COAD
cg17885226	COAD
cg18016194	COAD
cg18158438	COAD
cg18184218	COAD
cg18184769	COAD
cg18236571	COAD
cg18248586	COAD
cg18477009	COAD
cg18568589	COAD
cg18712809	COAD
cg18996760	COAD
cg19115690	COAD
cg19116959	COAD
cg19187616	COAD
cg19191600	COAD
cg19289072	COAD
cg19489494	COAD
cg19568115	COAD
cg19599407	COAD
cg19618279	COAD
cg19622474	COAD
cg19689427	COAD
cg19800670	COAD
cg19903229	COAD
cg19979738	COAD
cg20128928	COAD
cg20167366	COAD
cg20210051	COAD
cg20284239	COAD
cg20320656	COAD
cg20446143	COAD
cg20699586	COAD
cg20937934	COAD
cg20995304	COAD
cg21008969	COAD
cg21145524	COAD
cg21211213	COAD
cg21252483	COAD
cg21406402	COAD
cg21572722	COAD
cg21659714	COAD
cg21761639	COAD
cg21830221	COAD
cg21846790	COAD
cg21851672	COAD
cg21974506	COAD
cg22023304	COAD
cg22047282	COAD
cg22340508	COAD
cg22484397	COAD
cg22488797	COAD
cg22827250	COAD
cg22878414	COAD
cg22889918	COAD
cg23018448	COAD
cg23155911	COAD
cg23243867	COAD
cg23352492	COAD
cg23520688	COAD
cg23528791	COAD
cg23605961	COAD
cg23627828	COAD
cg23849826	COAD
cg23856413	COAD
cg23924526	COAD
cg23933289	COAD
cg24084564	COAD
cg24331475	COAD
cg24366557	COAD
cg24414363	COAD
cg24430578	COAD
cg24539455	COAD
cg24596823	COAD
cg24678869	COAD
cg24822053	COAD
cg24921858	COAD
cg24964368	COAD
cg25010500	COAD
cg25070639	COAD
cg25135457	COAD
cg25247859	COAD
cg25318976	COAD
cg25376310	COAD
[truncated: 1,458 more rows]

## Sheet: male-amplifier
CpG	Cancer
cg00028336	LIHC
cg00043005	LIHC
cg00120825	LIHC
cg00146755	LIHC
cg00170236	LIHC
cg00220335	LIHC
cg00235887	LIHC
cg00314427	LIHC
cg00374105	LIHC
cg00490655	LIHC
cg00619188	LIHC
cg00651400	LIHC
cg00693599	LIHC
cg00849990	LIHC
cg00891541	LIHC
cg00978203	LIHC
cg01351300	LIHC
cg01432520	LIHC
cg01482969	LIHC
cg01603247	LIHC
cg01612158	LIHC
cg01703205	LIHC
cg01747665	LIHC
cg01923075	LIHC
cg01961752	LIHC
cg02017450	LIHC
cg02076598	LIHC
cg02149965	LIHC
cg02219997	LIHC
cg02246916	LIHC
cg02256631	LIHC
cg02270420	LIHC
cg02319818	LIHC
cg02329386	LIHC
cg02347356	LIHC
cg02360514	LIHC
cg02382109	LIHC
cg02583228	LIHC
cg02601525	LIHC
cg02634861	LIHC
cg02636004	LIHC
cg02668655	LIHC
cg02685680	LIHC
cg02938926	LIHC
cg03140557	LIHC
cg03205252	LIHC
cg03405260	LIHC
cg03459811	LIHC
cg03460756	LIHC
cg03528538	LIHC
cg03690187	LIHC
cg03744357	LIHC
cg03780648	LIHC
cg03796341	LIHC
cg03804240	LIHC
cg03844372	LIHC
cg03850035	LIHC
cg04198210	LIHC
cg04260955	LIHC
cg04264129	LIHC
cg04296699	LIHC
cg04350136	LIHC
cg04439215	LIHC
cg04505023	LIHC
cg04527220	LIHC
cg04696494	LIHC
cg04724807	LIHC
cg04730443	LIHC
cg04760348	LIHC
cg04830808	LIHC
cg04978583	LIHC
cg05021743	LIHC
cg05112120	LIHC
cg05117823	LIHC
cg05141341	LIHC
cg05160563	LIHC
cg05166354	LIHC
cg05184311	LIHC
cg05277122	LIHC
cg05346256	LIHC
cg05379541	LIHC
cg05405389	LIHC
cg05487895	LIHC
cg05626536	LIHC
cg05783554	LIHC
cg05798059	LIHC
cg05917419	LIHC
cg05951296	LIHC
cg05959464	LIHC
cg06045337	LIHC
cg06053376	LIHC
cg06081306	LIHC
cg06218186	LIHC
cg06238055	LIHC
cg06300886	LIHC
cg06350432	LIHC
cg06432753	LIHC
cg06552969	LIHC
cg06621080	LIHC
cg06692050	LIHC
cg06720361	LIHC
cg06766427	LIHC
cg06815887	LIHC
cg06829969	LIHC
cg06833778	LIHC
cg06841464	LIHC
cg06884679	LIHC
cg07155724	LIHC
cg07164047	LIHC
cg07191834	LIHC
cg07272677	LIHC
cg07471156	LIHC
cg07494259	LIHC
cg07523189	LIHC
cg07720334	LIHC
cg07723431	LIHC
cg07817892	LIHC
cg07856521	LIHC
cg07868599	LIHC
cg07888661	LIHC
cg08037235	LIHC
cg08201690	LIHC
cg08301307	LIHC
cg08364677	LIHC
cg08427717	LIHC
cg08584947	LIHC
cg08655206	LIHC
cg08692006	LIHC
cg08844698	LIHC
cg08849635	LIHC
cg08971171	LIHC
cg09038962	LIHC
cg09046979	LIHC
cg09051342	LIHC
cg09061454	LIHC
cg09071093	LIHC
cg09088720	LIHC
cg09130674	LIHC
cg09174555	LIHC
cg09185399	LIHC
cg09255966	LIHC
cg09357934	LIHC
cg09368075	LIHC
cg09409930	LIHC
cg09500443	LIHC
cg09502207	LIHC
cg09664215	LIHC
cg09762252	LIHC
cg09774007	LIHC
cg09828310	LIHC
cg09837037	LIHC
cg09867046	LIHC
cg09893016	LIHC
cg09954364	LIHC
cg10006762	LIHC
cg10030162	LIHC
cg10049631	LIHC
cg10063227	LIHC
cg10090568	LIHC
cg10096378	LIHC
cg10120657	LIHC
cg10218510	LIHC
cg10256726	LIHC
cg10369242	LIHC
cg10424974	LIHC
cg10556064	LIHC
cg10569694	LIHC
cg10614445	LIHC
cg10625247	LIHC
cg10626305	LIHC
cg10717610	LIHC
cg10772169	LIHC
cg10781408	LIHC
cg10803935	LIHC
cg10854423	LIHC
cg10888337	LIHC
cg10975889	LIHC
cg10995297	LIHC
cg11251690	LIHC
cg11299991	LIHC
cg11378575	LIHC
cg11418783	LIHC
cg11426662	LIHC
cg11533825	LIHC
cg11558212	LIHC
cg11624479	LIHC
cg11625933	LIHC
cg11738208	LIHC
cg11765288	LIHC
cg11787789	LIHC
cg11865900	LIHC
cg11926485	LIHC
cg11960677	LIHC
cg11994639	LIHC
cg12053004	LIHC
cg12304133	LIHC
cg12364994	LIHC
cg12390585	LIHC
cg12406822	LIHC
cg12441694	LIHC
cg12499316	LIHC
cg12516234	LIHC
cg12614090	LIHC
cg12697689	LIHC
cg12817352	LIHC
cg12934788	LIHC
cg13037245	LIHC
cg13225830	LIHC
cg13278795	LIHC
cg13338783	LIHC
cg13458651	LIHC
cg13473274	LIHC
cg13475484	LIHC
cg13620631	LIHC
cg13628057	LIHC
cg13714749	LIHC
cg13733008	LIHC
cg13871708	LIHC
cg13888853	LIHC
cg13977779	LIHC
cg13977835	LIHC
cg13994408	LIHC
cg13999606	LIHC
cg14023389	LIHC
cg14041452	LIHC
cg14059257	LIHC
cg14096180	LIHC
cg14134732	LIHC
cg14188840	LIHC
cg14189782	LIHC
cg14197071	LIHC
cg14275340	LIHC
cg14290616	LIHC
cg14369318	LIHC
cg14530382	LIHC
cg14709479	LIHC
cg14903331	LIHC
cg14911395	LIHC
cg15006681	LIHC
cg15015892	LIHC
cg15046062	LIHC
cg15162784	LIHC
cg15450098	LIHC
cg15498306	LIHC
cg15519786	LIHC
cg15574642	LIHC
cg15593510	LIHC
cg15652212	LIHC
cg15818632	LIHC
cg15913875	LIHC
cg15946312	LIHC
cg16117028	LIHC
cg16222581	LIHC
cg16361543	LIHC
cg16433265	LIHC
cg16444826	LIHC
cg16496024	LIHC
cg16515546	LIHC
cg16532185	LIHC
cg16533767	LIHC
cg16585682	LIHC
cg16663033	LIHC
cg16663980	LIHC
cg16782236	LIHC
cg16859931	LIHC
cg16898219	LIHC
cg17074353	LIHC
cg17134153	LIHC
cg17207266	LIHC
cg17423416	LIHC
cg17480254	LIHC
cg17497608	LIHC
cg17525357	LIHC
cg17528559	LIHC
cg17560832	LIHC
cg17573292	LIHC
cg17612991	LIHC
cg17688837	LIHC
cg17785802	LIHC
cg17810602	LIHC
cg17819732	LIHC
cg18086520	LIHC
cg18140889	LIHC
cg18261944	LIHC
cg18293633	LIHC
cg18327049	LIHC
cg18358952	LIHC
cg18384681	LIHC
cg18476530	LIHC
cg18507365	LIHC
cg18826958	LIHC
cg19069346	LIHC
cg19101566	LIHC
cg19127840	LIHC
cg19177125	LIHC
cg19245120	LIHC
cg19270309	LIHC
cg19368016	LIHC
cg19467202	LIHC
cg19526685	LIHC
cg19717060	LIHC
cg19817005	LIHC
cg20137179	LIHC
cg20140940	LIHC
cg20218460	LIHC
cg20256009	LIHC
cg20275928	LIHC
cg20282941	LIHC
cg20287790	LIHC
cg20309703	LIHC
cg20462493	LIHC
cg20544808	LIHC
cg20649285	LIHC
cg20653144	LIHC
cg20682639	LIHC
cg20698667	LIHC
cg20844427	LIHC
cg20844771	LIHC
cg20937139	LIHC
cg21023001	LIHC
cg21104276	LIHC
cg21117699	LIHC
cg21151061	LIHC
cg21229079	LIHC
cg21288685	LIHC
cg21312554	LIHC
cg21392700	LIHC
cg21425607	LIHC
cg21746724	LIHC
cg21765235	LIHC
cg21852589	LIHC
cg22124648	LIHC
cg22128328	LIHC
cg22137572	LIHC
cg22306173	LIHC
cg22494876	LIHC
cg22511877	LIHC
cg22531018	LIHC
cg22665096	LIHC
cg22683041	LIHC
cg22730459	LIHC
cg22799110	LIHC
cg22869944	LIHC
cg22888848	LIHC
cg23090936	LIHC
cg23167178	LIHC
cg23170495	LIHC
cg23175023	LIHC
cg23226763	LIHC
cg23314826	LIHC
cg23365135	LIHC
cg23430388	LIHC
cg23515702	LIHC
cg23575644	LIHC
cg23591609	LIHC
cg23821329	LIHC
cg23859635	LIHC
cg23928165	LIHC
cg23930334	LIHC
cg23931323	LIHC
cg24028809	LIHC
cg24367628	LIHC
cg24412714	LIHC
cg24432464	LIHC
cg24462247	LIHC
cg24568905	LIHC
cg24872425	LIHC
cg24974704	LIHC
cg25029197	LIHC
cg25053164	LIHC
cg25116882	LIHC
cg25119415	LIHC
cg25122752	LIHC
cg25241038	LIHC
cg25305776	LIHC
cg25306579	LIHC
cg25329734	LIHC
cg25378003	LIHC
cg25420238	LIHC
cg25628008	LIHC
cg25820257	LIHC
cg25916135	LIHC
cg25970471	LIHC
cg26160889	LIHC
cg26342535	LIHC
cg26351764	LIHC
cg26375010	LIHC
cg26395331	LIHC
cg26524306	LIHC
cg26714129	LIHC
cg26888227	LIHC
cg26915558	LIHC
cg26940328	LIHC
cg27000120	LIHC
cg27067425	LIHC
cg27235337	LIHC
cg27350104	LIHC
cg27411547	LIHC
cg27425413	LIHC
cg27456707	LIHC
cg27519622	LIHC
cg00084798	LUAD
cg00103568	LUAD
cg00116092	LUAD
cg00254017	LUAD
cg00329656	LUAD
cg00359285	LUAD
cg00376735	LUAD
cg00388812	LUAD
cg00423597	LUAD
cg00463767	LUAD
cg00803638	LUAD
cg00869668	LUAD
cg00875989	LUAD
cg01046746	LUAD
cg01049870	LUAD
cg01284438	LUAD
cg01294808	LUAD
cg01302656	LUAD
cg01311151	LUAD
cg01316476	LUAD
cg01353903	LUAD
cg01449136	LUAD
cg01460202	LUAD
cg01484075	LUAD
cg01525538	LUAD
cg01611679	LUAD
cg01612883	LUAD
cg01700290	LUAD
cg01729491	LUAD
cg01812047	LUAD
cg01877936	LUAD
cg01926813	LUAD
cg02037307	LUAD
cg02183564	LUAD
cg02311725	LUAD
cg02320543	LUAD
cg02371052	LUAD
cg02384543	LUAD
cg02467451	LUAD
cg02582669	LUAD
cg02668773	LUAD
cg02671826	LUAD
cg02685484	LUAD
cg02697373	LUAD
cg02712949	LUAD
cg02910451	LUAD
cg02920604	LUAD
cg02925248	LUAD
cg02983090	LUAD
cg03035653	LUAD
cg03064100	LUAD
cg03110787	LUAD
cg03151469	LUAD
cg03202564	LUAD
cg03292206	LUAD
cg03415742	LUAD
cg03453880	LUAD
cg03726532	LUAD
cg03776506	LUAD
cg03864483	LUAD
cg03938507	LUAD
cg03985459	LUAD
cg04025879	LUAD
cg04214370	LUAD
cg04223420	LUAD
cg04247717	LUAD
cg04455646	LUAD
cg04553307	LUAD
cg04558424	LUAD
cg04625871	LUAD
cg04628369	LUAD
cg04672103	LUAD
cg04798684	LUAD
cg04987122	LUAD
cg05054531	LUAD
cg05131483	LUAD
cg05132905	LUAD
cg05135729	LUAD
cg05155058	LUAD
cg05185738	LUAD
cg05390144	LUAD
cg05440785	LUAD
cg05446322	LUAD
cg05457620	LUAD
cg05498866	LUAD
cg05589845	LUAD
cg05603527	LUAD
cg05628049	LUAD
cg05654765	LUAD
cg05730368	LUAD
cg05759150	LUAD
cg05798608	LUAD
cg05944840	LUAD
cg06084952	LUAD
cg06126335	LUAD
cg06322988	LUAD
cg06388647	LUAD
cg06417454	LUAD
cg06570224	LUAD
cg06638795	LUAD
cg06698686	LUAD
cg06710464	LUAD
cg06993714	LUAD
cg07030287	LUAD
cg07046870	LUAD
cg07186032	LUAD
cg07371413	LUAD
cg07433663	LUAD
cg07658449	LUAD
cg07686035	LUAD
cg08062484	LUAD
cg08263066	LUAD
cg08352755	LUAD
cg08619385	LUAD
cg08751508	LUAD
cg08775137	LUAD
cg08875705	LUAD
cg08918811	LUAD
cg08972756	LUAD
cg09160020	LUAD
cg09519218	LUAD
cg09560082	LUAD
cg09786257	LUAD
cg09867953	LUAD
cg09896867	LUAD
cg09912552	LUAD
cg09917805	LUAD
cg09975715	LUAD
cg10006762	LUAD
cg10017626	LUAD
cg10055566	LUAD
cg10088890	LUAD
cg10186366	LUAD
cg10214581	LUAD
cg10504066	LUAD
cg10514113	LUAD
cg10528218	LUAD
cg10560420	LUAD
cg10844818	LUAD
cg10987503	LUAD
cg11036290	LUAD
cg11145633	LUAD
cg11218434	LUAD
cg11293610	LUAD
cg11321190	LUAD
cg11464895	LUAD
cg11794801	LUAD
cg11884933	LUAD
cg12190044	LUAD
cg12280471	LUAD
cg12301823	LUAD
cg12374506	LUAD
cg12404831	LUAD
cg12453631	LUAD
cg12485428	LUAD
cg12570975	LUAD
cg12607287	LUAD
cg12743638	LUAD
cg12847240	LUAD
cg13081600	LUAD
cg13094252	LUAD
cg13146484	LUAD
cg13300273	LUAD
cg13359689	LUAD
cg13449377	LUAD
cg13547053	LUAD
cg13655635	LUAD
cg13775533	LUAD
cg13781574	LUAD
cg13912196	LUAD
cg13935127	LUAD
cg13936863	LUAD
cg14118850	LUAD
cg14265704	LUAD
cg14298200	LUAD
cg14398661	LUAD
cg14468055	LUAD
cg14516183	LUAD
cg14592399	LUAD
cg14713217	LUAD
cg14746118	LUAD
cg14823851	LUAD
cg14834653	LUAD
cg14879645	LUAD
cg14883291	LUAD
cg15026634	LUAD
cg15110296	LUAD
cg15144631	LUAD
cg15168450	LUAD
cg15388462	LUAD
cg15446115	LUAD
cg15473083	LUAD
cg15553500	LUAD
cg15777760	LUAD
cg15818632	LUAD
cg15837233	LUAD
cg15948504	LUAD
cg15982261	LUAD
cg16011907	LUAD
cg16053651	LUAD
cg16086109	LUAD
cg16096531	LUAD
cg16213217	LUAD
cg16428357	LUAD
cg16545821	LUAD
cg16550264	LUAD
cg16668359	LUAD
cg16758800	LUAD
cg16817070	LUAD
cg17060157	LUAD
cg17284236	LUAD
cg17398613	LUAD
cg17592231	LUAD
cg17966560	LUAD
cg18084609	LUAD
cg18194945	LUAD
cg18475128	LUAD
cg18513624	LUAD
cg18676123	LUAD
cg18727700	LUAD
cg18908419	LUAD
cg19134568	LUAD
cg19173666	LUAD
cg19392831	LUAD
cg19592898	LUAD
cg19616372	LUAD
cg19632953	LUAD
cg19648306	LUAD
cg19800670	LUAD
cg19870370	LUAD
cg19912147	LUAD
cg20001791	LUAD
cg20046343	LUAD
cg20067471	LUAD
cg20366906	LUAD
cg20464143	LUAD
cg20699586	LUAD
cg20801476	LUAD
cg20847580	LUAD
cg20906291	LUAD
cg20935245	LUAD
cg20975733	LUAD
cg21831481	LUAD
cg21838979	LUAD
cg21929564	LUAD
cg21946667	LUAD
cg21988461	LUAD
cg22051586	LUAD
cg22057874	LUAD
cg22225065	LUAD
cg22303418	LUAD
cg22353551	LUAD
cg22399458	LUAD
cg22402850	LUAD
cg22442352	LUAD
cg22695906	LUAD
cg22757101	LUAD
cg22795586	LUAD
cg22827250	LUAD
cg22877212	LUAD
cg22920873	LUAD
cg22929099	LUAD
cg23032129	LUAD
cg23094674	LUAD
cg23179265	LUAD
cg23192918	LUAD
cg23193059	LUAD
cg23281123	LUAD
cg23322242	LUAD
cg23322933	LUAD
cg23516310	LUAD
cg23580000	LUAD
cg23616212	LUAD
cg23627350	LUAD
cg23655039	LUAD
cg23708288	LUAD
cg23780731	LUAD
cg24264679	LUAD
cg24442913	LUAD
cg24520862	LUAD
cg24522654	LUAD
cg24608087	LUAD
cg24683222	LUAD
cg24699005	LUAD
cg24724664	LUAD
cg24733624	LUAD
cg24755931	LUAD
cg24857399	LUAD
cg24938743	LUAD
cg25004981	LUAD
cg25255988	LUAD
cg25256924	LUAD
cg25323709	LUAD
cg25332717	LUAD
cg25351606	LUAD
cg25388800	LUAD
cg25541209	LUAD
cg25741837	LUAD
cg25921609	LUAD
cg25947525	LUAD
cg26094805	LUAD
cg26160573	LUAD
cg26169845	LUAD
cg26263675	LUAD
cg26306411	LUAD
cg26382586	LUAD
cg26509691	LUAD
cg26618703	LUAD
cg26681770	LUAD
cg26686927	LUAD
cg26872780	LUAD
cg26906217	LUAD
cg27215236	LUAD
cg27255275	LUAD
cg27399481	LUAD
cg27563529	LUAD
cg00014998	LUSC
cg00027081	LUSC
cg00053916	LUSC
cg00079224	LUSC
cg00173538	LUSC
cg00190795	LUSC
cg00191052	LUSC
cg00201779	LUSC
cg00261690	LUSC
cg00292071	LUSC
cg00302587	LUSC
cg00316875	LUSC
cg00369677	LUSC
cg00401745	LUSC
cg00445405	LUSC
cg00498816	LUSC
cg00506862	LUSC
cg00563566	LUSC
cg00666746	LUSC
cg00712280	LUSC
cg00730820	LUSC
cg00767581	LUSC
cg00782811	LUSC
cg00789143	LUSC
cg00792513	LUSC
cg00795125	LUSC
cg01044293	LUSC
cg01050965	LUSC
cg01055931	LUSC
cg01104277	LUSC
cg01109169	LUSC
cg01127291	LUSC
cg01203948	LUSC
cg01288611	LUSC
cg01300495	LUSC
cg01353903	LUSC
cg01354046	LUSC
cg01440570	LUSC
cg01446515	LUSC
cg01485975	LUSC
cg01534527	LUSC
cg01581084	LUSC
cg01594290	LUSC
cg01595717	LUSC
cg01780984	LUSC
cg01807688	LUSC
cg01932223	LUSC
cg02023138	LUSC
cg02063817	LUSC
cg02344497	LUSC
cg02372744	LUSC
cg02384543	LUSC
cg02390084	LUSC
cg02508229	LUSC
cg02604836	LUSC
cg02712949	LUSC
cg02736395	LUSC
cg02749105	LUSC
cg02761419	LUSC
cg02765535	LUSC
cg02784144	LUSC
cg02862885	LUSC
cg02909793	LUSC
cg02947450	LUSC
cg02979703	LUSC
cg03008405	LUSC
cg03058616	LUSC
cg03102494	LUSC
cg03166428	LUSC
cg03199745	LUSC
cg03217729	LUSC
cg03332892	LUSC
cg03350932	LUSC
cg03426344	LUSC
cg03558010	LUSC
cg03585720	LUSC
cg03680338	LUSC
cg03781262	LUSC
cg03848127	LUSC
cg03887438	LUSC
cg03915527	LUSC
cg03951833	LUSC
cg03971344	LUSC
cg04037732	LUSC
cg04095339	LUSC
cg04098763	LUSC
cg04110902	LUSC
cg04224247	LUSC
cg04237003	LUSC
cg04247508	LUSC
cg04406445	LUSC
cg04451448	LUSC
cg04605532	LUSC
cg04637372	LUSC
cg04688645	LUSC
cg04716478	LUSC
cg04782982	LUSC
cg04830124	LUSC
cg04985372	LUSC
cg05069228	LUSC
cg05098381	LUSC
cg05120074	LUSC
cg05264033	LUSC
cg05301609	LUSC
cg05355142	LUSC
cg05373863	LUSC
cg05400670	LUSC
cg05476522	LUSC
cg05767159	LUSC
cg05782454	LUSC
cg05815419	LUSC
cg05873085	LUSC
cg05887092	LUSC
cg05986853	LUSC
cg05999828	LUSC
cg06002524	LUSC
cg06005876	LUSC
cg06137651	LUSC
cg06181703	LUSC
cg06234064	LUSC
cg06365535	LUSC
cg06408533	LUSC
cg06518271	LUSC
cg06570224	LUSC
cg06676049	LUSC
cg06679270	LUSC
cg06704466	LUSC
cg06717750	LUSC
cg06740049	LUSC
cg06780777	LUSC
cg06794323	LUSC
cg06879746	LUSC
cg06888383	LUSC
cg06902099	LUSC
cg06926146	LUSC
cg06960164	LUSC
cg06985664	LUSC
cg06997114	LUSC
cg07039560	LUSC
cg07069575	LUSC
cg07095818	LUSC
cg07160746	LUSC
cg07172701	LUSC
cg07194250	LUSC
cg07234508	LUSC
cg07265444	LUSC
cg07369094	LUSC
cg07373578	LUSC
cg07523148	LUSC
cg07557173	LUSC
cg07618159	LUSC
cg07776419	LUSC
cg07931792	LUSC
cg08015382	LUSC
cg08082763	LUSC
cg08106279	LUSC
cg08122899	LUSC
cg08206079	LUSC
cg08209691	LUSC
cg08222702	LUSC
cg08482436	LUSC
cg08617833	LUSC
cg08644598	LUSC
cg08719777	LUSC
cg08726522	LUSC
cg08733172	LUSC
cg08783090	LUSC
cg08939847	LUSC
cg09013229	LUSC
cg09015973	LUSC
cg09182189	LUSC
cg09203199	LUSC
cg09278187	LUSC
cg09298971	LUSC
cg09357350	LUSC
cg09382107	LUSC
cg09542013	LUSC
cg09598437	LUSC
cg09686013	LUSC
cg09761247	LUSC
cg09796544	LUSC
cg09941143	LUSC
cg09975171	LUSC
cg09981914	LUSC
cg10061736	LUSC
cg10087556	LUSC
cg10506618	LUSC
cg10536955	LUSC
cg10606834	LUSC
cg10640072	LUSC
cg10646080	LUSC
cg10678630	LUSC
cg10690003	LUSC
cg10700483	LUSC
cg10804656	LUSC
cg10908447	LUSC
cg10958087	LUSC
cg11027217	LUSC
cg11142013	LUSC
cg11145643	LUSC
cg11179759	LUSC
cg11248896	LUSC
cg11390960	LUSC
cg11404992	LUSC
cg11409510	LUSC
cg11423556	LUSC
cg11441704	LUSC
cg11557618	LUSC
cg11579758	LUSC
cg11613427	LUSC
cg11616384	LUSC
cg11679455	LUSC
cg11687036	LUSC
cg11779239	LUSC
cg11782729	LUSC
cg11791481	LUSC
cg11795276	LUSC
cg11847964	LUSC
cg12021814	LUSC
cg12026858	LUSC
cg12099459	LUSC
cg12127282	LUSC
cg12204574	LUSC
cg12215739	LUSC
cg12287206	LUSC
cg12292492	LUSC
cg12453631	LUSC
cg12472218	LUSC
cg12483340	LUSC
cg12606911	LUSC
cg12646386	LUSC
cg12649175	LUSC
cg12663656	LUSC
cg12664938	LUSC
cg12686055	LUSC
cg12747410	LUSC
cg12905836	LUSC
cg12910906	LUSC
cg12932102	LUSC
cg13023623	LUSC
cg13028471	LUSC
cg13047869	LUSC
cg13082192	LUSC
cg13092108	LUSC
cg13259290	LUSC
cg13275322	LUSC
cg13370916	LUSC
cg13473894	LUSC
cg13503148	LUSC
cg13522114	LUSC
cg13572771	LUSC
cg13597544	LUSC
cg13702181	LUSC
cg13775533	LUSC
cg13784235	LUSC
cg13826247	LUSC
cg13861342	LUSC
cg13868361	LUSC
cg13929970	LUSC
cg13975362	LUSC
cg13977597	LUSC
cg14018172	LUSC
cg14250028	LUSC
cg14308254	LUSC
cg14322166	LUSC
cg14377152	LUSC
cg14405528	LUSC
cg14507634	LUSC
cg14766682	LUSC
cg14789818	LUSC
cg14792845	LUSC
cg14905657	LUSC
cg14962327	LUSC
cg14993900	LUSC
cg14994947	LUSC
cg15065627	LUSC
cg15068318	LUSC
cg15076217	LUSC
cg15160801	LUSC
cg15161959	LUSC
cg15209029	LUSC
cg15226029	LUSC
cg15285733	LUSC
cg15339231	LUSC
cg15383633	LUSC
cg15529344	LUSC
cg15540371	LUSC
cg15703790	LUSC
cg15748271	LUSC
cg15811515	LUSC
cg15908709	LUSC
cg15935770	LUSC
cg15968604	LUSC
cg16222326	LUSC
cg16244634	LUSC
cg16274678	LUSC
cg16362481	LUSC
cg16375820	LUSC
cg16399859	LUSC
cg16404157	LUSC
cg16435923	LUSC
cg16457797	LUSC
cg16465129	LUSC
cg16507755	LUSC
cg16580289	LUSC
cg16623157	LUSC
cg16657152	LUSC
cg16702815	LUSC
cg16704246	LUSC
cg16719865	LUSC
cg16730652	LUSC
cg16799982	LUSC
cg16898997	LUSC
cg16920238	LUSC
cg17083494	LUSC
cg17104824	LUSC
cg17161421	LUSC
cg17212304	LUSC
cg17276682	LUSC
cg17282395	LUSC
cg17284236	LUSC
cg17334937	LUSC
cg17395738	LUSC
cg17434154	LUSC
cg17451419	LUSC
cg17517296	LUSC
cg17553592	LUSC
cg17573933	LUSC
cg17586302	LUSC
cg17608570	LUSC
cg17703934	LUSC
cg17710066	LUSC
cg17959821	LUSC
cg18005337	LUSC
cg18014186	LUSC
cg18033092	LUSC
cg18095824	LUSC
cg18134562	LUSC
cg18150584	LUSC
cg18171097	LUSC
cg18183817	LUSC
cg18279004	LUSC
cg18356785	LUSC
cg18422972	LUSC
cg18433009	LUSC
cg18528593	LUSC
cg18644653	LUSC
cg18701970	LUSC
cg18731327	LUSC
cg18855195	LUSC
cg18878432	LUSC
cg18920088	LUSC
cg18926450	LUSC
cg18999185	LUSC
cg19009132	LUSC
cg19014295	LUSC
cg19016652	LUSC
cg19132680	LUSC
cg19250790	LUSC
cg19251656	LUSC
cg19286473	LUSC
cg19437325	LUSC
cg19553158	LUSC
cg19560287	LUSC
cg19595295	LUSC
cg19610869	LUSC
cg19619416	LUSC
cg19726363	LUSC
cg19770715	LUSC
cg19807237	LUSC
cg19861914	LUSC
cg19927373	LUSC
cg19945263	LUSC
cg20214535	LUSC
cg20225915	LUSC
cg20239391	LUSC
cg20293609	LUSC
cg20377305	LUSC
cg20415947	LUSC
cg20424400	LUSC
cg20451680	LUSC
cg20462493	LUSC
cg20699586	LUSC
cg20704330	LUSC
cg20817822	LUSC
cg20823772	LUSC
cg20929545	LUSC
cg20935165	LUSC
cg20978230	LUSC
cg20994097	LUSC
cg21180956	LUSC
cg21185674	LUSC
cg21380860	LUSC
cg21558752	LUSC
cg21582112	LUSC
cg21870229	LUSC
cg21878514	LUSC
cg21897034	LUSC
cg21900589	LUSC
cg21902772	LUSC
cg21905711	LUSC
cg21945949	LUSC
cg22067676	LUSC
cg22090245	LUSC
cg22143635	LUSC
cg22183373	LUSC
cg22257056	LUSC
cg22491058	LUSC
cg22582113	LUSC
cg22655251	LUSC
cg22680073	LUSC
cg22705835	LUSC
cg22728186	LUSC
cg22764782	LUSC
cg22797031	LUSC
cg22833612	LUSC
cg22880933	LUSC
cg22885052	LUSC
cg22887845	LUSC
cg22900057	LUSC
cg22953960	LUSC
cg22955387	LUSC
cg22959827	LUSC
cg22983694	LUSC
cg23050394	LUSC
cg23119977	LUSC
cg23124613	LUSC
cg23194346	LUSC
cg23212590	LUSC
cg23222278	LUSC
cg23245720	LUSC
cg23281972	LUSC
cg23337631	LUSC
cg23346781	LUSC
cg23417096	LUSC
cg23483563	LUSC
cg23531257	LUSC
cg23664174	LUSC
cg23685856	LUSC
cg23708288	LUSC
cg23780635	LUSC
cg23889013	LUSC
cg23912072	LUSC
cg23915701	LUSC
cg24134020	LUSC
cg24167372	LUSC
cg24200107	LUSC
cg24211214	LUSC
cg24397762	LUSC
cg24398933	LUSC
cg24402165	LUSC
cg24411961	LUSC
cg24447775	LUSC
cg24463290	LUSC
cg24540281	LUSC
cg24606701	LUSC
cg24863255	LUSC
cg25004981	LUSC
cg25075572	LUSC
cg25136495	LUSC
cg25214914	LUSC
cg25251019	LUSC
cg25283667	LUSC
cg25321114	LUSC
cg25331271	LUSC
cg25371314	LUSC
cg25528646	LUSC
cg25621991	LUSC
cg25630838	LUSC
cg25636556	LUSC
cg25670451	LUSC
cg25742035	LUSC
cg25750507	LUSC
cg25758314	LUSC
cg25769412	LUSC
cg25854298	LUSC
cg25930229	LUSC
cg25941682	LUSC
cg25951210	LUSC
cg25964744	LUSC
cg25968748	LUSC
cg26171523	LUSC
cg26185620	LUSC
cg26205859	LUSC
cg26215003	LUSC
cg26229879	LUSC
cg26296574	LUSC
cg26350092	LUSC
cg26353166	LUSC
cg26464446	LUSC
cg26481896	LUSC
cg26575637	LUSC
cg26704637	LUSC
cg26820378	LUSC
cg26834993	LUSC
cg26872588	LUSC
cg26929355	LUSC
cg26953234	LUSC
cg27045835	LUSC
cg27060386	LUSC
cg27110054	LUSC
cg27125177	LUSC
cg27160395	LUSC
cg27251473	LUSC
cg27392771	LUSC
cg27447477	LUSC
cg27502296	LUSC
cg27652869	LUSC
cg27656498	LUSC
cg00032912	COAD
cg00051952	COAD
cg00094913	COAD
cg00119073	COAD
cg00129785	COAD
cg00167275	COAD
cg00223767	COAD
cg00259249	COAD
cg00275828	COAD
cg00308130	COAD
cg00318947	COAD
cg00339782	COAD
cg00404599	COAD
cg00404923	COAD
cg00439384	COAD
cg00451635	COAD
cg00461236	COAD
cg00463859	COAD
cg00478421	COAD
cg00484488	COAD
cg00622552	COAD
cg00632486	COAD
cg00664697	COAD
cg00777271	COAD
cg00809111	COAD
cg00817367	COAD
cg00818106	COAD
cg00824381	COAD
cg00851518	COAD
cg00859858	COAD
cg00927231	COAD
cg00933696	COAD
cg00938816	COAD
cg00950343	COAD
cg01005506	COAD
cg01013171	COAD
cg01034396	COAD
cg01073668	COAD
cg01086672	COAD
cg01107874	COAD
cg01115432	COAD
cg01233392	COAD
cg01251360	COAD
cg01256846	COAD
cg01270709	COAD
cg01284033	COAD
cg01286665	COAD
cg01297349	COAD
cg01322975	COAD
cg01348584	COAD
cg01362243	COAD
cg01396774	COAD
cg01397521	COAD
cg01421119	COAD
cg01423964	COAD
cg01471293	COAD
cg01494399	COAD
cg01512155	COAD
cg01521274	COAD
cg01556275	COAD
cg01564818	COAD
cg01572694	COAD
cg01602001	COAD
cg01603095	COAD
cg01730928	COAD
cg01817009	COAD
cg01906946	COAD
cg01909856	COAD
cg01923099	COAD
cg01949002	COAD
cg01962414	COAD
cg02001060	COAD
cg02052956	COAD
cg02053964	COAD
cg02086349	COAD
cg02121547	COAD
cg02156680	COAD
cg02200373	COAD
cg02200642	COAD
cg02216246	COAD
cg02232542	COAD
cg02258201	COAD
cg02262923	COAD
cg02264079	COAD
cg02272851	COAD
cg02280644	COAD
cg02291365	COAD
cg02293044	COAD
cg02358862	COAD
cg02362246	COAD
cg02481307	COAD
cg02493217	COAD
cg02523844	COAD
cg02596427	COAD
cg02611122	COAD
cg02654291	COAD
cg02657828	COAD
cg02660165	COAD
cg02772619	COAD
cg02787737	COAD
cg02789515	COAD
cg02848875	COAD
cg02859934	COAD
cg02955354	COAD
cg02965931	COAD
cg03008707	COAD
cg03028216	COAD
cg03143486	COAD
cg03183540	COAD
cg03237648	COAD
cg03252296	COAD
cg03297901	COAD
cg03331514	COAD
cg03373714	COAD
cg03389164	COAD
cg03391464	COAD
cg03466198	COAD
cg03546360	COAD
cg03595161	COAD
cg03634775	COAD
cg03658985	COAD
cg03663556	COAD
cg03665360	COAD
cg03718241	COAD
cg03772384	COAD
cg03775350	COAD
cg03777083	COAD
cg03837106	COAD
cg03839161	COAD
cg03858663	COAD
cg03973622	COAD
cg04050728	COAD
cg04064050	COAD
cg04075990	COAD
cg04168474	COAD
cg04225046	COAD
cg04275947	COAD
cg04286194	COAD
cg04289575	COAD
cg04308040	COAD
cg04324276	COAD
cg04334651	COAD
cg04347414	COAD
cg04357965	COAD
cg04362096	COAD
cg04490945	COAD
cg04498913	COAD
cg04514249	COAD
cg04516112	COAD
cg04549162	COAD
cg04567517	COAD
cg04598517	COAD
cg04600297	COAD
cg04609499	COAD
cg04620298	COAD
cg04639610	COAD
cg04726374	COAD
cg04848349	COAD
cg04892422	COAD
cg04921989	COAD
cg04998671	COAD
cg05117638	COAD
cg05135288	COAD
cg05141234	COAD
cg05175353	COAD
cg05177060	COAD
cg05213609	COAD
cg05215575	COAD
cg05225996	COAD
cg05226462	COAD
cg05259836	COAD
cg05261299	COAD
cg05267955	COAD
cg05300378	COAD
cg05304729	COAD
cg05322916	COAD
cg05327864	COAD
cg05341260	COAD
cg05343811	COAD
cg05352688	COAD
cg05374982	COAD
cg05384271	COAD
cg05403469	COAD
cg05413199	COAD
cg05413628	COAD
cg05414556	COAD
cg05446659	COAD
cg05484788	COAD
cg05517976	COAD
cg05529039	COAD
cg05548425	COAD
cg05605944	COAD
cg05649391	COAD
cg05691543	COAD
cg05696153	COAD
cg05699921	COAD
cg05762488	COAD
cg05768403	COAD
cg05800289	COAD
cg05800339	COAD
cg05801573	COAD
cg05877109	COAD
cg05980782	COAD
cg05991401	COAD
cg06008511	COAD
cg06042148	COAD
cg06046085	COAD
cg06051411	COAD
cg06066452	COAD
cg06153873	COAD
cg06207778	COAD
cg06255006	COAD
cg06261066	COAD
cg06298519	COAD
cg06357940	COAD
cg06392574	COAD
cg06422039	COAD
cg06429887	COAD
cg06492372	COAD
cg06523556	COAD
cg06635946	COAD
cg06642677	COAD
cg06720361	COAD
cg06735598	COAD
cg06737912	COAD
cg06747543	COAD
cg06777352	COAD
cg06784824	COAD
cg06794323	COAD
cg06825878	COAD
cg06839111	COAD
cg06884882	COAD
cg06908857	COAD
cg06972019	COAD
cg06976485	COAD
cg06993714	COAD
cg07021906	COAD
cg07080358	COAD
cg07116712	COAD
cg07198552	COAD
cg07217824	COAD
cg07237979	COAD
cg07249730	COAD
cg07264666	COAD
cg07300534	COAD
cg07338464	COAD
cg07367302	COAD
cg07452776	COAD
cg07537821	COAD
cg07570498	COAD
cg07625783	COAD
cg07661480	COAD
cg07680533	COAD
cg07701307	COAD
cg07705835	COAD
cg07774251	COAD
cg07799277	COAD
cg07858973	COAD
cg07875786	COAD
cg07917031	COAD
cg07931190	COAD
cg07947930	COAD
cg07953015	COAD
cg07967228	COAD
cg07984515	COAD
cg08010619	COAD
cg08026464	COAD
cg08055663	COAD
cg08075204	COAD
cg08080660	COAD
cg08152546	COAD
cg08205639	COAD
cg08250918	COAD
cg08273740	COAD
cg08311343	COAD
cg08334984	COAD
cg08404702	COAD
cg08460580	COAD
cg08482167	COAD
cg08506874	COAD
cg08548498	COAD
cg08570639	COAD
cg08625564	COAD
cg08655206	COAD
cg08681293	COAD
cg08697944	COAD
cg08725366	COAD
cg08772567	COAD
cg08782677	COAD
cg08811332	COAD
cg08876103	COAD
cg08922729	COAD
cg08951452	COAD
cg09007236	COAD
cg09017941	COAD
cg09060610	COAD
cg09076788	COAD
cg09089421	COAD
cg09109724	COAD
cg09129067	COAD
cg09137301	COAD
cg09137630	COAD
cg09178385	COAD
cg09182189	COAD
cg09279949	COAD
cg09315367	COAD
cg09344348	COAD
cg09454892	COAD
cg09515442	COAD
cg09540676	COAD
cg09556043	COAD
cg09624870	COAD
cg09720420	COAD
cg09762242	COAD
cg09777775	COAD
cg09790628	COAD
cg09797390	COAD
cg09805403	COAD
cg09810089	COAD
cg09910271	COAD
cg10083464	COAD
cg10143507	COAD
cg10160612	COAD
cg10186131	COAD
cg10215884	COAD
cg10276404	COAD
cg10288278	COAD
cg10308673	COAD
cg10406295	COAD
cg10454529	COAD
cg10507988	COAD
cg10622644	COAD
cg10627737	COAD
cg10649042	COAD
cg10662179	COAD
cg10673833	COAD
cg10683341	COAD
cg10684486	COAD
cg10702418	COAD
cg10721220	COAD
cg10754705	COAD
cg10857905	COAD
cg10862018	COAD
cg10917602	COAD
cg10944383	COAD
cg10989517	COAD
cg10999598	COAD
cg11017065	COAD
cg11060666	COAD
cg11139446	COAD
cg11189761	COAD
cg11194545	COAD
cg11452043	COAD
cg11468993	COAD
cg11573679	COAD
cg11714200	COAD
cg11715228	COAD
cg11723848	COAD
cg11758945	COAD
cg11860434	COAD
cg11893763	COAD
cg11940495	COAD
cg11979011	COAD
cg12164922	COAD
cg12406027	COAD
cg12522599	COAD
cg12560128	COAD
cg12593746	COAD
cg12607188	COAD
cg12616923	COAD
cg12630983	COAD
cg12688965	COAD
cg12712747	COAD
cg12720921	COAD
cg12735838	COAD
cg12778065	COAD
cg12819826	COAD
cg12826247	COAD
cg12842316	COAD
cg12963560	COAD
cg13060704	COAD
cg13150596	COAD
cg13207733	COAD
cg13242199	COAD
cg13359998	COAD
cg13368805	COAD
cg13414270	COAD
cg13423140	COAD
cg13432294	COAD
cg13439730	COAD
cg13447684	COAD
cg13476072	COAD
cg13480493	COAD
cg13521941	COAD
cg13531667	COAD
cg13555415	COAD
cg13581779	COAD
cg13582226	COAD
cg13590876	COAD
cg13631075	COAD
cg13660719	COAD
cg13700197	COAD
cg13761284	COAD
cg13873269	COAD
cg13924996	COAD
cg13928306	COAD
cg13936668	COAD
cg13938187	COAD
cg13982037	COAD
cg13986215	COAD
cg13995193	COAD
cg14091103	COAD
cg14094409	COAD
cg14099457	COAD
cg14117392	COAD
cg14118226	COAD
cg14150774	COAD
cg14165772	COAD
cg14208613	COAD
cg14209920	COAD
cg14305701	COAD
cg14318199	COAD
cg14333542	COAD
cg14374089	COAD
cg14409559	COAD
cg14519356	COAD
cg14527564	COAD
cg14542503	COAD
cg14556909	COAD
cg14642259	COAD
cg14654171	COAD
cg14654966	COAD
cg14710529	COAD
cg14736365	COAD
cg14766682	COAD
cg14783814	COAD
cg14909614	COAD
cg14924469	COAD
cg14951132	COAD
cg14987309	COAD
cg15022359	COAD
cg15054077	COAD
cg15059065	COAD
cg15074974	COAD
cg15079885	COAD
cg15095327	COAD
cg15248577	COAD
cg15294851	COAD
cg15332871	COAD
cg15366127	COAD
cg15426006	COAD
cg15450098	COAD
cg15451258	COAD
cg15538427	COAD
cg15579650	COAD
cg15601682	COAD
cg15671996	COAD
cg15704521	COAD
cg15730857	COAD
cg15836733	COAD
cg15874092	COAD
cg15929109	COAD
cg15983109	COAD
cg15984718	COAD
cg16036584	COAD
cg16057408	COAD
cg16175497	COAD
cg16191087	COAD
cg16210355	COAD
cg16339238	COAD
cg16404903	COAD
cg16421285	COAD
cg16439823	COAD
cg16465027	COAD
cg16475478	COAD
cg16508480	COAD
cg16525330	COAD
cg16644023	COAD
cg16712468	COAD
cg16728604	COAD
cg16729415	COAD
cg16958467	COAD
cg17019292	COAD
cg17071957	COAD
cg17153122	COAD
cg17331296	COAD
cg17371081	COAD
cg17396404	COAD
cg17459204	COAD
cg17460003	COAD
cg17531288	COAD
cg17670237	COAD
cg17779002	COAD
cg17807528	COAD
cg17814814	COAD
cg17826679	COAD
cg17835180	COAD
cg17839959	COAD
cg17872757	COAD
cg18026225	COAD
cg18053607	COAD
cg18141902	COAD
cg18156601	COAD
cg18177819	COAD
cg18186672	COAD
cg18192074	COAD
cg18226700	COAD
cg18261909	COAD
cg18278519	COAD
cg18468235	COAD
cg18527574	COAD
cg18640444	COAD
cg18640536	COAD
cg18672030	COAD
cg18692070	COAD
cg18719939	COAD
cg18720506	COAD
cg18804667	COAD
cg18978531	COAD
cg18991240	COAD
cg19004565	COAD
cg19034132	COAD
cg19040077	COAD
cg19083265	COAD
cg19267457	COAD
cg19356515	COAD
cg19391247	COAD
cg19427746	COAD
cg19445322	COAD
cg19529732	COAD
cg19544707	COAD
cg19590439	COAD
cg19599666	COAD
cg19599827	COAD
cg19664945	COAD
cg19683073	COAD
cg19707677	COAD
cg19741660	COAD
cg19793809	COAD
cg19815565	COAD
cg19880597	COAD
cg19889780	COAD
cg19906672	COAD
cg19910382	COAD
cg19928294	COAD
cg19936954	COAD
cg20144984	COAD
cg20207108	COAD
cg20497504	COAD
cg20510285	COAD
cg20544372	COAD
cg20669292	COAD
cg20705627	COAD
cg20722590	COAD
cg20740711	COAD
cg20752683	COAD
cg20780998	COAD
cg20816361	COAD
cg20833128	COAD
cg20834178	COAD
cg20864608	COAD
cg20912205	COAD
cg20915632	COAD
cg20934096	COAD
cg20954533	COAD
cg20986307	COAD
cg21012061	COAD
cg21084119	COAD
cg21120047	COAD
cg21190361	COAD
cg21210376	COAD
cg21213593	COAD
cg21307723	COAD
cg21330896	COAD
cg21363050	COAD
cg21370924	COAD
cg21377007	COAD
cg21445230	COAD
cg21465176	COAD
cg21474062	COAD
cg21499869	COAD
cg21621906	COAD
cg21672057	COAD
cg21897676	COAD
cg21906379	COAD
cg21958090	COAD
cg22162848	COAD
cg22164298	COAD
cg22233189	COAD
cg22307444	COAD
cg22361106	COAD
cg22386008	COAD
cg22454744	COAD
cg22460896	COAD
cg22488352	COAD
cg22507154	COAD
cg22531018	COAD
cg22572908	COAD
cg22621734	COAD
cg22670572	COAD
cg22679626	COAD
cg22718031	COAD
cg22724943	COAD
cg22730004	COAD
cg22759096	COAD
cg22820188	COAD
cg22885052	COAD
cg22905866	COAD
cg22961212	COAD
cg22965943	COAD
cg22989103	COAD
cg22990967	COAD
cg23004160	COAD
cg23026995	COAD
cg23053961	COAD
cg23159704	COAD
cg23165541	COAD
cg23178550	COAD
cg23192614	COAD
cg23297872	COAD
cg23322242	COAD
cg23361275	COAD
cg23373640	COAD
cg23451678	COAD
cg23488607	COAD
cg23575876	COAD
cg23690264	COAD
cg23741006	COAD
cg23878564	COAD
cg23949574	COAD
cg23989768	COAD
cg23999170	COAD
cg24008177	COAD
cg24021846	COAD
cg24021956	COAD
cg24057710	COAD
cg24096415	COAD
cg24171907	COAD
cg24198944	COAD
cg24217894	COAD
cg24227481	COAD
cg24235518	COAD
cg24266670	COAD
cg24301930	COAD
cg24345715	COAD
cg24348240	COAD
cg24393844	COAD
cg24410453	COAD
cg24433189	COAD
cg24480379	COAD
cg24491784	COAD
cg24562819	COAD
cg24619378	COAD
cg24711336	COAD
cg24761542	COAD
cg24765079	COAD
cg24789467	COAD
cg24790419	COAD
cg24803059	COAD
cg24818939	COAD
cg24834436	COAD
cg24847621	COAD
cg24903893	COAD
cg24951263	COAD
cg24969902	COAD
cg24986868	COAD
cg25181684	COAD
cg25232043	COAD
cg25329734	COAD
cg25348105	COAD
cg25412310	COAD
cg25495534	COAD
cg25538342	COAD
cg25539045	COAD
cg25574765	COAD
cg25593794	COAD
cg25599129	COAD
cg25908283	COAD
cg25941151	COAD
cg25957124	COAD
cg25969107	COAD
cg25975856	COAD
cg26003222	COAD
cg26026748	COAD
cg26071016	COAD
cg26111265	COAD
cg26120842	COAD
cg26147947	COAD
cg26251325	COAD
cg26267038	COAD
cg26267430	COAD
cg26280349	COAD
cg26283879	COAD
cg26369418	COAD
cg26373518	COAD
cg26441910	COAD
cg26456435	COAD
cg26464978	COAD
cg26474043	COAD
cg26476156	COAD
cg26549330	COAD
cg26644853	COAD
cg26720913	COAD
cg26741686	COAD
cg26781524	COAD
cg26818786	COAD
cg26879644	COAD
cg26904260	COAD
cg26918987	COAD
cg26922780	COAD
cg26943822	COAD
cg26969888	COAD
cg26991433	COAD
cg27019093	COAD
cg27051318	COAD
cg27107970	COAD
cg27125093	COAD
cg27137955	COAD
cg27144670	COAD
cg27149973	COAD
cg27161395	COAD
cg27175112	COAD
cg27215100	COAD
cg27215236	COAD
cg27296664	COAD
cg27324619	COAD
cg27373845	COAD
cg27409484	COAD
cg27467929	COAD
cg27492103	COAD
cg27553457	COAD
cg27640064	COAD
cg27650171	COAD
cg27651238	COAD
cg27657983	COAD
cg00004996	KIRC
cg00005617	KIRC
cg00024416	KIRC
cg00079023	KIRC
cg00103568	KIRC
cg00122765	KIRC
cg00160667	KIRC
cg00170295	KIRC
cg00174718	KIRC
cg00177142	KIRC
cg00184953	KIRC
cg00202829	KIRC
cg00220243	KIRC
cg00222472	KIRC
cg00253398	KIRC
cg00301239	KIRC
cg00302763	KIRC
cg00328965	KIRC
cg00351119	KIRC
cg00388503	KIRC
cg00417094	KIRC
cg00431336	KIRC
cg00448761	KIRC
cg00471190	KIRC
cg00487989	KIRC
cg00576736	KIRC
cg00593243	KIRC
cg00631221	KIRC
cg00668559	KIRC
cg00686159	KIRC
cg00696323	KIRC
cg00713400	KIRC
cg00722188	KIRC
cg00726147	KIRC
cg00742738	KIRC
cg00755063	KIRC
cg00760014	KIRC
cg00780520	KIRC
[truncated: 10,722 more rows]

## Sheet: sex-shared
CpG	Cancer
cg00069261	LIHC
cg00076313	LIHC
cg00159379	LIHC
cg00318436	LIHC
cg00446003	LIHC
cg00454447	LIHC
cg00459078	LIHC
cg00524374	LIHC
cg00594148	LIHC
cg00702638	LIHC
cg00738178	LIHC
cg00891995	LIHC
cg00981877	LIHC
cg01019355	LIHC
cg01034813	LIHC
cg01115243	LIHC
cg01142668	LIHC
cg01160557	LIHC
cg01263574	LIHC
cg01324115	LIHC
cg01395261	LIHC
cg01449469	LIHC
cg01521060	LIHC
cg01566199	LIHC
cg01569827	LIHC
cg01666550	LIHC
cg01687997	LIHC
cg01698448	LIHC
cg01712700	LIHC
cg01886125	LIHC
cg01950958	LIHC
cg01962750	LIHC
cg01973483	LIHC
cg02072495	LIHC
cg02275396	LIHC
cg02289739	LIHC
cg02319187	LIHC
cg02354658	LIHC
cg02411582	LIHC
cg02464555	LIHC
cg02531277	LIHC
cg02597246	LIHC
cg02709052	LIHC
cg02711479	LIHC
cg02814054	LIHC
cg02835462	LIHC
cg02905828	LIHC
cg02983090	LIHC
cg03138446	LIHC
cg03157150	LIHC
cg03264464	LIHC
cg03497652	LIHC
cg03568041	LIHC
cg03607117	LIHC
cg03610629	LIHC
cg03703733	LIHC
cg03741653	LIHC
cg03858720	LIHC
cg03917020	LIHC
cg03956606	LIHC
cg03983270	LIHC
cg04065151	LIHC
cg04070176	LIHC
cg04073934	LIHC
cg04093208	LIHC
cg04104489	LIHC
cg04153135	LIHC
cg04208175	LIHC
cg04214520	LIHC
cg04242070	LIHC
cg04244985	LIHC
cg04294971	LIHC
cg04387175	LIHC
cg04588969	LIHC
cg04596071	LIHC
cg04703620	LIHC
cg04801430	LIHC
cg04819180	LIHC
cg04875697	LIHC
cg04880546	LIHC
cg04904815	LIHC
cg05053327	LIHC
cg05101437	LIHC
cg05106269	LIHC
cg05128038	LIHC
cg05133853	LIHC
cg05210615	LIHC
cg05210671	LIHC
cg05233094	LIHC
cg05233128	LIHC
cg05238695	LIHC
cg05296180	LIHC
cg05383524	LIHC
cg05463307	LIHC
cg05647756	LIHC
cg05745622	LIHC
cg05777976	LIHC
cg05839570	LIHC
cg05840553	LIHC
cg05919312	LIHC
cg05935052	LIHC
cg05938409	LIHC
cg05946971	LIHC
cg05948372	LIHC
cg06033579	LIHC
cg06055845	LIHC
cg06094085	LIHC
cg06147743	LIHC
cg06186808	LIHC
cg06208834	LIHC
cg06210783	LIHC
cg06270545	LIHC
cg06317805	LIHC
cg06380725	LIHC
cg06389444	LIHC
cg06400255	LIHC
cg06419432	LIHC
cg06419959	LIHC
cg06621784	LIHC
cg06671654	LIHC
cg06672226	LIHC
cg06933824	LIHC
cg06989253	LIHC
cg07031551	LIHC
cg07058027	LIHC
cg07085895	LIHC
cg07086179	LIHC
cg07143815	LIHC
cg07169003	LIHC
cg07181257	LIHC
cg07193511	LIHC
cg07274716	LIHC
cg07418387	LIHC
cg07478098	LIHC
cg07507257	LIHC
cg07539709	LIHC
cg07556730	LIHC
cg07573965	LIHC
cg07601536	LIHC
cg07670266	LIHC
cg07688052	LIHC
cg07698804	LIHC
cg07730183	LIHC
cg07812289	LIHC
cg08085909	LIHC
cg08145949	LIHC
cg08170679	LIHC
cg08269316	LIHC
cg08368094	LIHC
cg08470244	LIHC
cg08608727	LIHC
cg08617970	LIHC
cg08737189	LIHC
cg08781340	LIHC
cg08855504	LIHC
cg08884928	LIHC
cg08900409	LIHC
cg08906442	LIHC
cg08929626	LIHC
cg09121269	LIHC
cg09180239	LIHC
cg09185911	LIHC
cg09249675	LIHC
cg09313745	LIHC
cg09321109	LIHC
cg09329705	LIHC
cg09472004	LIHC
cg09476997	LIHC
cg09548780	LIHC
cg09636715	LIHC
cg09743500	LIHC
cg09845785	LIHC
cg09848693	LIHC
cg10057218	LIHC
cg10078898	LIHC
cg10162914	LIHC
cg10170214	LIHC
cg10299448	LIHC
cg10334928	LIHC
cg10369896	LIHC
cg10389644	LIHC
cg10469791	LIHC
cg10495164	LIHC
cg10505257	LIHC
cg10506715	LIHC
cg10507988	LIHC
cg10541534	LIHC
cg10718056	LIHC
cg11009596	LIHC
cg11024165	LIHC
cg11114313	LIHC
cg11131117	LIHC
cg11155222	LIHC
cg11191040	LIHC
cg11400143	LIHC
cg11401159	LIHC
cg11466131	LIHC
cg11629889	LIHC
cg11650648	LIHC
cg11724984	LIHC
cg11835512	LIHC
cg11841239	LIHC
cg12027899	LIHC
cg12095594	LIHC
cg12151124	LIHC
cg12176793	LIHC
cg12229632	LIHC
cg12271079	LIHC
cg12355887	LIHC
cg12362629	LIHC
cg12371587	LIHC
cg12393104	LIHC
cg12514868	LIHC
cg12516954	LIHC
cg12532001	LIHC
cg12537437	LIHC
cg12581970	LIHC
cg12638776	LIHC
cg12649208	LIHC
cg12912920	LIHC
cg12921171	LIHC
cg13014333	LIHC
cg13053914	LIHC
cg13061124	LIHC
cg13077865	LIHC
cg13100600	LIHC
cg13184448	LIHC
cg13224139	LIHC
cg13231302	LIHC
cg13250285	LIHC
cg13253199	LIHC
cg13293488	LIHC
cg13306921	LIHC
cg13435834	LIHC
cg13481374	LIHC
cg13521941	LIHC
cg13567156	LIHC
cg13651876	LIHC
cg13709634	LIHC
cg13776905	LIHC
cg13814654	LIHC
cg13817395	LIHC
cg13853813	LIHC
cg13892570	LIHC
cg13894813	LIHC
cg13920336	LIHC
cg14015726	LIHC
cg14054357	LIHC
cg14186336	LIHC
cg14204677	LIHC
cg14223485	LIHC
cg14254966	LIHC
cg14516287	LIHC
cg14570632	LIHC
cg14842820	LIHC
cg15002250	LIHC
cg15010544	LIHC
cg15138236	LIHC
cg15285733	LIHC
cg15302350	LIHC
cg15364131	LIHC
cg15410169	LIHC
cg15495091	LIHC
cg15542924	LIHC
cg15577272	LIHC
cg15602548	LIHC
cg15610488	LIHC
cg15644389	LIHC
cg15661389	LIHC
cg16054280	LIHC
cg16205352	LIHC
cg16290534	LIHC
cg16356013	LIHC
cg16550651	LIHC
cg16566899	LIHC
cg16711650	LIHC
cg16719582	LIHC
cg16851771	LIHC
cg16928044	LIHC
cg16988810	LIHC
cg17001958	LIHC
cg17053854	LIHC
cg17183215	LIHC
cg17183362	LIHC
cg17217096	LIHC
cg17278718	LIHC
cg17278960	LIHC
cg17295666	LIHC
cg17311587	LIHC
cg17333242	LIHC
cg17453767	LIHC
cg17504997	LIHC
cg17518550	LIHC
cg17537493	LIHC
cg17578755	LIHC
cg17801765	LIHC
cg17846122	LIHC
cg17846467	LIHC
cg18019810	LIHC
cg18030386	LIHC
cg18047172	LIHC
cg18110520	LIHC
cg18113181	LIHC
cg18195165	LIHC
cg18218112	LIHC
cg18473978	LIHC
cg18595639	LIHC
cg18788664	LIHC
cg18800739	LIHC
cg18801045	LIHC
cg18842353	LIHC
cg19095143	LIHC
cg19265143	LIHC
cg19265913	LIHC
cg19368031	LIHC
cg19497511	LIHC
cg19521693	LIHC
cg19588538	LIHC
cg19718686	LIHC
cg19723715	LIHC
cg19786751	LIHC
cg19787070	LIHC
cg19815813	LIHC
cg19854293	LIHC
cg19897979	LIHC
cg20122492	LIHC
cg20168964	LIHC
cg20208203	LIHC
cg20222695	LIHC
cg20282429	LIHC
cg20543651	LIHC
cg20668546	LIHC
cg20699492	LIHC
cg20703564	LIHC
cg20718434	LIHC
cg20761290	LIHC
cg20782252	LIHC
cg21008808	LIHC
cg21009747	LIHC
cg21072795	LIHC
cg21508713	LIHC
cg21554217	LIHC
cg21617903	LIHC
cg21783599	LIHC
cg21884122	LIHC
cg22193726	LIHC
cg22212560	LIHC
cg22430036	LIHC
cg22498365	LIHC
cg22579950	LIHC
cg22659267	LIHC
cg22816294	LIHC
cg22840650	LIHC
cg22942576	LIHC
cg22955595	LIHC
cg22991936	LIHC
cg23021796	LIHC
cg23131909	LIHC
cg23195547	LIHC
cg23246769	LIHC
cg23551605	LIHC
cg23606421	LIHC
cg23672425	LIHC
cg23683146	LIHC
cg23729763	LIHC
cg23731992	LIHC
cg23807215	LIHC
cg23920246	LIHC
cg24099605	LIHC
cg24232092	LIHC
cg24304264	LIHC
cg24304714	LIHC
cg24361256	LIHC
cg24377133	LIHC
cg24430201	LIHC
cg24475272	LIHC
cg24475275	LIHC
cg24530527	LIHC
cg24640577	LIHC
cg24681499	LIHC
cg24721350	LIHC
cg24740274	LIHC
cg24921221	LIHC
cg24937685	LIHC
cg24938956	LIHC
cg24988159	LIHC
cg25027584	LIHC
cg25149428	LIHC
cg25214561	LIHC
cg25225070	LIHC
cg25350986	LIHC
cg25439632	LIHC
cg25461801	LIHC
cg25504868	LIHC
cg25582353	LIHC
cg25595388	LIHC
cg25598370	LIHC
cg25641145	LIHC
cg25649039	LIHC
cg25702651	LIHC
cg25710107	LIHC
cg25778892	LIHC
cg25792518	LIHC
cg25887619	LIHC
cg25985504	LIHC
cg26055718	LIHC
cg26096338	LIHC
cg26234876	LIHC
cg26361533	LIHC
cg26414000	LIHC
cg26435670	LIHC
cg26437203	LIHC
cg26454350	LIHC
cg26512283	LIHC
cg26690592	LIHC
cg26720452	LIHC
cg26772172	LIHC
cg26775866	LIHC
cg26808293	LIHC
cg26878836	LIHC
cg26894259	LIHC
cg26914705	LIHC
cg26919347	LIHC
cg26987690	LIHC
cg27016272	LIHC
cg27017251	LIHC
cg27080119	LIHC
cg27111150	LIHC
cg27292113	LIHC
cg27292431	LIHC
cg27300045	LIHC
cg27367235	LIHC
cg27444899	LIHC
cg27517823	LIHC
cg27548256	LIHC
cg27573549	LIHC
cg27620946	LIHC
cg00007076	LUAD
cg00012698	LUAD
cg00014998	LUAD
cg00017271	LUAD
cg00026553	LUAD
cg00030420	LUAD
cg00041401	LUAD
cg00043364	LUAD
cg00044505	LUAD
cg00050496	LUAD
cg00066663	LUAD
cg00068750	LUAD
cg00073460	LUAD
cg00084347	LUAD
cg00091064	LUAD
cg00107490	LUAD
cg00109764	LUAD
cg00121884	LUAD
cg00129232	LUAD
cg00135497	LUAD
cg00138407	LUAD
cg00156001	LUAD
cg00160667	LUAD
cg00168191	LUAD
cg00169782	LUAD
cg00174718	LUAD
cg00179906	LUAD
cg00186909	LUAD
cg00201257	LUAD
cg00207226	LUAD
cg00207352	LUAD
cg00217553	LUAD
cg00224911	LUAD
cg00225067	LUAD
cg00233633	LUAD
cg00246969	LUAD
cg00251824	LUAD
cg00287773	LUAD
cg00294025	LUAD
cg00297832	LUAD
cg00298065	LUAD
cg00305585	LUAD
cg00307066	LUAD
cg00332937	LUAD
cg00335591	LUAD
cg00346985	LUAD
cg00348389	LUAD
cg00349404	LUAD
cg00349982	LUAD
cg00351537	LUAD
cg00366850	LUAD
cg00371453	LUAD
cg00373436	LUAD
cg00396667	LUAD
cg00400987	LUAD
cg00404280	LUAD
cg00446123	LUAD
cg00446235	LUAD
cg00448814	LUAD
cg00455327	LUAD
cg00458878	LUAD
cg00460983	LUAD
cg00464927	LUAD
cg00466334	LUAD
cg00470636	LUAD
cg00484122	LUAD
cg00505318	LUAD
cg00516092	LUAD
cg00528616	LUAD
cg00529958	LUAD
cg00530870	LUAD
cg00538381	LUAD
cg00542992	LUAD
cg00546117	LUAD
cg00547530	LUAD
cg00563824	LUAD
cg00575896	LUAD
cg00605763	LUAD
cg00610692	LUAD
cg00615919	LUAD
cg00623111	LUAD
cg00630991	LUAD
cg00632486	LUAD
cg00636527	LUAD
cg00654888	LUAD
cg00664697	LUAD
cg00664730	LUAD
cg00684075	LUAD
cg00706570	LUAD
cg00711496	LUAD
cg00718470	LUAD
cg00720839	LUAD
cg00730077	LUAD
cg00730832	LUAD
cg00735218	LUAD
cg00739667	LUAD
cg00741986	LUAD
cg00754604	LUAD
cg00759807	LUAD
cg00764217	LUAD
cg00766964	LUAD
cg00781795	LUAD
cg00785482	LUAD
cg00799748	LUAD
cg00804803	LUAD
cg00806644	LUAD
cg00806704	LUAD
cg00817377	LUAD
cg00818106	LUAD
cg00820131	LUAD
cg00827893	LUAD
cg00843416	LUAD
cg00849365	LUAD
cg00859858	LUAD
cg00864954	LUAD
cg00865849	LUAD
cg00870166	LUAD
cg00886954	LUAD
cg00891541	LUAD
cg00897799	LUAD
cg00900735	LUAD
cg00916635	LUAD
cg00918944	LUAD
cg00925802	LUAD
cg00937742	LUAD
cg00945209	LUAD
cg00945666	LUAD
cg00952516	LUAD
cg00966482	LUAD
cg00971110	LUAD
cg00979704	LUAD
cg00983904	LUAD
cg00989365	LUAD
cg00995986	LUAD
cg01000615	LUAD
cg01003666	LUAD
cg01004382	LUAD
cg01008263	LUAD
cg01012445	LUAD
cg01016847	LUAD
cg01017926	LUAD
cg01024668	LUAD
cg01026898	LUAD
cg01047586	LUAD
cg01051524	LUAD
cg01056615	LUAD
cg01072388	LUAD
cg01081168	LUAD
cg01081737	LUAD
cg01082057	LUAD
cg01087419	LUAD
cg01101020	LUAD
cg01118868	LUAD
cg01130192	LUAD
cg01135648	LUAD
cg01141438	LUAD
cg01142668	LUAD
cg01143547	LUAD
cg01146614	LUAD
cg01149264	LUAD
cg01150683	LUAD
cg01154283	LUAD
cg01165817	LUAD
cg01167274	LUAD
cg01167556	LUAD
cg01187997	LUAD
cg01213519	LUAD
cg01218206	LUAD
cg01236063	LUAD
cg01243072	LUAD
cg01252713	LUAD
cg01257383	LUAD
cg01258488	LUAD
cg01266985	LUAD
cg01271812	LUAD
cg01272668	LUAD
cg01279413	LUAD
cg01280080	LUAD
cg01282174	LUAD
cg01285926	LUAD
cg01295392	LUAD
cg01295399	LUAD
cg01298102	LUAD
cg01302240	LUAD
cg01304894	LUAD
cg01329690	LUAD
cg01337940	LUAD
cg01352906	LUAD
cg01363284	LUAD
cg01368075	LUAD
cg01377200	LUAD
cg01381846	LUAD
cg01381934	LUAD
cg01399319	LUAD
cg01399485	LUAD
cg01401534	LUAD
cg01409343	LUAD
cg01411786	LUAD
cg01412022	LUAD
cg01415937	LUAD
cg01426713	LUAD
cg01429449	LUAD
cg01439322	LUAD
cg01439753	LUAD
cg01462537	LUAD
cg01465169	LUAD
cg01483824	LUAD
cg01492538	LUAD
cg01494399	LUAD
cg01502872	LUAD
cg01505556	LUAD
cg01511232	LUAD
cg01511901	LUAD
cg01515508	LUAD
cg01518607	LUAD
cg01525669	LUAD
cg01552919	LUAD
cg01561864	LUAD
cg01565703	LUAD
cg01577678	LUAD
cg01582066	LUAD
cg01599709	LUAD
cg01602690	LUAD
cg01636354	LUAD
cg01649584	LUAD
cg01649611	LUAD
cg01679206	LUAD
cg01687862	LUAD
cg01695643	LUAD
cg01695994	LUAD
cg01697487	LUAD
cg01701649	LUAD
cg01709975	LUAD
cg01716252	LUAD
cg01719223	LUAD
cg01719260	LUAD
cg01720920	LUAD
cg01735277	LUAD
cg01746044	LUAD
cg01748082	LUAD
cg01748627	LUAD
cg01759672	LUAD
cg01771737	LUAD
cg01772743	LUAD
cg01778114	LUAD
cg01789499	LUAD
cg01795955	LUAD
cg01796333	LUAD
cg01797704	LUAD
cg01798589	LUAD
cg01801643	LUAD
cg01802532	LUAD
cg01802545	LUAD
cg01806238	LUAD
cg01807748	LUAD
cg01809854	LUAD
cg01813877	LUAD
cg01826354	LUAD
cg01828733	LUAD
cg01850889	LUAD
cg01856384	LUAD
cg01873977	LUAD
cg01876130	LUAD
cg01891252	LUAD
cg01900413	LUAD
cg01901332	LUAD
cg01909856	LUAD
cg01931840	LUAD
cg01935086	LUAD
cg01937809	LUAD
cg01942790	LUAD
cg01943221	LUAD
cg01943585	LUAD
cg01947583	LUAD
cg01962471	LUAD
cg01964337	LUAD
cg01970322	LUAD
cg01973181	LUAD
cg01973483	LUAD
cg01987202	LUAD
cg01991625	LUAD
cg01991934	LUAD
cg02014217	LUAD
cg02022519	LUAD
cg02023728	LUAD
cg02026535	LUAD
cg02034689	LUAD
cg02050917	LUAD
cg02053092	LUAD
cg02053964	LUAD
cg02057782	LUAD
cg02058870	LUAD
cg02059268	LUAD
cg02064267	LUAD
cg02075410	LUAD
cg02082273	LUAD
cg02086820	LUAD
cg02087075	LUAD
cg02090418	LUAD
cg02092616	LUAD
cg02098786	LUAD
cg02102832	LUAD
cg02107844	LUAD
cg02112229	LUAD
cg02114728	LUAD
cg02128308	LUAD
cg02131853	LUAD
cg02142926	LUAD
cg02156723	LUAD
cg02158567	LUAD
cg02165692	LUAD
cg02171905	LUAD
cg02185750	LUAD
cg02201132	LUAD
cg02216727	LUAD
cg02216780	LUAD
cg02229135	LUAD
cg02229757	LUAD
cg02231590	LUAD
cg02244204	LUAD
cg02249390	LUAD
cg02251850	LUAD
cg02258201	LUAD
cg02262727	LUAD
cg02264229	LUAD
cg02291010	LUAD
cg02307239	LUAD
cg02311364	LUAD
cg02330500	LUAD
cg02331025	LUAD
cg02347984	LUAD
cg02352240	LUAD
cg02356223	LUAD
cg02361027	LUAD
cg02362103	LUAD
cg02371376	LUAD
cg02377544	LUAD
cg02384911	LUAD
cg02386822	LUAD
cg02389317	LUAD
cg02397479	LUAD
cg02404349	LUAD
cg02406098	LUAD
cg02409722	LUAD
cg02412684	LUAD
cg02412969	LUAD
cg02422997	LUAD
cg02423817	LUAD
cg02426376	LUAD
cg02430430	LUAD
cg02444695	LUAD
cg02449461	LUAD
cg02452586	LUAD
cg02455346	LUAD
cg02458141	LUAD
cg02470871	LUAD
cg02471028	LUAD
cg02477677	LUAD
cg02479744	LUAD
cg02480199	LUAD
cg02481697	LUAD
cg02486421	LUAD
cg02488942	LUAD
cg02493211	LUAD
cg02504211	LUAD
cg02507181	LUAD
cg02510853	LUAD
cg02512902	LUAD
cg02530321	LUAD
cg02532700	LUAD
cg02544257	LUAD
cg02550308	LUAD
cg02555944	LUAD
cg02574175	LUAD
cg02576915	LUAD
cg02578087	LUAD
cg02578944	LUAD
cg02580005	LUAD
cg02587606	LUAD
cg02596427	LUAD
cg02597246	LUAD
cg02624332	LUAD
cg02627286	LUAD
cg02630233	LUAD
cg02636004	LUAD
cg02637537	LUAD
cg02640104	LUAD
cg02650767	LUAD
cg02652344	LUAD
cg02660643	LUAD
cg02662828	LUAD
cg02688118	LUAD
cg02691192	LUAD
cg02694427	LUAD
cg02697519	LUAD
cg02698668	LUAD
cg02711479	LUAD
cg02725334	LUAD
cg02732915	LUAD
cg02736395	LUAD
cg02740606	LUAD
cg02742969	LUAD
cg02749105	LUAD
cg02767093	LUAD
cg02771117	LUAD
cg02784956	LUAD
cg02787665	LUAD
cg02794779	LUAD
cg02795981	LUAD
cg02802514	LUAD
cg02805890	LUAD
cg02806156	LUAD
cg02813863	LUAD
cg02815014	LUAD
cg02818170	LUAD
cg02821998	LUAD
cg02827029	LUAD
cg02828785	LUAD
cg02829992	LUAD
cg02843158	LUAD
cg02853616	LUAD
cg02856338	LUAD
cg02859319	LUAD
cg02865033	LUAD
cg02874908	LUAD
cg02875879	LUAD
cg02883503	LUAD
cg02886591	LUAD
cg02896970	LUAD
cg02897366	LUAD
cg02909991	LUAD
cg02911077	LUAD
cg02918093	LUAD
cg02920396	LUAD
cg02922776	LUAD
cg02935904	LUAD
cg02938601	LUAD
cg02945385	LUAD
cg02947450	LUAD
cg02954987	LUAD
cg02977575	LUAD
cg02977790	LUAD
cg02988755	LUAD
cg02990598	LUAD
cg02996181	LUAD
cg02996583	LUAD
cg02999781	LUAD
cg03025825	LUAD
cg03029755	LUAD
cg03030317	LUAD
cg03034198	LUAD
cg03035704	LUAD
cg03038245	LUAD
cg03059382	LUAD
cg03072665	LUAD
cg03074126	LUAD
cg03074946	LUAD
cg03078269	LUAD
cg03081173	LUAD
cg03091551	LUAD
cg03103192	LUAD
cg03103944	LUAD
cg03106288	LUAD
cg03126694	LUAD
cg03130910	LUAD
cg03137889	LUAD
cg03143486	LUAD
cg03147185	LUAD
cg03155200	LUAD
cg03156170	LUAD
cg03169557	LUAD
cg03182584	LUAD
cg03186069	LUAD
cg03187073	LUAD
cg03190219	LUAD
cg03192874	LUAD
cg03195795	LUAD
cg03198029	LUAD
cg03199926	LUAD
cg03202693	LUAD
cg03207391	LUAD
cg03207666	LUAD
cg03213374	LUAD
cg03224163	LUAD
cg03233940	LUAD
cg03237166	LUAD
cg03252770	LUAD
cg03254336	LUAD
cg03259887	LUAD
cg03272310	LUAD
cg03280235	LUAD
cg03286774	LUAD
cg03287111	LUAD
cg03290748	LUAD
cg03290827	LUAD
cg03291548	LUAD
cg03295274	LUAD
cg03297901	LUAD
cg03309308	LUAD
cg03312427	LUAD
cg03314644	LUAD
cg03315649	LUAD
cg03332546	LUAD
cg03354554	LUAD
cg03357721	LUAD
cg03362667	LUAD
cg03364683	LUAD
cg03377767	LUAD
cg03380342	LUAD
cg03385114	LUAD
cg03388043	LUAD
cg03402235	LUAD
cg03405909	LUAD
cg03407567	LUAD
cg03408619	LUAD
cg03410115	LUAD
cg03411938	LUAD
cg03413253	LUAD
cg03417182	LUAD
cg03432176	LUAD
cg03433048	LUAD
cg03440386	LUAD
cg03441853	LUAD
cg03443467	LUAD
cg03452625	LUAD
cg03453870	LUAD
cg03456213	LUAD
cg03463948	LUAD
cg03517024	LUAD
cg03520938	LUAD
cg03527086	LUAD
cg03532926	LUAD
cg03534504	LUAD
cg03538383	LUAD
cg03544320	LUAD
cg03548645	LUAD
cg03559915	LUAD
cg03572260	LUAD
cg03585912	LUAD
cg03596635	LUAD
cg03597347	LUAD
cg03598112	LUAD
cg03599078	LUAD
cg03601516	LUAD
cg03610527	LUAD
cg03619332	LUAD
cg03622664	LUAD
cg03625953	LUAD
cg03635766	LUAD
cg03641033	LUAD
cg03649060	LUAD
cg03655701	LUAD
cg03660710	LUAD
cg03663556	LUAD
cg03676298	LUAD
cg03688699	LUAD
cg03697308	LUAD
cg03722525	LUAD
cg03724640	LUAD
cg03724882	LUAD
cg03725573	LUAD
cg03730249	LUAD
cg03730428	LUAD
cg03731131	LUAD
cg03731202	LUAD
cg03731458	LUAD
cg03731828	LUAD
cg03738025	LUAD
cg03740025	LUAD
cg03744842	LUAD
cg03751906	LUAD
cg03762237	LUAD
cg03763518	LUAD
cg03773809	LUAD
cg03776194	LUAD
cg03781262	LUAD
cg03788239	LUAD
cg03791074	LUAD
cg03817667	LUAD
cg03834031	LUAD
cg03846249	LUAD
cg03851835	LUAD
cg03852570	LUAD
cg03855388	LUAD
cg03889450	LUAD
cg03909983	LUAD
cg03916783	LUAD
cg03925294	LUAD
cg03933131	LUAD
cg03935060	LUAD
cg03946762	LUAD
cg03951662	LUAD
cg03956820	LUAD
cg03964958	LUAD
cg03969079	LUAD
cg03970899	LUAD
cg03971454	LUAD
cg03971808	LUAD
cg03983270	LUAD
cg03988533	LUAD
cg03988540	LUAD
cg03998264	LUAD
cg04002220	LUAD
cg04009429	LUAD
cg04026926	LUAD
cg04035828	LUAD
cg04044203	LUAD
cg04063936	LUAD
cg04073934	LUAD
cg04076286	LUAD
cg04081402	LUAD
cg04085768	LUAD
cg04093645	LUAD
cg04100337	LUAD
cg04119529	LUAD
cg04127587	LUAD
cg04133658	LUAD
cg04149500	LUAD
cg04158698	LUAD
cg04165508	LUAD
cg04194947	LUAD
cg04213384	LUAD
cg04227922	LUAD
cg04228709	LUAD
cg04231085	LUAD
cg04240373	LUAD
cg04242070	LUAD
cg04242728	LUAD
cg04244171	LUAD
cg04244970	LUAD
cg04262934	LUAD
cg04270489	LUAD
cg04271289	LUAD
cg04274288	LUAD
cg04275695	LUAD
cg04276058	LUAD
cg04276626	LUAD
cg04279411	LUAD
cg04286194	LUAD
cg04287574	LUAD
cg04291025	LUAD
cg04293602	LUAD
cg04298224	LUAD
cg04305653	LUAD
cg04307107	LUAD
cg04314978	LUAD
cg04347164	LUAD
cg04349084	LUAD
cg04349420	LUAD
cg04350675	LUAD
cg04359418	LUAD
cg04360793	LUAD
cg04370247	LUAD
cg04377850	LUAD
cg04383058	LUAD
cg04383383	LUAD
cg04384031	LUAD
cg04392554	LUAD
cg04414451	LUAD
cg04415176	LUAD
cg04426588	LUAD
cg04447362	LUAD
cg04456219	LUAD
cg04462652	LUAD
cg04467618	LUAD
cg04472001	LUAD
cg04472592	LUAD
cg04472685	LUAD
cg04477010	LUAD
cg04490349	LUAD
cg04503570	LUAD
cg04515608	LUAD
cg04522498	LUAD
cg04539111	LUAD
cg04540406	LUAD
cg04549287	LUAD
cg04563996	LUAD
cg04576707	LUAD
cg04581004	LUAD
cg04608356	LUAD
cg04620946	LUAD
cg04622024	LUAD
cg04623270	LUAD
cg04628181	LUAD
cg04633683	LUAD
cg04650899	LUAD
cg04654288	LUAD
cg04654530	LUAD
cg04655520	LUAD
cg04661929	LUAD
cg04662609	LUAD
cg04681525	LUAD
cg04682977	LUAD
cg04705435	LUAD
cg04706201	LUAD
cg04706229	LUAD
cg04716447	LUAD
cg04720330	LUAD
cg04722215	LUAD
cg04722901	LUAD
cg04723343	LUAD
cg04738965	LUAD
cg04747180	LUAD
cg04751009	LUAD
cg04757492	LUAD
cg04760448	LUAD
cg04762412	LUAD
cg04776231	LUAD
cg04785187	LUAD
cg04786142	LUAD
cg04787317	LUAD
cg04802221	LUAD
cg04815334	LUAD
cg04835811	LUAD
cg04846720	LUAD
cg04857672	LUAD
cg04858834	LUAD
cg04859969	LUAD
cg04864807	LUAD
cg04865220	LUAD
cg04868238	LUAD
cg04875128	LUAD
cg04877966	LUAD
cg04880751	LUAD
cg04892422	LUAD
cg04892643	LUAD
cg04892766	LUAD
cg04904318	LUAD
cg04904784	LUAD
cg04910970	LUAD
cg04912316	LUAD
cg04914996	LUAD
cg04932082	LUAD
cg04944090	LUAD
cg04945753	LUAD
cg04947157	LUAD
cg04955333	LUAD
cg04963480	LUAD
cg04984556	LUAD
cg05004855	LUAD
cg05021029	LUAD
cg05021643	LUAD
cg05029100	LUAD
cg05049448	LUAD
cg05050341	LUAD
cg05053979	LUAD
cg05059480	LUAD
cg05061769	LUAD
cg05066503	LUAD
cg05068866	LUAD
cg05081497	LUAD
cg05091570	LUAD
cg05104447	LUAD
cg05106892	LUAD
cg05112070	LUAD
cg05117638	LUAD
cg05132222	LUAD
cg05138138	LUAD
cg05139788	LUAD
cg05141432	LUAD
cg05143420	LUAD
cg05148385	LUAD
cg05154546	LUAD
cg05157360	LUAD
cg05165862	LUAD
cg05166473	LUAD
cg05168229	LUAD
cg05171197	LUAD
cg05184377	LUAD
cg05190002	LUAD
cg05191839	LUAD
cg05209330	LUAD
cg05210615	LUAD
cg05229649	LUAD
cg05239225	LUAD
cg05251814	LUAD
cg05252161	LUAD
cg05261559	LUAD
cg05277504	LUAD
cg05287372	LUAD
cg05295930	LUAD
cg05299836	LUAD
cg05305099	LUAD
cg05307752	LUAD
cg05314679	LUAD
cg05321275	LUAD
cg05323533	LUAD
cg05324273	LUAD
cg05330497	LUAD
cg05331807	LUAD
cg05333146	LUAD
cg05336982	LUAD
cg05342240	LUAD
cg05343689	LUAD
cg05348708	LUAD
cg05350879	LUAD
cg05354921	LUAD
cg05363382	LUAD
cg05366495	LUAD
cg05371578	LUAD
cg05373863	LUAD
cg05384271	LUAD
cg05385434	LUAD
cg05386769	LUAD
cg05388840	LUAD
cg05389236	LUAD
cg05410198	LUAD
cg05422883	LUAD
cg05436845	LUAD
cg05442717	LUAD
cg05455680	LUAD
cg05457373	LUAD
cg05457684	LUAD
cg05477444	LUAD
cg05482022	LUAD
cg05493356	LUAD
cg05498726	LUAD
cg05501996	LUAD
cg05506600	LUAD
cg05514299	LUAD
cg05514971	LUAD
cg05516004	LUAD
cg05516272	LUAD
cg05516390	LUAD
cg05517233	LUAD
cg05522011	LUAD
cg05543456	LUAD
cg05545808	LUAD
cg05563515	LUAD
cg05570654	LUAD
cg05572417	LUAD
cg05600126	LUAD
cg05606072	LUAD
cg05617798	LUAD
cg05629774	LUAD
cg05631399	LUAD
cg05648510	LUAD
cg05662325	LUAD
cg05673882	LUAD
cg05685297	LUAD
cg05687083	LUAD
cg05696153	LUAD
cg05699921	LUAD
cg05711235	LUAD
cg05716350	LUAD
cg05726109	LUAD
cg05726118	LUAD
cg05727149	LUAD
cg05729490	LUAD
cg05740045	LUAD
cg05740254	LUAD
cg05757530	LUAD
cg05768419	LUAD
cg05771342	LUAD
cg05775862	LUAD
cg05779990	LUAD
cg05787556	LUAD
cg05798501	LUAD
cg05799411	LUAD
cg05804170	LUAD
cg05822633	LUAD
cg05825053	LUAD
cg05845376	LUAD
cg05864433	LUAD
cg05873085	LUAD
cg05874233	LUAD
cg05875463	LUAD
cg05893701	LUAD
cg05898591	LUAD
cg05899103	LUAD
cg05900955	LUAD
cg05902503	LUAD
cg05911082	LUAD
cg05924485	LUAD
cg05927789	LUAD
cg05932042	LUAD
cg05937737	LUAD
cg05938889	LUAD
cg05946118	LUAD
cg05957567	LUAD
cg05958294	LUAD
cg05961294	LUAD
cg05964212	LUAD
cg05973398	LUAD
cg05975710	LUAD
cg05977992	LUAD
cg05982160	LUAD
cg05991401	LUAD
cg06002066	LUAD
cg06005876	LUAD
cg06012215	LUAD
cg06012483	LUAD
cg06024289	LUAD
cg06031268	LUAD
cg06068085	LUAD
cg06068373	LUAD
cg06074958	LUAD
cg06076931	LUAD
cg06081750	LUAD
cg06082906	LUAD
cg06086012	LUAD
cg06092869	LUAD
cg06099244	LUAD
cg06102127	LUAD
cg06103624	LUAD
cg06109482	LUAD
cg06112171	LUAD
cg06117072	LUAD
cg06134471	LUAD
cg06142122	LUAD
cg06148812	LUAD
cg06150195	LUAD
cg06158650	LUAD
cg06173758	LUAD
cg06188545	LUAD
cg06191357	LUAD
cg06200982	LUAD
cg06211255	LUAD
cg06215107	LUAD
cg06215569	LUAD
cg06219206	LUAD
cg06230839	LUAD
cg06236573	LUAD
cg06239526	LUAD
cg06250720	LUAD
cg06252276	LUAD
cg06280210	LUAD
cg06307176	LUAD
cg06335867	LUAD
cg06345789	LUAD
cg06351520	LUAD
cg06365535	LUAD
cg06375148	LUAD
cg06376426	LUAD
cg06381455	LUAD
cg06395232	LUAD
cg06409153	LUAD
cg06422947	LUAD
cg06424065	LUAD
cg06429887	LUAD
cg06439269	LUAD
cg06440348	LUAD
cg06451822	LUAD
cg06458238	LUAD
cg06460883	LUAD
cg06463800	LUAD
cg06469345	LUAD
cg06477444	LUAD
cg06478823	LUAD
cg06485521	LUAD
cg06486088	LUAD
cg06487369	LUAD
cg06495961	LUAD
cg06518233	LUAD
cg06521562	LUAD
cg06522456	LUAD
cg06525280	LUAD
cg06542282	LUAD
cg06544061	LUAD
cg06544111	LUAD
cg06551168	LUAD
cg06552160	LUAD
cg06567596	LUAD
cg06580770	LUAD
cg06585203	LUAD
cg06585307	LUAD
cg06594404	LUAD
cg06607764	LUAD
cg06615154	LUAD
cg06616245	LUAD
cg06626113	LUAD
cg06627532	LUAD
cg06637017	LUAD
cg06640630	LUAD
cg06640822	LUAD
cg06648780	LUAD
cg06651376	LUAD
cg06659209	LUAD
cg06659338	LUAD
cg06663644	LUAD
cg06665333	LUAD
cg06679494	LUAD
cg06689045	LUAD
cg06704466	LUAD
cg06712542	LUAD
cg06736663	LUAD
cg06745704	LUAD
cg06746009	LUAD
cg06752054	LUAD
cg06759993	LUAD
cg06762457	LUAD
cg06764173	LUAD
cg06766541	LUAD
cg06766626	LUAD
cg06769423	LUAD
cg06769820	LUAD
cg06771126	LUAD
cg06779253	LUAD
cg06784602	LUAD
cg06784824	LUAD
cg06800849	LUAD
cg06817454	LUAD
cg06817917	LUAD
cg06819935	LUAD
cg06821075	LUAD
cg06821992	LUAD
cg06821999	LUAD
cg06840491	LUAD
cg06851000	LUAD
cg06853455	LUAD
cg06873880	LUAD
cg06878548	LUAD
cg06885459	LUAD
cg06889086	LUAD
cg06890747	LUAD
cg06903075	LUAD
cg06910100	LUAD
cg06915570	LUAD
cg06918645	LUAD
cg06920324	LUAD
cg06929724	LUAD
cg06934654	LUAD
cg06936290	LUAD
cg06952873	LUAD
cg06953130	LUAD
cg06962177	LUAD
cg06966811	LUAD
cg06970510	LUAD
cg06986158	LUAD
cg06991495	LUAD
cg07004744	LUAD
cg07019315	LUAD
cg07022048	LUAD
cg07038243	LUAD
cg07039560	LUAD
cg07044458	LUAD
cg07059009	LUAD
cg07066163	LUAD
cg07068187	LUAD
cg07068674	LUAD
cg07093324	LUAD
cg07114627	LUAD
cg07119973	LUAD
cg07120889	LUAD
cg07136054	LUAD
cg07138585	LUAD
cg07144297	LUAD
cg07145988	LUAD
cg07155724	LUAD
cg07160746	LUAD
cg07165120	LUAD
cg07165525	LUAD
cg07178825	LUAD
cg07180538	LUAD
cg07180988	LUAD
cg07182248	LUAD
cg07184627	LUAD
cg07188648	LUAD
cg07199337	LUAD
cg07211472	LUAD
cg07212543	LUAD
cg07214164	LUAD
cg07222863	LUAD
cg07223180	LUAD
cg07223648	LUAD
cg07229767	LUAD
cg07244202	LUAD
cg07256668	LUAD
cg07264904	LUAD
cg07267550	LUAD
cg07271264	LUAD
cg07274406	LUAD
cg07274716	LUAD
cg07279070	LUAD
cg07283896	LUAD
cg07284476	LUAD
cg07298473	LUAD
cg07300534	LUAD
cg07307484	LUAD
cg07315493	LUAD
cg07318128	LUAD
cg07318983	LUAD
cg07319375	LUAD
cg07325168	LUAD
cg07326016	LUAD
cg07329360	LUAD
cg07339393	LUAD
cg07340241	LUAD
cg07343511	LUAD
cg07345515	LUAD
cg07345999	LUAD
cg07351192	LUAD
cg07352544	LUAD
cg07355514	LUAD
cg07355926	LUAD
cg07359518	LUAD
cg07366188	LUAD
cg07373723	LUAD
cg07385423	LUAD
cg07385573	LUAD
cg07385778	LUAD
cg07388969	LUAD
cg07435350	LUAD
cg07440826	LUAD
cg07443529	LUAD
cg07450210	LUAD
cg07450633	LUAD
cg07454556	LUAD
cg07459121	LUAD
cg07462448	LUAD
cg07470207	LUAD
cg07479030	LUAD
cg07480446	LUAD
cg07481031	LUAD
cg07484727	LUAD
cg07489048	LUAD
cg07502829	LUAD
cg07506510	LUAD
cg07507218	LUAD
cg07524398	LUAD
cg07533239	LUAD
cg07538946	LUAD
cg07539798	LUAD
cg07545037	LUAD
cg07546078	LUAD
cg07547765	LUAD
cg07551060	LUAD
cg07561747	LUAD
cg07568015	LUAD
cg07575466	LUAD
cg07584855	LUAD
cg07594833	LUAD
cg07595602	LUAD
cg07597386	LUAD
cg07599389	LUAD
cg07604732	LUAD
cg07611000	LUAD
cg07626482	LUAD
cg07632771	LUAD
cg07638500	LUAD
cg07642822	LUAD
cg07649862	LUAD
cg07663765	LUAD
cg07673807	LUAD
cg07679219	LUAD
cg07714812	LUAD
cg07718303	LUAD
cg07719617	LUAD
cg07724304	LUAD
cg07727170	LUAD
cg07736657	LUAD
cg07739369	LUAD
cg07745344	LUAD
cg07760161	LUAD
cg07773434	LUAD
cg07775417	LUAD
cg07783183	LUAD
cg07787771	LUAD
cg07792858	LUAD
cg07796002	LUAD
cg07803375	LUAD
cg07811198	LUAD
cg07816809	LUAD
cg07834574	LUAD
cg07860213	LUAD
cg07864647	LUAD
cg07865607	LUAD
cg07880727	LUAD
cg07883124	LUAD
cg07887168	LUAD
cg07892597	LUAD
cg07893916	LUAD
cg07904452	LUAD
cg07904475	LUAD
cg07915921	LUAD
cg07933234	LUAD
cg07954423	LUAD
cg07959094	LUAD
cg07961632	LUAD
cg07965566	LUAD
cg07966265	LUAD
cg07967632	LUAD
cg07967677	LUAD
cg07973435	LUAD
cg07974511	LUAD
cg07977202	LUAD
cg07987843	LUAD
cg07992484	LUAD
cg07996532	LUAD
cg08001899	LUAD
cg08005122	LUAD
cg08005460	LUAD
cg08006309	LUAD
cg08007925	LUAD
cg08017409	LUAD
cg08032924	LUAD
cg08036172	LUAD
cg08037727	LUAD
cg08039116	LUAD
cg08039560	LUAD
cg08044694	LUAD
cg08048687	LUAD
cg08049853	LUAD
cg08054010	LUAD
cg08059719	LUAD
cg08065963	LUAD
cg08082810	LUAD
cg08087868	LUAD
cg08092105	LUAD
cg08107735	LUAD
cg08118034	LUAD
cg08136772	LUAD
cg08137085	LUAD
cg08139247	LUAD
cg08152445	LUAD
cg08153621	LUAD
cg08155116	LUAD
cg08155625	LUAD
cg08157914	LUAD
cg08172575	LUAD
cg08173709	LUAD
cg08182501	LUAD
cg08188368	LUAD
cg08191854	LUAD
cg08197287	LUAD
cg08198862	LUAD
cg08202226	LUAD
cg08206318	LUAD
cg08207707	LUAD
cg08214329	LUAD
cg08215811	LUAD
cg08216304	LUAD
cg08218799	LUAD
cg08241939	LUAD
cg08244301	LUAD
cg08255481	LUAD
cg08271909	LUAD
cg08273635	LUAD
cg08279097	LUAD
cg08282819	LUAD
cg08284233	LUAD
cg08284876	LUAD
cg08285067	LUAD
cg08288811	LUAD
cg08293531	LUAD
cg08296903	LUAD
cg08300570	LUAD
cg08301307	LUAD
cg08305436	LUAD
cg08305799	LUAD
cg08305942	LUAD
cg08309251	LUAD
cg08309687	LUAD
cg08313880	LUAD
cg08314949	LUAD
cg08328160	LUAD
cg08337633	LUAD
cg08342886	LUAD
cg08358907	LUAD
cg08362273	LUAD
cg08363794	LUAD
cg08383929	LUAD
cg08397758	LUAD
cg08400159	LUAD
cg08404513	LUAD
cg08404702	LUAD
cg08413646	LUAD
cg08419450	LUAD
cg08438529	LUAD
cg08438705	LUAD
cg08443563	LUAD
cg08445039	LUAD
cg08445550	LUAD
cg08445802	LUAD
cg08455275	LUAD
cg08461451	LUAD
cg08461692	LUAD
cg08461949	LUAD
cg08473330	LUAD
cg08491487	LUAD
cg08506869	LUAD
cg08517455	LUAD
cg08521995	LUAD
cg08525922	LUAD
cg08528444	LUAD
cg08537847	LUAD
cg08539991	LUAD
cg08542351	LUAD
cg08544453	LUAD
cg08549335	LUAD
cg08550881	LUAD
cg08564487	LUAD
cg08569678	LUAD
cg08580187	LUAD
cg08584759	LUAD
cg08606497	LUAD
cg08607625	LUAD
cg08610982	LUAD
cg08621441	LUAD
cg08640475	LUAD
cg08642081	LUAD
cg08649068	LUAD
cg08652441	LUAD
cg08653904	LUAD
cg08658787	LUAD
cg08682723	LUAD
cg08686960	LUAD
cg08688659	LUAD
cg08691159	LUAD
cg08698219	LUAD
cg08701183	LUAD
cg08718490	LUAD
cg08722200	LUAD
cg08726667	LUAD
cg08748170	LUAD
cg08749917	LUAD
cg08763102	LUAD
cg08766099	LUAD
cg08776660	LUAD
cg08782899	LUAD
cg08783514	LUAD
cg08786822	LUAD
cg08787791	LUAD
cg08790487	LUAD
cg08807414	LUAD
cg08812889	LUAD
cg08814800	LUAD
cg08844900	LUAD
cg08846327	LUAD
cg08864645	LUAD
cg08866794	LUAD
cg08886154	LUAD
cg08887114	LUAD
cg08898515	LUAD
cg08913523	LUAD
cg08923614	LUAD
cg08928753	LUAD
cg08931404	LUAD
cg08937107	LUAD
cg08937613	LUAD
cg08943107	LUAD
cg08944029	LUAD
cg08945450	LUAD
cg08946575	LUAD
cg08946658	LUAD
cg08957564	LUAD
cg08966950	LUAD
cg08969925	LUAD
cg08979319	LUAD
cg08981537	LUAD
cg08985333	LUAD
cg08993103	LUAD
cg08995609	LUAD
cg09017434	LUAD
cg09029902	LUAD
cg09036188	LUAD
cg09038267	LUAD
cg09040896	LUAD
cg09060789	LUAD
cg09062462	LUAD
cg09063663	LUAD
cg09074113	LUAD
cg09113939	LUAD
cg09117114	LUAD
cg09126279	LUAD
cg09127044	LUAD
cg09141965	LUAD
cg09145391	LUAD
cg09146872	LUAD
cg09148852	LUAD
cg09164726	LUAD
cg09169796	LUAD
cg09197075	LUAD
cg09205595	LUAD
cg09212803	LUAD
cg09216236	LUAD
cg09248714	LUAD
cg09249494	LUAD
cg09255514	LUAD
cg09287629	LUAD
cg09298313	LUAD
cg09307985	LUAD
cg09315172	LUAD
cg09315367	LUAD
cg09317554	LUAD
cg09321403	LUAD
cg09338032	LUAD
cg09338148	LUAD
cg09341491	LUAD
cg09347582	LUAD
cg09361958	LUAD
cg09364501	LUAD
cg09376835	LUAD
cg09390241	LUAD
cg09391066	LUAD
cg09395195	LUAD
cg09395443	LUAD
cg09404516	LUAD
cg09417568	LUAD
cg09422450	LUAD
cg09423283	LUAD
cg09423312	LUAD
cg09436375	LUAD
cg09438837	LUAD
cg09448088	LUAD
cg09451574	LUAD
cg09464206	LUAD
cg09476997	LUAD
cg09479241	LUAD
cg09481537	LUAD
cg09492252	LUAD
cg09506661	LUAD
cg09509144	LUAD
cg09513990	LUAD
cg09520126	LUAD
cg09522056	LUAD
cg09528494	LUAD
cg09533178	LUAD
cg09540676	LUAD
cg09575756	LUAD
cg09579869	LUAD
cg09594291	LUAD
cg09603707	LUAD
cg09621708	LUAD
cg09621958	LUAD
cg09627520	LUAD
cg09628877	LUAD
cg09631769	LUAD
cg09635874	LUAD
cg09639151	LUAD
cg09643312	LUAD
cg09644153	LUAD
cg09645138	LUAD
cg09658183	LUAD
cg09663494	LUAD
cg09672200	LUAD
cg09685096	LUAD
cg09693588	LUAD
cg09709600	LUAD
cg09716921	LUAD
cg09717333	LUAD
cg09719124	LUAD
cg09744840	LUAD
cg09749364	LUAD
cg09753772	LUAD
cg09765089	LUAD
cg09775648	LUAD
cg09797337	LUAD
cg09800500	LUAD
cg09803262	LUAD
cg09803959	LUAD
cg09806671	LUAD
cg09841704	LUAD
cg09848693	LUAD
cg09862950	LUAD
cg09871315	LUAD
cg09878888	LUAD
cg09880291	LUAD
cg09882144	LUAD
cg09887059	LUAD
cg09889350	LUAD
cg09924848	LUAD
cg09934892	LUAD
cg09935667	LUAD
cg09937438	LUAD
cg09941712	LUAD
cg09947611	LUAD
cg09957391	LUAD
cg09962925	LUAD
cg09966895	LUAD
cg09967479	LUAD
cg09977847	LUAD
cg09978533	LUAD
cg09978734	LUAD
cg10011746	LUAD
cg10021364	LUAD
cg10025586	LUAD
cg10026317	LUAD
cg10048215	LUAD
cg10057614	LUAD
cg10060338	LUAD
cg10068408	LUAD
cg10070788	LUAD
cg10078009	LUAD
cg10081811	LUAD
cg10085057	LUAD
cg10089657	LUAD
cg10101680	LUAD
cg10111352	LUAD
cg10125451	LUAD
cg10140240	LUAD
cg10149605	LUAD
cg10156274	LUAD
cg10156302	LUAD
cg10164393	LUAD
cg10167849	LUAD
cg10169070	LUAD
cg10170214	LUAD
cg10172584	LUAD
cg10177394	LUAD
cg10180367	LUAD
cg10189882	LUAD
cg10191399	LUAD
cg10202693	LUAD
cg10202788	LUAD
cg10210594	LUAD
cg10213353	LUAD
cg10227331	LUAD
cg10234693	LUAD
cg10241809	LUAD
cg10255237	LUAD
cg10308629	LUAD
cg10324998	LUAD
cg10330169	LUAD
cg10333400	LUAD
cg10340048	LUAD
cg10343364	LUAD
cg10344477	LUAD
cg10367069	LUAD
cg10371155	LUAD
cg10376838	LUAD
cg10377144	LUAD
cg10380019	LUAD
cg10383447	LUAD
cg10397389	LUAD
cg10399824	LUAD
cg10402698	LUAD
cg10403161	LUAD
cg10406414	LUAD
cg10420161	LUAD
cg10424681	LUAD
cg10424969	LUAD
cg10429508	LUAD
cg10435235	LUAD
cg10449091	LUAD
cg10451566	LUAD
cg10460946	LUAD
cg10466548	LUAD
cg10471113	LUAD
cg10471825	LUAD
cg10472919	LUAD
cg10502231	LUAD
cg10504392	LUAD
cg10512408	LUAD
cg10517990	LUAD
cg10529845	LUAD
cg10530889	LUAD
cg10536898	LUAD
cg10541534	LUAD
cg10542975	LUAD
cg10548399	LUAD
cg10552126	LUAD
cg10553204	LUAD
cg10556005	LUAD
cg10556064	LUAD
cg10573643	LUAD
cg10573932	LUAD
cg10579668	LUAD
cg10580282	LUAD
cg10588310	LUAD
cg10592734	LUAD
cg10600644	LUAD
[truncated: 29,888 more rows]
