# Supplementary material for: Attenuated sex-related DNA methylation differences in cancer highlight the magnitude bias mediating existing disparities
Source: Biol Sex Differ. 2024 Dec 23;15:106. doi: 10.1186/s13293-024-00682-4 (PMC11664931; doi:10.1186/s13293-024-00682-4)
Supplement: Supplementary file 12 — Supplementary material 12. [file 13293_2024_682_MOESM12_ESM.xlsx]

## Sheet: SupplementaryTable11
Cancer	sexEffect	direction	description	qValue	oddsRatio
BLCA	femaleAmplifier	Hypermethylated	opensea	1	0
BLCA	femaleAmplifier	Hypermethylated	shore	1	0
BLCA	femaleAmplifier	Hypermethylated	shelf	1	0
BLCA	femaleAmplifier	Hypermethylated	island	1	0
BLCA	femaleAmplifier	Hypermethylated	1stExon	1	0
BLCA	femaleAmplifier	Hypermethylated	TSS200	1	0
BLCA	femaleAmplifier	Hypermethylated	TSS1500	1	0
BLCA	femaleAmplifier	Hypermethylated	3'UTR	1	0
BLCA	femaleAmplifier	Hypermethylated	5'UTR	1	0
BLCA	femaleAmplifier	Hypermethylated	Body	1	0
BLCA	femaleAmplifier	Hypermethylated	IGR	1	0
BLCA	femaleAmplifier	Hypermethylated	Distal enhancer	1	0
BLCA	femaleAmplifier	Hypermethylated	Insulator	1	0
BLCA	femaleAmplifier	Hypermethylated	Proximal enhancer	1	0
BLCA	femaleAmplifier	Hypermethylated	Promoter	1	0
BLCA	femaleAmplifier	Hypomethylated	opensea	1	0.870005
BLCA	femaleAmplifier	Hypomethylated	shore	0.18836	3.20787
BLCA	femaleAmplifier	Hypomethylated	shelf	1	0
BLCA	femaleAmplifier	Hypomethylated	island	1	0.479373
BLCA	femaleAmplifier	Hypomethylated	Body	1	1.04852
BLCA	femaleAmplifier	Hypomethylated	IGR	0.596964	1.2469
BLCA	femaleAmplifier	Hypomethylated	1stExon	1	1.02737
BLCA	femaleAmplifier	Hypomethylated	TSS200	0.963359	1.08394
BLCA	femaleAmplifier	Hypomethylated	IGR	1	1.15693
BLCA	femaleAmplifier	Hypomethylated	1stExon	1	0
BLCA	femaleAmplifier	Hypomethylated	TSS200	1	0
BLCA	femaleAmplifier	Hypomethylated	TSS1500	1	0.38861
BLCA	maleAmplifier	Hypomethylated	shore	1	0.904618
BLCA	maleAmplifier	Hypomethylated	shelf	0.585969	1.3384
BLCA	maleAmplifier	Hypomethylated	island	1	0.641967
BLCA	maleAmplifier	Hypomethylated	opensea	1	0.791101
BLCA	maleAmplifier	Hypomethylated	shore	0.190184	1.81155
BLCA	maleAmplifier	Hypomethylated	shelf	1	0.294189
BLCA	maleAmplifier	Hypomethylated	island	1	0.942864
BLCA	maleAmplifier	Hypomethylated	opensea	3.68777e-14	2.9216
BLCA	maleAmplifier	Hypomethylated	shore	1	0.574685
BLCA	maleAmplifier	Hypomethylated	shelf	0.775418	1.1016
BLCA	maleAmplifier	Hypomethylated	island	1	0.342367
BLCA	maleAmplifier	Hypomethylated	opensea	3.93191e-40	2.96418
BLCA	maleAmplifier	Hypomethylated	shore	1	0.805172
BLCA	maleAmplifier	Hypomethylated	shelf	0.000220759	1.62459
BLCA	maleAmplifier	Hypomethylated	island	1	0.115989
BLCA	maleAmplifier	Hypomethylated	3'UTR	1	0
BLCA	maleAmplifier	Hypomethylated	5'UTR	0.222292	2.35604
BLCA	maleAmplifier	Hypomethylated	Body	1	0.570336
BLCA	maleAmplifier	Hypomethylated	IGR	1	0.859668
BLCA	maleAmplifier	Hypomethylated	1stExon	1	0.357101
BLCA	maleAmplifier	Hypomethylated	TSS200	1	0.746753
BLCA	maleAmplifier	Hypomethylated	TSS1500	1	0.561221
BLCA	maleAmplifier	Hypomethylated	Insulator	1	0.581123
BLCA	maleAmplifier	Hypomethylated	Proximal enhancer	1	0.713597
BLCA	maleAmplifier	Hypomethylated	Promoter	1	0.562738
BLCA	maleAmplifier	Hypomethylated	Proximal enhancer	1.12591e-07	1.60714
BLCA	maleAmplifier	Hypomethylated	Distal enhancer	2.98995e-07	1.58221
BLCA	maleAmplifier	Hypomethylated	Promoter	0.0270172	1.25346
BLCA	maleAmplifier	Hypomethylated	Insulator	0.99993	0.615032
BLCA	shared	Hypermethylated	opensea	9.67931e-24	1.64376
BLCA	shared	Hypermethylated	shore	0.22892	1.08074
BLCA	shared	Hypermethylated	shelf	1	0.953716
BLCA	shared	Hypermethylated	island	1	0.529061
BLCA	shared	Hypermethylated	opensea	2.21166e-101	2.05144
BLCA	shared	Hypermethylated	shore	0.728994	1.01707
BLCA	shared	Hypermethylated	shelf	5.2163e-14	1.49083
BLCA	shared	Hypomethylated	IGR	1	1.03292
BLCA	shared	Hypomethylated	1stExon	1	0.444322
BLCA	shared	Hypomethylated	TSS200	1	1.09537
BLCA	shared	Hypomethylated	TSS1500	0.313785	1.56252
BLCA	shared	Hypomethylated	3'UTR	1	0
BLCA	shared	Hypomethylated	5'UTR	1	1.01425
BLCA	shared	Hypomethylated	Body	1	0.653214
BLCA	shared	Hypermethylated	Body	1.10084e-10	1.39208
BLCA	shared	Hypermethylated	IGR	1	0.959355
BLCA	shared	Hypermethylated	1stExon	1	0.64806
BLCA	shared	Hypermethylated	TSS200	1	0.795399
BLCA	shared	Hypermethylated	TSS1500	1	0.920321
BLCA	shared	Hypermethylated	3'UTR	0.734251	1.08328
BLCA	shared	Hypermethylated	5'UTR	4.73012e-06	1.30245
BLCA	shared	Hypermethylated	Body	0.0759927	1.08026
BLCA	shared	Hypomethylated	Distal enhancer	2.10272e-175	4.06839
BLCA	shared	Hypomethylated	Insulator	1	0.317024
BLCA	shared	Hypomethylated	Proximal enhancer	1	0.68304
BLCA	shared	Hypomethylated	Promoter	1	0.569255
BLCA	shared	Hypomethylated	Distal enhancer	0	3.91967
BLCA	shared	Hypomethylated	Insulator	1	0.210054
BLCA	shared	Hypomethylated	Proximal enhancer	1	0.747912
BLCA	shared	Hypomethylated	Promoter	1	0.477135
BLCA	shared	Hypomethylated	Distal enhancer	7.74877e-109	2.98409
BLCA	shared	Hypomethylated	Proximal enhancer	0.515298	1.0359
BLCA	shared	Hypomethylated	Promoter	0.99993	0.881311
BLCA	shared	Hypomethylated	Insulator	0.99993	0.104076
COAD	femaleAmplifier	Hypermethylated	opensea	0.00630842	1.59907
COAD	femaleAmplifier	Hypermethylated	shore	0.245409	1.27355
COAD	femaleAmplifier	Hypermethylated	shelf	0.883847	1.06953
COAD	femaleAmplifier	Hypermethylated	island	1	0.398862
COAD	femaleAmplifier	Hypermethylated	1stExon	1	1.04888
COAD	femaleAmplifier	Hypermethylated	TSS200	1	0.79713
COAD	femaleAmplifier	Hypermethylated	TSS1500	1	0.558073
COAD	femaleAmplifier	Hypermethylated	3'UTR	1	1.27853
COAD	femaleAmplifier	Hypermethylated	5'UTR	0.0856012	1.67025
COAD	femaleAmplifier	Hypermethylated	Body	0.105864	1.39232
COAD	femaleAmplifier	Hypermethylated	IGR	1	0.666966
COAD	femaleAmplifier	Hypomethylated	opensea	0.50998	1.14856
COAD	femaleAmplifier	Hypomethylated	shore	0.842652	1.05741
COAD	femaleAmplifier	Hypomethylated	shelf	1	0.297292
COAD	femaleAmplifier	Hypomethylated	island	0.68139	1.09831
COAD	femaleAmplifier	Hypermethylated	Proximal enhancer	1	0.730499
COAD	femaleAmplifier	Hypermethylated	Promoter	1	0.608996
COAD	femaleAmplifier	Hypermethylated	Insulator	1	0
COAD	femaleAmplifier	Hypermethylated	Distal enhancer	0.332555	Inf
COAD	femaleAmplifier	Hypomethylated	5'UTR	0.307505	1.46969
COAD	femaleAmplifier	Hypomethylated	Body	1	0.813589
COAD	femaleAmplifier	Hypomethylated	IGR	0.0518402	1.52262
COAD	femaleAmplifier	Hypomethylated	1stExon	1	0.506371
COAD	femaleAmplifier	Hypomethylated	3'UTR	1	0
COAD	femaleAmplifier	Hypomethylated	5'UTR	1	0
COAD	femaleAmplifier	Hypomethylated	Body	1	1.32724
COAD	femaleAmplifier	Hypomethylated	IGR	1	0.394357
COAD	femaleAmplifier	Hypomethylated	Insulator	0.610944	2.29311
COAD	femaleAmplifier	Hypomethylated	Promoter	0.7755	1.0189
COAD	femaleAmplifier	Hypomethylated	Proximal enhancer	0.99993	0.66749
COAD	femaleAmplifier	Hypomethylated	Distal enhancer	0.180729	2.46828
COAD	maleAmplifier	Hypermethylated	shore	0.518462	1.13334
COAD	maleAmplifier	Hypermethylated	shelf	1	0.725403
COAD	maleAmplifier	Hypermethylated	island	0.37186	1.16295
COAD	maleAmplifier	Hypermethylated	opensea	3.67862e-08	1.7153
COAD	maleAmplifier	Hypermethylated	shore	1	0.903169
COAD	maleAmplifier	Hypermethylated	shelf	0.0196043	1.4683
COAD	maleAmplifier	Hypermethylated	island	1	0.473554
COAD	maleAmplifier	Hypermethylated	Body	0.011071	1.52534
COAD	maleAmplifier	Hypermethylated	IGR	1	1.099
COAD	maleAmplifier	Hypermethylated	1stExon	1	0.809954
COAD	maleAmplifier	Hypermethylated	TSS200	1	0.503518
COAD	maleAmplifier	Hypermethylated	TSS1500	1	0.265939
COAD	maleAmplifier	Hypermethylated	3'UTR	5.0497e-59	3.07877
COAD	maleAmplifier	Hypermethylated	5'UTR	1	0.7532
COAD	maleAmplifier	Hypermethylated	Body	2.85164e-184	2.85583
COAD	maleAmplifier	Hypermethylated	Insulator	1	0.861704
COAD	maleAmplifier	Hypermethylated	Proximal enhancer	1	0.429702
COAD	maleAmplifier	Hypermethylated	Promoter	1	0.261175
COAD	maleAmplifier	Hypermethylated	Distal enhancer	4.84299e-10	2.89307
COAD	maleAmplifier	Hypermethylated	Insulator	1	1.16892
COAD	maleAmplifier	Hypermethylated	Promoter	1	0.264735
COAD	maleAmplifier	Hypermethylated	Proximal enhancer	1	0.325901
COAD	maleAmplifier	Hypomethylated	3'UTR	1	0.566468
COAD	maleAmplifier	Hypomethylated	5'UTR	1	1.07264
COAD	maleAmplifier	Hypomethylated	Body	1	0.614582
COAD	maleAmplifier	Hypomethylated	IGR	3.3914e-09	1.64155
COAD	maleAmplifier	Hypomethylated	1stExon	1	0.5389
COAD	maleAmplifier	Hypomethylated	TSS200	1	0.878759
COAD	maleAmplifier	Hypomethylated	TSS1500	0.222292	1.22474
COAD	shared	Hypomethylated	opensea	1.18562e-246	3.10453
COAD	shared	Hypomethylated	shore	1	0.823963
COAD	shared	Hypomethylated	shelf	7.17476e-09	1.37647
COAD	shared	Hypomethylated	island	1	0.129354
COAD	shared	Hypomethylated	opensea	2.17771e-107	2.7435
COAD	shared	Hypomethylated	shore	1	0.918258
COAD	shared	Hypomethylated	shelf	0.21699	1.11727
COAD	shared	Hypomethylated	IGR	0.00886331	1.22535
COAD	shared	Hypomethylated	1stExon	1	0.620516
COAD	shared	Hypomethylated	TSS200	1	0.537494
COAD	shared	Hypomethylated	TSS1500	1	0.973024
COAD	shared	Hypomethylated	3'UTR	0.671517	1.13944
COAD	shared	Hypomethylated	5'UTR	1	0.895385
COAD	shared	Hypomethylated	Body	5.34277e-15	1.49648
COAD	shared	Hypermethylated	3'UTR	0.041982	2.03328
COAD	shared	Hypermethylated	5'UTR	1	0.742655
COAD	shared	Hypermethylated	Body	4.47717e-18	3.21285
COAD	shared	Hypermethylated	IGR	1	0.552434
COAD	shared	Hypermethylated	Distal enhancer	9.35462e-80	2.33516
COAD	shared	Hypermethylated	Insulator	1	0.33405
COAD	shared	Hypermethylated	Proximal enhancer	1	0.695401
COAD	shared	Hypermethylated	Promoter	1	0.479378
COAD	shared	Hypermethylated	Distal enhancer	1.44047e-47	2.16355
COAD	shared	Hypermethylated	Proximal enhancer	0.0790979	1.12059
COAD	shared	Hypermethylated	Promoter	1	0.873412
COAD	shared	Hypermethylated	Insulator	1	0.355851
COAD	shared	Hypermethylated	Distal enhancer	9.28654e-78	1.99545
COAD	shared	Hypermethylated	Proximal enhancer	0.813753	0.989823
COAD	shared	Hypermethylated	Insulator	1	0.50694
COAD	shared	Hypermethylated	Promoter	1	0.824753
HNSC	femaleAmplifier	Hypermethylated	opensea	2.89015e-08	2.32253
HNSC	femaleAmplifier	Hypermethylated	shore	1	0.659062
HNSC	femaleAmplifier	Hypermethylated	shelf	1	0.967597
HNSC	femaleAmplifier	Hypermethylated	island	1	0.498095
HNSC	femaleAmplifier	Hypermethylated	1stExon	1	0.597648
HNSC	femaleAmplifier	Hypermethylated	TSS200	1	0.199215
HNSC	femaleAmplifier	Hypermethylated	TSS1500	1	0.218224
HNSC	femaleAmplifier	Hypermethylated	3'UTR	0.011071	2.43724
HNSC	femaleAmplifier	Hypermethylated	5'UTR	1	1.06205
HNSC	femaleAmplifier	Hypermethylated	Body	6.61356e-11	2.70963
HNSC	femaleAmplifier	Hypermethylated	IGR	1	0.615236
HNSC	femaleAmplifier	Hypomethylated	opensea	0.000769249	2.00272
HNSC	femaleAmplifier	Hypomethylated	shore	0.122835	1.46568
HNSC	femaleAmplifier	Hypomethylated	shelf	1	0.95947
HNSC	femaleAmplifier	Hypomethylated	island	1	0.209354
HNSC	femaleAmplifier	Hypomethylated	TSS1500	6.14941e-21	2.42499
HNSC	femaleAmplifier	Hypomethylated	3'UTR	1	0.246604
HNSC	femaleAmplifier	Hypomethylated	5'UTR	0.835741	1.11451
HNSC	femaleAmplifier	Hypomethylated	Body	1	0.737262
HNSC	femaleAmplifier	Hypomethylated	3'UTR	1	0
HNSC	femaleAmplifier	Hypomethylated	5'UTR	1	1.40837
HNSC	femaleAmplifier	Hypomethylated	Body	0.97593	1.52895
HNSC	femaleAmplifier	Hypomethylated	IGR	0.563006	2.0659
HNSC	femaleAmplifier	Hypomethylated	Promoter	6.60795e-32	2.85873
HNSC	femaleAmplifier	Hypomethylated	Insulator	1	0.315217
HNSC	femaleAmplifier	Hypomethylated	Distal enhancer	1	0.658088
HNSC	femaleAmplifier	Hypomethylated	Distal enhancer	0.0388197	1.35117
HNSC	maleAmplifier	Hypomethylated	shelf	1	0.550629
HNSC	maleAmplifier	Hypomethylated	island	1	0.608347
HNSC	maleAmplifier	Hypomethylated	opensea	0.113816	1.56254
HNSC	maleAmplifier	Hypomethylated	shore	1	0.782673
HNSC	maleAmplifier	Hypermethylated	shore	1	0.589495
HNSC	maleAmplifier	Hypermethylated	shelf	0.0999928	1.13871
HNSC	maleAmplifier	Hypermethylated	island	1	0.417454
HNSC	maleAmplifier	Hypermethylated	1stExon	1	0.355614
HNSC	maleAmplifier	Hypermethylated	TSS200	1	0.32182
HNSC	maleAmplifier	Hypermethylated	TSS1500	1	0.320976
HNSC	maleAmplifier	Hypermethylated	3'UTR	2.08952e-27	2.50735
HNSC	maleAmplifier	Hypermethylated	1stExon	1	0.971109
HNSC	maleAmplifier	Hypermethylated	TSS200	1	0.988433
HNSC	maleAmplifier	Hypermethylated	TSS1500	1	1.07649
HNSC	maleAmplifier	Hypermethylated	3'UTR	1	0.841857
HNSC	maleAmplifier	Hypermethylated	5'UTR	0.963359	1.05491
HNSC	maleAmplifier	Hypermethylated	Body	2.81358e-45	2.00096
HNSC	maleAmplifier	Hypermethylated	IGR	1	0.71992
HNSC	maleAmplifier	Hypomethylated	3'UTR	1	1.00444
HNSC	maleAmplifier	Hypomethylated	5'UTR	1	0.425525
HNSC	maleAmplifier	Hypomethylated	Body	1	0.983091
HNSC	maleAmplifier	Hypomethylated	IGR	1.48885e-07	2.25191
HNSC	maleAmplifier	Hypomethylated	1stExon	1	0.338172
HNSC	maleAmplifier	Hypomethylated	TSS200	1	0.505464
HNSC	maleAmplifier	Hypomethylated	TSS1500	1	0.698345
HNSC	maleAmplifier	Hypomethylated	Proximal enhancer	4.10844e-05	2.48146
HNSC	maleAmplifier	Hypomethylated	Promoter	4.10844e-05	2.57427
HNSC	maleAmplifier	Hypomethylated	Distal enhancer	1	0.690973
HNSC	maleAmplifier	Hypomethylated	Insulator	1	0
HNSC	maleAmplifier	Hypomethylated	Promoter	0.000924421	1.38031
HNSC	maleAmplifier	Hypomethylated	Distal enhancer	0.00109546	1.32643
HNSC	maleAmplifier	Hypomethylated	Proximal enhancer	0.0059188	1.24114
HNSC	shared	Hypermethylated	island	1	0.257569
HNSC	shared	Hypermethylated	opensea	3.62726e-09	1.49698
HNSC	shared	Hypermethylated	shore	1	0.980792
HNSC	shared	Hypermethylated	shelf	6.34944e-05	1.53224
HNSC	shared	Hypermethylated	island	1	0.494939
HNSC	shared	Hypermethylated	opensea	4.26466e-109	1.87257
HNSC	shared	Hypermethylated	shore	1	0.884127
HNSC	shared	Hypermethylated	shelf	1.8938e-15	1.43133
HNSC	shared	Hypomethylated	IGR	1.95397e-09	1.38378
HNSC	shared	Hypomethylated	1stExon	1	0.724048
HNSC	shared	Hypomethylated	TSS200	1	0.585035
HNSC	shared	Hypomethylated	TSS1500	1	0.68925
HNSC	shared	Hypomethylated	3'UTR	1	0.916455
HNSC	shared	Hypomethylated	5'UTR	0.897696	1.13666
HNSC	shared	Hypomethylated	Body	0.0018907	1.428
HNSC	shared	Hypermethylated	IGR	1	1.01827
HNSC	shared	Hypermethylated	1stExon	1	0.31841
HNSC	shared	Hypermethylated	TSS200	1	0.218618
HNSC	shared	Hypermethylated	TSS1500	1	0.338026
HNSC	shared	Hypomethylated	Distal enhancer	9.54302e-22	2.73917
HNSC	shared	Hypomethylated	Proximal enhancer	0.339142	1.11512
HNSC	shared	Hypomethylated	Insulator	1	0.453382
HNSC	shared	Hypomethylated	Promoter	1	0.765874
HNSC	shared	Hypomethylated	Proximal enhancer	0.00261699	2.082
HNSC	shared	Hypomethylated	Promoter	0.00540042	2.0394
HNSC	shared	Hypomethylated	Distal enhancer	0.0887067	1.47969
HNSC	shared	Hypomethylated	Insulator	1	0
HNSC	shared	Hypomethylated	Distal enhancer	3.33547e-50	2.14535
HNSC	shared	Hypomethylated	Insulator	0.747696	1.09068
HNSC	shared	Hypomethylated	Proximal enhancer	1	0.616702
HNSC	shared	Hypomethylated	Promoter	1	0.50938
KIRC	femaleAmplifier	Hypermethylated	opensea	1.09733e-12	2.32035
KIRC	femaleAmplifier	Hypermethylated	shore	1	0.71018
KIRC	femaleAmplifier	Hypermethylated	shelf	0.177558	1.34279
KIRC	femaleAmplifier	Hypermethylated	island	1	0.369724
KIRC	femaleAmplifier	Hypermethylated	1stExon	1	0.309601
KIRC	femaleAmplifier	Hypermethylated	TSS200	1	0.44082
KIRC	femaleAmplifier	Hypermethylated	TSS1500	1	0.358561
KIRC	femaleAmplifier	Hypermethylated	3'UTR	0.911058	1.254
KIRC	femaleAmplifier	Hypermethylated	5'UTR	1	0.637791
KIRC	femaleAmplifier	Hypermethylated	Body	5.76707e-16	2.61646
KIRC	femaleAmplifier	Hypermethylated	IGR	1	0.848456
KIRC	femaleAmplifier	Hypomethylated	opensea	4.90465e-31	3.03397
KIRC	femaleAmplifier	Hypomethylated	shore	1	0.77366
KIRC	femaleAmplifier	Hypomethylated	shelf	0.153189	1.29183
KIRC	femaleAmplifier	Hypomethylated	island	1	0.176642
KIRC	femaleAmplifier	Hypermethylated	Insulator	1	0
KIRC	femaleAmplifier	Hypermethylated	Promoter	1	0
KIRC	femaleAmplifier	Hypermethylated	Proximal enhancer	1	0
KIRC	femaleAmplifier	Hypermethylated	Distal enhancer	9.52161e-13	2.98104
KIRC	femaleAmplifier	Hypomethylated	TSS200	1	0.363733
KIRC	femaleAmplifier	Hypomethylated	TSS1500	1	0.758385
KIRC	femaleAmplifier	Hypomethylated	3'UTR	0.526096	1.33341
KIRC	femaleAmplifier	Hypomethylated	5'UTR	1	0.982772
KIRC	femaleAmplifier	Hypomethylated	1stExon	1	0
KIRC	femaleAmplifier	Hypomethylated	TSS200	1	0.717431
KIRC	femaleAmplifier	Hypomethylated	TSS1500	1	1.08233
KIRC	femaleAmplifier	Hypomethylated	3'UTR	1	0.97643
KIRC	femaleAmplifier	Hypomethylated	Proximal enhancer	0.193404	2.28232
KIRC	femaleAmplifier	Hypomethylated	Promoter	1	0.537276
KIRC	femaleAmplifier	Hypomethylated	Insulator	1	0
KIRC	femaleAmplifier	Hypomethylated	Promoter	0.00221307	12.5494
KIRC	maleAmplifier	Hypermethylated	opensea	0.16419	1.1617
KIRC	maleAmplifier	Hypermethylated	shore	0.000223533	1.47139
KIRC	maleAmplifier	Hypermethylated	shelf	1	0.647208
KIRC	maleAmplifier	Hypermethylated	island	1	0.672514
KIRC	maleAmplifier	Hypermethylated	opensea	0.842652	1.02686
KIRC	maleAmplifier	Hypermethylated	shore	0.223497	1.15722
KIRC	maleAmplifier	Hypermethylated	shelf	1	0.94174
KIRC	maleAmplifier	Hypermethylated	TSS1500	1	0.476903
KIRC	maleAmplifier	Hypermethylated	3'UTR	0.0150759	2.21748
KIRC	maleAmplifier	Hypermethylated	5'UTR	1	0.799342
KIRC	maleAmplifier	Hypermethylated	Body	0.00167414	1.60609
KIRC	maleAmplifier	Hypermethylated	IGR	1	0.590246
KIRC	maleAmplifier	Hypermethylated	1stExon	1	0.227709
KIRC	maleAmplifier	Hypermethylated	TSS200	1	0.0456273
KIRC	maleAmplifier	Hypermethylated	TSS1500	1	0.138733
KIRC	maleAmplifier	Hypermethylated	Distal enhancer	4.61062e-38	1.97971
KIRC	maleAmplifier	Hypermethylated	Proximal enhancer	1	0.872319
KIRC	maleAmplifier	Hypermethylated	Insulator	1	0.229228
KIRC	maleAmplifier	Hypermethylated	Promoter	1	0.511287
KIRC	maleAmplifier	Hypomethylated	1stExon	1	1.12762
KIRC	maleAmplifier	Hypomethylated	TSS200	1	0.557594
KIRC	maleAmplifier	Hypomethylated	TSS1500	1	0.687183
KIRC	maleAmplifier	Hypomethylated	3'UTR	1	0.726435
KIRC	maleAmplifier	Hypomethylated	5'UTR	1	0.767284
KIRC	maleAmplifier	Hypomethylated	Body	1	0.660564
KIRC	maleAmplifier	Hypomethylated	IGR	7.27561e-10	1.84713
KIRC	maleAmplifier	Hypomethylated	Distal enhancer	0.0987221	1.35269
KIRC	maleAmplifier	Hypomethylated	Promoter	0.914917	0.927542
KIRC	maleAmplifier	Hypomethylated	Proximal enhancer	1	0.822434
KIRC	shared	Hypomethylated	island	1	0.203587
KIRC	shared	Hypomethylated	opensea	1.68916e-17	2.37278
KIRC	shared	Hypomethylated	shore	0.434807	1.11752
KIRC	shared	Hypomethylated	shelf	0.57853	1.12821
KIRC	shared	Hypomethylated	island	1	0.18592
KIRC	shared	Hypomethylated	opensea	0.50998	1.22569
KIRC	shared	Hypomethylated	shore	0.245409	1.41371
KIRC	shared	Hypomethylated	IGR	1	0.909062
KIRC	shared	Hypomethylated	1stExon	1	0.432634
KIRC	shared	Hypomethylated	TSS200	1	0.268369
KIRC	shared	Hypomethylated	TSS1500	1	0.501271
KIRC	shared	Hypomethylated	3'UTR	1	0.892807
KIRC	shared	Hypomethylated	5'UTR	1	0.801269
KIRC	shared	Hypomethylated	Body	0.000470489	1.20616
KIRC	shared	Hypermethylated	1stExon	1	0.614664
KIRC	shared	Hypermethylated	TSS200	1	0.339693
KIRC	shared	Hypermethylated	TSS1500	1	0.485251
KIRC	shared	Hypermethylated	3'UTR	0.0138254	1.33336
KIRC	shared	Hypermethylated	Distal enhancer	1.14936e-51	2.8221
KIRC	shared	Hypermethylated	Insulator	1	0.593979
KIRC	shared	Hypermethylated	Proximal enhancer	1	0.59448
KIRC	shared	Hypermethylated	Promoter	1	0.390742
KIRC	shared	Hypermethylated	Distal enhancer	6.72063e-212	2.5862
KIRC	shared	Hypermethylated	Insulator	1	0.834325
KIRC	shared	Hypermethylated	Proximal enhancer	1	0.543964
KIRC	shared	Hypermethylated	Promoter	1	0.323233
KIRC	shared	Hypermethylated	Distal enhancer	5.80263e-21	3.99882
KIRC	shared	Hypermethylated	Promoter	1	0.241196
KIRC	shared	Hypermethylated	Proximal enhancer	1	0.32773
KIRC	shared	Hypermethylated	Insulator	1	0
KIRP	femaleAmplifier	Hypermethylated	opensea	4.3716e-05	1.7849
KIRP	femaleAmplifier	Hypermethylated	shore	1	0.854759
KIRP	femaleAmplifier	Hypermethylated	shelf	1	0.773498
KIRP	femaleAmplifier	Hypermethylated	island	1	0.631813
KIRP	femaleAmplifier	Hypermethylated	1stExon	1	0.665982
KIRP	femaleAmplifier	Hypermethylated	TSS200	1	0.339092
KIRP	femaleAmplifier	Hypermethylated	TSS1500	1	0.634827
KIRP	femaleAmplifier	Hypermethylated	3'UTR	1	1.18554
KIRP	femaleAmplifier	Hypermethylated	5'UTR	1	0.766265
KIRP	femaleAmplifier	Hypermethylated	Body	3.07183e-05	1.83273
KIRP	femaleAmplifier	Hypermethylated	IGR	1	1.03545
KIRP	femaleAmplifier	Hypomethylated	opensea	0.24677	1.37606
KIRP	femaleAmplifier	Hypomethylated	shore	0.142865	1.5372
KIRP	femaleAmplifier	Hypomethylated	shelf	0.0333065	2.15715
KIRP	femaleAmplifier	Hypomethylated	island	1	0.183583
KIRP	femaleAmplifier	Hypermethylated	Proximal enhancer	1	0.524432
KIRP	femaleAmplifier	Hypermethylated	Promoter	1	0.420643
KIRP	femaleAmplifier	Hypermethylated	Insulator	1	0
KIRP	femaleAmplifier	Hypomethylated	1stExon	1	0.379028
KIRP	femaleAmplifier	Hypomethylated	Body	0.00199892	1.40072
KIRP	femaleAmplifier	Hypomethylated	IGR	0.170046	1.22413
KIRP	femaleAmplifier	Hypomethylated	1stExon	1	0.460952
KIRP	femaleAmplifier	Hypomethylated	TSS200	1	0.28265
KIRP	femaleAmplifier	Hypomethylated	5'UTR	1	1.03461
KIRP	femaleAmplifier	Hypomethylated	Body	0.835741	1.18419
KIRP	femaleAmplifier	Hypomethylated	IGR	0.936718	1.18071
KIRP	femaleAmplifier	Hypomethylated	Distal enhancer	9.78264e-05	2.07014
KIRP	femaleAmplifier	Hypomethylated	Proximal enhancer	0.155209	2.73537
KIRP	femaleAmplifier	Hypomethylated	Insulator	1	0
KIRP	femaleAmplifier	Hypomethylated	Distal enhancer	1	0
KIRP	femaleAmplifier	Hypomethylated	Distal enhancer	0.000190259	2.20816
KIRP	maleAmplifier	Hypermethylated	island	1	0.876569
KIRP	maleAmplifier	Hypermethylated	opensea	1.71663e-93	2.10409
KIRP	maleAmplifier	Hypermethylated	shore	1	0.806695
KIRP	maleAmplifier	Hypermethylated	shelf	4.42659e-32	1.88047
KIRP	maleAmplifier	Hypermethylated	island	1	0.277803
KIRP	maleAmplifier	Hypermethylated	opensea	0.00256351	1.67385
KIRP	maleAmplifier	Hypermethylated	shore	1	0.709348
KIRP	maleAmplifier	Hypermethylated	IGR	1	0.997057
KIRP	maleAmplifier	Hypermethylated	1stExon	1	0.722092
KIRP	maleAmplifier	Hypermethylated	TSS200	1	0.33852
KIRP	maleAmplifier	Hypermethylated	TSS1500	1	0.860218
KIRP	maleAmplifier	Hypermethylated	3'UTR	1	0.467067
KIRP	maleAmplifier	Hypermethylated	5'UTR	1	0.234641
KIRP	maleAmplifier	Hypermethylated	Body	1.82971e-33	7.70127
KIRP	maleAmplifier	Hypermethylated	IGR	1	0.478711
KIRP	maleAmplifier	Hypomethylated	3'UTR	1	0.876033
KIRP	maleAmplifier	Hypomethylated	5'UTR	0.670873	1.28559
KIRP	maleAmplifier	Hypomethylated	Body	1	1.05682
KIRP	maleAmplifier	Hypomethylated	IGR	0.274706	1.31575
KIRP	maleAmplifier	Hypomethylated	1stExon	1	0.244044
KIRP	maleAmplifier	Hypomethylated	TSS200	1	0.995521
KIRP	maleAmplifier	Hypomethylated	TSS1500	1	1.08141
KIRP	maleAmplifier	Hypomethylated	Insulator	1	0
KIRP	maleAmplifier	Hypomethylated	Distal enhancer	0.00859065	1.94322
KIRP	maleAmplifier	Hypomethylated	Promoter	0.528997	1.22104
KIRP	maleAmplifier	Hypomethylated	Proximal enhancer	0.823247	1.04002
KIRP	maleAmplifier	Hypomethylated	Insulator	1	0
KIRP	maleAmplifier	Hypomethylated	Promoter	0.0732067	2.1825
KIRP	maleAmplifier	Hypomethylated	Proximal enhancer	0.613599	1.33836
KIRP	shared	Hypomethylated	shelf	1	0.371886
KIRP	shared	Hypomethylated	island	1	0.754375
KIRP	shared	Hypomethylated	opensea	1.57917e-140	3.37739
KIRP	shared	Hypomethylated	shore	1	0.840658
KIRP	shared	Hypomethylated	shelf	0.00564345	1.26559
KIRP	shared	Hypomethylated	island	1	0.105179
KIRP	shared	Hypermethylated	opensea	1.02183e-05	1.8438
KIRP	shared	Hypomethylated	IGR	8.62138e-49	2.09359
KIRP	shared	Hypomethylated	1stExon	1	0.315216
KIRP	shared	Hypomethylated	TSS200	1	0.291263
KIRP	shared	Hypomethylated	TSS1500	1	0.490956
KIRP	shared	Hypomethylated	3'UTR	1	0.936136
KIRP	shared	Hypomethylated	5'UTR	0.00139762	1.21776
KIRP	shared	Hypomethylated	Body	9.90027e-31	1.49334
KIRP	shared	Hypermethylated	5'UTR	1	0.824457
KIRP	shared	Hypermethylated	Body	4.66472e-51	1.86263
KIRP	shared	Hypermethylated	IGR	0.0974383	1.10547
KIRP	shared	Hypermethylated	1stExon	1	0.679565
KIRP	shared	Hypermethylated	3'UTR	0.0776891	4.75845
KIRP	shared	Hypermethylated	5'UTR	1	0.375448
KIRP	shared	Hypermethylated	Body	0.0107916	3.38486
KIRP	shared	Hypermethylated	IGR	1	0
KIRP	shared	Hypermethylated	Distal enhancer	0.0737661	2.46609
KIRP	shared	Hypermethylated	Promoter	1	0.467671
KIRP	shared	Hypermethylated	Proximal enhancer	1	0.285422
KIRP	shared	Hypermethylated	Insulator	1	0
KIRP	shared	Hypermethylated	Distal enhancer	1.03282e-167	2.60985
KIRP	shared	Hypermethylated	Proximal enhancer	1	0.867108
KIRP	shared	Hypermethylated	Insulator	1	0.252822
KIRP	shared	Hypermethylated	Promoter	1	0.588628
LIHC	femaleAmplifier	Hypermethylated	opensea	0.121199	1.55958
LIHC	femaleAmplifier	Hypermethylated	shore	1	0.940693
LIHC	femaleAmplifier	Hypermethylated	shelf	0.061066	2.09063
LIHC	femaleAmplifier	Hypermethylated	island	1	0.375981
LIHC	femaleAmplifier	Hypermethylated	1stExon	1	0.505441
LIHC	femaleAmplifier	Hypermethylated	TSS200	1	0.318144
LIHC	femaleAmplifier	Hypermethylated	TSS1500	1	0.244808
LIHC	femaleAmplifier	Hypermethylated	3'UTR	0.0096563	3.68515
LIHC	femaleAmplifier	Hypermethylated	5'UTR	1	0.556252
LIHC	femaleAmplifier	Hypermethylated	Body	0.000592176	2.48978
LIHC	femaleAmplifier	Hypermethylated	IGR	1	0.669782
LIHC	femaleAmplifier	Hypermethylated	Distal enhancer	0.0140687	2.00014
LIHC	femaleAmplifier	Hypermethylated	Proximal enhancer	1	0.416976
LIHC	femaleAmplifier	Hypermethylated	Promoter	1	0.280011
LIHC	femaleAmplifier	Hypermethylated	Insulator	1	0
LIHC	femaleAmplifier	Hypomethylated	opensea	0.000334433	1.90695
LIHC	femaleAmplifier	Hypomethylated	shore	0.318927	1.25989
LIHC	femaleAmplifier	Hypomethylated	shelf	1	0.640763
LIHC	femaleAmplifier	Hypomethylated	island	1	0.397905
LIHC	femaleAmplifier	Hypermethylated	Proximal enhancer	0.498238	1.31031
LIHC	femaleAmplifier	Hypermethylated	Promoter	1	0.819772
LIHC	femaleAmplifier	Hypermethylated	Insulator	1	0
LIHC	femaleAmplifier	Hypermethylated	Distal enhancer	0.0435708	1.43069
LIHC	femaleAmplifier	Hypomethylated	IGR	1	0.602202
LIHC	femaleAmplifier	Hypomethylated	1stExon	1	0.553103
LIHC	femaleAmplifier	Hypomethylated	TSS200	1	0.455582
LIHC	femaleAmplifier	Hypomethylated	TSS1500	1	0.975863
LIHC	femaleAmplifier	Hypomethylated	Proximal enhancer	1	0.976619
LIHC	femaleAmplifier	Hypomethylated	Promoter	1	0.916145
LIHC	femaleAmplifier	Hypomethylated	Insulator	1	0
LIHC	femaleAmplifier	Hypomethylated	Distal enhancer	0.0012851	1.76957
LIHC	maleAmplifier	Hypomethylated	opensea	1.04829e-09	1.67479
LIHC	maleAmplifier	Hypomethylated	shore	0.0188236	1.26962
LIHC	maleAmplifier	Hypomethylated	shelf	0.548315	1.1103
LIHC	maleAmplifier	Hypomethylated	island	1	0.365427
LIHC	maleAmplifier	Hypomethylated	opensea	0.728994	1.11092
LIHC	maleAmplifier	Hypomethylated	shore	0.00306827	1.98624
LIHC	maleAmplifier	Hypomethylated	shelf	1	0.287745
LIHC	maleAmplifier	Hypermethylated	5'UTR	1	0.820372
LIHC	maleAmplifier	Hypermethylated	Body	4.14066e-119	2.58682
LIHC	maleAmplifier	Hypermethylated	IGR	1	0.685113
LIHC	maleAmplifier	Hypermethylated	Distal enhancer	8.59475e-140	3.03138
LIHC	maleAmplifier	Hypermethylated	5'UTR	0.139372	1.3229
LIHC	maleAmplifier	Hypermethylated	Body	1	0.835934
LIHC	maleAmplifier	Hypermethylated	IGR	0.992755	1.06705
LIHC	maleAmplifier	Hypermethylated	1stExon	1	0.524191
LIHC	maleAmplifier	Hypermethylated	Distal enhancer	5.66584e-05	1.90755
LIHC	maleAmplifier	Hypermethylated	Proximal enhancer	1	0.882735
LIHC	maleAmplifier	Hypermethylated	Promoter	1	0.440076
LIHC	maleAmplifier	Hypermethylated	Insulator	1	0
LIHC	maleAmplifier	Hypermethylated	Distal enhancer	0.00130515	1.64263
LIHC	maleAmplifier	Hypermethylated	Proximal enhancer	1	0.769199
LIHC	maleAmplifier	Hypermethylated	Promoter	1	0.70744
LIHC	maleAmplifier	Hypomethylated	3'UTR	0.968201	1.15091
LIHC	maleAmplifier	Hypomethylated	5'UTR	0.963359	1.09532
LIHC	maleAmplifier	Hypomethylated	Body	0.0548729	1.21951
LIHC	maleAmplifier	Hypomethylated	IGR	0.000510344	1.42321
LIHC	maleAmplifier	Hypomethylated	1stExon	1	0.495352
LIHC	maleAmplifier	Hypomethylated	TSS200	1	0.930054
LIHC	maleAmplifier	Hypomethylated	TSS1500	0.553109	1.1395
LIHC	maleAmplifier	Hypomethylated	Insulator	0.0422641	2.20535
LIHC	maleAmplifier	Hypomethylated	Distal enhancer	0.000104904	1.47675
LIHC	maleAmplifier	Hypomethylated	Promoter	0.237798	1.16424
LIHC	maleAmplifier	Hypomethylated	Insulator	0.819335	1.04817
LIHC	maleAmplifier	Hypomethylated	Proximal enhancer	1	0.878676
LIHC	shared	Hypomethylated	opensea	0.00496185	1.58084
LIHC	shared	Hypomethylated	shore	0.00220033	1.69368
LIHC	shared	Hypermethylated	island	1	0.408099
LIHC	shared	Hypermethylated	opensea	1.60467e-06	2.02977
LIHC	shared	Hypermethylated	shore	1	0.759146
LIHC	shared	Hypermethylated	shelf	1	0.806931
LIHC	shared	Hypermethylated	island	1	0.570249
LIHC	shared	Hypermethylated	opensea	0.68139	1.01715
LIHC	shared	Hypermethylated	shore	1	0.8714
LIHC	shared	Hypomethylated	IGR	0.313785	1.47904
LIHC	shared	Hypomethylated	1stExon	1	0.349896
LIHC	shared	Hypomethylated	TSS200	1	0.4861
LIHC	shared	Hypomethylated	TSS1500	1	0.979545
LIHC	shared	Hypermethylated	3'UTR	1.50047e-06	2.04873
LIHC	shared	Hypermethylated	5'UTR	1	0.694379
LIHC	shared	Hypermethylated	Body	3.50659e-69	3.18934
LIHC	shared	Hypermethylated	IGR	1	0.597952
LIHC	shared	Hypermethylated	1stExon	1	0.278413
LIHC	shared	Hypermethylated	TSS200	1	0.226421
LIHC	shared	Hypermethylated	TSS1500	1	0.337463
LIHC	shared	Hypermethylated	3'UTR	2.40501e-39	2.19647
LIHC	shared	Hypermethylated	5'UTR	1	0.87715
LIHC	shared	Hypermethylated	Body	0	3.06603
LIHC	shared	Hypermethylated	IGR	1	0.561961
LIHC	shared	Hypermethylated	1stExon	1	0.472109
LUAD	femaleAmplifier	Hypermethylated	opensea	1.67502e-61	5.37648
LUAD	femaleAmplifier	Hypermethylated	shore	1	0.433891
LUAD	femaleAmplifier	Hypermethylated	shelf	0.699703	1.09184
LUAD	femaleAmplifier	Hypermethylated	island	1	0.110317
LUAD	femaleAmplifier	Hypermethylated	1stExon	1	0.217522
LUAD	femaleAmplifier	Hypermethylated	TSS200	1	0.270967
LUAD	femaleAmplifier	Hypermethylated	TSS1500	1	0.453637
LUAD	femaleAmplifier	Hypermethylated	3'UTR	0.00323828	2.03765
LUAD	femaleAmplifier	Hypermethylated	5'UTR	1	0.813666
LUAD	femaleAmplifier	Hypermethylated	Body	9.46271e-14	2.12554
LUAD	femaleAmplifier	Hypermethylated	IGR	1	0.975981
LUAD	femaleAmplifier	Hypermethylated	Distal enhancer	1.06719e-19	2.52501
LUAD	femaleAmplifier	Hypermethylated	Insulator	1	0.429723
LUAD	femaleAmplifier	Hypermethylated	Promoter	1	0.375859
LUAD	femaleAmplifier	Hypermethylated	Proximal enhancer	1	0.421132
LUAD	femaleAmplifier	Hypomethylated	opensea	1	0.491588
LUAD	femaleAmplifier	Hypomethylated	shore	1.53319e-30	2.57078
LUAD	femaleAmplifier	Hypomethylated	shelf	1	0.296088
LUAD	femaleAmplifier	Hypomethylated	island	1	0.964532
LUAD	femaleAmplifier	Hypermethylated	Proximal enhancer	0.0522304	1.39082
LUAD	femaleAmplifier	Hypermethylated	Insulator	0.395047	2.21841
LUAD	femaleAmplifier	Hypermethylated	Promoter	0.740165	1.01807
LUAD	femaleAmplifier	Hypermethylated	Distal enhancer	2.59339e-15	2.63012
LUAD	femaleAmplifier	Hypomethylated	3'UTR	0.00877239	2.15316
LUAD	femaleAmplifier	Hypomethylated	5'UTR	1	0.94447
LUAD	femaleAmplifier	Hypomethylated	Body	3.43801e-08	1.97156
LUAD	femaleAmplifier	Hypomethylated	IGR	1	0.444981
LUAD	femaleAmplifier	Hypomethylated	Proximal enhancer	0.398795	1.21984
LUAD	femaleAmplifier	Hypomethylated	Promoter	0.442318	1.20017
LUAD	femaleAmplifier	Hypomethylated	Insulator	1	0
LUAD	femaleAmplifier	Hypomethylated	Distal enhancer	1.44846e-16	2.2751
LUAD	maleAmplifier	Hypomethylated	island	1	0.586558
LUAD	maleAmplifier	Hypomethylated	opensea	5.34549e-11	1.6407
LUAD	maleAmplifier	Hypomethylated	shore	3.84831e-14	1.82003
LUAD	maleAmplifier	Hypomethylated	shelf	0.0875128	1.26238
LUAD	maleAmplifier	Hypomethylated	island	1	0.16909
LUAD	maleAmplifier	Hypomethylated	opensea	4.7517e-18	2.1709
LUAD	maleAmplifier	Hypomethylated	shore	0.891155	1.01934
LUAD	maleAmplifier	Hypermethylated	Insulator	1	0.331841
LUAD	maleAmplifier	Hypermethylated	Proximal enhancer	1	0.549695
LUAD	maleAmplifier	Hypermethylated	Promoter	1	0.427554
LUAD	maleAmplifier	Hypermethylated	1stExon	1	0.730605
LUAD	maleAmplifier	Hypermethylated	TSS200	1	0.241868
LUAD	maleAmplifier	Hypermethylated	TSS1500	1	0.775864
LUAD	maleAmplifier	Hypermethylated	3'UTR	0.033151	1.68762
LUAD	maleAmplifier	Hypermethylated	5'UTR	1	0.928758
LUAD	maleAmplifier	Hypermethylated	Insulator	1	0
LUAD	maleAmplifier	Hypermethylated	Distal enhancer	5.87564e-17	2.29384
LUAD	maleAmplifier	Hypermethylated	Proximal enhancer	1	0.817204
LUAD	maleAmplifier	Hypermethylated	Promoter	1	0.440217
LUAD	maleAmplifier	Hypermethylated	Insulator	1	0
LUAD	maleAmplifier	Hypermethylated	Proximal enhancer	5.33398e-07	1.65041
LUAD	maleAmplifier	Hypermethylated	Distal enhancer	0.000113825	1.48438
LUAD	maleAmplifier	Hypomethylated	3'UTR	1	0.476648
LUAD	maleAmplifier	Hypomethylated	5'UTR	0.71169	1.13896
LUAD	maleAmplifier	Hypomethylated	Body	1	0.754995
LUAD	maleAmplifier	Hypomethylated	IGR	1.52539e-05	1.52501
LUAD	maleAmplifier	Hypomethylated	1stExon	0.615853	1.59711
LUAD	maleAmplifier	Hypomethylated	TSS200	1	1.00785
LUAD	maleAmplifier	Hypomethylated	TSS1500	0.14945	1.6353
LUAD	shared	Hypomethylated	shelf	1	0.775223
LUAD	shared	Hypomethylated	island	1	0.319035
LUAD	shared	Hypomethylated	opensea	3.02467e-31	1.98399
LUAD	shared	Hypomethylated	shore	0.0325232	1.17176
LUAD	shared	Hypomethylated	shelf	0.149294	1.17666
LUAD	shared	Hypomethylated	island	1	0.290966
LUAD	shared	Hypomethylated	opensea	4.56289e-35	1.85792
LUAD	shared	Hypermethylated	shelf	0.40314	1.05465
LUAD	shared	Hypomethylated	1stExon	1	0.388308
LUAD	shared	Hypomethylated	TSS200	1	0.548347
LUAD	shared	Hypomethylated	TSS1500	1	0.829534
LUAD	shared	Hypomethylated	3'UTR	1	1.16194
LUAD	shared	Hypomethylated	5'UTR	1	1.07213
LUAD	shared	Hypomethylated	Body	0.00163784	1.69312
LUAD	shared	Hypomethylated	3'UTR	1	0.648484
LUAD	shared	Hypomethylated	5'UTR	1	0.807975
LUAD	shared	Hypomethylated	Body	1	0.876095
LUAD	shared	Hypomethylated	IGR	1.01776e-44	2.07063
LUAD	shared	Hypermethylated	TSS200	1	0.0750623
LUAD	shared	Hypermethylated	TSS1500	1	0.260897
LUAD	shared	Hypermethylated	3'UTR	0.631349	1.45507
LUAD	shared	Hypermethylated	5'UTR	1	0.597359
LUAD	shared	Hypermethylated	Body	4.03292e-17	3.39773
LUAD	shared	Hypermethylated	IGR	1	0.76055
LUAD	shared	Hypermethylated	1stExon	1	0.693098
LUAD	shared	Hypermethylated	TSS200	1	0.476409
LUAD	shared	Hypermethylated	TSS1500	1	0.487716
LUAD	shared	Hypermethylated	3'UTR	5.92711e-09	1.55786
LUAD	shared	Hypermethylated	5'UTR	1	1.00689
LUAD	shared	Hypermethylated	Body	3.92583e-20	1.34759
LUSC	femaleAmplifier	Hypermethylated	opensea	0.0188236	2.05714
LUSC	femaleAmplifier	Hypermethylated	shore	0.332418	1.44229
LUSC	femaleAmplifier	Hypermethylated	shelf	1	0.367725
LUSC	femaleAmplifier	Hypermethylated	island	1	0.346318
LUSC	femaleAmplifier	Hypermethylated	1stExon	1	0.995966
LUSC	femaleAmplifier	Hypermethylated	TSS200	1	0.127924
LUSC	femaleAmplifier	Hypermethylated	TSS1500	1	0.929727
LUSC	femaleAmplifier	Hypermethylated	3'UTR	1	0.487183
LUSC	femaleAmplifier	Hypermethylated	5'UTR	1	0.532328
LUSC	femaleAmplifier	Hypermethylated	Body	0.00899208	2.29235
LUSC	femaleAmplifier	Hypermethylated	IGR	1	0.833529
LUSC	femaleAmplifier	Hypermethylated	Distal enhancer	0.302678	1.49957
LUSC	femaleAmplifier	Hypomethylated	opensea	0.00512531	1.44027
LUSC	femaleAmplifier	Hypomethylated	shore	0.0875128	1.29401
LUSC	femaleAmplifier	Hypomethylated	shelf	0.911801	1.03718
LUSC	femaleAmplifier	Hypomethylated	island	1	0.498468
LUSC	femaleAmplifier	Hypermethylated	Insulator	1	0.611687
LUSC	femaleAmplifier	Hypermethylated	Promoter	1	0.579708
LUSC	femaleAmplifier	Hypermethylated	Proximal enhancer	1	0.604285
LUSC	femaleAmplifier	Hypermethylated	Distal enhancer	7.6601e-07	2.05925
LUSC	femaleAmplifier	Hypomethylated	1stExon	1	0.820699
LUSC	femaleAmplifier	Hypomethylated	TSS200	1	0.437158
LUSC	femaleAmplifier	Hypomethylated	TSS1500	1	1.06164
LUSC	femaleAmplifier	Hypomethylated	3'UTR	1	0.635227
LUSC	femaleAmplifier	Hypomethylated	1stExon	0.0711671	7.90599
LUSC	femaleAmplifier	Hypomethylated	TSS200	1	0.818733
LUSC	femaleAmplifier	Hypomethylated	TSS1500	1	0.646151
LUSC	femaleAmplifier	Hypomethylated	Insulator	1	0.406653
LUSC	femaleAmplifier	Hypomethylated	Promoter	1	0.619247
LUSC	femaleAmplifier	Hypomethylated	Proximal enhancer	1	0.658684
LUSC	femaleAmplifier	Hypomethylated	Distal enhancer	0.00165243	2.16865
LUSC	maleAmplifier	Hypomethylated	shelf	0.87684	1.03654
LUSC	maleAmplifier	Hypomethylated	island	1	0.326769
LUSC	maleAmplifier	Hypermethylated	opensea	0.0363157	1.40413
LUSC	maleAmplifier	Hypermethylated	shore	0.0372423	1.43903
LUSC	maleAmplifier	Hypermethylated	shelf	0.77358	1.10768
LUSC	maleAmplifier	Hypermethylated	island	1	0.422057
LUSC	maleAmplifier	Hypermethylated	opensea	1	0.851813
LUSC	maleAmplifier	Hypermethylated	TSS200	1	0.148203
LUSC	maleAmplifier	Hypermethylated	TSS1500	1	0.758138
LUSC	maleAmplifier	Hypermethylated	3'UTR	0.346977	1.63771
LUSC	maleAmplifier	Hypermethylated	5'UTR	1	1.03943
LUSC	maleAmplifier	Hypermethylated	Body	4.07953e-15	2.05897
LUSC	maleAmplifier	Hypermethylated	IGR	1	0.708137
LUSC	maleAmplifier	Hypermethylated	1stExon	1	0.308765
LUSC	maleAmplifier	Hypermethylated	TSS200	1	0.253333
LUSC	maleAmplifier	Hypermethylated	Promoter	0.00312938	1.3943
LUSC	maleAmplifier	Hypermethylated	Insulator	1	0
LUSC	maleAmplifier	Hypermethylated	Distal enhancer	5.22256e-11	1.89052
LUSC	maleAmplifier	Hypermethylated	Insulator	1	0.373003
LUSC	maleAmplifier	Hypermethylated	Proximal enhancer	1	0.785129
LUSC	maleAmplifier	Hypermethylated	Promoter	1	0.570833
LUSC	maleAmplifier	Hypermethylated	Distal enhancer	4.09074e-93	2.18654
LUSC	maleAmplifier	Hypomethylated	3'UTR	1	0.510952
LUSC	maleAmplifier	Hypomethylated	5'UTR	0.464758	1.51688
LUSC	maleAmplifier	Hypomethylated	Body	1	0.861655
LUSC	maleAmplifier	Hypomethylated	IGR	1	0.529624
LUSC	maleAmplifier	Hypomethylated	1stExon	1	0.529127
LUSC	maleAmplifier	Hypomethylated	TSS200	1	0.843948
LUSC	maleAmplifier	Hypomethylated	TSS1500	0.000510344	1.43664
LUSC	shared	Hypomethylated	shore	2.14474e-06	1.3134
LUSC	shared	Hypomethylated	shelf	0.0238381	1.22741
LUSC	shared	Hypomethylated	island	1	0.278927
LUSC	shared	Hypomethylated	opensea	3.1279e-164	3.62573
LUSC	shared	Hypomethylated	shore	1	0.55838
LUSC	shared	Hypomethylated	shelf	1	0.813758
LUSC	shared	Hypomethylated	island	1	0.283209
LUSC	shared	Hypomethylated	IGR	1	0.801157
LUSC	shared	Hypomethylated	1stExon	1	0.451233
LUSC	shared	Hypomethylated	TSS200	1	0.492251
LUSC	shared	Hypomethylated	TSS1500	1	0.815153
LUSC	shared	Hypomethylated	3'UTR	0.803222	1.13988
LUSC	shared	Hypomethylated	5'UTR	0.673854	1.10192
LUSC	shared	Hypomethylated	Body	0.000191814	1.2787
LUSC	shared	Hypermethylated	island	0.0544932	1.07238
LUSC	shared	Hypermethylated	1stExon	1	0.308653
LUSC	shared	Hypermethylated	TSS200	1	0.226381
LUSC	shared	Hypermethylated	TSS1500	1	0.359087
LUSC	shared	Hypermethylated	IGR	1.17298e-15	1.33661
LUSC	shared	Hypermethylated	opensea	8.32065e-05	5.80064
LUSC	shared	Hypermethylated	shore	1	0.256602
LUSC	shared	Hypermethylated	shelf	1	0.81328
LUSC	shared	Hypermethylated	island	1	0.239693
LUSC	shared	Hypermethylated	1stExon	1	1.47536
LUSC	shared	Hypermethylated	TSS200	1	0.589459
LUSC	shared	Hypermethylated	TSS1500	1	0.223656
LUSC	shared	Hypermethylated	Distal enhancer	8.56717e-09	2.3038
LUSC	shared	Hypermethylated	Proximal enhancer	1	0.465848
LUSC	shared	Hypermethylated	Promoter	1	0.221755
LUSC	shared	Hypermethylated	Insulator	1	0
THCA	femaleAmplifier	Hypermethylated	opensea	1	1.88005
THCA	femaleAmplifier	Hypermethylated	shore	1	0
THCA	femaleAmplifier	Hypermethylated	shelf	1	0
THCA	femaleAmplifier	Hypermethylated	island	1	2.09153
THCA	femaleAmplifier	Hypermethylated	1stExon	1	0
THCA	femaleAmplifier	Hypermethylated	TSS200	1	0
THCA	femaleAmplifier	Hypermethylated	TSS1500	1	0
THCA	femaleAmplifier	Hypermethylated	3'UTR	1	0
THCA	femaleAmplifier	Hypermethylated	5'UTR	1	0
THCA	femaleAmplifier	Hypermethylated	Body	1	1.96577
THCA	femaleAmplifier	Hypermethylated	IGR	1	3.44284
THCA	femaleAmplifier	Hypomethylated	opensea	0.68139	1.46228
THCA	femaleAmplifier	Hypomethylated	shore	0.396027	1.93602
THCA	femaleAmplifier	Hypomethylated	shelf	1	0.652362
THCA	femaleAmplifier	Hypomethylated	island	1	0.298782
THCA	femaleAmplifier	Hypomethylated	TSS200	1	0.983495
THCA	femaleAmplifier	Hypomethylated	TSS1500	1	0.756734
THCA	femaleAmplifier	Hypomethylated	3'UTR	1	1.13346
THCA	femaleAmplifier	Hypomethylated	5'UTR	1	1.10535
THCA	femaleAmplifier	Hypomethylated	TSS1500	1	0.975458
THCA	femaleAmplifier	Hypomethylated	3'UTR	1	0.650477
THCA	femaleAmplifier	Hypomethylated	5'UTR	1	0.621984
THCA	femaleAmplifier	Hypomethylated	Body	0.0571438	1.71439
THCA	femaleAmplifier	Hypomethylated	Promoter	0.0461738	1.5575
THCA	femaleAmplifier	Hypomethylated	Proximal enhancer	0.424596	1.19519
THCA	femaleAmplifier	Hypomethylated	Insulator	1	0
THCA	femaleAmplifier	Hypomethylated	Proximal enhancer	1.63298e-45	3.3844
THCA	femaleAmplifier	Hypomethylated	Insulator	0.244429	3.41587
THCA	femaleAmplifier	Hypomethylated	Proximal enhancer	0.244429	1.29147
THCA	femaleAmplifier	Hypomethylated	Promoter	0.826873	0.95131
THCA	maleAmplifier	Hypomethylated	opensea	3.15053e-05	1.92408
THCA	maleAmplifier	Hypermethylated	shelf	1	0.866992
THCA	maleAmplifier	Hypermethylated	island	1	0.763438
THCA	maleAmplifier	Hypermethylated	opensea	3.40148e-125	2.64679
THCA	maleAmplifier	Hypermethylated	opensea	0.46245	1.04668
THCA	maleAmplifier	Hypermethylated	shore	5.06118e-10	1.41037
THCA	maleAmplifier	Hypermethylated	shelf	2.43067e-09	1.58248
THCA	maleAmplifier	Hypermethylated	island	1	0.534151
THCA	maleAmplifier	Hypermethylated	3'UTR	0.47345	1.3553
THCA	maleAmplifier	Hypermethylated	5'UTR	1	0.660676
THCA	maleAmplifier	Hypermethylated	Body	1.5081e-08	1.75205
THCA	maleAmplifier	Hypermethylated	IGR	1	0.954758
THCA	maleAmplifier	Hypermethylated	1stExon	1	0.707092
THCA	maleAmplifier	Hypermethylated	TSS200	1	0.311532
THCA	maleAmplifier	Hypermethylated	TSS1500	1	0.480297
THCA	maleAmplifier	Hypermethylated	3'UTR	8.63749e-16	2.30438
THCA	maleAmplifier	Hypomethylated	3'UTR	1	0.725428
THCA	maleAmplifier	Hypomethylated	5'UTR	1	0.829449
THCA	maleAmplifier	Hypomethylated	Body	1	0.74269
THCA	maleAmplifier	Hypomethylated	IGR	0.0759033	1.7841
THCA	maleAmplifier	Hypomethylated	1stExon	1	1.66003
THCA	maleAmplifier	Hypomethylated	TSS200	1	1.17626
THCA	maleAmplifier	Hypomethylated	TSS1500	1	1.16218
THCA	maleAmplifier	Hypomethylated	Distal enhancer	1	1.03088
THCA	maleAmplifier	Hypomethylated	Insulator	1	0
THCA	maleAmplifier	Hypomethylated	Distal enhancer	1.11562e-18	3.58327
THCA	maleAmplifier	Hypomethylated	Proximal enhancer	1	0.77483
THCA	maleAmplifier	Hypomethylated	Promoter	1	0.692528
THCA	maleAmplifier	Hypomethylated	Insulator	1	0
THCA	maleAmplifier	Hypomethylated	Distal enhancer	1.05914e-20	2.19664
THCA	shared	Hypermethylated	shore	1	1.0062
THCA	shared	Hypermethylated	shelf	0.00010941	2.14474
THCA	shared	Hypermethylated	island	1	0.226273
THCA	shared	Hypermethylated	opensea	1.33204e-33	1.65276
THCA	shared	Hypermethylated	shore	1	0.760124
THCA	shared	Hypermethylated	shelf	0.010923	1.20703
THCA	shared	Hypermethylated	island	1	0.645959
THCA	shared	Hypomethylated	IGR	6.74727e-23	1.46224
THCA	shared	Hypomethylated	1stExon	1	0.675695
THCA	shared	Hypomethylated	TSS200	1	0.597138
THCA	shared	Hypomethylated	TSS1500	1	0.595469
THCA	shared	Hypomethylated	3'UTR	1	0.838486
THCA	shared	Hypomethylated	5'UTR	0.00202745	1.29037
THCA	shared	Hypomethylated	Body	0.00746792	1.15792
THCA	shared	Hypermethylated	TSS200	1	0.5635
THCA	shared	Hypermethylated	TSS1500	1	0.759151
THCA	shared	Hypermethylated	3'UTR	1	0.951308
THCA	shared	Hypermethylated	5'UTR	0.000510344	1.34204
THCA	shared	Hypomethylated	Distal enhancer	5.15678e-06	2.16252
THCA	shared	Hypomethylated	Proximal enhancer	0.531831	1.11853
THCA	shared	Hypomethylated	Promoter	0.914917	0.961144
THCA	shared	Hypomethylated	Insulator	0.914917	1.03292
THCA	shared	Hypomethylated	Distal enhancer	1.17322e-50	2.53809
THCA	shared	Hypomethylated	Proximal enhancer	0.00402482	1.2141
THCA	shared	Hypomethylated	Insulator	1	0.812481
THCA	shared	Hypomethylated	Promoter	1	0.781619
THCA	shared	Hypomethylated	Distal enhancer	1.41021e-35	1.97031
THCA	shared	Hypomethylated	Proximal enhancer	0.000444816	1.23308
THCA	shared	Hypomethylated	Promoter	1	0.88899
THCA	shared	Hypomethylated	Insulator	1	0.243557
