# Supplementary material for: Attenuated sex-related DNA methylation differences in cancer highlight the magnitude bias mediating existing disparities
Source: Biol Sex Differ. 2024 Dec 23;15:106. doi: 10.1186/s13293-024-00682-4 (PMC11664931; doi:10.1186/s13293-024-00682-4)
Supplement: Supplementary file 13 — Supplementary material 13. [file 13293_2024_682_MOESM13_ESM.xlsx]

## Sheet: TFBSenrich_LOLA
sexEffect	cancer	direction	TFBS	support	pValueLog	oddsRatio	qValue
femaleAmplifier	BLCA	Hypomethylated	KLF5	7	5.21977	28.096	2.08222e-05
femaleAmplifier	BLCA	Hypomethylated	P63	6	4.83565	23.8613	4.80046e-05
femaleAmplifier	BLCA	Hypomethylated	GRHL2	5	4.39629	22.7907	0.000129941
femaleAmplifier	BLCA	Hypomethylated	JUND	4	3.50877	18.576	0.000916344
femaleAmplifier	BLCA	Hypomethylated	ZBT17	4	3.43287	17.7106	0.00108355
femaleAmplifier	BLCA	Hypomethylated	E2F1	7	3.154	11.9758	0.00193796
femaleAmplifier	BLCA	Hypomethylated	NKX21	4	3.06023	13.9667	0.00238515
femaleAmplifier	BLCA	Hypomethylated	TF7L2	4	3.00566	13.4841	0.00266895
femaleAmplifier	BLCA	Hypomethylated	JUN	4	2.4239	9.16243	0.00950058
femaleAmplifier	BLCA	Hypomethylated	ESR1	7	2.10911	7.10698	0.0180617
femaleAmplifier	BLCA	Hypomethylated	ANDR	7	2.04988	6.87555	0.0204698
femaleAmplifier	BLCA	Hypomethylated	CTCF	7	1.94247	6.46638	0.0259232
femaleAmplifier	BLCA	Hypomethylated	GATA6	3	1.81529	7.52164	0.034177
femaleAmplifier	BLCA	Hypomethylated	P53	5	1.75602	5.16522	0.0387536
femaleAmplifier	BLCA	Hypomethylated	MYC	7	1.75285	5.77516	0.0388286
femaleAmplifier	BLCA	Hypomethylated	ATF4	1	1.69382	55.0607	0.0437795
femaleAmplifier	BLCA	Hypomethylated	TEAD4	2	1.536	9.07105	0.0616654
femaleAmplifier	BLCA	Hypomethylated	TEAD1	2	1.53002	9.00196	0.0621994
femaleAmplifier	BLCA	Hypomethylated	FOXA2	2	1.45498	8.17403	0.0728102
femaleAmplifier	BLCA	Hypomethylated	SMAD4	2	1.44137	8.03134	0.0747514
femaleAmplifier	BLCA	Hypomethylated	PRGR	4	1.43757	4.41757	0.075032
femaleAmplifier	BLCA	Hypomethylated	RXRA	3	1.42967	5.24147	0.0760291
femaleAmplifier	BLCA	Hypomethylated	HSF1	2	1.36718	7.28833	0.0865036
femaleAmplifier	BLCA	Hypomethylated	AP2A	2	1.30939	6.75417	0.0983329
femaleAmplifier	BLCA	Hypomethylated	FOXA1	5	1.29965	3.71888	0.100074
femaleAmplifier	BLCA	Hypomethylated	RARA	2	1.2282	6.0592	0.116277
femaleAmplifier	BLCA	Hypomethylated	ATF3	2	1.21654	5.96464	0.11831
femaleAmplifier	BLCA	Hypomethylated	FOSL2	1	1.18606	16.6425	0.126313
femaleAmplifier	BLCA	Hypomethylated	RUNX1	5	1.1039	3.17565	0.151902
femaleAmplifier	BLCA	Hypomethylated	SP1	5	1.08735	3.13191	0.156335
femaleAmplifier	BLCA	Hypomethylated	MAX	5	1.06131	3.06289	0.16451
femaleAmplifier	BLCA	Hypomethylated	ERG	3	1.05102	3.55479	0.166958
femaleAmplifier	BLCA	Hypomethylated	CEBPB	2	1.0473	4.72303	0.167473
femaleAmplifier	BLCA	Hypomethylated	BACH2	1	1.02765	11.3614	0.172164
femaleAmplifier	BLCA	Hypomethylated	AP2C	3	0.963759	3.22761	0.195951
femaleAmplifier	BLCA	Hypomethylated	PRD14	1	0.913326	8.57936	0.217222
femaleAmplifier	BLCA	Hypomethylated	PO5F1	3	0.792973	2.64078	0.27584
femaleAmplifier	BLCA	Hypomethylated	MAF	1	0.765575	5.9157	0.288986
femaleAmplifier	BLCA	Hypomethylated	GATA2	2	0.762516	3.09756	0.289841
femaleAmplifier	BLCA	Hypomethylated	SPI1	4	0.757681	2.34042	0.291894
femaleAmplifier	BLCA	Hypomethylated	GATA1	3	0.720649	2.41167	0.315181
femaleAmplifier	BLCA	Hypomethylated	ERR1	1	0.674082	4.66574	0.346806
femaleAmplifier	BLCA	Hypomethylated	KMT2B	2	0.631187	2.50189	0.37636
femaleAmplifier	BLCA	Hypomethylated	KLF4	1	0.629999	4.14971	0.37636
femaleAmplifier	BLCA	Hypomethylated	NRF1	2	0.616673	2.44082	0.382116
femaleAmplifier	BLCA	Hypomethylated	TFAP4	1	0.562835	3.45708	0.427613
femaleAmplifier	BLCA	Hypomethylated	CEBPA	1	0.559954	3.42965	0.428829
femaleAmplifier	BLCA	Hypomethylated	ASCL1	1	0.549758	3.33403	0.437359
femaleAmplifier	BLCA	Hypomethylated	GCR	2	0.430752	1.73359	0.56043
femaleAmplifier	BLCA	Hypomethylated	TYY1	2	0.426928	1.7203	0.560642
femaleAmplifier	BLCA	Hypomethylated	FOS	1	0.405796	2.1929	0.580766
femaleAmplifier	BLCA	Hypomethylated	HTF4	2	0.383225	1.57149	0.605409
femaleAmplifier	BLCA	Hypomethylated	CREB1	2	0.382619	1.56946	0.605409
femaleAmplifier	BLCA	Hypomethylated	NANOG	1	0.381544	2.03392	0.605409
femaleAmplifier	BLCA	Hypomethylated	TF65	3	0.372751	1.43225	0.61344
femaleAmplifier	BLCA	Hypomethylated	HNF4A	1	0.341555	1.78919	0.654516
femaleAmplifier	BLCA	Hypomethylated	VDR	1	0.338878	1.77354	0.656269
femaleAmplifier	BLCA	Hypomethylated	PPARG	1	0.30742	1.59603	0.697225
femaleAmplifier	BLCA	Hypomethylated	SMAD3	1	0.300293	1.55739	0.704963
femaleAmplifier	BLCA	Hypomethylated	TBP	1	0.28325	1.46725	0.730675
femaleAmplifier	BLCA	Hypomethylated	GATA3	1	0.270841	1.40353	0.749297
femaleAmplifier	BLCA	Hypomethylated	ETV1	1	0.245119	1.27628	0.786984
femaleAmplifier	BLCA	Hypomethylated	STAT1	1	0.243059	1.26636	0.788073
femaleAmplifier	BLCA	Hypomethylated	SOX2	1	0.214751	1.13373	0.835544
femaleAmplifier	BLCA	Hypomethylated	JARD2	1	0.199959	1.06707	0.861622
femaleAmplifier	BLCA	Hypomethylated	FOXM1	1	0.150053	0.853209	0.957007
femaleAmplifier	BLCA	Hypomethylated	TAL1	1	0.120473	0.732636	1
femaleAmplifier	BLCA	Hypomethylated	KDM5B	1	0.11755	0.720886	1
femaleAmplifier	BLCA	Hypomethylated	ETS1	1	0.0958841	0.634276	1
femaleAmplifier	BLCA	Hypomethylated	FLI1	1	0.0499397	0.446872	1
femaleAmplifier	BLCA	Hypomethylated	ARNT	0	0	0	1
femaleAmplifier	BLCA	Hypomethylated	ATRX	0	0	0	1
femaleAmplifier	BLCA	Hypomethylated	BCL6	0	0	0	1
femaleAmplifier	BLCA	Hypomethylated	BMAL1	0	0	0	1
femaleAmplifier	BLCA	Hypomethylated	CDX2	0	0	0	1
femaleAmplifier	BLCA	Hypomethylated	COE1	0	0	0	1
femaleAmplifier	BLCA	Hypomethylated	COT2	0	0	0	1
femaleAmplifier	BLCA	Hypomethylated	DUX4	0	0	0	1
femaleAmplifier	BLCA	Hypomethylated	E2F4	0	0	0	1
femaleAmplifier	BLCA	Hypomethylated	EGR2	0	0	0	1
femaleAmplifier	BLCA	Hypomethylated	ELF1	0	0	0	1
femaleAmplifier	BLCA	Hypomethylated	ELK4	0	0	0	1
femaleAmplifier	BLCA	Hypomethylated	EPAS1	0	0	0	1
femaleAmplifier	BLCA	Hypomethylated	ESR2	0	0	0	1
femaleAmplifier	BLCA	Hypomethylated	FOXK1	0	0	0	1
femaleAmplifier	BLCA	Hypomethylated	FOXO1	0	0	0	1
femaleAmplifier	BLCA	Hypomethylated	FOXP1	0	0	0	1
femaleAmplifier	BLCA	Hypomethylated	GABPA	0	0	0	1
femaleAmplifier	BLCA	Hypomethylated	GATA4	0	0	0	1
femaleAmplifier	BLCA	Hypomethylated	HIF1A	0	0	0	1
femaleAmplifier	BLCA	Hypomethylated	IKZF1	0	0	0	1
femaleAmplifier	BLCA	Hypomethylated	IRF1	0	0	0	1
femaleAmplifier	BLCA	Hypomethylated	IRF2	0	0	0	1
femaleAmplifier	BLCA	Hypomethylated	KDM5A	0	0	0	1
femaleAmplifier	BLCA	Hypomethylated	KDM5C	0	0	0	1
femaleAmplifier	BLCA	Hypomethylated	KLF1	0	0	0	1
femaleAmplifier	BLCA	Hypomethylated	KLF6	0	0	0	1
femaleAmplifier	BLCA	Hypomethylated	KMT2A	0	0	0	1
femaleAmplifier	BLCA	Hypomethylated	LEF1	0	0	0	1
femaleAmplifier	BLCA	Hypomethylated	LYL1	0	0	0	1
femaleAmplifier	BLCA	Hypomethylated	MEIS1	0	0	0	1
femaleAmplifier	BLCA	Hypomethylated	MITF	0	0	0	1
femaleAmplifier	BLCA	Hypomethylated	MYBB	0	0	0	1
femaleAmplifier	BLCA	Hypomethylated	MYB	0	0	0	1
femaleAmplifier	BLCA	Hypomethylated	MYCN	0	0	0	1
femaleAmplifier	BLCA	Hypomethylated	NCOA1	0	0	0	1
femaleAmplifier	BLCA	Hypomethylated	NCOR1	0	0	0	1
femaleAmplifier	BLCA	Hypomethylated	NCOR2	0	0	0	1
femaleAmplifier	BLCA	Hypomethylated	NFE2	0	0	0	1
femaleAmplifier	BLCA	Hypomethylated	NFKB1	0	0	0	1
femaleAmplifier	BLCA	Hypomethylated	NFYA	0	0	0	1
femaleAmplifier	BLCA	Hypomethylated	NKX31	0	0	0	1
femaleAmplifier	BLCA	Hypomethylated	NR1H3	0	0	0	1
femaleAmplifier	BLCA	Hypomethylated	NR2C2	0	0	0	1
femaleAmplifier	BLCA	Hypomethylated	OTX2	0	0	0	1
femaleAmplifier	BLCA	Hypomethylated	PAX5	0	0	0	1
femaleAmplifier	BLCA	Hypomethylated	PAX6	0	0	0	1
femaleAmplifier	BLCA	Hypomethylated	PDX1	0	0	0	1
femaleAmplifier	BLCA	Hypomethylated	PO2F1	0	0	0	1
femaleAmplifier	BLCA	Hypomethylated	PRDM1	0	0	0	1
femaleAmplifier	BLCA	Hypomethylated	REST	0	0	0	1
femaleAmplifier	BLCA	Hypomethylated	SIX2	0	0	0	1
femaleAmplifier	BLCA	Hypomethylated	SMAD1	0	0	0	1
femaleAmplifier	BLCA	Hypomethylated	SMAD2	0	0	0	1
femaleAmplifier	BLCA	Hypomethylated	SMRC1	0	0	0	1
femaleAmplifier	BLCA	Hypomethylated	SNPC4	0	0	0	1
femaleAmplifier	BLCA	Hypomethylated	SOX9	0	0	0	1
femaleAmplifier	BLCA	Hypomethylated	STA5A	0	0	0	1
femaleAmplifier	BLCA	Hypomethylated	STAT3	0	0	0	1
femaleAmplifier	BLCA	Hypomethylated	STAT4	0	0	0	1
femaleAmplifier	BLCA	Hypomethylated	SUH	0	0	0	1
femaleAmplifier	BLCA	Hypomethylated	TBX21	0	0	0	1
femaleAmplifier	BLCA	Hypomethylated	TFE2	0	0	0	1
femaleAmplifier	BLCA	Hypomethylated	UBF1	0	0	0	1
femaleAmplifier	BLCA	Hypomethylated	ZFX	0	0	0	1
femaleAmplifier	BLCA	Hypomethylated	ZN143	0	0	0	1
femaleAmplifier	BLCA	Hypomethylated	ZN263	0	0	0	1
maleAmplifier	BLCA	Hypomethylated	RUNX1	423	60.4968	3.42419	1.30932e-58
maleAmplifier	BLCA	Hypomethylated	MYC	476	48.3477	3.0065	9.22802e-47
maleAmplifier	BLCA	Hypomethylated	TF65	372	45.3255	2.92124	6.47526e-44
maleAmplifier	BLCA	Hypomethylated	SPI1	361	41.9118	2.81022	1.25886e-40
maleAmplifier	BLCA	Hypomethylated	MAX	388	40.4198	2.72431	3.12631e-39
maleAmplifier	BLCA	Hypomethylated	GRHL2	130	33.229	3.92313	4.04284e-32
maleAmplifier	BLCA	Hypomethylated	GATA3	167	32.7678	3.30031	1.00224e-31
maleAmplifier	BLCA	Hypomethylated	JUN	158	29.0637	3.13414	3.9436e-28
maleAmplifier	BLCA	Hypomethylated	FOXA1	322	27.1461	2.30864	2.66878e-26
maleAmplifier	BLCA	Hypomethylated	MYB	185	27.0118	2.76484	3.33314e-26
maleAmplifier	BLCA	Hypomethylated	BCL6	213	24.1799	2.45691	2.08917e-23
maleAmplifier	BLCA	Hypomethylated	GCR	209	22.8627	2.40439	3.52387e-22
maleAmplifier	BLCA	Hypomethylated	TBX21	68	21.963	4.55773	2.35563e-21
maleAmplifier	BLCA	Hypomethylated	FLI1	278	21.8606	2.16571	2.83271e-21
maleAmplifier	BLCA	Hypomethylated	NKX21	112	21.7959	3.13867	3.13118e-21
maleAmplifier	BLCA	Hypomethylated	CTCF	380	19.2126	1.96468	9.68908e-19
maleAmplifier	BLCA	Hypomethylated	JUND	89	18.3365	3.19984	6.76293e-18
maleAmplifier	BLCA	Hypomethylated	CEBPA	80	17.7935	3.35432	2.13284e-17
maleAmplifier	BLCA	Hypomethylated	SUH	137	16.6083	2.40848	2.9788e-16
maleAmplifier	BLCA	Hypomethylated	TFE2	44	16.4184	5.09599	4.48119e-16
maleAmplifier	BLCA	Hypomethylated	BACH2	41	16.2131	5.40239	6.98921e-16
maleAmplifier	BLCA	Hypomethylated	LYL1	37	15.8888	5.8937	1.36122e-15
maleAmplifier	BLCA	Hypomethylated	GATA2	131	15.2301	2.3468	5.6267e-15
maleAmplifier	BLCA	Hypomethylated	FOS	97	14.9433	2.66495	1.04066e-14
maleAmplifier	BLCA	Hypomethylated	ERG	169	14.9154	2.1171	1.0857e-14
maleAmplifier	BLCA	Hypomethylated	ATF3	86	14.3108	2.76494	4.27466e-14
maleAmplifier	BLCA	Hypomethylated	TAL1	188	14.2028	2.00804	5.3389e-14
maleAmplifier	BLCA	Hypomethylated	ESR1	344	13.9481	1.77567	9.26244e-14
maleAmplifier	BLCA	Hypomethylated	CEBPB	98	13.8796	2.54024	1.0428e-13
maleAmplifier	BLCA	Hypomethylated	TFAP4	71	13.4301	2.95767	2.77551e-13
maleAmplifier	BLCA	Hypomethylated	VDR	106	13.2309	2.38753	4.25863e-13
maleAmplifier	BLCA	Hypomethylated	ETS1	202	13.2287	1.91614	4.25863e-13
maleAmplifier	BLCA	Hypomethylated	HTF4	192	13.1695	1.93831	4.79655e-13
maleAmplifier	BLCA	Hypomethylated	ANDR	344	12.52	1.71768	2.06855e-12
maleAmplifier	BLCA	Hypomethylated	GABPA	174	11.617	1.89745	1.55119e-11
maleAmplifier	BLCA	Hypomethylated	AP2C	167	11.1868	1.89165	3.98957e-11
maleAmplifier	BLCA	Hypomethylated	STAT1	124	10.9179	2.05104	7.30225e-11
maleAmplifier	BLCA	Hypomethylated	TF7L2	88	10.4357	2.28856	2.06449e-10
maleAmplifier	BLCA	Hypomethylated	TEAD4	59	10.3441	2.77011	2.5147e-10
maleAmplifier	BLCA	Hypomethylated	GATA1	196	9.94803	1.74715	5.93911e-10
maleAmplifier	BLCA	Hypomethylated	PPARG	103	9.679	2.07639	1.07584e-09
maleAmplifier	BLCA	Hypomethylated	PRGR	177	9.25318	1.74502	2.76429e-09
maleAmplifier	BLCA	Hypomethylated	RXRA	115	8.98735	1.93928	4.92037e-09
maleAmplifier	BLCA	Hypomethylated	P63	104	8.54469	1.96225	1.30288e-08
maleAmplifier	BLCA	Hypomethylated	P53	209	8.34098	1.63483	2.05979e-08
maleAmplifier	BLCA	Hypomethylated	KLF5	134	8.0732	1.78314	3.77444e-08
maleAmplifier	BLCA	Hypomethylated	NCOR2	23	7.96365	4.42471	4.80519e-08
maleAmplifier	BLCA	Hypomethylated	SMAD1	59	7.5454	2.30281	1.21947e-07
maleAmplifier	BLCA	Hypomethylated	SMAD3	97	7.35857	1.88953	1.83674e-07
maleAmplifier	BLCA	Hypomethylated	TEAD1	52	7.29181	2.39602	2.0991e-07
maleAmplifier	BLCA	Hypomethylated	RARA	67	7.13818	2.12331	2.96031e-07
maleAmplifier	BLCA	Hypomethylated	STA5A	38	6.63417	2.65865	9.17569e-07
maleAmplifier	BLCA	Hypermethylated	SIX2	135	8.37073	1.75071	1.16687e-06
maleAmplifier	BLCA	Hypomethylated	FOSL2	21	6.51355	3.92671	1.18847e-06
maleAmplifier	BLCA	Hypomethylated	IRF1	82	6.42653	1.88809	1.43857e-06
maleAmplifier	BLCA	Hypomethylated	HNF4A	84	6.15223	1.84212	2.68031e-06
maleAmplifier	BLCA	Hypomethylated	GATA6	81	6.11486	1.85836	2.86805e-06
maleAmplifier	BLCA	Hypomethylated	KMT2B	118	6.02142	1.6692	3.49304e-06
maleAmplifier	BLCA	Hypomethylated	FOXM1	140	5.92779	1.60023	4.29513e-06
maleAmplifier	BLCA	Hypomethylated	AP2A	56	5.08667	1.9454	2.8054e-05
maleAmplifier	BLCA	Hypomethylated	ZBT17	55	4.07001	1.78573	0.000267031
maleAmplifier	BLCA	Hypomethylated	NFKB1	13	4.0589	3.70227	0.000271874
maleAmplifier	BLCA	Hypomethylated	CREB1	152	4.0055	1.42629	0.000305134
maleAmplifier	BLCA	Hypomethylated	NCOR1	83	3.80322	1.56974	0.000475426
maleAmplifier	BLCA	Hypomethylated	PAX5	31	3.22444	1.95555	0.00171422
maleAmplifier	BLCA	Hypomethylated	GATA4	33	3.18069	1.90028	0.0018538
maleAmplifier	BLCA	Hypomethylated	SOX2	99	2.8474	1.40661	0.00381726
maleAmplifier	BLCA	Hypomethylated	ATF4	7	2.77852	4.2454	0.0044443
maleAmplifier	BLCA	Hypomethylated	KLF4	36	2.62367	1.70533	0.00618749
maleAmplifier	BLCA	Hypomethylated	MEIS1	6	2.58072	4.50564	0.00674537
maleAmplifier	BLCA	Hypomethylated	NCOA1	18	2.42004	2.08684	0.00952695
maleAmplifier	BLCA	Hypomethylated	REST	64	2.36365	1.44515	0.0107172
maleAmplifier	BLCA	Hypomethylated	IRF2	8	2.34351	3.18879	0.0111589
maleAmplifier	BLCA	Hypomethylated	NKX31	11	2.34059	2.59762	0.0111671
maleAmplifier	BLCA	Hypomethylated	FOXP1	60	2.29879	1.45137	0.0122227
maleAmplifier	BLCA	Hypomethylated	ASCL1	41	2.29538	1.57111	0.0122466
maleAmplifier	BLCA	Hypomethylated	NFE2	30	2.20369	1.6768	0.0148628
maleAmplifier	BLCA	Hypomethylated	COT2	13	2.19302	2.27481	0.0150585
maleAmplifier	BLCA	Hypomethylated	SIX2	41	2.08853	1.52316	0.0188316
maleAmplifier	BLCA	Hypomethylated	ERR1	30	1.89349	1.58359	0.028859
maleAmplifier	BLCA	Hypomethylated	E2F1	192	1.79057	1.20384	0.0359829
maleAmplifier	BLCA	Hypomethylated	OTX2	4	1.67912	3.91037	0.0450492
maleAmplifier	BLCA	Hypomethylated	SMAD2	19	1.66563	1.70096	0.0462281
maleAmplifier	BLCA	Hypomethylated	KLF1	16	1.54842	1.73289	0.0602376
maleAmplifier	BLCA	Hypomethylated	EGR2	25	1.493	1.51782	0.0670466
maleAmplifier	BLCA	Hypomethylated	HIF1A	55	1.41013	1.30256	0.0791332
maleAmplifier	BLCA	Hypomethylated	PDX1	8	1.22371	1.94293	0.116927
maleAmplifier	BLCA	Hypomethylated	ZN143	60	1.09	1.22198	0.156109
maleAmplifier	BLCA	Hypomethylated	COE1	11	1.06119	1.61795	0.16451
maleAmplifier	BLCA	Hypomethylated	PRDM1	4	1.05079	2.40476	0.166958
maleAmplifier	BLCA	Hypomethylated	NRF1	89	1.03914	1.17206	0.169181
maleAmplifier	BLCA	Hypomethylated	BMAL1	11	1.00553	1.57757	0.180355
maleAmplifier	BLCA	Hypomethylated	MITF	25	0.992494	1.33101	0.185029
maleAmplifier	BLCA	Hypomethylated	MYBB	4	0.985168	2.27398	0.187347
maleAmplifier	BLCA	Hypomethylated	TYY1	117	0.935977	1.13474	0.207079
maleAmplifier	BLCA	Hypomethylated	SNPC4	1	0.892841	7.44231	0.226732
maleAmplifier	BLCA	Hypomethylated	HSF1	34	0.861245	1.2327	0.240729
maleAmplifier	BLCA	Hypomethylated	NANOG	50	0.844039	1.18303	0.249397
maleAmplifier	BLCA	Hypomethylated	KDM5C	22	0.804194	1.27595	0.269929
maleAmplifier	BLCA	Hypomethylated	PAX6	1	0.719082	4.77679	0.315181
maleAmplifier	BLCA	Hypomethylated	SMRC1	1	0.654207	4.02986	0.361605
maleAmplifier	BLCA	Hypomethylated	ARNT	3	0.63105	1.80664	0.37636
maleAmplifier	BLCA	Hypomethylated	NR2C2	17	0.619317	1.222	0.382116
maleAmplifier	BLCA	Hypomethylated	ELF1	97	0.617845	1.08548	0.382116
maleAmplifier	BLCA	Hypomethylated	LEF1	9	0.600661	1.31865	0.394948
maleAmplifier	BLCA	Hypomethylated	MAF	18	0.563993	1.18356	0.427613
maleAmplifier	BLCA	Hypomethylated	STAT3	12	0.539601	1.21878	0.446025
maleAmplifier	BLCA	Hypomethylated	FOXA2	28	0.534239	1.1283	0.449875
maleAmplifier	BLCA	Hypomethylated	NFYA	74	0.527995	1.07449	0.454686
maleAmplifier	BLCA	Hypomethylated	FOXK1	5	0.425824	1.24617	0.560642
maleAmplifier	BLCA	Hypomethylated	ESR2	11	0.412388	1.12917	0.576162
maleAmplifier	BLCA	Hypomethylated	NR1H3	1	0.407621	2.02521	0.580418
maleAmplifier	BLCA	Hypomethylated	TBP	60	0.389227	1.03887	0.601189
maleAmplifier	BLCA	Hypomethylated	MYCN	67	0.376017	1.03233	0.610996
maleAmplifier	BLCA	Hypomethylated	STAT4	1	0.316321	1.52249	0.686473
maleAmplifier	BLCA	Hypomethylated	EPAS1	2	0.306576	1.20851	0.697225
maleAmplifier	BLCA	Hypomethylated	SMAD4	25	0.254152	0.985276	0.776011
maleAmplifier	BLCA	Hypomethylated	ETV1	65	0.250534	0.986091	0.779859
maleAmplifier	BLCA	Hypomethylated	IKZF1	12	0.221644	0.956073	0.825139
maleAmplifier	BLCA	Hypomethylated	KDM5B	106	0.193726	0.967186	0.871181
maleAmplifier	BLCA	Hypomethylated	ELK4	15	0.174036	0.913643	0.90858
maleAmplifier	BLCA	Hypomethylated	DUX4	1	0.131124	0.744437	0.996364
maleAmplifier	BLCA	Hypermethylated	FOSL2	22	1.0658	1.38634	1
maleAmplifier	BLCA	Hypermethylated	OTX2	5	0.735048	1.67641	1
maleAmplifier	BLCA	Hypermethylated	TEAD1	71	0.560604	1.08162	1
maleAmplifier	BLCA	Hypermethylated	NKX31	14	0.437021	1.12701	1
maleAmplifier	BLCA	Hypermethylated	CDX2	1	0.393125	1.95114	1
maleAmplifier	BLCA	Hypermethylated	COT2	16	0.214241	0.952229	1
maleAmplifier	BLCA	Hypermethylated	PPARG	151	0.182877	0.969103	1
maleAmplifier	BLCA	Hypermethylated	MEIS1	3	0.124117	0.763475	1
maleAmplifier	BLCA	Hypermethylated	PDX1	10	0.117995	0.829288	1
maleAmplifier	BLCA	Hypermethylated	ATF4	3	0.0635026	0.615473	1
maleAmplifier	BLCA	Hypermethylated	TEAD4	57	0.0608597	0.867751	1
maleAmplifier	BLCA	Hypermethylated	ERR1	47	0.0452675	0.83698	1
maleAmplifier	BLCA	Hypermethylated	DUX4	2	0.0451997	0.511698	1
maleAmplifier	BLCA	Hypermethylated	GATA2	163	0.0342208	0.893088	1
maleAmplifier	BLCA	Hypermethylated	ARNT	2	0.0203177	0.41141	1
maleAmplifier	BLCA	Hypermethylated	ESR2	16	0.00189005	0.560121	1
maleAmplifier	BLCA	Hypermethylated	FOXA2	48	0.000354273	0.654521	1
maleAmplifier	BLCA	Hypermethylated	LYL1	7	0.000178513	0.360357	1
maleAmplifier	BLCA	Hypermethylated	COE1	7	0.000112788	0.34868	1
maleAmplifier	BLCA	Hypermethylated	CEBPB	84	3.12699e-05	0.673625	1
maleAmplifier	BLCA	Hypermethylated	TFE2	10	3.01684e-05	0.371857	1
maleAmplifier	BLCA	Hypermethylated	PRGR	266	2.33644e-05	0.782392	1
maleAmplifier	BLCA	Hypermethylated	PRD14	12	1.48304e-05	0.385153	1
maleAmplifier	BLCA	Hypermethylated	ASCL1	45	8.31608e-06	0.571011	1
maleAmplifier	BLCA	Hypermethylated	GATA4	25	5.03462e-06	0.476877	1
maleAmplifier	BLCA	Hypermethylated	FOXK1	1	3.48353e-06	0.0847681	1
maleAmplifier	BLCA	Hypermethylated	MITF	26	1.60557e-06	0.464584	1
maleAmplifier	BLCA	Hypermethylated	BMAL1	4	8.98778e-07	0.193788	1
maleAmplifier	BLCA	Hypermethylated	SOX2	150	3.58759e-07	0.681987	1
maleAmplifier	BLCA	Hypermethylated	BACH2	4	6.72708e-08	0.169064	1
maleAmplifier	BLCA	Hypermethylated	ATF3	52	3.22892e-08	0.517932	1
maleAmplifier	BLCA	Hypermethylated	LEF1	2	1.835e-08	0.0991592	1
maleAmplifier	BLCA	Hypermethylated	NCOA1	4	1.02287e-08	0.154899	1
maleAmplifier	BLCA	Hypermethylated	NANOG	68	2.70647e-09	0.532049	1
maleAmplifier	BLCA	Hypermethylated	HNF4A	75	9.46705e-11	0.517894	1
maleAmplifier	BLCA	Hypermethylated	SMAD1	29	1.29688e-11	0.361155	1
maleAmplifier	BLCA	Hypermethylated	SMAD2	4	1.17013e-11	0.119529	1
maleAmplifier	BLCA	Hypermethylated	CEBPA	27	1.01729e-11	0.348827	1
maleAmplifier	BLCA	Hypermethylated	AP2A	34	6.23254e-12	0.379782	1
maleAmplifier	BLCA	Hypermethylated	PAX5	10	3.87602e-12	0.207591	1
maleAmplifier	BLCA	Hypermethylated	GRHL2	50	3.67264e-12	0.434159	1
maleAmplifier	BLCA	Hypermethylated	JUND	34	2.28734e-12	0.372958	1
maleAmplifier	BLCA	Hypermethylated	GATA3	95	9.56999e-13	0.51967	1
maleAmplifier	BLCA	Hypermethylated	FOXA1	404	7.74162e-13	0.690621	1
maleAmplifier	BLCA	Hypermethylated	KLF1	1	5.77005e-13	0.0362237	1
maleAmplifier	BLCA	Hypermethylated	STAT3	1	1.15816e-13	0.0342013	1
maleAmplifier	BLCA	Hypermethylated	GATA6	61	7.85445e-14	0.439446	1
maleAmplifier	BLCA	Hypermethylated	TF7L2	51	4.62877e-14	0.409538	1
maleAmplifier	BLCA	Hypermethylated	TFAP4	22	4.03089e-14	0.285684	1
maleAmplifier	BLCA	Hypermethylated	NKX21	48	3.40408e-14	0.398676	1
maleAmplifier	BLCA	Hypermethylated	IKZF1	3	3.26425e-14	0.0806471	1
maleAmplifier	BLCA	Hypermethylated	KLF4	13	1.25363e-15	0.201629	1
maleAmplifier	BLCA	Hypermethylated	SMAD3	72	1.92865e-16	0.431855	1
maleAmplifier	BLCA	Hypermethylated	JUN	80	9.64327e-17	0.44277	1
maleAmplifier	BLCA	Hypermethylated	SMAD4	17	9.64327e-17	0.223679	1
maleAmplifier	BLCA	Hypermethylated	ANDR	458	0	0.532664	1
maleAmplifier	BLCA	Hypermethylated	CTCF	431	0	0.463615	1
maleAmplifier	BLCA	Hypermethylated	GCR	177	0	0.545104	1
maleAmplifier	BLCA	Hypermethylated	ESR1	393	0	0.454497	1
maleAmplifier	BLCA	Hypermethylated	MYC	354	0	0.324826	1
maleAmplifier	BLCA	Hypermethylated	JARD2	99	0	0.412123	1
maleAmplifier	BLCA	Hypermethylated	SP1	246	0	0.323385	1
maleAmplifier	BLCA	Hypermethylated	SPI1	204	0	0.306302	1
maleAmplifier	BLCA	Hypermethylated	P63	74	0	0.425546	1
maleAmplifier	BLCA	Hypermethylated	PO5F1	127	0	0.331339	1
maleAmplifier	BLCA	Hypermethylated	AP2C	112	0	0.354598	1
maleAmplifier	BLCA	Hypermethylated	TF65	184	0	0.267629	1
maleAmplifier	BLCA	Hypermethylated	GATA1	129	0	0.307575	1
maleAmplifier	BLCA	Hypermethylated	TAL1	115	0	0.331009	1
maleAmplifier	BLCA	Hypermethylated	MAX	198	0	0.248004	1
maleAmplifier	BLCA	Hypermethylated	ERG	84	0	0.288791	1
maleAmplifier	BLCA	Hypermethylated	P53	126	0	0.256819	1
maleAmplifier	BLCA	Hypermethylated	RUNX1	152	0	0.192723	1
maleAmplifier	BLCA	Hypermethylated	FLI1	114	0	0.199695	1
maleAmplifier	BLCA	Hypermethylated	STAT1	55	0	0.265668	1
maleAmplifier	BLCA	Hypermethylated	E2F1	79	0	0.130093	1
maleAmplifier	BLCA	Hypermethylated	FOS	34	0	0.281636	1
maleAmplifier	BLCA	Hypermethylated	FOXM1	51	0	0.165471	1
maleAmplifier	BLCA	Hypermethylated	KLF5	41	0	0.155614	1
maleAmplifier	BLCA	Hypermethylated	ZBT17	25	0	0.260114	1
maleAmplifier	BLCA	Hypermethylated	CREB1	46	0	0.11975	1
maleAmplifier	BLCA	Hypermethylated	HIF1A	23	0	0.174464	1
maleAmplifier	BLCA	Hypermethylated	GABPA	34	0	0.0983295	1
maleAmplifier	BLCA	Hypermethylated	HSF1	17	0	0.203009	1
maleAmplifier	BLCA	Hypermethylated	ETS1	35	0	0.0836891	1
maleAmplifier	BLCA	Hypermethylated	ETV1	26	0	0.124683	1
maleAmplifier	BLCA	Hypermethylated	KMT2B	27	0	0.11107	1
maleAmplifier	BLCA	Hypermethylated	HTF4	32	0	0.0828268	1
maleAmplifier	BLCA	Hypermethylated	FOXP1	20	0	0.15352	1
maleAmplifier	BLCA	Hypermethylated	VDR	21	0	0.139649	1
maleAmplifier	BLCA	Hypermethylated	KDM5B	29	0	0.0785944	1
maleAmplifier	BLCA	Hypermethylated	MYCN	22	0	0.106601	1
maleAmplifier	BLCA	Hypermethylated	TYY1	23	0	0.0648866	1
maleAmplifier	BLCA	Hypermethylated	RARA	11	0	0.108773	1
maleAmplifier	BLCA	Hypermethylated	REST	12	0	0.0850819	1
maleAmplifier	BLCA	Hypermethylated	BCL6	20	0	0.0564874	1
maleAmplifier	BLCA	Hypermethylated	RXRA	15	0	0.0734261	1
maleAmplifier	BLCA	Hypermethylated	NFYA	14	0	0.0629744	1
maleAmplifier	BLCA	Hypermethylated	NRF1	15	0	0.0598261	1
maleAmplifier	BLCA	Hypermethylated	ZN143	12	0	0.0772249	1
maleAmplifier	BLCA	Hypermethylated	MYB	14	0	0.0537745	1
maleAmplifier	BLCA	Hypermethylated	KDM5C	4	0	0.0771675	1
maleAmplifier	BLCA	Hypermethylated	ELF1	10	0	0.0334163	1
maleAmplifier	BLCA	Hypermethylated	TBX21	3	0	0.0620655	1
maleAmplifier	BLCA	Hypermethylated	SUH	6	0	0.0293852	1
maleAmplifier	BLCA	Hypermethylated	E2F4	3	0	0.0386415	1
maleAmplifier	BLCA	Hypermethylated	NCOR1	5	0	0.02875	1
maleAmplifier	BLCA	Hypermethylated	KMT2A	3	0	0.0303875	1
maleAmplifier	BLCA	Hypermethylated	NR2C2	2	0	0.0481048	1
maleAmplifier	BLCA	Hypermethylated	IRF1	3	0	0.0209952	1
maleAmplifier	BLCA	Hypermethylated	NFE2	2	0	0.0366838	1
maleAmplifier	BLCA	Hypermethylated	TBP	3	0	0.0163492	1
maleAmplifier	BLCA	Hypermethylated	KDM5A	2	0	0.0207588	1
maleAmplifier	BLCA	Hypermethylated	EGR2	1	0	0.0200603	1
maleAmplifier	BLCA	Hypermethylated	ZFX	1	0	0.00964172	1
maleAmplifier	BLCA	Hypermethylated	ATRX	0	0	0	1
maleAmplifier	BLCA	Hypermethylated	ELK4	0	0	0	1
maleAmplifier	BLCA	Hypermethylated	EPAS1	0	0	0	1
maleAmplifier	BLCA	Hypermethylated	FOXO1	0	0	0	1
maleAmplifier	BLCA	Hypermethylated	IRF2	0	0	0	1
maleAmplifier	BLCA	Hypermethylated	KLF6	0	0	0	1
maleAmplifier	BLCA	Hypermethylated	MAF	0	0	0	1
maleAmplifier	BLCA	Hypermethylated	MYBB	0	0	0	1
maleAmplifier	BLCA	Hypermethylated	NCOR2	0	0	0	1
maleAmplifier	BLCA	Hypermethylated	NFKB1	0	0	0	1
maleAmplifier	BLCA	Hypermethylated	NR1H3	0	0	0	1
maleAmplifier	BLCA	Hypermethylated	PAX6	0	0	0	1
maleAmplifier	BLCA	Hypermethylated	PO2F1	0	0	0	1
maleAmplifier	BLCA	Hypermethylated	PRDM1	0	0	0	1
maleAmplifier	BLCA	Hypermethylated	SMRC1	0	0	0	1
maleAmplifier	BLCA	Hypermethylated	SNPC4	0	0	0	1
maleAmplifier	BLCA	Hypermethylated	SOX9	0	0	0	1
maleAmplifier	BLCA	Hypermethylated	STA5A	0	0	0	1
maleAmplifier	BLCA	Hypermethylated	STAT4	0	0	0	1
maleAmplifier	BLCA	Hypermethylated	UBF1	0	0	0	1
maleAmplifier	BLCA	Hypermethylated	ZN263	0	0	0	1
maleAmplifier	BLCA	Hypomethylated	ZFX	30	0.109868	0.880416	1
maleAmplifier	BLCA	Hypomethylated	KMT2A	28	0.092946	0.859772	1
maleAmplifier	BLCA	Hypomethylated	PO5F1	107	0.0622326	0.89536	1
maleAmplifier	BLCA	Hypomethylated	E2F4	20	0.0471607	0.771961	1
maleAmplifier	BLCA	Hypomethylated	PRD14	7	0.0432044	0.656532	1
maleAmplifier	BLCA	Hypomethylated	SP1	195	0.0431016	0.899446	1
maleAmplifier	BLCA	Hypomethylated	UBF1	2	0.0147626	0.381808	1
maleAmplifier	BLCA	Hypomethylated	KDM5A	20	0.004287	0.622242	1
maleAmplifier	BLCA	Hypomethylated	JARD2	31	5.30737e-11	0.373651	1
maleAmplifier	BLCA	Hypomethylated	ATRX	0	0	0	1
maleAmplifier	BLCA	Hypomethylated	CDX2	0	0	0	1
maleAmplifier	BLCA	Hypomethylated	FOXO1	0	0	0	1
maleAmplifier	BLCA	Hypomethylated	KLF6	0	0	0	1
maleAmplifier	BLCA	Hypomethylated	PO2F1	0	0	0	1
maleAmplifier	BLCA	Hypomethylated	SOX9	0	0	0	1
maleAmplifier	BLCA	Hypomethylated	ZN263	0	0	0	1
shared	BLCA	Hypomethylated	JUND	38	30.3767	21.0666	2.1581e-29
shared	BLCA	Hypomethylated	JUN	46	28.9596	15.5216	4.51051e-28
shared	BLCA	Hypomethylated	GRHL2	35	23.2018	14.2117	1.75929e-22
shared	BLCA	Hypomethylated	TF65	64	23.1924	11.4666	1.75929e-22
shared	BLCA	Hypomethylated	NKX21	35	22.6228	13.6053	5.76229e-22
shared	BLCA	Hypomethylated	RUNX1	65	21.9961	11.0169	2.30367e-21
shared	BLCA	Hypomethylated	P53	55	20.8162	9.09808	2.85245e-20
shared	BLCA	Hypomethylated	MAX	64	20.3303	9.80746	8.35335e-20
shared	BLCA	Hypomethylated	MYC	70	19.4347	11.5557	6.29436e-19
shared	BLCA	Hypomethylated	FOS	32	19.3704	11.7173	7.00719e-19
shared	BLCA	Hypomethylated	GCR	46	18.6275	8.21673	3.5894e-18
shared	BLCA	Hypomethylated	SMAD3	35	18.2251	9.70516	8.43984e-18
shared	BLCA	Hypomethylated	ESR1	65	18.0389	8.80396	1.25254e-17
shared	BLCA	Hypomethylated	FOXA1	57	17.1662	7.3791	8.75968e-17
shared	BLCA	Hypomethylated	SPI1	57	16.8967	7.25616	1.57989e-16
shared	BLCA	Hypomethylated	SUH	35	16.129	8.20126	8.25263e-16
shared	BLCA	Hypomethylated	ATF3	27	16.0365	10.6538	9.9429e-16
shared	BLCA	Hypomethylated	MYB	38	15.7319	7.45665	1.9051e-15
shared	BLCA	Hypomethylated	TEAD1	23	15.6891	12.7411	2.0511e-15
shared	BLCA	Hypomethylated	HTF4	44	15.4588	6.72805	3.40221e-15
shared	BLCA	Hypomethylated	FLI1	51	15.0004	6.29121	9.33149e-15
shared	BLCA	Hypomethylated	FOXM1	39	14.1962	6.49833	5.3389e-14
shared	BLCA	Hypomethylated	STAT1	33	13.8963	7.12234	1.02323e-13
shared	BLCA	Hypomethylated	CEBPB	27	13.7012	8.43379	1.54304e-13
shared	BLCA	Hypomethylated	TEAD4	21	13.5781	11.3216	2.01086e-13
shared	BLCA	Hypomethylated	TF7L2	26	12.9619	8.12662	7.60491e-13
shared	BLCA	Hypomethylated	GATA3	30	12.4642	6.74482	2.3139e-12
shared	BLCA	Hypomethylated	KLF5	34	12.1118	5.93494	5.12441e-12
shared	BLCA	Hypomethylated	ANDR	58	11.7839	5.18112	1.07294e-11
shared	BLCA	Hypomethylated	KMT2B	32	11.4972	5.84373	2.01224e-11
shared	BLCA	Hypomethylated	TFAP4	20	11.4805	9.2348	2.05953e-11
shared	BLCA	Hypomethylated	ETS1	39	10.6453	4.83001	1.34789e-10
shared	BLCA	Hypomethylated	FOSL2	11	10.5963	21.3281	1.4875e-10
shared	BLCA	Hypomethylated	AP2C	35	10.499	5.02421	1.83467e-10
shared	BLCA	Hypomethylated	CEBPA	19	10.4625	8.56024	1.96795e-10
shared	BLCA	Hypomethylated	CTCF	57	10.2905	4.58039	2.80755e-10
shared	BLCA	Hypomethylated	ERG	33	10.0913	4.99591	4.38228e-10
shared	BLCA	Hypomethylated	GABPA	35	9.96816	4.77746	5.74369e-10
shared	BLCA	Hypomethylated	HNF4A	24	9.805	6.14079	8.15099e-10
shared	BLCA	Hypomethylated	CREB1	36	9.48328	4.49739	1.66754e-09
shared	BLCA	Hypomethylated	GATA1	38	9.41929	4.36644	1.9087e-09
shared	BLCA	Hypomethylated	BCL6	34	9.12705	4.46516	3.65188e-09
shared	BLCA	Hypomethylated	P63	25	9.07523	5.42945	4.06621e-09
shared	BLCA	Hypomethylated	VDR	23	8.95119	5.72987	5.28608e-09
shared	BLCA	Hypomethylated	RXRA	26	8.72428	5.05109	8.81208e-09
shared	BLCA	Hypomethylated	NCOR1	24	8.6257	5.30634	1.09334e-08
shared	BLCA	Hypomethylated	IRF1	21	7.88811	5.36929	5.65726e-08
shared	BLCA	Hypomethylated	PRGR	33	7.64701	3.87887	9.75226e-08
shared	BLCA	Hypomethylated	ELF1	29	7.51738	4.0808	1.28732e-07
shared	BLCA	Hypomethylated	LYL1	9	7.30894	14.0358	2.03831e-07
shared	BLCA	Hypomethylated	TAL1	31	6.99822	3.71011	4.04596e-07
shared	BLCA	Hypomethylated	GATA2	23	6.93451	4.37778	4.63971e-07
shared	BLCA	Hypomethylated	ZN143	20	6.58343	4.60389	1.02145e-06
shared	BLCA	Hypomethylated	AP2A	15	6.14344	5.45976	2.71001e-06
shared	BLCA	Hypomethylated	E2F1	38	6.06196	3.09699	3.21042e-06
shared	BLCA	Hypomethylated	TBX21	11	5.82984	7.1085	5.33459e-06
shared	BLCA	Hypomethylated	GATA6	18	5.77536	4.37061	5.99494e-06
shared	BLCA	Hypomethylated	KDM5B	29	5.75951	3.2809	6.1641e-06
shared	BLCA	Hypomethylated	ETV1	21	5.30411	3.63627	1.7371e-05
shared	BLCA	Hypomethylated	NRF1	23	5.30213	3.44906	1.7371e-05
shared	BLCA	Hypomethylated	TYY1	27	5.04456	3.06864	3.06548e-05
shared	BLCA	Hypomethylated	NFYA	21	4.95349	3.43281	3.74962e-05
shared	BLCA	Hypomethylated	FOXP1	16	4.94868	4.09873	3.76062e-05
shared	BLCA	Hypomethylated	PPARG	18	4.85611	3.70917	4.61646e-05
shared	BLCA	Hypomethylated	PO5F1	28	4.62418	2.84516	7.74975e-05
shared	BLCA	Hypomethylated	MYCN	19	4.27183	3.2216	0.000171713
shared	BLCA	Hypomethylated	RARA	13	4.23937	4.11769	0.000183605
shared	BLCA	Hypomethylated	EGR2	9	4.07675	5.48709	0.000264942
shared	BLCA	Hypomethylated	REST	15	3.99022	3.51035	0.000313702
shared	BLCA	Hypomethylated	TBP	17	3.86936	3.16901	0.000411289
shared	BLCA	Hypomethylated	STA5A	8	3.67378	5.42607	0.000635825
shared	BLCA	Hypomethylated	SOX2	19	3.59334	2.82624	0.000759668
shared	BLCA	Hypomethylated	E2F4	10	3.33497	3.96449	0.00134789
shared	BLCA	Hypomethylated	TFE2	6	3.30174	6.46209	0.00144481
shared	BLCA	Hypomethylated	KDM5A	11	3.22018	3.56703	0.00171911
shared	BLCA	Hypomethylated	ZBT17	11	3.18498	3.53052	0.00185138
shared	BLCA	Hypomethylated	SMAD1	10	3.17846	3.77716	0.0018538
shared	BLCA	Hypomethylated	GATA4	8	3.15331	4.50434	0.00193796
shared	BLCA	Hypomethylated	MYBB	3	3.00707	16.2654	0.00266895
shared	BLCA	Hypomethylated	BACH2	5	2.72916	6.06428	0.00494709
shared	BLCA	Hypomethylated	ELK4	7	2.68868	4.22768	0.0053956
shared	BLCA	Hypomethylated	HIF1A	12	2.64617	2.85363	0.00591257
shared	BLCA	Hypomethylated	ASCL1	9	2.61934	3.38284	0.00621017
shared	BLCA	Hypomethylated	NCOA1	5	2.56778	5.55685	0.0069062
shared	BLCA	Hypomethylated	NFE2	7	2.43396	3.79112	0.00934043
shared	BLCA	Hypomethylated	NR2C2	6	2.37738	4.20303	0.0104466
shared	BLCA	Hypomethylated	FOXA2	8	2.24722	3.17965	0.0136026
shared	BLCA	Hypomethylated	OTX2	2	2.23924	18.3525	0.0137745
shared	BLCA	Hypomethylated	NANOG	11	2.19839	2.5949	0.0149589
shared	BLCA	Hypomethylated	BMAL1	4	2.13713	5.48673	0.0170295
shared	BLCA	Hypomethylated	SP1	33	2.00487	1.75928	0.0225789
shared	BLCA	Hypomethylated	PRDM1	2	1.84	11.3052	0.0324632
shared	BLCA	Hypomethylated	KLF1	4	1.72297	4.11089	0.0413729
shared	BLCA	Hypomethylated	SMAD4	7	1.69382	2.69566	0.0437795
shared	BLCA	Hypomethylated	ZFX	8	1.51632	2.31025	0.0638648
shared	BLCA	Hypomethylated	KDM5C	5	1.39099	2.76764	0.0822919
shared	BLCA	Hypomethylated	NFKB1	2	1.23648	5.26471	0.115183
shared	BLCA	Hypomethylated	ERR1	5	1.23351	2.48903	0.115417
shared	BLCA	Hypomethylated	ESR2	3	1.0455	2.90805	0.167473
shared	BLCA	Hypomethylated	STAT3	3	1.0336	2.87262	0.170584
shared	BLCA	Hypomethylated	NCOR2	2	0.937003	3.49893	0.207079
shared	BLCA	Hypomethylated	DUX4	1	0.868061	6.9621	0.239015
shared	BLCA	Hypomethylated	MEIS1	1	0.864967	6.90605	0.239695
shared	BLCA	Hypomethylated	MITF	4	0.822125	1.99676	0.261197
shared	BLCA	Hypomethylated	IKZF1	3	0.808428	2.2546	0.268434
shared	BLCA	Hypomethylated	EPAS1	1	0.783661	5.63349	0.280649
shared	BLCA	Hypomethylated	ARNT	1	0.781197	5.59848	0.28108
shared	BLCA	Hypomethylated	LEF1	2	0.768752	2.7377	0.28806
shared	BLCA	Hypomethylated	HSF1	5	0.734062	1.70092	0.306961
shared	BLCA	Hypomethylated	KLF4	4	0.684726	1.74745	0.339763
shared	BLCA	Hypomethylated	MAF	3	0.638008	1.84414	0.373864
shared	BLCA	Hypomethylated	IRF2	1	0.617602	3.66564	0.382116
shared	BLCA	Hypomethylated	SMAD2	2	0.459196	1.6478	0.52944
shared	BLCA	Hypomethylated	SIX2	4	0.458662	1.36117	0.52944
shared	BLCA	Hypomethylated	FOXK1	1	0.450925	2.31183	0.536967
shared	BLCA	Hypomethylated	NKX31	1	0.428453	2.1651	0.560642
shared	BLCA	Hypomethylated	UBF1	1	0.363998	1.78172	0.623734
shared	BLCA	Hypomethylated	KMT2A	4	0.330303	1.1479	0.667032
shared	BLCA	Hypermethylated	NANOG	3	0.724349	2.12247	1
shared	BLCA	Hypermethylated	COE1	1	0.667034	4.27176	1
shared	BLCA	Hypermethylated	SOX2	3	0.314535	1.18305	1
shared	BLCA	Hypermethylated	MITF	1	0.308313	1.51716	1
shared	BLCA	Hypermethylated	P63	2	0.21632	0.994535	1
shared	BLCA	Hypermethylated	HSF1	1	0.199246	1.02037	1
shared	BLCA	Hypermethylated	GATA2	2	0.182254	0.903399	1
shared	BLCA	Hypermethylated	PO5F1	3	0.0934408	0.688864	1
shared	BLCA	Hypermethylated	PPARG	1	0.0658929	0.510677	1
shared	BLCA	Hypermethylated	SMAD3	1	0.0626515	0.498313	1
shared	BLCA	Hypermethylated	GATA3	1	0.0500208	0.449106	1
shared	BLCA	Hypermethylated	KLF5	1	0.0209764	0.320882	1
shared	BLCA	Hypermethylated	PRGR	1	0.00576728	0.220836	1
shared	BLCA	Hypermethylated	ESR1	4	0.005298	0.36915	1
shared	BLCA	Hypermethylated	GATA1	1	0.00324949	0.192912	1
shared	BLCA	Hypermethylated	TF65	2	0.00182266	0.23868	1
shared	BLCA	Hypermethylated	P53	1	0.00155276	0.165261	1
shared	BLCA	Hypermethylated	ANDR	3	0.000965831	0.256214	1
shared	BLCA	Hypermethylated	FLI1	1	0.000712786	0.142983	1
shared	BLCA	Hypermethylated	SPI1	1	0.000207765	0.117005	1
shared	BLCA	Hypermethylated	CTCF	2	8.52806e-05	0.153925	1
shared	BLCA	Hypermethylated	MAX	1	5.92827e-05	0.0979976	1
shared	BLCA	Hypermethylated	AP2A	0	0	0	1
shared	BLCA	Hypermethylated	AP2C	0	0	0	1
shared	BLCA	Hypermethylated	ARNT	0	0	0	1
shared	BLCA	Hypermethylated	ASCL1	0	0	0	1
shared	BLCA	Hypermethylated	ATF3	0	0	0	1
shared	BLCA	Hypermethylated	ATF4	0	0	0	1
shared	BLCA	Hypermethylated	ATRX	0	0	0	1
shared	BLCA	Hypermethylated	BACH2	0	0	0	1
shared	BLCA	Hypermethylated	BCL6	0	0	0	1
shared	BLCA	Hypermethylated	BMAL1	0	0	0	1
shared	BLCA	Hypermethylated	CDX2	0	0	0	1
shared	BLCA	Hypermethylated	CEBPA	0	0	0	1
shared	BLCA	Hypermethylated	CEBPB	0	0	0	1
shared	BLCA	Hypermethylated	COT2	0	0	0	1
shared	BLCA	Hypermethylated	CREB1	0	0	0	1
shared	BLCA	Hypermethylated	DUX4	0	0	0	1
shared	BLCA	Hypermethylated	E2F1	0	0	0	1
shared	BLCA	Hypermethylated	E2F4	0	0	0	1
shared	BLCA	Hypermethylated	EGR2	0	0	0	1
shared	BLCA	Hypermethylated	ELF1	0	0	0	1
shared	BLCA	Hypermethylated	ELK4	0	0	0	1
shared	BLCA	Hypermethylated	EPAS1	0	0	0	1
shared	BLCA	Hypermethylated	ERG	0	0	0	1
shared	BLCA	Hypermethylated	ERR1	0	0	0	1
shared	BLCA	Hypermethylated	ESR2	0	0	0	1
shared	BLCA	Hypermethylated	ETS1	0	0	0	1
shared	BLCA	Hypermethylated	ETV1	0	0	0	1
shared	BLCA	Hypermethylated	FOSL2	0	0	0	1
shared	BLCA	Hypermethylated	FOS	0	0	0	1
shared	BLCA	Hypermethylated	FOXA1	0	0	0	1
shared	BLCA	Hypermethylated	FOXA2	0	0	0	1
shared	BLCA	Hypermethylated	FOXK1	0	0	0	1
shared	BLCA	Hypermethylated	FOXM1	0	0	0	1
shared	BLCA	Hypermethylated	FOXO1	0	0	0	1
shared	BLCA	Hypermethylated	FOXP1	0	0	0	1
shared	BLCA	Hypermethylated	GABPA	0	0	0	1
shared	BLCA	Hypermethylated	GATA4	0	0	0	1
shared	BLCA	Hypermethylated	GATA6	0	0	0	1
shared	BLCA	Hypermethylated	GCR	0	0	0	1
shared	BLCA	Hypermethylated	GRHL2	0	0	0	1
shared	BLCA	Hypermethylated	HIF1A	0	0	0	1
shared	BLCA	Hypermethylated	HNF4A	0	0	0	1
shared	BLCA	Hypermethylated	HTF4	0	0	0	1
shared	BLCA	Hypermethylated	IKZF1	0	0	0	1
shared	BLCA	Hypermethylated	IRF1	0	0	0	1
shared	BLCA	Hypermethylated	IRF2	0	0	0	1
shared	BLCA	Hypermethylated	JARD2	0	0	0	1
shared	BLCA	Hypermethylated	JUND	0	0	0	1
shared	BLCA	Hypermethylated	JUN	0	0	0	1
shared	BLCA	Hypermethylated	KDM5A	0	0	0	1
shared	BLCA	Hypermethylated	KDM5B	0	0	0	1
shared	BLCA	Hypermethylated	KDM5C	0	0	0	1
shared	BLCA	Hypermethylated	KLF1	0	0	0	1
shared	BLCA	Hypermethylated	KLF4	0	0	0	1
shared	BLCA	Hypermethylated	KLF6	0	0	0	1
shared	BLCA	Hypermethylated	KMT2A	0	0	0	1
shared	BLCA	Hypermethylated	KMT2B	0	0	0	1
shared	BLCA	Hypermethylated	LEF1	0	0	0	1
shared	BLCA	Hypermethylated	LYL1	0	0	0	1
shared	BLCA	Hypermethylated	MAF	0	0	0	1
shared	BLCA	Hypermethylated	MEIS1	0	0	0	1
shared	BLCA	Hypermethylated	MYBB	0	0	0	1
shared	BLCA	Hypermethylated	MYB	0	0	0	1
shared	BLCA	Hypermethylated	MYCN	0	0	0	1
shared	BLCA	Hypermethylated	MYC	0	0	0	1
shared	BLCA	Hypermethylated	NCOA1	0	0	0	1
shared	BLCA	Hypermethylated	NCOR1	0	0	0	1
shared	BLCA	Hypermethylated	NCOR2	0	0	0	1
shared	BLCA	Hypermethylated	NFE2	0	0	0	1
shared	BLCA	Hypermethylated	NFKB1	0	0	0	1
shared	BLCA	Hypermethylated	NFYA	0	0	0	1
shared	BLCA	Hypermethylated	NKX21	0	0	0	1
shared	BLCA	Hypermethylated	NKX31	0	0	0	1
shared	BLCA	Hypermethylated	NR1H3	0	0	0	1
shared	BLCA	Hypermethylated	NR2C2	0	0	0	1
shared	BLCA	Hypermethylated	NRF1	0	0	0	1
shared	BLCA	Hypermethylated	OTX2	0	0	0	1
shared	BLCA	Hypermethylated	PAX5	0	0	0	1
shared	BLCA	Hypermethylated	PAX6	0	0	0	1
shared	BLCA	Hypermethylated	PDX1	0	0	0	1
shared	BLCA	Hypermethylated	PO2F1	0	0	0	1
shared	BLCA	Hypermethylated	PRD14	0	0	0	1
shared	BLCA	Hypermethylated	PRDM1	0	0	0	1
shared	BLCA	Hypermethylated	RARA	0	0	0	1
shared	BLCA	Hypermethylated	REST	0	0	0	1
shared	BLCA	Hypermethylated	RUNX1	0	0	0	1
shared	BLCA	Hypermethylated	RXRA	0	0	0	1
shared	BLCA	Hypermethylated	SIX2	0	0	0	1
shared	BLCA	Hypermethylated	SMAD1	0	0	0	1
shared	BLCA	Hypermethylated	SMAD2	0	0	0	1
shared	BLCA	Hypermethylated	SMAD4	0	0	0	1
shared	BLCA	Hypermethylated	SMRC1	0	0	0	1
shared	BLCA	Hypermethylated	SNPC4	0	0	0	1
shared	BLCA	Hypermethylated	SOX9	0	0	0	1
shared	BLCA	Hypermethylated	SP1	0	0	0	1
shared	BLCA	Hypermethylated	STA5A	0	0	0	1
shared	BLCA	Hypermethylated	STAT1	0	0	0	1
shared	BLCA	Hypermethylated	STAT3	0	0	0	1
shared	BLCA	Hypermethylated	STAT4	0	0	0	1
shared	BLCA	Hypermethylated	SUH	0	0	0	1
shared	BLCA	Hypermethylated	TAL1	0	0	0	1
shared	BLCA	Hypermethylated	TBP	0	0	0	1
shared	BLCA	Hypermethylated	TBX21	0	0	0	1
shared	BLCA	Hypermethylated	TEAD1	0	0	0	1
shared	BLCA	Hypermethylated	TEAD4	0	0	0	1
shared	BLCA	Hypermethylated	TF7L2	0	0	0	1
shared	BLCA	Hypermethylated	TFAP4	0	0	0	1
shared	BLCA	Hypermethylated	TFE2	0	0	0	1
shared	BLCA	Hypermethylated	TYY1	0	0	0	1
shared	BLCA	Hypermethylated	UBF1	0	0	0	1
shared	BLCA	Hypermethylated	VDR	0	0	0	1
shared	BLCA	Hypermethylated	ZBT17	0	0	0	1
shared	BLCA	Hypermethylated	ZFX	0	0	0	1
shared	BLCA	Hypermethylated	ZN143	0	0	0	1
shared	BLCA	Hypermethylated	ZN263	0	0	0	1
shared	BLCA	Hypomethylated	PAX5	1	0.0803484	0.563116	1
shared	BLCA	Hypomethylated	JARD2	2	0.000637868	0.21883	1
shared	BLCA	Hypomethylated	ATF4	0	0	0	1
shared	BLCA	Hypomethylated	ATRX	0	0	0	1
shared	BLCA	Hypomethylated	CDX2	0	0	0	1
shared	BLCA	Hypomethylated	COE1	0	0	0	1
shared	BLCA	Hypomethylated	COT2	0	0	0	1
shared	BLCA	Hypomethylated	FOXO1	0	0	0	1
shared	BLCA	Hypomethylated	KLF6	0	0	0	1
shared	BLCA	Hypomethylated	NR1H3	0	0	0	1
shared	BLCA	Hypomethylated	PAX6	0	0	0	1
shared	BLCA	Hypomethylated	PDX1	0	0	0	1
shared	BLCA	Hypomethylated	PO2F1	0	0	0	1
shared	BLCA	Hypomethylated	PRD14	0	0	0	1
shared	BLCA	Hypomethylated	SMRC1	0	0	0	1
shared	BLCA	Hypomethylated	SNPC4	0	0	0	1
shared	BLCA	Hypomethylated	SOX9	0	0	0	1
shared	BLCA	Hypomethylated	STAT4	0	0	0	1
shared	BLCA	Hypomethylated	ZN263	0	0	0	1
femaleAmplifier	COAD	Hypermethylated	GATA6	33	9.06029	3.94857	1.23353e-08
femaleAmplifier	COAD	Hypermethylated	HNF4A	26	4.87808	2.80889	0.000123684
femaleAmplifier	COAD	Hypermethylated	GRHL2	22	4.53647	2.92353	0.000254259
femaleAmplifier	COAD	Hypermethylated	FOXA1	60	3.40479	1.7759	0.00293158
femaleAmplifier	COAD	Hypermethylated	GATA3	26	3.22774	2.17806	0.00412331
femaleAmplifier	COAD	Hypomethylated	MEIS1	3	2.50614	10.6939	0.0128145
femaleAmplifier	COAD	Hypermethylated	FOXA2	13	2.52763	2.55665	0.0196706
femaleAmplifier	COAD	Hypomethylated	SPI1	54	2.19718	1.55358	0.0253413
femaleAmplifier	COAD	Hypomethylated	COT2	5	2.07792	4.15621	0.0330288
femaleAmplifier	COAD	Hypermethylated	JUND	14	2.21616	2.25854	0.0378563
femaleAmplifier	COAD	Hypomethylated	JARD2	26	1.92728	1.70663	0.0445796
femaleAmplifier	COAD	Hypermethylated	PRGR	36	2.00494	1.60962	0.0597577
femaleAmplifier	COAD	Hypomethylated	CEBPB	15	1.41672	1.7265	0.135727
femaleAmplifier	COAD	Hypermethylated	TEAD4	10	1.58491	2.11349	0.140642
femaleAmplifier	COAD	Hypermethylated	MYC	72	1.57181	1.37526	0.143069
femaleAmplifier	COAD	Hypermethylated	GATA2	21	1.55258	1.64425	0.147489
femaleAmplifier	COAD	Hypermethylated	AP2C	30	1.53148	1.51635	0.150457
femaleAmplifier	COAD	Hypomethylated	CEBPA	10	1.27726	1.85826	0.175048
femaleAmplifier	COAD	Hypermethylated	KLF5	24	1.2127	1.45729	0.28298
femaleAmplifier	COAD	Hypermethylated	SIX2	10	1.07416	1.69248	0.368597
femaleAmplifier	COAD	Hypomethylated	FOSL2	3	0.922587	2.53368	0.368755
femaleAmplifier	COAD	Hypomethylated	JUN	17	0.919999	1.40571	0.368755
femaleAmplifier	COAD	Hypomethylated	FOS	12	0.880916	1.47613	0.397546
femaleAmplifier	COAD	Hypomethylated	RARA	10	0.816649	1.48491	0.451001
femaleAmplifier	COAD	Hypermethylated	TF7L2	13	0.973985	1.51331	0.454555
femaleAmplifier	COAD	Hypomethylated	ATF3	10	0.750266	1.43091	0.514384
femaleAmplifier	COAD	Hypermethylated	TEAD1	8	0.885697	1.6313	0.540144
femaleAmplifier	COAD	Hypermethylated	NKX21	12	0.812541	1.42746	0.626584
femaleAmplifier	COAD	Hypomethylated	TEAD1	7	0.653512	1.44588	0.638254
femaleAmplifier	COAD	Hypermethylated	GCR	27	0.75628	1.24523	0.692673
femaleAmplifier	COAD	Hypermethylated	NFKB1	2	0.74527	2.62415	0.701918
femaleAmplifier	COAD	Hypermethylated	GATA4	6	0.74225	1.60526	0.701918
femaleAmplifier	COAD	Hypomethylated	SIX2	8	0.608122	1.36264	0.703651
femaleAmplifier	COAD	Hypermethylated	ATF3	10	0.716358	1.40284	0.73124
femaleAmplifier	COAD	Hypermethylated	CEBPB	12	0.67118	1.32605	0.782427
femaleAmplifier	COAD	Hypomethylated	TFE2	3	0.518188	1.56849	0.830926
femaleAmplifier	COAD	Hypermethylated	FOS	11	0.636665	1.31742	0.83965
femaleAmplifier	COAD	Hypermethylated	ERR1	6	0.629215	1.46774	0.846685
femaleAmplifier	COAD	Hypomethylated	SMAD1	7	0.4803	1.25824	0.877426
femaleAmplifier	COAD	Hypermethylated	P63	15	0.595704	1.23697	0.898969
femaleAmplifier	COAD	Hypermethylated	MEIS1	1	0.595639	3.44064	0.898969
femaleAmplifier	COAD	Hypomethylated	FLI1	36	0.451848	1.09045	0.916739
femaleAmplifier	COAD	Hypomethylated	MITF	5	0.439409	1.27073	0.916739
femaleAmplifier	COAD	Hypermethylated	TBX21	5	0.573038	1.45637	0.923118
femaleAmplifier	COAD	Hypermethylated	JUN	15	0.536887	1.19831	0.994886
femaleAmplifier	COAD	Hypermethylated	AP2A	8	0.5146	1.27024	1
femaleAmplifier	COAD	Hypermethylated	KLF4	6	0.514033	1.32821	1
femaleAmplifier	COAD	Hypermethylated	NCOR2	2	0.497376	1.75449	1
femaleAmplifier	COAD	Hypermethylated	FOSL2	2	0.461793	1.64637	1
femaleAmplifier	COAD	Hypermethylated	ASCL1	7	0.459293	1.23492	1
femaleAmplifier	COAD	Hypermethylated	TF65	43	0.434673	1.07665	1
femaleAmplifier	COAD	Hypermethylated	SMAD3	13	0.401477	1.11356	1
femaleAmplifier	COAD	Hypermethylated	IRF2	1	0.38059	1.8673	1
femaleAmplifier	COAD	Hypermethylated	TFAP4	6	0.333416	1.10455	1
femaleAmplifier	COAD	Hypermethylated	ESR1	53	0.323169	1.02307	1
femaleAmplifier	COAD	Hypermethylated	ZBT17	7	0.284307	1.0339	1
femaleAmplifier	COAD	Hypermethylated	ANDR	53	0.247948	0.985112	1
femaleAmplifier	COAD	Hypermethylated	TFE2	2	0.232537	1.0194	1
femaleAmplifier	COAD	Hypermethylated	PDX1	1	0.220212	1.08861	1
femaleAmplifier	COAD	Hypermethylated	STA5A	3	0.214989	0.95501	1
femaleAmplifier	COAD	Hypermethylated	ESR2	2	0.209681	0.961126	1
femaleAmplifier	COAD	Hypermethylated	PRD14	2	0.179978	0.885556	1
femaleAmplifier	COAD	Hypermethylated	SMAD1	5	0.167327	0.870113	1
femaleAmplifier	COAD	Hypermethylated	SMAD2	2	0.157372	0.827773	1
femaleAmplifier	COAD	Hypermethylated	GATA1	25	0.155375	0.910024	1
femaleAmplifier	COAD	Hypermethylated	VDR	9	0.146632	0.861763	1
femaleAmplifier	COAD	Hypermethylated	COT2	1	0.144395	0.793823	1
femaleAmplifier	COAD	Hypermethylated	NFE2	3	0.126525	0.768987	1
femaleAmplifier	COAD	Hypermethylated	MITF	3	0.113019	0.73839	1
femaleAmplifier	COAD	Hypermethylated	BMAL1	1	0.111435	0.674163	1
femaleAmplifier	COAD	Hypermethylated	SMAD4	4	0.102329	0.735857	1
femaleAmplifier	COAD	Hypermethylated	MAX	41	0.0902124	0.865251	1
femaleAmplifier	COAD	Hypermethylated	PPARG	9	0.0868799	0.770328	1
femaleAmplifier	COAD	Hypermethylated	BACH2	1	0.0845444	0.577809	1
femaleAmplifier	COAD	Hypermethylated	ERG	16	0.0828731	0.805923	1
femaleAmplifier	COAD	Hypermethylated	MAF	2	0.0779883	0.614277	1
femaleAmplifier	COAD	Hypermethylated	NCOA1	1	0.0728349	0.535507	1
femaleAmplifier	COAD	Hypermethylated	JARD2	13	0.0655057	0.761936	1
femaleAmplifier	COAD	Hypermethylated	KLF1	1	0.0649234	0.50655	1
femaleAmplifier	COAD	Hypermethylated	EGR2	2	0.060898	0.562627	1
femaleAmplifier	COAD	Hypermethylated	STAT3	1	0.0570031	0.477089	1
femaleAmplifier	COAD	Hypermethylated	SUH	10	0.0550956	0.718063	1
femaleAmplifier	COAD	Hypermethylated	KDM5C	2	0.0534245	0.538626	1
femaleAmplifier	COAD	Hypermethylated	NANOG	6	0.0403317	0.626814	1
femaleAmplifier	COAD	Hypermethylated	RARA	4	0.0347696	0.560058	1
femaleAmplifier	COAD	Hypermethylated	SPI1	33	0.0347049	0.773825	1
femaleAmplifier	COAD	Hypermethylated	SOX2	11	0.031923	0.669933	1
femaleAmplifier	COAD	Hypermethylated	CTCF	47	0.0294059	0.783325	1
femaleAmplifier	COAD	Hypermethylated	FOXM1	14	0.0242144	0.671535	1
femaleAmplifier	COAD	Hypermethylated	STAT1	9	0.0226734	0.61625	1
femaleAmplifier	COAD	Hypermethylated	P53	23	0.0222195	0.713603	1
femaleAmplifier	COAD	Hypermethylated	NR2C2	1	0.0221825	0.332326	1
femaleAmplifier	COAD	Hypermethylated	PO5F1	18	0.0190845	0.679527	1
femaleAmplifier	COAD	Hypermethylated	TAL1	16	0.018351	0.664543	1
femaleAmplifier	COAD	Hypermethylated	KMT2B	10	0.0157959	0.599743	1
femaleAmplifier	COAD	Hypermethylated	KMT2A	3	0.0142192	0.431528	1
femaleAmplifier	COAD	Hypermethylated	PAX5	1	0.0134685	0.285316	1
femaleAmplifier	COAD	Hypermethylated	RUNX1	34	0.0108351	0.70317	1
femaleAmplifier	COAD	Hypermethylated	CEBPA	2	0.00958093	0.345954	1
femaleAmplifier	COAD	Hypermethylated	MYB	10	0.00910976	0.561626	1
femaleAmplifier	COAD	Hypermethylated	HSF1	2	0.0077199	0.331217	1
femaleAmplifier	COAD	Hypermethylated	HIF1A	4	0.00731977	0.42263	1
femaleAmplifier	COAD	Hypermethylated	SP1	33	0.00629419	0.673236	1
femaleAmplifier	COAD	Hypermethylated	RXRA	6	0.00245801	0.420088	1
femaleAmplifier	COAD	Hypermethylated	E2F4	1	0.00172528	0.178807	1
femaleAmplifier	COAD	Hypermethylated	IRF1	3	0.00127539	0.29654	1
femaleAmplifier	COAD	Hypermethylated	BCL6	11	0.000776965	0.457828	1
femaleAmplifier	COAD	Hypermethylated	MYCN	5	0.000678853	0.343204	1
femaleAmplifier	COAD	Hypermethylated	KDM5A	1	0.000483384	0.144817	1
femaleAmplifier	COAD	Hypermethylated	FOXP1	2	0.000450436	0.213372	1
femaleAmplifier	COAD	Hypermethylated	GABPA	10	0.000382227	0.420952	1
femaleAmplifier	COAD	Hypermethylated	E2F1	20	0.000310324	0.506363	1
femaleAmplifier	COAD	Hypermethylated	ZFX	1	0.000309482	0.135721	1
femaleAmplifier	COAD	Hypermethylated	TYY1	10	0.000308869	0.414384	1
femaleAmplifier	COAD	Hypermethylated	REST	2	0.000230694	0.197045	1
femaleAmplifier	COAD	Hypermethylated	CREB1	11	0.000225647	0.418261	1
femaleAmplifier	COAD	Hypermethylated	HTF4	9	2.58838e-05	0.338042	1
femaleAmplifier	COAD	Hypermethylated	TBP	2	1.91655e-05	0.153513	1
femaleAmplifier	COAD	Hypermethylated	NRF1	4	1.72162e-05	0.226149	1
femaleAmplifier	COAD	Hypermethylated	NFYA	3	1.41151e-05	0.190329	1
femaleAmplifier	COAD	Hypermethylated	ZN143	1	8.04226e-06	0.0892367	1
femaleAmplifier	COAD	Hypermethylated	ETS1	9	6.90147e-06	0.313001	1
femaleAmplifier	COAD	Hypermethylated	FLI1	15	6.89577e-06	0.380491	1
femaleAmplifier	COAD	Hypermethylated	ETV1	2	3.59983e-06	0.133664	1
femaleAmplifier	COAD	Hypermethylated	NCOR1	1	2.35768e-06	0.0798973	1
femaleAmplifier	COAD	Hypermethylated	ELF1	4	1.34218e-06	0.190332	1
femaleAmplifier	COAD	Hypermethylated	KDM5B	4	2.5844e-08	0.153004	1
femaleAmplifier	COAD	Hypermethylated	ARNT	0	0	0	1
femaleAmplifier	COAD	Hypermethylated	ATF4	0	0	0	1
femaleAmplifier	COAD	Hypermethylated	ATRX	0	0	0	1
femaleAmplifier	COAD	Hypermethylated	CDX2	0	0	0	1
femaleAmplifier	COAD	Hypermethylated	COE1	0	0	0	1
femaleAmplifier	COAD	Hypermethylated	DUX4	0	0	0	1
femaleAmplifier	COAD	Hypermethylated	ELK4	0	0	0	1
femaleAmplifier	COAD	Hypermethylated	EPAS1	0	0	0	1
femaleAmplifier	COAD	Hypermethylated	FOXK1	0	0	0	1
femaleAmplifier	COAD	Hypermethylated	FOXO1	0	0	0	1
femaleAmplifier	COAD	Hypermethylated	IKZF1	0	0	0	1
femaleAmplifier	COAD	Hypermethylated	KLF6	0	0	0	1
femaleAmplifier	COAD	Hypermethylated	LEF1	0	0	0	1
femaleAmplifier	COAD	Hypermethylated	LYL1	0	0	0	1
femaleAmplifier	COAD	Hypermethylated	MYBB	0	0	0	1
femaleAmplifier	COAD	Hypermethylated	NKX31	0	0	0	1
femaleAmplifier	COAD	Hypermethylated	NR1H3	0	0	0	1
femaleAmplifier	COAD	Hypermethylated	OTX2	0	0	0	1
femaleAmplifier	COAD	Hypermethylated	PAX6	0	0	0	1
femaleAmplifier	COAD	Hypermethylated	PO2F1	0	0	0	1
femaleAmplifier	COAD	Hypermethylated	PRDM1	0	0	0	1
femaleAmplifier	COAD	Hypermethylated	SMRC1	0	0	0	1
femaleAmplifier	COAD	Hypermethylated	SNPC4	0	0	0	1
femaleAmplifier	COAD	Hypermethylated	SOX9	0	0	0	1
femaleAmplifier	COAD	Hypermethylated	STAT4	0	0	0	1
femaleAmplifier	COAD	Hypermethylated	UBF1	0	0	0	1
femaleAmplifier	COAD	Hypermethylated	ZN263	0	0	0	1
femaleAmplifier	COAD	Hypomethylated	LYL1	2	0.382553	1.41773	1
femaleAmplifier	COAD	Hypomethylated	FOXA2	6	0.367933	1.14843	1
femaleAmplifier	COAD	Hypomethylated	ESR1	52	0.320954	1.02235	1
femaleAmplifier	COAD	Hypomethylated	SMAD3	12	0.310672	1.04177	1
femaleAmplifier	COAD	Hypomethylated	CTCF	55	0.301804	1.01287	1
femaleAmplifier	COAD	Hypomethylated	NFKB1	1	0.275146	1.32761	1
femaleAmplifier	COAD	Hypomethylated	PRGR	24	0.275145	1.00175	1
femaleAmplifier	COAD	Hypomethylated	FOXK1	1	0.250214	1.21608	1
femaleAmplifier	COAD	Hypomethylated	AP2A	6	0.223879	0.958703	1
femaleAmplifier	COAD	Hypomethylated	ESR2	2	0.216833	0.979385	1
femaleAmplifier	COAD	Hypomethylated	GCR	21	0.203667	0.947451	1
femaleAmplifier	COAD	Hypomethylated	UBF1	1	0.181944	0.935621	1
femaleAmplifier	COAD	Hypomethylated	GATA2	12	0.169415	0.901119	1
femaleAmplifier	COAD	Hypomethylated	HSF1	5	0.161497	0.860362	1
femaleAmplifier	COAD	Hypomethylated	PPARG	10	0.156225	0.87881	1
femaleAmplifier	COAD	Hypomethylated	RUNX1	41	0.150741	0.919295	1
femaleAmplifier	COAD	Hypomethylated	NFE2	3	0.133149	0.78369	1
femaleAmplifier	COAD	Hypomethylated	IKZF1	2	0.131507	0.760793	1
femaleAmplifier	COAD	Hypomethylated	TAL1	20	0.125634	0.872347	1
femaleAmplifier	COAD	Hypomethylated	COE1	1	0.11868	0.700237	1
femaleAmplifier	COAD	Hypomethylated	LEF1	1	0.118372	0.699128	1
femaleAmplifier	COAD	Hypomethylated	BMAL1	1	0.114972	0.686891	1
femaleAmplifier	COAD	Hypomethylated	JUND	5	0.113469	0.774754	1
femaleAmplifier	COAD	Hypomethylated	STA5A	2	0.0885613	0.644621	1
femaleAmplifier	COAD	Hypomethylated	BACH2	1	0.0875794	0.588717	1
femaleAmplifier	COAD	Hypomethylated	GATA3	10	0.0789158	0.764539	1
femaleAmplifier	COAD	Hypomethylated	P63	9	0.0641261	0.727208	1
femaleAmplifier	COAD	Hypomethylated	MYCN	10	0.0575293	0.72316	1
femaleAmplifier	COAD	Hypomethylated	HIF1A	6	0.0503829	0.654612	1
femaleAmplifier	COAD	Hypomethylated	PRD14	1	0.049441	0.448261	1
femaleAmplifier	COAD	Hypomethylated	ZN143	7	0.0467475	0.661816	1
femaleAmplifier	COAD	Hypomethylated	GATA1	21	0.0436338	0.758831	1
femaleAmplifier	COAD	Hypomethylated	SMAD2	1	0.0420135	0.419021	1
femaleAmplifier	COAD	Hypomethylated	HTF4	18	0.0378704	0.733412	1
femaleAmplifier	COAD	Hypomethylated	SOX2	11	0.0367769	0.683431	1
femaleAmplifier	COAD	Hypomethylated	NKX21	5	0.0322859	0.579146	1
femaleAmplifier	COAD	Hypomethylated	BCL6	16	0.0302063	0.703041	1
femaleAmplifier	COAD	Hypomethylated	P53	23	0.0277053	0.729238	1
femaleAmplifier	COAD	Hypomethylated	KLF4	2	0.0267798	0.439714	1
femaleAmplifier	COAD	Hypomethylated	TF65	32	0.0260941	0.751014	1
femaleAmplifier	COAD	Hypomethylated	PO5F1	18	0.0233272	0.693891	1
femaleAmplifier	COAD	Hypomethylated	MYC	49	0.0221924	0.767072	1
femaleAmplifier	COAD	Hypomethylated	GABPA	15	0.0207151	0.666374	1
femaleAmplifier	COAD	Hypomethylated	TEAD4	2	0.0201576	0.408938	1
femaleAmplifier	COAD	Hypomethylated	NANOG	5	0.0196605	0.529054	1
femaleAmplifier	COAD	Hypomethylated	GRHL2	4	0.0158141	0.479824	1
femaleAmplifier	COAD	Hypomethylated	ZBT17	3	0.0157329	0.440126	1
femaleAmplifier	COAD	Hypomethylated	KMT2A	3	0.0156706	0.439779	1
femaleAmplifier	COAD	Hypomethylated	ELK4	1	0.0143936	0.290801	1
femaleAmplifier	COAD	Hypomethylated	PAX5	1	0.0143769	0.290703	1
femaleAmplifier	COAD	Hypomethylated	GATA6	5	0.0141362	0.500853	1
femaleAmplifier	COAD	Hypomethylated	STAT1	8	0.0126502	0.554965	1
femaleAmplifier	COAD	Hypomethylated	TFAP4	2	0.0124502	0.365699	1
femaleAmplifier	COAD	Hypomethylated	KDM5C	1	0.0114574	0.27269	1
femaleAmplifier	COAD	Hypomethylated	TF7L2	4	0.0105157	0.447464	1
femaleAmplifier	COAD	Hypomethylated	ASCL1	2	0.00989165	0.348194	1
femaleAmplifier	COAD	Hypomethylated	NFYA	8	0.0094074	0.534385	1
femaleAmplifier	COAD	Hypomethylated	RXRA	7	0.00764129	0.502964	1
femaleAmplifier	COAD	Hypomethylated	ERR1	1	0.00714986	0.241354	1
femaleAmplifier	COAD	Hypomethylated	REST	4	0.00567623	0.406776	1
femaleAmplifier	COAD	Hypomethylated	MYB	9	0.00500576	0.512145	1
femaleAmplifier	COAD	Hypomethylated	AP2C	12	0.0045288	0.544774	1
femaleAmplifier	COAD	Hypomethylated	NCOR1	5	0.00394771	0.417755	1
femaleAmplifier	COAD	Hypomethylated	HNF4A	4	0.0034234	0.379016	1
femaleAmplifier	COAD	Hypomethylated	VDR	4	0.00335479	0.377991	1
femaleAmplifier	COAD	Hypomethylated	SP1	31	0.00325669	0.63727	1
femaleAmplifier	COAD	Hypomethylated	FOXP1	3	0.0027261	0.328237	1
femaleAmplifier	COAD	Hypomethylated	E2F4	1	0.0019106	0.182184	1
femaleAmplifier	COAD	Hypomethylated	NRF1	7	0.00121077	0.411332	1
femaleAmplifier	COAD	Hypomethylated	TBP	4	0.000772077	0.316902	1
femaleAmplifier	COAD	Hypomethylated	FOXM1	9	0.000695923	0.425919	1
femaleAmplifier	COAD	Hypomethylated	KDM5A	1	0.000547902	0.147553	1
femaleAmplifier	COAD	Hypomethylated	IRF1	2	0.000265555	0.200186	1
femaleAmplifier	COAD	Hypomethylated	ETS1	12	0.000263428	0.434292	1
femaleAmplifier	COAD	Hypomethylated	TYY1	9	0.000144057	0.377879	1
femaleAmplifier	COAD	Hypomethylated	FOXA1	22	9.72653e-05	0.485707	1
femaleAmplifier	COAD	Hypomethylated	E2F1	18	9.06779e-05	0.458925	1
femaleAmplifier	COAD	Hypomethylated	CREB1	9	3.56438e-05	0.344465	1
femaleAmplifier	COAD	Hypomethylated	MAX	25	3.48872e-05	0.476659	1
femaleAmplifier	COAD	Hypomethylated	ERG	6	3.24389e-05	0.288385	1
femaleAmplifier	COAD	Hypomethylated	ELF1	5	1.01209e-05	0.244065	1
femaleAmplifier	COAD	Hypomethylated	KLF5	4	9.38222e-06	0.216258	1
femaleAmplifier	COAD	Hypomethylated	SUH	2	5.97177e-06	0.139024	1
femaleAmplifier	COAD	Hypomethylated	KMT2B	3	4.77558e-06	0.175293	1
femaleAmplifier	COAD	Hypomethylated	ETV1	2	4.61858e-06	0.136204	1
femaleAmplifier	COAD	Hypomethylated	ANDR	27	7.41697e-07	0.414904	1
femaleAmplifier	COAD	Hypomethylated	KDM5B	5	2.60534e-07	0.196199	1
femaleAmplifier	COAD	Hypomethylated	ARNT	0	0	0	1
femaleAmplifier	COAD	Hypomethylated	ATF4	0	0	0	1
femaleAmplifier	COAD	Hypomethylated	ATRX	0	0	0	1
femaleAmplifier	COAD	Hypomethylated	CDX2	0	0	0	1
femaleAmplifier	COAD	Hypomethylated	DUX4	0	0	0	1
femaleAmplifier	COAD	Hypomethylated	EGR2	0	0	0	1
femaleAmplifier	COAD	Hypomethylated	EPAS1	0	0	0	1
femaleAmplifier	COAD	Hypomethylated	FOXO1	0	0	0	1
femaleAmplifier	COAD	Hypomethylated	GATA4	0	0	0	1
femaleAmplifier	COAD	Hypomethylated	IRF2	0	0	0	1
femaleAmplifier	COAD	Hypomethylated	KLF1	0	0	0	1
femaleAmplifier	COAD	Hypomethylated	KLF6	0	0	0	1
femaleAmplifier	COAD	Hypomethylated	MAF	0	0	0	1
femaleAmplifier	COAD	Hypomethylated	MYBB	0	0	0	1
femaleAmplifier	COAD	Hypomethylated	NCOA1	0	0	0	1
femaleAmplifier	COAD	Hypomethylated	NCOR2	0	0	0	1
femaleAmplifier	COAD	Hypomethylated	NKX31	0	0	0	1
femaleAmplifier	COAD	Hypomethylated	NR1H3	0	0	0	1
femaleAmplifier	COAD	Hypomethylated	NR2C2	0	0	0	1
femaleAmplifier	COAD	Hypomethylated	OTX2	0	0	0	1
femaleAmplifier	COAD	Hypomethylated	PAX6	0	0	0	1
femaleAmplifier	COAD	Hypomethylated	PDX1	0	0	0	1
femaleAmplifier	COAD	Hypomethylated	PO2F1	0	0	0	1
femaleAmplifier	COAD	Hypomethylated	PRDM1	0	0	0	1
femaleAmplifier	COAD	Hypomethylated	SMAD4	0	0	0	1
femaleAmplifier	COAD	Hypomethylated	SMRC1	0	0	0	1
femaleAmplifier	COAD	Hypomethylated	SNPC4	0	0	0	1
femaleAmplifier	COAD	Hypomethylated	SOX9	0	0	0	1
femaleAmplifier	COAD	Hypomethylated	STAT3	0	0	0	1
femaleAmplifier	COAD	Hypomethylated	STAT4	0	0	0	1
femaleAmplifier	COAD	Hypomethylated	TBX21	0	0	0	1
femaleAmplifier	COAD	Hypomethylated	ZFX	0	0	0	1
femaleAmplifier	COAD	Hypomethylated	ZN263	0	0	0	1
maleAmplifier	COAD	Hypomethylated	RUNX1	130	26.7358	4.69374	2.43628e-26
maleAmplifier	COAD	Hypomethylated	LYL1	26	21.3656	16.5152	5.06042e-21
maleAmplifier	COAD	Hypomethylated	SPI1	113	20.0808	3.79021	9.4786e-20
maleAmplifier	COAD	Hypomethylated	MYB	70	19.316	4.49837	5.36627e-19
maleAmplifier	COAD	Hypermethylated	ANDR	252	19.8275	2.36717	5.55823e-19
maleAmplifier	COAD	Hypomethylated	FLI1	100	18.1213	3.61591	8.17926e-18
maleAmplifier	COAD	Hypomethylated	TBX21	32	17.7184	8.59995	2.01548e-17
maleAmplifier	COAD	Hypermethylated	FOXA1	204	18.1694	2.34108	2.31887e-17
maleAmplifier	COAD	Hypermethylated	HNF4A	85	17.518	3.27528	9.59073e-17
maleAmplifier	COAD	Hypomethylated	JUND	41	16.8661	6.05946	1.39842e-16
maleAmplifier	COAD	Hypomethylated	GATA3	57	16.4324	4.45617	3.70399e-16
maleAmplifier	COAD	Hypomethylated	TAL1	77	16.3421	3.70775	4.45122e-16
maleAmplifier	COAD	Hypomethylated	GCR	76	16.3286	3.72907	4.48542e-16
maleAmplifier	COAD	Hypomethylated	TFE2	24	15.9742	11.0096	9.91345e-16
maleAmplifier	COAD	Hypermethylated	ESR1	237	15.9926	2.16279	2.78738e-15
maleAmplifier	COAD	Hypomethylated	FOS	42	13.6926	4.72902	1.81337e-13
maleAmplifier	COAD	Hypomethylated	JUN	51	13.1614	3.94694	5.90445e-13
maleAmplifier	COAD	Hypermethylated	MYC	251	13.1668	1.99428	1.47323e-12
maleAmplifier	COAD	Hypomethylated	CEBPA	33	12.6476	5.39097	1.85042e-12
maleAmplifier	COAD	Hypermethylated	PRGR	131	12.2698	2.19727	1.10423e-11
maleAmplifier	COAD	Hypermethylated	AP2C	118	12.0733	2.25695	1.6533e-11
maleAmplifier	COAD	Hypomethylated	TF65	96	11.1261	2.67287	6.02864e-11
maleAmplifier	COAD	Hypomethylated	SMAD1	29	9.68717	4.5676	1.48182e-09
maleAmplifier	COAD	Hypomethylated	TF7L2	35	8.79986	3.62115	1.0682e-08
maleAmplifier	COAD	Hypomethylated	HTF4	63	8.41042	2.58786	2.53559e-08
maleAmplifier	COAD	Hypomethylated	GATA2	43	7.98099	2.97219	6.70919e-08
maleAmplifier	COAD	Hypomethylated	ATF3	30	7.97035	3.70595	6.76991e-08
maleAmplifier	COAD	Hypermethylated	KLF5	92	8.21726	2.05693	8.30738e-08
maleAmplifier	COAD	Hypomethylated	MYC	114	7.83638	2.20268	9.07646e-08
maleAmplifier	COAD	Hypomethylated	CEBPB	34	7.78311	3.34148	1.01077e-07
maleAmplifier	COAD	Hypomethylated	BACH2	14	7.29166	6.92547	3.08796e-07
maleAmplifier	COAD	Hypomethylated	GRHL2	30	6.74205	3.23193	1.03386e-06
maleAmplifier	COAD	Hypomethylated	SMAD3	37	6.68791	2.85005	1.15508e-06
maleAmplifier	COAD	Hypomethylated	NCOR2	11	6.54419	8.08488	1.58644e-06
maleAmplifier	COAD	Hypermethylated	GRHL2	52	6.79104	2.33352	2.01504e-06
maleAmplifier	COAD	Hypomethylated	TEAD1	22	6.38432	3.82655	2.26186e-06
maleAmplifier	COAD	Hypomethylated	ERG	50	6.33151	2.40629	2.52067e-06
maleAmplifier	COAD	Hypermethylated	GCR	105	6.52527	1.80626	3.50351e-06
maleAmplifier	COAD	Hypermethylated	FOXA2	38	6.30682	2.59907	5.63274e-06
maleAmplifier	COAD	Hypomethylated	ETS1	58	5.50347	2.13005	1.63209e-05
maleAmplifier	COAD	Hypermethylated	PPARG	62	5.7449	2.00641	1.94608e-05
maleAmplifier	COAD	Hypomethylated	FOSL2	10	5.39409	6.85567	2.07332e-05
maleAmplifier	COAD	Hypomethylated	TEAD4	20	5.37033	3.51853	2.16285e-05
maleAmplifier	COAD	Hypomethylated	MAX	87	5.30333	1.91572	2.49289e-05
maleAmplifier	COAD	Hypermethylated	ERR1	30	5.26209	2.62449	5.76348e-05
maleAmplifier	COAD	Hypermethylated	NKX21	49	5.23813	2.09378	5.93812e-05
maleAmplifier	COAD	Hypomethylated	SUH	36	4.81908	2.35688	7.42139e-05
maleAmplifier	COAD	Hypermethylated	JARD2	79	5.11276	1.77859	7.73211e-05
maleAmplifier	COAD	Hypermethylated	TEAD4	33	5.08481	2.44589	8.04971e-05
maleAmplifier	COAD	Hypermethylated	AP2A	39	4.94908	2.23096	0.000107472
maleAmplifier	COAD	Hypomethylated	BCL6	50	4.64292	2.05607	0.000110028
maleAmplifier	COAD	Hypermethylated	ASCL1	36	4.85779	2.28731	0.000126719
maleAmplifier	COAD	Hypomethylated	P63	33	4.52051	2.35705	0.0001425
maleAmplifier	COAD	Hypermethylated	TF7L2	48	4.61726	1.98865	0.000215688
maleAmplifier	COAD	Hypermethylated	TEAD1	32	4.5078	2.31313	0.000265949
maleAmplifier	COAD	Hypermethylated	KLF4	30	4.47662	2.37433	0.000279915
maleAmplifier	COAD	Hypermethylated	MAX	171	4.34866	1.47358	0.000368305
maleAmplifier	COAD	Hypermethylated	JUND	37	4.04605	2.05597	0.000724811
maleAmplifier	COAD	Hypomethylated	NKX21	24	3.66393	2.39655	0.00100121
maleAmplifier	COAD	Hypermethylated	ATF3	39	3.74491	1.94466	0.00142209
maleAmplifier	COAD	Hypomethylated	NFE2	14	3.36673	3.02649	0.00194119
maleAmplifier	COAD	Hypermethylated	GATA6	48	3.49402	1.76873	0.00244023
maleAmplifier	COAD	Hypomethylated	TFAP4	17	3.24987	2.63021	0.00248591
maleAmplifier	COAD	Hypermethylated	E2F1	133	3.39855	1.43019	0.00293158
maleAmplifier	COAD	Hypermethylated	PDX1	10	3.39079	3.85127	0.00293206
maleAmplifier	COAD	Hypermethylated	P63	56	3.24339	1.65234	0.004046
maleAmplifier	COAD	Hypomethylated	RARA	19	2.85409	2.28906	0.0061182
maleAmplifier	COAD	Hypomethylated	STA5A	11	2.65766	2.90679	0.00941698
maleAmplifier	COAD	Hypermethylated	TF65	146	2.78147	1.35459	0.011144
maleAmplifier	COAD	Hypomethylated	VDR	24	2.55962	1.96755	0.0116802
maleAmplifier	COAD	Hypomethylated	KMT2B	32	2.25513	1.70837	0.0223928
maleAmplifier	COAD	Hypermethylated	ARNT	5	2.39557	4.93418	0.0262379
maleAmplifier	COAD	Hypermethylated	TFAP4	27	2.286	1.76358	0.0332401
maleAmplifier	COAD	Hypermethylated	ERG	75	2.27541	1.40692	0.0335366
maleAmplifier	COAD	Hypomethylated	CTCF	86	2.0025	1.40967	0.0389186
maleAmplifier	COAD	Hypomethylated	IRF1	21	1.98043	1.81663	0.0405609
maleAmplifier	COAD	Hypomethylated	HNF4A	22	1.97312	1.78838	0.0408633
maleAmplifier	COAD	Hypomethylated	BMAL1	6	1.94619	3.31544	0.0430757
maleAmplifier	COAD	Hypermethylated	CTCF	186	2.1339	1.26687	0.0450676
maleAmplifier	COAD	Hypomethylated	MITF	11	1.87108	2.2469	0.0502772
maleAmplifier	COAD	Hypermethylated	SMAD3	48	1.98655	1.46245	0.0614381
maleAmplifier	COAD	Hypomethylated	PPARG	23	1.74716	1.67596	0.0662764
maleAmplifier	COAD	Hypermethylated	SP1	151	1.89086	1.25613	0.0754891
maleAmplifier	COAD	Hypermethylated	JUN	50	1.7811	1.40828	0.0944952
maleAmplifier	COAD	Hypermethylated	ESR2	12	1.71627	2.03059	0.10753
maleAmplifier	COAD	Hypermethylated	NKX31	7	1.71308	2.64519	0.10753
maleAmplifier	COAD	Hypomethylated	OTX2	2	1.4664	7.03135	0.12318
maleAmplifier	COAD	Hypomethylated	HSF1	13	1.45272	1.81643	0.126014
maleAmplifier	COAD	Hypomethylated	GATA6	19	1.38081	1.59575	0.145766
maleAmplifier	COAD	Hypermethylated	GATA2	51	1.54745	1.35359	0.147489
maleAmplifier	COAD	Hypermethylated	OTX2	3	1.52795	4.56858	0.150457
maleAmplifier	COAD	Hypermethylated	SIX2	26	1.51207	1.51704	0.154154
maleAmplifier	COAD	Hypermethylated	COT2	8	1.50547	2.23154	0.154629
maleAmplifier	COAD	Hypomethylated	STAT1	25	1.30387	1.47347	0.171564
maleAmplifier	COAD	Hypomethylated	GABPA	36	1.28245	1.38097	0.175048
maleAmplifier	COAD	Hypomethylated	MEIS1	2	1.2804	5.52936	0.175048
maleAmplifier	COAD	Hypermethylated	SOX2	58	1.42223	1.30407	0.180764
maleAmplifier	COAD	Hypomethylated	PO2F1	1	1.22536	16.5681	0.19569
maleAmplifier	COAD	Hypomethylated	PRD14	6	1.18296	2.16215	0.21405
maleAmplifier	COAD	Hypomethylated	HIF1A	17	1.16365	1.52828	0.220282
maleAmplifier	COAD	Hypomethylated	ARNT	2	1.12968	4.52567	0.235357
maleAmplifier	COAD	Hypomethylated	COT2	4	1.12817	2.57512	0.235357
maleAmplifier	COAD	Hypermethylated	GATA3	48	1.28822	1.30527	0.240513
maleAmplifier	COAD	Hypermethylated	FOSL2	7	1.18026	2.00626	0.301536
maleAmplifier	COAD	Hypermethylated	SMAD1	23	1.14769	1.41579	0.321445
maleAmplifier	COAD	Hypermethylated	MITF	17	1.0968	1.47921	0.35748
maleAmplifier	COAD	Hypermethylated	EPAS1	3	1.07875	2.96693	0.368597
maleAmplifier	COAD	Hypomethylated	IKZF1	6	0.920808	1.82248	0.368755
maleAmplifier	COAD	Hypermethylated	CEBPB	34	1.06135	1.3016	0.375637
maleAmplifier	COAD	Hypomethylated	GATA1	40	0.83884	1.22539	0.431641
maleAmplifier	COAD	Hypermethylated	CDX2	1	0.957798	8.69696	0.466952
maleAmplifier	COAD	Hypomethylated	FOXA1	57	0.793542	1.1818	0.472249
maleAmplifier	COAD	Hypomethylated	STAT4	1	0.788301	5.67288	0.474593
maleAmplifier	COAD	Hypermethylated	CREB1	79	0.932812	1.16846	0.489558
maleAmplifier	COAD	Hypermethylated	PO2F1	1	0.879788	7.16229	0.542068
maleAmplifier	COAD	Hypermethylated	FOXM1	65	0.774201	1.14754	0.671126
maleAmplifier	COAD	Hypermethylated	P53	96	0.733252	1.11537	0.709914
maleAmplifier	COAD	Hypomethylated	AP2C	30	0.592461	1.15885	0.724457
maleAmplifier	COAD	Hypermethylated	FOS	29	0.70143	1.19728	0.736357
maleAmplifier	COAD	Hypomethylated	PAX5	6	0.57644	1.40145	0.746534
maleAmplifier	COAD	Hypomethylated	NCOR1	17	0.530446	1.17785	0.813223
maleAmplifier	COAD	Hypomethylated	DUX4	1	0.501583	2.65695	0.851952
maleAmplifier	COAD	Hypomethylated	PDX1	2	0.495514	1.74692	0.858294
maleAmplifier	COAD	Hypermethylated	BMAL1	6	0.590656	1.41344	0.901572
maleAmplifier	COAD	Hypomethylated	SIX2	9	0.45718	1.19487	0.913612
maleAmplifier	COAD	Hypermethylated	NR1H3	1	0.581094	3.30723	0.913831
maleAmplifier	COAD	Hypomethylated	PRDM1	1	0.44978	2.29217	0.916739
maleAmplifier	COAD	Hypomethylated	EPAS1	1	0.446416	2.26992	0.916739
maleAmplifier	COAD	Hypomethylated	SMAD4	8	0.440886	1.19423	0.916739
maleAmplifier	COAD	Hypomethylated	ATF4	1	0.439806	2.22668	0.916739
maleAmplifier	COAD	Hypomethylated	MAF	5	0.420673	1.24293	0.945552
maleAmplifier	COAD	Hypermethylated	PRD14	8	0.485617	1.23496	1
maleAmplifier	COAD	Hypermethylated	UBF1	4	0.415875	1.27757	1
maleAmplifier	COAD	Hypermethylated	STAT3	7	0.404495	1.16912	1
maleAmplifier	COAD	Hypermethylated	COE1	5	0.390324	1.19776	1
maleAmplifier	COAD	Hypermethylated	NCOA1	6	0.350267	1.12232	1
maleAmplifier	COAD	Hypermethylated	SMAD4	16	0.312053	1.03107	1
maleAmplifier	COAD	Hypermethylated	NANOG	27	0.277227	0.999889	1
maleAmplifier	COAD	Hypermethylated	GATA4	11	0.272901	1.00632	1
maleAmplifier	COAD	Hypermethylated	KDM5C	10	0.210454	0.942756	1
maleAmplifier	COAD	Hypermethylated	ATF4	1	0.189308	0.962895	1
maleAmplifier	COAD	Hypermethylated	NFKB1	2	0.186851	0.901789	1
maleAmplifier	COAD	Hypermethylated	MYBB	1	0.181682	0.933247	1
maleAmplifier	COAD	Hypermethylated	VDR	28	0.178191	0.934093	1
maleAmplifier	COAD	Hypermethylated	STAT1	38	0.158168	0.927609	1
maleAmplifier	COAD	Hypermethylated	PO5F1	69	0.157749	0.94198	1
maleAmplifier	COAD	Hypermethylated	FOXK1	2	0.157011	0.825976	1
maleAmplifier	COAD	Hypermethylated	RXRA	36	0.139231	0.911982	1
maleAmplifier	COAD	Hypermethylated	ZBT17	17	0.122568	0.864464	1
maleAmplifier	COAD	Hypermethylated	HSF1	14	0.0952208	0.818671	1
maleAmplifier	COAD	Hypermethylated	SMAD2	5	0.0838039	0.716248	1
maleAmplifier	COAD	Hypermethylated	CEBPA	13	0.0809534	0.792239	1
maleAmplifier	COAD	Hypermethylated	HIF1A	22	0.0773049	0.825014	1
maleAmplifier	COAD	Hypermethylated	NFE2	8	0.059668	0.709929	1
maleAmplifier	COAD	Hypermethylated	RUNX1	117	0.0522456	0.884228	1
maleAmplifier	COAD	Hypermethylated	FOXP1	20	0.0434879	0.763446	1
maleAmplifier	COAD	Hypermethylated	RARA	15	0.0420511	0.733788	1
maleAmplifier	COAD	Hypermethylated	KLF1	3	0.0351515	0.526896	1
maleAmplifier	COAD	Hypermethylated	LEF1	2	0.035062	0.47473	1
maleAmplifier	COAD	Hypermethylated	NR2C2	5	0.0312631	0.578662	1
maleAmplifier	COAD	Hypermethylated	GATA1	66	0.0257297	0.820412	1
maleAmplifier	COAD	Hypermethylated	IKZF1	4	0.0225829	0.515558	1
maleAmplifier	COAD	Hypermethylated	KMT2A	13	0.0195256	0.654524	1
maleAmplifier	COAD	Hypermethylated	MYCN	30	0.0182544	0.739391	1
maleAmplifier	COAD	Hypermethylated	NCOR2	1	0.0159892	0.300674	1
maleAmplifier	COAD	Hypermethylated	KDM5B	53	0.0133576	0.773125	1
maleAmplifier	COAD	Hypermethylated	GABPA	50	0.012882	0.766705	1
maleAmplifier	COAD	Hypermethylated	EGR2	5	0.0111307	0.486713	1
maleAmplifier	COAD	Hypermethylated	TFE2	2	0.00992598	0.350323	1
maleAmplifier	COAD	Hypermethylated	STA5A	4	0.0085893	0.436791	1
maleAmplifier	COAD	Hypermethylated	REST	18	0.00717031	0.631575	1
maleAmplifier	COAD	Hypermethylated	ETV1	28	0.00693323	0.681651	1
maleAmplifier	COAD	Hypermethylated	LYL1	1	0.00668134	0.238463	1
maleAmplifier	COAD	Hypermethylated	TAL1	50	0.00495131	0.72665	1
maleAmplifier	COAD	Hypermethylated	PAX5	4	0.00441183	0.396464	1
maleAmplifier	COAD	Hypermethylated	BACH2	1	0.00294385	0.199373	1
maleAmplifier	COAD	Hypermethylated	NCOR1	21	0.0026797	0.605476	1
maleAmplifier	COAD	Hypermethylated	TBX21	3	0.00111787	0.295196	1
maleAmplifier	COAD	Hypermethylated	SPI1	91	0.00109322	0.731696	1
maleAmplifier	COAD	Hypermethylated	ZN143	17	0.00107886	0.542529	1
maleAmplifier	COAD	Hypermethylated	NRF1	30	0.000940036	0.6128	1
maleAmplifier	COAD	Hypermethylated	NFYA	26	0.000928645	0.594316	1
maleAmplifier	COAD	Hypermethylated	KDM5A	8	0.000482497	0.406117	1
maleAmplifier	COAD	Hypermethylated	FLI1	73	0.000446078	0.690236	1
maleAmplifier	COAD	Hypermethylated	KMT2B	28	0.00043906	0.58101	1
maleAmplifier	COAD	Hypermethylated	ELK4	2	0.000207227	0.197407	1
maleAmplifier	COAD	Hypermethylated	E2F4	5	0.000190199	0.311309	1
maleAmplifier	COAD	Hypermethylated	ETS1	49	0.000153649	0.623224	1
maleAmplifier	COAD	Hypermethylated	IRF1	12	7.35938e-05	0.414139	1
maleAmplifier	COAD	Hypermethylated	BCL6	39	5.33409e-05	0.572219	1
maleAmplifier	COAD	Hypermethylated	HTF4	43	4.79501e-05	0.582311	1
maleAmplifier	COAD	Hypermethylated	MAF	1	3.53721e-05	0.105306	1
maleAmplifier	COAD	Hypermethylated	TYY1	35	4.02089e-06	0.509868	1
maleAmplifier	COAD	Hypermethylated	ZFX	5	3.79002e-06	0.23628	1
maleAmplifier	COAD	Hypermethylated	TBP	13	1.36762e-06	0.351321	1
maleAmplifier	COAD	Hypermethylated	SUH	15	6.83608e-07	0.36186	1
maleAmplifier	COAD	Hypermethylated	ELF1	25	3.17892e-07	0.424823	1
maleAmplifier	COAD	Hypermethylated	MYB	18	1.55747e-08	0.341887	1
maleAmplifier	COAD	Hypermethylated	ATRX	0	0	0	1
maleAmplifier	COAD	Hypermethylated	DUX4	0	0	0	1
maleAmplifier	COAD	Hypermethylated	FOXO1	0	0	0	1
maleAmplifier	COAD	Hypermethylated	IRF2	0	0	0	1
maleAmplifier	COAD	Hypermethylated	KLF6	0	0	0	1
maleAmplifier	COAD	Hypermethylated	MEIS1	0	0	0	1
maleAmplifier	COAD	Hypermethylated	PAX6	0	0	0	1
maleAmplifier	COAD	Hypermethylated	PRDM1	0	0	0	1
maleAmplifier	COAD	Hypermethylated	SMRC1	0	0	0	1
maleAmplifier	COAD	Hypermethylated	SNPC4	0	0	0	1
maleAmplifier	COAD	Hypermethylated	SOX9	0	0	0	1
maleAmplifier	COAD	Hypermethylated	STAT4	0	0	0	1
maleAmplifier	COAD	Hypermethylated	ZN263	0	0	0	1
maleAmplifier	COAD	Hypomethylated	RXRA	18	0.360046	1.06421	1
maleAmplifier	COAD	Hypomethylated	IRF2	1	0.30958	1.48988	1
maleAmplifier	COAD	Hypomethylated	KLF5	22	0.302409	1.02001	1
maleAmplifier	COAD	Hypomethylated	AP2A	8	0.263522	1.00438	1
maleAmplifier	COAD	Hypomethylated	ESR1	65	0.263449	0.992899	1
maleAmplifier	COAD	Hypomethylated	PRGR	30	0.241621	0.978708	1
maleAmplifier	COAD	Hypomethylated	ASCL1	7	0.239604	0.977764	1
maleAmplifier	COAD	Hypomethylated	ZBT17	8	0.209912	0.940392	1
maleAmplifier	COAD	Hypomethylated	NANOG	11	0.201715	0.934983	1
maleAmplifier	COAD	Hypomethylated	KDM5C	4	0.169431	0.867335	1
maleAmplifier	COAD	Hypomethylated	GATA4	4	0.154498	0.839715	1
maleAmplifier	COAD	Hypomethylated	SOX2	18	0.151329	0.895947	1
maleAmplifier	COAD	Hypomethylated	ESR2	2	0.133549	0.765935	1
maleAmplifier	COAD	Hypomethylated	P53	35	0.129801	0.899667	1
maleAmplifier	COAD	Hypomethylated	FOXM1	22	0.112786	0.863985	1
maleAmplifier	COAD	Hypomethylated	SMAD2	2	0.0939194	0.659664	1
maleAmplifier	COAD	Hypomethylated	ELK4	3	0.092597	0.690164	1
maleAmplifier	COAD	Hypomethylated	EGR2	3	0.0868514	0.676005	1
maleAmplifier	COAD	Hypomethylated	COE1	1	0.0763982	0.548376	1
maleAmplifier	COAD	Hypomethylated	LEF1	1	0.0761581	0.547508	1
maleAmplifier	COAD	Hypomethylated	ERR1	3	0.0492858	0.572908	1
maleAmplifier	COAD	Hypomethylated	KLF1	1	0.0383371	0.4042	1
maleAmplifier	COAD	Hypomethylated	KLF4	3	0.0331715	0.518452	1
maleAmplifier	COAD	Hypomethylated	STAT3	1	0.0327322	0.380675	1
maleAmplifier	COAD	Hypomethylated	ZFX	5	0.0248714	0.552642	1
maleAmplifier	COAD	Hypomethylated	KMT2A	4	0.0122729	0.460268	1
maleAmplifier	COAD	Hypomethylated	ANDR	54	0.00898303	0.735891	1
maleAmplifier	COAD	Hypomethylated	REST	6	0.00730563	0.480716	1
maleAmplifier	COAD	Hypomethylated	TYY1	18	0.00601404	0.613602	1
maleAmplifier	COAD	Hypomethylated	FOXA2	2	0.00381645	0.291671	1
maleAmplifier	COAD	Hypomethylated	JARD2	11	0.00213469	0.500941	1
maleAmplifier	COAD	Hypomethylated	FOXP1	4	0.00151324	0.343522	1
maleAmplifier	COAD	Hypomethylated	ZN143	5	0.00113055	0.363359	1
maleAmplifier	COAD	Hypomethylated	KDM5B	16	0.000901951	0.517703	1
maleAmplifier	COAD	Hypomethylated	TBP	6	0.000757805	0.374496	1
maleAmplifier	COAD	Hypomethylated	PO5F1	17	0.000383339	0.497537	1
maleAmplifier	COAD	Hypomethylated	MYCN	6	0.000167045	0.328607	1
maleAmplifier	COAD	Hypomethylated	ELF1	10	0.000113251	0.389999	1
maleAmplifier	COAD	Hypomethylated	ETV1	5	3.81631e-05	0.270345	1
maleAmplifier	COAD	Hypomethylated	NFYA	5	1.68272e-05	0.255028	1
maleAmplifier	COAD	Hypomethylated	NRF1	6	1.19392e-05	0.272384	1
maleAmplifier	COAD	Hypomethylated	SP1	31	5.33525e-06	0.475102	1
maleAmplifier	COAD	Hypomethylated	CREB1	10	8.32049e-07	0.29786	1
maleAmplifier	COAD	Hypomethylated	E2F1	19	3.83012e-07	0.371742	1
maleAmplifier	COAD	Hypomethylated	ATRX	0	0	0	1
maleAmplifier	COAD	Hypomethylated	CDX2	0	0	0	1
maleAmplifier	COAD	Hypomethylated	E2F4	0	0	0	1
maleAmplifier	COAD	Hypomethylated	FOXK1	0	0	0	1
maleAmplifier	COAD	Hypomethylated	FOXO1	0	0	0	1
maleAmplifier	COAD	Hypomethylated	KDM5A	0	0	0	1
maleAmplifier	COAD	Hypomethylated	KLF6	0	0	0	1
maleAmplifier	COAD	Hypomethylated	MYBB	0	0	0	1
maleAmplifier	COAD	Hypomethylated	NCOA1	0	0	0	1
maleAmplifier	COAD	Hypomethylated	NFKB1	0	0	0	1
maleAmplifier	COAD	Hypomethylated	NKX31	0	0	0	1
maleAmplifier	COAD	Hypomethylated	NR1H3	0	0	0	1
maleAmplifier	COAD	Hypomethylated	NR2C2	0	0	0	1
maleAmplifier	COAD	Hypomethylated	PAX6	0	0	0	1
maleAmplifier	COAD	Hypomethylated	SMRC1	0	0	0	1
maleAmplifier	COAD	Hypomethylated	SNPC4	0	0	0	1
maleAmplifier	COAD	Hypomethylated	SOX9	0	0	0	1
maleAmplifier	COAD	Hypomethylated	UBF1	0	0	0	1
maleAmplifier	COAD	Hypomethylated	ZN263	0	0	0	1
shared	COAD	Hypomethylated	SPI1	965	178.121	4.1287	3.10702e-176
shared	COAD	Hypomethylated	RUNX1	997	165.703	3.90381	4.07474e-164
shared	COAD	Hypermethylated	HNF4A	658	161.841	3.99793	5.92913e-160
shared	COAD	Hypomethylated	LYL1	197	150.639	15.9912	3.14865e-149
shared	COAD	Hypomethylated	JUN	476	137.221	4.73413	6.17166e-136
shared	COAD	Hypermethylated	FOXA1	1384	121.673	2.40234	4.36418e-120
shared	COAD	Hypomethylated	FOS	363	117.955	5.0973	9.12307e-117
shared	COAD	Hypomethylated	CEBPA	294	114.656	6.03852	1.51357e-113
shared	COAD	Hypomethylated	JUND	306	108.221	5.44877	3.52673e-107
shared	COAD	Hypomethylated	ATF3	322	107.746	5.17501	9.22529e-107
shared	COAD	Hypomethylated	FLI1	733	95.1501	2.91509	3.23253e-94
shared	COAD	Hypomethylated	SMAD3	376	85.5293	3.74021	1.21485e-84
shared	COAD	Hypomethylated	CEBPB	321	80.8142	3.98564	5.73067e-80
shared	COAD	Hypomethylated	FOSL2	125	80.0392	11.2117	3.12976e-79
shared	COAD	Hypermethylated	GATA6	482	76.3508	2.84684	6.10771e-75
shared	COAD	Hypomethylated	TEAD1	214	67.2749	4.68595	1.67899e-66
shared	COAD	Hypomethylated	GATA3	363	66.4839	3.18398	9.63504e-66
shared	COAD	Hypomethylated	TBX21	172	62.6157	5.35295	6.63895e-62
shared	COAD	Hypomethylated	TFE2	131	61.8344	7.15275	3.76128e-61
shared	COAD	Hypermethylated	FOXA2	299	57.8363	3.14868	1.49776e-56
shared	COAD	Hypomethylated	TAL1	489	56.303	2.51518	1.20328e-55
shared	COAD	Hypomethylated	NKX21	259	52.3615	3.30113	9.93226e-52
shared	COAD	Hypomethylated	TEAD4	187	51.3697	4.10176	9.23331e-51
shared	COAD	Hypomethylated	GCR	464	49.3438	2.3997	9.31219e-49
shared	COAD	Hypomethylated	ERG	421	49.1568	2.48466	1.36391e-48
shared	COAD	Hypermethylated	GRHL2	362	45.5825	2.45815	2.14985e-44
shared	COAD	Hypomethylated	TF65	681	43.5905	2.04795	4.79599e-43
shared	COAD	Hypermethylated	ASCL1	270	39.0939	2.61427	5.5181e-38
shared	COAD	Hypomethylated	PPARG	276	37.9732	2.60427	1.90051e-37
shared	COAD	Hypermethylated	ANDR	1383	37.278	1.60013	3.09582e-36
shared	COAD	Hypomethylated	SMAD1	175	35.6206	3.22555	4.10277e-35
shared	COAD	Hypomethylated	HTF4	438	32.8653	2.04341	2.24183e-32
shared	COAD	Hypomethylated	TF7L2	221	32.465	2.65864	5.41786e-32
shared	COAD	Hypomethylated	MYC	842	28.9835	1.74173	1.5813e-28
shared	COAD	Hypomethylated	BACH2	80	27.2193	4.76636	8.85939e-27
shared	COAD	Hypomethylated	GATA2	276	26.902	2.19105	1.77617e-26
shared	COAD	Hypomethylated	STAT1	285	26.7715	2.16036	2.31874e-26
shared	COAD	Hypermethylated	ERR1	192	26.819	2.52425	7.79457e-26
shared	COAD	Hypomethylated	GRHL2	193	24.6598	2.44053	2.8109e-24
shared	COAD	Hypomethylated	P63	247	22.466	2.10872	4.25909e-22
shared	COAD	Hypermethylated	NKX31	74	22.9594	4.3357	5.01412e-22
shared	COAD	Hypomethylated	MYB	308	21.6827	1.93221	2.51002e-21
shared	COAD	Hypermethylated	PRGR	678	21.9788	1.55951	4.31511e-21
shared	COAD	Hypermethylated	NKX21	284	17.2489	1.78816	1.65495e-16
shared	COAD	Hypomethylated	COT2	52	15.8513	4.17013	1.28617e-15
shared	COAD	Hypermethylated	SIX2	213	15.6135	1.88873	6.2549e-15
shared	COAD	Hypermethylated	TEAD4	181	15.3212	1.98428	1.15384e-14
shared	COAD	Hypomethylated	RARA	142	13.2312	2.06156	5.1351e-13
shared	COAD	Hypermethylated	ESR1	1209	13.2752	1.32004	1.21151e-12
shared	COAD	Hypomethylated	VDR	187	12.7483	1.84956	1.49729e-12
shared	COAD	Hypermethylated	GATA2	376	12.0319	1.50919	1.73573e-11
shared	COAD	Hypermethylated	GCR	576	12.008	1.40388	1.75438e-11
shared	COAD	Hypermethylated	AP2C	546	11.7879	1.40982	2.79108e-11
shared	COAD	Hypermethylated	P63	347	11.399	1.51354	6.55941e-11
shared	COAD	Hypomethylated	STA5A	77	11.0049	2.45961	7.81602e-11
shared	COAD	Hypermethylated	PDX1	53	11.1539	3.0763	1.10897e-10
shared	COAD	Hypermethylated	TF7L2	263	11.0766	1.59485	1.2761e-10
shared	COAD	Hypomethylated	NCOR2	41	10.7041	3.57359	1.53269e-10
shared	COAD	Hypomethylated	HIF1A	161	10.1354	1.7832	5.57213e-10
shared	COAD	Hypomethylated	BMAL1	46	9.93343	3.10297	8.71056e-10
shared	COAD	Hypomethylated	IRF1	167	9.85501	1.74797	1.02482e-09
shared	COAD	Hypomethylated	NFE2	85	9.66127	2.19402	1.54577e-09
shared	COAD	Hypomethylated	EPAS1	21	9.54238	5.97857	1.99806e-09
shared	COAD	Hypermethylated	KLF5	448	9.75987	1.3998	2.55163e-09
shared	COAD	Hypomethylated	PRGR	345	9.12405	1.46525	5.14802e-09
shared	COAD	Hypomethylated	TFAP4	104	8.42187	1.91104	2.50945e-08
shared	COAD	Hypermethylated	JUND	193	8.08139	1.57214	1.09924e-07
shared	COAD	Hypermethylated	TEAD1	156	8.009	1.65237	1.25803e-07
shared	COAD	Hypomethylated	ETS1	346	7.03386	1.38753	5.50971e-07
shared	COAD	Hypomethylated	MAX	569	6.98581	1.31505	6.06639e-07
shared	COAD	Hypomethylated	MEIS1	16	6.95322	5.4763	6.44702e-07
shared	COAD	Hypermethylated	CEBPB	247	6.52844	1.42101	3.50351e-06
shared	COAD	Hypermethylated	GATA3	330	6.14142	1.34239	8.02075e-06
shared	COAD	Hypomethylated	SIX2	102	5.74492	1.67436	9.60347e-06
shared	COAD	Hypomethylated	SUH	196	5.71831	1.45013	1.00794e-05
shared	COAD	Hypomethylated	KMT2B	221	5.12127	1.38856	3.7454e-05
shared	COAD	Hypomethylated	ARNT	14	4.53545	3.88465	0.00013928
shared	COAD	Hypomethylated	GABPA	281	4.08348	1.29162	0.000385372
shared	COAD	Hypomethylated	RXRA	181	3.49572	1.3258	0.00145842
shared	COAD	Hypermethylated	FOSL2	43	3.70981	1.84468	0.00151272
shared	COAD	Hypomethylated	P53	369	3.27499	1.21966	0.0023717
shared	COAD	Hypomethylated	MITF	62	2.77432	1.50903	0.00727438
shared	COAD	Hypermethylated	CDX2	5	2.9329	6.79118	0.00799439
shared	COAD	Hypomethylated	BCL6	270	2.54194	1.20899	0.0120414
shared	COAD	Hypomethylated	OTX2	8	2.51684	3.42091	0.012629
shared	COAD	Hypomethylated	NR1H3	5	2.29734	4.69883	0.0205203
shared	COAD	Hypermethylated	TFAP4	129	1.87138	1.23316	0.0778399
shared	COAD	Hypomethylated	AP2C	246	1.60085	1.14989	0.0919964
shared	COAD	Hypomethylated	NFKB1	14	1.49693	1.77628	0.115834
shared	COAD	Hypermethylated	PPARG	252	1.62009	1.14422	0.13143
shared	COAD	Hypomethylated	SOX2	186	1.3783	1.14986	0.145766
shared	COAD	Hypermethylated	KLF4	106	1.46222	1.20883	0.168786
shared	COAD	Hypomethylated	COE1	22	1.28658	1.47723	0.175048
shared	COAD	Hypomethylated	HSF1	74	1.27898	1.22684	0.175048
shared	COAD	Hypermethylated	OTX2	9	1.42517	2.04284	0.180764
shared	COAD	Hypomethylated	IKZF1	36	1.16844	1.31472	0.219582
shared	COAD	Hypermethylated	GATA4	88	1.28921	1.20557	0.240513
shared	COAD	Hypomethylated	SMRC1	2	0.965211	3.63276	0.339906
shared	COAD	Hypomethylated	ZBT17	80	0.900273	1.14944	0.383032
shared	COAD	Hypomethylated	ESR2	27	0.856752	1.26192	0.417224
shared	COAD	Hypermethylated	ARNT	10	0.796868	1.45473	0.643241
shared	COAD	Hypermethylated	ATF3	151	0.706206	1.07776	0.735855
shared	COAD	Hypermethylated	COT2	29	0.705657	1.1938	0.735855
shared	COAD	Hypomethylated	HNF4A	113	0.555523	1.06335	0.778039
shared	COAD	Hypomethylated	EGR2	40	0.531683	1.10225	0.813223
shared	COAD	Hypomethylated	PAX5	39	0.510933	1.09612	0.839328
shared	COAD	Hypomethylated	IRF2	7	0.491817	1.26324	0.860012
shared	COAD	Hypomethylated	ESR1	548	0.472884	1.02352	0.886815
shared	COAD	Hypomethylated	PAX6	1	0.424031	2.137	0.943989
shared	COAD	Hypomethylated	FOXO1	1	0.395843	1.96298	0.995154
shared	COAD	Hypermethylated	NR1H3	3	0.474698	1.4761	1
shared	COAD	Hypermethylated	ESR2	43	0.448726	1.06815	1
shared	COAD	Hypermethylated	ATF4	7	0.26082	1.00269	1
shared	COAD	Hypermethylated	AP2A	120	0.196435	0.971029	1
shared	COAD	Hypermethylated	NCOA1	34	0.183672	0.943219	1
shared	COAD	Hypermethylated	DUX4	5	0.156944	0.852386	1
shared	COAD	Hypermethylated	JUN	237	0.127872	0.958095	1
shared	COAD	Hypermethylated	PRDM1	5	0.0925442	0.734597	1
shared	COAD	Hypermethylated	MYC	1130	0.0860755	0.967047	1
shared	COAD	Hypermethylated	STAT4	1	0.0281871	0.360798	1
shared	COAD	Hypermethylated	EPAS1	3	0.0143065	0.434775	1
shared	COAD	Hypermethylated	SMAD3	202	0.0135831	0.876168	1
shared	COAD	Hypermethylated	NFKB1	8	0.00805261	0.532897	1
shared	COAD	Hypermethylated	SOX2	274	0.00763234	0.877836	1
shared	COAD	Hypermethylated	CEBPA	88	0.00591078	0.796259	1
shared	COAD	Hypermethylated	ZBT17	106	0.00367845	0.797903	1
shared	COAD	Hypermethylated	FOXK1	8	0.00356011	0.487883	1
shared	COAD	Hypermethylated	COE1	16	0.0020777	0.563959	1
shared	COAD	Hypermethylated	ERG	327	0.00118107	0.853355	1
shared	COAD	Hypermethylated	BMAL1	15	0.000767318	0.518208	1
shared	COAD	Hypermethylated	NANOG	143	0.000419476	0.775628	1
shared	COAD	Hypermethylated	NCOR2	9	0.000198113	0.400524	1
shared	COAD	Hypermethylated	PRD14	23	8.34995e-05	0.519911	1
shared	COAD	Hypermethylated	SMAD2	25	7.14842e-05	0.528651	1
shared	COAD	Hypermethylated	FOS	122	6.51845e-05	0.728693	1
shared	COAD	Hypermethylated	IRF2	1	1.20508e-05	0.0947527	1
shared	COAD	Hypermethylated	BACH2	13	7.16703e-06	0.384102	1
shared	COAD	Hypermethylated	KLF1	16	6.92378e-06	0.415008	1
shared	COAD	Hypermethylated	UBF1	5	2.64797e-06	0.233776	1
shared	COAD	Hypermethylated	VDR	142	1.13369e-06	0.69143	1
shared	COAD	Hypermethylated	MITF	40	2.09519e-07	0.502145	1
shared	COAD	Hypermethylated	PAX5	31	1.05745e-07	0.455284	1
shared	COAD	Hypermethylated	MAX	736	3.69843e-10	0.779789	1
shared	COAD	Hypermethylated	TFE2	8	2.69477e-10	0.20645	1
shared	COAD	Hypermethylated	STAT3	9	2.04083e-10	0.218908	1
shared	COAD	Hypermethylated	LEF1	3	8.44404e-11	0.104602	1
shared	COAD	Hypermethylated	NR2C2	17	2.55361e-11	0.288958	1
shared	COAD	Hypermethylated	FOXM1	273	9.83672e-12	0.673431	1
shared	COAD	Hypermethylated	SMAD1	47	4.32067e-13	0.412408	1
shared	COAD	Hypermethylated	HSF1	49	3.46628e-13	0.417359	1
shared	COAD	Hypermethylated	HIF1A	93	1.14659e-13	0.50671	1
shared	COAD	Hypermethylated	FOXP1	90	9.66738e-14	0.500906	1
shared	COAD	Hypermethylated	SMAD4	41	8.5343e-14	0.381882	1
shared	COAD	Hypermethylated	STAT1	165	2.19867e-14	0.578237	1
shared	COAD	Hypermethylated	TBX21	16	3.56801e-15	0.232116	1
shared	COAD	Hypermethylated	JARD2	200	1.83222e-15	0.591292	1
shared	COAD	Hypermethylated	IKZF1	7	2.89298e-16	0.132167	1
shared	COAD	Hypermethylated	CTCF	821	0	0.675989	1
shared	COAD	Hypermethylated	TF65	550	0	0.630302	1
shared	COAD	Hypermethylated	SP1	518	0	0.516875	1
shared	COAD	Hypermethylated	P53	335	0	0.512131	1
shared	COAD	Hypermethylated	E2F1	369	0	0.475697	1
shared	COAD	Hypermethylated	GATA1	288	0	0.50072	1
shared	COAD	Hypermethylated	SPI1	364	0	0.393765	1
shared	COAD	Hypermethylated	RUNX1	393	0	0.375865	1
shared	COAD	Hypermethylated	CREB1	214	0	0.41703	1
shared	COAD	Hypermethylated	TAL1	197	0	0.403093	1
shared	COAD	Hypermethylated	PO5F1	200	0	0.367067	1
shared	COAD	Hypermethylated	FLI1	196	0	0.245898	1
shared	COAD	Hypermethylated	GABPA	160	0	0.340876	1
shared	COAD	Hypermethylated	RXRA	107	0	0.382616	1
shared	COAD	Hypermethylated	BCL6	118	0	0.243195	1
shared	COAD	Hypermethylated	KDM5B	116	0	0.229682	1
shared	COAD	Hypermethylated	TYY1	106	0	0.218008	1
shared	COAD	Hypermethylated	NRF1	78	0	0.225504	1
shared	COAD	Hypermethylated	SUH	64	0	0.225076	1
shared	COAD	Hypermethylated	ETS1	97	0	0.16789	1
shared	COAD	Hypermethylated	ETV1	58	0	0.199383	1
shared	COAD	Hypermethylated	KMT2B	64	0	0.187882	1
shared	COAD	Hypermethylated	MYCN	56	0	0.193869	1
shared	COAD	Hypermethylated	ZN143	45	0	0.207086	1
shared	COAD	Hypermethylated	HTF4	71	0	0.131543	1
shared	COAD	Hypermethylated	NCOR1	45	0	0.18536	1
shared	COAD	Hypermethylated	RARA	30	0	0.21151	1
shared	COAD	Hypermethylated	ELF1	52	0	0.125284	1
shared	COAD	Hypermethylated	MYB	47	0	0.128395	1
shared	COAD	Hypermethylated	REST	33	0	0.165854	1
shared	COAD	Hypermethylated	NFYA	42	0	0.135386	1
shared	COAD	Hypermethylated	IRF1	29	0	0.14509	1
shared	COAD	Hypermethylated	KDM5C	15	0	0.204986	1
shared	COAD	Hypermethylated	TBP	29	0	0.113318	1
shared	COAD	Hypermethylated	KMT2A	18	0	0.130562	1
shared	COAD	Hypermethylated	EGR2	11	0	0.156773	1
shared	COAD	Hypermethylated	MAF	10	0	0.155548	1
shared	COAD	Hypermethylated	NFE2	11	0	0.14192	1
shared	COAD	Hypermethylated	ZFX	13	0	0.0899639	1
shared	COAD	Hypermethylated	STA5A	8	0	0.128025	1
shared	COAD	Hypermethylated	KDM5A	8	0	0.0589513	1
shared	COAD	Hypermethylated	ELK4	6	0	0.087089	1
shared	COAD	Hypermethylated	E2F4	5	0	0.0454395	1
shared	COAD	Hypermethylated	ATRX	0	0	0	1
shared	COAD	Hypermethylated	FOXO1	0	0	0	1
shared	COAD	Hypermethylated	KLF6	0	0	0	1
shared	COAD	Hypermethylated	LYL1	0	0	0	1
shared	COAD	Hypermethylated	MEIS1	0	0	0	1
shared	COAD	Hypermethylated	MYBB	0	0	0	1
shared	COAD	Hypermethylated	PAX6	0	0	0	1
shared	COAD	Hypermethylated	PO2F1	0	0	0	1
shared	COAD	Hypermethylated	SMRC1	0	0	0	1
shared	COAD	Hypermethylated	SNPC4	0	0	0	1
shared	COAD	Hypermethylated	SOX9	0	0	0	1
shared	COAD	Hypermethylated	ZN263	0	0	0	1
shared	COAD	Hypomethylated	STAT4	2	0.365014	1.36697	1
shared	COAD	Hypomethylated	NANOG	97	0.29515	1.00211	1
shared	COAD	Hypomethylated	ATF4	4	0.291418	1.07512	1
shared	COAD	Hypomethylated	CTCF	565	0.15872	0.975307	1
shared	COAD	Hypomethylated	NCOR1	113	0.107263	0.930845	1
shared	COAD	Hypomethylated	PRD14	20	0.105842	0.85563	1
shared	COAD	Hypomethylated	ERR1	38	0.101659	0.885297	1
shared	COAD	Hypomethylated	DUX4	2	0.0864687	0.638845	1
shared	COAD	Hypomethylated	KLF4	41	0.0771608	0.86591	1
shared	COAD	Hypomethylated	AP2A	58	0.0690254	0.87657	1
shared	COAD	Hypomethylated	MYBB	2	0.0472209	0.518716	1
shared	COAD	Hypomethylated	PDX1	6	0.0396337	0.628802	1
shared	COAD	Hypomethylated	KDM5C	30	0.034912	0.785179	1
shared	COAD	Hypomethylated	MAF	25	0.0241787	0.743753	1
shared	COAD	Hypomethylated	SMAD2	17	0.0166858	0.677913	1
shared	COAD	Hypomethylated	STAT3	14	0.0147165	0.646348	1
shared	COAD	Hypomethylated	SMAD4	43	0.0139596	0.765042	1
shared	COAD	Hypomethylated	PRDM1	1	0.0116559	0.274889	1
shared	COAD	Hypomethylated	GATA1	249	0.0083076	0.870376	1
shared	COAD	Hypomethylated	FOXA1	379	0.00674412	0.883768	1
shared	COAD	Hypomethylated	KLF1	10	0.00173728	0.488549	1
shared	COAD	Hypomethylated	NKX31	3	0.0016094	0.30997	1
shared	COAD	Hypomethylated	FOXK1	2	0.000694038	0.228706	1
shared	COAD	Hypomethylated	GATA6	74	0.000511502	0.71218	1
shared	COAD	Hypomethylated	FOXA2	34	0.000303854	0.605543	1
shared	COAD	Hypomethylated	UBF1	2	6.51635e-05	0.175932	1
shared	COAD	Hypomethylated	ASCL1	34	5.30112e-05	0.565207	1
shared	COAD	Hypomethylated	LEF1	3	1.53995e-05	0.197363	1
shared	COAD	Hypomethylated	NCOA1	5	1.26507e-05	0.257135	1
shared	COAD	Hypomethylated	NR2C2	11	4.98269e-06	0.352496	1
shared	COAD	Hypomethylated	JARD2	113	7.96775e-08	0.630604	1
shared	COAD	Hypomethylated	GATA4	12	3.50839e-08	0.29992	1
shared	COAD	Hypomethylated	FOXM1	137	7.17469e-09	0.631208	1
shared	COAD	Hypomethylated	ELK4	8	1.84597e-09	0.219636	1
shared	COAD	Hypomethylated	ZFX	25	3.84188e-12	0.330017	1
shared	COAD	Hypomethylated	KMT2A	23	3.46444e-12	0.317284	1
shared	COAD	Hypomethylated	ANDR	422	4.64902e-13	0.681726	1
shared	COAD	Hypomethylated	REST	39	1.41129e-13	0.374575	1
shared	COAD	Hypomethylated	KLF5	95	9.22861e-14	0.502605	1
shared	COAD	Hypomethylated	SP1	238	0	0.434571	1
shared	COAD	Hypomethylated	PO5F1	142	0	0.50226	1
shared	COAD	Hypomethylated	TYY1	110	0	0.441382	1
shared	COAD	Hypomethylated	E2F1	117	0	0.268844	1
shared	COAD	Hypomethylated	ELF1	79	0	0.37086	1
shared	COAD	Hypomethylated	MYCN	56	0	0.371516	1
shared	COAD	Hypomethylated	KDM5B	75	0	0.28214	1
shared	COAD	Hypomethylated	CREB1	61	0	0.216037	1
shared	COAD	Hypomethylated	ZN143	35	0	0.305594	1
shared	COAD	Hypomethylated	ETV1	39	0	0.253884	1
shared	COAD	Hypomethylated	NRF1	34	0	0.184244	1
shared	COAD	Hypomethylated	FOXP1	23	0	0.236695	1
shared	COAD	Hypomethylated	TBP	25	0	0.185256	1
shared	COAD	Hypomethylated	NFYA	25	0	0.152124	1
shared	COAD	Hypomethylated	E2F4	5	0	0.0857979	1
shared	COAD	Hypomethylated	KDM5A	4	0	0.0555476	1
shared	COAD	Hypomethylated	ATRX	0	0	0	1
shared	COAD	Hypomethylated	CDX2	0	0	0	1
shared	COAD	Hypomethylated	KLF6	0	0	0	1
shared	COAD	Hypomethylated	PO2F1	0	0	0	1
shared	COAD	Hypomethylated	SNPC4	0	0	0	1
shared	COAD	Hypomethylated	SOX9	0	0	0	1
shared	COAD	Hypomethylated	ZN263	0	0	0	1
femaleAmplifier	HNSC	Hypomethylated	RUNX1	76	20.0525	6.5768	1.5835e-19
femaleAmplifier	HNSC	Hypomethylated	JUN	39	16.0832	6.76618	1.17006e-15
femaleAmplifier	HNSC	Hypomethylated	TBX21	22	14.8725	11.824	1.77816e-14
femaleAmplifier	HNSC	Hypomethylated	FOSL2	15	14.3406	21.8756	5.6844e-14
femaleAmplifier	HNSC	Hypomethylated	SPI1	64	13.7176	4.5312	2.2498e-13
femaleAmplifier	HNSC	Hypomethylated	FOS	30	13.6396	7.05428	2.56483e-13
femaleAmplifier	HNSC	Hypomethylated	JUND	26	12.9159	7.65235	1.16e-12
femaleAmplifier	HNSC	Hypomethylated	GATA2	34	11.4443	5.16102	3.01536e-11
femaleAmplifier	HNSC	Hypomethylated	FLI1	55	11.1685	3.93305	5.57657e-11
femaleAmplifier	HNSC	Hypomethylated	ATF3	25	11.0759	6.52511	6.63579e-11
femaleAmplifier	HNSC	Hypomethylated	MAX	64	11.0371	3.81462	7.11956e-11
femaleAmplifier	HNSC	Hypomethylated	TF65	59	10.3858	3.66885	2.96585e-10
femaleAmplifier	HNSC	Hypomethylated	GCR	42	10.1306	4.03436	5.15676e-10
femaleAmplifier	HNSC	Hypomethylated	TAL1	40	8.61515	3.61716	1.58253e-08
femaleAmplifier	HNSC	Hypomethylated	CEBPA	19	8.28458	6.02711	3.28355e-08
femaleAmplifier	HNSC	Hypomethylated	MYC	68	7.76379	3.02091	1.05676e-07
femaleAmplifier	HNSC	Hypomethylated	CEBPB	23	7.56404	4.57767	1.61748e-07
femaleAmplifier	HNSC	Hypomethylated	STAT1	29	7.5599	3.87853	1.61748e-07
femaleAmplifier	HNSC	Hypomethylated	HTF4	38	6.90631	3.13568	6.79943e-07
femaleAmplifier	HNSC	Hypomethylated	VDR	23	6.57057	3.99565	1.41639e-06
femaleAmplifier	HNSC	Hypomethylated	LYL1	9	6.2862	10.3783	2.62516e-06
femaleAmplifier	HNSC	Hypomethylated	TFE2	10	6.07557	8.40066	4.21169e-06
femaleAmplifier	HNSC	Hypomethylated	NKX21	20	6.05773	4.09869	4.33546e-06
femaleAmplifier	HNSC	Hypomethylated	PPARG	23	5.81573	3.58591	7.1389e-06
femaleAmplifier	HNSC	Hypomethylated	GATA1	38	5.63686	2.73656	1.05375e-05
femaleAmplifier	HNSC	Hypomethylated	ERG	30	5.19995	2.85386	2.73002e-05
femaleAmplifier	HNSC	Hypomethylated	RXRA	24	5.0574	3.12519	3.71253e-05
femaleAmplifier	HNSC	Hypomethylated	NFE2	12	4.94723	5.12649	4.6879e-05
femaleAmplifier	HNSC	Hypomethylated	ETS1	35	4.81275	2.5551	6.26284e-05
femaleAmplifier	HNSC	Hypomethylated	TFAP4	14	4.74266	4.25985	7.28762e-05
femaleAmplifier	HNSC	Hypomethylated	SMAD3	21	4.58083	3.12098	0.000103461
femaleAmplifier	HNSC	Hypomethylated	PRGR	33	4.57787	2.53141	0.000103461
femaleAmplifier	HNSC	Hypomethylated	SMAD1	14	4.53926	4.07459	0.000110968
femaleAmplifier	HNSC	Hypomethylated	BCL6	31	4.42692	2.53831	0.000142397
femaleAmplifier	HNSC	Hypomethylated	MYB	26	4.39634	2.71817	0.000150006
femaleAmplifier	HNSC	Hypomethylated	TEAD1	12	3.947	4.00464	0.000393514
femaleAmplifier	HNSC	Hypomethylated	P53	36	3.62859	2.16647	0.000798857
femaleAmplifier	HNSC	Hypomethylated	IRF1	17	3.60884	2.92899	0.000829173
femaleAmplifier	HNSC	Hypomethylated	TF7L2	16	3.59225	3.02154	0.000854451
femaleAmplifier	HNSC	Hypomethylated	ESR1	52	3.50283	1.99353	0.0010248
femaleAmplifier	HNSC	Hypomethylated	GATA3	20	3.49375	2.63166	0.00103436
femaleAmplifier	HNSC	Hypomethylated	KMT2B	23	3.49196	2.47154	0.00103436
femaleAmplifier	HNSC	Hypomethylated	NR2C2	8	3.06683	4.31154	0.00268993
femaleAmplifier	HNSC	Hypomethylated	P63	18	2.95711	2.47401	0.0034368
femaleAmplifier	HNSC	Hypomethylated	ANDR	51	2.91175	1.84683	0.00378654
femaleAmplifier	HNSC	Hypomethylated	HNF4A	16	2.90088	2.58141	0.00385353
femaleAmplifier	HNSC	Hypomethylated	MAF	8	2.82338	3.9381	0.00457226
femaleAmplifier	HNSC	Hypomethylated	TEAD4	10	2.81951	3.32181	0.00457925
femaleAmplifier	HNSC	Hypomethylated	SUH	19	2.80381	2.33693	0.0047131
femaleAmplifier	HNSC	Hypomethylated	AP2C	25	2.59187	2.02853	0.00746492
femaleAmplifier	HNSC	Hypomethylated	EGR2	8	2.5916	3.6044	0.00746492
femaleAmplifier	HNSC	Hypomethylated	FOXM1	24	2.53991	2.03305	0.00834908
femaleAmplifier	HNSC	Hypomethylated	CTCF	51	2.52566	1.74662	0.00856729
femaleAmplifier	HNSC	Hypomethylated	HIF1A	14	2.50717	2.49134	0.00887783
femaleAmplifier	HNSC	Hypomethylated	GRHL2	13	2.50224	2.58057	0.00891741
femaleAmplifier	HNSC	Hypomethylated	ASCL1	10	2.3443	2.83443	0.0125353
femaleAmplifier	HNSC	Hypomethylated	GABPA	25	2.34252	1.92992	0.0125353
femaleAmplifier	HNSC	Hypomethylated	NCOR1	16	2.32594	2.23773	0.0129363
femaleAmplifier	HNSC	Hypomethylated	STA5A	7	2.28114	3.50949	0.014247
femaleAmplifier	HNSC	Hypomethylated	UBF1	4	2.1881	5.64044	0.0171952
femaleAmplifier	HNSC	Hypomethylated	NCOR2	4	2.12393	5.40186	0.0196793
femaleAmplifier	HNSC	Hypomethylated	ZN143	14	1.9735	2.13784	0.0269669
femaleAmplifier	HNSC	Hypomethylated	NFKB1	3	1.83327	6.06267	0.0361293
femaleAmplifier	HNSC	Hypomethylated	EPAS1	2	1.64377	8.83405	0.0539543
femaleAmplifier	HNSC	Hypomethylated	FOXA1	36	1.58388	1.53336	0.060193
femaleAmplifier	HNSC	Hypomethylated	BACH2	4	1.55837	3.62472	0.063125
femaleAmplifier	HNSC	Hypomethylated	FOXO1	1	1.51405	32.8362	0.0683872
femaleAmplifier	HNSC	Hypomethylated	KLF4	7	1.47832	2.3968	0.0730601
femaleAmplifier	HNSC	Hypomethylated	MYCN	15	1.39296	1.73588	0.087066
femaleAmplifier	HNSC	Hypomethylated	RARA	9	1.34944	2.01391	0.0942679
femaleAmplifier	HNSC	Hypomethylated	COT2	3	1.29523	3.70755	0.106256
femaleAmplifier	HNSC	Hypomethylated	KDM5B	22	1.28791	1.53991	0.107515
femaleAmplifier	HNSC	Hypomethylated	AP2A	8	1.20705	1.96447	0.128214
femaleAmplifier	HNSC	Hypomethylated	NR1H3	1	1.17238	14.5737	0.138174
femaleAmplifier	HNSC	Hypomethylated	KLF5	17	1.17022	1.56009	0.138174
femaleAmplifier	HNSC	Hypomethylated	ZN263	1	1.16356	14.269	0.139616
femaleAmplifier	HNSC	Hypomethylated	BMAL1	3	1.10929	3.08854	0.156648
femaleAmplifier	HNSC	Hypomethylated	ELK4	5	1.08242	2.22299	0.165831
femaleAmplifier	HNSC	Hypomethylated	TYY1	20	1.00535	1.42979	0.194242
femaleAmplifier	HNSC	Hypomethylated	NFYA	14	0.957977	1.49526	0.213208
femaleAmplifier	HNSC	Hypomethylated	CREB1	21	0.930795	1.38254	0.224186
femaleAmplifier	HNSC	Hypermethylated	SIX2	15	2.41777	2.30531	0.226411
femaleAmplifier	HNSC	Hypomethylated	MITF	5	0.877793	1.90464	0.246409
femaleAmplifier	HNSC	Hypomethylated	FOXA2	6	0.837734	1.73335	0.2666
femaleAmplifier	HNSC	Hypomethylated	MEIS1	1	0.760229	5.29675	0.310374
femaleAmplifier	HNSC	Hypomethylated	E2F1	28	0.748424	1.25532	0.317546
femaleAmplifier	HNSC	Hypomethylated	REST	9	0.707347	1.4332	0.347379
femaleAmplifier	HNSC	Hypomethylated	PAX5	4	0.701101	1.7687	0.349562
femaleAmplifier	HNSC	Hypomethylated	ELF1	16	0.695981	1.30124	0.352203
femaleAmplifier	HNSC	Hypomethylated	GATA6	9	0.68126	1.40964	0.361272
femaleAmplifier	HNSC	Hypomethylated	ETV1	12	0.662943	1.32966	0.375251
femaleAmplifier	HNSC	Hypomethylated	MYBB	1	0.654457	4.0305	0.381054
femaleAmplifier	HNSC	Hypomethylated	COE1	2	0.59809	2.08813	0.423239
femaleAmplifier	HNSC	Hypomethylated	KDM5A	6	0.537726	1.36303	0.479196
femaleAmplifier	HNSC	Hypomethylated	E2F4	5	0.528953	1.40077	0.480582
femaleAmplifier	HNSC	Hypomethylated	ZBT17	6	0.523128	1.34512	0.484184
femaleAmplifier	HNSC	Hypomethylated	IRF2	1	0.519159	2.79889	0.484184
femaleAmplifier	HNSC	Hypomethylated	TBP	10	0.518898	1.24431	0.484184
femaleAmplifier	HNSC	Hypomethylated	NCOA1	2	0.451424	1.62009	0.552666
femaleAmplifier	HNSC	Hypomethylated	SIX2	5	0.441051	1.27739	0.56388
femaleAmplifier	HNSC	Hypomethylated	KLF1	2	0.418967	1.52491	0.586629
femaleAmplifier	HNSC	Hypomethylated	FOXP1	7	0.404345	1.1779	0.602206
femaleAmplifier	HNSC	Hypomethylated	FOXK1	1	0.362437	1.76937	0.655897
femaleAmplifier	HNSC	Hypomethylated	KDM5C	3	0.355163	1.23758	0.664532
femaleAmplifier	HNSC	Hypomethylated	PO5F1	17	0.295469	1.02318	0.748734
femaleAmplifier	HNSC	Hypermethylated	PDX1	4	1.68711	3.95087	0.767968
femaleAmplifier	HNSC	Hypomethylated	NRF1	11	0.271125	1.00895	0.780671
femaleAmplifier	HNSC	Hypomethylated	KMT2A	4	0.169841	0.868913	0.942277
femaleAmplifier	HNSC	Hypomethylated	ZFX	4	0.149151	0.830037	0.975034
femaleAmplifier	HNSC	Hypomethylated	GATA4	2	0.140658	0.785231	0.987682
femaleAmplifier	HNSC	Hypermethylated	FOXA2	11	1.34697	1.84814	1
femaleAmplifier	HNSC	Hypermethylated	ERR1	9	1.31051	1.95515	1
femaleAmplifier	HNSC	Hypermethylated	NKX31	3	1.03426	2.84531	1
femaleAmplifier	HNSC	Hypermethylated	NR1H3	1	0.94599	8.40542	1
femaleAmplifier	HNSC	Hypermethylated	TEAD1	9	0.934793	1.62152	1
femaleAmplifier	HNSC	Hypermethylated	FOXA1	53	0.875118	1.21553	1
femaleAmplifier	HNSC	Hypermethylated	PRDM1	1	0.472574	2.44827	1
femaleAmplifier	HNSC	Hypermethylated	PRGR	30	0.455209	1.0976	1
femaleAmplifier	HNSC	Hypermethylated	ANDR	63	0.382023	1.04535	1
femaleAmplifier	HNSC	Hypermethylated	GATA2	15	0.239281	0.974705	1
femaleAmplifier	HNSC	Hypermethylated	HNF4A	11	0.195399	0.928108	1
femaleAmplifier	HNSC	Hypermethylated	NKX21	9	0.18421	0.910624	1
femaleAmplifier	HNSC	Hypermethylated	NCOR2	1	0.13397	0.755451	1
femaleAmplifier	HNSC	Hypermethylated	COT2	1	0.118258	0.698568	1
femaleAmplifier	HNSC	Hypermethylated	GATA6	9	0.095592	0.785611	1
femaleAmplifier	HNSC	Hypermethylated	TEAD4	4	0.0913237	0.711921	1
femaleAmplifier	HNSC	Hypermethylated	GATA4	3	0.088671	0.680448	1
femaleAmplifier	HNSC	Hypermethylated	NANOG	8	0.0761124	0.741188	1
femaleAmplifier	HNSC	Hypermethylated	AP2A	5	0.066336	0.6756	1
femaleAmplifier	HNSC	Hypermethylated	ESR1	53	0.0605514	0.84367	1
femaleAmplifier	HNSC	Hypermethylated	KLF1	1	0.0461486	0.435476	1
femaleAmplifier	HNSC	Hypermethylated	ESR2	1	0.0409928	0.414968	1
femaleAmplifier	HNSC	Hypermethylated	MITF	2	0.0234037	0.424824	1
femaleAmplifier	HNSC	Hypermethylated	AP2C	17	0.0183625	0.672699	1
femaleAmplifier	HNSC	Hypermethylated	ASCL1	3	0.0180667	0.453064	1
femaleAmplifier	HNSC	Hypermethylated	GRHL2	5	0.0172388	0.518135	1
femaleAmplifier	HNSC	Hypermethylated	GATA3	9	0.0151941	0.584876	1
femaleAmplifier	HNSC	Hypermethylated	GCR	17	0.00926202	0.628849	1
femaleAmplifier	HNSC	Hypermethylated	CEBPB	5	0.00837087	0.46336	1
femaleAmplifier	HNSC	Hypermethylated	EGR2	1	0.00723513	0.242305	1
femaleAmplifier	HNSC	Hypermethylated	ZBT17	3	0.00628003	0.373445	1
femaleAmplifier	HNSC	Hypermethylated	TFAP4	2	0.00530737	0.308847	1
femaleAmplifier	HNSC	Hypermethylated	P63	7	0.00515098	0.480688	1
femaleAmplifier	HNSC	Hypermethylated	SOX2	10	0.0049571	0.527393	1
femaleAmplifier	HNSC	Hypermethylated	NFE2	1	0.00480909	0.220259	1
femaleAmplifier	HNSC	Hypermethylated	TF7L2	4	0.00339389	0.379397	1
femaleAmplifier	HNSC	Hypermethylated	CTCF	48	0.00247277	0.669393	1
femaleAmplifier	HNSC	Hypermethylated	KLF4	1	0.00212002	0.186088	1
femaleAmplifier	HNSC	Hypermethylated	KLF5	10	0.00151231	0.471854	1
femaleAmplifier	HNSC	Hypermethylated	JARD2	9	0.00121634	0.448452	1
femaleAmplifier	HNSC	Hypermethylated	PPARG	5	0.0011449	0.363053	1
femaleAmplifier	HNSC	Hypermethylated	ATF3	2	0.000879829	0.233151	1
femaleAmplifier	HNSC	Hypermethylated	SMAD4	1	0.000804258	0.157053	1
femaleAmplifier	HNSC	Hypermethylated	CEBPA	1	0.000636149	0.151318	1
femaleAmplifier	HNSC	Hypermethylated	HIF1A	3	0.000622623	0.272594	1
femaleAmplifier	HNSC	Hypermethylated	SMAD1	1	0.000524867	0.146913	1
femaleAmplifier	HNSC	Hypermethylated	PO5F1	15	0.000377406	0.478095	1
femaleAmplifier	HNSC	Hypermethylated	JUND	1	0.000210944	0.129047	1
femaleAmplifier	HNSC	Hypermethylated	VDR	3	0.000188475	0.239952	1
femaleAmplifier	HNSC	Hypermethylated	FOXP1	2	0.000120758	0.183965	1
femaleAmplifier	HNSC	Hypermethylated	RARA	1	0.000113689	0.119176	1
femaleAmplifier	HNSC	Hypermethylated	ERG	9	0.000112732	0.373585	1
femaleAmplifier	HNSC	Hypermethylated	REST	2	5.74293e-05	0.170562	1
femaleAmplifier	HNSC	Hypermethylated	RXRA	4	3.25859e-05	0.238328	1
femaleAmplifier	HNSC	Hypermethylated	FOS	1	2.00795e-05	0.0980119	1
femaleAmplifier	HNSC	Hypermethylated	SP1	29	1.55732e-05	0.482828	1
femaleAmplifier	HNSC	Hypermethylated	SMAD3	2	5.85624e-06	0.139411	1
femaleAmplifier	HNSC	Hypermethylated	JUN	2	1.95969e-06	0.128179	1
femaleAmplifier	HNSC	Hypermethylated	ZN143	1	1.47633e-06	0.0771428	1
femaleAmplifier	HNSC	Hypermethylated	GATA1	10	3.08493e-07	0.282782	1
femaleAmplifier	HNSC	Hypermethylated	MYC	37	9.24964e-08	0.427442	1
femaleAmplifier	HNSC	Hypermethylated	SPI1	19	5.94063e-08	0.3441	1
femaleAmplifier	HNSC	Hypermethylated	SUH	1	3.4071e-08	0.058762	1
femaleAmplifier	HNSC	Hypermethylated	MAX	23	2.98748e-08	0.359496	1
femaleAmplifier	HNSC	Hypermethylated	STAT1	1	1.83887e-08	0.0565317	1
femaleAmplifier	HNSC	Hypermethylated	TAL1	5	8.46371e-09	0.167429	1
femaleAmplifier	HNSC	Hypermethylated	BCL6	4	2.10041e-09	0.137083	1
femaleAmplifier	HNSC	Hypermethylated	CREB1	5	1.93085e-09	0.157074	1
femaleAmplifier	HNSC	Hypermethylated	NRF1	1	1.0012e-09	0.0478739	1
femaleAmplifier	HNSC	Hypermethylated	FOXM1	2	2.39115e-10	0.0766763	1
femaleAmplifier	HNSC	Hypermethylated	TYY1	3	2.13222e-10	0.102387	1
femaleAmplifier	HNSC	Hypermethylated	TF65	14	5.20289e-11	0.241823	1
femaleAmplifier	HNSC	Hypermethylated	E2F1	10	3.54408e-11	0.201993	1
femaleAmplifier	HNSC	Hypermethylated	GABPA	2	2.09204e-11	0.0690216	1
femaleAmplifier	HNSC	Hypermethylated	P53	6	6.91076e-12	0.142654	1
femaleAmplifier	HNSC	Hypermethylated	KDM5B	1	1.40647e-13	0.0323061	1
femaleAmplifier	HNSC	Hypermethylated	HTF4	1	3.91035e-14	0.0308196	1
femaleAmplifier	HNSC	Hypermethylated	ETS1	1	4.05018e-15	0.028474	1
femaleAmplifier	HNSC	Hypermethylated	RUNX1	9	9.64327e-17	0.13409	1
femaleAmplifier	HNSC	Hypermethylated	FLI1	3	0	0.0606965	1
femaleAmplifier	HNSC	Hypermethylated	ARNT	0	0	0	1
femaleAmplifier	HNSC	Hypermethylated	ATF4	0	0	0	1
femaleAmplifier	HNSC	Hypermethylated	ATRX	0	0	0	1
femaleAmplifier	HNSC	Hypermethylated	BACH2	0	0	0	1
femaleAmplifier	HNSC	Hypermethylated	BMAL1	0	0	0	1
femaleAmplifier	HNSC	Hypermethylated	CDX2	0	0	0	1
femaleAmplifier	HNSC	Hypermethylated	COE1	0	0	0	1
femaleAmplifier	HNSC	Hypermethylated	DUX4	0	0	0	1
femaleAmplifier	HNSC	Hypermethylated	E2F4	0	0	0	1
femaleAmplifier	HNSC	Hypermethylated	ELF1	0	0	0	1
femaleAmplifier	HNSC	Hypermethylated	ELK4	0	0	0	1
femaleAmplifier	HNSC	Hypermethylated	EPAS1	0	0	0	1
femaleAmplifier	HNSC	Hypermethylated	ETV1	0	0	0	1
femaleAmplifier	HNSC	Hypermethylated	FOSL2	0	0	0	1
femaleAmplifier	HNSC	Hypermethylated	FOXK1	0	0	0	1
femaleAmplifier	HNSC	Hypermethylated	FOXO1	0	0	0	1
femaleAmplifier	HNSC	Hypermethylated	HSF1	0	0	0	1
femaleAmplifier	HNSC	Hypermethylated	IKZF1	0	0	0	1
femaleAmplifier	HNSC	Hypermethylated	IRF1	0	0	0	1
femaleAmplifier	HNSC	Hypermethylated	IRF2	0	0	0	1
femaleAmplifier	HNSC	Hypermethylated	KDM5A	0	0	0	1
femaleAmplifier	HNSC	Hypermethylated	KDM5C	0	0	0	1
femaleAmplifier	HNSC	Hypermethylated	KLF6	0	0	0	1
femaleAmplifier	HNSC	Hypermethylated	KMT2A	0	0	0	1
femaleAmplifier	HNSC	Hypermethylated	KMT2B	0	0	0	1
femaleAmplifier	HNSC	Hypermethylated	LEF1	0	0	0	1
femaleAmplifier	HNSC	Hypermethylated	LYL1	0	0	0	1
femaleAmplifier	HNSC	Hypermethylated	MAF	0	0	0	1
femaleAmplifier	HNSC	Hypermethylated	MEIS1	0	0	0	1
femaleAmplifier	HNSC	Hypermethylated	MYBB	0	0	0	1
femaleAmplifier	HNSC	Hypermethylated	MYB	0	0	0	1
femaleAmplifier	HNSC	Hypermethylated	MYCN	0	0	0	1
femaleAmplifier	HNSC	Hypermethylated	NCOA1	0	0	0	1
femaleAmplifier	HNSC	Hypermethylated	NCOR1	0	0	0	1
femaleAmplifier	HNSC	Hypermethylated	NFKB1	0	0	0	1
femaleAmplifier	HNSC	Hypermethylated	NFYA	0	0	0	1
femaleAmplifier	HNSC	Hypermethylated	NR2C2	0	0	0	1
femaleAmplifier	HNSC	Hypermethylated	OTX2	0	0	0	1
femaleAmplifier	HNSC	Hypermethylated	PAX5	0	0	0	1
femaleAmplifier	HNSC	Hypermethylated	PAX6	0	0	0	1
femaleAmplifier	HNSC	Hypermethylated	PO2F1	0	0	0	1
femaleAmplifier	HNSC	Hypermethylated	PRD14	0	0	0	1
femaleAmplifier	HNSC	Hypermethylated	SMAD2	0	0	0	1
femaleAmplifier	HNSC	Hypermethylated	SMRC1	0	0	0	1
femaleAmplifier	HNSC	Hypermethylated	SNPC4	0	0	0	1
femaleAmplifier	HNSC	Hypermethylated	SOX9	0	0	0	1
femaleAmplifier	HNSC	Hypermethylated	STA5A	0	0	0	1
femaleAmplifier	HNSC	Hypermethylated	STAT3	0	0	0	1
femaleAmplifier	HNSC	Hypermethylated	STAT4	0	0	0	1
femaleAmplifier	HNSC	Hypermethylated	TBP	0	0	0	1
femaleAmplifier	HNSC	Hypermethylated	TBX21	0	0	0	1
femaleAmplifier	HNSC	Hypermethylated	TFE2	0	0	0	1
femaleAmplifier	HNSC	Hypermethylated	UBF1	0	0	0	1
femaleAmplifier	HNSC	Hypermethylated	ZFX	0	0	0	1
femaleAmplifier	HNSC	Hypermethylated	ZN263	0	0	0	1
femaleAmplifier	HNSC	Hypomethylated	NANOG	5	0.128645	0.802727	1
femaleAmplifier	HNSC	Hypomethylated	STAT3	1	0.123812	0.719439	1
femaleAmplifier	HNSC	Hypomethylated	SP1	27	0.121956	0.8766	1
femaleAmplifier	HNSC	Hypomethylated	ERR1	2	0.118367	0.726407	1
femaleAmplifier	HNSC	Hypomethylated	PRD14	1	0.10859	0.664488	1
femaleAmplifier	HNSC	Hypomethylated	SMAD2	1	0.0963234	0.620425	1
femaleAmplifier	HNSC	Hypomethylated	SOX2	8	0.0794236	0.744995	1
femaleAmplifier	HNSC	Hypomethylated	IKZF1	1	0.0789311	0.557784	1
femaleAmplifier	HNSC	Hypomethylated	HSF1	2	0.0416726	0.497473	1
femaleAmplifier	HNSC	Hypomethylated	SMAD4	1	0.011503	0.272255	1
femaleAmplifier	HNSC	Hypomethylated	JARD2	3	0.000358463	0.252546	1
femaleAmplifier	HNSC	Hypomethylated	ARNT	0	0	0	1
femaleAmplifier	HNSC	Hypomethylated	ATF4	0	0	0	1
femaleAmplifier	HNSC	Hypomethylated	ATRX	0	0	0	1
femaleAmplifier	HNSC	Hypomethylated	CDX2	0	0	0	1
femaleAmplifier	HNSC	Hypomethylated	DUX4	0	0	0	1
femaleAmplifier	HNSC	Hypomethylated	ESR2	0	0	0	1
femaleAmplifier	HNSC	Hypomethylated	KLF6	0	0	0	1
femaleAmplifier	HNSC	Hypomethylated	LEF1	0	0	0	1
femaleAmplifier	HNSC	Hypomethylated	NKX31	0	0	0	1
femaleAmplifier	HNSC	Hypomethylated	OTX2	0	0	0	1
femaleAmplifier	HNSC	Hypomethylated	PAX6	0	0	0	1
femaleAmplifier	HNSC	Hypomethylated	PDX1	0	0	0	1
femaleAmplifier	HNSC	Hypomethylated	PO2F1	0	0	0	1
femaleAmplifier	HNSC	Hypomethylated	PRDM1	0	0	0	1
femaleAmplifier	HNSC	Hypomethylated	SMRC1	0	0	0	1
femaleAmplifier	HNSC	Hypomethylated	SNPC4	0	0	0	1
femaleAmplifier	HNSC	Hypomethylated	SOX9	0	0	0	1
femaleAmplifier	HNSC	Hypomethylated	STAT4	0	0	0	1
maleAmplifier	HNSC	Hypomethylated	RUNX1	249	22.9638	2.47019	2.28141e-22
maleAmplifier	HNSC	Hypomethylated	TEAD1	61	18.2808	4.27046	8.27989e-18
maleAmplifier	HNSC	Hypomethylated	SPI1	212	15.254	2.11037	7.63417e-15
maleAmplifier	HNSC	Hypomethylated	JUN	95	14.0861	2.65756	9.91494e-14
maleAmplifier	HNSC	Hypomethylated	MYB	114	13.5793	2.40552	2.84917e-13
maleAmplifier	HNSC	Hypomethylated	NKX21	73	13.3311	2.94359	4.91644e-13
maleAmplifier	HNSC	Hypomethylated	TBX21	43	12.9965	4.15712	1.02434e-12
maleAmplifier	HNSC	Hypomethylated	FLI1	183	12.9906	2.03652	1.02434e-12
maleAmplifier	HNSC	Hypomethylated	TEAD4	51	12.6005	3.54766	2.34386e-12
maleAmplifier	HNSC	Hypomethylated	MYC	269	12.0338	1.87797	8.44929e-12
maleAmplifier	HNSC	Hypomethylated	LYL1	26	11.6415	6.02892	2.03969e-11
maleAmplifier	HNSC	Hypomethylated	TF65	202	11.5988	1.91191	2.20262e-11
maleAmplifier	HNSC	Hypomethylated	GATA3	90	11.4485	2.42335	3.01536e-11
maleAmplifier	HNSC	Hypomethylated	MAX	218	11.1582	1.86369	5.59911e-11
maleAmplifier	HNSC	Hypomethylated	CEBPA	49	9.42916	2.9314	2.54994e-09
maleAmplifier	HNSC	Hypomethylated	TAL1	126	9.26658	1.95489	3.64695e-09
maleAmplifier	HNSC	Hypomethylated	BCL6	123	9.04261	1.94891	6.00956e-09
maleAmplifier	HNSC	Hypomethylated	HTF4	128	8.43042	1.87671	2.38365e-08
maleAmplifier	HNSC	Hypomethylated	RARA	53	7.93205	2.51718	7.28193e-08
maleAmplifier	HNSC	Hypomethylated	TF7L2	61	7.61934	2.30744	1.45208e-07
maleAmplifier	HNSC	Hypomethylated	JUND	49	7.33401	2.49811	2.61802e-07
maleAmplifier	HNSC	Hypomethylated	SMAD3	73	7.33255	2.10785	2.61802e-07
maleAmplifier	HNSC	Hypomethylated	GCR	116	7.09799	1.80606	4.43221e-07
maleAmplifier	HNSC	Hypomethylated	TFE2	23	6.7976	3.80994	8.50644e-07
maleAmplifier	HNSC	Hypomethylated	ATF3	49	6.04281	2.24374	4.43361e-06
maleAmplifier	HNSC	Hypomethylated	ERG	100	5.95056	1.76027	5.41833e-06
maleAmplifier	HNSC	Hypomethylated	NCOR2	16	5.8239	4.47202	7.08627e-06
maleAmplifier	HNSC	Hypomethylated	FOS	54	5.79575	2.1124	7.39102e-06
maleAmplifier	HNSC	Hypomethylated	GRHL2	52	5.52367	2.09413	1.35248e-05
maleAmplifier	HNSC	Hypomethylated	BACH2	19	5.3853	3.5814	1.83974e-05
maleAmplifier	HNSC	Hypomethylated	ETS1	122	5.33933	1.62644	2.00163e-05
maleAmplifier	HNSC	Hypomethylated	KLF5	89	5.16042	1.72426	2.95901e-05
maleAmplifier	HNSC	Hypomethylated	CEBPB	54	4.88537	1.953	5.35142e-05
maleAmplifier	HNSC	Hypomethylated	SMAD1	38	4.54705	2.15309	0.000110024
maleAmplifier	HNSC	Hypomethylated	GATA2	70	4.4116	1.73497	0.000146155
maleAmplifier	HNSC	Hypomethylated	FOXA1	168	4.29582	1.46116	0.00018737
maleAmplifier	HNSC	Hypomethylated	CTCF	220	4.27209	1.42466	0.000196127
maleAmplifier	HNSC	Hypomethylated	MITF	29	4.19561	2.31928	0.000229788
maleAmplifier	HNSC	Hypomethylated	P53	133	4.02651	1.48283	0.000330484
maleAmplifier	HNSC	Hypomethylated	SUH	69	3.92491	1.67169	0.000410566
maleAmplifier	HNSC	Hypomethylated	STA5A	23	3.54675	2.3427	0.000941167
maleAmplifier	HNSC	Hypomethylated	GABPA	99	3.53944	1.50324	0.000949485
maleAmplifier	HNSC	Hypomethylated	IRF1	50	3.07025	1.66397	0.00268938
maleAmplifier	HNSC	Hypomethylated	VDR	51	2.77052	1.59864	0.00501536
maleAmplifier	HNSC	Hypomethylated	TFAP4	30	2.41339	1.74632	0.0107928
maleAmplifier	HNSC	Hypomethylated	KMT2B	70	2.25668	1.41603	0.0149732
maleAmplifier	HNSC	Hypomethylated	AP2C	88	2.24778	1.36768	0.0151835
maleAmplifier	HNSC	Hypomethylated	GATA1	109	2.21719	1.3279	0.0161856
maleAmplifier	HNSC	Hypomethylated	SOX2	68	2.13014	1.40191	0.0195243
maleAmplifier	HNSC	Hypomethylated	PRGR	98	2.09779	1.3289	0.0205762
maleAmplifier	HNSC	Hypomethylated	ZBT17	34	2.09636	1.59942	0.0205762
maleAmplifier	HNSC	Hypomethylated	FOXO1	2	1.99773	13.7007	0.0256619
maleAmplifier	HNSC	Hypomethylated	RXRA	59	1.90685	1.39379	0.0312469
maleAmplifier	HNSC	Hypomethylated	NFKB1	7	1.90378	2.89542	0.0312767
maleAmplifier	HNSC	Hypomethylated	MEIS1	4	1.84734	4.40719	0.0354013
maleAmplifier	HNSC	Hypomethylated	STAT1	60	1.79812	1.36986	0.0389418
maleAmplifier	HNSC	Hypomethylated	NR2C2	17	1.77489	1.81788	0.0408379
maleAmplifier	HNSC	Hypomethylated	NCOR1	51	1.75384	1.39591	0.0426145
maleAmplifier	HNSC	Hypomethylated	COT2	9	1.68999	2.28497	0.049075
maleAmplifier	HNSC	Hypomethylated	HNF4A	45	1.65305	1.40243	0.0531206
maleAmplifier	HNSC	Hypomethylated	BMAL1	10	1.62436	2.11921	0.0560964
maleAmplifier	HNSC	Hypomethylated	FOXM1	80	1.62178	1.28951	0.0561075
maleAmplifier	HNSC	Hypomethylated	KLF4	23	1.61506	1.59852	0.0564613
maleAmplifier	HNSC	Hypomethylated	ESR1	188	1.61412	1.20497	0.0564613
maleAmplifier	HNSC	Hypomethylated	NFE2	20	1.56185	1.63532	0.0629703
maleAmplifier	HNSC	Hypomethylated	PRDM1	4	1.5388	3.52764	0.0656687
maleAmplifier	HNSC	Hypomethylated	SIX2	28	1.52742	1.49697	0.0670428
maleAmplifier	HNSC	Hypomethylated	TYY1	87	1.52044	1.2619	0.0677566
maleAmplifier	HNSC	Hypomethylated	IRF2	5	1.50259	2.91189	0.0698368
maleAmplifier	HNSC	Hypomethylated	PAX5	18	1.48701	1.64813	0.0719983
maleAmplifier	HNSC	Hypomethylated	PPARG	48	1.4481	1.34128	0.077497
maleAmplifier	HNSC	Hypomethylated	ELF1	75	1.3939	1.25951	0.087066
maleAmplifier	HNSC	Hypomethylated	NCOA1	11	1.38371	1.85583	0.0884763
maleAmplifier	HNSC	Hypomethylated	FOSL2	8	1.3806	2.10225	0.0886503
maleAmplifier	HNSC	Hypomethylated	P63	50	1.35265	1.31191	0.0940564
maleAmplifier	HNSC	Hypomethylated	NANOG	38	1.13502	1.30349	0.148364
maleAmplifier	HNSC	Hypomethylated	IKZF1	13	1.02847	1.53052	0.18506
maleAmplifier	HNSC	Hypomethylated	ARNT	3	0.981109	2.68287	0.204415
maleAmplifier	HNSC	Hypomethylated	FOXP1	36	0.971098	1.26307	0.20819
maleAmplifier	HNSC	Hypomethylated	GATA4	17	0.956658	1.40624	0.213208
maleAmplifier	HNSC	Hypomethylated	ERR1	18	0.933729	1.38019	0.223717
maleAmplifier	HNSC	Hypomethylated	CDX2	1	0.924163	8.00624	0.226582
maleAmplifier	HNSC	Hypomethylated	MYBB	3	0.915625	2.50311	0.230015
maleAmplifier	HNSC	Hypomethylated	KDM5B	84	0.904807	1.15674	0.234735
maleAmplifier	HNSC	Hypomethylated	HIF1A	36	0.900326	1.24071	0.236087
maleAmplifier	HNSC	Hypomethylated	MYCN	52	0.884293	1.19316	0.243852
maleAmplifier	HNSC	Hypomethylated	KDM5C	16	0.868561	1.37419	0.250569
maleAmplifier	HNSC	Hypomethylated	PO5F1	89	0.790936	1.12992	0.295159
maleAmplifier	HNSC	Hypomethylated	ZN143	40	0.789677	1.19307	0.295159
maleAmplifier	HNSC	Hypomethylated	KMT2A	27	0.779546	1.23662	0.300794
maleAmplifier	HNSC	Hypomethylated	EGR2	15	0.774293	1.33496	0.303119
maleAmplifier	HNSC	Hypomethylated	ZFX	28	0.769015	1.22758	0.305486
maleAmplifier	HNSC	Hypomethylated	ETV1	50	0.645203	1.1298	0.387639
maleAmplifier	HNSC	Hypomethylated	ELK4	14	0.639335	1.26489	0.391282
maleAmplifier	HNSC	Hypomethylated	AP2A	24	0.627733	1.18592	0.398568
maleAmplifier	HNSC	Hypomethylated	MAF	13	0.611348	1.2586	0.412196
maleAmplifier	HNSC	Hypomethylated	REST	35	0.589106	1.13589	0.430329
maleAmplifier	HNSC	Hypomethylated	FOXA2	20	0.570097	1.17681	0.447762
maleAmplifier	HNSC	Hypomethylated	ZN263	1	0.537129	2.93331	0.479196
maleAmplifier	HNSC	Hypomethylated	FOXK1	4	0.531991	1.46651	0.480582
maleAmplifier	HNSC	Hypomethylated	TBP	43	0.520026	1.09762	0.484184
maleAmplifier	HNSC	Hypomethylated	KLF1	8	0.512919	1.26153	0.488994
maleAmplifier	HNSC	Hypomethylated	ATF4	2	0.494547	1.74065	0.508153
maleAmplifier	HNSC	Hypomethylated	ESR2	8	0.452606	1.202	0.552666
maleAmplifier	HNSC	Hypomethylated	STAT3	8	0.452606	1.202	0.552666
maleAmplifier	HNSC	Hypomethylated	SMAD4	19	0.433893	1.10447	0.571088
maleAmplifier	HNSC	Hypomethylated	CREB1	80	0.401897	1.03864	0.603366
maleAmplifier	HNSC	Hypomethylated	E2F1	116	0.378996	1.02692	0.633689
maleAmplifier	HNSC	Hypomethylated	NRF1	53	0.302338	1.00836	0.739645
maleAmplifier	HNSC	Hypomethylated	OTX2	1	0.285993	1.37557	0.761754
maleAmplifier	HNSC	Hypomethylated	NFYA	47	0.271691	0.995135	0.780671
maleAmplifier	HNSC	Hypomethylated	PDX1	3	0.259649	1.04228	0.798741
maleAmplifier	HNSC	Hypomethylated	GATA6	31	0.246283	0.981033	0.820806
maleAmplifier	HNSC	Hypomethylated	NKX31	3	0.241869	1.00705	0.826281
maleAmplifier	HNSC	Hypomethylated	PRD14	7	0.233681	0.969111	0.836139
maleAmplifier	HNSC	Hypomethylated	ASCL1	17	0.194213	0.935701	0.909349
maleAmplifier	HNSC	Hypomethylated	ANDR	167	0.182759	0.966573	0.930433
maleAmplifier	HNSC	Hypomethylated	KDM5A	20	0.177688	0.925105	0.938125
maleAmplifier	HNSC	Hypomethylated	E2F4	16	0.172885	0.914347	0.939722
maleAmplifier	HNSC	Hypomethylated	EPAS1	1	0.172495	0.89797	0.939722
maleAmplifier	HNSC	Hypomethylated	LEF1	4	0.164077	0.857102	0.950156
maleAmplifier	HNSC	Hypomethylated	UBF1	3	0.163291	0.847782	0.950156
maleAmplifier	HNSC	Hypermethylated	JARD2	169	0.644494	1.06643	1
maleAmplifier	HNSC	Hypermethylated	MEIS1	4	0.519224	1.44551	1
maleAmplifier	HNSC	Hypermethylated	OTX2	3	0.423368	1.36754	1
maleAmplifier	HNSC	Hypermethylated	FOSL2	11	0.212951	0.946326	1
maleAmplifier	HNSC	Hypermethylated	NR1H3	1	0.195101	0.98674	1
maleAmplifier	HNSC	Hypermethylated	PDX1	7	0.115779	0.802874	1
maleAmplifier	HNSC	Hypermethylated	ATF4	2	0.0638784	0.572497	1
maleAmplifier	HNSC	Hypermethylated	COE1	9	0.0259131	0.635133	1
maleAmplifier	HNSC	Hypermethylated	DUX4	1	0.0257084	0.34972	1
maleAmplifier	HNSC	Hypermethylated	COT2	7	0.0193819	0.577824	1
maleAmplifier	HNSC	Hypermethylated	ASCL1	43	0.0182719	0.778087	1
maleAmplifier	HNSC	Hypermethylated	EPAS1	1	0.0151015	0.295731	1
maleAmplifier	HNSC	Hypermethylated	PRDM1	1	0.0136763	0.287409	1
maleAmplifier	HNSC	Hypermethylated	NKX31	4	0.0090845	0.441598	1
maleAmplifier	HNSC	Hypermethylated	ERR1	28	0.00841605	0.696578	1
maleAmplifier	HNSC	Hypermethylated	NCOR2	5	0.00579769	0.44544	1
maleAmplifier	HNSC	Hypermethylated	LYL1	6	0.00278232	0.433701	1
maleAmplifier	HNSC	Hypermethylated	NFKB1	2	0.00218087	0.268434	1
maleAmplifier	HNSC	Hypermethylated	ESR2	10	0.001852	0.491119	1
maleAmplifier	HNSC	Hypermethylated	SIX2	38	0.000909824	0.649766	1
maleAmplifier	HNSC	Hypermethylated	UBF1	3	0.000657991	0.278469	1
maleAmplifier	HNSC	Hypermethylated	CEBPA	34	0.000509494	0.619046	1
maleAmplifier	HNSC	Hypermethylated	PPARG	81	0.000383326	0.714746	1
maleAmplifier	HNSC	Hypermethylated	GATA2	96	0.00024	0.722635	1
maleAmplifier	HNSC	Hypermethylated	BMAL1	4	0.000135537	0.274156	1
maleAmplifier	HNSC	Hypermethylated	FOXK1	1	0.000106522	0.119798	1
maleAmplifier	HNSC	Hypermethylated	TEAD4	25	5.86375e-05	0.523061	1
maleAmplifier	HNSC	Hypermethylated	PRD14	7	2.62848e-05	0.316646	1
maleAmplifier	HNSC	Hypermethylated	TEAD1	24	1.85778e-05	0.493429	1
maleAmplifier	HNSC	Hypermethylated	TFE2	5	1.53248e-05	0.260324	1
maleAmplifier	HNSC	Hypermethylated	PRGR	180	1.31808e-05	0.737554	1
maleAmplifier	HNSC	Hypermethylated	CEBPB	53	5.47707e-06	0.585214	1
maleAmplifier	HNSC	Hypermethylated	FOXA2	23	8.28267e-07	0.435385	1
maleAmplifier	HNSC	Hypermethylated	BACH2	2	4.42396e-07	0.11919	1
maleAmplifier	HNSC	Hypermethylated	KLF1	3	3.44039e-07	0.153641	1
maleAmplifier	HNSC	Hypermethylated	LEF1	1	3.00982e-07	0.0700699	1
maleAmplifier	HNSC	Hypermethylated	AP2A	28	1.59018e-07	0.442952	1
maleAmplifier	HNSC	Hypermethylated	STAT3	3	1.45449e-07	0.1464	1
maleAmplifier	HNSC	Hypermethylated	MITF	13	1.25023e-07	0.32537	1
maleAmplifier	HNSC	Hypermethylated	NCOA1	2	9.78105e-08	0.108716	1
maleAmplifier	HNSC	Hypermethylated	SMAD2	4	6.3698e-08	0.168473	1
maleAmplifier	HNSC	Hypermethylated	NFE2	11	3.20822e-08	0.286625	1
maleAmplifier	HNSC	Hypermethylated	IKZF1	4	6.26405e-09	0.151452	1
maleAmplifier	HNSC	Hypermethylated	P63	65	5.60641e-09	0.529938	1
maleAmplifier	HNSC	Hypermethylated	GATA3	69	1.78539e-09	0.527706	1
maleAmplifier	HNSC	Hypermethylated	SMAD1	19	1.02152e-09	0.332029	1
maleAmplifier	HNSC	Hypermethylated	GRHL2	34	6.15945e-10	0.414117	1
maleAmplifier	HNSC	Hypermethylated	TBX21	6	3.42072e-10	0.174809	1
maleAmplifier	HNSC	Hypermethylated	HNF4A	46	1.02856e-10	0.444273	1
maleAmplifier	HNSC	Hypermethylated	KLF4	10	3.55236e-11	0.219905	1
maleAmplifier	HNSC	Hypermethylated	GATA4	6	1.76747e-11	0.158588	1
maleAmplifier	HNSC	Hypermethylated	JUND	20	1.58261e-11	0.307151	1
maleAmplifier	HNSC	Hypermethylated	STA5A	3	8.54597e-12	0.09607	1
maleAmplifier	HNSC	Hypermethylated	GCR	132	7.1502e-12	0.572782	1
maleAmplifier	HNSC	Hypermethylated	TFAP4	13	2.22861e-12	0.236438	1
maleAmplifier	HNSC	Hypermethylated	NANOG	35	2.03435e-12	0.374811	1
maleAmplifier	HNSC	Hypermethylated	PAX5	3	4.85635e-13	0.0873447	1
maleAmplifier	HNSC	Hypermethylated	AP2C	117	3.15914e-13	0.537257	1
maleAmplifier	HNSC	Hypermethylated	EGR2	3	2.41612e-13	0.0854594	1
maleAmplifier	HNSC	Hypermethylated	SMAD4	10	4.40215e-14	0.185549	1
maleAmplifier	HNSC	Hypermethylated	ELK4	2	2.35778e-14	0.0579145	1
maleAmplifier	HNSC	Hypermethylated	MAF	1	6.75029e-15	0.0310671	1
maleAmplifier	HNSC	Hypermethylated	ATF3	18	5.8824e-15	0.24797	1
maleAmplifier	HNSC	Hypermethylated	KDM5C	2	3.71266e-15	0.0548214	1
maleAmplifier	HNSC	Hypermethylated	ZBT17	15	1.54292e-15	0.21895	1
maleAmplifier	HNSC	Hypermethylated	NKX21	24	7.71462e-16	0.27687	1
maleAmplifier	HNSC	Hypermethylated	ANDR	366	0	0.617166	1
maleAmplifier	HNSC	Hypermethylated	ESR1	339	0	0.580705	1
maleAmplifier	HNSC	Hypermethylated	CTCF	340	0	0.53017	1
maleAmplifier	HNSC	Hypermethylated	FOXA1	239	0	0.544466	1
maleAmplifier	HNSC	Hypermethylated	MYC	274	0	0.362426	1
maleAmplifier	HNSC	Hypermethylated	SPI1	161	0	0.344472	1
maleAmplifier	HNSC	Hypermethylated	SP1	167	0	0.309617	1
maleAmplifier	HNSC	Hypermethylated	ERG	80	0	0.393458	1
maleAmplifier	HNSC	Hypermethylated	TF65	145	0	0.301346	1
maleAmplifier	HNSC	Hypermethylated	GATA1	96	0	0.323171	1
maleAmplifier	HNSC	Hypermethylated	SOX2	61	0	0.374061	1
maleAmplifier	HNSC	Hypermethylated	P53	103	0	0.299684	1
maleAmplifier	HNSC	Hypermethylated	TAL1	79	0	0.320307	1
maleAmplifier	HNSC	Hypermethylated	MAX	148	0	0.263897	1
maleAmplifier	HNSC	Hypermethylated	RUNX1	137	0	0.251311	1
maleAmplifier	HNSC	Hypermethylated	FLI1	102	0	0.256564	1
maleAmplifier	HNSC	Hypermethylated	JUN	36	0	0.275946	1
maleAmplifier	HNSC	Hypermethylated	PO5F1	68	0	0.245642	1
maleAmplifier	HNSC	Hypermethylated	SMAD3	33	0	0.27457	1
maleAmplifier	HNSC	Hypermethylated	E2F1	66	0	0.155268	1
maleAmplifier	HNSC	Hypermethylated	GATA6	25	0	0.248951	1
maleAmplifier	HNSC	Hypermethylated	VDR	25	0	0.236045	1
maleAmplifier	HNSC	Hypermethylated	STAT1	26	0	0.175406	1
maleAmplifier	HNSC	Hypermethylated	HTF4	35	0	0.129368	1
maleAmplifier	HNSC	Hypermethylated	RXRA	24	0	0.167672	1
maleAmplifier	HNSC	Hypermethylated	TF7L2	21	0	0.233188	1
maleAmplifier	HNSC	Hypermethylated	BCL6	30	0	0.120974	1
maleAmplifier	HNSC	Hypermethylated	ETS1	33	0	0.112515	1
maleAmplifier	HNSC	Hypermethylated	MYB	24	0	0.131306	1
maleAmplifier	HNSC	Hypermethylated	GABPA	27	0	0.110644	1
[truncated: 5,262 more rows]

## Sheet: HOMER
factor	Consensus	P-value	# of Target Sequences with Motif(of 17)	% of Target Sequences with Motif	# of Background Sequences with Motif(of 46240)	% of Background Sequences with Motif	Group	Cancer
Gfi1b	MAATCACTGC	0.01	6	0.3529	3796.3	0.0821	male-amplifier	LIHC
Gata1	SAGATAAGRV	0.01	4	0.2353	2381.5	0.0515	male-amplifier	LIHC
Tcfcp2l1	NRAACCRGTTYRAACCRGYT	0.001	2	0.5	1193.3	0.0108	male-amplifier	THCA
Tcf7	CTTTGATGTGSB	0.01	2	0.5	2955.7	0.0266	male-amplifier	THCA
Rfx6	TGTTKCCTAGCAACM	0.01	19	0.2289	5275.3	0.1088	male-amplifier	LUSC
E2F1	CWGGCGGGAA	0.01	11	0.1325	2235.7	0.0461	male-amplifier	LUSC
Sox7	VVRRAACAATGG	0.01	6	0.0723	882.5	0.0182	male-amplifier	LUSC
GLI3	CGTGGGTGGTCC	0.01	5	0.0602	630	0.013	male-amplifier	LUSC
THRb	GGTCACCTGAGGTCA	0.01	7	0.35	4245.3	0.0878	male-amplifier	LUAD
PPARE	TGACCTTTGCCCCA	0.01	7	0.35	4551.7	0.0942	male-amplifier	LUAD
CTCF	AYAGTGCCMYCTRGTGGCCA	0.01	3	0.15	615.1	0.0127	male-amplifier	LUAD
PPARa	VNAGGKCAAAGGTCA	0.01	7	0.35	4896.8	0.1013	male-amplifier	LUAD
GRHL2	AAACYKGTTWDACMRGTTTB	0.01	3	0.15	1057.4	0.0219	male-amplifier	LUAD
Nanog	RGCCATTAAC	0.01	12	0.6	15592.3	0.3226	male-amplifier	LUAD
Fosl2	NATGASTCABNN	1e-08	14	0.1867	1199.9	0.0246	male-amplifier	KIRC
Jun-AP1	GATGASTCATCN	1e-08	12	0.16	868.7	0.0178	male-amplifier	KIRC
Fos	NDATGASTCAYN	1e-07	16	0.2133	1874.5	0.0384	male-amplifier	KIRC
Fra2	GGATGACTCATC	1e-07	15	0.2	1630.1	0.0334	male-amplifier	KIRC
Fra1	NNATGASTCATH	1e-07	15	0.2	1796.6	0.0368	male-amplifier	KIRC
JunB	RATGASTCAT	1e-06	15	0.2	1844.2	0.0378	male-amplifier	KIRC
BATF	DATGASTCAT	1e-06	15	0.2	2148.8	0.044	male-amplifier	KIRC
Atf3	DATGASTCATHN	1e-05	15	0.2	2196	0.045	male-amplifier	KIRC
MafA	TGCTGACTCA	1e-05	18	0.24	3441.8	0.0705	male-amplifier	KIRC
AP-1	VTGACTCATC	1e-05	15	0.2	2595.7	0.0532	male-amplifier	KIRC
Foxo1	CTGTTTAC	0.0001	27	0.36	8056.9	0.1651	male-amplifier	KIRC
MafF	HWWGTCAGCAWWTTT	0.0001	8	0.1067	841.9	0.0173	male-amplifier	KIRC
NF1	CYTGGCABNSTGCCAR	0.001	12	0.16	2540.9	0.0521	male-amplifier	KIRC
Pax8	GTCATGCHTGRCTGS	0.001	11	0.1467	2352.3	0.0482	male-amplifier	KIRC
ETS1	ACAGGAAGTG	0.01	17	0.2267	5036.6	0.1032	male-amplifier	KIRC
GRE	VAGRACAKWCTGTYC	0.01	6	0.08	857.4	0.0176	male-amplifier	KIRC
HIC1	TGCCAGCB	0.01	34	0.4533	14593.4	0.299	male-amplifier	KIRC
Bach2	TGCTGAGTCA	0.01	5	0.0667	713.4	0.0146	male-amplifier	KIRC
MYB	GGCVGTTR	0.01	20	0.2667	7292.8	0.1494	male-amplifier	KIRC
Rfx6	TGTTKCCTAGCAACM	0.0001	11	0.3929	5262.6	0.1095	male-amplifier	BLCA
Zic2	CHCAGCRGGRGG	0.001	8	0.2857	3211.7	0.0668	male-amplifier	BLCA
Sox7	VVRRAACAATGG	0.01	4	0.1429	887.3	0.0185	male-amplifier	BLCA
Elk4	NRYTTCCGGY	0.01	7	0.25	3475.2	0.0723	male-amplifier	BLCA
Zic	CCTGCTGAGH	0.01	8	0.2857	4502.2	0.0937	male-amplifier	BLCA
E2F1	CWGGCGGGAA	0.01	5	0.1786	1899.2	0.0395	male-amplifier	BLCA
Fli1	NRYTTCCGGH	0.01	9	0.3214	6084.4	0.1266	male-amplifier	BLCA
Sox21	BCCWTTGTBYKV	0.01	9	0.3214	6153.4	0.1281	male-amplifier	BLCA
Sox15	RAACAATGGN	0.01	7	0.25	3977	0.0828	male-amplifier	BLCA
FOXK1	NVWTGTTTAC	0.01	6	0.2143	3182.7	0.0662	male-amplifier	BLCA
NF1	CYTGGCABNSTGCCAR	1e-05	28	0.1065	1989.1	0.0413	male-amplifier	HNSC
NFAT	ATTTTCCATT	0.0001	31	0.1179	2672.5	0.0555	male-amplifier	HNSC
NF1-halfsite	YTGCCAAG	0.001	68	0.2586	8370.1	0.1739	male-amplifier	HNSC
Tgif2	TGTCANYT	0.001	89	0.3384	11923.7	0.2477	male-amplifier	HNSC
Tgif1	YTGWCADY	0.01	77	0.2928	10446.7	0.217	male-amplifier	HNSC
PBX1	GSCTGTCACTCA	0.01	6	0.0228	249.7	0.0052	male-amplifier	HNSC
EBF1	GTCCCCWGGGGA	0.01	50	0.1901	6424	0.1334	male-amplifier	HNSC
Brachyury	ANTTMRCASBNNNGTGYKAAN	0.01	10	0.038	721.7	0.015	male-amplifier	HNSC
Tlx?	CTGGCAGSCTGCCA	0.01	19	0.0722	1879.2	0.039	male-amplifier	HNSC
AR-halfsite	CCAGGAACAG	0.01	108	0.4106	16253.6	0.3376	male-amplifier	HNSC
Zfp57	NANTGCSGCA	0.01	27	0.1027	3020.6	0.0627	male-amplifier	HNSC
MafA	TGCTGACTCA	0.0001	25	0.1534	3255.8	0.0662	male-amplifier	KIRP
MafF	HWWGTCAGCAWWTTT	0.001	12	0.0736	965.5	0.0196	male-amplifier	KIRP
PAX5	GTCACGCTCSCTGM	0.001	8	0.0491	487	0.0099	male-amplifier	KIRP
Fos	NDATGASTCAYN	0.001	16	0.0982	1765.6	0.0359	male-amplifier	KIRP
Fra1	NNATGASTCATH	0.001	15	0.092	1596.8	0.0325	male-amplifier	KIRP
Fra2	GGATGACTCATC	0.001	14	0.0859	1428.4	0.029	male-amplifier	KIRP
Jun-AP1	GATGASTCATCN	0.001	9	0.0552	703.8	0.0143	male-amplifier	KIRP
JunB	RATGASTCAT	0.01	14	0.0859	1633.7	0.0332	male-amplifier	KIRP
Fosl2	NATGASTCABNN	0.01	10	0.0613	964.2	0.0196	male-amplifier	KIRP
BATF	DATGASTCAT	0.01	15	0.092	1945.7	0.0395	male-amplifier	KIRP
Atf3	DATGASTCATHN	0.01	15	0.092	2011.4	0.0409	male-amplifier	KIRP
Hoxa9	RGCAATNAAA	0.01	49	0.3006	10412.6	0.2116	male-amplifier	KIRP
AP-1	VTGACTCATC	0.01	16	0.0982	2368.5	0.0481	male-amplifier	KIRP
TCFL2	ACWTCAAAGG	0.01	4	0.0245	214.5	0.0044	male-amplifier	KIRP
NRF	STGCGCATGCGC	0.01	8	0.0491	834.8	0.017	male-amplifier	KIRP
NF1-halfsite	YTGCCAAG	0.01	46	0.2822	9825	0.1997	male-amplifier	KIRP
HIC1	TGCCAGCB	0.01	61	0.3742	13993.9	0.2844	male-amplifier	KIRP
Hoxb4	TGATTRATGGCY	0.01	6	0.0368	521.1	0.0106	male-amplifier	KIRP
NeuroD1	GCCATCTGTT	0.01	24	0.1472	4350.2	0.0884	male-amplifier	KIRP
ARE	RGRACASNSTGTYCYB	0.001	6	0.0968	821.9	0.0169	male-amplifier	COAD
EBF	DGTCCCYRGGGA	0.01	7	0.1129	1378.4	0.0283	male-amplifier	COAD
GRE	VAGRACAKWCTGTYC	0.01	5	0.0806	700.2	0.0144	male-amplifier	COAD
Hoxc9	GGCCATAAATCA	0.01	7	0.1129	1402.6	0.0288	male-amplifier	COAD
Myf5	BAACAGCTGT	0.01	11	0.1774	3353.1	0.0689	male-amplifier	COAD
MyoD	RRCAGCTGYTSY	0.01	13	0.2097	4397.1	0.0904	male-amplifier	COAD
MyoG	AACAGCTG	0.01	15	0.2419	5637.2	0.1159	male-amplifier	COAD
LRF	AAGACCCYYN	0.01	26	0.4194	12563.8	0.2583	male-amplifier	COAD
PRDM9	ADGGYAGYAGCATCT	0.01	8	0.129	2044.4	0.042	male-amplifier	COAD
Fra2	GGATGACTCATC	0.01	6	0.0968	1229.9	0.0253	male-amplifier	COAD
Fosl2	NATGASTCABNN	0.01	5	0.0806	863	0.0177	male-amplifier	COAD
NF1	CYTGGCABNSTGCCAR	0.01	8	0.129	2205.3	0.0453	male-amplifier	COAD
PBX2	RTGATTKATRGN	0.01	8	0.129	2216.3	0.0456	male-amplifier	COAD
Smad2	CTGTCTGG	0.01	18	0.2903	7796.5	0.1603	male-amplifier	COAD
Jun-AP1	GATGASTCATCN	0.01	4	0.0645	611.3	0.0126	male-amplifier	COAD
Fra1	NNATGASTCATH	0.01	6	0.0968	1423.9	0.0293	male-amplifier	COAD
NFkB-p65-Rel	GGAAATTCCC	0.01	1	1	324.9	0.0035	female-amplifier	KIRP
p53	RRCATGYCYRGRCATGYYYN	0.01	1	1	468.6	0.005	female-amplifier	KIRP
p53	RRCATGYCYRGRCATGYYYN	0.01	1	1	468.6	0.005	female-amplifier	KIRP
Egr1	TGCGTGGGYG	0.01	4	0.5714	12385.8	0.1228	female-amplifier	COAD
