# Supplementary material for: Attenuated sex-related DNA methylation differences in cancer highlight the magnitude bias mediating existing disparities
Source: Biol Sex Differ. 2024 Dec 23;15:106. doi: 10.1186/s13293-024-00682-4 (PMC11664931; doi:10.1186/s13293-024-00682-4)
Supplement: Supplementary file 14 — Supplementary material 14. [file 13293_2024_682_MOESM14_ESM.xlsx]

## Sheet: LIHC
ID	ONTOLOGY	TERM	N	DE	P.DE	Cancer
GO:0035655	BP	interleukin-18-mediated signaling pathway	9	3	4.63953e-05	LIHC
GO:0071351	BP	cellular response to interleukin-18	9	3	4.63953e-05	LIHC
GO:0070673	BP	response to interleukin-18	11	3	7.07981e-05	LIHC
GO:0035331	BP	negative regulation of hippo signaling	13	4	7.63385e-05	LIHC
GO:0010564	BP	regulation of cell cycle process	718	18	9.65169e-05	LIHC
GO:0022402	BP	cell cycle process	1226	25	0.000178862	LIHC
GO:0002076	BP	osteoblast development	18	4	0.000182225	LIHC
GO:0090068	BP	positive regulation of cell cycle process	252	10	0.000187051	LIHC
GO:1901970	BP	positive regulation of mitotic sister chromatid separation	18	3	0.000321158	LIHC
GO:0051783	BP	regulation of nuclear division	143	7	0.000349273	LIHC
GO:0033829	MF	O-fucosylpeptide 3-beta-N-acetylglucosaminyltransferase activity	3	2	0.000384626	LIHC
GO:1990597	CC	AIP1-IRE1 complex	2	2	0.000384878	LIHC
GO:0051348	BP	negative regulation of transferase activity	265	10	0.00045358	LIHC
GO:0051726	BP	regulation of cell cycle	1102	22	0.000496263	LIHC
GO:0140014	BP	mitotic nuclear division	321	10	0.000523386	LIHC
GO:0035330	BP	regulation of hippo signaling	24	4	0.000558438	LIHC
GO:0045787	BP	positive regulation of cell cycle	336	11	0.000615372	LIHC
GO:0007088	BP	regulation of mitotic nuclear division	117	6	0.000661279	LIHC
GO:0048015	BP	phosphatidylinositol-mediated signaling	170	8	0.000672667	LIHC
GO:0045840	BP	positive regulation of mitotic nuclear division	43	4	0.000746203	LIHC
GO:0006739	BP	NADP metabolic process	42	4	0.000751632	LIHC
GO:0007049	BP	cell cycle	1764	30	0.000773214	LIHC
GO:0048017	BP	inositol lipid-mediated signaling	174	8	0.000773655	LIHC
GO:0033673	BP	negative regulation of kinase activity	231	9	0.000887213	LIHC
GO:0033002	BP	muscle cell proliferation	239	9	0.00106011	LIHC
GO:1905820	BP	positive regulation of chromosome separation	27	3	0.00106539	LIHC
GO:0014065	BP	phosphatidylinositol 3-kinase signaling	140	7	0.00114812	LIHC
GO:1903047	BP	mitotic cell cycle process	780	17	0.00120997	LIHC
GO:0043124	BP	negative regulation of I-kappaB kinase/NF-kappaB signaling	48	4	0.00121327	LIHC
GO:0030071	BP	regulation of mitotic metaphase/anaphase transition	92	5	0.00132806	LIHC
GO:1901990	BP	regulation of mitotic cell cycle phase transition	349	10	0.00142134	LIHC
GO:0071889	MF	14-3-3 protein binding	31	4	0.00145042	LIHC
GO:0007091	BP	metaphase/anaphase transition of mitotic cell cycle	95	5	0.00153247	LIHC
GO:0000070	BP	mitotic sister chromatid segregation	202	7	0.00158139	LIHC
GO:0010965	BP	regulation of mitotic sister chromatid separation	97	5	0.00160623	LIHC
GO:1902099	BP	regulation of metaphase/anaphase transition of cell cycle	95	5	0.00163404	LIHC
GO:0051338	BP	regulation of transferase activity	870	19	0.00175414	LIHC
GO:0051306	BP	mitotic sister chromatid separation	100	5	0.00183889	LIHC
GO:0006469	BP	negative regulation of protein kinase activity	211	8	0.00185791	LIHC
GO:0044784	BP	metaphase/anaphase transition of cell cycle	98	5	0.00187151	LIHC
GO:0010948	BP	negative regulation of cell cycle process	312	9	0.00194483	LIHC
GO:0045747	BP	positive regulation of Notch signaling pathway	45	4	0.00196692	LIHC
GO:0032466	BP	negative regulation of cytokinesis	7	2	0.00202945	LIHC
GO:1902532	BP	negative regulation of intracellular signal transduction	529	13	0.00210799	LIHC
GO:0051785	BP	positive regulation of nuclear division	57	4	0.00231441	LIHC
GO:0000280	BP	nuclear division	471	11	0.00237286	LIHC
GO:0046890	BP	regulation of lipid biosynthetic process	180	7	0.00239006	LIHC
GO:1901987	BP	regulation of cell cycle phase transition	446	11	0.00245585	LIHC
GO:0033045	BP	regulation of sister chromatid segregation	106	5	0.00256455	LIHC
GO:0017151	MF	DEAD/H-box RNA helicase binding	8	2	0.00269097	LIHC
GO:1905818	BP	regulation of chromosome separation	110	5	0.00273314	LIHC
GO:0031638	BP	zymogen activation	66	4	0.00284556	LIHC
GO:0010605	BP	negative regulation of macromolecule metabolic process	3069	42	0.00295322	LIHC
GO:0000819	BP	sister chromatid segregation	231	7	0.00298263	LIHC
GO:0000278	BP	mitotic cell cycle	933	18	0.00299982	LIHC
GO:0019216	BP	regulation of lipid metabolic process	339	10	0.00303736	LIHC
GO:0048661	BP	positive regulation of smooth muscle cell proliferation	97	5	0.00312148	LIHC
GO:0048539	BP	bone marrow development	9	2	0.00323519	LIHC
GO:0045786	BP	negative regulation of cell cycle	395	10	0.00326539	LIHC
GO:0007346	BP	regulation of mitotic cell cycle	510	12	0.00331405	LIHC
GO:0031931	CC	TORC1 complex	6	2	0.00335415	LIHC
GO:0035329	BP	hippo signaling	43	4	0.00350526	LIHC
GO:1901992	BP	positive regulation of mitotic cell cycle phase transition	99	5	0.00373161	LIHC
GO:0009892	BP	negative regulation of metabolic process	3280	44	0.00378307	LIHC
GO:0098813	BP	nuclear chromosome segregation	309	8	0.00394487	LIHC
GO:0007249	BP	I-kappaB kinase/NF-kappaB signaling	282	8	0.00398195	LIHC
GO:0043086	BP	negative regulation of catalytic activity	759	15	0.00405831	LIHC
GO:0019362	BP	pyridine nucleotide metabolic process	72	4	0.00413053	LIHC
GO:0046496	BP	nicotinamide nucleotide metabolic process	72	4	0.00413053	LIHC
GO:0061304	BP	retinal blood vessel morphogenesis	6	2	0.00476218	LIHC
GO:0008593	BP	regulation of Notch signaling pathway	94	5	0.00496097	LIHC
GO:0051983	BP	regulation of chromosome segregation	130	5	0.00496892	LIHC
GO:0048285	BP	organelle fission	517	11	0.00504274	LIHC
GO:0042593	BP	glucose homeostasis	238	8	0.00532187	LIHC
GO:0033500	BP	carbohydrate homeostasis	239	8	0.00538598	LIHC
GO:0030073	BP	insulin secretion	183	7	0.0054485	LIHC
GO:1905115	BP	regulation of lateral attachment of mitotic spindle microtubules to kinetochore	1	1	0.00555664	LIHC
GO:1905116	BP	positive regulation of lateral attachment of mitotic spindle microtubules to kinetochore	1	1	0.00555664	LIHC
GO:0045842	BP	positive regulation of mitotic metaphase/anaphase transition	14	2	0.00559094	LIHC
GO:0031324	BP	negative regulation of cellular metabolic process	2238	35	0.00571959	LIHC
GO:0051304	BP	chromosome separation	133	5	0.00586001	LIHC
GO:0072524	BP	pyridine-containing compound metabolic process	78	4	0.00586569	LIHC
GO:0045598	BP	regulation of fat cell differentiation	144	6	0.00591166	LIHC
GO:0036454	CC	growth factor complex	7	2	0.00601672	LIHC
GO:1902296	BP	DNA strand elongation involved in cell cycle DNA replication	1	1	0.00603267	LIHC
GO:1902319	BP	DNA strand elongation involved in nuclear cell cycle DNA replication	1	1	0.00603267	LIHC
GO:1902983	BP	DNA strand elongation involved in mitotic DNA replication	1	1	0.00603267	LIHC
GO:0001702	BP	gastrulation with mouth forming second	28	3	0.00610449	LIHC
GO:0061929	MF	gamma-glutamylaminecyclotransferase activity	1	1	0.00615758	LIHC
GO:0008817	MF	cob(I)yrinic acid a,c-diamide adenosyltransferase activity	1	1	0.00616499	LIHC
GO:0043393	BP	regulation of protein binding	198	7	0.00621263	LIHC
GO:1904057	BP	negative regulation of sensory perception of pain	2	1	0.00624972	LIHC
GO:1900103	BP	positive regulation of endoplasmic reticulum unfolded protein response	13	2	0.00626986	LIHC
GO:0045936	BP	negative regulation of phosphate metabolic process	425	11	0.00628087	LIHC
GO:0010563	BP	negative regulation of phosphorus metabolic process	426	11	0.00635192	LIHC
GO:0071900	BP	regulation of protein serine/threonine kinase activity	370	10	0.00636159	LIHC
GO:1902101	BP	positive regulation of metaphase/anaphase transition of cell cycle	15	2	0.00639038	LIHC
GO:0008957	MF	phenylacetaldehyde dehydrogenase activity	1	1	0.00649504	LIHC
GO:0016663	MF	oxidoreductase activity, acting on other nitrogenous compounds as donors, oxygen as acceptor	1	1	0.00649504	LIHC
GO:0018547	MF	nitroglycerin reductase activity	1	1	0.00649504	LIHC
GO:1905627	BP	regulation of serotonin biosynthetic process	1	1	0.00649504	LIHC
GO:0043531	MF	ADP binding	34	3	0.00666753	LIHC
GO:0033301	BP	cell cycle comprising mitosis without cytokinesis	1	1	0.00673613	LIHC
GO:0009790	BP	embryo development	1116	23	0.00674883	LIHC
GO:0071902	BP	positive regulation of protein serine/threonine kinase activity	209	7	0.00690133	LIHC
GO:0042326	BP	negative regulation of phosphorylation	368	10	0.00703023	LIHC
GO:0014066	BP	regulation of phosphatidylinositol 3-kinase signaling	106	5	0.00706277	LIHC
GO:0072595	BP	maintenance of protein localization in organelle	41	3	0.0071038	LIHC
GO:1905899	BP	regulation of smooth muscle tissue development	1	1	0.00731856	LIHC
GO:0043122	BP	regulation of I-kappaB kinase/NF-kappaB signaling	250	7	0.00744843	LIHC
GO:0043549	BP	regulation of kinase activity	749	16	0.00745674	LIHC
GO:0036498	BP	IRE1-mediated unfolded protein response	20	2	0.00746342	LIHC
GO:0098845	CC	postsynaptic endosome	14	2	0.00753882	LIHC
GO:0045859	BP	regulation of protein kinase activity	641	14	0.00757646	LIHC
GO:0007080	BP	mitotic metaphase plate congression	56	3	0.00773753	LIHC
GO:0033688	BP	regulation of osteoblast proliferation	31	3	0.00780995	LIHC
GO:0140739	BP	NLRP6 inflammasome complex assembly	1	1	0.00782021	LIHC
GO:0044770	BP	cell cycle phase transition	568	12	0.0078339	LIHC
GO:0010565	BP	regulation of cellular ketone metabolic process	133	5	0.00802248	LIHC
GO:1901989	BP	positive regulation of cell cycle phase transition	120	5	0.00802695	LIHC
GO:0048659	BP	smooth muscle cell proliferation	174	6	0.00808647	LIHC
GO:0034501	BP	protein localization to kinetochore	18	2	0.00834688	LIHC
GO:1903083	BP	protein localization to condensed chromosome	18	2	0.00834688	LIHC
GO:0010638	BP	positive regulation of organelle organization	501	11	0.0084687	LIHC
GO:0023051	BP	regulation of signaling	3348	49	0.00858069	LIHC
GO:0001678	BP	cellular glucose homeostasis	151	6	0.00862379	LIHC
GO:0051879	MF	Hsp90 protein binding	41	3	0.00864229	LIHC
GO:0048680	BP	positive regulation of axon regeneration	13	2	0.00864692	LIHC
GO:0042632	BP	cholesterol homeostasis	96	4	0.00879365	LIHC
GO:0055092	BP	sterol homeostasis	97	4	0.00893901	LIHC
GO:0001921	BP	positive regulation of receptor recycling	12	2	0.00895167	LIHC
GO:0050796	BP	regulation of insulin secretion	149	6	0.00900632	LIHC
GO:0042730	BP	fibrinolysis	25	2	0.0091834	LIHC
GO:1901303	BP	negative regulation of cargo loading into COPII-coated vesicle	1	1	0.00918425	LIHC
GO:0070572	BP	positive regulation of neuron projection regeneration	14	2	0.00928339	LIHC
GO:0019217	BP	regulation of fatty acid metabolic process	94	4	0.00938799	LIHC
GO:0001933	BP	negative regulation of protein phosphorylation	329	9	0.00944835	LIHC
GO:0045913	BP	positive regulation of carbohydrate metabolic process	78	4	0.00961804	LIHC
GO:0071901	BP	negative regulation of protein serine/threonine kinase activity	118	5	0.00964249	LIHC
GO:0051172	BP	negative regulation of nitrogen compound metabolic process	2373	35	0.00967606	LIHC
GO:0001701	BP	in utero embryonic development	388	10	0.00967988	LIHC
GO:0061299	BP	retina vasculature morphogenesis in camera-type eye	11	2	0.00983685	LIHC
GO:0038201	CC	TOR complex	11	2	0.0101888	LIHC
GO:0033687	BP	osteoblast proliferation	36	3	0.0104226	LIHC
GO:0097442	CC	CA3 pyramidal cell dendrite	2	1	0.0104414	LIHC
GO:0051782	BP	negative regulation of cell division	17	2	0.0108484	LIHC
GO:0033690	BP	positive regulation of osteoblast proliferation	13	2	0.0109748	LIHC
GO:0007059	BP	chromosome segregation	369	8	0.0111165	LIHC
GO:0010976	BP	positive regulation of neuron projection development	155	6	0.011326	LIHC
GO:0048009	BP	insulin-like growth factor receptor signaling pathway	37	3	0.011531	LIHC
GO:0070946	BP	neutrophil-mediated killing of gram-positive bacterium	2	1	0.0115416	LIHC
GO:1901976	BP	regulation of cell cycle checkpoint	48	3	0.0117597	LIHC
GO:0002416	BP	IgG immunoglobulin transcytosis in epithelial cells mediated by FcRn immunoglobulin receptor	1	1	0.0117938	LIHC
GO:0099607	BP	lateral attachment of mitotic spindle microtubules to kinetochore	2	1	0.0119459	LIHC
GO:0009968	BP	negative regulation of signal transduction	1270	22	0.012098	LIHC
GO:0030195	BP	negative regulation of blood coagulation	48	3	0.0121373	LIHC
GO:0036290	BP	protein trans-autophosphorylation	1	1	0.0123086	LIHC
GO:0070054	BP	mRNA splicing, via endonucleolytic cleavage and ligation	1	1	0.0123086	LIHC
GO:1990332	CC	Ire1 complex	1	1	0.0123086	LIHC
GO:1990579	BP	peptidyl-serine trans-autophosphorylation	1	1	0.0123086	LIHC
GO:1902065	BP	response to L-glutamate	12	2	0.012539	LIHC
GO:0007183	BP	SMAD protein complex assembly	13	2	0.0125977	LIHC
GO:0071142	CC	homomeric SMAD protein complex	2	1	0.0127131	LIHC
GO:1902850	BP	microtubule cytoskeleton organization involved in mitosis	162	5	0.0127386	LIHC
GO:0030072	BP	peptide hormone secretion	225	7	0.0129569	LIHC
GO:0001886	BP	endothelial cell morphogenesis	12	2	0.0131574	LIHC
GO:0048268	BP	clathrin coat assembly	16	2	0.0132395	LIHC
GO:0005521	MF	lamin binding	16	2	0.0134102	LIHC
GO:0046889	BP	positive regulation of lipid biosynthetic process	88	4	0.0134605	LIHC
GO:0050819	BP	negative regulation of coagulation	52	3	0.0134912	LIHC
GO:1902531	BP	regulation of intracellular signal transduction	1711	27	0.0135161	LIHC
GO:1900047	BP	negative regulation of hemostasis	49	3	0.0135897	LIHC
GO:0006006	BP	glucose metabolic process	186	6	0.0138211	LIHC
GO:0071676	BP	negative regulation of mononuclear cell migration	22	2	0.0138273	LIHC
GO:0045931	BP	positive regulation of mitotic cell cycle	128	5	0.0138508	LIHC
GO:0010507	BP	negative regulation of autophagy	84	4	0.0138612	LIHC
GO:0005161	MF	platelet-derived growth factor receptor binding	14	2	0.0141035	LIHC
GO:2000494	BP	positive regulation of interleukin-18-mediated signaling pathway	3	1	0.0141441	LIHC
GO:0044092	BP	negative regulation of molecular function	1122	18	0.0141723	LIHC
GO:0000932	CC	P-body	95	4	0.0142088	LIHC
GO:1905597	BP	positive regulation of low-density lipoprotein particle receptor binding	1	1	0.0142221	LIHC
GO:1902806	BP	regulation of cell cycle G1/S phase transition	208	6	0.0142806	LIHC
GO:0036316	BP	SREBP-SCAP complex retention in endoplasmic reticulum	2	1	0.0142861	LIHC
GO:0044772	BP	mitotic cell cycle phase transition	467	10	0.0142912	LIHC
GO:0002790	BP	peptide secretion	230	7	0.0144001	LIHC
GO:0120043	CC	stereocilium shaft	2	1	0.0146166	LIHC
GO:0032091	BP	negative regulation of protein binding	94	4	0.0146387	LIHC
GO:0090231	BP	regulation of spindle checkpoint	21	2	0.0146402	LIHC
GO:0090266	BP	regulation of mitotic cell cycle spindle assembly checkpoint	21	2	0.0146402	LIHC
GO:1903504	BP	regulation of mitotic spindle checkpoint	21	2	0.0146402	LIHC
GO:0048514	BP	blood vessel morphogenesis	682	14	0.0146779	LIHC
GO:0071333	BP	cellular response to glucose stimulus	129	5	0.0146833	LIHC
GO:0006109	BP	regulation of carbohydrate metabolic process	181	6	0.0147096	LIHC
GO:0051130	BP	positive regulation of cellular component organization	1033	19	0.0149728	LIHC
GO:0051347	BP	positive regulation of transferase activity	560	12	0.0150104	LIHC
GO:1901301	BP	regulation of cargo loading into COPII-coated vesicle	2	1	0.0152542	LIHC
GO:1905240	BP	negative regulation of canonical Wnt signaling pathway involved in osteoblast differentiation	2	1	0.0152689	LIHC
GO:0071364	BP	cellular response to epidermal growth factor stimulus	43	3	0.0154574	LIHC
GO:0009880	BP	embryonic pattern specification	74	4	0.0154881	LIHC
GO:1990026	CC	hippocampal mossy fiber expansion	2	1	0.0155863	LIHC
GO:0071331	BP	cellular response to hexose stimulus	131	5	0.0156515	LIHC
GO:0010648	BP	negative regulation of cell communication	1374	23	0.015712	LIHC
GO:0014067	BP	negative regulation of phosphatidylinositol 3-kinase signaling	16	2	0.0157847	LIHC
GO:0071326	BP	cellular response to monosaccharide stimulus	133	5	0.0161223	LIHC
GO:0046777	BP	protein autophosphorylation	225	7	0.0161459	LIHC
GO:0090307	BP	mitotic spindle assembly	73	3	0.0162514	LIHC
GO:0023057	BP	negative regulation of signaling	1380	23	0.0163388	LIHC
GO:1903179	BP	regulation of dopamine biosynthetic process	3	1	0.0164388	LIHC
GO:0006098	BP	pentose-phosphate shunt	18	2	0.0165683	LIHC
GO:0003960	MF	NADPH:quinone reductase activity	4	1	0.0166192	LIHC
GO:0016310	BP	phosphorylation	1777	28	0.0166787	LIHC
GO:0098842	CC	postsynaptic early endosome	3	1	0.0167373	LIHC
GO:0140738	CC	NLRP6 inflammasome complex	2	1	0.0168543	LIHC
GO:1901978	BP	positive regulation of cell cycle checkpoint	19	2	0.0168667	LIHC
GO:0061444	BP	endocardial cushion cell development	1	1	0.016874	LIHC
GO:0090276	BP	regulation of peptide hormone secretion	179	6	0.017316	LIHC
GO:0003071	BP	renal system process involved in regulation of systemic arterial blood pressure	23	2	0.0173894	LIHC
GO:0051784	BP	negative regulation of nuclear division	63	3	0.0174744	LIHC
GO:0070849	BP	response to epidermal growth factor	47	3	0.0177453	LIHC
GO:0010755	BP	regulation of plasminogen activation	17	2	0.0178315	LIHC
GO:0001568	BP	blood vessel development	762	15	0.0179387	LIHC
GO:1990630	CC	IRE1-RACK1-PP2A complex	2	1	0.0179581	LIHC
GO:0002791	BP	regulation of peptide secretion	182	6	0.0181427	LIHC
GO:0033044	BP	regulation of chromosome organization	248	6	0.0182185	LIHC
GO:0051054	BP	positive regulation of DNA metabolic process	296	7	0.018305	LIHC
GO:0000917	BP	division septum assembly	1	1	0.0184459	LIHC
GO:0051666	BP	actin cortical patch localization	1	1	0.0184459	LIHC
GO:0090529	BP	cell septum assembly	1	1	0.0184459	LIHC
GO:0090087	BP	regulation of peptide transport	184	6	0.018592	LIHC
GO:1900087	BP	positive regulation of G1/S transition of mitotic cell cycle	54	3	0.0186556	LIHC
GO:0098814	BP	spontaneous synaptic transmission	14	2	0.0186898	LIHC
GO:0048260	BP	positive regulation of receptor-mediated endocytosis	52	3	0.0187167	LIHC
GO:0051445	BP	regulation of meiotic cell cycle	63	3	0.0189242	LIHC
GO:0045833	BP	negative regulation of lipid metabolic process	105	4	0.018996	LIHC
GO:0007252	BP	I-kappaB phosphorylation	20	2	0.0192092	LIHC
GO:0004060	MF	arylamine N-acetyltransferase activity	3	1	0.0193155	LIHC
GO:0050708	BP	regulation of protein secretion	256	7	0.0194376	LIHC
GO:0010646	BP	regulation of cell communication	3335	47	0.0196393	LIHC
GO:0036464	CC	cytoplasmic ribonucleoprotein granule	240	6	0.0198427	LIHC
GO:0051225	BP	spindle assembly	127	4	0.0200103	LIHC
GO:0034399	CC	nuclear periphery	145	5	0.0200624	LIHC
GO:2000492	BP	regulation of interleukin-18-mediated signaling pathway	4	1	0.0201463	LIHC
GO:0032877	BP	positive regulation of DNA endoreduplication	2	1	0.0205326	LIHC
GO:0045667	BP	regulation of osteoblast differentiation	139	5	0.0205439	LIHC
GO:0006796	BP	phosphate-containing compound metabolic process	2691	37	0.0205912	LIHC
GO:0032937	CC	SREBP-SCAP-Insig complex	3	1	0.0205918	LIHC
GO:0051276	BP	chromosome organization	590	10	0.0208938	LIHC
GO:0098641	MF	cadherin binding involved in cell-cell adhesion	18	2	0.02101	LIHC
GO:1905239	BP	regulation of canonical Wnt signaling pathway involved in osteoblast differentiation	4	1	0.021015	LIHC
GO:0051310	BP	metaphase plate congression	70	3	0.0211661	LIHC
GO:0099627	BP	neurotransmitter receptor cycle	1	1	0.0212429	LIHC
GO:0099630	BP	postsynaptic neurotransmitter receptor cycle	1	1	0.0212429	LIHC
GO:0072255	BP	metanephric glomerular mesangial cell development	1	1	0.0213322	LIHC
GO:0001223	MF	transcription coactivator binding	40	3	0.0213874	LIHC
GO:2000639	BP	negative regulation of SREBP signaling pathway	3	1	0.0214088	LIHC
GO:0060348	BP	bone development	227	7	0.0216064	LIHC
GO:0002034	BP	maintenance of blood vessel diameter homeostasis by renin-angiotensin	4	1	0.0216363	LIHC
GO:0003072	BP	renal control of peripheral vascular resistance involved in regulation of systemic arterial blood pressure	4	1	0.0216363	LIHC
GO:0002414	BP	immunoglobulin transcytosis in epithelial cells	3	1	0.02175	LIHC
GO:0007052	BP	mitotic spindle organization	132	4	0.0222802	LIHC
GO:0090030	BP	regulation of steroid hormone biosynthetic process	16	2	0.0223561	LIHC
GO:0042802	MF	identical protein binding	1944	27	0.0223647	LIHC
GO:0048585	BP	negative regulation of response to stimulus	1640	25	0.0223736	LIHC
GO:0071322	BP	cellular response to carbohydrate stimulus	145	5	0.0226264	LIHC
GO:0061298	BP	retina vasculature development in camera-type eye	19	2	0.0227479	LIHC
GO:0001221	MF	transcription coregulator binding	108	5	0.0227745	LIHC
GO:0006740	BP	NADPH regeneration	21	2	0.0228132	LIHC
GO:1903672	BP	positive regulation of sprouting angiogenesis	27	2	0.0228712	LIHC
GO:0045925	BP	positive regulation of female receptivity	2	1	0.022879	LIHC
GO:0015833	BP	peptide transport	254	7	0.0232457	LIHC
GO:0032869	BP	cellular response to insulin stimulus	202	6	0.0232718	LIHC
GO:0004344	MF	glucose dehydrogenase activity	1	1	0.0233333	LIHC
GO:0047934	MF	glucose 1-dehydrogenase (NAD+) activity	1	1	0.0233333	LIHC
GO:0047935	MF	glucose 1-dehydrogenase (NADP+) activity	1	1	0.0233333	LIHC
GO:0047936	MF	glucose 1-dehydrogenase [NAD(P)] activity	1	1	0.0233333	LIHC
GO:0006793	BP	phosphorus metabolic process	2717	37	0.0233804	LIHC
GO:0001649	BP	osteoblast differentiation	244	7	0.0236282	LIHC
GO:0032507	BP	maintenance of protein location in cell	63	3	0.0237688	LIHC
GO:0017055	BP	negative regulation of RNA polymerase II transcription preinitiation complex assembly	2	1	0.0237894	LIHC
GO:0001503	BP	ossification	421	10	0.0238707	LIHC
GO:0001944	BP	vasculature development	796	15	0.023906	LIHC
GO:0004867	MF	serine-type endopeptidase inhibitor activity	92	3	0.0239803	LIHC
GO:0046324	BP	regulation of glucose import	58	3	0.0239922	LIHC
GO:0000811	CC	GINS complex	4	1	0.0242035	LIHC
GO:0061443	BP	endocardial cushion cell differentiation	2	1	0.0242412	LIHC
GO:0000026	MF	alpha-1,2-mannosyltransferase activity	4	1	0.0244007	LIHC
GO:0100002	BP	negative regulation of protein kinase activity by protein phosphorylation	1	1	0.0244261	LIHC
GO:0000773	MF	phosphatidyl-N-methylethanolamine N-methyltransferase activity	1	1	0.0246464	LIHC
GO:0004608	MF	phosphatidylethanolamine N-methyltransferase activity	1	1	0.0246464	LIHC
GO:0080101	MF	phosphatidyl-N-dimethylethanolamine N-methyltransferase activity	1	1	0.0246464	LIHC
GO:0045860	BP	positive regulation of protein kinase activity	395	9	0.0247294	LIHC
GO:0006090	BP	pyruvate metabolic process	107	4	0.0248698	LIHC
GO:0005643	CC	nuclear pore	94	3	0.025396	LIHC
GO:0045056	BP	transcytosis	21	2	0.0254546	LIHC
GO:0051990	MF	(R)-2-hydroxyglutarate dehydrogenase activity	1	1	0.0254554	LIHC
GO:0045016	BP	mitochondrial magnesium ion transmembrane transport	2	1	0.0255462	LIHC
GO:0045668	BP	negative regulation of osteoblast differentiation	54	3	0.0256657	LIHC
GO:0003017	BP	lymph circulation	2	1	0.0258382	LIHC
GO:0031639	BP	plasminogen activation	26	2	0.0258731	LIHC
GO:0035770	CC	ribonucleoprotein granule	257	6	0.0259405	LIHC
GO:0061768	MF	magnesium:sodium antiporter activity	2	1	0.0261776	LIHC
GO:0097061	BP	dendritic spine organization	79	4	0.0264235	LIHC
GO:0036250	BP	peroxisome transport along microtubule	1	1	0.0264257	LIHC
GO:0044721	BP	protein import into peroxisome matrix, substrate release	1	1	0.0264257	LIHC
GO:0007051	BP	spindle organization	194	5	0.026436	LIHC
GO:0008645	BP	hexose transmembrane transport	114	4	0.0266699	LIHC
GO:0014055	BP	acetylcholine secretion, neurotransmission	3	1	0.0267238	LIHC
GO:0014056	BP	regulation of acetylcholine secretion, neurotransmission	3	1	0.0267238	LIHC
GO:0001919	BP	regulation of receptor recycling	22	2	0.0267782	LIHC
GO:0009306	BP	protein secretion	351	8	0.0268307	LIHC
GO:1905059	MF	P-type calcium transporter activity involved in regulation of postsynaptic cytosolic calcium ion concentration	1	1	0.0269171	LIHC
GO:0035592	BP	establishment of protein localization to extracellular region	352	8	0.0269681	LIHC
GO:1990665	CC	AnxA2-p11 complex	2	1	0.0271357	LIHC
GO:0071505	BP	response to mycophenolic acid	2	1	0.0276811	LIHC
GO:0071506	BP	cellular response to mycophenolic acid	2	1	0.0276811	LIHC
GO:0015749	BP	monosaccharide transmembrane transport	117	4	0.0278507	LIHC
GO:0050790	BP	regulation of catalytic activity	2266	32	0.027857	LIHC
GO:0071348	BP	cellular response to interleukin-11	1	1	0.0280219	LIHC
GO:0004736	MF	pyruvate carboxylase activity	1	1	0.0280842	LIHC
GO:0014839	BP	myoblast migration involved in skeletal muscle regeneration	3	1	0.0281108	LIHC
GO:0003725	MF	double-stranded RNA binding	76	3	0.0281491	LIHC
GO:1990667	CC	PCSK9-AnxA2 complex	2	1	0.0281717	LIHC
GO:1905602	BP	positive regulation of receptor-mediated endocytosis involved in cholesterol transport	2	1	0.0281955	LIHC
GO:1905176	BP	positive regulation of vascular associated smooth muscle cell dedifferentiation	3	1	0.0282813	LIHC
GO:0097062	BP	dendritic spine maintenance	21	2	0.0284016	LIHC
GO:0070291	BP	N-acylethanolamine metabolic process	5	1	0.0285564	LIHC
GO:1902488	BP	cholangiocyte apoptotic process	1	1	0.0287331	LIHC
GO:1904192	BP	regulation of cholangiocyte apoptotic process	1	1	0.0287331	LIHC
GO:1904193	BP	negative regulation of cholangiocyte apoptotic process	1	1	0.0287331	LIHC
GO:0000910	BP	cytokinesis	180	5	0.0287525	LIHC
GO:0043325	MF	phosphatidylinositol-3,4-bisphosphate binding	26	2	0.0287865	LIHC
GO:1902359	BP	Notch signaling pathway involved in somitogenesis	2	1	0.0288501	LIHC
GO:1902366	BP	regulation of Notch signaling pathway involved in somitogenesis	2	1	0.0288501	LIHC
GO:1902367	BP	negative regulation of Notch signaling pathway involved in somitogenesis	2	1	0.0288501	LIHC
GO:0061845	CC	neuron projection branch point	1	1	0.0288772	LIHC
GO:0061846	CC	dendritic spine cytoplasm	1	1	0.0288772	LIHC
GO:0099564	BP	modification of synaptic structure, modulating synaptic transmission	1	1	0.0288772	LIHC
GO:1902808	BP	positive regulation of cell cycle G1/S phase transition	66	3	0.029024	LIHC
GO:0009826	BP	unidimensional cell growth	3	1	0.029058	LIHC
GO:0032804	BP	negative regulation of low-density lipoprotein particle receptor catabolic process	2	1	0.0291699	LIHC
GO:0004345	MF	glucose-6-phosphate dehydrogenase activity	2	1	0.0292318	LIHC
GO:0031929	BP	TOR signaling	124	4	0.0292387	LIHC
GO:0023056	BP	positive regulation of signaling	1714	26	0.0292609	LIHC
GO:0030234	MF	enzyme regulator activity	1184	19	0.0293326	LIHC
GO:0048660	BP	regulation of smooth muscle cell proliferation	170	5	0.0293713	LIHC
GO:0032875	BP	regulation of DNA endoreduplication	3	1	0.0294061	LIHC
GO:0070613	BP	regulation of protein processing	64	3	0.0296017	LIHC
GO:0072209	BP	metanephric mesangial cell differentiation	2	1	0.0297273	LIHC
GO:0072254	BP	metanephric glomerular mesangial cell differentiation	2	1	0.0297273	LIHC
GO:2000045	BP	regulation of G1/S transition of mitotic cell cycle	182	5	0.0297757	LIHC
GO:2000676	BP	positive regulation of type B pancreatic cell apoptotic process	3	1	0.0298006	LIHC
GO:0045875	BP	negative regulation of sister chromatid cohesion	5	1	0.0299256	LIHC
GO:0035773	BP	insulin secretion involved in cellular response to glucose stimulus	59	3	0.0300507	LIHC
GO:0042059	BP	negative regulation of epidermal growth factor receptor signaling pathway	27	2	0.0301183	LIHC
GO:0019318	BP	hexose metabolic process	227	6	0.0302384	LIHC
GO:1903932	BP	regulation of DNA primase activity	5	1	0.0302408	LIHC
GO:1903934	BP	positive regulation of DNA primase activity	5	1	0.0302408	LIHC
GO:0034315	BP	regulation of Arp2/3 complex-mediated actin nucleation	28	2	0.0307015	LIHC
GO:1990418	BP	response to insulin-like growth factor stimulus	3	1	0.0307939	LIHC
GO:1990032	CC	parallel fiber	2	1	0.0308635	LIHC
GO:0045834	BP	positive regulation of lipid metabolic process	153	5	0.0308909	LIHC
GO:0071692	BP	protein localization to extracellular region	359	8	0.0309637	LIHC
GO:2000637	BP	positive regulation of miRNA-mediated gene silencing	24	2	0.0309737	LIHC
GO:0045922	BP	negative regulation of fatty acid metabolic process	38	2	0.0310431	LIHC
GO:0017057	MF	6-phosphogluconolactonase activity	2	1	0.0310742	LIHC
GO:0071459	BP	protein localization to chromosome, centromeric region	40	2	0.0311098	LIHC
GO:1990523	BP	bone regeneration	3	1	0.0312244	LIHC
GO:0009966	BP	regulation of signal transduction	2951	41	0.0312312	LIHC
GO:1905581	BP	positive regulation of low-density lipoprotein particle clearance	3	1	0.0312359	LIHC
GO:0044878	BP	mitotic cytokinesis checkpoint signaling	4	1	0.0313091	LIHC
GO:0006367	BP	transcription initiation at RNA polymerase II promoter	92	3	0.0313346	LIHC
GO:1905595	BP	regulation of low-density lipoprotein particle receptor binding	3	1	0.0314318	LIHC
GO:2000573	BP	positive regulation of DNA biosynthetic process	74	3	0.0314678	LIHC
GO:1900101	BP	regulation of endoplasmic reticulum unfolded protein response	29	2	0.0314819	LIHC
GO:0106027	BP	neuron projection organization	89	4	0.0314993	LIHC
GO:0003104	BP	positive regulation of glomerular filtration	2	1	0.0316201	LIHC
GO:0051303	BP	establishment of chromosome localization	81	3	0.0316485	LIHC
GO:0070891	MF	lipoteichoic acid binding	5	1	0.0317201	LIHC
GO:0140683	MF	histone H3-di/monomethyl-lysine-9 demethylase activity	5	1	0.0319302	LIHC
GO:0060148	BP	positive regulation of post-transcriptional gene silencing	25	2	0.0319458	LIHC
GO:1900370	BP	positive regulation of post-transcriptional gene silencing by RNA	25	2	0.0319458	LIHC
GO:1905599	BP	positive regulation of low-density lipoprotein receptor activity	5	1	0.0321139	LIHC
GO:0034383	BP	low-density lipoprotein particle clearance	33	2	0.0321411	LIHC
GO:0042078	BP	germ-line stem cell division	2	1	0.0322241	LIHC
GO:0048133	BP	male germ-line stem cell asymmetric division	2	1	0.0322241	LIHC
GO:0098722	BP	asymmetric stem cell division	2	1	0.0322241	LIHC
GO:0098728	BP	germline stem cell asymmetric division	2	1	0.0322241	LIHC
GO:0019834	MF	phospholipase A2 inhibitor activity	6	1	0.0323431	LIHC
GO:0060090	MF	molecular adaptor activity	478	10	0.0323989	LIHC
GO:0034219	BP	carbohydrate transmembrane transport	128	4	0.0325851	LIHC
GO:0031330	BP	negative regulation of cellular catabolic process	237	6	0.0326095	LIHC
GO:0019072	BP	viral genome packaging	2	1	0.0327395	LIHC
GO:0019074	BP	viral RNA genome packaging	2	1	0.0327395	LIHC
GO:0042180	BP	cellular ketone metabolic process	215	5	0.0328083	LIHC
GO:0048874	BP	host-mediated regulation of intestinal microbiota composition	6	1	0.0328584	LIHC
GO:0016561	BP	protein import into peroxisome matrix, translocation	2	1	0.0328662	LIHC
GO:0060084	BP	synaptic transmission involved in micturition	3	1	0.0332816	LIHC
GO:0005520	MF	insulin-like growth factor binding	19	2	0.0334223	LIHC
GO:0140090	MF	membrane curvature sensor activity	3	1	0.0335266	LIHC
GO:0006629	BP	lipid metabolic process	1361	19	0.0335562	LIHC
GO:0090164	BP	asymmetric Golgi ribbon formation	2	1	0.0336189	LIHC
GO:1905056	MF	P-type calcium transporter activity involved in regulation of presynaptic cytosolic calcium ion concentration	3	1	0.0338111	LIHC
GO:0062023	CC	collagen-containing extracellular matrix	416	9	0.0340169	LIHC
GO:0003014	BP	renal system process	120	4	0.0340678	LIHC
GO:0035239	BP	tube morphogenesis	921	17	0.0341546	LIHC
GO:0045600	BP	positive regulation of fat cell differentiation	70	3	0.0341834	LIHC
GO:0072562	CC	blood microparticle	106	3	0.0341846	LIHC
GO:0032133	CC	chromosome passenger complex	6	1	0.0342797	LIHC
GO:0031490	MF	chromatin DNA binding	116	4	0.0344909	LIHC
GO:0031012	CC	extracellular matrix	548	11	0.0346342	LIHC
GO:0005150	MF	interleukin-1, type I receptor binding	2	1	0.0346784	LIHC
GO:0043551	BP	regulation of phosphatidylinositol 3-kinase activity	52	3	0.0347637	LIHC
GO:0030312	CC	external encapsulating structure	549	11	0.0348579	LIHC
GO:0006900	BP	vesicle budding from membrane	80	3	0.0350125	LIHC
GO:0070209	CC	ASTRA complex	3	1	0.0350628	LIHC
GO:0110078	CC	TTT complex	3	1	0.0350628	LIHC
GO:0033043	BP	regulation of organelle organization	1158	18	0.0351037	LIHC
GO:0061073	BP	ciliary body morphogenesis	4	1	0.0351193	LIHC
GO:0019864	MF	IgG binding	7	1	0.0351233	LIHC
GO:2000645	BP	negative regulation of receptor catabolic process	3	1	0.0351476	LIHC
GO:0090733	CC	tenascin complex	3	1	0.0352197	LIHC
GO:0042023	BP	DNA endoreduplication	4	1	0.0353825	LIHC
GO:0070851	MF	growth factor receptor binding	136	4	0.0354947	LIHC
GO:0007274	BP	neuromuscular synaptic transmission	25	2	0.0355122	LIHC
GO:0033674	BP	positive regulation of kinase activity	470	10	0.0356798	LIHC
GO:0045892	BP	negative regulation of DNA-templated transcription	1240	21	0.0356914	LIHC
GO:1903507	BP	negative regulation of nucleic acid-templated transcription	1242	21	0.0359049	LIHC
GO:1902679	BP	negative regulation of RNA biosynthetic process	1244	21	0.0360863	LIHC
GO:0051148	BP	negative regulation of muscle cell differentiation	68	3	0.0361617	LIHC
GO:0002051	BP	osteoblast fate commitment	3	1	0.0363064	LIHC
GO:0006897	BP	endocytosis	571	11	0.0363445	LIHC
GO:0042886	BP	amide transport	294	7	0.0363631	LIHC
GO:0051301	BP	cell division	628	11	0.0363682	LIHC
GO:1900127	BP	positive regulation of hyaluronan biosynthetic process	4	1	0.0364519	LIHC
GO:1903317	BP	regulation of protein maturation	69	3	0.0365785	LIHC
GO:1990429	CC	peroxisomal importomer complex	3	1	0.0366819	LIHC
GO:0043878	MF	glyceraldehyde-3-phosphate dehydrogenase (NAD+) (non-phosphorylating) activity	7	1	0.0367722	LIHC
GO:0042246	BP	tissue regeneration	68	3	0.0367744	LIHC
GO:0050657	BP	nucleic acid transport	154	4	0.0368004	LIHC
GO:0050658	BP	RNA transport	154	4	0.0368004	LIHC
GO:0031328	BP	positive regulation of cellular biosynthetic process	1973	29	0.0368975	LIHC
GO:0030193	BP	regulation of blood coagulation	68	3	0.0369143	LIHC
GO:0005152	MF	interleukin-1 receptor antagonist activity	3	1	0.0369215	LIHC
GO:0051156	BP	glucose 6-phosphate metabolic process	27	2	0.0371895	LIHC
GO:0099103	MF	channel activator activity	4	1	0.0375145	LIHC
GO:0099104	MF	potassium channel activator activity	4	1	0.0375145	LIHC
GO:0033596	CC	TSC1-TSC2 complex	3	1	0.0376383	LIHC
GO:0008607	MF	phosphorylase kinase regulator activity	3	1	0.0379725	LIHC
GO:1903034	BP	regulation of response to wounding	169	5	0.0382006	LIHC
GO:0046879	BP	hormone secretion	289	7	0.0382804	LIHC
GO:0016842	MF	amidine-lyase activity	7	1	0.0383629	LIHC
GO:0097355	BP	protein localization to heterochromatin	3	1	0.0385073	LIHC
GO:0031400	BP	negative regulation of protein modification process	506	10	0.0386858	LIHC
GO:0020016	CC	ciliary pocket	3	1	0.0387048	LIHC
GO:0020018	CC	ciliary pocket membrane	3	1	0.0387048	LIHC
GO:0044301	CC	climbing fiber	2	1	0.038747	LIHC
GO:1901185	BP	negative regulation of ERBB signaling pathway	31	2	0.0389245	LIHC
GO:0004857	MF	enzyme inhibitor activity	374	7	0.0389507	LIHC
GO:0000792	CC	heterochromatin	78	3	0.0389596	LIHC
GO:0051236	BP	establishment of RNA localization	157	4	0.0390565	LIHC
GO:0045599	BP	negative regulation of fat cell differentiation	59	3	0.0392603	LIHC
GO:0034308	BP	primary alcohol metabolic process	104	3	0.0393439	LIHC
GO:1903490	BP	positive regulation of mitotic cytokinesis	7	1	0.0395132	LIHC
GO:0090271	BP	positive regulation of fibroblast growth factor production	4	1	0.0396002	LIHC
GO:1903036	BP	positive regulation of response to wounding	75	3	0.0396396	LIHC
GO:0010827	BP	regulation of glucose transmembrane transport	75	3	0.0398057	LIHC
GO:0030718	BP	germ-line stem cell population maintenance	4	1	0.0399229	LIHC
GO:1900046	BP	regulation of hemostasis	70	3	0.0399509	LIHC
GO:1904928	MF	coreceptor activity involved in canonical Wnt signaling pathway	3	1	0.0399794	LIHC
GO:0014901	BP	satellite cell activation involved in skeletal muscle regeneration	5	1	0.040035	LIHC
GO:0042427	BP	serotonin biosynthetic process	4	1	0.0401109	LIHC
GO:0050818	BP	regulation of coagulation	73	3	0.0401906	LIHC
GO:2000299	BP	negative regulation of Rho-dependent protein serine/threonine kinase activity	3	1	0.0403363	LIHC
GO:0031327	BP	negative regulation of cellular biosynthetic process	1592	24	0.0405246	LIHC
GO:0005996	BP	monosaccharide metabolic process	244	6	0.0407532	LIHC
GO:0046883	BP	regulation of hormone secretion	233	6	0.0410291	LIHC
GO:1990258	BP	histone glutamine methylation	4	1	0.0410481	LIHC
GO:0046323	BP	glucose import	74	3	0.0412891	LIHC
GO:2001251	BP	negative regulation of chromosome organization	94	3	0.0413048	LIHC
GO:0032079	BP	positive regulation of endodeoxyribonuclease activity	4	1	0.0414706	LIHC
GO:1902731	BP	negative regulation of chondrocyte proliferation	6	1	0.0416194	LIHC
GO:0045935	BP	positive regulation of nucleobase-containing compound metabolic process	1998	29	0.041931	LIHC
GO:0030620	MF	U2 snRNA binding	6	1	0.0420457	LIHC
GO:0004860	MF	protein kinase inhibitor activity	69	3	0.0423857	LIHC
GO:0006468	BP	protein phosphorylation	1513	23	0.042393	LIHC
GO:0060998	BP	regulation of dendritic spine development	52	3	0.042638	LIHC
GO:0008050	BP	female courtship behavior	2	1	0.0426745	LIHC
GO:0051254	BP	positive regulation of RNA metabolic process	1796	27	0.0428305	LIHC
GO:0042439	BP	ethanolamine-containing compound metabolic process	8	1	0.0428427	LIHC
GO:0005853	CC	eukaryotic translation elongation factor 1 complex	4	1	0.0428684	LIHC
GO:0009914	BP	hormone transport	298	7	0.0430412	LIHC
GO:0046885	BP	regulation of hormone biosynthetic process	25	2	0.0431025	LIHC
GO:0030199	BP	collagen fibril organization	62	3	0.0432219	LIHC
GO:0120099	CC	procentriole replication complex	6	1	0.0434657	LIHC
GO:0010800	BP	positive regulation of peptidyl-threonine phosphorylation	29	2	0.0439343	LIHC
GO:0001932	BP	regulation of protein phosphorylation	1067	17	0.0441741	LIHC
GO:0050810	BP	regulation of steroid biosynthetic process	73	3	0.0446591	LIHC
GO:0050000	BP	chromosome localization	88	3	0.0446696	LIHC
GO:0044786	BP	cell cycle DNA replication	42	2	0.0447305	LIHC
GO:0018076	BP	N-terminal peptidyl-lysine acetylation	4	1	0.044797	LIHC
GO:0060444	BP	branching involved in mammary gland duct morphogenesis	22	2	0.045159	LIHC
GO:0016125	BP	sterol metabolic process	151	4	0.0452024	LIHC
GO:0005000	MF	vasopressin receptor activity	7	1	0.0452357	LIHC
GO:0019827	BP	stem cell population maintenance	177	5	0.0454188	LIHC
GO:0062012	BP	regulation of small molecule metabolic process	332	7	0.0454384	LIHC
GO:0043406	BP	positive regulation of MAP kinase activity	114	4	0.0454397	LIHC
GO:0009891	BP	positive regulation of biosynthetic process	2015	29	0.0455004	LIHC
GO:0060809	BP	mesodermal to mesenchymal transition involved in gastrulation	3	1	0.0455298	LIHC
GO:0008608	BP	attachment of spindle microtubules to kinetochore	43	2	0.0458607	LIHC
GO:0019210	MF	kinase inhibitor activity	73	3	0.0458914	LIHC
GO:0006898	BP	receptor-mediated endocytosis	251	6	0.0460028	LIHC
GO:0005112	MF	Notch binding	23	2	0.0460307	LIHC
GO:0042325	BP	regulation of phosphorylation	1206	19	0.0462984	LIHC
GO:0110135	BP	Norrin signaling pathway	3	1	0.0464243	LIHC
GO:0010647	BP	positive regulation of cell communication	1710	25	0.046464	LIHC
GO:0032465	BP	regulation of cytokinesis	91	3	0.0464648	LIHC
GO:0042594	BP	response to starvation	205	5	0.0467618	LIHC
GO:0035867	CC	alphav-beta3 integrin-IGF-1-IGF1R complex	4	1	0.0467946	LIHC
GO:0009890	BP	negative regulation of biosynthetic process	1621	24	0.0470104	LIHC
GO:0035924	BP	cellular response to vascular endothelial growth factor stimulus	70	3	0.0470582	LIHC
GO:0010512	BP	negative regulation of phosphatidylinositol biosynthetic process	2	1	0.0471483	LIHC
GO:1990265	CC	platelet-derived growth factor complex	2	1	0.0471483	LIHC
GO:0008078	BP	mesodermal cell migration	4	1	0.0471812	LIHC
GO:0032809	CC	neuronal cell body membrane	29	2	0.047188	LIHC
GO:0045669	BP	positive regulation of osteoblast differentiation	74	3	0.0473518	LIHC
GO:0009051	BP	pentose-phosphate shunt, oxidative branch	4	1	0.047492	LIHC
GO:0032506	BP	cytokinetic process	39	2	0.0476226	LIHC
GO:0018364	BP	peptidyl-glutamine methylation	6	1	0.0476473	LIHC
GO:0008022	MF	protein C-terminus binding	181	5	0.0476488	LIHC
GO:0070316	BP	regulation of G0 to G1 transition	38	2	0.0476758	LIHC
GO:0008286	BP	insulin receptor signaling pathway	117	4	0.0477917	LIHC
GO:0032382	BP	positive regulation of intracellular sterol transport	4	1	0.0478299	LIHC
GO:0032385	BP	positive regulation of intracellular cholesterol transport	4	1	0.0478299	LIHC
GO:0006007	BP	glucose catabolic process	25	2	0.0478342	LIHC
GO:0006068	BP	ethanol catabolic process	9	1	0.0480948	LIHC
GO:0007619	BP	courtship behavior	3	1	0.0484798	LIHC
GO:0061045	BP	negative regulation of wound healing	75	3	0.0485064	LIHC
GO:0016363	CC	nuclear matrix	126	4	0.0486727	LIHC
GO:1902423	BP	regulation of attachment of mitotic spindle microtubules to kinetochore	8	1	0.0487385	LIHC
GO:1902425	BP	positive regulation of attachment of mitotic spindle microtubules to kinetochore	8	1	0.0487385	LIHC
GO:0071105	BP	response to interleukin-11	2	1	0.0487393	LIHC
GO:1905898	BP	positive regulation of response to endoplasmic reticulum stress	35	2	0.0488616	LIHC
GO:0098727	BP	maintenance of cell number	181	5	0.048997	LIHC
GO:0042304	BP	regulation of fatty acid biosynthetic process	49	2	0.0491909	LIHC
GO:0051128	BP	regulation of cellular component organization	2316	33	0.0492995	LIHC
GO:0045737	BP	positive regulation of cyclin-dependent protein serine/threonine kinase activity	33	2	0.0493127	LIHC
GO:1990604	CC	IRE1-TRAF2-ASK1 complex	4	1	0.0496722	LIHC
GO:0042435	BP	indole-containing compound biosynthetic process	5	1	0.0497782	LIHC

## Sheet: LUAD
ID	ONTOLOGY	TERM	N	DE	P.DE	Cancer
GO:0003183	BP	mitral valve morphogenesis	10	5	0.00024431	LUAD
GO:0003174	BP	mitral valve development	11	5	0.000381933	LUAD
GO:0120014	MF	phospholipid transfer activity	25	6	0.000775172	LUAD
GO:1902387	MF	ceramide 1-phosphate binding	8	3	0.000867688	LUAD
GO:1902388	MF	ceramide 1-phosphate transfer activity	8	3	0.000948929	LUAD
GO:1902389	BP	ceramide 1-phosphate transport	8	3	0.000948929	LUAD
GO:0120017	MF	ceramide transfer activity	9	3	0.00178392	LUAD
GO:0043217	BP	myelin maintenance	18	5	0.0020814	LUAD
GO:0120009	BP	intermembrane lipid transfer	50	8	0.00212379	LUAD
GO:0120013	MF	lipid transfer activity	50	8	0.00212379	LUAD
GO:0032286	BP	central nervous system myelin maintenance	5	3	0.00214018	LUAD
GO:0007015	BP	actin filament organization	442	37	0.00232511	LUAD
GO:0005138	MF	interleukin-6 receptor binding	7	3	0.0024833	LUAD
GO:0016810	MF	hydrolase activity, acting on carbon-nitrogen (but not peptide) bonds	127	12	0.00257538	LUAD
GO:0002384	BP	hepatic immune response	2	2	0.00272817	LUAD
GO:0051935	BP	glutamate reuptake	6	3	0.00275101	LUAD
GO:0005024	MF	transforming growth factor beta receptor activity	12	4	0.0028059	LUAD
GO:0120016	MF	sphingolipid transfer activity	10	3	0.00280922	LUAD
GO:0003181	BP	atrioventricular valve morphogenesis	24	6	0.0029558	LUAD
GO:0009396	BP	folic acid-containing compound biosynthetic process	9	3	0.00336605	LUAD
GO:0031022	BP	nuclear migration along microfilament	2	2	0.00358848	LUAD
GO:0005548	MF	phospholipid transporter activity	63	9	0.00373997	LUAD
GO:0046625	MF	sphingolipid binding	29	5	0.00397578	LUAD
GO:0031547	BP	brain-derived neurotrophic factor receptor signaling pathway	6	3	0.00399777	LUAD
GO:0004176	MF	ATP-dependent peptidase activity	7	3	0.00414132	LUAD
GO:0005745	CC	m-AAA complex	2	2	0.00446959	LUAD
GO:0003252	BP	negative regulation of cell proliferation involved in heart valve morphogenesis	2	2	0.00476054	LUAD
GO:0003171	BP	atrioventricular valve development	27	6	0.00477284	LUAD
GO:0070290	MF	N-acylphosphatidylethanolamine-specific phospholipase D activity	3	2	0.00491307	LUAD
GO:0046040	BP	IMP metabolic process	18	4	0.00511888	LUAD
GO:0007010	BP	cytoskeleton organization	1468	91	0.00515118	LUAD
GO:0004674	MF	protein serine/threonine kinase activity	420	34	0.00517196	LUAD
GO:0046365	BP	monosaccharide catabolic process	46	7	0.00539721	LUAD
GO:0097001	MF	ceramide binding	20	4	0.0054304	LUAD
GO:0048625	BP	myoblast fate commitment	6	3	0.00545808	LUAD
GO:0045296	MF	cadherin binding	330	27	0.00580175	LUAD
GO:0070820	CC	tertiary granule	161	13	0.00630575	LUAD
GO:1902996	BP	regulation of neurofibrillary tangle assembly	2	2	0.00658565	LUAD
GO:0005896	CC	interleukin-6 receptor complex	3	2	0.00663557	LUAD
GO:0043547	BP	positive regulation of GTPase activity	260	23	0.00677957	LUAD
GO:0033116	CC	endoplasmic reticulum-Golgi intermediate compartment membrane	77	9	0.00679032	LUAD
GO:0050774	BP	negative regulation of dendrite morphogenesis	9	3	0.00707896	LUAD
GO:0006188	BP	IMP biosynthetic process	11	3	0.00727831	LUAD
GO:0019323	BP	pentose catabolic process	4	2	0.00755791	LUAD
GO:0120157	CC	PAR polarity complex	3	2	0.00768289	LUAD
GO:0140096	MF	catalytic activity, acting on a protein	2148	119	0.00796498	LUAD
GO:0002250	BP	adaptive immune response	417	27	0.00800903	LUAD
GO:0007352	BP	zygotic specification of dorsal/ventral axis	3	2	0.00823542	LUAD
GO:0004672	MF	protein kinase activity	555	42	0.00831731	LUAD
GO:0010718	BP	positive regulation of epithelial to mesenchymal transition	55	8	0.00832378	LUAD
GO:0003876	MF	AMP deaminase activity	3	2	0.00839261	LUAD
GO:0047623	MF	adenosine-phosphate deaminase activity	3	2	0.00839261	LUAD
GO:0046907	BP	intracellular transport	1523	86	0.008436	LUAD
GO:0045606	BP	positive regulation of epidermal cell differentiation	28	5	0.00874836	LUAD
GO:0098712	BP	L-glutamate import across plasma membrane	17	4	0.00894364	LUAD
GO:2000271	BP	positive regulation of fibroblast apoptotic process	10	3	0.00920952	LUAD
GO:0045618	BP	positive regulation of keratinocyte differentiation	19	4	0.00921004	LUAD
GO:0032153	CC	cell division site	70	9	0.00924458	LUAD
GO:0001018	MF	mitochondrial promoter sequence-specific DNA binding	3	2	0.00937586	LUAD
GO:0090279	BP	regulation of calcium ion import	33	5	0.00954261	LUAD
GO:2000297	BP	negative regulation of synapse maturation	3	2	0.00971297	LUAD
GO:0003249	BP	cell proliferation involved in heart valve morphogenesis	3	2	0.009797	LUAD
GO:0003250	BP	regulation of cell proliferation involved in heart valve morphogenesis	3	2	0.009797	LUAD
GO:0072538	BP	T-helper 17 type immune response	43	6	0.00993118	LUAD
GO:1903799	BP	negative regulation of miRNA maturation	15	4	0.0101492	LUAD
GO:0045669	BP	positive regulation of osteoblast differentiation	74	9	0.010399	LUAD
GO:0031902	CC	late endosome membrane	146	13	0.0105263	LUAD
GO:0005925	CC	focal adhesion	419	33	0.0107927	LUAD
GO:1902263	BP	apoptotic process involved in embryonic digit morphogenesis	3	2	0.0109046	LUAD
GO:0003281	BP	ventricular septum development	74	10	0.0109739	LUAD
GO:0035331	BP	negative regulation of hippo signaling	13	4	0.0109861	LUAD
GO:0004675	MF	transmembrane receptor protein serine/threonine kinase activity	18	4	0.0109989	LUAD
GO:1903649	BP	regulation of cytoplasmic transport	28	5	0.0114647	LUAD
GO:0060841	BP	venous blood vessel development	16	4	0.0115704	LUAD
GO:0008242	MF	omega peptidase activity	11	3	0.0117484	LUAD
GO:0044194	CC	cytolytic granule	13	3	0.0117849	LUAD
GO:0007160	BP	cell-matrix adhesion	236	21	0.0121913	LUAD
GO:0060391	BP	positive regulation of SMAD protein signal transduction	18	4	0.0124233	LUAD
GO:1900262	BP	regulation of DNA-directed DNA polymerase activity	13	3	0.0128635	LUAD
GO:1900264	BP	positive regulation of DNA-directed DNA polymerase activity	13	3	0.0128635	LUAD
GO:0070649	BP	formin-nucleated actin cable assembly	3	2	0.0129714	LUAD
GO:0110009	BP	formin-nucleated actin cable organization	3	2	0.0129714	LUAD
GO:0042559	BP	pteridine-containing compound biosynthetic process	14	3	0.0131144	LUAD
GO:0007005	BP	mitochondrion organization	525	32	0.0131468	LUAD
GO:0016773	MF	phosphotransferase activity, alcohol group as acceptor	660	47	0.0131748	LUAD
GO:0048471	CC	perinuclear region of cytoplasm	719	47	0.0131995	LUAD
GO:0061024	BP	membrane organization	794	49	0.0132164	LUAD
GO:0010814	BP	substance P catabolic process	3	2	0.0132749	LUAD
GO:0003692	MF	left-handed Z-DNA binding	1	1	0.0133062	LUAD
GO:0051941	BP	regulation of amino acid uptake involved in synaptic transmission	4	2	0.0133591	LUAD
GO:0051946	BP	regulation of glutamate uptake involved in transmission of nerve impulse	4	2	0.0133591	LUAD
GO:0030036	BP	actin cytoskeleton organization	715	51	0.0133803	LUAD
GO:0090543	CC	Flemming body	32	5	0.013532	LUAD
GO:0090232	BP	positive regulation of spindle checkpoint	12	3	0.0139882	LUAD
GO:0090267	BP	positive regulation of mitotic cell cycle spindle assembly checkpoint	12	3	0.0139882	LUAD
GO:0006796	BP	phosphate-containing compound metabolic process	2696	145	0.0140174	LUAD
GO:0007034	BP	vacuolar transport	158	14	0.0142864	LUAD
GO:0032154	CC	cleavage furrow	52	7	0.0146699	LUAD
GO:0030278	BP	regulation of ossification	120	13	0.0147272	LUAD
GO:0045684	BP	positive regulation of epidermis development	33	5	0.01482	LUAD
GO:0006793	BP	phosphorus metabolic process	2722	146	0.0148382	LUAD
GO:0030055	CC	cell-substrate junction	429	33	0.0148839	LUAD
GO:0019706	MF	protein-cysteine S-palmitoyltransferase activity	25	4	0.0149056	LUAD
GO:0019707	MF	protein-cysteine S-acyltransferase activity	25	4	0.0149056	LUAD
GO:0016811	MF	hydrolase activity, acting on carbon-nitrogen (but not peptide) bonds, in linear amides	70	7	0.0150582	LUAD
GO:0043023	MF	ribosomal large subunit binding	14	3	0.0150827	LUAD
GO:0034713	MF	type I transforming growth factor beta receptor binding	11	3	0.0151947	LUAD
GO:0033148	BP	positive regulation of intracellular estrogen receptor signaling pathway	11	3	0.0153373	LUAD
GO:0048845	BP	venous blood vessel morphogenesis	9	3	0.0153987	LUAD
GO:0004699	MF	calcium-independent protein kinase C activity	3	2	0.0154317	LUAD
GO:0030903	BP	notochord development	18	4	0.0154868	LUAD
GO:0007264	BP	small GTPase mediated signal transduction	492	36	0.0155921	LUAD
GO:0110053	BP	regulation of actin filament organization	269	22	0.015854	LUAD
GO:0031257	CC	cell trailing edge membrane	1	1	0.015957	LUAD
GO:0031259	CC	uropod membrane	1	1	0.015957	LUAD
GO:0038123	BP	toll-like receptor TLR1:TLR2 signaling pathway	1	1	0.015957	LUAD
GO:0140205	BP	oligopeptide import across plasma membrane	5	2	0.0159917	LUAD
GO:0140206	BP	dipeptide import across plasma membrane	5	2	0.0159917	LUAD
GO:0051933	BP	amino acid neurotransmitter reuptake	10	3	0.0160937	LUAD
GO:0031589	BP	cell-substrate adhesion	363	29	0.0162982	LUAD
GO:0016301	MF	kinase activity	711	49	0.016346	LUAD
GO:0060390	BP	regulation of SMAD protein signal transduction	31	5	0.016806	LUAD
GO:0004061	MF	arylformamidase activity	1	1	0.0173666	LUAD
GO:1902903	BP	regulation of supramolecular fiber organization	373	28	0.0175795	LUAD
GO:0060545	BP	positive regulation of necroptotic process	8	2	0.0178363	LUAD
GO:0005025	MF	transforming growth factor beta receptor activity, type I	5	2	0.0178863	LUAD
GO:0016052	BP	carbohydrate catabolic process	152	13	0.0179078	LUAD
GO:0010813	BP	neuropeptide catabolic process	4	2	0.0180863	LUAD
GO:0040038	BP	polar body extrusion after meiotic divisions	4	2	0.018109	LUAD
GO:0005829	CC	cytosol	5257	255	0.0185769	LUAD
GO:0047186	MF	N-acetylneuraminate 7-O(or 9-O)-acetyltransferase activity	1	1	0.018682	LUAD
GO:0045667	BP	regulation of osteoblast differentiation	139	13	0.0193654	LUAD
GO:0018729	MF	propionate CoA-transferase activity	1	1	0.0195435	LUAD
GO:0043759	MF	methylbutanoate-CoA ligase activity	1	1	0.0195435	LUAD
GO:0043022	MF	ribosome binding	65	7	0.0196857	LUAD
GO:0016482	BP	cytosolic transport	164	14	0.0197033	LUAD
GO:1902988	BP	neurofibrillary tangle assembly	3	2	0.019761	LUAD
GO:0071354	BP	cellular response to interleukin-6	41	5	0.0198702	LUAD
GO:0032264	BP	IMP salvage	5	2	0.0199738	LUAD
GO:0090100	BP	positive regulation of transmembrane receptor protein serine/threonine kinase signaling pathway	121	12	0.020178	LUAD
GO:0005543	MF	phospholipid binding	456	32	0.0202169	LUAD
GO:0071705	BP	nitrogen compound transport	1962	104	0.0204998	LUAD
GO:1900543	BP	negative regulation of purine nucleotide metabolic process	23	4	0.0206286	LUAD
GO:1901979	BP	regulation of inward rectifier potassium channel activity	7	2	0.0206397	LUAD
GO:0005160	MF	transforming growth factor beta receptor binding	23	4	0.0206672	LUAD
GO:0005911	CC	cell-cell junction	495	36	0.0206725	LUAD
GO:0008526	MF	phosphatidylinositol transfer activity	10	3	0.0207417	LUAD
GO:0015914	BP	phospholipid transport	103	10	0.020914	LUAD
GO:0030029	BP	actin filament-based process	804	55	0.0209399	LUAD
GO:0101002	CC	ficolin-1-rich granule	184	14	0.0210202	LUAD
GO:0030955	MF	potassium ion binding	12	3	0.0211393	LUAD
GO:1903003	BP	positive regulation of protein deubiquitination	6	2	0.0212109	LUAD
GO:1901524	BP	regulation of mitophagy	12	3	0.0215715	LUAD
GO:0043021	MF	ribonucleoprotein complex binding	151	12	0.0216501	LUAD
GO:0061640	BP	cytoskeleton-dependent cytokinesis	111	10	0.0216812	LUAD
GO:0047696	MF	beta-adrenergic receptor kinase activity	4	2	0.0217394	LUAD
GO:1905198	BP	manchette assembly	5	2	0.0221568	LUAD
GO:0033145	BP	positive regulation of intracellular steroid hormone receptor signaling pathway	12	3	0.0222879	LUAD
GO:0061384	BP	heart trabecula morphogenesis	32	5	0.0222904	LUAD
GO:0005010	MF	insulin-like growth factor receptor activity	3	2	0.0224006	LUAD
GO:2000793	BP	cell proliferation involved in heart valve development	4	2	0.0224311	LUAD
GO:1904376	BP	negative regulation of protein localization to cell periphery	26	4	0.0224919	LUAD
GO:0035196	BP	miRNA processing	56	7	0.0226936	LUAD
GO:0031430	CC	M band	23	4	0.0227338	LUAD
GO:0060395	BP	SMAD protein signal transduction	82	9	0.0227859	LUAD
GO:0031639	BP	plasminogen activation	27	4	0.0228808	LUAD
GO:0030272	MF	5-formyltetrahydrofolate cyclo-ligase activity	1	1	0.0228839	LUAD
GO:0046657	BP	folic acid catabolic process	1	1	0.0228839	LUAD
GO:0006171	BP	cAMP biosynthetic process	10	3	0.0229849	LUAD
GO:0002675	BP	positive regulation of acute inflammatory response	27	4	0.0229943	LUAD
GO:0140537	MF	transcription regulator activator activity	4	2	0.023057	LUAD
GO:0023035	BP	CD40 signaling pathway	16	3	0.0231637	LUAD
GO:0035627	BP	ceramide transport	17	3	0.0233704	LUAD
GO:1905457	BP	negative regulation of lymphoid progenitor cell differentiation	4	2	0.0236703	LUAD
GO:0002177	CC	manchette	15	3	0.0236989	LUAD
GO:0097435	BP	supramolecular fiber organization	794	51	0.0239276	LUAD
GO:0002690	BP	positive regulation of leukocyte chemotaxis	92	8	0.0240524	LUAD
GO:0005889	CC	potassium:proton exchanging ATPase complex	1	1	0.0240591	LUAD
GO:0005391	MF	P-type sodium:potassium-exchanging transporter activity	7	2	0.024273	LUAD
GO:0008554	MF	P-type sodium transporter activity	7	2	0.024273	LUAD
GO:0033367	BP	protein localization to mast cell secretory granule	1	1	0.0242925	LUAD
GO:0033368	BP	protease localization to mast cell secretory granule	1	1	0.0242925	LUAD
GO:0033370	BP	maintenance of protein location in mast cell secretory granule	1	1	0.0242925	LUAD
GO:0033371	BP	T cell secretory granule organization	1	1	0.0242925	LUAD
GO:0033373	BP	maintenance of protease location in mast cell secretory granule	1	1	0.0242925	LUAD
GO:0033374	BP	protein localization to T cell secretory granule	1	1	0.0242925	LUAD
GO:0033375	BP	protease localization to T cell secretory granule	1	1	0.0242925	LUAD
GO:0033377	BP	maintenance of protein location in T cell secretory granule	1	1	0.0242925	LUAD
GO:0033379	BP	maintenance of protease location in T cell secretory granule	1	1	0.0242925	LUAD
GO:0033380	BP	granzyme B localization to T cell secretory granule	1	1	0.0242925	LUAD
GO:0033382	BP	maintenance of granzyme B location in T cell secretory granule	1	1	0.0242925	LUAD
GO:0042581	CC	specific granule	157	12	0.0243621	LUAD
GO:1903297	BP	regulation of hypoxia-induced intrinsic apoptotic signaling pathway	6	2	0.0244623	LUAD
GO:1903298	BP	negative regulation of hypoxia-induced intrinsic apoptotic signaling pathway	6	2	0.0244623	LUAD
GO:0001179	MF	RNA polymerase I general transcription initiation factor binding	1	1	0.0245782	LUAD
GO:0036293	BP	response to decreased oxygen levels	303	23	0.0245959	LUAD
GO:0015942	BP	formate metabolic process	6	2	0.0246376	LUAD
GO:0051056	BP	regulation of small GTPase mediated signal transduction	294	24	0.024827	LUAD
GO:0018549	MF	methanethiol oxidase activity	1	1	0.0251277	LUAD
GO:2000659	BP	regulation of interleukin-1-mediated signaling pathway	10	2	0.025134	LUAD
GO:0051639	BP	actin filament network formation	12	3	0.025652	LUAD
GO:0016772	MF	transferase activity, transferring phosphorus-containing groups	852	54	0.0259054	LUAD
GO:0060039	BP	pericardium development	19	4	0.0259198	LUAD
GO:0097124	CC	cyclin A2-CDK2 complex	5	2	0.0259561	LUAD
GO:0120012	BP	intermembrane sphingolipid transfer	1	1	0.0259903	LUAD
GO:0006891	BP	intra-Golgi vesicle-mediated transport	32	4	0.0259915	LUAD
GO:0009190	BP	cyclic nucleotide biosynthetic process	22	4	0.0260042	LUAD
GO:0052652	BP	cyclic purine nucleotide metabolic process	22	4	0.0260042	LUAD
GO:0002003	BP	angiotensin maturation	9	2	0.0261173	LUAD
GO:0045053	BP	protein retention in Golgi apparatus	5	2	0.0263145	LUAD
GO:0070918	BP	small regulatory ncRNA processing	60	7	0.0267381	LUAD
GO:0010008	CC	endosome membrane	521	33	0.0270456	LUAD
GO:0003334	BP	keratinocyte development	13	3	0.0271114	LUAD
GO:0045980	BP	negative regulation of nucleotide metabolic process	25	4	0.02729	LUAD
GO:0004016	MF	adenylate cyclase activity	11	3	0.0273683	LUAD
GO:0030500	BP	regulation of bone mineralization	81	9	0.0275097	LUAD
GO:0030377	MF	urokinase plasminogen activator receptor activity	1	1	0.0275892	LUAD
GO:0090280	BP	positive regulation of calcium ion import	15	3	0.0276837	LUAD
GO:1903936	BP	cellular response to sodium arsenite	5	2	0.0277212	LUAD
GO:0016417	MF	S-acyltransferase activity	29	4	0.0277463	LUAD
GO:2001242	BP	regulation of intrinsic apoptotic signaling pathway	167	13	0.0280295	LUAD
GO:0016310	BP	phosphorylation	1781	101	0.0281823	LUAD
GO:0003241	BP	growth involved in heart morphogenesis	5	2	0.0283365	LUAD
GO:0031302	CC	intrinsic component of endosome membrane	4	2	0.0284348	LUAD
GO:0060965	BP	negative regulation of miRNA-mediated gene silencing	21	4	0.0285872	LUAD
GO:0016763	MF	pentosyltransferase activity	48	5	0.0290356	LUAD
GO:0070167	BP	regulation of biomineral tissue development	100	10	0.0291779	LUAD
GO:0016814	MF	hydrolase activity, acting on carbon-nitrogen (but not peptide) bonds, in cyclic amidines	35	4	0.0294736	LUAD
GO:0030038	BP	contractile actin filament bundle assembly	108	11	0.0295147	LUAD
GO:0043149	BP	stress fiber assembly	108	11	0.0295147	LUAD
GO:0070741	BP	response to interleukin-6	44	5	0.0295608	LUAD
GO:0061436	BP	establishment of skin barrier	27	4	0.0297329	LUAD
GO:0140808	MF	NAD+-protein-tyrosine ADP-ribosyltransferase activity	1	1	0.0298831	LUAD
GO:0140815	MF	NAD+-protein-histidine ADP-ribosyltransferase activity	1	1	0.0298831	LUAD
GO:0035442	BP	dipeptide transmembrane transport	7	2	0.0299436	LUAD
GO:0042938	BP	dipeptide transport	7	2	0.0299436	LUAD
GO:0062100	BP	positive regulation of programmed necrotic cell death	9	2	0.0301554	LUAD
GO:0007041	BP	lysosomal transport	125	11	0.0302578	LUAD
GO:1904724	CC	tertiary granule lumen	54	5	0.0303055	LUAD
GO:0032052	MF	bile acid binding	11	2	0.0304014	LUAD
GO:0033819	MF	lipoyl(octanoyl) transferase activity	1	1	0.0307553	LUAD
GO:0021989	BP	olfactory cortex development	1	1	0.0308916	LUAD
GO:1903280	BP	negative regulation of calcium:sodium antiporter activity	1	1	0.0308916	LUAD
GO:0046654	BP	tetrahydrofolate biosynthetic process	7	2	0.0310027	LUAD
GO:0051641	BP	cellular localization	3257	167	0.0310669	LUAD
GO:0043171	BP	peptide catabolic process	27	4	0.0311283	LUAD
GO:1905090	BP	negative regulation of parkin-mediated stimulation of mitophagy in response to mitochondrial depolarization	1	1	0.0311555	LUAD
GO:0015031	BP	protein transport	1514	81	0.0312218	LUAD
GO:2000137	BP	negative regulation of cell proliferation involved in heart morphogenesis	5	2	0.0314004	LUAD
GO:0070262	BP	peptidyl-serine dephosphorylation	15	3	0.0314126	LUAD
GO:0032103	BP	positive regulation of response to external stimulus	445	26	0.0315995	LUAD
GO:0072144	BP	glomerular mesangial cell development	5	2	0.0317872	LUAD
GO:0004707	MF	MAP kinase activity	16	3	0.0318543	LUAD
GO:0008289	MF	lipid binding	802	48	0.0319858	LUAD
GO:0000812	CC	Swr1 complex	14	3	0.0320809	LUAD
GO:0070482	BP	response to oxygen levels	330	24	0.0321462	LUAD
GO:0042398	BP	cellular modified amino acid biosynthetic process	42	5	0.0323083	LUAD
GO:0015024	MF	glucuronate-2-sulfatase activity	1	1	0.0323425	LUAD
GO:0098821	MF	BMP receptor activity	7	2	0.0324259	LUAD
GO:0000287	MF	magnesium ion binding	218	16	0.0325609	LUAD
GO:0051295	BP	establishment of meiotic spindle localization	5	2	0.03258	LUAD
GO:0110149	BP	regulation of biomineralization	102	10	0.0327079	LUAD
GO:0002002	BP	regulation of angiotensin levels in blood	10	2	0.0328198	LUAD
GO:0008962	MF	phosphatidylglycerophosphatase activity	1	1	0.0329312	LUAD
GO:0060149	BP	negative regulation of post-transcriptional gene silencing	22	4	0.033083	LUAD
GO:0060967	BP	negative regulation of gene silencing by RNA	22	4	0.033083	LUAD
GO:1900369	BP	negative regulation of post-transcriptional gene silencing by RNA	22	4	0.033083	LUAD
GO:0102200	MF	N-acetylphosphatidylethanolamine-hydrolysing phospholipase activity	1	1	0.0333026	LUAD
GO:0007183	BP	SMAD protein complex assembly	13	3	0.033322	LUAD
GO:0031053	BP	primary miRNA processing	16	3	0.033351	LUAD
GO:0090200	BP	positive regulation of release of cytochrome c from mitochondria	27	4	0.0334864	LUAD
GO:0002474	BP	antigen processing and presentation of peptide antigen via MHC class I	28	4	0.0336369	LUAD
GO:0014860	BP	neurotransmitter secretion involved in regulation of skeletal muscle contraction	1	1	0.0336404	LUAD
GO:0050927	BP	positive regulation of positive chemotaxis	24	4	0.0336641	LUAD
GO:0002639	BP	positive regulation of immunoglobulin production	50	5	0.0339897	LUAD
GO:0002505	BP	antigen processing and presentation of polysaccharide antigen via MHC class II	1	1	0.0341414	LUAD
GO:0002747	BP	antigen processing and presentation following phagocytosis	1	1	0.0341414	LUAD
GO:0046754	BP	viral exocytosis	1	1	0.0341414	LUAD
GO:0009187	BP	cyclic nucleotide metabolic process	40	6	0.03427	LUAD
GO:0062050	MF	GPI-mannose ethanolamine phosphate phosphodiesterase activity	1	1	0.034478	LUAD
GO:0006530	BP	asparagine catabolic process	1	1	0.0347124	LUAD
GO:0033345	BP	asparagine catabolic process via L-aspartate	1	1	0.0347124	LUAD
GO:0045822	BP	negative regulation of heart contraction	25	4	0.0347532	LUAD
GO:1904044	BP	response to aldosterone	14	3	0.034788	LUAD
GO:0046653	BP	tetrahydrofolate metabolic process	17	3	0.0348255	LUAD
GO:0001503	BP	ossification	422	30	0.0348354	LUAD
GO:0061383	BP	trabecula morphogenesis	47	6	0.0349267	LUAD
GO:0001781	BP	neutrophil apoptotic process	8	2	0.0350301	LUAD
GO:1902339	BP	positive regulation of apoptotic process involved in morphogenesis	5	2	0.0351142	LUAD
GO:1990448	MF	exon-exon junction complex binding	1	1	0.0351267	LUAD
GO:0033313	BP	meiotic cell cycle checkpoint signaling	8	2	0.0351728	LUAD
GO:0051413	BP	response to cortisone	1	1	0.0352125	LUAD
GO:0006622	BP	protein targeting to lysosome	29	4	0.0354366	LUAD
GO:0002712	BP	regulation of B cell mediated immunity	61	6	0.0356015	LUAD
GO:0002889	BP	regulation of immunoglobulin mediated immune response	61	6	0.0356015	LUAD
GO:1904813	CC	ficolin-1-rich granule lumen	124	10	0.0356479	LUAD
GO:0048193	BP	Golgi vesicle transport	284	19	0.0357115	LUAD
GO:0036089	BP	cleavage furrow formation	7	2	0.0357453	LUAD
GO:0019103	MF	pyrimidine nucleotide binding	7	2	0.0359669	LUAD
GO:0000140	MF	acylglycerone-phosphate reductase activity	1	1	0.0361688	LUAD
GO:0042843	BP	D-xylose catabolic process	1	1	0.0362342	LUAD
GO:0047837	MF	D-xylose 1-dehydrogenase (NADP+) activity	1	1	0.0362342	LUAD
GO:1903935	BP	response to sodium arsenite	6	2	0.0364642	LUAD
GO:0050926	BP	regulation of positive chemotaxis	25	4	0.0365396	LUAD
GO:0150115	BP	cell-substrate junction organization	101	11	0.036569	LUAD
GO:1903651	BP	positive regulation of cytoplasmic transport	13	3	0.0368176	LUAD
GO:0034330	BP	cell junction organization	693	48	0.0370366	LUAD
GO:0006253	BP	dCTP catabolic process	1	1	0.0372418	LUAD
GO:0032556	MF	pyrimidine deoxyribonucleotide binding	1	1	0.0372418	LUAD
GO:0046065	BP	dCTP metabolic process	1	1	0.0372418	LUAD
GO:0047840	MF	dCTP diphosphatase activity	1	1	0.0372418	LUAD
GO:0070168	BP	negative regulation of biomineral tissue development	28	4	0.0372799	LUAD
GO:0006753	BP	nucleoside phosphate metabolic process	579	33	0.0375555	LUAD
GO:0010810	BP	regulation of cell-substrate adhesion	219	18	0.0375822	LUAD
GO:0035754	BP	B cell chemotaxis	6	2	0.03763	LUAD
GO:0003186	BP	tricuspid valve morphogenesis	5	2	0.0379662	LUAD
GO:2001233	BP	regulation of apoptotic signaling pathway	364	24	0.0380231	LUAD
GO:0002253	BP	activation of immune response	304	19	0.0380948	LUAD
GO:0046034	BP	ATP metabolic process	205	14	0.0384611	LUAD
GO:1904747	BP	positive regulation of apoptotic process involved in development	6	2	0.0385569	LUAD
GO:0050080	MF	malonyl-CoA decarboxylase activity	1	1	0.0385672	LUAD
GO:0005294	MF	neutral L-amino acid secondary active transmembrane transporter activity	1	1	0.0385908	LUAD
GO:0015327	MF	cystine:glutamate antiporter activity	1	1	0.0385908	LUAD
GO:0015328	MF	cystine secondary active transmembrane transporter activity	1	1	0.0385908	LUAD
GO:1901494	BP	regulation of cysteine metabolic process	1	1	0.0385908	LUAD
GO:0001836	BP	release of cytochrome c from mitochondria	56	6	0.0386385	LUAD
GO:0110150	BP	negative regulation of biomineralization	29	4	0.0388984	LUAD
GO:0032432	CC	actin filament bundle	78	9	0.0391114	LUAD
GO:0001850	MF	complement component C3a binding	1	1	0.0391617	LUAD
GO:0016064	BP	immunoglobulin mediated immune response	133	10	0.0391852	LUAD
GO:0005319	MF	lipid transporter activity	158	12	0.0392429	LUAD
GO:1901525	BP	negative regulation of mitophagy	6	2	0.039513	LUAD
GO:0006915	BP	apoptotic process	1859	100	0.0395264	LUAD
GO:0060731	BP	positive regulation of intestinal epithelial structure maintenance	1	1	0.0396494	LUAD
GO:0070715	BP	sodium-dependent organic cation transport	1	1	0.0396494	LUAD
GO:0010857	MF	calcium-dependent protein kinase activity	23	4	0.0399661	LUAD
GO:0051924	BP	regulation of calcium ion transport	265	19	0.040044	LUAD
GO:0042641	CC	actomyosin	77	9	0.040051	LUAD
GO:0050337	MF	thiosulfate-thiol sulfurtransferase activity	1	1	0.0402676	LUAD
GO:0008219	BP	cell death	2076	110	0.0402796	LUAD
GO:0016358	BP	dendrite development	233	20	0.0403343	LUAD
GO:0140444	MF	cytoskeleton-nuclear membrane anchor activity	5	2	0.0404603	LUAD
GO:0046092	BP	deoxycytidine metabolic process	1	1	0.0405381	LUAD
GO:0033206	BP	meiotic cytokinesis	7	2	0.0407949	LUAD
GO:0046624	MF	sphingolipid transporter activity	18	3	0.0409506	LUAD
GO:0140805	MF	NAD+-protein-serine ADP-ribosyltransferase activity	2	1	0.041026	LUAD
GO:0008556	MF	P-type potassium transmembrane transporter activity	8	2	0.0410607	LUAD
GO:0033561	BP	regulation of water loss via skin	31	4	0.0413403	LUAD
GO:1904762	BP	positive regulation of myofibroblast differentiation	2	1	0.041383	LUAD
GO:0042407	BP	cristae formation	18	3	0.0415224	LUAD
GO:0002460	BP	adaptive immune response based on somatic recombination of immune receptors built from immunoglobulin superfamily domains	285	18	0.0416775	LUAD
GO:0003937	MF	IMP cyclohydrolase activity	1	1	0.0418175	LUAD
GO:0004643	MF	phosphoribosylaminoimidazolecarboxamide formyltransferase activity	1	1	0.0418175	LUAD
GO:0006096	BP	glycolytic process	82	8	0.0420223	LUAD
GO:0038146	BP	chemokine (C-X-C motif) ligand 12 signaling pathway	6	2	0.0422123	LUAD
GO:0030279	BP	negative regulation of ossification	38	5	0.042281	LUAD
GO:0031093	CC	platelet alpha granule lumen	64	6	0.0424696	LUAD
GO:2001169	BP	regulation of ATP biosynthetic process	21	3	0.0426183	LUAD
GO:2000269	BP	regulation of fibroblast apoptotic process	19	3	0.0427995	LUAD
GO:1903523	BP	negative regulation of blood circulation	26	4	0.0428096	LUAD
GO:1902230	BP	negative regulation of intrinsic apoptotic signaling pathway in response to DNA damage	30	4	0.0429146	LUAD
GO:0060897	BP	neural plate regionalization	6	2	0.0429386	LUAD
GO:0072008	BP	glomerular mesangial cell differentiation	6	2	0.0432818	LUAD
GO:0012501	BP	programmed cell death	1918	102	0.043307	LUAD
GO:0031588	CC	nucleotide-activated protein kinase complex	9	2	0.043445	LUAD
GO:0050921	BP	positive regulation of chemotaxis	139	11	0.0434961	LUAD
GO:0005112	MF	Notch binding	23	4	0.0435037	LUAD
GO:1901565	BP	organonitrogen compound catabolic process	1323	69	0.0438639	LUAD
GO:0019724	BP	B cell mediated immunity	136	10	0.0441199	LUAD
GO:0006757	BP	ATP generation from ADP	83	8	0.0444348	LUAD
GO:1902626	BP	assembly of large subunit precursor of preribosome	1	1	0.0445185	LUAD
GO:0030695	MF	GTPase regulator activity	455	32	0.0448526	LUAD
GO:0060589	MF	nucleoside-triphosphatase regulator activity	455	32	0.0448526	LUAD
GO:0009168	BP	purine ribonucleoside monophosphate biosynthetic process	20	3	0.0449706	LUAD
GO:0003179	BP	heart valve morphogenesis	54	7	0.0450304	LUAD
GO:0004747	MF	ribokinase activity	1	1	0.0452947	LUAD
GO:0051315	BP	attachment of mitotic spindle microtubules to kinetochore	21	3	0.045357	LUAD
GO:0031420	MF	alkali metal ion binding	17	3	0.0454691	LUAD
GO:0009950	BP	dorsal/ventral axis specification	12	3	0.0454987	LUAD
GO:0046434	BP	organophosphate catabolic process	159	12	0.045522	LUAD
GO:0006623	BP	protein targeting to vacuole	42	5	0.0456406	LUAD
GO:0030163	BP	protein catabolic process	979	54	0.0457509	LUAD
GO:0035091	MF	phosphatidylinositol binding	266	20	0.0457845	LUAD
GO:0001567	MF	cholesterol 25-hydroxylase activity	1	1	0.045879	LUAD
GO:1903913	BP	regulation of fusion of virus membrane with host plasma membrane	1	1	0.045879	LUAD
GO:1903914	BP	negative regulation of fusion of virus membrane with host plasma membrane	1	1	0.045879	LUAD
GO:0033036	BP	macromolecule localization	2870	145	0.046105	LUAD
GO:0002042	BP	cell migration involved in sprouting angiogenesis	87	7	0.0461364	LUAD
GO:0050853	BP	B cell receptor signaling pathway	58	6	0.0462797	LUAD
GO:0042981	BP	regulation of apoptotic process	1432	78	0.0466847	LUAD
GO:0010958	BP	regulation of amino acid import across plasma membrane	18	3	0.0467091	LUAD
GO:1903789	BP	regulation of amino acid transmembrane transport	18	3	0.0467091	LUAD
GO:0038036	MF	sphingosine-1-phosphate receptor activity	8	2	0.0469151	LUAD
GO:0003222	BP	ventricular trabecula myocardium morphogenesis	14	3	0.047055	LUAD
GO:0070411	MF	I-SMAD binding	14	3	0.0472379	LUAD
GO:0005938	CC	cell cortex	309	24	0.0472642	LUAD
GO:1990713	CC	survivin complex	1	1	0.0473575	LUAD
GO:1903798	BP	regulation of miRNA maturation	25	4	0.0474808	LUAD
GO:1905062	BP	positive regulation of cardioblast proliferation	1	1	0.047729	LUAD
GO:1903568	BP	negative regulation of protein localization to ciliary membrane	1	1	0.0477797	LUAD
GO:1902075	BP	cellular response to salt	7	2	0.048098	LUAD
GO:0002192	BP	IRES-dependent translational initiation of linear mRNA	1	1	0.0481508	LUAD
GO:0110017	BP	cap-independent translational initiation of linear mRNA	1	1	0.0481508	LUAD
GO:0030017	CC	sarcomere	210	16	0.0481508	LUAD
GO:1905476	BP	negative regulation of protein localization to membrane	32	4	0.0482656	LUAD
GO:0032956	BP	regulation of actin cytoskeleton organization	354	25	0.0483778	LUAD
GO:0060854	BP	branching involved in lymph vessel morphogenesis	1	1	0.048392	LUAD
GO:0003279	BP	cardiac septum development	107	11	0.0484744	LUAD
GO:0051345	BP	positive regulation of hydrolase activity	561	35	0.0486534	LUAD
GO:0034154	BP	toll-like receptor 7 signaling pathway	12	2	0.0486676	LUAD
GO:0060957	BP	endocardial cell fate commitment	1	1	0.0488446	LUAD
GO:0061445	BP	endocardial cushion cell fate commitment	1	1	0.0488446	LUAD
GO:0009117	BP	nucleotide metabolic process	571	32	0.0488754	LUAD
GO:0072143	BP	mesangial cell development	6	2	0.0489166	LUAD
GO:0050251	MF	retinol isomerase activity	2	1	0.0489366	LUAD
GO:0014009	BP	glial cell proliferation	52	6	0.0490258	LUAD
GO:0003348	BP	cardiac endothelial cell differentiation	6	2	0.0492824	LUAD
GO:0060956	BP	endocardial cell differentiation	6	2	0.0492824	LUAD
GO:0019199	MF	transmembrane receptor protein kinase activity	78	9	0.0493004	LUAD
GO:0070540	MF	stearic acid binding	1	1	0.0493425	LUAD
GO:0010248	BP	establishment or maintenance of transmembrane electrochemical gradient	11	2	0.0494082	LUAD
GO:0035239	BP	tube morphogenesis	924	57	0.0495991	LUAD
GO:0030809	BP	negative regulation of nucleotide biosynthetic process	8	2	0.0496407	LUAD
GO:1900372	BP	negative regulation of purine nucleotide biosynthetic process	8	2	0.0496407	LUAD
GO:0050729	BP	positive regulation of inflammatory response	151	10	0.0496881	LUAD
GO:0071001	CC	U4/U6 snRNP	2	1	0.0498189	LUAD
GO:0019320	BP	hexose catabolic process	42	5	0.0498884	LUAD
GO:0001666	BP	response to hypoxia	290	21	0.049898	LUAD

## Sheet: LUSC
ID	ONTOLOGY	TERM	N	DE	P.DE	Cancer
GO:0005096	MF	GTPase activator activity	248	16	6.82115e-05	LUSC
GO:0008047	MF	enzyme activator activity	524	23	0.00011246	LUSC
GO:0050790	BP	regulation of catalytic activity	2267	63	0.000328569	LUSC
GO:2001271	BP	negative regulation of cysteine-type endopeptidase activity involved in execution phase of apoptosis	3	2	0.0003935	LUSC
GO:0032289	BP	central nervous system myelin formation	6	3	0.000477562	LUSC
GO:0008253	MF	5'-nucleotidase activity	12	3	0.000573373	LUSC
GO:0008252	MF	nucleotidase activity	14	3	0.000813155	LUSC
GO:0007595	BP	lactation	40	5	0.00108069	LUSC
GO:0030220	BP	platelet formation	20	4	0.00113326	LUSC
GO:0042635	BP	positive regulation of hair cycle	2	2	0.00121851	LUSC
GO:0036344	BP	platelet morphogenesis	22	4	0.00132963	LUSC
GO:0030695	MF	GTPase regulator activity	456	20	0.00184876	LUSC
GO:0060589	MF	nucleoside-triphosphatase regulator activity	456	20	0.00184876	LUSC
GO:2001270	BP	regulation of cysteine-type endopeptidase activity involved in execution phase of apoptosis	5	2	0.00241027	LUSC
GO:0050665	BP	hydrogen peroxide biosynthetic process	16	3	0.00260098	LUSC
GO:0030234	MF	enzyme regulator activity	1183	35	0.0028689	LUSC
GO:0007023	BP	post-chaperonin tubulin folding pathway	5	2	0.0030551	LUSC
GO:0060759	BP	regulation of response to cytokine stimulus	172	8	0.00344802	LUSC
GO:0045931	BP	positive regulation of mitotic cell cycle	128	8	0.00387549	LUSC
GO:0001913	BP	T cell mediated cytotoxicity	47	4	0.00415254	LUSC
GO:0001909	BP	leukocyte mediated cytotoxicity	121	6	0.00489592	LUSC
GO:0070997	BP	neuron death	364	15	0.00508794	LUSC
GO:0032634	BP	interleukin-5 production	18	3	0.00523479	LUSC
GO:0032674	BP	regulation of interleukin-5 production	18	3	0.00523479	LUSC
GO:0050786	MF	RAGE receptor binding	9	2	0.00529905	LUSC
GO:0007021	BP	tubulin complex assembly	8	2	0.00545499	LUSC
GO:0030228	MF	lipoprotein particle receptor activity	18	3	0.00559256	LUSC
GO:1900118	BP	negative regulation of execution phase of apoptosis	8	2	0.00567624	LUSC
GO:0065009	BP	regulation of molecular function	2986	72	0.0057459	LUSC
GO:0002252	BP	immune effector process	584	18	0.00593476	LUSC
GO:0032911	BP	negative regulation of transforming growth factor beta1 production	6	2	0.00620217	LUSC
GO:0042743	BP	hydrogen peroxide metabolic process	53	4	0.00641575	LUSC
GO:1903799	BP	negative regulation of miRNA maturation	15	3	0.00648295	LUSC
GO:0007589	BP	body fluid secretion	85	6	0.00659808	LUSC
GO:0042017	MF	interleukin-22 binding	1	1	0.00684452	LUSC
GO:0042018	MF	interleukin-22 receptor activity	1	1	0.00684452	LUSC
GO:0016268	BP	O-glycan processing, core 2	1	1	0.00734531	LUSC
GO:0010728	BP	regulation of hydrogen peroxide biosynthetic process	7	2	0.00737097	LUSC
GO:0031257	CC	cell trailing edge membrane	1	1	0.00738027	LUSC
GO:0031259	CC	uropod membrane	1	1	0.00738027	LUSC
GO:0038123	BP	toll-like receptor TLR1:TLR2 signaling pathway	1	1	0.00738027	LUSC
GO:0043394	MF	proteoglycan binding	36	4	0.00740157	LUSC
GO:0032616	BP	interleukin-13 production	20	3	0.00809627	LUSC
GO:0032656	BP	regulation of interleukin-13 production	20	3	0.00809627	LUSC
GO:0010920	BP	negative regulation of inositol phosphate biosynthetic process	1	1	0.00818824	LUSC
GO:0010924	BP	regulation of inositol-polyphosphate 5-phosphatase activity	1	1	0.00818824	LUSC
GO:0010925	BP	positive regulation of inositol-polyphosphate 5-phosphatase activity	1	1	0.00818824	LUSC
GO:0030845	BP	phospholipase C-inhibiting G protein-coupled receptor signaling pathway	1	1	0.00818824	LUSC
GO:0060305	BP	regulation of cell diameter	1	1	0.00818824	LUSC
GO:0051716	BP	cellular response to stimulus	7082	143	0.00823619	LUSC
GO:1902895	BP	positive regulation of miRNA transcription	47	5	0.00824717	LUSC
GO:0043395	MF	heparan sulfate proteoglycan binding	18	3	0.00843231	LUSC
GO:0098772	MF	molecular function regulator activity	1866	46	0.00904056	LUSC
GO:0051336	BP	regulation of hydrolase activity	973	28	0.009082	LUSC
GO:0005102	MF	signaling receptor binding	1399	37	0.00913374	LUSC
GO:0001959	BP	regulation of cytokine-mediated signaling pathway	161	7	0.00918906	LUSC
GO:0002505	BP	antigen processing and presentation of polysaccharide antigen via MHC class II	1	1	0.009202	LUSC
GO:0002747	BP	antigen processing and presentation following phagocytosis	1	1	0.009202	LUSC
GO:0046754	BP	viral exocytosis	1	1	0.009202	LUSC
GO:0008785	MF	alkyl hydroperoxide reductase activity	1	1	0.00958518	LUSC
GO:0005001	MF	transmembrane receptor protein tyrosine phosphatase activity	17	3	0.00996674	LUSC
GO:0019198	MF	transmembrane receptor protein phosphatase activity	17	3	0.00996674	LUSC
GO:0002154	BP	thyroid hormone mediated signaling pathway	8	2	0.00998906	LUSC
GO:0043524	BP	negative regulation of neuron apoptotic process	153	8	0.0100152	LUSC
GO:0007165	BP	signal transduction	5614	118	0.0102507	LUSC
GO:1905115	BP	regulation of lateral attachment of mitotic spindle microtubules to kinetochore	1	1	0.0103101	LUSC
GO:1905116	BP	positive regulation of lateral attachment of mitotic spindle microtubules to kinetochore	1	1	0.0103101	LUSC
GO:0006909	BP	phagocytosis	236	10	0.0103639	LUSC
GO:0043123	BP	positive regulation of I-kappaB kinase/NF-kappaB signaling	187	8	0.0104128	LUSC
GO:0004397	MF	histidine ammonia-lyase activity	1	1	0.0108953	LUSC
GO:0046939	BP	nucleotide phosphorylation	101	6	0.0108971	LUSC
GO:0003937	MF	IMP cyclohydrolase activity	1	1	0.0110075	LUSC
GO:0004643	MF	phosphoribosylaminoimidazolecarboxamide formyltransferase activity	1	1	0.0110075	LUSC
GO:0070878	MF	primary miRNA binding	10	2	0.0110302	LUSC
GO:0051402	BP	neuron apoptotic process	253	11	0.0112978	LUSC
GO:0050878	BP	regulation of body fluid levels	380	14	0.011599	LUSC
GO:0050337	MF	thiosulfate-thiol sulfurtransferase activity	1	1	0.0117703	LUSC
GO:0003714	MF	transcription corepressor activity	183	9	0.0117918	LUSC
GO:0008064	BP	regulation of actin polymerization or depolymerization	154	8	0.0118712	LUSC
GO:0016363	CC	nuclear matrix	125	7	0.0121291	LUSC
GO:0042974	MF	nuclear retinoic acid receptor binding	24	3	0.0122871	LUSC
GO:0030155	BP	regulation of cell adhesion	780	25	0.0126991	LUSC
GO:0007162	BP	negative regulation of cell adhesion	298	12	0.0127584	LUSC
GO:0030832	BP	regulation of actin filament length	157	8	0.012973	LUSC
GO:0071610	BP	chemokine (C-C motif) ligand 1 production	1	1	0.0130618	LUSC
GO:0071652	BP	regulation of chemokine (C-C motif) ligand 1 production	1	1	0.0130618	LUSC
GO:0071654	BP	positive regulation of chemokine (C-C motif) ligand 1 production	1	1	0.0130618	LUSC
GO:0071233	BP	cellular response to leucine	10	2	0.0132811	LUSC
GO:0060965	BP	negative regulation of miRNA-mediated gene silencing	21	3	0.0134204	LUSC
GO:2000630	BP	positive regulation of miRNA metabolic process	56	5	0.0134505	LUSC
GO:0030215	MF	semaphorin receptor binding	23	3	0.0136245	LUSC
GO:0031581	BP	hemidesmosome assembly	6	2	0.0137171	LUSC
GO:0035855	BP	megakaryocyte development	22	3	0.0138647	LUSC
GO:2000471	BP	regulation of hematopoietic stem cell migration	2	1	0.0141468	LUSC
GO:2000473	BP	positive regulation of hematopoietic stem cell migration	2	1	0.0141468	LUSC
GO:0043376	BP	regulation of CD8-positive, alpha-beta T cell differentiation	7	2	0.0141847	LUSC
GO:0004352	MF	glutamate dehydrogenase (NAD+) activity	2	1	0.0141928	LUSC
GO:0004353	MF	glutamate dehydrogenase [NAD(P)+] activity	2	1	0.0141928	LUSC
GO:0004354	MF	glutamate dehydrogenase (NADP+) activity	2	1	0.0141928	LUSC
GO:0016639	MF	oxidoreductase activity, acting on the CH-NH2 group of donors, NAD or NADP as acceptor	2	1	0.0141928	LUSC
GO:0001604	MF	urotensin II receptor activity	2	1	0.0145743	LUSC
GO:0002228	BP	natural killer cell mediated immunity	70	4	0.0148005	LUSC
GO:0060964	BP	regulation of miRNA-mediated gene silencing	43	4	0.0149291	LUSC
GO:0014003	BP	oligodendrocyte development	43	4	0.0149798	LUSC
GO:0044194	CC	cytolytic granule	13	2	0.0151695	LUSC
GO:0060149	BP	negative regulation of post-transcriptional gene silencing	22	3	0.0152851	LUSC
GO:0060967	BP	negative regulation of gene silencing by RNA	22	3	0.0152851	LUSC
GO:1900369	BP	negative regulation of post-transcriptional gene silencing by RNA	22	3	0.0152851	LUSC
GO:0007166	BP	cell surface receptor signaling pathway	2681	65	0.0153279	LUSC
GO:0042326	BP	negative regulation of phosphorylation	370	14	0.0157819	LUSC
GO:0030374	MF	nuclear receptor coactivator activity	56	4	0.015805	LUSC
GO:0022010	BP	central nervous system myelination	24	3	0.0160014	LUSC
GO:0032291	BP	axon ensheathment in central nervous system	24	3	0.0160014	LUSC
GO:0050251	MF	retinol isomerase activity	2	1	0.0162889	LUSC
GO:1900087	BP	positive regulation of G1/S transition of mitotic cell cycle	54	4	0.0164291	LUSC
GO:0001906	BP	cell killing	166	6	0.0164919	LUSC
GO:0032755	BP	positive regulation of interleukin-6 production	98	5	0.0165228	LUSC
GO:0071635	BP	negative regulation of transforming growth factor beta production	11	2	0.0166549	LUSC
GO:0051156	BP	glucose 6-phosphate metabolic process	27	3	0.0166915	LUSC
GO:1900368	BP	regulation of post-transcriptional gene silencing by RNA	45	4	0.0167408	LUSC
GO:0050896	BP	response to stimulus	8382	161	0.0168181	LUSC
GO:0033673	BP	negative regulation of kinase activity	232	10	0.0170887	LUSC
GO:0060147	BP	regulation of post-transcriptional gene silencing	46	4	0.0171544	LUSC
GO:0007155	BP	cell adhesion	1496	41	0.0172255	LUSC
GO:0042130	BP	negative regulation of T cell proliferation	66	4	0.0173301	LUSC
GO:0030056	CC	hemidesmosome	7	2	0.0174287	LUSC
GO:0032288	BP	myelin assembly	22	3	0.0176045	LUSC
GO:1903409	BP	reactive oxygen species biosynthetic process	59	4	0.0180595	LUSC
GO:0032908	BP	regulation of transforming growth factor beta1 production	12	2	0.0183112	LUSC
GO:0060966	BP	regulation of gene silencing by RNA	48	4	0.0183779	LUSC
GO:2000116	BP	regulation of cysteine-type endopeptidase activity	229	9	0.0184592	LUSC
GO:0002460	BP	adaptive immune response based on somatic recombination of immune receptors built from immunoglobulin superfamily domains	285	10	0.0193116	LUSC
GO:0098760	BP	response to interleukin-7	14	2	0.019504	LUSC
GO:0098761	BP	cellular response to interleukin-7	14	2	0.019504	LUSC
GO:0032535	BP	regulation of cellular component size	360	14	0.0195043	LUSC
GO:1902893	BP	regulation of miRNA transcription	61	5	0.0195365	LUSC
GO:1901215	BP	negative regulation of neuron death	215	9	0.0195695	LUSC
GO:0004726	MF	non-membrane spanning protein tyrosine phosphatase activity	12	2	0.0196632	LUSC
GO:0050146	MF	nucleoside phosphotransferase activity	1	1	0.019689	LUSC
GO:0050484	MF	GMP 5'-nucleotidase activity	1	1	0.019689	LUSC
GO:0043014	MF	alpha-tubulin binding	37	3	0.0199812	LUSC
GO:0004815	MF	aspartate-tRNA ligase activity	2	1	0.0200027	LUSC
GO:0006422	BP	aspartyl-tRNA aminoacylation	2	1	0.0200027	LUSC
GO:0061614	BP	miRNA transcription	62	5	0.0200874	LUSC
GO:0062073	CC	histone mRNA stem-loop binding complex	2	1	0.0201116	LUSC
GO:0045787	BP	positive regulation of cell cycle	336	12	0.0201221	LUSC
GO:0002756	BP	MyD88-independent toll-like receptor signaling pathway	14	2	0.0201308	LUSC
GO:0003093	BP	regulation of glomerular filtration	9	2	0.0202198	LUSC
GO:0060219	BP	camera-type eye photoreceptor cell differentiation	29	3	0.0202954	LUSC
GO:1903798	BP	regulation of miRNA maturation	25	3	0.0203968	LUSC
GO:0018158	BP	protein oxidation	13	2	0.0204324	LUSC
GO:0006968	BP	cellular defense response	48	3	0.0205948	LUSC
GO:0045936	BP	negative regulation of phosphate metabolic process	427	15	0.020786	LUSC
GO:0051345	BP	positive regulation of hydrolase activity	562	18	0.0209722	LUSC
GO:0010563	BP	negative regulation of phosphorus metabolic process	428	15	0.0210653	LUSC
GO:0002433	BP	immune response-regulating cell surface receptor signaling pathway involved in phagocytosis	26	3	0.0213387	LUSC
GO:0038096	BP	Fc-gamma receptor signaling pathway involved in phagocytosis	26	3	0.0213387	LUSC
GO:0071207	MF	histone pre-mRNA stem-loop binding	2	1	0.0215397	LUSC
GO:0051233	CC	spindle midzone	35	3	0.0215828	LUSC
GO:0070920	BP	regulation of production of small RNA involved in gene silencing by RNA	27	3	0.0218241	LUSC
GO:0010941	BP	regulation of cell death	1617	40	0.021949	LUSC
GO:0006096	BP	glycolytic process	82	5	0.0219855	LUSC
GO:0005667	CC	transcription regulator complex	491	17	0.02232	LUSC
GO:0052547	BP	regulation of peptidase activity	436	13	0.0223308	LUSC
GO:0006757	BP	ATP generation from ADP	83	5	0.022905	LUSC
GO:0031638	BP	zymogen activation	66	4	0.0229977	LUSC
GO:0044335	BP	canonical Wnt signaling pathway involved in neural crest cell differentiation	2	1	0.0230583	LUSC
GO:0043122	BP	regulation of I-kappaB kinase/NF-kappaB signaling	251	9	0.0230616	LUSC
GO:0002449	BP	lymphocyte mediated immunity	271	9	0.0231518	LUSC
GO:2000815	BP	regulation of mRNA stability involved in response to oxidative stress	2	1	0.0231791	LUSC
GO:0042492	BP	gamma-delta T cell differentiation	13	2	0.0232195	LUSC
GO:0002456	BP	T cell mediated immunity	104	5	0.0233417	LUSC
GO:0034399	CC	nuclear periphery	144	7	0.0233646	LUSC
GO:0002443	BP	leukocyte mediated immunity	366	11	0.023531	LUSC
GO:1901214	BP	regulation of neuron death	322	12	0.0237041	LUSC
GO:0005139	MF	interleukin-7 receptor binding	2	1	0.0238605	LUSC
GO:0071142	CC	homomeric SMAD protein complex	2	1	0.0238899	LUSC
GO:0003829	MF	beta-1,3-galactosyl-O-glycosyl-glycoprotein beta-1,6-N-acetylglucosaminyltransferase activity	3	1	0.0241721	LUSC
GO:0006624	BP	vacuolar protein processing	2	1	0.0242289	LUSC
GO:0030834	BP	regulation of actin filament depolymerization	52	4	0.0242677	LUSC
GO:0043201	BP	response to leucine	14	2	0.0243363	LUSC
GO:0110053	BP	regulation of actin filament organization	269	11	0.0249277	LUSC
GO:0005760	CC	gamma DNA polymerase complex	2	1	0.0250931	LUSC
GO:0001991	BP	regulation of systemic arterial blood pressure by circulatory renin-angiotensin	17	2	0.0251676	LUSC
GO:0032754	BP	positive regulation of interleukin-5 production	10	2	0.0253472	LUSC
GO:0099607	BP	lateral attachment of mitotic spindle microtubules to kinetochore	2	1	0.0254872	LUSC
GO:0046452	BP	dihydrofolate metabolic process	3	1	0.0255135	LUSC
GO:0009125	BP	nucleoside monophosphate catabolic process	18	2	0.0255284	LUSC
GO:0070493	BP	thrombin-activated receptor signaling pathway	12	2	0.0257109	LUSC
GO:0045444	BP	fat cell differentiation	240	10	0.0258651	LUSC
GO:0046040	BP	IMP metabolic process	17	2	0.0263011	LUSC
GO:0044093	BP	positive regulation of molecular function	1525	39	0.0264775	LUSC
GO:0032905	BP	transforming growth factor beta1 production	15	2	0.0266542	LUSC
GO:0007015	BP	actin filament organization	442	16	0.0267282	LUSC
GO:0097396	BP	response to interleukin-17	15	2	0.0270637	LUSC
GO:0097398	BP	cellular response to interleukin-17	15	2	0.0270637	LUSC
GO:0072659	BP	protein localization to plasma membrane	281	11	0.0271877	LUSC
GO:0009295	CC	nucleoid	45	3	0.0271907	LUSC
GO:0042645	CC	mitochondrial nucleoid	45	3	0.0271907	LUSC
GO:0043523	BP	regulation of neuron apoptotic process	217	9	0.0272214	LUSC
GO:0018171	BP	peptidyl-cysteine oxidation	3	1	0.0272641	LUSC
GO:0008219	BP	cell death	2078	49	0.0272953	LUSC
GO:2001236	BP	regulation of extrinsic apoptotic signaling pathway	154	7	0.0273336	LUSC
GO:0010310	BP	regulation of hydrogen peroxide metabolic process	18	2	0.0275818	LUSC
GO:0001977	BP	renal system process involved in regulation of blood volume	14	2	0.0276169	LUSC
GO:0097709	BP	connective tissue replacement	19	2	0.0276684	LUSC
GO:0071229	BP	cellular response to acid chemical	84	5	0.0278836	LUSC
GO:0060761	BP	negative regulation of response to cytokine stimulus	89	4	0.0280278	LUSC
GO:0042629	CC	mast cell granule	3	1	0.0283057	LUSC
GO:0090472	BP	dibasic protein processing	1	1	0.0284069	LUSC
GO:1901392	BP	regulation of transforming growth factor beta1 activation	1	1	0.0284069	LUSC
GO:1901394	BP	positive regulation of transforming growth factor beta1 activation	1	1	0.0284069	LUSC
GO:0002162	MF	dystroglycan binding	11	2	0.0284122	LUSC
GO:0033691	MF	sialic acid binding	22	2	0.0284531	LUSC
GO:0010675	BP	regulation of cellular carbohydrate metabolic process	150	7	0.0286604	LUSC
GO:0052548	BP	regulation of endopeptidase activity	406	12	0.0287054	LUSC
GO:0035729	BP	cellular response to hepatocyte growth factor stimulus	17	2	0.028742	LUSC
GO:0031370	MF	eukaryotic initiation factor 4G binding	1	1	0.0287938	LUSC
GO:0017168	MF	5-oxoprolinase (ATP-hydrolyzing) activity	1	1	0.0290021	LUSC
GO:0035196	BP	miRNA processing	56	4	0.0291948	LUSC
GO:1902808	BP	positive regulation of cell cycle G1/S phase transition	66	4	0.0292999	LUSC
GO:0051431	MF	corticotropin-releasing hormone receptor 2 binding	3	1	0.0294244	LUSC
GO:0031053	BP	primary miRNA processing	16	2	0.0294386	LUSC
GO:0030836	BP	positive regulation of actin filament depolymerization	12	2	0.0294775	LUSC
GO:1990023	CC	mitotic spindle midzone	13	2	0.0296595	LUSC
GO:0043531	MF	ADP binding	34	3	0.03022	LUSC
GO:0070442	CC	integrin alphaIIb-beta3 complex	1	1	0.0302353	LUSC
GO:1900134	BP	negative regulation of renin secretion into blood stream	1	1	0.0304132	LUSC
GO:0032635	BP	interleukin-6 production	169	6	0.0306447	LUSC
GO:0032675	BP	regulation of interleukin-6 production	169	6	0.0306447	LUSC
GO:0097453	CC	mesaxon	1	1	0.0307972	LUSC
GO:1990015	CC	ensheathing process	1	1	0.0307972	LUSC
GO:2000628	BP	regulation of miRNA metabolic process	74	5	0.0308807	LUSC
GO:0007259	BP	receptor signaling pathway via JAK-STAT	151	6	0.0309215	LUSC
GO:0016810	MF	hydrolase activity, acting on carbon-nitrogen (but not peptide) bonds	126	5	0.0310342	LUSC
GO:0043112	BP	receptor metabolic process	60	4	0.0310409	LUSC
GO:1903435	BP	positive regulation of constitutive secretory pathway	1	1	0.0310935	LUSC
GO:0034972	BP	histone H3-R26 methylation	1	1	0.0311176	LUSC
GO:0060817	BP	inactivation of paternal X chromosome	1	1	0.0311176	LUSC
GO:0099173	BP	postsynapse organization	161	8	0.0312074	LUSC
GO:0046031	BP	ADP metabolic process	91	5	0.031428	LUSC
GO:0071526	BP	semaphorin-plexin signaling pathway	44	4	0.0314842	LUSC
GO:0045820	BP	negative regulation of glycolytic process	14	2	0.03152	LUSC
GO:1901860	BP	positive regulation of mitochondrial DNA metabolic process	4	1	0.031697	LUSC
GO:0048709	BP	oligodendrocyte differentiation	100	6	0.0318086	LUSC
GO:0070918	BP	small regulatory ncRNA processing	60	4	0.0318397	LUSC
GO:1900117	BP	regulation of execution phase of apoptosis	16	2	0.0318761	LUSC
GO:0051348	BP	negative regulation of transferase activity	266	10	0.0320465	LUSC
GO:0002695	BP	negative regulation of leukocyte activation	192	7	0.0322883	LUSC
GO:0038094	BP	Fc-gamma receptor signaling pathway	32	3	0.0322912	LUSC
GO:0006933	BP	negative regulation of cell adhesion involved in substrate-bound cell migration	4	1	0.0322975	LUSC
GO:0051141	BP	negative regulation of NK T cell proliferation	1	1	0.0323157	LUSC
GO:0030101	BP	natural killer cell activation	78	4	0.0323158	LUSC
GO:0035259	MF	nuclear glucocorticoid receptor binding	13	2	0.0324645	LUSC
GO:0002431	BP	Fc receptor mediated stimulatory signaling pathway	33	3	0.032477	LUSC
GO:0016638	MF	oxidoreductase activity, acting on the CH-NH2 group of donors	20	2	0.0325232	LUSC
GO:0097067	BP	cellular response to thyroid hormone stimulus	18	2	0.0325465	LUSC
GO:0043027	MF	cysteine-type endopeptidase inhibitor activity involved in apoptotic process	21	2	0.033165	LUSC
GO:0071226	BP	cellular response to molecule of fungal origin	4	1	0.0332763	LUSC
GO:0051056	BP	regulation of small GTPase mediated signal transduction	294	12	0.033335	LUSC
GO:1904863	BP	regulation of beta-catenin-TCF complex assembly	2	1	0.0343195	LUSC
GO:1904864	BP	negative regulation of beta-catenin-TCF complex assembly	2	1	0.0343195	LUSC
GO:0044855	BP	plasma membrane raft distribution	2	1	0.034426	LUSC
GO:0044856	BP	plasma membrane raft localization	2	1	0.034426	LUSC
GO:1903578	BP	regulation of ATP metabolic process	71	4	0.034797	LUSC
GO:0031262	CC	Ndc80 complex	4	1	0.0349689	LUSC
GO:0048306	MF	calcium-dependent protein binding	77	4	0.0351561	LUSC
GO:0030042	BP	actin filament depolymerization	57	4	0.0353306	LUSC
GO:0023052	BP	signaling	6106	124	0.0353867	LUSC
GO:0035728	BP	response to hepatocyte growth factor	19	2	0.0353931	LUSC
GO:0005041	MF	low-density lipoprotein particle receptor activity	15	2	0.0359368	LUSC
GO:0098742	BP	cell-cell adhesion via plasma-membrane adhesion molecules	274	10	0.0359673	LUSC
GO:0043154	BP	negative regulation of cysteine-type endopeptidase activity involved in apoptotic process	76	4	0.0360593	LUSC
GO:0002250	BP	adaptive immune response	416	12	0.0361729	LUSC
GO:0033277	BP	abortive mitotic cell cycle	2	1	0.0362249	LUSC
GO:0036145	BP	dendritic cell homeostasis	2	1	0.0362663	LUSC
GO:0006165	BP	nucleoside diphosphate phosphorylation	99	5	0.0364181	LUSC
GO:0090630	BP	activation of GTPase activity	105	6	0.0365352	LUSC
GO:1901992	BP	positive regulation of mitotic cell cycle phase transition	99	5	0.0367486	LUSC
GO:0002923	BP	regulation of humoral immune response mediated by circulating immunoglobulin	19	2	0.0368465	LUSC
GO:0048487	MF	beta-tubulin binding	40	3	0.036948	LUSC
GO:0042359	BP	vitamin D metabolic process	20	2	0.0371217	LUSC
GO:0006739	BP	NADP metabolic process	42	3	0.0375968	LUSC
GO:0016333	BP	morphogenesis of follicular epithelium	1	1	0.0380988	LUSC
GO:0016334	BP	establishment or maintenance of polarity of follicular epithelium	1	1	0.0380988	LUSC
GO:0042247	BP	establishment of planar polarity of follicular epithelium	1	1	0.0380988	LUSC
GO:0002720	BP	positive regulation of cytokine production involved in immune response	77	4	0.0381484	LUSC
GO:2000045	BP	regulation of G1/S transition of mitotic cell cycle	183	7	0.0382295	LUSC
GO:0050868	BP	negative regulation of T cell activation	122	5	0.0383548	LUSC
GO:0002429	BP	immune response-activating cell surface receptor signaling pathway	225	8	0.0384348	LUSC
GO:0002757	BP	immune response-activating signal transduction	225	8	0.0384348	LUSC
GO:0046965	MF	nuclear retinoid X receptor binding	15	2	0.0384536	LUSC
GO:0004344	MF	glucose dehydrogenase activity	1	1	0.0385409	LUSC
GO:0047934	MF	glucose 1-dehydrogenase (NAD+) activity	1	1	0.0385409	LUSC
GO:0047935	MF	glucose 1-dehydrogenase (NADP+) activity	1	1	0.0385409	LUSC
GO:0047936	MF	glucose 1-dehydrogenase [NAD(P)] activity	1	1	0.0385409	LUSC
GO:0072538	BP	T-helper 17 type immune response	43	3	0.0385938	LUSC
GO:0009692	BP	ethylene metabolic process	1	1	0.0386547	LUSC
GO:0016711	MF	flavonoid 3'-monooxygenase activity	1	1	0.0386547	LUSC
GO:0017143	BP	insecticide metabolic process	1	1	0.0386547	LUSC
GO:0019341	BP	dibenzo-p-dioxin catabolic process	1	1	0.0386547	LUSC
GO:0097696	BP	receptor signaling pathway via STAT	161	6	0.0390916	LUSC
GO:1903433	BP	regulation of constitutive secretory pathway	2	1	0.0395478	LUSC
GO:0050483	MF	IMP 5'-nucleotidase activity	3	1	0.0401982	LUSC
GO:0051134	BP	negative regulation of NK T cell activation	2	1	0.0404579	LUSC
GO:0032042	BP	mitochondrial DNA metabolic process	23	2	0.0405557	LUSC
GO:0002102	CC	podosome	30	3	0.0409452	LUSC
GO:0001819	BP	positive regulation of cytokine production	476	13	0.0411029	LUSC
GO:0140506	MF	endoplasmic reticulum-autophagosome adaptor activity	3	1	0.0411821	LUSC
GO:0004910	MF	interleukin-1, type II, blocking receptor activity	2	1	0.0412405	LUSC
GO:0043374	BP	CD8-positive, alpha-beta T cell differentiation	14	2	0.0412857	LUSC
GO:0046034	BP	ATP metabolic process	205	7	0.0413299	LUSC
GO:0002238	BP	response to molecule of fungal origin	5	1	0.0413455	LUSC
GO:0006955	BP	immune response	1539	32	0.0413873	LUSC
GO:0050672	BP	negative regulation of lymphocyte proliferation	83	4	0.0414109	LUSC
GO:0002823	BP	negative regulation of adaptive immune response based on somatic recombination of immune receptors built from immunoglobulin superfamily domains	54	3	0.0414503	LUSC
GO:0032736	BP	positive regulation of interleukin-13 production	14	2	0.0414827	LUSC
GO:0016841	MF	ammonia-lyase activity	5	1	0.0415769	LUSC
GO:0047931	MF	glucosamine kinase activity	1	1	0.0416887	LUSC
GO:0099189	CC	postsynaptic spectrin-associated cytoskeleton	1	1	0.0417713	LUSC
GO:0010677	BP	negative regulation of cellular carbohydrate metabolic process	44	3	0.0418041	LUSC
GO:0007529	BP	establishment of synaptic specificity at neuromuscular junction	2	1	0.0418449	LUSC
GO:0014909	BP	smooth muscle cell migration	94	5	0.0420176	LUSC
GO:1990134	BP	epithelial cell apoptotic process involved in palatal shelf morphogenesis	1	1	0.0420528	LUSC
GO:0042284	MF	sphingolipid delta-4 desaturase activity	2	1	0.042123	LUSC
GO:0021782	BP	glial cell development	117	6	0.042131	LUSC
GO:0030901	BP	midbrain development	90	5	0.0421452	LUSC
GO:0016922	MF	nuclear receptor binding	138	6	0.0421531	LUSC
GO:0032945	BP	negative regulation of mononuclear cell proliferation	84	4	0.0422204	LUSC
GO:2001029	BP	regulation of cellular glucuronidation	1	1	0.0423009	LUSC
GO:2001031	BP	positive regulation of cellular glucuronidation	1	1	0.0423009	LUSC
GO:0034333	BP	adherens junction assembly	13	2	0.0424277	LUSC
GO:2000640	BP	positive regulation of SREBP signaling pathway	2	1	0.0424292	LUSC
GO:0019556	BP	histidine catabolic process to glutamate and formamide	4	1	0.0424604	LUSC
GO:0019557	BP	histidine catabolic process to glutamate and formate	4	1	0.0424604	LUSC
GO:0043606	BP	formamide metabolic process	4	1	0.0424604	LUSC
GO:0051250	BP	negative regulation of lymphocyte activation	160	6	0.0428084	LUSC
GO:0002376	BP	immune system process	2446	51	0.0429836	LUSC
GO:0000304	BP	response to singlet oxygen	1	1	0.0433249	LUSC
GO:0048619	BP	embryonic hindgut morphogenesis	3	1	0.0435226	LUSC
GO:1990131	CC	Gtr1-Gtr2 GTPase complex	4	1	0.0435799	LUSC
GO:0002037	BP	negative regulation of L-glutamate import across plasma membrane	2	1	0.0436335	LUSC
GO:0060060	BP	post-embryonic retina morphogenesis in camera-type eye	2	1	0.0436619	LUSC
GO:0030886	BP	negative regulation of myeloid dendritic cell activation	3	1	0.0441083	LUSC
GO:0009162	BP	deoxyribonucleoside monophosphate metabolic process	24	2	0.0441544	LUSC
GO:0008154	BP	actin polymerization or depolymerization	195	8	0.0441555	LUSC
GO:0050872	BP	white fat cell differentiation	16	2	0.0442647	LUSC
GO:0007154	BP	cell communication	6166	124	0.0444406	LUSC
GO:0002702	BP	positive regulation of production of molecular mediator of immune response	129	5	0.0445452	LUSC
GO:0045887	BP	positive regulation of synaptic assembly at neuromuscular junction	1	1	0.0447765	LUSC
GO:2001185	BP	regulation of CD8-positive, alpha-beta T cell activation	18	2	0.0448064	LUSC
GO:0007249	BP	I-kappaB kinase/NF-kappaB signaling	283	9	0.0448402	LUSC
GO:0006952	BP	defense response	1614	32	0.0448583	LUSC
GO:1903618	BP	regulation of transdifferentiation	1	1	0.0448709	LUSC
GO:1903620	BP	positive regulation of transdifferentiation	1	1	0.0448709	LUSC
GO:0016964	MF	alpha-2 macroglobulin receptor activity	1	1	0.0450169	LUSC
GO:0006090	BP	pyruvate metabolic process	107	5	0.0451499	LUSC
GO:0070560	BP	protein secretion by platelet	2	1	0.0455144	LUSC
GO:0070889	BP	platelet alpha granule organization	2	1	0.0456473	LUSC
GO:2000689	BP	actomyosin contractile ring assembly actin filament organization	1	1	0.0457096	LUSC
GO:1903615	BP	positive regulation of protein tyrosine phosphatase activity	3	1	0.045868	LUSC
GO:0032402	BP	melanosome transport	22	2	0.0459244	LUSC
GO:0048156	MF	tau protein binding	43	3	0.0465875	LUSC
GO:0071208	MF	histone pre-mRNA DCP binding	4	1	0.0474414	LUSC
GO:0030301	BP	cholesterol transport	119	5	0.0474431	LUSC
GO:1905451	BP	positive regulation of Fc-gamma receptor signaling pathway involved in phagocytosis	3	1	0.0474675	LUSC
GO:0002046	MF	opsin binding	5	1	0.0478261	LUSC
GO:0031094	CC	platelet dense tubular network	11	2	0.0478313	LUSC
GO:0060766	BP	negative regulation of androgen receptor signaling pathway	15	2	0.0479944	LUSC
GO:1903426	BP	regulation of reactive oxygen species biosynthetic process	47	3	0.048006	LUSC
GO:0043067	BP	regulation of programmed cell death	1467	35	0.0482574	LUSC
GO:2000634	BP	regulation of primary miRNA processing	3	1	0.0482796	LUSC
GO:2000635	BP	negative regulation of primary miRNA processing	3	1	0.0482796	LUSC
GO:0006537	BP	glutamate biosynthetic process	5	1	0.0483857	LUSC
GO:0042789	BP	mRNA transcription by RNA polymerase II	43	3	0.0484974	LUSC
GO:0045861	BP	negative regulation of proteolysis	326	9	0.048655	LUSC
GO:2000117	BP	negative regulation of cysteine-type endopeptidase activity	87	4	0.0486729	LUSC
GO:0030162	BP	regulation of proteolysis	720	18	0.048836	LUSC
GO:0004345	MF	glucose-6-phosphate dehydrogenase activity	2	1	0.048912	LUSC
GO:0006098	BP	pentose-phosphate shunt	18	2	0.0489303	LUSC
GO:0002039	MF	p53 binding	67	4	0.0492316	LUSC
GO:0002833	BP	positive regulation of response to biotic stimulus	177	6	0.049322	LUSC
GO:0002223	BP	stimulatory C-type lectin receptor signaling pathway	17	2	0.0494907	LUSC
GO:1990840	BP	response to lectin	17	2	0.0494907	LUSC
GO:1990858	BP	cellular response to lectin	17	2	0.0494907	LUSC
GO:1904646	BP	cellular response to amyloid-beta	43	3	0.049971	LUSC

## Sheet: COAD
ID	ONTOLOGY	TERM	N	DE	P.DE	Cancer
GO:0034091	BP	regulation of maintenance of sister chromatid cohesion	8	3	0.00012743	COAD
GO:0034182	BP	regulation of maintenance of mitotic sister chromatid cohesion	8	3	0.00012743	COAD
GO:0035137	BP	hindlimb morphogenesis	35	6	0.000159586	COAD
GO:1904674	BP	positive regulation of somatic stem cell population maintenance	2	2	0.000313225	COAD
GO:0034086	BP	maintenance of sister chromatid cohesion	12	3	0.000581724	COAD
GO:0034088	BP	maintenance of mitotic sister chromatid cohesion	12	3	0.000581724	COAD
GO:0010810	BP	regulation of cell-substrate adhesion	219	12	0.000683533	COAD
GO:0005234	MF	extracellularly glutamate-gated ion channel activity	2	2	0.000821806	COAD
GO:0008217	BP	regulation of blood pressure	189	10	0.000841759	COAD
GO:1901529	BP	positive regulation of anion channel activity	4	2	0.00147569	COAD
GO:0006682	BP	galactosylceramide biosynthetic process	6	2	0.0020435	COAD
GO:0019375	BP	galactolipid biosynthetic process	6	2	0.0020435	COAD
GO:0018216	BP	peptidyl-arginine methylation	18	3	0.00212963	COAD
GO:0034093	BP	positive regulation of maintenance of sister chromatid cohesion	5	2	0.00213745	COAD
GO:0034184	BP	positive regulation of maintenance of mitotic sister chromatid cohesion	5	2	0.00213745	COAD
GO:0010752	BP	regulation of cGMP-mediated signaling	13	3	0.00218145	COAD
GO:1904058	BP	positive regulation of sensory perception of pain	5	2	0.002762	COAD
GO:0007063	BP	regulation of sister chromatid cohesion	21	3	0.00289829	COAD
GO:0060033	BP	anatomical structure regression	16	3	0.00314429	COAD
GO:0046476	BP	glycosylceramide biosynthetic process	8	2	0.00315146	COAD
GO:0006681	BP	galactosylceramide metabolic process	8	2	0.00316686	COAD
GO:0008206	BP	bile acid metabolic process	47	4	0.00338599	COAD
GO:0007044	BP	cell-substrate junction assembly	95	7	0.00380577	COAD
GO:0019374	BP	galactolipid metabolic process	9	2	0.00390592	COAD
GO:0007064	BP	mitotic sister chromatid cohesion	26	3	0.00406551	COAD
GO:0001665	MF	alpha-N-acetylgalactosaminide alpha-2,6-sialyltransferase activity	6	2	0.00434851	COAD
GO:0018195	BP	peptidyl-arginine modification	25	3	0.00452273	COAD
GO:0003810	MF	protein-glutamine gamma-glutamyltransferase activity	9	2	0.00456246	COAD
GO:0150115	BP	cell-substrate junction organization	101	7	0.00512325	COAD
GO:0010359	BP	regulation of anion channel activity	8	2	0.00575235	COAD
GO:0010811	BP	positive regulation of cell-substrate adhesion	125	7	0.00638932	COAD
GO:0045876	BP	positive regulation of sister chromatid cohesion	9	2	0.00640568	COAD
GO:0051584	BP	regulation of dopamine uptake involved in synaptic transmission	8	2	0.00783555	COAD
GO:0051940	BP	regulation of catecholamine uptake involved in synaptic transmission	8	2	0.00783555	COAD
GO:0001079	BP	nitrogen catabolite regulation of transcription from RNA polymerase II promoter	1	1	0.00791235	COAD
GO:0001080	BP	nitrogen catabolite activation of transcription from RNA polymerase II promoter	1	1	0.00791235	COAD
GO:0034255	BP	regulation of urea metabolic process	1	1	0.00791235	COAD
GO:0038185	BP	intracellular bile acid receptor signaling pathway	1	1	0.00791235	COAD
GO:0045848	BP	positive regulation of nitrogen utilization	1	1	0.00791235	COAD
GO:0090293	BP	nitrogen catabolite regulation of transcription	1	1	0.00791235	COAD
GO:0090294	BP	nitrogen catabolite activation of transcription	1	1	0.00791235	COAD
GO:1902122	MF	chenodeoxycholic acid binding	1	1	0.00791235	COAD
GO:1903314	BP	regulation of nitrogen cycle metabolic process	1	1	0.00791235	COAD
GO:1905693	BP	regulation of phosphatidic acid biosynthetic process	1	1	0.00791235	COAD
GO:1905695	BP	positive regulation of phosphatidic acid biosynthetic process	1	1	0.00791235	COAD
GO:2000213	BP	positive regulation of glutamate metabolic process	1	1	0.00791235	COAD
GO:2001248	BP	regulation of ammonia assimilation cycle	1	1	0.00791235	COAD
GO:2001250	BP	positive regulation of ammonia assimilation cycle	1	1	0.00791235	COAD
GO:0070198	BP	protein localization to chromosome, telomeric region	30	3	0.00801345	COAD
GO:0048041	BP	focal adhesion assembly	85	6	0.00862832	COAD
GO:0018149	BP	peptide cross-linking	34	3	0.00869154	COAD
GO:0001952	BP	regulation of cell-matrix adhesion	125	7	0.00870455	COAD
GO:0035360	BP	positive regulation of peroxisome proliferator activated receptor signaling pathway	9	2	0.00870948	COAD
GO:0021563	BP	glossopharyngeal nerve development	5	2	0.00937656	COAD
GO:0051893	BP	regulation of focal adhesion assembly	64	5	0.0099121	COAD
GO:0090109	BP	regulation of cell-substrate junction assembly	64	5	0.0099121	COAD
GO:0032204	BP	regulation of telomere maintenance	99	5	0.0107608	COAD
GO:0032959	BP	inositol trisphosphate biosynthetic process	8	2	0.0108332	COAD
GO:0050901	BP	leukocyte tethering or rolling	33	3	0.0109299	COAD
GO:0042731	MF	PH domain binding	7	2	0.010965	COAD
GO:0035136	BP	forelimb morphogenesis	39	4	0.011211	COAD
GO:0035107	BP	appendage morphogenesis	142	8	0.0113486	COAD
GO:0035108	BP	limb morphogenesis	142	8	0.0113486	COAD
GO:0010259	BP	multicellular organism aging	26	3	0.011485	COAD
GO:1903961	BP	positive regulation of anion transmembrane transport	13	2	0.0118158	COAD
GO:2001252	BP	positive regulation of chromosome organization	103	5	0.0120901	COAD
GO:0034969	BP	histone arginine methylation	13	2	0.0121001	COAD
GO:0035640	BP	exploration behavior	28	3	0.0121916	COAD
GO:0014072	BP	response to isoquinoline alkaloid	28	3	0.01243	COAD
GO:0043278	BP	response to morphine	28	3	0.01243	COAD
GO:0071258	BP	cellular response to gravity	1	1	0.0125137	COAD
GO:1904301	BP	regulation of maternal process involved in parturition	1	1	0.0125137	COAD
GO:1904303	BP	positive regulation of maternal process involved in parturition	1	1	0.0125137	COAD
GO:1904316	BP	response to 2-O-acetyl-1-O-hexadecyl-sn-glycero-3-phosphocholine	1	1	0.0125137	COAD
GO:1904317	BP	cellular response to 2-O-acetyl-1-O-hexadecyl-sn-glycero-3-phosphocholine	1	1	0.0125137	COAD
GO:0048485	BP	sympathetic nervous system development	22	3	0.0126925	COAD
GO:0150116	BP	regulation of cell-substrate junction organization	69	5	0.0134534	COAD
GO:0019932	BP	second-messenger-mediated signaling	306	11	0.0140606	COAD
GO:0022852	MF	glycine-gated chloride ion channel activity	2	1	0.0144902	COAD
GO:0098742	BP	cell-cell adhesion via plasma-membrane adhesion molecules	275	10	0.0145336	COAD
GO:0001715	BP	ectodermal cell fate specification	1	1	0.0145406	COAD
GO:0042665	BP	regulation of ectodermal cell fate specification	1	1	0.0145406	COAD
GO:0042666	BP	negative regulation of ectodermal cell fate specification	1	1	0.0145406	COAD
GO:1990971	CC	EMILIN complex	1	1	0.0147168	COAD
GO:1903532	BP	positive regulation of secretion by cell	276	10	0.0149516	COAD
GO:0043956	MF	3-hydroxypropionyl-CoA dehydratase activity	1	1	0.0150327	COAD
GO:0090303	BP	positive regulation of wound healing	61	4	0.0150739	COAD
GO:0071298	BP	cellular response to L-ascorbic acid	1	1	0.0153352	COAD
GO:1904651	BP	positive regulation of fat cell apoptotic process	1	1	0.0153352	COAD
GO:2000486	BP	negative regulation of glutamine transport	1	1	0.0153352	COAD
GO:0007610	BP	behavior	621	19	0.0153446	COAD
GO:0002756	BP	MyD88-independent toll-like receptor signaling pathway	14	2	0.0156316	COAD
GO:0016755	MF	aminoacyltransferase activity	16	2	0.0157911	COAD
GO:0006688	BP	glycosphingolipid biosynthetic process	33	3	0.0157927	COAD
GO:0051967	BP	negative regulation of synaptic transmission, glutamatergic	10	2	0.0157997	COAD
GO:0008344	BP	adult locomotory behavior	79	5	0.0158044	COAD
GO:0007499	BP	ectoderm and mesoderm interaction	1	1	0.0158962	COAD
GO:0071361	BP	cellular response to ethanol	14	2	0.0159214	COAD
GO:0035815	BP	positive regulation of renal sodium excretion	12	2	0.015998	COAD
GO:0030534	BP	adult behavior	141	7	0.0161383	COAD
GO:0031589	BP	cell-substrate adhesion	363	13	0.016669	COAD
GO:0001954	BP	positive regulation of cell-matrix adhesion	56	4	0.016754	COAD
GO:0006677	BP	glycosylceramide metabolic process	18	2	0.0169114	COAD
GO:0021536	BP	diencephalon development	75	5	0.0170668	COAD
GO:0007156	BP	homophilic cell adhesion via plasma membrane adhesion molecules	165	7	0.0170711	COAD
GO:0003851	MF	2-hydroxyacylsphingosine 1-beta-galactosyltransferase activity	1	1	0.0173875	COAD
GO:0047263	MF	N-acylsphingosine galactosyltransferase activity	1	1	0.0173875	COAD
GO:0003073	BP	regulation of systemic arterial blood pressure	95	5	0.0176709	COAD
GO:0046888	BP	negative regulation of hormone secretion	62	4	0.0179663	COAD
GO:0000723	BP	telomere maintenance	151	6	0.0182268	COAD
GO:0050840	MF	extracellular matrix binding	56	4	0.0184303	COAD
GO:1901203	BP	positive regulation of extracellular matrix assembly	10	2	0.0185907	COAD
GO:0060795	BP	cell fate commitment involved in formation of primary germ layer	33	3	0.0193364	COAD
GO:1990380	MF	Lys48-specific deubiquitinase activity	15	2	0.0193529	COAD
GO:0034035	BP	purine ribonucleoside bisphosphate metabolic process	18	2	0.0194135	COAD
GO:0050427	BP	3'-phosphoadenosine 5'-phosphosulfate metabolic process	18	2	0.0194135	COAD
GO:1905521	BP	regulation of macrophage migration	44	3	0.0194491	COAD
GO:0002174	BP	mammary stem cell proliferation	1	1	0.0195625	COAD
GO:1904677	BP	positive regulation of somatic stem cell division	1	1	0.0195625	COAD
GO:2000101	BP	regulation of mammary stem cell proliferation	1	1	0.0195625	COAD
GO:2000103	BP	positive regulation of mammary stem cell proliferation	1	1	0.0195625	COAD
GO:0030432	BP	peristalsis	12	2	0.0202181	COAD
GO:0070486	BP	leukocyte aggregation	13	2	0.0204373	COAD
GO:0048483	BP	autonomic nervous system development	48	4	0.0205861	COAD
GO:1901836	BP	regulation of transcription of nucleolar large rRNA by RNA polymerase I	15	2	0.0208248	COAD
GO:0004982	MF	N-formyl peptide receptor activity	3	1	0.0210438	COAD
GO:0045764	BP	positive regulation of cellular amino acid metabolic process	2	1	0.0212499	COAD
GO:0005496	MF	steroid binding	98	5	0.0213291	COAD
GO:0034442	BP	regulation of lipoprotein oxidation	2	1	0.0218934	COAD
GO:0060587	BP	regulation of lipoprotein lipid oxidation	2	1	0.0218934	COAD
GO:0021998	BP	neural plate mediolateral regionalization	1	1	0.0219505	COAD
GO:0048338	BP	mesoderm structural organization	1	1	0.0219505	COAD
GO:0048352	BP	paraxial mesoderm structural organization	1	1	0.0219505	COAD
GO:0048372	BP	lateral mesodermal cell fate commitment	1	1	0.0219505	COAD
GO:0048377	BP	lateral mesodermal cell fate specification	1	1	0.0219505	COAD
GO:0048378	BP	regulation of lateral mesodermal cell fate specification	1	1	0.0219505	COAD
GO:1904412	BP	regulation of cardiac ventricle development	1	1	0.0219505	COAD
GO:1904414	BP	positive regulation of cardiac ventricle development	1	1	0.0219505	COAD
GO:1905285	BP	fibrous ring of heart morphogenesis	1	1	0.0219505	COAD
GO:0004595	MF	pantetheine-phosphate adenylyltransferase activity	1	1	0.0220461	COAD
GO:0043169	MF	cation binding	4150	77	0.0221113	COAD
GO:0010761	BP	fibroblast migration	55	4	0.0222102	COAD
GO:1904606	BP	fat cell apoptotic process	2	1	0.0222345	COAD
GO:1904649	BP	regulation of fat cell apoptotic process	2	1	0.0222345	COAD
GO:0008479	MF	queuine tRNA-ribosyltransferase activity	2	1	0.0224611	COAD
GO:0051583	BP	dopamine uptake involved in synaptic transmission	12	2	0.0229804	COAD
GO:0051934	BP	catecholamine uptake involved in synaptic transmission	12	2	0.0229804	COAD
GO:0031893	MF	vasopressin receptor binding	2	1	0.0233046	COAD
GO:0031894	MF	V1A vasopressin receptor binding	2	1	0.0233046	COAD
GO:0035358	BP	regulation of peroxisome proliferator activated receptor signaling pathway	15	2	0.0233328	COAD
GO:1904672	BP	regulation of somatic stem cell population maintenance	11	2	0.0234291	COAD
GO:0010749	BP	regulation of nitric oxide mediated signal transduction	11	2	0.0235749	COAD
GO:0032467	BP	positive regulation of cytokinesis	42	3	0.0236553	COAD
GO:0019751	BP	polyol metabolic process	116	5	0.0237588	COAD
GO:0032957	BP	inositol trisphosphate metabolic process	12	2	0.0238678	COAD
GO:2000379	BP	positive regulation of reactive oxygen species metabolic process	68	4	0.0241727	COAD
GO:1901615	BP	organic hydroxy compound metabolic process	545	14	0.0242779	COAD
GO:0019934	BP	cGMP-mediated signaling	35	3	0.0244615	COAD
GO:0033889	MF	N-sulfoglucosamine-3-sulfatase activity	1	1	0.0247195	COAD
GO:0099403	BP	maintenance of mitotic sister chromatid cohesion, telomeric	2	1	0.0249403	COAD
GO:0099404	BP	mitotic sister chromatid cohesion, telomeric	2	1	0.0249403	COAD
GO:1904907	BP	regulation of maintenance of mitotic sister chromatid cohesion, telomeric	2	1	0.0249403	COAD
GO:1904908	BP	negative regulation of maintenance of mitotic sister chromatid cohesion, telomeric	2	1	0.0249403	COAD
GO:0033147	BP	negative regulation of intracellular estrogen receptor signaling pathway	15	2	0.0253093	COAD
GO:0048103	BP	somatic stem cell division	12	2	0.025425	COAD
GO:0098640	MF	integrin binding involved in cell-matrix adhesion	2	1	0.0254307	COAD
GO:1902941	BP	regulation of voltage-gated chloride channel activity	2	1	0.0257477	COAD
GO:1902943	BP	positive regulation of voltage-gated chloride channel activity	2	1	0.0257477	COAD
GO:0060079	BP	excitatory postsynaptic potential	123	6	0.0260762	COAD
GO:0034971	BP	histone H3-R17 methylation	3	1	0.0263069	COAD
GO:0051047	BP	positive regulation of secretion	302	10	0.0263169	COAD
GO:0008284	BP	positive regulation of cell population proliferation	950	23	0.0263896	COAD
GO:0034777	CC	recycling endosome lumen	1	1	0.0265876	COAD
GO:0010919	BP	regulation of inositol phosphate biosynthetic process	16	2	0.0266333	COAD
GO:0016605	CC	PML body	102	5	0.0267661	COAD
GO:2000573	BP	positive regulation of DNA biosynthetic process	74	4	0.0270711	COAD
GO:0007625	BP	grooming behavior	19	2	0.0272493	COAD
GO:1904675	BP	regulation of somatic stem cell division	2	1	0.0273341	COAD
GO:0018025	MF	calmodulin-lysine N-methyltransferase activity	1	1	0.0274817	COAD
GO:1904743	BP	negative regulation of telomeric DNA binding	2	1	0.0274937	COAD
GO:0046872	MF	metal ion binding	4061	75	0.0275919	COAD
GO:0008068	MF	extracellularly glutamate-gated chloride channel activity	1	1	0.027862	COAD
GO:0035810	BP	positive regulation of urine volume	13	2	0.0279683	COAD
GO:0007369	BP	gastrulation	192	8	0.0281494	COAD
GO:0001976	BP	nervous system process involved in regulation of systemic arterial blood pressure	14	2	0.0282355	COAD
GO:0031646	BP	positive regulation of nervous system process	36	3	0.0283212	COAD
GO:0070443	CC	Mad-Max complex	2	1	0.0283635	COAD
GO:0034439	BP	lipoprotein lipid oxidation	3	1	0.0286031	COAD
GO:0042160	BP	lipoprotein modification	3	1	0.0286031	COAD
GO:0042161	BP	lipoprotein oxidation	3	1	0.0286031	COAD
GO:2000324	BP	positive regulation of glucocorticoid receptor signaling pathway	1	1	0.0286815	COAD
GO:0098753	CC	anchored component of the cytoplasmic side of the plasma membrane	1	1	0.0286848	COAD
GO:1903793	BP	positive regulation of anion transport	51	3	0.0290223	COAD
GO:0007626	BP	locomotory behavior	196	8	0.0290566	COAD
GO:0035116	BP	embryonic hindlimb morphogenesis	28	3	0.02917	COAD
GO:0033144	BP	negative regulation of intracellular steroid hormone receptor signaling pathway	37	3	0.0292812	COAD
GO:0048736	BP	appendage development	177	8	0.0293229	COAD
GO:0060173	BP	limb development	177	8	0.0293229	COAD
GO:0001712	BP	ectodermal cell fate commitment	2	1	0.0293772	COAD
GO:0090571	CC	RNA polymerase II transcription repressor complex	15	2	0.0293907	COAD
GO:0062035	BP	sensory perception of cold stimulus	1	1	0.0295757	COAD
GO:0120169	BP	detection of cold stimulus involved in thermoception	1	1	0.0295757	COAD
GO:0032200	BP	telomere organization	179	6	0.0296205	COAD
GO:0034329	BP	cell junction assembly	422	14	0.0296343	COAD
GO:0007160	BP	cell-matrix adhesion	236	9	0.0297275	COAD
GO:0030522	BP	intracellular receptor signaling pathway	262	9	0.0299086	COAD
GO:0009790	BP	embryo development	1117	29	0.0300336	COAD
GO:0101030	BP	tRNA-guanine transglycosylation	3	1	0.0301214	COAD
GO:0030551	MF	cyclic nucleotide binding	37	3	0.0302455	COAD
GO:2000381	BP	negative regulation of mesoderm development	3	1	0.0302842	COAD
GO:0005124	MF	scavenger receptor binding	4	1	0.0303612	COAD
GO:0031645	BP	negative regulation of nervous system process	19	2	0.030451	COAD
GO:0098810	BP	neurotransmitter reuptake	36	3	0.0307382	COAD
GO:0033143	BP	regulation of intracellular steroid hormone receptor signaling pathway	71	4	0.0307395	COAD
GO:0030148	BP	sphingolipid biosynthetic process	109	5	0.0308904	COAD
GO:1904791	BP	negative regulation of shelterin complex assembly	1	1	0.0308935	COAD
GO:0099565	BP	chemical synaptic transmission, postsynaptic	129	6	0.0311687	COAD
GO:0097275	BP	cellular ammonium homeostasis	1	1	0.0313148	COAD
GO:0097276	BP	cellular creatinine homeostasis	1	1	0.0313148	COAD
GO:0097277	BP	cellular urea homeostasis	1	1	0.0313148	COAD
GO:0010903	BP	negative regulation of very-low-density lipoprotein particle remodeling	4	1	0.031403	COAD
GO:0002125	BP	maternal aggressive behavior	3	1	0.0314368	COAD
GO:0043157	BP	response to cation stress	1	1	0.0314493	COAD
GO:0043423	MF	3-phosphoinositide-dependent protein kinase binding	1	1	0.0314493	COAD
GO:2000537	BP	regulation of B cell chemotaxis	1	1	0.0314493	COAD
GO:2000538	BP	positive regulation of B cell chemotaxis	1	1	0.0314493	COAD
GO:0019220	BP	regulation of phosphate metabolic process	1366	31	0.0314904	COAD
GO:0046965	MF	nuclear retinoid X receptor binding	15	2	0.0316655	COAD
GO:1903036	BP	positive regulation of response to wounding	76	4	0.0316743	COAD
GO:0004027	MF	alcohol sulfotransferase activity	3	1	0.0317209	COAD
GO:0051174	BP	regulation of phosphorus metabolic process	1367	31	0.0320615	COAD
GO:2001029	BP	regulation of cellular glucuronidation	1	1	0.0321015	COAD
GO:2001031	BP	positive regulation of cellular glucuronidation	1	1	0.0321015	COAD
GO:0005230	MF	extracellular ligand-gated ion channel activity	73	4	0.0322216	COAD
GO:0050294	MF	steroid sulfotransferase activity	3	1	0.0323601	COAD
GO:2000353	BP	positive regulation of endothelial cell apoptotic process	24	2	0.032491	COAD
GO:0034092	BP	negative regulation of maintenance of sister chromatid cohesion	3	1	0.032689	COAD
GO:0034183	BP	negative regulation of maintenance of mitotic sister chromatid cohesion	3	1	0.032689	COAD
GO:1904766	BP	negative regulation of macroautophagy by TORC1 signaling	1	1	0.0326964	COAD
GO:0090278	BP	negative regulation of peptide hormone secretion	40	3	0.0327214	COAD
GO:0008489	MF	UDP-galactose:glucosylceramide beta-1,4-galactosyltransferase activity	3	1	0.0328812	COAD
GO:0046839	BP	phospholipid dephosphorylation	45	3	0.0328825	COAD
GO:0062012	BP	regulation of small molecule metabolic process	332	10	0.0330133	COAD
GO:0007062	BP	sister chromatid cohesion	57	3	0.0331087	COAD
GO:0019676	BP	ammonia assimilation cycle	3	1	0.0332005	COAD
GO:0070052	MF	collagen V binding	2	1	0.0332953	COAD
GO:0010812	BP	negative regulation of cell-substrate adhesion	64	4	0.0333153	COAD
GO:0038181	MF	bile acid receptor activity	3	1	0.0333468	COAD
GO:1904027	BP	negative regulation of collagen fibril organization	3	1	0.0336766	COAD
GO:0009755	BP	hormone-mediated signaling pathway	186	7	0.0336787	COAD
GO:0071636	BP	positive regulation of transforming growth factor beta production	20	2	0.0338685	COAD
GO:0051954	BP	positive regulation of amine transport	43	3	0.0340898	COAD
GO:0033082	BP	regulation of extrathymic T cell differentiation	2	1	0.0342195	COAD
GO:0002792	BP	negative regulation of peptide secretion	41	3	0.0345128	COAD
GO:0061756	BP	leukocyte adhesion to vascular endothelial cell	56	3	0.034988	COAD
GO:0019785	MF	ISG15-specific peptidase activity	2	1	0.0350944	COAD
GO:0101005	MF	deubiquitinase activity	91	4	0.0353174	COAD
GO:0031161	BP	phosphatidylinositol catabolic process	2	1	0.0356413	COAD
GO:0004062	MF	aryl sulfotransferase activity	6	1	0.0357698	COAD
GO:0035904	BP	aorta development	62	4	0.0358475	COAD
GO:0035813	BP	regulation of renal sodium excretion	19	2	0.0361479	COAD
GO:1903797	BP	positive regulation of inorganic anion transmembrane transport	3	1	0.0361593	COAD
GO:0042790	BP	nucleolar large rRNA transcription by RNA polymerase I	21	2	0.0363384	COAD
GO:0110032	BP	positive regulation of G2/MI transition of meiotic cell cycle	3	1	0.0368764	COAD
GO:0030518	BP	intracellular steroid hormone receptor signaling pathway	112	5	0.0372482	COAD
GO:0044070	BP	regulation of anion transport	92	4	0.0374465	COAD
GO:1904815	BP	negative regulation of protein localization to chromosome, telomeric region	2	1	0.0382304	COAD
GO:0051923	BP	sulfation	21	2	0.0382693	COAD
GO:0010675	BP	regulation of cellular carbohydrate metabolic process	151	6	0.0387401	COAD
GO:2000211	BP	regulation of glutamate metabolic process	3	1	0.0389085	COAD
GO:0071034	BP	CUT catabolic process	5	1	0.038964	COAD
GO:0071043	BP	CUT metabolic process	5	1	0.038964	COAD
GO:0002079	CC	inner acrosomal membrane	5	1	0.0389853	COAD
GO:0099095	MF	ligand-gated anion channel activity	19	2	0.039229	COAD
GO:1990785	BP	response to water-immersion restraint stress	2	1	0.0392524	COAD
GO:1990665	CC	AnxA2-p11 complex	2	1	0.0392791	COAD
GO:0016051	BP	carbohydrate biosynthetic process	210	7	0.0394538	COAD
GO:1901201	BP	regulation of extracellular matrix assembly	16	2	0.0396368	COAD
GO:0003727	MF	single-stranded RNA binding	88	4	0.0397479	COAD
GO:1903413	BP	cellular response to bile acid	5	1	0.0398953	COAD
GO:0071573	BP	shelterin complex assembly	2	1	0.0399929	COAD
GO:1904790	BP	regulation of shelterin complex assembly	2	1	0.0399929	COAD
GO:0005863	CC	striated muscle myosin thick filament	3	1	0.0400703	COAD
GO:0090494	BP	dopamine uptake	17	2	0.0402929	COAD
GO:0010755	BP	regulation of plasminogen activation	18	2	0.0403388	COAD
GO:0097273	BP	creatinine homeostasis	2	1	0.0404284	COAD
GO:0007043	BP	cell-cell junction assembly	147	6	0.0408129	COAD
GO:0035692	CC	macrophage migration inhibitory factor receptor complex	2	1	0.0409075	COAD
GO:0032412	BP	regulation of ion transmembrane transporter activity	274	9	0.0409136	COAD
GO:1901253	BP	negative regulation of intracellular transport of viral material	2	1	0.0411019	COAD
GO:0000254	MF	C-4 methylsterol oxidase activity	3	1	0.0414721	COAD
GO:0031325	BP	positive regulation of cellular metabolic process	3030	60	0.0414839	COAD
GO:0110030	BP	regulation of G2/MI transition of meiotic cell cycle	4	1	0.0416974	COAD
GO:0071943	CC	Myc-Max complex	2	1	0.0418052	COAD
GO:0038108	BP	negative regulation of appetite by leptin-mediated signaling pathway	4	1	0.0418163	COAD
GO:0140747	BP	regulation of ncRNA transcription	23	2	0.0420937	COAD
GO:0036379	CC	myofilament	24	2	0.0423802	COAD
GO:0035276	MF	ethanol binding	3	1	0.0424024	COAD
GO:0031014	MF	troponin T binding	4	1	0.0424808	COAD
GO:0030326	BP	embryonic limb morphogenesis	118	6	0.0430865	COAD
GO:0035113	BP	embryonic appendage morphogenesis	118	6	0.0430865	COAD
GO:0031328	BP	positive regulation of cellular biosynthetic process	1979	42	0.0433767	COAD
GO:0010481	BP	epidermal cell division	3	1	0.0435227	COAD
GO:0010482	BP	regulation of epidermal cell division	3	1	0.0435227	COAD
GO:0008143	MF	poly(A) binding	24	2	0.0435537	COAD
GO:0005231	MF	excitatory extracellular ligand-gated ion channel activity	55	3	0.0437167	COAD
GO:0033686	BP	positive regulation of luteinizing hormone secretion	4	1	0.0438949	COAD
GO:0008934	MF	inositol monophosphate 1-phosphatase activity	3	1	0.0439085	COAD
GO:0052832	MF	inositol monophosphate 3-phosphatase activity	3	1	0.0439085	COAD
GO:0052833	MF	inositol monophosphate 4-phosphatase activity	3	1	0.0439085	COAD
GO:0052834	MF	inositol monophosphate phosphatase activity	3	1	0.0439085	COAD
GO:0050805	BP	negative regulation of synaptic transmission	72	4	0.0445244	COAD
GO:0051279	BP	regulation of release of sequestered calcium ion into cytosol	81	4	0.0445445	COAD
GO:0090493	BP	catecholamine uptake	18	2	0.0445651	COAD
GO:0070093	BP	negative regulation of glucagon secretion	4	1	0.0446114	COAD
GO:0010762	BP	regulation of fibroblast migration	40	3	0.0448033	COAD
GO:0051580	BP	regulation of neurotransmitter uptake	18	2	0.044848	COAD
GO:0035812	BP	renal sodium excretion	21	2	0.0448774	COAD
GO:0044062	BP	regulation of excretion	22	2	0.0450434	COAD
GO:0009409	BP	response to cold	51	3	0.0451111	COAD
GO:0072283	BP	metanephric renal vesicle morphogenesis	15	2	0.0451642	COAD
GO:0052745	MF	inositol phosphate phosphatase activity	18	2	0.0451809	COAD
GO:0009608	BP	response to symbiont	5	1	0.0455434	COAD
GO:0009609	BP	response to symbiotic bacterium	5	1	0.0455434	COAD
GO:0002605	BP	negative regulation of dendritic cell antigen processing and presentation	4	1	0.0456407	COAD
GO:1904298	BP	regulation of transcytosis	2	1	0.0457428	COAD
GO:1904300	BP	positive regulation of transcytosis	2	1	0.0457428	COAD
GO:1905517	BP	macrophage migration	60	3	0.0457604	COAD
GO:0008146	MF	sulfotransferase activity	49	3	0.0458494	COAD
GO:0048807	BP	female genitalia morphogenesis	3	1	0.0458607	COAD
GO:0001710	BP	mesodermal cell fate commitment	18	2	0.0460813	COAD
GO:0006808	BP	regulation of nitrogen utilization	3	1	0.0461514	COAD
GO:0031752	MF	D5 dopamine receptor binding	2	1	0.0464767	COAD
GO:0002687	BP	positive regulation of leukocyte migration	140	5	0.0465222	COAD
GO:0035668	BP	TRAM-dependent toll-like receptor signaling pathway	3	1	0.0469573	COAD
GO:0035669	BP	TRAM-dependent toll-like receptor 4 signaling pathway	3	1	0.0469573	COAD
GO:0036313	MF	phosphatidylinositol 3-kinase catalytic subunit binding	3	1	0.0470342	COAD
GO:0120092	MF	crotonyl-CoA hydratase activity	2	1	0.0473342	COAD
GO:0005608	CC	laminin-3 complex	3	1	0.0476669	COAD
GO:0010470	BP	regulation of gastrulation	16	2	0.0477192	COAD
GO:1903412	BP	response to bile acid	6	1	0.0477446	COAD
GO:0060529	BP	squamous basal epithelial stem cell differentiation involved in prostate gland acinus development	2	1	0.0478299	COAD
GO:0004165	MF	delta(3)-delta(2)-enoyl-CoA isomerase activity	4	1	0.0478721	COAD
GO:1901252	BP	regulation of intracellular transport of viral material	3	1	0.0482756	COAD
GO:0010557	BP	positive regulation of macromolecule biosynthetic process	1870	40	0.0483149	COAD
GO:0097274	BP	urea homeostasis	3	1	0.0485006	COAD
GO:0010901	BP	regulation of very-low-density lipoprotein particle remodeling	6	1	0.0485748	COAD
GO:0051781	BP	positive regulation of cell division	89	4	0.0486194	COAD
GO:0001591	MF	dopamine neurotransmitter receptor activity, coupled via Gi/Go	3	1	0.0486403	COAD
GO:0022898	BP	regulation of transmembrane transporter activity	284	9	0.0486419	COAD
GO:0045747	BP	positive regulation of Notch signaling pathway	45	3	0.048898	COAD
GO:0008355	BP	olfactory learning	2	1	0.0489445	COAD
GO:0106002	CC	mCRD-mediated mRNA stability complex	5	1	0.0491578	COAD
GO:0060078	BP	regulation of postsynaptic membrane potential	144	6	0.0491861	COAD
GO:0004992	MF	platelet activating factor receptor activity	3	1	0.0493941	COAD
GO:0001880	BP	Mullerian duct regression	4	1	0.0493956	COAD
GO:0021983	BP	pituitary gland development	41	3	0.0494619	COAD
GO:0032915	BP	positive regulation of transforming growth factor beta2 production	3	1	0.0494629	COAD
GO:0019783	MF	ubiquitin-like protein peptidase activity	104	4	0.0495777	COAD
GO:0046173	BP	polyol biosynthetic process	61	3	0.0496713	COAD
GO:0004140	MF	dephospho-CoA kinase activity	2	1	0.0497497	COAD

## Sheet: KIRC
ID	ONTOLOGY	TERM	N	DE	P.DE	Cancer
GO:0006814	BP	sodium ion transport	252	24	1.16147e-05	KIRC
GO:0035725	BP	sodium ion transmembrane transport	182	20	1.81564e-05	KIRC
GO:0055067	BP	monovalent inorganic cation homeostasis	161	15	0.000123914	KIRC
GO:0060974	BP	cell migration involved in heart formation	2	2	0.000213685	KIRC
GO:0015081	MF	sodium ion transmembrane transporter activity	155	15	0.000252623	KIRC
GO:0055075	BP	potassium ion homeostasis	35	7	0.000253626	KIRC
GO:0035606	BP	peptidyl-cysteine S-trans-nitrosylation	2	2	0.00040752	KIRC
GO:0051153	BP	regulation of striated muscle cell differentiation	96	11	0.000469228	KIRC
GO:0034142	BP	toll-like receptor 4 signaling pathway	39	6	0.000497119	KIRC
GO:0015144	MF	carbohydrate transmembrane transporter activity	41	6	0.000640677	KIRC
GO:0050891	BP	multicellular organismal water homeostasis	64	8	0.0006738	KIRC
GO:0051287	MF	NAD binding	53	7	0.000695625	KIRC
GO:0036020	CC	endolysosome membrane	20	5	0.000735199	KIRC
GO:0030157	BP	pancreatic juice secretion	13	4	0.000741827	KIRC
GO:0050878	BP	regulation of body fluid levels	383	25	0.000743561	KIRC
GO:0030104	BP	water homeostasis	69	8	0.000990025	KIRC
GO:0005773	CC	vacuole	812	39	0.00106295	KIRC
GO:0106346	MF	snRNA methyltransferase activity	2	2	0.00109834	KIRC
GO:0120049	BP	snRNA (adenine-N6)-methylation	2	2	0.00109834	KIRC
GO:0015370	MF	solute:sodium symporter activity	75	8	0.00119655	KIRC
GO:0009991	BP	response to extracellular stimulus	492	29	0.00144555	KIRC
GO:0071288	BP	cellular response to mercury ion	3	2	0.00145839	KIRC
GO:0051154	BP	negative regulation of striated muscle cell differentiation	40	6	0.00150062	KIRC
GO:0055064	BP	chloride ion homeostasis	20	5	0.00170104	KIRC
GO:0055083	BP	monovalent inorganic anion homeostasis	20	5	0.00170104	KIRC
GO:0010830	BP	regulation of myotube differentiation	46	7	0.00186999	KIRC
GO:0015136	MF	sialic acid transmembrane transporter activity	5	2	0.0019444	KIRC
GO:0015739	BP	sialic acid transport	5	2	0.0019444	KIRC
GO:0036019	CC	endolysosome	29	5	0.00234205	KIRC
GO:0031667	BP	response to nutrient levels	462	27	0.00236532	KIRC
GO:0015294	MF	solute:cation symporter activity	108	10	0.00253102	KIRC
GO:0071496	BP	cellular response to external stimulus	320	20	0.00266297	KIRC
GO:0046689	BP	response to mercury ion	10	3	0.00271918	KIRC
GO:0031668	BP	cellular response to extracellular stimulus	255	17	0.00320926	KIRC
GO:1990168	BP	protein K33-linked deubiquitination	4	2	0.00323523	KIRC
GO:0061517	BP	macrophage proliferation	12	3	0.00338357	KIRC
GO:0010133	BP	proline catabolic process to glutamate	3	2	0.00344273	KIRC
GO:0042328	MF	heparan sulfate N-acetylglucosaminyltransferase activity	2	2	0.00347731	KIRC
GO:0050509	MF	N-acetylglucosaminyl-proteoglycan 4-beta-glucuronosyltransferase activity	2	2	0.00347731	KIRC
GO:0003091	BP	renal water homeostasis	24	4	0.00356819	KIRC
GO:0046031	BP	ADP metabolic process	91	9	0.0036704	KIRC
GO:0022853	MF	active ion transmembrane transporter activity	268	17	0.00372867	KIRC
GO:0006808	BP	regulation of nitrogen utilization	3	2	0.00381639	KIRC
GO:0031669	BP	cellular response to nutrient levels	225	15	0.00422231	KIRC
GO:0034143	BP	regulation of toll-like receptor 4 signaling pathway	24	4	0.00425437	KIRC
GO:0051090	BP	regulation of DNA-binding transcription factor activity	444	25	0.00439987	KIRC
GO:0030004	BP	cellular monovalent inorganic cation homeostasis	112	9	0.00444716	KIRC
GO:1902001	BP	fatty acid transmembrane transport	18	4	0.00446154	KIRC
GO:0014850	BP	response to muscle activity	24	4	0.00463349	KIRC
GO:0071947	BP	protein deubiquitination involved in ubiquitin-dependent protein catabolic process	5	2	0.00466115	KIRC
GO:0006562	BP	proline catabolic process	4	2	0.00488019	KIRC
GO:0016903	MF	oxidoreductase activity, acting on the aldehyde or oxo group of donors	47	5	0.00494103	KIRC
GO:0003014	BP	renal system process	120	10	0.00500124	KIRC
GO:0019829	MF	ATPase-coupled cation transmembrane transporter activity	53	6	0.00523051	KIRC
GO:0035523	BP	protein K29-linked deubiquitination	5	2	0.00547348	KIRC
GO:0071470	BP	cellular response to osmotic stress	47	6	0.00550525	KIRC
GO:0015168	MF	glycerol transmembrane transporter activity	7	2	0.00577498	KIRC
GO:0015793	BP	glycerol transmembrane transport	7	2	0.00577498	KIRC
GO:0009678	MF	pyrophosphate hydrolysis-driven proton transmembrane transporter activity	27	4	0.00579662	KIRC
GO:0015145	MF	monosaccharide transmembrane transporter activity	27	4	0.00583403	KIRC
GO:0042116	BP	macrophage activation	109	9	0.00600135	KIRC
GO:0031233	CC	intrinsic component of external side of plasma membrane	23	4	0.00610923	KIRC
GO:0055078	BP	sodium ion homeostasis	55	6	0.00611025	KIRC
GO:0050508	MF	glucuronosyl-N-acetylglucosaminyl-proteoglycan 4-alpha-N-acetylglucosaminyltransferase activity	3	2	0.00626108	KIRC
GO:0006885	BP	regulation of pH	97	8	0.00649137	KIRC
GO:0000323	CC	lytic vacuole	722	33	0.00649477	KIRC
GO:0005764	CC	lysosome	722	33	0.00649477	KIRC
GO:0005324	MF	long-chain fatty acid transporter activity	17	3	0.00656764	KIRC
GO:0071472	BP	cellular response to salt stress	12	3	0.00661347	KIRC
GO:0005774	CC	vacuolar membrane	449	23	0.00674541	KIRC
GO:0071949	MF	FAD binding	39	5	0.0068423	KIRC
GO:0006096	BP	glycolytic process	82	8	0.00690783	KIRC
GO:0006090	BP	pyruvate metabolic process	107	9	0.0069503	KIRC
GO:0006757	BP	ATP generation from ADP	83	8	0.00730966	KIRC
GO:0071622	BP	regulation of granulocyte chemotaxis	51	5	0.00762987	KIRC
GO:0071621	BP	granulocyte chemotaxis	124	8	0.00763534	KIRC
GO:0032612	BP	interleukin-1 production	125	8	0.00772024	KIRC
GO:0032652	BP	regulation of interleukin-1 production	125	8	0.00772024	KIRC
GO:0060263	BP	regulation of respiratory burst	15	3	0.00781598	KIRC
GO:0070062	CC	extracellular exosome	2080	77	0.00787586	KIRC
GO:0035425	BP	autocrine signaling	6	2	0.00795455	KIRC
GO:0008078	BP	mesodermal cell migration	4	2	0.00804564	KIRC
GO:0002224	BP	toll-like receptor signaling pathway	118	9	0.00808622	KIRC
GO:0051119	MF	sugar transmembrane transporter activity	29	4	0.00816058	KIRC
GO:0051147	BP	regulation of muscle cell differentiation	159	12	0.00821683	KIRC
GO:0071361	BP	cellular response to ethanol	14	3	0.00855961	KIRC
GO:0030641	BP	regulation of cellular pH	88	7	0.00898472	KIRC
GO:0009135	BP	purine nucleoside diphosphate metabolic process	103	9	0.009154	KIRC
GO:0009179	BP	purine ribonucleoside diphosphate metabolic process	103	9	0.009154	KIRC
GO:1903561	CC	extracellular vesicle	2151	78	0.00930113	KIRC
GO:0019740	BP	nitrogen utilization	5	2	0.0093506	KIRC
GO:0043230	CC	extracellular organelle	2152	78	0.00935967	KIRC
GO:0065010	CC	extracellular membrane-bounded organelle	2152	78	0.00935967	KIRC
GO:0090235	BP	regulation of metaphase plate congression	13	3	0.00955746	KIRC
GO:0071936	MF	coreceptor activity involved in Wnt signaling pathway	9	3	0.00967501	KIRC
GO:0007589	BP	body fluid secretion	87	8	0.00974394	KIRC
GO:0040008	BP	regulation of growth	611	34	0.00985917	KIRC
GO:0007028	BP	cytoplasm organization	15	3	0.0101103	KIRC
GO:0030132	CC	clathrin coat of coated pit	14	3	0.0104286	KIRC
GO:0071474	BP	cellular hyperosmotic response	15	3	0.0104301	KIRC
GO:1990405	MF	protein antigen binding	5	2	0.0105577	KIRC
GO:0070293	BP	renal absorption	29	4	0.0108791	KIRC
GO:0040031	BP	snRNA modification	7	2	0.0109225	KIRC
GO:0046581	CC	intercellular canaliculus	6	2	0.0109693	KIRC
GO:0090239	BP	regulation of histone H4 acetylation	14	3	0.0114399	KIRC
GO:0042044	BP	fluid transport	32	4	0.0119952	KIRC
GO:0031115	BP	negative regulation of microtubule polymerization	13	3	0.0121223	KIRC
GO:0015791	BP	polyol transmembrane transport	10	2	0.0123058	KIRC
GO:0035579	CC	specific granule membrane	89	7	0.0124288	KIRC
GO:0032941	BP	secretion by tissue	40	5	0.0124715	KIRC
GO:0032712	BP	negative regulation of interleukin-3 production	1	1	0.0129038	KIRC
GO:0071656	BP	negative regulation of granulocyte colony-stimulating factor production	1	1	0.0129038	KIRC
GO:0120041	BP	positive regulation of macrophage proliferation	7	2	0.0129823	KIRC
GO:0005402	MF	carbohydrate:cation symporter activity	16	3	0.0132642	KIRC
GO:0045123	BP	cellular extravasation	71	6	0.0132723	KIRC
GO:0016324	CC	apical plasma membrane	362	20	0.0133851	KIRC
GO:0009185	BP	ribonucleoside diphosphate metabolic process	113	9	0.013507	KIRC
GO:0061518	BP	microglial cell proliferation	8	2	0.013876	KIRC
GO:0034219	BP	carbohydrate transmembrane transport	128	9	0.0139657	KIRC
GO:1904415	BP	regulation of xenophagy	8	2	0.0141846	KIRC
GO:1904417	BP	positive regulation of xenophagy	8	2	0.0141846	KIRC
GO:0047962	MF	glycine N-benzoyltransferase activity	1	1	0.0142395	KIRC
GO:1901787	BP	benzoyl-CoA metabolic process	1	1	0.0142395	KIRC
GO:0045471	BP	response to ethanol	127	10	0.0143745	KIRC
GO:0003147	BP	neural crest cell migration involved in heart formation	1	1	0.0144143	KIRC
GO:0001079	BP	nitrogen catabolite regulation of transcription from RNA polymerase II promoter	1	1	0.0144521	KIRC
GO:0001080	BP	nitrogen catabolite activation of transcription from RNA polymerase II promoter	1	1	0.0144521	KIRC
GO:0034255	BP	regulation of urea metabolic process	1	1	0.0144521	KIRC
GO:0038185	BP	intracellular bile acid receptor signaling pathway	1	1	0.0144521	KIRC
GO:0045848	BP	positive regulation of nitrogen utilization	1	1	0.0144521	KIRC
GO:0090293	BP	nitrogen catabolite regulation of transcription	1	1	0.0144521	KIRC
GO:0090294	BP	nitrogen catabolite activation of transcription	1	1	0.0144521	KIRC
GO:1902122	MF	chenodeoxycholic acid binding	1	1	0.0144521	KIRC
GO:1903314	BP	regulation of nitrogen cycle metabolic process	1	1	0.0144521	KIRC
GO:1905693	BP	regulation of phosphatidic acid biosynthetic process	1	1	0.0144521	KIRC
GO:1905695	BP	positive regulation of phosphatidic acid biosynthetic process	1	1	0.0144521	KIRC
GO:2000213	BP	positive regulation of glutamate metabolic process	1	1	0.0144521	KIRC
GO:2001248	BP	regulation of ammonia assimilation cycle	1	1	0.0144521	KIRC
GO:2001250	BP	positive regulation of ammonia assimilation cycle	1	1	0.0144521	KIRC
GO:0035050	BP	embryonic heart tube development	83	8	0.0144679	KIRC
GO:0015166	MF	polyol transmembrane transporter activity	11	2	0.0144935	KIRC
GO:0030395	MF	lactose binding	1	1	0.0145106	KIRC
GO:0106347	MF	U2 snRNA 2'-O-methyladenosine m6 methyltransferase activity	1	1	0.0145764	KIRC
GO:0014070	BP	response to organic cyclic compound	893	41	0.0145768	KIRC
GO:0004773	MF	steryl-sulfatase activity	1	1	0.0145804	KIRC
GO:0120040	BP	regulation of macrophage proliferation	8	2	0.0146012	KIRC
GO:0033791	MF	3alpha,7alpha,12alpha-trihydroxy-5beta-cholestanoyl-CoA 24-hydroxylase activity	1	1	0.014753	KIRC
GO:0034366	CC	spherical high-density lipoprotein particle	8	2	0.0147926	KIRC
GO:0003096	BP	renal sodium ion transport	13	3	0.0147931	KIRC
GO:0008681	MF	2-octaprenyl-6-methoxyphenol hydroxylase activity	1	1	0.0148477	KIRC
GO:0106364	MF	4-hydroxy-3-all-trans-hexaprenylbenzoate oxygenase activity	1	1	0.0148477	KIRC
GO:0003235	BP	sinus venosus development	1	1	0.0148495	KIRC
GO:0003236	BP	sinus venosus morphogenesis	1	1	0.0148495	KIRC
GO:0003259	BP	cardioblast anterior-lateral migration	1	1	0.0148495	KIRC
GO:0003260	BP	cardioblast migration	1	1	0.0148495	KIRC
GO:0003318	BP	cell migration to the midline involved in heart development	1	1	0.0148495	KIRC
GO:0042664	BP	negative regulation of endodermal cell fate specification	1	1	0.0148495	KIRC
GO:0060975	BP	cardioblast migration to the midline involved in heart field formation	1	1	0.0148495	KIRC
GO:0070368	BP	positive regulation of hepatocyte differentiation	1	1	0.0148495	KIRC
GO:2000656	BP	regulation of apolipoprotein binding	1	1	0.01485	KIRC
GO:2000657	BP	negative regulation of apolipoprotein binding	1	1	0.01485	KIRC
GO:0015250	MF	water channel activity	12	2	0.0150933	KIRC
GO:0006165	BP	nucleoside diphosphate phosphorylation	99	8	0.0151325	KIRC
GO:0098797	CC	plasma membrane protein complex	564	31	0.0151718	KIRC
GO:0070523	MF	11-beta-hydroxysteroid dehydrogenase (NAD+) activity	1	1	0.0152527	KIRC
GO:0004343	MF	glucosamine 6-phosphate N-acetyltransferase activity	1	1	0.0154277	KIRC
GO:0016052	BP	carbohydrate catabolic process	152	10	0.0159189	KIRC
GO:0061514	BP	interleukin-34-mediated signaling pathway	1	1	0.0159431	KIRC
GO:0008049	BP	male courtship behavior	1	1	0.0162615	KIRC
GO:0031420	MF	alkali metal ion binding	17	3	0.0166701	KIRC
GO:1903771	BP	positive regulation of beta-galactosidase activity	1	1	0.0167036	KIRC
GO:1905572	BP	ganglioside GM1 transport to membrane	1	1	0.0167036	KIRC
GO:1905574	MF	ganglioside GM2 binding	1	1	0.0167036	KIRC
GO:1905575	MF	ganglioside GM3 binding	1	1	0.0167036	KIRC
GO:1905577	MF	ganglioside GP1c binding	1	1	0.0167036	KIRC
GO:0010640	BP	regulation of platelet-derived growth factor receptor signaling pathway	24	4	0.016816	KIRC
GO:0002281	BP	macrophage activation involved in immune response	19	3	0.016824	KIRC
GO:0046939	BP	nucleotide phosphorylation	101	8	0.0168262	KIRC
GO:0014823	BP	response to activity	70	6	0.0173677	KIRC
GO:0030695	MF	GTPase regulator activity	455	27	0.0173965	KIRC
GO:0060589	MF	nucleoside-triphosphatase regulator activity	455	27	0.0173965	KIRC
GO:0016495	MF	C-X3-C chemokine receptor activity	1	1	0.017425	KIRC
GO:0150089	BP	multiple spine synapse organization	1	1	0.017425	KIRC
GO:0150090	BP	multiple spine synapse organization, single dendrite	1	1	0.017425	KIRC
GO:1904150	BP	negative regulation of microglial cell mediated cytotoxicity	1	1	0.017425	KIRC
GO:0045851	BP	pH reduction	4	2	0.0175666	KIRC
GO:2000587	BP	negative regulation of platelet-derived growth factor receptor-beta signaling pathway	4	2	0.0176473	KIRC
GO:0008217	BP	regulation of blood pressure	188	12	0.0179741	KIRC
GO:0010832	BP	negative regulation of myotube differentiation	15	3	0.0179775	KIRC
GO:0097529	BP	myeloid leukocyte migration	231	12	0.0181318	KIRC
GO:0008556	MF	P-type potassium transmembrane transporter activity	8	2	0.0181639	KIRC
GO:0035605	MF	peptidyl-cysteine S-nitrosylase activity	1	1	0.0183229	KIRC
GO:0015293	MF	symporter activity	144	10	0.0184075	KIRC
GO:0005765	CC	lysosomal membrane	406	20	0.0185009	KIRC
GO:0098852	CC	lytic vacuole membrane	406	20	0.0185009	KIRC
GO:0048878	BP	chemical homeostasis	1039	44	0.0185066	KIRC
GO:1901700	BP	response to oxygen-containing compound	1640	68	0.0186076	KIRC
GO:0017125	MF	deoxycytidyl transferase activity	1	1	0.0188196	KIRC
GO:0090188	BP	negative regulation of pancreatic juice secretion	4	2	0.0189214	KIRC
GO:0090240	BP	positive regulation of histone H4 acetylation	7	2	0.0190981	KIRC
GO:0097574	CC	lateral part of cell	5	2	0.019154	KIRC
GO:0003143	BP	embryonic heart tube morphogenesis	70	7	0.0191854	KIRC
GO:1902531	BP	regulation of intracellular signal transduction	1718	71	0.0192308	KIRC
GO:0003097	BP	renal water transport	8	2	0.0192355	KIRC
GO:0030136	CC	clathrin-coated vesicle	204	12	0.0193127	KIRC
GO:0031588	CC	nucleotide-activated protein kinase complex	9	2	0.0193866	KIRC
GO:0022890	MF	inorganic cation transmembrane transporter activity	591	30	0.0195436	KIRC
GO:0140346	MF	phosphatidylserine flippase activity	5	2	0.0195718	KIRC
GO:0010642	BP	negative regulation of platelet-derived growth factor receptor signaling pathway	13	3	0.0196885	KIRC
GO:0099738	CC	cell cortex region	39	5	0.0200789	KIRC
GO:1905517	BP	macrophage migration	60	5	0.020256	KIRC
GO:0010876	BP	lipid localization	477	22	0.0204353	KIRC
GO:0034138	BP	toll-like receptor 3 signaling pathway	18	3	0.0205417	KIRC
GO:0004679	MF	AMP-activated protein kinase activity	8	2	0.0211653	KIRC
GO:1905523	BP	positive regulation of macrophage migration	26	3	0.0211751	KIRC
GO:0040007	BP	growth	902	45	0.0215939	KIRC
GO:0006869	BP	lipid transport	429	20	0.0216635	KIRC
GO:1901257	BP	negative regulation of macrophage colony-stimulating factor production	2	1	0.0217088	KIRC
GO:0031362	CC	anchored component of external side of plasma membrane	19	3	0.0217249	KIRC
GO:0005615	CC	extracellular space	3273	106	0.0219448	KIRC
GO:0043313	BP	regulation of neutrophil degranulation	8	2	0.0220596	KIRC
GO:0045651	BP	positive regulation of macrophage differentiation	16	3	0.0220928	KIRC
GO:0046034	BP	ATP metabolic process	205	11	0.0222928	KIRC
GO:0051453	BP	regulation of intracellular pH	83	6	0.0224569	KIRC
GO:0042026	BP	protein refolding	27	3	0.0224728	KIRC
GO:0000221	CC	vacuolar proton-transporting V-type ATPase, V1 domain	11	2	0.0228252	KIRC
GO:0033180	CC	proton-transporting V-type ATPase, V1 domain	11	2	0.0228252	KIRC
GO:0097530	BP	granulocyte migration	150	8	0.022831	KIRC
GO:0036301	BP	macrophage colony-stimulating factor production	7	2	0.0229371	KIRC
GO:1901256	BP	regulation of macrophage colony-stimulating factor production	7	2	0.0229371	KIRC
GO:0060023	BP	soft palate development	5	2	0.0231322	KIRC
GO:0031402	MF	sodium ion binding	7	2	0.0231323	KIRC
GO:0007368	BP	determination of left/right symmetry	126	9	0.0231364	KIRC
GO:0002887	BP	negative regulation of myeloid leukocyte mediated immunity	12	2	0.0232549	KIRC
GO:0034136	BP	negative regulation of toll-like receptor 2 signaling pathway	6	2	0.0233175	KIRC
GO:0034364	CC	high-density lipoprotein particle	27	3	0.0234377	KIRC
GO:0006583	BP	melanin biosynthetic process from tyrosine	2	1	0.0234418	KIRC
GO:0042625	MF	ATPase-coupled ion transmembrane transporter activity	24	3	0.0236566	KIRC
GO:0044769	MF	ATPase activity, coupled to transmembrane movement of ions, rotational mechanism	24	3	0.0236566	KIRC
GO:0046961	MF	proton-transporting ATPase activity, rotational mechanism	24	3	0.0236566	KIRC
GO:0043795	MF	glyceraldehyde oxidoreductase activity	1	1	0.0237655	KIRC
GO:0001558	BP	regulation of cell growth	415	24	0.0237956	KIRC
GO:1903720	BP	negative regulation of I-kappaB phosphorylation	2	1	0.0237962	KIRC
GO:0016471	CC	vacuolar proton-transporting V-type ATPase complex	25	3	0.0238568	KIRC
GO:0009132	BP	nucleoside diphosphate metabolic process	131	9	0.0239915	KIRC
GO:0047805	MF	cytidylate cyclase activity	1	1	0.0240269	KIRC
GO:0048871	BP	multicellular organismal homeostasis	527	27	0.0241925	KIRC
GO:0046794	BP	transport of virus	22	3	0.0242849	KIRC
GO:0006560	BP	proline metabolic process	10	2	0.0242893	KIRC
GO:0042149	BP	cellular response to glucose starvation	52	5	0.0243334	KIRC
GO:0006349	BP	regulation of gene expression by genomic imprinting	17	3	0.0243892	KIRC
GO:0002856	BP	negative regulation of natural killer cell mediated immune response to tumor cell	2	1	0.024606	KIRC
GO:0002859	BP	negative regulation of natural killer cell mediated cytotoxicity directed against tumor cell target	2	1	0.024606	KIRC
GO:2000649	BP	regulation of sodium ion transmembrane transporter activity	59	6	0.024636	KIRC
GO:0071731	BP	response to nitric oxide	21	3	0.024668	KIRC
GO:0048030	MF	disaccharide binding	2	1	0.0247125	KIRC
GO:0004633	MF	phosphopantothenoylcysteine decarboxylase activity	1	1	0.0247919	KIRC
GO:0071513	CC	phosphopantothenoylcysteine decarboxylase complex	1	1	0.0247919	KIRC
GO:1905521	BP	regulation of macrophage migration	44	4	0.0248891	KIRC
GO:0010762	BP	regulation of fibroblast migration	40	5	0.0250189	KIRC
GO:0034145	BP	positive regulation of toll-like receptor 4 signaling pathway	12	2	0.0251994	KIRC
GO:0060957	BP	endocardial cell fate commitment	1	1	0.0255024	KIRC
GO:0061445	BP	endocardial cushion cell fate commitment	1	1	0.0255024	KIRC
GO:0065009	BP	regulation of molecular function	2999	114	0.0257614	KIRC
GO:0061714	MF	folic acid receptor activity	2	1	0.0258079	KIRC
GO:0071231	BP	cellular response to folic acid	2	1	0.0258079	KIRC
GO:0035461	BP	vitamin transmembrane transport	20	3	0.0259041	KIRC
GO:0030593	BP	neutrophil chemotaxis	101	6	0.0259629	KIRC
GO:0055103	MF	ligase regulator activity	1	1	0.0260231	KIRC
GO:1990092	BP	calcium-dependent self proteolysis	1	1	0.0260231	KIRC
GO:0002028	BP	regulation of sodium ion transport	91	8	0.0264346	KIRC
GO:0004657	MF	proline dehydrogenase activity	2	1	0.0264893	KIRC
GO:0019852	BP	L-ascorbic acid metabolic process	9	2	0.0266098	KIRC
GO:1901334	BP	lactone metabolic process	9	2	0.0266098	KIRC
GO:0052695	BP	cellular glucuronidation	16	2	0.0268875	KIRC
GO:0007338	BP	single fertilization	154	8	0.0269237	KIRC
GO:0015247	MF	aminophospholipid flippase activity	7	2	0.027006	KIRC
GO:0140331	BP	aminophospholipid translocation	7	2	0.027006	KIRC
GO:0050660	MF	flavin adenine dinucleotide binding	87	6	0.0272418	KIRC
GO:0046086	BP	adenosine biosynthetic process	1	1	0.0272892	KIRC
GO:0042594	BP	response to starvation	205	12	0.0273506	KIRC
GO:0045178	CC	basal part of cell	269	16	0.027395	KIRC
GO:0103046	MF	alanylglutamate dipeptidase activity	1	1	0.0276239	KIRC
GO:0016323	CC	basolateral plasma membrane	226	14	0.0278456	KIRC
GO:0009007	MF	site-specific DNA-methyltransferase (adenine-specific) activity	2	1	0.0279119	KIRC
GO:0032775	BP	DNA methylation on adenine	2	1	0.0279119	KIRC
GO:0046873	MF	metal ion transmembrane transporter activity	431	24	0.0281919	KIRC
GO:0002017	BP	regulation of blood volume by renal aldosterone	2	1	0.0284069	KIRC
GO:0008324	MF	cation transmembrane transporter activity	640	31	0.0284363	KIRC
GO:0009008	MF	DNA-methyltransferase activity	6	2	0.0284588	KIRC
GO:0060071	BP	Wnt signaling pathway, planar cell polarity pathway	53	6	0.0285619	KIRC
GO:0043648	BP	dicarboxylic acid metabolic process	94	6	0.0286027	KIRC
GO:0045927	BP	positive regulation of growth	252	16	0.0288669	KIRC
GO:0033176	CC	proton-transporting V-type ATPase complex	27	3	0.0289268	KIRC
GO:2000521	BP	negative regulation of immunological synapse formation	2	1	0.0290616	KIRC
GO:0099631	CC	postsynaptic endocytic zone cytoplasmic component	2	1	0.0290672	KIRC
GO:1900110	BP	negative regulation of histone H3-K9 dimethylation	2	1	0.0291218	KIRC
GO:0045636	BP	positive regulation of melanocyte differentiation	5	2	0.0291749	KIRC
GO:0016049	BP	cell growth	486	27	0.0291917	KIRC
GO:0006954	BP	inflammatory response	816	30	0.0292752	KIRC
GO:0007528	BP	neuromuscular junction development	48	5	0.0295215	KIRC
GO:0032632	BP	interleukin-3 production	2	1	0.0295823	KIRC
GO:0032672	BP	regulation of interleukin-3 production	2	1	0.0295823	KIRC
GO:0051148	BP	negative regulation of muscle cell differentiation	68	6	0.0297148	KIRC
GO:0005355	MF	glucose transmembrane transporter activity	24	3	0.0297176	KIRC
GO:0015149	MF	hexose transmembrane transporter activity	24	3	0.0297176	KIRC
GO:0018107	BP	peptidyl-threonine phosphorylation	110	9	0.0297511	KIRC
GO:0043020	CC	NADPH oxidase complex	14	2	0.0297526	KIRC
GO:0003845	MF	11-beta-hydroxysteroid dehydrogenase [NAD(P)] activity	2	1	0.0297705	KIRC
GO:0090186	BP	regulation of pancreatic juice secretion	7	2	0.0298329	KIRC
GO:0051091	BP	positive regulation of DNA-binding transcription factor activity	264	15	0.0298734	KIRC
GO:0002221	BP	pattern recognition receptor signaling pathway	182	10	0.030263	KIRC
GO:1905379	CC	beta-N-acetylhexosaminidase complex	2	1	0.0304466	KIRC
GO:0030184	MF	nitric oxide transmembrane transporter activity	1	1	0.0304717	KIRC
GO:0072020	BP	proximal straight tubule development	1	1	0.0304717	KIRC
GO:0072022	BP	descending thin limb development	1	1	0.0304717	KIRC
GO:0072032	BP	proximal convoluted tubule segment 2 development	1	1	0.0304717	KIRC
GO:0072220	BP	metanephric descending thin limb development	1	1	0.0304717	KIRC
GO:0072230	BP	metanephric proximal straight tubule development	1	1	0.0304717	KIRC
GO:0072232	BP	metanephric proximal convoluted tubule segment 2 development	1	1	0.0304717	KIRC
GO:0009855	BP	determination of bilateral symmetry	135	9	0.0306273	KIRC
GO:0097718	MF	disordered domain specific binding	33	4	0.0307031	KIRC
GO:1990590	CC	ATF1-ATF4 transcription factor complex	2	1	0.0307302	KIRC
GO:2000027	BP	regulation of animal organ morphogenesis	128	11	0.0308132	KIRC
GO:0061312	BP	BMP signaling pathway involved in heart development	7	2	0.0311649	KIRC
GO:0000022	BP	mitotic spindle elongation	12	2	0.0314288	KIRC
GO:0062094	BP	stomach development	5	2	0.0314363	KIRC
GO:0045177	CC	apical part of cell	429	21	0.032172	KIRC
GO:0051146	BP	striated muscle cell differentiation	291	18	0.0323724	KIRC
GO:0003714	MF	transcription corepressor activity	183	12	0.0326495	KIRC
GO:0098552	CC	side of membrane	577	26	0.0326574	KIRC
GO:0005890	CC	sodium:potassium-exchanging ATPase complex	12	2	0.032909	KIRC
GO:0009799	BP	specification of symmetry	136	9	0.0330013	KIRC
GO:1902490	BP	regulation of sperm capacitation	2	1	0.0330498	KIRC
GO:0016328	CC	lateral plasma membrane	64	6	0.0331371	KIRC
GO:0043312	BP	neutrophil degranulation	11	2	0.0332835	KIRC
GO:0002690	BP	positive regulation of leukocyte chemotaxis	93	6	0.0334926	KIRC
GO:0061083	BP	regulation of protein refolding	2	1	0.0335482	KIRC
GO:0061084	BP	negative regulation of protein refolding	2	1	0.0335482	KIRC
GO:0032783	CC	super elongation complex	7	2	0.0336	KIRC
GO:1903512	BP	phytanic acid metabolic process	2	1	0.0337139	KIRC
GO:0009925	CC	basal plasma membrane	251	15	0.0337244	KIRC
GO:0005372	MF	water transmembrane transporter activity	15	2	0.033755	KIRC
GO:0033240	BP	positive regulation of cellular amine metabolic process	9	2	0.033859	KIRC
GO:0036130	MF	prostaglandin H2 endoperoxidase reductase activity	2	1	0.034068	KIRC
GO:0120116	BP	glucagon processing	1	1	0.0341068	KIRC
GO:0016922	MF	nuclear receptor binding	138	9	0.0342395	KIRC
GO:0043502	BP	regulation of muscle adaptation	97	7	0.0342512	KIRC
GO:0016925	BP	protein sumoylation	60	5	0.0343308	KIRC
GO:0070530	MF	K63-linked polyubiquitin modification-dependent protein binding	24	3	0.0344515	KIRC
GO:0045499	MF	chemorepellent activity	28	4	0.0344581	KIRC
GO:0098771	BP	inorganic ion homeostasis	606	27	0.0344597	KIRC
GO:1900221	BP	regulation of amyloid-beta clearance	20	3	0.0345643	KIRC
GO:0001947	BP	heart looping	64	6	0.0345875	KIRC
GO:0010506	BP	regulation of autophagy	339	17	0.0345913	KIRC
GO:0071222	BP	cellular response to lipopolysaccharide	211	11	0.0346169	KIRC
GO:0001881	BP	receptor recycling	33	4	0.0347591	KIRC
GO:0090175	BP	regulation of establishment of planar polarity	57	6	0.034887	KIRC
GO:0042626	MF	ATPase-coupled transmembrane transporter activity	98	7	0.0349816	KIRC
GO:0008375	MF	acetylglucosaminyltransferase activity	41	4	0.0351914	KIRC
GO:0001710	BP	mesodermal cell fate commitment	18	3	0.0354033	KIRC
GO:0070488	BP	neutrophil aggregation	2	1	0.0356298	KIRC
GO:0015020	MF	glucuronosyltransferase activity	29	3	0.0356919	KIRC
GO:0010232	BP	vascular transport	87	7	0.0357924	KIRC
GO:0150104	BP	transport across blood-brain barrier	87	7	0.0357924	KIRC
GO:0030307	BP	positive regulation of cell growth	162	11	0.0358435	KIRC
GO:0055081	BP	anion homeostasis	49	5	0.035962	KIRC
GO:0060348	BP	bone development	229	15	0.0359719	KIRC
GO:0015014	BP	heparan sulfate proteoglycan biosynthetic process, polysaccharide chain biosynthetic process	8	2	0.035973	KIRC
GO:0014902	BP	myotube differentiation	127	10	0.0364074	KIRC
GO:0032026	BP	response to magnesium ion	19	3	0.0364494	KIRC
GO:0120182	BP	regulation of focal adhesion disassembly	6	2	0.0366025	KIRC
GO:0120183	BP	positive regulation of focal adhesion disassembly	6	2	0.0366025	KIRC
GO:0031663	BP	lipopolysaccharide-mediated signaling pathway	61	5	0.0366416	KIRC
GO:0003210	BP	cardiac atrium formation	2	1	0.036688	KIRC
GO:0015917	BP	aminophospholipid transport	9	2	0.0366894	KIRC
GO:0032395	MF	MHC class II receptor activity	9	2	0.0368718	KIRC
GO:0009205	BP	purine ribonucleoside triphosphate metabolic process	229	11	0.0369311	KIRC
GO:0090100	BP	positive regulation of transmembrane receptor protein serine/threonine kinase signaling pathway	121	9	0.0369431	KIRC
GO:0042592	BP	homeostatic process	1670	65	0.0372908	KIRC
GO:1905832	BP	positive regulation of spindle assembly	8	2	0.0373013	KIRC
GO:0050942	BP	positive regulation of pigment cell differentiation	7	2	0.0374356	KIRC
GO:0045764	BP	positive regulation of cellular amino acid metabolic process	2	1	0.0374558	KIRC
GO:0032703	BP	negative regulation of interleukin-2 production	26	3	0.0374609	KIRC
GO:0017053	CC	transcription repressor complex	77	7	0.0375877	KIRC
GO:0004167	MF	dopachrome isomerase activity	3	1	0.0375988	KIRC
GO:0150117	BP	positive regulation of cell-substrate junction organization	31	4	0.0376648	KIRC
GO:0060218	BP	hematopoietic stem cell differentiation	35	4	0.0378052	KIRC
GO:0062208	BP	positive regulation of pattern recognition receptor signaling pathway	45	4	0.0378554	KIRC
GO:0001741	CC	XY body	14	2	0.0379244	KIRC
GO:0031113	BP	regulation of microtubule polymerization	53	5	0.0379649	KIRC
GO:0046966	MF	nuclear thyroid hormone receptor binding	29	3	0.038084	KIRC
GO:0070366	BP	regulation of hepatocyte differentiation	2	1	0.0383364	KIRC
GO:0006909	BP	phagocytosis	238	13	0.0383996	KIRC
GO:0008520	MF	L-ascorbate:sodium symporter activity	2	1	0.0384423	KIRC
GO:0030122	CC	AP-2 adaptor complex	7	2	0.0386624	KIRC
GO:0043500	BP	muscle adaptation	122	8	0.0388185	KIRC
GO:0033233	BP	regulation of protein sumoylation	23	3	0.0388425	KIRC
GO:0002652	BP	regulation of tolerance induction dependent upon immune response	3	1	0.0388727	KIRC
GO:0032050	MF	clathrin heavy chain binding	10	2	0.0389038	KIRC
GO:0042481	BP	regulation of odontogenesis	17	3	0.0389389	KIRC
GO:0032024	BP	positive regulation of insulin secretion	68	6	0.0390032	KIRC
GO:0010866	BP	regulation of triglyceride biosynthetic process	22	3	0.0390417	KIRC
GO:0005905	CC	clathrin-coated pit	71	6	0.0390917	KIRC
GO:0032025	BP	response to cobalt ion	10	2	0.03915	KIRC
GO:0070821	CC	tertiary granule membrane	71	5	0.0393028	KIRC
GO:0036449	CC	microtubule minus-end	7	2	0.0394989	KIRC
GO:0051231	BP	spindle elongation	14	2	0.0398154	KIRC
GO:0120180	BP	cell-substrate junction disassembly	7	2	0.0398188	KIRC
GO:0120181	BP	focal adhesion disassembly	7	2	0.0398188	KIRC
GO:0032611	BP	interleukin-1 beta production	108	6	0.0400796	KIRC
GO:0032651	BP	regulation of interleukin-1 beta production	108	6	0.0400796	KIRC
GO:0004903	MF	growth hormone receptor activity	1	1	0.0400856	KIRC
GO:0070195	CC	growth hormone receptor complex	1	1	0.0400856	KIRC
GO:0045936	BP	negative regulation of phosphate metabolic process	429	22	0.0400943	KIRC
GO:0032715	BP	negative regulation of interleukin-6 production	66	4	0.0401596	KIRC
GO:2000017	BP	positive regulation of determination of dorsal identity	2	1	0.0402625	KIRC
GO:0071725	BP	response to triacyl bacterial lipopeptide	3	1	0.0402883	KIRC
GO:0071727	BP	cellular response to triacyl bacterial lipopeptide	3	1	0.0402883	KIRC
GO:0031664	BP	regulation of lipopolysaccharide-mediated signaling pathway	26	3	0.0403348	KIRC
GO:0010563	BP	negative regulation of phosphorus metabolic process	430	22	0.0406321	KIRC
GO:0046032	BP	ADP catabolic process	2	1	0.0406661	KIRC
GO:0060242	BP	contact inhibition	9	2	0.0406695	KIRC
GO:0019221	BP	cytokine-mediated signaling pathway	464	18	0.040684	KIRC
GO:0014718	BP	positive regulation of satellite cell activation involved in skeletal muscle regeneration	2	1	0.0406955	KIRC
GO:0004365	MF	glyceraldehyde-3-phosphate dehydrogenase (NAD+) (phosphorylating) activity	2	1	0.0408529	KIRC
GO:0043891	MF	glyceraldehyde-3-phosphate dehydrogenase (NAD(P)+) (phosphorylating) activity	2	1	0.0408529	KIRC
GO:0006972	BP	hyperosmotic response	28	3	0.0408727	KIRC
GO:0008260	MF	3-oxoacid CoA-transferase activity	1	1	0.0409148	KIRC
GO:0106424	MF	succinyl-CoA 3-ketoacid-CoA transferase activity	1	1	0.0409148	KIRC
GO:1901505	MF	carbohydrate derivative transmembrane transporter activity	53	4	0.0409239	KIRC
GO:0016491	MF	oxidoreductase activity	702	25	0.0409453	KIRC
GO:0015812	BP	gamma-aminobutyric acid transport	18	3	0.0409468	KIRC
GO:2001189	BP	negative regulation of T cell activation via T cell receptor contact with antigen bound to MHC molecule on antigen presenting cell	3	1	0.0409544	KIRC
GO:0047956	MF	glycerol dehydrogenase [NADP+] activity	2	1	0.0410237	KIRC
GO:1990042	MF	glycerol dehydrogenase [NAD(P)+] activity	2	1	0.0410237	KIRC
GO:0008643	BP	carbohydrate transport	152	9	0.0410926	KIRC
GO:0042663	BP	regulation of endodermal cell fate specification	2	1	0.0411292	KIRC
GO:0051180	BP	vitamin transport	47	4	0.0411941	KIRC
GO:0060243	BP	negative regulation of cell growth involved in contact inhibition	1	1	0.041211	KIRC
GO:0071219	BP	cellular response to molecule of bacterial origin	223	11	0.041351	KIRC
GO:0034444	BP	regulation of plasma lipoprotein oxidation	2	1	0.041673	KIRC
GO:0034445	BP	negative regulation of plasma lipoprotein oxidation	2	1	0.041673	KIRC
GO:0061912	BP	selective autophagy	82	6	0.0417227	KIRC
GO:0031531	MF	thyrotropin-releasing hormone receptor binding	3	1	0.0418614	KIRC
GO:0001843	BP	neural tube closure	92	8	0.0420153	KIRC
GO:1904929	MF	coreceptor activity involved in Wnt signaling pathway, planar cell polarity pathway	6	2	0.0420497	KIRC
GO:1902305	BP	regulation of sodium ion transmembrane transport	68	6	0.0420627	KIRC
GO:0002688	BP	regulation of leukocyte chemotaxis	121	7	0.0421215	KIRC
GO:0035370	CC	UBC13-UEV1A complex	2	1	0.0421361	KIRC
GO:0031372	CC	UBC13-MMS2 complex	2	1	0.0421363	KIRC
GO:0055080	BP	cation homeostasis	591	26	0.0422512	KIRC
GO:0032502	BP	developmental process	6306	226	0.042321	KIRC
GO:0009267	BP	cellular response to starvation	169	10	0.0424282	KIRC
GO:0032640	BP	tumor necrosis factor production	179	9	0.0424864	KIRC
GO:0032680	BP	regulation of tumor necrosis factor production	179	9	0.0424864	KIRC
GO:0043395	MF	heparan sulfate proteoglycan binding	18	3	0.0425929	KIRC
GO:1990573	BP	potassium ion import across plasma membrane	49	5	0.0426268	KIRC
GO:0046370	BP	fructose biosynthetic process	2	1	0.042687	KIRC
GO:0150146	BP	cell junction disassembly	23	3	0.042752	KIRC
GO:0009144	BP	purine nucleoside triphosphate metabolic process	234	11	0.0427742	KIRC
GO:0045634	BP	regulation of melanocyte differentiation	6	2	0.0428404	KIRC
GO:0010803	BP	regulation of tumor necrosis factor-mediated signaling pathway	55	4	0.0429425	KIRC
GO:0048041	BP	focal adhesion assembly	85	8	0.0429611	KIRC
GO:1903719	BP	regulation of I-kappaB phosphorylation	9	2	0.042999	KIRC
GO:0050801	BP	ion homeostasis	616	27	0.0430023	KIRC
GO:0032707	BP	negative regulation of interleukin-23 production	2	1	0.0431114	KIRC
GO:0060606	BP	tube closure	93	8	0.0431742	KIRC
GO:0034365	CC	discoidal high-density lipoprotein particle	2	1	0.0435116	KIRC
GO:0035378	BP	carbon dioxide transmembrane transport	2	1	0.0438893	KIRC
GO:0035379	MF	carbon dioxide transmembrane transporter activity	2	1	0.0438893	KIRC
GO:0031666	BP	positive regulation of lipopolysaccharide-mediated signaling pathway	10	2	0.044029	KIRC
GO:1901654	BP	response to ketone	199	12	0.0441071	KIRC
GO:0035915	BP	pore formation in membrane of another organism	2	1	0.0441446	KIRC
GO:0034358	CC	plasma lipoprotein particle	36	3	0.0441716	KIRC
GO:1990777	CC	lipoprotein particle	36	3	0.0441716	KIRC
GO:0042826	MF	histone deacetylase binding	120	8	0.0442168	KIRC
GO:0016281	CC	eukaryotic translation initiation factor 4F complex	12	2	0.0442811	KIRC
GO:0060245	BP	detection of cell density	10	2	0.044439	KIRC
GO:0034971	BP	histone H3-R17 methylation	3	1	0.0446084	KIRC
GO:0046621	BP	negative regulation of organ growth	38	4	0.0446117	KIRC
GO:0061371	BP	determination of heart left/right asymmetry	69	6	0.044642	KIRC
GO:0004142	MF	diacylglycerol cholinephosphotransferase activity	3	1	0.0447349	KIRC
GO:0005507	MF	copper ion binding	59	4	0.0447353	KIRC
GO:0051452	BP	intracellular pH reduction	50	4	0.0447676	KIRC
GO:0032496	BP	response to lipopolysaccharide	327	15	0.0447867	KIRC
GO:0005157	MF	macrophage colony-stimulating factor receptor binding	3	1	0.0448123	KIRC
GO:0008511	MF	sodium:potassium:chloride symporter activity	3	1	0.0448722	KIRC
GO:0009674	MF	potassium:sodium symporter activity	3	1	0.0448722	KIRC
GO:0019065	BP	receptor-mediated endocytosis of virus by host cell	11	2	0.0449846	KIRC
GO:0009199	BP	ribonucleoside triphosphate metabolic process	236	11	0.0450652	KIRC
GO:0150115	BP	cell-substrate junction organization	101	9	0.0453739	KIRC
GO:0016241	BP	regulation of macroautophagy	159	9	0.0455235	KIRC
GO:0071641	BP	negative regulation of macrophage inflammatory protein 1 alpha production	3	1	0.0455532	KIRC
GO:0042440	BP	pigment metabolic process	79	5	0.0456511	KIRC
GO:0090022	BP	regulation of neutrophil chemotaxis	33	3	0.0456686	KIRC
GO:0018210	BP	peptidyl-threonine modification	119	9	0.0459037	KIRC
GO:0090068	BP	positive regulation of cell cycle process	253	13	0.0459945	KIRC
GO:0030128	CC	clathrin coat of endocytic vesicle	8	2	0.046057	KIRC
GO:0072019	BP	proximal convoluted tubule development	2	1	0.0463194	KIRC
GO:0072229	BP	metanephric proximal convoluted tubule development	2	1	0.0463194	KIRC
GO:1902884	BP	positive regulation of response to oxidative stress	11	2	0.0468806	KIRC
GO:0045926	BP	negative regulation of growth	247	15	0.0469154	KIRC
GO:0061052	BP	negative regulation of cell growth involved in cardiac muscle cell development	13	2	0.0469215	KIRC
GO:0048087	BP	positive regulation of developmental pigmentation	9	2	0.0471045	KIRC
GO:0047961	MF	glycine N-acyltransferase activity	4	1	0.0473073	KIRC
GO:0048598	BP	embryonic morphogenesis	609	34	0.0474863	KIRC
GO:0019899	MF	enzyme binding	2031	79	0.0479617	KIRC
GO:0048856	BP	anatomical structure development	5767	211	0.0479795	KIRC
GO:0007035	BP	vacuolar acidification	33	3	0.0485482	KIRC
GO:0071706	BP	tumor necrosis factor superfamily cytokine production	184	9	0.0487928	KIRC
GO:1903555	BP	regulation of tumor necrosis factor superfamily cytokine production	184	9	0.0487928	KIRC
GO:0097242	BP	amyloid-beta clearance	39	4	0.0490075	KIRC
GO:0150014	CC	apical distal dendrite	1	1	0.0492133	KIRC
GO:0035821	BP	modulation of process of another organism	22	2	0.0495377	KIRC
GO:0098831	CC	presynaptic active zone cytoplasmic component	16	3	0.0498038	KIRC
GO:0005975	BP	carbohydrate metabolic process	578	25	0.049981	KIRC
GO:0001847	MF	opsonin receptor activity	4	1	0.0499943	KIRC

## Sheet: KIRP
ID	ONTOLOGY	TERM	N	DE	P.DE	Cancer
GO:0019783	MF	ubiquitin-like protein peptidase activity	104	7	9.73634e-05	KIRP
GO:0045472	BP	response to ether	11	3	0.000305673	KIRP
GO:0008234	MF	cysteine-type peptidase activity	161	8	0.000308873	KIRP
GO:0004843	MF	cysteine-type deubiquitinase activity	86	6	0.00031105	KIRP
GO:0101005	MF	deubiquitinase activity	91	6	0.000391592	KIRP
GO:0099612	BP	protein localization to axon	9	3	0.000529271	KIRP
GO:0007249	BP	I-kappaB kinase/NF-kappaB signaling	284	11	0.000646382	KIRP
GO:0004197	MF	cysteine-type endopeptidase activity	99	6	0.000777723	KIRP
GO:0007528	BP	neuromuscular junction development	48	5	0.000841148	KIRP
GO:0043122	BP	regulation of I-kappaB kinase/NF-kappaB signaling	251	10	0.000946066	KIRP
GO:0014005	BP	microglia development	4	2	0.000972319	KIRP
GO:0071560	BP	cellular response to transforming growth factor beta stimulus	264	12	0.00122087	KIRP
GO:0010647	BP	positive regulation of cell communication	1714	39	0.00141736	KIRP
GO:0071559	BP	response to transforming growth factor beta	270	12	0.00149856	KIRP
GO:0031466	CC	Cul5-RING ubiquitin ligase complex	8	2	0.00150484	KIRP
GO:0023056	BP	positive regulation of signaling	1718	39	0.00152087	KIRP
GO:0009211	BP	pyrimidine deoxyribonucleoside triphosphate metabolic process	6	2	0.00153822	KIRP
GO:0043123	BP	positive regulation of I-kappaB kinase/NF-kappaB signaling	187	8	0.0015627	KIRP
GO:0023051	BP	regulation of signaling	3358	67	0.0016351	KIRP
GO:0002175	BP	protein localization to paranode region of axon	4	2	0.00166359	KIRP
GO:0034138	BP	toll-like receptor 3 signaling pathway	18	3	0.00204072	KIRP
GO:0010646	BP	regulation of cell communication	3345	66	0.00234658	KIRP
GO:0014004	BP	microglia differentiation	6	2	0.00253804	KIRP
GO:1903844	BP	regulation of cellular response to transforming growth factor beta stimulus	146	8	0.00270179	KIRP
GO:0071362	BP	cellular response to ether	6	2	0.00303639	KIRP
GO:0031851	MF	kappa-type opioid receptor binding	1	1	0.00317109	KIRP
GO:0002264	BP	endothelial cell activation involved in immune response	1	1	0.00327815	KIRP
GO:0006690	BP	icosanoid metabolic process	112	5	0.00328957	KIRP
GO:0002317	BP	plasma cell differentiation	8	2	0.00330383	KIRP
GO:0016328	CC	lateral plasma membrane	64	5	0.00338498	KIRP
GO:0038107	BP	nodal signaling pathway involved in determination of left/right asymmetry	7	2	0.00346299	KIRP
GO:1900164	BP	nodal signaling pathway involved in determination of lateral mesoderm left/right asymmetry	7	2	0.00346299	KIRP
GO:0016579	BP	protein deubiquitination	135	6	0.00389353	KIRP
GO:0009967	BP	positive regulation of signal transduction	1524	34	0.00392369	KIRP
GO:0001772	CC	immunological synapse	45	4	0.00414063	KIRP
GO:0045121	CC	membrane raft	325	12	0.00415528	KIRP
GO:0098857	CC	membrane microdomain	326	12	0.00419072	KIRP
GO:0004502	MF	kynurenine 3-monooxygenase activity	1	1	0.00419453	KIRP
GO:0007159	BP	leukocyte cell-cell adhesion	400	12	0.00436544	KIRP
GO:0038101	BP	sequestering of nodal from receptor via nodal binding	1	1	0.00441449	KIRP
GO:0031257	CC	cell trailing edge membrane	1	1	0.00445337	KIRP
GO:0031259	CC	uropod membrane	1	1	0.00445337	KIRP
GO:0038123	BP	toll-like receptor TLR1:TLR2 signaling pathway	1	1	0.00445337	KIRP
GO:1902041	BP	regulation of extrinsic apoptotic signaling pathway via death domain receptors	50	4	0.00445393	KIRP
GO:0031594	CC	neuromuscular junction	68	5	0.00450694	KIRP
GO:0019911	MF	structural constituent of myelin sheath	9	2	0.00461162	KIRP
GO:0004773	MF	steryl-sulfatase activity	1	1	0.00466263	KIRP
GO:0003140	BP	determination of left/right asymmetry in lateral mesoderm	8	2	0.00466658	KIRP
GO:0032722	BP	positive regulation of chemokine production	70	4	0.00478739	KIRP
GO:0044828	BP	negative regulation by host of viral genome replication	8	2	0.00503347	KIRP
GO:0061630	MF	ubiquitin protein ligase activity	302	10	0.005097	KIRP
GO:0034389	BP	lipid droplet organization	31	3	0.00513876	KIRP
GO:0007271	BP	synaptic transmission, cholinergic	29	3	0.00548805	KIRP
GO:0010799	BP	regulation of peptidyl-threonine phosphorylation	45	4	0.00550662	KIRP
GO:0070646	BP	protein modification by small protein removal	153	6	0.00575768	KIRP
GO:2000320	BP	negative regulation of T-helper 17 cell differentiation	11	2	0.00594719	KIRP
GO:0140042	BP	lipid droplet formation	12	2	0.00602826	KIRP
GO:0042497	MF	triacyl lipopeptide binding	1	1	0.00605187	KIRP
GO:0032635	BP	interleukin-6 production	169	6	0.00618231	KIRP
GO:0032675	BP	regulation of interleukin-6 production	169	6	0.00618231	KIRP
GO:0002263	BP	cell activation involved in immune response	278	9	0.00622813	KIRP
GO:0051124	BP	synaptic assembly at neuromuscular junction	8	2	0.00630492	KIRP
GO:0061659	MF	ubiquitin-like protein ligase activity	313	10	0.0063577	KIRP
GO:0048318	BP	axial mesoderm development	9	2	0.00639496	KIRP
GO:2000317	BP	negative regulation of T-helper 17 type immune response	12	2	0.00654513	KIRP
GO:1901557	BP	response to fenofibrate	1	1	0.00664097	KIRP
GO:0042910	MF	xenobiotic transmembrane transporter activity	31	3	0.00679381	KIRP
GO:0006253	BP	dCTP catabolic process	1	1	0.00681343	KIRP
GO:0032556	MF	pyrimidine deoxyribonucleotide binding	1	1	0.00681343	KIRP
GO:0046065	BP	dCTP metabolic process	1	1	0.00681343	KIRP
GO:0047840	MF	dCTP diphosphatase activity	1	1	0.00681343	KIRP
GO:0009966	BP	regulation of signal transduction	2961	57	0.00689763	KIRP
GO:0038202	BP	TORC1 signaling	56	4	0.00692669	KIRP
GO:1902042	BP	negative regulation of extrinsic apoptotic signaling pathway via death domain receptors	31	3	0.00718141	KIRP
GO:0070374	BP	positive regulation of ERK1 and ERK2 cascade	215	8	0.00726586	KIRP
GO:1900273	BP	positive regulation of long-term synaptic potentiation	23	3	0.00744456	KIRP
GO:0022010	BP	central nervous system myelination	24	3	0.0074703	KIRP
GO:0032291	BP	axon ensheathment in central nervous system	24	3	0.0074703	KIRP
GO:0071363	BP	cellular response to growth factor stimulus	696	20	0.00755531	KIRP
GO:0070647	BP	protein modification by small protein conjugation or removal	981	21	0.00761244	KIRP
GO:0008625	BP	extrinsic apoptotic signaling pathway via death domain receptors	85	5	0.00769551	KIRP
GO:1900146	BP	negative regulation of nodal signaling pathway involved in determination of left/right asymmetry	2	1	0.00778037	KIRP
GO:1900176	BP	negative regulation of nodal signaling pathway involved in determination of lateral mesoderm left/right asymmetry	2	1	0.00778037	KIRP
GO:0090287	BP	regulation of cellular response to growth factor stimulus	329	12	0.00781099	KIRP
GO:0034275	BP	kynurenic acid metabolic process	2	1	0.0078648	KIRP
GO:0034276	BP	kynurenic acid biosynthetic process	2	1	0.0078648	KIRP
GO:0034612	BP	response to tumor necrosis factor	242	8	0.0080017	KIRP
GO:0070542	BP	response to fatty acid	63	4	0.00814931	KIRP
GO:0070936	BP	protein K48-linked ubiquitination	68	4	0.008335	KIRP
GO:0005892	CC	acetylcholine-gated channel complex	15	2	0.00851545	KIRP
GO:0044793	BP	negative regulation by host of viral process	13	2	0.00853338	KIRP
GO:0017015	BP	regulation of transforming growth factor beta receptor signaling pathway	143	7	0.00863725	KIRP
GO:0019787	MF	ubiquitin-like protein transferase activity	438	12	0.00863941	KIRP
GO:1905199	BP	manchette disassembly	1	1	0.00872651	KIRP
GO:0050691	BP	regulation of defense response to virus by host	42	3	0.00875517	KIRP
GO:0034142	BP	toll-like receptor 4 signaling pathway	39	3	0.00876023	KIRP
GO:0002285	BP	lymphocyte activation involved in immune response	189	7	0.00894364	KIRP
GO:0044304	CC	main axon	61	5	0.00953034	KIRP
GO:0005923	CC	bicellular tight junction	124	6	0.00970153	KIRP
GO:1900748	BP	positive regulation of vascular endothelial growth factor signaling pathway	7	2	0.00977071	KIRP
GO:0035354	CC	Toll-like receptor 1-Toll-like receptor 2 protein complex	2	1	0.00983681	KIRP
GO:0042495	BP	detection of triacyl bacterial lipopeptide	2	1	0.00983681	KIRP
GO:0002286	BP	T cell activation involved in immune response	104	5	0.0098621	KIRP
GO:0010800	BP	positive regulation of peptidyl-threonine phosphorylation	29	3	0.00992497	KIRP
GO:0005007	MF	fibroblast growth factor receptor activity	5	2	0.00993699	KIRP
GO:0005643	CC	nuclear pore	93	4	0.0102113	KIRP
GO:0016798	MF	hydrolase activity, acting on glycosyl bonds	121	5	0.0102814	KIRP
GO:1903971	BP	positive regulation of response to macrophage colony-stimulating factor	2	1	0.0103502	KIRP
GO:1903974	BP	positive regulation of cellular response to macrophage colony-stimulating factor stimulus	2	1	0.0103502	KIRP
GO:1904466	BP	positive regulation of matrix metallopeptidase secretion	2	1	0.0103502	KIRP
GO:0032268	BP	regulation of cellular protein metabolic process	12	2	0.0105412	KIRP
GO:0070412	MF	R-SMAD binding	24	3	0.0108103	KIRP
GO:0035355	CC	Toll-like receptor 2-Toll-like receptor 6 protein complex	2	1	0.0108426	KIRP
GO:0038124	BP	toll-like receptor TLR6:TLR2 signaling pathway	2	1	0.0108426	KIRP
GO:0042496	BP	detection of diacyl bacterial lipopeptide	2	1	0.0108426	KIRP
GO:0070848	BP	response to growth factor	725	20	0.0110789	KIRP
GO:0047800	MF	cysteamine dioxygenase activity	1	1	0.0111304	KIRP
GO:0007162	BP	negative regulation of cell adhesion	298	10	0.0113932	KIRP
GO:0019079	BP	viral genome replication	127	5	0.0114315	KIRP
GO:0050840	MF	extracellular matrix binding	56	4	0.0118918	KIRP
GO:0098737	BP	protein insertion into plasma membrane	1	1	0.0119563	KIRP
GO:0120003	CC	hinge region between urothelial plaques of apical plasma membrane	1	1	0.0119563	KIRP
GO:0070160	CC	tight junction	129	6	0.0119579	KIRP
GO:0051309	BP	female meiosis chromosome separation	2	1	0.0119951	KIRP
GO:0007567	BP	parturition	15	2	0.0121016	KIRP
GO:0050885	BP	neuromuscular process controlling balance	50	4	0.0121874	KIRP
GO:1900100	BP	positive regulation of plasma cell differentiation	3	1	0.0123828	KIRP
GO:0019882	BP	antigen processing and presentation	101	5	0.0125497	KIRP
GO:0006378	BP	mRNA polyadenylation	39	3	0.0128168	KIRP
GO:0032874	BP	positive regulation of stress-activated MAPK cascade	128	6	0.0128598	KIRP
GO:0038061	BP	NIK/NF-kappaB signaling	139	5	0.0131289	KIRP
GO:1902490	BP	regulation of sperm capacitation	2	1	0.013484	KIRP
GO:1990761	CC	growth cone lamellipodium	1	1	0.013575	KIRP
GO:2000673	BP	positive regulation of motor neuron apoptotic process	2	1	0.013941	KIRP
GO:0070304	BP	positive regulation of stress-activated protein kinase signaling cascade	130	6	0.0140078	KIRP
GO:1902533	BP	positive regulation of intracellular signal transduction	991	22	0.0141231	KIRP
GO:2000671	BP	regulation of motor neuron apoptotic process	15	2	0.0142215	KIRP
GO:1990724	CC	galectin complex	2	1	0.0143039	KIRP
GO:0004842	MF	ubiquitin-protein transferase activity	416	11	0.0144909	KIRP
GO:0070340	BP	detection of bacterial lipopeptide	3	1	0.0146094	KIRP
GO:2000319	BP	regulation of T-helper 17 cell differentiation	21	2	0.0147649	KIRP
GO:0051865	BP	protein autoubiquitination	80	4	0.0148976	KIRP
GO:0043420	BP	anthranilate metabolic process	3	1	0.0149352	KIRP
GO:0071725	BP	response to triacyl bacterial lipopeptide	3	1	0.015019	KIRP
GO:0071727	BP	cellular response to triacyl bacterial lipopeptide	3	1	0.015019	KIRP
GO:0002224	BP	toll-like receptor signaling pathway	118	5	0.0150953	KIRP
GO:0034329	BP	cell junction assembly	423	14	0.015173	KIRP
GO:0051092	BP	positive regulation of NF-kappaB transcription factor activity	153	6	0.0152325	KIRP
GO:2000347	BP	positive regulation of hepatocyte proliferation	10	2	0.0153717	KIRP
GO:0019369	BP	arachidonic acid metabolic process	52	3	0.0153944	KIRP
GO:0000266	BP	mitochondrial fission	40	3	0.0155442	KIRP
GO:0022407	BP	regulation of cell-cell adhesion	474	13	0.015567	KIRP
GO:0005847	CC	mRNA cleavage and polyadenylation specificity factor complex	15	2	0.0155858	KIRP
GO:0031462	CC	Cul2-RING ubiquitin ligase complex	22	2	0.0156211	KIRP
GO:0033130	MF	acetylcholine receptor binding	11	2	0.0156444	KIRP
GO:0001730	MF	2'-5'-oligoadenylate synthetase activity	3	1	0.0156671	KIRP
GO:0043631	BP	RNA polyadenylation	41	3	0.0157528	KIRP
GO:0001775	BP	cell activation	1040	22	0.0157742	KIRP
GO:0045947	BP	negative regulation of translational initiation	18	2	0.0160668	KIRP
GO:1903037	BP	regulation of leukocyte cell-cell adhesion	363	10	0.0160888	KIRP
GO:0090092	BP	regulation of transmembrane receptor protein serine/threonine kinase signaling pathway	284	10	0.0162547	KIRP
GO:0038092	BP	nodal signaling pathway	16	2	0.0162705	KIRP
GO:0061663	MF	NEDD8 ligase activity	3	1	0.0163493	KIRP
GO:0098815	BP	modulation of excitatory postsynaptic potential	44	4	0.0164298	KIRP
GO:0007179	BP	transforming growth factor beta receptor signaling pathway	211	8	0.0165571	KIRP
GO:0014841	BP	skeletal muscle satellite cell proliferation	14	2	0.0166028	KIRP
GO:0032642	BP	regulation of chemokine production	97	4	0.0166116	KIRP
GO:0046634	BP	regulation of alpha-beta T cell activation	110	5	0.0166439	KIRP
GO:0044827	BP	modulation by host of viral genome replication	22	2	0.0167237	KIRP
GO:0032602	BP	chemokine production	98	4	0.0168962	KIRP
GO:0006950	BP	response to stress	3782	58	0.0169153	KIRP
GO:0031941	CC	filamentous actin	29	3	0.0169916	KIRP
GO:0030291	MF	protein serine/threonine kinase inhibitor activity	33	3	0.0171696	KIRP
GO:0043297	BP	apical junction assembly	74	4	0.0171895	KIRP
GO:0002823	BP	negative regulation of adaptive immune response based on somatic recombination of immune receptors built from immunoglobulin superfamily domains	54	3	0.0172571	KIRP
GO:2000514	BP	regulation of CD4-positive, alpha-beta T cell activation	75	4	0.0173266	KIRP
GO:0002475	BP	antigen processing and presentation via MHC class Ib	13	2	0.017473	KIRP
GO:0031115	BP	negative regulation of microtubule polymerization	13	2	0.0174755	KIRP
GO:0033559	BP	unsaturated fatty acid metabolic process	106	4	0.0175192	KIRP
GO:0008233	MF	peptidase activity	551	12	0.0175715	KIRP
GO:0045622	BP	regulation of T-helper cell differentiation	43	3	0.0177394	KIRP
GO:0071659	BP	negative regulation of IP-10 production	4	1	0.0179213	KIRP
GO:0050729	BP	positive regulation of inflammatory response	150	5	0.01793	KIRP
GO:0034134	BP	toll-like receptor 2 signaling pathway	16	2	0.0179831	KIRP
GO:0048368	BP	lateral mesoderm development	15	2	0.0181731	KIRP
GO:0004512	MF	inositol-3-phosphate synthase activity	1	1	0.018251	KIRP
GO:0016872	MF	intramolecular lyase activity	1	1	0.018251	KIRP
GO:0048584	BP	positive regulation of response to stimulus	2134	39	0.0183117	KIRP
GO:0005829	CC	cytosol	5257	80	0.0186132	KIRP
GO:0002221	BP	pattern recognition receptor signaling pathway	181	6	0.0186719	KIRP
GO:0001534	CC	radial spoke	3	1	0.0186871	KIRP
GO:0120254	BP	olefinic compound metabolic process	152	5	0.0188361	KIRP
GO:1903900	BP	regulation of viral life cycle	140	5	0.0191632	KIRP
GO:0030246	MF	carbohydrate binding	254	7	0.0191868	KIRP
GO:0050806	BP	positive regulation of synaptic transmission	167	7	0.0193347	KIRP
GO:0016404	MF	15-hydroxyprostaglandin dehydrogenase (NAD+) activity	2	1	0.0193927	KIRP
GO:0035739	BP	CD4-positive, alpha-beta T cell proliferation	20	2	0.0194322	KIRP
GO:2000561	BP	regulation of CD4-positive, alpha-beta T cell proliferation	20	2	0.0194322	KIRP
GO:0019805	BP	quinolinate biosynthetic process	4	1	0.0194588	KIRP
GO:0048583	BP	regulation of response to stimulus	3899	66	0.01948	KIRP
GO:0002819	BP	regulation of adaptive immune response	188	6	0.0195532	KIRP
GO:1903893	BP	positive regulation of ATF6-mediated unfolded protein response	1	1	0.0195738	KIRP
GO:1901222	BP	regulation of NIK/NF-kappaB signaling	108	4	0.0196173	KIRP
GO:0047977	MF	hepoxilin-epoxide hydrolase activity	1	1	0.0196265	KIRP
GO:2001304	BP	lipoxin B4 metabolic process	1	1	0.0196265	KIRP
GO:2001306	BP	lipoxin B4 biosynthetic process	1	1	0.0196265	KIRP
GO:0009213	BP	pyrimidine deoxyribonucleoside triphosphate catabolic process	2	1	0.0199483	KIRP
GO:0051563	BP	smooth endoplasmic reticulum calcium ion homeostasis	2	1	0.0201969	KIRP
GO:0009147	BP	pyrimidine nucleoside triphosphate metabolic process	24	2	0.0202925	KIRP
GO:0098926	BP	postsynaptic signal transduction	37	3	0.0203964	KIRP
GO:0031091	CC	platelet alpha granule	87	4	0.0204615	KIRP
GO:0090152	BP	establishment of protein localization to mitochondrial membrane involved in mitochondrial fission	1	1	0.0207852	KIRP
GO:0005737	CC	cytoplasm	11502	153	0.0208495	KIRP
GO:0071226	BP	cellular response to molecule of fungal origin	4	1	0.0210196	KIRP
GO:0061043	BP	regulation of vascular wound healing	13	2	0.0211342	KIRP
GO:0051150	BP	regulation of smooth muscle cell differentiation	43	3	0.0212927	KIRP
GO:0072567	BP	chemokine (C-X-C motif) ligand 2 production	17	2	0.0213453	KIRP
GO:2000341	BP	regulation of chemokine (C-X-C motif) ligand 2 production	17	2	0.0213453	KIRP
GO:0002820	BP	negative regulation of adaptive immune response	57	3	0.0216211	KIRP
GO:0005849	CC	mRNA cleavage factor complex	19	2	0.0216537	KIRP
GO:0032872	BP	regulation of stress-activated MAPK cascade	191	7	0.0216744	KIRP
GO:0032755	BP	positive regulation of interleukin-6 production	98	4	0.0217773	KIRP
GO:0032444	CC	activin responsive factor complex	3	1	0.0217855	KIRP
GO:0019884	BP	antigen processing and presentation of exogenous antigen	44	3	0.0222876	KIRP
GO:0002940	BP	tRNA N2-guanine methylation	4	1	0.0224598	KIRP
GO:0015132	MF	prostaglandin transmembrane transporter activity	2	1	0.0225653	KIRP
GO:0016702	MF	oxidoreductase activity, acting on single donors with incorporation of molecular oxygen, incorporation of two atoms of oxygen	24	2	0.0226535	KIRP
GO:0052907	MF	23S rRNA (adenine(1618)-N(6))-methyltransferase activity	1	1	0.0227219	KIRP
GO:0120048	MF	U6 snRNA (adenine-(43)-N(6))-methyltransferase activity	1	1	0.0227219	KIRP
GO:1905869	BP	negative regulation of 3'-UTR-mediated mRNA stabilization	1	1	0.0227219	KIRP
GO:0090433	MF	palmitoyl-CoA ligase activity	3	1	0.0227865	KIRP
GO:0019915	BP	lipid storage	85	4	0.0228151	KIRP
GO:1904951	BP	positive regulation of establishment of protein localization	306	9	0.0229949	KIRP
GO:0001676	BP	long-chain fatty acid metabolic process	102	4	0.0230908	KIRP
GO:0045623	BP	negative regulation of T-helper cell differentiation	18	2	0.0231631	KIRP
GO:0006663	BP	platelet activating factor biosynthetic process	4	1	0.0233941	KIRP
GO:0097049	BP	motor neuron apoptotic process	21	2	0.0234413	KIRP
GO:0070302	BP	regulation of stress-activated protein kinase signaling cascade	194	7	0.0235441	KIRP
GO:0016701	MF	oxidoreductase activity, acting on single donors with incorporation of molecular oxygen	25	2	0.0236406	KIRP
GO:0046637	BP	regulation of alpha-beta T cell differentiation	73	4	0.0238044	KIRP
GO:0034147	BP	regulation of toll-like receptor 5 signaling pathway	1	1	0.0238436	KIRP
GO:0034148	BP	negative regulation of toll-like receptor 5 signaling pathway	1	1	0.0238436	KIRP
GO:0070429	BP	negative regulation of nucleotide-binding oligomerization domain containing 1 signaling pathway	1	1	0.0238436	KIRP
GO:0072573	BP	tolerance induction to lipopolysaccharide	1	1	0.0238436	KIRP
GO:0007043	BP	cell-cell junction assembly	148	6	0.0238753	KIRP
GO:0071724	BP	response to diacyl bacterial lipopeptide	5	1	0.0240129	KIRP
GO:0071726	BP	cellular response to diacyl bacterial lipopeptide	5	1	0.0240129	KIRP
GO:0002764	BP	immune response-regulating signaling pathway	406	10	0.0240797	KIRP
GO:0035613	MF	RNA stem-loop binding	16	2	0.0241348	KIRP
GO:0009219	BP	pyrimidine deoxyribonucleotide metabolic process	24	2	0.0242507	KIRP
GO:1901224	BP	positive regulation of NIK/NF-kappaB signaling	66	3	0.0242578	KIRP
GO:0071496	BP	cellular response to external stimulus	320	9	0.0243072	KIRP
GO:0046105	BP	thymidine biosynthetic process	2	1	0.0244161	KIRP
GO:0046120	BP	deoxyribonucleoside biosynthetic process	2	1	0.0244161	KIRP
GO:0046126	BP	pyrimidine deoxyribonucleoside biosynthetic process	2	1	0.0244161	KIRP
GO:0043296	CC	apical junction complex	147	6	0.0246637	KIRP
GO:0046874	BP	quinolinate metabolic process	5	1	0.0246901	KIRP
GO:0001933	BP	negative regulation of protein phosphorylation	331	10	0.0247255	KIRP
GO:0002693	BP	positive regulation of cellular extravasation	16	2	0.0249976	KIRP
GO:0004175	MF	endopeptidase activity	386	9	0.0252807	KIRP
GO:1903413	BP	cellular response to bile acid	5	1	0.0254924	KIRP
GO:0051607	BP	defense response to virus	283	7	0.0257091	KIRP
GO:0140546	BP	defense response to symbiont	284	7	0.0258864	KIRP
GO:0004809	MF	tRNA (guanine-N2-)-methyltransferase activity	4	1	0.0258995	KIRP
GO:0099518	BP	vesicle cytoskeletal trafficking	68	4	0.0260164	KIRP
GO:0002238	BP	response to molecule of fungal origin	5	1	0.0262923	KIRP
GO:0000049	MF	tRNA binding	72	3	0.0262938	KIRP
GO:0071612	BP	IP-10 production	5	1	0.0262981	KIRP
GO:0071658	BP	regulation of IP-10 production	5	1	0.0262981	KIRP
GO:0043181	BP	vacuolar sequestering	1	1	0.0263061	KIRP
GO:0120282	CC	autolysosome lumen	1	1	0.0263061	KIRP
GO:1905821	BP	positive regulation of chromosome condensation	5	1	0.0267283	KIRP
GO:0031124	BP	mRNA 3'-end processing	58	3	0.0267861	KIRP
GO:0034497	BP	protein localization to phagophore assembly site	17	2	0.0271557	KIRP
GO:2000345	BP	regulation of hepatocyte proliferation	15	2	0.0272168	KIRP
GO:0098529	BP	neuromuscular junction development, skeletal muscle fiber	1	1	0.027221	KIRP
GO:0030629	MF	U6 snRNA 3'-end binding	2	1	0.0274982	KIRP
GO:1903895	BP	negative regulation of IRE1-mediated unfolded protein response	5	1	0.0275859	KIRP
GO:0071262	BP	regulation of translational initiation in response to starvation	2	1	0.0276146	KIRP
GO:0071264	BP	positive regulation of translational initiation in response to starvation	2	1	0.0276146	KIRP
GO:0140469	BP	GCN2-mediated signaling	2	1	0.0276146	KIRP
GO:0106346	MF	snRNA methyltransferase activity	2	1	0.0276708	KIRP
GO:0120049	BP	snRNA (adenine-N6)-methylation	2	1	0.0276708	KIRP
GO:0050884	BP	neuromuscular process controlling posture	18	2	0.0276955	KIRP
GO:0046013	BP	regulation of T cell homeostatic proliferation	3	1	0.0278977	KIRP
GO:0048755	BP	branching morphogenesis of a nerve	11	2	0.0279912	KIRP
GO:0004798	MF	thymidylate kinase activity	2	1	0.0284003	KIRP
GO:0006227	BP	dUDP biosynthetic process	2	1	0.0284003	KIRP
GO:0006233	BP	dTDP biosynthetic process	2	1	0.0284003	KIRP
GO:0009196	BP	pyrimidine deoxyribonucleoside diphosphate metabolic process	2	1	0.0284003	KIRP
GO:0009197	BP	pyrimidine deoxyribonucleoside diphosphate biosynthetic process	2	1	0.0284003	KIRP
GO:0046072	BP	dTDP metabolic process	2	1	0.0284003	KIRP
GO:0046077	BP	dUDP metabolic process	2	1	0.0284003	KIRP
GO:0016165	MF	linoleate 13S-lipoxygenase activity	3	1	0.0284797	KIRP
GO:0050473	MF	arachidonate 15-lipoxygenase activity	3	1	0.0284797	KIRP
GO:2001303	BP	lipoxin A4 biosynthetic process	3	1	0.0284797	KIRP
GO:1990812	CC	growth cone filopodium	3	1	0.0284849	KIRP
GO:0006021	BP	inositol biosynthetic process	3	1	0.0287767	KIRP
GO:0047023	MF	androsterone dehydrogenase activity	8	1	0.0288449	KIRP
GO:0000209	BP	protein polyubiquitination	244	7	0.028888	KIRP
GO:2000349	BP	negative regulation of CD40 signaling pathway	2	1	0.0289161	KIRP
GO:0140096	MF	catalytic activity, acting on a protein	2149	38	0.0292346	KIRP
GO:0050792	BP	regulation of viral process	160	5	0.029521	KIRP
GO:0001734	MF	mRNA (N6-adenosine)-methyltransferase activity	2	1	0.0295777	KIRP
GO:0010428	MF	methyl-CpNpG binding	1	1	0.0296773	KIRP
GO:0034330	BP	cell junction organization	694	19	0.0297651	KIRP
GO:0006955	BP	immune response	1540	25	0.029801	KIRP
GO:0051861	MF	glycolipid binding	28	2	0.0301353	KIRP
GO:0071889	MF	14-3-3 protein binding	31	3	0.0303777	KIRP
GO:1900744	BP	regulation of p38MAPK cascade	44	3	0.0303919	KIRP
GO:0080134	BP	regulation of response to stress	1393	25	0.0304195	KIRP
GO:0031465	CC	Cul4B-RING E3 ubiquitin ligase complex	5	1	0.0304854	KIRP
GO:0009132	BP	nucleoside diphosphate metabolic process	131	5	0.0305471	KIRP
GO:1903412	BP	response to bile acid	6	1	0.0306849	KIRP
GO:0005811	CC	lipid droplet	101	4	0.0308206	KIRP
GO:0070371	BP	ERK1 and ERK2 cascade	328	9	0.0308658	KIRP
GO:0032924	BP	activin receptor signaling pathway	45	3	0.0309516	KIRP
GO:0090291	BP	negative regulation of osteoclast proliferation	2	1	0.0309684	KIRP
GO:1903969	BP	regulation of response to macrophage colony-stimulating factor	6	1	0.0310557	KIRP
GO:1903972	BP	regulation of cellular response to macrophage colony-stimulating factor stimulus	6	1	0.0310557	KIRP
GO:0008545	MF	JUN kinase kinase activity	2	1	0.031087	KIRP
GO:0002086	BP	diaphragm contraction	2	1	0.0311554	KIRP
GO:0016333	BP	morphogenesis of follicular epithelium	1	1	0.0312313	KIRP
GO:0016334	BP	establishment or maintenance of polarity of follicular epithelium	1	1	0.0312313	KIRP
GO:0042247	BP	establishment of planar polarity of follicular epithelium	1	1	0.0312313	KIRP
GO:0005604	CC	basement membrane	99	5	0.031325	KIRP
GO:0070528	BP	protein kinase C signaling	35	3	0.0313652	KIRP
GO:1900108	BP	negative regulation of nodal signaling pathway	4	1	0.0314156	KIRP
GO:1900827	BP	positive regulation of membrane depolarization during cardiac muscle cell action potential	1	1	0.0314192	KIRP
GO:0004623	MF	phospholipase A2 activity	36	2	0.0315444	KIRP
GO:0002230	BP	positive regulation of defense response to virus by host	31	2	0.0317205	KIRP
GO:2000351	BP	regulation of endothelial cell apoptotic process	59	3	0.0317873	KIRP
GO:0070730	BP	cAMP transport	2	1	0.0319247	KIRP
GO:0043322	BP	negative regulation of natural killer cell degranulation	1	1	0.0322172	KIRP
GO:0006691	BP	leukotriene metabolic process	30	2	0.0322726	KIRP
GO:0031173	BP	otolith mineralization completed early in development	1	1	0.0326714	KIRP
GO:0045948	BP	positive regulation of translational initiation	27	2	0.0326963	KIRP
GO:1990147	MF	talin binding	1	1	0.0327244	KIRP
GO:0008988	MF	rRNA (adenine-N6-)-methyltransferase activity	3	1	0.0327435	KIRP
GO:0001777	BP	T cell homeostatic proliferation	4	1	0.0331873	KIRP
GO:0016740	MF	transferase activity	2135	37	0.0331879	KIRP
GO:2001302	BP	lipoxin A4 metabolic process	4	1	0.0332118	KIRP
GO:0051235	BP	maintenance of location	334	9	0.03327	KIRP
GO:0009041	MF	uridylate kinase activity	3	1	0.0334235	KIRP
GO:0002821	BP	positive regulation of adaptive immune response	114	4	0.0335411	KIRP
GO:0045580	BP	regulation of T cell differentiation	177	6	0.0337699	KIRP
GO:0045824	BP	negative regulation of innate immune response	75	3	0.0341015	KIRP
GO:0071222	BP	cellular response to lipopolysaccharide	211	6	0.034409	KIRP
GO:0005773	CC	vacuole	811	16	0.0344333	KIRP
GO:1900271	BP	regulation of long-term synaptic potentiation	46	3	0.0345354	KIRP
GO:0009149	BP	pyrimidine nucleoside triphosphate catabolic process	3	1	0.0345583	KIRP
GO:0061656	MF	SUMO conjugating enzyme activity	1	1	0.0350789	KIRP
GO:1903182	BP	regulation of SUMO transferase activity	1	1	0.0350789	KIRP
GO:1903755	BP	positive regulation of SUMO transferase activity	1	1	0.0350789	KIRP
GO:1990356	CC	sumoylated E2 ligase complex	1	1	0.0350789	KIRP
GO:0019058	BP	viral life cycle	308	8	0.0352873	KIRP
GO:0014003	BP	oligodendrocyte development	43	3	0.0353445	KIRP
GO:0003882	MF	CDP-diacylglycerol-serine O-phosphatidyltransferase activity	1	1	0.0354683	KIRP
GO:0004474	MF	malate synthase activity	1	1	0.035622	KIRP
GO:0047777	MF	(S)-citramalyl-CoA lyase activity	1	1	0.035622	KIRP
GO:0106064	BP	regulation of cobalamin metabolic process	1	1	0.035622	KIRP
GO:0106121	BP	positive regulation of cobalamin metabolic process	1	1	0.035622	KIRP
GO:0010816	BP	calcitonin catabolic process	1	1	0.0356275	KIRP
GO:0034959	BP	endothelin maturation	1	1	0.0356275	KIRP
GO:0035602	BP	fibroblast growth factor receptor signaling pathway involved in negative regulation of apoptotic process in bone marrow cell	1	1	0.0356385	KIRP
GO:0035603	BP	fibroblast growth factor receptor signaling pathway involved in hemopoiesis	1	1	0.0356385	KIRP
GO:0035604	BP	fibroblast growth factor receptor signaling pathway involved in positive regulation of cell proliferation in bone marrow	1	1	0.0356385	KIRP
GO:0035607	BP	fibroblast growth factor receptor signaling pathway involved in orbitofrontal cortex development	1	1	0.0356385	KIRP
GO:0006970	BP	response to osmotic stress	86	4	0.0358357	KIRP
GO:0047044	MF	androstan-3-alpha,17-beta-diol dehydrogenase activity	9	1	0.0359757	KIRP
GO:0051603	BP	proteolysis involved in protein catabolic process	756	15	0.0360423	KIRP
GO:0070425	BP	negative regulation of nucleotide-binding oligomerization domain containing signaling pathway	3	1	0.036423	KIRP
GO:0070433	BP	negative regulation of nucleotide-binding oligomerization domain containing 2 signaling pathway	3	1	0.036423	KIRP
GO:0031093	CC	platelet alpha granule lumen	64	3	0.0364375	KIRP
GO:1905833	BP	negative regulation of microtubule nucleation	1	1	0.0364861	KIRP
GO:0014856	BP	skeletal muscle cell proliferation	20	2	0.0365727	KIRP
GO:0034354	BP	'de novo' NAD biosynthetic process from tryptophan	7	1	0.0366533	KIRP
GO:0007213	BP	G protein-coupled acetylcholine receptor signaling pathway	19	2	0.0367133	KIRP
GO:0019786	MF	Atg8-specific peptidase activity	2	1	0.0367527	KIRP
GO:0032691	BP	negative regulation of interleukin-1 beta production	41	2	0.0367668	KIRP
GO:0071714	MF	icosanoid transmembrane transporter activity	3	1	0.0367704	KIRP
GO:0032057	BP	negative regulation of translational initiation in response to stress	4	1	0.0368507	KIRP
GO:0045887	BP	positive regulation of synaptic assembly at neuromuscular junction	1	1	0.0370629	KIRP
GO:0005985	BP	sucrose metabolic process	3	1	0.0370695	KIRP
GO:0120322	BP	lipid modification by small protein conjugation	1	1	0.0371108	KIRP
GO:0120323	BP	lipid ubiquitination	1	1	0.0371108	KIRP
GO:0097052	BP	L-kynurenine metabolic process	7	1	0.0372649	KIRP
GO:2000316	BP	regulation of T-helper 17 type immune response	30	2	0.0372939	KIRP
GO:1990227	BP	paranodal junction maintenance	2	1	0.0374331	KIRP
GO:0051090	BP	regulation of DNA-binding transcription factor activity	444	11	0.0374728	KIRP
GO:0050145	MF	nucleoside monophosphate kinase activity	19	2	0.0374893	KIRP
GO:0015432	MF	ABC-type bile acid transporter activity	4	1	0.0376295	KIRP
GO:0033283	MF	ATPase-coupled organic acid transmembrane transporter activity	4	1	0.0376295	KIRP
GO:0033284	MF	ATPase-coupled carboxylic acid transmembrane transporter activity	4	1	0.0376295	KIRP
GO:0033285	MF	ATPase-coupled monocarboxylic acid transmembrane transporter activity	4	1	0.0376295	KIRP
GO:0022408	BP	negative regulation of cell-cell adhesion	193	6	0.0377189	KIRP
GO:0000023	BP	maltose metabolic process	3	1	0.0377689	KIRP
GO:0004558	MF	alpha-1,4-glucosidase activity	3	1	0.0377689	KIRP
GO:0032450	MF	maltose alpha-glucosidase activity	3	1	0.0377689	KIRP
GO:0071873	BP	response to norepinephrine	2	1	0.0378914	KIRP
GO:0071874	BP	cellular response to norepinephrine stimulus	2	1	0.0378914	KIRP
GO:0061845	CC	neuron projection branch point	1	1	0.0380549	KIRP
GO:0061846	CC	dendritic spine cytoplasm	1	1	0.0380549	KIRP
GO:0099564	BP	modification of synaptic structure, modulating synaptic transmission	1	1	0.0380549	KIRP
GO:1904636	BP	response to ionomycin	3	1	0.03832	KIRP
GO:1904637	BP	cellular response to ionomycin	3	1	0.03832	KIRP
GO:0070064	MF	proline-rich region binding	17	2	0.0384288	KIRP
GO:0071219	BP	cellular response to molecule of bacterial origin	223	6	0.0384611	KIRP
GO:1990706	CC	MAD1 complex	1	1	0.0384721	KIRP
GO:0102148	MF	N-acetyl-beta-D-galactosaminidase activity	3	1	0.0385402	KIRP
GO:0002252	BP	immune effector process	584	12	0.0387439	KIRP
GO:0043370	BP	regulation of CD4-positive, alpha-beta T cell differentiation	56	3	0.0387789	KIRP
GO:1901740	BP	negative regulation of myoblast fusion	3	1	0.0389682	KIRP
GO:0018904	BP	ether metabolic process	25	2	0.039006	KIRP
GO:0002728	BP	negative regulation of natural killer cell cytokine production	2	1	0.0390491	KIRP
GO:1900073	BP	regulation of neuromuscular synaptic transmission	2	1	0.0392375	KIRP
GO:1900075	BP	positive regulation of neuromuscular synaptic transmission	2	1	0.0392375	KIRP
GO:0051250	BP	negative regulation of lymphocyte activation	159	5	0.0394793	KIRP
GO:0021847	BP	ventricular zone neuroblast division	2	1	0.0394922	KIRP
GO:0043541	CC	UDP-N-acetylglucosamine transferase complex	4	1	0.0395733	KIRP
GO:0072658	BP	maintenance of protein location in membrane	2	1	0.0396341	KIRP
GO:0072660	BP	maintenance of protein location in plasma membrane	2	1	0.0396341	KIRP
GO:2000463	BP	positive regulation of excitatory postsynaptic potential	30	3	0.0396698	KIRP
GO:0019788	MF	NEDD8 transferase activity	6	1	0.0397355	KIRP
GO:1990168	BP	protein K33-linked deubiquitination	4	1	0.039875	KIRP
GO:0045821	BP	positive regulation of glycolytic process	21	2	0.0399991	KIRP
GO:0032058	BP	positive regulation of translational initiation in response to stress	4	1	0.0400779	KIRP
GO:0050777	BP	negative regulation of immune response	182	5	0.0402294	KIRP
GO:0004796	MF	thromboxane-A synthase activity	2	1	0.0402864	KIRP
GO:0072752	BP	cellular response to rapamycin	2	1	0.0403919	KIRP
GO:0098674	CC	extrinsic component of neuronal dense core vesicle membrane	2	1	0.0405084	KIRP
GO:0098922	CC	extrinsic component of dense core granule membrane	2	1	0.0405084	KIRP
GO:0012505	CC	endomembrane system	4526	68	0.0406564	KIRP
GO:0007166	BP	cell surface receptor signaling pathway	2682	48	0.0406615	KIRP
GO:0007178	BP	transmembrane receptor protein serine/threonine kinase signaling pathway	380	11	0.0407658	KIRP
GO:1990425	CC	ryanodine receptor complex	2	1	0.0408187	KIRP
GO:0042611	CC	MHC protein complex	20	2	0.0408826	KIRP
GO:0031664	BP	regulation of lipopolysaccharide-mediated signaling pathway	26	2	0.0409671	KIRP
GO:0006235	BP	dTTP biosynthetic process	4	1	0.0410426	KIRP
GO:0009212	BP	pyrimidine deoxyribonucleoside triphosphate biosynthetic process	4	1	0.0410426	KIRP
GO:0046075	BP	dTTP metabolic process	4	1	0.0410426	KIRP
GO:0045299	BP	otolith mineralization	3	1	0.0414379	KIRP
GO:0031663	BP	lipopolysaccharide-mediated signaling pathway	61	3	0.0414566	KIRP
GO:0050863	BP	regulation of T cell activation	364	9	0.0417474	KIRP
GO:0030183	BP	B cell differentiation	138	5	0.0418044	KIRP
GO:0046134	BP	pyrimidine nucleoside biosynthetic process	4	1	0.0418618	KIRP
GO:0010656	BP	negative regulation of muscle cell apoptotic process	53	3	0.0422151	KIRP
GO:0051151	BP	negative regulation of smooth muscle cell differentiation	22	2	0.042257	KIRP
GO:0042494	BP	detection of bacterial lipoprotein	5	1	0.0423087	KIRP
GO:0043371	BP	negative regulation of CD4-positive, alpha-beta T cell differentiation	22	2	0.0424747	KIRP
GO:0034140	BP	negative regulation of toll-like receptor 3 signaling pathway	3	1	0.0429257	KIRP
GO:0032640	BP	tumor necrosis factor production	178	5	0.043141	KIRP
GO:0032680	BP	regulation of tumor necrosis factor production	178	5	0.043141	KIRP
GO:0034097	BP	response to cytokine	889	16	0.0433122	KIRP
GO:0032552	MF	deoxyribonucleotide binding	5	1	0.0433144	KIRP
GO:0070339	BP	response to bacterial lipopeptide	9	1	0.0433622	KIRP
GO:0071220	BP	cellular response to bacterial lipoprotein	9	1	0.0433622	KIRP
GO:0071221	BP	cellular response to bacterial lipopeptide	9	1	0.0433622	KIRP
GO:2000342	BP	negative regulation of chemokine (C-X-C motif) ligand 2 production	5	1	0.0433964	KIRP
GO:0060595	BP	fibroblast growth factor receptor signaling pathway involved in mammary gland specification	2	1	0.0434512	KIRP
GO:0060615	BP	mammary gland bud formation	2	1	0.0434512	KIRP
GO:0060667	BP	branch elongation involved in salivary gland morphogenesis	2	1	0.0434512	KIRP
GO:0060915	BP	mesenchymal cell differentiation involved in lung development	2	1	0.0434512	KIRP
GO:0021691	BP	cerebellar Purkinje cell layer maturation	2	1	0.0439281	KIRP
GO:0006914	BP	autophagy	545	12	0.0440004	KIRP
GO:0061919	BP	process utilizing autophagic mechanism	545	12	0.0440004	KIRP
GO:0002822	BP	regulation of adaptive immune response based on somatic recombination of immune receptors built from immunoglobulin superfamily domains	174	5	0.0440372	KIRP
GO:0031348	BP	negative regulation of defense response	263	6	0.0440714	KIRP
GO:1904464	BP	regulation of matrix metallopeptidase secretion	10	1	0.0443876	KIRP
GO:1990773	BP	matrix metallopeptidase secretion	10	1	0.0443876	KIRP
GO:0050688	BP	regulation of defense response to virus	74	3	0.044582	KIRP
GO:1990728	CC	mitotic spindle assembly checkpoint MAD1-MAD2 complex	2	1	0.0448076	KIRP
GO:0098635	CC	protein complex involved in cell-cell adhesion	3	1	0.0448175	KIRP
GO:0007176	BP	regulation of epidermal growth factor-activated receptor activity	28	2	0.0448322	KIRP
GO:0002366	BP	leukocyte activation involved in immune response	274	7	0.0449082	KIRP
GO:0061042	BP	vascular wound healing	21	2	0.0450096	KIRP
GO:0050870	BP	positive regulation of T cell activation	243	7	0.0452706	KIRP
GO:0030050	BP	vesicle transport along actin filament	19	2	0.045274	KIRP
GO:0071947	BP	protein deubiquitination involved in ubiquitin-dependent protein catabolic process	5	1	0.0452969	KIRP
GO:0051222	BP	positive regulation of protein transport	290	8	0.0452983	KIRP
GO:0051249	BP	regulation of lymphocyte activation	483	11	0.0453377	KIRP
GO:0005369	MF	taurine:sodium symporter activity	3	1	0.0454476	KIRP
GO:0005783	CC	endoplasmic reticulum	1936	32	0.0454492	KIRP
GO:0034146	BP	toll-like receptor 5 signaling pathway	2	1	0.045531	KIRP
GO:0036134	MF	12-hydroxyheptadecatrienoic acid synthase activity	3	1	0.0455583	KIRP
GO:0032692	BP	negative regulation of interleukin-1 production	48	2	0.0457766	KIRP
GO:0043274	MF	phospholipase binding	22	2	0.0457857	KIRP
GO:0042998	BP	positive regulation of Golgi to plasma membrane protein transport	5	1	0.0459508	KIRP
GO:0042631	BP	cellular response to water deprivation	3	1	0.0459737	KIRP
GO:0072577	BP	endothelial cell apoptotic process	65	3	0.0461173	KIRP
GO:1903296	BP	positive regulation of glutamate secretion, neurotransmission	4	1	0.0462654	KIRP
GO:0060529	BP	squamous basal epithelial stem cell differentiation involved in prostate gland acinus development	2	1	0.0464052	KIRP
GO:0036342	BP	post-anal tail morphogenesis	17	2	0.0464099	KIRP
GO:0002705	BP	positive regulation of leukocyte mediated immunity	131	4	0.0464468	KIRP
GO:0016321	BP	female meiosis chromosome segregation	5	1	0.0464796	KIRP
GO:0002587	BP	negative regulation of antigen processing and presentation of peptide antigen via MHC class II	2	1	0.0465218	KIRP
GO:0072574	BP	hepatocyte proliferation	22	2	0.0466292	KIRP
GO:0072575	BP	epithelial cell proliferation involved in liver morphogenesis	22	2	0.0466292	KIRP
GO:0000294	BP	nuclear-transcribed mRNA catabolic process, endonucleolytic cleavage-dependent decay	2	1	0.0466876	KIRP
GO:1902499	BP	positive regulation of protein autoubiquitination	3	1	0.0467538	KIRP
GO:0006692	BP	prostanoid metabolic process	48	2	0.0468399	KIRP
GO:0006693	BP	prostaglandin metabolic process	48	2	0.0468399	KIRP
GO:0030155	BP	regulation of cell adhesion	783	18	0.046869	KIRP
GO:1904398	BP	positive regulation of neuromuscular junction development	2	1	0.0470408	KIRP
GO:1901626	BP	regulation of postsynaptic membrane organization	3	1	0.0471556	KIRP
GO:0071706	BP	tumor necrosis factor superfamily cytokine production	183	5	0.0472779	KIRP
GO:1903555	BP	regulation of tumor necrosis factor superfamily cytokine production	183	5	0.0472779	KIRP
GO:0001919	BP	regulation of receptor recycling	22	2	0.0475027	KIRP
GO:0070555	BP	response to interleukin-1	134	4	0.0478588	KIRP
GO:0009139	BP	pyrimidine nucleoside diphosphate biosynthetic process	6	1	0.0478994	KIRP
GO:0072539	BP	T-helper 17 cell differentiation	30	2	0.0481338	KIRP
GO:0002677	BP	negative regulation of chronic inflammatory response	5	1	0.0481464	KIRP
GO:0060648	BP	mammary gland bud morphogenesis	3	1	0.0485631	KIRP
GO:0042326	BP	negative regulation of phosphorylation	371	10	0.0486639	KIRP
GO:0035582	BP	sequestering of BMP in extracellular matrix	4	1	0.0490568	KIRP
GO:0072576	BP	liver morphogenesis	23	2	0.0491036	KIRP
GO:0031467	CC	Cul7-RING ubiquitin ligase complex	4	1	0.0491281	KIRP
GO:0070372	BP	regulation of ERK1 and ERK2 cascade	305	8	0.0491438	KIRP
GO:1903829	BP	positive regulation of protein localization	446	11	0.0492951	KIRP
GO:0018108	BP	peptidyl-tyrosine phosphorylation	366	10	0.049415	KIRP
GO:0010032	BP	meiotic chromosome condensation	6	1	0.0494945	KIRP
GO:0106310	MF	protein serine kinase activity	355	10	0.0494973	KIRP
GO:0002702	BP	positive regulation of production of molecular mediator of immune response	129	4	0.0496517	KIRP
GO:0010884	BP	positive regulation of lipid storage	27	2	0.0497034	KIRP

## Sheet: THCA
ID	ONTOLOGY	TERM	N	DE	P.DE	Cancer
GO:0030218	BP	erythrocyte differentiation	128	3	7.9882e-05	THCA
GO:0034101	BP	erythrocyte homeostasis	136	3	9.22375e-05	THCA
GO:1903587	BP	regulation of blood vessel endothelial cell proliferation involved in sprouting angiogenesis	42	2	0.000130105	THCA
GO:0045943	BP	positive regulation of transcription by RNA polymerase I	31	2	0.000161397	THCA
GO:0002262	BP	myeloid cell homeostasis	168	3	0.000166079	THCA
GO:0001968	MF	fibronectin binding	31	2	0.000177901	THCA
GO:0016570	BP	histone modification	466	4	0.000178571	THCA
GO:0051894	BP	positive regulation of focal adhesion assembly	26	2	0.000188596	THCA
GO:0022408	BP	negative regulation of cell-cell adhesion	193	3	0.00019371	THCA
GO:1900745	BP	positive regulation of p38MAPK cascade	30	2	0.000212755	THCA
GO:0045648	BP	positive regulation of erythrocyte differentiation	34	2	0.000239795	THCA
GO:0002043	BP	blood vessel endothelial cell proliferation involved in sprouting angiogenesis	49	2	0.000243309	THCA
GO:0150117	BP	positive regulation of cell-substrate junction organization	31	2	0.000277322	THCA
GO:0006356	BP	regulation of transcription by RNA polymerase I	41	2	0.000288447	THCA
GO:1900744	BP	regulation of p38MAPK cascade	44	2	0.000454541	THCA
GO:0006360	BP	transcription by RNA polymerase I	59	2	0.000524247	THCA
GO:0045646	BP	regulation of erythrocyte differentiation	47	2	0.000547481	THCA
GO:1905046	BP	positive regulation of Schwann cell proliferation involved in axon regeneration	2	1	0.000562843	THCA
GO:0048738	BP	cardiac muscle tissue development	239	3	0.000670667	THCA
GO:0002682	BP	regulation of immune system process	1386	5	0.000695727	THCA
GO:0048872	BP	homeostasis of number of cells	291	3	0.000704659	THCA
GO:0038066	BP	p38MAPK cascade	56	2	0.000747308	THCA
GO:0010557	BP	positive regulation of macromolecule biosynthetic process	1870	6	0.000788067	THCA
GO:0001954	BP	positive regulation of cell-matrix adhesion	56	2	0.000796922	THCA
GO:0014706	BP	striated muscle tissue development	255	3	0.000812165	THCA
GO:1903570	BP	regulation of protein kinase D signaling	1	1	0.000875297	THCA
GO:1903572	BP	positive regulation of protein kinase D signaling	1	1	0.000875297	THCA
GO:0140801	MF	histone kinase activity (H2A-Y142 specific)	1	1	0.000882741	THCA
GO:0080135	BP	regulation of cellular response to stress	718	4	0.000886306	THCA
GO:0007162	BP	negative regulation of cell adhesion	299	3	0.000909441	THCA
GO:0031328	BP	positive regulation of cellular biosynthetic process	1980	6	0.00102342	THCA
GO:1901551	BP	negative regulation of endothelial cell development	2	1	0.00112717	THCA
GO:1903141	BP	negative regulation of establishment of endothelial barrier	2	1	0.00112717	THCA
GO:0009891	BP	positive regulation of biosynthetic process	2022	6	0.00112911	THCA
GO:1902034	BP	negative regulation of hematopoietic stem cell proliferation	4	1	0.00121432	THCA
GO:0001165	MF	RNA polymerase I cis-regulatory region sequence-specific DNA binding	1	1	0.00122847	THCA
GO:0032705	BP	negative regulation of interleukin-21 production	5	1	0.00123263	THCA
GO:0043183	MF	vascular endothelial growth factor receptor 1 binding	3	1	0.00125973	THCA
GO:0031325	BP	positive regulation of cellular metabolic process	3031	7	0.00133268	THCA
GO:0097532	BP	stress response to acid chemical	3	1	0.00135543	THCA
GO:0097533	BP	cellular stress response to acid chemical	3	1	0.00135543	THCA
GO:0035400	MF	histone tyrosine kinase activity	2	1	0.00136609	THCA
GO:0051893	BP	regulation of focal adhesion assembly	64	2	0.00137433	THCA
GO:0090109	BP	regulation of cell-substrate junction assembly	64	2	0.00137433	THCA
GO:0051173	BP	positive regulation of nitrogen compound metabolic process	3069	7	0.00137518	THCA
GO:1903122	BP	negative regulation of TRAIL-activated apoptotic signaling pathway	3	1	0.00141365	THCA
GO:0014011	BP	Schwann cell proliferation involved in axon regeneration	3	1	0.00141777	THCA
GO:1905044	BP	regulation of Schwann cell proliferation involved in axon regeneration	3	1	0.00141777	THCA
GO:0010625	BP	positive regulation of Schwann cell proliferation	3	1	0.00142417	THCA
GO:1900149	BP	positive regulation of Schwann cell migration	3	1	0.00146777	THCA
GO:0150116	BP	regulation of cell-substrate junction organization	69	2	0.00158771	THCA
GO:1903706	BP	regulation of hemopoiesis	405	3	0.00179537	THCA
GO:0045639	BP	positive regulation of myeloid cell differentiation	102	2	0.00189548	THCA
GO:0090535	CC	WICH complex	2	1	0.00190418	THCA
GO:1903379	BP	regulation of mitotic chromosome condensation	2	1	0.00190418	THCA
GO:1905213	BP	negative regulation of mitotic chromosome condensation	2	1	0.00190418	THCA
GO:0030097	BP	hemopoiesis	898	4	0.00194675	THCA
GO:0031058	BP	positive regulation of histone modification	102	2	0.00196369	THCA
GO:0003169	BP	coronary vein morphogenesis	2	1	0.00202921	THCA
GO:0030099	BP	myeloid cell differentiation	402	3	0.00206704	THCA
GO:0038190	BP	VEGF-activated neuropilin signaling pathway	2	1	0.00213341	THCA
GO:1905604	BP	negative regulation of blood-brain barrier permeability	3	1	0.002161	THCA
GO:1900086	BP	positive regulation of peptidyl-tyrosine autophosphorylation	3	1	0.00223586	THCA
GO:1903038	BP	negative regulation of leukocyte cell-cell adhesion	139	2	0.00224518	THCA
GO:0044020	MF	histone methyltransferase activity (H4-R3 specific)	4	1	0.00228209	THCA
GO:1902336	BP	positive regulation of retinal ganglion cell axon guidance	3	1	0.00238737	THCA
GO:0048534	BP	hematopoietic or lymphoid organ development	940	4	0.00243423	THCA
GO:0048041	BP	focal adhesion assembly	85	2	0.00244716	THCA
GO:0010604	BP	positive regulation of macromolecule metabolic process	3442	7	0.00250078	THCA
GO:0032625	BP	interleukin-21 production	7	1	0.00256104	THCA
GO:0032665	BP	regulation of interleukin-21 production	7	1	0.00256104	THCA
GO:0016043	BP	cellular component organization	6085	9	0.00256875	THCA
GO:0001181	MF	RNA polymerase I general transcription initiation factor activity	5	1	0.00260939	THCA
GO:0043985	BP	histone H4-R3 methylation	6	1	0.00263307	THCA
GO:0070053	MF	thrombospondin receptor activity	4	1	0.00263453	THCA
GO:1902669	BP	positive regulation of axon guidance	4	1	0.00281359	THCA
GO:1903553	BP	positive regulation of extracellular exosome assembly	4	1	0.00290342	THCA
GO:1903392	BP	negative regulation of adherens junction organization	3	1	0.00292379	THCA
GO:0038086	BP	VEGF-activated platelet-derived growth factor receptor signaling pathway	3	1	0.00292693	THCA
GO:0038091	BP	positive regulation of cell proliferation by VEGF-activated platelet derived growth factor receptor signaling pathway	3	1	0.00292693	THCA
GO:0060754	BP	positive regulation of mast cell chemotaxis	6	1	0.00295692	THCA
GO:1902340	BP	negative regulation of chromosome condensation	4	1	0.0029642	THCA
GO:0002520	BP	immune system development	997	4	0.00296849	THCA
GO:0060948	BP	cardiac vascular smooth muscle cell development	3	1	0.0030062	THCA
GO:0048523	BP	negative regulation of cellular process	4746	8	0.00305289	THCA
GO:0071840	BP	cellular component organization or biogenesis	6287	9	0.00307805	THCA
GO:0007044	BP	cell-substrate junction assembly	95	2	0.00307902	THCA
GO:0042127	BP	regulation of cell population proliferation	1709	5	0.0030815	THCA
GO:1901890	BP	positive regulation of cell junction assembly	105	2	0.0030867	THCA
GO:0022407	BP	regulation of cell-cell adhesion	474	3	0.00316819	THCA
GO:0089700	BP	protein kinase D signaling	4	1	0.00331014	THCA
GO:0001657	BP	ureteric bud development	97	2	0.00335125	THCA
GO:0072163	BP	mesonephric epithelium development	98	2	0.00340527	THCA
GO:0072164	BP	mesonephric tubule development	98	2	0.00340527	THCA
GO:0060537	BP	muscle tissue development	418	3	0.0034187	THCA
GO:0150115	BP	cell-substrate junction organization	101	2	0.00342268	THCA
GO:1900084	BP	regulation of peptidyl-tyrosine autophosphorylation	4	1	0.00346725	THCA
GO:0060319	BP	primitive erythrocyte differentiation	5	1	0.00354665	THCA
GO:0001823	BP	mesonephros development	102	2	0.00364858	THCA
GO:0010811	BP	positive regulation of cell-substrate adhesion	125	2	0.00374395	THCA
GO:0055007	BP	cardiac muscle cell differentiation	124	2	0.00378271	THCA
GO:0045893	BP	positive regulation of DNA-templated transcription	1653	5	0.00379573	THCA
GO:1903508	BP	positive regulation of nucleic acid-templated transcription	1653	5	0.00379573	THCA
GO:1902680	BP	positive regulation of RNA biosynthetic process	1659	5	0.00383673	THCA
GO:0043410	BP	positive regulation of MAPK cascade	484	3	0.00383924	THCA
GO:0032874	BP	positive regulation of stress-activated MAPK cascade	129	2	0.0038398	THCA
GO:1904995	BP	negative regulation of leukocyte adhesion to vascular endothelial cell	11	1	0.00387589	THCA
GO:0036135	BP	Schwann cell migration	6	1	0.00389202	THCA
GO:1900147	BP	regulation of Schwann cell migration	6	1	0.00389202	THCA
GO:0010556	BP	regulation of macromolecule biosynthetic process	3800	7	0.003902	THCA
GO:0034329	BP	cell junction assembly	423	3	0.00392072	THCA
GO:0001667	BP	ameboidal-type cell migration	482	3	0.00396296	THCA
GO:0070304	BP	positive regulation of stress-activated protein kinase signaling cascade	131	2	0.00399786	THCA
GO:1901165	BP	positive regulation of trophoblast cell migration	6	1	0.0040282	THCA
GO:0038189	BP	neuropilin signaling pathway	4	1	0.00405707	THCA
GO:1903551	BP	regulation of extracellular exosome assembly	6	1	0.0040821	THCA
GO:1903121	BP	regulation of TRAIL-activated apoptotic signaling pathway	6	1	0.00414775	THCA
GO:0001952	BP	regulation of cell-matrix adhesion	125	2	0.0042201	THCA
GO:0009893	BP	positive regulation of metabolic process	3761	7	0.00422555	THCA
GO:0036324	BP	vascular endothelial growth factor receptor-2 signaling pathway	5	1	0.00423274	THCA
GO:0001163	MF	RNA polymerase I transcription regulatory region sequence-specific DNA binding	7	1	0.00428197	THCA
GO:0001164	MF	RNA polymerase I core promoter sequence-specific DNA binding	7	1	0.00428197	THCA
GO:0060753	BP	regulation of mast cell chemotaxis	8	1	0.00432896	THCA
GO:0065004	BP	protein-DNA complex assembly	204	2	0.00434255	THCA
GO:0003158	BP	endothelium development	138	2	0.0043569	THCA
GO:0001936	BP	regulation of endothelial cell proliferation	177	2	0.00438775	THCA
GO:0001188	BP	RNA polymerase I preinitiation complex assembly	8	1	0.00442883	THCA
GO:0031077	BP	post-embryonic camera-type eye development	8	1	0.00452285	THCA
GO:1901727	BP	positive regulation of histone deacetylase activity	6	1	0.00452579	THCA
GO:0022607	BP	cellular component assembly	2868	6	0.00452682	THCA
GO:0038033	BP	positive regulation of endothelial cell chemotaxis by VEGF-activated vascular endothelial growth factor receptor signaling pathway	5	1	0.00459207	THCA
GO:0002040	BP	sprouting angiogenesis	177	2	0.00461071	THCA
GO:0035241	MF	protein-arginine omega-N monomethyltransferase activity	6	1	0.00469781	THCA
GO:0090045	BP	positive regulation of deacetylase activity	8	1	0.0048234	THCA
GO:0034709	CC	methylosome	12	1	0.00484074	THCA
GO:0031326	BP	regulation of cellular biosynthetic process	3965	7	0.00488622	THCA
GO:0061419	BP	positive regulation of transcription from RNA polymerase II promoter in response to hypoxia	5	1	0.00491775	THCA
GO:0071971	BP	extracellular exosome assembly	7	1	0.00493714	THCA
GO:0110016	CC	B-WICH complex	7	1	0.00494721	THCA
GO:0060215	BP	primitive hemopoiesis	8	1	0.00496379	THCA
GO:0046985	BP	positive regulation of hemoglobin biosynthetic process	6	1	0.004996	THCA
GO:0045653	BP	negative regulation of megakaryocyte differentiation	17	1	0.00499676	THCA
GO:0090259	BP	regulation of retinal ganglion cell axon guidance	6	1	0.00505671	THCA
GO:0044828	BP	negative regulation by host of viral genome replication	8	1	0.00507108	THCA
GO:1903977	BP	positive regulation of glial cell migration	11	1	0.00515405	THCA
GO:0048273	MF	mitogen-activated protein kinase p38 binding	6	1	0.00527779	THCA
GO:0051254	BP	positive regulation of RNA metabolic process	1802	5	0.00528412	THCA
GO:1903391	BP	regulation of adherens junction organization	5	1	0.005286	THCA
GO:0106106	BP	cold-induced thermogenesis	147	2	0.00528926	THCA
GO:0120161	BP	regulation of cold-induced thermogenesis	147	2	0.00528926	THCA
GO:0031974	CC	membrane-enclosed lumen	5797	8	0.0053217	THCA
GO:0043233	CC	organelle lumen	5797	8	0.0053217	THCA
GO:0070013	CC	intracellular organelle lumen	5797	8	0.0053217	THCA
GO:0009889	BP	regulation of biosynthetic process	4029	7	0.00539965	THCA
GO:0001935	BP	endothelial cell proliferation	193	2	0.00546166	THCA
GO:0031175	BP	neuron projection development	953	4	0.00553755	THCA
GO:0043184	MF	vascular endothelial growth factor receptor 2 binding	9	1	0.00554168	THCA
GO:0035242	MF	protein-arginine omega-N asymmetric methyltransferase activity	7	1	0.00561786	THCA
GO:0008469	MF	histone-arginine N-methyltransferase activity	8	1	0.00561983	THCA
GO:0016573	BP	histone acetylation	176	2	0.00584644	THCA
GO:0046984	BP	regulation of hemoglobin biosynthetic process	7	1	0.0058801	THCA
GO:0014012	BP	peripheral nervous system axon regeneration	10	1	0.00596329	THCA
GO:0008283	BP	cell population proliferation	1987	5	0.00596448	THCA
GO:0006361	BP	transcription initiation at RNA polymerase I promoter	12	1	0.00601798	THCA
GO:0031056	BP	regulation of histone modification	175	2	0.00602816	THCA
GO:1990845	BP	adaptive thermogenesis	160	2	0.00614425	THCA
GO:0010634	BP	positive regulation of epithelial cell migration	172	2	0.00615328	THCA
GO:0071824	BP	protein-DNA complex subunit organization	239	2	0.00616252	THCA
GO:0031010	CC	ISWI-type complex	13	1	0.00624166	THCA
GO:0060354	BP	negative regulation of cell adhesion molecule production	13	1	0.00624213	THCA
GO:0018393	BP	internal peptidyl-lysine acetylation	181	2	0.00624591	THCA
GO:0009611	BP	response to wounding	566	3	0.00630266	THCA
GO:0060623	BP	regulation of chromosome condensation	11	1	0.00632269	THCA
GO:0044085	BP	cellular component biogenesis	3126	6	0.00634079	THCA
GO:2000726	BP	negative regulation of cardiac muscle cell differentiation	10	1	0.00636651	THCA
GO:0010976	BP	positive regulation of neuron projection development	155	2	0.00637197	THCA
GO:0006475	BP	internal protein amino acid acetylation	183	2	0.00638198	THCA
GO:1905603	BP	regulation of blood-brain barrier permeability	8	1	0.00642944	THCA
GO:0002551	BP	mast cell chemotaxis	12	1	0.00646908	THCA
GO:0035051	BP	cardiocyte differentiation	158	2	0.00646969	THCA
GO:0051171	BP	regulation of nitrogen compound metabolic process	5509	8	0.00652652	THCA
GO:0031323	BP	regulation of cellular metabolic process	5461	8	0.00656067	THCA
GO:0035148	BP	tube formation	155	2	0.00664658	THCA
GO:0048519	BP	negative regulation of biological process	5593	8	0.00684562	THCA
GO:1901725	BP	regulation of histone deacetylase activity	10	1	0.00688439	THCA
GO:0044793	BP	negative regulation by host of viral process	13	1	0.00692094	THCA
GO:0034969	BP	histone arginine methylation	13	1	0.00692409	THCA
GO:0018394	BP	peptidyl-lysine acetylation	192	2	0.00697457	THCA
GO:0072073	BP	kidney epithelium development	145	2	0.00699663	THCA
GO:0018193	BP	peptidyl-amino acid modification	1233	4	0.0070074	THCA
GO:0150065	BP	regulation of deacetylase activity	12	1	0.00718136	THCA
GO:0048639	BP	positive regulation of developmental growth	164	2	0.00749704	THCA
GO:0048842	BP	positive regulation of axon extension involved in axon guidance	7	1	0.00749756	THCA
GO:0080134	BP	regulation of response to stress	1394	4	0.00753607	THCA
GO:0072359	BP	circulatory system development	1187	4	0.00761011	THCA
GO:0005172	MF	vascular endothelial growth factor receptor binding	14	1	0.00761937	THCA
GO:0070776	CC	MOZ/MORF histone acetyltransferase complex	9	1	0.00766214	THCA
GO:0060982	BP	coronary artery morphogenesis	9	1	0.00766577	THCA
GO:0045602	BP	negative regulation of endothelial cell differentiation	12	1	0.00771797	THCA
GO:0045935	BP	positive regulation of nucleobase-containing compound metabolic process	2004	5	0.00778728	THCA
GO:0001659	BP	temperature homeostasis	178	2	0.00781174	THCA
GO:0045637	BP	regulation of myeloid cell differentiation	209	2	0.00784889	THCA
GO:0060947	BP	cardiac vascular smooth muscle cell differentiation	10	1	0.00785383	THCA
GO:0009888	BP	tissue development	1950	5	0.00787186	THCA
GO:0032872	BP	regulation of stress-activated MAPK cascade	192	2	0.00787575	THCA
GO:0080090	BP	regulation of primary metabolic process	5667	8	0.00789227	THCA
GO:1903589	BP	positive regulation of blood vessel endothelial cell proliferation involved in sprouting angiogenesis	20	1	0.00796431	THCA
GO:0010624	BP	regulation of Schwann cell proliferation	11	1	0.00803404	THCA
GO:0014010	BP	Schwann cell proliferation	11	1	0.00803404	THCA
GO:0038089	BP	positive regulation of cell migration by vascular endothelial growth factor signaling pathway	8	1	0.00808367	THCA
GO:0070775	CC	H3 histone acetyltransferase complex	10	1	0.00811922	THCA
GO:2000048	BP	negative regulation of cell-cell adhesion mediated by cadherin	9	1	0.00812607	THCA
GO:0042541	BP	hemoglobin biosynthetic process	13	1	0.00813393	THCA
GO:0070302	BP	regulation of stress-activated protein kinase signaling cascade	195	2	0.00819285	THCA
GO:0016273	MF	arginine N-methyltransferase activity	12	1	0.0082307	THCA
GO:0016274	MF	protein-arginine N-methyltransferase activity	12	1	0.0082307	THCA
GO:0097531	BP	mast cell migration	15	1	0.00837259	THCA
GO:0048522	BP	positive regulation of cellular process	5476	8	0.00846157	THCA
GO:1903588	BP	negative regulation of blood vessel endothelial cell proliferation involved in sprouting angiogenesis	22	1	0.00847742	THCA
GO:0050930	BP	induction of positive chemotaxis	14	1	0.00851478	THCA
GO:0060353	BP	regulation of cell adhesion molecule production	19	1	0.00858561	THCA
GO:0048666	BP	neuron development	1098	4	0.00860544	THCA
GO:0048845	BP	venous blood vessel morphogenesis	9	1	0.00872913	THCA
GO:0006473	BP	protein acetylation	222	2	0.00888075	THCA
GO:0043129	BP	surfactant homeostasis	15	1	0.00894159	THCA
GO:1901163	BP	regulation of trophoblast cell migration	15	1	0.00901218	THCA
GO:0061418	BP	regulation of transcription from RNA polymerase II promoter in response to hypoxia	11	1	0.0090241	THCA
GO:0036462	BP	TRAIL-activated apoptotic signaling pathway	13	1	0.00925136	THCA
GO:0002376	BP	immune system process	2453	5	0.00933195	THCA
GO:0043408	BP	regulation of MAPK cascade	677	3	0.00940207	THCA
GO:0020027	BP	hemoglobin metabolic process	17	1	0.00943761	THCA
GO:0090037	BP	positive regulation of protein kinase C signaling	10	1	0.0095679	THCA
GO:0007507	BP	heart development	598	3	0.00965064	THCA
GO:0048680	BP	positive regulation of axon regeneration	13	1	0.00975949	THCA
GO:0060352	BP	cell adhesion molecule production	22	1	0.00984344	THCA
GO:0045216	BP	cell-cell junction organization	203	2	0.00986919	THCA
GO:0070572	BP	positive regulation of neuron projection regeneration	14	1	0.00989761	THCA
GO:0097084	BP	vascular associated smooth muscle cell development	12	1	0.0099005	THCA
GO:0042393	MF	histone binding	246	2	0.00992859	THCA
GO:1902033	BP	regulation of hematopoietic stem cell proliferation	16	1	0.00994261	THCA
GO:0009059	BP	macromolecule biosynthetic process	4570	7	0.0100911	THCA
GO:0071679	BP	commissural neuron axon guidance	11	1	0.0101121	THCA
GO:0061450	BP	trophoblast cell migration	16	1	0.0101895	THCA
GO:0010749	BP	regulation of nitric oxide mediated signal transduction	11	1	0.0103914	THCA
GO:0044827	BP	modulation by host of viral genome replication	22	1	0.0104506	THCA
GO:1902667	BP	regulation of axon guidance	12	1	0.0104757	THCA
GO:0048875	BP	chemical homeostasis within a tissue	17	1	0.010627	THCA
GO:0065003	BP	protein-containing complex assembly	1540	4	0.0106355	THCA
GO:1905208	BP	negative regulation of cardiocyte differentiation	14	1	0.0109015	THCA
GO:1904047	MF	S-adenosyl-L-methionine binding	17	1	0.0109338	THCA
GO:0018216	BP	peptidyl-arginine methylation	18	1	0.0110827	THCA
GO:1903975	BP	regulation of glial cell migration	19	1	0.0111774	THCA
GO:1901550	BP	regulation of endothelial cell development	17	1	0.0112552	THCA
GO:1903140	BP	regulation of establishment of endothelial barrier	17	1	0.0112552	THCA
GO:0051247	BP	positive regulation of protein metabolic process	1455	4	0.0114133	THCA
GO:1903543	BP	positive regulation of exosomal secretion	15	1	0.0114245	THCA
GO:1901888	BP	regulation of cell junction assembly	203	2	0.0114998	THCA
GO:0005243	MF	gap junction channel activity	20	1	0.0115007	THCA
GO:0005922	CC	connexin complex	20	1	0.0115007	THCA
GO:0051403	BP	stress-activated MAPK cascade	236	2	0.0116645	THCA
GO:0043543	BP	protein acylation	263	2	0.0116885	THCA
GO:0043009	BP	chordate embryonic development	649	3	0.0116923	THCA
GO:0097475	BP	motor neuron migration	13	1	0.0119027	THCA
GO:0010810	BP	regulation of cell-substrate adhesion	220	2	0.0119841	THCA
GO:0008285	BP	negative regulation of cell population proliferation	769	3	0.0120234	THCA
GO:0005161	MF	platelet-derived growth factor receptor binding	14	1	0.0121443	THCA
GO:0045596	BP	negative regulation of cell differentiation	689	3	0.0122029	THCA
GO:0031098	BP	stress-activated protein kinase signaling cascade	243	2	0.0123211	THCA
GO:0060255	BP	regulation of macromolecule metabolic process	6325	8	0.0124838	THCA
GO:0009792	BP	embryo development ending in birth or egg hatching	671	3	0.0126539	THCA
GO:1901681	MF	sulfur compound binding	262	2	0.0127218	THCA
GO:1903541	BP	regulation of exosomal secretion	17	1	0.0130983	THCA
GO:0007076	BP	mitotic chromosome condensation	19	1	0.0132181	THCA
GO:0035173	MF	histone kinase activity	20	1	0.0133106	THCA
GO:2001028	BP	positive regulation of endothelial cell chemotaxis	15	1	0.0133126	THCA
GO:0006950	BP	response to stress	3790	6	0.0134368	THCA
GO:0048569	BP	post-embryonic animal organ development	18	1	0.0134619	THCA
GO:0000165	BP	MAPK cascade	772	3	0.0135092	THCA
GO:2000026	BP	regulation of multicellular organismal development	1440	4	0.0138962	THCA
GO:0048731	BP	system development	4345	7	0.0139031	THCA
GO:0036003	BP	positive regulation of transcription from RNA polymerase II promoter in response to stress	19	1	0.0139217	THCA
GO:0007160	BP	cell-matrix adhesion	236	2	0.0139615	THCA
GO:0043034	CC	costamere	16	1	0.0140847	THCA
GO:0018195	BP	peptidyl-arginine modification	25	1	0.0141661	THCA
GO:0001568	BP	blood vessel development	768	3	0.0142995	THCA
GO:0060252	BP	positive regulation of glial cell proliferation	21	1	0.0143993	THCA
GO:1901522	BP	positive regulation of transcription from RNA polymerase II promoter involved in cellular response to chemical stimulus	21	1	0.01445	THCA
GO:0010632	BP	regulation of epithelial cell migration	284	2	0.0145842	THCA
GO:0043116	BP	negative regulation of vascular permeability	18	1	0.0145867	THCA
GO:0051246	BP	regulation of protein metabolic process	2571	5	0.0147205	THCA
GO:0060841	BP	venous blood vessel development	16	1	0.014748	THCA
GO:0042056	MF	chemoattractant activity	27	1	0.0147582	THCA
GO:0045927	BP	positive regulation of growth	251	2	0.0147731	THCA
GO:0045945	BP	positive regulation of transcription by RNA polymerase III	18	1	0.0148186	THCA
GO:0043117	BP	positive regulation of vascular permeability	18	1	0.0149292	THCA
GO:0009967	BP	positive regulation of signal transduction	1525	4	0.0150383	THCA
GO:0034330	BP	cell junction organization	694	3	0.0151209	THCA
GO:1990182	BP	exosomal secretion	20	1	0.0152319	THCA
GO:0030155	BP	regulation of cell adhesion	784	3	0.0153706	THCA
GO:0050769	BP	positive regulation of neurogenesis	228	2	0.0153747	THCA
GO:2000725	BP	regulation of cardiac muscle cell differentiation	21	1	0.0153994	THCA
GO:1900016	BP	negative regulation of cytokine production involved in inflammatory response	37	1	0.0156929	THCA
GO:0001944	BP	vasculature development	802	3	0.0158407	THCA
GO:0048518	BP	positive regulation of biological process	6110	8	0.0158761	THCA
GO:0090190	BP	positive regulation of branching involved in ureteric bud morphogenesis	18	1	0.0159703	THCA
GO:0061042	BP	vascular wound healing	21	1	0.016028	THCA
GO:0010558	BP	negative regulation of macromolecule biosynthetic process	1530	4	0.0160345	THCA
GO:0043933	BP	protein-containing complex organization	1731	4	0.0160458	THCA
GO:0097734	BP	extracellular exosome biogenesis	21	1	0.0160782	THCA
GO:0032793	BP	positive regulation of CREB transcription factor activity	19	1	0.0162351	THCA
GO:1903672	BP	positive regulation of sprouting angiogenesis	27	1	0.01661	THCA
GO:0060749	BP	mammary gland alveolus development	19	1	0.0167708	THCA
GO:0061377	BP	mammary gland lobule development	19	1	0.0167708	THCA
GO:0090050	BP	positive regulation of cell migration involved in sprouting angiogenesis	32	1	0.0167856	THCA
GO:0060977	BP	coronary vasculature morphogenesis	19	1	0.0168586	THCA
GO:0006338	BP	chromatin remodeling	346	2	0.0169704	THCA
GO:0004402	MF	histone acetyltransferase activity	31	1	0.0170468	THCA
GO:0035162	BP	embryonic hemopoiesis	24	1	0.0170659	THCA
GO:0140112	BP	extracellular vesicle biogenesis	23	1	0.0171521	THCA
GO:0005721	CC	pericentric heterochromatin	28	1	0.0172752	THCA
GO:0005921	CC	gap junction	31	1	0.0176304	THCA
GO:0022829	MF	wide pore channel activity	30	1	0.0177006	THCA
GO:0008327	MF	methyl-CpG binding	25	1	0.0177266	THCA
GO:1904994	BP	regulation of leukocyte adhesion to vascular endothelial cell	38	1	0.017888	THCA
GO:2001026	BP	regulation of endothelial cell chemotaxis	23	1	0.0179357	THCA
GO:0050927	BP	positive regulation of positive chemotaxis	25	1	0.0181078	THCA
GO:0045765	BP	regulation of angiogenesis	340	2	0.0181111	THCA
GO:0031327	BP	negative regulation of cellular biosynthetic process	1596	4	0.0182107	THCA
GO:0016050	BP	vesicle organization	345	2	0.0182349	THCA
GO:0042592	BP	homeostatic process	1668	4	0.0182615	THCA
GO:0030182	BP	neuron differentiation	1364	4	0.0182714	THCA
GO:0031065	BP	positive regulation of histone deacetylation	23	1	0.0182869	THCA
GO:2000047	BP	regulation of cell-cell adhesion mediated by cadherin	20	1	0.0183425	THCA
GO:0090036	BP	regulation of protein kinase C signaling	19	1	0.0183438	THCA
GO:0050926	BP	regulation of positive chemotaxis	26	1	0.0184662	THCA
GO:0045652	BP	regulation of megakaryocyte differentiation	34	1	0.0185614	THCA
GO:1901342	BP	regulation of vasculature development	346	2	0.0186102	THCA
GO:1903037	BP	regulation of leukocyte cell-cell adhesion	363	2	0.018799	THCA
GO:0043596	CC	nuclear replication fork	33	1	0.019053	THCA
GO:0036303	BP	lymph vessel morphogenesis	24	1	0.0190659	THCA
GO:0090189	BP	regulation of branching involved in ureteric bud morphogenesis	21	1	0.0191503	THCA
GO:0061733	MF	peptide-lysine-N-acetyltransferase activity	34	1	0.0192083	THCA
GO:0009890	BP	negative regulation of biosynthetic process	1625	4	0.0192223	THCA
GO:0120036	BP	plasma membrane bounded cell projection organization	1484	4	0.0195094	THCA
GO:0060122	BP	inner ear receptor cell stereocilium organization	32	1	0.0197433	THCA
GO:0051146	BP	striated muscle cell differentiation	291	2	0.0198203	THCA
GO:2000647	BP	negative regulation of stem cell proliferation	26	1	0.0198838	THCA
GO:0031954	BP	positive regulation of protein autophosphorylation	27	1	0.0199231	THCA
GO:1902042	BP	negative regulation of extrinsic apoptotic signaling pathway via death domain receptors	31	1	0.0199914	THCA
GO:0006359	BP	regulation of transcription by RNA polymerase III	29	1	0.0200114	THCA
GO:0038083	BP	peptidyl-tyrosine autophosphorylation	21	1	0.0200648	THCA
GO:0042462	BP	eye photoreceptor cell development	35	1	0.0201592	THCA
GO:0002092	BP	positive regulation of receptor internalization	26	1	0.0202451	THCA
GO:0035066	BP	positive regulation of histone acetylation	34	1	0.0206156	THCA
GO:0090312	BP	positive regulation of protein deacetylation	29	1	0.0208102	THCA
GO:0030030	BP	cell projection organization	1523	4	0.0209689	THCA
GO:0060055	BP	angiogenesis involved in wound healing	30	1	0.0210862	THCA
GO:0019222	BP	regulation of metabolic process	6846	8	0.0211739	THCA
GO:0048699	BP	generation of neurons	1435	4	0.0215208	THCA
GO:0031290	BP	retinal ganglion cell axon guidance	22	1	0.0215394	THCA
GO:0051962	BP	positive regulation of nervous system development	276	2	0.0215968	THCA
GO:0008284	BP	positive regulation of cell population proliferation	949	3	0.0218583	THCA
GO:0010631	BP	epithelial cell migration	357	2	0.0221988	THCA
GO:1902531	BP	regulation of intracellular signal transduction	1718	4	0.0222246	THCA
GO:0002052	BP	positive regulation of neuroblast proliferation	28	1	0.0223659	THCA
GO:0051019	MF	mitogen-activated protein kinase binding	28	1	0.022384	THCA
GO:0090132	BP	epithelium migration	359	2	0.0224995	THCA
GO:0007159	BP	leukocyte cell-cell adhesion	400	2	0.0226329	THCA
GO:0007263	BP	nitric oxide mediated signal transduction	28	1	0.022679	THCA
GO:0010647	BP	positive regulation of cell communication	1715	4	0.0227736	THCA
GO:0098609	BP	cell-cell adhesion	932	3	0.022905	THCA
GO:0035767	BP	endothelial cell chemotaxis	30	1	0.0230243	THCA
GO:0023056	BP	positive regulation of signaling	1719	4	0.0230372	THCA
GO:0034212	MF	peptide N-acetyltransferase activity	41	1	0.023066	THCA
GO:0005654	CC	nucleoplasm	4038	6	0.0230786	THCA
GO:0090130	BP	tissue migration	364	2	0.0231372	THCA
GO:0019082	BP	viral protein processing	31	1	0.0235637	THCA
GO:0044788	BP	modulation by host of viral process	45	1	0.0236316	THCA
GO:0007275	BP	multicellular organism development	4804	7	0.0237586	THCA
GO:0044331	BP	cell-cell adhesion mediated by cadherin	27	1	0.0239083	THCA
GO:0060045	BP	positive regulation of cardiac muscle cell proliferation	29	1	0.0240064	THCA
GO:0046329	BP	negative regulation of JNK cascade	38	1	0.0242133	THCA
GO:0031401	BP	positive regulation of protein modification process	971	3	0.0243719	THCA
GO:0001822	BP	kidney development	306	2	0.024464	THCA
GO:0048265	BP	response to pain	29	1	0.0244824	THCA
GO:0002683	BP	negative regulation of immune system process	435	2	0.0244994	THCA
GO:1902533	BP	positive regulation of intracellular signal transduction	991	3	0.0245881	THCA
GO:0051154	BP	negative regulation of striated muscle cell differentiation	40	1	0.0246444	THCA
GO:0045597	BP	positive regulation of cell differentiation	901	3	0.0246974	THCA
GO:0048583	BP	regulation of response to stimulus	3907	6	0.0248591	THCA
GO:0010720	BP	positive regulation of cell development	304	2	0.0248766	THCA
GO:0016032	BP	viral process	404	2	0.0249158	THCA
GO:2000758	BP	positive regulation of peptidyl-lysine acetylation	40	1	0.0251642	THCA
GO:0048679	BP	regulation of axon regeneration	31	1	0.0253501	THCA
GO:0018205	BP	peptidyl-lysine modification	403	2	0.0255574	THCA
GO:0032103	BP	positive regulation of response to external stimulus	445	2	0.0256431	THCA
GO:0140223	MF	general transcription initiation factor activity	50	1	0.0257666	THCA
GO:0035633	BP	maintenance of blood-brain barrier	35	1	0.0258392	THCA
GO:0060119	BP	inner ear receptor cell development	43	1	0.0259586	THCA
GO:0072001	BP	renal system development	315	2	0.026077	THCA
GO:0030224	BP	monocyte differentiation	36	1	0.026148	THCA
GO:0071425	BP	hematopoietic stem cell proliferation	35	1	0.0262541	THCA
GO:0001945	BP	lymph vessel development	31	1	0.0263409	THCA
GO:0035886	BP	vascular associated smooth muscle cell differentiation	40	1	0.0265152	THCA
GO:0007399	BP	nervous system development	2452	5	0.0265466	THCA
GO:0030261	BP	chromosome condensation	49	1	0.0265738	THCA
GO:0055023	BP	positive regulation of cardiac muscle tissue growth	36	1	0.0266067	THCA
GO:0035278	BP	miRNA-mediated gene silencing by inhibition of translation	85	1	0.0266481	THCA
GO:0048638	BP	regulation of developmental growth	326	2	0.0266628	THCA
GO:1905207	BP	regulation of cardiocyte differentiation	34	1	0.0267359	THCA
GO:0035239	BP	tube morphogenesis	928	3	0.0267741	THCA
GO:0051093	BP	negative regulation of developmental process	965	3	0.0269169	THCA
GO:0030334	BP	regulation of cell migration	989	3	0.0272203	THCA
GO:0033554	BP	cellular response to stress	1938	4	0.0273879	THCA
GO:0001569	BP	branching involved in blood vessel morphogenesis	35	1	0.0274065	THCA
GO:0044249	BP	cellular biosynthetic process	5532	7	0.0276631	THCA
GO:0070570	BP	regulation of neuron projection regeneration	34	1	0.0276997	THCA
GO:0031063	BP	regulation of histone deacetylation	44	1	0.0278605	THCA
GO:0006383	BP	transcription by RNA polymerase III	53	1	0.0280743	THCA
GO:0007595	BP	lactation	41	1	0.0282424	THCA
GO:0001046	MF	core promoter sequence-specific DNA binding	41	1	0.0282812	THCA
GO:0018108	BP	peptidyl-tyrosine phosphorylation	366	2	0.0282977	THCA
GO:0070528	BP	protein kinase C signaling	35	1	0.0284324	THCA
GO:0045601	BP	regulation of endothelial cell differentiation	47	1	0.0286206	THCA
GO:0061756	BP	leukocyte adhesion to vascular endothelial cell	55	1	0.0286535	THCA
GO:0018212	BP	peptidyl-tyrosine modification	368	2	0.0287076	THCA
GO:0042461	BP	photoreceptor cell development	50	1	0.0287508	THCA
GO:0051239	BP	regulation of multicellular organismal process	2843	5	0.0292735	THCA
GO:0043618	BP	regulation of transcription from RNA polymerase II promoter in response to stress	39	1	0.0292785	THCA
GO:1901576	BP	organic substance biosynthetic process	5599	7	0.0293677	THCA
GO:0060251	BP	regulation of glial cell proliferation	38	1	0.0298085	THCA
GO:0050678	BP	regulation of epithelial cell proliferation	407	2	0.0298474	THCA
GO:0031346	BP	positive regulation of cell projection organization	348	2	0.0299036	THCA
GO:0032007	BP	negative regulation of TOR signaling	48	1	0.0300182	THCA
GO:0060562	BP	epithelial tube morphogenesis	333	2	0.030151	THCA
GO:0001701	BP	in utero embryonic development	388	2	0.0302325	THCA
GO:1905332	BP	positive regulation of morphogenesis of an epithelium	36	1	0.0303134	THCA
GO:0031952	BP	regulation of protein autophosphorylation	43	1	0.0304183	THCA
GO:0008080	MF	N-acetyltransferase activity	56	1	0.0307154	THCA
GO:0048841	BP	regulation of axon extension involved in axon guidance	33	1	0.0307857	THCA
GO:1901985	BP	positive regulation of protein acetylation	51	1	0.0309665	THCA
GO:2000145	BP	regulation of cell motility	1049	3	0.0310897	THCA
GO:0001754	BP	eye photoreceptor cell differentiation	48	1	0.0311273	THCA
GO:0090183	BP	regulation of kidney development	33	1	0.0312118	THCA
GO:0060421	BP	positive regulation of heart growth	40	1	0.0312579	THCA
GO:1903670	BP	regulation of sprouting angiogenesis	59	1	0.0315317	THCA
GO:0009058	BP	biosynthetic process	5683	7	0.0317664	THCA
GO:1902692	BP	regulation of neuroblast proliferation	40	1	0.0317759	THCA
GO:0032873	BP	negative regulation of stress-activated MAPK cascade	49	1	0.0318827	THCA
GO:0070303	BP	negative regulation of stress-activated protein kinase signaling cascade	49	1	0.0318827	THCA
GO:0031589	BP	cell-substrate adhesion	364	2	0.0320003	THCA
GO:0045860	BP	positive regulation of protein kinase activity	396	2	0.0320168	THCA
GO:0001655	BP	urogenital system development	357	2	0.0322427	THCA
GO:0051130	BP	positive regulation of cellular component organization	1037	3	0.0326271	THCA
GO:0030513	BP	positive regulation of BMP signaling pathway	41	1	0.0328598	THCA
GO:0010762	BP	regulation of fibroblast migration	40	1	0.0331281	THCA
GO:0045773	BP	positive regulation of axon extension	38	1	0.0333005	THCA
GO:1904707	BP	positive regulation of vascular associated smooth muscle cell proliferation	50	1	0.0333207	THCA
GO:0022008	BP	neurogenesis	1649	4	0.0333235	THCA
GO:0030225	BP	macrophage differentiation	51	1	0.0334732	THCA
GO:0043620	BP	regulation of DNA-templated transcription in response to stress	45	1	0.0335367	THCA
GO:0061028	BP	establishment of endothelial barrier	48	1	0.0337305	THCA
GO:0004715	MF	non-membrane spanning protein tyrosine kinase activity	45	1	0.0337775	THCA
GO:1902041	BP	regulation of extrinsic apoptotic signaling pathway via death domain receptors	50	1	0.0338755	THCA
GO:0001937	BP	negative regulation of endothelial cell proliferation	71	1	0.0342486	THCA
GO:0042130	BP	negative regulation of T cell proliferation	66	1	0.0344335	THCA
GO:1900087	BP	positive regulation of G1/S transition of mitotic cell cycle	54	1	0.0345018	THCA
GO:0070897	BP	transcription preinitiation complex assembly	66	1	0.0345308	THCA
GO:0040012	BP	regulation of locomotion	1093	3	0.0347028	THCA
GO:0007566	BP	embryo implantation	55	1	0.0347959	THCA
GO:0038084	BP	vascular endothelial growth factor signaling pathway	47	1	0.0348398	THCA
GO:0042060	BP	wound healing	434	2	0.0349145	THCA
GO:0048846	BP	axon extension involved in axon guidance	37	1	0.0352516	THCA
GO:1902284	BP	neuron projection extension involved in neuron projection guidance	37	1	0.0352516	THCA
GO:0090049	BP	regulation of cell migration involved in sprouting angiogenesis	72	1	0.0356857	THCA
GO:0042692	BP	muscle cell differentiation	405	2	0.0357049	THCA
GO:0002534	BP	cytokine production involved in inflammatory response	74	1	0.0357065	THCA
GO:1900015	BP	regulation of cytokine production involved in inflammatory response	74	1	0.0357065	THCA
GO:0001541	BP	ovarian follicle development	57	1	0.0357187	THCA
GO:0043687	BP	post-translational protein modification	55	1	0.0369995	THCA
GO:0048260	BP	positive regulation of receptor-mediated endocytosis	52	1	0.0370558	THCA
GO:0043114	BP	regulation of vascular permeability	49	1	0.0371259	THCA
GO:0031093	CC	platelet alpha granule lumen	64	1	0.0372132	THCA
GO:0061512	BP	protein localization to cilium	68	1	0.0372989	THCA
GO:0060976	BP	coronary vasculature development	47	1	0.0375947	THCA
GO:0031981	CC	nuclear lumen	4704	6	0.0376156	THCA
GO:0060043	BP	regulation of cardiac muscle cell proliferation	48	1	0.0376488	THCA
GO:0009966	BP	regulation of signal transduction	2966	5	0.0377498	THCA
GO:0071542	BP	dopaminergic neuron differentiation	42	1	0.0379386	THCA
GO:2000112	BP	regulation of cellular macromolecule biosynthetic process	552	2	0.037947	THCA
GO:0050767	BP	regulation of neurogenesis	373	2	0.0379685	THCA
GO:0014009	BP	glial cell proliferation	51	1	0.0381554	THCA
GO:0016070	BP	RNA metabolic process	4664	6	0.0382365	THCA
GO:0048584	BP	positive regulation of response to stimulus	2137	4	0.0383846	THCA
GO:0030857	BP	negative regulation of epithelial cell differentiation	54	1	0.0384831	THCA
GO:0030219	BP	megakaryocyte differentiation	62	1	0.0386496	THCA
GO:0050918	BP	positive chemotaxis	55	1	0.0386695	THCA
GO:0050673	BP	epithelial cell proliferation	474	2	0.038795	THCA
GO:0090311	BP	regulation of protein deacetylation	61	1	0.0390043	THCA
GO:0046622	BP	positive regulation of organ growth	51	1	0.0390194	THCA
GO:0010467	BP	gene expression	6414	7	0.0391141	THCA
GO:0016410	MF	N-acyltransferase activity	80	1	0.039876	THCA
GO:0051496	BP	positive regulation of stress fiber assembly	52	1	0.0398861	THCA
GO:0120163	BP	negative regulation of cold-induced thermogenesis	47	1	0.039897	THCA
GO:0005657	CC	replication fork	65	1	0.0401369	THCA
GO:0006334	BP	nucleosome assembly	96	1	0.0403579	THCA
GO:0000786	CC	nucleosome	112	1	0.0404925	THCA
GO:0060113	BP	inner ear receptor cell differentiation	60	1	0.0408222	THCA
GO:1902808	BP	positive regulation of cell cycle G1/S phase transition	66	1	0.0411218	THCA
GO:0045785	BP	positive regulation of cell adhesion	475	2	0.0411412	THCA
GO:0008347	BP	glial cell migration	55	1	0.0413589	THCA
GO:0046530	BP	photoreceptor cell differentiation	64	1	0.0417205	THCA
GO:0016407	MF	acetyltransferase activity	81	1	0.0421903	THCA
GO:0048010	BP	vascular endothelial growth factor receptor signaling pathway	58	1	0.0423326	THCA
GO:0042054	MF	histone methyltransferase activity	58	1	0.0425412	THCA
GO:0031103	BP	axon regeneration	54	1	0.0428808	THCA
GO:0051851	BP	modulation by host of symbiont process	79	1	0.0430115	THCA
GO:0010718	BP	positive regulation of epithelial to mesenchymal transition	55	1	0.0432753	THCA
GO:0060688	BP	regulation of morphogenesis of a branching structure	51	1	0.043306	THCA
GO:0050840	MF	extracellular matrix binding	56	1	0.043377	THCA
GO:0044271	BP	cellular nitrogen compound biosynthetic process	4615	6	0.0434247	THCA
GO:0043536	BP	positive regulation of blood vessel endothelial cell migration	71	1	0.0443307	THCA
GO:0010761	BP	fibroblast migration	55	1	0.0446048	THCA
GO:0035295	BP	tube development	1138	3	0.0448668	THCA
GO:0050672	BP	negative regulation of lymphocyte proliferation	83	1	0.0448845	THCA
GO:2000179	BP	positive regulation of neural precursor cell proliferation	55	1	0.0449038	THCA
GO:0002090	BP	regulation of receptor internalization	58	1	0.0449133	THCA
GO:0035065	BP	regulation of histone acetylation	65	1	0.0450323	THCA
GO:0032945	BP	negative regulation of mononuclear cell proliferation	84	1	0.0450437	THCA
GO:0002532	BP	production of molecular mediator involved in inflammatory response	94	1	0.0450506	THCA
GO:0042490	BP	mechanoreceptor differentiation	65	1	0.0452483	THCA
GO:0034332	BP	adherens junction organization	50	1	0.045259	THCA
GO:0005080	MF	protein kinase C binding	55	1	0.0455553	THCA
GO:0048008	BP	platelet-derived growth factor receptor signaling pathway	58	1	0.0456953	THCA
GO:0033674	BP	positive regulation of kinase activity	472	2	0.0457094	THCA
GO:0043154	BP	negative regulation of cysteine-type endopeptidase activity involved in apoptotic process	76	1	0.0458842	THCA
GO:0051148	BP	negative regulation of muscle cell differentiation	68	1	0.0461426	THCA
GO:0032233	BP	positive regulation of actin filament bundle assembly	62	1	0.0463919	THCA
GO:0055021	BP	regulation of cardiac muscle tissue growth	67	1	0.0464969	THCA
GO:1902532	BP	negative regulation of intracellular signal transduction	535	2	0.0465617	THCA
GO:0001885	BP	endothelial cell development	65	1	0.046882	THCA
GO:0006355	BP	regulation of DNA-templated transcription	3262	5	0.0469218	THCA
GO:1903506	BP	regulation of nucleic acid-templated transcription	3264	5	0.0469739	THCA
GO:2001141	BP	regulation of RNA biosynthetic process	3273	5	0.047351	THCA
GO:0060429	BP	epithelium development	1182	3	0.0476264	THCA
GO:0060038	BP	cardiac muscle cell proliferation	60	1	0.0476856	THCA
GO:0009790	BP	embryo development	1118	3	0.0481073	THCA
GO:0034708	CC	methyltransferase complex	90	1	0.0482406	THCA
GO:0031102	BP	neuron projection regeneration	61	1	0.0482428	THCA
GO:0044089	BP	positive regulation of cellular component biogenesis	492	2	0.0483463	THCA
GO:0002042	BP	cell migration involved in sprouting angiogenesis	88	1	0.048729	THCA
GO:0002690	BP	positive regulation of leukocyte chemotaxis	92	1	0.0489417	THCA
GO:0070664	BP	negative regulation of leukocyte proliferation	91	1	0.0492863	THCA
GO:0043966	BP	histone H3 acetylation	78	1	0.0495116	THCA
GO:0035924	BP	cellular response to vascular endothelial growth factor stimulus	71	1	0.0495781	THCA

## Sheet: BLCA
ID	ONTOLOGY	TERM	N	DE	P.DE	Cancer
GO:0002505	BP	antigen processing and presentation of polysaccharide antigen via MHC class II	1	1	0.00048061	BLCA
GO:0002747	BP	antigen processing and presentation following phagocytosis	1	1	0.00048061	BLCA
GO:0046754	BP	viral exocytosis	1	1	0.00048061	BLCA
GO:0008333	BP	endosome to lysosome transport	70	2	0.000489557	BLCA
GO:0007040	BP	lysosome organization	97	2	0.000776042	BLCA
GO:0080171	BP	lytic vacuole organization	97	2	0.000776042	BLCA
GO:0030221	BP	basophil differentiation	2	1	0.000872925	BLCA
GO:0090117	BP	endosome to lysosome transport of low-density lipoprotein particle	2	1	0.00127502	BLCA
GO:0005607	CC	laminin-2 complex	2	1	0.00138973	BLCA
GO:0101004	CC	cytolytic granule membrane	3	1	0.00141117	BLCA
GO:0007041	BP	lysosomal transport	125	2	0.00159024	BLCA
GO:1990927	BP	calcium ion regulated lysosome exocytosis	3	1	0.00170479	BLCA
GO:0007034	BP	vacuolar transport	158	2	0.00246645	BLCA
GO:0070695	CC	FHF complex	5	1	0.00248431	BLCA
GO:1905198	BP	manchette assembly	5	1	0.00263982	BLCA
GO:0016482	BP	cytosolic transport	164	2	0.00268286	BLCA
GO:0090119	BP	vesicle-mediated cholesterol transport	5	1	0.00295093	BLCA
GO:0030496	CC	midbody	200	2	0.00358931	BLCA
GO:0007033	BP	vacuole organization	210	2	0.00377112	BLCA
GO:0061909	BP	autophagosome-lysosome fusion	9	1	0.00442889	BLCA
GO:0030705	BP	cytoskeleton-dependent intracellular transport	203	2	0.00444438	BLCA
GO:1905719	BP	protein localization to perinuclear region of cytoplasm	9	1	0.00449467	BLCA
GO:0044194	CC	cytolytic granule	13	1	0.00536709	BLCA
GO:0046753	BP	non-lytic viral release	14	1	0.00609252	BLCA
GO:0090385	BP	phagosome-lysosome fusion	13	1	0.00619762	BLCA
GO:0008526	MF	phosphatidylinositol transfer activity	10	1	0.00620579	BLCA
GO:1905269	BP	positive regulation of chromatin organization	17	1	0.00702971	BLCA
GO:0043256	CC	laminin complex	12	1	0.00778276	BLCA
GO:1902774	BP	late endosome to lysosome transport	21	1	0.00785746	BLCA
GO:0001845	BP	phagolysosome assembly	18	1	0.00851078	BLCA
GO:0008525	MF	phosphatidylcholine transporter activity	17	1	0.00961183	BLCA
GO:0016050	BP	vesicle organization	344	2	0.0100952	BLCA
GO:0070300	MF	phosphatidic acid binding	20	1	0.0103011	BLCA
GO:0120014	MF	phospholipid transfer activity	25	1	0.0117496	BLCA
GO:0035162	BP	embryonic hemopoiesis	24	1	0.0125531	BLCA
GO:0015631	MF	tubulin binding	369	2	0.0129003	BLCA
GO:0090382	BP	phagosome maturation	27	1	0.0131826	BLCA
GO:0032367	BP	intracellular cholesterol transport	29	1	0.0133852	BLCA
GO:0006869	BP	lipid transport	427	2	0.0135098	BLCA
GO:0019076	BP	viral release from host cell	27	1	0.0136461	BLCA
GO:0035891	BP	exit from host cell	27	1	0.0136461	BLCA
GO:0031210	MF	phosphatidylcholine binding	30	1	0.0138778	BLCA
GO:0051959	MF	dynein light intermediate chain binding	24	1	0.0141126	BLCA
GO:0002504	BP	antigen processing and presentation of peptide or polysaccharide antigen via MHC class II	32	1	0.0147767	BLCA
GO:0001778	BP	plasma membrane repair	29	1	0.0148102	BLCA
GO:0032366	BP	intracellular sterol transport	32	1	0.0150759	BLCA
GO:0043014	MF	alpha-tubulin binding	37	1	0.0165439	BLCA
GO:0045648	BP	positive regulation of erythrocyte differentiation	34	1	0.0165712	BLCA
GO:0051233	CC	spindle midzone	35	1	0.0168221	BLCA
GO:0010876	BP	lipid localization	475	2	0.0170143	BLCA
GO:1902275	BP	regulation of chromatin organization	43	1	0.0174852	BLCA
GO:0003925	MF	G protein activity	40	1	0.0177679	BLCA
GO:0008045	BP	motor neuron axon guidance	30	1	0.0178112	BLCA
GO:0050997	MF	quaternary ammonium group binding	40	1	0.0185685	BLCA
GO:0007602	BP	phototransduction	45	1	0.0187158	BLCA
GO:0030851	BP	granulocyte differentiation	38	1	0.0189979	BLCA
GO:0048487	MF	beta-tubulin binding	40	1	0.0196026	BLCA
GO:0032365	BP	intracellular lipid transport	47	1	0.0201481	BLCA
GO:0045022	BP	early endosome to late endosome transport	42	1	0.0202581	BLCA
GO:0098927	BP	vesicle-mediated transport between endosomal compartments	45	1	0.0222616	BLCA
GO:0034707	CC	chloride channel complex	52	1	0.0234555	BLCA
GO:0042267	BP	natural killer cell mediated cytotoxicity	65	1	0.0236307	BLCA
GO:0120009	BP	intermembrane lipid transfer	50	1	0.0241689	BLCA
GO:0120013	MF	lipid transfer activity	50	1	0.0241689	BLCA
GO:0045646	BP	regulation of erythrocyte differentiation	47	1	0.0245003	BLCA
GO:0002228	BP	natural killer cell mediated immunity	68	1	0.0247758	BLCA
GO:0008089	BP	anterograde axonal transport	49	1	0.0255586	BLCA
GO:0009583	BP	detection of light stimulus	64	1	0.0267665	BLCA
GO:0015031	BP	protein transport	1513	3	0.026892	BLCA
GO:0070888	MF	E-box binding	48	1	0.0269064	BLCA
GO:0010256	BP	endomembrane system organization	569	2	0.0270327	BLCA
GO:0032154	CC	cleavage furrow	52	1	0.0271835	BLCA
GO:0030219	BP	megakaryocyte differentiation	62	1	0.0285459	BLCA
GO:0019003	MF	GDP binding	71	1	0.0293417	BLCA
GO:0005548	MF	phospholipid transporter activity	63	1	0.0314598	BLCA
GO:0045184	BP	establishment of protein localization	1620	3	0.0324516	BLCA
GO:0051301	BP	cell division	629	2	0.0325842	BLCA
GO:1904115	CC	axon cytoplasm	62	1	0.0326232	BLCA
GO:0031122	BP	cytoplasmic microtubule organization	62	1	0.0329241	BLCA
GO:0098930	BP	axonal transport	64	1	0.0340262	BLCA
GO:0032580	CC	Golgi cisterna membrane	72	1	0.0347292	BLCA
GO:0032418	BP	lysosome localization	81	1	0.0349286	BLCA
GO:1990849	BP	vacuolar localization	81	1	0.0349286	BLCA
GO:0017156	BP	calcium-ion regulated exocytosis	65	1	0.0351678	BLCA
GO:0005254	MF	chloride channel activity	78	1	0.0358504	BLCA
GO:0032153	CC	cell division site	70	1	0.0365514	BLCA
GO:0030971	MF	receptor tyrosine kinase binding	74	1	0.0367624	BLCA
GO:0005253	MF	anion channel activity	88	1	0.0402839	BLCA
GO:0008088	BP	axo-dendritic transport	77	1	0.0406288	BLCA
GO:0051781	BP	positive regulation of cell division	89	1	0.0406311	BLCA
GO:0007032	BP	endosome organization	93	1	0.040822	BLCA
GO:0001909	BP	leukocyte mediated cytotoxicity	119	1	0.0417861	BLCA
GO:0005811	CC	lipid droplet	101	1	0.0438761	BLCA
GO:2001252	BP	positive regulation of chromosome organization	103	1	0.044232	BLCA
GO:0019882	BP	antigen processing and presentation	101	1	0.044845	BLCA
GO:0120111	CC	neuron projection cytoplasm	90	1	0.0462962	BLCA
GO:0045639	BP	positive regulation of myeloid cell differentiation	102	1	0.0465017	BLCA
GO:1902476	BP	chloride transmembrane transport	101	1	0.0481162	BLCA
GO:0031985	CC	Golgi cisterna	100	1	0.0482956	BLCA
GO:0015914	BP	phospholipid transport	103	1	0.0483723	BLCA

## Sheet: HNSC
ID	ONTOLOGY	TERM	N	DE	P.DE	Cancer
GO:1902117	BP	positive regulation of organelle assembly	82	6	0.00106279	HNSC
GO:0060764	BP	cell-cell signaling involved in mammary gland development	2	2	0.00141336	HNSC
GO:0099578	BP	regulation of translation at postsynapse, modulating synaptic transmission	3	2	0.00176753	HNSC
GO:0140245	BP	regulation of translation at postsynapse	3	2	0.00176753	HNSC
GO:0033962	BP	P-body assembly	20	3	0.00206612	HNSC
GO:0034634	MF	glutathione transmembrane transporter activity	5	2	0.002976	HNSC
GO:0051649	BP	establishment of localization in cell	2038	43	0.00337773	HNSC
GO:0042937	MF	tripeptide transmembrane transporter activity	6	2	0.00398221	HNSC
GO:0043250	MF	sodium-dependent organic anion transmembrane transporter activity	1	1	0.00406832	HNSC
GO:0043251	BP	sodium-dependent organic anion transport	1	1	0.00406832	HNSC
GO:0086056	MF	voltage-gated calcium channel activity involved in AV node cell action potential	3	2	0.00408224	HNSC
GO:0060337	BP	type I interferon signaling pathway	61	4	0.0042889	HNSC
GO:0050839	MF	cell adhesion molecule binding	552	18	0.00444301	HNSC
GO:0071357	BP	cellular response to type I interferon	63	4	0.00446878	HNSC
GO:0034775	BP	glutathione transmembrane transport	7	2	0.00463943	HNSC
GO:0046907	BP	intracellular transport	1524	33	0.00481948	HNSC
GO:0099547	BP	regulation of translation at synapse, modulating synaptic transmission	5	2	0.00491467	HNSC
GO:0140243	BP	regulation of translation at synapse	5	2	0.00491467	HNSC
GO:0017124	MF	SH3 domain binding	123	7	0.00544753	HNSC
GO:0004653	MF	polypeptide N-acetylgalactosaminyltransferase activity	19	3	0.00573062	HNSC
GO:0055118	BP	negative regulation of cardiac muscle contraction	6	2	0.00573654	HNSC
GO:0070899	BP	mitochondrial tRNA wobble uridine modification	1	1	0.00578087	HNSC
GO:0016241	BP	regulation of macroautophagy	159	7	0.00579694	HNSC
GO:0035443	BP	tripeptide transmembrane transport	8	2	0.00582719	HNSC
GO:0048471	CC	perinuclear region of cytoplasm	719	20	0.00587981	HNSC
GO:1902115	BP	regulation of organelle assembly	201	8	0.00596644	HNSC
GO:0097753	BP	membrane bending	1	1	0.00622851	HNSC
GO:1903076	BP	regulation of protein localization to plasma membrane	102	6	0.00641929	HNSC
GO:0045296	MF	cadherin binding	330	12	0.00659093	HNSC
GO:0034635	BP	glutathione transport	9	2	0.00672061	HNSC
GO:0019107	MF	myristoyltransferase activity	11	2	0.00678742	HNSC
GO:0004398	MF	histidine decarboxylase activity	1	1	0.00694188	HNSC
GO:0034340	BP	response to type I interferon	69	4	0.00720034	HNSC
GO:0060627	BP	regulation of vesicle-mediated transport	536	16	0.00734311	HNSC
GO:0018685	MF	alkane 1-monooxygenase activity	3	1	0.00744277	HNSC
GO:0051020	MF	GTPase binding	301	11	0.0075552	HNSC
GO:0006294	BP	nucleotide-excision repair, preincision complex assembly	1	1	0.00784757	HNSC
GO:0042939	BP	tripeptide transport	10	2	0.00810198	HNSC
GO:0004363	MF	glutathione synthase activity	1	1	0.00810412	HNSC
GO:1904091	MF	non-ribosomal peptide synthetase activity	1	1	0.00810412	HNSC
GO:0051463	BP	negative regulation of cortisol secretion	1	1	0.00820735	HNSC
GO:0060125	BP	negative regulation of growth hormone secretion	1	1	0.00820735	HNSC
GO:0005895	CC	interleukin-5 receptor complex	1	1	0.00822255	HNSC
GO:0015362	MF	high-affinity sodium:dicarboxylate symporter activity	1	1	0.00823591	HNSC
GO:0045932	BP	negative regulation of muscle contraction	25	3	0.00846924	HNSC
GO:0022010	BP	central nervous system myelination	24	3	0.00868452	HNSC
GO:0032291	BP	axon ensheathment in central nervous system	24	3	0.00868452	HNSC
GO:0001694	BP	histamine biosynthetic process	2	1	0.00909321	HNSC
GO:0004954	MF	prostanoid receptor activity	11	2	0.00910318	HNSC
GO:0022400	BP	regulation of rhodopsin mediated signaling pathway	10	2	0.00945425	HNSC
GO:0086096	BP	adenylate cyclase-inhibiting adrenergic receptor signaling pathway involved in heart process	2	1	0.00948333	HNSC
GO:0140193	BP	regulation of adenylate cyclase-inhibiting adrenergic receptor signaling pathway involved in heart process	2	1	0.00948333	HNSC
GO:0045988	BP	negative regulation of striated muscle contraction	8	2	0.00993218	HNSC
GO:0031267	MF	small GTPase binding	270	10	0.0101016	HNSC
GO:0001918	MF	farnesylated protein binding	1	1	0.0106404	HNSC
GO:0086045	BP	membrane depolarization during AV node cell action potential	6	2	0.0107918	HNSC
GO:0031082	CC	BLOC complex	14	2	0.0108281	HNSC
GO:0071877	BP	regulation of adenylate cyclase-inhibiting adrenergic receptor signaling pathway	3	1	0.0108312	HNSC
GO:0086007	MF	voltage-gated calcium channel activity involved in cardiac muscle cell action potential	5	2	0.0108438	HNSC
GO:0016281	CC	eukaryotic translation initiation factor 4F complex	12	2	0.0108807	HNSC
GO:0000932	CC	P-body	95	5	0.0109789	HNSC
GO:0005137	MF	interleukin-5 receptor binding	2	1	0.0110229	HNSC
GO:0031641	BP	regulation of myelination	48	4	0.0112513	HNSC
GO:0010626	BP	negative regulation of Schwann cell proliferation	8	2	0.0115132	HNSC
GO:0004953	MF	icosanoid receptor activity	15	2	0.0116181	HNSC
GO:0070931	CC	Golgi-associated vesicle lumen	1	1	0.0116495	HNSC
GO:0006930	BP	substrate-dependent cell migration, cell extension	9	2	0.0117516	HNSC
GO:0097550	CC	transcription preinitiation complex	11	2	0.0120691	HNSC
GO:0046725	BP	negative regulation by virus of viral protein levels in host cell	1	1	0.012193	HNSC
GO:0072308	BP	negative regulation of metanephric nephron tubule epithelial cell differentiation	1	1	0.012193	HNSC
GO:0045736	BP	negative regulation of cyclin-dependent protein serine/threonine kinase activity	33	3	0.0123611	HNSC
GO:1904030	BP	negative regulation of cyclin-dependent protein kinase activity	33	3	0.0123611	HNSC
GO:2000521	BP	negative regulation of immunological synapse formation	2	1	0.0124295	HNSC
GO:0016056	BP	rhodopsin mediated signaling pathway	14	2	0.0126193	HNSC
GO:0035265	BP	organ growth	177	8	0.0130431	HNSC
GO:0014013	BP	regulation of gliogenesis	107	6	0.0130444	HNSC
GO:0033292	BP	T-tubule organization	9	2	0.0132355	HNSC
GO:0043547	BP	positive regulation of GTPase activity	260	10	0.0134129	HNSC
GO:0033235	BP	positive regulation of protein sumoylation	12	2	0.0135992	HNSC
GO:0035673	MF	oligopeptide transmembrane transporter activity	11	2	0.0139874	HNSC
GO:0030315	CC	T-tubule	52	4	0.014068	HNSC
GO:0070381	CC	endosome to plasma membrane transport vesicle	2	1	0.0143901	HNSC
GO:0006886	BP	intracellular protein transport	838	19	0.0146001	HNSC
GO:0035578	CC	azurophil granule lumen	83	4	0.0147387	HNSC
GO:0010624	BP	regulation of Schwann cell proliferation	11	2	0.0148959	HNSC
GO:0014010	BP	Schwann cell proliferation	11	2	0.0148959	HNSC
GO:0032879	BP	regulation of localization	2099	43	0.0149686	HNSC
GO:2001189	BP	negative regulation of T cell activation via T cell receptor contact with antigen bound to MHC molecule on antigen presenting cell	3	1	0.0150459	HNSC
GO:0030326	BP	embryonic limb morphogenesis	118	7	0.0153063	HNSC
GO:0035113	BP	embryonic appendage morphogenesis	118	7	0.0153063	HNSC
GO:0030100	BP	regulation of endocytosis	208	8	0.0157548	HNSC
GO:0005845	CC	mRNA cap binding complex	12	2	0.0158376	HNSC
GO:0034518	CC	RNA cap binding complex	12	2	0.0158376	HNSC
GO:1901524	BP	regulation of mitophagy	12	2	0.0161666	HNSC
GO:1904375	BP	regulation of protein localization to cell periphery	124	6	0.0162621	HNSC
GO:0004958	MF	prostaglandin F receptor activity	2	1	0.0165334	HNSC
GO:0030955	MF	potassium ion binding	12	2	0.0165521	HNSC
GO:0016239	BP	positive regulation of macroautophagy	74	4	0.016871	HNSC
GO:0001540	MF	amyloid-beta binding	84	5	0.0169452	HNSC
GO:0008277	BP	regulation of G protein-coupled receptor signaling pathway	134	6	0.0172223	HNSC
GO:0022011	BP	myelination in peripheral nervous system	29	3	0.0174762	HNSC
GO:0032292	BP	peripheral nervous system axon ensheathment	29	3	0.0174762	HNSC
GO:0031085	CC	BLOC-3 complex	2	1	0.0182424	HNSC
GO:0004379	MF	glycylpeptide N-tetradecanoyltransferase activity	2	1	0.0183612	HNSC
GO:0018008	BP	N-terminal peptidyl-glycine N-myristoylation	2	1	0.0183612	HNSC
GO:0018030	MF	peptidyl-lysine N6-myristoyltransferase activity	2	1	0.0183612	HNSC
GO:0016192	BP	vesicle-mediated transport	1504	32	0.0183808	HNSC
GO:0016242	BP	negative regulation of macroautophagy	35	3	0.0184806	HNSC
GO:0031295	BP	T cell costimulation	42	3	0.018676	HNSC
GO:0098894	CC	extrinsic component of presynaptic endocytic zone membrane	2	1	0.018721	HNSC
GO:0071881	BP	adenylate cyclase-inhibiting adrenergic receptor signaling pathway	4	1	0.018809	HNSC
GO:0090235	BP	regulation of metaphase plate congression	13	2	0.0188435	HNSC
GO:0035456	BP	response to interferon-beta	29	2	0.0193244	HNSC
GO:0005674	CC	transcription factor TFIIF complex	2	1	0.0193713	HNSC
GO:0008798	MF	beta-aspartyl-peptidase activity	2	1	0.0195439	HNSC
GO:1905475	BP	regulation of protein localization to membrane	170	7	0.0198038	HNSC
GO:0031294	BP	lymphocyte costimulation	44	3	0.0198084	HNSC
GO:0034057	MF	RNA strand-exchange activity	2	1	0.019883	HNSC
GO:0003340	BP	negative regulation of mesenchymal to epithelial transition involved in metanephros morphogenesis	2	1	0.0201597	HNSC
GO:0014044	BP	Schwann cell development	32	3	0.0203497	HNSC
GO:0070285	BP	pigment cell development	1	1	0.0203554	HNSC
GO:0004307	MF	ethanolaminephosphotransferase activity	3	1	0.0203897	HNSC
GO:0035672	BP	oligopeptide transmembrane transport	15	2	0.020478	HNSC
GO:0021895	BP	cerebral cortex neuron differentiation	27	3	0.0204829	HNSC
GO:1990454	CC	L-type voltage-gated calcium channel complex	11	2	0.0206036	HNSC
GO:0097494	BP	regulation of vesicle size	18	2	0.0207754	HNSC
GO:0055017	BP	cardiac muscle tissue growth	91	5	0.0208405	HNSC
GO:0042010	MF	interleukin-15 receptor activity	3	1	0.0213119	HNSC
GO:0050765	BP	negative regulation of phagocytosis	22	2	0.0214148	HNSC
GO:0002053	BP	positive regulation of mesenchymal cell proliferation	23	3	0.0214437	HNSC
GO:0030234	MF	enzyme regulator activity	1189	26	0.0214682	HNSC
GO:0005766	CC	primary lysosome	144	5	0.0215214	HNSC
GO:0042582	CC	azurophil granule	144	5	0.0215214	HNSC
GO:1902959	BP	regulation of aspartic-type endopeptidase activity involved in amyloid precursor protein catabolic process	10	2	0.021623	HNSC
GO:0001785	MF	prostaglandin J receptor activity	2	1	0.0221974	HNSC
GO:0004956	MF	prostaglandin D receptor activity	2	1	0.0221974	HNSC
GO:0021998	BP	neural plate mediolateral regionalization	1	1	0.0225866	HNSC
GO:0048338	BP	mesoderm structural organization	1	1	0.0225866	HNSC
GO:0048352	BP	paraxial mesoderm structural organization	1	1	0.0225866	HNSC
GO:0048372	BP	lateral mesodermal cell fate commitment	1	1	0.0225866	HNSC
GO:0048377	BP	lateral mesodermal cell fate specification	1	1	0.0225866	HNSC
GO:0048378	BP	regulation of lateral mesodermal cell fate specification	1	1	0.0225866	HNSC
GO:1904412	BP	regulation of cardiac ventricle development	1	1	0.0225866	HNSC
GO:1904414	BP	positive regulation of cardiac ventricle development	1	1	0.0225866	HNSC
GO:1905285	BP	fibrous ring of heart morphogenesis	1	1	0.0225866	HNSC
GO:0016266	BP	O-glycan processing	42	3	0.0232806	HNSC
GO:0000340	MF	RNA 7-methylguanosine cap binding	12	2	0.0234999	HNSC
GO:0031370	MF	eukaryotic initiation factor 4G binding	1	1	0.0235034	HNSC
GO:0018343	BP	protein farnesylation	3	1	0.0236603	HNSC
GO:0070721	CC	ISGF3 complex	3	1	0.0238069	HNSC
GO:0031410	CC	cytoplasmic vesicle	2411	44	0.0240168	HNSC
GO:0060325	BP	face morphogenesis	29	3	0.0241877	HNSC
GO:0006857	BP	oligopeptide transport	17	2	0.0242434	HNSC
GO:0009895	BP	negative regulation of catabolic process	320	10	0.024548	HNSC
GO:0050999	BP	regulation of nitric-oxide synthase activity	40	3	0.0246192	HNSC
GO:0097708	CC	intracellular vesicle	2414	44	0.0247201	HNSC
GO:0042277	MF	peptide binding	301	9	0.0247633	HNSC
GO:0046323	BP	glucose import	74	4	0.0249692	HNSC
GO:0086016	BP	AV node cell action potential	11	2	0.0251432	HNSC
GO:0086027	BP	AV node cell to bundle of His cell signaling	11	2	0.0251432	HNSC
GO:1905937	BP	negative regulation of germ cell proliferation	4	1	0.0251779	HNSC
GO:2000255	BP	negative regulation of male germ cell proliferation	4	1	0.0251779	HNSC
GO:0070966	BP	nuclear-transcribed mRNA catabolic process, no-go decay	3	1	0.0253448	HNSC
GO:0005096	MF	GTPase activator activity	247	9	0.0253569	HNSC
GO:0099170	BP	postsynaptic modulation of chemical synaptic transmission	16	2	0.0253719	HNSC
GO:0021892	BP	cerebral cortex GABAergic interneuron differentiation	11	2	0.0256488	HNSC
GO:1905245	BP	regulation of aspartic-type peptidase activity	12	2	0.0262173	HNSC
GO:0008376	MF	acetylgalactosaminyltransferase activity	34	3	0.0263631	HNSC
GO:0031420	MF	alkali metal ion binding	17	2	0.0265427	HNSC
GO:0008384	MF	IkappaB kinase activity	3	1	0.0266266	HNSC
GO:0007422	BP	peripheral nervous system development	81	5	0.0266733	HNSC
GO:0060038	BP	cardiac muscle cell proliferation	60	4	0.0267573	HNSC
GO:0018201	BP	peptidyl-glycine modification	4	1	0.0270636	HNSC
GO:0030695	MF	GTPase regulator activity	455	14	0.0272696	HNSC
GO:0060589	MF	nucleoside-triphosphatase regulator activity	455	14	0.0272696	HNSC
GO:0042866	BP	pyruvate biosynthetic process	4	1	0.0273403	HNSC
GO:0098911	BP	regulation of ventricular cardiac muscle cell action potential	12	2	0.027408	HNSC
GO:0086067	BP	AV node cell to bundle of His cell communication	12	2	0.0274687	HNSC
GO:0048259	BP	regulation of receptor-mediated endocytosis	111	5	0.0275279	HNSC
GO:0004960	MF	thromboxane receptor activity	1	1	0.0276123	HNSC
GO:0004961	MF	thromboxane A2 receptor activity	1	1	0.0276123	HNSC
GO:0038193	BP	thromboxane A2 signaling pathway	1	1	0.0276123	HNSC
GO:0017153	MF	sodium:dicarboxylate symporter activity	3	1	0.0277521	HNSC
GO:0098529	BP	neuromuscular junction development, skeletal muscle fiber	1	1	0.0286939	HNSC
GO:0004743	MF	pyruvate kinase activity	2	1	0.0288179	HNSC
GO:0050000	BP	chromosome localization	88	4	0.0288341	HNSC
GO:0002509	BP	central tolerance induction to self antigen	1	1	0.0290095	HNSC
GO:0098686	CC	hippocampal mossy fiber to CA3 synapse	34	3	0.0290372	HNSC
GO:0019863	MF	IgE binding	5	1	0.0291151	HNSC
GO:0033277	BP	abortive mitotic cell cycle	2	1	0.0293079	HNSC
GO:0042552	BP	myelination	142	6	0.0300073	HNSC
GO:1900739	BP	regulation of protein insertion into mitochondrial membrane involved in apoptotic signaling pathway	4	1	0.0302353	HNSC
GO:1900740	BP	positive regulation of protein insertion into mitochondrial membrane involved in apoptotic signaling pathway	4	1	0.0302353	HNSC
GO:0099503	CC	secretory vesicle	1020	20	0.0302833	HNSC
GO:0021541	BP	ammon gyrus development	1	1	0.0304773	HNSC
GO:0004800	MF	thyroxine 5'-deiodinase activity	3	1	0.0305004	HNSC
GO:0072571	MF	mono-ADP-D-ribose binding	1	1	0.0310322	HNSC
GO:0034205	BP	amyloid-beta formation	54	3	0.0312482	HNSC
GO:0021772	BP	olfactory bulb development	33	3	0.0314254	HNSC
GO:0014067	BP	negative regulation of phosphatidylinositol 3-kinase signaling	17	2	0.0315533	HNSC
GO:0032153	CC	cell division site	70	4	0.0317292	HNSC
GO:0001772	CC	immunological synapse	45	3	0.0318444	HNSC
GO:0007272	BP	ensheathment of neurons	144	6	0.0318806	HNSC
GO:0008366	BP	axon ensheathment	144	6	0.0318806	HNSC
GO:0010862	BP	positive regulation of pathway-restricted SMAD protein phosphorylation	49	3	0.0320302	HNSC
GO:0015139	MF	alpha-ketoglutarate transmembrane transporter activity	3	1	0.0323245	HNSC
GO:0070820	CC	tertiary granule	161	5	0.0325017	HNSC
GO:0007603	BP	phototransduction, visible light	20	2	0.0326331	HNSC
GO:1905953	BP	negative regulation of lipid localization	65	3	0.0327389	HNSC
GO:0005667	CC	transcription regulator complex	492	14	0.0329095	HNSC
GO:0098858	CC	actin-based cell projection	221	8	0.032981	HNSC
GO:0060033	BP	anatomical structure regression	16	2	0.0330059	HNSC
GO:0060987	CC	lipid tube	1	1	0.0330209	HNSC
GO:0106135	BP	negative regulation of cardiac muscle cell contraction	1	1	0.0330209	HNSC
GO:1903946	BP	negative regulation of ventricular cardiac muscle cell action potential	1	1	0.0330209	HNSC
GO:0006610	BP	ribosomal protein import into nucleus	4	1	0.0330784	HNSC
GO:0014037	BP	Schwann cell differentiation	38	3	0.0331571	HNSC
GO:0100002	BP	negative regulation of protein kinase activity by protein phosphorylation	1	1	0.0333088	HNSC
GO:0051758	BP	homologous chromosome movement towards spindle pole in meiosis I anaphase	1	1	0.0334441	HNSC
GO:0008121	MF	ubiquinol-cytochrome-c reductase activity	5	1	0.0336952	HNSC
GO:0099003	BP	vesicle-mediated transport in synapse	210	8	0.0337931	HNSC
GO:0060419	BP	heart growth	100	5	0.0343943	HNSC
GO:0061582	BP	intestinal epithelial cell migration	2	1	0.0344242	HNSC
GO:0008508	MF	bile acid:sodium symporter activity	6	1	0.0344894	HNSC
GO:0002458	BP	peripheral T cell tolerance induction	2	1	0.0347929	HNSC
GO:0006499	BP	N-terminal protein myristoylation	4	1	0.0349992	HNSC
GO:0018377	BP	protein myristoylation	4	1	0.0349992	HNSC
GO:0035107	BP	appendage morphogenesis	142	7	0.0351615	HNSC
GO:0035108	BP	limb morphogenesis	142	7	0.0351615	HNSC
GO:0060391	BP	positive regulation of SMAD protein signal transduction	18	2	0.0353243	HNSC
GO:0060251	BP	regulation of glial cell proliferation	39	3	0.0354013	HNSC
GO:0014015	BP	positive regulation of gliogenesis	69	4	0.0355592	HNSC
GO:0042733	BP	embryonic digit morphogenesis	56	4	0.0357482	HNSC
GO:0007252	BP	I-kappaB phosphorylation	21	2	0.0357576	HNSC
GO:1902683	BP	regulation of receptor localization to synapse	18	2	0.0357701	HNSC
GO:0045806	BP	negative regulation of endocytosis	56	3	0.0360637	HNSC
GO:0021988	BP	olfactory lobe development	35	3	0.0360823	HNSC
GO:1904680	MF	peptide transmembrane transporter activity	15	2	0.036112	HNSC
GO:0097536	BP	thymus epithelium morphogenesis	2	1	0.0361529	HNSC
GO:0098793	CC	presynapse	517	15	0.0362038	HNSC
GO:0086103	BP	G protein-coupled receptor signaling pathway involved in heart process	18	2	0.0362494	HNSC
GO:0038025	MF	reelin receptor activity	2	1	0.0364671	HNSC
GO:0010816	BP	calcitonin catabolic process	1	1	0.0365727	HNSC
GO:0034959	BP	endothelin maturation	1	1	0.0365727	HNSC
GO:0000339	MF	RNA cap binding	18	2	0.036578	HNSC
GO:0035494	BP	SNARE complex disassembly	3	1	0.0366086	HNSC
GO:0004857	MF	enzyme inhibitor activity	378	9	0.0368254	HNSC
GO:0005483	MF	soluble NSF attachment protein activity	3	1	0.0368711	HNSC
GO:0060155	BP	platelet dense granule organization	24	2	0.0372076	HNSC
GO:1904766	BP	negative regulation of macroautophagy by TORC1 signaling	1	1	0.037325	HNSC
GO:0010045	BP	response to nickel cation	1	1	0.0376504	HNSC
GO:0008446	MF	GDP-mannose 4,6-dehydratase activity	1	1	0.0380445	HNSC
GO:0060323	BP	head morphogenesis	35	3	0.0381883	HNSC
GO:0072382	BP	minus-end-directed vesicle transport along microtubule	1	1	0.0383019	HNSC
GO:1903829	BP	positive regulation of protein localization	446	12	0.0385574	HNSC
GO:0009950	BP	dorsal/ventral axis specification	12	2	0.0386083	HNSC
GO:0090725	CC	peripheral region of growth cone	1	1	0.0386277	HNSC
GO:0030141	CC	secretory granule	851	16	0.0386696	HNSC
GO:0072570	MF	ADP-D-ribose binding	2	1	0.0388336	HNSC
GO:0050764	BP	regulation of phagocytosis	99	4	0.0389585	HNSC
GO:0036155	BP	acylglycerol acyl-chain remodeling	4	1	0.0391055	HNSC
GO:1902962	BP	regulation of metalloendopeptidase activity involved in amyloid precursor protein catabolic process	2	1	0.0391682	HNSC
GO:1902963	BP	negative regulation of metalloendopeptidase activity involved in amyloid precursor protein catabolic process	2	1	0.0391682	HNSC
GO:0016713	MF	oxidoreductase activity, acting on paired donors, with incorporation or reduction of molecular oxygen, reduced iron-sulfur protein as one donor, and incorporation of one atom of oxygen	7	1	0.0392324	HNSC
GO:0070290	MF	N-acylphosphatidylethanolamine-specific phospholipase D activity	3	1	0.0396766	HNSC
GO:1990706	CC	MAD1 complex	1	1	0.0397674	HNSC
GO:0072183	BP	negative regulation of nephron tubule epithelial cell differentiation	2	1	0.039883	HNSC
GO:1990227	BP	paranodal junction maintenance	2	1	0.0400353	HNSC
GO:0033592	MF	RNA strand annealing activity	5	1	0.0401572	HNSC
GO:0010464	BP	regulation of mesenchymal cell proliferation	30	3	0.0404985	HNSC
GO:0001880	BP	Mullerian duct regression	4	1	0.0406664	HNSC
GO:0031315	CC	extrinsic component of mitochondrial outer membrane	4	1	0.0408398	HNSC
GO:0015420	MF	ABC-type vitamin B12 transporter activity	2	1	0.040952	HNSC
GO:0051264	MF	mono-olein transacylation activity	3	1	0.0410513	HNSC
GO:0051265	MF	diolein transacylation activity	3	1	0.0410513	HNSC
GO:0014003	BP	oligodendrocyte development	43	3	0.0411248	HNSC
GO:0099041	BP	vesicle tethering to Golgi	5	1	0.0411507	HNSC
GO:1900182	BP	positive regulation of protein localization to nucleus	87	4	0.0416754	HNSC
GO:0101003	CC	ficolin-1-rich granule membrane	60	3	0.0416891	HNSC
GO:0032869	BP	cellular response to insulin stimulus	203	7	0.0417782	HNSC
GO:1902044	BP	regulation of Fas signaling pathway	3	1	0.0420237	HNSC
GO:0032433	CC	filopodium tip	19	2	0.0421056	HNSC
GO:0043087	BP	regulation of GTPase activity	350	11	0.0425712	HNSC
GO:1990418	BP	response to insulin-like growth factor stimulus	3	1	0.04262	HNSC
GO:0071901	BP	negative regulation of protein serine/threonine kinase activity	119	5	0.0426577	HNSC
GO:0010825	BP	positive regulation of centrosome duplication	4	1	0.0431966	HNSC
GO:0097029	BP	mature conventional dendritic cell differentiation	4	1	0.0432329	HNSC
GO:0001844	BP	protein insertion into mitochondrial membrane involved in apoptotic signaling pathway	6	1	0.0433304	HNSC
GO:0042063	BP	gliogenesis	308	10	0.0436782	HNSC
GO:0061577	BP	calcium ion transmembrane transport via high voltage-gated calcium channel	19	2	0.0438459	HNSC
GO:0060644	BP	mammary gland epithelial cell differentiation	18	2	0.0439985	HNSC
GO:0005126	MF	cytokine receptor binding	242	6	0.0441203	HNSC
GO:1902685	BP	positive regulation of receptor localization to synapse	4	1	0.0443747	HNSC
GO:1990953	BP	intramanchette transport	2	1	0.0444882	HNSC
GO:0010507	BP	negative regulation of autophagy	84	4	0.0445232	HNSC
GO:0050435	BP	amyloid-beta metabolic process	63	3	0.0446695	HNSC
GO:0006362	BP	transcription elongation by RNA polymerase I	4	1	0.0448468	HNSC
GO:0035686	CC	sperm fibrous sheath	8	1	0.0448929	HNSC
GO:0060716	BP	labyrinthine layer blood vessel development	19	2	0.0449616	HNSC
GO:0005085	MF	guanyl-nucleotide exchange factor activity	219	8	0.0450237	HNSC
GO:1905224	BP	clathrin-coated pit assembly	2	1	0.0453634	HNSC
GO:0140576	BP	ascorbate homeostasis	3	1	0.0454726	HNSC
GO:0071955	BP	recycling endosome to Golgi transport	2	1	0.0456438	HNSC
GO:0031623	BP	receptor internalization	119	5	0.0456612	HNSC
GO:0045217	BP	cell-cell junction maintenance	17	2	0.0458122	HNSC
GO:0044334	BP	canonical Wnt signaling pathway involved in positive regulation of epithelial to mesenchymal transition	2	1	0.045816	HNSC
GO:0051000	BP	positive regulation of nitric-oxide synthase activity	20	2	0.0461262	HNSC
GO:0004140	MF	dephospho-CoA kinase activity	2	1	0.0468337	HNSC
GO:0002465	BP	peripheral tolerance induction	4	1	0.0469807	HNSC
GO:0005150	MF	interleukin-1, type I receptor binding	2	1	0.0469891	HNSC
GO:0036465	BP	synaptic vesicle recycling	78	4	0.0471524	HNSC
GO:0033233	BP	regulation of protein sumoylation	23	2	0.0473437	HNSC
GO:0002280	BP	monocyte activation involved in immune response	2	1	0.0473511	HNSC
GO:0002508	BP	central tolerance induction	2	1	0.0475633	HNSC
GO:1990728	CC	mitotic spindle assembly checkpoint MAD1-MAD2 complex	2	1	0.0475734	HNSC
GO:0031643	BP	positive regulation of myelination	18	2	0.0476355	HNSC
GO:0120160	MF	intraciliary transport particle A binding	3	1	0.0479188	HNSC
GO:0001692	BP	histamine metabolic process	6	1	0.0479317	HNSC
GO:0052803	BP	imidazole-containing compound metabolic process	6	1	0.0479317	HNSC
GO:0035331	BP	negative regulation of hippo signaling	13	2	0.0480236	HNSC
GO:0006469	BP	negative regulation of protein kinase activity	212	7	0.0486153	HNSC
GO:1903422	BP	negative regulation of synaptic vesicle recycling	2	1	0.048707	HNSC
GO:0015742	BP	alpha-ketoglutarate transport	5	1	0.0487509	HNSC
GO:0046811	MF	histone deacetylase inhibitor activity	2	1	0.0491189	HNSC
GO:0000079	BP	regulation of cyclin-dependent protein serine/threonine kinase activity	100	4	0.0492564	HNSC
GO:0016344	BP	meiotic chromosome movement towards spindle pole	3	1	0.0493731	HNSC
GO:0097154	BP	GABAergic neuron differentiation	16	2	0.0495251	HNSC
GO:0046825	BP	regulation of protein export from nucleus	31	2	0.0496788	HNSC
GO:0008360	BP	regulation of cell shape	154	6	0.0497054	HNSC
GO:0098835	CC	presynaptic endocytic zone membrane	6	1	0.0497132	HNSC
GO:0042351	BP	'de novo' GDP-L-fucose biosynthetic process	2	1	0.049804	HNSC
GO:0032915	BP	positive regulation of transforming growth factor beta2 production	3	1	0.049866	HNSC
