# Supplementary material for: Attenuated sex-related DNA methylation differences in cancer highlight the magnitude bias mediating existing disparities
Source: Biol Sex Differ. 2024 Dec 23;15:106. doi: 10.1186/s13293-024-00682-4 (PMC11664931; doi:10.1186/s13293-024-00682-4)
Supplement: Supplementary file 15 — Supplementary material 15. [file 13293_2024_682_MOESM15_ESM.xlsx]

## Sheet: LIHC
ID	ONTOLOGY	TERM	N	DE	P.DE	Cancer
GO:0055017	BP	cardiac muscle tissue growth	91	8	0.000200725	LIHC
GO:0098883	BP	synapse pruning	11	3	0.000437923	LIHC
GO:0060419	BP	heart growth	100	8	0.000478095	LIHC
GO:0150064	BP	vertebrate eye-specific patterning	3	2	0.000709186	LIHC
GO:0060038	BP	cardiac muscle cell proliferation	60	6	0.00100249	LIHC
GO:0150062	BP	complement-mediated synapse pruning	4	2	0.00104042	LIHC
GO:0004832	MF	valine-tRNA ligase activity	2	2	0.00133843	LIHC
GO:0006438	BP	valyl-tRNA aminoacylation	2	2	0.00133843	LIHC
GO:0035265	BP	organ growth	177	10	0.00137493	LIHC
GO:0002697	BP	regulation of immune effector process	361	12	0.00176022	LIHC
GO:0004767	MF	sphingomyelin phosphodiesterase activity	6	2	0.00225901	LIHC
GO:0035425	BP	autocrine signaling	6	2	0.0026781	LIHC
GO:0030280	MF	structural constituent of skin epidermis	36	3	0.00273197	LIHC
GO:1990909	CC	Wnt signalosome	13	3	0.00273841	LIHC
GO:0070314	BP	G1 to G0 transition	20	3	0.00282506	LIHC
GO:0014855	BP	striated muscle cell proliferation	78	6	0.00339572	LIHC
GO:0006685	BP	sphingomyelin catabolic process	7	2	0.0034222	LIHC
GO:0001517	MF	N-acetylglucosamine 6-O-sulfotransferase activity	7	2	0.00346344	LIHC
GO:0050786	MF	RAGE receptor binding	9	2	0.00356207	LIHC
GO:0002699	BP	positive regulation of immune effector process	247	9	0.00356908	LIHC
GO:1902003	BP	regulation of amyloid-beta formation	46	4	0.0040536	LIHC
GO:0044339	BP	canonical Wnt signaling pathway involved in osteoblast differentiation	7	2	0.00442171	LIHC
GO:0021782	BP	glial cell development	117	7	0.00473045	LIHC
GO:0004367	MF	glycerol-3-phosphate dehydrogenase [NAD+] activity	1	1	0.00486993	LIHC
GO:0047952	MF	glycerol-3-phosphate dehydrogenase [NAD(P)+] activity	1	1	0.00486993	LIHC
GO:0002705	BP	positive regulation of leukocyte mediated immunity	130	6	0.00521728	LIHC
GO:0000271	BP	polysaccharide biosynthetic process	71	5	0.00537392	LIHC
GO:0034205	BP	amyloid-beta formation	54	4	0.00537503	LIHC
GO:0004362	MF	glutathione-disulfide reductase (NADPH) activity	1	1	0.00544537	LIHC
GO:0019900	MF	kinase binding	750	22	0.00558179	LIHC
GO:1904195	BP	regulation of granulosa cell proliferation	1	1	0.00576788	LIHC
GO:1904197	BP	positive regulation of granulosa cell proliferation	1	1	0.00576788	LIHC
GO:1990739	BP	granulosa cell proliferation	1	1	0.00576788	LIHC
GO:0150146	BP	cell junction disassembly	23	3	0.00585307	LIHC
GO:0045109	BP	intermediate filament organization	68	4	0.00585596	LIHC
GO:0046777	BP	protein autophosphorylation	225	10	0.00617801	LIHC
GO:0019901	MF	protein kinase binding	669	20	0.00622275	LIHC
GO:0018024	MF	histone-lysine N-methyltransferase activity	42	4	0.0062665	LIHC
GO:1902430	BP	negative regulation of amyloid-beta formation	27	3	0.00641433	LIHC
GO:0048539	BP	bone marrow development	9	2	0.006519	LIHC
GO:0160028	BP	negative regulation of pyroptosis	1	1	0.00679777	LIHC
GO:0035325	MF	Toll-like receptor binding	12	2	0.00687581	LIHC
GO:1990314	BP	cellular response to insulin-like growth factor stimulus	8	2	0.00689712	LIHC
GO:0002703	BP	regulation of leukocyte mediated immunity	227	8	0.0071174	LIHC
GO:1902991	BP	regulation of amyloid precursor protein catabolic process	53	4	0.0072455	LIHC
GO:1902992	BP	negative regulation of amyloid precursor protein catabolic process	31	3	0.00749876	LIHC
GO:0048523	BP	negative regulation of cellular process	4726	88	0.00770701	LIHC
GO:0030215	MF	semaphorin receptor binding	23	3	0.00788172	LIHC
GO:0042826	MF	histone deacetylase binding	120	6	0.00824493	LIHC
GO:0030509	BP	BMP signaling pathway	163	8	0.00903365	LIHC
GO:1904779	BP	regulation of protein localization to centrosome	10	2	0.00932394	LIHC
GO:0140795	MF	histone-arginine deiminase activity (H3-R2 specific)	1	1	0.0094714	LIHC
GO:0140796	MF	histone-arginine deiminase activity (H3-R8 specific)	1	1	0.0094714	LIHC
GO:0140797	MF	histone-arginine deiminase activity (H3-R17 specific)	1	1	0.0094714	LIHC
GO:0051891	BP	positive regulation of cardioblast differentiation	6	2	0.00951978	LIHC
GO:0050435	BP	amyloid-beta metabolic process	63	4	0.0095545	LIHC
GO:0048738	BP	cardiac muscle tissue development	238	10	0.00957409	LIHC
GO:0014068	BP	positive regulation of phosphatidylinositol 3-kinase signaling	78	5	0.00970718	LIHC
GO:0008276	MF	protein methyltransferase activity	89	5	0.0100208	LIHC
GO:0002824	BP	positive regulation of adaptive immune response based on somatic recombination of immune receptors built from immunoglobulin superfamily domains	107	5	0.0102918	LIHC
GO:0001910	BP	regulation of leukocyte mediated cytotoxicity	80	4	0.0103758	LIHC
GO:1902042	BP	negative regulation of extrinsic apoptotic signaling pathway via death domain receptors	31	3	0.0103774	LIHC
GO:0070972	BP	protein localization to endoplasmic reticulum	67	4	0.0103882	LIHC
GO:0002708	BP	positive regulation of lymphocyte mediated immunity	109	5	0.0111035	LIHC
GO:0016279	MF	protein-lysine N-methyltransferase activity	56	4	0.0112772	LIHC
GO:0045787	BP	positive regulation of cell cycle	336	11	0.0112848	LIHC
GO:0042731	MF	PH domain binding	7	2	0.0113553	LIHC
GO:1904780	BP	negative regulation of protein localization to centrosome	2	1	0.0114569	LIHC
GO:0016278	MF	lysine N-methyltransferase activity	57	4	0.0115092	LIHC
GO:0097059	CC	CNTFR-CLCF1 complex	2	1	0.0117098	LIHC
GO:1905184	BP	positive regulation of protein serine/threonine phosphatase activity	2	1	0.011725	LIHC
GO:2000471	BP	regulation of hematopoietic stem cell migration	2	1	0.0119377	LIHC
GO:2000473	BP	positive regulation of hematopoietic stem cell migration	2	1	0.0119377	LIHC
GO:0034163	BP	regulation of toll-like receptor 9 signaling pathway	10	2	0.0120175	LIHC
GO:1900729	BP	regulation of adenylate cyclase-inhibiting opioid receptor signaling pathway	1	1	0.0121351	LIHC
GO:1900731	BP	positive regulation of adenylate cyclase-inhibiting opioid receptor signaling pathway	1	1	0.0121351	LIHC
GO:2000476	BP	positive regulation of opioid receptor signaling pathway	1	1	0.0121351	LIHC
GO:0060175	MF	brain-derived neurotrophic factor receptor activity	1	1	0.0122572	LIHC
GO:0099551	BP	trans-synaptic signaling by neuropeptide, modulating synaptic transmission	1	1	0.0122572	LIHC
GO:0042987	BP	amyloid precursor protein catabolic process	66	4	0.0124881	LIHC
GO:0002161	MF	aminoacyl-tRNA editing activity	13	2	0.0125958	LIHC
GO:0106074	BP	aminoacyl-tRNA metabolism involved in translational fidelity	13	2	0.0125958	LIHC
GO:0044333	BP	Wnt signaling pathway involved in digestive tract morphogenesis	1	1	0.0126642	LIHC
GO:2000056	BP	regulation of Wnt signaling pathway involved in digestive tract morphogenesis	1	1	0.0126642	LIHC
GO:2000057	BP	negative regulation of Wnt signaling pathway involved in digestive tract morphogenesis	1	1	0.0126642	LIHC
GO:1990730	CC	VCP-NSFL1C complex	2	1	0.0127483	LIHC
GO:0032906	BP	transforming growth factor beta2 production	9	2	0.0131105	LIHC
GO:0032909	BP	regulation of transforming growth factor beta2 production	9	2	0.0131105	LIHC
GO:0048519	BP	negative regulation of biological process	5552	96	0.0131723	LIHC
GO:0016031	BP	tRNA import into mitochondrion	2	1	0.0131968	LIHC
GO:0071772	BP	response to BMP	174	8	0.0134347	LIHC
GO:0071773	BP	cellular response to BMP stimulus	174	8	0.0134347	LIHC
GO:0002821	BP	positive regulation of adaptive immune response	113	5	0.0134979	LIHC
GO:0060032	BP	notochord regression	1	1	0.0138336	LIHC
GO:0014706	BP	striated muscle tissue development	254	10	0.0139463	LIHC
GO:0002714	BP	positive regulation of B cell mediated immunity	38	3	0.0139493	LIHC
GO:0002891	BP	positive regulation of immunoglobulin mediated immune response	38	3	0.0139493	LIHC
GO:0002920	BP	regulation of humoral immune response	44	3	0.014081	LIHC
GO:0003149	BP	membranous septum morphogenesis	8	2	0.0141233	LIHC
GO:0046622	BP	positive regulation of organ growth	51	4	0.0141504	LIHC
GO:0030888	BP	regulation of B cell proliferation	65	4	0.0143368	LIHC
GO:0033002	BP	muscle cell proliferation	239	9	0.0144462	LIHC
GO:0051775	BP	response to redox state	13	2	0.0144963	LIHC
GO:0017147	MF	Wnt-protein binding	29	3	0.0145327	LIHC
GO:0140794	MF	histone-arginine deiminase activity	2	1	0.0146183	LIHC
GO:0140798	MF	histone-arginine deiminase activity (H3-R26 specific)	2	1	0.0146183	LIHC
GO:2000736	BP	regulation of stem cell differentiation	81	5	0.0146393	LIHC
GO:1903561	CC	extracellular vesicle	2134	40	0.0146459	LIHC
GO:0043230	CC	extracellular organelle	2135	40	0.0147383	LIHC
GO:0065010	CC	extracellular membrane-bounded organelle	2135	40	0.0147383	LIHC
GO:0046974	MF	histone methyltransferase activity (H3-K9 specific)	10	2	0.0149321	LIHC
GO:0001846	MF	opsonin binding	18	2	0.0153695	LIHC
GO:0030510	BP	regulation of BMP signaling pathway	109	6	0.015598	LIHC
GO:0006044	BP	N-acetylglucosamine metabolic process	18	2	0.0156907	LIHC
GO:1902104	BP	positive regulation of metaphase/anaphase transition of meiotic cell cycle	1	1	0.0157693	LIHC
GO:1905134	BP	positive regulation of meiotic chromosome separation	1	1	0.0157693	LIHC
GO:1905186	BP	regulation of metaphase/anaphase transition of meiosis I	1	1	0.0157693	LIHC
GO:1905188	BP	positive regulation of metaphase/anaphase transition of meiosis I	1	1	0.0157693	LIHC
GO:1990949	BP	metaphase/anaphase transition of meiosis I	1	1	0.0157693	LIHC
GO:0016363	CC	nuclear matrix	126	6	0.0158469	LIHC
GO:0003844	MF	1,4-alpha-glucan branching enzyme activity	1	1	0.0159565	LIHC
GO:0102752	MF	1,4-alpha-glucan branching enzyme activity (using a glucosylated glycogenin as primer for glycogen synthesis)	1	1	0.0159565	LIHC
GO:0150101	BP	regulation of microtubule anchoring at centrosome	1	1	0.0160671	LIHC
GO:0045628	BP	regulation of T-helper 2 cell differentiation	11	2	0.0160816	LIHC
GO:0033692	BP	cellular polysaccharide biosynthetic process	64	4	0.0163203	LIHC
GO:0014823	BP	response to activity	69	4	0.0165994	LIHC
GO:0046168	BP	glycerol-3-phosphate catabolic process	2	1	0.0166654	LIHC
GO:0019215	MF	intermediate filament binding	13	2	0.0168469	LIHC
GO:1902480	BP	protein localization to mitotic spindle	1	1	0.0168622	LIHC
GO:0042054	MF	histone methyltransferase activity	58	4	0.0168747	LIHC
GO:0022011	BP	myelination in peripheral nervous system	29	3	0.0168874	LIHC
GO:0032292	BP	peripheral nervous system axon ensheathment	29	3	0.0168874	LIHC
GO:0001702	BP	gastrulation with mouth forming second	28	3	0.0171379	LIHC
GO:0110090	BP	positive regulation of hippocampal neuron apoptotic process	2	1	0.0172573	LIHC
GO:0009719	BP	response to endogenous stimulus	1587	36	0.0176319	LIHC
GO:0031341	BP	regulation of cell killing	95	4	0.0176486	LIHC
GO:0035578	CC	azurophil granule lumen	83	4	0.0178637	LIHC
GO:0065002	BP	intracellular protein transmembrane transport	51	3	0.0179421	LIHC
GO:0001533	CC	cornified envelope	55	3	0.0181368	LIHC
GO:0046604	BP	positive regulation of mitotic centrosome separation	3	1	0.0182154	LIHC
GO:0007088	BP	regulation of mitotic nuclear division	117	5	0.0186698	LIHC
GO:0097120	BP	receptor localization to synapse	56	4	0.0187284	LIHC
GO:0048589	BP	developmental growth	637	19	0.0189596	LIHC
GO:0099540	BP	trans-synaptic signaling by neuropeptide	2	1	0.0189783	LIHC
GO:0060045	BP	positive regulation of cardiac muscle cell proliferation	29	3	0.0191624	LIHC
GO:0004065	MF	arylsulfatase activity	13	2	0.0192753	LIHC
GO:0014044	BP	Schwann cell development	32	3	0.0193454	LIHC
GO:0051890	BP	regulation of cardioblast differentiation	8	2	0.0194756	LIHC
GO:0004133	MF	glycogen debranching enzyme activity	1	1	0.0196307	LIHC
GO:0004134	MF	4-alpha-glucanotransferase activity	1	1	0.0196307	LIHC
GO:0004135	MF	amylo-alpha-1,6-glucosidase activity	1	1	0.0196307	LIHC
GO:0043033	CC	isoamylase complex	1	1	0.0196307	LIHC
GO:0102500	MF	beta-maltose 4-alpha-glucanotransferase activity	1	1	0.0196307	LIHC
GO:0002922	BP	positive regulation of humoral immune response	22	2	0.0200935	LIHC
GO:0004616	MF	phosphogluconate dehydrogenase (decarboxylating) activity	1	1	0.0202167	LIHC
GO:2000740	BP	negative regulation of mesenchymal stem cell differentiation	2	1	0.0208477	LIHC
GO:1990678	BP	histone H4-K16 deacetylation	1	1	0.0210159	LIHC
GO:0070488	BP	neutrophil aggregation	2	1	0.0211774	LIHC
GO:0001912	BP	positive regulation of leukocyte mediated cytotoxicity	53	3	0.02141	LIHC
GO:0006450	BP	regulation of translational fidelity	20	2	0.021454	LIHC
GO:2001287	BP	negative regulation of caveolin-mediated endocytosis	2	1	0.0214778	LIHC
GO:0003148	BP	outflow tract septum morphogenesis	25	3	0.0215519	LIHC
GO:0031262	CC	Ndc80 complex	4	1	0.0218677	LIHC
GO:0006933	BP	negative regulation of cell adhesion involved in substrate-bound cell migration	4	1	0.0218771	LIHC
GO:0042063	BP	gliogenesis	307	11	0.021897	LIHC
GO:0033688	BP	regulation of osteoblast proliferation	31	3	0.0219519	LIHC
GO:0048144	BP	fibroblast proliferation	101	5	0.022283	LIHC
GO:0031424	BP	keratinization	74	3	0.0223399	LIHC
GO:0099072	BP	regulation of postsynaptic membrane neurotransmitter receptor levels	63	4	0.0224319	LIHC
GO:0042813	MF	Wnt receptor activity	15	2	0.0226127	LIHC
GO:0071062	CC	alphav-beta3 integrin-vitronectin complex	3	1	0.0227859	LIHC
GO:0010001	BP	glial cell differentiation	227	9	0.0229342	LIHC
GO:0002252	BP	immune effector process	584	14	0.0230847	LIHC
GO:0034637	BP	cellular carbohydrate biosynthetic process	76	4	0.023102	LIHC
GO:0033690	BP	positive regulation of osteoblast proliferation	13	2	0.0231448	LIHC
GO:0072497	BP	mesenchymal stem cell differentiation	12	2	0.0233758	LIHC
GO:0005976	BP	polysaccharide metabolic process	107	5	0.023468	LIHC
GO:0045104	BP	intermediate filament cytoskeleton organization	88	4	0.0236341	LIHC
GO:1901071	BP	glucosamine-containing compound metabolic process	25	2	0.0237042	LIHC
GO:0055023	BP	positive regulation of cardiac muscle tissue growth	36	3	0.0237275	LIHC
GO:0048295	BP	positive regulation of isotype switching to IgE isotypes	4	1	0.0237663	LIHC
GO:0034236	MF	protein kinase A catalytic subunit binding	13	2	0.0238195	LIHC
GO:1905578	BP	regulation of ERBB3 signaling pathway	1	1	0.0238968	LIHC
GO:1905580	BP	positive regulation of ERBB3 signaling pathway	1	1	0.0238968	LIHC
GO:0045103	BP	intermediate filament-based process	89	4	0.023979	LIHC
GO:0002822	BP	regulation of adaptive immune response based on somatic recombination of immune receptors built from immunoglobulin superfamily domains	173	6	0.0241168	LIHC
GO:0055021	BP	regulation of cardiac muscle tissue growth	67	4	0.0245492	LIHC
GO:0015919	BP	peroxisomal membrane transport	20	2	0.0246601	LIHC
GO:0071417	BP	cellular response to organonitrogen compound	629	17	0.0249719	LIHC
GO:1903701	BP	substantia propria of cornea development	1	1	0.0254232	LIHC
GO:0070062	CC	extracellular exosome	2065	38	0.0255637	LIHC
GO:0002700	BP	regulation of production of molecular mediator of immune response	180	6	0.0255641	LIHC
GO:0010921	BP	regulation of phosphatase activity	81	4	0.025594	LIHC
GO:0090092	BP	regulation of transmembrane receptor protein serine/threonine kinase signaling pathway	283	10	0.0261208	LIHC
GO:0038023	MF	signaling receptor activity	1304	25	0.0262041	LIHC
GO:0060089	MF	molecular transducer activity	1304	25	0.0262041	LIHC
GO:1902476	BP	chloride transmembrane transport	100	5	0.0262176	LIHC
GO:0002888	BP	positive regulation of myeloid leukocyte mediated immunity	19	2	0.0262715	LIHC
GO:0034162	BP	toll-like receptor 9 signaling pathway	18	2	0.0262887	LIHC
GO:0048741	BP	skeletal muscle fiber development	38	3	0.0263657	LIHC
GO:0051726	BP	regulation of cell cycle	1102	23	0.026552	LIHC
GO:0019520	BP	aldonic acid metabolic process	2	1	0.0268595	LIHC
GO:0019521	BP	D-gluconate metabolic process	2	1	0.0268595	LIHC
GO:0046176	BP	aldonic acid catabolic process	2	1	0.0268595	LIHC
GO:0046177	BP	D-gluconate catabolic process	2	1	0.0268595	LIHC
GO:0031343	BP	positive regulation of cell killing	60	3	0.0270508	LIHC
GO:0031092	CC	platelet alpha granule membrane	17	2	0.027255	LIHC
GO:0050778	BP	positive regulation of immune response	505	12	0.0272581	LIHC
GO:0001848	MF	complement binding	22	2	0.0275077	LIHC
GO:0070307	BP	lens fiber cell development	14	2	0.0275456	LIHC
GO:0001906	BP	cell killing	166	5	0.0277168	LIHC
GO:0002440	BP	production of molecular mediator of immune response	228	7	0.0277457	LIHC
GO:0043163	BP	cell envelope organization	3	1	0.0277677	LIHC
GO:0090068	BP	positive regulation of cell cycle process	252	8	0.0277778	LIHC
GO:0044378	MF	non-sequence-specific DNA binding, bending	2	1	0.0278027	LIHC
GO:0046620	BP	regulation of organ growth	101	5	0.0278749	LIHC
GO:0043574	BP	peroxisomal transport	22	2	0.0279099	LIHC
GO:0004888	MF	transmembrane signaling receptor activity	1091	21	0.0280479	LIHC
GO:0034399	CC	nuclear periphery	145	6	0.0284929	LIHC
GO:0019322	BP	pentose biosynthetic process	2	1	0.0286816	LIHC
GO:0033687	BP	osteoblast proliferation	36	3	0.028747	LIHC
GO:0008284	BP	positive regulation of cell population proliferation	946	22	0.0287781	LIHC
GO:0031714	MF	C5a anaphylatoxin chemotactic receptor binding	1	1	0.0289773	LIHC
GO:0031715	MF	C5L2 anaphylatoxin chemotactic receptor binding	1	1	0.0289773	LIHC
GO:1904646	BP	cellular response to amyloid-beta	43	3	0.0291488	LIHC
GO:0008484	MF	sulfuric ester hydrolase activity	16	2	0.0293788	LIHC
GO:0030890	BP	positive regulation of B cell proliferation	44	3	0.02959	LIHC
GO:0015910	BP	long-chain fatty acid import into peroxisome	4	1	0.0296707	LIHC
GO:0071495	BP	cellular response to endogenous stimulus	1341	31	0.0297277	LIHC
GO:2000077	BP	negative regulation of type B pancreatic cell development	2	1	0.0297306	LIHC
GO:0016051	BP	carbohydrate biosynthetic process	209	7	0.0298331	LIHC
GO:0072060	BP	outer medullary collecting duct development	1	1	0.0300387	LIHC
GO:0044770	BP	cell cycle phase transition	568	14	0.0301983	LIHC
GO:0062044	BP	negative regulation of cardiac epithelial to mesenchymal transition	2	1	0.0303104	LIHC
GO:1905006	BP	negative regulation of epithelial to mesenchymal transition involved in endocardial cushion formation	2	1	0.0303104	LIHC
GO:1904003	BP	negative regulation of sebum secreting cell proliferation	1	1	0.0303624	LIHC
GO:1905240	BP	negative regulation of canonical Wnt signaling pathway involved in osteoblast differentiation	2	1	0.0303859	LIHC
GO:0071806	BP	protein transmembrane transport	62	3	0.0304063	LIHC
GO:0045624	BP	positive regulation of T-helper cell differentiation	23	2	0.030431	LIHC
GO:0034683	CC	integrin alphav-beta3 complex	3	1	0.0306523	LIHC
GO:0097161	MF	DH domain binding	1	1	0.0308128	LIHC
GO:0005978	BP	glycogen biosynthetic process	43	3	0.0308496	LIHC
GO:0009250	BP	glucan biosynthetic process	43	3	0.0308496	LIHC
GO:0004368	MF	glycerol-3-phosphate dehydrogenase (quinone) activity	2	1	0.0308665	LIHC
GO:0006127	BP	glycerophosphate shuttle	2	1	0.0308665	LIHC
GO:0016901	MF	oxidoreductase activity, acting on the CH-OH group of donors, quinone or similar compound as acceptor	2	1	0.0308665	LIHC
GO:0045064	BP	T-helper 2 cell differentiation	15	2	0.0308893	LIHC
GO:0009913	BP	epidermal cell differentiation	221	7	0.0309652	LIHC
GO:0005161	MF	platelet-derived growth factor receptor binding	14	2	0.0312229	LIHC
GO:0042100	BP	B cell proliferation	88	4	0.0312465	LIHC
GO:0044855	BP	plasma membrane raft distribution	2	1	0.0312797	LIHC
GO:0044856	BP	plasma membrane raft localization	2	1	0.0312797	LIHC
GO:0040007	BP	growth	899	23	0.0313155	LIHC
GO:0003400	BP	regulation of COPII vesicle coating	4	1	0.0315896	LIHC
GO:0090113	BP	regulation of ER to Golgi vesicle-mediated transport by GTP hydrolysis	4	1	0.0315896	LIHC
GO:0035927	BP	RNA import into mitochondrion	5	1	0.0318746	LIHC
GO:0007178	BP	transmembrane receptor protein serine/threonine kinase signaling pathway	379	12	0.0319481	LIHC
GO:0014037	BP	Schwann cell differentiation	38	3	0.032272	LIHC
GO:0015108	MF	chloride transmembrane transporter activity	106	5	0.0323238	LIHC
GO:0002711	BP	positive regulation of T cell mediated immunity	57	3	0.032422	LIHC
GO:0019045	BP	latent virus replication	1	1	0.032501	LIHC
GO:0019046	BP	release from viral latency	1	1	0.032501	LIHC
GO:0005254	MF	chloride channel activity	77	4	0.0328126	LIHC
GO:0015774	BP	polysaccharide transport	1	1	0.0329492	LIHC
GO:0061751	MF	neutral sphingomyelin phosphodiesterase activity	1	1	0.0329492	LIHC
GO:0035868	CC	alphav-beta3 integrin-HMGB1 complex	3	1	0.0330018	LIHC
GO:0008459	MF	chondroitin 6-sulfotransferase activity	2	1	0.0332214	LIHC
GO:0060033	BP	anatomical structure regression	16	2	0.0333706	LIHC
GO:0097058	CC	CRLF-CLCF1 complex	2	1	0.0334028	LIHC
GO:0014066	BP	regulation of phosphatidylinositol 3-kinase signaling	106	5	0.0335539	LIHC
GO:0033630	BP	positive regulation of cell adhesion mediated by integrin	22	2	0.0339863	LIHC
GO:2000754	BP	regulation of sphingomyelin catabolic process	2	1	0.0341249	LIHC
GO:2000755	BP	positive regulation of sphingomyelin catabolic process	2	1	0.0341249	LIHC
GO:1905552	BP	positive regulation of protein localization to endoplasmic reticulum	2	1	0.034188	LIHC
GO:0004784	MF	superoxide dismutase activity	4	1	0.0342053	LIHC
GO:0016721	MF	oxidoreductase activity, acting on superoxide radicals as acceptor	4	1	0.0342053	LIHC
GO:0032570	BP	response to progesterone	37	3	0.0342575	LIHC
GO:0030943	MF	mitochondrion targeting sequence binding	5	1	0.0343568	LIHC
GO:0006684	BP	sphingomyelin metabolic process	19	2	0.0345134	LIHC
GO:0043890	MF	N-acetylgalactosamine-6-sulfatase activity	1	1	0.0346041	LIHC
GO:0072053	BP	renal inner medulla development	2	1	0.0346372	LIHC
GO:0072054	BP	renal outer medulla development	2	1	0.0346372	LIHC
GO:0034739	MF	histone deacetylase activity (H4-K16 specific)	4	1	0.0349508	LIHC
GO:0099183	BP	trans-synaptic signaling by BDNF, modulating synaptic transmission	3	1	0.0350218	LIHC
GO:0031151	MF	histone methyltransferase activity (H3-K79 specific)	1	1	0.0351499	LIHC
GO:0070828	BP	heterochromatin organization	90	4	0.0352623	LIHC
GO:0000339	MF	RNA cap binding	18	2	0.0352707	LIHC
GO:1905099	BP	positive regulation of guanyl-nucleotide exchange factor activity	2	1	0.03541	LIHC
GO:2001108	BP	positive regulation of Rho guanyl-nucleotide exchange factor activity	2	1	0.03541	LIHC
GO:0001970	BP	positive regulation of activation of membrane attack complex	2	1	0.0355528	LIHC
GO:0002819	BP	regulation of adaptive immune response	188	6	0.0355562	LIHC
GO:0014904	BP	myotube cell development	42	3	0.0356468	LIHC
GO:0016332	BP	establishment or maintenance of polarity of embryonic epithelium	2	1	0.0357083	LIHC
GO:0002886	BP	regulation of myeloid leukocyte mediated immunity	58	3	0.035932	LIHC
GO:0060415	BP	muscle tissue morphogenesis	73	4	0.0359387	LIHC
GO:0000122	BP	negative regulation of transcription by RNA polymerase II	926	23	0.0361669	LIHC
GO:1902683	BP	regulation of receptor localization to synapse	18	2	0.0362518	LIHC
GO:0035584	BP	calcium-mediated signaling using intracellular calcium source	22	2	0.0362587	LIHC
GO:0060072	MF	large conductance calcium-activated potassium channel activity	1	1	0.0369682	LIHC
GO:0032516	BP	positive regulation of phosphoprotein phosphatase activity	21	2	0.0370433	LIHC
GO:2000257	BP	regulation of protein activation cascade	2	1	0.0371357	LIHC
GO:0060421	BP	positive regulation of heart growth	40	3	0.0371742	LIHC
GO:0045797	BP	positive regulation of intestinal cholesterol absorption	3	1	0.0372828	LIHC
GO:2000689	BP	actomyosin contractile ring assembly actin filament organization	1	1	0.0375772	LIHC
GO:0045111	CC	intermediate filament cytoskeleton	213	6	0.0377535	LIHC
GO:1990706	CC	MAD1 complex	1	1	0.0378606	LIHC
GO:1904151	BP	positive regulation of microglial cell mediated cytotoxicity	4	1	0.0380464	LIHC
GO:0042982	BP	amyloid precursor protein metabolic process	92	4	0.0381684	LIHC
GO:0031324	BP	negative regulation of cellular metabolic process	2238	44	0.0382728	LIHC
GO:1902041	BP	regulation of extrinsic apoptotic signaling pathway via death domain receptors	50	3	0.0387247	LIHC
GO:0014850	BP	response to muscle activity	23	2	0.0388409	LIHC
GO:1905550	BP	regulation of protein localization to endoplasmic reticulum	3	1	0.0389192	LIHC
GO:0045814	BP	negative regulation of gene expression, epigenetic	92	4	0.0389911	LIHC
GO:1903615	BP	positive regulation of protein tyrosine phosphatase activity	3	1	0.0390835	LIHC
GO:0099642	BP	retrograde axonal protein transport	2	1	0.039165	LIHC
GO:0008170	MF	N-methyltransferase activity	95	4	0.0391925	LIHC
GO:0071461	BP	cellular response to redox state	2	1	0.0392539	LIHC
GO:0019002	MF	GMP binding	2	1	0.0392713	LIHC
GO:0003275	BP	apoptotic process involved in outflow tract morphogenesis	3	1	0.0393305	LIHC
GO:1902256	BP	regulation of apoptotic process involved in outflow tract morphogenesis	3	1	0.0393305	LIHC
GO:1904862	BP	inhibitory synapse assembly	18	2	0.0393519	LIHC
GO:0060420	BP	regulation of heart growth	74	4	0.0394211	LIHC
GO:0031635	BP	adenylate cyclase-inhibiting opioid receptor signaling pathway	3	1	0.0394384	LIHC
GO:0030882	MF	lipid antigen binding	5	1	0.0394895	LIHC
GO:0030883	MF	endogenous lipid antigen binding	5	1	0.0394895	LIHC
GO:0030884	MF	exogenous lipid antigen binding	5	1	0.0394895	LIHC
GO:0048006	BP	antigen processing and presentation, endogenous lipid antigen via MHC class Ib	5	1	0.0394895	LIHC
GO:0034774	CC	secretory granule lumen	311	8	0.0395939	LIHC
GO:1902533	BP	positive regulation of intracellular signal transduction	989	22	0.039666	LIHC
GO:0008757	MF	S-adenosylmethionine-dependent methyltransferase activity	154	5	0.0397137	LIHC
GO:0042704	BP	uterine wall breakdown	2	1	0.039732	LIHC
GO:0060697	BP	positive regulation of phospholipid catabolic process	3	1	0.0397511	LIHC
GO:0006821	BP	chloride transport	117	5	0.0398158	LIHC
GO:0097156	BP	fasciculation of motor neuron axon	2	1	0.0398918	LIHC
GO:0043217	BP	myelin maintenance	18	2	0.0399346	LIHC
GO:1905451	BP	positive regulation of Fc-gamma receptor signaling pathway involved in phagocytosis	3	1	0.0399413	LIHC
GO:0009409	BP	response to cold	51	3	0.0401804	LIHC
GO:0008168	MF	methyltransferase activity	198	6	0.0403465	LIHC
GO:0004668	MF	protein-arginine deiminase activity	5	1	0.0406059	LIHC
GO:0006954	BP	inflammatory response	810	16	0.0409039	LIHC
GO:0002443	BP	leukocyte mediated immunity	365	9	0.0409042	LIHC
GO:0060205	CC	cytoplasmic vesicle lumen	314	8	0.0409103	LIHC
GO:0051783	BP	regulation of nuclear division	143	5	0.0412502	LIHC
GO:0002460	BP	adaptive immune response based on somatic recombination of immune receptors built from immunoglobulin superfamily domains	284	8	0.0413447	LIHC
GO:1900220	BP	semaphorin-plexin signaling pathway involved in bone trabecula morphogenesis	2	1	0.0413577	LIHC
GO:1904426	BP	positive regulation of GTP binding	3	1	0.0418324	LIHC
GO:0106363	MF	protein-cysteine methyltransferase activity	2	1	0.0418381	LIHC
GO:0050748	BP	negative regulation of lipoprotein metabolic process	5	1	0.041843	LIHC
GO:1904480	BP	positive regulation of intestinal absorption	4	1	0.0418443	LIHC
GO:1904731	BP	positive regulation of intestinal lipid absorption	4	1	0.0418443	LIHC
GO:0048863	BP	stem cell differentiation	246	9	0.0418655	LIHC
GO:0045296	MF	cadherin binding	330	10	0.0420038	LIHC
GO:0001909	BP	leukocyte mediated cytotoxicity	121	4	0.0420234	LIHC
GO:0055107	BP	Golgi to secretory granule transport	2	1	0.0420644	LIHC
GO:0009331	CC	glycerol-3-phosphate dehydrogenase complex	3	1	0.042355	LIHC
GO:1990728	CC	mitotic spindle assembly checkpoint MAD1-MAD2 complex	2	1	0.0424648	LIHC
GO:0045830	BP	positive regulation of isotype switching	26	2	0.0425132	LIHC
GO:0072698	BP	protein localization to microtubule cytoskeleton	54	3	0.0426262	LIHC
GO:1904886	BP	beta-catenin destruction complex disassembly	3	1	0.0426389	LIHC
GO:0071914	CC	prominosome	2	1	0.0428626	LIHC
GO:0071133	CC	alpha9-beta1 integrin-ADAM8 complex	2	1	0.0428885	LIHC
GO:0072752	BP	cellular response to rapamycin	2	1	0.0431091	LIHC
GO:0005882	CC	intermediate filament	175	5	0.0432594	LIHC
GO:0043302	BP	positive regulation of leukocyte degranulation	23	2	0.0433937	LIHC
GO:0051172	BP	negative regulation of nitrogen compound metabolic process	2373	45	0.0433981	LIHC
GO:1905239	BP	regulation of canonical Wnt signaling pathway involved in osteoblast differentiation	4	1	0.0434946	LIHC
GO:0007506	BP	gonadal mesoderm development	2	1	0.0438759	LIHC
GO:1901699	BP	cellular response to nitrogen compound	682	17	0.0439137	LIHC
GO:0045745	BP	positive regulation of G protein-coupled receptor signaling pathway	27	2	0.0440264	LIHC
GO:0034688	CC	integrin alphaM-beta2 complex	2	1	0.0440512	LIHC
GO:0045914	BP	negative regulation of catecholamine metabolic process	2	1	0.0440512	LIHC
GO:0045963	BP	negative regulation of dopamine metabolic process	2	1	0.0440512	LIHC
GO:0048644	BP	muscle organ morphogenesis	80	4	0.0442259	LIHC
GO:0030149	BP	sphingolipid catabolic process	32	2	0.0442534	LIHC
GO:0031983	CC	vesicle lumen	316	8	0.0443659	LIHC
GO:0005150	MF	interleukin-1, type I receptor binding	2	1	0.0444391	LIHC
GO:2000983	BP	regulation of ATP citrate synthase activity	2	1	0.0444821	LIHC
GO:2000466	BP	negative regulation of glycogen (starch) synthase activity	3	1	0.0445327	LIHC
GO:0002712	BP	regulation of B cell mediated immunity	60	3	0.044752	LIHC
GO:0002889	BP	regulation of immunoglobulin mediated immune response	60	3	0.044752	LIHC
GO:0035662	MF	Toll-like receptor 4 binding	4	1	0.0447743	LIHC
GO:0002456	BP	T cell mediated immunity	104	4	0.0450591	LIHC
GO:0005253	MF	anion channel activity	87	4	0.0451558	LIHC
GO:0042760	BP	very long-chain fatty acid catabolic process	7	1	0.0451881	LIHC
GO:0071787	BP	endoplasmic reticulum tubular network formation	4	1	0.0452722	LIHC
GO:0055010	BP	ventricular cardiac muscle tissue morphogenesis	46	3	0.0458102	LIHC
GO:0051031	BP	tRNA transport	6	1	0.0458928	LIHC
GO:0034707	CC	chloride channel complex	51	3	0.0460356	LIHC
GO:0030667	CC	secretory granule membrane	307	8	0.0462454	LIHC
GO:0001916	BP	positive regulation of T cell mediated cytotoxicity	29	2	0.0463629	LIHC
GO:0099538	BP	synaptic signaling via neuropeptide	3	1	0.0466327	LIHC
GO:0099563	BP	modification of synaptic structure	19	2	0.0467641	LIHC
GO:0045595	BP	regulation of cell differentiation	1594	35	0.046808	LIHC
GO:0010470	BP	regulation of gastrulation	16	2	0.0470552	LIHC
GO:0046811	MF	histone deacetylase inhibitor activity	2	1	0.0477308	LIHC
GO:0036120	BP	cellular response to platelet-derived growth factor stimulus	22	2	0.0477859	LIHC
GO:0006116	BP	NADH oxidation	5	1	0.0479274	LIHC
GO:0070820	CC	tertiary granule	161	5	0.0481681	LIHC
GO:0048565	BP	digestive tract development	130	6	0.0482418	LIHC
GO:0050770	BP	regulation of axonogenesis	155	7	0.0486938	LIHC
GO:0090634	BP	microglial cell mediated cytotoxicity	5	1	0.0487727	LIHC
GO:1904149	BP	regulation of microglial cell mediated cytotoxicity	5	1	0.0487727	LIHC
GO:0101003	CC	ficolin-1-rich granule membrane	60	3	0.0487984	LIHC
GO:1990809	BP	endoplasmic reticulum tubular network membrane organization	4	1	0.0489285	LIHC
GO:0044743	BP	protein transmembrane import into intracellular organelle	34	2	0.0489629	LIHC
GO:0010972	BP	negative regulation of G2/M transition of mitotic cell cycle	63	3	0.0492906	LIHC
GO:0002522	BP	leukocyte migration involved in immune response	3	1	0.0493179	LIHC
GO:0002698	BP	negative regulation of immune effector process	117	4	0.0494907	LIHC
GO:1901995	BP	positive regulation of meiotic cell cycle phase transition	4	1	0.0495991	LIHC
GO:0002587	BP	negative regulation of antigen processing and presentation of peptide antigen via MHC class II	2	1	0.0496588	LIHC
GO:0010605	BP	negative regulation of macromolecule metabolic process	3069	52	0.0497818	LIHC
GO:0033627	BP	cell adhesion mediated by integrin	88	4	0.0498735	LIHC

## Sheet: LUAD
ID	ONTOLOGY	TERM	N	DE	P.DE	Cancer
GO:0000146	MF	microfilament motor activity	37	5	0.000341524	LUAD
GO:0071285	BP	cellular response to lithium ion	13	3	0.000621686	LUAD
GO:0048667	BP	cell morphogenesis involved in neuron differentiation	559	22	0.000876494	LUAD
GO:0043260	CC	laminin-11 complex	3	2	0.000891616	LUAD
GO:0061043	BP	regulation of vascular wound healing	13	3	0.00106792	LUAD
GO:0016459	CC	myosin complex	56	5	0.00140156	LUAD
GO:0014902	BP	myotube differentiation	127	8	0.00147411	LUAD
GO:0007409	BP	axonogenesis	436	18	0.00174837	LUAD
GO:0061564	BP	axon development	486	19	0.00190307	LUAD
GO:0035470	BP	positive regulation of vascular wound healing	5	2	0.00190646	LUAD
GO:0014044	BP	Schwann cell development	32	4	0.00201201	LUAD
GO:0000902	BP	cell morphogenesis	1005	30	0.00242072	LUAD
GO:0061469	BP	regulation of type B pancreatic cell proliferation	16	3	0.00246536	LUAD
GO:0003360	BP	brainstem development	8	2	0.00261465	LUAD
GO:0048812	BP	neuron projection morphogenesis	619	22	0.00291299	LUAD
GO:0000904	BP	cell morphogenesis involved in differentiation	717	24	0.00293033	LUAD
GO:0060523	BP	prostate epithelial cord elongation	3	2	0.00295918	LUAD
GO:0036458	MF	hepatocyte growth factor binding	1	1	0.00307701	LUAD
GO:0061548	BP	ganglion development	17	3	0.00310311	LUAD
GO:0005903	CC	brush border	99	6	0.00327534	LUAD
GO:0035116	BP	embryonic hindlimb morphogenesis	28	4	0.00366734	LUAD
GO:0120039	BP	plasma membrane bounded cell projection morphogenesis	635	22	0.00388746	LUAD
GO:0000981	MF	DNA-binding transcription factor activity, RNA polymerase II-specific	1296	30	0.00408774	LUAD
GO:0014037	BP	Schwann cell differentiation	38	4	0.00411505	LUAD
GO:0048858	BP	cell projection morphogenesis	640	22	0.00414499	LUAD
GO:0061042	BP	vascular wound healing	21	3	0.0043152	LUAD
GO:0030050	BP	vesicle transport along actin filament	19	3	0.00433833	LUAD
GO:0060664	BP	epithelial cell proliferation involved in salivary gland morphogenesis	5	2	0.00439718	LUAD
GO:0060737	BP	prostate gland morphogenetic growth	4	2	0.00445055	LUAD
GO:0048566	BP	embryonic digestive tract development	32	4	0.00458947	LUAD
GO:0097240	BP	chromosome attachment to the nuclear envelope	6	2	0.00465194	LUAD
GO:0051149	BP	positive regulation of muscle cell differentiation	82	5	0.00480466	LUAD
GO:0032990	BP	cell part morphogenesis	659	22	0.00510149	LUAD
GO:0005912	CC	adherens junction	176	9	0.00515075	LUAD
GO:0010226	BP	response to lithium ion	24	3	0.00517059	LUAD
GO:1990837	MF	sequence-specific double-stranded DNA binding	1498	33	0.00523415	LUAD
GO:0018024	MF	histone-lysine N-methyltransferase activity	42	4	0.00526864	LUAD
GO:0032783	CC	super elongation complex	7	2	0.00533367	LUAD
GO:0007418	BP	ventral midline development	6	2	0.00540765	LUAD
GO:0060916	BP	mesenchymal cell proliferation involved in lung development	6	2	0.00565129	LUAD
GO:0009653	BP	anatomical structure morphogenesis	2738	58	0.00570208	LUAD
GO:0003700	MF	DNA-binding transcription factor activity	1339	30	0.0059038	LUAD
GO:0099515	BP	actin filament-based transport	21	3	0.00590662	LUAD
GO:0003690	MF	double-stranded DNA binding	1594	34	0.00609936	LUAD
GO:0072274	BP	metanephric glomerular basement membrane development	1	1	0.00630811	LUAD
GO:0038093	BP	Fc receptor signaling pathway	53	4	0.00639006	LUAD
GO:0048557	BP	embryonic digestive tract morphogenesis	17	3	0.00640061	LUAD
GO:0016768	MF	spermine synthase activity	1	1	0.00648039	LUAD
GO:0051147	BP	regulation of muscle cell differentiation	159	7	0.00658874	LUAD
GO:0035107	BP	appendage morphogenesis	142	8	0.00679969	LUAD
GO:0035108	BP	limb morphogenesis	142	8	0.00679969	LUAD
GO:0043565	MF	sequence-specific DNA binding	1595	34	0.00697495	LUAD
GO:1903489	BP	positive regulation of lactation	2	1	0.00707454	LUAD
GO:0002148	BP	hypochlorous acid metabolic process	1	1	0.00726352	LUAD
GO:0002149	BP	hypochlorous acid biosynthetic process	1	1	0.00726352	LUAD
GO:1990791	BP	dorsal root ganglion development	7	2	0.00731992	LUAD
GO:0035137	BP	hindlimb morphogenesis	35	4	0.00776031	LUAD
GO:1900748	BP	positive regulation of vascular endothelial growth factor signaling pathway	7	2	0.00857212	LUAD
GO:1900100	BP	positive regulation of plasma cell differentiation	3	1	0.00871836	LUAD
GO:0016279	MF	protein-lysine N-methyltransferase activity	56	4	0.00893322	LUAD
GO:0060055	BP	angiogenesis involved in wound healing	30	3	0.00914681	LUAD
GO:0016278	MF	lysine N-methyltransferase activity	57	4	0.00920582	LUAD
GO:0031069	BP	hair follicle morphogenesis	30	3	0.00949002	LUAD
GO:0007631	BP	feeding behavior	107	5	0.00956231	LUAD
GO:0003937	MF	IMP cyclohydrolase activity	1	1	0.010025	LUAD
GO:0004643	MF	phosphoribosylaminoimidazolecarboxamide formyltransferase activity	1	1	0.010025	LUAD
GO:0042834	MF	peptidoglycan binding	17	2	0.0100995	LUAD
GO:0060462	BP	lung lobe development	7	2	0.0102278	LUAD
GO:0060463	BP	lung lobe morphogenesis	7	2	0.0102278	LUAD
GO:0002679	BP	respiratory burst involved in defense response	14	2	0.010272	LUAD
GO:0007442	BP	hindgut morphogenesis	7	2	0.0107285	LUAD
GO:0004946	MF	bombesin receptor activity	2	1	0.0107661	LUAD
GO:0031989	BP	bombesin receptor signaling pathway	2	1	0.0107661	LUAD
GO:0044342	BP	type B pancreatic cell proliferation	27	3	0.0110757	LUAD
GO:0001162	MF	RNA polymerase II intronic transcription regulatory region sequence-specific DNA binding	8	2	0.0111566	LUAD
GO:0048730	BP	epidermis morphogenesis	34	3	0.011377	LUAD
GO:0042692	BP	muscle cell differentiation	405	13	0.0113909	LUAD
GO:0000977	MF	RNA polymerase II transcription regulatory region sequence-specific DNA binding	1348	29	0.0115759	LUAD
GO:0060076	CC	excitatory synapse	51	4	0.011607	LUAD
GO:0021536	BP	diencephalon development	75	5	0.0116714	LUAD
GO:0061525	BP	hindgut development	8	2	0.0117923	LUAD
GO:0006990	BP	positive regulation of transcription from RNA polymerase II promoter involved in unfolded protein response	3	1	0.0118574	LUAD
GO:0033089	BP	positive regulation of T cell differentiation in thymus	11	2	0.0120021	LUAD
GO:0033301	BP	cell cycle comprising mitosis without cytokinesis	1	1	0.0121137	LUAD
GO:0060484	BP	lung-associated mesenchyme development	8	2	0.0126012	LUAD
GO:0045740	BP	positive regulation of DNA replication	40	3	0.0126792	LUAD
GO:0070403	MF	NAD+ binding	16	2	0.0127152	LUAD
GO:0090160	BP	Golgi to lysosome transport	11	2	0.0131487	LUAD
GO:0072015	BP	podocyte development	12	2	0.0132288	LUAD
GO:0030379	MF	neurotensin receptor activity, non-G protein-coupled	1	1	0.0136583	LUAD
GO:1904702	BP	regulation of protein localization to adherens junction	1	1	0.0138023	LUAD
GO:0009444	BP	pyruvate oxidation	1	1	0.0138649	LUAD
GO:0038097	BP	positive regulation of mast cell activation by Fc-epsilon receptor signaling pathway	1	1	0.0138649	LUAD
GO:0036498	BP	IRE1-mediated unfolded protein response	20	2	0.0139463	LUAD
GO:0006555	BP	methionine metabolic process	16	2	0.0140367	LUAD
GO:0021723	BP	medullary reticular formation development	1	1	0.014038	LUAD
GO:0048892	BP	lateral line nerve development	1	1	0.014038	LUAD
GO:0048894	BP	efferent axon development in a lateral line nerve	1	1	0.014038	LUAD
GO:0061451	BP	retrotrapezoid nucleus development	1	1	0.014038	LUAD
GO:0061452	BP	retrotrapezoid nucleus neuron differentiation	1	1	0.014038	LUAD
GO:0071244	BP	cellular response to carbon dioxide	1	1	0.014038	LUAD
GO:0042054	MF	histone methyltransferase activity	58	4	0.014058	LUAD
GO:1903487	BP	regulation of lactation	3	1	0.0143122	LUAD
GO:0000711	BP	meiotic DNA repair synthesis	3	1	0.0144541	LUAD
GO:0022011	BP	myelination in peripheral nervous system	29	3	0.014469	LUAD
GO:0032292	BP	peripheral nervous system axon ensheathment	29	3	0.014469	LUAD
GO:0050679	BP	positive regulation of epithelial cell proliferation	220	8	0.0144714	LUAD
GO:0000987	MF	cis-regulatory region sequence-specific DNA binding	1167	26	0.0146672	LUAD
GO:1902667	BP	regulation of axon guidance	12	2	0.0149149	LUAD
GO:0002431	BP	Fc receptor mediated stimulatory signaling pathway	33	3	0.0152033	LUAD
GO:0001532	MF	interleukin-21 receptor activity	1	1	0.0152889	LUAD
GO:0038114	BP	interleukin-21-mediated signaling pathway	1	1	0.0152889	LUAD
GO:0098756	BP	response to interleukin-21	1	1	0.0152889	LUAD
GO:0098757	BP	cellular response to interleukin-21	1	1	0.0152889	LUAD
GO:1904752	BP	regulation of vascular associated smooth muscle cell migration	45	3	0.0157147	LUAD
GO:0090536	CC	NoRC complex	1	1	0.016013	LUAD
GO:0043297	BP	apical junction assembly	74	4	0.0162359	LUAD
GO:0048546	BP	digestive tract morphogenesis	48	4	0.0162373	LUAD
GO:0072310	BP	glomerular epithelial cell development	13	2	0.0162874	LUAD
GO:0098637	CC	protein complex involved in cell-matrix adhesion	14	2	0.0163052	LUAD
GO:0003677	MF	DNA binding	2384	42	0.0165801	LUAD
GO:0032836	BP	glomerular basement membrane development	11	2	0.0170438	LUAD
GO:0046452	BP	dihydrofolate metabolic process	3	1	0.0172696	LUAD
GO:0097486	CC	multivesicular body lumen	5	1	0.017316	LUAD
GO:0048736	BP	appendage development	177	8	0.0174778	LUAD
GO:0060173	BP	limb development	177	8	0.0174778	LUAD
GO:0000976	MF	transcription cis-regulatory region binding	1441	30	0.0176002	LUAD
GO:0006597	BP	spermine biosynthetic process	2	1	0.0177856	LUAD
GO:0002053	BP	positive regulation of mesenchymal cell proliferation	23	3	0.0178095	LUAD
GO:0016328	CC	lateral plasma membrane	64	4	0.0178339	LUAD
GO:0006275	BP	regulation of DNA replication	134	5	0.0179435	LUAD
GO:0032989	BP	cellular component morphogenesis	761	22	0.0180135	LUAD
GO:0001067	MF	transcription regulatory region nucleic acid binding	1443	30	0.018023	LUAD
GO:1990889	MF	H4K20me3 modified histone binding	2	1	0.0180378	LUAD
GO:0009790	BP	embryo development	1117	27	0.0181664	LUAD
GO:1903036	BP	positive regulation of response to wounding	76	4	0.0184885	LUAD
GO:0000978	MF	RNA polymerase II cis-regulatory region sequence-specific DNA binding	1147	25	0.01916	LUAD
GO:1904738	BP	vascular associated smooth muscle cell migration	47	3	0.0193658	LUAD
GO:0007422	BP	peripheral nervous system development	81	5	0.0198557	LUAD
GO:0045582	BP	positive regulation of T cell differentiation	117	5	0.0207395	LUAD
GO:0031213	CC	RSF complex	2	1	0.0208618	LUAD
GO:0140751	MF	histone octamer slider activity	2	1	0.0208618	LUAD
GO:0003920	MF	GMP reductase activity	2	1	0.0208795	LUAD
GO:0046857	MF	oxidoreductase activity, acting on other nitrogenous compounds as donors, with NAD or NADP as acceptor	2	1	0.0208795	LUAD
GO:1902560	CC	GMP reductase complex	2	1	0.0208795	LUAD
GO:0060092	BP	regulation of synaptic transmission, glycinergic	1	1	0.0213268	LUAD
GO:0098862	CC	cluster of actin-based cell projections	154	6	0.0219671	LUAD
GO:0016590	CC	ACF complex	2	1	0.0220689	LUAD
GO:0060272	BP	embryonic skeletal joint morphogenesis	11	2	0.0223369	LUAD
GO:0051287	MF	NAD binding	53	3	0.0224142	LUAD
GO:0007043	BP	cell-cell junction assembly	147	6	0.0226883	LUAD
GO:0031175	BP	neuron projection development	953	25	0.0228605	LUAD
GO:0060736	BP	prostate gland growth	12	2	0.0232128	LUAD
GO:0110011	BP	regulation of basement membrane organization	11	2	0.0232925	LUAD
GO:0072244	BP	metanephric glomerular epithelium development	3	1	0.0234733	LUAD
GO:0072248	BP	metanephric podocyte differentiation	3	1	0.0234733	LUAD
GO:0072249	BP	metanephric podocyte development	3	1	0.0234733	LUAD
GO:0072312	BP	metanephric glomerular epithelial cell differentiation	3	1	0.0234733	LUAD
GO:0072313	BP	metanephric glomerular epithelial cell development	3	1	0.0234733	LUAD
GO:0055057	BP	neuroblast division	14	2	0.0237322	LUAD
GO:0043256	CC	laminin complex	12	2	0.0237687	LUAD
GO:0060442	BP	branching involved in prostate gland morphogenesis	12	2	0.0238704	LUAD
GO:0004960	MF	thromboxane receptor activity	1	1	0.0239616	LUAD
GO:0004961	MF	thromboxane A2 receptor activity	1	1	0.0239616	LUAD
GO:0038193	BP	thromboxane A2 signaling pathway	1	1	0.0239616	LUAD
GO:0007218	BP	neuropeptide signaling pathway	108	4	0.024273	LUAD
GO:0060174	BP	limb bud formation	11	2	0.0242788	LUAD
GO:0001161	MF	intronic transcription regulatory region sequence-specific DNA binding	11	2	0.0243507	LUAD
GO:0048755	BP	branching morphogenesis of a nerve	11	2	0.0244215	LUAD
GO:0007411	BP	axon guidance	235	10	0.0254097	LUAD
GO:0097485	BP	neuron projection guidance	236	10	0.0263427	LUAD
GO:1904691	BP	negative regulation of type B pancreatic cell proliferation	3	1	0.0263836	LUAD
GO:0034333	BP	adherens junction assembly	13	2	0.0264551	LUAD
GO:0005524	MF	ATP binding	1439	29	0.0265795	LUAD
GO:0098529	BP	neuromuscular junction development, skeletal muscle fiber	1	1	0.0267159	LUAD
GO:1904806	BP	regulation of protein oxidation	1	1	0.0267729	LUAD
GO:1904808	BP	positive regulation of protein oxidation	1	1	0.0267729	LUAD
GO:2001046	BP	positive regulation of integrin-mediated signaling pathway	13	2	0.0272147	LUAD
GO:0045576	BP	mast cell activation	64	3	0.0273052	LUAD
GO:0060601	BP	lateral sprouting from an epithelium	11	2	0.0278626	LUAD
GO:0014904	BP	myotube cell development	42	3	0.0281419	LUAD
GO:0000737	BP	DNA catabolic process, endonucleolytic	25	2	0.0281575	LUAD
GO:0070192	BP	chromosome organization involved in meiotic cell cycle	73	3	0.0282289	LUAD
GO:0021768	BP	nucleus accumbens development	1	1	0.0283966	LUAD
GO:0035853	BP	chromosome passenger complex localization to spindle midzone	1	1	0.028741	LUAD
GO:0072272	BP	proximal/distal pattern formation involved in metanephric nephron development	2	1	0.0291918	LUAD
GO:0042476	BP	odontogenesis	134	6	0.0296691	LUAD
GO:0051054	BP	positive regulation of DNA metabolic process	297	8	0.0296817	LUAD
GO:0005043	MF	netrin receptor activity involved in chemorepulsion	1	1	0.0297055	LUAD
GO:0004525	MF	ribonuclease III activity	2	1	0.0297554	LUAD
GO:0032296	MF	double-stranded RNA-specific ribonuclease activity	2	1	0.0297554	LUAD
GO:0003774	MF	cytoskeletal motor activity	110	5	0.0297592	LUAD
GO:0140110	MF	transcription regulator activity	1827	35	0.029883	LUAD
GO:0070084	BP	protein initiator methionine removal	3	1	0.029928	LUAD
GO:0050104	MF	L-gulonate 3-dehydrogenase activity	1	1	0.0301416	LUAD
GO:0004430	MF	1-phosphatidylinositol 4-kinase activity	4	1	0.030189	LUAD
GO:0031906	CC	late endosome lumen	7	1	0.0301963	LUAD
GO:0030326	BP	embryonic limb morphogenesis	118	6	0.0302666	LUAD
GO:0035113	BP	embryonic appendage morphogenesis	118	6	0.0302666	LUAD
GO:0009949	BP	polarity specification of anterior/posterior axis	1	1	0.0304481	LUAD
GO:0060781	BP	mesenchymal cell proliferation involved in prostate gland development	1	1	0.0304481	LUAD
GO:0060782	BP	regulation of mesenchymal cell proliferation involved in prostate gland development	1	1	0.0304481	LUAD
GO:0060783	BP	mesenchymal smoothened signaling pathway involved in prostate gland development	1	1	0.0304481	LUAD
GO:0061189	BP	positive regulation of sclerotome development	1	1	0.0304481	LUAD
GO:0061190	BP	regulation of sclerotome development	1	1	0.0304481	LUAD
GO:0072195	BP	kidney smooth muscle cell differentiation	1	1	0.0304481	LUAD
GO:1905327	BP	tracheoesophageal septum formation	1	1	0.0304481	LUAD
GO:2000061	BP	regulation of ureter smooth muscle cell differentiation	1	1	0.0304481	LUAD
GO:2000062	BP	negative regulation of ureter smooth muscle cell differentiation	1	1	0.0304481	LUAD
GO:2000063	BP	positive regulation of ureter smooth muscle cell differentiation	1	1	0.0304481	LUAD
GO:2000356	BP	regulation of kidney smooth muscle cell differentiation	1	1	0.0304481	LUAD
GO:2000357	BP	negative regulation of kidney smooth muscle cell differentiation	1	1	0.0304481	LUAD
GO:2000358	BP	positive regulation of kidney smooth muscle cell differentiation	1	1	0.0304481	LUAD
GO:0032877	BP	positive regulation of DNA endoreduplication	2	1	0.0305943	LUAD
GO:0045621	BP	positive regulation of lymphocyte differentiation	129	5	0.030595	LUAD
GO:0001984	BP	artery vasodilation involved in baroreceptor response to increased systemic arterial blood pressure	1	1	0.0306627	LUAD
GO:0008623	CC	CHRAC	4	1	0.0306696	LUAD
GO:0008170	MF	N-methyltransferase activity	95	4	0.0306984	LUAD
GO:0035115	BP	embryonic forelimb morphogenesis	32	3	0.0310583	LUAD
GO:0070455	BP	positive regulation of heme biosynthetic process	3	1	0.0314916	LUAD
GO:1901465	BP	positive regulation of tetrapyrrole biosynthetic process	3	1	0.0314916	LUAD
GO:0002189	CC	ribose phosphate diphosphokinase complex	5	1	0.0318509	LUAD
GO:0004749	MF	ribose phosphate diphosphokinase activity	5	1	0.0318509	LUAD
GO:0030175	CC	filopodium	108	5	0.0323588	LUAD
GO:0035602	BP	fibroblast growth factor receptor signaling pathway involved in negative regulation of apoptotic process in bone marrow cell	1	1	0.0326737	LUAD
GO:0035603	BP	fibroblast growth factor receptor signaling pathway involved in hemopoiesis	1	1	0.0326737	LUAD
GO:0035604	BP	fibroblast growth factor receptor signaling pathway involved in positive regulation of cell proliferation in bone marrow	1	1	0.0326737	LUAD
GO:0035607	BP	fibroblast growth factor receptor signaling pathway involved in orbitofrontal cortex development	1	1	0.0326737	LUAD
GO:0010037	BP	response to carbon dioxide	3	1	0.032808	LUAD
GO:0008276	MF	protein methyltransferase activity	89	4	0.0329881	LUAD
GO:0048666	BP	neuron development	1098	27	0.0330438	LUAD
GO:0032496	BP	response to lipopolysaccharide	326	8	0.0333993	LUAD
GO:0010464	BP	regulation of mesenchymal cell proliferation	30	3	0.0334618	LUAD
GO:0033744	MF	L-methionine:thioredoxin-disulfide S-oxidoreductase activity	1	1	0.0335227	LUAD
GO:0036456	MF	L-methionine-(S)-S-oxide reductase activity	1	1	0.0335227	LUAD
GO:1904753	BP	negative regulation of vascular associated smooth muscle cell migration	25	2	0.0338484	LUAD
GO:0090535	CC	WICH complex	2	1	0.0338605	LUAD
GO:1903379	BP	regulation of mitotic chromosome condensation	2	1	0.0338605	LUAD
GO:1905213	BP	negative regulation of mitotic chromosome condensation	2	1	0.0338605	LUAD
GO:0061845	CC	neuron projection branch point	1	1	0.0341051	LUAD
GO:0061846	CC	dendritic spine cytoplasm	1	1	0.0341051	LUAD
GO:0099564	BP	modification of synaptic structure, modulating synaptic transmission	1	1	0.0341051	LUAD
GO:1990809	BP	endoplasmic reticulum tubular network membrane organization	4	1	0.0341324	LUAD
GO:1990267	BP	response to transition metal nanoparticle	2	1	0.0343663	LUAD
GO:1990268	BP	response to gold nanoparticle	2	1	0.0343663	LUAD
GO:0051754	BP	meiotic sister chromatid cohesion, centromeric	4	1	0.034968	LUAD
GO:0021847	BP	ventricular zone neuroblast division	2	1	0.0351595	LUAD
GO:2000251	BP	positive regulation of actin cytoskeleton reorganization	19	2	0.03516	LUAD
GO:0009880	BP	embryonic pattern specification	74	4	0.0351979	LUAD
GO:0008360	BP	regulation of cell shape	154	6	0.0352486	LUAD
GO:0007169	BP	transmembrane receptor protein tyrosine kinase signaling pathway	626	16	0.0353376	LUAD
GO:0060572	BP	morphogenesis of an epithelial bud	15	2	0.0355993	LUAD
GO:0038095	BP	Fc-epsilon receptor signaling pathway	24	2	0.0359225	LUAD
GO:0032765	BP	positive regulation of mast cell cytokine production	4	1	0.0361325	LUAD
GO:0045945	BP	positive regulation of transcription by RNA polymerase III	18	2	0.0363156	LUAD
GO:1990418	BP	response to insulin-like growth factor stimulus	3	1	0.0365201	LUAD
GO:0045893	BP	positive regulation of DNA-templated transcription	1651	33	0.0365931	LUAD
GO:1903508	BP	positive regulation of nucleic acid-templated transcription	1651	33	0.0365931	LUAD
GO:0016814	MF	hydrolase activity, acting on carbon-nitrogen (but not peptide) bonds, in cyclic amidines	35	2	0.0366067	LUAD
GO:0005884	CC	actin filament	113	5	0.0367695	LUAD
GO:0008113	MF	peptide-methionine (S)-S-oxide reductase activity	2	1	0.0368139	LUAD
GO:0030262	BP	apoptotic nuclear changes	26	2	0.0373809	LUAD
GO:1902680	BP	positive regulation of RNA biosynthetic process	1657	33	0.0374426	LUAD
GO:1990227	BP	paranodal junction maintenance	2	1	0.0377593	LUAD
GO:0035497	MF	cAMP response element binding	17	2	0.0377824	LUAD
GO:0010830	BP	regulation of myotube differentiation	46	3	0.0378025	LUAD
GO:1902107	BP	positive regulation of leukocyte differentiation	182	6	0.0378139	LUAD
GO:1903708	BP	positive regulation of hemopoiesis	182	6	0.0378139	LUAD
GO:0015119	MF	hexose phosphate transmembrane transporter activity	3	1	0.0380116	LUAD
GO:0015152	MF	glucose-6-phosphate transmembrane transporter activity	3	1	0.0380116	LUAD
GO:0015315	MF	organophosphate:inorganic phosphate antiporter activity	3	1	0.0380116	LUAD
GO:0015526	MF	hexose-phosphate:inorganic phosphate antiporter activity	3	1	0.0380116	LUAD
GO:0061513	MF	glucose 6-phosphate:inorganic phosphate antiporter activity	3	1	0.0380116	LUAD
GO:0035356	BP	cellular triglyceride homeostasis	7	1	0.0382592	LUAD
GO:0072658	BP	maintenance of protein location in membrane	2	1	0.0383808	LUAD
GO:0072660	BP	maintenance of protein location in plasma membrane	2	1	0.0383808	LUAD
GO:0006189	BP	'de novo' IMP biosynthetic process	6	1	0.0386537	LUAD
GO:0021983	BP	pituitary gland development	41	3	0.0386816	LUAD
GO:0035861	CC	site of double-strand break	76	3	0.0388396	LUAD
GO:0006640	BP	monoacylglycerol biosynthetic process	7	1	0.038888	LUAD
GO:0021782	BP	glial cell development	117	5	0.0398638	LUAD
GO:0035639	MF	purine ribonucleoside triphosphate binding	1764	32	0.0399365	LUAD
GO:1905224	BP	clathrin-coated pit assembly	2	1	0.0399621	LUAD
GO:0010465	MF	nerve growth factor receptor activity	2	1	0.0402571	LUAD
GO:0006015	BP	5-phosphoribose 1-diphosphate biosynthetic process	6	1	0.0403408	LUAD
GO:0046391	BP	5-phosphoribose 1-diphosphate metabolic process	6	1	0.0403408	LUAD
GO:0035267	CC	NuA4 histone acetyltransferase complex	27	2	0.0403818	LUAD
GO:0043189	CC	H4/H2A histone acetyltransferase complex	27	2	0.0403818	LUAD
GO:0018130	BP	heterocycle biosynthetic process	3872	61	0.0403927	LUAD
GO:0071332	BP	cellular response to fructose stimulus	3	1	0.0405195	LUAD
GO:0006896	BP	Golgi to vacuole transport	20	2	0.0408006	LUAD
GO:0072498	BP	embryonic skeletal joint development	15	2	0.0408283	LUAD
GO:0002237	BP	response to molecule of bacterial origin	345	8	0.041118	LUAD
GO:1902870	BP	negative regulation of amacrine cell differentiation	3	1	0.0412373	LUAD
GO:0031752	MF	D5 dopamine receptor binding	2	1	0.0413184	LUAD
GO:0004471	MF	malate dehydrogenase (decarboxylating) (NAD+) activity	3	1	0.0413409	LUAD
GO:0004473	MF	malate dehydrogenase (decarboxylating) (NADP+) activity	3	1	0.0413409	LUAD
GO:0060447	BP	bud outgrowth involved in lung branching	2	1	0.0413445	LUAD
GO:0060459	BP	left lung development	2	1	0.0416737	LUAD
GO:1900098	BP	regulation of plasma cell differentiation	5	1	0.0417085	LUAD
GO:0060529	BP	squamous basal epithelial stem cell differentiation involved in prostate gland acinus development	2	1	0.0417342	LUAD
GO:0006308	BP	DNA catabolic process	31	2	0.0417549	LUAD
GO:0002522	BP	leukocyte migration involved in immune response	3	1	0.0418465	LUAD
GO:0045728	BP	respiratory burst after phagocytosis	4	1	0.0418782	LUAD
GO:0016540	BP	protein autoprocessing	26	2	0.0421678	LUAD
GO:0032559	MF	adenyl ribonucleotide binding	1502	29	0.0422364	LUAD
GO:0030289	CC	protein phosphatase 4 complex	6	1	0.0422508	LUAD
GO:0008048	MF	calcium sensitive guanylate cyclase activator activity	5	1	0.0423494	LUAD
GO:0071344	BP	diphosphate metabolic process	3	1	0.0424571	LUAD
GO:0051146	BP	striated muscle cell differentiation	291	9	0.0425084	LUAD
GO:0004305	MF	ethanolamine kinase activity	4	1	0.0427079	LUAD
GO:0004520	MF	endodeoxyribonuclease activity	36	2	0.0428955	LUAD
GO:0019438	BP	aromatic compound biosynthetic process	3886	61	0.0430356	LUAD
GO:0001978	BP	regulation of systemic arterial blood pressure by carotid sinus baroreceptor feedback	2	1	0.0430645	LUAD
GO:0001983	BP	baroreceptor response to increased systemic arterial blood pressure	2	1	0.0430645	LUAD
GO:0030902	BP	hindbrain development	150	6	0.0431421	LUAD
GO:0032777	CC	Piccolo NuA4 histone acetyltransferase complex	4	1	0.0431588	LUAD
GO:0032875	BP	regulation of DNA endoreduplication	3	1	0.043222	LUAD
GO:0060595	BP	fibroblast growth factor receptor signaling pathway involved in mammary gland specification	2	1	0.0435451	LUAD
GO:0060615	BP	mammary gland bud formation	2	1	0.0435451	LUAD
GO:0060667	BP	branch elongation involved in salivary gland morphogenesis	2	1	0.0435451	LUAD
GO:0060915	BP	mesenchymal cell differentiation involved in lung development	2	1	0.0435451	LUAD
GO:0051155	BP	positive regulation of striated muscle cell differentiation	53	3	0.0437032	LUAD
GO:0048643	BP	positive regulation of skeletal muscle tissue development	20	2	0.0438102	LUAD
GO:0005608	CC	laminin-3 complex	3	1	0.043963	LUAD
GO:0004470	MF	malic enzyme activity	4	1	0.0443476	LUAD
GO:0034654	BP	nucleobase-containing compound biosynthetic process	3802	60	0.0444126	LUAD
GO:0010510	BP	regulation of acetyl-CoA biosynthetic process from pyruvate	4	1	0.0446578	LUAD
GO:0030554	MF	adenyl nucleotide binding	1514	29	0.0447958	LUAD
GO:0014858	BP	positive regulation of skeletal muscle cell proliferation	3	1	0.0448388	LUAD
GO:2000616	BP	negative regulation of histone H3-K9 acetylation	3	1	0.0449397	LUAD
GO:2001044	BP	regulation of integrin-mediated signaling pathway	22	2	0.0450448	LUAD
GO:0150106	BP	regulation of protein localization to cell-cell junction	3	1	0.0451446	LUAD
GO:1900623	BP	regulation of monocyte aggregation	3	1	0.0452216	LUAD
GO:1900625	BP	positive regulation of monocyte aggregation	3	1	0.0452216	LUAD
GO:0060516	BP	primary prostatic bud elongation	2	1	0.0456616	LUAD
GO:0008948	MF	oxaloacetate decarboxylase activity	4	1	0.0458708	LUAD
GO:0097038	CC	perinuclear endoplasmic reticulum	21	2	0.04588	LUAD
GO:0043299	BP	leukocyte degranulation	75	3	0.0459305	LUAD
GO:0031716	MF	calcitonin receptor binding	2	1	0.0460323	LUAD
GO:0002702	BP	positive regulation of production of molecular mediator of immune response	129	4	0.0463307	LUAD
GO:0098795	BP	global gene silencing by mRNA cleavage	4	1	0.0465812	LUAD
GO:0051153	BP	regulation of striated muscle cell differentiation	96	4	0.0467063	LUAD
GO:0003846	MF	2-acylglycerol O-acyltransferase activity	7	1	0.0467626	LUAD
GO:0097292	BP	XMP metabolic process	7	1	0.0467884	LUAD
GO:0097293	BP	XMP biosynthetic process	7	1	0.0467884	LUAD
GO:0097294	BP	'de novo' XMP biosynthetic process	7	1	0.0467884	LUAD
GO:0045730	BP	respiratory burst	33	2	0.0468959	LUAD
GO:0030027	CC	lamellipodium	202	7	0.0469398	LUAD
GO:0014040	BP	positive regulation of Schwann cell differentiation	2	1	0.0469739	LUAD
GO:0006921	BP	cellular component disassembly involved in execution phase of apoptosis	28	2	0.0471359	LUAD
GO:0050699	MF	WW domain binding	32	2	0.047158	LUAD
GO:1990578	CC	perinuclear endoplasmic reticulum membrane	4	1	0.0472594	LUAD
GO:0006357	BP	regulation of transcription by RNA polymerase II	2465	43	0.0473068	LUAD
GO:0090303	BP	positive regulation of wound healing	61	3	0.0474061	LUAD
GO:0000166	MF	nucleotide binding	2089	36	0.0474333	LUAD
GO:0045935	BP	positive regulation of nucleobase-containing compound metabolic process	2001	37	0.0474622	LUAD
GO:1901265	MF	nucleoside phosphate binding	2090	36	0.0475165	LUAD
GO:1904178	BP	negative regulation of adipose tissue development	3	1	0.0476401	LUAD
GO:0048677	BP	axon extension involved in regeneration	3	1	0.0477016	LUAD
GO:0048682	BP	sprouting of injured axon	3	1	0.0477016	LUAD
GO:0005539	MF	glycosaminoglycan binding	229	7	0.0477268	LUAD
GO:0019238	MF	cyclohydrolase activity	5	1	0.047796	LUAD
GO:0035136	BP	forelimb morphogenesis	39	3	0.0478435	LUAD
GO:0061003	BP	positive regulation of dendritic spine morphogenesis	18	2	0.0479613	LUAD
GO:0034398	BP	telomere tethering at nuclear periphery	4	1	0.0481074	LUAD
GO:0044821	BP	meiotic telomere tethering at nuclear periphery	4	1	0.0481074	LUAD
GO:0070197	BP	meiotic attachment of telomere to nuclear envelope	4	1	0.0481074	LUAD
GO:0060602	BP	branch elongation of an epithelium	17	2	0.0481227	LUAD
GO:0016778	MF	diphosphotransferase activity	6	1	0.0482842	LUAD
GO:0060322	BP	head development	791	20	0.0482891	LUAD
GO:0060738	BP	epithelial-mesenchymal signaling involved in prostate gland development	2	1	0.0489901	LUAD
GO:0000096	BP	sulfur amino acid metabolic process	32	2	0.0490508	LUAD
GO:0000801	CC	central element	8	1	0.0490525	LUAD
GO:0060648	BP	mammary gland bud morphogenesis	3	1	0.0491868	LUAD
GO:2000648	BP	positive regulation of stem cell proliferation	53	3	0.0492319	LUAD
GO:0097159	MF	organic cyclic compound binding	5998	83	0.0496363	LUAD
GO:0007227	BP	signal transduction downstream of smoothened	3	1	0.0498241	LUAD
GO:0007228	BP	positive regulation of hh target transcription factor activity	3	1	0.0498241	LUAD
GO:0098942	BP	retrograde trans-synaptic signaling by trans-synaptic protein complex	2	1	0.0498696	LUAD

## Sheet: LUSC
ID	ONTOLOGY	TERM	N	DE	P.DE	Cancer
GO:1904713	MF	beta-catenin destruction complex binding	2	2	0.000200319	LUSC
GO:0040036	BP	regulation of fibroblast growth factor receptor signaling pathway	35	6	0.00032307	LUSC
GO:0048562	BP	embryonic organ morphogenesis	293	19	0.000658155	LUSC
GO:0048706	BP	embryonic skeletal system development	127	12	0.000676468	LUSC
GO:0048704	BP	embryonic skeletal system morphogenesis	94	10	0.000905113	LUSC
GO:0001501	BP	skeletal system development	534	26	0.0010921	LUSC
GO:0007041	BP	lysosomal transport	125	9	0.00121601	LUSC
GO:1905563	BP	negative regulation of vascular endothelial cell proliferation	25	3	0.0012614	LUSC
GO:0098696	BP	regulation of neurotransmitter receptor localization to postsynaptic specialization membrane	9	3	0.00137982	LUSC
GO:1903587	BP	regulation of blood vessel endothelial cell proliferation involved in sprouting angiogenesis	41	4	0.00172046	LUSC
GO:0060995	BP	cell-cell signaling involved in kidney development	2	2	0.00180621	LUSC
GO:0061289	BP	Wnt signaling pathway involved in kidney development	2	2	0.00180621	LUSC
GO:0061290	BP	canonical Wnt signaling pathway involved in metanephric kidney development	2	2	0.00180621	LUSC
GO:0072204	BP	cell-cell signaling involved in metanephros development	2	2	0.00180621	LUSC
GO:1903589	BP	positive regulation of blood vessel endothelial cell proliferation involved in sprouting angiogenesis	19	3	0.00188176	LUSC
GO:0021756	BP	striatum development	21	4	0.00189573	LUSC
GO:0050840	MF	extracellular matrix binding	56	6	0.00230164	LUSC
GO:0048568	BP	embryonic organ development	445	23	0.00246142	LUSC
GO:1903205	BP	regulation of hydrogen peroxide-induced cell death	30	4	0.00249129	LUSC
GO:0004709	MF	MAP kinase kinase kinase activity	26	4	0.00282619	LUSC
GO:0003707	MF	nuclear steroid receptor activity	24	4	0.00346653	LUSC
GO:0036474	BP	cell death in response to hydrogen peroxide	34	4	0.00367932	LUSC
GO:0006627	BP	protein processing involved in protein targeting to mitochondrion	7	2	0.00371874	LUSC
GO:0002042	BP	cell migration involved in sprouting angiogenesis	87	6	0.00379566	LUSC
GO:0061886	BP	negative regulation of mini excitatory postsynaptic potential	1	1	0.00407887	LUSC
GO:0090049	BP	regulation of cell migration involved in sprouting angiogenesis	71	5	0.00440639	LUSC
GO:0060348	BP	bone development	227	13	0.00498883	LUSC
GO:0004923	MF	leukemia inhibitory factor receptor activity	5	2	0.00524921	LUSC
GO:0004924	MF	oncostatin-M receptor activity	5	2	0.00524921	LUSC
GO:0007034	BP	vacuolar transport	158	9	0.00540314	LUSC
GO:0048705	BP	skeletal system morphogenesis	224	14	0.00549523	LUSC
GO:0042364	BP	water-soluble vitamin biosynthetic process	7	2	0.00555044	LUSC
GO:0008052	BP	sensory organ boundary specification	1	1	0.00567565	LUSC
GO:0010160	BP	formation of animal organ boundary	1	1	0.00567565	LUSC
GO:0061193	BP	taste bud development	1	1	0.00567565	LUSC
GO:0042131	MF	thiamine phosphate phosphatase activity	1	1	0.00569992	LUSC
GO:0021544	BP	subpallium development	27	4	0.00582636	LUSC
GO:1903206	BP	negative regulation of hydrogen peroxide-induced cell death	21	3	0.00590299	LUSC
GO:0002043	BP	blood vessel endothelial cell proliferation involved in sprouting angiogenesis	48	4	0.00623528	LUSC
GO:0099633	BP	protein localization to postsynaptic specialization membrane	16	3	0.00632279	LUSC
GO:0099645	BP	neurotransmitter receptor localization to postsynaptic specialization membrane	16	3	0.00632279	LUSC
GO:0038165	BP	oncostatin-M-mediated signaling pathway	6	2	0.00659734	LUSC
GO:1901031	BP	regulation of response to reactive oxygen species	40	4	0.00745141	LUSC
GO:0048598	BP	embryonic morphogenesis	609	27	0.00780426	LUSC
GO:0035136	BP	forelimb morphogenesis	39	5	0.00792638	LUSC
GO:0032473	CC	cytoplasmic side of mitochondrial outer membrane	1	1	0.00794236	LUSC
GO:0034211	MF	GTP-dependent protein kinase activity	1	1	0.00794236	LUSC
GO:0036479	MF	peroxidase inhibitor activity	1	1	0.00794236	LUSC
GO:0099400	CC	caveola neck	1	1	0.00794236	LUSC
GO:1903125	BP	negative regulation of thioredoxin peroxidase activity by peptidyl-threonine phosphorylation	1	1	0.00794236	LUSC
GO:1904887	BP	Wnt signalosome assembly	1	1	0.00794236	LUSC
GO:2000469	BP	negative regulation of peroxidase activity	1	1	0.00794236	LUSC
GO:2000369	BP	regulation of clathrin-dependent endocytosis	19	3	0.00828956	LUSC
GO:0048861	BP	leukemia inhibitory factor signaling pathway	8	2	0.0087116	LUSC
GO:1901032	BP	negative regulation of response to reactive oxygen species	23	3	0.00876613	LUSC
GO:0050867	BP	positive regulation of cell activation	382	15	0.00883829	LUSC
GO:0045794	BP	negative regulation of cell volume	5	2	0.00884409	LUSC
GO:1902683	BP	regulation of receptor localization to synapse	18	3	0.00890773	LUSC
GO:0007169	BP	transmembrane receptor protein tyrosine kinase signaling pathway	626	25	0.00892926	LUSC
GO:0030695	MF	GTPase regulator activity	456	20	0.00905665	LUSC
GO:0060589	MF	nucleoside-triphosphatase regulator activity	456	20	0.00905665	LUSC
GO:0005129	MF	granulocyte macrophage colony-stimulating factor receptor binding	1	1	0.00953536	LUSC
GO:0030326	BP	embryonic limb morphogenesis	118	9	0.0103615	LUSC
GO:0035113	BP	embryonic appendage morphogenesis	118	9	0.0103615	LUSC
GO:0032474	BP	otolith morphogenesis	5	2	0.0104986	LUSC
GO:0004341	MF	gluconolactonase activity	1	1	0.0105199	LUSC
GO:1903011	BP	negative regulation of bone development	1	1	0.0105199	LUSC
GO:1903611	BP	negative regulation of calcium-dependent ATPase activity	1	1	0.0105199	LUSC
GO:1903627	BP	regulation of dUTP diphosphatase activity	1	1	0.0105199	LUSC
GO:1903629	BP	positive regulation of dUTP diphosphatase activity	1	1	0.0105199	LUSC
GO:1903631	BP	negative regulation of aminoacyl-tRNA ligase activity	1	1	0.0105199	LUSC
GO:1903633	BP	regulation of leucine-tRNA ligase activity	1	1	0.0105199	LUSC
GO:1903634	BP	negative regulation of leucine-tRNA ligase activity	1	1	0.0105199	LUSC
GO:0052659	MF	inositol-1,3,4,5-tetrakisphosphate 5-phosphatase activity	6	2	0.0105943	LUSC
GO:0036325	BP	vascular endothelial growth factor receptor-3 signaling pathway	1	1	0.0110332	LUSC
GO:0004897	MF	ciliary neurotrophic factor receptor activity	7	2	0.0114842	LUSC
GO:1902204	BP	positive regulation of hepatocyte growth factor receptor signaling pathway	1	1	0.0119368	LUSC
GO:0045743	BP	positive regulation of fibroblast growth factor receptor signaling pathway	7	2	0.0120219	LUSC
GO:0005294	MF	neutral L-amino acid secondary active transmembrane transporter activity	1	1	0.0120634	LUSC
GO:0015327	MF	cystine:glutamate antiporter activity	1	1	0.0120634	LUSC
GO:0015328	MF	cystine secondary active transmembrane transporter activity	1	1	0.0120634	LUSC
GO:1901494	BP	regulation of cysteine metabolic process	1	1	0.0120634	LUSC
GO:0005127	MF	ciliary neurotrophic factor receptor binding	8	2	0.0121073	LUSC
GO:0001173	BP	DNA-templated transcriptional start site selection	1	1	0.0121142	LUSC
GO:0001174	BP	transcriptional start site selection at RNA polymerase II promoter	1	1	0.0121142	LUSC
GO:1990114	BP	RNA polymerase II core complex assembly	1	1	0.0121142	LUSC
GO:0050353	MF	trimethyllysine dioxygenase activity	1	1	0.0122591	LUSC
GO:0016034	MF	maleylacetoacetate isomerase activity	1	1	0.012535	LUSC
GO:0052658	MF	inositol-1,4,5-trisphosphate 5-phosphatase activity	7	2	0.0126421	LUSC
GO:0048736	BP	appendage development	177	11	0.0126612	LUSC
GO:0060173	BP	limb development	177	11	0.0126612	LUSC
GO:0016174	MF	NAD(P)H oxidase H2O2-forming activity	9	2	0.0127271	LUSC
GO:0046458	BP	hexadecanal metabolic process	1	1	0.0127486	LUSC
GO:0046577	MF	long-chain-alcohol oxidase activity	1	1	0.0127486	LUSC
GO:0050061	MF	long-chain-aldehyde dehydrogenase activity	1	1	0.0127486	LUSC
GO:0052814	MF	medium-chain-aldehyde dehydrogenase activity	1	1	0.0127486	LUSC
GO:0005898	CC	interleukin-13 receptor complex	1	1	0.0128529	LUSC
GO:0061036	BP	positive regulation of cartilage development	31	4	0.0130574	LUSC
GO:0004445	MF	inositol-polyphosphate 5-phosphatase activity	7	2	0.0142268	LUSC
GO:0098815	BP	modulation of excitatory postsynaptic potential	44	5	0.0144439	LUSC
GO:0002040	BP	sprouting angiogenesis	176	8	0.0146263	LUSC
GO:0090394	BP	negative regulation of excitatory postsynaptic potential	10	2	0.0146293	LUSC
GO:1905279	BP	regulation of retrograde transport, endosome to Golgi	7	2	0.0148279	LUSC
GO:0071837	MF	HMG box domain binding	14	3	0.0148522	LUSC
GO:0034982	BP	mitochondrial protein processing	13	2	0.0153023	LUSC
GO:1903630	BP	regulation of aminoacyl-tRNA ligase activity	2	1	0.0158326	LUSC
GO:0034718	CC	SMN-Gemin2 complex	1	1	0.0158547	LUSC
GO:1903216	BP	regulation of protein processing involved in protein targeting to mitochondrion	2	1	0.0160047	LUSC
GO:1903217	BP	negative regulation of protein processing involved in protein targeting to mitochondrion	2	1	0.0160047	LUSC
GO:0004418	MF	hydroxymethylbilane synthase activity	1	1	0.0160254	LUSC
GO:0018160	BP	peptidyl-pyrromethane cofactor linkage	1	1	0.0160254	LUSC
GO:0035116	BP	embryonic hindlimb morphogenesis	28	4	0.0160791	LUSC
GO:0004496	MF	mevalonate kinase activity	1	1	0.0161914	LUSC
GO:1903201	BP	regulation of oxidative stress-induced cell death	80	5	0.0162786	LUSC
GO:1902823	BP	negative regulation of late endosome to lysosome transport	2	1	0.0170738	LUSC
GO:1903336	BP	negative regulation of vacuolar transport	2	1	0.0170738	LUSC
GO:1902883	BP	negative regulation of response to oxidative stress	28	3	0.0171377	LUSC
GO:0005171	MF	hepatocyte growth factor receptor binding	2	1	0.0178478	LUSC
GO:1902473	BP	regulation of protein localization to synapse	20	3	0.0178495	LUSC
GO:0036041	MF	long-chain fatty acid binding	15	2	0.017877	LUSC
GO:1903202	BP	negative regulation of oxidative stress-induced cell death	55	4	0.0180613	LUSC
GO:2000543	BP	positive regulation of gastrulation	6	2	0.0180645	LUSC
GO:2000553	BP	positive regulation of T-helper 2 cell cytokine production	8	2	0.0181332	LUSC
GO:0007167	BP	enzyme-linked receptor protein signaling pathway	983	34	0.0183036	LUSC
GO:0033989	MF	3alpha,7alpha,12alpha-trihydroxy-5beta-cholest-24-enoyl-CoA hydratase activity	1	1	0.0183524	LUSC
GO:0004423	MF	iduronate-2-sulfatase activity	1	1	0.0183766	LUSC
GO:0045778	BP	positive regulation of ossification	54	5	0.0184312	LUSC
GO:0140323	MF	solute:anion antiporter activity	30	3	0.018451	LUSC
GO:0048731	BP	system development	4335	115	0.0189824	LUSC
GO:0052743	MF	inositol tetrakisphosphate phosphatase activity	8	2	0.0192281	LUSC
GO:0099072	BP	regulation of postsynaptic membrane neurotransmitter receptor levels	63	5	0.0194026	LUSC
GO:0009887	BP	animal organ morphogenesis	1046	38	0.0196019	LUSC
GO:0008543	BP	fibroblast growth factor receptor signaling pathway	84	6	0.0199506	LUSC
GO:0002625	BP	regulation of T cell antigen processing and presentation	2	1	0.0200812	LUSC
GO:0044537	BP	regulation of circulating fibrinogen levels	4	1	0.0204026	LUSC
GO:0061754	BP	negative regulation of circulating fibrinogen levels	4	1	0.0204026	LUSC
GO:0035115	BP	embryonic forelimb morphogenesis	32	4	0.02068	LUSC
GO:0032231	BP	regulation of actin filament bundle assembly	107	7	0.0208009	LUSC
GO:0072750	BP	cellular response to leptomycin B	1	1	0.0209166	LUSC
GO:1901344	BP	response to leptomycin B	1	1	0.0209166	LUSC
GO:1901707	MF	leptomycin B binding	1	1	0.0209166	LUSC
GO:0007084	BP	mitotic nuclear membrane reassembly	9	2	0.0209988	LUSC
GO:0101024	BP	mitotic nuclear membrane organization	9	2	0.0209988	LUSC
GO:0034021	BP	response to silicon dioxide	3	1	0.0210088	LUSC
GO:0042471	BP	ear morphogenesis	123	8	0.0211127	LUSC
GO:0033306	BP	phytol metabolic process	2	1	0.0212017	LUSC
GO:1903173	BP	fatty alcohol metabolic process	2	1	0.0212017	LUSC
GO:0015871	BP	choline transport	9	2	0.0213453	LUSC
GO:0032060	BP	bleb assembly	11	2	0.0217385	LUSC
GO:0035745	BP	T-helper 2 cell cytokine production	10	2	0.0219989	LUSC
GO:2000551	BP	regulation of T-helper 2 cell cytokine production	10	2	0.0219989	LUSC
GO:0090537	CC	CERF complex	2	1	0.0220045	LUSC
GO:0070170	BP	regulation of tooth mineralization	12	2	0.0223214	LUSC
GO:0050664	MF	oxidoreductase activity, acting on NAD(P)H, oxygen as acceptor	15	2	0.0224371	LUSC
GO:0046637	BP	regulation of alpha-beta T cell differentiation	73	5	0.0226159	LUSC
GO:1902991	BP	regulation of amyloid precursor protein catabolic process	53	4	0.0228052	LUSC
GO:0070488	BP	neutrophil aggregation	2	1	0.0229252	LUSC
GO:0120116	BP	glucagon processing	1	1	0.0229356	LUSC
GO:0046634	BP	regulation of alpha-beta T cell activation	110	6	0.0231577	LUSC
GO:0019402	BP	galactitol metabolic process	1	1	0.0231833	LUSC
GO:0061623	BP	glycolytic process from galactose	1	1	0.0231833	LUSC
GO:0050680	BP	negative regulation of epithelial cell proliferation	170	8	0.0234845	LUSC
GO:0101023	BP	vascular endothelial cell proliferation	51	3	0.0241332	LUSC
GO:1905562	BP	regulation of vascular endothelial cell proliferation	51	3	0.0241332	LUSC
GO:0048311	BP	mitochondrion distribution	14	2	0.0246099	LUSC
GO:1902993	BP	positive regulation of amyloid precursor protein catabolic process	25	3	0.0247611	LUSC
GO:0018026	BP	peptidyl-lysine monomethylation	12	2	0.0249965	LUSC
GO:2001151	BP	regulation of renal water transport	1	1	0.0253022	LUSC
GO:2001153	BP	positive regulation of renal water transport	1	1	0.0253022	LUSC
GO:0004706	MF	JUN kinase kinase kinase activity	11	2	0.0253556	LUSC
GO:0031335	BP	regulation of sulfur amino acid metabolic process	2	1	0.025478	LUSC
GO:0019853	BP	L-ascorbic acid biosynthetic process	2	1	0.0256977	LUSC
GO:1901336	BP	lactone biosynthetic process	2	1	0.0256977	LUSC
GO:0045509	MF	interleukin-27 receptor activity	2	1	0.0257334	LUSC
GO:0044754	CC	autolysosome	12	2	0.0260464	LUSC
GO:0018027	BP	peptidyl-lysine dimethylation	26	3	0.0261027	LUSC
GO:1903231	MF	mRNA base-pairing post-transcriptional repressor activity	218	4	0.0261278	LUSC
GO:1902822	BP	regulation of late endosome to lysosome transport	3	1	0.0266003	LUSC
GO:1903335	BP	regulation of vacuolar transport	3	1	0.0266003	LUSC
GO:0043542	BP	endothelial cell migration	271	11	0.0266585	LUSC
GO:1903588	BP	negative regulation of blood vessel endothelial cell proliferation involved in sprouting angiogenesis	22	2	0.0268098	LUSC
GO:0048840	BP	otolith development	10	2	0.0268722	LUSC
GO:0080030	MF	methyl indole-3-acetate esterase activity	4	1	0.0273625	LUSC
GO:2001141	BP	regulation of RNA biosynthetic process	3265	83	0.0277832	LUSC
GO:0036111	BP	very long-chain fatty-acyl-CoA metabolic process	2	1	0.0278181	LUSC
GO:0035107	BP	appendage morphogenesis	142	9	0.0279572	LUSC
GO:0035108	BP	limb morphogenesis	142	9	0.0279572	LUSC
GO:0032332	BP	positive regulation of chondrocyte differentiation	20	3	0.0283164	LUSC
GO:0051017	BP	actin filament bundle assembly	159	9	0.0284597	LUSC
GO:0090160	BP	Golgi to lysosome transport	11	2	0.0286172	LUSC
GO:0099523	CC	presynaptic cytosol	9	2	0.029172	LUSC
GO:0046638	BP	positive regulation of alpha-beta T cell differentiation	53	4	0.0294087	LUSC
GO:0072563	CC	endothelial microparticle	3	1	0.0298046	LUSC
GO:0003354	BP	negative regulation of cilium movement	4	1	0.0298292	LUSC
GO:1901318	BP	negative regulation of flagellated sperm motility	4	1	0.0298292	LUSC
GO:1902020	BP	negative regulation of cilium-dependent cell motility	4	1	0.0298292	LUSC
GO:0006575	BP	cellular modified amino acid metabolic process	163	7	0.0300068	LUSC
GO:1900272	BP	negative regulation of long-term synaptic potentiation	12	2	0.0302899	LUSC
GO:0016899	MF	oxidoreductase activity, acting on the CH-OH group of donors, oxygen as acceptor	4	1	0.0303142	LUSC
GO:0072583	BP	clathrin-dependent endocytosis	47	4	0.0305985	LUSC
GO:0035606	BP	peptidyl-cysteine S-trans-nitrosylation	2	1	0.0306455	LUSC
GO:0005247	MF	voltage-gated chloride channel activity	11	2	0.0307885	LUSC
GO:0002696	BP	positive regulation of leukocyte activation	365	13	0.031031	LUSC
GO:0007275	BP	multicellular organism development	4791	123	0.03117	LUSC
GO:0032754	BP	positive regulation of interleukin-5 production	10	2	0.0313731	LUSC
GO:0042147	BP	retrograde transport, endosome to Golgi	86	5	0.0313941	LUSC
GO:0052642	MF	lysophosphatidic acid phosphatase activity	4	1	0.0314932	LUSC
GO:1900407	BP	regulation of cellular response to oxidative stress	94	5	0.0320933	LUSC
GO:0030526	CC	granulocyte macrophage colony-stimulating factor receptor complex	3	1	0.0321433	LUSC
GO:0038157	BP	granulocyte-macrophage colony-stimulating factor signaling pathway	3	1	0.0321433	LUSC
GO:0061572	BP	actin filament bundle organization	162	9	0.032403	LUSC
GO:0043401	BP	steroid hormone mediated signaling pathway	132	7	0.0324189	LUSC
GO:0035137	BP	hindlimb morphogenesis	35	4	0.0324318	LUSC
GO:0005911	CC	cell-cell junction	495	19	0.0327328	LUSC
GO:0042101	CC	T cell receptor complex	13	2	0.03288	LUSC
GO:0031424	BP	keratinization	75	3	0.0329749	LUSC
GO:0005504	MF	fatty acid binding	46	3	0.0330743	LUSC
GO:0002041	BP	intussusceptive angiogenesis	1	1	0.033107	LUSC
GO:0001228	MF	DNA-binding transcription activator activity, RNA polymerase II-specific	451	18	0.0332773	LUSC
GO:0005008	MF	hepatocyte growth factor receptor activity	1	1	0.0340143	LUSC
GO:0004830	MF	tryptophan-tRNA ligase activity	2	1	0.0342038	LUSC
GO:0006436	BP	tryptophanyl-tRNA aminoacylation	2	1	0.0342038	LUSC
GO:2000027	BP	regulation of animal organ morphogenesis	129	8	0.0344242	LUSC
GO:0016262	MF	protein N-acetylglucosaminyltransferase activity	3	1	0.0344531	LUSC
GO:0002456	BP	T cell mediated immunity	104	5	0.0346358	LUSC
GO:0047374	MF	methylumbelliferyl-acetate deacetylase activity	3	1	0.0348488	LUSC
GO:0051216	BP	cartilage development	196	10	0.0348498	LUSC
GO:0021570	BP	rhombomere 4 development	2	1	0.034874	LUSC
GO:0001216	MF	DNA-binding transcription activator activity	455	18	0.0353863	LUSC
GO:0006355	BP	regulation of DNA-templated transcription	3254	82	0.0354581	LUSC
GO:0010594	BP	regulation of endothelial cell migration	221	9	0.03568	LUSC
GO:1903506	BP	regulation of nucleic acid-templated transcription	3256	82	0.0357108	LUSC
GO:0060079	BP	excitatory postsynaptic potential	123	7	0.0358063	LUSC
GO:0035743	BP	CD4-positive, alpha-beta T cell cytokine production	16	2	0.0359007	LUSC
GO:0035278	BP	miRNA-mediated gene silencing by inhibition of translation	83	3	0.0361414	LUSC
GO:0060668	BP	regulation of branching involved in salivary gland morphogenesis by extracellular matrix-epithelial cell signaling	1	1	0.0362141	LUSC
GO:0006911	BP	phagocytosis, engulfment	53	4	0.0362588	LUSC
GO:0070486	BP	leukocyte aggregation	13	2	0.0362895	LUSC
GO:0006059	BP	hexitol metabolic process	2	1	0.0364749	LUSC
GO:0004024	MF	alcohol dehydrogenase activity, zinc-dependent	7	1	0.0366017	LUSC
GO:0097045	BP	phosphatidylserine exposure on blood platelet	1	1	0.0371791	LUSC
GO:0048561	BP	establishment of animal organ orientation	1	1	0.0376002	LUSC
GO:0030501	BP	positive regulation of bone mineralization	45	4	0.0377107	LUSC
GO:0015207	MF	adenine transmembrane transporter activity	3	1	0.0378307	LUSC
GO:0048012	BP	hepatocyte growth factor receptor signaling pathway	13	2	0.0380111	LUSC
GO:0061975	BP	articular cartilage development	3	1	0.0382372	LUSC
GO:0016508	MF	long-chain-enoyl-CoA hydratase activity	3	1	0.0382656	LUSC
GO:0032774	BP	RNA biosynthetic process	3383	84	0.0390238	LUSC
GO:0061622	BP	glycolytic process through glucose-1-phosphate	2	1	0.0390966	LUSC
GO:0051352	BP	negative regulation of ligase activity	2	1	0.0393036	LUSC
GO:0042987	BP	amyloid precursor protein catabolic process	66	4	0.0403455	LUSC
GO:0061035	BP	regulation of cartilage development	71	5	0.0408621	LUSC
GO:0001775	BP	cell activation	1040	29	0.0410146	LUSC
GO:0005900	CC	oncostatin-M receptor complex	2	1	0.041015	LUSC
GO:0046030	MF	inositol trisphosphate phosphatase activity	12	2	0.0411803	LUSC
GO:0036473	BP	cell death in response to oxidative stress	100	5	0.0415381	LUSC
GO:0048856	BP	anatomical structure development	5746	140	0.0416728	LUSC
GO:1904217	BP	regulation of CDP-diacylglycerol-serine O-phosphatidyltransferase activity	2	1	0.0419146	LUSC
GO:1904219	BP	positive regulation of CDP-diacylglycerol-serine O-phosphatidyltransferase activity	2	1	0.0419146	LUSC
GO:1904222	BP	positive regulation of serine C-palmitoyltransferase activity	2	1	0.0419146	LUSC
GO:0010632	BP	regulation of epithelial cell migration	283	11	0.0420401	LUSC
GO:0009790	BP	embryo development	1117	37	0.0422908	LUSC
GO:0008308	MF	voltage-gated anion channel activity	15	2	0.0423981	LUSC
GO:0052595	MF	aliphatic amine oxidase activity	4	1	0.0425721	LUSC
GO:0052596	MF	phenethylamine:oxygen oxidoreductase (deaminating) activity	4	1	0.0425721	LUSC
GO:0099565	BP	chemical synaptic transmission, postsynaptic	129	7	0.0426767	LUSC
GO:0009110	BP	vitamin biosynthetic process	20	2	0.0429286	LUSC
GO:0005767	CC	secondary lysosome	17	2	0.0430243	LUSC
GO:0010556	BP	regulation of macromolecule biosynthetic process	3789	91	0.0432046	LUSC
GO:0010631	BP	epithelial cell migration	356	13	0.0432315	LUSC
GO:0030278	BP	regulation of ossification	119	7	0.0433252	LUSC
GO:0007266	BP	Rho protein signal transduction	137	7	0.0435147	LUSC
GO:0035418	BP	protein localization to synapse	69	5	0.0440919	LUSC
GO:0051764	BP	actin crosslink formation	14	2	0.04456	LUSC
GO:2000324	BP	positive regulation of glucocorticoid receptor signaling pathway	1	1	0.0445863	LUSC
GO:0043914	MF	NADPH:sulfur oxidoreductase activity	1	1	0.0447704	LUSC
GO:0008444	MF	CDP-diacylglycerol-glycerol-3-phosphate 3-phosphatidyltransferase activity	1	1	0.0448316	LUSC
GO:0110032	BP	positive regulation of G2/MI transition of meiotic cell cycle	3	1	0.0448771	LUSC
GO:0070084	BP	protein initiator methionine removal	3	1	0.0448817	LUSC
GO:0045329	BP	carnitine biosynthetic process	4	1	0.0449325	LUSC
GO:0035662	MF	Toll-like receptor 4 binding	4	1	0.0450291	LUSC
GO:0042398	BP	cellular modified amino acid biosynthetic process	43	3	0.0452526	LUSC
GO:2000211	BP	regulation of glutamate metabolic process	3	1	0.0452911	LUSC
GO:0002709	BP	regulation of T cell mediated immunity	84	4	0.0454518	LUSC
GO:0008459	MF	chondroitin 6-sulfotransferase activity	2	1	0.0454867	LUSC
GO:0090132	BP	epithelium migration	358	13	0.045653	LUSC
GO:0030280	MF	structural constituent of skin epidermis	36	2	0.0458611	LUSC
GO:0002830	BP	positive regulation of type 2 immune response	17	2	0.0459591	LUSC
GO:0051497	BP	negative regulation of stress fiber assembly	32	3	0.046023	LUSC
GO:0008478	MF	pyridoxal kinase activity	1	1	0.0460568	LUSC
GO:0009443	BP	pyridoxal 5'-phosphate salvage	1	1	0.0460568	LUSC
GO:0006311	BP	meiotic gene conversion	3	1	0.0460665	LUSC
GO:0002819	BP	regulation of adaptive immune response	189	7	0.0462297	LUSC
GO:1902882	BP	regulation of response to oxidative stress	103	5	0.0462702	LUSC
GO:0097545	CC	axonemal outer doublet	3	1	0.046327	LUSC
GO:0140021	BP	mitochondrial ADP transmembrane transport	4	1	0.0463395	LUSC
GO:1990544	BP	mitochondrial ATP transmembrane transport	4	1	0.0463395	LUSC
GO:0005534	MF	galactose binding	4	1	0.046433	LUSC
GO:1903895	BP	negative regulation of IRE1-mediated unfolded protein response	5	1	0.0465925	LUSC
GO:2000690	BP	regulation of cardiac muscle cell myoblast differentiation	1	1	0.0471434	LUSC
GO:2000691	BP	negative regulation of cardiac muscle cell myoblast differentiation	1	1	0.0471434	LUSC
GO:1905000	BP	regulation of membrane repolarization during atrial cardiac muscle cell action potential	2	1	0.0475559	LUSC
GO:0098802	CC	plasma membrane signaling receptor complex	182	8	0.0476312	LUSC
GO:1904055	BP	negative regulation of cholangiocyte proliferation	1	1	0.0476647	LUSC
GO:0050785	MF	advanced glycation end-product receptor activity	1	1	0.0477023	LUSC
GO:1904470	BP	regulation of endothelin production	1	1	0.0477023	LUSC
GO:1904472	BP	positive regulation of endothelin production	1	1	0.0477023	LUSC
GO:1990775	BP	endothelin production	1	1	0.0477023	LUSC
GO:0006351	BP	DNA-templated transcription	3364	83	0.0477348	LUSC
GO:0009966	BP	regulation of signal transduction	2957	77	0.0478261	LUSC
GO:0097659	BP	nucleic acid-templated transcription	3366	83	0.0479369	LUSC
GO:0110030	BP	regulation of G2/MI transition of meiotic cell cycle	4	1	0.0481053	LUSC
GO:0005471	MF	ATP:ADP antiporter activity	4	1	0.0483725	LUSC
GO:0046632	BP	alpha-beta T cell differentiation	117	6	0.0484204	LUSC
GO:0036076	BP	ligamentous ossification	1	1	0.0488679	LUSC
GO:0036250	BP	peroxisome transport along microtubule	1	1	0.0488842	LUSC
GO:0044721	BP	protein import into peroxisome matrix, substrate release	1	1	0.0488842	LUSC
GO:0071709	BP	membrane assembly	57	4	0.0489007	LUSC
GO:0016230	MF	sphingomyelin phosphodiesterase activator activity	2	1	0.0489876	LUSC
GO:0048560	BP	establishment of anatomical structure orientation	2	1	0.0491162	LUSC
GO:1903786	BP	regulation of glutathione biosynthetic process	2	1	0.0491846	LUSC
GO:0008333	BP	endosome to lysosome transport	70	4	0.0492501	LUSC
GO:0090130	BP	tissue migration	363	13	0.0497391	LUSC
GO:0097621	MF	monoamine oxidase activity	3	1	0.0499959	LUSC

## Sheet: COAD
ID	ONTOLOGY	TERM	N	DE	P.DE	Cancer
GO:0051345	BP	positive regulation of hydrolase activity	564	31	0.000572011	COAD
GO:0019614	BP	catechol-containing compound catabolic process	7	3	0.00076769	COAD
GO:0042420	BP	dopamine catabolic process	7	3	0.00076769	COAD
GO:0042424	BP	catecholamine catabolic process	7	3	0.00076769	COAD
GO:0043296	CC	apical junction complex	147	13	0.000790878	COAD
GO:0043547	BP	positive regulation of GTPase activity	260	19	0.000886939	COAD
GO:0016638	MF	oxidoreductase activity, acting on the CH-NH2 group of donors	20	4	0.000923725	COAD
GO:0072073	BP	kidney epithelium development	145	14	0.00123055	COAD
GO:0052595	MF	aliphatic amine oxidase activity	4	2	0.0014456	COAD
GO:0052596	MF	phenethylamine:oxygen oxidoreductase (deaminating) activity	4	2	0.0014456	COAD
GO:0001655	BP	urogenital system development	357	24	0.00145801	COAD
GO:0005923	CC	bicellular tight junction	124	11	0.00146942	COAD
GO:0097621	MF	monoamine oxidase activity	3	2	0.00185659	COAD
GO:0019336	BP	phenol-containing compound catabolic process	10	3	0.00209334	COAD
GO:0070160	CC	tight junction	129	11	0.00213286	COAD
GO:0071800	BP	podosome assembly	19	4	0.00235208	COAD
GO:0072673	BP	lamellipodium morphogenesis	18	4	0.00272298	COAD
GO:0072156	BP	distal tubule morphogenesis	3	2	0.00288788	COAD
GO:0016670	MF	oxidoreductase activity, acting on a sulfur group of donors, oxygen as acceptor	11	3	0.00330062	COAD
GO:0090257	BP	regulation of muscle system process	253	16	0.00351892	COAD
GO:0072009	BP	nephron epithelium development	115	11	0.00362683	COAD
GO:0008131	MF	primary amine oxidase activity	6	2	0.00363371	COAD
GO:0060768	BP	regulation of epithelial cell proliferation involved in prostate gland development	10	3	0.00364119	COAD
GO:0072001	BP	renal system development	315	21	0.00371569	COAD
GO:0072006	BP	nephron development	151	13	0.00390325	COAD
GO:0043370	BP	regulation of CD4-positive, alpha-beta T cell differentiation	56	6	0.00390857	COAD
GO:0061326	BP	renal tubule development	98	10	0.00407006	COAD
GO:0016971	MF	flavin-linked sulfhydryl oxidase activity	3	2	0.00433368	COAD
GO:0060767	BP	epithelial cell proliferation involved in prostate gland development	11	3	0.00456144	COAD
GO:0097602	MF	cullin family protein binding	26	4	0.00456846	COAD
GO:0045622	BP	regulation of T-helper cell differentiation	43	5	0.00488634	COAD
GO:0002376	BP	immune system process	2451	82	0.00520021	COAD
GO:0001822	BP	kidney development	306	20	0.00529059	COAD
GO:0060562	BP	epithelial tube morphogenesis	333	22	0.00552558	COAD
GO:1901616	BP	organic hydroxy compound catabolic process	73	6	0.00564293	COAD
GO:2000319	BP	regulation of T-helper 17 cell differentiation	21	3	0.00606924	COAD
GO:0045321	BP	leukocyte activation	896	37	0.00614095	COAD
GO:0005911	CC	cell-cell junction	495	27	0.00625851	COAD
GO:0042402	BP	cellular biogenic amine catabolic process	16	3	0.00648031	COAD
GO:0007162	BP	negative regulation of cell adhesion	299	17	0.00711692	COAD
GO:0016641	MF	oxidoreductase activity, acting on the CH-NH2 group of donors, oxygen as acceptor	16	3	0.00711718	COAD
GO:0005096	MF	GTPase activator activity	248	16	0.00712704	COAD
GO:0048870	BP	cell motility	1729	68	0.00740641	COAD
GO:0016477	BP	cell migration	1538	63	0.00754119	COAD
GO:0038063	BP	collagen-activated tyrosine kinase receptor signaling pathway	12	3	0.00757267	COAD
GO:0001891	CC	phagocytic cup	28	4	0.00759961	COAD
GO:2000392	BP	regulation of lamellipodium morphogenesis	11	3	0.0077866	COAD
GO:1905034	BP	regulation of antifungal innate immune response	5	2	0.00808061	COAD
GO:1904738	BP	vascular associated smooth muscle cell migration	47	5	0.00810857	COAD
GO:0038180	BP	nerve growth factor signaling pathway	12	3	0.00831049	COAD
GO:0032925	BP	regulation of activin receptor signaling pathway	25	4	0.00833147	COAD
GO:0030850	BP	prostate gland development	51	6	0.00847349	COAD
GO:0051117	MF	ATPase binding	85	7	0.00848896	COAD
GO:0140157	BP	ammonium import across plasma membrane	3	2	0.00860248	COAD
GO:0043372	BP	positive regulation of CD4-positive, alpha-beta T cell differentiation	35	4	0.00876653	COAD
GO:0120325	MF	NuRD complex binding	4	2	0.00877665	COAD
GO:1900037	BP	regulation of cellular response to hypoxia	17	3	0.00879783	COAD
GO:1900150	BP	regulation of defense response to fungus	6	2	0.00930952	COAD
GO:0032729	BP	positive regulation of interferon-gamma production	76	6	0.00938426	COAD
GO:0072017	BP	distal tubule development	12	3	0.00938511	COAD
GO:0045936	BP	negative regulation of phosphate metabolic process	430	22	0.00957836	COAD
GO:0010563	BP	negative regulation of phosphorus metabolic process	431	22	0.00975971	COAD
GO:0043198	CC	dendritic shaft	38	5	0.0100038	COAD
GO:0072080	BP	nephron tubule development	95	9	0.010015	COAD
GO:0035033	MF	histone deacetylase regulator activity	5	2	0.010035	COAD
GO:0009310	BP	amine catabolic process	18	3	0.0101417	COAD
GO:0001952	BP	regulation of cell-matrix adhesion	125	10	0.0101972	COAD
GO:0003012	BP	muscle system process	450	23	0.010339	COAD
GO:0045623	BP	negative regulation of T-helper cell differentiation	18	3	0.0104559	COAD
GO:0050866	BP	negative regulation of cell activation	215	12	0.0107781	COAD
GO:0002520	BP	immune system development	998	41	0.010905	COAD
GO:0003912	MF	DNA nucleotidylexotransferase activity	1	1	0.011518	COAD
GO:0061333	BP	renal tubule morphogenesis	79	8	0.0115854	COAD
GO:0061430	BP	bone trabecula morphogenesis	13	3	0.0116822	COAD
GO:0002355	BP	detection of tumor cell	1	1	0.0119519	COAD
GO:0031092	CC	platelet alpha granule membrane	17	3	0.0122443	COAD
GO:0015166	MF	polyol transmembrane transporter activity	11	2	0.0124567	COAD
GO:0048534	BP	hematopoietic or lymphoid organ development	941	39	0.012652	COAD
GO:0090630	BP	activation of GTPase activity	105	9	0.0127213	COAD
GO:1900745	BP	positive regulation of p38MAPK cascade	30	4	0.0128608	COAD
GO:0004607	MF	phosphatidylcholine-sterol O-acyltransferase activity	1	1	0.0128873	COAD
GO:0035238	BP	vitamin A biosynthetic process	1	1	0.0129754	COAD
GO:1901810	BP	beta-carotene metabolic process	1	1	0.0129754	COAD
GO:0060048	BP	cardiac muscle contraction	139	10	0.0130089	COAD
GO:0003299	BP	muscle hypertrophy in response to stress	31	4	0.0131378	COAD
GO:0014887	BP	cardiac muscle adaptation	31	4	0.0131378	COAD
GO:0014898	BP	cardiac muscle hypertrophy in response to stress	31	4	0.0131378	COAD
GO:0043087	BP	regulation of GTPase activity	350	20	0.0131504	COAD
GO:0018549	MF	methanethiol oxidase activity	1	1	0.0132995	COAD
GO:0009957	BP	epidermal cell fate specification	4	2	0.0133098	COAD
GO:0097198	BP	histone H3-K36 trimethylation	6	2	0.01332	COAD
GO:1990172	BP	G protein-coupled receptor catabolic process	1	1	0.0133596	COAD
GO:0032609	BP	interferon-gamma production	114	7	0.0134226	COAD
GO:0032649	BP	regulation of interferon-gamma production	114	7	0.0134226	COAD
GO:0010452	BP	histone H3-K36 methylation	14	3	0.0134659	COAD
GO:0003756	MF	protein disulfide isomerase activity	18	3	0.0136664	COAD
GO:0016864	MF	intramolecular oxidoreductase activity, transposing S-S bonds	18	3	0.0136664	COAD
GO:0033689	BP	negative regulation of osteoblast proliferation	15	3	0.0141339	COAD
GO:0004733	MF	pyridoxamine-phosphate oxidase activity	1	1	0.0142384	COAD
GO:0022408	BP	negative regulation of cell-cell adhesion	194	11	0.0144487	COAD
GO:0043974	BP	histone H3-K27 acetylation	6	2	0.0147636	COAD
GO:1901674	BP	regulation of histone H3-K27 acetylation	6	2	0.0147636	COAD
GO:1905371	BP	ceramide phosphoethanolamine metabolic process	1	1	0.0147905	COAD
GO:1905373	BP	ceramide phosphoethanolamine biosynthetic process	1	1	0.0147905	COAD
GO:0010810	BP	regulation of cell-substrate adhesion	219	14	0.0149452	COAD
GO:0030155	BP	regulation of cell adhesion	783	35	0.0149591	COAD
GO:0045624	BP	positive regulation of T-helper cell differentiation	23	3	0.0151381	COAD
GO:0006449	BP	regulation of translational termination	10	2	0.0152057	COAD
GO:0005129	MF	granulocyte macrophage colony-stimulating factor receptor binding	1	1	0.015255	COAD
GO:0005587	CC	collagen type IV trimer	7	2	0.0153129	COAD
GO:2000514	BP	regulation of CD4-positive, alpha-beta T cell activation	75	6	0.0154585	COAD
GO:0001775	BP	cell activation	1040	40	0.0156249	COAD
GO:0047391	MF	alkylglycerophosphoethanolamine phosphodiesterase activity	1	1	0.0158937	COAD
GO:0102390	MF	mycophenolic acid acyl-glucuronide esterase activity	1	1	0.0159986	COAD
GO:0002336	BP	B-1 B cell lineage commitment	1	1	0.0160538	COAD
GO:2000509	BP	negative regulation of dendritic cell chemotaxis	1	1	0.0160538	COAD
GO:0017022	MF	myosin binding	74	6	0.0160553	COAD
GO:0033137	BP	negative regulation of peptidyl-serine phosphorylation	30	4	0.0162893	COAD
GO:1903769	BP	negative regulation of cell proliferation in bone marrow	2	1	0.0165099	COAD
GO:0038065	BP	collagen-activated signaling pathway	17	3	0.01657	COAD
GO:0004503	MF	tyrosinase activity	2	1	0.0166318	COAD
GO:0030368	MF	interleukin-17 receptor activity	8	2	0.0167575	COAD
GO:0035239	BP	tube morphogenesis	928	41	0.0168352	COAD
GO:0043244	BP	regulation of protein-containing complex disassembly	123	9	0.0169158	COAD
GO:0006884	BP	cell volume homeostasis	32	4	0.0171989	COAD
GO:0006955	BP	immune response	1542	49	0.0172666	COAD
GO:0016972	MF	thiol oxidase activity	6	2	0.0173333	COAD
GO:0072274	BP	metanephric glomerular basement membrane development	1	1	0.0175453	COAD
GO:0006583	BP	melanin biosynthetic process from tyrosine	2	1	0.0177364	COAD
GO:0045127	MF	N-acetylglucosamine kinase activity	1	1	0.0178034	COAD
GO:0048525	BP	negative regulation of viral process	88	6	0.0178951	COAD
GO:1903900	BP	regulation of viral life cycle	138	8	0.0178958	COAD
GO:0014888	BP	striated muscle adaptation	55	5	0.0181296	COAD
GO:0052659	MF	inositol-1,3,4,5-tetrakisphosphate 5-phosphatase activity	6	2	0.0181434	COAD
GO:0043533	MF	inositol 1,3,4,5 tetrakisphosphate binding	5	2	0.0187765	COAD
GO:0098642	CC	network-forming collagen trimer	9	2	0.0188097	COAD
GO:0098645	CC	collagen network	9	2	0.0188097	COAD
GO:0030595	BP	leukocyte chemotaxis	225	11	0.0188955	COAD
GO:2000508	BP	regulation of dendritic cell chemotaxis	11	2	0.0190317	COAD
GO:0045819	BP	positive regulation of glycogen catabolic process	1	1	0.0190393	COAD
GO:0002695	BP	negative regulation of leukocyte activation	192	10	0.0191038	COAD
GO:0010509	BP	polyamine homeostasis	1	1	0.0191412	COAD
GO:0071976	BP	cell gliding	1	1	0.0192088	COAD
GO:0120117	BP	T cell meandering migration	1	1	0.0192088	COAD
GO:0071545	BP	inositol phosphate catabolic process	19	3	0.0193606	COAD
GO:0031672	CC	A band	36	4	0.0194063	COAD
GO:0097240	BP	chromosome attachment to the nuclear envelope	6	2	0.0194783	COAD
GO:0150033	BP	negative regulation of protein localization to lysosome	1	1	0.0195414	COAD
GO:0043500	BP	muscle adaptation	122	8	0.019646	COAD
GO:0046649	BP	lymphocyte activation	736	30	0.019868	COAD
GO:1902004	BP	positive regulation of amyloid-beta formation	20	3	0.0199005	COAD
GO:0071674	BP	mononuclear cell migration	190	10	0.0199373	COAD
GO:0031589	BP	cell-substrate adhesion	363	20	0.0201313	COAD
GO:2000320	BP	negative regulation of T-helper 17 cell differentiation	11	2	0.0203918	COAD
GO:0014066	BP	regulation of phosphatidylinositol 3-kinase signaling	107	8	0.0204999	COAD
GO:0003092	BP	renal water retention	1	1	0.0205615	COAD
GO:0050865	BP	regulation of cell activation	636	26	0.0207286	COAD
GO:0051125	BP	regulation of actin nucleation	37	4	0.0207289	COAD
GO:0030097	BP	hemopoiesis	899	36	0.0210648	COAD
GO:0047016	MF	cholest-5-ene-3-beta,7-alpha-diol 3-beta-dehydrogenase activity	1	1	0.0212745	COAD
GO:0048732	BP	gland development	436	23	0.0213206	COAD
GO:0060326	BP	cell chemotaxis	296	14	0.0214477	COAD
GO:0052658	MF	inositol-1,4,5-trisphosphate 5-phosphatase activity	7	2	0.0215796	COAD
GO:0046637	BP	regulation of alpha-beta T cell differentiation	73	6	0.0215802	COAD
GO:0140454	BP	protein aggregate center assembly	1	1	0.0217655	COAD
GO:0080170	BP	hydrogen peroxide transmembrane transport	1	1	0.0218268	COAD
GO:0098651	CC	basement membrane collagen trimer	9	2	0.0219247	COAD
GO:0051651	BP	maintenance of location in cell	222	12	0.0219786	COAD
GO:0003944	MF	N-acetylglucosamine-1-phosphodiester alpha-N-acetylglucosaminidase activity	1	1	0.0221129	COAD
GO:0004757	MF	sepiapterin reductase activity	1	1	0.0224638	COAD
GO:0048017	BP	inositol lipid-mediated signaling	175	11	0.0227448	COAD
GO:0004445	MF	inositol-polyphosphate 5-phosphatase activity	7	2	0.0229223	COAD
GO:0005366	MF	myo-inositol:proton symporter activity	1	1	0.0231541	COAD
GO:0110023	BP	negative regulation of cardiac muscle myoblast proliferation	3	1	0.0231978	COAD
GO:0051235	BP	maintenance of location	335	16	0.0234902	COAD
GO:0008015	BP	blood circulation	518	24	0.0235925	COAD
GO:0008614	BP	pyridoxine metabolic process	2	1	0.0236944	COAD
GO:0008615	BP	pyridoxine biosynthetic process	2	1	0.0236944	COAD
GO:2000317	BP	negative regulation of T-helper 17 type immune response	12	2	0.0237376	COAD
GO:0003300	BP	cardiac muscle hypertrophy	99	7	0.0237548	COAD
GO:0055075	BP	potassium ion homeostasis	35	4	0.0239227	COAD
GO:0031690	MF	adrenergic receptor binding	19	3	0.0239937	COAD
GO:2000516	BP	positive regulation of CD4-positive, alpha-beta T cell activation	43	4	0.0240579	COAD
GO:0072078	BP	nephron tubule morphogenesis	75	7	0.024878	COAD
GO:2000316	BP	regulation of T-helper 17 type immune response	30	3	0.0252023	COAD
GO:0014044	BP	Schwann cell development	32	4	0.025215	COAD
GO:0021957	BP	corticospinal tract morphogenesis	7	2	0.0254187	COAD
GO:0043371	BP	negative regulation of CD4-positive, alpha-beta T cell differentiation	22	3	0.0254518	COAD
GO:0072538	BP	T-helper 17 type immune response	43	4	0.0254626	COAD
GO:0071493	BP	cellular response to UV-B	8	2	0.0254714	COAD
GO:1904753	BP	negative regulation of vascular associated smooth muscle cell migration	25	3	0.0255224	COAD
GO:0046627	BP	negative regulation of insulin receptor signaling pathway	39	4	0.025928	COAD
GO:0043276	BP	anoikis	35	4	0.0259738	COAD
GO:0045237	MF	CXCR1 chemokine receptor binding	1	1	0.0264682	COAD
GO:0051041	BP	positive regulation of calcium-independent cell-cell adhesion	1	1	0.0264682	COAD
GO:1900450	BP	negative regulation of glutamate receptor signaling pathway	1	1	0.0264682	COAD
GO:0030325	BP	adrenal gland development	27	4	0.0265519	COAD
GO:0120186	BP	negative regulation of protein localization to chromatin	1	1	0.0265872	COAD
GO:0060047	BP	heart contraction	247	14	0.0265878	COAD
GO:0038066	BP	p38MAPK cascade	56	5	0.0267421	COAD
GO:0014897	BP	striated muscle hypertrophy	102	7	0.0268823	COAD
GO:0047800	MF	cysteamine dioxygenase activity	1	1	0.0269267	COAD
GO:0072088	BP	nephron epithelium morphogenesis	77	7	0.0270127	COAD
GO:1905634	BP	regulation of protein localization to chromatin	11	2	0.0270238	COAD
GO:0006942	BP	regulation of striated muscle contraction	95	7	0.0272444	COAD
GO:0003834	MF	beta-carotene 15,15'-dioxygenase activity	2	1	0.0273477	COAD
GO:0010436	MF	carotenoid dioxygenase activity	2	1	0.0273477	COAD
GO:0016119	BP	carotene metabolic process	2	1	0.0273477	COAD
GO:0016121	BP	carotene catabolic process	2	1	0.0273477	COAD
GO:0046247	BP	terpene catabolic process	2	1	0.0273477	COAD
GO:0015194	MF	L-serine transmembrane transporter activity	9	2	0.0273549	COAD
GO:0015825	BP	L-serine transport	9	2	0.0273549	COAD
GO:1900543	BP	negative regulation of purine nucleotide metabolic process	23	3	0.0274547	COAD
GO:0045668	BP	negative regulation of osteoblast differentiation	54	5	0.0275257	COAD
GO:0003013	BP	circulatory system process	603	27	0.0280368	COAD
GO:0031717	MF	cannabinoid receptor binding	1	1	0.028202	COAD
GO:0031718	MF	type 1 cannabinoid receptor binding	1	1	0.028202	COAD
GO:0090075	BP	relaxation of muscle	34	4	0.0282683	COAD
GO:0030173	CC	integral component of Golgi membrane	61	5	0.0283616	COAD
GO:0071453	BP	cellular response to oxygen levels	173	10	0.0285627	COAD
GO:0014896	BP	muscle hypertrophy	104	7	0.0288109	COAD
GO:0110157	CC	reelin complex	1	1	0.0288859	COAD
GO:1902076	BP	regulation of lateral motor column neuron migration	1	1	0.0288859	COAD
GO:1902078	BP	positive regulation of lateral motor column neuron migration	1	1	0.0288859	COAD
GO:1905483	BP	regulation of motor neuron migration	1	1	0.0288859	COAD
GO:1905485	BP	positive regulation of motor neuron migration	1	1	0.0288859	COAD
GO:0030293	MF	transmembrane receptor protein tyrosine kinase inhibitor activity	2	1	0.0288971	COAD
GO:0001773	BP	myeloid dendritic cell activation	29	3	0.0289175	COAD
GO:1904752	BP	regulation of vascular associated smooth muscle cell migration	45	4	0.0290531	COAD
GO:1900077	BP	negative regulation of cellular response to insulin stimulus	41	4	0.0291767	COAD
GO:0071144	CC	heteromeric SMAD protein complex	8	2	0.0292535	COAD
GO:0071456	BP	cellular response to hypoxia	149	9	0.0294045	COAD
GO:0009444	BP	pyruvate oxidation	1	1	0.0294541	COAD
GO:0038097	BP	positive regulation of mast cell activation by Fc-epsilon receptor signaling pathway	1	1	0.0294541	COAD
GO:0043843	MF	ADP-specific glucokinase activity	1	1	0.0295619	COAD
GO:0061620	BP	glycolytic process through glucose-6-phosphate	18	3	0.0297612	COAD
GO:0003402	BP	planar cell polarity pathway involved in axis elongation	5	2	0.029921	COAD
GO:0110059	BP	negative regulation of blood vessel endothelial cell differentiation	2	1	0.0300672	COAD
GO:0042975	MF	peroxisome proliferator activated receptor binding	9	2	0.0301562	COAD
GO:0048245	BP	eosinophil chemotaxis	18	2	0.0301996	COAD
GO:0006050	BP	mannosamine metabolic process	2	1	0.0306605	COAD
GO:0006051	BP	N-acetylmannosamine metabolic process	2	1	0.0306605	COAD
GO:1901078	BP	negative regulation of relaxation of muscle	7	2	0.0308292	COAD
GO:0052743	MF	inositol tetrakisphosphate phosphatase activity	8	2	0.0308395	COAD
GO:0034423	CC	autophagosome lumen	1	1	0.031171	COAD
GO:0071985	BP	multivesicular body sorting pathway	47	4	0.031214	COAD
GO:0019389	BP	glucuronoside metabolic process	2	1	0.0313698	COAD
GO:0019391	BP	glucuronoside catabolic process	2	1	0.0313698	COAD
GO:0045179	CC	apical cortex	11	2	0.0314416	COAD
GO:0051126	BP	negative regulation of actin nucleation	9	2	0.0314948	COAD
GO:1900038	BP	negative regulation of cellular response to hypoxia	9	2	0.0315437	COAD
GO:0033629	BP	negative regulation of cell adhesion mediated by integrin	12	2	0.0315817	COAD
GO:0061615	BP	glycolytic process through fructose-6-phosphate	19	3	0.0315836	COAD
GO:0045988	BP	negative regulation of striated muscle contraction	8	2	0.0316191	COAD
GO:1902961	BP	positive regulation of aspartic-type endopeptidase activity involved in amyloid precursor protein catabolic process	7	2	0.0316234	COAD
GO:0019948	MF	SUMO activating enzyme activity	2	1	0.0318088	COAD
GO:0031510	CC	SUMO activating enzyme complex	2	1	0.0318088	COAD
GO:0002694	BP	regulation of leukocyte activation	579	23	0.0319115	COAD
GO:0046634	BP	regulation of alpha-beta T cell activation	110	7	0.0319565	COAD
GO:0006090	BP	pyruvate metabolic process	107	7	0.0319897	COAD
GO:0001954	BP	positive regulation of cell-matrix adhesion	56	5	0.0320284	COAD
GO:1903901	BP	negative regulation of viral life cycle	25	3	0.0320594	COAD
GO:0042135	BP	neurotransmitter catabolic process	10	2	0.0324044	COAD
GO:0010269	BP	response to selenium ion	14	2	0.0325028	COAD
GO:0006937	BP	regulation of muscle contraction	171	10	0.0326894	COAD
GO:0072539	BP	T-helper 17 cell differentiation	30	3	0.0327867	COAD
GO:0051279	BP	regulation of release of sequestered calcium ion into cytosol	81	6	0.0329401	COAD
GO:0042326	BP	negative regulation of phosphorylation	373	18	0.0331045	COAD
GO:0032723	BP	positive regulation of connective tissue growth factor production	2	1	0.0333088	COAD
GO:0072028	BP	nephron morphogenesis	80	7	0.0333736	COAD
GO:0051209	BP	release of sequestered calcium ion into cytosol	123	8	0.0334337	COAD
GO:2000394	BP	positive regulation of lamellipodium morphogenesis	7	2	0.0336167	COAD
GO:0072659	BP	protein localization to plasma membrane	281	15	0.0336758	COAD
GO:0070830	BP	bicellular tight junction assembly	66	5	0.0337696	COAD
GO:0060977	BP	coronary vasculature morphogenesis	19	3	0.0338001	COAD
GO:0097530	BP	granulocyte migration	149	7	0.0338958	COAD
GO:2000527	BP	regulation of myeloid dendritic cell chemotaxis	2	1	0.0340806	COAD
GO:2000529	BP	positive regulation of myeloid dendritic cell chemotaxis	2	1	0.0340806	COAD
GO:0045980	BP	negative regulation of nucleotide metabolic process	25	3	0.0341643	COAD
GO:2000393	BP	negative regulation of lamellipodium morphogenesis	2	1	0.0344061	COAD
GO:0007595	BP	lactation	40	4	0.0344364	COAD
GO:0051283	BP	negative regulation of sequestering of calcium ion	124	8	0.0344509	COAD
GO:0022889	MF	serine transmembrane transporter activity	11	2	0.0344927	COAD
GO:0032329	BP	serine transport	11	2	0.0344927	COAD
GO:0071394	BP	cellular response to testosterone stimulus	10	2	0.0346019	COAD
GO:0090665	CC	glycoprotein complex	22	3	0.0346321	COAD
GO:0050792	BP	regulation of viral process	158	8	0.034739	COAD
GO:0031228	CC	intrinsic component of Golgi membrane	66	5	0.0348435	COAD
GO:0098883	BP	synapse pruning	11	2	0.0351772	COAD
GO:0018242	BP	protein O-linked glycosylation via serine	10	2	0.0352664	COAD
GO:0051282	BP	regulation of sequestering of calcium ion	126	8	0.0357456	COAD
GO:0060603	BP	mammary gland duct morphogenesis	30	4	0.0357734	COAD
GO:0072377	BP	blood coagulation, common pathway	2	1	0.0358784	COAD
GO:0043325	MF	phosphatidylinositol-3,4-bisphosphate binding	26	3	0.03593	COAD
GO:0034021	BP	response to silicon dioxide	3	1	0.0359392	COAD
GO:0032753	BP	positive regulation of interleukin-4 production	27	3	0.0361827	COAD
GO:0014065	BP	phosphatidylinositol 3-kinase signaling	141	9	0.0362477	COAD
GO:0030279	BP	negative regulation of ossification	38	4	0.0362971	COAD
GO:0042731	MF	PH domain binding	7	2	0.036335	COAD
GO:0038179	BP	neurotrophin signaling pathway	37	4	0.0364304	COAD
GO:0015377	MF	cation:chloride symporter activity	20	3	0.0364661	COAD
GO:0120253	BP	hydrocarbon catabolic process	3	1	0.0365431	COAD
GO:0072378	BP	blood coagulation, fibrin clot formation	16	2	0.0366498	COAD
GO:0031430	CC	M band	23	3	0.0367378	COAD
GO:0002819	BP	regulation of adaptive immune response	189	9	0.036824	COAD
GO:0016108	BP	tetraterpenoid metabolic process	3	1	0.0369026	COAD
GO:0016116	BP	carotenoid metabolic process	3	1	0.0369026	COAD
GO:0055064	BP	chloride ion homeostasis	20	3	0.036922	COAD
GO:0055083	BP	monovalent inorganic anion homeostasis	20	3	0.036922	COAD
GO:0002820	BP	negative regulation of adaptive immune response	58	4	0.0369972	COAD
GO:0014068	BP	positive regulation of phosphatidylinositol 3-kinase signaling	78	6	0.037145	COAD
GO:0032926	BP	negative regulation of activin receptor signaling pathway	11	2	0.0371767	COAD
GO:0034332	BP	adherens junction organization	49	5	0.0374786	COAD
GO:0006936	BP	muscle contraction	346	17	0.0375311	COAD
GO:1990266	BP	neutrophil migration	122	6	0.037887	COAD
GO:1905247	BP	positive regulation of aspartic-type peptidase activity	8	2	0.0380723	COAD
GO:0097021	BP	lymphocyte migration into lymphoid organs	9	2	0.0382384	COAD
GO:0072518	MF	Rho-dependent protein serine/threonine kinase activity	2	1	0.0383649	COAD
GO:0110061	BP	regulation of angiotensin-activated signaling pathway	2	1	0.0383649	COAD
GO:0007043	BP	cell-cell junction assembly	147	9	0.0386	COAD
GO:0002683	BP	negative regulation of immune system process	437	17	0.0386488	COAD
GO:0110057	BP	regulation of blood vessel endothelial cell differentiation	3	1	0.0386737	COAD
GO:0048754	BP	branching morphogenesis of an epithelial tube	155	11	0.038796	COAD
GO:0003015	BP	heart process	258	14	0.0389046	COAD
GO:0050902	BP	leukocyte adhesive activation	2	1	0.0392333	COAD
GO:0046975	MF	histone methyltransferase activity (H3-K36 specific)	11	2	0.0392388	COAD
GO:0005153	MF	interleukin-8 receptor binding	2	1	0.0393988	COAD
GO:0036294	BP	cellular response to decreased oxygen levels	157	9	0.0394584	COAD
GO:0014002	BP	astrocyte development	42	4	0.0394796	COAD
GO:0010507	BP	negative regulation of autophagy	84	6	0.039757	COAD
GO:0043367	BP	CD4-positive, alpha-beta T cell differentiation	88	6	0.0398566	COAD
GO:0010616	BP	negative regulation of cardiac muscle adaptation	9	2	0.0400828	COAD
GO:1903243	BP	negative regulation of cardiac muscle hypertrophy in response to stress	9	2	0.0400828	COAD
GO:0030336	BP	negative regulation of cell migration	355	16	0.0400944	COAD
GO:0051208	BP	sequestering of calcium ion	130	8	0.0402325	COAD
GO:2000422	BP	regulation of eosinophil chemotaxis	2	1	0.0405117	COAD
GO:2000424	BP	positive regulation of eosinophil chemotaxis	2	1	0.0405117	COAD
GO:0001730	MF	2'-5'-oligoadenylate synthetase activity	3	1	0.0409552	COAD
GO:0046174	BP	polyol catabolic process	27	3	0.0409615	COAD
GO:0030218	BP	erythrocyte differentiation	128	8	0.041069	COAD
GO:0010611	BP	regulation of cardiac muscle hypertrophy	69	5	0.0410915	COAD
GO:0071141	CC	SMAD protein complex	9	2	0.0411703	COAD
GO:0002009	BP	morphogenesis of an epithelium	518	26	0.041281	COAD
GO:0001763	BP	morphogenesis of a branching structure	201	13	0.0412852	COAD
GO:0044858	BP	plasma membrane raft polarization	1	1	0.0413207	COAD
GO:1903906	BP	regulation of plasma membrane raft polarization	1	1	0.0413207	COAD
GO:1903487	BP	regulation of lactation	3	1	0.0413853	COAD
GO:0043486	BP	histone exchange	16	2	0.041571	COAD
GO:0033292	BP	T-tubule organization	9	2	0.042093	COAD
GO:0030215	MF	semaphorin receptor binding	23	3	0.0424134	COAD
GO:0002366	BP	leukocyte activation involved in immune response	274	12	0.0426268	COAD
GO:0030099	BP	myeloid cell differentiation	403	18	0.0426548	COAD
GO:0009328	CC	phenylalanine-tRNA ligase complex	2	1	0.0426669	COAD
GO:0052372	BP	modulation by symbiont of entry into host	51	4	0.0428258	COAD
GO:0042093	BP	T-helper cell differentiation	68	5	0.0430338	COAD
GO:0062043	BP	positive regulation of cardiac epithelial to mesenchymal transition	9	2	0.0431226	COAD
GO:0040013	BP	negative regulation of locomotion	406	18	0.0431502	COAD
GO:0018444	CC	translation release factor complex	3	1	0.04363	COAD
GO:0031400	BP	negative regulation of protein modification process	510	22	0.0436741	COAD
GO:0006935	BP	chemotaxis	596	27	0.0440087	COAD
GO:0048015	BP	phosphatidylinositol-mediated signaling	171	10	0.0440536	COAD
GO:0051250	BP	negative regulation of lymphocyte activation	160	8	0.0441147	COAD
GO:0098760	BP	response to interleukin-7	14	2	0.0441873	COAD
GO:0098761	BP	cellular response to interleukin-7	14	2	0.0441873	COAD
GO:1903041	BP	regulation of chondrocyte hypertrophy	1	1	0.0443118	COAD
GO:1903043	BP	positive regulation of chondrocyte hypertrophy	1	1	0.0443118	COAD
GO:0006415	BP	translational termination	17	2	0.0443228	COAD
GO:0014705	CC	C zone	1	1	0.0443764	COAD
GO:2000515	BP	negative regulation of CD4-positive, alpha-beta T cell activation	32	3	0.0443781	COAD
GO:0070293	BP	renal absorption	29	3	0.044423	COAD
GO:0002294	BP	CD4-positive, alpha-beta T cell differentiation involved in immune response	70	5	0.0445276	COAD
GO:0042330	BP	taxis	598	27	0.0446792	COAD
GO:0004739	MF	pyruvate dehydrogenase (acetyl-transferring) activity	3	1	0.0449003	COAD
GO:0033235	BP	positive regulation of protein sumoylation	12	2	0.0450718	COAD
GO:0045656	BP	negative regulation of monocyte differentiation	8	2	0.0454627	COAD
GO:0070442	CC	integrin alphaIIb-beta3 complex	1	1	0.045487	COAD
GO:0048729	BP	tissue morphogenesis	628	30	0.0456756	COAD
GO:1903713	BP	asparagine transmembrane transport	2	1	0.045696	COAD
GO:0014037	BP	Schwann cell differentiation	38	4	0.0457145	COAD
GO:0010811	BP	positive regulation of cell-substrate adhesion	125	8	0.0457699	COAD
GO:0015379	MF	potassium:chloride symporter activity	9	2	0.0458043	COAD
GO:0002679	BP	respiratory burst involved in defense response	14	2	0.0458231	COAD
GO:0016600	CC	flotillin complex	9	2	0.0459388	COAD
GO:1900744	BP	regulation of p38MAPK cascade	44	4	0.0460366	COAD
GO:0001819	BP	positive regulation of cytokine production	477	18	0.0461928	COAD
GO:0031463	CC	Cul3-RING ubiquitin ligase complex	36	3	0.0462463	COAD
GO:0045822	BP	negative regulation of heart contraction	26	3	0.0462728	COAD
GO:0055001	BP	muscle cell development	191	11	0.0463817	COAD
GO:0010796	BP	regulation of multivesicular body size	2	1	0.0464143	COAD
GO:0015369	MF	calcium:proton antiporter activity	1	1	0.0465749	COAD
GO:0045932	BP	negative regulation of muscle contraction	25	3	0.0467011	COAD
GO:0016492	MF	G protein-coupled neurotensin receptor activity	2	1	0.0467117	COAD
GO:0008519	MF	ammonium transmembrane transporter activity	10	2	0.0468827	COAD
GO:0072488	BP	ammonium transmembrane transport	10	2	0.0468827	COAD
GO:2000048	BP	negative regulation of cell-cell adhesion mediated by cadherin	9	2	0.0468845	COAD
GO:0062042	BP	regulation of cardiac epithelial to mesenchymal transition	10	2	0.0469756	COAD
GO:0014743	BP	regulation of muscle hypertrophy	72	5	0.0470126	COAD
GO:0120192	BP	tight junction assembly	72	5	0.0470409	COAD
GO:0030526	CC	granulocyte macrophage colony-stimulating factor receptor complex	3	1	0.0471594	COAD
GO:0038157	BP	granulocyte-macrophage colony-stimulating factor signaling pathway	3	1	0.0471594	COAD
GO:0032601	BP	connective tissue growth factor production	3	1	0.0473596	COAD
GO:0032643	BP	regulation of connective tissue growth factor production	3	1	0.0473596	COAD
GO:0098691	CC	dopaminergic synapse	11	2	0.0475872	COAD
GO:0002287	BP	alpha-beta T cell activation involved in immune response	71	5	0.0476144	COAD
GO:0002293	BP	alpha-beta T cell differentiation involved in immune response	71	5	0.0476144	COAD
GO:0005365	MF	myo-inositol transmembrane transporter activity	3	1	0.0476617	COAD
GO:0061138	BP	morphogenesis of a branching epithelium	186	12	0.0476964	COAD
GO:0061760	BP	antifungal innate immune response	18	2	0.0477271	COAD
GO:2001223	BP	negative regulation of neuron migration	12	2	0.0477599	COAD
GO:0060346	BP	bone trabecula formation	10	2	0.047767	COAD
GO:2000395	BP	regulation of ubiquitin-dependent endocytosis	2	1	0.0477986	COAD
GO:2000397	BP	positive regulation of ubiquitin-dependent endocytosis	2	1	0.0477986	COAD
GO:0030695	MF	GTPase regulator activity	456	22	0.0478391	COAD
GO:0060589	MF	nucleoside-triphosphatase regulator activity	456	22	0.0478391	COAD
GO:0044027	BP	hypermethylation of CpG island	2	1	0.0478807	COAD
GO:0009895	BP	negative regulation of catabolic process	320	15	0.0479293	COAD
GO:0048873	BP	homeostasis of number of cells within a tissue	29	3	0.0480445	COAD
GO:1902993	BP	positive regulation of amyloid precursor protein catabolic process	25	3	0.0480616	COAD
GO:0045159	MF	myosin II binding	13	2	0.0482024	COAD
GO:0035308	BP	negative regulation of protein dephosphorylation	33	3	0.0482603	COAD
GO:0002263	BP	cell activation involved in immune response	278	12	0.0482978	COAD
GO:1905035	BP	negative regulation of antifungal innate immune response	2	1	0.0484067	COAD
GO:0006941	BP	striated muscle contraction	177	10	0.0484299	COAD
GO:0002698	BP	negative regulation of immune effector process	118	6	0.0484886	COAD
GO:0101030	BP	tRNA-guanine transglycosylation	3	1	0.0489584	COAD
GO:0070294	BP	renal sodium ion absorption	10	2	0.0490976	COAD
GO:0070168	BP	negative regulation of biomineral tissue development	28	3	0.0491803	COAD
GO:0060742	BP	epithelial cell differentiation involved in prostate gland development	11	2	0.0491937	COAD
GO:0001701	BP	in utero embryonic development	388	18	0.0492879	COAD
GO:0072676	BP	lymphocyte migration	112	6	0.0495078	COAD
GO:0018023	BP	peptidyl-lysine trimethylation	56	4	0.0496522	COAD
GO:0005886	CC	plasma membrane	5267	159	0.0497085	COAD
GO:0050832	BP	defense response to fungus	48	3	0.0497461	COAD
GO:0031915	BP	positive regulation of synaptic plasticity	9	2	0.0499048	COAD
GO:0003108	BP	negative regulation of the force of heart contraction by chemical signal	1	1	0.0499144	COAD
GO:1901081	BP	negative regulation of relaxation of smooth muscle	1	1	0.0499144	COAD

## Sheet: KIRC
ID	ONTOLOGY	TERM	N	DE	P.DE	Cancer
GO:0098911	BP	regulation of ventricular cardiac muscle cell action potential	12	6	7.57682e-05	KIRC
GO:0045820	BP	negative regulation of glycolytic process	14	5	0.000402704	KIRC
GO:0010595	BP	positive regulation of endothelial cell migration	127	16	0.000458734	KIRC
GO:0036486	BP	ventral trunk neural crest cell migration	3	3	0.000514773	KIRC
GO:0062099	BP	negative regulation of programmed necrotic cell death	22	5	0.000527839	KIRC
GO:0098609	BP	cell-cell adhesion	933	68	0.000634501	KIRC
GO:0097300	BP	programmed necrotic cell death	53	8	0.000641985	KIRC
GO:0033135	BP	regulation of peptidyl-serine phosphorylation	127	16	0.000833318	KIRC
GO:0007156	BP	homophilic cell adhesion via plasma membrane adhesion molecules	166	18	0.000954032	KIRC
GO:0007229	BP	integrin-mediated signaling pathway	113	15	0.000962759	KIRC
GO:0048147	BP	negative regulation of fibroblast proliferation	33	7	0.00111825	KIRC
GO:0003254	BP	regulation of membrane depolarization	45	8	0.0011238	KIRC
GO:0030036	BP	actin cytoskeleton organization	715	59	0.00115282	KIRC
GO:0005010	MF	insulin-like growth factor receptor activity	3	3	0.00116627	KIRC
GO:0044273	BP	sulfur compound catabolic process	33	6	0.00122654	KIRC
GO:0043235	CC	receptor complex	403	36	0.00127311	KIRC
GO:0046434	BP	organophosphate catabolic process	159	16	0.00130078	KIRC
GO:0007155	BP	cell adhesion	1504	100	0.00132317	KIRC
GO:0097490	BP	sympathetic neuron projection extension	4	3	0.00139111	KIRC
GO:0097491	BP	sympathetic neuron projection guidance	4	3	0.00139111	KIRC
GO:0036490	BP	regulation of translation in response to endoplasmic reticulum stress	11	4	0.00144501	KIRC
GO:0048016	BP	inositol phosphate-mediated signaling	58	10	0.00150203	KIRC
GO:0072584	BP	caveolin-mediated endocytosis	11	4	0.00156352	KIRC
GO:0060547	BP	negative regulation of necrotic cell death	28	5	0.00161491	KIRC
GO:0030029	BP	actin filament-based process	804	64	0.00170917	KIRC
GO:0005509	MF	calcium ion binding	681	49	0.00173806	KIRC
GO:0086103	BP	G protein-coupled receptor signaling pathway involved in heart process	18	5	0.00178678	KIRC
GO:0031143	CC	pseudopodium	17	5	0.00205835	KIRC
GO:1901568	BP	fatty acid derivative metabolic process	70	9	0.00211461	KIRC
GO:1903579	BP	negative regulation of ATP metabolic process	20	5	0.00217023	KIRC
GO:1901748	BP	leukotriene D4 metabolic process	7	3	0.00226182	KIRC
GO:0043555	BP	regulation of translation in response to stress	21	5	0.00240466	KIRC
GO:0038132	MF	neuregulin binding	5	3	0.00243638	KIRC
GO:0072093	BP	metanephric renal vesicle formation	4	3	0.00254036	KIRC
GO:0010634	BP	positive regulation of epithelial cell migration	172	18	0.00273327	KIRC
GO:1901569	BP	fatty acid derivative catabolic process	18	4	0.00281962	KIRC
GO:0033138	BP	positive regulation of peptidyl-serine phosphorylation	93	12	0.00282243	KIRC
GO:0098802	CC	plasma membrane signaling receptor complex	182	18	0.00316695	KIRC
GO:0018105	BP	peptidyl-serine phosphorylation	295	27	0.00324624	KIRC
GO:0006750	BP	glutathione biosynthetic process	15	4	0.00343459	KIRC
GO:0030308	BP	negative regulation of cell growth	187	20	0.00343831	KIRC
GO:1900543	BP	negative regulation of purine nucleotide metabolic process	23	5	0.00352136	KIRC
GO:1903578	BP	regulation of ATP metabolic process	71	9	0.00366331	KIRC
GO:0003883	MF	CTP synthase activity	2	2	0.00370006	KIRC
GO:0044210	BP	'de novo' CTP biosynthetic process	2	2	0.00370006	KIRC
GO:0032970	BP	regulation of actin filament-based process	395	34	0.00375369	KIRC
GO:0051900	BP	regulation of mitochondrial depolarization	18	4	0.00380518	KIRC
GO:0098742	BP	cell-cell adhesion via plasma-membrane adhesion molecules	276	24	0.00389678	KIRC
GO:0086005	BP	ventricular cardiac muscle cell action potential	35	7	0.00391667	KIRC
GO:1903071	BP	positive regulation of ER-associated ubiquitin-dependent protein catabolic process	7	3	0.00395089	KIRC
GO:0060546	BP	negative regulation of necroptotic process	21	4	0.00413455	KIRC
GO:0070265	BP	necrotic cell death	70	8	0.00436241	KIRC
GO:0008093	MF	cytoskeletal anchor activity	23	6	0.0043739	KIRC
GO:0030212	BP	hyaluronan metabolic process	35	6	0.0043824	KIRC
GO:0070160	CC	tight junction	129	14	0.00447896	KIRC
GO:0070169	BP	positive regulation of biomineral tissue development	55	9	0.00450042	KIRC
GO:0051899	BP	membrane depolarization	84	11	0.0045009	KIRC
GO:0033869	BP	nucleoside bisphosphate catabolic process	11	3	0.00466139	KIRC
GO:0034031	BP	ribonucleoside bisphosphate catabolic process	11	3	0.00466139	KIRC
GO:0034034	BP	purine nucleoside bisphosphate catabolic process	11	3	0.00466139	KIRC
GO:0070207	BP	protein homotrimerization	15	4	0.00469859	KIRC
GO:0072338	BP	cellular lactam metabolic process	2	2	0.00473523	KIRC
GO:0019184	BP	nonribosomal peptide biosynthetic process	17	4	0.00476901	KIRC
GO:0045844	BP	positive regulation of striated muscle tissue development	3	2	0.00485125	KIRC
GO:0048636	BP	positive regulation of muscle organ development	3	2	0.00485125	KIRC
GO:0048144	BP	fibroblast proliferation	102	12	0.00489197	KIRC
GO:0050678	BP	regulation of epithelial cell proliferation	407	32	0.00503473	KIRC
GO:0045980	BP	negative regulation of nucleotide metabolic process	25	5	0.00526625	KIRC
GO:0110151	BP	positive regulation of biomineralization	56	9	0.00543823	KIRC
GO:1900542	BP	regulation of purine nucleotide metabolic process	91	10	0.00550695	KIRC
GO:0035290	BP	trunk segmentation	5	3	0.00554837	KIRC
GO:0036484	BP	trunk neural crest cell migration	5	3	0.00554837	KIRC
GO:0048145	BP	regulation of fibroblast proliferation	86	11	0.00561547	KIRC
GO:0032055	BP	negative regulation of translation in response to stress	3	2	0.00566928	KIRC
GO:0032056	BP	positive regulation of translation in response to stress	7	3	0.00572552	KIRC
GO:0051493	BP	regulation of cytoskeleton organization	524	40	0.00576475	KIRC
GO:0005901	CC	caveola	82	11	0.00577229	KIRC
GO:0042134	MF	rRNA primary transcript binding	3	2	0.00584461	KIRC
GO:0016788	MF	hydrolase activity, acting on ester bonds	736	45	0.00595359	KIRC
GO:1903069	BP	regulation of ER-associated ubiquitin-dependent protein catabolic process	9	3	0.00609096	KIRC
GO:1901166	BP	neural crest cell migration involved in autonomic nervous system development	6	3	0.00611026	KIRC
GO:0051764	BP	actin crosslink formation	14	4	0.00612455	KIRC
GO:0031957	MF	very long-chain fatty acid-CoA ligase activity	10	3	0.00621136	KIRC
GO:0002095	CC	caveolar macromolecular signaling complex	2	2	0.00621419	KIRC
GO:0001935	BP	endothelial cell proliferation	193	16	0.00626707	KIRC
GO:0004668	MF	protein-arginine deiminase activity	5	2	0.00650985	KIRC
GO:0062098	BP	regulation of programmed necrotic cell death	35	5	0.00658247	KIRC
GO:2000249	BP	regulation of actin cytoskeleton reorganization	42	7	0.00675725	KIRC
GO:0015026	MF	coreceptor activity	47	7	0.00684197	KIRC
GO:0045668	BP	negative regulation of osteoblast differentiation	54	8	0.0068695	KIRC
GO:0030501	BP	positive regulation of bone mineralization	45	8	0.00692128	KIRC
GO:0018209	BP	peptidyl-serine modification	314	27	0.00692563	KIRC
GO:0051882	BP	mitochondrial depolarization	20	4	0.00695178	KIRC
GO:0006110	BP	regulation of glycolytic process	47	7	0.0069837	KIRC
GO:0030674	MF	protein-macromolecule adaptor activity	341	27	0.00706269	KIRC
GO:0070206	BP	protein trimerization	17	4	0.00727023	KIRC
GO:0006140	BP	regulation of nucleotide metabolic process	96	10	0.00738248	KIRC
GO:0042398	BP	cellular modified amino acid biosynthetic process	42	6	0.00739377	KIRC
GO:0043296	CC	apical junction complex	147	15	0.00749183	KIRC
GO:0005923	CC	bicellular tight junction	124	13	0.00750007	KIRC
GO:0097296	BP	activation of cysteine-type endopeptidase activity involved in apoptotic signaling pathway	3	2	0.00754455	KIRC
GO:0050673	BP	epithelial cell proliferation	474	35	0.00759755	KIRC
GO:0033043	BP	regulation of organelle organization	1159	71	0.00760556	KIRC
GO:0031032	BP	actomyosin structure organization	202	20	0.00764718	KIRC
GO:0044282	BP	small molecule catabolic process	379	25	0.00767669	KIRC
GO:0060623	BP	regulation of chromosome condensation	11	3	0.00795339	KIRC
GO:0062012	BP	regulation of small molecule metabolic process	332	25	0.00801588	KIRC
GO:0016049	BP	cell growth	486	39	0.00803225	KIRC
GO:0007044	BP	cell-substrate junction assembly	95	13	0.00839661	KIRC
GO:1900026	BP	positive regulation of substrate adhesion-dependent cell spreading	44	7	0.00844573	KIRC
GO:0042758	BP	long-chain fatty acid catabolic process	5	2	0.00846267	KIRC
GO:0000900	MF	mRNA regulatory element binding translation repressor activity	15	4	0.00853131	KIRC
GO:0045912	BP	negative regulation of carbohydrate metabolic process	50	7	0.00853334	KIRC
GO:0044325	MF	transmembrane transporter binding	125	14	0.0085894	KIRC
GO:0000821	BP	regulation of arginine metabolic process	4	2	0.00892906	KIRC
GO:0003945	MF	N-acetyllactosamine synthase activity	5	2	0.00897626	KIRC
GO:0021649	BP	vestibulocochlear nerve structural organization	2	2	0.0091667	KIRC
GO:0061552	BP	ganglion morphogenesis	2	2	0.0091667	KIRC
GO:1903375	BP	facioacoustic ganglion development	2	2	0.0091667	KIRC
GO:1904835	BP	dorsal root ganglion morphogenesis	2	2	0.0091667	KIRC
GO:0045022	BP	early endosome to late endosome transport	42	6	0.00928323	KIRC
GO:0046838	BP	phosphorylated carbohydrate dephosphorylation	17	4	0.00940302	KIRC
GO:0046855	BP	inositol phosphate dephosphorylation	17	4	0.00940302	KIRC
GO:0071526	BP	semaphorin-plexin signaling pathway	44	8	0.0094087	KIRC
GO:0006563	BP	L-serine metabolic process	12	3	0.00960537	KIRC
GO:0019752	BP	carboxylic acid metabolic process	894	49	0.00964918	KIRC
GO:0032787	BP	monocarboxylic acid metabolic process	592	35	0.00984438	KIRC
GO:0098901	BP	regulation of cardiac muscle cell action potential	31	6	0.00997678	KIRC
GO:1904928	MF	coreceptor activity involved in canonical Wnt signaling pathway	3	2	0.010089	KIRC
GO:0060341	BP	regulation of cellular localization	946	60	0.0101181	KIRC
GO:0001844	BP	protein insertion into mitochondrial membrane involved in apoptotic signaling pathway	6	2	0.0101518	KIRC
GO:1904385	BP	cellular response to angiotensin	27	5	0.0102149	KIRC
GO:0042127	BP	regulation of cell population proliferation	1709	99	0.0102281	KIRC
GO:0009071	BP	serine family amino acid catabolic process	14	3	0.0103345	KIRC
GO:0031996	MF	thioesterase binding	11	3	0.0104959	KIRC
GO:0016813	MF	hydrolase activity, acting on carbon-nitrogen (but not peptide) bonds, in linear amidines	11	3	0.0105576	KIRC
GO:0019637	BP	organophosphate metabolic process	1002	57	0.0106423	KIRC
GO:0019838	MF	growth factor binding	129	15	0.0106656	KIRC
GO:0035866	CC	alphav-beta3 integrin-PKCalpha complex	3	2	0.0106829	KIRC
GO:0036374	MF	glutathione hydrolase activity	4	2	0.0107839	KIRC
GO:0102953	MF	hypoglycin A gamma-glutamyl transpeptidase activity	4	2	0.0107839	KIRC
GO:0103068	MF	leukotriene C4 gamma-glutamyl transferase activity	4	2	0.0107839	KIRC
GO:0043878	MF	glyceraldehyde-3-phosphate dehydrogenase (NAD+) (non-phosphorylating) activity	7	2	0.0108721	KIRC
GO:0060056	BP	mammary gland involution	9	3	0.0109414	KIRC
GO:0006796	BP	phosphate-containing compound metabolic process	2700	147	0.0109513	KIRC
GO:1903715	BP	regulation of aerobic respiration	31	5	0.0109544	KIRC
GO:0046164	BP	alcohol catabolic process	52	6	0.0109653	KIRC
GO:0032956	BP	regulation of actin cytoskeleton organization	354	29	0.0110064	KIRC
GO:0060764	BP	cell-cell signaling involved in mammary gland development	2	2	0.0111581	KIRC
GO:0006082	BP	organic acid metabolic process	926	50	0.0112578	KIRC
GO:0038128	BP	ERBB2 signaling pathway	17	4	0.0112955	KIRC
GO:0001965	MF	G-protein alpha-subunit binding	26	5	0.0113155	KIRC
GO:0061549	BP	sympathetic ganglion development	9	3	0.0113622	KIRC
GO:0046777	BP	protein autophosphorylation	225	21	0.011441	KIRC
GO:0034329	BP	cell junction assembly	423	36	0.0114679	KIRC
GO:0002082	BP	regulation of oxidative phosphorylation	22	4	0.011574	KIRC
GO:0006793	BP	phosphorus metabolic process	2726	148	0.011598	KIRC
GO:0007266	BP	Rho protein signal transduction	138	14	0.011692	KIRC
GO:0008285	BP	negative regulation of cell population proliferation	769	50	0.0117103	KIRC
GO:0010594	BP	regulation of endothelial cell migration	221	18	0.0117925	KIRC
GO:0015137	MF	citrate transmembrane transporter activity	4	2	0.0118951	KIRC
GO:0015142	MF	tricarboxylic acid transmembrane transporter activity	4	2	0.0118951	KIRC
GO:1990778	BP	protein localization to cell periphery	333	27	0.0120283	KIRC
GO:0045875	BP	negative regulation of sister chromatid cohesion	5	2	0.0121152	KIRC
GO:0010626	BP	negative regulation of Schwann cell proliferation	8	3	0.0121763	KIRC
GO:0019370	BP	leukotriene biosynthetic process	16	3	0.0123363	KIRC
GO:0071545	BP	inositol phosphate catabolic process	19	4	0.0123446	KIRC
GO:0004530	MF	deoxyribonuclease I activity	5	2	0.0123641	KIRC
GO:1901575	BP	organic substance catabolic process	2054	105	0.0124899	KIRC
GO:0051373	MF	FATZ binding	5	2	0.0125664	KIRC
GO:0086002	BP	cardiac muscle cell action potential involved in contraction	53	8	0.012685	KIRC
GO:0070051	MF	fibrinogen binding	4	2	0.0128019	KIRC
GO:1902225	BP	negative regulation of acrosome reaction	1	1	0.012919	KIRC
GO:0045926	BP	negative regulation of growth	247	22	0.0130793	KIRC
GO:0150115	BP	cell-substrate junction organization	101	13	0.0131269	KIRC
GO:0035025	BP	positive regulation of Rho protein signal transduction	32	5	0.0131697	KIRC
GO:0086001	BP	cardiac muscle cell action potential	78	10	0.0133711	KIRC
GO:0033599	BP	regulation of mammary gland epithelial cell proliferation	15	4	0.0134931	KIRC
GO:1903078	BP	positive regulation of protein localization to plasma membrane	59	8	0.0135263	KIRC
GO:1901750	BP	leukotriene D4 biosynthetic process	5	2	0.0135813	KIRC
GO:0006575	BP	cellular modified amino acid metabolic process	162	13	0.0135953	KIRC
GO:0070836	BP	caveola assembly	4	2	0.0138029	KIRC
GO:0043605	BP	cellular amide catabolic process	4	2	0.0138572	KIRC
GO:0086098	BP	angiotensin-activated signaling pathway involved in heart process	3	2	0.0140458	KIRC
GO:1901616	BP	organic hydroxy compound catabolic process	75	7	0.014222	KIRC
GO:1903829	BP	positive regulation of protein localization	446	32	0.0143748	KIRC
GO:0016202	BP	regulation of striated muscle tissue development	17	4	0.0143917	KIRC
GO:0001501	BP	skeletal system development	536	42	0.0145451	KIRC
GO:0051894	BP	positive regulation of focal adhesion assembly	26	5	0.0146667	KIRC
GO:0016477	BP	cell migration	1537	95	0.0146828	KIRC
GO:0019240	BP	citrulline biosynthetic process	5	2	0.0147079	KIRC
GO:0001558	BP	regulation of cell growth	415	33	0.0147632	KIRC
GO:0043457	BP	regulation of cellular respiration	48	6	0.0147715	KIRC
GO:1903965	BP	monounsaturated fatty acid catabolic process	1	1	0.0147725	KIRC
GO:0043436	BP	oxoacid metabolic process	919	49	0.0149379	KIRC
GO:1990776	BP	response to angiotensin	31	5	0.0150034	KIRC
GO:0043470	BP	regulation of carbohydrate catabolic process	56	7	0.0150701	KIRC
GO:0038083	BP	peptidyl-tyrosine autophosphorylation	21	5	0.0150735	KIRC
GO:0040007	BP	growth	902	62	0.0150919	KIRC
GO:0006545	BP	glycine biosynthetic process	7	2	0.0150987	KIRC
GO:0044281	BP	small molecule metabolic process	1780	89	0.0153466	KIRC
GO:0032386	BP	regulation of intracellular transport	330	24	0.015465	KIRC
GO:0006691	BP	leukotriene metabolic process	30	4	0.0155705	KIRC
GO:2000401	BP	regulation of lymphocyte migration	65	7	0.0157445	KIRC
GO:0048485	BP	sympathetic nervous system development	22	5	0.0157817	KIRC
GO:0006842	BP	tricarboxylic acid transport	5	2	0.0159801	KIRC
GO:0015746	BP	citrate transport	5	2	0.0159801	KIRC
GO:0098927	BP	vesicle-mediated transport between endosomal compartments	45	6	0.016214	KIRC
GO:0097268	CC	cytoophidium	3	2	0.0162657	KIRC
GO:0086004	BP	regulation of cardiac muscle cell contraction	34	6	0.0165249	KIRC
GO:0036458	MF	hepatocyte growth factor binding	1	1	0.0166062	KIRC
GO:0036115	BP	fatty-acyl-CoA catabolic process	6	2	0.0166173	KIRC
GO:0035867	CC	alphav-beta3 integrin-IGF-1-IGF1R complex	4	2	0.0166285	KIRC
GO:0097374	BP	sensory neuron axon guidance	3	2	0.0167321	KIRC
GO:0046578	BP	regulation of Ras protein signal transduction	186	18	0.0167572	KIRC
GO:0007172	BP	signal complex assembly	8	3	0.0170141	KIRC
GO:0030500	BP	regulation of bone mineralization	82	10	0.0171108	KIRC
GO:0004866	MF	endopeptidase inhibitor activity	172	11	0.017349	KIRC
GO:0035331	BP	negative regulation of hippo signaling	13	4	0.0173735	KIRC
GO:0005324	MF	long-chain fatty acid transporter activity	17	3	0.0174858	KIRC
GO:0048870	BP	cell motility	1728	102	0.0177361	KIRC
GO:0072033	BP	renal vesicle formation	8	3	0.0178411	KIRC
GO:0004683	MF	calmodulin-dependent protein kinase activity	27	5	0.0178507	KIRC
GO:0048642	BP	negative regulation of skeletal muscle tissue development	4	2	0.0180078	KIRC
GO:0052745	MF	inositol phosphate phosphatase activity	18	4	0.0180703	KIRC
GO:0043297	BP	apical junction assembly	74	8	0.0181282	KIRC
GO:0072283	BP	metanephric renal vesicle morphogenesis	15	4	0.018406	KIRC
GO:0021612	BP	facial nerve structural organization	8	3	0.0184425	KIRC
GO:0045517	MF	interleukin-20 receptor binding	1	1	0.018604	KIRC
GO:0035023	BP	regulation of Rho protein signal transduction	86	10	0.0186087	KIRC
GO:0008283	BP	cell population proliferation	1988	111	0.0186343	KIRC
GO:0006790	BP	sulfur compound metabolic process	314	21	0.0190424	KIRC
GO:0071944	CC	cell periphery	5743	281	0.0191543	KIRC
GO:0030038	BP	contractile actin filament bundle assembly	108	12	0.0194012	KIRC
GO:0043149	BP	stress fiber assembly	108	12	0.0194012	KIRC
GO:0016877	MF	ligase activity, forming carbon-sulfur bonds	39	5	0.0194637	KIRC
GO:0003912	MF	DNA nucleotidylexotransferase activity	1	1	0.0195898	KIRC
GO:0070167	BP	regulation of biomineral tissue development	101	11	0.0196627	KIRC
GO:0006749	BP	glutathione metabolic process	43	5	0.0196647	KIRC
GO:0010624	BP	regulation of Schwann cell proliferation	11	3	0.0199319	KIRC
GO:0014010	BP	Schwann cell proliferation	11	3	0.0199319	KIRC
GO:0002736	BP	regulation of plasmacytoid dendritic cell cytokine production	1	1	0.0199943	KIRC
GO:0002737	BP	negative regulation of plasmacytoid dendritic cell cytokine production	1	1	0.0199943	KIRC
GO:0045778	BP	positive regulation of ossification	54	8	0.0200264	KIRC
GO:1990738	MF	pseudouridine 5'-phosphatase activity	1	1	0.0200572	KIRC
GO:0060544	BP	regulation of necroptotic process	32	4	0.0201931	KIRC
GO:0015607	MF	ABC-type fatty-acyl-CoA transporter activity	1	1	0.0202108	KIRC
GO:0036113	BP	very long-chain fatty-acyl-CoA catabolic process	1	1	0.0202108	KIRC
GO:0070667	BP	negative regulation of mast cell proliferation	4	2	0.0202251	KIRC
GO:0042578	MF	phosphoric ester hydrolase activity	359	26	0.0202987	KIRC
GO:0005794	CC	Golgi apparatus	1586	89	0.0203383	KIRC
GO:0051008	MF	Hsp27 protein binding	1	1	0.0203772	KIRC
GO:0006565	BP	L-serine catabolic process	5	2	0.0204295	KIRC
GO:0005000	MF	vasopressin receptor activity	7	2	0.0205873	KIRC
GO:0047617	MF	acyl-CoA hydrolase activity	22	3	0.0206486	KIRC
GO:0033137	BP	negative regulation of peptidyl-serine phosphorylation	30	5	0.0208578	KIRC
GO:0047058	MF	vitamin-K-epoxide reductase (warfarin-insensitive) activity	1	1	0.0208904	KIRC
GO:0018549	MF	methanethiol oxidase activity	1	1	0.0209768	KIRC
GO:0016269	BP	O-glycan processing, core 3	1	1	0.0213425	KIRC
GO:0047224	MF	acetylgalactosaminyl-O-glycosyl-glycoprotein beta-1,3-N-acetylglucosaminyltransferase activity	1	1	0.0213425	KIRC
GO:0106327	MF	acetylgalactosaminyl-O-glycosyl-threonyl-glycoprotein beta-1,3-N-acetylglucosaminyltransferase activity	1	1	0.0213425	KIRC
GO:0106328	MF	acetylgalactosaminyl-O-glycosyl-seryl-glycoprotein beta-1,3-N-acetylglucosaminyltransferase activity	1	1	0.0213425	KIRC
GO:1902905	BP	positive regulation of supramolecular fiber organization	175	16	0.0213723	KIRC
GO:0050728	BP	negative regulation of inflammatory response	177	12	0.021445	KIRC
GO:0004408	MF	holocytochrome-c synthase activity	1	1	0.0214581	KIRC
GO:0017003	BP	protein-heme linkage	1	1	0.0214581	KIRC
GO:0017006	BP	protein-tetrapyrrole linkage	1	1	0.0214581	KIRC
GO:0018063	BP	cytochrome c-heme linkage	1	1	0.0214581	KIRC
GO:0035329	BP	hippo signaling	43	7	0.0215477	KIRC
GO:0071936	MF	coreceptor activity involved in Wnt signaling pathway	9	3	0.02162	KIRC
GO:0032976	BP	release of matrix enzymes from mitochondria	1	1	0.0216557	KIRC
GO:0097144	CC	BAX complex	1	1	0.0216557	KIRC
GO:1990117	BP	B cell receptor apoptotic signaling pathway	1	1	0.0216557	KIRC
GO:0000802	CC	transverse filament	1	1	0.0217027	KIRC
GO:0051878	BP	lateral element assembly	1	1	0.0217027	KIRC
GO:0046112	BP	nucleobase biosynthetic process	18	3	0.0219378	KIRC
GO:1901148	BP	gene expression involved in extracellular matrix organization	1	1	0.0219509	KIRC
GO:0047708	MF	biotinidase activity	1	1	0.0219654	KIRC
GO:1905898	BP	positive regulation of response to endoplasmic reticulum stress	35	5	0.0221036	KIRC
GO:0008013	MF	beta-catenin binding	87	11	0.0221297	KIRC
GO:0004514	MF	nicotinate-nucleotide diphosphorylase (carboxylating) activity	1	1	0.0221969	KIRC
GO:0034213	BP	quinolinate catabolic process	1	1	0.0221969	KIRC
GO:0044262	BP	cellular carbohydrate metabolic process	290	21	0.0223919	KIRC
GO:0110149	BP	regulation of biomineralization	103	11	0.0224535	KIRC
GO:0030414	MF	peptidase inhibitor activity	179	11	0.0227408	KIRC
GO:1903910	BP	negative regulation of receptor clustering	1	1	0.0227662	KIRC
GO:1904394	BP	negative regulation of skeletal muscle acetylcholine-gated channel clustering	1	1	0.0227662	KIRC
GO:0030016	CC	myofibril	229	19	0.0228721	KIRC
GO:0005160	MF	transforming growth factor beta receptor binding	23	4	0.0229328	KIRC
GO:0006090	BP	pyruvate metabolic process	107	10	0.0230789	KIRC
GO:0032570	BP	response to progesterone	38	6	0.023192	KIRC
GO:0045655	BP	regulation of monocyte differentiation	20	4	0.023305	KIRC
GO:0004760	MF	serine-pyruvate transaminase activity	1	1	0.0234642	KIRC
GO:0050680	BP	negative regulation of epithelial cell proliferation	171	14	0.0234663	KIRC
GO:0045444	BP	fat cell differentiation	242	20	0.0236129	KIRC
GO:0019178	MF	NADP phosphatase activity	1	1	0.0236207	KIRC
GO:0102757	MF	NADPH phosphatase activity	1	1	0.0236207	KIRC
GO:0070266	BP	necroptotic process	46	5	0.0237837	KIRC
GO:0008305	CC	integrin complex	31	5	0.023915	KIRC
GO:0004043	MF	L-aminoadipate-semialdehyde dehydrogenase activity	1	1	0.0239792	KIRC
GO:0008802	MF	betaine-aldehyde dehydrogenase activity	1	1	0.0239792	KIRC
GO:0060192	BP	negative regulation of lipase activity	15	3	0.0241479	KIRC
GO:0005126	MF	cytokine receptor binding	242	15	0.0241831	KIRC
GO:1902262	BP	apoptotic process involved in blood vessel morphogenesis	5	2	0.0244879	KIRC
GO:0070830	BP	bicellular tight junction assembly	66	7	0.0246004	KIRC
GO:1905475	BP	regulation of protein localization to membrane	170	15	0.0247202	KIRC
GO:0048471	CC	perinuclear region of cytoplasm	719	46	0.024967	KIRC
GO:1904375	BP	regulation of protein localization to cell periphery	124	12	0.0250148	KIRC
GO:0045907	BP	positive regulation of vasoconstriction	33	5	0.0250543	KIRC
GO:0004867	MF	serine-type endopeptidase inhibitor activity	93	7	0.0251513	KIRC
GO:0016289	MF	CoA hydrolase activity	24	3	0.0253124	KIRC
GO:0070003	MF	threonine-type peptidase activity	15	3	0.0254286	KIRC
GO:0030278	BP	regulation of ossification	121	13	0.0256111	KIRC
GO:0035033	MF	histone deacetylase regulator activity	5	2	0.0256421	KIRC
GO:0038133	BP	ERBB2-ERBB3 signaling pathway	4	2	0.0258209	KIRC
GO:0005975	BP	carbohydrate metabolic process	578	36	0.0259463	KIRC
GO:0003383	BP	apical constriction	4	2	0.0259817	KIRC
GO:0004672	MF	protein kinase activity	555	41	0.0259934	KIRC
GO:0035330	BP	regulation of hippo signaling	24	5	0.0262227	KIRC
GO:0060090	MF	molecular adaptor activity	479	33	0.0264315	KIRC
GO:1904377	BP	positive regulation of protein localization to cell periphery	67	8	0.0265451	KIRC
GO:0140795	MF	histone-arginine deiminase activity (H3-R2 specific)	1	1	0.0266528	KIRC
GO:0140796	MF	histone-arginine deiminase activity (H3-R8 specific)	1	1	0.0266528	KIRC
GO:0140797	MF	histone-arginine deiminase activity (H3-R17 specific)	1	1	0.0266528	KIRC
GO:0098858	CC	actin-based cell projection	221	19	0.0266563	KIRC
GO:0005903	CC	brush border	99	10	0.0266931	KIRC
GO:0043542	BP	endothelial cell migration	271	20	0.0268505	KIRC
GO:0001954	BP	positive regulation of cell-matrix adhesion	56	7	0.0270524	KIRC
GO:0051174	BP	regulation of phosphorus metabolic process	1365	80	0.0271035	KIRC
GO:0032388	BP	positive regulation of intracellular transport	194	16	0.0271472	KIRC
GO:0072092	BP	ureteric bud invasion	3	2	0.0274914	KIRC
GO:0045834	BP	positive regulation of lipid metabolic process	154	14	0.0274982	KIRC
GO:0005220	MF	inositol 1,4,5-trisphosphate-sensitive calcium-release channel activity	3	2	0.0275568	KIRC
GO:0008191	MF	metalloendopeptidase inhibitor activity	16	3	0.0277686	KIRC
GO:0071396	BP	cellular response to lipid	591	37	0.0278305	KIRC
GO:0005925	CC	focal adhesion	419	32	0.0278512	KIRC
GO:0038166	BP	angiotensin-activated signaling pathway	14	3	0.0280317	KIRC
GO:0003092	BP	renal water retention	1	1	0.0280511	KIRC
GO:0005886	CC	plasma membrane	5278	257	0.0281415	KIRC
GO:0002525	BP	acute inflammatory response to non-antigenic stimulus	2	1	0.0282872	KIRC
GO:0002877	BP	regulation of acute inflammatory response to non-antigenic stimulus	2	1	0.0282872	KIRC
GO:0002879	BP	positive regulation of acute inflammatory response to non-antigenic stimulus	2	1	0.0282872	KIRC
GO:0015362	MF	high-affinity sodium:dicarboxylate symporter activity	1	1	0.0285577	KIRC
GO:0030971	MF	receptor tyrosine kinase binding	74	8	0.0290049	KIRC
GO:1903561	CC	extracellular vesicle	2151	104	0.0291737	KIRC
GO:0043230	CC	extracellular organelle	2152	104	0.0293851	KIRC
GO:0065010	CC	extracellular membrane-bounded organelle	2152	104	0.0293851	KIRC
GO:0031704	MF	apelin receptor binding	1	1	0.0294169	KIRC
GO:1904022	BP	positive regulation of G protein-coupled receptor internalization	1	1	0.0294169	KIRC
GO:0043292	CC	contractile fiber	238	19	0.0294274	KIRC
GO:0003015	BP	heart process	257	21	0.0294915	KIRC
GO:0006751	BP	glutathione catabolic process	6	2	0.029513	KIRC
GO:1990851	CC	Wnt-Frizzled-LRP5/6 complex	4	2	0.0295131	KIRC
GO:0046030	MF	inositol trisphosphate phosphatase activity	12	3	0.0295707	KIRC
GO:0004715	MF	non-membrane spanning protein tyrosine kinase activity	45	6	0.0298843	KIRC
GO:0051902	BP	negative regulation of mitochondrial depolarization	5	2	0.0299623	KIRC
GO:0000820	BP	regulation of glutamine family amino acid metabolic process	8	2	0.0299875	KIRC
GO:0045667	BP	regulation of osteoblast differentiation	139	13	0.0300334	KIRC
GO:1903115	BP	regulation of actin filament-based movement	40	6	0.0300607	KIRC
GO:0061134	MF	peptidase regulator activity	224	13	0.0301576	KIRC
GO:0002276	BP	basophil activation involved in immune response	2	1	0.0303823	KIRC
GO:0070062	CC	extracellular exosome	2080	102	0.0306047	KIRC
GO:0036493	BP	positive regulation of translation in response to endoplasmic reticulum stress	5	2	0.0307286	KIRC
GO:0061135	MF	endopeptidase regulator activity	186	11	0.0309075	KIRC
GO:0003137	BP	Notch signaling pathway involved in heart induction	4	2	0.0310391	KIRC
GO:0035480	BP	regulation of Notch signaling pathway involved in heart induction	4	2	0.0310391	KIRC
GO:0035481	BP	positive regulation of Notch signaling pathway involved in heart induction	4	2	0.0310391	KIRC
GO:0010632	BP	regulation of epithelial cell migration	283	21	0.0311919	KIRC
GO:0045785	BP	positive regulation of cell adhesion	476	33	0.0312356	KIRC
GO:0030139	CC	endocytic vesicle	332	23	0.0314132	KIRC
GO:0043267	BP	negative regulation of potassium ion transport	39	5	0.0314266	KIRC
GO:2000392	BP	regulation of lamellipodium morphogenesis	11	3	0.0314975	KIRC
GO:0030878	BP	thyroid gland development	28	5	0.0317455	KIRC
GO:0021783	BP	preganglionic parasympathetic fiber development	16	4	0.0320012	KIRC
GO:2001286	BP	regulation of caveolin-mediated endocytosis	6	2	0.0320047	KIRC
GO:0042813	MF	Wnt receptor activity	15	3	0.0320268	KIRC
GO:0007265	BP	Ras protein signal transduction	344	26	0.0320615	KIRC
GO:0021561	BP	facial nerve development	10	3	0.0321393	KIRC
GO:0021610	BP	facial nerve morphogenesis	10	3	0.0321393	KIRC
GO:0016878	MF	acid-thiol ligase activity	29	4	0.0321793	KIRC
GO:0033690	BP	positive regulation of osteoblast proliferation	13	3	0.0321889	KIRC
GO:0198738	BP	cell-cell signaling by wnt	449	35	0.0322174	KIRC
GO:0019932	BP	second-messenger-mediated signaling	306	23	0.0322371	KIRC
GO:0004441	MF	inositol-1,4-bisphosphate 1-phosphatase activity	1	1	0.0323496	KIRC
GO:0052829	MF	inositol-1,3,4-trisphosphate 1-phosphatase activity	1	1	0.0323496	KIRC
GO:0046174	BP	polyol catabolic process	27	4	0.0323673	KIRC
GO:1900729	BP	regulation of adenylate cyclase-inhibiting opioid receptor signaling pathway	1	1	0.0323766	KIRC
GO:1900731	BP	positive regulation of adenylate cyclase-inhibiting opioid receptor signaling pathway	1	1	0.0323766	KIRC
GO:2000476	BP	positive regulation of opioid receptor signaling pathway	1	1	0.0323766	KIRC
GO:1901701	BP	cellular response to oxygen-containing compound	1177	69	0.0323767	KIRC
GO:0032880	BP	regulation of protein localization	835	51	0.0323939	KIRC
GO:0005520	MF	insulin-like growth factor binding	19	4	0.0324082	KIRC
GO:0033688	BP	regulation of osteoblast proliferation	31	5	0.0324191	KIRC
GO:1900126	BP	negative regulation of hyaluronan biosynthetic process	4	2	0.0324256	KIRC
GO:0021604	BP	cranial nerve structural organization	10	3	0.0324601	KIRC
GO:0150117	BP	positive regulation of cell-substrate junction organization	31	5	0.0324962	KIRC
GO:0010939	BP	regulation of necrotic cell death	50	5	0.0326005	KIRC
GO:0019902	MF	phosphatase binding	194	16	0.0328897	KIRC
GO:0010951	BP	negative regulation of endopeptidase activity	241	14	0.0330099	KIRC
GO:0030177	BP	positive regulation of Wnt signaling pathway	143	14	0.0330531	KIRC
GO:0003779	MF	actin binding	431	34	0.0330551	KIRC
GO:0106261	MF	tRNA uridine(34) acetyltransferase activity	1	1	0.0332072	KIRC
GO:0060633	BP	negative regulation of transcription initiation by RNA polymerase II	5	2	0.0332966	KIRC
GO:0048634	BP	regulation of muscle organ development	22	4	0.0333822	KIRC
GO:0016167	MF	glial cell-derived neurotrophic factor receptor activity	5	2	0.0334747	KIRC
GO:0019915	BP	lipid storage	85	8	0.0336113	KIRC
GO:0045598	BP	regulation of fat cell differentiation	146	13	0.0336226	KIRC
GO:0009056	BP	catabolic process	2503	122	0.0337827	KIRC
GO:0030335	BP	positive regulation of cell migration	546	36	0.0339457	KIRC
GO:0015722	BP	canalicular bile acid transport	2	1	0.03395	KIRC
GO:0048298	BP	positive regulation of isotype switching to IgA isotypes	5	2	0.0339969	KIRC
GO:0072659	BP	protein localization to plasma membrane	281	22	0.0340023	KIRC
GO:0016768	MF	spermine synthase activity	1	1	0.0340252	KIRC
GO:2001251	BP	negative regulation of chromosome organization	94	8	0.034111	KIRC
GO:1905477	BP	positive regulation of protein localization to membrane	100	10	0.0346159	KIRC
GO:1902285	BP	semaphorin-plexin signaling pathway involved in neuron projection guidance	16	4	0.0346493	KIRC
GO:0001223	MF	transcription coactivator binding	40	6	0.0347179	KIRC
GO:0019220	BP	regulation of phosphate metabolic process	1364	79	0.0347987	KIRC
GO:1903076	BP	regulation of protein localization to plasma membrane	102	10	0.0349087	KIRC
GO:0002232	BP	leukocyte chemotaxis involved in inflammatory response	8	2	0.0350296	KIRC
GO:0061551	BP	trigeminal ganglion development	4	2	0.0350711	KIRC
GO:0005887	CC	integral component of plasma membrane	1626	87	0.0351318	KIRC
GO:1904180	BP	negative regulation of membrane depolarization	6	2	0.0352235	KIRC
GO:0004794	MF	L-threonine ammonia-lyase activity	2	1	0.0352576	KIRC
GO:0005587	CC	collagen type IV trimer	7	2	0.0353543	KIRC
GO:0001676	BP	long-chain fatty acid metabolic process	103	8	0.0354597	KIRC
GO:0050919	BP	negative chemotaxis	47	7	0.0357605	KIRC
GO:0072077	BP	renal vesicle morphogenesis	18	4	0.0358352	KIRC
GO:1901552	BP	positive regulation of endothelial cell development	6	2	0.0359776	KIRC
GO:1903142	BP	positive regulation of establishment of endothelial barrier	6	2	0.0359776	KIRC
GO:0010033	BP	response to organic substance	3005	154	0.0364252	KIRC
GO:0090257	BP	regulation of muscle system process	253	19	0.0364265	KIRC
GO:0007160	BP	cell-matrix adhesion	236	20	0.0365138	KIRC
GO:0150073	BP	regulation of protein-glutamine gamma-glutamyltransferase activity	2	1	0.0365704	KIRC
GO:0150074	BP	positive regulation of protein-glutamine gamma-glutamyltransferase activity	2	1	0.0365704	KIRC
GO:0030017	CC	sarcomere	210	17	0.0366636	KIRC
GO:0015141	MF	succinate transmembrane transporter activity	8	2	0.0367402	KIRC
GO:0015744	BP	succinate transport	8	2	0.0367402	KIRC
GO:0071422	BP	succinate transmembrane transport	8	2	0.0367402	KIRC
GO:0008957	MF	phenylacetaldehyde dehydrogenase activity	1	1	0.0367731	KIRC
GO:0016663	MF	oxidoreductase activity, acting on other nitrogenous compounds as donors, oxygen as acceptor	1	1	0.0367731	KIRC
GO:0018547	MF	nitroglycerin reductase activity	1	1	0.0367731	KIRC
GO:1905627	BP	regulation of serotonin biosynthetic process	1	1	0.0367731	KIRC
GO:0030055	CC	cell-substrate junction	429	32	0.0367771	KIRC
GO:0051495	BP	positive regulation of cytoskeleton organization	194	16	0.0369941	KIRC
GO:0070723	BP	response to cholesterol	28	4	0.0371659	KIRC
GO:0043131	BP	erythrocyte enucleation	1	1	0.037185	KIRC
GO:0043354	BP	enucleate erythrocyte maturation	1	1	0.037185	KIRC
GO:0061930	BP	regulation of erythrocyte enucleation	1	1	0.037185	KIRC
GO:0061931	BP	positive regulation of erythrocyte enucleation	1	1	0.037185	KIRC
GO:0090601	BP	enucleation	1	1	0.037185	KIRC
GO:1902838	BP	regulation of nuclear migration along microtubule	1	1	0.037185	KIRC
GO:0046579	BP	positive regulation of Ras protein signal transduction	60	7	0.0372051	KIRC
GO:0070508	BP	cholesterol import	9	2	0.0372834	KIRC
GO:1900210	BP	positive regulation of cardiolipin metabolic process	2	1	0.0373935	KIRC
GO:0021636	BP	trigeminal nerve morphogenesis	4	2	0.0374765	KIRC
GO:0021637	BP	trigeminal nerve structural organization	4	2	0.0374765	KIRC
GO:0005044	MF	scavenger receptor activity	43	5	0.0375402	KIRC
GO:0004857	MF	enzyme inhibitor activity	382	22	0.0375642	KIRC
GO:0003337	BP	mesenchymal to epithelial transition involved in metanephros morphogenesis	12	3	0.0376423	KIRC
GO:1905956	BP	positive regulation of endothelial tube morphogenesis	1	1	0.0378188	KIRC
GO:0098862	CC	cluster of actin-based cell projections	154	13	0.0378518	KIRC
GO:2000147	BP	positive regulation of cell motility	571	37	0.0381954	KIRC
GO:0051128	BP	regulation of cellular component organization	2322	132	0.0382512	KIRC
GO:0030325	BP	adrenal gland development	27	5	0.0384187	KIRC
GO:0005986	BP	sucrose biosynthetic process	2	1	0.0384637	KIRC
GO:0042132	MF	fructose 1,6-bisphosphate 1-phosphatase activity	2	1	0.0384637	KIRC
GO:1904294	BP	positive regulation of ERAD pathway	14	3	0.0385213	KIRC
GO:0030215	MF	semaphorin receptor binding	23	4	0.0385295	KIRC
GO:0002373	BP	plasmacytoid dendritic cell cytokine production	2	1	0.038686	KIRC
GO:0030473	BP	nuclear migration along microtubule	4	2	0.0387151	KIRC
GO:0072073	BP	kidney epithelium development	144	15	0.0388028	KIRC
GO:0043647	BP	inositol phosphate metabolic process	55	6	0.0389064	KIRC
GO:0004349	MF	glutamate 5-kinase activity	1	1	0.0389088	KIRC
GO:0004350	MF	glutamate-5-semialdehyde dehydrogenase activity	1	1	0.0389088	KIRC
GO:0006592	BP	ornithine biosynthetic process	1	1	0.0389088	KIRC
GO:0045518	MF	interleukin-22 receptor binding	2	1	0.0389223	KIRC
GO:0009117	BP	nucleotide metabolic process	573	32	0.0389585	KIRC
GO:0002358	BP	B cell homeostatic proliferation	2	1	0.0390339	KIRC
GO:0015265	MF	urea channel activity	2	1	0.0390426	KIRC
GO:0042392	MF	sphingosine-1-phosphate phosphatase activity	7	2	0.0390746	KIRC
GO:0003012	BP	muscle system process	450	31	0.0391718	KIRC
GO:0019856	BP	pyrimidine nucleobase biosynthetic process	8	2	0.0392786	KIRC
GO:0030282	BP	bone mineralization	122	12	0.0392816	KIRC
GO:0009888	BP	tissue development	1950	115	0.039284	KIRC
GO:2000143	BP	negative regulation of DNA-templated transcription initiation	6	2	0.0394203	KIRC
GO:0045575	BP	basophil activation	3	1	0.0398672	KIRC
GO:2000826	BP	regulation of heart morphogenesis	11	3	0.0399682	KIRC
GO:0002352	BP	B cell negative selection	2	1	0.0400423	KIRC
GO:0097145	CC	BAK complex	2	1	0.0400423	KIRC
GO:0032983	CC	kainate selective glutamate receptor complex	4	2	0.0401461	KIRC
GO:0004198	MF	calcium-dependent cysteine-type endopeptidase activity	16	3	0.0401555	KIRC
GO:0048483	BP	autonomic nervous system development	48	7	0.0403077	KIRC
GO:0044853	CC	plasma membrane raft	113	11	0.040417	KIRC
GO:0007015	BP	actin filament organization	442	33	0.0404536	KIRC
GO:0120192	BP	tight junction assembly	72	7	0.0404553	KIRC
GO:1901509	BP	regulation of endothelial tube morphogenesis	6	2	0.0404796	KIRC
GO:0005829	CC	cytosol	5263	250	0.0407754	KIRC
GO:0040008	BP	regulation of growth	611	42	0.0408469	KIRC
GO:0001503	BP	ossification	423	31	0.0409009	KIRC
GO:1903862	BP	positive regulation of oxidative phosphorylation	2	1	0.0409665	KIRC
GO:0005902	CC	microvillus	93	9	0.0409841	KIRC
GO:0030165	MF	PDZ domain binding	82	9	0.0410255	KIRC
GO:0000290	BP	deadenylation-dependent decapping of nuclear-transcribed mRNA	10	2	0.0410363	KIRC
GO:0046470	BP	phosphatidylcholine metabolic process	77	7	0.0410509	KIRC
GO:2000641	BP	regulation of early endosome to late endosome transport	18	3	0.041362	KIRC
GO:0052659	MF	inositol-1,3,4,5-tetrakisphosphate 5-phosphatase activity	6	2	0.0413665	KIRC
GO:0048296	BP	regulation of isotype switching to IgA isotypes	6	2	0.0415055	KIRC
GO:0140374	BP	antiviral innate immune response	22	3	0.0415664	KIRC
GO:0051480	BP	regulation of cytosolic calcium ion concentration	52	6	0.0416363	KIRC
GO:0004458	MF	D-lactate dehydrogenase (cytochrome) activity	1	1	0.041683	KIRC
GO:0008720	MF	D-lactate dehydrogenase activity	1	1	0.041683	KIRC
GO:0016898	MF	oxidoreductase activity, acting on the CH-OH group of donors, cytochrome as acceptor	1	1	0.041683	KIRC
GO:1903457	BP	lactate catabolic process	1	1	0.041683	KIRC
GO:0016312	MF	inositol bisphosphate phosphatase activity	5	2	0.0417687	KIRC
GO:0019265	BP	glycine biosynthetic process, by transamination of glyoxylate	2	1	0.0418926	KIRC
GO:0061550	BP	cranial ganglion development	5	2	0.042027	KIRC
GO:0072657	BP	protein localization to membrane	567	36	0.0420466	KIRC
GO:0038129	BP	ERBB3 signaling pathway	5	2	0.0422301	KIRC
GO:0036492	BP	eiF2alpha phosphorylation in response to endoplasmic reticulum stress	7	2	0.0422864	KIRC
GO:0010677	BP	negative regulation of cellular carbohydrate metabolic process	44	5	0.0423546	KIRC
GO:0004423	MF	iduronate-2-sulfatase activity	1	1	0.0424519	KIRC
GO:1901861	BP	regulation of muscle tissue development	46	6	0.0424859	KIRC
GO:0016900	MF	oxidoreductase activity, acting on the CH-OH group of donors, disulfide as acceptor	2	1	0.0425665	KIRC
GO:0047057	MF	vitamin-K-epoxide reductase (warfarin-sensitive) activity	2	1	0.0425665	KIRC
GO:1990782	MF	protein tyrosine kinase binding	112	10	0.0426111	KIRC
GO:0098642	CC	network-forming collagen trimer	9	2	0.042918	KIRC
GO:0098645	CC	collagen network	9	2	0.042918	KIRC
GO:0010466	BP	negative regulation of peptidase activity	252	14	0.0432865	KIRC
GO:0051020	MF	GTPase binding	301	22	0.043377	KIRC
GO:0015645	MF	fatty acid ligase activity	20	3	0.0433914	KIRC
GO:1900024	BP	regulation of substrate adhesion-dependent cell spreading	59	7	0.0435743	KIRC
GO:0043651	BP	linoleic acid metabolic process	19	3	0.0438838	KIRC
GO:0006753	BP	nucleoside phosphate metabolic process	581	32	0.044016	KIRC
GO:0072087	BP	renal vesicle development	19	4	0.044096	KIRC
GO:0045216	BP	cell-cell junction organization	203	17	0.0441281	KIRC
GO:0033301	BP	cell cycle comprising mitosis without cytokinesis	1	1	0.0441603	KIRC
GO:0032489	BP	regulation of Cdc42 protein signal transduction	8	2	0.0442656	KIRC
GO:0004946	MF	bombesin receptor activity	2	1	0.0443303	KIRC
GO:0031989	BP	bombesin receptor signaling pathway	2	1	0.0443303	KIRC
GO:0010656	BP	negative regulation of muscle cell apoptotic process	53	6	0.0445083	KIRC
GO:0048712	BP	negative regulation of astrocyte differentiation	15	3	0.0448891	KIRC
GO:0046538	MF	2,3-bisphosphoglycerate-dependent phosphoglycerate mutase activity	2	1	0.0451181	KIRC
GO:1902532	BP	negative regulation of intracellular signal transduction	535	33	0.0453582	KIRC
GO:0016055	BP	Wnt signaling pathway	447	34	0.0454997	KIRC
GO:0051668	BP	localization within membrane	656	41	0.0455866	KIRC
GO:0062013	BP	positive regulation of small molecule metabolic process	149	12	0.0458011	KIRC
GO:0006096	BP	glycolytic process	82	8	0.0458085	KIRC
GO:0046822	BP	regulation of nucleocytoplasmic transport	108	9	0.0460028	KIRC
GO:0030155	BP	regulation of cell adhesion	784	50	0.0462494	KIRC
GO:0140739	BP	NLRP6 inflammasome complex assembly	1	1	0.0462744	KIRC
GO:0042307	BP	positive regulation of protein import into nucleus	40	5	0.0463059	KIRC
GO:0048741	BP	skeletal muscle fiber development	38	5	0.0463078	KIRC
GO:0014897	BP	striated muscle hypertrophy	102	9	0.0463748	KIRC
GO:0032471	BP	negative regulation of endoplasmic reticulum calcium ion concentration	8	2	0.0464451	KIRC
GO:0048041	BP	focal adhesion assembly	85	10	0.0466088	KIRC
GO:0050999	BP	regulation of nitric-oxide synthase activity	40	5	0.0466286	KIRC
GO:0046395	BP	carboxylic acid catabolic process	241	15	0.0466739	KIRC
GO:0045940	BP	positive regulation of steroid metabolic process	30	4	0.0469416	KIRC
GO:0072750	BP	cellular response to leptomycin B	1	1	0.0471016	KIRC
GO:1901344	BP	response to leptomycin B	1	1	0.0471016	KIRC
GO:1901707	MF	leptomycin B binding	1	1	0.0471016	KIRC
GO:0071397	BP	cellular response to cholesterol	18	3	0.0473097	KIRC
GO:1901380	BP	negative regulation of potassium ion transmembrane transport	32	4	0.0474154	KIRC
GO:0002376	BP	immune system process	2456	118	0.0474286	KIRC
GO:2001171	BP	positive regulation of ATP biosynthetic process	12	2	0.0476786	KIRC
GO:0043184	MF	vascular endothelial growth factor receptor 2 binding	9	2	0.047689	KIRC
GO:0044854	BP	plasma membrane raft assembly	7	2	0.0477999	KIRC
GO:0036491	BP	regulation of translation initiation in response to endoplasmic reticulum stress	8	2	0.0479393	KIRC
GO:0045780	BP	positive regulation of bone resorption	18	3	0.0479494	KIRC
GO:0048486	BP	parasympathetic nervous system development	18	4	0.0480547	KIRC
GO:0015277	MF	kainate selective glutamate receptor activity	5	2	0.0480801	KIRC
GO:0032960	BP	regulation of inositol trisphosphate biosynthetic process	6	2	0.0482047	KIRC
GO:0002192	BP	IRES-dependent translational initiation of linear mRNA	1	1	0.0482198	KIRC
GO:0110017	BP	cap-independent translational initiation of linear mRNA	1	1	0.0482198	KIRC
GO:0019955	MF	cytokine binding	135	10	0.0482876	KIRC
GO:1904892	BP	regulation of receptor signaling pathway via STAT	95	8	0.0482909	KIRC
GO:0031267	MF	small GTPase binding	270	20	0.0483816	KIRC
GO:0030213	BP	hyaluronan biosynthetic process	14	3	0.0484528	KIRC
GO:0006757	BP	ATP generation from ADP	83	8	0.0485024	KIRC
GO:1902903	BP	regulation of supramolecular fiber organization	373	27	0.0485841	KIRC
GO:0043456	BP	regulation of pentose-phosphate shunt	6	2	0.0486004	KIRC
GO:0060612	BP	adipose tissue development	52	6	0.0486083	KIRC
GO:0004713	MF	protein tyrosine kinase activity	138	14	0.0486775	KIRC
GO:0110053	BP	regulation of actin filament organization	269	21	0.0486989	KIRC
GO:0043649	BP	dicarboxylic acid catabolic process	18	3	0.0488269	KIRC
GO:0070161	CC	anchoring junction	1313	85	0.0488784	KIRC
GO:0016791	MF	phosphatase activity	272	19	0.0489031	KIRC
GO:0005884	CC	actin filament	113	11	0.0489673	KIRC
GO:0019911	MF	structural constituent of myelin sheath	9	2	0.0490603	KIRC
GO:1902010	BP	negative regulation of translation in response to endoplasmic reticulum stress	1	1	0.0490694	KIRC
GO:0052658	MF	inositol-1,4,5-trisphosphate 5-phosphatase activity	7	2	0.049089	KIRC
GO:0008445	MF	D-aspartate oxidase activity	1	1	0.0492296	KIRC
GO:0099604	MF	ligand-gated calcium channel activity	26	5	0.0492525	KIRC
GO:0060183	BP	apelin receptor signaling pathway	2	1	0.0493109	KIRC
GO:0140801	MF	histone kinase activity (H2A-Y142 specific)	1	1	0.0493282	KIRC
GO:0033687	BP	osteoblast proliferation	36	5	0.0494632	KIRC
GO:0051056	BP	regulation of small GTPase mediated signal transduction	294	24	0.0495471	KIRC
GO:0001572	BP	lactosylceramide biosynthetic process	2	1	0.0497819	KIRC
GO:0046478	BP	lactosylceramide metabolic process	2	1	0.0497819	KIRC
GO:0001657	BP	ureteric bud development	96	11	0.049787	KIRC
GO:0021785	BP	branchiomotor neuron axon guidance	5	2	0.0499094	KIRC

## Sheet: KIRP
ID	ONTOLOGY	TERM	N	DE	P.DE	Cancer
GO:0007264	BP	small GTPase mediated signal transduction	492	112	3.02995e-07	KIRP
GO:0030036	BP	actin cytoskeleton organization	715	150	1.28628e-05	KIRP
GO:0030029	BP	actin filament-based process	804	161	7.98979e-05	KIRP
GO:0043087	BP	regulation of GTPase activity	350	80	8.38042e-05	KIRP
GO:0006996	BP	organelle organization	3450	480	0.000146359	KIRP
GO:0007265	BP	Ras protein signal transduction	344	74	0.000150185	KIRP
GO:1902905	BP	positive regulation of supramolecular fiber organization	175	44	0.000165364	KIRP
GO:0090162	BP	establishment of epithelial cell polarity	34	15	0.000168708	KIRP
GO:0007010	BP	cytoskeleton organization	1468	246	0.000198188	KIRP
GO:0043547	BP	positive regulation of GTPase activity	260	60	0.000288003	KIRP
GO:0035556	BP	intracellular signal transduction	2605	397	0.000288937	KIRP
GO:1902903	BP	regulation of supramolecular fiber organization	373	78	0.000292265	KIRP
GO:0022604	BP	regulation of cell morphogenesis	307	70	0.000304837	KIRP
GO:0048525	BP	negative regulation of viral process	89	21	0.000357111	KIRP
GO:1903900	BP	regulation of viral life cycle	140	29	0.000392489	KIRP
GO:0051495	BP	positive regulation of cytoskeleton organization	194	45	0.000428448	KIRP
GO:0110053	BP	regulation of actin filament organization	269	60	0.00043861	KIRP
GO:0044409	BP	entry into host	151	34	0.000485479	KIRP
GO:0051056	BP	regulation of small GTPase mediated signal transduction	294	68	0.000500974	KIRP
GO:0007015	BP	actin filament organization	442	92	0.000543051	KIRP
GO:0050790	BP	regulation of catalytic activity	2276	344	0.000563867	KIRP
GO:0007266	BP	Rho protein signal transduction	138	34	0.000806595	KIRP
GO:0046718	BP	viral entry into host cell	144	32	0.000843419	KIRP
GO:0044403	BP	biological process involved in symbiotic interaction	289	51	0.000843566	KIRP
GO:0010631	BP	epithelial cell migration	356	68	0.00110939	KIRP
GO:0090130	BP	tissue migration	363	69	0.00118851	KIRP
GO:0051493	BP	regulation of cytoskeleton organization	524	98	0.00125936	KIRP
GO:0019058	BP	viral life cycle	308	55	0.00128918	KIRP
GO:0090132	BP	epithelium migration	358	68	0.00135363	KIRP
GO:0051496	BP	positive regulation of stress fiber assembly	52	17	0.00137182	KIRP
GO:1902531	BP	regulation of intracellular signal transduction	1717	266	0.00142165	KIRP
GO:0032233	BP	positive regulation of actin filament bundle assembly	62	19	0.00142518	KIRP
GO:0044000	BP	movement in host	174	36	0.00164656	KIRP
GO:0120193	BP	tight junction organization	78	20	0.00164713	KIRP
GO:0032231	BP	regulation of actin filament bundle assembly	107	29	0.00170143	KIRP
GO:0003415	BP	chondrocyte hypertrophy	6	5	0.0017575	KIRP
GO:0010761	BP	fibroblast migration	55	18	0.00176951	KIRP
GO:0097435	BP	supramolecular fiber organization	794	140	0.00199602	KIRP
GO:0030038	BP	contractile actin filament bundle assembly	108	29	0.00204324	KIRP
GO:0043149	BP	stress fiber assembly	108	29	0.00204324	KIRP
GO:0051701	BP	biological process involved in interaction with host	193	38	0.00211488	KIRP
GO:0030155	BP	regulation of cell adhesion	783	137	0.00253112	KIRP
GO:0030010	BP	establishment of cell polarity	150	38	0.00267421	KIRP
GO:0051017	BP	actin filament bundle assembly	159	40	0.00268915	KIRP
GO:0051492	BP	regulation of stress fiber assembly	93	25	0.00279691	KIRP
GO:0014888	BP	striated muscle adaptation	55	15	0.0028389	KIRP
GO:0050792	BP	regulation of viral process	160	29	0.00292288	KIRP
GO:0001667	BP	ameboidal-type cell migration	481	89	0.00295871	KIRP
GO:0150172	BP	regulation of phosphatidylcholine metabolic process	10	6	0.00323217	KIRP
GO:0022603	BP	regulation of anatomical structure morphogenesis	968	174	0.00351186	KIRP
GO:0046578	BP	regulation of Ras protein signal transduction	186	43	0.00359487	KIRP
GO:0070317	BP	negative regulation of G0 to G1 transition	7	4	0.00376006	KIRP
GO:0010632	BP	regulation of epithelial cell migration	283	54	0.00386222	KIRP
GO:0008360	BP	regulation of cell shape	154	36	0.00389689	KIRP
GO:0150173	BP	positive regulation of phosphatidylcholine metabolic process	3	3	0.00410145	KIRP
GO:2001247	BP	positive regulation of phosphatidylcholine biosynthetic process	3	3	0.00410145	KIRP
GO:0007155	BP	cell adhesion	1503	242	0.00421939	KIRP
GO:0061572	BP	actin filament bundle organization	162	40	0.00425516	KIRP
GO:0042116	BP	macrophage activation	109	23	0.00430891	KIRP
GO:0090051	BP	negative regulation of cell migration involved in sprouting angiogenesis	38	9	0.00480425	KIRP
GO:0032570	BP	response to progesterone	38	13	0.00500739	KIRP
GO:0045071	BP	negative regulation of viral genome replication	56	12	0.00505328	KIRP
GO:0033043	BP	regulation of organelle organization	1159	178	0.00508669	KIRP
GO:0120031	BP	plasma membrane bounded cell projection assembly	553	92	0.00524495	KIRP
GO:0052372	BP	modulation by symbiont of entry into host	52	13	0.00542902	KIRP
GO:0051336	BP	regulation of hydrolase activity	981	151	0.00543617	KIRP
GO:0070830	BP	bicellular tight junction assembly	66	16	0.00549798	KIRP
GO:0030838	BP	positive regulation of actin filament polymerization	52	15	0.00574437	KIRP
GO:0061298	BP	retina vasculature development in camera-type eye	19	8	0.00574757	KIRP
GO:0031589	BP	cell-substrate adhesion	363	74	0.00581866	KIRP
GO:0032633	BP	interleukin-4 production	35	10	0.00582498	KIRP
GO:0032673	BP	regulation of interleukin-4 production	35	10	0.00582498	KIRP
GO:0051647	BP	nucleus localization	28	11	0.00643033	KIRP
GO:0048702	BP	embryonic neurocranium morphogenesis	9	5	0.00661995	KIRP
GO:0010638	BP	positive regulation of organelle organization	502	83	0.00664455	KIRP
GO:2000098	BP	negative regulation of smooth muscle cell-matrix adhesion	2	2	0.00665313	KIRP
GO:0006083	BP	acetate metabolic process	2	2	0.00668876	KIRP
GO:0019427	BP	acetyl-CoA biosynthetic process from acetate	2	2	0.00668876	KIRP
GO:0010633	BP	negative regulation of epithelial cell migration	107	21	0.0068871	KIRP
GO:1902533	BP	positive regulation of intracellular signal transduction	991	154	0.00708132	KIRP
GO:0007049	BP	cell cycle	1769	247	0.00742152	KIRP
GO:0032956	BP	regulation of actin cytoskeleton organization	354	68	0.00748016	KIRP
GO:0110020	BP	regulation of actomyosin structure organization	103	25	0.00754676	KIRP
GO:0003186	BP	tricuspid valve morphogenesis	5	4	0.00811946	KIRP
GO:0043500	BP	muscle adaptation	122	25	0.00827597	KIRP
GO:0003430	BP	growth plate cartilage chondrocyte growth	3	3	0.00862603	KIRP
GO:0018107	BP	peptidyl-threonine phosphorylation	110	27	0.00864457	KIRP
GO:0044087	BP	regulation of cellular component biogenesis	938	157	0.00869339	KIRP
GO:0030031	BP	cell projection assembly	564	92	0.0087305	KIRP
GO:0046596	BP	regulation of viral entry into host cell	45	11	0.00895798	KIRP
GO:0072050	BP	S-shaped body morphogenesis	8	5	0.00905282	KIRP
GO:0046889	BP	positive regulation of lipid biosynthetic process	88	20	0.00926924	KIRP
GO:0010762	BP	regulation of fibroblast migration	40	13	0.00938992	KIRP
GO:0048010	BP	vascular endothelial growth factor receptor signaling pathway	58	16	0.00946409	KIRP
GO:0010763	BP	positive regulation of fibroblast migration	17	8	0.00947912	KIRP
GO:0110057	BP	regulation of blood vessel endothelial cell differentiation	3	2	0.00948161	KIRP
GO:2000181	BP	negative regulation of blood vessel morphogenesis	145	25	0.00962255	KIRP
GO:1901343	BP	negative regulation of vasculature development	146	25	0.00992468	KIRP
GO:0043903	BP	regulation of biological process involved in symbiotic interaction	58	13	0.010185	KIRP
GO:0010812	BP	negative regulation of cell-substrate adhesion	64	18	0.0105393	KIRP
GO:0051895	BP	negative regulation of focal adhesion assembly	17	8	0.0107016	KIRP
GO:0150118	BP	negative regulation of cell-substrate junction organization	17	8	0.0107016	KIRP
GO:0030947	BP	regulation of vascular endothelial growth factor receptor signaling pathway	33	10	0.0107269	KIRP
GO:0071393	BP	cellular response to progesterone stimulus	5	4	0.0108152	KIRP
GO:0072273	BP	metanephric nephron morphogenesis	25	10	0.0108879	KIRP
GO:0043009	BP	chordate embryonic development	650	119	0.0109492	KIRP
GO:2000651	BP	positive regulation of sodium ion transmembrane transporter activity	17	7	0.0112516	KIRP
GO:0032753	BP	positive regulation of interleukin-4 production	27	8	0.0114415	KIRP
GO:0006308	BP	DNA catabolic process	31	8	0.0117318	KIRP
GO:0065009	BP	regulation of molecular function	2996	425	0.0118453	KIRP
GO:0031032	BP	actomyosin structure organization	202	43	0.0124187	KIRP
GO:0006338	BP	chromatin remodeling	346	55	0.0126156	KIRP
GO:0045785	BP	positive regulation of cell adhesion	475	83	0.0127391	KIRP
GO:0045218	BP	zonula adherens maintenance	3	3	0.0128144	KIRP
GO:0007163	BP	establishment or maintenance of cell polarity	234	49	0.0129858	KIRP
GO:0120034	BP	positive regulation of plasma membrane bounded cell projection assembly	110	24	0.0137247	KIRP
GO:0018210	BP	peptidyl-threonine modification	119	28	0.0137416	KIRP
GO:0051345	BP	positive regulation of hydrolase activity	563	94	0.0137564	KIRP
GO:0043542	BP	endothelial cell migration	271	48	0.0138521	KIRP
GO:0008064	BP	regulation of actin polymerization or depolymerization	154	32	0.0141934	KIRP
GO:1903525	BP	regulation of membrane tubulation	6	4	0.0142317	KIRP
GO:0032970	BP	regulation of actin filament-based process	395	74	0.0142476	KIRP
GO:0016525	BP	negative regulation of angiogenesis	143	24	0.0142555	KIRP
GO:0045955	BP	negative regulation of calcium ion-dependent exocytosis	8	4	0.0143568	KIRP
GO:0016032	BP	viral process	406	64	0.0145502	KIRP
GO:0009792	BP	embryo development ending in birth or egg hatching	672	121	0.0145772	KIRP
GO:0097320	BP	plasma membrane tubulation	20	7	0.0146001	KIRP
GO:0120192	BP	tight junction assembly	72	16	0.0146709	KIRP
GO:0031641	BP	regulation of myelination	48	14	0.0147197	KIRP
GO:0002456	BP	T cell mediated immunity	104	19	0.014805	KIRP
GO:0033869	BP	nucleoside bisphosphate catabolic process	11	4	0.0148082	KIRP
GO:0034031	BP	ribonucleoside bisphosphate catabolic process	11	4	0.0148082	KIRP
GO:0034034	BP	purine nucleoside bisphosphate catabolic process	11	4	0.0148082	KIRP
GO:0002281	BP	macrophage activation involved in immune response	19	6	0.0149389	KIRP
GO:0030261	BP	chromosome condensation	49	11	0.0149984	KIRP
GO:0002369	BP	T cell cytokine production	35	9	0.0152191	KIRP
GO:0002724	BP	regulation of T cell cytokine production	35	9	0.0152191	KIRP
GO:0007097	BP	nuclear migration	24	9	0.0154452	KIRP
GO:0097681	BP	double-strand break repair via alternative nonhomologous end joining	5	3	0.0157196	KIRP
GO:1901342	BP	regulation of vasculature development	345	56	0.0157375	KIRP
GO:0030041	BP	actin filament polymerization	166	34	0.015896	KIRP
GO:0005996	BP	monosaccharide metabolic process	244	44	0.0159872	KIRP
GO:0072049	BP	comma-shaped body morphogenesis	6	4	0.0160026	KIRP
GO:0045638	BP	negative regulation of myeloid cell differentiation	92	20	0.0163422	KIRP
GO:0014904	BP	myotube cell development	42	12	0.0163912	KIRP
GO:0070164	BP	negative regulation of adiponectin secretion	4	3	0.0166336	KIRP
GO:0048741	BP	skeletal muscle fiber development	38	11	0.0168009	KIRP
GO:0006006	BP	glucose metabolic process	186	35	0.0170031	KIRP
GO:0003175	BP	tricuspid valve development	6	4	0.0170708	KIRP
GO:0030948	BP	negative regulation of vascular endothelial growth factor receptor signaling pathway	12	5	0.0175988	KIRP
GO:0008154	BP	actin polymerization or depolymerization	195	39	0.0176325	KIRP
GO:0043537	BP	negative regulation of blood vessel endothelial cell migration	72	13	0.0177218	KIRP
GO:0009966	BP	regulation of signal transduction	2961	434	0.0177273	KIRP
GO:0007041	BP	lysosomal transport	125	25	0.0178699	KIRP
GO:0045765	BP	regulation of angiogenesis	339	55	0.0180457	KIRP
GO:0034162	BP	toll-like receptor 9 signaling pathway	18	6	0.0181251	KIRP
GO:0043507	BP	positive regulation of JUN kinase activity	43	12	0.0181586	KIRP
GO:0072284	BP	metanephric S-shaped body morphogenesis	6	4	0.0183548	KIRP
GO:0097278	BP	complement-dependent cytotoxicity	10	4	0.018384	KIRP
GO:0061304	BP	retinal blood vessel morphogenesis	6	4	0.0183959	KIRP
GO:0030099	BP	myeloid cell differentiation	403	68	0.0183995	KIRP
GO:0030832	BP	regulation of actin filament length	157	32	0.0184637	KIRP
GO:0032963	BP	collagen metabolic process	105	21	0.0187094	KIRP
GO:0019318	BP	hexose metabolic process	227	41	0.0189254	KIRP
GO:0007492	BP	endoderm development	82	21	0.0196158	KIRP
GO:0003338	BP	metanephros morphogenesis	31	11	0.0196256	KIRP
GO:0071476	BP	cellular hypotonic response	10	5	0.0196466	KIRP
GO:0043501	BP	skeletal muscle adaptation	25	7	0.0197544	KIRP
GO:1990262	BP	anti-Mullerian hormone signaling pathway	2	2	0.0199862	KIRP
GO:0090049	BP	regulation of cell migration involved in sprouting angiogenesis	72	13	0.0203335	KIRP
GO:0051127	BP	positive regulation of actin nucleation	16	6	0.0204129	KIRP
GO:0002706	BP	regulation of lymphocyte mediated immunity	167	26	0.0207156	KIRP
GO:0001843	BP	neural tube closure	92	23	0.0208217	KIRP
GO:0010595	BP	positive regulation of endothelial cell migration	127	26	0.0208738	KIRP
GO:0006476	BP	protein deacetylation	121	25	0.020878	KIRP
GO:0045198	BP	establishment of epithelial cell apical/basal polarity	17	6	0.0208949	KIRP
GO:0098732	BP	macromolecule deacylation	136	27	0.0209171	KIRP
GO:0002920	BP	regulation of humoral immune response	44	9	0.020929	KIRP
GO:0051128	BP	regulation of cellular component organization	2322	351	0.0209348	KIRP
GO:0006654	BP	phosphatidic acid biosynthetic process	31	10	0.0210249	KIRP
GO:0035148	BP	tube formation	155	35	0.021067	KIRP
GO:0007431	BP	salivary gland development	34	11	0.021355	KIRP
GO:0097065	BP	anterior head development	7	4	0.0215093	KIRP
GO:0015942	BP	formate metabolic process	6	3	0.0216795	KIRP
GO:0032603	BP	fractalkine production	2	2	0.0221295	KIRP
GO:0032644	BP	regulation of fractalkine production	2	2	0.0221295	KIRP
GO:0032724	BP	positive regulation of fractalkine production	2	2	0.0221295	KIRP
GO:2000064	BP	regulation of cortisol biosynthetic process	7	4	0.0221878	KIRP
GO:0045742	BP	positive regulation of epidermal growth factor receptor signaling pathway	36	9	0.0222534	KIRP
GO:0050882	BP	voluntary musculoskeletal movement	7	4	0.0224211	KIRP
GO:0060606	BP	tube closure	93	23	0.0224326	KIRP
GO:0030833	BP	regulation of actin filament polymerization	136	28	0.022568	KIRP
GO:0002761	BP	regulation of myeloid leukocyte differentiation	122	24	0.0225872	KIRP
GO:0006959	BP	humoral immune response	211	27	0.0226436	KIRP
GO:0043297	BP	apical junction assembly	74	16	0.0226915	KIRP
GO:1903659	BP	regulation of complement-dependent cytotoxicity	8	3	0.0230022	KIRP
GO:0006003	BP	fructose 2,6-bisphosphate metabolic process	5	3	0.0230685	KIRP
GO:1902894	BP	negative regulation of miRNA transcription	19	7	0.0230878	KIRP
GO:0048022	BP	negative regulation of melanin biosynthetic process	5	3	0.0231818	KIRP
GO:1900377	BP	negative regulation of secondary metabolite biosynthetic process	5	3	0.0231818	KIRP
GO:0090215	BP	regulation of 1-phosphatidylinositol-4-phosphate 5-kinase activity	4	3	0.0231831	KIRP
GO:0010634	BP	positive regulation of epithelial cell migration	172	34	0.0233673	KIRP
GO:0009967	BP	positive regulation of signal transduction	1524	228	0.0234697	KIRP
GO:0002885	BP	positive regulation of hypersensitivity	5	3	0.023518	KIRP
GO:1905457	BP	negative regulation of lymphoid progenitor cell differentiation	4	3	0.0237729	KIRP
GO:1905203	BP	regulation of connective tissue replacement	13	4	0.0238203	KIRP
GO:0071073	BP	positive regulation of phospholipid biosynthetic process	10	4	0.0239167	KIRP
GO:0045019	BP	negative regulation of nitric oxide biosynthetic process	17	5	0.0240834	KIRP
GO:1904406	BP	negative regulation of nitric oxide metabolic process	17	5	0.0240834	KIRP
GO:0009790	BP	embryo development	1119	191	0.0242897	KIRP
GO:0046835	BP	carbohydrate phosphorylation	25	8	0.0243724	KIRP
GO:0097692	BP	histone H3-K4 monomethylation	8	4	0.0244431	KIRP
GO:0014873	BP	response to muscle activity involved in regulation of muscle adaptation	4	2	0.0247354	KIRP
GO:0048583	BP	regulation of response to stimulus	3899	538	0.0248618	KIRP
GO:0010799	BP	regulation of peptidyl-threonine phosphorylation	45	12	0.0251532	KIRP
GO:1903358	BP	regulation of Golgi organization	17	6	0.0255549	KIRP
GO:0034138	BP	toll-like receptor 3 signaling pathway	18	6	0.0257491	KIRP
GO:0061086	BP	negative regulation of histone H3-K27 methylation	5	3	0.0257601	KIRP
GO:0006541	BP	glutamine metabolic process	23	6	0.025875	KIRP
GO:0061299	BP	retina vasculature morphogenesis in camera-type eye	11	5	0.0260723	KIRP
GO:0061448	BP	connective tissue development	270	54	0.0261617	KIRP
GO:0060586	BP	multicellular organismal iron ion homeostasis	9	4	0.0261898	KIRP
GO:0016338	BP	calcium-independent cell-cell adhesion via plasma membrane cell-adhesion molecules	23	6	0.0262831	KIRP
GO:0043666	BP	regulation of phosphoprotein phosphatase activity	57	13	0.0264505	KIRP
GO:0045069	BP	regulation of viral genome replication	86	15	0.0264633	KIRP
GO:0048703	BP	embryonic viscerocranium morphogenesis	10	5	0.0264856	KIRP
GO:0014902	BP	myotube differentiation	127	29	0.0265192	KIRP
GO:0071929	BP	alpha-tubulin acetylation	2	2	0.0268142	KIRP
GO:2000629	BP	negative regulation of miRNA metabolic process	20	7	0.0268161	KIRP
GO:0045834	BP	positive regulation of lipid metabolic process	154	31	0.0268979	KIRP
GO:0035304	BP	regulation of protein dephosphorylation	92	19	0.0271311	KIRP
GO:0000132	BP	establishment of mitotic spindle orientation	33	9	0.0271388	KIRP
GO:0002274	BP	myeloid leukocyte activation	234	36	0.0273434	KIRP
GO:1903901	BP	negative regulation of viral life cycle	25	7	0.0274957	KIRP
GO:0090630	BP	activation of GTPase activity	105	25	0.0276026	KIRP
GO:0016192	BP	vesicle-mediated transport	1502	219	0.0276241	KIRP
GO:1905205	BP	positive regulation of connective tissue replacement	11	3	0.0277148	KIRP
GO:0018009	BP	N-terminal peptidyl-L-cysteine N-palmitoylation	2	2	0.0277554	KIRP
GO:0006796	BP	phosphate-containing compound metabolic process	2698	377	0.0278436	KIRP
GO:0043534	BP	blood vessel endothelial cell migration	168	29	0.02791	KIRP
GO:0048680	BP	positive regulation of axon regeneration	13	5	0.0281406	KIRP
GO:0035023	BP	regulation of Rho protein signal transduction	86	20	0.0281415	KIRP
GO:0031532	BP	actin cytoskeleton reorganization	111	26	0.028174	KIRP
GO:0010712	BP	regulation of collagen metabolic process	44	10	0.0285975	KIRP
GO:0051149	BP	positive regulation of muscle cell differentiation	82	17	0.0286528	KIRP
GO:2000553	BP	positive regulation of T-helper 2 cell cytokine production	8	4	0.0289641	KIRP
GO:0007034	BP	vacuolar transport	158	29	0.029018	KIRP
GO:0019541	BP	propionate metabolic process	4	2	0.0290832	KIRP
GO:0072173	BP	metanephric tubule morphogenesis	11	5	0.0292347	KIRP
GO:0010594	BP	regulation of endothelial cell migration	221	38	0.0294729	KIRP
GO:1903625	BP	negative regulation of DNA catabolic process	3	2	0.0295212	KIRP
GO:0045332	BP	phospholipid translocation	52	13	0.0297306	KIRP
GO:0009612	BP	response to mechanical stimulus	208	39	0.0298598	KIRP
GO:0002863	BP	positive regulation of inflammatory response to antigenic stimulus	12	5	0.0299721	KIRP
GO:0045637	BP	regulation of myeloid cell differentiation	210	37	0.0300521	KIRP
GO:2000601	BP	positive regulation of Arp2/3 complex-mediated actin nucleation	10	4	0.0300898	KIRP
GO:0150011	BP	regulation of neuron projection arborization	14	6	0.0301182	KIRP
GO:2000147	BP	positive regulation of cell motility	571	92	0.030321	KIRP
GO:0070528	BP	protein kinase C signaling	35	11	0.0303214	KIRP
GO:0035272	BP	exocrine system development	46	13	0.0304873	KIRP
GO:0043502	BP	regulation of muscle adaptation	97	19	0.0305558	KIRP
GO:0052746	BP	inositol phosphorylation	2	2	0.0307425	KIRP
GO:0022402	BP	cell cycle process	1231	171	0.0312253	KIRP
GO:0038128	BP	ERBB2 signaling pathway	17	6	0.031227	KIRP
GO:0048660	BP	regulation of smooth muscle cell proliferation	172	31	0.0313357	KIRP
GO:0031346	BP	positive regulation of cell projection organization	348	67	0.0314584	KIRP
GO:0040017	BP	positive regulation of locomotion	586	94	0.0318664	KIRP
GO:0033002	BP	muscle cell proliferation	242	43	0.0321814	KIRP
GO:0019072	BP	viral genome packaging	2	2	0.0322407	KIRP
GO:0019074	BP	viral RNA genome packaging	2	2	0.0322407	KIRP
GO:0001706	BP	endoderm formation	58	15	0.0322647	KIRP
GO:0099010	BP	modification of postsynaptic structure	12	5	0.0327237	KIRP
GO:0048584	BP	positive regulation of response to stimulus	2134	295	0.0327378	KIRP
GO:0003183	BP	mitral valve morphogenesis	10	5	0.0327911	KIRP
GO:0090315	BP	negative regulation of protein targeting to membrane	6	3	0.0328138	KIRP
GO:0022409	BP	positive regulation of cell-cell adhesion	314	53	0.0328773	KIRP
GO:0072278	BP	metanephric comma-shaped body morphogenesis	4	3	0.0329542	KIRP
GO:0007160	BP	cell-matrix adhesion	236	47	0.0329882	KIRP
GO:0032486	BP	Rap protein signal transduction	13	4	0.0330491	KIRP
GO:0016477	BP	cell migration	1537	237	0.0330839	KIRP
GO:0070572	BP	positive regulation of neuron projection regeneration	14	5	0.0331036	KIRP
GO:0006793	BP	phosphorus metabolic process	2724	379	0.0333803	KIRP
GO:0003241	BP	growth involved in heart morphogenesis	5	3	0.0335036	KIRP
GO:0021915	BP	neural tube development	164	35	0.033533	KIRP
GO:0035987	BP	endodermal cell differentiation	49	13	0.0335778	KIRP
GO:0061024	BP	membrane organization	793	117	0.0338154	KIRP
GO:0009786	BP	regulation of asymmetric cell division	5	3	0.0340986	KIRP
GO:0034204	BP	lipid translocation	57	14	0.0342678	KIRP
GO:0051216	BP	cartilage development	197	41	0.0343572	KIRP
GO:0043254	BP	regulation of protein-containing complex assembly	401	67	0.034428	KIRP
GO:1902307	BP	positive regulation of sodium ion transmembrane transport	21	7	0.0346933	KIRP
GO:0034105	BP	positive regulation of tissue remodeling	22	4	0.0346979	KIRP
GO:0110058	BP	positive regulation of blood vessel endothelial cell differentiation	1	1	0.0348526	KIRP
GO:0060434	BP	bronchus morphogenesis	2	2	0.034899	KIRP
GO:0045760	BP	positive regulation of action potential	8	4	0.0349259	KIRP
GO:0048016	BP	inositol phosphate-mediated signaling	58	15	0.0350053	KIRP
GO:0016575	BP	histone deacetylation	101	21	0.0351493	KIRP
GO:0006360	BP	transcription by RNA polymerase I	60	12	0.0352956	KIRP
GO:0030335	BP	positive regulation of cell migration	546	88	0.0354611	KIRP
GO:0006470	BP	protein dephosphorylation	254	44	0.0354951	KIRP
GO:0097581	BP	lamellipodium organization	92	21	0.0355114	KIRP
GO:0045869	BP	negative regulation of single stranded viral RNA replication via double stranded DNA intermediate	16	4	0.0355611	KIRP
GO:0014020	BP	primary neural tube formation	98	23	0.0357695	KIRP
GO:0046473	BP	phosphatidic acid metabolic process	35	10	0.0359847	KIRP
GO:1901889	BP	negative regulation of cell junction assembly	32	10	0.0360068	KIRP
GO:0006656	BP	phosphatidylcholine biosynthetic process	29	8	0.0360685	KIRP
GO:0048659	BP	smooth muscle cell proliferation	176	31	0.0361664	KIRP
GO:0007528	BP	neuromuscular junction development	48	12	0.0361698	KIRP
GO:1904627	BP	response to phorbol 13-acetate 12-myristate	7	3	0.0366471	KIRP
GO:1904628	BP	cellular response to phorbol 13-acetate 12-myristate	7	3	0.0366471	KIRP
GO:0048014	BP	Tie signaling pathway	4	2	0.036743	KIRP
GO:0071962	BP	mitotic sister chromatid cohesion, centromeric	4	2	0.0367543	KIRP
GO:0048870	BP	cell motility	1728	257	0.0367862	KIRP
GO:0031099	BP	regeneration	186	35	0.0368388	KIRP
GO:0046597	BP	negative regulation of viral entry into host cell	21	6	0.0370137	KIRP
GO:2001245	BP	regulation of phosphatidylcholine biosynthetic process	5	3	0.0375419	KIRP
GO:0000737	BP	DNA catabolic process, endonucleolytic	25	6	0.0375723	KIRP
GO:0048842	BP	positive regulation of axon extension involved in axon guidance	7	4	0.0381807	KIRP
GO:0046462	BP	monoacylglycerol metabolic process	14	4	0.0384569	KIRP
GO:0071963	BP	establishment or maintenance of cell polarity regulating cell shape	2	2	0.0384604	KIRP
GO:1903527	BP	positive regulation of membrane tubulation	4	3	0.0384662	KIRP
GO:0006650	BP	glycerophospholipid metabolic process	305	49	0.0384748	KIRP
GO:1905065	BP	positive regulation of vascular associated smooth muscle cell differentiation	13	3	0.0385458	KIRP
GO:0035601	BP	protein deacylation	132	25	0.0386845	KIRP
GO:1900076	BP	regulation of cellular response to insulin stimulus	69	15	0.0386908	KIRP
GO:0009237	BP	siderophore metabolic process	1	1	0.0387468	KIRP
GO:0019290	BP	siderophore biosynthetic process	1	1	0.0387468	KIRP
GO:0071539	BP	protein localization to centrosome	32	8	0.0387722	KIRP
GO:0007435	BP	salivary gland morphogenesis	32	10	0.0387772	KIRP
GO:0048041	BP	focal adhesion assembly	85	22	0.0388541	KIRP
GO:0032964	BP	collagen biosynthetic process	49	11	0.0390398	KIRP
GO:1905940	BP	negative regulation of gonad development	4	3	0.0390703	KIRP
GO:0019673	BP	GDP-mannose metabolic process	7	3	0.0392204	KIRP
GO:0043277	BP	apoptotic cell clearance	48	11	0.0392446	KIRP
GO:0009298	BP	GDP-mannose biosynthetic process	4	2	0.0392717	KIRP
GO:0002455	BP	humoral immune response mediated by circulating immunoglobulin	45	9	0.0392875	KIRP
GO:0032712	BP	negative regulation of interleukin-3 production	1	1	0.0394362	KIRP
GO:0071656	BP	negative regulation of granulocyte colony-stimulating factor production	1	1	0.0394362	KIRP
GO:0003016	BP	respiratory system process	39	10	0.0394773	KIRP
GO:2000049	BP	positive regulation of cell-cell adhesion mediated by cadherin	11	5	0.0395717	KIRP
GO:0002709	BP	regulation of T cell mediated immunity	84	14	0.0396766	KIRP
GO:0045668	BP	negative regulation of osteoblast differentiation	54	13	0.0401727	KIRP
GO:1901186	BP	positive regulation of ERBB signaling pathway	38	9	0.0403955	KIRP
GO:0046657	BP	folic acid catabolic process	1	1	0.0405936	KIRP
GO:0010882	BP	regulation of cardiac muscle contraction by calcium ion signaling	26	7	0.0406889	KIRP
GO:0072017	BP	distal tubule development	12	5	0.0407156	KIRP
GO:1905870	BP	positive regulation of 3'-UTR-mediated mRNA stabilization	5	3	0.0408802	KIRP
GO:0016043	BP	cellular component organization	6083	812	0.041021	KIRP
GO:0034334	BP	adherens junction maintenance	7	4	0.0410476	KIRP
GO:0010596	BP	negative regulation of endothelial cell migration	91	15	0.0411296	KIRP
GO:1903279	BP	regulation of calcium:sodium antiporter activity	3	2	0.0414171	KIRP
GO:1904398	BP	positive regulation of neuromuscular junction development	2	2	0.0414786	KIRP
GO:0044355	BP	clearance of foreign intracellular DNA	1	1	0.04148	KIRP
GO:0099046	BP	clearance of foreign intracellular nucleic acids	1	1	0.04148	KIRP
GO:0002883	BP	regulation of hypersensitivity	8	3	0.0415792	KIRP
GO:0040019	BP	positive regulation of embryonic development	22	7	0.0419594	KIRP
GO:0043455	BP	regulation of secondary metabolic process	15	5	0.0422807	KIRP
GO:0048021	BP	regulation of melanin biosynthetic process	15	5	0.0422807	KIRP
GO:1900376	BP	regulation of secondary metabolite biosynthetic process	15	5	0.0422807	KIRP
GO:0120032	BP	regulation of plasma membrane bounded cell projection assembly	194	36	0.0423865	KIRP
GO:0035767	BP	endothelial cell chemotaxis	30	9	0.0424533	KIRP
GO:0001953	BP	negative regulation of cell-matrix adhesion	40	11	0.0424778	KIRP
GO:0061868	BP	hepatic stellate cell migration	2	2	0.0427509	KIRP
GO:0061869	BP	regulation of hepatic stellate cell migration	2	2	0.0427509	KIRP
GO:0061870	BP	positive regulation of hepatic stellate cell migration	2	2	0.0427509	KIRP
GO:0150012	BP	positive regulation of neuron projection arborization	8	4	0.0431088	KIRP
GO:0019511	BP	peptidyl-proline hydroxylation	15	5	0.0431714	KIRP
GO:0043654	BP	recognition of apoptotic cell	7	3	0.0434754	KIRP
GO:0072385	BP	minus-end-directed organelle transport along microtubule	5	3	0.0439751	KIRP
GO:0001945	BP	lymph vessel development	31	9	0.044081	KIRP
GO:0003252	BP	negative regulation of cell proliferation involved in heart valve morphogenesis	2	2	0.0441399	KIRP
GO:0072223	BP	metanephric glomerular mesangium development	5	3	0.0441514	KIRP
GO:2000097	BP	regulation of smooth muscle cell-matrix adhesion	4	2	0.0442796	KIRP
GO:0051893	BP	regulation of focal adhesion assembly	64	17	0.0443285	KIRP
GO:0090109	BP	regulation of cell-substrate junction assembly	64	17	0.0443285	KIRP
GO:0035426	BP	extracellular matrix-cell signaling	5	3	0.0445749	KIRP
GO:0071216	BP	cellular response to biotic stimulus	250	36	0.0447335	KIRP
GO:0003174	BP	mitral valve development	11	5	0.0448127	KIRP
GO:0031529	BP	ruffle organization	58	13	0.0448827	KIRP
GO:0001833	BP	inner cell mass cell proliferation	14	4	0.0449123	KIRP
GO:0072359	BP	circulatory system development	1186	187	0.044987	KIRP
GO:1903729	BP	regulation of plasma membrane organization	17	6	0.0450896	KIRP
GO:0030032	BP	lamellipodium assembly	73	17	0.0451105	KIRP
GO:0006273	BP	lagging strand elongation	4	2	0.0452431	KIRP
GO:0090650	BP	cellular response to oxygen-glucose deprivation	5	2	0.0454215	KIRP
GO:0140747	BP	regulation of ncRNA transcription	23	6	0.0454628	KIRP
GO:0042246	BP	tissue regeneration	69	15	0.0457725	KIRP
GO:0035745	BP	T-helper 2 cell cytokine production	10	4	0.0457857	KIRP
GO:2000551	BP	regulation of T-helper 2 cell cytokine production	10	4	0.0457857	KIRP
GO:0014910	BP	regulation of smooth muscle cell migration	86	18	0.0458272	KIRP
GO:0002524	BP	hypersensitivity	11	4	0.045896	KIRP
GO:0051138	BP	positive regulation of NK T cell differentiation	4	3	0.0461497	KIRP
GO:0097035	BP	regulation of membrane lipid distribution	62	14	0.0461565	KIRP
GO:0035303	BP	regulation of dephosphorylation	129	23	0.0466611	KIRP
GO:0006971	BP	hypotonic response	12	5	0.0466771	KIRP
GO:0001704	BP	formation of primary germ layer	125	28	0.0467093	KIRP
GO:0150116	BP	regulation of cell-substrate junction organization	69	18	0.0467609	KIRP
GO:0008333	BP	endosome to lysosome transport	70	14	0.0469012	KIRP
GO:0140484	BP	5-aminolevulinic acid import across plasma membrane	1	1	0.0471495	KIRP
GO:0018401	BP	peptidyl-proline hydroxylation to 4-hydroxy-L-proline	10	4	0.0472204	KIRP
GO:0034101	BP	erythrocyte homeostasis	136	26	0.0475467	KIRP
GO:0051014	BP	actin filament severing	16	5	0.047586	KIRP
GO:0046638	BP	positive regulation of alpha-beta T cell differentiation	53	12	0.0475918	KIRP
GO:0140131	BP	positive regulation of lymphocyte chemotaxis	19	5	0.0478422	KIRP
GO:0008285	BP	negative regulation of cell population proliferation	768	116	0.0480818	KIRP
GO:0060534	BP	trachea cartilage development	7	4	0.0481003	KIRP
GO:0006500	BP	N-terminal protein palmitoylation	3	2	0.0481128	KIRP
GO:0002703	BP	regulation of leukocyte mediated immunity	228	32	0.0481886	KIRP
GO:0010810	BP	regulation of cell-substrate adhesion	219	43	0.0482845	KIRP
GO:0042659	BP	regulation of cell fate specification	25	8	0.0483726	KIRP
GO:2000146	BP	negative regulation of cell motility	368	58	0.0484584	KIRP
GO:0048598	BP	embryonic morphogenesis	609	114	0.0485855	KIRP
GO:0031272	BP	regulation of pseudopodium assembly	12	4	0.0487845	KIRP
GO:0031274	BP	positive regulation of pseudopodium assembly	12	4	0.0487845	KIRP
GO:0007369	BP	gastrulation	192	39	0.0488305	KIRP
GO:1900756	BP	protein processing in phagocytic vesicle	2	2	0.0489646	KIRP
GO:1903921	BP	regulation of protein processing in phagocytic vesicle	2	2	0.0489646	KIRP
GO:1903923	BP	positive regulation of protein processing in phagocytic vesicle	2	2	0.0489646	KIRP
GO:0035988	BP	chondrocyte proliferation	24	7	0.0489665	KIRP
GO:0003197	BP	endocardial cushion development	48	13	0.0490193	KIRP
GO:1901224	BP	positive regulation of NIK/NF-kappaB signaling	66	11	0.049044	KIRP
GO:0071313	BP	cellular response to caffeine	11	4	0.0490729	KIRP
GO:0052651	BP	monoacylglycerol catabolic process	7	3	0.0491255	KIRP
GO:1904738	BP	vascular associated smooth muscle cell migration	47	10	0.0491346	KIRP
GO:0002726	BP	positive regulation of T cell cytokine production	25	6	0.0491407	KIRP
GO:0060491	BP	regulation of cell projection assembly	196	36	0.0491768	KIRP
GO:0072282	BP	metanephric nephron tubule morphogenesis	8	4	0.0493597	KIRP
GO:0002282	BP	microglial cell activation involved in immune response	5	2	0.0494245	KIRP
GO:0080164	BP	regulation of nitric oxide metabolic process	63	12	0.0494726	KIRP
GO:0006423	BP	cysteinyl-tRNA aminoacylation	2	2	0.0496879	KIRP
GO:0045773	BP	positive regulation of axon extension	38	11	0.0497221	KIRP
GO:0001568	BP	blood vessel development	767	121	0.0497547	KIRP
GO:0030055	CC	cell-substrate junction	429	96	2.12382e-05	KIRP
GO:0005925	CC	focal adhesion	419	93	4.09602e-05	KIRP
GO:0042641	CC	actomyosin	77	27	0.000192809	KIRP
GO:0031252	CC	cell leading edge	418	91	0.00035924	KIRP
GO:0001726	CC	ruffle	177	44	0.000389688	KIRP
GO:0030027	CC	lamellipodium	202	49	0.000475114	KIRP
GO:0005829	CC	cytosol	5257	704	0.000598753	KIRP
GO:0032432	CC	actin filament bundle	78	25	0.00121861	KIRP
GO:0001725	CC	stress fiber	70	23	0.00159286	KIRP
GO:0097517	CC	contractile actin filament bundle	70	23	0.00159286	KIRP
GO:0005856	CC	cytoskeleton	2299	333	0.0025332	KIRP
GO:0005911	CC	cell-cell junction	496	96	0.00295077	KIRP
GO:0048471	CC	perinuclear region of cytoplasm	719	121	0.00337012	KIRP
GO:0031982	CC	vesicle	3928	511	0.00512586	KIRP
GO:0005923	CC	bicellular tight junction	124	28	0.00523433	KIRP
GO:0070160	CC	tight junction	129	29	0.00524408	KIRP
GO:0140552	CC	TEAD-YAP complex	3	3	0.00631883	KIRP
GO:0005903	CC	brush border	99	23	0.00740794	KIRP
GO:0031902	CC	late endosome membrane	146	28	0.00766063	KIRP
GO:0043296	CC	apical junction complex	147	32	0.00853279	KIRP
GO:0001650	CC	fibrillar center	144	29	0.00866847	KIRP
GO:0015629	CC	actin cytoskeleton	496	94	0.00908984	KIRP
GO:0005938	CC	cell cortex	309	65	0.00920895	KIRP
GO:0033269	CC	internode region of axon	3	3	0.00948362	KIRP
GO:0046930	CC	pore complex	26	7	0.00976801	KIRP
GO:0045244	CC	succinate-CoA ligase complex (GDP-forming)	2	2	0.00999789	KIRP
GO:0016328	CC	lateral plasma membrane	64	17	0.0105962	KIRP
GO:0030139	CC	endocytic vesicle	331	57	0.01154	KIRP
GO:0070062	CC	extracellular exosome	2076	272	0.0116932	KIRP
GO:0072563	CC	endothelial microparticle	3	2	0.0118065	KIRP
GO:1903561	CC	extracellular vesicle	2147	277	0.0120024	KIRP
GO:0031526	CC	brush border membrane	57	13	0.0121804	KIRP
GO:0043230	CC	extracellular organelle	2148	277	0.0122187	KIRP
GO:0065010	CC	extracellular membrane-bounded organelle	2148	277	0.0122187	KIRP
GO:0099023	CC	vesicle tethering complex	60	14	0.0142768	KIRP
GO:0090724	CC	central region of growth cone	4	3	0.0158314	KIRP
GO:1990531	CC	phospholipid-translocating ATPase complex	14	6	0.0160812	KIRP
GO:0030897	CC	HOPS complex	7	3	0.0168531	KIRP
GO:0070161	CC	anchoring junction	1311	225	0.0176493	KIRP
GO:0016581	CC	NuRD complex	15	6	0.01768	KIRP
GO:0090545	CC	CHD-type complex	15	6	0.01768	KIRP
GO:0031981	CC	nuclear lumen	4695	582	0.0177569	KIRP
GO:0000118	CC	histone deacetylase complex	80	19	0.0198209	KIRP
GO:0005654	CC	nucleoplasm	4040	531	0.0206334	KIRP
GO:0034451	CC	centriolar satellite	106	21	0.020645	KIRP
GO:0031093	CC	platelet alpha granule lumen	64	13	0.0225149	KIRP
GO:0042709	CC	succinate-CoA ligase complex	3	2	0.0245267	KIRP
GO:0005737	CC	cytoplasm	11502	1402	0.0245937	KIRP
GO:0042405	CC	nuclear inclusion body	12	4	0.0274155	KIRP
GO:0005826	CC	actomyosin contractile ring	4	3	0.0275245	KIRP
GO:0034684	CC	integrin alphav-beta5 complex	2	2	0.0305747	KIRP
GO:0033263	CC	CORVET complex	7	3	0.0328959	KIRP
GO:0005770	CC	late endosome	272	44	0.0335212	KIRP
GO:0030864	CC	cortical actin cytoskeleton	79	20	0.0361896	KIRP
GO:0098862	CC	cluster of actin-based cell projections	154	29	0.0381654	KIRP
GO:0015630	CC	microtubule cytoskeleton	1335	185	0.0387341	KIRP
GO:0031091	CC	platelet alpha granule	87	16	0.0394347	KIRP
GO:0030136	CC	clathrin-coated vesicle	203	34	0.040296	KIRP
GO:0070603	CC	SWI/SNF superfamily-type complex	90	18	0.0405665	KIRP
GO:0097197	CC	tetraspanin-enriched microdomain	10	4	0.0408135	KIRP
GO:0005765	CC	lysosomal membrane	405	62	0.0431287	KIRP
GO:0098852	CC	lytic vacuole membrane	405	62	0.0431287	KIRP
GO:0031465	CC	Cul4B-RING E3 ubiquitin ligase complex	5	2	0.0463779	KIRP
GO:0032153	CC	cell division site	70	16	0.0470815	KIRP
GO:0031974	CC	membrane-enclosed lumen	5786	693	0.0475656	KIRP
GO:0043233	CC	organelle lumen	5786	693	0.0475656	KIRP
GO:0070013	CC	intracellular organelle lumen	5786	693	0.0475656	KIRP
GO:0005813	CC	centrosome	613	87	0.0476332	KIRP
GO:0016222	CC	procollagen-proline 4-dioxygenase complex	2	2	0.048328	KIRP
GO:0043540	CC	6-phosphofructo-2-kinase/fructose-2,6-biphosphatase complex	1	1	0.0486929	KIRP
GO:0030695	MF	GTPase regulator activity	455	114	4.92137e-09	KIRP
GO:0060589	MF	nucleoside-triphosphatase regulator activity	455	114	4.92137e-09	KIRP
GO:0005085	MF	guanyl-nucleotide exchange factor activity	219	64	9.54939e-08	KIRP
GO:0003779	MF	actin binding	431	98	5.77266e-05	KIRP
GO:0019899	MF	enzyme binding	2029	322	0.000107101	KIRP
GO:0030234	MF	enzyme regulator activity	1190	194	0.000188616	KIRP
GO:0051020	MF	GTPase binding	301	64	0.000225785	KIRP
GO:0017124	MF	SH3 domain binding	123	33	0.00051228	KIRP
GO:0031267	MF	small GTPase binding	270	57	0.000664767	KIRP
GO:0005096	MF	GTPase activator activity	247	55	0.00111094	KIRP
GO:0005024	MF	transforming growth factor beta receptor activity	12	7	0.00113959	KIRP
GO:0043168	MF	anion binding	2318	340	0.00127263	KIRP
GO:0070290	MF	N-acylphosphatidylethanolamine-specific phospholipase D activity	3	3	0.00181798	KIRP
GO:0019203	MF	carbohydrate phosphatase activity	10	5	0.00184326	KIRP
GO:0050308	MF	sugar-phosphatase activity	10	5	0.00184326	KIRP
GO:0035091	MF	phosphatidylinositol binding	266	56	0.00191409	KIRP
GO:0051015	MF	actin filament binding	216	52	0.00194548	KIRP
GO:0000166	MF	nucleotide binding	2088	307	0.00280175	KIRP
GO:1901265	MF	nucleoside phosphate binding	2089	307	0.002838	KIRP
GO:0044877	MF	protein-containing complex binding	1255	201	0.00289216	KIRP
GO:0001221	MF	transcription coregulator binding	108	31	0.00313284	KIRP
GO:0050218	MF	propionate-CoA ligase activity	4	3	0.00320675	KIRP
GO:0070742	MF	C2H2 zinc finger domain binding	15	8	0.00331585	KIRP
GO:0036094	MF	small molecule binding	2420	346	0.0035439	KIRP
GO:0019904	MF	protein domain specific binding	681	122	0.00365658	KIRP
GO:0032555	MF	purine ribonucleotide binding	1832	274	0.00398148	KIRP
GO:0032553	MF	ribonucleotide binding	1849	276	0.00400423	KIRP
GO:0032559	MF	adenyl ribonucleotide binding	1501	236	0.00435426	KIRP
GO:0034452	MF	dynactin binding	12	6	0.00494332	KIRP
GO:0017076	MF	purine nucleotide binding	1846	274	0.00534344	KIRP
GO:0035639	MF	purine ribonucleoside triphosphate binding	1763	263	0.00538691	KIRP
GO:0030554	MF	adenyl nucleotide binding	1513	236	0.00577191	KIRP
GO:0005524	MF	ATP binding	1438	226	0.00587813	KIRP
GO:0140333	MF	glycerophospholipid flippase activity	14	7	0.00613247	KIRP
GO:0042805	MF	actinin binding	36	12	0.00664194	KIRP
GO:0043533	MF	inositol 1,3,4,5 tetrakisphosphate binding	5	4	0.00672528	KIRP
GO:0097367	MF	carbohydrate derivative binding	2193	316	0.00739997	KIRP
GO:0004615	MF	phosphomannomutase activity	2	2	0.0087341	KIRP
GO:0043548	MF	phosphatidylinositol 3-kinase binding	28	10	0.00909176	KIRP
GO:0004776	MF	succinate-CoA ligase (GDP-forming) activity	2	2	0.00999789	KIRP
GO:0016877	MF	ligase activity, forming carbon-sulfur bonds	39	10	0.0102298	KIRP
GO:0004675	MF	transmembrane receptor protein serine/threonine kinase activity	18	7	0.0105779	KIRP
GO:0016874	MF	ligase activity	159	29	0.0107937	KIRP
GO:0048185	MF	activin binding	15	6	0.0111169	KIRP
GO:0015085	MF	calcium ion transmembrane transporter activity	135	32	0.0121289	KIRP
GO:0008092	MF	cytoskeletal protein binding	980	166	0.0122537	KIRP
GO:0140327	MF	flippase activity	17	7	0.0125675	KIRP
GO:0034713	MF	type I transforming growth factor beta receptor binding	11	5	0.0132169	KIRP
GO:0001223	MF	transcription coactivator binding	40	13	0.0136267	KIRP
GO:0003873	MF	6-phosphofructo-2-kinase activity	4	3	0.0141967	KIRP
GO:0140303	MF	intramembrane lipid transporter activity	41	12	0.0154023	KIRP
GO:0019960	MF	C-X3-C chemokine binding	5	3	0.0156462	KIRP
GO:0045296	MF	cadherin binding	331	60	0.0166534	KIRP
GO:0019901	MF	protein kinase binding	668	114	0.0167529	KIRP
GO:0016878	MF	acid-thiol ligase activity	29	8	0.0168447	KIRP
GO:0019900	MF	kinase binding	749	127	0.0169975	KIRP
GO:0008289	MF	lipid binding	802	124	0.0175747	KIRP
GO:0005547	MF	phosphatidylinositol-3,4,5-trisphosphate binding	38	11	0.021416	KIRP
GO:0005026	MF	transforming growth factor beta receptor activity, type II	2	2	0.0218128	KIRP
GO:0016887	MF	ATP hydrolysis activity	331	52	0.0218646	KIRP
GO:0036122	MF	BMP binding	20	6	0.0219269	KIRP
GO:0004331	MF	fructose-2,6-bisphosphate 2-phosphatase activity	5	3	0.0230685	KIRP
GO:0140326	MF	ATPase-coupled intramembrane lipid transporter activity	27	9	0.0236082	KIRP
GO:0031737	MF	CX3C chemokine receptor binding	3	2	0.0239872	KIRP
GO:0005046	MF	KDEL sequence binding	3	2	0.0241406	KIRP
GO:0008443	MF	phosphofructokinase activity	7	4	0.0244026	KIRP
GO:0004774	MF	succinate-CoA ligase activity	3	2	0.0245267	KIRP
GO:0008420	MF	RNA polymerase II CTD heptapeptide repeat phosphatase activity	7	4	0.0247581	KIRP
GO:0140537	MF	transcription regulator activator activity	4	3	0.0250128	KIRP
GO:0018024	MF	histone-lysine N-methyltransferase activity	42	12	0.0257863	KIRP
GO:0005160	MF	transforming growth factor beta receptor binding	23	7	0.0265787	KIRP
GO:0002162	MF	dystroglycan binding	11	5	0.0271524	KIRP
GO:0001784	MF	phosphotyrosine residue binding	44	12	0.0272117	KIRP
GO:0016783	MF	sulfurtransferase activity	10	3	0.027892	KIRP
GO:0003714	MF	transcription corepressor activity	183	36	0.0278945	KIRP
GO:0005543	MF	phospholipid binding	456	77	0.0281023	KIRP
GO:0050431	MF	transforming growth factor beta binding	24	8	0.0282303	KIRP
GO:0031545	MF	peptidyl-proline 4-dioxygenase activity	8	4	0.0295086	KIRP
GO:0043274	MF	phospholipase binding	22	7	0.030589	KIRP
GO:1990430	MF	extracellular matrix protein binding	6	3	0.0308812	KIRP
GO:0017002	MF	activin receptor activity	10	4	0.0322621	KIRP
GO:1901981	MF	phosphatidylinositol phosphate binding	175	34	0.0323457	KIRP
GO:0050840	MF	extracellular matrix binding	56	14	0.0342562	KIRP
GO:0042731	MF	PH domain binding	7	4	0.0345654	KIRP
GO:0001618	MF	virus receptor activity	73	15	0.0347345	KIRP
GO:0140097	MF	catalytic activity, acting on DNA	228	35	0.034741	KIRP
GO:0140346	MF	phosphatidylserine flippase activity	5	3	0.0358566	KIRP
GO:0140272	MF	exogenous protein binding	74	15	0.0368798	KIRP
GO:0015190	MF	L-leucine transmembrane transporter activity	5	3	0.0375473	KIRP
GO:1990272	MF	anti-Mullerian hormone receptor activity	1	1	0.0377043	KIRP
GO:0030235	MF	nitric-oxide synthase regulator activity	7	4	0.0379754	KIRP
GO:1990698	MF	palmitoleoyltransferase activity	2	2	0.0382548	KIRP
GO:0005245	MF	voltage-gated calcium channel activity	44	13	0.038481	KIRP
GO:0019787	MF	ubiquitin-like protein transferase activity	438	66	0.0387513	KIRP
GO:0005519	MF	cytoskeletal regulatory protein binding	2	2	0.0395586	KIRP
GO:0001222	MF	transcription corepressor binding	43	13	0.0397341	KIRP
GO:0030272	MF	5-formyltetrahydrofolate cyclo-ligase activity	1	1	0.0405936	KIRP
GO:0004790	MF	thioether S-methyltransferase activity	1	1	0.0406681	KIRP
GO:0030748	MF	amine N-methyltransferase activity	1	1	0.0406681	KIRP
GO:0102707	MF	S-adenosyl-L-methionine:beta-alanine N-methyltransferase activity	1	1	0.0406681	KIRP
GO:0051287	MF	NAD binding	53	11	0.0407476	KIRP
GO:0017111	MF	ribonucleoside triphosphate phosphatase activity	640	88	0.0407511	KIRP
GO:0003909	MF	DNA ligase activity	3	2	0.0415316	KIRP
GO:0003910	MF	DNA ligase (ATP) activity	3	2	0.0415316	KIRP
GO:0050839	MF	cell adhesion molecule binding	553	94	0.0418062	KIRP
GO:0098821	MF	BMP receptor activity	7	3	0.042551	KIRP
GO:0016279	MF	protein-lysine N-methyltransferase activity	56	13	0.0425918	KIRP
GO:0005262	MF	calcium channel activity	119	26	0.0433939	KIRP
GO:0005518	MF	collagen binding	69	16	0.0436606	KIRP
GO:0008465	MF	glycerate dehydrogenase activity	1	1	0.044592	KIRP
GO:0016618	MF	hydroxypyruvate reductase activity	1	1	0.044592	KIRP
GO:0030267	MF	glyoxylate reductase (NADP+) activity	1	1	0.044592	KIRP
GO:0106345	MF	glyoxylate reductase activity	1	1	0.044592	KIRP
GO:0018729	MF	propionate CoA-transferase activity	1	1	0.0454751	KIRP
GO:0043759	MF	methylbutanoate-CoA ligase activity	1	1	0.0454751	KIRP
GO:0016278	MF	lysine N-methyltransferase activity	57	13	0.0461057	KIRP
GO:0019212	MF	phosphatase inhibitor activity	51	11	0.0461165	KIRP
GO:0060090	MF	molecular adaptor activity	478	78	0.0462786	KIRP
GO:0140485	MF	5-aminolevulinic acid transmembrane transporter activity	1	1	0.0471495	KIRP
GO:0045505	MF	dynein intermediate chain binding	35	9	0.0472004	KIRP
GO:0042802	MF	identical protein binding	1948	261	0.0472872	KIRP
GO:0016208	MF	AMP binding	15	5	0.0474912	KIRP
GO:0051219	MF	phosphoprotein binding	90	19	0.0479492	KIRP
GO:0004817	MF	cysteine-tRNA ligase activity	2	2	0.0496879	KIRP
GO:0004569	MF	glycoprotein endo-alpha-1,2-mannosidase activity	1	1	0.0498421	KIRP

## Sheet: THCA
ID	ONTOLOGY	TERM	N	DE	P.DE	Cancer
GO:0008284	BP	positive regulation of cell population proliferation	949	28	3.04489e-05	THCA
GO:0002725	BP	negative regulation of T cell cytokine production	8	3	5.61675e-05	THCA
GO:0090231	BP	regulation of spindle checkpoint	21	4	7.28864e-05	THCA
GO:0090266	BP	regulation of mitotic cell cycle spindle assembly checkpoint	21	4	7.28864e-05	THCA
GO:1903504	BP	regulation of mitotic spindle checkpoint	21	4	7.28864e-05	THCA
GO:0010634	BP	positive regulation of epithelial cell migration	172	10	0.000207468	THCA
GO:0042127	BP	regulation of cell population proliferation	1709	39	0.000266125	THCA
GO:0090232	BP	positive regulation of spindle checkpoint	12	3	0.000321322	THCA
GO:0090267	BP	positive regulation of mitotic cell cycle spindle assembly checkpoint	12	3	0.000321322	THCA
GO:0008283	BP	cell population proliferation	1987	43	0.000374715	THCA
GO:0035556	BP	intracellular signal transduction	2607	53	0.000412109	THCA
GO:0002719	BP	negative regulation of cytokine production involved in immune response	32	4	0.000444924	THCA
GO:0034713	MF	type I transforming growth factor beta receptor binding	11	3	0.000493932	THCA
GO:0010763	BP	positive regulation of fibroblast migration	17	4	0.000517773	THCA
GO:0120092	MF	crotonyl-CoA hydratase activity	2	2	0.000545888	THCA
GO:0051784	BP	negative regulation of nuclear division	63	5	0.000580165	THCA
GO:0010799	BP	regulation of peptidyl-threonine phosphorylation	45	5	0.000630608	THCA
GO:0010762	BP	regulation of fibroblast migration	40	5	0.00064668	THCA
GO:0002701	BP	negative regulation of production of molecular mediator of immune response	43	4	0.000787748	THCA
GO:0051315	BP	attachment of mitotic spindle microtubules to kinetochore	21	3	0.000807381	THCA
GO:0032133	CC	chromosome passenger complex	6	2	0.000808075	THCA
GO:0090235	BP	regulation of metaphase plate congression	13	3	0.000842223	THCA
GO:0008532	MF	N-acetyllactosaminide beta-1,3-N-acetylglucosaminyltransferase activity	4	2	0.000878138	THCA
GO:1903490	BP	positive regulation of mitotic cytokinesis	7	2	0.000894117	THCA
GO:0043412	BP	macromolecule modification	3704	64	0.000904235	THCA
GO:0002710	BP	negative regulation of T cell mediated immunity	24	3	0.000914534	THCA
GO:0046328	BP	regulation of JNK cascade	139	8	0.000932849	THCA
GO:0010872	BP	regulation of cholesterol esterification	6	2	0.000970541	THCA
GO:0030335	BP	positive regulation of cell migration	545	17	0.00114784	THCA
GO:0002823	BP	negative regulation of adaptive immune response based on somatic recombination of immune receptors built from immunoglobulin superfamily domains	53	4	0.00133003	THCA
GO:0007094	BP	mitotic spindle assembly checkpoint signaling	46	4	0.0013302	THCA
GO:0071173	BP	spindle assembly checkpoint signaling	46	4	0.0013302	THCA
GO:0071174	BP	mitotic spindle checkpoint signaling	46	4	0.0013302	THCA
GO:0051783	BP	regulation of nuclear division	144	7	0.00133835	THCA
GO:0002707	BP	negative regulation of lymphocyte mediated immunity	52	4	0.00138832	THCA
GO:1902531	BP	regulation of intracellular signal transduction	1718	37	0.00140609	THCA
GO:0014902	BP	myotube differentiation	127	8	0.0014952	THCA
GO:0001667	BP	ameboidal-type cell migration	482	16	0.00155712	THCA
GO:0045841	BP	negative regulation of mitotic metaphase/anaphase transition	48	4	0.00158449	THCA
GO:0033046	BP	negative regulation of sister chromatid segregation	50	4	0.00166048	THCA
GO:0033048	BP	negative regulation of mitotic sister chromatid segregation	50	4	0.00166048	THCA
GO:2000816	BP	negative regulation of mitotic sister chromatid separation	50	4	0.00166048	THCA
GO:2000147	BP	positive regulation of cell motility	570	17	0.0017099	THCA
GO:1902412	BP	regulation of mitotic cytokinesis	10	2	0.00171412	THCA
GO:0031577	BP	spindle checkpoint signaling	47	4	0.00176745	THCA
GO:0050790	BP	regulation of catalytic activity	2279	45	0.00180369	THCA
GO:0030311	BP	poly-N-acetyllactosamine biosynthetic process	8	2	0.00180976	THCA
GO:0007229	BP	integrin-mediated signaling pathway	113	7	0.0018354	THCA
GO:0002822	BP	regulation of adaptive immune response based on somatic recombination of immune receptors built from immunoglobulin superfamily domains	173	7	0.00184221	THCA
GO:1902423	BP	regulation of attachment of mitotic spindle microtubules to kinetochore	8	2	0.00188073	THCA
GO:1902425	BP	positive regulation of attachment of mitotic spindle microtubules to kinetochore	8	2	0.00188073	THCA
GO:0002820	BP	negative regulation of adaptive immune response	57	4	0.00191204	THCA
GO:0070663	BP	regulation of leukocyte proliferation	261	9	0.00193566	THCA
GO:0034433	BP	steroid esterification	9	2	0.00194097	THCA
GO:0034434	BP	sterol esterification	9	2	0.00194097	THCA
GO:0034435	BP	cholesterol esterification	9	2	0.00194097	THCA
GO:0019220	BP	regulation of phosphate metabolic process	1364	31	0.00199974	THCA
GO:0007088	BP	regulation of mitotic nuclear division	118	6	0.00206631	THCA
GO:0051174	BP	regulation of phosphorus metabolic process	1365	31	0.00206809	THCA
GO:1902170	BP	cellular response to reactive nitrogen species	19	3	0.0020736	THCA
GO:1902100	BP	negative regulation of metaphase/anaphase transition of cell cycle	50	4	0.00211083	THCA
GO:0120040	BP	regulation of macrophage proliferation	7	2	0.00215641	THCA
GO:0120041	BP	positive regulation of macrophage proliferation	7	2	0.00215641	THCA
GO:0051985	BP	negative regulation of chromosome segregation	52	4	0.00220347	THCA
GO:1905819	BP	negative regulation of chromosome separation	52	4	0.00220347	THCA
GO:0040017	BP	positive regulation of locomotion	585	17	0.00223231	THCA
GO:1901978	BP	positive regulation of cell cycle checkpoint	19	3	0.00229984	THCA
GO:0070661	BP	leukocyte proliferation	326	10	0.00246417	THCA
GO:0030309	BP	poly-N-acetyllactosamine metabolic process	9	2	0.00248918	THCA
GO:0090315	BP	negative regulation of protein targeting to membrane	6	2	0.00253292	THCA
GO:0045936	BP	negative regulation of phosphate metabolic process	429	14	0.00256677	THCA
GO:0010761	BP	fibroblast migration	55	5	0.0025728	THCA
GO:0036211	BP	protein modification process	3487	60	0.0025748	THCA
GO:0010563	BP	negative regulation of phosphorus metabolic process	430	14	0.0025897	THCA
GO:0033047	BP	regulation of mitotic sister chromatid segregation	55	4	0.00261339	THCA
GO:0051256	BP	mitotic spindle midzone assembly	11	2	0.00264421	THCA
GO:0002440	BP	production of molecular mediator of immune response	228	8	0.00269575	THCA
GO:0045584	BP	negative regulation of cytotoxic T cell differentiation	1	1	0.00271288	THCA
GO:0098752	CC	integral component of the cytoplasmic side of the plasma membrane	1	1	0.00271288	THCA
GO:0046330	BP	positive regulation of JNK cascade	95	6	0.00274605	THCA
GO:0047196	MF	long-chain-alcohol O-fatty-acyltransferase activity	2	1	0.00280479	THCA
GO:0102966	MF	arachidoyl-CoA:1-dodecanol O-acyltransferase activity	2	1	0.00280479	THCA
GO:0032740	BP	positive regulation of interleukin-17 production	27	3	0.00283576	THCA
GO:0007254	BP	JNK cascade	170	8	0.00297808	THCA
GO:0002704	BP	negative regulation of leukocyte mediated immunity	64	4	0.00304548	THCA
GO:0003823	MF	antigen binding	52	4	0.00307659	THCA
GO:1901976	BP	regulation of cell cycle checkpoint	48	4	0.00308109	THCA
GO:0002819	BP	regulation of adaptive immune response	188	7	0.00324313	THCA
GO:0045839	BP	negative regulation of mitotic nuclear division	56	4	0.00332253	THCA
GO:0005160	MF	transforming growth factor beta receptor binding	23	3	0.00338228	THCA
GO:0004656	MF	procollagen-proline 4-dioxygenase activity	5	2	0.00346313	THCA
GO:0043408	BP	regulation of MAPK cascade	677	18	0.00347627	THCA
GO:0031399	BP	regulation of protein modification process	1521	32	0.00353942	THCA
GO:0031333	BP	negative regulation of protein-containing complex assembly	138	7	0.0036402	THCA
GO:0060312	BP	regulation of blood vessel remodeling	12	2	0.00374771	THCA
GO:0140105	BP	interleukin-10-mediated signaling pathway	2	1	0.00394122	THCA
GO:0008843	MF	endochitinase activity	1	1	0.00398283	THCA
GO:0016772	MF	transferase activity, transferring phosphorus-containing groups	851	22	0.00398829	THCA
GO:0060396	BP	growth hormone receptor signaling pathway	21	3	0.00407865	THCA
GO:0071378	BP	cellular response to growth hormone stimulus	21	3	0.00407865	THCA
GO:0002460	BP	adaptive immune response based on somatic recombination of immune receptors built from immunoglobulin superfamily domains	284	9	0.00434279	THCA
GO:0018423	MF	protein C-terminal leucine carboxyl O-methyltransferase activity	1	1	0.0043554	THCA
GO:0008296	MF	3'-5'-exodeoxyribonuclease activity	13	2	0.00445507	THCA
GO:0002698	BP	negative regulation of immune effector process	117	5	0.00448953	THCA
GO:0009595	BP	detection of biotic stimulus	35	3	0.00453992	THCA
GO:0051897	BP	positive regulation of protein kinase B signaling	118	6	0.00469972	THCA
GO:0043085	BP	positive regulation of catalytic activity	1135	26	0.00471125	THCA
GO:0016301	MF	kinase activity	710	20	0.00496557	THCA
GO:0070723	BP	response to cholesterol	27	3	0.00499898	THCA
GO:1905476	BP	negative regulation of protein localization to membrane	33	3	0.00510045	THCA
GO:0032620	BP	interleukin-17 production	47	3	0.00525267	THCA
GO:0032660	BP	regulation of interleukin-17 production	47	3	0.00525267	THCA
GO:0010632	BP	regulation of epithelial cell migration	284	10	0.0053135	THCA
GO:0000022	BP	mitotic spindle elongation	12	2	0.0053504	THCA
GO:0002706	BP	regulation of lymphocyte mediated immunity	168	6	0.00536441	THCA
GO:0006639	BP	acylglycerol metabolic process	129	6	0.00536767	THCA
GO:0030234	MF	enzyme regulator activity	1192	26	0.00539633	THCA
GO:0032872	BP	regulation of stress-activated MAPK cascade	192	8	0.00540005	THCA
GO:0051987	BP	positive regulation of attachment of spindle microtubules to kinetochore	11	2	0.00550751	THCA
GO:0043410	BP	positive regulation of MAPK cascade	484	14	0.00560312	THCA
GO:0010369	CC	chromocenter	14	2	0.00563233	THCA
GO:0098772	MF	molecular function regulator activity	1877	35	0.00565168	THCA
GO:0006638	BP	neutral lipid metabolic process	130	6	0.00568067	THCA
GO:0005126	MF	cytokine receptor binding	239	7	0.00573969	THCA
GO:0008499	MF	UDP-galactose:beta-N-acetylglucosamine beta-1,3-galactosyltransferase activity	12	2	0.00579102	THCA
GO:0051246	BP	regulation of protein metabolic process	2571	44	0.00582378	THCA
GO:0002449	BP	lymphocyte mediated immunity	272	8	0.00582764	THCA
GO:0016773	MF	phosphotransferase activity, alcohol group as acceptor	659	19	0.00586664	THCA
GO:0004672	MF	protein kinase activity	554	17	0.00588405	THCA
GO:0070302	BP	regulation of stress-activated protein kinase signaling cascade	195	8	0.00597925	THCA
GO:0044245	BP	polysaccharide digestion	2	1	0.00606357	THCA
GO:0000165	BP	MAPK cascade	772	19	0.00611996	THCA
GO:0046462	BP	monoacylglycerol metabolic process	14	2	0.0061675	THCA
GO:0003697	MF	single-stranded DNA binding	123	5	0.0061855	THCA
GO:1905115	BP	regulation of lateral attachment of mitotic spindle microtubules to kinetochore	1	1	0.00624407	THCA
GO:1905116	BP	positive regulation of lateral attachment of mitotic spindle microtubules to kinetochore	1	1	0.00624407	THCA
GO:0061517	BP	macrophage proliferation	11	2	0.00626227	THCA
GO:0042098	BP	T cell proliferation	207	7	0.00627049	THCA
GO:0031545	MF	peptidyl-proline 4-dioxygenase activity	8	2	0.00638807	THCA
GO:0001109	BP	promoter clearance during DNA-templated transcription	1	1	0.00649674	THCA
GO:0001111	BP	RNA polymerase II promoter clearance	1	1	0.00649674	THCA
GO:0010659	BP	cardiac muscle cell apoptotic process	54	4	0.00658886	THCA
GO:0061514	BP	interleukin-34-mediated signaling pathway	1	1	0.00660863	THCA
GO:0030695	MF	GTPase regulator activity	457	15	0.00661935	THCA
GO:0060589	MF	nucleoside-triphosphatase regulator activity	457	15	0.00661935	THCA
GO:0051231	BP	spindle elongation	14	2	0.0068092	THCA
GO:0033343	BP	positive regulation of collagen binding	1	1	0.00693552	THCA
GO:0048531	MF	beta-1,3-galactosyltransferase activity	14	2	0.0071183	THCA
GO:0002369	BP	T cell cytokine production	35	3	0.00728208	THCA
GO:0002724	BP	regulation of T cell cytokine production	35	3	0.00728208	THCA
GO:0036143	MF	kringle domain binding	1	1	0.00735001	THCA
GO:0006468	BP	protein phosphorylation	1517	32	0.00737617	THCA
GO:0072210	BP	metanephric nephron development	41	4	0.0074172	THCA
GO:0061304	BP	retinal blood vessel morphogenesis	6	2	0.00747122	THCA
GO:0001932	BP	regulation of protein phosphorylation	1071	24	0.0075311	THCA
GO:0019798	MF	procollagen-proline dioxygenase activity	8	2	0.00756771	THCA
GO:0045785	BP	positive regulation of cell adhesion	475	14	0.00761418	THCA
GO:0010902	BP	positive regulation of very-low-density lipoprotein particle remodeling	2	1	0.007629	THCA
GO:0010657	BP	muscle cell apoptotic process	90	5	0.00769351	THCA
GO:0018401	BP	peptidyl-proline hydroxylation to 4-hydroxy-L-proline	10	2	0.00769431	THCA
GO:1902533	BP	positive regulation of intracellular signal transduction	991	22	0.00774994	THCA
GO:0071144	CC	heteromeric SMAD protein complex	8	2	0.00781276	THCA
GO:0030293	MF	transmembrane receptor protein tyrosine kinase inhibitor activity	2	1	0.00783989	THCA
GO:0036314	BP	response to sterol	32	3	0.00792709	THCA
GO:0019538	BP	protein metabolic process	5249	76	0.00792955	THCA
GO:0010658	BP	striated muscle cell apoptotic process	56	4	0.00800128	THCA
GO:0002381	BP	immunoglobulin production involved in immunoglobulin-mediated immune response	68	4	0.00807941	THCA
GO:0046503	BP	glycerolipid catabolic process	67	4	0.00819728	THCA
GO:0051255	BP	spindle midzone assembly	14	2	0.00842355	THCA
GO:0016740	MF	transferase activity	2133	38	0.00852207	THCA
GO:0070665	BP	positive regulation of leukocyte proliferation	164	6	0.00853484	THCA
GO:0071659	BP	negative regulation of IP-10 production	4	1	0.00857435	THCA
GO:0060242	BP	contact inhibition	9	2	0.00859921	THCA
GO:0060395	BP	SMAD protein signal transduction	82	5	0.00876566	THCA
GO:0010595	BP	positive regulation of endothelial cell migration	127	6	0.00877583	THCA
GO:2000524	BP	negative regulation of T cell costimulation	3	1	0.00877605	THCA
GO:0008608	BP	attachment of spindle microtubules to kinetochore	43	3	0.0087926	THCA
GO:0016835	MF	carbon-oxygen lyase activity	76	4	0.00881348	THCA
GO:0000805	CC	X chromosome	10	2	0.00887729	THCA
GO:0031400	BP	negative regulation of protein modification process	509	14	0.00894169	THCA
GO:0018107	BP	peptidyl-threonine phosphorylation	110	6	0.00901085	THCA
GO:0060245	BP	detection of cell density	10	2	0.00901638	THCA
GO:1903720	BP	negative regulation of I-kappaB phosphorylation	2	1	0.00905976	THCA
GO:0046777	BP	protein autophosphorylation	225	9	0.0091063	THCA
GO:0043956	MF	3-hydroxypropionyl-CoA dehydratase activity	1	1	0.00914896	THCA
GO:0015669	BP	gas transport	22	2	0.00919775	THCA
GO:0010800	BP	positive regulation of peptidyl-threonine phosphorylation	29	3	0.00922418	THCA
GO:1904931	MF	MCM complex binding	1	1	0.00950336	THCA
GO:0033674	BP	positive regulation of kinase activity	472	14	0.00960937	THCA
GO:0002700	BP	regulation of production of molecular mediator of immune response	180	6	0.00994442	THCA
GO:0043406	BP	positive regulation of MAP kinase activity	115	6	0.00994739	THCA
GO:0051451	BP	myoblast migration	13	2	0.00996709	THCA
GO:0045860	BP	positive regulation of protein kinase activity	396	12	0.010085	THCA
GO:0002718	BP	regulation of cytokine production involved in immune response	114	5	0.0101314	THCA
GO:0046329	BP	negative regulation of JNK cascade	38	3	0.0102821	THCA
GO:0002367	BP	cytokine production involved in immune response	116	5	0.0103033	THCA
GO:0042129	BP	regulation of T cell proliferation	177	6	0.0103755	THCA
GO:0071902	BP	positive regulation of protein serine/threonine kinase activity	210	8	0.0104817	THCA
GO:0032874	BP	positive regulation of stress-activated MAPK cascade	129	6	0.0105632	THCA
GO:0006796	BP	phosphate-containing compound metabolic process	2699	47	0.0107223	THCA
GO:0007371	BP	ventral midline determination	1	1	0.0107325	THCA
GO:0072036	BP	mesenchymal to epithelial transition involved in renal vesicle formation	1	1	0.0107325	THCA
GO:0072285	BP	mesenchymal to epithelial transition involved in metanephric renal vesicle formation	1	1	0.0107325	THCA
GO:0072687	CC	meiotic spindle	14	2	0.0107829	THCA
GO:0060416	BP	response to growth hormone	33	3	0.0108339	THCA
GO:0002144	CC	cytosolic tRNA wobble base thiouridylase complex	1	1	0.0109864	THCA
GO:0010759	BP	positive regulation of macrophage chemotaxis	19	2	0.0110351	THCA
GO:0000806	CC	Y chromosome	2	1	0.0110472	THCA
GO:0048295	BP	positive regulation of isotype switching to IgE isotypes	4	1	0.0110979	THCA
GO:0030258	BP	lipid modification	210	7	0.0112291	THCA
GO:0060397	BP	growth hormone receptor signaling pathway via JAK-STAT	10	2	0.0113331	THCA
GO:0031253	CC	cell projection membrane	342	11	0.0113782	THCA
GO:0044093	BP	positive regulation of molecular function	1527	31	0.0114562	THCA
GO:0070304	BP	positive regulation of stress-activated protein kinase signaling cascade	131	6	0.0115239	THCA
GO:0071141	CC	SMAD protein complex	9	2	0.0115927	THCA
GO:0008432	MF	JUN kinase binding	9	2	0.0116504	THCA
GO:0030917	BP	midbrain-hindbrain boundary development	7	2	0.0116913	THCA
GO:0033135	BP	regulation of peptidyl-serine phosphorylation	127	6	0.0117698	THCA
GO:1990385	CC	meiotic spindle midzone	1	1	0.0117803	THCA
GO:0031543	MF	peptidyl-proline dioxygenase activity	12	2	0.0118264	THCA
GO:0048534	BP	hematopoietic or lymphoid organ development	940	21	0.0120401	THCA
GO:0004529	MF	exodeoxyribonuclease activity	24	2	0.0120635	THCA
GO:0016895	MF	exodeoxyribonuclease activity, producing 5'-phosphomonoesters	24	2	0.0120635	THCA
GO:0050252	MF	retinol O-fatty-acyltransferase activity	3	1	0.0120746	THCA
GO:0005976	BP	polysaccharide metabolic process	108	5	0.0121099	THCA
GO:0051247	BP	positive regulation of protein metabolic process	1455	28	0.0123081	THCA
GO:0051347	BP	positive regulation of transferase activity	562	15	0.0123416	THCA
GO:0001618	MF	virus receptor activity	73	4	0.0123425	THCA
GO:0140096	MF	catalytic activity, acting on a protein	2147	38	0.0124507	THCA
GO:0006793	BP	phosphorus metabolic process	2725	47	0.0125615	THCA
GO:0140272	MF	exogenous protein binding	74	4	0.0126133	THCA
GO:0070932	BP	histone H3 deacetylation	13	2	0.012901	THCA
GO:0046461	BP	neutral lipid catabolic process	41	3	0.0130028	THCA
GO:0046464	BP	acylglycerol catabolic process	41	3	0.0130028	THCA
GO:0018210	BP	peptidyl-threonine modification	119	6	0.013049	THCA
GO:0060230	MF	lipoprotein lipase activator activity	4	1	0.0130771	THCA
GO:0007494	BP	midgut development	11	2	0.0130797	THCA
GO:0007182	BP	common-partner SMAD protein phosphorylation	7	2	0.0130995	THCA
GO:0001657	BP	ureteric bud development	97	6	0.0131691	THCA
GO:0051988	BP	regulation of attachment of spindle microtubules to kinetochore	18	2	0.0132308	THCA
GO:0000281	BP	mitotic cytokinesis	84	4	0.0132534	THCA
GO:0007080	BP	mitotic metaphase plate congression	56	3	0.0133378	THCA
GO:0002376	BP	immune system process	2453	39	0.0134156	THCA
GO:0072163	BP	mesonephric epithelium development	98	6	0.0134545	THCA
GO:0072164	BP	mesonephric tubule development	98	6	0.0134545	THCA
GO:0030184	MF	nitric oxide transmembrane transporter activity	1	1	0.0135278	THCA
GO:0072020	BP	proximal straight tubule development	1	1	0.0135278	THCA
GO:0072022	BP	descending thin limb development	1	1	0.0135278	THCA
GO:0072032	BP	proximal convoluted tubule segment 2 development	1	1	0.0135278	THCA
GO:0072220	BP	metanephric descending thin limb development	1	1	0.0135278	THCA
GO:0072230	BP	metanephric proximal straight tubule development	1	1	0.0135278	THCA
GO:0072232	BP	metanephric proximal convoluted tubule segment 2 development	1	1	0.0135278	THCA
GO:0030042	BP	actin filament depolymerization	57	4	0.0135823	THCA
GO:0016310	BP	phosphorylation	1781	35	0.0138051	THCA
GO:0016064	BP	immunoglobulin mediated immune response	133	5	0.0139266	THCA
GO:0017124	MF	SH3 domain binding	123	6	0.0140067	THCA
GO:0072538	BP	T-helper 17 type immune response	43	3	0.0140901	THCA
GO:0031401	BP	positive regulation of protein modification process	971	21	0.0141164	THCA
GO:0030849	CC	autosome	2	1	0.0141774	THCA
GO:0002250	BP	adaptive immune response	416	10	0.0142542	THCA
GO:1903725	BP	regulation of phospholipid metabolic process	37	3	0.0145954	THCA
GO:0007165	BP	signal transduction	5667	84	0.0146214	THCA
GO:0005157	MF	macrophage colony-stimulating factor receptor binding	3	1	0.0146533	THCA
GO:0019724	BP	B cell mediated immunity	136	5	0.0146749	THCA
GO:0098856	BP	intestinal lipid absorption	23	2	0.0146902	THCA
GO:0019511	BP	peptidyl-proline hydroxylation	15	2	0.0148285	THCA
GO:1900024	BP	regulation of substrate adhesion-dependent cell spreading	60	4	0.0149252	THCA
GO:0034616	BP	response to laminar fluid shear stress	13	2	0.0150126	THCA
GO:0015173	MF	aromatic amino acid transmembrane transporter activity	11	2	0.0150323	THCA
GO:0102338	MF	3-oxo-lignoceronyl-CoA synthase activity	2	1	0.0152637	THCA
GO:0150115	BP	cell-substrate junction organization	101	6	0.0152763	THCA
GO:2000523	BP	regulation of T cell costimulation	5	1	0.0153134	THCA
GO:1901970	BP	positive regulation of mitotic sister chromatid separation	18	2	0.0154286	THCA
GO:0010873	BP	positive regulation of cholesterol esterification	4	1	0.0154604	THCA
GO:0071396	BP	cellular response to lipid	590	14	0.0157159	THCA
GO:0035378	BP	carbon dioxide transmembrane transport	2	1	0.0157162	THCA
GO:0035379	MF	carbon dioxide transmembrane transporter activity	2	1	0.0157162	THCA
GO:0071612	BP	IP-10 production	5	1	0.0157404	THCA
GO:0071658	BP	regulation of IP-10 production	5	1	0.0157404	THCA
GO:0051403	BP	stress-activated MAPK cascade	236	8	0.0158563	THCA
GO:0003880	MF	protein C-terminal carboxyl O-methyltransferase activity	2	1	0.0158679	THCA
GO:0006481	BP	C-terminal protein methylation	2	1	0.0158679	THCA
GO:1990518	MF	single-stranded 3'-5' DNA helicase activity	3	1	0.0158969	THCA
GO:0001823	BP	mesonephros development	102	6	0.0160109	THCA
GO:0042632	BP	cholesterol homeostasis	98	4	0.0160706	THCA
GO:0051716	BP	cellular response to stimulus	7140	100	0.0160735	THCA
GO:2001251	BP	negative regulation of chromosome organization	94	4	0.0160933	THCA
GO:0042326	BP	negative regulation of phosphorylation	372	11	0.0161385	THCA
GO:0150172	BP	regulation of phosphatidylcholine metabolic process	10	2	0.0161424	THCA
GO:0099607	BP	lateral attachment of mitotic spindle microtubules to kinetochore	2	1	0.0162283	THCA
GO:0055092	BP	sterol homeostasis	99	4	0.0162576	THCA
GO:0044241	BP	lipid digestion	23	2	0.0162937	THCA
GO:0071900	BP	regulation of protein serine/threonine kinase activity	372	11	0.0163513	THCA
GO:0061299	BP	retina vasculature morphogenesis in camera-type eye	11	2	0.0165206	THCA
GO:0021670	BP	lateral ventricle development	11	2	0.0169253	THCA
GO:0032682	BP	negative regulation of chemokine production	26	2	0.0169904	THCA
GO:0071674	BP	mononuclear cell migration	189	6	0.0171332	THCA
GO:0010025	BP	wax biosynthetic process	4	1	0.0171502	THCA
GO:0010166	BP	wax metabolic process	4	1	0.0171502	THCA
GO:0032387	BP	negative regulation of intracellular transport	61	3	0.0173235	THCA
GO:0002079	CC	inner acrosomal membrane	5	1	0.0174006	THCA
GO:0030334	BP	regulation of cell migration	989	22	0.0178937	THCA
GO:0032447	BP	protein urmylation	4	1	0.0179134	THCA
GO:0019903	MF	protein phosphatase binding	148	6	0.018086	THCA
GO:0042060	BP	wound healing	434	12	0.0180964	THCA
GO:0072001	BP	renal system development	315	11	0.0182192	THCA
GO:0018146	BP	keratan sulfate biosynthetic process	15	2	0.0183883	THCA
GO:0072019	BP	proximal convoluted tubule development	2	1	0.0185226	THCA
GO:0072229	BP	metanephric proximal convoluted tubule development	2	1	0.0185226	THCA
GO:0001933	BP	negative regulation of protein phosphorylation	332	10	0.018569	THCA
GO:0031098	BP	stress-activated protein kinase signaling cascade	243	8	0.0186136	THCA
GO:0002053	BP	positive regulation of mesenchymal cell proliferation	23	3	0.0188458	THCA
GO:0047223	MF	beta-1,3-galactosyl-O-glycosyl-glycoprotein beta-1,3-N-acetylglucosaminyltransferase activity	3	1	0.0189858	THCA
GO:0047372	MF	acylglycerol lipase activity	15	2	0.0190112	THCA
GO:0006933	BP	negative regulation of cell adhesion involved in substrate-bound cell migration	4	1	0.0190613	THCA
GO:0010771	BP	negative regulation of cell morphogenesis involved in differentiation	13	2	0.0192694	THCA
GO:1900025	BP	negative regulation of substrate adhesion-dependent cell spreading	13	2	0.0192694	THCA
GO:1904672	BP	regulation of somatic stem cell population maintenance	11	2	0.0193229	THCA
GO:0004568	MF	chitinase activity	4	1	0.0195312	THCA
GO:0051251	BP	positive regulation of lymphocyte activation	317	9	0.0195377	THCA
GO:0030071	BP	regulation of mitotic metaphase/anaphase transition	92	4	0.0195712	THCA
GO:0002824	BP	positive regulation of adaptive immune response based on somatic recombination of immune receptors built from immunoglobulin superfamily domains	108	4	0.0196551	THCA
GO:2001054	BP	negative regulation of mesenchymal cell apoptotic process	10	2	0.0196566	THCA
GO:1905523	BP	positive regulation of macrophage migration	25	2	0.0197741	THCA
GO:0002520	BP	immune system development	997	21	0.019809	THCA
GO:0071641	BP	negative regulation of macrophage inflammatory protein 1 alpha production	3	1	0.0198271	THCA
GO:0004860	MF	protein kinase inhibitor activity	69	4	0.0198427	THCA
GO:0015801	BP	aromatic amino acid transport	14	2	0.0201208	THCA
GO:0033341	BP	regulation of collagen binding	2	1	0.0201276	THCA
GO:0001935	BP	endothelial cell proliferation	193	6	0.0202574	THCA
GO:0010901	BP	regulation of very-low-density lipoprotein particle remodeling	6	1	0.0202592	THCA
GO:0007093	BP	mitotic cell cycle checkpoint signaling	141	5	0.0202758	THCA
GO:0007183	BP	SMAD protein complex assembly	13	2	0.0203128	THCA
GO:0002669	BP	positive regulation of T cell anergy	5	1	0.0204842	THCA
GO:0002913	BP	positive regulation of lymphocyte anergy	5	1	0.0204842	THCA
GO:0019902	MF	phosphatase binding	194	7	0.0205635	THCA
GO:0072073	BP	kidney epithelium development	145	7	0.0209863	THCA
GO:0042102	BP	positive regulation of T cell proliferation	104	4	0.0210135	THCA
GO:0002703	BP	regulation of leukocyte mediated immunity	229	6	0.0210661	THCA
GO:0019899	MF	enzyme binding	2031	37	0.021147	THCA
GO:0032609	BP	interferon-gamma production	113	4	0.0211517	THCA
GO:0032649	BP	regulation of interferon-gamma production	113	4	0.0211517	THCA
GO:0034185	MF	apolipoprotein binding	17	2	0.0212698	THCA
GO:0007091	BP	metaphase/anaphase transition of mitotic cell cycle	95	4	0.0213514	THCA
GO:0051984	BP	positive regulation of chromosome segregation	25	2	0.0214112	THCA
GO:0019210	MF	kinase inhibitor activity	73	4	0.0214551	THCA
GO:0014006	BP	regulation of microglia differentiation	1	1	0.0215114	THCA
GO:0014008	BP	positive regulation of microglia differentiation	1	1	0.0215114	THCA
GO:1905313	BP	transforming growth factor beta receptor signaling pathway involved in heart development	1	1	0.0215114	THCA
GO:0042339	BP	keratan sulfate metabolic process	17	2	0.0215674	THCA
GO:0002285	BP	lymphocyte activation involved in immune response	189	6	0.0216775	THCA
GO:0071732	BP	cellular response to nitric oxide	17	2	0.0217528	THCA
GO:0010965	BP	regulation of mitotic sister chromatid separation	97	4	0.0217593	THCA
GO:0010631	BP	epithelial cell migration	357	10	0.0217618	THCA
GO:0042325	BP	regulation of phosphorylation	1210	25	0.0217651	THCA
GO:0033628	BP	regulation of cell adhesion mediated by integrin	49	3	0.0218068	THCA
GO:0030185	BP	nitric oxide transport	5	1	0.0220558	THCA
GO:0003337	BP	mesenchymal to epithelial transition involved in metanephros morphogenesis	12	2	0.0221523	THCA
GO:0098840	BP	protein transport along microtubule	13	2	0.0224447	THCA
GO:0099118	BP	microtubule-based protein transport	13	2	0.0224447	THCA
GO:0010594	BP	regulation of endothelial cell migration	222	7	0.022505	THCA
GO:0060394	BP	negative regulation of pathway-restricted SMAD protein phosphorylation	12	2	0.0226243	THCA
GO:0002143	BP	tRNA wobble position uridine thiolation	4	1	0.0227573	THCA
GO:0014731	CC	spectrin-associated cytoskeleton	9	2	0.0227884	THCA
GO:0002456	BP	T cell mediated immunity	104	4	0.0228382	THCA
GO:0102337	MF	3-oxo-cerotoyl-CoA synthase activity	2	1	0.0228518	THCA
GO:0090132	BP	epithelium migration	359	10	0.0228599	THCA
GO:0060228	MF	phosphatidylcholine-sterol O-acyltransferase activator activity	6	1	0.0230143	THCA
GO:0008047	MF	enzyme activator activity	524	13	0.0230621	THCA
GO:0032873	BP	negative regulation of stress-activated MAPK cascade	49	3	0.0230887	THCA
GO:0070303	BP	negative regulation of stress-activated protein kinase signaling cascade	49	3	0.0230887	THCA
GO:0051781	BP	positive regulation of cell division	89	4	0.0232113	THCA
GO:0051693	BP	actin filament capping	39	3	0.0233318	THCA
GO:0002697	BP	regulation of immune effector process	362	8	0.0236355	THCA
GO:1902099	BP	regulation of metaphase/anaphase transition of cell cycle	95	4	0.0237317	THCA
GO:0102336	MF	3-oxo-arachidoyl-CoA synthase activity	3	1	0.023804	THCA
GO:0090307	BP	mitotic spindle assembly	73	3	0.0240233	THCA
GO:0051306	BP	mitotic sister chromatid separation	100	4	0.0241365	THCA
GO:0021903	BP	rostrocaudal neural tube patterning	11	2	0.0241545	THCA
GO:0048732	BP	gland development	438	13	0.0241747	THCA
GO:0031106	BP	septin ring organization	2	1	0.0242029	THCA
GO:0002334	BP	transitional two stage B cell differentiation	1	1	0.0245877	THCA
GO:0038173	BP	interleukin-17A-mediated signaling pathway	1	1	0.0245877	THCA
GO:0110012	BP	protein localization to P-body	1	1	0.0245877	THCA
GO:0090130	BP	tissue migration	364	10	0.0246445	THCA
GO:0045918	BP	negative regulation of cytolysis	3	1	0.0248962	THCA
GO:0034227	BP	tRNA thio-modification	5	1	0.0249665	THCA
GO:0071280	BP	cellular response to copper ion	26	2	0.0250072	THCA
GO:0002534	BP	cytokine production involved in inflammatory response	74	3	0.0251635	THCA
GO:1900015	BP	regulation of cytokine production involved in inflammatory response	74	3	0.0251635	THCA
GO:0002821	BP	positive regulation of adaptive immune response	114	4	0.0252482	THCA
GO:0045651	BP	positive regulation of macrophage differentiation	16	2	0.025295	THCA
GO:1900016	BP	negative regulation of cytokine production involved in inflammatory response	37	2	0.0253745	THCA
GO:0065009	BP	regulation of molecular function	3000	50	0.0255382	THCA
GO:0071731	BP	response to nitric oxide	21	2	0.0257007	THCA
GO:0031418	MF	L-ascorbic acid binding	20	2	0.025702	THCA
GO:0044784	BP	metaphase/anaphase transition of cell cycle	98	4	0.0257317	THCA
GO:0003824	MF	catalytic activity	5231	70	0.0258073	THCA
GO:0050896	BP	response to stimulus	8449	112	0.0258477	THCA
GO:0098754	BP	detoxification	147	4	0.0261542	THCA
GO:1900744	BP	regulation of p38MAPK cascade	44	3	0.0262267	THCA
GO:0071288	BP	cellular response to mercury ion	3	1	0.0262393	THCA
GO:0034368	BP	protein-lipid complex remodeling	30	2	0.0262903	THCA
GO:0034369	BP	plasma lipoprotein particle remodeling	30	2	0.0262903	THCA
GO:0004674	MF	protein serine/threonine kinase activity	419	12	0.0263247	THCA
GO:0001775	BP	cell activation	1039	20	0.0263616	THCA
GO:0045834	BP	positive regulation of lipid metabolic process	154	6	0.0264442	THCA
GO:0004165	MF	delta(3)-delta(2)-enoyl-CoA isomerase activity	4	1	0.0266204	THCA
GO:0032272	BP	negative regulation of protein polymerization	76	4	0.0267451	THCA
GO:0098529	BP	neuromuscular junction development, skeletal muscle fiber	1	1	0.0267766	THCA
GO:0035377	BP	transepithelial water transport	3	1	0.0268196	THCA
GO:0034333	BP	adherens junction assembly	13	2	0.0269436	THCA
GO:0050777	BP	negative regulation of immune response	182	5	0.0269648	THCA
GO:0001934	BP	positive regulation of protein phosphorylation	708	16	0.0270027	THCA
GO:2000145	BP	regulation of cell motility	1049	22	0.0270062	THCA
GO:0010660	BP	regulation of muscle cell apoptotic process	85	4	0.0270752	THCA
GO:1903041	BP	regulation of chondrocyte hypertrophy	1	1	0.027089	THCA
GO:1903043	BP	positive regulation of chondrocyte hypertrophy	1	1	0.027089	THCA
GO:0036155	BP	acylglycerol acyl-chain remodeling	4	1	0.0271087	THCA
GO:0002343	BP	peripheral B cell selection	2	1	0.0271998	THCA
GO:0002344	BP	B cell affinity maturation	2	1	0.0271998	THCA
GO:1901564	BP	organonitrogen compound metabolic process	6246	83	0.0272363	THCA
GO:0006640	BP	monoacylglycerol biosynthetic process	7	1	0.027242	THCA
GO:0072237	BP	metanephric proximal tubule development	3	1	0.0272577	THCA
GO:0002443	BP	leukocyte mediated immunity	366	8	0.0273324	THCA
GO:0002262	BP	myeloid cell homeostasis	168	6	0.0273613	THCA
GO:0150102	BP	negative regulation of monocyte activation	3	1	0.027424	THCA
GO:0045591	BP	positive regulation of regulatory T cell differentiation	23	2	0.0274506	THCA
GO:0043507	BP	positive regulation of JUN kinase activity	43	3	0.0274507	THCA
GO:0045583	BP	regulation of cytotoxic T cell differentiation	3	1	0.0275175	THCA
GO:0006950	BP	response to stress	3790	53	0.0275243	THCA
GO:0042268	BP	regulation of cytolysis	4	1	0.027663	THCA
GO:0002712	BP	regulation of B cell mediated immunity	61	3	0.0277893	THCA
GO:0002889	BP	regulation of immunoglobulin mediated immune response	61	3	0.0277893	THCA
GO:0006110	BP	regulation of glycolytic process	47	3	0.0277897	THCA
GO:0001817	BP	regulation of cytokine production	793	14	0.0279	THCA
GO:0034367	BP	protein-containing complex remodeling	32	2	0.0279441	THCA
GO:0038065	BP	collagen-activated signaling pathway	17	2	0.0279878	THCA
GO:0044262	BP	cellular carbohydrate metabolic process	290	8	0.0280211	THCA
GO:2000316	BP	regulation of T-helper 17 type immune response	30	2	0.0282648	THCA
GO:1901664	BP	regulation of NAD+ ADP-ribosyltransferase activity	3	1	0.0283776	THCA
GO:1901666	BP	positive regulation of NAD+ ADP-ribosyltransferase activity	3	1	0.0283776	THCA
GO:0071230	BP	cellular response to amino acid stimulus	75	4	0.0284364	THCA
GO:0042476	BP	odontogenesis	134	6	0.0286236	THCA
GO:0032816	BP	positive regulation of natural killer cell activation	23	2	0.0286979	THCA
GO:0051249	BP	regulation of lymphocyte activation	484	11	0.0288485	THCA
GO:0046889	BP	positive regulation of lipid biosynthetic process	88	4	0.0289192	THCA
GO:0035250	MF	UDP-galactosyltransferase activity	27	2	0.0293356	THCA
GO:0051338	BP	regulation of transferase activity	875	19	0.0296599	THCA
GO:0006030	BP	chitin metabolic process	6	1	0.0296609	THCA
GO:0006032	BP	chitin catabolic process	6	1	0.0296609	THCA
GO:0044242	BP	cellular lipid catabolic process	221	6	0.0298015	THCA
GO:0016836	MF	hydro-lyase activity	61	3	0.0298208	THCA
GO:0014850	BP	response to muscle activity	24	2	0.0298819	THCA
GO:0070411	MF	I-SMAD binding	14	2	0.0300222	THCA
GO:0021532	BP	neural tube patterning	39	3	0.0300725	THCA
GO:0010758	BP	regulation of macrophage chemotaxis	28	2	0.0301129	THCA
GO:2000612	BP	regulation of thyroid-stimulating hormone secretion	1	1	0.0301829	THCA
GO:0030835	BP	negative regulation of actin filament depolymerization	43	3	0.0302158	THCA
GO:0045830	BP	positive regulation of isotype switching	27	2	0.0305362	THCA
GO:1905820	BP	positive regulation of chromosome separation	27	2	0.0305577	THCA
GO:0051896	BP	regulation of protein kinase B signaling	184	6	0.0306495	THCA
GO:0090183	BP	regulation of kidney development	33	3	0.0306663	THCA
GO:1990402	BP	embryonic liver development	3	1	0.0306777	THCA
GO:0002699	BP	positive regulation of immune effector process	248	6	0.0306952	THCA
GO:0010665	BP	regulation of cardiac muscle cell apoptotic process	50	3	0.0307428	THCA
GO:0050921	BP	positive regulation of chemotaxis	139	5	0.030756	THCA
GO:0000086	BP	G2/M transition of mitotic cell cycle	142	5	0.0307787	THCA
GO:0031143	CC	pseudopodium	17	2	0.0308943	THCA
GO:0033627	BP	cell adhesion mediated by integrin	88	4	0.0313024	THCA
GO:0048535	BP	lymph node development	18	2	0.0314269	THCA
GO:0140097	MF	catalytic activity, acting on DNA	228	6	0.0316004	THCA
GO:0005178	MF	integrin binding	156	6	0.031625	THCA
GO:0046651	BP	lymphocyte proliferation	285	7	0.0317704	THCA
GO:0033045	BP	regulation of sister chromatid segregation	106	4	0.0318091	THCA
GO:2001053	BP	regulation of mesenchymal cell apoptotic process	13	2	0.0318194	THCA
GO:0008378	MF	galactosyltransferase activity	29	2	0.0319215	THCA
GO:0002286	BP	T cell activation involved in immune response	104	4	0.0320637	THCA
GO:0036018	BP	cellular response to erythropoietin	6	1	0.032124	THCA
GO:1905818	BP	regulation of chromosome separation	110	4	0.0321337	THCA
GO:0045859	BP	regulation of protein kinase activity	643	15	0.0321373	THCA
GO:0016706	MF	2-oxoglutarate-dependent dioxygenase activity	58	3	0.0322062	THCA
GO:0001816	BP	cytokine production	806	14	0.0324949	THCA
GO:0043322	BP	negative regulation of natural killer cell degranulation	1	1	0.0325701	THCA
GO:0055088	BP	lipid homeostasis	170	5	0.0326318	THCA
GO:0002339	BP	B cell selection	4	1	0.0327838	THCA
GO:1990959	BP	eosinophil homeostasis	3	1	0.0328315	THCA
GO:0002774	BP	Fc receptor mediated inhibitory signaling pathway	5	1	0.0328671	THCA
GO:0071650	BP	negative regulation of chemokine (C-C motif) ligand 5 production	5	1	0.0331108	THCA
GO:0042022	CC	interleukin-12 receptor complex	4	1	0.0331551	THCA
GO:0007528	BP	neuromuscular junction development	48	3	0.0332076	THCA
GO:0016052	BP	carbohydrate catabolic process	152	5	0.0333705	THCA
GO:0002377	BP	immunoglobulin production	117	4	0.0334542	THCA
GO:0030155	BP	regulation of cell adhesion	784	18	0.0335554	THCA
GO:0003846	MF	2-acylglycerol O-acyltransferase activity	7	1	0.0336573	THCA
GO:0043687	BP	post-translational protein modification	55	3	0.0336585	THCA
GO:0070560	BP	protein secretion by platelet	2	1	0.0338395	THCA
GO:0030950	BP	establishment or maintenance of actin cytoskeleton polarity	3	1	0.0338665	THCA
GO:0001822	BP	kidney development	306	10	0.0338762	THCA
GO:1905534	BP	positive regulation of leucine import across plasma membrane	1	1	0.0339322	THCA
GO:0018126	BP	protein hydroxylation	27	2	0.0339828	THCA
GO:0008201	MF	heparin binding	168	6	0.0340368	THCA
GO:0140416	MF	transcription regulator inhibitor activity	22	2	0.0341101	THCA
GO:0090068	BP	positive regulation of cell cycle process	253	7	0.0341252	THCA
GO:0016202	BP	regulation of striated muscle tissue development	17	2	0.0341693	THCA
GO:0010831	BP	positive regulation of myotube differentiation	17	2	0.0341854	THCA
GO:1901740	BP	negative regulation of myoblast fusion	3	1	0.0342324	THCA
GO:0120212	CC	sperm head-tail coupling apparatus	1	1	0.0344153	THCA
GO:0033344	BP	cholesterol efflux	71	3	0.0344323	THCA
GO:0002696	BP	positive regulation of leukocyte activation	363	9	0.0345483	THCA
GO:0014888	BP	striated muscle adaptation	55	3	0.034582	THCA
GO:0071675	BP	regulation of mononuclear cell migration	116	4	0.0345922	THCA
GO:0046866	BP	tetraterpenoid transport	1	1	0.0346155	THCA
GO:0046867	BP	carotenoid transport	1	1	0.0346155	THCA
GO:0072536	CC	interleukin-23 receptor complex	5	1	0.0348357	THCA
GO:0045007	BP	depurination	4	1	0.0349057	THCA
GO:0036017	BP	response to erythropoietin	7	1	0.0349421	THCA
GO:0016853	MF	isomerase activity	147	4	0.0352	THCA
GO:0010801	BP	negative regulation of peptidyl-threonine phosphorylation	19	2	0.0353232	THCA
GO:0047453	MF	ATP-dependent NAD(P)H-hydrate dehydratase activity	1	1	0.035376	THCA
GO:0110051	BP	metabolite repair	1	1	0.035376	THCA
GO:0001655	BP	urogenital system development	357	11	0.0354076	THCA
GO:0032185	BP	septin cytoskeleton organization	4	1	0.035556	THCA
GO:0000801	CC	central element	8	1	0.035592	THCA
GO:0032943	BP	mononuclear cell proliferation	292	7	0.0356873	THCA
GO:0010662	BP	regulation of striated muscle cell apoptotic process	52	3	0.035878	THCA
GO:0010464	BP	regulation of mesenchymal cell proliferation	30	3	0.035879	THCA
GO:0016540	BP	protein autoprocessing	26	2	0.0361513	THCA
GO:0098732	BP	macromolecule deacylation	136	5	0.0362777	THCA
GO:0051310	BP	metaphase plate congression	70	3	0.036333	THCA
GO:0047325	MF	inositol tetrakisphosphate 1-kinase activity	1	1	0.0364664	THCA
GO:0052725	MF	inositol-1,3,4-trisphosphate 6-kinase activity	1	1	0.0364664	THCA
GO:0052726	MF	inositol-1,3,4-trisphosphate 5-kinase activity	1	1	0.0364664	THCA
GO:0012501	BP	programmed cell death	1919	33	0.0365559	THCA
GO:0051257	BP	meiotic spindle midzone assembly	2	1	0.0365614	THCA
GO:0006022	BP	aminoglycan metabolic process	133	5	0.0365644	THCA
GO:0090208	BP	positive regulation of triglyceride metabolic process	24	2	0.0368411	THCA
GO:0043470	BP	regulation of carbohydrate catabolic process	56	3	0.0368576	THCA
GO:0015819	BP	lysine transport	2	1	0.0369482	THCA
GO:0002694	BP	regulation of leukocyte activation	577	12	0.0370466	THCA
GO:0061640	BP	cytoskeleton-dependent cytokinesis	111	4	0.0373055	THCA
GO:0015920	BP	lipopolysaccharide transport	2	1	0.0373548	THCA
GO:0010830	BP	regulation of myotube differentiation	46	3	0.0374055	THCA
GO:0120093	BP	regulation of peptidyl-lysine crotonylation	1	1	0.0374896	THCA
GO:0120094	BP	negative regulation of peptidyl-lysine crotonylation	1	1	0.0374896	THCA
GO:0002249	BP	lymphocyte anergy	8	1	0.0375117	THCA
GO:0002667	BP	regulation of T cell anergy	8	1	0.0375117	THCA
GO:0002870	BP	T cell anergy	8	1	0.0375117	THCA
GO:0002911	BP	regulation of lymphocyte anergy	8	1	0.0375117	THCA
GO:0050679	BP	positive regulation of epithelial cell proliferation	221	7	0.0377828	THCA
GO:0070489	BP	T cell aggregation	2	1	0.0378838	THCA
GO:1990227	BP	paranodal junction maintenance	2	1	0.0380706	THCA
GO:0010656	BP	negative regulation of muscle cell apoptotic process	53	3	0.038151	THCA
GO:0044878	BP	mitotic cytokinesis checkpoint signaling	4	1	0.0382237	THCA
GO:0031673	CC	H zone	1	1	0.0383431	THCA
GO:0021592	BP	fourth ventricle development	1	1	0.0384403	THCA
GO:0021993	BP	initiation of neural tube closure	1	1	0.0384403	THCA
GO:0021501	BP	prechordal plate formation	1	1	0.0384821	THCA
GO:0021547	BP	midbrain-hindbrain boundary initiation	1	1	0.0384821	THCA
GO:0061326	BP	renal tubule development	98	5	0.0385324	THCA
GO:0046649	BP	lymphocyte activation	736	15	0.0386136	THCA
GO:1904556	BP	L-tryptophan transmembrane transport	2	1	0.0386419	THCA
GO:0002728	BP	negative regulation of natural killer cell cytokine production	2	1	0.0386573	THCA
GO:0071229	BP	cellular response to acid chemical	84	4	0.0387373	THCA
GO:1902894	BP	negative regulation of miRNA transcription	19	2	0.0387462	THCA
GO:0021556	BP	central nervous system formation	1	1	0.038763	THCA
GO:0002702	BP	positive regulation of production of molecular mediator of immune response	128	4	0.0387654	THCA
GO:0033141	BP	positive regulation of peptidyl-serine phosphorylation of STAT protein	6	1	0.0388918	THCA
GO:0016402	MF	pristanoyl-CoA oxidase activity	1	1	0.0389264	THCA
GO:0015168	MF	glycerol transmembrane transporter activity	7	1	0.0389339	THCA
GO:0015793	BP	glycerol transmembrane transport	7	1	0.0389339	THCA
GO:0061298	BP	retina vasculature development in camera-type eye	19	2	0.0390051	THCA
GO:1901706	BP	mesenchymal cell differentiation involved in bone development	2	1	0.0390268	THCA
GO:0005102	MF	signaling receptor binding	1402	25	0.0390911	THCA
GO:0009607	BP	response to biotic stimulus	1385	20	0.0390973	THCA
GO:0008457	MF	beta-galactosyl-N-acetylglucosaminylgalactosylglucosyl-ceramide beta-1,3-acetylglucosaminyltransferase activity	4	1	0.0391075	THCA
GO:0050865	BP	regulation of cell activation	634	13	0.0392528	THCA
GO:0051298	BP	centrosome duplication	72	3	0.0392809	THCA
GO:0140328	MF	floppase activity	16	2	0.0394073	THCA
GO:1903810	BP	L-histidine import across plasma membrane	2	1	0.0395187	THCA
GO:2000629	BP	negative regulation of miRNA metabolic process	20	2	0.0395643	THCA
GO:0051336	BP	regulation of hydrolase activity	982	19	0.0395895	THCA
GO:0010639	BP	negative regulation of organelle organization	352	9	0.0396511	THCA
GO:0000825	MF	inositol tetrakisphosphate 6-kinase activity	2	1	0.0396553	THCA
GO:0051765	MF	inositol tetrakisphosphate kinase activity	2	1	0.0396553	THCA
GO:0003908	MF	methylated-DNA-[protein]-cysteine S-methyltransferase activity	1	1	0.0399153	THCA
GO:0040012	BP	regulation of locomotion	1093	22	0.0401977	THCA
GO:0060816	BP	random inactivation of X chromosome	2	1	0.0402434	THCA
GO:0043549	BP	regulation of kinase activity	753	17	0.0402596	THCA
GO:0032497	BP	detection of lipopolysaccharide	4	1	0.040316	THCA
GO:1990706	CC	MAD1 complex	1	1	0.0403183	THCA
GO:2001255	BP	positive regulation of histone H3-K36 trimethylation	3	1	0.0403654	THCA
GO:0051155	BP	positive regulation of striated muscle cell differentiation	53	3	0.0406108	THCA
GO:0060644	BP	mammary gland epithelial cell differentiation	18	2	0.040611	THCA
GO:0007346	BP	regulation of mitotic cell cycle	513	11	0.0407403	THCA
GO:0015670	BP	carbon dioxide transport	14	1	0.0407435	THCA
GO:0050867	BP	positive regulation of cell activation	380	9	0.0407911	THCA
GO:0052746	BP	inositol phosphorylation	2	1	0.0408025	THCA
GO:0008219	BP	cell death	2079	35	0.0408659	THCA
GO:1903576	BP	response to L-arginine	3	1	0.0409637	THCA
GO:1903577	BP	cellular response to L-arginine	3	1	0.0409637	THCA
GO:0005607	CC	laminin-2 complex	2	1	0.0410605	THCA
GO:0010340	MF	carboxyl-O-methyltransferase activity	6	1	0.0410743	THCA
GO:0051998	MF	protein carboxyl O-methyltransferase activity	6	1	0.0410743	THCA
GO:0071963	BP	establishment or maintenance of cell polarity regulating cell shape	2	1	0.0411396	THCA
GO:0071071	BP	regulation of phospholipid biosynthetic process	18	2	0.0412085	THCA
GO:0005938	CC	cell cortex	309	10	0.0412095	THCA
GO:0030547	MF	signaling receptor inhibitor activity	29	2	0.0415	THCA
GO:0106310	MF	protein serine kinase activity	355	10	0.0416315	THCA
GO:0050670	BP	regulation of lymphocyte proliferation	233	6	0.0416397	THCA
GO:0097152	BP	mesenchymal cell apoptotic process	15	2	0.0417174	THCA
GO:0007044	BP	cell-substrate junction assembly	95	5	0.041747	THCA
GO:0072562	CC	blood microparticle	109	3	0.0417651	THCA
GO:1990953	BP	intramanchette transport	2	1	0.0418349	THCA
GO:0004996	MF	thyroid-stimulating hormone receptor activity	2	1	0.0421022	THCA
GO:0038194	BP	thyroid-stimulating hormone signaling pathway	2	1	0.0421022	THCA
GO:0055090	BP	acylglycerol homeostasis	40	2	0.0421109	THCA
GO:0070328	BP	triglyceride homeostasis	40	2	0.0421109	THCA
GO:0010716	BP	negative regulation of extracellular matrix disassembly	5	1	0.0422125	THCA
GO:0051146	BP	striated muscle cell differentiation	291	9	0.0423989	THCA
GO:1901739	BP	regulation of myoblast fusion	21	2	0.04252	THCA
GO:0001042	MF	RNA polymerase I core binding	4	1	0.0425746	THCA
GO:0042611	CC	MHC protein complex	20	2	0.0427334	THCA
GO:2000380	BP	regulation of mesoderm development	7	1	0.0427909	THCA
GO:2001044	BP	regulation of integrin-mediated signaling pathway	22	2	0.0428109	THCA
GO:0140066	BP	peptidyl-lysine crotonylation	2	1	0.042894	THCA
GO:0045589	BP	regulation of regulatory T cell differentiation	36	2	0.0429868	THCA
GO:0000416	BP	positive regulation of histone H3-K36 methylation	4	1	0.0430221	THCA
GO:0044839	BP	cell cycle G2/M phase transition	157	5	0.0430291	THCA
GO:0006915	BP	apoptotic process	1860	32	0.0430397	THCA
GO:0090190	BP	positive regulation of branching involved in ureteric bud morphogenesis	18	2	0.0431648	THCA
GO:0007159	BP	leukocyte cell-cell adhesion	400	9	0.0432299	THCA
GO:0010273	BP	detoxification of copper ion	14	1	0.0432361	THCA
GO:1990169	BP	stress response to copper ion	14	1	0.0432361	THCA
GO:0097186	BP	amelogenesis	25	2	0.0434168	THCA
GO:0033326	BP	cerebrospinal fluid secretion	3	1	0.0434553	THCA
GO:0110158	CC	calpain complex	3	1	0.0434577	THCA
GO:0002532	BP	production of molecular mediator involved in inflammatory response	94	3	0.0435362	THCA
GO:0070506	MF	high-density lipoprotein particle receptor activity	2	1	0.0435928	THCA
GO:0072234	BP	metanephric nephron tubule development	20	2	0.0436012	THCA
GO:0072283	BP	metanephric renal vesicle morphogenesis	15	2	0.0436228	THCA
GO:1901568	BP	fatty acid derivative metabolic process	70	3	0.0438216	THCA
GO:0015829	BP	valine transport	2	1	0.0438317	THCA
GO:0015196	MF	L-tryptophan transmembrane transporter activity	3	1	0.0439512	THCA
GO:0002767	BP	immune response-inhibiting cell surface receptor signaling pathway	8	1	0.0440036	THCA
GO:0030101	BP	natural killer cell activation	78	3	0.0440644	THCA
GO:0035518	BP	histone H2A monoubiquitination	23	2	0.0442669	THCA
GO:0001938	BP	positive regulation of endothelial cell proliferation	113	4	0.04428	THCA
GO:0072224	BP	metanephric glomerulus development	17	2	0.0444283	THCA
GO:0000803	CC	sex chromosome	31	2	0.0446352	THCA
GO:0002709	BP	regulation of T cell mediated immunity	84	3	0.0446474	THCA
GO:0150116	BP	regulation of cell-substrate junction organization	69	4	0.044721	THCA
GO:1903724	BP	positive regulation of centriole elongation	5	1	0.0449218	THCA
GO:0051153	BP	regulation of striated muscle cell differentiation	96	4	0.0449894	THCA
GO:0046332	MF	SMAD binding	76	4	0.044993	THCA
GO:0032967	BP	positive regulation of collagen biosynthetic process	26	2	0.045059	THCA
GO:0032480	BP	negative regulation of type I interferon production	33	2	0.0450974	THCA
GO:0032944	BP	regulation of mononuclear cell proliferation	237	6	0.0451517	THCA
GO:0001181	MF	RNA polymerase I general transcription initiation factor activity	5	1	0.045169	THCA
GO:0051142	BP	positive regulation of NK T cell proliferation	6	1	0.0452681	THCA
GO:0060819	BP	inactivation of X chromosome by genomic imprinting	2	1	0.0454908	THCA
GO:0015818	BP	isoleucine transport	2	1	0.0455117	THCA
GO:0005539	MF	glycosaminoglycan binding	231	7	0.045516	THCA
GO:1903510	BP	mucopolysaccharide metabolic process	94	4	0.0456396	THCA
GO:0010562	BP	positive regulation of phosphorus metabolic process	868	18	0.0457103	THCA
GO:0045937	BP	positive regulation of phosphate metabolic process	868	18	0.0457103	THCA
GO:0035331	BP	negative regulation of hippo signaling	13	2	0.0457569	THCA
GO:1990728	CC	mitotic spindle assembly checkpoint MAD1-MAD2 complex	2	1	0.0458647	THCA
GO:0070460	BP	thyroid-stimulating hormone secretion	3	1	0.0458823	THCA
GO:0010714	BP	positive regulation of collagen metabolic process	27	2	0.046038	THCA
GO:0007227	BP	signal transduction downstream of smoothened	3	1	0.0460917	THCA
GO:0007228	BP	positive regulation of hh target transcription factor activity	3	1	0.0460917	THCA
GO:0034714	MF	type III transforming growth factor beta receptor binding	3	1	0.0461075	THCA
GO:0032801	BP	receptor catabolic process	27	2	0.0461718	THCA
GO:0016042	BP	lipid catabolic process	331	7	0.0462684	THCA
GO:0007216	BP	G protein-coupled glutamate receptor signaling pathway	14	2	0.0463615	THCA
GO:0000287	MF	magnesium ion binding	218	6	0.0464365	THCA
GO:0043254	BP	regulation of protein-containing complex assembly	401	10	0.0464982	THCA
GO:0038066	BP	p38MAPK cascade	56	3	0.0467613	THCA
GO:0099038	MF	ceramide floppase activity	2	1	0.046768	THCA
GO:0099040	BP	ceramide translocation	2	1	0.046768	THCA
GO:0043534	BP	blood vessel endothelial cell migration	169	5	0.0469035	THCA
GO:0005152	MF	interleukin-1 receptor antagonist activity	3	1	0.047066	THCA
GO:0002252	BP	immune effector process	584	11	0.0473648	THCA
GO:0140078	MF	class I DNA-(apurinic or apyrimidinic site) endonuclease activity	7	1	0.0473714	THCA
GO:1901072	BP	glucosamine-containing compound catabolic process	9	1	0.0474291	THCA
GO:0002765	BP	immune response-inhibiting signal transduction	10	1	0.047442	THCA
GO:0060170	CC	ciliary membrane	75	3	0.04762	THCA
GO:0001648	MF	proteinase-activated receptor activity	5	1	0.0476209	THCA
GO:0015057	MF	thrombin-activated receptor activity	5	1	0.0476209	THCA
GO:0033138	BP	positive regulation of peptidyl-serine phosphorylation	93	4	0.0478096	THCA
GO:0034242	BP	negative regulation of syncytium formation by plasma membrane fusion	5	1	0.0478614	THCA
GO:0009966	BP	regulation of signal transduction	2966	50	0.047964	THCA
GO:0007352	BP	zygotic specification of dorsal/ventral axis	3	1	0.0480643	THCA
GO:0051983	BP	regulation of chromosome segregation	130	4	0.0481852	THCA
GO:0030834	BP	regulation of actin filament depolymerization	52	3	0.0483287	THCA
GO:0072243	BP	metanephric nephron epithelium development	23	2	0.0487217	THCA
GO:0045649	BP	regulation of macrophage differentiation	25	2	0.0487788	THCA
GO:0061180	BP	mammary gland epithelium development	68	4	0.0487887	THCA
GO:0043382	BP	positive regulation of memory T cell differentiation	9	1	0.0488481	THCA
GO:0006660	BP	phosphatidylserine catabolic process	4	1	0.0490055	THCA
GO:1903393	BP	positive regulation of adherens junction organization	2	1	0.0490794	THCA
GO:0039552	MF	RIG-I binding	3	1	0.0491101	THCA
GO:0008607	MF	phosphorylase kinase regulator activity	3	1	0.0491519	THCA
GO:0062232	BP	prostanoid catabolic process	3	1	0.0494463	THCA
GO:1905344	BP	prostaglandin catabolic process	3	1	0.0494463	THCA
GO:1902761	BP	positive regulation of chondrocyte development	2	1	0.0495199	THCA
GO:0022614	BP	membrane to membrane docking	5	1	0.0495759	THCA
GO:0002296	BP	T-helper 1 cell lineage commitment	4	1	0.0496364	THCA
GO:0031528	CC	microvillus membrane	28	2	0.0498608	THCA
GO:0071310	BP	cellular response to organic substance	2376	39	0.0498638	THCA

## Sheet: BLCA
ID	ONTOLOGY	TERM	N	DE	P.DE	Cancer
GO:0005829	CC	cytosol	5256	624	1.31509e-06	BLCA
GO:0003779	MF	actin binding	431	85	2.39242e-05	BLCA
GO:0008092	MF	cytoskeletal protein binding	980	157	4.49095e-05	BLCA
GO:0071559	BP	response to transforming growth factor beta	269	55	7.93472e-05	BLCA
GO:0071560	BP	cellular response to transforming growth factor beta stimulus	263	54	8.24458e-05	BLCA
GO:0061024	BP	membrane organization	793	117	8.70475e-05	BLCA
GO:0005925	CC	focal adhesion	419	78	0.000105667	BLCA
GO:0030055	CC	cell-substrate junction	429	79	0.000132418	BLCA
GO:0005905	CC	clathrin-coated pit	71	20	0.000176103	BLCA
GO:0005856	CC	cytoskeleton	2297	292	0.000210652	BLCA
GO:0007167	BP	enzyme-linked receptor protein signaling pathway	982	154	0.000232564	BLCA
GO:0032432	CC	actin filament bundle	78	23	0.00035695	BLCA
GO:0019901	MF	protein kinase binding	669	107	0.000386422	BLCA
GO:0003712	MF	transcription coregulator activity	488	81	0.000403191	BLCA
GO:0045296	MF	cadherin binding	330	59	0.000413965	BLCA
GO:0007178	BP	transmembrane receptor protein serine/threonine kinase signaling pathway	379	68	0.000603097	BLCA
GO:0001725	CC	stress fiber	70	21	0.000604953	BLCA
GO:0097517	CC	contractile actin filament bundle	70	21	0.000604953	BLCA
GO:0019900	MF	kinase binding	750	117	0.000674422	BLCA
GO:0043543	BP	protein acylation	262	45	0.00069082	BLCA
GO:0009966	BP	regulation of signal transduction	2956	380	0.000800041	BLCA
GO:0018210	BP	peptidyl-threonine modification	119	28	0.000883985	BLCA
GO:0090092	BP	regulation of transmembrane receptor protein serine/threonine kinase signaling pathway	283	53	0.000932385	BLCA
GO:0007179	BP	transforming growth factor beta receptor signaling pathway	210	41	0.000959191	BLCA
GO:0008134	MF	transcription factor binding	588	97	0.000964494	BLCA
GO:0042641	CC	actomyosin	77	22	0.000980744	BLCA
GO:0099023	CC	vesicle tethering complex	60	15	0.00104551	BLCA
GO:0030036	BP	actin cytoskeleton organization	715	117	0.00106834	BLCA
GO:1901033	BP	positive regulation of response to reactive oxygen species	9	5	0.00112101	BLCA
GO:1905206	BP	positive regulation of hydrogen peroxide-induced cell death	9	5	0.00112101	BLCA
GO:0030029	BP	actin filament-based process	804	129	0.00119029	BLCA
GO:0140346	MF	phosphatidylserine flippase activity	5	4	0.00122103	BLCA
GO:0005635	CC	nuclear envelope	470	69	0.00122491	BLCA
GO:0018393	BP	internal peptidyl-lysine acetylation	181	34	0.00122877	BLCA
GO:0003713	MF	transcription coactivator activity	270	48	0.00123374	BLCA
GO:0016573	BP	histone acetylation	176	33	0.00129182	BLCA
GO:0016922	MF	nuclear receptor binding	138	28	0.00130836	BLCA
GO:0005654	CC	nucleoplasm	4035	468	0.00133232	BLCA
GO:0070106	BP	interleukin-27-mediated signaling pathway	7	4	0.00133985	BLCA
GO:0048251	BP	elastic fiber assembly	11	6	0.00134051	BLCA
GO:0050839	MF	cell adhesion molecule binding	552	89	0.00135424	BLCA
GO:0046777	BP	protein autophosphorylation	225	44	0.00138634	BLCA
GO:0051019	MF	mitogen-activated protein kinase binding	28	10	0.00139262	BLCA
GO:0019904	MF	protein domain specific binding	681	106	0.00143216	BLCA
GO:0006473	BP	protein acetylation	221	39	0.00145436	BLCA
GO:0015629	CC	actin cytoskeleton	496	84	0.00147358	BLCA
GO:0043292	CC	contractile fiber	238	43	0.00149163	BLCA
GO:0006475	BP	internal protein amino acid acetylation	183	34	0.00157131	BLCA
GO:0043232	CC	intracellular non-membrane-bounded organelle	5336	586	0.00165647	BLCA
GO:0042297	BP	vocal learning	6	5	0.00166044	BLCA
GO:0098596	BP	imitative learning	6	5	0.00166044	BLCA
GO:0043228	CC	non-membrane-bounded organelle	5337	586	0.00168989	BLCA
GO:0018394	BP	peptidyl-lysine acetylation	192	35	0.00180013	BLCA
GO:0051294	BP	establishment of spindle orientation	40	12	0.00181522	BLCA
GO:0017124	MF	SH3 domain binding	123	27	0.00189407	BLCA
GO:0051342	BP	regulation of cyclic-nucleotide phosphodiesterase activity	10	5	0.00202862	BLCA
GO:0030010	BP	establishment of cell polarity	150	33	0.00213717	BLCA
GO:0090504	BP	epiboly	38	12	0.00223247	BLCA
GO:0031981	CC	nuclear lumen	4668	508	0.00239607	BLCA
GO:1902884	BP	positive regulation of response to oxidative stress	11	5	0.00242109	BLCA
GO:0048583	BP	regulation of response to stimulus	3892	466	0.00249669	BLCA
GO:0071363	BP	cellular response to growth factor stimulus	694	109	0.00250725	BLCA
GO:0031252	CC	cell leading edge	419	73	0.00253817	BLCA
GO:0042326	BP	negative regulation of phosphorylation	370	61	0.00254609	BLCA
GO:0010763	BP	positive regulation of fibroblast migration	17	8	0.00256592	BLCA
GO:0060040	BP	retinal bipolar neuron differentiation	3	3	0.00256899	BLCA
GO:0090100	BP	positive regulation of transmembrane receptor protein serine/threonine kinase signaling pathway	120	26	0.00262357	BLCA
GO:0030016	CC	myofibril	229	41	0.0026588	BLCA
GO:0018107	BP	peptidyl-threonine phosphorylation	110	25	0.00266543	BLCA
GO:0009893	BP	positive regulation of metabolic process	3751	453	0.00277454	BLCA
GO:0099080	CC	supramolecular complex	1333	165	0.00278023	BLCA
GO:0140288	CC	GBAF complex	14	6	0.00296897	BLCA
GO:0010604	BP	positive regulation of macromolecule metabolic process	3432	418	0.00299285	BLCA
GO:0032956	BP	regulation of actin cytoskeleton organization	354	60	0.00299886	BLCA
GO:1903053	BP	regulation of extracellular matrix organization	57	16	0.00307768	BLCA
GO:1903844	BP	regulation of cellular response to transforming growth factor beta stimulus	146	30	0.00309261	BLCA
GO:0070848	BP	response to growth factor	723	112	0.00309719	BLCA
GO:0030027	CC	lamellipodium	202	39	0.00313466	BLCA
GO:0071495	BP	cellular response to endogenous stimulus	1342	187	0.00332819	BLCA
GO:0022402	BP	cell cycle process	1230	155	0.00336206	BLCA
GO:0032970	BP	regulation of actin filament-based process	395	66	0.0035558	BLCA
GO:1903047	BP	mitotic cell cycle process	782	105	0.00389412	BLCA
GO:0097240	BP	chromosome attachment to the nuclear envelope	6	4	0.00397685	BLCA
GO:0045936	BP	negative regulation of phosphate metabolic process	427	67	0.0041134	BLCA
GO:0051254	BP	positive regulation of RNA metabolic process	1795	242	0.00411953	BLCA
GO:0017015	BP	regulation of transforming growth factor beta receptor signaling pathway	143	29	0.00412708	BLCA
GO:0015247	MF	aminophospholipid flippase activity	7	4	0.00417921	BLCA
GO:0140331	BP	aminophospholipid translocation	7	4	0.00417921	BLCA
GO:0010563	BP	negative regulation of phosphorus metabolic process	428	67	0.00431046	BLCA
GO:0090287	BP	regulation of cellular response to growth factor stimulus	329	57	0.00432131	BLCA
GO:0007163	BP	establishment or maintenance of cell polarity	234	44	0.00432654	BLCA
GO:0140297	MF	DNA-binding transcription factor binding	468	76	0.00440395	BLCA
GO:0051647	BP	nucleus localization	28	10	0.00443704	BLCA
GO:0098597	BP	observational learning	7	5	0.00462294	BLCA
GO:0010762	BP	regulation of fibroblast migration	40	12	0.00475354	BLCA
GO:0046966	MF	nuclear thyroid hormone receptor binding	29	8	0.0048236	BLCA
GO:0044319	BP	wound healing, spreading of cells	37	11	0.00502049	BLCA
GO:0090505	BP	epiboly involved in wound healing	37	11	0.00502049	BLCA
GO:0005656	CC	nuclear pre-replicative complex	2	2	0.00504586	BLCA
GO:0036387	CC	pre-replicative complex	2	2	0.00504586	BLCA
GO:0045893	BP	positive regulation of DNA-templated transcription	1647	225	0.00509385	BLCA
GO:1903508	BP	positive regulation of nucleic acid-templated transcription	1647	225	0.00509385	BLCA
GO:0030017	CC	sarcomere	210	37	0.00515065	BLCA
GO:0031325	BP	positive regulation of cellular metabolic process	3020	376	0.00520874	BLCA
GO:0016237	BP	lysosomal microautophagy	9	5	0.00522863	BLCA
GO:0018193	BP	peptidyl-amino acid modification	1231	163	0.00526446	BLCA
GO:0051173	BP	positive regulation of nitrogen compound metabolic process	3060	378	0.0053022	BLCA
GO:1902903	BP	regulation of supramolecular fiber organization	373	61	0.00532772	BLCA
GO:0031400	BP	negative regulation of protein modification process	507	76	0.00542009	BLCA
GO:0060389	BP	pathway-restricted SMAD protein phosphorylation	65	15	0.00551606	BLCA
GO:0036398	CC	TCR signalosome	2	2	0.00554093	BLCA
GO:1902680	BP	positive regulation of RNA biosynthetic process	1653	225	0.00568231	BLCA
GO:0061061	BP	muscle structure development	680	105	0.0057187	BLCA
GO:0044327	CC	dendritic spine head	8	4	0.00580005	BLCA
GO:0003714	MF	transcription corepressor activity	183	34	0.00582111	BLCA
GO:0004815	MF	aspartate-tRNA ligase activity	2	2	0.00593476	BLCA
GO:0006422	BP	aspartyl-tRNA aminoacylation	2	2	0.00593476	BLCA
GO:0006914	BP	autophagy	545	76	0.00598417	BLCA
GO:0061919	BP	process utilizing autophagic mechanism	545	76	0.00598417	BLCA
GO:0051649	BP	establishment of localization in cell	2037	247	0.00616352	BLCA
GO:0005760	CC	gamma DNA polymerase complex	2	2	0.00627542	BLCA
GO:0043007	BP	maintenance of rDNA	2	2	0.00678031	BLCA
GO:0003725	MF	double-stranded RNA binding	76	15	0.00700607	BLCA
GO:0000278	BP	mitotic cell cycle	935	120	0.00718591	BLCA
GO:0032233	BP	positive regulation of actin filament bundle assembly	62	15	0.00722969	BLCA
GO:0032870	BP	cellular response to hormone stimulus	577	85	0.00727372	BLCA
GO:0007010	BP	cytoskeleton organization	1468	195	0.00730603	BLCA
GO:0031092	CC	platelet alpha granule membrane	17	6	0.00743014	BLCA
GO:0044877	MF	protein-containing complex binding	1253	167	0.00745684	BLCA
GO:0006996	BP	organelle organization	3448	390	0.00755048	BLCA
GO:0045935	BP	positive regulation of nucleobase-containing compound metabolic process	1997	260	0.00762881	BLCA
GO:0001933	BP	negative regulation of protein phosphorylation	331	53	0.00766734	BLCA
GO:0060393	BP	regulation of pathway-restricted SMAD protein phosphorylation	61	14	0.0077949	BLCA
GO:0023051	BP	regulation of signaling	3353	418	0.00780091	BLCA
GO:0019899	MF	enzyme binding	2028	256	0.00808734	BLCA
GO:0040001	BP	establishment of mitotic spindle localization	38	10	0.00810399	BLCA
GO:0000768	BP	syncytium formation by plasma membrane fusion	62	15	0.008153	BLCA
GO:0140253	BP	cell-cell fusion	62	15	0.008153	BLCA
GO:0070877	CC	microprocessor complex	2	2	0.00839136	BLCA
GO:1903095	CC	ribonuclease III complex	2	2	0.00839136	BLCA
GO:0090555	MF	phosphatidylethanolamine flippase activity	7	4	0.00842162	BLCA
GO:0001730	MF	2'-5'-oligoadenylate synthetase activity	3	2	0.0084824	BLCA
GO:0070603	CC	SWI/SNF superfamily-type complex	90	18	0.00860174	BLCA
GO:0007166	BP	cell surface receptor signaling pathway	2678	331	0.0086331	BLCA
GO:0110057	BP	regulation of blood vessel endothelial cell differentiation	3	2	0.00867842	BLCA
GO:0099512	CC	supramolecular fiber	980	124	0.00886556	BLCA
GO:0010557	BP	positive regulation of macromolecule biosynthetic process	1864	245	0.00887543	BLCA
GO:0000132	BP	establishment of mitotic spindle orientation	33	9	0.00934762	BLCA
GO:0019955	MF	cytokine binding	135	22	0.00937468	BLCA
GO:0010646	BP	regulation of cell communication	3340	415	0.00943795	BLCA
GO:0051081	BP	nuclear membrane disassembly	11	5	0.00945944	BLCA
GO:1902905	BP	positive regulation of supramolecular fiber organization	175	32	0.00955123	BLCA
GO:0098598	BP	learned vocalization behavior or vocal learning	9	5	0.00956779	BLCA
GO:0010927	BP	cellular component assembly involved in morphogenesis	119	23	0.00974336	BLCA
GO:0014855	BP	striated muscle cell proliferation	78	18	0.00981374	BLCA
GO:0007169	BP	transmembrane receptor protein tyrosine kinase signaling pathway	625	95	0.00994257	BLCA
GO:0061629	MF	RNA polymerase II-specific DNA-binding transcription factor binding	347	56	0.00996743	BLCA
GO:0031399	BP	regulation of protein modification process	1515	192	0.0100422	BLCA
GO:0061448	BP	connective tissue development	269	48	0.0100687	BLCA
GO:0051293	BP	establishment of spindle localization	54	13	0.0101161	BLCA
GO:0036336	BP	dendritic cell migration	33	8	0.01024	BLCA
GO:0051496	BP	positive regulation of stress fiber assembly	52	13	0.0103624	BLCA
GO:0010761	BP	fibroblast migration	55	14	0.0103777	BLCA
GO:0034680	CC	integrin alpha10-beta1 complex	2	2	0.0104192	BLCA
GO:0044772	BP	mitotic cell cycle phase transition	468	65	0.0106455	BLCA
GO:0071659	BP	negative regulation of IP-10 production	4	2	0.0107217	BLCA
GO:0005085	MF	guanyl-nucleotide exchange factor activity	219	40	0.0108989	BLCA
GO:0051015	MF	actin filament binding	216	41	0.0109267	BLCA
GO:0005164	MF	tumor necrosis factor receptor binding	31	8	0.0109552	BLCA
GO:1904743	BP	negative regulation of telomeric DNA binding	2	2	0.0109632	BLCA
GO:0033002	BP	muscle cell proliferation	241	39	0.0110902	BLCA
GO:0099081	CC	supramolecular polymer	989	124	0.0111313	BLCA
GO:1901983	BP	regulation of protein acetylation	85	17	0.0112487	BLCA
GO:0000422	BP	autophagy of mitochondrion	92	18	0.0114569	BLCA
GO:0061726	BP	mitochondrion disassembly	92	18	0.0114569	BLCA
GO:1905962	BP	glutamatergic neuron differentiation	4	3	0.0115762	BLCA
GO:1903385	BP	regulation of homophilic cell adhesion	2	2	0.0115893	BLCA
GO:0015917	BP	aminophospholipid transport	9	4	0.0116368	BLCA
GO:0072583	BP	clathrin-dependent endocytosis	47	12	0.0116482	BLCA
GO:0007049	BP	cell cycle	1768	209	0.0117432	BLCA
GO:0030397	BP	membrane disassembly	12	5	0.0117627	BLCA
GO:0009719	BP	response to endogenous stimulus	1589	208	0.0118223	BLCA
GO:0006949	BP	syncytium formation	65	15	0.0118233	BLCA
GO:0008409	MF	5'-3' exonuclease activity	18	5	0.0118454	BLCA
GO:0055017	BP	cardiac muscle tissue growth	91	19	0.0120452	BLCA
GO:0009891	BP	positive regulation of biosynthetic process	2015	259	0.0120874	BLCA
GO:0032813	MF	tumor necrosis factor receptor superfamily binding	49	11	0.0121757	BLCA
GO:0007173	BP	epidermal growth factor receptor signaling pathway	108	21	0.0122899	BLCA
GO:1901143	BP	insulin catabolic process	3	2	0.012381	BLCA
GO:1904949	CC	ATPase complex	94	18	0.0124644	BLCA
GO:0006898	BP	receptor-mediated endocytosis	252	40	0.0128184	BLCA
GO:0016240	BP	autophagosome membrane docking	7	3	0.0128653	BLCA
GO:0071375	BP	cellular response to peptide hormone stimulus	295	47	0.013087	BLCA
GO:0010659	BP	cardiac muscle cell apoptotic process	54	12	0.0132626	BLCA
GO:0031328	BP	positive regulation of cellular biosynthetic process	1973	254	0.0133928	BLCA
GO:0032924	BP	activin receptor signaling pathway	45	11	0.0134334	BLCA
GO:0009896	BP	positive regulation of catabolic process	523	72	0.0135606	BLCA
GO:0005024	MF	transforming growth factor beta receptor activity	12	5	0.013744	BLCA
GO:0001954	BP	positive regulation of cell-matrix adhesion	56	13	0.0137585	BLCA
GO:0010810	BP	regulation of cell-substrate adhesion	219	39	0.0138026	BLCA
GO:0009894	BP	regulation of catabolic process	979	126	0.013946	BLCA
GO:0003183	BP	mitral valve morphogenesis	10	5	0.0146385	BLCA
GO:0032868	BP	response to insulin	263	42	0.0146631	BLCA
GO:0006897	BP	endocytosis	572	81	0.0147214	BLCA
GO:0003205	BP	cardiac chamber development	167	33	0.0148206	BLCA
GO:0031589	BP	cell-substrate adhesion	363	60	0.0148213	BLCA
GO:0051246	BP	regulation of protein metabolic process	2559	294	0.0150207	BLCA
GO:0044843	BP	cell cycle G1/S phase transition	275	41	0.0150773	BLCA
GO:0051653	BP	spindle localization	59	13	0.0154165	BLCA
GO:0046351	BP	disaccharide biosynthetic process	4	2	0.015527	BLCA
GO:0038127	BP	ERBB signaling pathway	123	23	0.0155753	BLCA
GO:0071889	MF	14-3-3 protein binding	31	10	0.0156087	BLCA
GO:0033197	BP	response to vitamin E	9	4	0.0156587	BLCA
GO:0048522	BP	positive regulation of cellular process	5465	632	0.0157573	BLCA
GO:0051301	BP	cell division	629	83	0.0157819	BLCA
GO:0009056	BP	catabolic process	2498	279	0.0158176	BLCA
GO:0016192	BP	vesicle-mediated transport	1501	188	0.0162231	BLCA
GO:0000938	CC	GARP complex	4	3	0.0162499	BLCA
GO:0042659	BP	regulation of cell fate specification	25	8	0.0163239	BLCA
GO:0048584	BP	positive regulation of response to stimulus	2130	252	0.01658	BLCA
GO:0051493	BP	regulation of cytoskeleton organization	524	77	0.0166193	BLCA
GO:0002407	BP	dendritic cell chemotaxis	26	6	0.016639	BLCA
GO:1904035	BP	regulation of epithelial cell apoptotic process	108	19	0.0169058	BLCA
GO:0031113	BP	regulation of microtubule polymerization	53	12	0.0169155	BLCA
GO:0051344	BP	negative regulation of cyclic-nucleotide phosphodiesterase activity	6	3	0.0170627	BLCA
GO:0033690	BP	positive regulation of osteoblast proliferation	13	5	0.0170899	BLCA
GO:2000401	BP	regulation of lymphocyte migration	65	12	0.0176689	BLCA
GO:0051641	BP	cellular localization	3256	379	0.01768	BLCA
GO:0046719	BP	regulation by virus of viral protein levels in host cell	7	3	0.0178369	BLCA
GO:0033300	MF	dehydroascorbic acid transmembrane transporter activity	8	3	0.017855	BLCA
GO:0070837	BP	dehydroascorbic acid transport	8	3	0.017855	BLCA
GO:0006998	BP	nuclear envelope organization	59	12	0.0178688	BLCA
GO:0032869	BP	cellular response to insulin stimulus	202	34	0.0181537	BLCA
GO:1990745	CC	EARP complex	4	3	0.0181763	BLCA
GO:0031048	BP	small non-coding RNA-dependent heterochromatin formation	2	2	0.0182083	BLCA
GO:0009642	BP	response to light intensity	16	5	0.0182182	BLCA
GO:0001223	MF	transcription coactivator binding	40	11	0.0183474	BLCA
GO:0042583	CC	chromaffin granule	13	5	0.0185121	BLCA
GO:1905205	BP	positive regulation of connective tissue replacement	11	3	0.0186127	BLCA
GO:0097435	BP	supramolecular fiber organization	793	111	0.018721	BLCA
GO:0000082	BP	G1/S transition of mitotic cell cycle	247	37	0.0187346	BLCA
GO:0051248	BP	negative regulation of protein metabolic process	1094	131	0.0190177	BLCA
GO:0061450	BP	trophoblast cell migration	16	5	0.0191481	BLCA
GO:0051928	BP	positive regulation of calcium ion transport	127	22	0.0192192	BLCA
GO:0010658	BP	striated muscle cell apoptotic process	56	12	0.0192517	BLCA
GO:0045294	MF	alpha-catenin binding	10	4	0.0194978	BLCA
GO:0030511	BP	positive regulation of transforming growth factor beta receptor signaling pathway	33	9	0.0195327	BLCA
GO:1903846	BP	positive regulation of cellular response to transforming growth factor beta stimulus	33	9	0.0195327	BLCA
GO:0098964	BP	anterograde dendritic transport of messenger ribonucleoprotein complex	2	2	0.019621	BLCA
GO:0060319	BP	primitive erythrocyte differentiation	5	3	0.0199681	BLCA
GO:0035032	CC	phosphatidylinositol 3-kinase complex, class III	6	3	0.0200087	BLCA
GO:0003174	BP	mitral valve development	11	5	0.0203293	BLCA
GO:1903008	BP	organelle disassembly	137	22	0.0204682	BLCA
GO:0048518	BP	positive regulation of biological process	6097	690	0.0204791	BLCA
GO:0060912	BP	cardiac cell fate specification	4	3	0.0204976	BLCA
GO:0048266	BP	behavioral response to pain	16	6	0.0205486	BLCA
GO:0097342	CC	ripoptosome	6	3	0.0208136	BLCA
GO:0004534	MF	5'-3' exoribonuclease activity	4	2	0.0208963	BLCA
GO:1903729	BP	regulation of plasma membrane organization	17	6	0.0209735	BLCA
GO:0044093	BP	positive regulation of molecular function	1525	193	0.0209773	BLCA
GO:0002011	BP	morphogenesis of an epithelial sheet	60	14	0.0209967	BLCA
GO:0035313	BP	wound healing, spreading of epidermal cells	22	7	0.0210441	BLCA
GO:0060038	BP	cardiac muscle cell proliferation	60	14	0.0210667	BLCA
GO:0032271	BP	regulation of protein polymerization	196	33	0.0210826	BLCA
GO:0032052	MF	bile acid binding	11	3	0.0210968	BLCA
GO:0048193	BP	Golgi vesicle transport	283	39	0.0212661	BLCA
GO:0140131	BP	positive regulation of lymphocyte chemotaxis	19	5	0.0213299	BLCA
GO:0016672	MF	oxidoreductase activity, acting on a sulfur group of donors, quinone or similar compound as acceptor	3	2	0.0213348	BLCA
GO:0010256	BP	endomembrane system organization	569	74	0.0215045	BLCA
GO:0046907	BP	intracellular transport	1523	180	0.0216532	BLCA
GO:0060419	BP	heart growth	100	20	0.021753	BLCA
GO:0014902	BP	myotube differentiation	127	25	0.0218129	BLCA
GO:0110053	BP	regulation of actin filament organization	269	44	0.0218239	BLCA
GO:0019184	BP	nonribosomal peptide biosynthetic process	17	5	0.0219145	BLCA
GO:0030554	MF	adenyl nucleotide binding	1512	193	0.0219926	BLCA
GO:0008286	BP	insulin receptor signaling pathway	117	22	0.0220733	BLCA
GO:0051345	BP	positive regulation of hydrolase activity	562	78	0.0220866	BLCA
GO:0031116	BP	positive regulation of microtubule polymerization	32	8	0.0221355	BLCA
GO:0007520	BP	myoblast fusion	48	12	0.0222143	BLCA
GO:0120228	CC	outer dynein arm docking complex	3	2	0.0222229	BLCA
GO:0001932	BP	regulation of protein phosphorylation	1068	138	0.0222786	BLCA
GO:0098876	BP	vesicle-mediated transport to the plasma membrane	146	25	0.0223785	BLCA
GO:0033292	BP	T-tubule organization	9	4	0.0224422	BLCA
GO:0061912	BP	selective autophagy	82	15	0.0224601	BLCA
GO:0035162	BP	embryonic hemopoiesis	24	7	0.0225367	BLCA
GO:1990531	CC	phospholipid-translocating ATPase complex	14	5	0.0225401	BLCA
GO:0090556	MF	phosphatidylserine floppase activity	9	4	0.0226082	BLCA
GO:0042692	BP	muscle cell differentiation	405	63	0.0226174	BLCA
GO:0046474	BP	glycerophospholipid biosynthetic process	208	33	0.0227388	BLCA
GO:0071677	BP	positive regulation of mononuclear cell migration	69	12	0.0228693	BLCA
GO:0043547	BP	positive regulation of GTPase activity	260	43	0.0230019	BLCA
GO:1990728	CC	mitotic spindle assembly checkpoint MAD1-MAD2 complex	2	2	0.023031	BLCA
GO:0004674	MF	protein serine/threonine kinase activity	420	65	0.0231432	BLCA
GO:0010820	BP	positive regulation of T cell chemotaxis	14	4	0.0232268	BLCA
GO:0010811	BP	positive regulation of cell-substrate adhesion	125	23	0.0232921	BLCA
GO:2000406	BP	positive regulation of T cell migration	32	7	0.0234001	BLCA
GO:0038132	MF	neuregulin binding	5	3	0.0235951	BLCA
GO:0045794	BP	negative regulation of cell volume	5	3	0.024127	BLCA
GO:0045859	BP	regulation of protein kinase activity	643	89	0.0242432	BLCA
GO:0007205	BP	protein kinase C-activating G protein-coupled receptor signaling pathway	26	7	0.0245432	BLCA
GO:0034774	CC	secretory granule lumen	310	39	0.0245703	BLCA
GO:0001952	BP	regulation of cell-matrix adhesion	125	24	0.0245747	BLCA
GO:0071612	BP	IP-10 production	5	2	0.0249807	BLCA
GO:0071658	BP	regulation of IP-10 production	5	2	0.0249807	BLCA
GO:0060495	BP	cell-cell signaling involved in lung development	2	2	0.0249951	BLCA
GO:0046069	BP	cGMP catabolic process	4	3	0.0250271	BLCA
GO:0007493	BP	endodermal cell fate determination	2	2	0.0250774	BLCA
GO:0032925	BP	regulation of activin receptor signaling pathway	25	7	0.0251707	BLCA
GO:0043085	BP	positive regulation of catalytic activity	1133	146	0.0252056	BLCA
GO:0042169	MF	SH2 domain binding	41	10	0.0253429	BLCA
GO:2000403	BP	positive regulation of lymphocyte migration	39	8	0.0253468	BLCA
GO:0048646	BP	anatomical structure formation involved in morphogenesis	1222	166	0.0255949	BLCA
GO:0035934	BP	corticosterone secretion	5	3	0.0256752	BLCA
GO:0042575	CC	DNA polymerase complex	19	5	0.0258368	BLCA
GO:0010819	BP	regulation of T cell chemotaxis	15	4	0.0258417	BLCA
GO:0042325	BP	regulation of phosphorylation	1207	156	0.0259162	BLCA
GO:0033673	BP	negative regulation of kinase activity	232	37	0.0259438	BLCA
GO:0016514	CC	SWI/SNF complex	30	8	0.0259889	BLCA
GO:0044351	BP	macropinocytosis	10	4	0.0259996	BLCA
GO:0097750	BP	endosome membrane tubulation	2	2	0.0260864	BLCA
GO:0032559	MF	adenyl ribonucleotide binding	1500	191	0.0261006	BLCA
GO:0031032	BP	actomyosin structure organization	202	35	0.0261172	BLCA
GO:0007160	BP	cell-matrix adhesion	236	40	0.0263409	BLCA
GO:0071310	BP	cellular response to organic substance	2369	281	0.0264297	BLCA
GO:0016429	MF	tRNA (adenine-N1-)-methyltransferase activity	3	2	0.0266681	BLCA
GO:0061953	MF	mRNA (adenine-N1-)-methyltransferase activity	3	2	0.0266681	BLCA
GO:0005996	BP	monosaccharide metabolic process	244	37	0.0267795	BLCA
GO:0002446	BP	neutrophil mediated immunity	34	7	0.0269134	BLCA
GO:0031597	CC	cytosolic proteasome complex	5	2	0.0269948	BLCA
GO:0001675	BP	acrosome assembly	23	5	0.0270046	BLCA
GO:0060205	CC	cytoplasmic vesicle lumen	313	39	0.0271033	BLCA
GO:0015631	MF	tubulin binding	369	53	0.0271953	BLCA
GO:0005607	CC	laminin-2 complex	2	2	0.0272788	BLCA
GO:0034446	BP	substrate adhesion-dependent cell spreading	109	21	0.0274123	BLCA
GO:1900024	BP	regulation of substrate adhesion-dependent cell spreading	59	13	0.0274585	BLCA
GO:0003726	MF	double-stranded RNA adenosine deaminase activity	6	3	0.0276921	BLCA
GO:0007229	BP	integrin-mediated signaling pathway	113	21	0.0277005	BLCA
GO:0007059	BP	chromosome segregation	370	46	0.0278938	BLCA
GO:0043549	BP	regulation of kinase activity	751	104	0.028039	BLCA
GO:0031223	BP	auditory behavior	12	5	0.0280805	BLCA
GO:0031324	BP	negative regulation of cellular metabolic process	2239	274	0.0281138	BLCA
GO:0016570	BP	histone modification	466	65	0.0281313	BLCA
GO:0051640	BP	organelle localization	558	76	0.02819	BLCA
GO:0019211	MF	phosphatase activator activity	23	6	0.0282381	BLCA
GO:0071402	BP	cellular response to lipoprotein particle stimulus	36	8	0.0283312	BLCA
GO:0001702	BP	gastrulation with mouth forming second	28	8	0.0285738	BLCA
GO:0097116	BP	gephyrin clustering involved in postsynaptic density assembly	5	3	0.028801	BLCA
GO:0071295	BP	cellular response to vitamin	30	7	0.0288494	BLCA
GO:0006796	BP	phosphate-containing compound metabolic process	2692	317	0.0289769	BLCA
GO:0035065	BP	regulation of histone acetylation	65	13	0.0291171	BLCA
GO:0014832	BP	urinary bladder smooth muscle contraction	8	4	0.029121	BLCA
GO:0000808	CC	origin recognition complex	9	3	0.0291444	BLCA
GO:0005664	CC	nuclear origin of replication recognition complex	9	3	0.0291444	BLCA
GO:0071383	BP	cellular response to steroid hormone stimulus	202	32	0.0291862	BLCA
GO:0030695	MF	GTPase regulator activity	456	70	0.0291948	BLCA
GO:0060589	MF	nucleoside-triphosphatase regulator activity	456	70	0.0291948	BLCA
GO:0042328	MF	heparan sulfate N-acetylglucosaminyltransferase activity	2	2	0.0293277	BLCA
GO:0050509	MF	N-acetylglucosaminyl-proteoglycan 4-beta-glucuronosyltransferase activity	2	2	0.0293277	BLCA
GO:0034333	BP	adherens junction assembly	13	5	0.0293748	BLCA
GO:0001568	BP	blood vessel development	766	104	0.0294286	BLCA
GO:0060142	BP	regulation of syncytium formation by plasma membrane fusion	30	7	0.0294651	BLCA
GO:0016482	BP	cytosolic transport	164	26	0.0295645	BLCA
GO:0043596	CC	nuclear replication fork	33	7	0.0296114	BLCA
GO:0071840	BP	cellular component organization or biogenesis	6279	700	0.0297316	BLCA
GO:0043434	BP	response to peptide hormone	409	58	0.0297404	BLCA
GO:1903391	BP	regulation of adherens junction organization	5	3	0.0298418	BLCA
GO:0061740	BP	protein targeting to lysosome involved in chaperone-mediated autophagy	3	2	0.0299448	BLCA
GO:0043570	BP	maintenance of DNA repeat elements	6	3	0.0299564	BLCA
GO:0000118	CC	histone deacetylase complex	80	16	0.0300166	BLCA
GO:0005639	CC	integral component of nuclear inner membrane	18	5	0.0300522	BLCA
GO:0031229	CC	intrinsic component of nuclear inner membrane	18	5	0.0300522	BLCA
GO:0051146	BP	striated muscle cell differentiation	291	47	0.030174	BLCA
GO:0010862	BP	positive regulation of pathway-restricted SMAD protein phosphorylation	48	10	0.0302925	BLCA
GO:0016043	BP	cellular component organization	6077	684	0.0303203	BLCA
GO:0007015	BP	actin filament organization	442	68	0.0305345	BLCA
GO:0032231	BP	regulation of actin filament bundle assembly	107	21	0.0306323	BLCA
GO:0032701	BP	negative regulation of interleukin-18 production	5	2	0.0307384	BLCA
GO:0022604	BP	regulation of cell morphogenesis	307	50	0.0307822	BLCA
GO:1902945	MF	metalloendopeptidase activity involved in amyloid precursor protein catabolic process	3	2	0.0309176	BLCA
GO:0044028	BP	DNA hypomethylation	3	2	0.0310929	BLCA
GO:0044029	BP	hypomethylation of CpG island	3	2	0.0310929	BLCA
GO:0036131	MF	prostaglandin D2 11-ketoreductase activity	1	1	0.0311544	BLCA
GO:0045703	MF	ketoreductase activity	1	1	0.0311544	BLCA
GO:0007369	BP	gastrulation	192	34	0.0312445	BLCA
GO:1904019	BP	epithelial cell apoptotic process	135	22	0.0313939	BLCA
GO:0003278	BP	apoptotic process involved in heart morphogenesis	6	3	0.0314329	BLCA
GO:0051525	MF	NFAT protein binding	6	3	0.0315135	BLCA
GO:0022411	BP	cellular component disassembly	470	64	0.0315487	BLCA
GO:0070953	BP	regulation of neutrophil mediated killing of fungus	1	1	0.0315519	BLCA
GO:0070965	BP	positive regulation of neutrophil mediated killing of fungus	1	1	0.0315519	BLCA
GO:0090522	BP	vesicle tethering involved in exocytosis	9	4	0.0316474	BLCA
GO:0007009	BP	plasma membrane organization	163	26	0.0316783	BLCA
GO:0032587	CC	ruffle membrane	97	19	0.0318355	BLCA
GO:0006468	BP	protein phosphorylation	1514	192	0.0319076	BLCA
GO:0031523	CC	Myb complex	3	2	0.0319554	BLCA
GO:0032456	BP	endocytic recycling	83	16	0.032089	BLCA
GO:1904037	BP	positive regulation of epithelial cell apoptotic process	42	8	0.0321977	BLCA
GO:0016581	CC	NuRD complex	15	5	0.0323202	BLCA
GO:0090545	CC	CHD-type complex	15	5	0.0323202	BLCA
GO:0001726	CC	ruffle	178	31	0.0324185	BLCA
GO:0097242	BP	amyloid-beta clearance	39	9	0.0324239	BLCA
GO:0003281	BP	ventricular septum development	74	17	0.0324877	BLCA
GO:0006793	BP	phosphorus metabolic process	2718	319	0.0325381	BLCA
GO:0097070	BP	ductus arteriosus closure	5	3	0.0325524	BLCA
GO:0019216	BP	regulation of lipid metabolic process	340	49	0.0325558	BLCA
GO:0060947	BP	cardiac vascular smooth muscle cell differentiation	10	4	0.0325925	BLCA
GO:1903393	BP	positive regulation of adherens junction organization	2	2	0.0326398	BLCA
GO:0098634	MF	cell-matrix adhesion mediator activity	7	3	0.0327996	BLCA
GO:0048514	BP	blood vessel morphogenesis	686	93	0.0328015	BLCA
GO:0033036	BP	macromolecule localization	2872	328	0.0328955	BLCA
GO:0031983	CC	vesicle lumen	315	39	0.0329241	BLCA
GO:0034668	CC	integrin alpha4-beta1 complex	3	2	0.0329537	BLCA
GO:0008017	MF	microtubule binding	268	40	0.0330793	BLCA
GO:0045023	BP	G0 to G1 transition	40	8	0.0331035	BLCA
GO:1901680	MF	sulfur-containing amino acid secondary active transmembrane transporter activity	3	2	0.0332076	BLCA
GO:0030913	BP	paranodal junction assembly	6	3	0.0333926	BLCA
GO:0061713	BP	anterior neural tube closure	3	2	0.0334147	BLCA
GO:0050848	BP	regulation of calcium-mediated signaling	81	15	0.0334381	BLCA
GO:0046785	BP	microtubule polymerization	84	16	0.0334683	BLCA
GO:1901653	BP	cellular response to peptide	360	53	0.0336415	BLCA
GO:0004672	MF	protein kinase activity	555	83	0.0338466	BLCA
GO:0034988	MF	Fc-gamma receptor I complex binding	2	2	0.0339698	BLCA
GO:0098813	BP	nuclear chromosome segregation	310	39	0.0341715	BLCA
GO:0055001	BP	muscle cell development	191	32	0.0342588	BLCA
GO:0150007	BP	clathrin-dependent synaptic vesicle endocytosis	3	2	0.034308	BLCA
GO:0007030	BP	Golgi organization	146	23	0.034331	BLCA
GO:0044770	BP	cell cycle phase transition	569	73	0.0343991	BLCA
GO:0016773	MF	phosphotransferase activity, alcohol group as acceptor	660	96	0.0344333	BLCA
GO:0090269	BP	fibroblast growth factor production	9	3	0.0345528	BLCA
GO:0090270	BP	regulation of fibroblast growth factor production	9	3	0.0345528	BLCA
GO:0001944	BP	vasculature development	800	107	0.0345761	BLCA
GO:0004502	MF	kynurenine 3-monooxygenase activity	1	1	0.0346389	BLCA
GO:0036331	BP	avascular cornea development in camera-type eye	1	1	0.0348646	BLCA
GO:1901346	BP	negative regulation of vasculature development involved in avascular cornea development in camera-type eye	1	1	0.0348646	BLCA
GO:0008285	BP	negative regulation of cell population proliferation	764	99	0.0349159	BLCA
GO:1903689	BP	regulation of wound healing, spreading of epidermal cells	9	4	0.0349175	BLCA
GO:0051304	BP	chromosome separation	133	20	0.0349814	BLCA
GO:0051668	BP	localization within membrane	656	88	0.0350218	BLCA
GO:0033043	BP	regulation of organelle organization	1159	144	0.0350479	BLCA
GO:0051348	BP	negative regulation of transferase activity	267	40	0.0352245	BLCA
GO:0031974	CC	membrane-enclosed lumen	5758	592	0.0352702	BLCA
GO:0043233	CC	organelle lumen	5758	592	0.0352702	BLCA
GO:0070013	CC	intracellular organelle lumen	5758	592	0.0352702	BLCA
GO:0015630	CC	microtubule cytoskeleton	1334	158	0.0352708	BLCA
GO:0017101	CC	aminoacyl-tRNA synthetase multienzyme complex	10	3	0.0353473	BLCA
GO:0032237	BP	activation of store-operated calcium channel activity	5	3	0.0353798	BLCA
GO:0032273	BP	positive regulation of protein polymerization	91	17	0.0354398	BLCA
GO:0010506	BP	regulation of autophagy	339	47	0.0355219	BLCA
GO:0050790	BP	regulation of catalytic activity	2270	270	0.035589	BLCA
GO:0060976	BP	coronary vasculature development	47	11	0.0356812	BLCA
GO:0009967	BP	positive regulation of signal transduction	1524	189	0.035717	BLCA
GO:2001288	BP	positive regulation of caveolin-mediated endocytosis	3	2	0.0359205	BLCA
GO:0045332	BP	phospholipid translocation	52	11	0.0359392	BLCA
GO:0003186	BP	tricuspid valve morphogenesis	5	3	0.0360544	BLCA
GO:0019956	MF	chemokine binding	32	6	0.0360945	BLCA
GO:0110058	BP	positive regulation of blood vessel endothelial cell differentiation	1	1	0.0361282	BLCA
GO:0072396	BP	response to cell cycle checkpoint signaling	8	3	0.0363087	BLCA
GO:0072402	BP	response to DNA integrity checkpoint signaling	8	3	0.0363087	BLCA
GO:0072423	BP	response to DNA damage checkpoint signaling	8	3	0.0363087	BLCA
GO:0097104	BP	postsynaptic membrane assembly	9	4	0.0363772	BLCA
GO:0001163	MF	RNA polymerase I transcription regulatory region sequence-specific DNA binding	7	3	0.0363975	BLCA
GO:0001164	MF	RNA polymerase I core promoter sequence-specific DNA binding	7	3	0.0363975	BLCA
GO:0005547	MF	phosphatidylinositol-3,4,5-trisphosphate binding	38	9	0.0364104	BLCA
GO:0071386	BP	cellular response to corticosterone stimulus	3	2	0.0365123	BLCA
GO:0075509	BP	endocytosis involved in viral entry into host cell	12	4	0.0365681	BLCA
GO:0070577	MF	lysine-acetylated histone binding	23	6	0.0365884	BLCA
GO:0140033	MF	acetylation-dependent protein binding	23	6	0.0365884	BLCA
GO:0006890	BP	retrograde vesicle-mediated transport, Golgi to endoplasmic reticulum	51	10	0.0367286	BLCA
GO:0018230	BP	peptidyl-L-cysteine S-palmitoylation	23	5	0.036754	BLCA
GO:0018231	BP	peptidyl-S-diacylglycerol-L-cysteine biosynthetic process from peptidyl-cysteine	23	5	0.036754	BLCA
GO:0007020	BP	microtubule nucleation	38	9	0.0367868	BLCA
GO:0003692	MF	left-handed Z-DNA binding	1	1	0.036879	BLCA
GO:0034502	BP	protein localization to chromosome	112	16	0.0369595	BLCA
GO:0031248	CC	protein acetyltransferase complex	100	16	0.0369985	BLCA
GO:1902493	CC	acetyltransferase complex	100	16	0.0369985	BLCA
GO:0031616	CC	spindle pole centrosome	14	4	0.0371347	BLCA
GO:1903055	BP	positive regulation of extracellular matrix organization	27	8	0.0371716	BLCA
GO:0016426	MF	tRNA (adenine) methyltransferase activity	4	2	0.0371743	BLCA
GO:0072357	CC	PTW/PP1 phosphatase complex	7	3	0.0372208	BLCA
GO:0030331	MF	nuclear estrogen receptor binding	39	8	0.0373371	BLCA
GO:0140333	MF	glycerophospholipid flippase activity	14	5	0.0375452	BLCA
GO:0010958	BP	regulation of amino acid import across plasma membrane	18	5	0.0377452	BLCA
GO:1903789	BP	regulation of amino acid transmembrane transport	18	5	0.0377452	BLCA
GO:0033142	MF	nuclear progesterone receptor binding	2	2	0.0378722	BLCA
GO:0035702	BP	monocyte homeostasis	3	2	0.037905	BLCA
GO:1902808	BP	positive regulation of cell cycle G1/S phase transition	66	12	0.0379137	BLCA
GO:0070098	BP	chemokine-mediated signaling pathway	84	11	0.0379157	BLCA
GO:2000756	BP	regulation of peptidyl-lysine acetylation	74	14	0.0381745	BLCA
GO:0045944	BP	positive regulation of transcription by RNA polymerase II	1213	165	0.0382001	BLCA
GO:0032878	BP	regulation of establishment or maintenance of cell polarity	28	7	0.0383584	BLCA
GO:0005246	MF	calcium channel regulator activity	44	10	0.0384889	BLCA
GO:0046726	BP	positive regulation by virus of viral protein levels in host cell	4	2	0.0387648	BLCA
GO:0048332	BP	mesoderm morphogenesis	74	16	0.0387822	BLCA
GO:0033674	BP	positive regulation of kinase activity	471	68	0.0387859	BLCA
GO:0043456	BP	regulation of pentose-phosphate shunt	6	3	0.0390523	BLCA
GO:0051338	BP	regulation of transferase activity	873	115	0.039183	BLCA
GO:0048738	BP	cardiac muscle tissue development	239	39	0.0392084	BLCA
GO:0019220	BP	regulation of phosphate metabolic process	1360	170	0.0393366	BLCA
GO:0036122	MF	BMP binding	20	5	0.0394413	BLCA
GO:0060612	BP	adipose tissue development	52	11	0.0396621	BLCA
GO:0035728	BP	response to hepatocyte growth factor	19	5	0.0398971	BLCA
GO:0006469	BP	negative regulation of protein kinase activity	212	33	0.0400028	BLCA
GO:0060143	BP	positive regulation of syncytium formation by plasma membrane fusion	24	6	0.0400823	BLCA
GO:0034354	BP	'de novo' NAD biosynthetic process from tryptophan	7	2	0.0401003	BLCA
GO:0032754	BP	positive regulation of interleukin-5 production	10	4	0.04011	BLCA
GO:1990683	BP	DNA double-strand break attachment to nuclear envelope	2	2	0.0402018	BLCA
GO:0050930	BP	induction of positive chemotaxis	13	4	0.0402712	BLCA
GO:0034596	MF	phosphatidylinositol phosphate 4-phosphatase activity	10	4	0.0403489	BLCA
GO:0006650	BP	glycerophospholipid metabolic process	304	42	0.0404824	BLCA
GO:0034058	BP	endosomal vesicle fusion	12	4	0.0404899	BLCA
GO:0051495	BP	positive regulation of cytoskeleton organization	194	31	0.0407916	BLCA
GO:0036211	BP	protein modification process	3480	397	0.0408344	BLCA
GO:0070411	MF	I-SMAD binding	14	5	0.0408404	BLCA
GO:0031997	MF	N-terminal myristoylation domain binding	3	2	0.0410139	BLCA
GO:0045601	BP	regulation of endothelial cell differentiation	47	9	0.0411728	BLCA
GO:0051174	BP	regulation of phosphorus metabolic process	1361	170	0.0411759	BLCA
GO:0065009	BP	regulation of molecular function	2988	349	0.0412481	BLCA
GO:1990401	BP	embryonic lung development	2	2	0.0413682	BLCA
GO:0051172	BP	negative regulation of nitrogen compound metabolic process	2374	281	0.0414813	BLCA
GO:0048844	BP	artery morphogenesis	79	16	0.0416107	BLCA
GO:0060700	BP	regulation of ribonuclease activity	9	3	0.0418968	BLCA
GO:0016197	BP	endosomal transport	236	34	0.0419465	BLCA
GO:1901623	BP	regulation of lymphocyte chemotaxis	24	5	0.0420416	BLCA
GO:0010665	BP	regulation of cardiac muscle cell apoptotic process	50	10	0.0421075	BLCA
GO:0051983	BP	regulation of chromosome segregation	130	19	0.0422482	BLCA
GO:0071772	BP	response to BMP	174	30	0.04248	BLCA
GO:0071773	BP	cellular response to BMP stimulus	174	30	0.04248	BLCA
GO:0000779	CC	condensed chromosome, centromeric region	170	23	0.0426582	BLCA
GO:0098687	CC	chromosomal region	380	45	0.0428231	BLCA
GO:0055094	BP	response to lipoprotein particle	33	7	0.042953	BLCA
GO:0090110	BP	COPII-coated vesicle cargo loading	15	4	0.0429639	BLCA
GO:0009237	BP	siderophore metabolic process	1	1	0.0430791	BLCA
GO:0019290	BP	siderophore biosynthetic process	1	1	0.0430791	BLCA
GO:0001780	BP	neutrophil homeostasis	20	5	0.0430816	BLCA
GO:0110020	BP	regulation of actomyosin structure organization	103	19	0.0433612	BLCA
GO:0000932	CC	P-body	95	16	0.0433708	BLCA
GO:1903147	BP	negative regulation of autophagy of mitochondrion	7	3	0.0434277	BLCA
GO:0010968	BP	regulation of microtubule nucleation	11	4	0.0434698	BLCA
GO:0071393	BP	cellular response to progesterone stimulus	5	3	0.0435126	BLCA
GO:0032915	BP	positive regulation of transforming growth factor beta2 production	3	2	0.0435155	BLCA
GO:0038062	MF	protein tyrosine kinase collagen receptor activity	3	2	0.0436259	BLCA
GO:1902850	BP	microtubule cytoskeleton organization involved in mitosis	162	23	0.0436376	BLCA
GO:0006907	BP	pinocytosis	22	6	0.043664	BLCA
GO:0007097	BP	nuclear migration	24	7	0.0436795	BLCA
GO:1902856	BP	negative regulation of non-motile cilium assembly	3	2	0.0437278	BLCA
GO:0051128	BP	regulation of cellular component organization	2320	289	0.043767	BLCA
GO:2000742	BP	regulation of anterior head development	2	2	0.0437803	BLCA
GO:2000744	BP	positive regulation of anterior head development	2	2	0.0437803	BLCA
GO:0009615	BP	response to virus	384	46	0.04383	BLCA
GO:0002113	MF	interleukin-33 binding	1	1	0.0438521	BLCA
GO:0008465	MF	glycerate dehydrogenase activity	1	1	0.0439021	BLCA
GO:0016618	MF	hydroxypyruvate reductase activity	1	1	0.0439021	BLCA
GO:0030267	MF	glyoxylate reductase (NADP+) activity	1	1	0.0439021	BLCA
GO:0106345	MF	glyoxylate reductase activity	1	1	0.0439021	BLCA
GO:0085029	BP	extracellular matrix assembly	45	11	0.0440076	BLCA
GO:0140285	BP	endosome fission	3	2	0.044022	BLCA
GO:2000351	BP	regulation of endothelial cell apoptotic process	59	10	0.0442966	BLCA
GO:0006661	BP	phosphatidylinositol biosynthetic process	131	21	0.0444043	BLCA
GO:1903959	BP	regulation of anion transmembrane transport	27	6	0.0444557	BLCA
GO:0071675	BP	regulation of mononuclear cell migration	116	17	0.0445543	BLCA
GO:0032783	CC	super elongation complex	7	3	0.0446381	BLCA
GO:0001188	BP	RNA polymerase I preinitiation complex assembly	8	3	0.0446774	BLCA
GO:0072577	BP	endothelial cell apoptotic process	65	11	0.0451003	BLCA
GO:0051383	BP	kinetochore organization	22	5	0.0451579	BLCA
GO:0010453	BP	regulation of cell fate commitment	42	9	0.0454243	BLCA
GO:0043086	BP	negative regulation of catalytic activity	762	90	0.0455614	BLCA
GO:0003363	BP	lamellipodium assembly involved in ameboidal cell migration	1	1	0.045662	BLCA
GO:0021816	BP	extension of a leading process involved in cell motility in cerebral cortex radial glia guided migration	1	1	0.045662	BLCA
GO:0060161	BP	positive regulation of dopamine receptor signaling pathway	5	2	0.0457815	BLCA
GO:0033273	BP	response to vitamin	84	15	0.0458255	BLCA
GO:0030018	CC	Z disc	127	23	0.045884	BLCA
GO:0097202	BP	activation of cysteine-type endopeptidase activity	19	5	0.0461711	BLCA
GO:0000822	MF	inositol hexakisphosphate binding	3	2	0.0463371	BLCA
GO:2000288	BP	positive regulation of myoblast proliferation	14	4	0.0463474	BLCA
GO:0016403	MF	dimethylargininase activity	2	2	0.0463759	BLCA
GO:1905868	BP	regulation of 3'-UTR-mediated mRNA stabilization	6	3	0.046387	BLCA
GO:0003231	BP	cardiac ventricle development	126	24	0.0467462	BLCA
GO:0031112	BP	positive regulation of microtubule polymerization or depolymerization	36	8	0.0468596	BLCA
GO:1901655	BP	cellular response to ketone	98	18	0.0469229	BLCA
GO:0060537	BP	muscle tissue development	417	63	0.0469231	BLCA
GO:1901341	BP	positive regulation of store-operated calcium channel activity	6	3	0.0469472	BLCA
GO:0005522	MF	profilin binding	10	4	0.0470804	BLCA
GO:0051959	MF	dynein light intermediate chain binding	24	7	0.0473614	BLCA
GO:0001705	BP	ectoderm formation	3	2	0.0474334	BLCA
GO:0000992	MF	RNA polymerase III cis-regulatory region sequence-specific DNA binding	7	3	0.0475359	BLCA
GO:0001006	MF	RNA polymerase III type 3 promoter sequence-specific DNA binding	7	3	0.0475359	BLCA
GO:0031670	BP	cellular response to nutrient	41	8	0.0475421	BLCA
GO:0009968	BP	negative regulation of signal transduction	1275	160	0.0475593	BLCA
GO:0000086	BP	G2/M transition of mitotic cell cycle	141	22	0.047585	BLCA
GO:0098594	CC	mucin granule	1	1	0.047814	BLCA
GO:1901163	BP	regulation of trophoblast cell migration	15	4	0.0478484	BLCA
GO:1903944	BP	negative regulation of hepatocyte apoptotic process	6	3	0.0479949	BLCA
GO:0031669	BP	cellular response to nutrient levels	225	32	0.0481232	BLCA
GO:2000489	BP	regulation of hepatic stellate cell activation	7	3	0.048449	BLCA
GO:1902904	BP	negative regulation of supramolecular fiber organization	162	27	0.0485655	BLCA
GO:0072359	BP	circulatory system development	1185	156	0.0488226	BLCA
GO:0007638	BP	mechanosensory behavior	14	5	0.0488292	BLCA
GO:0070265	BP	necrotic cell death	70	11	0.0488552	BLCA
GO:0051149	BP	positive regulation of muscle cell differentiation	82	14	0.0490095	BLCA
GO:0007155	BP	cell adhesion	1498	190	0.0491554	BLCA
GO:0002572	BP	pro-T cell differentiation	3	2	0.0493827	BLCA
GO:0036367	BP	light adaption	4	2	0.0494822	BLCA
GO:1902824	BP	positive regulation of late endosome to lysosome transport	1	1	0.0496562	BLCA
GO:1903337	BP	positive regulation of vacuolar transport	1	1	0.0496562	BLCA
GO:0140031	MF	phosphorylation-dependent protein binding	6	3	0.0496711	BLCA
GO:0070899	BP	mitochondrial tRNA wobble uridine modification	1	1	0.0497395	BLCA
GO:0009360	CC	DNA polymerase III complex	1	1	0.0498261	BLCA
GO:0051835	BP	positive regulation of synapse structural plasticity	3	2	0.0498719	BLCA

## Sheet: HNSC
ID	ONTOLOGY	TERM	N	DE	P.DE	Cancer
GO:0030032	BP	lamellipodium assembly	73	17	0.000360568	HNSC
GO:0043666	BP	regulation of phosphoprotein phosphatase activity	57	13	0.000438132	HNSC
GO:0097581	BP	lamellipodium organization	92	19	0.000844198	HNSC
GO:1900744	BP	regulation of p38MAPK cascade	44	11	0.00123007	HNSC
GO:0120031	BP	plasma membrane bounded cell projection assembly	553	65	0.00133139	HNSC
GO:0032515	BP	negative regulation of phosphoprotein phosphatase activity	25	7	0.00143295	HNSC
GO:0000910	BP	cytokinesis	181	26	0.0015541	HNSC
GO:0098732	BP	macromolecule deacylation	136	22	0.00173303	HNSC
GO:0045744	BP	negative regulation of G protein-coupled receptor signaling pathway	51	11	0.00191306	HNSC
GO:0000182	MF	rDNA binding	10	5	0.00199497	HNSC
GO:0016575	BP	histone deacetylation	101	18	0.0020915	HNSC
GO:0030031	BP	cell projection assembly	564	65	0.00213304	HNSC
GO:0035308	BP	negative regulation of protein dephosphorylation	33	8	0.00215405	HNSC
GO:0010591	BP	regulation of lamellipodium assembly	42	10	0.00233861	HNSC
GO:0004740	MF	pyruvate dehydrogenase (acetyl-transferring) kinase activity	5	3	0.00236745	HNSC
GO:0021814	BP	cell motility involved in cerebral cortex radial glia guided migration	6	4	0.00236884	HNSC
GO:0035303	BP	regulation of dephosphorylation	130	20	0.00237242	HNSC
GO:0051018	MF	protein kinase A binding	49	11	0.00247235	HNSC
GO:0060183	BP	apelin receptor signaling pathway	2	2	0.00257961	HNSC
GO:0120032	BP	regulation of plasma membrane bounded cell projection assembly	194	29	0.00261846	HNSC
GO:0061015	BP	snRNA import into nucleus	2	2	0.00270358	HNSC
GO:0061029	BP	eyelid development in camera-type eye	13	6	0.00277504	HNSC
GO:0035304	BP	regulation of protein dephosphorylation	92	16	0.00280813	HNSC
GO:0038066	BP	p38MAPK cascade	56	12	0.00281432	HNSC
GO:1902743	BP	regulation of lamellipodium organization	54	12	0.00284969	HNSC
GO:0001221	MF	transcription coregulator binding	108	22	0.00290174	HNSC
GO:0060491	BP	regulation of cell projection assembly	196	29	0.00310787	HNSC
GO:0010921	BP	regulation of phosphatase activity	81	14	0.00312092	HNSC
GO:0009649	BP	entrainment of circadian clock	34	9	0.00314649	HNSC
GO:0002457	BP	T cell antigen processing and presentation	5	3	0.0036033	HNSC
GO:0034477	BP	U6 snRNA 3'-end processing	2	2	0.00364263	HNSC
GO:0005546	MF	phosphatidylinositol-4,5-bisphosphate binding	81	15	0.00388528	HNSC
GO:0036496	BP	regulation of translational initiation by eIF2 alpha dephosphorylation	2	2	0.00417768	HNSC
GO:0035331	BP	negative regulation of hippo signaling	13	6	0.00441295	HNSC
GO:0035305	BP	negative regulation of dephosphorylation	46	9	0.0044604	HNSC
GO:0071872	BP	cellular response to epinephrine stimulus	11	5	0.00446592	HNSC
GO:0035748	CC	myelin sheath abaxonal region	6	4	0.00461324	HNSC
GO:0097512	CC	cardiac myofibril	6	3	0.00479093	HNSC
GO:0043153	BP	entrainment of circadian clock by photoperiod	29	8	0.00501065	HNSC
GO:0035601	BP	protein deacylation	132	20	0.00523942	HNSC
GO:0006090	BP	pyruvate metabolic process	107	17	0.00526106	HNSC
GO:1905643	BP	positive regulation of DNA methylation	4	3	0.00537952	HNSC
GO:0043470	BP	regulation of carbohydrate catabolic process	56	11	0.00574676	HNSC
GO:0007398	BP	ectoderm development	22	7	0.00575013	HNSC
GO:1902936	MF	phosphatidylinositol bisphosphate binding	105	18	0.00575903	HNSC
GO:0007296	BP	vitellogenesis	4	3	0.00579117	HNSC
GO:0006476	BP	protein deacetylation	121	19	0.00583077	HNSC
GO:0038133	BP	ERBB2-ERBB3 signaling pathway	4	3	0.00583827	HNSC
GO:0035329	BP	hippo signaling	43	11	0.00588532	HNSC
GO:0003994	MF	aconitate hydratase activity	3	2	0.00621299	HNSC
GO:0140192	BP	regulation of adenylate cyclase-activating adrenergic receptor signaling pathway involved in heart process	4	3	0.00639863	HNSC
GO:0140199	BP	negative regulation of adenylate cyclase-activating adrenergic receptor signaling pathway involved in heart process	4	3	0.00639863	HNSC
GO:1902850	BP	microtubule cytoskeleton organization involved in mitosis	162	21	0.00651288	HNSC
GO:0060211	BP	regulation of nuclear-transcribed mRNA poly(A) tail shortening	15	5	0.00673766	HNSC
GO:0019211	MF	phosphatase activator activity	23	6	0.00683151	HNSC
GO:0090148	BP	membrane fission	43	9	0.00690585	HNSC
GO:0007049	BP	cell cycle	1768	162	0.00694119	HNSC
GO:0050775	BP	positive regulation of dendrite morphogenesis	35	9	0.00709134	HNSC
GO:1905475	BP	regulation of protein localization to membrane	170	25	0.00727306	HNSC
GO:0031058	BP	positive regulation of histone modification	102	16	0.00752704	HNSC
GO:0008459	MF	chondroitin 6-sulfotransferase activity	2	2	0.00786128	HNSC
GO:0097729	CC	9+2 motile cilium	160	19	0.00791859	HNSC
GO:0046939	BP	nucleotide phosphorylation	101	16	0.00828374	HNSC
GO:1901565	BP	organonitrogen compound catabolic process	1322	121	0.0083481	HNSC
GO:0044262	BP	cellular carbohydrate metabolic process	289	35	0.00875365	HNSC
GO:0018210	BP	peptidyl-threonine modification	119	20	0.00897838	HNSC
GO:1905460	BP	negative regulation of vascular associated smooth muscle cell apoptotic process	7	3	0.00899617	HNSC
GO:0010614	BP	negative regulation of cardiac muscle hypertrophy	36	8	0.00913041	HNSC
GO:0009648	BP	photoperiodism	33	8	0.00916025	HNSC
GO:0010923	BP	negative regulation of phosphatase activity	35	7	0.0093678	HNSC
GO:0007052	BP	mitotic spindle organization	132	17	0.00964572	HNSC
GO:0046031	BP	ADP metabolic process	91	15	0.0097757	HNSC
GO:0010616	BP	negative regulation of cardiac muscle adaptation	9	4	0.00979034	HNSC
GO:1903243	BP	negative regulation of cardiac muscle hypertrophy in response to stress	9	4	0.00979034	HNSC
GO:0006096	BP	glycolytic process	82	14	0.0098303	HNSC
GO:0000070	BP	mitotic sister chromatid segregation	202	24	0.010027	HNSC
GO:0086023	BP	adenylate cyclase-activating adrenergic receptor signaling pathway involved in heart process	9	4	0.0100661	HNSC
GO:0031753	MF	endothelial differentiation G protein-coupled receptor binding	2	2	0.0101828	HNSC
GO:0031755	MF	Edg-2 lysophosphatidic acid receptor binding	2	2	0.0101828	HNSC
GO:0030163	BP	protein catabolic process	979	94	0.010351	HNSC
GO:0034665	CC	integrin alpha1-beta1 complex	2	2	0.0106485	HNSC
GO:0006757	BP	ATP generation from ADP	83	14	0.0106621	HNSC
GO:0097574	CC	lateral part of cell	5	3	0.0107284	HNSC
GO:0097575	CC	lateral cell cortex	2	2	0.0109567	HNSC
GO:0010485	MF	H4 histone acetyltransferase activity	13	4	0.0111037	HNSC
GO:0005930	CC	axoneme	154	19	0.0111406	HNSC
GO:0045064	BP	T-helper 2 cell differentiation	15	5	0.0114574	HNSC
GO:0036409	CC	histone H3-K14 acetyltransferase complex	2	2	0.0115447	HNSC
GO:0006021	BP	inositol biosynthetic process	3	2	0.0118524	HNSC
GO:0038129	BP	ERBB3 signaling pathway	5	3	0.0123767	HNSC
GO:0000301	BP	retrograde transport, vesicle recycling within Golgi	9	3	0.0126476	HNSC
GO:0140066	BP	peptidyl-lysine crotonylation	2	2	0.0127694	HNSC
GO:0006893	BP	Golgi to plasma membrane transport	59	10	0.0127746	HNSC
GO:0014741	BP	negative regulation of muscle hypertrophy	38	8	0.01287	HNSC
GO:1903047	BP	mitotic cell cycle process	782	78	0.0128789	HNSC
GO:0097014	CC	ciliary plasm	155	19	0.0130007	HNSC
GO:0022402	BP	cell cycle process	1230	115	0.0130471	HNSC
GO:0008118	MF	N-acetyllactosaminide alpha-2,3-sialyltransferase activity	2	2	0.0131223	HNSC
GO:0050000	BP	chromosome localization	88	13	0.013212	HNSC
GO:0010922	BP	positive regulation of phosphatase activity	35	7	0.0132351	HNSC
GO:0006404	BP	RNA import into nucleus	4	2	0.0133188	HNSC
GO:0034237	MF	protein kinase A regulatory subunit binding	25	6	0.0135502	HNSC
GO:0033962	BP	P-body assembly	20	5	0.0137354	HNSC
GO:1900745	BP	positive regulation of p38MAPK cascade	30	7	0.0137755	HNSC
GO:0120092	MF	crotonyl-CoA hydratase activity	2	2	0.0138094	HNSC
GO:0007051	BP	spindle organization	194	23	0.0138464	HNSC
GO:0008093	MF	cytoskeletal anchor activity	23	7	0.0143817	HNSC
GO:0005730	CC	nucleolus	1289	98	0.0147019	HNSC
GO:0019068	BP	virion assembly	35	7	0.0149331	HNSC
GO:0006165	BP	nucleoside diphosphate phosphorylation	99	15	0.0151826	HNSC
GO:0031365	BP	N-terminal protein amino acid modification	30	6	0.0153445	HNSC
GO:1902969	BP	mitotic DNA replication	14	4	0.0154701	HNSC
GO:0090129	BP	positive regulation of synapse maturation	9	4	0.0155435	HNSC
GO:0045628	BP	regulation of T-helper 2 cell differentiation	11	4	0.0156627	HNSC
GO:0007276	BP	gamete generation	710	65	0.0156861	HNSC
GO:0097009	BP	energy homeostasis	43	9	0.0157526	HNSC
GO:0140571	MF	transmembrane ascorbate ferrireductase activity	4	2	0.0158208	HNSC
GO:0032465	BP	regulation of cytokinesis	91	13	0.0158534	HNSC
GO:0038143	CC	ERBB3:ERBB2 complex	2	2	0.0161486	HNSC
GO:0002116	CC	semaphorin receptor complex	11	5	0.0162899	HNSC
GO:0018107	BP	peptidyl-threonine phosphorylation	110	18	0.0162952	HNSC
GO:0004652	MF	polynucleotide adenylyltransferase activity	14	4	0.0164838	HNSC
GO:0120036	BP	plasma membrane bounded cell projection organization	1484	159	0.0166039	HNSC
GO:0003252	BP	negative regulation of cell proliferation involved in heart valve morphogenesis	2	2	0.0166941	HNSC
GO:0019903	MF	protein phosphatase binding	148	21	0.0167056	HNSC
GO:0021915	BP	neural tube development	164	25	0.0167491	HNSC
GO:0019902	MF	phosphatase binding	194	26	0.016867	HNSC
GO:0051056	BP	regulation of small GTPase mediated signal transduction	294	40	0.0168871	HNSC
GO:0051603	BP	proteolysis involved in protein catabolic process	755	72	0.0169381	HNSC
GO:0043967	BP	histone H4 acetylation	74	12	0.0170099	HNSC
GO:0006110	BP	regulation of glycolytic process	47	9	0.017257	HNSC
GO:0071871	BP	response to epinephrine	14	5	0.0172707	HNSC
GO:0097240	BP	chromosome attachment to the nuclear envelope	6	3	0.017584	HNSC
GO:0033260	BP	nuclear DNA replication	38	7	0.0178112	HNSC
GO:1902855	BP	regulation of non-motile cilium assembly	12	4	0.0178118	HNSC
GO:0030695	MF	GTPase regulator activity	455	56	0.0178518	HNSC
GO:0060589	MF	nucleoside-triphosphatase regulator activity	455	56	0.0178518	HNSC
GO:0043471	BP	regulation of cellular carbohydrate catabolic process	13	4	0.0179281	HNSC
GO:0034392	BP	negative regulation of smooth muscle cell apoptotic process	15	4	0.0179713	HNSC
GO:0006413	BP	translational initiation	114	14	0.0182876	HNSC
GO:0031974	CC	membrane-enclosed lumen	5777	455	0.0183391	HNSC
GO:0043233	CC	organelle lumen	5777	455	0.0183391	HNSC
GO:0070013	CC	intracellular organelle lumen	5777	455	0.0183391	HNSC
GO:0010675	BP	regulation of cellular carbohydrate metabolic process	151	21	0.0184957	HNSC
GO:0030955	MF	potassium ion binding	12	4	0.0185194	HNSC
GO:0030062	CC	mitochondrial tricarboxylic acid cycle enzyme complex	11	3	0.0185642	HNSC
GO:0060236	BP	regulation of mitotic spindle organization	42	7	0.018833	HNSC
GO:0009826	BP	unidimensional cell growth	3	2	0.018906	HNSC
GO:0043001	BP	Golgi to plasma membrane protein transport	40	7	0.0189788	HNSC
GO:0032516	BP	positive regulation of phosphoprotein phosphatase activity	21	5	0.0190058	HNSC
GO:0031931	CC	TORC1 complex	6	3	0.0190748	HNSC
GO:0051293	BP	establishment of spindle localization	54	10	0.0192374	HNSC
GO:1904778	BP	positive regulation of protein localization to cell cortex	6	3	0.0192409	HNSC
GO:0090313	BP	regulation of protein targeting to membrane	33	7	0.0193128	HNSC
GO:0140576	BP	ascorbate homeostasis	3	2	0.0194177	HNSC
GO:1901981	MF	phosphatidylinositol phosphate binding	175	24	0.0195776	HNSC
GO:0051128	BP	regulation of cellular component organization	2322	225	0.0196371	HNSC
GO:1902949	BP	positive regulation of tau-protein kinase activity	8	3	0.0197169	HNSC
GO:0007386	BP	compartment pattern specification	5	3	0.0197601	HNSC
GO:0016570	BP	histone modification	466	51	0.0198306	HNSC
GO:0043555	BP	regulation of translation in response to stress	21	5	0.019897	HNSC
GO:0030496	CC	midbody	200	24	0.0199247	HNSC
GO:0031065	BP	positive regulation of histone deacetylation	23	6	0.0204299	HNSC
GO:0090169	BP	regulation of spindle assembly	32	6	0.0205119	HNSC
GO:0043502	BP	regulation of muscle adaptation	97	14	0.0207143	HNSC
GO:0019208	MF	phosphatase regulator activity	111	16	0.0208021	HNSC
GO:0006270	BP	DNA replication initiation	36	6	0.0208558	HNSC
GO:0060212	BP	negative regulation of nuclear-transcribed mRNA poly(A) tail shortening	3	2	0.0208945	HNSC
GO:0035091	MF	phosphatidylinositol binding	266	34	0.0208966	HNSC
GO:0072708	BP	response to sorbitol	7	3	0.0210121	HNSC
GO:0035330	BP	regulation of hippo signaling	24	7	0.0210496	HNSC
GO:0018023	BP	peptidyl-lysine trimethylation	56	9	0.0213674	HNSC
GO:0007010	BP	cytoskeleton organization	1468	146	0.0215198	HNSC
GO:0031074	CC	nucleocytoplasmic transport complex	11	3	0.0215482	HNSC
GO:0007089	BP	traversing start control point of mitotic cell cycle	4	2	0.0216186	HNSC
GO:0000244	BP	spliceosomal tri-snRNP complex assembly	17	4	0.0217547	HNSC
GO:0033363	BP	secretory granule organization	59	9	0.0220021	HNSC
GO:0010842	BP	retina layer formation	26	7	0.0222724	HNSC
GO:1903902	BP	positive regulation of viral life cycle	24	5	0.0223374	HNSC
GO:0001880	BP	Mullerian duct regression	4	2	0.0226286	HNSC
GO:0031749	MF	D2 dopamine receptor binding	3	2	0.0227015	HNSC
GO:0000226	BP	microtubule cytoskeleton organization	630	63	0.0227101	HNSC
GO:0035255	MF	ionotropic glutamate receptor binding	21	6	0.0227843	HNSC
GO:0071878	BP	negative regulation of adenylate cyclase-activating adrenergic receptor signaling pathway	6	3	0.0229275	HNSC
GO:0006109	BP	regulation of carbohydrate metabolic process	182	24	0.0230798	HNSC
GO:1990683	BP	DNA double-strand break attachment to nuclear envelope	2	2	0.0231109	HNSC
GO:1902856	BP	negative regulation of non-motile cilium assembly	3	2	0.0231192	HNSC
GO:0008156	BP	negative regulation of DNA replication	30	6	0.0231831	HNSC
GO:0045945	BP	positive regulation of transcription by RNA polymerase III	18	5	0.0232098	HNSC
GO:0017154	MF	semaphorin receptor activity	12	5	0.0232804	HNSC
GO:0106072	BP	negative regulation of adenylate cyclase-activating G protein-coupled receptor signaling pathway	12	4	0.0233444	HNSC
GO:0031063	BP	regulation of histone deacetylation	44	8	0.0234159	HNSC
GO:0001520	CC	outer dense fiber	6	2	0.0238699	HNSC
GO:0021627	BP	olfactory nerve morphogenesis	2	2	0.0239599	HNSC
GO:0021628	BP	olfactory nerve formation	2	2	0.0239599	HNSC
GO:0036211	BP	protein modification process	3487	304	0.0241915	HNSC
GO:0032153	CC	cell division site	70	12	0.0243205	HNSC
GO:0014807	BP	regulation of somitogenesis	6	3	0.0244764	HNSC
GO:0017119	CC	Golgi transport complex	11	3	0.0249588	HNSC
GO:0070925	BP	organelle assembly	914	83	0.0250711	HNSC
GO:0010510	BP	regulation of acetyl-CoA biosynthetic process from pyruvate	4	2	0.0252169	HNSC
GO:0051148	BP	negative regulation of muscle cell differentiation	68	11	0.0254304	HNSC
GO:0072203	BP	cell proliferation involved in metanephros development	10	4	0.0254481	HNSC
GO:0030030	BP	cell projection organization	1523	160	0.0255329	HNSC
GO:1903525	BP	regulation of membrane tubulation	6	3	0.0256734	HNSC
GO:0002181	BP	cytoplasmic translation	157	16	0.0263229	HNSC
GO:0031981	CC	nuclear lumen	4684	375	0.0263456	HNSC
GO:1904375	BP	regulation of protein localization to cell periphery	124	18	0.0265261	HNSC
GO:0014824	BP	artery smooth muscle contraction	10	3	0.0266144	HNSC
GO:2000742	BP	regulation of anterior head development	2	2	0.0267089	HNSC
GO:2000744	BP	positive regulation of anterior head development	2	2	0.0267089	HNSC
GO:0051653	BP	spindle localization	59	10	0.0268378	HNSC
GO:0042771	BP	intrinsic apoptotic signaling pathway in response to DNA damage by p53 class mediator	44	8	0.0269611	HNSC
GO:0036124	BP	histone H3-K9 trimethylation	17	4	0.0273651	HNSC
GO:1901722	BP	regulation of cell proliferation involved in kidney development	15	5	0.027935	HNSC
GO:0098880	BP	maintenance of postsynaptic specialization structure	6	3	0.0279867	HNSC
GO:0051726	BP	regulation of cell cycle	1104	101	0.0280429	HNSC
GO:0006020	BP	inositol metabolic process	10	3	0.0281356	HNSC
GO:0008157	MF	protein phosphatase 1 binding	30	6	0.0281474	HNSC
GO:0080182	BP	histone H3-K4 trimethylation	23	5	0.028421	HNSC
GO:0000278	BP	mitotic cell cycle	935	88	0.0284506	HNSC
GO:0021817	BP	nucleokinesis involved in cell motility in cerebral cortex radial glia guided migration	2	2	0.0286672	HNSC
GO:0072124	BP	regulation of glomerular mesangial cell proliferation	11	4	0.0287303	HNSC
GO:1903293	CC	phosphatase complex	57	9	0.0287358	HNSC
GO:0006470	BP	protein dephosphorylation	254	30	0.0288073	HNSC
GO:0003183	BP	mitral valve morphogenesis	10	4	0.0290676	HNSC
GO:0033503	CC	HULC complex	5	2	0.0291244	HNSC
GO:1905476	BP	negative regulation of protein localization to membrane	32	6	0.0294137	HNSC
GO:0003006	BP	developmental process involved in reproduction	901	84	0.0294626	HNSC
GO:0051303	BP	establishment of chromosome localization	81	11	0.029489	HNSC
GO:0043951	BP	negative regulation of cAMP-mediated signaling	12	4	0.029805	HNSC
GO:1902287	BP	semaphorin-plexin signaling pathway involved in axon guidance	14	5	0.0299385	HNSC
GO:0061383	BP	trabecula morphogenesis	47	9	0.0300264	HNSC
GO:0004832	MF	valine-tRNA ligase activity	2	2	0.0301623	HNSC
GO:0006438	BP	valyl-tRNA aminoacylation	2	2	0.0301623	HNSC
GO:0072542	MF	protein phosphatase activator activity	16	4	0.0301739	HNSC
GO:0072109	BP	glomerular mesangium development	17	5	0.0302534	HNSC
GO:0140575	MF	transmembrane monodehydroascorbate reductase activity	4	2	0.0302975	HNSC
GO:1901977	BP	negative regulation of cell cycle checkpoint	8	3	0.0305151	HNSC
GO:0044326	CC	dendritic spine neck	5	2	0.0305369	HNSC
GO:0006101	BP	citrate metabolic process	5	2	0.0306672	HNSC
GO:0003249	BP	cell proliferation involved in heart valve morphogenesis	3	2	0.0308388	HNSC
GO:0003250	BP	regulation of cell proliferation involved in heart valve morphogenesis	3	2	0.0308388	HNSC
GO:0090224	BP	regulation of spindle organization	46	7	0.0308761	HNSC
GO:1904140	BP	negative regulation of microglial cell migration	1	1	0.0309447	HNSC
GO:0003876	MF	AMP deaminase activity	3	2	0.0310618	HNSC
GO:0047623	MF	adenosine-phosphate deaminase activity	3	2	0.0310618	HNSC
GO:0014745	BP	negative regulation of muscle adaptation	12	4	0.0311748	HNSC
GO:0008080	MF	N-acetyltransferase activity	56	8	0.0312625	HNSC
GO:0009135	BP	purine nucleoside diphosphate metabolic process	103	15	0.0313979	HNSC
GO:0009179	BP	purine ribonucleoside diphosphate metabolic process	103	15	0.0313979	HNSC
GO:0044786	BP	cell cycle DNA replication	42	7	0.0315432	HNSC
GO:0006359	BP	regulation of transcription by RNA polymerase III	29	6	0.0319715	HNSC
GO:0043412	BP	macromolecule modification	3704	316	0.0320598	HNSC
GO:0043500	BP	muscle adaptation	122	16	0.0321999	HNSC
GO:0090219	BP	negative regulation of lipid kinase activity	7	3	0.032887	HNSC
GO:0034637	BP	cellular carbohydrate biosynthetic process	77	11	0.0330459	HNSC
GO:0005874	CC	microtubule	457	48	0.0330645	HNSC
GO:1903774	BP	positive regulation of viral budding via host ESCRT complex	3	2	0.0334614	HNSC
GO:0016049	BP	cell growth	486	57	0.0337673	HNSC
GO:0048814	BP	regulation of dendrite morphogenesis	65	12	0.0337685	HNSC
GO:0043632	BP	modification-dependent macromolecule catabolic process	672	63	0.0338528	HNSC
GO:0016051	BP	carbohydrate biosynthetic process	210	24	0.0339144	HNSC
GO:0006102	BP	isocitrate metabolic process	6	2	0.0340577	HNSC
GO:0070327	BP	thyroid hormone transport	10	3	0.0342765	HNSC
GO:0019888	MF	protein phosphatase regulator activity	93	13	0.0343026	HNSC
GO:0014020	BP	primary neural tube formation	98	16	0.0344328	HNSC
GO:1903614	BP	negative regulation of protein tyrosine phosphatase activity	3	2	0.0345365	HNSC
GO:0072111	BP	cell proliferation involved in kidney development	22	6	0.0347654	HNSC
GO:0021903	BP	rostrocaudal neural tube patterning	11	4	0.0348445	HNSC
GO:0038095	BP	Fc-epsilon receptor signaling pathway	24	5	0.0349802	HNSC
GO:0018011	BP	N-terminal peptidyl-alanine methylation	1	1	0.0349805	HNSC
GO:0018012	BP	N-terminal peptidyl-alanine trimethylation	1	1	0.0349805	HNSC
GO:0018013	BP	N-terminal peptidyl-glycine methylation	1	1	0.0349805	HNSC
GO:0018016	BP	N-terminal peptidyl-proline dimethylation	1	1	0.0349805	HNSC
GO:0018194	BP	peptidyl-alanine modification	1	1	0.0349805	HNSC
GO:0035568	BP	N-terminal peptidyl-proline methylation	1	1	0.0349805	HNSC
GO:0035570	BP	N-terminal peptidyl-serine methylation	1	1	0.0349805	HNSC
GO:0035572	BP	N-terminal peptidyl-serine dimethylation	1	1	0.0349805	HNSC
GO:0035573	BP	N-terminal peptidyl-serine trimethylation	1	1	0.0349805	HNSC
GO:0040001	BP	establishment of mitotic spindle localization	38	7	0.0349829	HNSC
GO:0019953	BP	sexual reproduction	840	72	0.034996	HNSC
GO:0048524	BP	positive regulation of viral process	64	9	0.0352875	HNSC
GO:0021535	BP	cell migration in hindbrain	16	5	0.0356622	HNSC
GO:0034236	MF	protein kinase A catalytic subunit binding	13	4	0.0360203	HNSC
GO:0008465	MF	glycerate dehydrogenase activity	1	1	0.0360324	HNSC
GO:0016618	MF	hydroxypyruvate reductase activity	1	1	0.0360324	HNSC
GO:0030267	MF	glyoxylate reductase (NADP+) activity	1	1	0.0360324	HNSC
GO:0106345	MF	glyoxylate reductase activity	1	1	0.0360324	HNSC
GO:0072350	BP	tricarboxylic acid metabolic process	14	3	0.0361114	HNSC
GO:0036118	BP	hyaluranon cable assembly	3	2	0.0365586	HNSC
GO:1900104	BP	regulation of hyaluranon cable assembly	3	2	0.0365586	HNSC
GO:1900106	BP	positive regulation of hyaluranon cable assembly	3	2	0.0365586	HNSC
GO:0031514	CC	motile cilium	235	22	0.0366471	HNSC
GO:1901185	BP	negative regulation of ERBB signaling pathway	31	6	0.0367422	HNSC
GO:0090312	BP	positive regulation of protein deacetylation	29	6	0.0367614	HNSC
GO:0003174	BP	mitral valve development	11	4	0.0369782	HNSC
GO:0071044	BP	histone mRNA catabolic process	11	3	0.0370206	HNSC
GO:1904707	BP	positive regulation of vascular associated smooth muscle cell proliferation	50	8	0.0370866	HNSC
GO:0019788	MF	NEDD8 transferase activity	6	2	0.0371459	HNSC
GO:1905832	BP	positive regulation of spindle assembly	8	3	0.0372254	HNSC
GO:0072110	BP	glomerular mesangial cell proliferation	12	4	0.0372786	HNSC
GO:1901976	BP	regulation of cell cycle checkpoint	48	8	0.0372872	HNSC
GO:0042659	BP	regulation of cell fate specification	25	6	0.0373123	HNSC
GO:1900114	BP	positive regulation of histone H3-K9 trimethylation	4	2	0.0376051	HNSC
GO:0060324	BP	face development	50	10	0.0376749	HNSC
GO:0045763	BP	negative regulation of cellular amino acid metabolic process	4	2	0.0377522	HNSC
GO:1901575	BP	organic substance catabolic process	2050	172	0.0377565	HNSC
GO:0000819	BP	sister chromatid segregation	231	24	0.037792	HNSC
GO:0030027	CC	lamellipodium	202	27	0.0379358	HNSC
GO:0043540	CC	6-phosphofructo-2-kinase/fructose-2,6-biphosphatase complex	1	1	0.038037	HNSC
GO:0050998	MF	nitric-oxide synthase binding	13	4	0.0381074	HNSC
GO:0032154	CC	cleavage furrow	52	9	0.0381645	HNSC
GO:1904776	BP	regulation of protein localization to cell cortex	9	3	0.038729	HNSC
GO:0009310	BP	amine catabolic process	18	4	0.0387783	HNSC
GO:0002029	BP	desensitization of G protein-coupled receptor signaling pathway	19	4	0.0388868	HNSC
GO:0022401	BP	negative adaptation of signaling pathway	19	4	0.0388868	HNSC
GO:0046621	BP	negative regulation of organ growth	38	7	0.0389826	HNSC
GO:0099092	CC	postsynaptic density, intracellular component	8	3	0.0389844	HNSC
GO:0042586	MF	peptide deformylase activity	1	1	0.0391913	HNSC
GO:0014897	BP	striated muscle hypertrophy	102	14	0.039222	HNSC
GO:2000279	BP	negative regulation of DNA biosynthetic process	36	6	0.0392623	HNSC
GO:0031062	BP	positive regulation of histone methylation	51	8	0.0392747	HNSC
GO:0005829	CC	cytosol	5257	432	0.039326	HNSC
GO:0036126	CC	sperm flagellum	145	15	0.0393726	HNSC
GO:0061640	BP	cytoskeleton-dependent cytokinesis	111	14	0.0396648	HNSC
GO:0051014	BP	actin filament severing	16	4	0.0397214	HNSC
GO:0003365	BP	establishment of cell polarity involved in ameboidal cell migration	3	2	0.0397658	HNSC
GO:0015630	CC	microtubule cytoskeleton	1335	120	0.0399259	HNSC
GO:0031113	BP	regulation of microtubule polymerization	53	9	0.0399491	HNSC
GO:0006446	BP	regulation of translational initiation	77	10	0.0399897	HNSC
GO:0006511	BP	ubiquitin-dependent protein catabolic process	650	61	0.0400149	HNSC
GO:0016268	BP	O-glycan processing, core 2	1	1	0.0400734	HNSC
GO:0010564	BP	regulation of cell cycle process	720	67	0.0401721	HNSC
GO:0043202	CC	lysosomal lumen	97	13	0.0404086	HNSC
GO:0006891	BP	intra-Golgi vesicle-mediated transport	32	5	0.0406539	HNSC
GO:1902494	CC	catalytic complex	1602	131	0.040711	HNSC
GO:2000118	BP	regulation of sodium-dependent phosphate transport	5	2	0.0409357	HNSC
GO:0043966	BP	histone H3 acetylation	78	11	0.0411286	HNSC
GO:0006949	BP	syncytium formation	65	11	0.0413933	HNSC
GO:0001675	BP	acrosome assembly	23	4	0.0415535	HNSC
GO:0098784	BP	biofilm matrix organization	1	1	0.0419426	HNSC
GO:0098786	BP	biofilm matrix disassembly	1	1	0.0419426	HNSC
GO:0072659	BP	protein localization to plasma membrane	281	34	0.0423919	HNSC
GO:0008115	MF	sarcosine oxidase activity	1	1	0.0424697	HNSC
GO:0033514	BP	L-lysine catabolic process to acetyl-CoA via L-pipecolate	1	1	0.0424697	HNSC
GO:0050031	MF	L-pipecolate oxidase activity	1	1	0.0424697	HNSC
GO:0001002	MF	RNA polymerase III type 1 promoter sequence-specific DNA binding	3	2	0.0428086	HNSC
GO:0001003	MF	RNA polymerase III type 2 promoter sequence-specific DNA binding	3	2	0.0428086	HNSC
GO:0080084	MF	5S rDNA binding	3	2	0.0428086	HNSC
GO:0004341	MF	gluconolactonase activity	1	1	0.0431212	HNSC
GO:1903011	BP	negative regulation of bone development	1	1	0.0431212	HNSC
GO:1903611	BP	negative regulation of calcium-dependent ATPase activity	1	1	0.0431212	HNSC
GO:1903627	BP	regulation of dUTP diphosphatase activity	1	1	0.0431212	HNSC
GO:1903629	BP	positive regulation of dUTP diphosphatase activity	1	1	0.0431212	HNSC
GO:1903631	BP	negative regulation of aminoacyl-tRNA ligase activity	1	1	0.0431212	HNSC
GO:1903633	BP	regulation of leucine-tRNA ligase activity	1	1	0.0431212	HNSC
GO:1903634	BP	negative regulation of leucine-tRNA ligase activity	1	1	0.0431212	HNSC
GO:0031499	CC	TRAMP complex	5	2	0.0431678	HNSC
GO:1990172	BP	G protein-coupled receptor catabolic process	1	1	0.0432218	HNSC
GO:0000252	MF	C-3 sterol dehydrogenase (C-4 sterol decarboxylase) activity	1	1	0.0434696	HNSC
GO:0047012	MF	sterol-4-alpha-carboxylate 3-dehydrogenase (decarboxylating) activity	1	1	0.0434696	HNSC
GO:0102175	MF	3-beta-hydroxysteroid dehydrogenase/C4-decarboxylase activity	1	1	0.0434696	HNSC
GO:0103066	MF	4alpha-carboxy-4beta-methyl-5alpha-cholesta-8-en-3beta-ol:NAD(P)+ 3-oxidoreductase (decarboxylating) activity	1	1	0.0434696	HNSC
GO:0103067	MF	4alpha-carboxy-5alpha-cholesta-8-en-3beta-ol:NAD(P)+ 3-dehydrogenase (decarboxylating) activity	1	1	0.0434696	HNSC
GO:0016647	MF	oxidoreductase activity, acting on the CH-NH group of donors, oxygen as acceptor	4	2	0.0436402	HNSC
GO:0005657	CC	replication fork	65	9	0.0437302	HNSC
GO:0014896	BP	muscle hypertrophy	104	14	0.0437599	HNSC
GO:0035717	MF	chemokine (C-C motif) ligand 7 binding	1	1	0.0439304	HNSC
GO:0010611	BP	regulation of cardiac muscle hypertrophy	69	10	0.0439795	HNSC
GO:0051001	BP	negative regulation of nitric-oxide synthase activity	12	3	0.0441078	HNSC
GO:0002030	BP	inhibitory G protein-coupled receptor phosphorylation	1	1	0.0441817	HNSC
GO:0060182	MF	apelin receptor activity	1	1	0.0441817	HNSC
GO:1904323	BP	regulation of inhibitory G protein-coupled receptor phosphorylation	1	1	0.0441817	HNSC
GO:1904325	BP	positive regulation of inhibitory G protein-coupled receptor phosphorylation	1	1	0.0441817	HNSC
GO:0001843	BP	neural tube closure	92	15	0.0441834	HNSC
GO:0003058	BP	hormonal regulation of the force of heart contraction	1	1	0.044189	HNSC
GO:0009932	BP	cell tip growth	1	1	0.044189	HNSC
GO:0097728	CC	9+0 motile cilium	5	2	0.044299	HNSC
GO:0001156	MF	TFIIIC-class transcription factor complex binding	3	2	0.0443952	HNSC
GO:0030981	CC	cortical microtubule cytoskeleton	3	2	0.0444187	HNSC
GO:0007017	BP	microtubule-based process	907	83	0.0444528	HNSC
GO:0021815	BP	modulation of microtubule cytoskeleton involved in cerebral cortex radial glia guided migration	3	2	0.0445919	HNSC
GO:0010639	BP	negative regulation of organelle organization	352	38	0.0447289	HNSC
GO:0072177	BP	mesonephric duct development	9	3	0.044832	HNSC
GO:0005096	MF	GTPase activator activity	247	31	0.0448338	HNSC
GO:0090571	CC	RNA polymerase II transcription repressor complex	15	4	0.0450273	HNSC
GO:0033227	BP	dsRNA transport	3	2	0.0452798	HNSC
GO:1990838	MF	poly(U)-specific exoribonuclease activity, producing 3' uridine cyclic phosphate ends	1	1	0.0453023	HNSC
GO:0097167	BP	circadian regulation of translation	4	2	0.0453477	HNSC
GO:1900825	BP	regulation of membrane depolarization during cardiac muscle cell action potential	5	2	0.0454308	HNSC
GO:0014804	CC	terminal cisterna lumen	1	1	0.0454518	HNSC
GO:0038009	BP	regulation of signal transduction by receptor internalization	1	1	0.045499	HNSC
GO:0051394	BP	regulation of nerve growth factor receptor activity	1	1	0.045499	HNSC
GO:0060299	BP	negative regulation of sarcomere organization	1	1	0.045499	HNSC
GO:1900826	BP	negative regulation of membrane depolarization during cardiac muscle cell action potential	1	1	0.045499	HNSC
GO:0090329	BP	regulation of DNA-templated DNA replication	56	8	0.0454994	HNSC
GO:1900542	BP	regulation of purine nucleotide metabolic process	91	12	0.0455204	HNSC
GO:0014028	BP	notochord formation	3	2	0.045556	HNSC
GO:0030575	BP	nuclear body organization	17	4	0.0455764	HNSC
GO:0140014	BP	mitotic nuclear division	322	32	0.0459483	HNSC
GO:0071318	BP	cellular response to ATP	18	4	0.0460856	HNSC
GO:0009057	BP	macromolecule catabolic process	1341	117	0.0461321	HNSC
GO:0008253	MF	5'-nucleotidase activity	12	3	0.0461423	HNSC
GO:0051543	BP	regulation of elastin biosynthetic process	1	1	0.0464425	HNSC
GO:0051545	BP	negative regulation of elastin biosynthetic process	1	1	0.0464425	HNSC
GO:0016269	BP	O-glycan processing, core 3	1	1	0.0464466	HNSC
GO:0047224	MF	acetylgalactosaminyl-O-glycosyl-glycoprotein beta-1,3-N-acetylglucosaminyltransferase activity	1	1	0.0464466	HNSC
GO:0106327	MF	acetylgalactosaminyl-O-glycosyl-threonyl-glycoprotein beta-1,3-N-acetylglucosaminyltransferase activity	1	1	0.0464466	HNSC
GO:0106328	MF	acetylgalactosaminyl-O-glycosyl-seryl-glycoprotein beta-1,3-N-acetylglucosaminyltransferase activity	1	1	0.0464466	HNSC
GO:0009810	BP	stilbene metabolic process	1	1	0.0464896	HNSC
GO:0033885	MF	10-hydroxy-9-(phosphonooxy)octadecanoate phosphatase activity	1	1	0.0464896	HNSC
GO:0046272	BP	stilbene catabolic process	1	1	0.0464896	HNSC
GO:0120256	BP	olefinic compound catabolic process	1	1	0.0464896	HNSC
GO:0036497	BP	eIF2alpha dephosphorylation in response to endoplasmic reticulum stress	1	1	0.0465687	HNSC
GO:1902310	BP	positive regulation of peptidyl-serine dephosphorylation	1	1	0.0465687	HNSC
GO:1903916	BP	regulation of endoplasmic reticulum stress-induced eIF2 alpha dephosphorylation	1	1	0.0465687	HNSC
GO:1903917	BP	positive regulation of endoplasmic reticulum stress-induced eIF2 alpha dephosphorylation	1	1	0.0465687	HNSC
GO:0010770	BP	positive regulation of cell morphogenesis involved in differentiation	81	13	0.0465803	HNSC
GO:0060606	BP	tube closure	93	15	0.0466426	HNSC
GO:0048666	BP	neuron development	1098	124	0.046727	HNSC
GO:0004408	MF	holocytochrome-c synthase activity	1	1	0.0467429	HNSC
GO:0017003	BP	protein-heme linkage	1	1	0.0467429	HNSC
GO:0017006	BP	protein-tetrapyrrole linkage	1	1	0.0467429	HNSC
GO:0018063	BP	cytochrome c-heme linkage	1	1	0.0467429	HNSC
GO:0003344	BP	pericardium morphogenesis	8	3	0.046964	HNSC
GO:0023058	BP	adaptation of signaling pathway	21	4	0.0470946	HNSC
GO:0051823	BP	regulation of synapse structural plasticity	7	3	0.047154	HNSC
GO:0060254	BP	regulation of N-terminal protein palmitoylation	1	1	0.0472254	HNSC
GO:0060262	BP	negative regulation of N-terminal protein palmitoylation	1	1	0.0472254	HNSC
GO:0052858	MF	peptidyl-lysine acetyltransferase activity	1	1	0.0475007	HNSC
GO:0060304	BP	regulation of phosphatidylinositol dephosphorylation	6	2	0.0475512	HNSC
GO:0021797	BP	forebrain anterior/posterior pattern specification	3	2	0.047572	HNSC
GO:0010799	BP	regulation of peptidyl-threonine phosphorylation	45	8	0.0475751	HNSC
GO:0003299	BP	muscle hypertrophy in response to stress	31	6	0.047681	HNSC
GO:0014887	BP	cardiac muscle adaptation	31	6	0.047681	HNSC
GO:0014898	BP	cardiac muscle hypertrophy in response to stress	31	6	0.047681	HNSC
GO:0030182	BP	neuron differentiation	1365	151	0.0477085	HNSC
GO:0047323	MF	[3-methyl-2-oxobutanoate dehydrogenase (acetyl-transferring)] kinase activity	1	1	0.0479781	HNSC
GO:0014820	BP	tonic smooth muscle contraction	11	3	0.0480076	HNSC
GO:1902285	BP	semaphorin-plexin signaling pathway involved in neuron projection guidance	16	5	0.048018	HNSC
GO:0033269	CC	internode region of axon	3	2	0.0480191	HNSC
GO:0016052	BP	carbohydrate catabolic process	152	18	0.0481615	HNSC
GO:0050812	BP	regulation of acyl-CoA biosynthetic process	5	2	0.0481708	HNSC
GO:0010256	BP	endomembrane system organization	569	55	0.0483255	HNSC
GO:0004486	MF	methylenetetrahydrofolate dehydrogenase [NAD(P)+] activity	4	2	0.0485039	HNSC
GO:0004488	MF	methylenetetrahydrofolate dehydrogenase (NADP+) activity	4	2	0.0485039	HNSC
GO:0022604	BP	regulation of cell morphogenesis	307	38	0.0485216	HNSC
GO:0031420	MF	alkali metal ion binding	17	4	0.0485417	HNSC
GO:0071818	CC	BAT3 complex	3	2	0.0485826	HNSC
GO:0030178	BP	negative regulation of Wnt signaling pathway	170	24	0.0487455	HNSC
GO:0010171	BP	body morphogenesis	47	9	0.0487507	HNSC
GO:0031116	BP	positive regulation of microtubule polymerization	32	6	0.0489616	HNSC
GO:0045787	BP	positive regulation of cell cycle	337	36	0.0490271	HNSC
GO:0098944	CC	postsynaptic recycling endosome membrane	1	1	0.0490706	HNSC
GO:0098949	CC	intrinsic component of postsynaptic endosome membrane	1	1	0.0490706	HNSC
GO:0098951	CC	intrinsic component of postsynaptic recycling endosome membrane	1	1	0.0490706	HNSC
GO:0099033	CC	anchored component of postsynaptic recycling endosome membrane	1	1	0.0490706	HNSC
GO:0099034	CC	anchored component of postsynaptic endosome membrane	1	1	0.0490706	HNSC
GO:0021801	BP	cerebral cortex radial glia-guided migration	24	6	0.0491257	HNSC
GO:0022030	BP	telencephalon glial cell migration	24	6	0.0491257	HNSC
GO:1905857	BP	positive regulation of pentose-phosphate shunt	3	2	0.049307	HNSC
GO:1902745	BP	positive regulation of lamellipodium organization	37	7	0.0495234	HNSC
GO:0006623	BP	protein targeting to vacuole	42	7	0.0496228	HNSC
GO:2000278	BP	regulation of DNA biosynthetic process	120	15	0.049675	HNSC
GO:1903772	BP	regulation of viral budding via host ESCRT complex	4	2	0.0496817	HNSC
GO:0019941	BP	modification-dependent protein catabolic process	660	61	0.0496973	HNSC
