# Supplementary material for: Attenuated sex-related DNA methylation differences in cancer highlight the magnitude bias mediating existing disparities
Source: Biol Sex Differ. 2024 Dec 23;15:106. doi: 10.1186/s13293-024-00682-4 (PMC11664931; doi:10.1186/s13293-024-00682-4)
Supplement: Supplementary file 16 — Supplementary material 16. [file 13293_2024_682_MOESM16_ESM.xlsx]

## Sheet: SynGO
sex-amplified genes	group	gene name	GO term ID	GO term name	GO domain
NPTN	female-amplifier	neuroplastin	GO:0099557	trans-synaptic signaling by trans-synaptic complex, modulating synaptic transmission (GO:0099557)	BP
NAPA	female-amplifier	NSF attachment protein alpha	GO:0016082	synaptic vesicle priming (GO:0016082)	BP
RIMS1	female-amplifier	regulating synaptic membrane exocytosis 1	GO:0016082	synaptic vesicle priming (GO:0016082)	BP
RIMS1	female-amplifier	regulating synaptic membrane exocytosis 1	GO:0016081	synaptic vesicle docking (GO:0016081)	BP
RIMS1	female-amplifier	regulating synaptic membrane exocytosis 1	GO:0098882	structural constituent of active zone (GO:0098882)	BP
PRKCA	female-amplifier	protein kinase C alpha	GO:2000300	regulation of synaptic vesicle exocytosis (GO:2000300)	BP
CTBP2	female-amplifier	C-terminal binding protein 2	GO:0016081	synaptic vesicle docking (GO:0016081)	BP
PRKCE	female-amplifier	protein kinase C epsilon	GO:0099171	presynaptic modulation of chemical synaptic transmission (GO:0099171)	BP
ARL8B	female-amplifier	ADP ribosylation factor like GTPase 8B	GO:1903742	regulation of anterograde synaptic vesicle transport (GO:1903742)	BP
PRKCZ	female-amplifier	protein kinase C zeta	GO:0098696	regulation of neurotransmitter receptor localization to postsynaptic specialization membrane (GO:0098696)	BP
PRKCI	female-amplifier	protein kinase C iota	GO:0099072	regulation of postsynaptic membrane neurotransmitter receptor levels (GO:0099072)	BP
EFNB2	female-amplifier	ephrin B2	GO:0099072	regulation of postsynaptic membrane neurotransmitter receptor levels (GO:0099072)	BP
KCNJ9	female-amplifier	potassium inwardly rectifying channel subfamily J member 9	GO:0099505	regulation of presynaptic membrane potential (GO:0099505)	BP
RIMS3	female-amplifier	regulating synaptic membrane exocytosis 3	GO:0050807	regulation of synapse organization (GO:0050807)	BP
EFNB2	female-amplifier	ephrin B2	GO:0099149	regulation of postsynaptic neurotransmitter receptor endocytosis (GO:0099149)	BP
EFNB2	female-amplifier	ephrin B2	GO:0099054	presynapse assembly (GO:0099054)	BP
CTBP1	female-amplifier	C-terminal binding protein 1	GO:0099526	presynapse to nucleus signaling pathway (GO:0099526)	BP
RIMS1	female-amplifier	regulating synaptic membrane exocytosis 1	GO:0098882	structural constituent of active zone (GO:0098882)	BP
PRKAR1B	female-amplifier	protein kinase cAMP-dependent type I regulatory subunit beta	GO:0050804	modulation of chemical synaptic transmission (GO:0050804)	BP
PRKAR1B	female-amplifier	protein kinase cAMP-dependent type I regulatory subunit beta	GO:0098693	regulation of synaptic vesicle cycle (GO:0098693)	BP
PRKAR1B	female-amplifier	protein kinase cAMP-dependent type I regulatory subunit beta	GO:0050804	modulation of chemical synaptic transmission (GO:0050804)	BP
CYFIP1	female-amplifier	cytoplasmic FMR1 interacting protein 1	GO:1905274	regulation of modification of postsynaptic actin cytoskeleton (GO:1905274)	BP
CTBP2	female-amplifier	C-terminal binding protein 2	GO:0098882	structural constituent of active zone (GO:0098882)	BP
AGRN	female-amplifier	agrin	GO:0050807	regulation of synapse organization (GO:0050807)	BP
BAIAP2	female-amplifier	BAR/IMD domain containing adaptor protein 2	GO:0050804	modulation of chemical synaptic transmission (GO:0050804)	BP
EIF4E	female-amplifier	eukaryotic translation initiation factor 4E	GO:0099578	regulation of translation at postsynapse, modulating synaptic transmission (GO:0099578)	BP
TRIM3	female-amplifier	tripartite motif containing 3	GO:0140252	regulation protein catabolic process at postsynapse (GO:0140252)	BP
PICALM	female-amplifier	phosphatidylinositol binding clathrin assembly protein	GO:0048488	synaptic vesicle endocytosis (GO:0048488)	BP
NAPA	female-amplifier	NSF attachment protein alpha	GO:0010807	regulation of synaptic vesicle priming (GO:0010807)	BP
SLC6A9	female-amplifier	solute carrier family 6 member 9	GO:0001504	neurotransmitter uptake (GO:0001504)	BP
CTTN	female-amplifier	cortactin	GO:0098885	modification of postsynaptic actin cytoskeleton (GO:0098885)	BP
SLC1A7	female-amplifier	solute carrier family 1 member 7	GO:0001504	neurotransmitter uptake (GO:0001504)	BP
SLC6A6	female-amplifier	solute carrier family 6 member 6	SYNGO:transport	transport	BP
NRXN3	female-amplifier	neurexin 3	GO:0099072	regulation of postsynaptic membrane neurotransmitter receptor levels (GO:0099072)	BP
NRXN3	female-amplifier	neurexin 3	GO:0099171	presynaptic modulation of chemical synaptic transmission (GO:0099171)	BP
DOCK1	female-amplifier	dedicator of cytokinesis 1	GO:0097091	synaptic vesicle clustering (GO:0097091)	BP
CTBP1	female-amplifier	C-terminal binding protein 1	GO:0099526	presynapse to nucleus signaling pathway (GO:0099526)	BP
PLCB4	female-amplifier	phospholipase C beta 4	GO:0050804	modulation of chemical synaptic transmission (GO:0050804)	BP
ODZ2	female-amplifier	teneurin transmembrane protein 2	GO:0099559	maintenance of alignment of postsynaptic density and presynaptic active zone (GO:0099559)	BP
ODZ4	female-amplifier	teneurin transmembrane protein 4	GO:0099559	maintenance of alignment of postsynaptic density and presynaptic active zone (GO:0099559)	BP
ODZ2	female-amplifier	teneurin transmembrane protein 2	GO:0099190	postsynaptic spectrin-associated cytoskeleton organization (GO:0099190)	BP
ODZ4	female-amplifier	teneurin transmembrane protein 4	GO:0099190	postsynaptic spectrin-associated cytoskeleton organization (GO:0099190)	BP
SDCBP	female-amplifier	syndecan binding protein	GO:0099054	presynapse assembly (GO:0099054)	BP
PLD1	female-amplifier	phospholipase D1	GO:0098693	regulation of synaptic vesicle cycle (GO:0098693)	BP
ANKS1B	female-amplifier	ankyrin repeat and sterile alpha motif domain containing 1B	GO:0099527	postsynapse to nucleus signaling pathway (GO:0099527)	BP
CTTN	female-amplifier	cortactin	GO:0098885	modification of postsynaptic actin cytoskeleton (GO:0098885)	BP
ODZ2	female-amplifier	teneurin transmembrane protein 2	GO:0098942	retrograde trans-synaptic signaling by trans-synaptic protein complex (GO:0098942)	BP
AP2M1	female-amplifier	adaptor related protein complex 2 subunit mu 1	GO:0048488	synaptic vesicle endocytosis (GO:0048488)	BP
PPFIA1	female-amplifier	PTPRF interacting protein alpha 1	GO:0099054	presynapse assembly (GO:0099054)	BP
PPFIA4	female-amplifier	PTPRF interacting protein alpha 4	GO:0099054	presynapse assembly (GO:0099054)	BP
PPFIBP2	female-amplifier	PPFIA binding protein 2	GO:0051963	regulation of synapse assembly (GO:0051963)	BP
IQSEC1	female-amplifier	IQ motif and Sec7 domain ArfGEF 1	GO:0099149	regulation of postsynaptic neurotransmitter receptor endocytosis (GO:0099149)	BP
STAT3	female-amplifier	signal transducer and activator of transcription 3	GO:0099527	postsynapse to nucleus signaling pathway (GO:0099527)	BP
STAT3	female-amplifier	signal transducer and activator of transcription 3	GO:0050804	modulation of chemical synaptic transmission (GO:0050804)	BP
STXBP5	female-amplifier	syntaxin binding protein 5	GO:0010807	regulation of synaptic vesicle priming (GO:0010807)	BP
EHD1	female-amplifier	EH domain containing 1	GO:0048488	synaptic vesicle endocytosis (GO:0048488)	BP
STXBP5	female-amplifier	syntaxin binding protein 5	GO:0099161	regulation of presynaptic dense core vesicle exocytosis (GO:0099161)	BP
STXBP5	female-amplifier	syntaxin binding protein 5	GO:0099504	synaptic vesicle cycle (GO:0099504)	BP
NELF	female-amplifier	NMDA receptor synaptonuclear signaling and neuronal migration factor	GO:0099527	postsynapse to nucleus signaling pathway (GO:0099527)	BP
ANKS1B	female-amplifier	ankyrin repeat and sterile alpha motif domain containing 1B	GO:0099565	postsynaptic process involved in chemical synaptic transmission (GO:0099565)	BP
PPP3CA	female-amplifier	protein phosphatase 3 catalytic subunit alpha	GO:0099170	postsynaptic modulation of chemical synaptic transmission (GO:0099170)	BP
ARL6IP5	female-amplifier	ADP ribosylation factor like GTPase 6 interacting protein 5	GO:0051580	regulation of neurotransmitter uptake (GO:0051580)	BP
CYFIP1	female-amplifier	cytoplasmic FMR1 interacting protein 1	GO:0099578	regulation of translation at postsynapse, modulating synaptic transmission (GO:0099578)	BP
SYNGAP1	female-amplifier	synaptic Ras GTPase activating protein 1	GO:0098880	maintenance of postsynaptic specialization structure (GO:0098880)	BP
STXBP5	female-amplifier	syntaxin binding protein 5	GO:0010807	regulation of synaptic vesicle priming (GO:0010807)	BP
STXBP5	female-amplifier	syntaxin binding protein 5	GO:0099148	regulation of synaptic vesicle docking (GO:0099148)	BP
STXBP5	female-amplifier	syntaxin binding protein 5	GO:0010807	regulation of synaptic vesicle priming (GO:0010807)	BP
STXBP5	female-amplifier	syntaxin binding protein 5	GO:0099161	regulation of presynaptic dense core vesicle exocytosis (GO:0099161)	BP
STXBP5	female-amplifier	syntaxin binding protein 5	GO:2000300	regulation of synaptic vesicle exocytosis (GO:2000300)	BP
HTT	female-amplifier	huntingtin	GO:0099527	postsynapse to nucleus signaling pathway (GO:0099527)	BP
KPNA1	female-amplifier	karyopherin subunit alpha 1	GO:0099527	postsynapse to nucleus signaling pathway (GO:0099527)	BP
SPTBN2	female-amplifier	spectrin beta, non-erythrocytic 2	GO:0099173	postsynapse organization (GO:0099173)	BP
NTN1	female-amplifier	netrin 1	GO:0051963	regulation of synapse assembly (GO:0051963)	BP
ATP2B2	female-amplifier	ATPase plasma membrane Ca2+ transporting 2	GO:1905059	ATPase-coupled calcium ion transmembrane transporter activity involved in regulation of postsynaptic cytosolic calcium levels (GO:1905059)	BP
BAIAP2	female-amplifier	BAR/IMD domain containing adaptor protein 2	GO:0050804	modulation of chemical synaptic transmission (GO:0050804)	BP
CABP1	female-amplifier	calcium binding protein 1	GO:0099527	postsynapse to nucleus signaling pathway (GO:0099527)	BP
BIN1	female-amplifier	bridging integrator 1	GO:0048488	synaptic vesicle endocytosis (GO:0048488)	BP
KCNJ11	female-amplifier	potassium inwardly rectifying channel subfamily J member 11	GO:0099508	voltage-gated ion channel activity involved in regulation of presynaptic membrane potential (GO:0099508)	BP
BAIAP2	female-amplifier	BAR/IMD domain containing adaptor protein 2	GO:1905274	regulation of modification of postsynaptic actin cytoskeleton (GO:1905274)	BP
APBB1	female-amplifier	amyloid beta precursor protein binding family B member 1	GO:0050808	synapse organization (GO:0050808)	BP
TUBB	female-amplifier	tubulin beta class I	GO:0050807	regulation of synapse organization (GO:0050807)	BP
BACE1	female-amplifier	beta-secretase 1	GO:0099171	presynaptic modulation of chemical synaptic transmission (GO:0099171)	BP
SPTBN2	female-amplifier	spectrin beta, non-erythrocytic 2	GO:0099186	structural constituent of postsynapse (GO:0099186)	BP
FYN	female-amplifier	FYN proto-oncogene, Src family tyrosine kinase	GO:0050804	modulation of chemical synaptic transmission (GO:0050804)	BP
DGKQ	female-amplifier	diacylglycerol kinase theta	GO:1900242	regulation of synaptic vesicle endocytosis (GO:1900242)	BP
NRXN3	female-amplifier	neurexin 3	GO:0099171	presynaptic modulation of chemical synaptic transmission (GO:0099171)	BP
FARP1	female-amplifier	FERM, ARH/RhoGEF and pleckstrin domain protein 1	GO:1905606	regulation of presynapse assembly (GO:1905606)	BP
FARP1	female-amplifier	FERM, ARH/RhoGEF and pleckstrin domain protein 1	GO:0098974	postsynaptic actin cytoskeleton organization (GO:0098974)	BP
SIPA1L1	female-amplifier	signal induced proliferation associated 1 like 1	GO:0098974	postsynaptic actin cytoskeleton organization (GO:0098974)	BP
ODZ2	female-amplifier	teneurin transmembrane protein 2	GO:0099559	maintenance of alignment of postsynaptic density and presynaptic active zone (GO:0099559)	BP
ODZ4	female-amplifier	teneurin transmembrane protein 4	GO:0099559	maintenance of alignment of postsynaptic density and presynaptic active zone (GO:0099559)	BP
SIPA1L1	female-amplifier	signal induced proliferation associated 1 like 1	GO:0099151	regulation of postsynaptic density assembly (GO:0099151)	BP
SEMA3F	female-amplifier	semaphorin 3F	GO:0099175	regulation of postsynapse organization (GO:0099175)	BP
PAK1	female-amplifier	p21 (RAC1) activated kinase 1	GO:0090128	regulation of synapse maturation (GO:0090128)	BP
PAK2	female-amplifier	p21 (RAC1) activated kinase 2	GO:0090128	regulation of synapse maturation (GO:0090128)	BP
GRIK2	female-amplifier	glutamate ionotropic receptor kainate type subunit 2	GO:0099507	ligand-gated ion channel activity involved in regulation of presynaptic membrane potential (GO:0099507)	BP
SHANK2	female-amplifier	SH3 and multiple ankyrin repeat domains 2	GO:0098919	structural constituent of postsynaptic density (GO:0098919)	BP
SHANK2	female-amplifier	SH3 and multiple ankyrin repeat domains 2	GO:0099175	regulation of postsynapse organization (GO:0099175)	BP
CHRNE	female-amplifier	cholinergic receptor nicotinic epsilon subunit	GO:1904315	transmitter-gated ion channel activity involved in regulation of postsynaptic membrane potential (GO:1904315)	BP
CHRNB1	female-amplifier	cholinergic receptor nicotinic beta 1 subunit	GO:1904315	transmitter-gated ion channel activity involved in regulation of postsynaptic membrane potential (GO:1904315)	BP
CHRNE	female-amplifier	cholinergic receptor nicotinic epsilon subunit	GO:1904315	transmitter-gated ion channel activity involved in regulation of postsynaptic membrane potential (GO:1904315)	BP
CHRNA3	female-amplifier	cholinergic receptor nicotinic alpha 3 subunit	GO:1904315	transmitter-gated ion channel activity involved in regulation of postsynaptic membrane potential (GO:1904315)	BP
CHRNA3	female-amplifier	cholinergic receptor nicotinic alpha 3 subunit	GO:0099171	presynaptic modulation of chemical synaptic transmission (GO:0099171)	BP
GLRA2	female-amplifier	glycine receptor alpha 2	GO:1904315	transmitter-gated ion channel activity involved in regulation of postsynaptic membrane potential (GO:1904315)	BP
BDNF	female-amplifier	brain derived neurotrophic factor	GO:0099183	trans-synaptic signaling by BDNF, modulating synaptic transmission (GO:0099183)	BP
KALRN	female-amplifier	kalirin RhoGEF kinase	GO:0098696	regulation of neurotransmitter receptor localization to postsynaptic specialization membrane (GO:0098696)	BP
D4S234E	female-amplifier	neuronal vesicle trafficking associated 1	GO:0098887	neurotransmitter receptor transport, endosome to postsynaptic membrane (GO:0098887)	BP
SYNE1	female-amplifier	spectrin repeat containing nuclear envelope protein 1	GO:0099149	regulation of postsynaptic neurotransmitter receptor endocytosis (GO:0099149)	BP
MYH10	female-amplifier	myosin heavy chain 10	GO:1905274	regulation of modification of postsynaptic actin cytoskeleton (GO:1905274)	BP
SNAP47	female-amplifier	synaptosome associated protein 47	GO:0098967	exocytic insertion of neurotransmitter receptor to postsynaptic membrane (GO:0098967)	BP
AP2M1	female-amplifier	adaptor related protein complex 2 subunit mu 1	GO:0098884	postsynaptic neurotransmitter receptor endocytosis (GO:0098884)	BP
KALRN	female-amplifier	kalirin RhoGEF kinase	GO:1905274	regulation of modification of postsynaptic actin cytoskeleton (GO:1905274)	BP
PRR7	female-amplifier	proline rich 7, synaptic	GO:0099527	postsynapse to nucleus signaling pathway (GO:0099527)	BP
APP	female-amplifier	amyloid beta precursor protein	GO:1905606	regulation of presynapse assembly (GO:1905606)	BP
CDH8	female-amplifier	cadherin 8	GO:0050807	regulation of synapse organization (GO:0050807)	BP
FARP1	female-amplifier	FERM, ARH/RhoGEF and pleckstrin domain protein 1	GO:0098942	retrograde trans-synaptic signaling by trans-synaptic protein complex (GO:0098942)	BP
PTPRF	female-amplifier	protein tyrosine phosphatase receptor type F	GO:0099175	regulation of postsynapse organization (GO:0099175)	BP
SLC6A6	female-amplifier	solute carrier family 6 member 6	GO:0050804	modulation of chemical synaptic transmission (GO:0050804)	BP
PAK1	female-amplifier	p21 (RAC1) activated kinase 1	GO:0150036	regulation of trans-synaptic signaling by endocannabinoid, modulating synaptic transmission (GO:0150036)	BP
GAPDH	female-amplifier	glyceraldehyde-3-phosphate dehydrogenase	SYNGO:postsyn_ATPmetabolic	ATP metabolic process in the postsynapse	BP
GAPDH	female-amplifier	glyceraldehyde-3-phosphate dehydrogenase	GO:0099162	regulation of synaptic vesicle neurotransmitter loading (GO:0099162)	BP
ABR	female-amplifier	ABR activator of RhoGEF and GTPase	GO:0050804	modulation of chemical synaptic transmission (GO:0050804)	BP
BCR	female-amplifier	BCR activator of RhoGEF and GTPase	GO:0050804	modulation of chemical synaptic transmission (GO:0050804)	BP
TANC1	female-amplifier	tetratricopeptide repeat, ankyrin repeat and coiled-coil containing 1	GO:0099175	regulation of postsynapse organization (GO:0099175)	BP
TSC2	female-amplifier	TSC complex subunit 2	GO:0099175	regulation of postsynapse organization (GO:0099175)	BP
CACNB4	female-amplifier	calcium voltage-gated channel auxiliary subunit beta 4	GO:0099626	voltage-gated calcium channel activity involved in regulation of presynaptic cytosolic calcium levels (GO:0099626)	BP
GRM4	female-amplifier	glutamate metabotropic receptor 4	GO:0099171	presynaptic modulation of chemical synaptic transmission (GO:0099171)	BP
PAK1	female-amplifier	p21 (RAC1) activated kinase 1	GO:0098696	regulation of neurotransmitter receptor localization to postsynaptic specialization membrane (GO:0098696)	BP
PAK2	female-amplifier	p21 (RAC1) activated kinase 2	GO:0098696	regulation of neurotransmitter receptor localization to postsynaptic specialization membrane (GO:0098696)	BP
PAK1	female-amplifier	p21 (RAC1) activated kinase 1	GO:0098696	regulation of neurotransmitter receptor localization to postsynaptic specialization membrane (GO:0098696)	BP
PAK2	female-amplifier	p21 (RAC1) activated kinase 2	GO:0098696	regulation of neurotransmitter receptor localization to postsynaptic specialization membrane (GO:0098696)	BP
CACNB4	female-amplifier	calcium voltage-gated channel auxiliary subunit beta 4	GO:2000300	regulation of synaptic vesicle exocytosis (GO:2000300)	BP
NGEF	female-amplifier	neuronal guanine nucleotide exchange factor	GO:1905806	regulation of synapse disassembly (GO:1905806)	BP
PTPRF	female-amplifier	protein tyrosine phosphatase receptor type F	GO:0099560	synapse adhesion between pre- and post-synapse (GO:0099560)	BP
PTPRF	female-amplifier	protein tyrosine phosphatase receptor type F	GO:0099560	synapse adhesion between pre- and post-synapse (GO:0099560)	BP
PTPRF	female-amplifier	protein tyrosine phosphatase receptor type F	GO:0099560	synapse adhesion between pre- and post-synapse (GO:0099560)	BP
GRIK2	female-amplifier	glutamate ionotropic receptor kainate type subunit 2	GO:1904315	transmitter-gated ion channel activity involved in regulation of postsynaptic membrane potential (GO:1904315)	BP
GRIK2	female-amplifier	glutamate ionotropic receptor kainate type subunit 2	GO:1904315	transmitter-gated ion channel activity involved in regulation of postsynaptic membrane potential (GO:1904315)	BP
DRD2	female-amplifier	dopamine receptor D2	GO:0099171	presynaptic modulation of chemical synaptic transmission (GO:0099171)	BP
DRD2	female-amplifier	dopamine receptor D2	GO:0099170	postsynaptic modulation of chemical synaptic transmission (GO:0099170)	BP
DRD2	female-amplifier	dopamine receptor D2	GO:0051580	regulation of neurotransmitter uptake (GO:0051580)	BP
DRD2	female-amplifier	dopamine receptor D2	GO:0099171	presynaptic modulation of chemical synaptic transmission (GO:0099171)	BP
GPC6	female-amplifier	glypican 6	GO:0098696	regulation of neurotransmitter receptor localization to postsynaptic specialization membrane (GO:0098696)	BP
ITGB1	female-amplifier	integrin subunit beta 1	GO:0050804	modulation of chemical synaptic transmission (GO:0050804)	BP
STXBP5	female-amplifier	syntaxin binding protein 5	GO:0010807	regulation of synaptic vesicle priming (GO:0010807)	BP
CACNG8	female-amplifier	calcium voltage-gated channel auxiliary subunit gamma 8	GO:0099072	regulation of postsynaptic membrane neurotransmitter receptor levels (GO:0099072)	BP
EGLN1	female-amplifier	egl-9 family hypoxia inducible factor 1	GO:0140252	regulation protein catabolic process at postsynapse (GO:0140252)	BP
EGLN1	female-amplifier	egl-9 family hypoxia inducible factor 1	GO:0099159	regulation of modification of postsynaptic structure (GO:0099159)	BP
VTI1A	female-amplifier	vesicle transport through interaction with t-SNAREs 1A	GO:0016189	synaptic vesicle to endosome fusion (GO:0016189)	BP
SEMA3F	female-amplifier	semaphorin 3F	GO:0099175	regulation of postsynapse organization (GO:0099175)	BP
PLEKHG5	female-amplifier	pleckstrin homology and RhoGEF domain containing G5	GO:0140251	regulation protein catabolic process at presynapse (GO:0140251)	BP
NRG3	female-amplifier	neuregulin 3	GO:0050804	modulation of chemical synaptic transmission (GO:0050804)	BP
ARHGEF7	female-amplifier	Rho guanine nucleotide exchange factor 7	GO:0099140	presynaptic actin cytoskeleton organization (GO:0099140)	BP
ARHGEF7	female-amplifier	Rho guanine nucleotide exchange factor 7	GO:0098974	postsynaptic actin cytoskeleton organization (GO:0098974)	BP
RAC1	female-amplifier	Rac family small GTPase 1	GO:0098974	postsynaptic actin cytoskeleton organization (GO:0098974)	BP
KIAA1688	female-amplifier	Rho GTPase activating protein 39	GO:0099173	postsynapse organization (GO:0099173)	BP
TRIO	female-amplifier	trio Rho guanine nucleotide exchange factor	GO:0099170	postsynaptic modulation of chemical synaptic transmission (GO:0099170)	BP
GPER	female-amplifier	G protein-coupled estrogen receptor 1	GO:0050804	modulation of chemical synaptic transmission (GO:0050804)	BP
AP2M1	female-amplifier	adaptor related protein complex 2 subunit mu 1	GO:0098884	postsynaptic neurotransmitter receptor endocytosis (GO:0098884)	BP
SIRT2	female-amplifier	sirtuin 2	GO:0099149	regulation of postsynaptic neurotransmitter receptor endocytosis (GO:0099149)	BP
ACTN1	female-amplifier	actinin alpha 1	GO:0099186	structural constituent of postsynapse (GO:0099186)	BP
CABP1	female-amplifier	calcium binding protein 1	GO:0098885	modification of postsynaptic actin cytoskeleton (GO:0098885)	BP
MYH10	female-amplifier	myosin heavy chain 10	GO:0098974	postsynaptic actin cytoskeleton organization (GO:0098974)	BP
PICK1	female-amplifier	protein interacting with PRKCA 1	GO:0099149	regulation of postsynaptic neurotransmitter receptor endocytosis (GO:0099149)	BP
USP46	female-amplifier	ubiquitin specific peptidase 46	GO:0099149	regulation of postsynaptic neurotransmitter receptor endocytosis (GO:0099149)	BP
STK38L	female-amplifier	serine/threonine kinase 38 like	GO:0099173	postsynapse organization (GO:0099173)	BP
ARHGEF15	female-amplifier	Rho guanine nucleotide exchange factor 15	GO:0150052	regulation of postsynapse assembly (GO:0150052)	BP
DACT1	female-amplifier	dishevelled binding antagonist of beta catenin 1	GO:0099175	regulation of postsynapse organization (GO:0099175)	BP
EEF2K	female-amplifier	eukaryotic elongation factor 2 kinase	GO:0140245	regulation of translation at postsynapse (GO:0140245)	BP
DACT1	female-amplifier	dishevelled binding antagonist of beta catenin 1	GO:0099175	regulation of postsynapse organization (GO:0099175)	BP
CTBP2	female-amplifier	C-terminal binding protein 2	GO:0098882	structural constituent of active zone (GO:0098882)	BP
RAPSN	female-amplifier	receptor associated protein of the synapse	GO:0099645	neurotransmitter receptor localization to postsynaptic specialization membrane (GO:0099645)	BP
RAPSN	female-amplifier	receptor associated protein of the synapse	GO:0098879	structural constituent of postsynaptic specialization (GO:0098879)	BP
AKT1	female-amplifier	AKT serine/threonine kinase 1	GO:0099175	regulation of postsynapse organization (GO:0099175)	BP
NRXN3	female-amplifier	neurexin 3	GO:0099645	neurotransmitter receptor localization to postsynaptic specialization membrane (GO:0099645)	BP
NRXN3	female-amplifier	neurexin 3	GO:0097107	postsynaptic density assembly (GO:0097107)	BP
HNRNPM	female-amplifier	heterogeneous nuclear ribonucleoprotein M	GO:0099175	regulation of postsynapse organization (GO:0099175)	BP
ITGB1	female-amplifier	integrin subunit beta 1	GO:0098880	maintenance of postsynaptic specialization structure (GO:0098880)	BP
ITGB1	female-amplifier	integrin subunit beta 1	GO:0150054	regulation of postsynaptic neurotransmitter receptor diffusion trapping (GO:0150054)	BP
PLXND1	female-amplifier	plexin D1	GO:0008039	synaptic target recognition (GO:0008039)	BP
ITGB1	female-amplifier	integrin subunit beta 1	GO:1905806	regulation of synapse disassembly (GO:1905806)	BP
RPL13	female-amplifier	ribosomal protein L13	GO:0140236	translation at presynapse (GO:0140236)	BP
RPL23A	female-amplifier	ribosomal protein L23a	GO:0140236	translation at presynapse (GO:0140236)	BP
RPL35	female-amplifier	ribosomal protein L35	GO:0140236	translation at presynapse (GO:0140236)	BP
RPL13	female-amplifier	ribosomal protein L13	GO:0140242	translation at postsynapse (GO:0140242)	BP
RPL23A	female-amplifier	ribosomal protein L23a	GO:0140242	translation at postsynapse (GO:0140242)	BP
RPL35	female-amplifier	ribosomal protein L35	GO:0140242	translation at postsynapse (GO:0140242)	BP
MAPK3	female-amplifier	mitogen-activated protein kinase 3	GO:0050804	modulation of chemical synaptic transmission (GO:0050804)	BP
RIMS1	female-amplifier	regulating synaptic membrane exocytosis 1	GO:0150037	regulation of calcium-dependent activation of synaptic vesicle fusion (GO:0150037)	BP
NRXN3	female-amplifier	neurexin 3	GO:0099072	regulation of postsynaptic membrane neurotransmitter receptor levels (GO:0099072)	BP
NRXN3	female-amplifier	neurexin 3	GO:0099537	trans-synaptic signaling (GO:0099537)	BP
NRXN3	female-amplifier	neurexin 3	GO:0099537	trans-synaptic signaling (GO:0099537)	BP
SYNGAP1	female-amplifier	synaptic Ras GTPase activating protein 1	GO:0050804	modulation of chemical synaptic transmission (GO:0050804)	BP
BAIAP2	female-amplifier	BAR/IMD domain containing adaptor protein 2	GO:0099175	regulation of postsynapse organization (GO:0099175)	BP
SPTBN2	female-amplifier	spectrin beta, non-erythrocytic 2	GO:0099150	regulation of postsynaptic specialization assembly (GO:0099150)	BP
NUMBL	female-amplifier	NUMB like endocytic adaptor protein	GO:0150052	regulation of postsynapse assembly (GO:0150052)	BP
CTTN	female-amplifier	cortactin	GO:0099010	modification of postsynaptic structure (GO:0099010)	BP
IQSEC1	female-amplifier	IQ motif and Sec7 domain ArfGEF 1	GO:0099170	postsynaptic modulation of chemical synaptic transmission (GO:0099170)	BP
RIMS1	female-amplifier	regulating synaptic membrane exocytosis 1	GO:0016082	synaptic vesicle priming (GO:0016082)	BP
BIN1	female-amplifier	bridging integrator 1	GO:0048488	synaptic vesicle endocytosis (GO:0048488)	BP
BIN1	female-amplifier	bridging integrator 1	GO:0048488	synaptic vesicle endocytosis (GO:0048488)	BP
IGF1R	female-amplifier	insulin like growth factor 1 receptor	GO:0099170	postsynaptic modulation of chemical synaptic transmission (GO:0099170)	BP
AGAP3	female-amplifier	ArfGAP with GTPase domain, ankyrin repeat and PH domain 3	GO:0099072	regulation of postsynaptic membrane neurotransmitter receptor levels (GO:0099072)	BP
PTK2B	female-amplifier	protein tyrosine kinase 2 beta	GO:0099170	postsynaptic modulation of chemical synaptic transmission (GO:0099170)	BP
PTK2B	female-amplifier	protein tyrosine kinase 2 beta	GO:0099151	regulation of postsynaptic density assembly (GO:0099151)	BP
TSC2	female-amplifier	TSC complex subunit 2	GO:0099175	regulation of postsynapse organization (GO:0099175)	BP
AP2M1	female-amplifier	adaptor related protein complex 2 subunit mu 1	GO:0048488	synaptic vesicle endocytosis (GO:0048488)	BP
TRIO	female-amplifier	trio Rho guanine nucleotide exchange factor	GO:0050804	modulation of chemical synaptic transmission (GO:0050804)	BP
RALA	female-amplifier	RAS like proto-oncogene A	GO:0099149	regulation of postsynaptic neurotransmitter receptor endocytosis (GO:0099149)	BP
RIMS1	female-amplifier	regulating synaptic membrane exocytosis 1	GO:0099525	presynaptic dense core vesicle exocytosis (GO:0099525)	BP
PTPN23	female-amplifier	protein tyrosine phosphatase non-receptor type 23	GO:0099161	regulation of presynaptic dense core vesicle exocytosis (GO:0099161)	BP
PRKCE	female-amplifier	protein kinase C epsilon	GO:0099161	regulation of presynaptic dense core vesicle exocytosis (GO:0099161)	BP
EVI5	female-amplifier	ecotropic viral integration site 5	GO:0099161	regulation of presynaptic dense core vesicle exocytosis (GO:0099161)	BP
TBC1D2	female-amplifier	TBC1 domain family member 2	GO:0099161	regulation of presynaptic dense core vesicle exocytosis (GO:0099161)	BP
NRXN2	female-amplifier	neurexin 2	GO:0098962	regulation of postsynaptic neurotransmitter receptor activity (GO:0098962)	BP
CTBP1	female-amplifier	C-terminal binding protein 1	GO:0048488	synaptic vesicle endocytosis (GO:0048488)	BP
CTBP1	female-amplifier	C-terminal binding protein 1	GO:0097091	synaptic vesicle clustering (GO:0097091)	BP
CD2AP	female-amplifier	CD2 associated protein	GO:0050808	synapse organization (GO:0050808)	BP
NRG3	female-amplifier	neuregulin 3	GO:0007416	synapse assembly (GO:0007416)	BP
PPFIA1	female-amplifier	PTPRF interacting protein alpha 1	GO:0099072	regulation of postsynaptic membrane neurotransmitter receptor levels (GO:0099072)	BP
CNTNAP1	female-amplifier	contactin associated protein 1	GO:0090128	regulation of synapse maturation (GO:0090128)	BP
ATP6V1B2	female-amplifier	ATPase H+ transporting V1 subunit B2	GO:0097401	synaptic vesicle proton loading (GO:0097401)	BP
ATP6V0D1	female-amplifier	ATPase H+ transporting V0 subunit d1	GO:0097401	synaptic vesicle proton loading (GO:0097401)	BP
ATP6V1H	female-amplifier	ATPase H+ transporting V1 subunit H	GO:0097401	synaptic vesicle proton loading (GO:0097401)	BP
ATP6V1B1	female-amplifier	ATPase H+ transporting V1 subunit B1	GO:0097401	synaptic vesicle proton loading (GO:0097401)	BP
GRID2IP	female-amplifier	Grid2 interacting protein	GO:0099072	regulation of postsynaptic membrane neurotransmitter receptor levels (GO:0099072)	BP
GRID2IP	female-amplifier	Grid2 interacting protein	GO:0099566	regulation of postsynaptic cytosolic calcium levels (GO:0099566)	BP
AAK1	female-amplifier	AP2 associated kinase 1	GO:0140238	presynaptic endocytosis (GO:0140238)	BP
AAK1	female-amplifier	AP2 associated kinase 1	GO:0140238	presynaptic endocytosis (GO:0140238)	BP
KCNC3	female-amplifier	potassium voltage-gated channel subfamily C member 3	GO:1900242	regulation of synaptic vesicle endocytosis (GO:1900242)	BP
CD44	female-amplifier	CD44 molecule (Indian blood group)	GO:0099173	postsynapse organization (GO:0099173)	BP
CD44	female-amplifier	CD44 molecule (Indian blood group)	GO:0099159	regulation of modification of postsynaptic structure (GO:0099159)	BP
KCNK2	female-amplifier	potassium two pore domain channel subfamily K member 2	GO:0099565	postsynaptic process involved in chemical synaptic transmission (GO:0099565)	BP
GLRA2	female-amplifier	glycine receptor alpha 2	GO:0050804	modulation of chemical synaptic transmission (GO:0050804)	BP
KCNK1	female-amplifier	potassium two pore domain channel subfamily K member 1	GO:1905030	voltage-gated ion channel activity involved in regulation of postsynaptic membrane potential (GO:1905030)	BP
PRMT8	female-amplifier	protein arginine methyltransferase 8	GO:1905274	regulation of modification of postsynaptic actin cytoskeleton (GO:1905274)	BP
ODZ4	female-amplifier	teneurin transmembrane protein 4	GO:0099560	synapse adhesion between pre- and post-synapse (GO:0099560)	BP
IGSF8	female-amplifier	immunoglobulin superfamily member 8	GO:0050804	modulation of chemical synaptic transmission (GO:0050804)	BP
STX7	female-amplifier	syntaxin 7	GO:0016189	synaptic vesicle to endosome fusion (GO:0016189)	BP
NOTCH1	female-amplifier	notch receptor 1	GO:0099565	postsynaptic process involved in chemical synaptic transmission (GO:0099565)	BP
MYLK	female-amplifier	myosin light chain kinase	GO:1900242	regulation of synaptic vesicle endocytosis (GO:1900242)	BP
MYLK	female-amplifier	myosin light chain kinase	GO:0098969	neurotransmitter receptor transport to postsynaptic membrane (GO:0098969)	BP
CAPN2	female-amplifier	calpain 2	GO:0140249	protein catabolic process at postsynapse (GO:0140249)	BP
CAPN2	female-amplifier	calpain 2	GO:0048488	synaptic vesicle endocytosis (GO:0048488)	BP
SGIP1	female-amplifier	SH3GL interacting endocytic adaptor 1	GO:0048488	synaptic vesicle endocytosis (GO:0048488)	BP
AGAP1	female-amplifier	ArfGAP with GTPase domain, ankyrin repeat and PH domain 1	GO:0099159	regulation of modification of postsynaptic structure (GO:0099159)	BP
ANK3	female-amplifier	ankyrin 3	GO:0099159	regulation of modification of postsynaptic structure (GO:0099159)	BP
PRICKLE2	female-amplifier	prickle planar cell polarity protein 2	GO:0099151	regulation of postsynaptic density assembly (GO:0099151)	BP
PRICKLE2	female-amplifier	prickle planar cell polarity protein 2	GO:0099562	maintenance of postsynaptic density structure (GO:0099562)	BP
PRICKLE2	female-amplifier	prickle planar cell polarity protein 2	GO:0099151	regulation of postsynaptic density assembly (GO:0099151)	BP
RAB17	female-amplifier	RAB17, member RAS oncogene family	GO:0098937	anterograde dendritic transport (GO:0098937)	BP
CAMK2G	female-amplifier	calcium/calmodulin dependent protein kinase II gamma	GO:0099072	regulation of postsynaptic membrane neurotransmitter receptor levels (GO:0099072)	BP
ATG7	female-amplifier	autophagy related 7	GO:0099504	synaptic vesicle cycle (GO:0099504)	BP
EFR3A	female-amplifier	EFR3 homolog A	GO:0016082	synaptic vesicle priming (GO:0016082)	BP
AP2A2	female-amplifier	adaptor related protein complex 2 subunit alpha 2	GO:0048488	synaptic vesicle endocytosis (GO:0048488)	BP
CRTAC1	female-amplifier	cartilage acidic protein 1	GO:0051963	regulation of synapse assembly (GO:0051963)	BP
LNX1	female-amplifier	ligand of numb-protein X 1	GO:0060074	synapse maturation (GO:0060074)	BP
NRXN3	female-amplifier	neurexin 3	GO:0099550	trans-synaptic signaling, modulating synaptic transmission (GO:0099550)	BP
NRXN2	female-amplifier	neurexin 2	GO:0150052	regulation of postsynapse assembly (GO:0150052)	BP
NRXN2	female-amplifier	neurexin 2	GO:0099171	presynaptic modulation of chemical synaptic transmission (GO:0099171)	BP
LRP8	female-amplifier	LDL receptor related protein 8	GO:0098962	regulation of postsynaptic neurotransmitter receptor activity (GO:0098962)	BP
NOTCH1	female-amplifier	notch receptor 1	GO:0098962	regulation of postsynaptic neurotransmitter receptor activity (GO:0098962)	BP
INPP4A	female-amplifier	inositol polyphosphate-4-phosphatase type I A	GO:0099072	regulation of postsynaptic membrane neurotransmitter receptor levels (GO:0099072)	BP
LRP1	female-amplifier	LDL receptor related protein 1	GO:0099149	regulation of postsynaptic neurotransmitter receptor endocytosis (GO:0099149)	BP
ASAM	female-amplifier	CXADR like membrane protein	GO:0099170	postsynaptic modulation of chemical synaptic transmission (GO:0099170)	BP
EIF2C2	female-amplifier	argonaute RISC catalytic component 2	GO:0090128	regulation of synapse maturation (GO:0090128)	BP
ENAH	female-amplifier	ENAH actin regulator	GO:0099188	postsynaptic cytoskeleton organization (GO:0099188)	BP
MKLN1	female-amplifier	muskelin 1	GO:0098968	neurotransmitter receptor transport postsynaptic membrane to endosome (GO:0098968)	BP
UBE2I	female-amplifier	ubiquitin conjugating enzyme E2 I	GO:0050804	modulation of chemical synaptic transmission (GO:0050804)	BP
PDLIM4	female-amplifier	PDZ and LIM domain 4	GO:0099072	regulation of postsynaptic membrane neurotransmitter receptor levels (GO:0099072)	BP
PDLIM5	female-amplifier	PDZ and LIM domain 5	GO:0150052	regulation of postsynapse assembly (GO:0150052)	BP
SLC4A8	female-amplifier	solute carrier family 4 member 8	GO:2000300	regulation of synaptic vesicle exocytosis (GO:2000300)	BP
KIF21B	female-amplifier	kinesin family member 21B	GO:0098934	retrograde dendritic transport (GO:0098934)	BP
KIF21B	female-amplifier	kinesin family member 21B	GO:0099072	regulation of postsynaptic membrane neurotransmitter receptor levels (GO:0099072)	BP
DOCK1	female-amplifier	dedicator of cytokinesis 1	GO:0150052	regulation of postsynapse assembly (GO:0150052)	BP
DOCK4	female-amplifier	dedicator of cytokinesis 4	GO:0150052	regulation of postsynapse assembly (GO:0150052)	BP
SEPT9	female-amplifier	septin 9	GO:0098971	anterograde dendritic transport of neurotransmitter receptor complex (GO:0098971)	BP
RNF220	female-amplifier	ring finger protein 220	GO:0099149	regulation of postsynaptic neurotransmitter receptor endocytosis (GO:0099149)	BP
MIB2	female-amplifier	MIB E3 ubiquitin protein ligase 2	GO:0140252	regulation protein catabolic process at postsynapse (GO:0140252)	BP
MIB2	female-amplifier	MIB E3 ubiquitin protein ligase 2	GO:0099149	regulation of postsynaptic neurotransmitter receptor endocytosis (GO:0099149)	BP
SRGAP3	female-amplifier	SLIT-ROBO Rho GTPase activating protein 3	GO:0150052	regulation of postsynapse assembly (GO:0150052)	BP
RAC1	female-amplifier	Rac family small GTPase 1	GO:0150052	regulation of postsynapse assembly (GO:0150052)	BP
PCDH7	female-amplifier	protocadherin 7	GO:0150052	regulation of postsynapse assembly (GO:0150052)	BP
OSBPL2	female-amplifier	oxysterol binding protein like 2	GO:0010807	regulation of synaptic vesicle priming (GO:0010807)	BP
OSBPL2	female-amplifier	oxysterol binding protein like 2	GO:0099509	regulation of presynaptic cytosolic calcium levels (GO:0099509)	BP
UBE2N	female-amplifier	ubiquitin conjugating enzyme E2 N	GO:0140252	regulation protein catabolic process at postsynapse (GO:0140252)	BP
RAC1	female-amplifier	Rac family small GTPase 1	GO:1900242	regulation of synaptic vesicle endocytosis (GO:1900242)	BP
MKL2	female-amplifier	myocardin related transcription factor B	GO:0099159	regulation of modification of postsynaptic structure (GO:0099159)	BP
TANC2	female-amplifier	tetratricopeptide repeat, ankyrin repeat and coiled-coil containing 2	GO:0098919	structural constituent of postsynaptic density (GO:0098919)	BP
CLASP2	female-amplifier	cytoplasmic linker associated protein 2	GO:0099187	presynaptic cytoskeleton organization (GO:0099187)	BP
RAPGEF2	female-amplifier	Rap guanine nucleotide exchange factor 2	GO:0099159	regulation of modification of postsynaptic structure (GO:0099159)	BP
ACCN1	female-amplifier	acid sensing ion channel subunit 2	GO:0150052	regulation of postsynapse assembly (GO:0150052)	BP
AP2A2	female-amplifier	adaptor related protein complex 2 subunit alpha 2	GO:0048488	synaptic vesicle endocytosis (GO:0048488)	BP
CLTA	female-amplifier	clathrin light chain A	GO:0048488	synaptic vesicle endocytosis (GO:0048488)	BP
SYNJ2	female-amplifier	synaptojanin 2	GO:0048488	synaptic vesicle endocytosis (GO:0048488)	BP
ATP8A1	female-amplifier	ATPase phospholipid transporting 8A1	GO:0048488	synaptic vesicle endocytosis (GO:0048488)	BP
MINK1	female-amplifier	misshapen like kinase 1	GO:0099175	regulation of postsynapse organization (GO:0099175)	BP
KCNC3	female-amplifier	potassium voltage-gated channel subfamily C member 3	GO:0099055	integral component of postsynaptic membrane (GO:0099055)	CC
KCNC3	female-amplifier	potassium voltage-gated channel subfamily C member 3	GO:0099056	integral component of presynaptic membrane (GO:0099056)	CC
NPTN	female-amplifier	neuroplastin	GO:0099061	integral component of postsynaptic density membrane (GO:0099061)	CC
NPTN	female-amplifier	neuroplastin	GO:0099059	integral component of presynaptic active zone membrane (GO:0099059)	CC
NPTN	female-amplifier	neuroplastin	GO:0097060	synaptic membrane (GO:0097060)	CC
NAPA	female-amplifier	NSF attachment protein alpha	GO:0048787	presynaptic active zone membrane (GO:0048787)	CC
RIMS1	female-amplifier	regulating synaptic membrane exocytosis 1	GO:0098831	presynaptic active zone cytoplasmic component (GO:0098831)	CC
PRKCA	female-amplifier	protein kinase C alpha	GO:0099523	presynaptic cytosol (GO:0099523)	CC
RIMS1	female-amplifier	regulating synaptic membrane exocytosis 1	GO:0098831	presynaptic active zone cytoplasmic component (GO:0098831)	CC
CTBP2	female-amplifier	C-terminal binding protein 2	GO:0099523	presynaptic cytosol (GO:0099523)	CC
CTBP2	female-amplifier	C-terminal binding protein 2	GO:0098831	presynaptic active zone cytoplasmic component (GO:0098831)	CC
RIMS3	female-amplifier	regulating synaptic membrane exocytosis 3	GO:0099524	postsynaptic cytosol (GO:0099524)	CC
PLD1	female-amplifier	phospholipase D1	GO:0045202	synapse (GO:0045202)	CC
ATP2B2	female-amplifier	ATPase plasma membrane Ca2+ transporting 2	GO:0099061	integral component of postsynaptic density membrane (GO:0099061)	CC
ATP2B2	female-amplifier	ATPase plasma membrane Ca2+ transporting 2	GO:0099055	integral component of postsynaptic membrane (GO:0099055)	CC
ATP2B2	female-amplifier	ATPase plasma membrane Ca2+ transporting 2	GO:0099059	integral component of presynaptic active zone membrane (GO:0099059)	CC
RIMS1	female-amplifier	regulating synaptic membrane exocytosis 1	GO:0098831	presynaptic active zone cytoplasmic component (GO:0098831)	CC
PRKCE	female-amplifier	protein kinase C epsilon	GO:0099523	presynaptic cytosol (GO:0099523)	CC
CABP1	female-amplifier	calcium binding protein 1	GO:0099092	postsynaptic density, intracellular component (GO:0099092)	CC
PRKCZ	female-amplifier	protein kinase C zeta	GO:0014069	postsynaptic density (GO:0014069)	CC
CTTN	female-amplifier	cortactin	GO:0098871	postsynaptic actin cytoskeleton (GO:0098871)	CC
KCNJ9	female-amplifier	potassium inwardly rectifying channel subfamily J member 9	GO:0099056	integral component of presynaptic membrane (GO:0099056)	CC
PHB	female-amplifier	prohibitin 1	GO:0098891	extrinsic component of presynaptic active zone membrane (GO:0098891)	CC
PHB	female-amplifier	prohibitin 1	GO:0014069	postsynaptic density (GO:0014069)	CC
CACNB4	female-amplifier	calcium voltage-gated channel auxiliary subunit beta 4	GO:0098793	presynapse (GO:0098793)	CC
BAIAP2	female-amplifier	BAR/IMD domain containing adaptor protein 2	GO:0099524	postsynaptic cytosol (GO:0099524)	CC
BAIAP2	female-amplifier	BAR/IMD domain containing adaptor protein 2	GO:0099523	presynaptic cytosol (GO:0099523)	CC
CACNB1	female-amplifier	calcium voltage-gated channel auxiliary subunit beta 1	GO:0098793	presynapse (GO:0098793)	CC
CTBP1	female-amplifier	C-terminal binding protein 1	GO:0098831	presynaptic active zone cytoplasmic component (GO:0098831)	CC
CTBP2	female-amplifier	C-terminal binding protein 2	GO:0098831	presynaptic active zone cytoplasmic component (GO:0098831)	CC
CACNA1C	female-amplifier	calcium voltage-gated channel subunit alpha1 C	GO:0099055	integral component of postsynaptic membrane (GO:0099055)	CC
EFNB2	female-amplifier	ephrin B2	GO:0099056	integral component of presynaptic membrane (GO:0099056)	CC
EFNB2	female-amplifier	ephrin B2	GO:0099061	integral component of postsynaptic density membrane (GO:0099061)	CC
BACE1	female-amplifier	beta-secretase 1	GO:0098793	presynapse (GO:0098793)	CC
CYFIP1	female-amplifier	cytoplasmic FMR1 interacting protein 1	GO:0098794	postsynapse (GO:0098794)	CC
PRKAR1B	female-amplifier	protein kinase cAMP-dependent type I regulatory subunit beta	GO:0045202	synapse (GO:0045202)	CC
AGRN	female-amplifier	agrin	GO:0098965	extracellular matrix of synaptic cleft (GO:0098965)	CC
AGRN	female-amplifier	agrin	GO:0045202	synapse (GO:0045202)	CC
PAK1	female-amplifier	p21 (RAC1) activated kinase 1	GO:0014069	postsynaptic density (GO:0014069)	CC
PAK2	female-amplifier	p21 (RAC1) activated kinase 2	GO:0014069	postsynaptic density (GO:0014069)	CC
TRIM3	female-amplifier	tripartite motif containing 3	GO:0098794	postsynapse (GO:0098794)	CC
SYNGAP1	female-amplifier	synaptic Ras GTPase activating protein 1	GO:0099092	postsynaptic density, intracellular component (GO:0099092)	CC
SHANK2	female-amplifier	SH3 and multiple ankyrin repeat domains 2	GO:0014069	postsynaptic density (GO:0014069)	CC
HTT	female-amplifier	huntingtin	GO:0099523	presynaptic cytosol (GO:0099523)	CC
HTT	female-amplifier	huntingtin	GO:0099524	postsynaptic cytosol (GO:0099524)	CC
SCN8A	female-amplifier	sodium voltage-gated channel alpha subunit 8	GO:0099059	integral component of presynaptic active zone membrane (GO:0099059)	CC
SCN8A	female-amplifier	sodium voltage-gated channel alpha subunit 8	GO:0099061	integral component of postsynaptic density membrane (GO:0099061)	CC
BAIAP2	female-amplifier	BAR/IMD domain containing adaptor protein 2	GO:0099092	postsynaptic density, intracellular component (GO:0099092)	CC
EIF4E	female-amplifier	eukaryotic translation initiation factor 4E	GO:0098794	postsynapse (GO:0098794)	CC
EEF1D	female-amplifier	eukaryotic translation elongation factor 1 delta	GO:0045202	synapse (GO:0045202)	CC
RPS18	female-amplifier	ribosomal protein S18	GO:0045202	synapse (GO:0045202)	CC
RPS20	female-amplifier	ribosomal protein S20	GO:0045202	synapse (GO:0045202)	CC
BIN1	female-amplifier	bridging integrator 1	GO:0045202	synapse (GO:0045202)	CC
KPNA1	female-amplifier	karyopherin subunit alpha 1	GO:0014069	postsynaptic density (GO:0014069)	CC
NAPA	female-amplifier	NSF attachment protein alpha	GO:0098793	presynapse (GO:0098793)	CC
NAPA	female-amplifier	NSF attachment protein alpha	GO:0098794	postsynapse (GO:0098794)	CC
FXYD6	female-amplifier	FXYD domain containing ion transport regulator 6	GO:0099056	integral component of presynaptic membrane (GO:0099056)	CC
FXYD6	female-amplifier	FXYD domain containing ion transport regulator 6	GO:0099055	integral component of postsynaptic membrane (GO:0099055)	CC
SLC6A9	female-amplifier	solute carrier family 6 member 9	GO:0099055	integral component of postsynaptic membrane (GO:0099055)	CC
SLC6A9	female-amplifier	solute carrier family 6 member 9	GO:0030285	integral component of synaptic vesicle membrane (GO:0030285)	CC
SYNJ2	female-amplifier	synaptojanin 2	GO:0098793	presynapse (GO:0098793)	CC
ANKS1B	female-amplifier	ankyrin repeat and sterile alpha motif domain containing 1B	GO:0014069	postsynaptic density (GO:0014069)	CC
ANKS1B	female-amplifier	ankyrin repeat and sterile alpha motif domain containing 1B	GO:0099523	presynaptic cytosol (GO:0099523)	CC
SLC1A7	female-amplifier	solute carrier family 1 member 7	GO:0099055	integral component of postsynaptic membrane (GO:0099055)	CC
SLC1A7	female-amplifier	solute carrier family 1 member 7	GO:0099056	integral component of presynaptic membrane (GO:0099056)	CC
CACNA1C	female-amplifier	calcium voltage-gated channel subunit alpha1 C	GO:0099056	integral component of presynaptic membrane (GO:0099056)	CC
SLC6A6	female-amplifier	solute carrier family 6 member 6	GO:0099055	integral component of postsynaptic membrane (GO:0099055)	CC
STAT3	female-amplifier	signal transducer and activator of transcription 3	GO:0014069	postsynaptic density (GO:0014069)	CC
APBB1	female-amplifier	amyloid beta precursor protein binding family B member 1	GO:0098793	presynapse (GO:0098793)	CC
CNTNAP1	female-amplifier	contactin associated protein 1	GO:0048786	presynaptic active zone (GO:0048786)	CC
DOCK1	female-amplifier	dedicator of cytokinesis 1	GO:0098793	presynapse (GO:0098793)	CC
TSC2	female-amplifier	TSC complex subunit 2	GO:0045202	synapse (GO:0045202)	CC
PLCB4	female-amplifier	phospholipase C beta 4	GO:0014069	postsynaptic density (GO:0014069)	CC
PLCB4	female-amplifier	phospholipase C beta 4	SYNGO:postsyn_ser	postsynaptic SER	CC
CTBP1	female-amplifier	C-terminal binding protein 1	GO:0098831	presynaptic active zone cytoplasmic component (GO:0098831)	CC
PPFIA4	female-amplifier	PTPRF interacting protein alpha 4	GO:0045202	synapse (GO:0045202)	CC
PPFIBP2	female-amplifier	PPFIA binding protein 2	GO:0098793	presynapse (GO:0098793)	CC
ODZ2	female-amplifier	teneurin transmembrane protein 2	GO:0098890	extrinsic component of postsynaptic membrane (GO:0098890)	CC
CNTN1	female-amplifier	contactin 1	GO:0099026	anchored component of presynaptic membrane (GO:0099026)	CC
CNTN1	female-amplifier	contactin 1	GO:0099025	anchored component of postsynaptic membrane (GO:0099025)	CC
ATP8A1	female-amplifier	ATPase phospholipid transporting 8A1	GO:0030285	integral component of synaptic vesicle membrane (GO:0030285)	CC
CTTN	female-amplifier	cortactin	GO:0098871	postsynaptic actin cytoskeleton (GO:0098871)	CC
EGLN1	female-amplifier	egl-9 family hypoxia inducible factor 1	GO:0014069	postsynaptic density (GO:0014069)	CC
APP	female-amplifier	amyloid beta precursor protein	GO:0048786	presynaptic active zone (GO:0048786)	CC
IQSEC1	female-amplifier	IQ motif and Sec7 domain ArfGEF 1	GO:0099092	postsynaptic density, intracellular component (GO:0099092)	CC
CDH23	female-amplifier	cadherin related 23	GO:0045202	synapse (GO:0045202)	CC
PPP3CA	female-amplifier	protein phosphatase 3 catalytic subunit alpha	GO:0045202	synapse (GO:0045202)	CC
CDH8	female-amplifier	cadherin 8	GO:0097060	synaptic membrane (GO:0097060)	CC
SLC6A9	female-amplifier	solute carrier family 6 member 9	GO:0014069	postsynaptic density (GO:0014069)	CC
SLC6A9	female-amplifier	solute carrier family 6 member 9	GO:0099056	integral component of presynaptic membrane (GO:0099056)	CC
MAPK1	female-amplifier	mitogen-activated protein kinase 1	GO:0014069	postsynaptic density (GO:0014069)	CC
STXBP5	female-amplifier	syntaxin binding protein 5	GO:0099523	presynaptic cytosol (GO:0099523)	CC
SPTBN2	female-amplifier	spectrin beta, non-erythrocytic 2	GO:0098793	presynapse (GO:0098793)	CC
STXBP5	female-amplifier	syntaxin binding protein 5	GO:0098888	extrinsic component of presynaptic membrane (GO:0098888)	CC
SNAP47	female-amplifier	synaptosome associated protein 47	GO:0048786	presynaptic active zone (GO:0048786)	CC
PTPRN2	female-amplifier	protein tyrosine phosphatase receptor type N2	GO:0030285	integral component of synaptic vesicle membrane (GO:0030285)	CC
STX7	female-amplifier	syntaxin 7	GO:0030285	integral component of synaptic vesicle membrane (GO:0030285)	CC
STXBP5	female-amplifier	syntaxin binding protein 5	GO:0008021	synaptic vesicle (GO:0008021)	CC
STXBP5	female-amplifier	syntaxin binding protein 5	GO:0098674	extrinsic component of neuronal dense core vesicle membrane (GO:0098674)	CC
NELF	female-amplifier	NMDA receptor synaptonuclear signaling and neuronal migration factor	GO:0098794	postsynapse (GO:0098794)	CC
ANKS1B	female-amplifier	ankyrin repeat and sterile alpha motif domain containing 1B	GO:0099092	postsynaptic density, intracellular component (GO:0099092)	CC
CPEB4	female-amplifier	cytoplasmic polyadenylation element binding protein 4	GO:0098794	postsynapse (GO:0098794)	CC
EIF4E	female-amplifier	eukaryotic translation initiation factor 4E	GO:0098794	postsynapse (GO:0098794)	CC
PAK1	female-amplifier	p21 (RAC1) activated kinase 1	GO:0098794	postsynapse (GO:0098794)	CC
STXBP5	female-amplifier	syntaxin binding protein 5	GO:0098674	extrinsic component of neuronal dense core vesicle membrane (GO:0098674)	CC
STXBP5	female-amplifier	syntaxin binding protein 5	GO:0098793	presynapse (GO:0098793)	CC
STXBP5	female-amplifier	syntaxin binding protein 5	GO:0098793	presynapse (GO:0098793)	CC
SPTBN2	female-amplifier	spectrin beta, non-erythrocytic 2	GO:0099189	postsynaptic spectrin-associated cytoskeleton (GO:0099189)	CC
GUCY1B3	female-amplifier	guanylate cyclase 1 soluble subunit beta 1	GO:0098831	presynaptic active zone cytoplasmic component (GO:0098831)	CC
SPTBN1	female-amplifier	spectrin beta, non-erythrocytic 1	GO:0098794	postsynapse (GO:0098794)	CC
BIN1	female-amplifier	bridging integrator 1	GO:0098850	extrinsic component of synaptic vesicle membrane (GO:0098850)	CC
KCNJ11	female-amplifier	potassium inwardly rectifying channel subfamily J member 11	GO:0099056	integral component of presynaptic membrane (GO:0099056)	CC
GRM4	female-amplifier	glutamate metabotropic receptor 4	GO:0099059	integral component of presynaptic active zone membrane (GO:0099059)	CC
EIF4G1	female-amplifier	eukaryotic translation initiation factor 4 gamma 1	GO:0098794	postsynapse (GO:0098794)	CC
CLU	female-amplifier	clusterin	GO:0045202	synapse (GO:0045202)	CC
KALRN	female-amplifier	kalirin RhoGEF kinase	GO:0098793	presynapse (GO:0098793)	CC
SNAP47	female-amplifier	synaptosome associated protein 47	GO:0014069	postsynaptic density (GO:0014069)	CC
PICALM	female-amplifier	phosphatidylinositol binding clathrin assembly protein	GO:0098894	extrinsic component of presynaptic endocytic zone membrane (GO:0098894)	CC
FYN	female-amplifier	FYN proto-oncogene, Src family tyrosine kinase	GO:0099092	postsynaptic density, intracellular component (GO:0099092)	CC
DGKQ	female-amplifier	diacylglycerol kinase theta	GO:0098793	presynapse (GO:0098793)	CC
DGKQ	female-amplifier	diacylglycerol kinase theta	GO:0098794	postsynapse (GO:0098794)	CC
EHD1	female-amplifier	EH domain containing 1	GO:0098793	presynapse (GO:0098793)	CC
FARP1	female-amplifier	FERM, ARH/RhoGEF and pleckstrin domain protein 1	GO:0098890	extrinsic component of postsynaptic membrane (GO:0098890)	CC
SIPA1L1	female-amplifier	signal induced proliferation associated 1 like 1	GO:0098794	postsynapse (GO:0098794)	CC
CLTA	female-amplifier	clathrin light chain A	GO:0098835	presynaptic endocytic zone membrane (GO:0098835)	CC
GUCY1B3	female-amplifier	guanylate cyclase 1 soluble subunit beta 1	GO:0098831	presynaptic active zone cytoplasmic component (GO:0098831)	CC
RPS18	female-amplifier	ribosomal protein S18	GO:0014069	postsynaptic density (GO:0014069)	CC
PPP2CA	female-amplifier	protein phosphatase 2 catalytic subunit alpha	GO:0045202	synapse (GO:0045202)	CC
GPC6	female-amplifier	glypican 6	GO:0045202	synapse (GO:0045202)	CC
EIF4E	female-amplifier	eukaryotic translation initiation factor 4E	GO:0099524	postsynaptic cytosol (GO:0099524)	CC
CHRNA3	female-amplifier	cholinergic receptor nicotinic alpha 3 subunit	GO:0099060	integral component of postsynaptic specialization membrane (GO:0099060)	CC
CHRNA3	female-amplifier	cholinergic receptor nicotinic alpha 3 subunit	GO:0099060	integral component of postsynaptic specialization membrane (GO:0099060)	CC
PICALM	female-amplifier	phosphatidylinositol binding clathrin assembly protein	GO:0098794	postsynapse (GO:0098794)	CC
CHRNB1	female-amplifier	cholinergic receptor nicotinic beta 1 subunit	GO:0099060	integral component of postsynaptic specialization membrane (GO:0099060)	CC
CHRNE	female-amplifier	cholinergic receptor nicotinic epsilon subunit	GO:0099060	integral component of postsynaptic specialization membrane (GO:0099060)	CC
CHRNE	female-amplifier	cholinergic receptor nicotinic epsilon subunit	GO:0099060	integral component of postsynaptic specialization membrane (GO:0099060)	CC
CACNG8	female-amplifier	calcium voltage-gated channel auxiliary subunit gamma 8	GO:0099061	integral component of postsynaptic density membrane (GO:0099061)	CC
CLTA	female-amplifier	clathrin light chain A	GO:0030672	synaptic vesicle membrane (GO:0030672)	CC
D4S234E	female-amplifier	neuronal vesicle trafficking associated 1	GO:0098845	postsynaptic endosome (GO:0098845)	CC
RAPSN	female-amplifier	receptor associated protein of the synapse	GO:0099634	postsynaptic specialization membrane (GO:0099634)	CC
PTK2B	female-amplifier	protein tyrosine kinase 2 beta	GO:0098794	postsynapse (GO:0098794)	CC
RAC1	female-amplifier	Rac family small GTPase 1	GO:0098794	postsynapse (GO:0098794)	CC
RAC1	female-amplifier	Rac family small GTPase 1	GO:0098794	postsynapse (GO:0098794)	CC
ITGB1	female-amplifier	integrin subunit beta 1	GO:0099055	integral component of postsynaptic membrane (GO:0099055)	CC
PRRT1	female-amplifier	proline rich transmembrane protein 1	GO:0099055	integral component of postsynaptic membrane (GO:0099055)	CC
ABR	female-amplifier	ABR activator of RhoGEF and GTPase	GO:0099092	postsynaptic density, intracellular component (GO:0099092)	CC
BCR	female-amplifier	BCR activator of RhoGEF and GTPase	GO:0099092	postsynaptic density, intracellular component (GO:0099092)	CC
SYNE1	female-amplifier	spectrin repeat containing nuclear envelope protein 1	GO:0098843	postsynaptic endocytic zone (GO:0098843)	CC
ITGB5	female-amplifier	integrin subunit beta 5	GO:0099699	integral component of synaptic membrane (GO:0099699)	CC
ITGB1	female-amplifier	integrin subunit beta 1	GO:0099699	integral component of synaptic membrane (GO:0099699)	CC
KALRN	female-amplifier	kalirin RhoGEF kinase	GO:0014069	postsynaptic density (GO:0014069)	CC
PTPRF	female-amplifier	protein tyrosine phosphatase receptor type F	GO:0099061	integral component of postsynaptic density membrane (GO:0099061)	CC
TANC1	female-amplifier	tetratricopeptide repeat, ankyrin repeat and coiled-coil containing 1	GO:0099092	postsynaptic density, intracellular component (GO:0099092)	CC
TANC2	female-amplifier	tetratricopeptide repeat, ankyrin repeat and coiled-coil containing 2	GO:0099092	postsynaptic density, intracellular component (GO:0099092)	CC
PRR7	female-amplifier	proline rich 7, synaptic	GO:0099092	postsynaptic density, intracellular component (GO:0099092)	CC
CACNB1	female-amplifier	calcium voltage-gated channel auxiliary subunit beta 1	GO:0098794	postsynapse (GO:0098794)	CC
CAPZB	female-amplifier	capping actin protein of muscle Z-line subunit beta	GO:0014069	postsynaptic density (GO:0014069)	CC
CDH13	female-amplifier	cadherin 13	GO:0045202	synapse (GO:0045202)	CC
GAPDH	female-amplifier	glyceraldehyde-3-phosphate dehydrogenase	GO:0099092	postsynaptic density, intracellular component (GO:0099092)	CC
GAPDH	female-amplifier	glyceraldehyde-3-phosphate dehydrogenase	GO:0098850	extrinsic component of synaptic vesicle membrane (GO:0098850)	CC
ARFGAP1	female-amplifier	ADP ribosylation factor GTPase activating protein 1	GO:0045202	synapse (GO:0045202)	CC
TSC2	female-amplifier	TSC complex subunit 2	GO:0014069	postsynaptic density (GO:0014069)	CC
AAK1	female-amplifier	AP2 associated kinase 1	GO:0098793	presynapse (GO:0098793)	CC
DRD2	female-amplifier	dopamine receptor D2	GO:0099055	integral component of postsynaptic membrane (GO:0099055)	CC
DRD2	female-amplifier	dopamine receptor D2	GO:0099056	integral component of presynaptic membrane (GO:0099056)	CC
DRD2	female-amplifier	dopamine receptor D2	GO:0099055	integral component of postsynaptic membrane (GO:0099055)	CC
DRD2	female-amplifier	dopamine receptor D2	GO:0099056	integral component of presynaptic membrane (GO:0099056)	CC
PPP1CA	female-amplifier	protein phosphatase 1 catalytic subunit alpha	GO:0098793	presynapse (GO:0098793)	CC
PPP1CA	female-amplifier	protein phosphatase 1 catalytic subunit alpha	GO:0098794	postsynapse (GO:0098794)	CC
CACNG8	female-amplifier	calcium voltage-gated channel auxiliary subunit gamma 8	GO:0099061	integral component of postsynaptic density membrane (GO:0099061)	CC
KIAA1688	female-amplifier	Rho GTPase activating protein 39	GO:0098794	postsynapse (GO:0098794)	CC
GPER	female-amplifier	G protein-coupled estrogen receptor 1	GO:0099055	integral component of postsynaptic membrane (GO:0099055)	CC
GPER	female-amplifier	G protein-coupled estrogen receptor 1	GO:0099056	integral component of presynaptic membrane (GO:0099056)	CC
TRIO	female-amplifier	trio Rho guanine nucleotide exchange factor	GO:0098794	postsynapse (GO:0098794)	CC
USP46	female-amplifier	ubiquitin specific peptidase 46	GO:0045202	synapse (GO:0045202)	CC
CLTA	female-amplifier	clathrin light chain A	GO:0098843	postsynaptic endocytic zone (GO:0098843)	CC
MYH10	female-amplifier	myosin heavy chain 10	GO:0098871	postsynaptic actin cytoskeleton (GO:0098871)	CC
SGIP1	female-amplifier	SH3GL interacting endocytic adaptor 1	GO:0098793	presynapse (GO:0098793)	CC
SYNE1	female-amplifier	spectrin repeat containing nuclear envelope protein 1	GO:0098871	postsynaptic actin cytoskeleton (GO:0098871)	CC
PICK1	female-amplifier	protein interacting with PRKCA 1	GO:0098843	postsynaptic endocytic zone (GO:0098843)	CC
TRIO	female-amplifier	trio Rho guanine nucleotide exchange factor	GO:0048786	presynaptic active zone (GO:0048786)	CC
ANO2	female-amplifier	anoctamin 2	GO:0099056	integral component of presynaptic membrane (GO:0099056)	CC
RAB17	female-amplifier	RAB17, member RAS oncogene family	GO:0098794	postsynapse (GO:0098794)	CC
AXIN1	female-amplifier	axin 1	GO:0045202	synapse (GO:0045202)	CC
ARHGEF15	female-amplifier	Rho guanine nucleotide exchange factor 15	GO:0098794	postsynapse (GO:0098794)	CC
DACT1	female-amplifier	dishevelled binding antagonist of beta catenin 1	GO:0098794	postsynapse (GO:0098794)	CC
CTBP2	female-amplifier	C-terminal binding protein 2	GO:0098831	presynaptic active zone cytoplasmic component (GO:0098831)	CC
CALD1	female-amplifier	caldesmon 1	GO:0098794	postsynapse (GO:0098794)	CC
EIF4E	female-amplifier	eukaryotic translation initiation factor 4E	GO:0098794	postsynapse (GO:0098794)	CC
KCNAB2	female-amplifier	potassium voltage-gated channel subfamily A regulatory beta subunit 2	GO:0099061	integral component of postsynaptic density membrane (GO:0099061)	CC
EEF2K	female-amplifier	eukaryotic elongation factor 2 kinase	GO:0014069	postsynaptic density (GO:0014069)	CC
HNRNPM	female-amplifier	heterogeneous nuclear ribonucleoprotein M	GO:0014069	postsynaptic density (GO:0014069)	CC
AGAP2	female-amplifier	ArfGAP with GTPase domain, ankyrin repeat and PH domain 2	GO:0098794	postsynapse (GO:0098794)	CC
RPL13	female-amplifier	ribosomal protein L13	SYNGO:postsyn_ribosome	postsynaptic ribosome	CC
RPL13	female-amplifier	ribosomal protein L13	GO:0045202	synapse (GO:0045202)	CC
RPL23A	female-amplifier	ribosomal protein L23a	GO:0045202	synapse (GO:0045202)	CC
RPL23A	female-amplifier	ribosomal protein L23a	SYNGO:postsyn_ribosome	postsynaptic ribosome	CC
RPL35	female-amplifier	ribosomal protein L35	GO:0045202	synapse (GO:0045202)	CC
RPLP1	female-amplifier	ribosomal protein lateral stalk subunit P1	GO:0045202	synapse (GO:0045202)	CC
RPL35	female-amplifier	ribosomal protein L35	SYNGO:postsyn_ribosome	postsynaptic ribosome	CC
RPLP1	female-amplifier	ribosomal protein lateral stalk subunit P1	SYNGO:postsyn_ribosome	postsynaptic ribosome	CC
RPS18	female-amplifier	ribosomal protein S18	SYNGO:postsyn_ribosome	postsynaptic ribosome	CC
RPS20	female-amplifier	ribosomal protein S20	SYNGO:postsyn_ribosome	postsynaptic ribosome	CC
RPL13	female-amplifier	ribosomal protein L13	SYNGO:presyn_ribosome	presynaptic ribosome	CC
RPL23A	female-amplifier	ribosomal protein L23a	SYNGO:presyn_ribosome	presynaptic ribosome	CC
RPL35	female-amplifier	ribosomal protein L35	SYNGO:presyn_ribosome	presynaptic ribosome	CC
CTTN	female-amplifier	cortactin	GO:0098794	postsynapse (GO:0098794)	CC
SEMA4B	female-amplifier	semaphorin 4B	GO:0099061	integral component of postsynaptic density membrane (GO:0099061)	CC
AGAP3	female-amplifier	ArfGAP with GTPase domain, ankyrin repeat and PH domain 3	GO:0014069	postsynaptic density (GO:0014069)	CC
PTK2B	female-amplifier	protein tyrosine kinase 2 beta	GO:0099092	postsynaptic density, intracellular component (GO:0099092)	CC
PTK2B	female-amplifier	protein tyrosine kinase 2 beta	GO:0099092	postsynaptic density, intracellular component (GO:0099092)	CC
PTK2B	female-amplifier	protein tyrosine kinase 2 beta	GO:0098793	presynapse (GO:0098793)	CC
EIF6	female-amplifier	eukaryotic translation initiation factor 6	GO:0045202	synapse (GO:0045202)	CC
HNRNPF	female-amplifier	heterogeneous nuclear ribonucleoprotein F	GO:0045202	synapse (GO:0045202)	CC
HNRNPM	female-amplifier	heterogeneous nuclear ribonucleoprotein M	GO:0045202	synapse (GO:0045202)	CC
HNRNPUL1	female-amplifier	heterogeneous nuclear ribonucleoprotein U like 1	GO:0045202	synapse (GO:0045202)	CC
RPS6KA4	female-amplifier	ribosomal protein S6 kinase A4	GO:0045202	synapse (GO:0045202)	CC
TDRD5	female-amplifier	tudor domain containing 5	GO:0045202	synapse (GO:0045202)	CC
TSC2	female-amplifier	TSC complex subunit 2	GO:0045202	synapse (GO:0045202)	CC
AP2M1	female-amplifier	adaptor related protein complex 2 subunit mu 1	GO:0045202	synapse (GO:0045202)	CC
AP2M1	female-amplifier	adaptor related protein complex 2 subunit mu 1	GO:0098894	extrinsic component of presynaptic endocytic zone membrane (GO:0098894)	CC
PTPRN2	female-amplifier	protein tyrosine phosphatase receptor type N2	GO:0098793	presynapse (GO:0098793)	CC
NGEF	female-amplifier	neuronal guanine nucleotide exchange factor	GO:0098794	postsynapse (GO:0098794)	CC
PRKAR1B	female-amplifier	protein kinase cAMP-dependent type I regulatory subunit beta	GO:0098794	postsynapse (GO:0098794)	CC
RIMS1	female-amplifier	regulating synaptic membrane exocytosis 1	GO:0098891	extrinsic component of presynaptic active zone membrane (GO:0098891)	CC
PHB	female-amplifier	prohibitin 1	GO:0045202	synapse (GO:0045202)	CC
RALA	female-amplifier	RAS like proto-oncogene A	GO:0097060	synaptic membrane (GO:0097060)	CC
ATP8A1	female-amplifier	ATPase phospholipid transporting 8A1	GO:0045202	synapse (GO:0045202)	CC
APP	female-amplifier	amyloid beta precursor protein	GO:0098992	neuronal dense core vesicle (GO:0098992)	CC
GRM4	female-amplifier	glutamate metabotropic receptor 4	GO:0099059	integral component of presynaptic active zone membrane (GO:0099059)	CC
NPFF	female-amplifier	neuropeptide FF-amide peptide precursor	GO:0098992	neuronal dense core vesicle (GO:0098992)	CC
ATP2B2	female-amplifier	ATPase plasma membrane Ca2+ transporting 2	GO:0042734	presynaptic membrane (GO:0042734)	CC
SDCBP	female-amplifier	syndecan binding protein	GO:0098793	presynapse (GO:0098793)	CC
ARL6IP5	female-amplifier	ADP ribosylation factor like GTPase 6 interacting protein 5	GO:0099523	presynaptic cytosol (GO:0099523)	CC
SNX16	female-amplifier	sorting nexin 16	GO:0098830	presynaptic endosome (GO:0098830)	CC
CTBP1	female-amplifier	C-terminal binding protein 1	GO:0098894	extrinsic component of presynaptic endocytic zone membrane (GO:0098894)	CC
GRIK2	female-amplifier	glutamate ionotropic receptor kainate type subunit 2	GO:0099055	integral component of postsynaptic membrane (GO:0099055)	CC
NRG3	female-amplifier	neuregulin 3	GO:0045202	synapse (GO:0045202)	CC
CD2AP	female-amplifier	CD2 associated protein	GO:0098793	presynapse (GO:0098793)	CC
PICK1	female-amplifier	protein interacting with PRKCA 1	GO:0008021	synaptic vesicle (GO:0008021)	CC
VTI1A	female-amplifier	vesicle transport through interaction with t-SNAREs 1A	GO:0008021	synaptic vesicle (GO:0008021)	CC
PICK1	female-amplifier	protein interacting with PRKCA 1	GO:0099572	postsynaptic specialization (GO:0099572)	CC
RAB11FIP3	female-amplifier	RAB11 family interacting protein 3	GO:0098944	postsynaptic recycling endosome membrane (GO:0098944)	CC
PPFIA1	female-amplifier	PTPRF interacting protein alpha 1	GO:0097444	spine apparatus (GO:0097444)	CC
PPFIA4	female-amplifier	PTPRF interacting protein alpha 4	GO:0098793	presynapse (GO:0098793)	CC
BDNF	female-amplifier	brain derived neurotrophic factor	GO:0098992	neuronal dense core vesicle (GO:0098992)	CC
APLP2	female-amplifier	amyloid beta precursor like protein 2	GO:0097444	spine apparatus (GO:0097444)	CC
ATP6V1B2	female-amplifier	ATPase H+ transporting V1 subunit B2	GO:0098850	extrinsic component of synaptic vesicle membrane (GO:0098850)	CC
ATP6V0D1	female-amplifier	ATPase H+ transporting V0 subunit d1	GO:0030285	integral component of synaptic vesicle membrane (GO:0030285)	CC
ATP6V1H	female-amplifier	ATPase H+ transporting V1 subunit H	GO:0098850	extrinsic component of synaptic vesicle membrane (GO:0098850)	CC
ATP6V1B1	female-amplifier	ATPase H+ transporting V1 subunit B1	GO:0098850	extrinsic component of synaptic vesicle membrane (GO:0098850)	CC
GRID2IP	female-amplifier	Grid2 interacting protein	GO:0099092	postsynaptic density, intracellular component (GO:0099092)	CC
MAP2	female-amplifier	microtubule associated protein 2	GO:0098794	postsynapse (GO:0098794)	CC
CD44	female-amplifier	CD44 molecule (Indian blood group)	GO:0098794	postsynapse (GO:0098794)	CC
CD44	female-amplifier	CD44 molecule (Indian blood group)	GO:0098793	presynapse (GO:0098793)	CC
PRMT8	female-amplifier	protein arginine methyltransferase 8	GO:0098794	postsynapse (GO:0098794)	CC
AP2A2	female-amplifier	adaptor related protein complex 2 subunit alpha 2	GO:0045202	synapse (GO:0045202)	CC
OPCML	female-amplifier	opioid binding protein/cell adhesion molecule like	GO:0014069	postsynaptic density (GO:0014069)	CC
EHD1	female-amplifier	EH domain containing 1	GO:0048786	presynaptic active zone (GO:0048786)	CC
NTN1	female-amplifier	netrin 1	GO:0045202	synapse (GO:0045202)	CC
BIN1	female-amplifier	bridging integrator 1	GO:0098794	postsynapse (GO:0098794)	CC
BIN1	female-amplifier	bridging integrator 1	GO:0098793	presynapse (GO:0098793)	CC
GLRA2	female-amplifier	glycine receptor alpha 2	GO:0099060	integral component of postsynaptic specialization membrane (GO:0099060)	CC
ACTN1	female-amplifier	actinin alpha 1	GO:0045202	synapse (GO:0045202)	CC
IGSF8	female-amplifier	immunoglobulin superfamily member 8	GO:0099056	integral component of presynaptic membrane (GO:0099056)	CC
STX7	female-amplifier	syntaxin 7	GO:0030285	integral component of synaptic vesicle membrane (GO:0030285)	CC
RAMP1	female-amplifier	receptor activity modifying protein 1	GO:0099699	integral component of synaptic membrane (GO:0099699)	CC
NOTCH1	female-amplifier	notch receptor 1	GO:0099061	integral component of postsynaptic density membrane (GO:0099061)	CC
MYLK	female-amplifier	myosin light chain kinase	GO:0045202	synapse (GO:0045202)	CC
CLTA	female-amplifier	clathrin light chain A	GO:0098843	postsynaptic endocytic zone (GO:0098843)	CC
SYNE1	female-amplifier	spectrin repeat containing nuclear envelope protein 1	GO:0098843	postsynaptic endocytic zone (GO:0098843)	CC
PICALM	female-amplifier	phosphatidylinositol binding clathrin assembly protein	GO:0098843	postsynaptic endocytic zone (GO:0098843)	CC
CAPN2	female-amplifier	calpain 2	GO:0098794	postsynapse (GO:0098794)	CC
AP1B1	female-amplifier	adaptor related protein complex 1 subunit beta 1	GO:0008021	synaptic vesicle (GO:0008021)	CC
AP1S1	female-amplifier	adaptor related protein complex 1 subunit sigma 1	GO:0098793	presynapse (GO:0098793)	CC
AP2A2	female-amplifier	adaptor related protein complex 2 subunit alpha 2	GO:0008021	synaptic vesicle (GO:0008021)	CC
AP2M1	female-amplifier	adaptor related protein complex 2 subunit mu 1	GO:0008021	synaptic vesicle (GO:0008021)	CC
SGIP1	female-amplifier	SH3GL interacting endocytic adaptor 1	GO:0098793	presynapse (GO:0098793)	CC
AGAP1	female-amplifier	ArfGAP with GTPase domain, ankyrin repeat and PH domain 1	GO:0098845	postsynaptic endosome (GO:0098845)	CC
NRXN3	female-amplifier	neurexin 3	GO:0099059	integral component of presynaptic active zone membrane (GO:0099059)	CC
ANK3	female-amplifier	ankyrin 3	GO:0098794	postsynapse (GO:0098794)	CC
ANK3	female-amplifier	ankyrin 3	GO:0014069	postsynaptic density (GO:0014069)	CC
PRICKLE2	female-amplifier	prickle planar cell polarity protein 2	GO:0014069	postsynaptic density (GO:0014069)	CC
PRICKLE2	female-amplifier	prickle planar cell polarity protein 2	GO:0014069	postsynaptic density (GO:0014069)	CC
CAMK2G	female-amplifier	calcium/calmodulin dependent protein kinase II gamma	GO:0099524	postsynaptic cytosol (GO:0099524)	CC
GNB2	female-amplifier	G protein subunit beta 2	GO:0030672	synaptic vesicle membrane (GO:0030672)	CC
GNG7	female-amplifier	G protein subunit gamma 7	GO:0030672	synaptic vesicle membrane (GO:0030672)	CC
GNB2	female-amplifier	G protein subunit beta 2	GO:0045202	synapse (GO:0045202)	CC
GNG7	female-amplifier	G protein subunit gamma 7	GO:0045202	synapse (GO:0045202)	CC
CRTAC1	female-amplifier	cartilage acidic protein 1	GO:0014069	postsynaptic density (GO:0014069)	CC
LNX1	female-amplifier	ligand of numb-protein X 1	GO:0098794	postsynapse (GO:0098794)	CC
VTI1A	female-amplifier	vesicle transport through interaction with t-SNAREs 1A	GO:0030285	integral component of synaptic vesicle membrane (GO:0030285)	CC
LRP8	female-amplifier	LDL receptor related protein 8	GO:0099061	integral component of postsynaptic density membrane (GO:0099061)	CC
NOTCH1	female-amplifier	notch receptor 1	GO:0099061	integral component of postsynaptic density membrane (GO:0099061)	CC
INPP4A	female-amplifier	inositol polyphosphate-4-phosphatase type I A	GO:0014069	postsynaptic density (GO:0014069)	CC
ACTN1	female-amplifier	actinin alpha 1	GO:0098871	postsynaptic actin cytoskeleton (GO:0098871)	CC
LRP1	female-amplifier	LDL receptor related protein 1	GO:0099061	integral component of postsynaptic density membrane (GO:0099061)	CC
ASAM	female-amplifier	CXADR like membrane protein	GO:0099055	integral component of postsynaptic membrane (GO:0099055)	CC
RICS	female-amplifier	Rho GTPase activating protein 32	GO:0014069	postsynaptic density (GO:0014069)	CC
EIF2C2	female-amplifier	argonaute RISC catalytic component 2	GO:0098794	postsynapse (GO:0098794)	CC
ENAH	female-amplifier	ENAH actin regulator	GO:0098794	postsynapse (GO:0098794)	CC
MKLN1	female-amplifier	muskelin 1	GO:0099164	postsynaptic specialization membrane of symmetric synapse (GO:0099164)	CC
MKLN1	female-amplifier	muskelin 1	GO:0098895	postsynaptic endosome membrane (GO:0098895)	CC
PSD3	female-amplifier	pleckstrin and Sec7 domain containing 3	GO:0098794	postsynapse (GO:0098794)	CC
UBE2I	female-amplifier	ubiquitin conjugating enzyme E2 I	GO:0099523	presynaptic cytosol (GO:0099523)	CC
UBE2I	female-amplifier	ubiquitin conjugating enzyme E2 I	GO:0099524	postsynaptic cytosol (GO:0099524)	CC
PDLIM4	female-amplifier	PDZ and LIM domain 4	GO:0014069	postsynaptic density (GO:0014069)	CC
PDLIM5	female-amplifier	PDZ and LIM domain 5	GO:0098794	postsynapse (GO:0098794)	CC
PDLIM5	female-amplifier	PDZ and LIM domain 5	GO:0098793	presynapse (GO:0098793)	CC
RGS12	female-amplifier	regulator of G protein signaling 12	GO:0098794	postsynapse (GO:0098794)	CC
NAPEPLD	female-amplifier	N-acyl phosphatidylethanolamine phospholipase D	SYNGO:presyn_ser_membrane	presynaptic SER membrane	CC
NAPEPLD	female-amplifier	N-acyl phosphatidylethanolamine phospholipase D	GO:0042734	presynaptic membrane (GO:0042734)	CC
NAPEPLD	female-amplifier	N-acyl phosphatidylethanolamine phospholipase D	GO:0045211	postsynaptic membrane (GO:0045211)	CC
SLC4A8	female-amplifier	solute carrier family 4 member 8	GO:0099056	integral component of presynaptic membrane (GO:0099056)	CC
PRRT1	female-amplifier	proline rich transmembrane protein 1	GO:0099061	integral component of postsynaptic density membrane (GO:0099061)	CC
CACNG8	female-amplifier	calcium voltage-gated channel auxiliary subunit gamma 8	GO:0099061	integral component of postsynaptic density membrane (GO:0099061)	CC
KIF21B	female-amplifier	kinesin family member 21B	GO:0098845	postsynaptic endosome (GO:0098845)	CC
DOCK1	female-amplifier	dedicator of cytokinesis 1	GO:0098794	postsynapse (GO:0098794)	CC
DOCK4	female-amplifier	dedicator of cytokinesis 4	GO:0098794	postsynapse (GO:0098794)	CC
SEPT4	female-amplifier	septin 4	GO:0098793	presynapse (GO:0098793)	CC
SEPT9	female-amplifier	septin 9	GO:0098793	presynapse (GO:0098793)	CC
SYNCRIP	female-amplifier	synaptotagmin binding cytoplasmic RNA interacting protein	GO:0014069	postsynaptic density (GO:0014069)	CC
RNF220	female-amplifier	ring finger protein 220	GO:0098794	postsynapse (GO:0098794)	CC
MIB2	female-amplifier	MIB E3 ubiquitin protein ligase 2	GO:0098794	postsynapse (GO:0098794)	CC
APBB1	female-amplifier	amyloid beta precursor protein binding family B member 1	GO:0098793	presynapse (GO:0098793)	CC
APBB1	female-amplifier	amyloid beta precursor protein binding family B member 1	GO:0014069	postsynaptic density (GO:0014069)	CC
MYH10	female-amplifier	myosin heavy chain 10	GO:0098871	postsynaptic actin cytoskeleton (GO:0098871)	CC
MYO9B	female-amplifier	myosin IXB	GO:0098871	postsynaptic actin cytoskeleton (GO:0098871)	CC
SRGAP3	female-amplifier	SLIT-ROBO Rho GTPase activating protein 3	GO:0098794	postsynapse (GO:0098794)	CC
ANK3	female-amplifier	ankyrin 3	GO:0098794	postsynapse (GO:0098794)	CC
PCDH7	female-amplifier	protocadherin 7	GO:0014069	postsynaptic density (GO:0014069)	CC
OSBPL2	female-amplifier	oxysterol binding protein like 2	GO:0098831	presynaptic active zone cytoplasmic component (GO:0098831)	CC
UBE2N	female-amplifier	ubiquitin conjugating enzyme E2 N	GO:0098794	postsynapse (GO:0098794)	CC
RAC1	female-amplifier	Rac family small GTPase 1	GO:0098993	anchored component of synaptic vesicle membrane (GO:0098993)	CC
RAC1	female-amplifier	Rac family small GTPase 1	GO:0099026	anchored component of presynaptic membrane (GO:0099026)	CC
RAC1	female-amplifier	Rac family small GTPase 1	GO:0099025	anchored component of postsynaptic membrane (GO:0099025)	CC
FMNL2	female-amplifier	formin like 2	GO:0098794	postsynapse (GO:0098794)	CC
BAIAP2	female-amplifier	BAR/IMD domain containing adaptor protein 2	GO:0014069	postsynaptic density (GO:0014069)	CC
S1PR1	female-amplifier	sphingosine-1-phosphate receptor 1	GO:0098793	presynapse (GO:0098793)	CC
S1PR4	female-amplifier	sphingosine-1-phosphate receptor 4	GO:0098793	presynapse (GO:0098793)	CC
THY1	female-amplifier	Thy-1 cell surface antigen	GO:0098794	postsynapse (GO:0098794)	CC
THY1	female-amplifier	Thy-1 cell surface antigen	GO:0098793	presynapse (GO:0098793)	CC
WIPF3	female-amplifier	WAS/WASL interacting protein family member 3	GO:0045202	synapse (GO:0045202)	CC
MKL2	female-amplifier	myocardin related transcription factor B	GO:0098793	presynapse (GO:0098793)	CC
MKL2	female-amplifier	myocardin related transcription factor B	GO:0098794	postsynapse (GO:0098794)	CC
TANC2	female-amplifier	tetratricopeptide repeat, ankyrin repeat and coiled-coil containing 2	GO:0014069	postsynaptic density (GO:0014069)	CC
RAPGEF2	female-amplifier	Rap guanine nucleotide exchange factor 2	GO:0098794	postsynapse (GO:0098794)	CC
ACCN1	female-amplifier	acid sensing ion channel subunit 2	GO:0099061	integral component of postsynaptic density membrane (GO:0099061)	CC
NRXN2	female-amplifier	neurexin 2	GO:0099059	integral component of presynaptic active zone membrane (GO:0099059)	CC
ATP8A1	female-amplifier	ATPase phospholipid transporting 8A1	GO:0030285	integral component of synaptic vesicle membrane (GO:0030285)	CC
MINK1	female-amplifier	misshapen like kinase 1	GO:0098794	postsynapse (GO:0098794)	CC
ABLIM1	female-amplifier	actin binding LIM protein 1	GO:0014069	postsynaptic density (GO:0014069)	CC
CNTN1	female-amplifier	contactin 1	GO:0045202	synapse (GO:0045202)	CC
PLXNA1	female-amplifier	plexin A1	GO:0045202	synapse (GO:0045202)	CC
WDR1	female-amplifier	WD repeat domain 1	GO:0045202	synapse (GO:0045202)	CC
KCNA4	male-amplifier	potassium voltage-gated channel subfamily A member 4	GO:0099508	voltage-gated ion channel activity involved in regulation of presynaptic membrane potential (GO:0099508)	BP
NPTN	male-amplifier	neuroplastin	GO:0099557	trans-synaptic signaling by trans-synaptic complex, modulating synaptic transmission (GO:0099557)	BP
NAPA	male-amplifier	NSF attachment protein alpha	GO:0016082	synaptic vesicle priming (GO:0016082)	BP
SNAPIN	male-amplifier	SNAP associated protein	GO:2000300	regulation of synaptic vesicle exocytosis (GO:2000300)	BP
PRKCG	male-amplifier	protein kinase C gamma	GO:2000300	regulation of synaptic vesicle exocytosis (GO:2000300)	BP
PRKCA	male-amplifier	protein kinase C alpha	GO:2000300	regulation of synaptic vesicle exocytosis (GO:2000300)	BP
CTBP2	male-amplifier	C-terminal binding protein 2	GO:0016081	synaptic vesicle docking (GO:0016081)	BP
CDK5	male-amplifier	cyclin dependent kinase 5	GO:0099509	regulation of presynaptic cytosolic calcium levels (GO:0099509)	BP
PRKCE	male-amplifier	protein kinase C epsilon	GO:0099171	presynaptic modulation of chemical synaptic transmission (GO:0099171)	BP
BSN	male-amplifier	bassoon presynaptic cytomatrix protein	GO:0098882	structural constituent of active zone (GO:0098882)	BP
BSN	male-amplifier	bassoon presynaptic cytomatrix protein	GO:0098693	regulation of synaptic vesicle cycle (GO:0098693)	BP
ITPR1	male-amplifier	inositol 1,4,5-trisphosphate receptor type 1	GO:0098695	inositol 1,4,5-trisphosphate receptor activity involved in regulation of postsynaptic cytosolic calcium levels (GO:0098695)	BP
EXOC2	male-amplifier	exocyst complex component 2	GO:0090128	regulation of synapse maturation (GO:0090128)	BP
FLOT1	male-amplifier	flotillin 1	GO:0051580	regulation of neurotransmitter uptake (GO:0051580)	BP
FILIP1	male-amplifier	filamin A interacting protein 1	GO:0099010	modification of postsynaptic structure (GO:0099010)	BP
PRKCZ	male-amplifier	protein kinase C zeta	GO:0098696	regulation of neurotransmitter receptor localization to postsynaptic specialization membrane (GO:0098696)	BP
SYNPO	male-amplifier	synaptopodin	GO:0099170	postsynaptic modulation of chemical synaptic transmission (GO:0099170)	BP
SYNPO	male-amplifier	synaptopodin	GO:0099566	regulation of postsynaptic cytosolic calcium levels (GO:0099566)	BP
EFNB2	male-amplifier	ephrin B2	GO:0099072	regulation of postsynaptic membrane neurotransmitter receptor levels (GO:0099072)	BP
CANX	male-amplifier	calnexin	GO:0048488	synaptic vesicle endocytosis (GO:0048488)	BP
EPHA4	male-amplifier	EPH receptor A4	GO:0098883	synapse disassembly (GO:0098883)	BP
NPTX2	male-amplifier	neuronal pentraxin 2	GO:0099645	neurotransmitter receptor localization to postsynaptic specialization membrane (GO:0099645)	BP
RIMS3	male-amplifier	regulating synaptic membrane exocytosis 3	GO:0050807	regulation of synapse organization (GO:0050807)	BP
ERC2	male-amplifier	ELKS/RAB6-interacting/CAST family member 2	GO:0016082	synaptic vesicle priming (GO:0016082)	BP
EFNB2	male-amplifier	ephrin B2	GO:0099149	regulation of postsynaptic neurotransmitter receptor endocytosis (GO:0099149)	BP
EFNB2	male-amplifier	ephrin B2	GO:0099054	presynapse assembly (GO:0099054)	BP
DVL1	male-amplifier	dishevelled segment polarity protein 1	GO:0099054	presynapse assembly (GO:0099054)	BP
SYDE1	male-amplifier	synapse defective Rho GTPase homolog 1	GO:0007416	synapse assembly (GO:0007416)	BP
SYDE2	male-amplifier	synapse defective Rho GTPase homolog 2	GO:0007416	synapse assembly (GO:0007416)	BP
SLC10A4	male-amplifier	solute carrier family 10 member 4	GO:0099162	regulation of synaptic vesicle neurotransmitter loading (GO:0099162)	BP
EFNB1	male-amplifier	ephrin B1	GO:0099054	presynapse assembly (GO:0099054)	BP
CTBP1	male-amplifier	C-terminal binding protein 1	GO:0099526	presynapse to nucleus signaling pathway (GO:0099526)	BP
ERC2	male-amplifier	ELKS/RAB6-interacting/CAST family member 2	GO:0098882	structural constituent of active zone (GO:0098882)	BP
BSN	male-amplifier	bassoon presynaptic cytomatrix protein	GO:0098882	structural constituent of active zone (GO:0098882)	BP
CACNA1A	male-amplifier	calcium voltage-gated channel subunit alpha1 A	GO:0099626	voltage-gated calcium channel activity involved in regulation of presynaptic cytosolic calcium levels (GO:0099626)	BP
PRKAR1B	male-amplifier	protein kinase cAMP-dependent type I regulatory subunit beta	GO:0050804	modulation of chemical synaptic transmission (GO:0050804)	BP
PRKAR1B	male-amplifier	protein kinase cAMP-dependent type I regulatory subunit beta	GO:0098693	regulation of synaptic vesicle cycle (GO:0098693)	BP
PRKAR1B	male-amplifier	protein kinase cAMP-dependent type I regulatory subunit beta	GO:0050804	modulation of chemical synaptic transmission (GO:0050804)	BP
CYFIP1	male-amplifier	cytoplasmic FMR1 interacting protein 1	GO:1905274	regulation of modification of postsynaptic actin cytoskeleton (GO:1905274)	BP
CACNA1B	male-amplifier	calcium voltage-gated channel subunit alpha1 B	GO:0099626	voltage-gated calcium channel activity involved in regulation of presynaptic cytosolic calcium levels (GO:0099626)	BP
CTBP2	male-amplifier	C-terminal binding protein 2	GO:0098882	structural constituent of active zone (GO:0098882)	BP
SLC18A2	male-amplifier	solute carrier family 18 member A2	GO:0098700	synaptic vesicle neurotransmitter loading (GO:0098700)	BP
AGRN	male-amplifier	agrin	GO:0050807	regulation of synapse organization (GO:0050807)	BP
MECP2	male-amplifier	methyl-CpG binding protein 2	GO:0050807	regulation of synapse organization (GO:0050807)	BP
ELAVL4	male-amplifier	ELAV like RNA binding protein 4	GO:0140245	regulation of translation at postsynapse (GO:0140245)	BP
BAIAP2	male-amplifier	BAR/IMD domain containing adaptor protein 2	GO:0050804	modulation of chemical synaptic transmission (GO:0050804)	BP
WASF3	male-amplifier	WASP family member 3	GO:0098885	modification of postsynaptic actin cytoskeleton (GO:0098885)	BP
WASF2	male-amplifier	WASP family member 2	GO:0098974	postsynaptic actin cytoskeleton organization (GO:0098974)	BP
CPLX2	male-amplifier	complexin 2	GO:0031630	regulation of synaptic vesicle fusion to presynaptic active zone membrane (GO:0031630)	BP
DNM1	male-amplifier	dynamin 1	GO:0048488	synaptic vesicle endocytosis (GO:0048488)	BP
DNAJC5	male-amplifier	DnaJ heat shock protein family (Hsp40) member C5	GO:0098693	regulation of synaptic vesicle cycle (GO:0098693)	BP
DNM3	male-amplifier	dynamin 3	GO:0048488	synaptic vesicle endocytosis (GO:0048488)	BP
RNF216	male-amplifier	ring finger protein 216	GO:0099546	protein catabolic process, modulating synaptic transmission (GO:0099546)	BP
AKAP12	male-amplifier	A-kinase anchoring protein 12	GO:0050804	modulation of chemical synaptic transmission (GO:0050804)	BP
FREQ	male-amplifier	neuronal calcium sensor 1	GO:0099509	regulation of presynaptic cytosolic calcium levels (GO:0099509)	BP
IL1RAP	male-amplifier	interleukin 1 receptor accessory protein	GO:1905606	regulation of presynapse assembly (GO:1905606)	BP
NAPA	male-amplifier	NSF attachment protein alpha	GO:0010807	regulation of synaptic vesicle priming (GO:0010807)	BP
FREQ	male-amplifier	neuronal calcium sensor 1	GO:2000300	regulation of synaptic vesicle exocytosis (GO:2000300)	BP
PIP5K1C	male-amplifier	phosphatidylinositol-4-phosphate 5-kinase type 1 gamma	GO:1900242	regulation of synaptic vesicle endocytosis (GO:1900242)	BP
SLC6A9	male-amplifier	solute carrier family 6 member 9	GO:0001504	neurotransmitter uptake (GO:0001504)	BP
SLC6A17	male-amplifier	solute carrier family 6 member 17	SYNGO:metabolism	metabolism	BP
SLC6A1	male-amplifier	solute carrier family 6 member 1	GO:0098810	neurotransmitter reuptake (GO:0098810)	BP
CTTN	male-amplifier	cortactin	GO:0098885	modification of postsynaptic actin cytoskeleton (GO:0098885)	BP
SLC6A6	male-amplifier	solute carrier family 6 member 6	SYNGO:transport	transport	BP
SLC6A4	male-amplifier	solute carrier family 6 member 4	GO:0098810	neurotransmitter reuptake (GO:0098810)	BP
SLC6A3	male-amplifier	solute carrier family 6 member 3	GO:0001504	neurotransmitter uptake (GO:0001504)	BP
SLC8A1	male-amplifier	solute carrier family 8 member A1	GO:1905060	calcium:cation antiporter activity involved in regulation of postsynaptic cytosolic calcium ion levels (GO:1905060)	BP
SLC6A2	male-amplifier	solute carrier family 6 member 2	GO:0098810	neurotransmitter reuptake (GO:0098810)	BP
SLC18A3	male-amplifier	solute carrier family 18 member A3	GO:0098700	synaptic vesicle neurotransmitter loading (GO:0098700)	BP
CYTH1	male-amplifier	cytohesin 1	GO:0099171	presynaptic modulation of chemical synaptic transmission (GO:0099171)	BP
P2RY2	male-amplifier	purinergic receptor P2Y2	GO:0099509	regulation of presynaptic cytosolic calcium levels (GO:0099509)	BP
NRXN1	male-amplifier	neurexin 1	GO:0150036	regulation of trans-synaptic signaling by endocannabinoid, modulating synaptic transmission (GO:0150036)	BP
NRXN1	male-amplifier	neurexin 1	GO:0098693	regulation of synaptic vesicle cycle (GO:0098693)	BP
DOCK1	male-amplifier	dedicator of cytokinesis 1	GO:0097091	synaptic vesicle clustering (GO:0097091)	BP
CTBP1	male-amplifier	C-terminal binding protein 1	GO:0099526	presynapse to nucleus signaling pathway (GO:0099526)	BP
EPS8	male-amplifier	EGFR pathway substrate 8, signaling adaptor	GO:0099072	regulation of postsynaptic membrane neurotransmitter receptor levels (GO:0099072)	BP
ODZ2	male-amplifier	teneurin transmembrane protein 2	GO:0099559	maintenance of alignment of postsynaptic density and presynaptic active zone (GO:0099559)	BP
ODZ4	male-amplifier	teneurin transmembrane protein 4	GO:0099559	maintenance of alignment of postsynaptic density and presynaptic active zone (GO:0099559)	BP
ODZ2	male-amplifier	teneurin transmembrane protein 2	GO:0099190	postsynaptic spectrin-associated cytoskeleton organization (GO:0099190)	BP
ODZ4	male-amplifier	teneurin transmembrane protein 4	GO:0099190	postsynaptic spectrin-associated cytoskeleton organization (GO:0099190)	BP
CAMK2B	male-amplifier	calcium/calmodulin dependent protein kinase II beta	GO:0098973	structural constituent of postsynaptic actin cytoskeleton (GO:0098973)	BP
GRIP1	male-amplifier	glutamate receptor interacting protein 1	GO:0098887	neurotransmitter receptor transport, endosome to postsynaptic membrane (GO:0098887)	BP
FLNA	male-amplifier	filamin A	GO:0050808	synapse organization (GO:0050808)	BP
PLD1	male-amplifier	phospholipase D1	GO:0098693	regulation of synaptic vesicle cycle (GO:0098693)	BP
CRTC1	male-amplifier	CREB regulated transcription coactivator 1	GO:0099527	postsynapse to nucleus signaling pathway (GO:0099527)	BP
CSNK2B	male-amplifier	casein kinase 2 beta	GO:0050807	regulation of synapse organization (GO:0050807)	BP
CNTN5	male-amplifier	contactin 5	GO:0099054	presynapse assembly (GO:0099054)	BP
ANKS1B	male-amplifier	ankyrin repeat and sterile alpha motif domain containing 1B	GO:0099527	postsynapse to nucleus signaling pathway (GO:0099527)	BP
PENK	male-amplifier	proenkephalin	GO:0099538	synaptic signaling via neuropeptide (GO:0099538)	BP
CAMK1	male-amplifier	calcium/calmodulin dependent protein kinase I	GO:0050807	regulation of synapse organization (GO:0050807)	BP
CAMK2A	male-amplifier	calcium/calmodulin dependent protein kinase II alpha	GO:0099148	regulation of synaptic vesicle docking (GO:0099148)	BP
CTNNA2	male-amplifier	catenin alpha 2	GO:0098885	modification of postsynaptic actin cytoskeleton (GO:0098885)	BP
CTTN	male-amplifier	cortactin	GO:0098885	modification of postsynaptic actin cytoskeleton (GO:0098885)	BP
HSPA8	male-amplifier	heat shock protein family A (Hsp70) member 8	GO:0016191	synaptic vesicle uncoating (GO:0016191)	BP
ODZ2	male-amplifier	teneurin transmembrane protein 2	GO:0098942	retrograde trans-synaptic signaling by trans-synaptic protein complex (GO:0098942)	BP
AP2M1	male-amplifier	adaptor related protein complex 2 subunit mu 1	GO:0048488	synaptic vesicle endocytosis (GO:0048488)	BP
PPFIA1	male-amplifier	PTPRF interacting protein alpha 1	GO:0099054	presynapse assembly (GO:0099054)	BP
PPFIA3	male-amplifier	PTPRF interacting protein alpha 3	GO:0099054	presynapse assembly (GO:0099054)	BP
PPFIBP2	male-amplifier	PPFIA binding protein 2	GO:0051963	regulation of synapse assembly (GO:0051963)	BP
IQSEC3	male-amplifier	IQ motif and Sec7 domain ArfGEF 3	GO:0099173	postsynapse organization (GO:0099173)	BP
RAPH1	male-amplifier	Ras association (RalGDS/AF-6) and pleckstrin homology domains 1	GO:0099054	presynapse assembly (GO:0099054)	BP
IQSEC2	male-amplifier	IQ motif and Sec7 domain ArfGEF 2	GO:0098696	regulation of neurotransmitter receptor localization to postsynaptic specialization membrane (GO:0098696)	BP
IQSEC1	male-amplifier	IQ motif and Sec7 domain ArfGEF 1	GO:0099149	regulation of postsynaptic neurotransmitter receptor endocytosis (GO:0099149)	BP
CDC42	male-amplifier	cell division cycle 42	GO:0099159	regulation of modification of postsynaptic structure (GO:0099159)	BP
IQSEC2	male-amplifier	IQ motif and Sec7 domain ArfGEF 2	GO:0050804	modulation of chemical synaptic transmission (GO:0050804)	BP
ADRA2A	male-amplifier	adrenoceptor alpha 2A	GO:0099171	presynaptic modulation of chemical synaptic transmission (GO:0099171)	BP
RAB35	male-amplifier	RAB35, member RAS oncogene family	GO:0099532	synaptic vesicle endosomal processing (GO:0099532)	BP
SLC18A3	male-amplifier	solute carrier family 18 member A3	GO:0098700	synaptic vesicle neurotransmitter loading (GO:0098700)	BP
GRIK3	male-amplifier	glutamate ionotropic receptor kainate type subunit 3	GO:0099507	ligand-gated ion channel activity involved in regulation of presynaptic membrane potential (GO:0099507)	BP
GRIK4	male-amplifier	glutamate ionotropic receptor kainate type subunit 4	GO:0099507	ligand-gated ion channel activity involved in regulation of presynaptic membrane potential (GO:0099507)	BP
SHANK3	male-amplifier	SH3 and multiple ankyrin repeat domains 3	GO:0098919	structural constituent of postsynaptic density (GO:0098919)	BP
SYN3	male-amplifier	synapsin III	GO:0097091	synaptic vesicle clustering (GO:0097091)	BP
SYNGR3	male-amplifier	synaptogyrin 3	GO:0051580	regulation of neurotransmitter uptake (GO:0051580)	BP
EPS15	male-amplifier	epidermal growth factor receptor pathway substrate 15	GO:0048488	synaptic vesicle endocytosis (GO:0048488)	BP
EPS15L1	male-amplifier	epidermal growth factor receptor pathway substrate 15 like 1	GO:0048488	synaptic vesicle endocytosis (GO:0048488)	BP
EPN1	male-amplifier	epsin 1	GO:0048488	synaptic vesicle endocytosis (GO:0048488)	BP
ITSN1	male-amplifier	intersectin 1	GO:0048488	synaptic vesicle endocytosis (GO:0048488)	BP
ITSN1	male-amplifier	intersectin 1	GO:1905274	regulation of modification of postsynaptic actin cytoskeleton (GO:1905274)	BP
GRIA4	male-amplifier	glutamate ionotropic receptor AMPA type subunit 4	GO:0099507	ligand-gated ion channel activity involved in regulation of presynaptic membrane potential (GO:0099507)	BP
EHD1	male-amplifier	EH domain containing 1	GO:0048488	synaptic vesicle endocytosis (GO:0048488)	BP
ERBB2IP	male-amplifier	erbb2 interacting protein	GO:0099072	regulation of postsynaptic membrane neurotransmitter receptor levels (GO:0099072)	BP
DNM2	male-amplifier	dynamin 2	GO:0048488	synaptic vesicle endocytosis (GO:0048488)	BP
AP3D1	male-amplifier	adaptor related protein complex 3 subunit delta 1	GO:0016182	synaptic vesicle budding from endosome (GO:0016182)	BP
STX6	male-amplifier	syntaxin 6	GO:0016189	synaptic vesicle to endosome fusion (GO:0016189)	BP
ANKS1B	male-amplifier	ankyrin repeat and sterile alpha motif domain containing 1B	GO:0099565	postsynaptic process involved in chemical synaptic transmission (GO:0099565)	BP
GABBR1	male-amplifier	gamma-aminobutyric acid type B receptor subunit 1	GO:0150047	G protein-coupled neurotransmitter receptor activity involved in regulation of presynaptic membrane potential (GO:0150047)	BP
MAP2K1	male-amplifier	mitogen-activated protein kinase kinase 1	GO:0098696	regulation of neurotransmitter receptor localization to postsynaptic specialization membrane (GO:0098696)	BP
PURA	male-amplifier	purine rich element binding protein A	GO:0098963	dendritic transport of messenger ribonucleoprotein complex (GO:0098963)	BP
PPP3CA	male-amplifier	protein phosphatase 3 catalytic subunit alpha	GO:0099170	postsynaptic modulation of chemical synaptic transmission (GO:0099170)	BP
ARL6IP5	male-amplifier	ADP ribosylation factor like GTPase 6 interacting protein 5	GO:0051580	regulation of neurotransmitter uptake (GO:0051580)	BP
EIF4EBP1	male-amplifier	eukaryotic translation initiation factor 4E binding protein 1	GO:0099577	regulation of translation at presynapse, modulating synaptic transmission (GO:0099577)	BP
CYFIP1	male-amplifier	cytoplasmic FMR1 interacting protein 1	GO:0099578	regulation of translation at postsynapse, modulating synaptic transmission (GO:0099578)	BP
SYNGAP1	male-amplifier	synaptic Ras GTPase activating protein 1	GO:0098880	maintenance of postsynaptic specialization structure (GO:0098880)	BP
PDE4A	male-amplifier	phosphodiesterase 4A	GO:0050804	modulation of chemical synaptic transmission (GO:0050804)	BP
GRIN2D	male-amplifier	glutamate ionotropic receptor NMDA type subunit 2D	GO:0099507	ligand-gated ion channel activity involved in regulation of presynaptic membrane potential (GO:0099507)	BP
HTT	male-amplifier	huntingtin	GO:0099527	postsynapse to nucleus signaling pathway (GO:0099527)	BP
KPNA1	male-amplifier	karyopherin subunit alpha 1	GO:0099527	postsynapse to nucleus signaling pathway (GO:0099527)	BP
SHANK3	male-amplifier	SH3 and multiple ankyrin repeat domains 3	GO:0098919	structural constituent of postsynaptic density (GO:0098919)	BP
KCNMA1	male-amplifier	potassium calcium-activated channel subfamily M alpha 1	GO:0099507	ligand-gated ion channel activity involved in regulation of presynaptic membrane potential (GO:0099507)	BP
SYN3	male-amplifier	synapsin III	GO:0099504	synaptic vesicle cycle (GO:0099504)	BP
BAIAP2	male-amplifier	BAR/IMD domain containing adaptor protein 2	GO:0050804	modulation of chemical synaptic transmission (GO:0050804)	BP
HTR2A	male-amplifier	5-hydroxytryptamine receptor 2A	GO:0099171	presynaptic modulation of chemical synaptic transmission (GO:0099171)	BP
BIN1	male-amplifier	bridging integrator 1	GO:0048488	synaptic vesicle endocytosis (GO:0048488)	BP
NRG1	male-amplifier	neuregulin 1	GO:1905606	regulation of presynapse assembly (GO:1905606)	BP
CACNA1D	male-amplifier	calcium voltage-gated channel subunit alpha1 D	GO:0099626	voltage-gated calcium channel activity involved in regulation of presynaptic cytosolic calcium levels (GO:0099626)	BP
GABBR1	male-amplifier	gamma-aminobutyric acid type B receptor subunit 1	GO:0099579	G protein-coupled neurotransmitter receptor activity involved in regulation of postsynaptic membrane potential (GO:0099579)	BP
CDH1	male-amplifier	cadherin 1	GO:0099576	regulation of protein catabolic process at postsynapse, modulating synaptic transmission (GO:0099576)	BP
BAIAP2	male-amplifier	BAR/IMD domain containing adaptor protein 2	GO:1905274	regulation of modification of postsynaptic actin cytoskeleton (GO:1905274)	BP
SYT2	male-amplifier	synaptotagmin 2	GO:0099502	calcium-dependent activation of synaptic vesicle fusion (GO:0099502)	BP
SEPT7	male-amplifier	septin 7	GO:0099173	postsynapse organization (GO:0099173)	BP
DPYSL2	male-amplifier	dihydropyrimidinase like 2	SYNGO:transport	transport	BP
DNM1	male-amplifier	dynamin 1	GO:0048488	synaptic vesicle endocytosis (GO:0048488)	BP
SPARC	male-amplifier	secreted protein acidic and cysteine rich	GO:0050807	regulation of synapse organization (GO:0050807)	BP
RPL22	male-amplifier	ribosomal protein L22	GO:0140236	translation at presynapse (GO:0140236)	BP
GIPC1	male-amplifier	GIPC PDZ domain containing family member 1	GO:0099171	presynaptic modulation of chemical synaptic transmission (GO:0099171)	BP
TUBB	male-amplifier	tubulin beta class I	GO:0050807	regulation of synapse organization (GO:0050807)	BP
LRRK2	male-amplifier	leucine rich repeat kinase 2	GO:1900242	regulation of synaptic vesicle endocytosis (GO:1900242)	BP
P2RY2	male-amplifier	purinergic receptor P2Y2	GO:2000300	regulation of synaptic vesicle exocytosis (GO:2000300)	BP
MAGI2	male-amplifier	membrane associated guanylate kinase, WW and PDZ domain containing 2	GO:0098879	structural constituent of postsynaptic specialization (GO:0098879)	BP
MAGI2	male-amplifier	membrane associated guanylate kinase, WW and PDZ domain containing 2	GO:0098696	regulation of neurotransmitter receptor localization to postsynaptic specialization membrane (GO:0098696)	BP
DGKQ	male-amplifier	diacylglycerol kinase theta	GO:1900242	regulation of synaptic vesicle endocytosis (GO:1900242)	BP
NRP2	male-amplifier	neuropilin 2	GO:0099175	regulation of postsynapse organization (GO:0099175)	BP
NRP1	male-amplifier	neuropilin 1	GO:0099173	postsynapse organization (GO:0099173)	BP
SGTA	male-amplifier	small glutamine rich tetratricopeptide repeat co-chaperone alpha	SYNGO:presyn_chaperoneProteinFolding	presynaptic chaperone-mediated protein folding	BP
NPTX2	male-amplifier	neuronal pentraxin 2	GO:0098962	regulation of postsynaptic neurotransmitter receptor activity (GO:0098962)	BP
FARP1	male-amplifier	FERM, ARH/RhoGEF and pleckstrin domain protein 1	GO:1905606	regulation of presynapse assembly (GO:1905606)	BP
FARP1	male-amplifier	FERM, ARH/RhoGEF and pleckstrin domain protein 1	GO:0098974	postsynaptic actin cytoskeleton organization (GO:0098974)	BP
DLGAP2	male-amplifier	DLG associated protein 2	GO:0098962	regulation of postsynaptic neurotransmitter receptor activity (GO:0098962)	BP
GIT1	male-amplifier	GIT ArfGAP 1	GO:0098879	structural constituent of postsynaptic specialization (GO:0098879)	BP
GIT1	male-amplifier	GIT ArfGAP 1	GO:2000300	regulation of synaptic vesicle exocytosis (GO:2000300)	BP
SRC	male-amplifier	SRC proto-oncogene, non-receptor tyrosine kinase	GO:0098962	regulation of postsynaptic neurotransmitter receptor activity (GO:0098962)	BP
ROCK2	male-amplifier	Rho associated coiled-coil containing protein kinase 2	GO:0098974	postsynaptic actin cytoskeleton organization (GO:0098974)	BP
GSK3B	male-amplifier	glycogen synthase kinase 3 beta	GO:0099159	regulation of modification of postsynaptic structure (GO:0099159)	BP
GSK3B	male-amplifier	glycogen synthase kinase 3 beta	GO:0099171	presynaptic modulation of chemical synaptic transmission (GO:0099171)	BP
TNIK	male-amplifier	TRAF2 and NCK interacting kinase	GO:0098696	regulation of neurotransmitter receptor localization to postsynaptic specialization membrane (GO:0098696)	BP
SIPA1L1	male-amplifier	signal induced proliferation associated 1 like 1	GO:0098974	postsynaptic actin cytoskeleton organization (GO:0098974)	BP
SLC1A2	male-amplifier	solute carrier family 1 member 2	GO:0098810	neurotransmitter reuptake (GO:0098810)	BP
IL1RAP	male-amplifier	interleukin 1 receptor accessory protein	GO:0099560	synapse adhesion between pre- and post-synapse (GO:0099560)	BP
IL1RAPL2	male-amplifier	interleukin 1 receptor accessory protein like 2	GO:1905606	regulation of presynapse assembly (GO:1905606)	BP
IL1RAP	male-amplifier	interleukin 1 receptor accessory protein	GO:0099151	regulation of postsynaptic density assembly (GO:0099151)	BP
IL1RAP	male-amplifier	interleukin 1 receptor accessory protein	GO:1905606	regulation of presynapse assembly (GO:1905606)	BP
IL1RAP	male-amplifier	interleukin 1 receptor accessory protein	GO:0099545	trans-synaptic signaling by trans-synaptic complex (GO:0099545)	BP
IL1RAP	male-amplifier	interleukin 1 receptor accessory protein	GO:0099545	trans-synaptic signaling by trans-synaptic complex (GO:0099545)	BP
IL1RAP	male-amplifier	interleukin 1 receptor accessory protein	GO:0099560	synapse adhesion between pre- and post-synapse (GO:0099560)	BP
ODZ2	male-amplifier	teneurin transmembrane protein 2	GO:0099559	maintenance of alignment of postsynaptic density and presynaptic active zone (GO:0099559)	BP
ODZ4	male-amplifier	teneurin transmembrane protein 4	GO:0099559	maintenance of alignment of postsynaptic density and presynaptic active zone (GO:0099559)	BP
SIPA1L1	male-amplifier	signal induced proliferation associated 1 like 1	GO:0099151	regulation of postsynaptic density assembly (GO:0099151)	BP
PTPRS	male-amplifier	protein tyrosine phosphatase receptor type S	GO:0099054	presynapse assembly (GO:0099054)	BP
NTRK3	male-amplifier	neurotrophic receptor tyrosine kinase 3	GO:0097107	postsynaptic density assembly (GO:0097107)	BP
NTRK3	male-amplifier	neurotrophic receptor tyrosine kinase 3	GO:1905606	regulation of presynapse assembly (GO:1905606)	BP
PTPRS	male-amplifier	protein tyrosine phosphatase receptor type S	GO:0099151	regulation of postsynaptic density assembly (GO:0099151)	BP
MTOR	male-amplifier	mechanistic target of rapamycin kinase	GO:0099547	regulation of translation at synapse, modulating synaptic transmission (GO:0099547)	BP
BAI1	male-amplifier	adhesion G protein-coupled receptor B1	GO:0098974	postsynaptic actin cytoskeleton organization (GO:0098974)	BP
MAGI2	male-amplifier	membrane associated guanylate kinase, WW and PDZ domain containing 2	GO:0098919	structural constituent of postsynaptic density (GO:0098919)	BP
SEMA3F	male-amplifier	semaphorin 3F	GO:0099175	regulation of postsynapse organization (GO:0099175)	BP
GSK3B	male-amplifier	glycogen synthase kinase 3 beta	GO:0098696	regulation of neurotransmitter receptor localization to postsynaptic specialization membrane (GO:0098696)	BP
PAK1	male-amplifier	p21 (RAC1) activated kinase 1	GO:0090128	regulation of synapse maturation (GO:0090128)	BP
SLC6A1	male-amplifier	solute carrier family 6 member 1	GO:0098810	neurotransmitter reuptake (GO:0098810)	BP
BCAN	male-amplifier	brevican	GO:0060074	synapse maturation (GO:0060074)	BP
ARHGAP22	male-amplifier	Rho GTPase activating protein 22	GO:0099175	regulation of postsynapse organization (GO:0099175)	BP
GIT2	male-amplifier	GIT ArfGAP 2	GO:2000300	regulation of synaptic vesicle exocytosis (GO:2000300)	BP
MAGI2	male-amplifier	membrane associated guanylate kinase, WW and PDZ domain containing 2	GO:0099179	regulation of synaptic membrane adhesion (GO:0099179)	BP
DBN1	male-amplifier	drebrin 1	GO:0098974	postsynaptic actin cytoskeleton organization (GO:0098974)	BP
NRXN1	male-amplifier	neurexin 1	GO:0099054	presynapse assembly (GO:0099054)	BP
NRXN1	male-amplifier	neurexin 1	GO:0099151	regulation of postsynaptic density assembly (GO:0099151)	BP
GIT1	male-amplifier	GIT ArfGAP 1	GO:0099645	neurotransmitter receptor localization to postsynaptic specialization membrane (GO:0099645)	BP
SHANK2	male-amplifier	SH3 and multiple ankyrin repeat domains 2	GO:0098919	structural constituent of postsynaptic density (GO:0098919)	BP
SHANK3	male-amplifier	SH3 and multiple ankyrin repeat domains 3	GO:0098919	structural constituent of postsynaptic density (GO:0098919)	BP
SHANK2	male-amplifier	SH3 and multiple ankyrin repeat domains 2	GO:0099175	regulation of postsynapse organization (GO:0099175)	BP
SHANK3	male-amplifier	SH3 and multiple ankyrin repeat domains 3	GO:0099175	regulation of postsynapse organization (GO:0099175)	BP
CHRNA9	male-amplifier	cholinergic receptor nicotinic alpha 9 subunit	GO:1904315	transmitter-gated ion channel activity involved in regulation of postsynaptic membrane potential (GO:1904315)	BP
CHRNA6	male-amplifier	cholinergic receptor nicotinic alpha 6 subunit	GO:0099171	presynaptic modulation of chemical synaptic transmission (GO:0099171)	BP
GABRB3	male-amplifier	gamma-aminobutyric acid type A receptor subunit beta3	GO:1904315	transmitter-gated ion channel activity involved in regulation of postsynaptic membrane potential (GO:1904315)	BP
KPNA2	male-amplifier	karyopherin subunit alpha 2	GO:0099527	postsynapse to nucleus signaling pathway (GO:0099527)	BP
PORCN	male-amplifier	porcupine O-acyltransferase	GO:0099072	regulation of postsynaptic membrane neurotransmitter receptor levels (GO:0099072)	BP
CAMK2A	male-amplifier	calcium/calmodulin dependent protein kinase II alpha	GO:0098696	regulation of neurotransmitter receptor localization to postsynaptic specialization membrane (GO:0098696)	BP
GABRA4	male-amplifier	gamma-aminobutyric acid type A receptor subunit alpha4	GO:1904315	transmitter-gated ion channel activity involved in regulation of postsynaptic membrane potential (GO:1904315)	BP
KALRN	male-amplifier	kalirin RhoGEF kinase	GO:0098696	regulation of neurotransmitter receptor localization to postsynaptic specialization membrane (GO:0098696)	BP
TIAM1	male-amplifier	TIAM Rac1 associated GEF 1	GO:1905274	regulation of modification of postsynaptic actin cytoskeleton (GO:1905274)	BP
NTRK2	male-amplifier	neurotrophic receptor tyrosine kinase 2	GO:0099183	trans-synaptic signaling by BDNF, modulating synaptic transmission (GO:0099183)	BP
RICH2	male-amplifier	Rho GTPase activating protein 44	GO:0099010	modification of postsynaptic structure (GO:0099010)	BP
RICH2	male-amplifier	Rho GTPase activating protein 44	GO:0099152	regulation of neurotransmitter receptor transport, endosome to postsynaptic membrane (GO:0099152)	BP
DAGLA	male-amplifier	diacylglycerol lipase alpha	GO:0098921	retrograde trans-synaptic signaling by endocannabinoid (GO:0098921)	BP
SHISA9	male-amplifier	shisa family member 9	GO:0098962	regulation of postsynaptic neurotransmitter receptor activity (GO:0098962)	BP
MYH10	male-amplifier	myosin heavy chain 10	GO:1905274	regulation of modification of postsynaptic actin cytoskeleton (GO:1905274)	BP
KPNA2	male-amplifier	karyopherin subunit alpha 2	GO:0099527	postsynapse to nucleus signaling pathway (GO:0099527)	BP
SNAP47	male-amplifier	synaptosome associated protein 47	GO:0098967	exocytic insertion of neurotransmitter receptor to postsynaptic membrane (GO:0098967)	BP
AP3D1	male-amplifier	adaptor related protein complex 3 subunit delta 1	GO:0016182	synaptic vesicle budding from endosome (GO:0016182)	BP
ABHD6	male-amplifier	abhydrolase domain containing 6, acylglycerol lipase	GO:0099178	regulation of retrograde trans-synaptic signaling by endocanabinoid (GO:0099178)	BP
AP2M1	male-amplifier	adaptor related protein complex 2 subunit mu 1	GO:0098884	postsynaptic neurotransmitter receptor endocytosis (GO:0098884)	BP
AP3D1	male-amplifier	adaptor related protein complex 3 subunit delta 1	GO:0098943	neurotransmitter receptor transport, postsynaptic endosome to lysosome (GO:0098943)	BP
STAU1	male-amplifier	staufen double-stranded RNA binding protein 1	GO:0099010	modification of postsynaptic structure (GO:0099010)	BP
STAU1	male-amplifier	staufen double-stranded RNA binding protein 1	GO:0050804	modulation of chemical synaptic transmission (GO:0050804)	BP
KALRN	male-amplifier	kalirin RhoGEF kinase	GO:1905274	regulation of modification of postsynaptic actin cytoskeleton (GO:1905274)	BP
GABRG3	male-amplifier	gamma-aminobutyric acid type A receptor subunit gamma3	GO:1904315	transmitter-gated ion channel activity involved in regulation of postsynaptic membrane potential (GO:1904315)	BP
GABRE	male-amplifier	gamma-aminobutyric acid type A receptor subunit epsilon	GO:1904315	transmitter-gated ion channel activity involved in regulation of postsynaptic membrane potential (GO:1904315)	BP
PRR7	male-amplifier	proline rich 7, synaptic	GO:0099527	postsynapse to nucleus signaling pathway (GO:0099527)	BP
GABRR2	male-amplifier	gamma-aminobutyric acid type A receptor subunit rho2	GO:1904315	transmitter-gated ion channel activity involved in regulation of postsynaptic membrane potential (GO:1904315)	BP
RELA	male-amplifier	RELA proto-oncogene, NF-kB subunit	GO:0099527	postsynapse to nucleus signaling pathway (GO:0099527)	BP
P2RX3	male-amplifier	purinergic receptor P2X 3	GO:0050804	modulation of chemical synaptic transmission (GO:0050804)	BP
PLS3	male-amplifier	plastin 3	GO:0098699	structural constituent of presynaptic actin cytoskeleton (GO:0098699)	BP
FARP1	male-amplifier	FERM, ARH/RhoGEF and pleckstrin domain protein 1	GO:0098942	retrograde trans-synaptic signaling by trans-synaptic protein complex (GO:0098942)	BP
CHRM2	male-amplifier	cholinergic receptor muscarinic 2	GO:0099171	presynaptic modulation of chemical synaptic transmission (GO:0099171)	BP
CDH11	male-amplifier	cadherin 11	GO:0050804	modulation of chemical synaptic transmission (GO:0050804)	BP
PTPRS	male-amplifier	protein tyrosine phosphatase receptor type S	GO:0099054	presynapse assembly (GO:0099054)	BP
PTPRS	male-amplifier	protein tyrosine phosphatase receptor type S	GO:0099151	regulation of postsynaptic density assembly (GO:0099151)	BP
YWHAZ	male-amplifier	tyrosine 3-monooxygenase/tryptophan 5-monooxygenase activation protein zeta	GO:0090128	regulation of synapse maturation (GO:0090128)	BP
SHISA6	male-amplifier	shisa family member 6	GO:0098970	postsynaptic neurotransmitter receptor diffusion trapping (GO:0098970)	BP
SHISA6	male-amplifier	shisa family member 6	GO:0098962	regulation of postsynaptic neurotransmitter receptor activity (GO:0098962)	BP
YWHAZ	male-amplifier	tyrosine 3-monooxygenase/tryptophan 5-monooxygenase activation protein zeta	GO:0008039	synaptic target recognition (GO:0008039)	BP
DNAJC5	male-amplifier	DnaJ heat shock protein family (Hsp40) member C5	SYNGO:presyn_chaperoneProteinFolding	presynaptic chaperone-mediated protein folding	BP
HSPA8	male-amplifier	heat shock protein family A (Hsp70) member 8	SYNGO:presyn_chaperoneProteinFolding	presynaptic chaperone-mediated protein folding	BP
SLC6A6	male-amplifier	solute carrier family 6 member 6	GO:0050804	modulation of chemical synaptic transmission (GO:0050804)	BP
PCDH8	male-amplifier	protocadherin 8	GO:0099179	regulation of synaptic membrane adhesion (GO:0099179)	BP
PCDH8	male-amplifier	protocadherin 8	GO:0050804	modulation of chemical synaptic transmission (GO:0050804)	BP
TAOK2	male-amplifier	TAO kinase 2	GO:0099179	regulation of synaptic membrane adhesion (GO:0099179)	BP
MAPK14	male-amplifier	mitogen-activated protein kinase 14	GO:0099179	regulation of synaptic membrane adhesion (GO:0099179)	BP
DLG4	male-amplifier	discs large MAGUK scaffold protein 4	GO:0098919	structural constituent of postsynaptic density (GO:0098919)	BP
GRIN2D	male-amplifier	glutamate ionotropic receptor NMDA type subunit 2D	GO:1904315	transmitter-gated ion channel activity involved in regulation of postsynaptic membrane potential (GO:1904315)	BP
RAB3B	male-amplifier	RAB3B, member RAS oncogene family	GO:0098693	regulation of synaptic vesicle cycle (GO:0098693)	BP
PAK1	male-amplifier	p21 (RAC1) activated kinase 1	GO:0150036	regulation of trans-synaptic signaling by endocannabinoid, modulating synaptic transmission (GO:0150036)	BP
GPC4	male-amplifier	glypican 4	GO:1905606	regulation of presynapse assembly (GO:1905606)	BP
GAPDH	male-amplifier	glyceraldehyde-3-phosphate dehydrogenase	SYNGO:postsyn_ATPmetabolic	ATP metabolic process in the postsynapse	BP
GAPDH	male-amplifier	glyceraldehyde-3-phosphate dehydrogenase	GO:0099162	regulation of synaptic vesicle neurotransmitter loading (GO:0099162)	BP
ABR	male-amplifier	ABR activator of RhoGEF and GTPase	GO:0050804	modulation of chemical synaptic transmission (GO:0050804)	BP
BCR	male-amplifier	BCR activator of RhoGEF and GTPase	GO:0050804	modulation of chemical synaptic transmission (GO:0050804)	BP
DGKZ	male-amplifier	diacylglycerol kinase zeta	GO:0099562	maintenance of postsynaptic density structure (GO:0099562)	BP
TANC1	male-amplifier	tetratricopeptide repeat, ankyrin repeat and coiled-coil containing 1	GO:0099175	regulation of postsynapse organization (GO:0099175)	BP
TSC2	male-amplifier	TSC complex subunit 2	GO:0099175	regulation of postsynapse organization (GO:0099175)	BP
CACNB2	male-amplifier	calcium voltage-gated channel auxiliary subunit beta 2	GO:0099626	voltage-gated calcium channel activity involved in regulation of presynaptic cytosolic calcium levels (GO:0099626)	BP
CDK5	male-amplifier	cyclin dependent kinase 5	GO:1905806	regulation of synapse disassembly (GO:1905806)	BP
PAK1	male-amplifier	p21 (RAC1) activated kinase 1	GO:0098696	regulation of neurotransmitter receptor localization to postsynaptic specialization membrane (GO:0098696)	BP
PAK1	male-amplifier	p21 (RAC1) activated kinase 1	GO:0098696	regulation of neurotransmitter receptor localization to postsynaptic specialization membrane (GO:0098696)	BP
STAU1	male-amplifier	staufen double-stranded RNA binding protein 1	GO:0098963	dendritic transport of messenger ribonucleoprotein complex (GO:0098963)	BP
PLS3	male-amplifier	plastin 3	GO:0098693	regulation of synaptic vesicle cycle (GO:0098693)	BP
EPHA4	male-amplifier	EPH receptor A4	GO:1905806	regulation of synapse disassembly (GO:1905806)	BP
GPC4	male-amplifier	glypican 4	GO:0099560	synapse adhesion between pre- and post-synapse (GO:0099560)	BP
PTPRS	male-amplifier	protein tyrosine phosphatase receptor type S	GO:0099560	synapse adhesion between pre- and post-synapse (GO:0099560)	BP
PTPRS	male-amplifier	protein tyrosine phosphatase receptor type S	GO:0099560	synapse adhesion between pre- and post-synapse (GO:0099560)	BP
PTPRS	male-amplifier	protein tyrosine phosphatase receptor type S	GO:0099560	synapse adhesion between pre- and post-synapse (GO:0099560)	BP
GRIA4	male-amplifier	glutamate ionotropic receptor AMPA type subunit 4	GO:1904315	transmitter-gated ion channel activity involved in regulation of postsynaptic membrane potential (GO:1904315)	BP
CACNG2	male-amplifier	calcium voltage-gated channel auxiliary subunit gamma 2	GO:0099072	regulation of postsynaptic membrane neurotransmitter receptor levels (GO:0099072)	BP
DRD3	male-amplifier	dopamine receptor D3	GO:0099149	regulation of postsynaptic neurotransmitter receptor endocytosis (GO:0099149)	BP
DRD3	male-amplifier	dopamine receptor D3	GO:0051580	regulation of neurotransmitter uptake (GO:0051580)	BP
NRGN	male-amplifier	neurogranin	GO:0099170	postsynaptic modulation of chemical synaptic transmission (GO:0099170)	BP
YWHAH	male-amplifier	tyrosine 3-monooxygenase/tryptophan 5-monooxygenase activation protein eta	GO:0099171	presynaptic modulation of chemical synaptic transmission (GO:0099171)	BP
GHRL	male-amplifier	ghrelin and obestatin prepropeptide	GO:0099170	postsynaptic modulation of chemical synaptic transmission (GO:0099170)	BP
GHRL	male-amplifier	ghrelin and obestatin prepropeptide	GO:0099175	regulation of postsynapse organization (GO:0099175)	BP
SACM1L	male-amplifier	SAC1 like phosphatidylinositide phosphatase	GO:0098969	neurotransmitter receptor transport to postsynaptic membrane (GO:0098969)	BP
DLG3	male-amplifier	discs large MAGUK scaffold protein 3	GO:0099072	regulation of postsynaptic membrane neurotransmitter receptor levels (GO:0099072)	BP
DLG2	male-amplifier	discs large MAGUK scaffold protein 2	GO:0099645	neurotransmitter receptor localization to postsynaptic specialization membrane (GO:0099645)	BP
GPC6	male-amplifier	glypican 6	GO:0098696	regulation of neurotransmitter receptor localization to postsynaptic specialization membrane (GO:0098696)	BP
ITGB1	male-amplifier	integrin subunit beta 1	GO:0050804	modulation of chemical synaptic transmission (GO:0050804)	BP
ITGB3	male-amplifier	integrin subunit beta 3	GO:0099149	regulation of postsynaptic neurotransmitter receptor endocytosis (GO:0099149)	BP
SLITRK2	male-amplifier	SLIT and NTRK like family member 2	GO:0099560	synapse adhesion between pre- and post-synapse (GO:0099560)	BP
SLITRK2	male-amplifier	SLIT and NTRK like family member 2	GO:1905606	regulation of presynapse assembly (GO:1905606)	BP
SLITRK4	male-amplifier	SLIT and NTRK like family member 4	GO:0050807	regulation of synapse organization (GO:0050807)	BP
SLITRK2	male-amplifier	SLIT and NTRK like family member 2	GO:0050807	regulation of synapse organization (GO:0050807)	BP
VPS18	male-amplifier	VPS18 core subunit of CORVET and HOPS complexes	GO:2000300	regulation of synaptic vesicle exocytosis (GO:2000300)	BP
FAM108A1	male-amplifier	abhydrolase domain containing 17A, depalmitoylase	GO:0099175	regulation of postsynapse organization (GO:0099175)	BP
FAM108C1	male-amplifier	abhydrolase domain containing 17C, depalmitoylase	GO:0099175	regulation of postsynapse organization (GO:0099175)	BP
DLG1	male-amplifier	discs large MAGUK scaffold protein 1	GO:0099645	neurotransmitter receptor localization to postsynaptic specialization membrane (GO:0099645)	BP
DLG4	male-amplifier	discs large MAGUK scaffold protein 4	GO:0099645	neurotransmitter receptor localization to postsynaptic specialization membrane (GO:0099645)	BP
CACNG8	male-amplifier	calcium voltage-gated channel auxiliary subunit gamma 8	GO:0099072	regulation of postsynaptic membrane neurotransmitter receptor levels (GO:0099072)	BP
PTPRS	male-amplifier	protein tyrosine phosphatase receptor type S	GO:0050804	modulation of chemical synaptic transmission (GO:0050804)	BP
SORCS3	male-amplifier	sortilin related VPS10 domain containing receptor 3	GO:0099170	postsynaptic modulation of chemical synaptic transmission (GO:0099170)	BP
VHL	male-amplifier	von Hippel-Lindau tumor suppressor	GO:0099175	regulation of postsynapse organization (GO:0099175)	BP
VHL	male-amplifier	von Hippel-Lindau tumor suppressor	GO:0140252	regulation protein catabolic process at postsynapse (GO:0140252)	BP
ABL2	male-amplifier	ABL proto-oncogene 2, non-receptor tyrosine kinase	GO:0060074	synapse maturation (GO:0060074)	BP
ABL1	male-amplifier	ABL proto-oncogene 1, non-receptor tyrosine kinase	GO:0099150	regulation of postsynaptic specialization assembly (GO:0099150)	BP
GPC4	male-amplifier	glypican 4	GO:0098696	regulation of neurotransmitter receptor localization to postsynaptic specialization membrane (GO:0098696)	BP
VTI1A	male-amplifier	vesicle transport through interaction with t-SNAREs 1A	GO:0016189	synaptic vesicle to endosome fusion (GO:0016189)	BP
CACNG2	male-amplifier	calcium voltage-gated channel auxiliary subunit gamma 2	GO:0098970	postsynaptic neurotransmitter receptor diffusion trapping (GO:0098970)	BP
ASAP1	male-amplifier	ArfGAP with SH3 domain, ankyrin repeat and PH domain 1	GO:0099175	regulation of postsynapse organization (GO:0099175)	BP
DLG1	male-amplifier	discs large MAGUK scaffold protein 1	GO:0098919	structural constituent of postsynaptic density (GO:0098919)	BP
DLG3	male-amplifier	discs large MAGUK scaffold protein 3	GO:0098919	structural constituent of postsynaptic density (GO:0098919)	BP
DLG2	male-amplifier	discs large MAGUK scaffold protein 2	GO:0098919	structural constituent of postsynaptic density (GO:0098919)	BP
CACNG2	male-amplifier	calcium voltage-gated channel auxiliary subunit gamma 2	GO:0099645	neurotransmitter receptor localization to postsynaptic specialization membrane (GO:0099645)	BP
PPFIA3	male-amplifier	PTPRF interacting protein alpha 3	GO:0016079	synaptic vesicle exocytosis (GO:0016079)	BP
PPFIA3	male-amplifier	PTPRF interacting protein alpha 3	GO:0016081	synaptic vesicle docking (GO:0016081)	BP
DLG1	male-amplifier	discs large MAGUK scaffold protein 1	GO:0099645	neurotransmitter receptor localization to postsynaptic specialization membrane (GO:0099645)	BP
PTPRS	male-amplifier	protein tyrosine phosphatase receptor type S	GO:0050808	synapse organization (GO:0050808)	BP
NRXN1	male-amplifier	neurexin 1	GO:0099560	synapse adhesion between pre- and post-synapse (GO:0099560)	BP
NRXN1	male-amplifier	neurexin 1	GO:0099054	presynapse assembly (GO:0099054)	BP
NRXN1	male-amplifier	neurexin 1	GO:1905606	regulation of presynapse assembly (GO:1905606)	BP
MDGA1	male-amplifier	MAM domain containing glycosylphosphatidylinositol anchor 1	GO:1905606	regulation of presynapse assembly (GO:1905606)	BP
NRXN1	male-amplifier	neurexin 1	GO:0099150	regulation of postsynaptic specialization assembly (GO:0099150)	BP
SEMA3F	male-amplifier	semaphorin 3F	GO:0099175	regulation of postsynapse organization (GO:0099175)	BP
NLGN3	male-amplifier	neuroligin 3	GO:0098698	postsynaptic specialization assembly (GO:0098698)	BP
PLEKHG5	male-amplifier	pleckstrin homology and RhoGEF domain containing G5	GO:0140251	regulation protein catabolic process at presynapse (GO:0140251)	BP
NRG1	male-amplifier	neuregulin 1	GO:0099527	postsynapse to nucleus signaling pathway (GO:0099527)	BP
NRG1	male-amplifier	neuregulin 1	GO:0099149	regulation of postsynaptic neurotransmitter receptor endocytosis (GO:0099149)	BP
NRG1	male-amplifier	neuregulin 1	GO:0099560	synapse adhesion between pre- and post-synapse (GO:0099560)	BP
CNKSR2	male-amplifier	connector enhancer of kinase suppressor of Ras 2	GO:0099173	postsynapse organization (GO:0099173)	BP
ARHGEF7	male-amplifier	Rho guanine nucleotide exchange factor 7	GO:0099140	presynaptic actin cytoskeleton organization (GO:0099140)	BP
ARHGEF7	male-amplifier	Rho guanine nucleotide exchange factor 7	GO:0098974	postsynaptic actin cytoskeleton organization (GO:0098974)	BP
RAC1	male-amplifier	Rac family small GTPase 1	GO:0098974	postsynaptic actin cytoskeleton organization (GO:0098974)	BP
WNT5A	male-amplifier	Wnt family member 5A	GO:0050807	regulation of synapse organization (GO:0050807)	BP
FZD1	male-amplifier	frizzled class receptor 1	GO:1905606	regulation of presynapse assembly (GO:1905606)	BP
FZD9	male-amplifier	frizzled class receptor 9	GO:0099173	postsynapse organization (GO:0099173)	BP
WNT5A	male-amplifier	Wnt family member 5A	GO:0099175	regulation of postsynapse organization (GO:0099175)	BP
WNT5A	male-amplifier	Wnt family member 5A	GO:0099566	regulation of postsynaptic cytosolic calcium levels (GO:0099566)	BP
FZD9	male-amplifier	frizzled class receptor 9	GO:0099566	regulation of postsynaptic cytosolic calcium levels (GO:0099566)	BP
DVL1	male-amplifier	dishevelled segment polarity protein 1	GO:2000300	regulation of synaptic vesicle exocytosis (GO:2000300)	BP
DVL1	male-amplifier	dishevelled segment polarity protein 1	GO:0099173	postsynapse organization (GO:0099173)	BP
KIAA1688	male-amplifier	Rho GTPase activating protein 39	GO:0099173	postsynapse organization (GO:0099173)	BP
FRMPD4	male-amplifier	FERM and PDZ domain containing 4	GO:0098974	postsynaptic actin cytoskeleton organization (GO:0098974)	BP
CLSTN1	male-amplifier	calsyntenin 1	GO:0098969	neurotransmitter receptor transport to postsynaptic membrane (GO:0098969)	BP
CLSTN1	male-amplifier	calsyntenin 1	GO:0090128	regulation of synapse maturation (GO:0090128)	BP
RGS7	male-amplifier	regulator of G protein signaling 7	GO:0060078	regulation of postsynaptic membrane potential (GO:0060078)	BP
MDGA1	male-amplifier	MAM domain containing glycosylphosphatidylinositol anchor 1	GO:0099179	regulation of synaptic membrane adhesion (GO:0099179)	BP
TRIO	male-amplifier	trio Rho guanine nucleotide exchange factor	GO:0099170	postsynaptic modulation of chemical synaptic transmission (GO:0099170)	BP
GPER	male-amplifier	G protein-coupled estrogen receptor 1	GO:0050804	modulation of chemical synaptic transmission (GO:0050804)	BP
RAPGEF4	male-amplifier	Rap guanine nucleotide exchange factor 4	GO:0098696	regulation of neurotransmitter receptor localization to postsynaptic specialization membrane (GO:0098696)	BP
RAPGEF4	male-amplifier	Rap guanine nucleotide exchange factor 4	GO:0099175	regulation of postsynapse organization (GO:0099175)	BP
RAPGEF4	male-amplifier	Rap guanine nucleotide exchange factor 4	GO:0098693	regulation of synaptic vesicle cycle (GO:0098693)	BP
AP2M1	male-amplifier	adaptor related protein complex 2 subunit mu 1	GO:0098884	postsynaptic neurotransmitter receptor endocytosis (GO:0098884)	BP
HSPA8	male-amplifier	heat shock protein family A (Hsp70) member 8	GO:0099175	regulation of postsynapse organization (GO:0099175)	BP
ACTN1	male-amplifier	actinin alpha 1	GO:0099186	structural constituent of postsynapse (GO:0099186)	BP
OPHN1	male-amplifier	oligophrenin 1	GO:0099149	regulation of postsynaptic neurotransmitter receptor endocytosis (GO:0099149)	BP
DNM1	male-amplifier	dynamin 1	GO:0050804	modulation of chemical synaptic transmission (GO:0050804)	BP
DNM3	male-amplifier	dynamin 3	GO:0099186	structural constituent of postsynapse (GO:0099186)	BP
EPS15	male-amplifier	epidermal growth factor receptor pathway substrate 15	GO:0098884	postsynaptic neurotransmitter receptor endocytosis (GO:0098884)	BP
MYH10	male-amplifier	myosin heavy chain 10	GO:0098974	postsynaptic actin cytoskeleton organization (GO:0098974)	BP
PIP5K1C	male-amplifier	phosphatidylinositol-4-phosphate 5-kinase type 1 gamma	GO:0099149	regulation of postsynaptic neurotransmitter receptor endocytosis (GO:0099149)	BP
HSPA8	male-amplifier	heat shock protein family A (Hsp70) member 8	GO:0098880	maintenance of postsynaptic specialization structure (GO:0098880)	BP
OPHN1	male-amplifier	oligophrenin 1	GO:0098880	maintenance of postsynaptic specialization structure (GO:0098880)	BP
STK38L	male-amplifier	serine/threonine kinase 38 like	GO:0099173	postsynapse organization (GO:0099173)	BP
NUMB	male-amplifier	NUMB endocytic adaptor protein	GO:0099149	regulation of postsynaptic neurotransmitter receptor endocytosis (GO:0099149)	BP
NUMB	male-amplifier	NUMB endocytic adaptor protein	GO:0150052	regulation of postsynapse assembly (GO:0150052)	BP
CLPTM1	male-amplifier	CLPTM1 regulator of GABA type A receptor forward trafficking	GO:0099072	regulation of postsynaptic membrane neurotransmitter receptor levels (GO:0099072)	BP
LHFPL4	male-amplifier	LHFPL tetraspan subfamily member 4	GO:0099645	neurotransmitter receptor localization to postsynaptic specialization membrane (GO:0099645)	BP
SRCIN1	male-amplifier	SRC kinase signaling inhibitor 1	GO:0051963	regulation of synapse assembly (GO:0051963)	BP
SRCIN1	male-amplifier	SRC kinase signaling inhibitor 1	GO:0098974	postsynaptic actin cytoskeleton organization (GO:0098974)	BP
ZDHHC5	male-amplifier	zinc finger DHHC-type palmitoyltransferase 5	GO:0099072	regulation of postsynaptic membrane neurotransmitter receptor levels (GO:0099072)	BP
SH3GLB2	male-amplifier	SH3 domain containing GRB2 like, endophilin B2	GO:0098884	postsynaptic neurotransmitter receptor endocytosis (GO:0098884)	BP
SEPT7	male-amplifier	septin 7	GO:0099186	structural constituent of postsynapse (GO:0099186)	BP
TAOK2	male-amplifier	TAO kinase 2	GO:0099175	regulation of postsynapse organization (GO:0099175)	BP
RAP1B	male-amplifier	RAP1B, member of RAS oncogene family	GO:0099010	modification of postsynaptic structure (GO:0099010)	BP
WNT5A	male-amplifier	Wnt family member 5A	GO:0099170	postsynaptic modulation of chemical synaptic transmission (GO:0099170)	BP
DVL1	male-amplifier	dishevelled segment polarity protein 1	GO:0099175	regulation of postsynapse organization (GO:0099175)	BP
CTBP2	male-amplifier	C-terminal binding protein 2	GO:0098882	structural constituent of active zone (GO:0098882)	BP
DLG5	male-amplifier	discs large MAGUK scaffold protein 5	GO:0099173	postsynapse organization (GO:0099173)	BP
CDC42	male-amplifier	cell division cycle 42	GO:0099175	regulation of postsynapse organization (GO:0099175)	BP
COMT	male-amplifier	catechol-O-methyltransferase	GO:0042135	neurotransmitter catabolic process (GO:0042135)	BP
STAU2	male-amplifier	staufen double-stranded RNA binding protein 2	GO:0098964	anterograde dendritic transport of messenger ribonucleoprotein complex (GO:0098964)	BP
PRKACA	male-amplifier	protein kinase cAMP-activated catalytic subunit alpha	GO:0099170	postsynaptic modulation of chemical synaptic transmission (GO:0099170)	BP
LAMB2	male-amplifier	laminin subunit beta 2	GO:0150043	structural constituent of synapse-associated extracellular matrix (GO:0150043)	BP
HIP1R	male-amplifier	huntingtin interacting protein 1 related	GO:0099173	postsynapse organization (GO:0099173)	BP
C1QL3	male-amplifier	complement C1q like 3	GO:0099645	neurotransmitter receptor localization to postsynaptic specialization membrane (GO:0099645)	BP
ARRB2	male-amplifier	arrestin beta 2	GO:0098926	postsynaptic signaling pathway (GO:0098926)	BP
ARRB2	male-amplifier	arrestin beta 2	GO:0050804	modulation of chemical synaptic transmission (GO:0050804)	BP
AKT1	male-amplifier	AKT serine/threonine kinase 1	GO:0099175	regulation of postsynapse organization (GO:0099175)	BP
WNT5A	male-amplifier	Wnt family member 5A	GO:0150045	regulation of synaptic signaling by nitric oxide (GO:0150045)	BP
WNT5A	male-amplifier	Wnt family member 5A	GO:0099150	regulation of postsynaptic specialization assembly (GO:0099150)	BP
MARK2	male-amplifier	microtubule affinity regulating kinase 2	GO:0099175	regulation of postsynapse organization (GO:0099175)	BP
NF1	male-amplifier	neurofibromin 1	GO:0098926	postsynaptic signaling pathway (GO:0098926)	BP
NF1	male-amplifier	neurofibromin 1	GO:0099175	regulation of postsynapse organization (GO:0099175)	BP
NF1	male-amplifier	neurofibromin 1	GO:0099159	regulation of modification of postsynaptic structure (GO:0099159)	BP
WNT5A	male-amplifier	Wnt family member 5A	GO:0050804	modulation of chemical synaptic transmission (GO:0050804)	BP
ROR2	male-amplifier	receptor tyrosine kinase like orphan receptor 2	GO:0150045	regulation of synaptic signaling by nitric oxide (GO:0150045)	BP
ROR2	male-amplifier	receptor tyrosine kinase like orphan receptor 2	GO:0050804	modulation of chemical synaptic transmission (GO:0050804)	BP
ROR2	male-amplifier	receptor tyrosine kinase like orphan receptor 2	GO:0099175	regulation of postsynapse organization (GO:0099175)	BP
C1QL3	male-amplifier	complement C1q like 3	GO:0097107	postsynaptic density assembly (GO:0097107)	BP
ITGB3	male-amplifier	integrin subunit beta 3	GO:0150054	regulation of postsynaptic neurotransmitter receptor diffusion trapping (GO:0150054)	BP
ITGB3	male-amplifier	integrin subunit beta 3	GO:0098880	maintenance of postsynaptic specialization structure (GO:0098880)	BP
ITGB1	male-amplifier	integrin subunit beta 1	GO:0098880	maintenance of postsynaptic specialization structure (GO:0098880)	BP
ITGB1	male-amplifier	integrin subunit beta 1	GO:0150054	regulation of postsynaptic neurotransmitter receptor diffusion trapping (GO:0150054)	BP
PLXND1	male-amplifier	plexin D1	GO:0008039	synaptic target recognition (GO:0008039)	BP
GAD1	male-amplifier	glutamate decarboxylase 1	GO:0042136	neurotransmitter biosynthetic process (GO:0042136)	BP
GRN	male-amplifier	granulin precursor	GO:0099558	maintenance of synapse structure (GO:0099558)	BP
ITGB1	male-amplifier	integrin subunit beta 1	GO:1905806	regulation of synapse disassembly (GO:1905806)	BP
SORT1	male-amplifier	sortilin 1	GO:0099558	maintenance of synapse structure (GO:0099558)	BP
RPL10	male-amplifier	ribosomal protein L10	GO:0140236	translation at presynapse (GO:0140236)	BP
RPL18	male-amplifier	ribosomal protein L18	GO:0140236	translation at presynapse (GO:0140236)	BP
RPL29	male-amplifier	ribosomal protein L29	GO:0140236	translation at presynapse (GO:0140236)	BP
RPL35A	male-amplifier	ribosomal protein L35a	GO:0140236	translation at presynapse (GO:0140236)	BP
RPS12	male-amplifier	ribosomal protein S12	GO:0140236	translation at presynapse (GO:0140236)	BP
RPS24	male-amplifier	ribosomal protein S24	GO:0140236	translation at presynapse (GO:0140236)	BP
RPL10	male-amplifier	ribosomal protein L10	GO:0140242	translation at postsynapse (GO:0140242)	BP
RPL18	male-amplifier	ribosomal protein L18	GO:0140242	translation at postsynapse (GO:0140242)	BP
RPL22	male-amplifier	ribosomal protein L22	GO:0140242	translation at postsynapse (GO:0140242)	BP
RPL29	male-amplifier	ribosomal protein L29	GO:0140242	translation at postsynapse (GO:0140242)	BP
RPL35A	male-amplifier	ribosomal protein L35a	GO:0140242	translation at postsynapse (GO:0140242)	BP
RPS12	male-amplifier	ribosomal protein S12	GO:0140242	translation at postsynapse (GO:0140242)	BP
RPS24	male-amplifier	ribosomal protein S24	GO:0140242	translation at postsynapse (GO:0140242)	BP
MAPK3	male-amplifier	mitogen-activated protein kinase 3	GO:0050804	modulation of chemical synaptic transmission (GO:0050804)	BP
EXOC2	male-amplifier	exocyst complex component 2	GO:0099641	anterograde axonal protein transport (GO:0099641)	BP
CACNA1B	male-amplifier	calcium voltage-gated channel subunit alpha1 B	GO:0150037	regulation of calcium-dependent activation of synaptic vesicle fusion (GO:0150037)	BP
RNF216	male-amplifier	ring finger protein 216	GO:0099149	regulation of postsynaptic neurotransmitter receptor endocytosis (GO:0099149)	BP
ITSN1	male-amplifier	intersectin 1	GO:0099175	regulation of postsynapse organization (GO:0099175)	BP
SYNGAP1	male-amplifier	synaptic Ras GTPase activating protein 1	GO:0050804	modulation of chemical synaptic transmission (GO:0050804)	BP
SHANK3	male-amplifier	SH3 and multiple ankyrin repeat domains 3	GO:0050804	modulation of chemical synaptic transmission (GO:0050804)	BP
BAIAP2	male-amplifier	BAR/IMD domain containing adaptor protein 2	GO:0099175	regulation of postsynapse organization (GO:0099175)	BP
DLGAP2	male-amplifier	DLG associated protein 2	GO:0050804	modulation of chemical synaptic transmission (GO:0050804)	BP
TIAM1	male-amplifier	TIAM Rac1 associated GEF 1	GO:0099175	regulation of postsynapse organization (GO:0099175)	BP
RICH2	male-amplifier	Rho GTPase activating protein 44	GO:0050804	modulation of chemical synaptic transmission (GO:0050804)	BP
WASF2	male-amplifier	WASP family member 2	GO:0099173	postsynapse organization (GO:0099173)	BP
CTTN	male-amplifier	cortactin	GO:0099010	modification of postsynaptic structure (GO:0099010)	BP
ERC2	male-amplifier	ELKS/RAB6-interacting/CAST family member 2	GO:0099509	regulation of presynaptic cytosolic calcium levels (GO:0099509)	BP
ERC2	male-amplifier	ELKS/RAB6-interacting/CAST family member 2	GO:0150037	regulation of calcium-dependent activation of synaptic vesicle fusion (GO:0150037)	BP
CAMK2B	male-amplifier	calcium/calmodulin dependent protein kinase II beta	GO:0090128	regulation of synapse maturation (GO:0090128)	BP
IQSEC1	male-amplifier	IQ motif and Sec7 domain ArfGEF 1	GO:0099170	postsynaptic modulation of chemical synaptic transmission (GO:0099170)	BP
SYNPO	male-amplifier	synaptopodin	GO:0099170	postsynaptic modulation of chemical synaptic transmission (GO:0099170)	BP
ERC2	male-amplifier	ELKS/RAB6-interacting/CAST family member 2	GO:0016082	synaptic vesicle priming (GO:0016082)	BP
BSN	male-amplifier	bassoon presynaptic cytomatrix protein	GO:0097091	synaptic vesicle clustering (GO:0097091)	BP
BIN1	male-amplifier	bridging integrator 1	GO:0048488	synaptic vesicle endocytosis (GO:0048488)	BP
BIN1	male-amplifier	bridging integrator 1	GO:0048488	synaptic vesicle endocytosis (GO:0048488)	BP
BTBD9	male-amplifier	BTB domain containing 9	GO:0050804	modulation of chemical synaptic transmission (GO:0050804)	BP
OPHN1	male-amplifier	oligophrenin 1	GO:1900242	regulation of synaptic vesicle endocytosis (GO:1900242)	BP
PAFAH1B1	male-amplifier	platelet activating factor acetylhydrolase 1b regulatory subunit 1	GO:0050804	modulation of chemical synaptic transmission (GO:0050804)	BP
PAFAH1B1	male-amplifier	platelet activating factor acetylhydrolase 1b regulatory subunit 1	GO:0099175	regulation of postsynapse organization (GO:0099175)	BP
ERBB2	male-amplifier	erb-b2 receptor tyrosine kinase 2	GO:0099645	neurotransmitter receptor localization to postsynaptic specialization membrane (GO:0099645)	BP
IGF1	male-amplifier	insulin like growth factor 1	GO:0099170	postsynaptic modulation of chemical synaptic transmission (GO:0099170)	BP
IGF1R	male-amplifier	insulin like growth factor 1 receptor	GO:0099170	postsynaptic modulation of chemical synaptic transmission (GO:0099170)	BP
AGAP3	male-amplifier	ArfGAP with GTPase domain, ankyrin repeat and PH domain 3	GO:0099072	regulation of postsynaptic membrane neurotransmitter receptor levels (GO:0099072)	BP
NETO1	male-amplifier	neuropilin and tolloid like 1	GO:0140231	anterograde axonal transport of neurotransmitter receptor complex (GO:0140231)	BP
CHD4	male-amplifier	chromodomain helicase DNA binding protein 4	GO:0051963	regulation of synapse assembly (GO:0051963)	BP
PTK2	male-amplifier	protein tyrosine kinase 2	GO:1905274	regulation of modification of postsynaptic actin cytoskeleton (GO:1905274)	BP
PTK2B	male-amplifier	protein tyrosine kinase 2 beta	GO:0099170	postsynaptic modulation of chemical synaptic transmission (GO:0099170)	BP
PTK2B	male-amplifier	protein tyrosine kinase 2 beta	GO:0099151	regulation of postsynaptic density assembly (GO:0099151)	BP
NETO1	male-amplifier	neuropilin and tolloid like 1	GO:0099645	neurotransmitter receptor localization to postsynaptic specialization membrane (GO:0099645)	BP
NETO1	male-amplifier	neuropilin and tolloid like 1	GO:0098962	regulation of postsynaptic neurotransmitter receptor activity (GO:0098962)	BP
LAMA5	male-amplifier	laminin subunit alpha 5	GO:0099173	postsynapse organization (GO:0099173)	BP
TSC2	male-amplifier	TSC complex subunit 2	GO:0099175	regulation of postsynapse organization (GO:0099175)	BP
AP2M1	male-amplifier	adaptor related protein complex 2 subunit mu 1	GO:0048488	synaptic vesicle endocytosis (GO:0048488)	BP
TRIO	male-amplifier	trio Rho guanine nucleotide exchange factor	GO:0050804	modulation of chemical synaptic transmission (GO:0050804)	BP
MAPK8	male-amplifier	mitogen-activated protein kinase 8	GO:0050804	modulation of chemical synaptic transmission (GO:0050804)	BP
SYNPR	male-amplifier	synaptoporin	GO:0050804	modulation of chemical synaptic transmission (GO:0050804)	BP
RALA	male-amplifier	RAS like proto-oncogene A	GO:0099149	regulation of postsynaptic neurotransmitter receptor endocytosis (GO:0099149)	BP
SCRN1	male-amplifier	secernin 1	GO:0098693	regulation of synaptic vesicle cycle (GO:0098693)	BP
ANO6	male-amplifier	anoctamin 6	GO:0060078	regulation of postsynaptic membrane potential (GO:0060078)	BP
RTN4	male-amplifier	reticulon 4	GO:0050804	modulation of chemical synaptic transmission (GO:0050804)	BP
NRXN1	male-amplifier	neurexin 1	GO:0007416	synapse assembly (GO:0007416)	BP
PTPN23	male-amplifier	protein tyrosine phosphatase non-receptor type 23	GO:0099161	regulation of presynaptic dense core vesicle exocytosis (GO:0099161)	BP
DNM1	male-amplifier	dynamin 1	GO:0099525	presynaptic dense core vesicle exocytosis (GO:0099525)	BP
DNM2	male-amplifier	dynamin 2	GO:0099525	presynaptic dense core vesicle exocytosis (GO:0099525)	BP
DNM3	male-amplifier	dynamin 3	GO:0099525	presynaptic dense core vesicle exocytosis (GO:0099525)	BP
PRKCE	male-amplifier	protein kinase C epsilon	GO:0099161	regulation of presynaptic dense core vesicle exocytosis (GO:0099161)	BP
RAB5C	male-amplifier	RAB5C, member RAS oncogene family	GO:0099525	presynaptic dense core vesicle exocytosis (GO:0099525)	BP
EVI5L	male-amplifier	ecotropic viral integration site 5 like	GO:0099161	regulation of presynaptic dense core vesicle exocytosis (GO:0099161)	BP
TBC1D2	male-amplifier	TBC1 domain family member 2	GO:0099161	regulation of presynaptic dense core vesicle exocytosis (GO:0099161)	BP
ROCK2	male-amplifier	Rho associated coiled-coil containing protein kinase 2	GO:0090128	regulation of synapse maturation (GO:0090128)	BP
NRXN2	male-amplifier	neurexin 2	GO:0098962	regulation of postsynaptic neurotransmitter receptor activity (GO:0098962)	BP
ICAM5	male-amplifier	intercellular adhesion molecule 5	GO:0051963	regulation of synapse assembly (GO:0051963)	BP
VAC14	male-amplifier	VAC14 component of PIKFYVE complex	GO:0099149	regulation of postsynaptic neurotransmitter receptor endocytosis (GO:0099149)	BP
SNX9	male-amplifier	sorting nexin 9	GO:1900242	regulation of synaptic vesicle endocytosis (GO:1900242)	BP
CTBP1	male-amplifier	C-terminal binding protein 1	GO:0048488	synaptic vesicle endocytosis (GO:0048488)	BP
CTBP1	male-amplifier	C-terminal binding protein 1	GO:0097091	synaptic vesicle clustering (GO:0097091)	BP
CD2AP	male-amplifier	CD2 associated protein	GO:0050808	synapse organization (GO:0050808)	BP
TBC1D24	male-amplifier	TBC1 domain family member 24	GO:0099532	synaptic vesicle endosomal processing (GO:0099532)	BP
VPS18	male-amplifier	VPS18 core subunit of CORVET and HOPS complexes	GO:0098693	regulation of synaptic vesicle cycle (GO:0098693)	BP
PPFIA1	male-amplifier	PTPRF interacting protein alpha 1	GO:0099072	regulation of postsynaptic membrane neurotransmitter receptor levels (GO:0099072)	BP
CNTNAP1	male-amplifier	contactin associated protein 1	GO:0090128	regulation of synapse maturation (GO:0090128)	BP
PTPRS	male-amplifier	protein tyrosine phosphatase receptor type S	GO:0099537	trans-synaptic signaling (GO:0099537)	BP
ATP6V0D1	male-amplifier	ATPase H+ transporting V0 subunit d1	GO:0097401	synaptic vesicle proton loading (GO:0097401)	BP
SACM1L	male-amplifier	SAC1 like phosphatidylinositide phosphatase	GO:0098967	exocytic insertion of neurotransmitter receptor to postsynaptic membrane (GO:0098967)	BP
AAK1	male-amplifier	AP2 associated kinase 1	GO:0140238	presynaptic endocytosis (GO:0140238)	BP
AAK1	male-amplifier	AP2 associated kinase 1	GO:0140238	presynaptic endocytosis (GO:0140238)	BP
CACNA1A	male-amplifier	calcium voltage-gated channel subunit alpha1 A	GO:0099626	voltage-gated calcium channel activity involved in regulation of presynaptic cytosolic calcium levels (GO:0099626)	BP
CD44	male-amplifier	CD44 molecule (Indian blood group)	GO:0099173	postsynapse organization (GO:0099173)	BP
CD44	male-amplifier	CD44 molecule (Indian blood group)	GO:0099159	regulation of modification of postsynaptic structure (GO:0099159)	BP
SIPA1L2	male-amplifier	signal induced proliferation associated 1 like 2	GO:0098928	presynaptic signaling pathway (GO:0098928)	BP
DIP2A	male-amplifier	disco interacting protein 2 homolog A	GO:1905274	regulation of modification of postsynaptic actin cytoskeleton (GO:1905274)	BP
ROBO2	male-amplifier	roundabout guidance receptor 2	GO:0060074	synapse maturation (GO:0060074)	BP
ODZ4	male-amplifier	teneurin transmembrane protein 4	GO:0099560	synapse adhesion between pre- and post-synapse (GO:0099560)	BP
EXOC4	male-amplifier	exocyst complex component 4	GO:0098696	regulation of neurotransmitter receptor localization to postsynaptic specialization membrane (GO:0098696)	BP
NOTCH1	male-amplifier	notch receptor 1	GO:0099565	postsynaptic process involved in chemical synaptic transmission (GO:0099565)	BP
MYLK	male-amplifier	myosin light chain kinase	GO:1900242	regulation of synaptic vesicle endocytosis (GO:1900242)	BP
MYLK	male-amplifier	myosin light chain kinase	GO:0098969	neurotransmitter receptor transport to postsynaptic membrane (GO:0098969)	BP
CALM1	male-amplifier	calmodulin 1	GO:0140238	presynaptic endocytosis (GO:0140238)	BP
CALM3	male-amplifier	calmodulin 3	GO:0140238	presynaptic endocytosis (GO:0140238)	BP
CAPN1	male-amplifier	calpain 1	GO:0140249	protein catabolic process at postsynapse (GO:0140249)	BP
CAPN1	male-amplifier	calpain 1	GO:0140249	protein catabolic process at postsynapse (GO:0140249)	BP
CAPN2	male-amplifier	calpain 2	GO:0140249	protein catabolic process at postsynapse (GO:0140249)	BP
CAPN2	male-amplifier	calpain 2	GO:0048488	synaptic vesicle endocytosis (GO:0048488)	BP
SGIP1	male-amplifier	SH3GL interacting endocytic adaptor 1	GO:0048488	synaptic vesicle endocytosis (GO:0048488)	BP
AGAP1	male-amplifier	ArfGAP with GTPase domain, ankyrin repeat and PH domain 1	GO:0099159	regulation of modification of postsynaptic structure (GO:0099159)	BP
NXPH1	male-amplifier	neurexophilin 1	GO:0050804	modulation of chemical synaptic transmission (GO:0050804)	BP
CACNA2D3	male-amplifier	calcium voltage-gated channel auxiliary subunit alpha2delta 3	GO:0099174	regulation of presynapse organization (GO:0099174)	BP
ZDHHC17	male-amplifier	zinc finger DHHC-type palmitoyltransferase 17	GO:0098987	regulation of modification of synapse structure, modulating synaptic transmission (GO:0098987)	BP
ANK3	male-amplifier	ankyrin 3	GO:0099159	regulation of modification of postsynaptic structure (GO:0099159)	BP
PRICKLE1	male-amplifier	prickle planar cell polarity protein 1	GO:0099151	regulation of postsynaptic density assembly (GO:0099151)	BP
PRICKLE1	male-amplifier	prickle planar cell polarity protein 1	GO:0099562	maintenance of postsynaptic density structure (GO:0099562)	BP
VANGL2	male-amplifier	VANGL planar cell polarity protein 2	GO:1905806	regulation of synapse disassembly (GO:1905806)	BP
OTOF	male-amplifier	otoferlin	GO:0016079	synaptic vesicle exocytosis (GO:0016079)	BP
OTOF	male-amplifier	otoferlin	GO:0016082	synaptic vesicle priming (GO:0016082)	BP
EPB41L1	male-amplifier	erythrocyte membrane protein band 4.1 like 1	GO:0099145	regulation of exocytic insertion of neurotransmitter receptor to postsynaptic membrane (GO:0099145)	BP
GABARAP	male-amplifier	GABA type A receptor-associated protein	GO:0098696	regulation of neurotransmitter receptor localization to postsynaptic specialization membrane (GO:0098696)	BP
DAAM1	male-amplifier	dishevelled associated activator of morphogenesis 1	GO:0099140	presynaptic actin cytoskeleton organization (GO:0099140)	BP
GRASP	male-amplifier	trafficking regulator and scaffold protein tamalin	GO:0099149	regulation of postsynaptic neurotransmitter receptor endocytosis (GO:0099149)	BP
RAB11FIP5	male-amplifier	RAB11 family interacting protein 5	GO:0098884	postsynaptic neurotransmitter receptor endocytosis (GO:0098884)	BP
GPSM2	male-amplifier	G protein signaling modulator 2	GO:0099645	neurotransmitter receptor localization to postsynaptic specialization membrane (GO:0099645)	BP
ATG16L1	male-amplifier	autophagy related 16 like 1	GO:0098930	axonal transport (GO:0098930)	BP
ATG7	male-amplifier	autophagy related 7	GO:0099504	synaptic vesicle cycle (GO:0099504)	BP
RAB11B	male-amplifier	RAB11B, member RAS oncogene family	GO:0099161	regulation of presynaptic dense core vesicle exocytosis (GO:0099161)	BP
SRGAP2	male-amplifier	SLIT-ROBO Rho GTPase activating protein 2	GO:0051963	regulation of synapse assembly (GO:0051963)	BP
MDGA1	male-amplifier	MAM domain containing glycosylphosphatidylinositol anchor 1	GO:0090128	regulation of synapse maturation (GO:0090128)	BP
SYNGR3	male-amplifier	synaptogyrin 3	GO:0010807	regulation of synaptic vesicle priming (GO:0010807)	BP
GNAI2	male-amplifier	G protein subunit alpha i2	GO:0050804	modulation of chemical synaptic transmission (GO:0050804)	BP
DNM2	male-amplifier	dynamin 2	GO:0140239	postsynaptic endocytosis (GO:0140239)	BP
LRP4	male-amplifier	LDL receptor related protein 4	GO:0150052	regulation of postsynapse assembly (GO:0150052)	BP
AP2A2	male-amplifier	adaptor related protein complex 2 subunit alpha 2	GO:0048488	synaptic vesicle endocytosis (GO:0048488)	BP
CRTAC1	male-amplifier	cartilage acidic protein 1	GO:0051963	regulation of synapse assembly (GO:0051963)	BP
LNX1	male-amplifier	ligand of numb-protein X 1	GO:0060074	synapse maturation (GO:0060074)	BP
CBLN4	male-amplifier	cerebellin 4 precursor	GO:0099550	trans-synaptic signaling, modulating synaptic transmission (GO:0099550)	BP
NRXN1	male-amplifier	neurexin 1	GO:0099550	trans-synaptic signaling, modulating synaptic transmission (GO:0099550)	BP
NRXN2	male-amplifier	neurexin 2	GO:0150052	regulation of postsynapse assembly (GO:0150052)	BP
NRXN2	male-amplifier	neurexin 2	GO:0099171	presynaptic modulation of chemical synaptic transmission (GO:0099171)	BP
IGSF21	male-amplifier	immunoglobin superfamily member 21	GO:0099550	trans-synaptic signaling, modulating synaptic transmission (GO:0099550)	BP
RELN	male-amplifier	reelin	GO:0016079	synaptic vesicle exocytosis (GO:0016079)	BP
RELN	male-amplifier	reelin	GO:0090128	regulation of synapse maturation (GO:0090128)	BP
LRP8	male-amplifier	LDL receptor related protein 8	GO:0098962	regulation of postsynaptic neurotransmitter receptor activity (GO:0098962)	BP
NOTCH1	male-amplifier	notch receptor 1	GO:0098962	regulation of postsynaptic neurotransmitter receptor activity (GO:0098962)	BP
INPP4A	male-amplifier	inositol polyphosphate-4-phosphatase type I A	GO:0099072	regulation of postsynaptic membrane neurotransmitter receptor levels (GO:0099072)	BP
ARHGAP12	male-amplifier	Rho GTPase activating protein 12	GO:0150052	regulation of postsynapse assembly (GO:0150052)	BP
LRP1	male-amplifier	LDL receptor related protein 1	GO:0099149	regulation of postsynaptic neurotransmitter receptor endocytosis (GO:0099149)	BP
IGSF11	male-amplifier	immunoglobulin superfamily member 11	GO:0099072	regulation of postsynaptic membrane neurotransmitter receptor levels (GO:0099072)	BP
IGSF11	male-amplifier	immunoglobulin superfamily member 11	GO:0099537	trans-synaptic signaling (GO:0099537)	BP
IGSF11	male-amplifier	immunoglobulin superfamily member 11	GO:1905606	regulation of presynapse assembly (GO:1905606)	BP
ASAM	male-amplifier	CXADR like membrane protein	GO:0099170	postsynaptic modulation of chemical synaptic transmission (GO:0099170)	BP
EIF2C2	male-amplifier	argonaute RISC catalytic component 2	GO:0090128	regulation of synapse maturation (GO:0090128)	BP
ENAH	male-amplifier	ENAH actin regulator	GO:0099188	postsynaptic cytoskeleton organization (GO:0099188)	BP
EEF1A1	male-amplifier	eukaryotic translation elongation factor 1 alpha 1	GO:0099150	regulation of postsynaptic specialization assembly (GO:0099150)	BP
MLLT4	male-amplifier	afadin, adherens junction formation factor	GO:0099084	postsynaptic specialization organization (GO:0099084)	BP
CNKSR2	male-amplifier	connector enhancer of kinase suppressor of Ras 2	GO:0099084	postsynaptic specialization organization (GO:0099084)	BP
MLLT4	male-amplifier	afadin, adherens junction formation factor	GO:0150052	regulation of postsynapse assembly (GO:0150052)	BP
CNKSR2	male-amplifier	connector enhancer of kinase suppressor of Ras 2	GO:0099084	postsynaptic specialization organization (GO:0099084)	BP
MKLN1	male-amplifier	muskelin 1	GO:0098968	neurotransmitter receptor transport postsynaptic membrane to endosome (GO:0098968)	BP
NEURL	male-amplifier	neuralized E3 ubiquitin protein ligase 1	GO:0150052	regulation of postsynapse assembly (GO:0150052)	BP
CPEB3	male-amplifier	cytoplasmic polyadenylation element binding protein 3	GO:0150052	regulation of postsynapse assembly (GO:0150052)	BP
DPYSL2	male-amplifier	dihydropyrimidinase like 2	GO:0150052	regulation of postsynapse assembly (GO:0150052)	BP
CC2D1A	male-amplifier	coiled-coil and C2 domain containing 1A	GO:0150052	regulation of postsynapse assembly (GO:0150052)	BP
ACTN2	male-amplifier	actinin alpha 2	GO:0098973	structural constituent of postsynaptic actin cytoskeleton (GO:0098973)	BP
PDLIM4	male-amplifier	PDZ and LIM domain 4	GO:0099072	regulation of postsynaptic membrane neurotransmitter receptor levels (GO:0099072)	BP
PDLIM5	male-amplifier	PDZ and LIM domain 5	GO:0150052	regulation of postsynapse assembly (GO:0150052)	BP
CNRIP1	male-amplifier	cannabinoid receptor interacting protein 1	GO:0150036	regulation of trans-synaptic signaling by endocannabinoid, modulating synaptic transmission (GO:0150036)	BP
CNR2	male-amplifier	cannabinoid receptor 2	GO:0099553	trans-synaptic signaling by endocannabinoid, modulating synaptic transmission (GO:0099553)	BP
DCX	male-amplifier	doublecortin	GO:0150052	regulation of postsynapse assembly (GO:0150052)	BP
PPP1R9B	male-amplifier	protein phosphatase 1 regulatory subunit 9B	GO:0150052	regulation of postsynapse assembly (GO:0150052)	BP
ELMO1	male-amplifier	engulfment and cell motility 1	GO:0150052	regulation of postsynapse assembly (GO:0150052)	BP
DOCK1	male-amplifier	dedicator of cytokinesis 1	GO:0150052	regulation of postsynapse assembly (GO:0150052)	BP
DOCK4	male-amplifier	dedicator of cytokinesis 4	GO:0150052	regulation of postsynapse assembly (GO:0150052)	BP
DIXDC1	male-amplifier	DIX domain containing 1	GO:0098885	modification of postsynaptic actin cytoskeleton (GO:0098885)	BP
SEPT9	male-amplifier	septin 9	GO:0098971	anterograde dendritic transport of neurotransmitter receptor complex (GO:0098971)	BP
RNF220	male-amplifier	ring finger protein 220	GO:0099149	regulation of postsynaptic neurotransmitter receptor endocytosis (GO:0099149)	BP
SUSD4	male-amplifier	sushi domain containing 4	GO:0099149	regulation of postsynaptic neurotransmitter receptor endocytosis (GO:0099149)	BP
SRPX2	male-amplifier	sushi repeat containing protein X-linked 2	GO:0051963	regulation of synapse assembly (GO:0051963)	BP
NEDD4L	male-amplifier	NEDD4 like E3 ubiquitin protein ligase	GO:0140252	regulation protein catabolic process at postsynapse (GO:0140252)	BP
NEDD4L	male-amplifier	NEDD4 like E3 ubiquitin protein ligase	GO:0099149	regulation of postsynaptic neurotransmitter receptor endocytosis (GO:0099149)	BP
LIMK1	male-amplifier	LIM domain kinase 1	GO:1905274	regulation of modification of postsynaptic actin cytoskeleton (GO:1905274)	BP
MIB2	male-amplifier	MIB E3 ubiquitin protein ligase 2	GO:0140252	regulation protein catabolic process at postsynapse (GO:0140252)	BP
MIB2	male-amplifier	MIB E3 ubiquitin protein ligase 2	GO:0099149	regulation of postsynaptic neurotransmitter receptor endocytosis (GO:0099149)	BP
CBLB	male-amplifier	Cbl proto-oncogene B	GO:0140252	regulation protein catabolic process at postsynapse (GO:0140252)	BP
CBLB	male-amplifier	Cbl proto-oncogene B	GO:0099149	regulation of postsynaptic neurotransmitter receptor endocytosis (GO:0099149)	BP
ACTN4	male-amplifier	actinin alpha 4	GO:0098973	structural constituent of postsynaptic actin cytoskeleton (GO:0098973)	BP
SRGAP3	male-amplifier	SLIT-ROBO Rho GTPase activating protein 3	GO:0150052	regulation of postsynapse assembly (GO:0150052)	BP
RAC1	male-amplifier	Rac family small GTPase 1	GO:0150052	regulation of postsynapse assembly (GO:0150052)	BP
CADM3	male-amplifier	cell adhesion molecule 3	GO:0099560	synapse adhesion between pre- and post-synapse (GO:0099560)	BP
SLC17A5	male-amplifier	solute carrier family 17 member 5	GO:0098700	synaptic vesicle neurotransmitter loading (GO:0098700)	BP
SEMA4C	male-amplifier	semaphorin 4C	GO:0150052	regulation of postsynapse assembly (GO:0150052)	BP
PCDH7	male-amplifier	protocadherin 7	GO:0150052	regulation of postsynapse assembly (GO:0150052)	BP
OSBPL2	male-amplifier	oxysterol binding protein like 2	GO:0010807	regulation of synaptic vesicle priming (GO:0010807)	BP
OSBPL2	male-amplifier	oxysterol binding protein like 2	GO:0099509	regulation of presynaptic cytosolic calcium levels (GO:0099509)	BP
CASKIN1	male-amplifier	CASK interacting protein 1	GO:0099151	regulation of postsynaptic density assembly (GO:0099151)	BP
UBE2N	male-amplifier	ubiquitin conjugating enzyme E2 N	GO:0140252	regulation protein catabolic process at postsynapse (GO:0140252)	BP
RAC1	male-amplifier	Rac family small GTPase 1	GO:1900242	regulation of synaptic vesicle endocytosis (GO:1900242)	BP
RTN4	male-amplifier	reticulon 4	GO:0150052	regulation of postsynapse assembly (GO:0150052)	BP
KCNT1	male-amplifier	potassium sodium-activated channel subfamily T member 1	GO:0060078	regulation of postsynaptic membrane potential (GO:0060078)	BP
PHACTR1	male-amplifier	phosphatase and actin regulator 1	GO:0099159	regulation of modification of postsynaptic structure (GO:0099159)	BP
MAP1B	male-amplifier	microtubule associated protein 1B	GO:0150052	regulation of postsynapse assembly (GO:0150052)	BP
FGFR1	male-amplifier	fibroblast growth factor receptor 1	GO:0099151	regulation of postsynaptic density assembly (GO:0099151)	BP
MKL2	male-amplifier	myocardin related transcription factor B	GO:0099159	regulation of modification of postsynaptic structure (GO:0099159)	BP
KIF1A	male-amplifier	kinesin family member 1A	GO:0098937	anterograde dendritic transport (GO:0098937)	BP
TANC2	male-amplifier	tetratricopeptide repeat, ankyrin repeat and coiled-coil containing 2	GO:0098919	structural constituent of postsynaptic density (GO:0098919)	BP
KIF1A	male-amplifier	kinesin family member 1A	GO:0048490	anterograde synaptic vesicle transport (GO:0048490)	BP
RAPGEF2	male-amplifier	Rap guanine nucleotide exchange factor 2	GO:0099159	regulation of modification of postsynaptic structure (GO:0099159)	BP
ABI3	male-amplifier	ABI family member 3	GO:0098885	modification of postsynaptic actin cytoskeleton (GO:0098885)	BP
ACCN2	male-amplifier	acid sensing ion channel subunit 1	GO:0150052	regulation of postsynapse assembly (GO:0150052)	BP
AP2A2	male-amplifier	adaptor related protein complex 2 subunit alpha 2	GO:0048488	synaptic vesicle endocytosis (GO:0048488)	BP
SYNJ2	male-amplifier	synaptojanin 2	GO:0048488	synaptic vesicle endocytosis (GO:0048488)	BP
AMOT	male-amplifier	angiomotin	GO:1905274	regulation of modification of postsynaptic actin cytoskeleton (GO:1905274)	BP
LATS1	male-amplifier	large tumor suppressor kinase 1	GO:0099151	regulation of postsynaptic density assembly (GO:0099151)	BP
ATP8A1	male-amplifier	ATPase phospholipid transporting 8A1	GO:0048488	synaptic vesicle endocytosis (GO:0048488)	BP
CYFIP2	male-amplifier	cytoplasmic FMR1 interacting protein 2	GO:0150052	regulation of postsynapse assembly (GO:0150052)	BP
EPS15L1	male-amplifier	epidermal growth factor receptor pathway substrate 15 like 1	GO:0048488	synaptic vesicle endocytosis (GO:0048488)	BP
MINK1	male-amplifier	misshapen like kinase 1	GO:0099175	regulation of postsynapse organization (GO:0099175)	BP
UBE3B	male-amplifier	ubiquitin protein ligase E3B	GO:0150052	regulation of postsynapse assembly (GO:0150052)	BP
NCDN	male-amplifier	neurochondrin	GO:0099149	regulation of postsynaptic neurotransmitter receptor endocytosis (GO:0099149)	BP
KCNA4	male-amplifier	potassium voltage-gated channel subfamily A member 4	GO:0099056	integral component of presynaptic membrane (GO:0099056)	CC
KCNA4	male-amplifier	potassium voltage-gated channel subfamily A member 4	GO:0099055	integral component of postsynaptic membrane (GO:0099055)	CC
NPTN	male-amplifier	neuroplastin	GO:0099061	integral component of postsynaptic density membrane (GO:0099061)	CC
NPTN	male-amplifier	neuroplastin	GO:0099059	integral component of presynaptic active zone membrane (GO:0099059)	CC
NPTN	male-amplifier	neuroplastin	GO:0097060	synaptic membrane (GO:0097060)	CC
NAPA	male-amplifier	NSF attachment protein alpha	GO:0048787	presynaptic active zone membrane (GO:0048787)	CC
SNAPIN	male-amplifier	SNAP associated protein	GO:0008021	synaptic vesicle (GO:0008021)	CC
RAB3B	male-amplifier	RAB3B, member RAS oncogene family	GO:0098993	anchored component of synaptic vesicle membrane (GO:0098993)	CC
PPM1H	male-amplifier	protein phosphatase, Mg2+/Mn2+ dependent 1H	GO:0045202	synapse (GO:0045202)	CC
PRKCG	male-amplifier	protein kinase C gamma	GO:0099523	presynaptic cytosol (GO:0099523)	CC
PRKCA	male-amplifier	protein kinase C alpha	GO:0099523	presynaptic cytosol (GO:0099523)	CC
CTBP2	male-amplifier	C-terminal binding protein 2	GO:0099523	presynaptic cytosol (GO:0099523)	CC
CTBP2	male-amplifier	C-terminal binding protein 2	GO:0098831	presynaptic active zone cytoplasmic component (GO:0098831)	CC
RIMS3	male-amplifier	regulating synaptic membrane exocytosis 3	GO:0099524	postsynaptic cytosol (GO:0099524)	CC
PLD1	male-amplifier	phospholipase D1	GO:0045202	synapse (GO:0045202)	CC
ATP2B1	male-amplifier	ATPase plasma membrane Ca2+ transporting 1	GO:0099059	integral component of presynaptic active zone membrane (GO:0099059)	CC
ATP2B4	male-amplifier	ATPase plasma membrane Ca2+ transporting 4	GO:0099059	integral component of presynaptic active zone membrane (GO:0099059)	CC
BSN	male-amplifier	bassoon presynaptic cytomatrix protein	GO:0098831	presynaptic active zone cytoplasmic component (GO:0098831)	CC
BSN	male-amplifier	bassoon presynaptic cytomatrix protein	GO:0098831	presynaptic active zone cytoplasmic component (GO:0098831)	CC
PRKCE	male-amplifier	protein kinase C epsilon	GO:0099523	presynaptic cytosol (GO:0099523)	CC
BSN	male-amplifier	bassoon presynaptic cytomatrix protein	GO:0098831	presynaptic active zone cytoplasmic component (GO:0098831)	CC
DNAJC5	male-amplifier	DnaJ heat shock protein family (Hsp40) member C5	GO:0098993	anchored component of synaptic vesicle membrane (GO:0098993)	CC
PNKD	male-amplifier	PNKD metallo-beta-lactamase domain containing	GO:0099523	presynaptic cytosol (GO:0099523)	CC
RAB5C	male-amplifier	RAB5C, member RAS oncogene family	GO:0098993	anchored component of synaptic vesicle membrane (GO:0098993)	CC
RAB35	male-amplifier	RAB35, member RAS oncogene family	GO:0098993	anchored component of synaptic vesicle membrane (GO:0098993)	CC
RAB11B	male-amplifier	RAB11B, member RAS oncogene family	GO:0098993	anchored component of synaptic vesicle membrane (GO:0098993)	CC
PRKCZ	male-amplifier	protein kinase C zeta	GO:0014069	postsynaptic density (GO:0014069)	CC
ITPR3	male-amplifier	inositol 1,4,5-trisphosphate receptor type 3	SYNGO:presyn_er_membrane_integral	integral component of presynaptic ER membrane	CC
ITPR1	male-amplifier	inositol 1,4,5-trisphosphate receptor type 1	SYNGO:postsyn_ser_membrane_integral	integral component of postsynaptic SER membrane	CC
ITPR1	male-amplifier	inositol 1,4,5-trisphosphate receptor type 1	SYNGO:presyn_ser_membrane_integral	integral component of presynaptic SER membrane	CC
EXOC3	male-amplifier	exocyst complex component 3	GO:0042734	presynaptic membrane (GO:0042734)	CC
KCNA3	male-amplifier	potassium voltage-gated channel subfamily A member 3	GO:0099056	integral component of presynaptic membrane (GO:0099056)	CC
KCNA3	male-amplifier	potassium voltage-gated channel subfamily A member 3	GO:0099055	integral component of postsynaptic membrane (GO:0099055)	CC
FLOT1	male-amplifier	flotillin 1	GO:0045202	synapse (GO:0045202)	CC
SNX1	male-amplifier	sorting nexin 1	GO:0098999	extrinsic component of postsynaptic endosome membrane (GO:0098999)	CC
RAB6B	male-amplifier	RAB6B, member RAS oncogene family	GO:0098793	presynapse (GO:0098793)	CC
GRIP1	male-amplifier	glutamate receptor interacting protein 1	GO:0098794	postsynapse (GO:0098794)	CC
FLNA	male-amplifier	filamin A	GO:0098794	postsynapse (GO:0098794)	CC
FILIP1	male-amplifier	filamin A interacting protein 1	GO:0098871	postsynaptic actin cytoskeleton (GO:0098871)	CC
CTTN	male-amplifier	cortactin	GO:0098871	postsynaptic actin cytoskeleton (GO:0098871)	CC
DBN1	male-amplifier	drebrin 1	GO:0098871	postsynaptic actin cytoskeleton (GO:0098871)	CC
NPTX2	male-amplifier	neuronal pentraxin 2	GO:0098892	extrinsic component of postsynaptic specialization membrane (GO:0098892)	CC
CADM3	male-amplifier	cell adhesion molecule 3	GO:0099056	integral component of presynaptic membrane (GO:0099056)	CC
PRKCG	male-amplifier	protein kinase C gamma	GO:0099524	postsynaptic cytosol (GO:0099524)	CC
EPHA4	male-amplifier	EPH receptor A4	GO:0099056	integral component of presynaptic membrane (GO:0099056)	CC
EPHA4	male-amplifier	EPH receptor A4	GO:0099055	integral component of postsynaptic membrane (GO:0099055)	CC
FLOT1	male-amplifier	flotillin 1	GO:0048786	presynaptic active zone (GO:0048786)	CC
SYNPO	male-amplifier	synaptopodin	GO:0097444	spine apparatus (GO:0097444)	CC
CANX	male-amplifier	calnexin	GO:0099059	integral component of presynaptic active zone membrane (GO:0099059)	CC
CANX	male-amplifier	calnexin	GO:0099055	integral component of postsynaptic membrane (GO:0099055)	CC
ERC2	male-amplifier	ELKS/RAB6-interacting/CAST family member 2	GO:0098831	presynaptic active zone cytoplasmic component (GO:0098831)	CC
BAIAP2	male-amplifier	BAR/IMD domain containing adaptor protein 2	GO:0099524	postsynaptic cytosol (GO:0099524)	CC
BAIAP2	male-amplifier	BAR/IMD domain containing adaptor protein 2	GO:0099523	presynaptic cytosol (GO:0099523)	CC
DPYSL2	male-amplifier	dihydropyrimidinase like 2	GO:0098793	presynapse (GO:0098793)	CC
SLC10A4	male-amplifier	solute carrier family 10 member 4	GO:0030285	integral component of synaptic vesicle membrane (GO:0030285)	CC
SYDE1	male-amplifier	synapse defective Rho GTPase homolog 1	GO:0098831	presynaptic active zone cytoplasmic component (GO:0098831)	CC
SYDE2	male-amplifier	synapse defective Rho GTPase homolog 2	GO:0098831	presynaptic active zone cytoplasmic component (GO:0098831)	CC
CACNB1	male-amplifier	calcium voltage-gated channel auxiliary subunit beta 1	GO:0098793	presynapse (GO:0098793)	CC
EFNB1	male-amplifier	ephrin B1	GO:0099056	integral component of presynaptic membrane (GO:0099056)	CC
CTBP1	male-amplifier	C-terminal binding protein 1	GO:0098831	presynaptic active zone cytoplasmic component (GO:0098831)	CC
CTBP2	male-amplifier	C-terminal binding protein 2	GO:0098831	presynaptic active zone cytoplasmic component (GO:0098831)	CC
CACNA1B	male-amplifier	calcium voltage-gated channel subunit alpha1 B	GO:0099056	integral component of presynaptic membrane (GO:0099056)	CC
CACNA1A	male-amplifier	calcium voltage-gated channel subunit alpha1 A	GO:0099059	integral component of presynaptic active zone membrane (GO:0099059)	CC
CACNA1C	male-amplifier	calcium voltage-gated channel subunit alpha1 C	GO:0099055	integral component of postsynaptic membrane (GO:0099055)	CC
CACNA1H	male-amplifier	calcium voltage-gated channel subunit alpha1 H	GO:0099059	integral component of presynaptic active zone membrane (GO:0099059)	CC
EFNB2	male-amplifier	ephrin B2	GO:0099056	integral component of presynaptic membrane (GO:0099056)	CC
EFNB2	male-amplifier	ephrin B2	GO:0099061	integral component of postsynaptic density membrane (GO:0099061)	CC
SHANK3	male-amplifier	SH3 and multiple ankyrin repeat domains 3	GO:0099092	postsynaptic density, intracellular component (GO:0099092)	CC
CPEB3	male-amplifier	cytoplasmic polyadenylation element binding protein 3	GO:0098794	postsynapse (GO:0098794)	CC
CYFIP2	male-amplifier	cytoplasmic FMR1 interacting protein 2	GO:0045202	synapse (GO:0045202)	CC
CYFIP1	male-amplifier	cytoplasmic FMR1 interacting protein 1	GO:0098794	postsynapse (GO:0098794)	CC
PRKAR1A	male-amplifier	protein kinase cAMP-dependent type I regulatory subunit alpha	GO:0045202	synapse (GO:0045202)	CC
PRKAR1B	male-amplifier	protein kinase cAMP-dependent type I regulatory subunit beta	GO:0045202	synapse (GO:0045202)	CC
CACNA1H	male-amplifier	calcium voltage-gated channel subunit alpha1 H	GO:0099055	integral component of postsynaptic membrane (GO:0099055)	CC
SLC18A2	male-amplifier	solute carrier family 18 member A2	GO:0030285	integral component of synaptic vesicle membrane (GO:0030285)	CC
SLC18A2	male-amplifier	solute carrier family 18 member A2	GO:0098794	postsynapse (GO:0098794)	CC
AGRN	male-amplifier	agrin	GO:0098965	extracellular matrix of synaptic cleft (GO:0098965)	CC
AGRN	male-amplifier	agrin	GO:0045202	synapse (GO:0045202)	CC
PAK1	male-amplifier	p21 (RAC1) activated kinase 1	GO:0014069	postsynaptic density (GO:0014069)	CC
FXR1	male-amplifier	FMR1 autosomal homolog 1	GO:0098794	postsynapse (GO:0098794)	CC
SYNGAP1	male-amplifier	synaptic Ras GTPase activating protein 1	GO:0099092	postsynaptic density, intracellular component (GO:0099092)	CC
SHANK2	male-amplifier	SH3 and multiple ankyrin repeat domains 2	GO:0014069	postsynaptic density (GO:0014069)	CC
HTT	male-amplifier	huntingtin	GO:0099523	presynaptic cytosol (GO:0099523)	CC
HTT	male-amplifier	huntingtin	GO:0099524	postsynaptic cytosol (GO:0099524)	CC
NRP1	male-amplifier	neuropilin 1	GO:0099055	integral component of postsynaptic membrane (GO:0099055)	CC
SHANK3	male-amplifier	SH3 and multiple ankyrin repeat domains 3	GO:0014069	postsynaptic density (GO:0014069)	CC
MAGI2	male-amplifier	membrane associated guanylate kinase, WW and PDZ domain containing 2	GO:0014069	postsynaptic density (GO:0014069)	CC
MAGI2	male-amplifier	membrane associated guanylate kinase, WW and PDZ domain containing 2	GO:0098890	extrinsic component of postsynaptic membrane (GO:0098890)	CC
MAGI1	male-amplifier	membrane associated guanylate kinase, WW and PDZ domain containing 1	GO:0098793	presynapse (GO:0098793)	CC
BAIAP2	male-amplifier	BAR/IMD domain containing adaptor protein 2	GO:0099092	postsynaptic density, intracellular component (GO:0099092)	CC
PABPC1	male-amplifier	poly(A) binding protein cytoplasmic 1	GO:0045202	synapse (GO:0045202)	CC
WASF2	male-amplifier	WASP family member 2	GO:0045202	synapse (GO:0045202)	CC
WASF3	male-amplifier	WASP family member 3	GO:0098794	postsynapse (GO:0098794)	CC
CPLX2	male-amplifier	complexin 2	GO:0098793	presynapse (GO:0098793)	CC
CPLX2	male-amplifier	complexin 2	GO:0098793	presynapse (GO:0098793)	CC
CPLX2	male-amplifier	complexin 2	GO:0098794	postsynapse (GO:0098794)	CC
EEF1D	male-amplifier	eukaryotic translation elongation factor 1 delta	GO:0045202	synapse (GO:0045202)	CC
RPSA	male-amplifier	ribosomal protein SA	GO:0045202	synapse (GO:0045202)	CC
RPS3A	male-amplifier	ribosomal protein S3A	GO:0045202	synapse (GO:0045202)	CC
RPL29	male-amplifier	ribosomal protein L29	GO:0045202	synapse (GO:0045202)	CC
RPL3	male-amplifier	ribosomal protein L3	GO:0045202	synapse (GO:0045202)	CC
RPL18	male-amplifier	ribosomal protein L18	GO:0045202	synapse (GO:0045202)	CC
RPS4X	male-amplifier	ribosomal protein S4 X-linked	GO:0045202	synapse (GO:0045202)	CC
RPL10	male-amplifier	ribosomal protein L10	GO:0045202	synapse (GO:0045202)	CC
RPS20	male-amplifier	ribosomal protein S20	GO:0045202	synapse (GO:0045202)	CC
BCAN	male-amplifier	brevican	GO:0098966	perisynaptic extracellular matrix (GO:0098966)	CC
TTYH1	male-amplifier	tweety family member 1	GO:0045202	synapse (GO:0045202)	CC
BIN1	male-amplifier	bridging integrator 1	GO:0045202	synapse (GO:0045202)	CC
SLC6A17	male-amplifier	solute carrier family 6 member 17	GO:0030285	integral component of synaptic vesicle membrane (GO:0030285)	CC
DNAJC5	male-amplifier	DnaJ heat shock protein family (Hsp40) member C5	GO:0098993	anchored component of synaptic vesicle membrane (GO:0098993)	CC
RNF216	male-amplifier	ring finger protein 216	GO:0098843	postsynaptic endocytic zone (GO:0098843)	CC
RNF216	male-amplifier	ring finger protein 216	GO:0098793	presynapse (GO:0098793)	CC
KPNA1	male-amplifier	karyopherin subunit alpha 1	GO:0014069	postsynaptic density (GO:0014069)	CC
KPNA2	male-amplifier	karyopherin subunit alpha 2	GO:0014069	postsynaptic density (GO:0014069)	CC
FREQ	male-amplifier	neuronal calcium sensor 1	GO:0099523	presynaptic cytosol (GO:0099523)	CC
FREQ	male-amplifier	neuronal calcium sensor 1	GO:0099524	postsynaptic cytosol (GO:0099524)	CC
FREQ	male-amplifier	neuronal calcium sensor 1	GO:0098794	postsynapse (GO:0098794)	CC
GRASP	male-amplifier	trafficking regulator and scaffold protein tamalin	GO:0014069	postsynaptic density (GO:0014069)	CC
NAPA	male-amplifier	NSF attachment protein alpha	GO:0098793	presynapse (GO:0098793)	CC
NAPA	male-amplifier	NSF attachment protein alpha	GO:0098794	postsynapse (GO:0098794)	CC
FXYD6	male-amplifier	FXYD domain containing ion transport regulator 6	GO:0099056	integral component of presynaptic membrane (GO:0099056)	CC
FXYD6	male-amplifier	FXYD domain containing ion transport regulator 6	GO:0099055	integral component of postsynaptic membrane (GO:0099055)	CC
PIP5K1C	male-amplifier	phosphatidylinositol-4-phosphate 5-kinase type 1 gamma	GO:0098835	presynaptic endocytic zone membrane (GO:0098835)	CC
SLC6A9	male-amplifier	solute carrier family 6 member 9	GO:0099055	integral component of postsynaptic membrane (GO:0099055)	CC
SLC6A9	male-amplifier	solute carrier family 6 member 9	GO:0030285	integral component of synaptic vesicle membrane (GO:0030285)	CC
SYNJ2	male-amplifier	synaptojanin 2	GO:0098793	presynapse (GO:0098793)	CC
ANKS1B	male-amplifier	ankyrin repeat and sterile alpha motif domain containing 1B	GO:0014069	postsynaptic density (GO:0014069)	CC
ANKS1B	male-amplifier	ankyrin repeat and sterile alpha motif domain containing 1B	GO:0099523	presynaptic cytosol (GO:0099523)	CC
CRTC1	male-amplifier	CREB regulated transcription coactivator 1	GO:0014069	postsynaptic density (GO:0014069)	CC
SLC6A1	male-amplifier	solute carrier family 6 member 1	GO:0099056	integral component of presynaptic membrane (GO:0099056)	CC
SLC6A1	male-amplifier	solute carrier family 6 member 1	GO:0099055	integral component of postsynaptic membrane (GO:0099055)	CC
P2RX3	male-amplifier	purinergic receptor P2X 3	GO:0099056	integral component of presynaptic membrane (GO:0099056)	CC
CACNA1C	male-amplifier	calcium voltage-gated channel subunit alpha1 C	GO:0099056	integral component of presynaptic membrane (GO:0099056)	CC
SLC6A6	male-amplifier	solute carrier family 6 member 6	GO:0099055	integral component of postsynaptic membrane (GO:0099055)	CC
SLC6A4	male-amplifier	solute carrier family 6 member 4	GO:0099056	integral component of presynaptic membrane (GO:0099056)	CC
SLC6A4	male-amplifier	solute carrier family 6 member 4	GO:0099055	integral component of postsynaptic membrane (GO:0099055)	CC
SLC6A3	male-amplifier	solute carrier family 6 member 3	GO:0099055	integral component of postsynaptic membrane (GO:0099055)	CC
SLC6A3	male-amplifier	solute carrier family 6 member 3	GO:0099056	integral component of presynaptic membrane (GO:0099056)	CC
SLC8A1	male-amplifier	solute carrier family 8 member A1	GO:0099055	integral component of postsynaptic membrane (GO:0099055)	CC
PTPRS	male-amplifier	protein tyrosine phosphatase receptor type S	GO:0099056	integral component of presynaptic membrane (GO:0099056)	CC
SLC6A2	male-amplifier	solute carrier family 6 member 2	GO:0099056	integral component of presynaptic membrane (GO:0099056)	CC
SLC6A2	male-amplifier	solute carrier family 6 member 2	GO:0030285	integral component of synaptic vesicle membrane (GO:0030285)	CC
SLC18A3	male-amplifier	solute carrier family 18 member A3	GO:0030285	integral component of synaptic vesicle membrane (GO:0030285)	CC
CYTH1	male-amplifier	cytohesin 1	GO:0098888	extrinsic component of presynaptic membrane (GO:0098888)	CC
CAMK2A	male-amplifier	calcium/calmodulin dependent protein kinase II alpha	GO:0099523	presynaptic cytosol (GO:0099523)	CC
CAMK2A	male-amplifier	calcium/calmodulin dependent protein kinase II alpha	GO:0099524	postsynaptic cytosol (GO:0099524)	CC
CAMK2B	male-amplifier	calcium/calmodulin dependent protein kinase II beta	GO:0014069	postsynaptic density (GO:0014069)	CC
CAMK2A	male-amplifier	calcium/calmodulin dependent protein kinase II alpha	GO:0014069	postsynaptic density (GO:0014069)	CC
ERBB2IP	male-amplifier	erbb2 interacting protein	GO:0099572	postsynaptic specialization (GO:0099572)	CC
NRXN1	male-amplifier	neurexin 1	GO:0099056	integral component of presynaptic membrane (GO:0099056)	CC
CNTNAP1	male-amplifier	contactin associated protein 1	GO:0048786	presynaptic active zone (GO:0048786)	CC
NRXN1	male-amplifier	neurexin 1	GO:0099056	integral component of presynaptic membrane (GO:0099056)	CC
DOCK1	male-amplifier	dedicator of cytokinesis 1	GO:0098793	presynapse (GO:0098793)	CC
TSC2	male-amplifier	TSC complex subunit 2	GO:0045202	synapse (GO:0045202)	CC
PPP1R9B	male-amplifier	protein phosphatase 1 regulatory subunit 9B	GO:0014069	postsynaptic density (GO:0014069)	CC
CTBP1	male-amplifier	C-terminal binding protein 1	GO:0098831	presynaptic active zone cytoplasmic component (GO:0098831)	CC
EPS8	male-amplifier	EGFR pathway substrate 8, signaling adaptor	GO:0014069	postsynaptic density (GO:0014069)	CC
PPFIA3	male-amplifier	PTPRF interacting protein alpha 3	GO:0045202	synapse (GO:0045202)	CC
PPFIBP2	male-amplifier	PPFIA binding protein 2	GO:0098793	presynapse (GO:0098793)	CC
ODZ2	male-amplifier	teneurin transmembrane protein 2	GO:0098890	extrinsic component of postsynaptic membrane (GO:0098890)	CC
CNTN5	male-amplifier	contactin 5	GO:0099026	anchored component of presynaptic membrane (GO:0099026)	CC
CSNK2B	male-amplifier	casein kinase 2 beta	GO:0099523	presynaptic cytosol (GO:0099523)	CC
PENK	male-amplifier	proenkephalin	GO:0099013	neuronal dense core vesicle lumen (GO:0099013)	CC
PENK	male-amplifier	proenkephalin	GO:0034592	synaptic vesicle lumen (GO:0034592)	CC
PPP2R1B	male-amplifier	protein phosphatase 2 scaffold subunit Abeta	GO:0045202	synapse (GO:0045202)	CC
CAMK1	male-amplifier	calcium/calmodulin dependent protein kinase I	GO:0014069	postsynaptic density (GO:0014069)	CC
ACTN2	male-amplifier	actinin alpha 2	GO:0098871	postsynaptic actin cytoskeleton (GO:0098871)	CC
GIPC1	male-amplifier	GIPC PDZ domain containing family member 1	GO:0098793	presynapse (GO:0098793)	CC
GIPC1	male-amplifier	GIPC PDZ domain containing family member 1	GO:0098794	postsynapse (GO:0098794)	CC
CTNNA2	male-amplifier	catenin alpha 2	GO:0099092	postsynaptic density, intracellular component (GO:0099092)	CC
ATP8A1	male-amplifier	ATPase phospholipid transporting 8A1	GO:0030285	integral component of synaptic vesicle membrane (GO:0030285)	CC
CTNNA2	male-amplifier	catenin alpha 2	GO:0098831	presynaptic active zone cytoplasmic component (GO:0098831)	CC
CTTN	male-amplifier	cortactin	GO:0098871	postsynaptic actin cytoskeleton (GO:0098871)	CC
CHRM2	male-amplifier	cholinergic receptor muscarinic 2	GO:0099059	integral component of presynaptic active zone membrane (GO:0099059)	CC
RELA	male-amplifier	RELA proto-oncogene, NF-kB subunit	GO:0045202	synapse (GO:0045202)	CC
SEPT6	male-amplifier	septin 6	GO:0098793	presynapse (GO:0098793)	CC
SEPT7	male-amplifier	septin 7	GO:0042734	presynaptic membrane (GO:0042734)	CC
FLOT1	male-amplifier	flotillin 1	GO:0098793	presynapse (GO:0098793)	CC
IQSEC3	male-amplifier	IQ motif and Sec7 domain ArfGEF 3	GO:0099629	postsynaptic specialization of symmetric synapse (GO:0099629)	CC
IQSEC2	male-amplifier	IQ motif and Sec7 domain ArfGEF 2	GO:0099092	postsynaptic density, intracellular component (GO:0099092)	CC
IQSEC2	male-amplifier	IQ motif and Sec7 domain ArfGEF 2	GO:0098831	presynaptic active zone cytoplasmic component (GO:0098831)	CC
IQSEC1	male-amplifier	IQ motif and Sec7 domain ArfGEF 1	GO:0099092	postsynaptic density, intracellular component (GO:0099092)	CC
CDH23	male-amplifier	cadherin related 23	GO:0045202	synapse (GO:0045202)	CC
PPP3CA	male-amplifier	protein phosphatase 3 catalytic subunit alpha	GO:0045202	synapse (GO:0045202)	CC
SLC6A9	male-amplifier	solute carrier family 6 member 9	GO:0014069	postsynaptic density (GO:0014069)	CC
SLC6A9	male-amplifier	solute carrier family 6 member 9	GO:0099056	integral component of presynaptic membrane (GO:0099056)	CC
ADRA2A	male-amplifier	adrenoceptor alpha 2A	GO:0099061	integral component of postsynaptic density membrane (GO:0099061)	CC
ADRA2A	male-amplifier	adrenoceptor alpha 2A	GO:0099055	integral component of postsynaptic membrane (GO:0099055)	CC
ADRA2A	male-amplifier	adrenoceptor alpha 2A	GO:0099059	integral component of presynaptic active zone membrane (GO:0099059)	CC
SGTA	male-amplifier	small glutamine rich tetratricopeptide repeat co-chaperone alpha	GO:0098850	extrinsic component of synaptic vesicle membrane (GO:0098850)	CC
SLC18A3	male-amplifier	solute carrier family 18 member A3	GO:0030285	integral component of synaptic vesicle membrane (GO:0030285)	CC
GRIK4	male-amplifier	glutamate ionotropic receptor kainate type subunit 4	GO:0099056	integral component of presynaptic membrane (GO:0099056)	CC
GRIK4	male-amplifier	glutamate ionotropic receptor kainate type subunit 4	GO:0099056	integral component of presynaptic membrane (GO:0099056)	CC
SLC29A1	male-amplifier	solute carrier family 29 member 1 (Augustine blood group)	GO:0098793	presynapse (GO:0098793)	CC
SLC29A1	male-amplifier	solute carrier family 29 member 1 (Augustine blood group)	GO:0098794	postsynapse (GO:0098794)	CC
MAP2K1	male-amplifier	mitogen-activated protein kinase kinase 1	GO:0014069	postsynaptic density (GO:0014069)	CC
SLC18A2	male-amplifier	solute carrier family 18 member A2	GO:0098992	neuronal dense core vesicle (GO:0098992)	CC
SYN3	male-amplifier	synapsin III	GO:0098850	extrinsic component of synaptic vesicle membrane (GO:0098850)	CC
SYNGR3	male-amplifier	synaptogyrin 3	GO:0008021	synaptic vesicle (GO:0008021)	CC
SYNPR	male-amplifier	synaptoporin	GO:0030285	integral component of synaptic vesicle membrane (GO:0030285)	CC
GRIA4	male-amplifier	glutamate ionotropic receptor AMPA type subunit 4	GO:0099059	integral component of presynaptic active zone membrane (GO:0099059)	CC
SNAP47	male-amplifier	synaptosome associated protein 47	GO:0048786	presynaptic active zone (GO:0048786)	CC
PTPRN2	male-amplifier	protein tyrosine phosphatase receptor type N2	GO:0030285	integral component of synaptic vesicle membrane (GO:0030285)	CC
SYN3	male-amplifier	synapsin III	GO:0098850	extrinsic component of synaptic vesicle membrane (GO:0098850)	CC
EXOC4	male-amplifier	exocyst complex component 4	GO:0008021	synaptic vesicle (GO:0008021)	CC
SEC22B	male-amplifier	SEC22 homolog B, vesicle trafficking protein	GO:0008021	synaptic vesicle (GO:0008021)	CC
STX6	male-amplifier	syntaxin 6	GO:0030285	integral component of synaptic vesicle membrane (GO:0030285)	CC
GABBR1	male-amplifier	gamma-aminobutyric acid type B receptor subunit 1	GO:0099056	integral component of presynaptic membrane (GO:0099056)	CC
STX6	male-amplifier	syntaxin 6	GO:0030285	integral component of synaptic vesicle membrane (GO:0030285)	CC
ANKS1B	male-amplifier	ankyrin repeat and sterile alpha motif domain containing 1B	GO:0099092	postsynaptic density, intracellular component (GO:0099092)	CC
PURA	male-amplifier	purine rich element binding protein A	GO:0098794	postsynapse (GO:0098794)	CC
IQSEC2	male-amplifier	IQ motif and Sec7 domain ArfGEF 2	GO:0098839	postsynaptic density membrane (GO:0098839)	CC
EPN1	male-amplifier	epsin 1	GO:0098894	extrinsic component of presynaptic endocytic zone membrane (GO:0098894)	CC
EPS15	male-amplifier	epidermal growth factor receptor pathway substrate 15	GO:0098894	extrinsic component of presynaptic endocytic zone membrane (GO:0098894)	CC
EPS15L1	male-amplifier	epidermal growth factor receptor pathway substrate 15 like 1	GO:0098894	extrinsic component of presynaptic endocytic zone membrane (GO:0098894)	CC
EIF4EBP1	male-amplifier	eukaryotic translation initiation factor 4E binding protein 1	GO:0099524	postsynaptic cytosol (GO:0099524)	CC
PAK1	male-amplifier	p21 (RAC1) activated kinase 1	GO:0098794	postsynapse (GO:0098794)	CC
IQSEC3	male-amplifier	IQ motif and Sec7 domain ArfGEF 3	GO:0099629	postsynaptic specialization of symmetric synapse (GO:0099629)	CC
GRIN2D	male-amplifier	glutamate ionotropic receptor NMDA type subunit 2D	GO:0099056	integral component of presynaptic membrane (GO:0099056)	CC
GRIN2D	male-amplifier	glutamate ionotropic receptor NMDA type subunit 2D	GO:0099059	integral component of presynaptic active zone membrane (GO:0099059)	CC
CHRNA6	male-amplifier	cholinergic receptor nicotinic alpha 6 subunit	GO:0099056	integral component of presynaptic membrane (GO:0099056)	CC
CHRNA6	male-amplifier	cholinergic receptor nicotinic alpha 6 subunit	GO:0099055	integral component of postsynaptic membrane (GO:0099055)	CC
CHRNA6	male-amplifier	cholinergic receptor nicotinic alpha 6 subunit	GO:0099056	integral component of presynaptic membrane (GO:0099056)	CC
CHRNA6	male-amplifier	cholinergic receptor nicotinic alpha 6 subunit	GO:0099055	integral component of postsynaptic membrane (GO:0099055)	CC
DBN1	male-amplifier	drebrin 1	GO:0099524	postsynaptic cytosol (GO:0099524)	CC
ITSN1	male-amplifier	intersectin 1	GO:0098871	postsynaptic actin cytoskeleton (GO:0098871)	CC
KCNMA1	male-amplifier	potassium calcium-activated channel subfamily M alpha 1	GO:0099059	integral component of presynaptic active zone membrane (GO:0099059)	CC
GRIK4	male-amplifier	glutamate ionotropic receptor kainate type subunit 4	GO:0099055	integral component of postsynaptic membrane (GO:0099055)	CC
GRIN2D	male-amplifier	glutamate ionotropic receptor NMDA type subunit 2D	GO:0099061	integral component of postsynaptic density membrane (GO:0099061)	CC
BCAN	male-amplifier	brevican	GO:0098966	perisynaptic extracellular matrix (GO:0098966)	CC
SPTBN1	male-amplifier	spectrin beta, non-erythrocytic 1	GO:0098794	postsynapse (GO:0098794)	CC
HTR2A	male-amplifier	5-hydroxytryptamine receptor 2A	GO:0099055	integral component of postsynaptic membrane (GO:0099055)	CC
HTR2A	male-amplifier	5-hydroxytryptamine receptor 2A	GO:0099056	integral component of presynaptic membrane (GO:0099056)	CC
SLC18A2	male-amplifier	solute carrier family 18 member A2	GO:0099066	integral component of neuronal dense core vesicle membrane (GO:0099066)	CC
BIN1	male-amplifier	bridging integrator 1	GO:0098850	extrinsic component of synaptic vesicle membrane (GO:0098850)	CC
CACNA1D	male-amplifier	calcium voltage-gated channel subunit alpha1 D	GO:0099059	integral component of presynaptic active zone membrane (GO:0099059)	CC
GABBR1	male-amplifier	gamma-aminobutyric acid type B receptor subunit 1	GO:0099056	integral component of presynaptic membrane (GO:0099056)	CC
EIF4G1	male-amplifier	eukaryotic translation initiation factor 4 gamma 1	GO:0098794	postsynapse (GO:0098794)	CC
CDH1	male-amplifier	cadherin 1	GO:0098794	postsynapse (GO:0098794)	CC
SYT2	male-amplifier	synaptotagmin 2	GO:0030285	integral component of synaptic vesicle membrane (GO:0030285)	CC
SEPT8	male-amplifier	septin 8	GO:0098793	presynapse (GO:0098793)	CC
SLC3A2	male-amplifier	solute carrier family 3 member 2	GO:0045202	synapse (GO:0045202)	CC
RAPH1	male-amplifier	Ras association (RalGDS/AF-6) and pleckstrin homology domains 1	GO:0099523	presynaptic cytosol (GO:0099523)	CC
CLU	male-amplifier	clusterin	GO:0045202	synapse (GO:0045202)	CC
GPR123	male-amplifier	adhesion G protein-coupled receptor A1	GO:0014069	postsynaptic density (GO:0014069)	CC
PLEKHA5	male-amplifier	pleckstrin homology domain containing A5	GO:0014069	postsynaptic density (GO:0014069)	CC
GPC1	male-amplifier	glypican 1	GO:0045202	synapse (GO:0045202)	CC
DVL1	male-amplifier	dishevelled segment polarity protein 1	GO:0098793	presynapse (GO:0098793)	CC
KALRN	male-amplifier	kalirin RhoGEF kinase	GO:0098793	presynapse (GO:0098793)	CC
EPS8	male-amplifier	EGFR pathway substrate 8, signaling adaptor	GO:0014069	postsynaptic density (GO:0014069)	CC
SPARC	male-amplifier	secreted protein acidic and cysteine rich	GO:0045202	synapse (GO:0045202)	CC
GABBR1	male-amplifier	gamma-aminobutyric acid type B receptor subunit 1	GO:0099055	integral component of postsynaptic membrane (GO:0099055)	CC
GABBR2	male-amplifier	gamma-aminobutyric acid type B receptor subunit 2	GO:0099055	integral component of postsynaptic membrane (GO:0099055)	CC
RPL22	male-amplifier	ribosomal protein L22	SYNGO:presyn_ribosome	presynaptic ribosome	CC
SNAP47	male-amplifier	synaptosome associated protein 47	GO:0014069	postsynaptic density (GO:0014069)	CC
DNM3	male-amplifier	dynamin 3	GO:0098793	presynapse (GO:0098793)	CC
SH3GL1	male-amplifier	SH3 domain containing GRB2 like 1, endophilin A2	GO:0045202	synapse (GO:0045202)	CC
DNM1	male-amplifier	dynamin 1	GO:0098835	presynaptic endocytic zone membrane (GO:0098835)	CC
DNM1	male-amplifier	dynamin 1	GO:0098835	presynaptic endocytic zone membrane (GO:0098835)	CC
ITSN1	male-amplifier	intersectin 1	GO:0098833	presynaptic endocytic zone (GO:0098833)	CC
BAI1	male-amplifier	adhesion G protein-coupled receptor B1	GO:0099055	integral component of postsynaptic membrane (GO:0099055)	CC
P2RY2	male-amplifier	purinergic receptor P2Y2	GO:0099059	integral component of presynaptic active zone membrane (GO:0099059)	CC
ARHGEF2	male-amplifier	Rho/Rac guanine nucleotide exchange factor 2	GO:0099092	postsynaptic density, intracellular component (GO:0099092)	CC
DGKQ	male-amplifier	diacylglycerol kinase theta	GO:0098793	presynapse (GO:0098793)	CC
DGKQ	male-amplifier	diacylglycerol kinase theta	GO:0098794	postsynapse (GO:0098794)	CC
NRP2	male-amplifier	neuropilin 2	GO:0099055	integral component of postsynaptic membrane (GO:0099055)	CC
HSPA8	male-amplifier	heat shock protein family A (Hsp70) member 8	GO:0098793	presynapse (GO:0098793)	CC
EHD1	male-amplifier	EH domain containing 1	GO:0098793	presynapse (GO:0098793)	CC
ERBB2IP	male-amplifier	erbb2 interacting protein	GO:0098794	postsynapse (GO:0098794)	CC
FARP1	male-amplifier	FERM, ARH/RhoGEF and pleckstrin domain protein 1	GO:0098890	extrinsic component of postsynaptic membrane (GO:0098890)	CC
CTNNA2	male-amplifier	catenin alpha 2	GO:0098890	extrinsic component of postsynaptic membrane (GO:0098890)	CC
CTNNA2	male-amplifier	catenin alpha 2	GO:0098888	extrinsic component of presynaptic membrane (GO:0098888)	CC
SRC	male-amplifier	SRC proto-oncogene, non-receptor tyrosine kinase	GO:0099091	postsynaptic specialization, intracellular component (GO:0099091)	CC
GIT1	male-amplifier	GIT ArfGAP 1	GO:0098794	postsynapse (GO:0098794)	CC
GSK3B	male-amplifier	glycogen synthase kinase 3 beta	GO:0014069	postsynaptic density (GO:0014069)	CC
TNIK	male-amplifier	TRAF2 and NCK interacting kinase	GO:0099092	postsynaptic density, intracellular component (GO:0099092)	CC
ACTN2	male-amplifier	actinin alpha 2	GO:0098839	postsynaptic density membrane (GO:0098839)	CC
ACTN2	male-amplifier	actinin alpha 2	GO:0099092	postsynaptic density, intracellular component (GO:0099092)	CC
SIPA1L1	male-amplifier	signal induced proliferation associated 1 like 1	GO:0098794	postsynapse (GO:0098794)	CC
SLC1A2	male-amplifier	solute carrier family 1 member 2	GO:0099056	integral component of presynaptic membrane (GO:0099056)	CC
NTRK3	male-amplifier	neurotrophic receptor tyrosine kinase 3	GO:0099055	integral component of postsynaptic membrane (GO:0099055)	CC
TNIK	male-amplifier	TRAF2 and NCK interacting kinase	GO:0098793	presynapse (GO:0098793)	CC
PURA	male-amplifier	purine rich element binding protein A	GO:0014069	postsynaptic density (GO:0014069)	CC
GPC4	male-amplifier	glypican 4	GO:0045202	synapse (GO:0045202)	CC
GPC6	male-amplifier	glypican 6	GO:0045202	synapse (GO:0045202)	CC
PABPC1	male-amplifier	poly(A) binding protein cytoplasmic 1	GO:0045202	synapse (GO:0045202)	CC
RTN4	male-amplifier	reticulon 4	GO:0099061	integral component of postsynaptic density membrane (GO:0099061)	CC
SLC6A1	male-amplifier	solute carrier family 6 member 1	GO:0099056	integral component of presynaptic membrane (GO:0099056)	CC
LCK	male-amplifier	LCK proto-oncogene, Src family tyrosine kinase	GO:0099091	postsynaptic specialization, intracellular component (GO:0099091)	CC
GABBR2	male-amplifier	gamma-aminobutyric acid type B receptor subunit 2	GO:0099056	integral component of presynaptic membrane (GO:0099056)	CC
MTOR	male-amplifier	mechanistic target of rapamycin kinase	GO:0099524	postsynaptic cytosol (GO:0099524)	CC
DBN1	male-amplifier	drebrin 1	GO:0045211	postsynaptic membrane (GO:0045211)	CC
ABHD6	male-amplifier	abhydrolase domain containing 6, acylglycerol lipase	GO:0099055	integral component of postsynaptic membrane (GO:0099055)	CC
DBN1	male-amplifier	drebrin 1	GO:0014069	postsynaptic density (GO:0014069)	CC
DBN1	male-amplifier	drebrin 1	GO:0045211	postsynaptic membrane (GO:0045211)	CC
CHRNA9	male-amplifier	cholinergic receptor nicotinic alpha 9 subunit	GO:0099060	integral component of postsynaptic specialization membrane (GO:0099060)	CC
CACNG2	male-amplifier	calcium voltage-gated channel auxiliary subunit gamma 2	GO:0099061	integral component of postsynaptic density membrane (GO:0099061)	CC
CACNG8	male-amplifier	calcium voltage-gated channel auxiliary subunit gamma 8	GO:0099061	integral component of postsynaptic density membrane (GO:0099061)	CC
DLG1	male-amplifier	discs large MAGUK scaffold protein 1	GO:0099092	postsynaptic density, intracellular component (GO:0099092)	CC
DLG2	male-amplifier	discs large MAGUK scaffold protein 2	GO:0099031	anchored component of postsynaptic density membrane (GO:0099031)	CC
DLG4	male-amplifier	discs large MAGUK scaffold protein 4	GO:0099031	anchored component of postsynaptic density membrane (GO:0099031)	CC
DLG3	male-amplifier	discs large MAGUK scaffold protein 3	GO:0099092	postsynaptic density, intracellular component (GO:0099092)	CC
GABRA4	male-amplifier	gamma-aminobutyric acid type A receptor subunit alpha4	GO:0099060	integral component of postsynaptic specialization membrane (GO:0099060)	CC
TIAM1	male-amplifier	TIAM Rac1 associated GEF 1	GO:0099147	extrinsic component of postsynaptic density membrane (GO:0099147)	CC
RICH2	male-amplifier	Rho GTPase activating protein 44	GO:0014069	postsynaptic density (GO:0014069)	CC
RICH2	male-amplifier	Rho GTPase activating protein 44	GO:0048786	presynaptic active zone (GO:0048786)	CC
PTK2	male-amplifier	protein tyrosine kinase 2	GO:0098794	postsynapse (GO:0098794)	CC
PTK2B	male-amplifier	protein tyrosine kinase 2 beta	GO:0098794	postsynapse (GO:0098794)	CC
LAMA5	male-amplifier	laminin subunit alpha 5	GO:0043083	synaptic cleft (GO:0043083)	CC
LAMB2	male-amplifier	laminin subunit beta 2	GO:0043083	synaptic cleft (GO:0043083)	CC
NTRK2	male-amplifier	neurotrophic receptor tyrosine kinase 2	GO:0098794	postsynapse (GO:0098794)	CC
DAGLA	male-amplifier	diacylglycerol lipase alpha	GO:0099055	integral component of postsynaptic membrane (GO:0099055)	CC
SHISA9	male-amplifier	shisa family member 9	GO:0099061	integral component of postsynaptic density membrane (GO:0099061)	CC
NETO1	male-amplifier	neuropilin and tolloid like 1	GO:0099061	integral component of postsynaptic density membrane (GO:0099061)	CC
RAC1	male-amplifier	Rac family small GTPase 1	GO:0098794	postsynapse (GO:0098794)	CC
RAC1	male-amplifier	Rac family small GTPase 1	GO:0098794	postsynapse (GO:0098794)	CC
ITGB1	male-amplifier	integrin subunit beta 1	GO:0099055	integral component of postsynaptic membrane (GO:0099055)	CC
AP3D1	male-amplifier	adaptor related protein complex 3 subunit delta 1	GO:0098830	presynaptic endosome (GO:0098830)	CC
GABRB3	male-amplifier	gamma-aminobutyric acid type A receptor subunit beta3	GO:0099055	integral component of postsynaptic membrane (GO:0099055)	CC
GABRB3	male-amplifier	gamma-aminobutyric acid type A receptor subunit beta3	GO:0099060	integral component of postsynaptic specialization membrane (GO:0099060)	CC
GABBR1	male-amplifier	gamma-aminobutyric acid type B receptor subunit 1	GO:0099060	integral component of postsynaptic specialization membrane (GO:0099060)	CC
GABBR1	male-amplifier	gamma-aminobutyric acid type B receptor subunit 1	GO:0099055	integral component of postsynaptic membrane (GO:0099055)	CC
GABBR1	male-amplifier	gamma-aminobutyric acid type B receptor subunit 1	GO:0099059	integral component of presynaptic active zone membrane (GO:0099059)	CC
PRRT1	male-amplifier	proline rich transmembrane protein 1	GO:0099055	integral component of postsynaptic membrane (GO:0099055)	CC
ABR	male-amplifier	ABR activator of RhoGEF and GTPase	GO:0099092	postsynaptic density, intracellular component (GO:0099092)	CC
BCR	male-amplifier	BCR activator of RhoGEF and GTPase	GO:0099092	postsynaptic density, intracellular component (GO:0099092)	CC
DGKZ	male-amplifier	diacylglycerol kinase zeta	GO:0014069	postsynaptic density (GO:0014069)	CC
HSPA8	male-amplifier	heat shock protein family A (Hsp70) member 8	GO:0014069	postsynaptic density (GO:0014069)	CC
LAMC1	male-amplifier	laminin subunit gamma 1	GO:0043083	synaptic cleft (GO:0043083)	CC
LAMA4	male-amplifier	laminin subunit alpha 4	GO:0043083	synaptic cleft (GO:0043083)	CC
GPC4	male-amplifier	glypican 4	GO:0099026	anchored component of presynaptic membrane (GO:0099026)	CC
ITGB5	male-amplifier	integrin subunit beta 5	GO:0099699	integral component of synaptic membrane (GO:0099699)	CC
ITGB3	male-amplifier	integrin subunit beta 3	GO:0099699	integral component of synaptic membrane (GO:0099699)	CC
ITGB1	male-amplifier	integrin subunit beta 1	GO:0099699	integral component of synaptic membrane (GO:0099699)	CC
GRIP1	male-amplifier	glutamate receptor interacting protein 1	GO:0014069	postsynaptic density (GO:0014069)	CC
KALRN	male-amplifier	kalirin RhoGEF kinase	GO:0014069	postsynaptic density (GO:0014069)	CC
KCND3	male-amplifier	potassium voltage-gated channel subfamily D member 3	GO:0099060	integral component of postsynaptic specialization membrane (GO:0099060)	CC
PTPRS	male-amplifier	protein tyrosine phosphatase receptor type S	GO:0099056	integral component of presynaptic membrane (GO:0099056)	CC
TANC1	male-amplifier	tetratricopeptide repeat, ankyrin repeat and coiled-coil containing 1	GO:0099092	postsynaptic density, intracellular component (GO:0099092)	CC
TANC2	male-amplifier	tetratricopeptide repeat, ankyrin repeat and coiled-coil containing 2	GO:0099092	postsynaptic density, intracellular component (GO:0099092)	CC
GABRG3	male-amplifier	gamma-aminobutyric acid type A receptor subunit gamma3	GO:0099699	integral component of synaptic membrane (GO:0099699)	CC
PRR7	male-amplifier	proline rich 7, synaptic	GO:0099092	postsynaptic density, intracellular component (GO:0099092)	CC
GABRE	male-amplifier	gamma-aminobutyric acid type A receptor subunit epsilon	GO:0099055	integral component of postsynaptic membrane (GO:0099055)	CC
CACNB1	male-amplifier	calcium voltage-gated channel auxiliary subunit beta 1	GO:0098794	postsynapse (GO:0098794)	CC
CORO1A	male-amplifier	coronin 1A	GO:0045202	synapse (GO:0045202)	CC
ABLIM3	male-amplifier	actin binding LIM protein family member 3	GO:0045202	synapse (GO:0045202)	CC
CAPZB	male-amplifier	capping actin protein of muscle Z-line subunit beta	GO:0014069	postsynaptic density (GO:0014069)	CC
CDH11	male-amplifier	cadherin 11	GO:0045202	synapse (GO:0045202)	CC
CDH13	male-amplifier	cadherin 13	GO:0045202	synapse (GO:0045202)	CC
SNX1	male-amplifier	sorting nexin 1	GO:0099092	postsynaptic density, intracellular component (GO:0099092)	CC
SHISA6	male-amplifier	shisa family member 6	GO:0099061	integral component of postsynaptic density membrane (GO:0099061)	CC
GAPDH	male-amplifier	glyceraldehyde-3-phosphate dehydrogenase	GO:0099092	postsynaptic density, intracellular component (GO:0099092)	CC
GAPDH	male-amplifier	glyceraldehyde-3-phosphate dehydrogenase	GO:0098850	extrinsic component of synaptic vesicle membrane (GO:0098850)	CC
PCDH8	male-amplifier	protocadherin 8	GO:0045202	synapse (GO:0045202)	CC
PCDH8	male-amplifier	protocadherin 8	GO:0099055	integral component of postsynaptic membrane (GO:0099055)	CC
ARFGAP1	male-amplifier	ADP ribosylation factor GTPase activating protein 1	GO:0045202	synapse (GO:0045202)	CC
LRRK2	male-amplifier	leucine rich repeat kinase 2	GO:0099523	presynaptic cytosol (GO:0099523)	CC
TSC2	male-amplifier	TSC complex subunit 2	GO:0014069	postsynaptic density (GO:0014069)	CC
CDK5	male-amplifier	cyclin dependent kinase 5	GO:0098794	postsynapse (GO:0098794)	CC
RAB3B	male-amplifier	RAB3B, member RAS oncogene family	GO:0098993	anchored component of synaptic vesicle membrane (GO:0098993)	CC
RAPGEF4	male-amplifier	Rap guanine nucleotide exchange factor 4	GO:0014069	postsynaptic density (GO:0014069)	CC
GRIA4	male-amplifier	glutamate ionotropic receptor AMPA type subunit 4	GO:0099061	integral component of postsynaptic density membrane (GO:0099061)	CC
AAK1	male-amplifier	AP2 associated kinase 1	GO:0098793	presynapse (GO:0098793)	CC
PPP1CA	male-amplifier	protein phosphatase 1 catalytic subunit alpha	GO:0098793	presynapse (GO:0098793)	CC
PPP1CA	male-amplifier	protein phosphatase 1 catalytic subunit alpha	GO:0098794	postsynapse (GO:0098794)	CC
LRRK2	male-amplifier	leucine rich repeat kinase 2	GO:0099523	presynaptic cytosol (GO:0099523)	CC
DRD3	male-amplifier	dopamine receptor D3	GO:0099061	integral component of postsynaptic density membrane (GO:0099061)	CC
YWHAH	male-amplifier	tyrosine 3-monooxygenase/tryptophan 5-monooxygenase activation protein eta	GO:0045202	synapse (GO:0045202)	CC
EPN1	male-amplifier	epsin 1	GO:0098794	postsynapse (GO:0098794)	CC
NRGN	male-amplifier	neurogranin	GO:0098794	postsynapse (GO:0098794)	CC
NR3C1	male-amplifier	nuclear receptor subfamily 3 group C member 1	GO:0099092	postsynaptic density, intracellular component (GO:0099092)	CC
NRGN	male-amplifier	neurogranin	GO:0045211	postsynaptic membrane (GO:0045211)	CC
CHRM2	male-amplifier	cholinergic receptor muscarinic 2	GO:0099055	integral component of postsynaptic membrane (GO:0099055)	CC
CHRM2	male-amplifier	cholinergic receptor muscarinic 2	GO:0099056	integral component of presynaptic membrane (GO:0099056)	CC
YWHAH	male-amplifier	tyrosine 3-monooxygenase/tryptophan 5-monooxygenase activation protein eta	GO:0098793	presynapse (GO:0098793)	CC
RGS9	male-amplifier	regulator of G protein signaling 9	GO:0098839	postsynaptic density membrane (GO:0098839)	CC
VPS11	male-amplifier	VPS11 core subunit of CORVET and HOPS complexes	GO:0048786	presynaptic active zone (GO:0048786)	CC
VPS18	male-amplifier	VPS18 core subunit of CORVET and HOPS complexes	GO:0098793	presynapse (GO:0098793)	CC
FAM108A1	male-amplifier	abhydrolase domain containing 17A, depalmitoylase	GO:0099033	anchored component of postsynaptic recycling endosome membrane (GO:0099033)	CC
FAM108A1	male-amplifier	abhydrolase domain containing 17A, depalmitoylase	GO:0099031	anchored component of postsynaptic density membrane (GO:0099031)	CC
SORCS3	male-amplifier	sortilin related VPS10 domain containing receptor 3	GO:0099061	integral component of postsynaptic density membrane (GO:0099061)	CC
VHL	male-amplifier	von Hippel-Lindau tumor suppressor	GO:0014069	postsynaptic density (GO:0014069)	CC
ABL2	male-amplifier	ABL proto-oncogene 2, non-receptor tyrosine kinase	GO:0098794	postsynapse (GO:0098794)	CC
ABL1	male-amplifier	ABL proto-oncogene 1, non-receptor tyrosine kinase	GO:0014069	postsynaptic density (GO:0014069)	CC
ADD1	male-amplifier	adducin 1	GO:0098793	presynapse (GO:0098793)	CC
ADD1	male-amplifier	adducin 1	GO:0098794	postsynapse (GO:0098794)	CC
SLITRK2	male-amplifier	SLIT and NTRK like family member 2	GO:0099055	integral component of postsynaptic membrane (GO:0099055)	CC
RGS9	male-amplifier	regulator of G protein signaling 9	GO:0042734	presynaptic membrane (GO:0042734)	CC
RGS7	male-amplifier	regulator of G protein signaling 7	GO:0045211	postsynaptic membrane (GO:0045211)	CC
CACNG8	male-amplifier	calcium voltage-gated channel auxiliary subunit gamma 8	GO:0099061	integral component of postsynaptic density membrane (GO:0099061)	CC
GDI1	male-amplifier	GDP dissociation inhibitor 1	GO:0099523	presynaptic cytosol (GO:0099523)	CC
PPFIA3	male-amplifier	PTPRF interacting protein alpha 3	GO:0098831	presynaptic active zone cytoplasmic component (GO:0098831)	CC
ERC2	male-amplifier	ELKS/RAB6-interacting/CAST family member 2	GO:0098831	presynaptic active zone cytoplasmic component (GO:0098831)	CC
AP3D1	male-amplifier	adaptor related protein complex 3 subunit delta 1	GO:0098793	presynapse (GO:0098793)	CC
AP3D1	male-amplifier	adaptor related protein complex 3 subunit delta 1	GO:0098794	postsynapse (GO:0098794)	CC
NRXN1	male-amplifier	neurexin 1	GO:0099059	integral component of presynaptic active zone membrane (GO:0099059)	CC
CLSTN1	male-amplifier	calsyntenin 1	GO:0098845	postsynaptic endosome (GO:0098845)	CC
NLGN3	male-amplifier	neuroligin 3	GO:0099060	integral component of postsynaptic specialization membrane (GO:0099060)	CC
GABBR1	male-amplifier	gamma-aminobutyric acid type B receptor subunit 1	GO:0099056	integral component of presynaptic membrane (GO:0099056)	CC
NRG1	male-amplifier	neuregulin 1	GO:0099059	integral component of presynaptic active zone membrane (GO:0099059)	CC
NRG1	male-amplifier	neuregulin 1	GO:0099061	integral component of postsynaptic density membrane (GO:0099061)	CC
FRMPD4	male-amplifier	FERM and PDZ domain containing 4	GO:0014069	postsynaptic density (GO:0014069)	CC
FZD4	male-amplifier	frizzled class receptor 4	GO:0045202	synapse (GO:0045202)	CC
DVL3	male-amplifier	dishevelled segment polarity protein 3	GO:0045202	synapse (GO:0045202)	CC
FZD9	male-amplifier	frizzled class receptor 9	GO:0098794	postsynapse (GO:0098794)	CC
DVL1	male-amplifier	dishevelled segment polarity protein 1	GO:0014069	postsynaptic density (GO:0014069)	CC
CASKIN1	male-amplifier	CASK interacting protein 1	GO:0098793	presynapse (GO:0098793)	CC
KIAA1688	male-amplifier	Rho GTPase activating protein 39	GO:0098794	postsynapse (GO:0098794)	CC
CLSTN1	male-amplifier	calsyntenin 1	GO:0099061	integral component of postsynaptic density membrane (GO:0099061)	CC
CLSTN1	male-amplifier	calsyntenin 1	GO:0099065	integral component of spine apparatus membrane (GO:0099065)	CC
RGS7	male-amplifier	regulator of G protein signaling 7	GO:0098793	presynapse (GO:0098793)	CC
YWHAZ	male-amplifier	tyrosine 3-monooxygenase/tryptophan 5-monooxygenase activation protein zeta	GO:0099572	postsynaptic specialization (GO:0099572)	CC
GPER	male-amplifier	G protein-coupled estrogen receptor 1	GO:0099055	integral component of postsynaptic membrane (GO:0099055)	CC
GPER	male-amplifier	G protein-coupled estrogen receptor 1	GO:0099056	integral component of presynaptic membrane (GO:0099056)	CC
TRIO	male-amplifier	trio Rho guanine nucleotide exchange factor	GO:0098794	postsynapse (GO:0098794)	CC
ZDHHC5	male-amplifier	zinc finger DHHC-type palmitoyltransferase 5	GO:0099091	postsynaptic specialization, intracellular component (GO:0099091)	CC
SH3GLB2	male-amplifier	SH3 domain containing GRB2 like, endophilin B2	GO:0098843	postsynaptic endocytic zone (GO:0098843)	CC
NUMB	male-amplifier	NUMB endocytic adaptor protein	GO:0014069	postsynaptic density (GO:0014069)	CC
DNM3	male-amplifier	dynamin 3	GO:0098844	postsynaptic endocytic zone membrane (GO:0098844)	CC
DNM2	male-amplifier	dynamin 2	GO:0099092	postsynaptic density, intracellular component (GO:0099092)	CC
EPS15	male-amplifier	epidermal growth factor receptor pathway substrate 15	GO:0045202	synapse (GO:0045202)	CC
HSPA8	male-amplifier	heat shock protein family A (Hsp70) member 8	GO:0014069	postsynaptic density (GO:0014069)	CC
HSPA8	male-amplifier	heat shock protein family A (Hsp70) member 8	GO:0098794	postsynapse (GO:0098794)	CC
HSPA8	male-amplifier	heat shock protein family A (Hsp70) member 8	GO:0098793	presynapse (GO:0098793)	CC
MYH10	male-amplifier	myosin heavy chain 10	GO:0098871	postsynaptic actin cytoskeleton (GO:0098871)	CC
SGIP1	male-amplifier	SH3GL interacting endocytic adaptor 1	GO:0098793	presynapse (GO:0098793)	CC
SH3GL1	male-amplifier	SH3 domain containing GRB2 like 1, endophilin A2	GO:0099092	postsynaptic density, intracellular component (GO:0099092)	CC
SH3GL1	male-amplifier	SH3 domain containing GRB2 like 1, endophilin A2	GO:0098793	presynapse (GO:0098793)	CC
PIP5K1C	male-amplifier	phosphatidylinositol-4-phosphate 5-kinase type 1 gamma	GO:0014069	postsynaptic density (GO:0014069)	CC
HSPA8	male-amplifier	heat shock protein family A (Hsp70) member 8	GO:0099634	postsynaptic specialization membrane (GO:0099634)	CC
TRIO	male-amplifier	trio Rho guanine nucleotide exchange factor	GO:0048786	presynaptic active zone (GO:0048786)	CC
ANO1	male-amplifier	anoctamin 1	GO:0099056	integral component of presynaptic membrane (GO:0099056)	CC
ANO2	male-amplifier	anoctamin 2	GO:0099056	integral component of presynaptic membrane (GO:0099056)	CC
TAOK2	male-amplifier	TAO kinase 2	GO:0098794	postsynapse (GO:0098794)	CC
AXIN1	male-amplifier	axin 1	GO:0045202	synapse (GO:0045202)	CC
NPTX2	male-amplifier	neuronal pentraxin 2	GO:0043083	synaptic cleft (GO:0043083)	CC
LHFPL4	male-amplifier	LHFPL tetraspan subfamily member 4	GO:0099572	postsynaptic specialization (GO:0099572)	CC
SEPT7	male-amplifier	septin 7	GO:0150050	postsynaptic septin cytoskeleton (GO:0150050)	CC
DLG5	male-amplifier	discs large MAGUK scaffold protein 5	GO:0014069	postsynaptic density (GO:0014069)	CC
CTBP2	male-amplifier	C-terminal binding protein 2	GO:0098831	presynaptic active zone cytoplasmic component (GO:0098831)	CC
CALD1	male-amplifier	caldesmon 1	GO:0098794	postsynapse (GO:0098794)	CC
CNN3	male-amplifier	calponin 3	GO:0098794	postsynapse (GO:0098794)	CC
COMT	male-amplifier	catechol-O-methyltransferase	GO:0098794	postsynapse (GO:0098794)	CC
TACC3	male-amplifier	transforming acidic coiled-coil containing protein 3	GO:0014069	postsynaptic density (GO:0014069)	CC
HIP1R	male-amplifier	huntingtin interacting protein 1 related	GO:0098794	postsynapse (GO:0098794)	CC
KCNAB2	male-amplifier	potassium voltage-gated channel subfamily A regulatory beta subunit 2	GO:0099061	integral component of postsynaptic density membrane (GO:0099061)	CC
C1QL3	male-amplifier	complement C1q like 3	GO:0043083	synaptic cleft (GO:0043083)	CC
BCL11A	male-amplifier	BCL11 transcription factor A	GO:0098794	postsynapse (GO:0098794)	CC
DICER1	male-amplifier	dicer 1, ribonuclease III	GO:0099092	postsynaptic density, intracellular component (GO:0099092)	CC
RNASEN	male-amplifier	drosha ribonuclease III	GO:0014069	postsynaptic density (GO:0014069)	CC
ADRBK1	male-amplifier	G protein-coupled receptor kinase 2	GO:0014069	postsynaptic density (GO:0014069)	CC
ADRBK1	male-amplifier	G protein-coupled receptor kinase 2	GO:0098793	presynapse (GO:0098793)	CC
MARK2	male-amplifier	microtubule affinity regulating kinase 2	GO:0098794	postsynapse (GO:0098794)	CC
ROR2	male-amplifier	receptor tyrosine kinase like orphan receptor 2	GO:0098794	postsynapse (GO:0098794)	CC
AGAP2	male-amplifier	ArfGAP with GTPase domain, ankyrin repeat and PH domain 2	GO:0098794	postsynapse (GO:0098794)	CC
CNKSR2	male-amplifier	connector enhancer of kinase suppressor of Ras 2	GO:0099147	extrinsic component of postsynaptic density membrane (GO:0099147)	CC
GAD1	male-amplifier	glutamate decarboxylase 1	GO:0098793	presynapse (GO:0098793)	CC
RPL10	male-amplifier	ribosomal protein L10	SYNGO:postsyn_ribosome	postsynaptic ribosome	CC
RPL18	male-amplifier	ribosomal protein L18	SYNGO:postsyn_ribosome	postsynaptic ribosome	CC
RPL22	male-amplifier	ribosomal protein L22	GO:0045202	synapse (GO:0045202)	CC
RPL22	male-amplifier	ribosomal protein L22	SYNGO:postsyn_ribosome	postsynaptic ribosome	CC
RPL35A	male-amplifier	ribosomal protein L35a	GO:0045202	synapse (GO:0045202)	CC
RPL29	male-amplifier	ribosomal protein L29	SYNGO:postsyn_ribosome	postsynaptic ribosome	CC
RPL35A	male-amplifier	ribosomal protein L35a	SYNGO:postsyn_ribosome	postsynaptic ribosome	CC
RPS12	male-amplifier	ribosomal protein S12	GO:0045202	synapse (GO:0045202)	CC
RPS24	male-amplifier	ribosomal protein S24	GO:0045202	synapse (GO:0045202)	CC
RPS12	male-amplifier	ribosomal protein S12	SYNGO:postsyn_ribosome	postsynaptic ribosome	CC
RPS24	male-amplifier	ribosomal protein S24	SYNGO:postsyn_ribosome	postsynaptic ribosome	CC
RPS20	male-amplifier	ribosomal protein S20	SYNGO:postsyn_ribosome	postsynaptic ribosome	CC
RPS3A	male-amplifier	ribosomal protein S3A	SYNGO:postsyn_ribosome	postsynaptic ribosome	CC
RPSA	male-amplifier	ribosomal protein SA	SYNGO:postsyn_ribosome	postsynaptic ribosome	CC
RPL10	male-amplifier	ribosomal protein L10	SYNGO:presyn_ribosome	presynaptic ribosome	CC
RPL18	male-amplifier	ribosomal protein L18	SYNGO:presyn_ribosome	presynaptic ribosome	CC
RPL29	male-amplifier	ribosomal protein L29	SYNGO:presyn_ribosome	presynaptic ribosome	CC
RPL35A	male-amplifier	ribosomal protein L35a	SYNGO:presyn_ribosome	presynaptic ribosome	CC
RPS12	male-amplifier	ribosomal protein S12	SYNGO:presyn_ribosome	presynaptic ribosome	CC
RPS24	male-amplifier	ribosomal protein S24	SYNGO:presyn_ribosome	presynaptic ribosome	CC
FILIP1	male-amplifier	filamin A interacting protein 1	GO:0098794	postsynapse (GO:0098794)	CC
CTTN	male-amplifier	cortactin	GO:0098794	postsynapse (GO:0098794)	CC
DMD	male-amplifier	dystrophin	GO:0099572	postsynaptic specialization (GO:0099572)	CC
SEMA4B	male-amplifier	semaphorin 4B	GO:0099061	integral component of postsynaptic density membrane (GO:0099061)	CC
NRG1	male-amplifier	neuregulin 1	GO:0098794	postsynapse (GO:0098794)	CC
AKAP1	male-amplifier	A-kinase anchoring protein 1	GO:0099091	postsynaptic specialization, intracellular component (GO:0099091)	CC
PRKACA	male-amplifier	protein kinase cAMP-activated catalytic subunit alpha	GO:0098794	postsynapse (GO:0098794)	CC
ITGA2	male-amplifier	integrin subunit alpha 2	GO:0098793	presynapse (GO:0098793)	CC
IGF1	male-amplifier	insulin like growth factor 1	GO:0099013	neuronal dense core vesicle lumen (GO:0099013)	CC
PRKACA	male-amplifier	protein kinase cAMP-activated catalytic subunit alpha	GO:0098793	presynapse (GO:0098793)	CC
ERBB2	male-amplifier	erb-b2 receptor tyrosine kinase 2	GO:0099056	integral component of presynaptic membrane (GO:0099056)	CC
OPHN1	male-amplifier	oligophrenin 1	GO:0098793	presynapse (GO:0098793)	CC
AGAP3	male-amplifier	ArfGAP with GTPase domain, ankyrin repeat and PH domain 3	GO:0014069	postsynaptic density (GO:0014069)	CC
ARHGEF2	male-amplifier	Rho/Rac guanine nucleotide exchange factor 2	GO:0098794	postsynapse (GO:0098794)	CC
LAMA5	male-amplifier	laminin subunit alpha 5	GO:0098965	extracellular matrix of synaptic cleft (GO:0098965)	CC
ITGB4	male-amplifier	integrin subunit beta 4	GO:0099055	integral component of postsynaptic membrane (GO:0099055)	CC
PTK2	male-amplifier	protein tyrosine kinase 2	GO:0098794	postsynapse (GO:0098794)	CC
PTK2B	male-amplifier	protein tyrosine kinase 2 beta	GO:0099092	postsynaptic density, intracellular component (GO:0099092)	CC
PTK2B	male-amplifier	protein tyrosine kinase 2 beta	GO:0099092	postsynaptic density, intracellular component (GO:0099092)	CC
PTK2B	male-amplifier	protein tyrosine kinase 2 beta	GO:0098793	presynapse (GO:0098793)	CC
EIF1AX	male-amplifier	eukaryotic translation initiation factor 1A X-linked	GO:0045202	synapse (GO:0045202)	CC
EIF4G3	male-amplifier	eukaryotic translation initiation factor 4 gamma 3	GO:0045202	synapse (GO:0045202)	CC
EIF6	male-amplifier	eukaryotic translation initiation factor 6	GO:0045202	synapse (GO:0045202)	CC
HNRNPF	male-amplifier	heterogeneous nuclear ribonucleoprotein F	GO:0045202	synapse (GO:0045202)	CC
HNRNPUL2	male-amplifier	heterogeneous nuclear ribonucleoprotein U like 2	GO:0045202	synapse (GO:0045202)	CC
PAK6	male-amplifier	p21 (RAC1) activated kinase 6	GO:0014069	postsynaptic density (GO:0014069)	CC
RPS6KA1	male-amplifier	ribosomal protein S6 kinase A1	GO:0045202	synapse (GO:0045202)	CC
RPS6KA4	male-amplifier	ribosomal protein S6 kinase A4	GO:0045202	synapse (GO:0045202)	CC
TSC2	male-amplifier	TSC complex subunit 2	GO:0045202	synapse (GO:0045202)	CC
CSDA	male-amplifier	Y-box binding protein 3	GO:0045202	synapse (GO:0045202)	CC
AP2M1	male-amplifier	adaptor related protein complex 2 subunit mu 1	GO:0045202	synapse (GO:0045202)	CC
AP2M1	male-amplifier	adaptor related protein complex 2 subunit mu 1	GO:0098894	extrinsic component of presynaptic endocytic zone membrane (GO:0098894)	CC
EXOC4	male-amplifier	exocyst complex component 4	GO:0099092	postsynaptic density, intracellular component (GO:0099092)	CC
PTPRN2	male-amplifier	protein tyrosine phosphatase receptor type N2	GO:0098793	presynapse (GO:0098793)	CC
PRKAR1B	male-amplifier	protein kinase cAMP-dependent type I regulatory subunit beta	GO:0098794	postsynapse (GO:0098794)	CC
ATP2B1	male-amplifier	ATPase plasma membrane Ca2+ transporting 1	GO:0042734	presynaptic membrane (GO:0042734)	CC
RALA	male-amplifier	RAS like proto-oncogene A	GO:0097060	synaptic membrane (GO:0097060)	CC
LASP1	male-amplifier	LIM and SH3 protein 1	GO:0098794	postsynapse (GO:0098794)	CC
SCRN1	male-amplifier	secernin 1	GO:0098793	presynapse (GO:0098793)	CC
ANO6	male-amplifier	anoctamin 6	GO:0099699	integral component of synaptic membrane (GO:0099699)	CC
CALCA	male-amplifier	calcitonin related polypeptide alpha	GO:0098992	neuronal dense core vesicle (GO:0098992)	CC
ATP8A1	male-amplifier	ATPase phospholipid transporting 8A1	GO:0045202	synapse (GO:0045202)	CC
RTN4	male-amplifier	reticulon 4	GO:0098794	postsynapse (GO:0098794)	CC
RTN4	male-amplifier	reticulon 4	GO:0098794	postsynapse (GO:0098794)	CC
GNAI2	male-amplifier	G protein subunit alpha i2	GO:0098992	neuronal dense core vesicle (GO:0098992)	CC
DVL1	male-amplifier	dishevelled segment polarity protein 1	GO:0098992	neuronal dense core vesicle (GO:0098992)	CC
NPFF	male-amplifier	neuropeptide FF-amide peptide precursor	GO:0098992	neuronal dense core vesicle (GO:0098992)	CC
FAM81A	male-amplifier	family with sequence similarity 81 member A	GO:0099092	postsynaptic density, intracellular component (GO:0099092)	CC
VAC14	male-amplifier	VAC14 component of PIKFYVE complex	GO:0098830	presynaptic endosome (GO:0098830)	CC
SNX9	male-amplifier	sorting nexin 9	GO:0098793	presynapse (GO:0098793)	CC
ARL6IP5	male-amplifier	ADP ribosylation factor like GTPase 6 interacting protein 5	GO:0099523	presynaptic cytosol (GO:0099523)	CC
CTBP1	male-amplifier	C-terminal binding protein 1	GO:0098894	extrinsic component of presynaptic endocytic zone membrane (GO:0098894)	CC
TBC1D24	male-amplifier	TBC1 domain family member 24	GO:0045202	synapse (GO:0045202)	CC
CD2AP	male-amplifier	CD2 associated protein	GO:0098793	presynapse (GO:0098793)	CC
VTI1A	male-amplifier	vesicle transport through interaction with t-SNAREs 1A	GO:0008021	synaptic vesicle (GO:0008021)	CC
RAB11FIP3	male-amplifier	RAB11 family interacting protein 3	GO:0098944	postsynaptic recycling endosome membrane (GO:0098944)	CC
PPFIA3	male-amplifier	PTPRF interacting protein alpha 3	GO:0048786	presynaptic active zone (GO:0048786)	CC
PPFIA1	male-amplifier	PTPRF interacting protein alpha 1	GO:0097444	spine apparatus (GO:0097444)	CC
APLP2	male-amplifier	amyloid beta precursor like protein 2	GO:0097444	spine apparatus (GO:0097444)	CC
IL1RAP	male-amplifier	interleukin 1 receptor accessory protein	GO:0045202	synapse (GO:0045202)	CC
NTRK2	male-amplifier	neurotrophic receptor tyrosine kinase 2	GO:0045211	postsynaptic membrane (GO:0045211)	CC
DLGAP2	male-amplifier	DLG associated protein 2	GO:0099092	postsynaptic density, intracellular component (GO:0099092)	CC
ATP6V0D1	male-amplifier	ATPase H+ transporting V0 subunit d1	GO:0030285	integral component of synaptic vesicle membrane (GO:0030285)	CC
GRN	male-amplifier	granulin precursor	GO:0045202	synapse (GO:0045202)	CC
CACNA1B	male-amplifier	calcium voltage-gated channel subunit alpha1 B	GO:0048786	presynaptic active zone (GO:0048786)	CC
PRAF2	male-amplifier	PRA1 domain family member 2	GO:0098793	presynapse (GO:0098793)	CC
CACNA1A	male-amplifier	calcium voltage-gated channel subunit alpha1 A	GO:0099059	integral component of presynaptic active zone membrane (GO:0099059)	CC
CD44	male-amplifier	CD44 molecule (Indian blood group)	GO:0098794	postsynapse (GO:0098794)	CC
CD44	male-amplifier	CD44 molecule (Indian blood group)	GO:0098793	presynapse (GO:0098793)	CC
CACNA1D	male-amplifier	calcium voltage-gated channel subunit alpha1 D	GO:0099055	integral component of postsynaptic membrane (GO:0099055)	CC
ATG16L1	male-amplifier	autophagy related 16 like 1	GO:0045202	synapse (GO:0045202)	CC
SQSTM1	male-amplifier	sequestosome 1	GO:0045202	synapse (GO:0045202)	CC
DAAM1	male-amplifier	dishevelled associated activator of morphogenesis 1	GO:0045202	synapse (GO:0045202)	CC
SIPA1L2	male-amplifier	signal induced proliferation associated 1 like 2	GO:0098793	presynapse (GO:0098793)	CC
SIPA1L2	male-amplifier	signal induced proliferation associated 1 like 2	GO:0099092	postsynaptic density, intracellular component (GO:0099092)	CC
DIP2A	male-amplifier	disco interacting protein 2 homolog A	GO:0098794	postsynapse (GO:0098794)	CC
MAP1LC3B	male-amplifier	microtubule associated protein 1 light chain 3 beta	GO:0098793	presynapse (GO:0098793)	CC
SHH	male-amplifier	sonic hedgehog signaling molecule	GO:0098793	presynapse (GO:0098793)	CC
SHH	male-amplifier	sonic hedgehog signaling molecule	GO:0098794	postsynapse (GO:0098794)	CC
PTCH1	male-amplifier	patched 1	GO:0099055	integral component of postsynaptic membrane (GO:0099055)	CC
SMO	male-amplifier	smoothened, frizzled class receptor	GO:0098794	postsynapse (GO:0098794)	CC
AP2A2	male-amplifier	adaptor related protein complex 2 subunit alpha 2	GO:0045202	synapse (GO:0045202)	CC
OPCML	male-amplifier	opioid binding protein/cell adhesion molecule like	GO:0014069	postsynaptic density (GO:0014069)	CC
NTM	male-amplifier	neurotrimin	GO:0099029	anchored component of presynaptic active zone membrane (GO:0099029)	CC
NTM	male-amplifier	neurotrimin	GO:0099031	anchored component of postsynaptic density membrane (GO:0099031)	CC
TRAPPC4	male-amplifier	trafficking protein particle complex subunit 4	GO:0098839	postsynaptic density membrane (GO:0098839)	CC
TRAPPC4	male-amplifier	trafficking protein particle complex subunit 4	GO:0048786	presynaptic active zone (GO:0048786)	CC
EHD1	male-amplifier	EH domain containing 1	GO:0048786	presynaptic active zone (GO:0048786)	CC
SNAPIN	male-amplifier	SNAP associated protein	GO:0098793	presynapse (GO:0098793)	CC
GRIK3	male-amplifier	glutamate ionotropic receptor kainate type subunit 3	GO:0099056	integral component of presynaptic membrane (GO:0099056)	CC
GRIK3	male-amplifier	glutamate ionotropic receptor kainate type subunit 3	GO:0099061	integral component of postsynaptic density membrane (GO:0099061)	CC
ROBO2	male-amplifier	roundabout guidance receptor 2	GO:0099061	integral component of postsynaptic density membrane (GO:0099061)	CC
VPS52	male-amplifier	VPS52 subunit of GARP complex	GO:0098793	presynapse (GO:0098793)	CC
VPS52	male-amplifier	VPS52 subunit of GARP complex	GO:0098794	postsynapse (GO:0098794)	CC
ICAM5	male-amplifier	intercellular adhesion molecule 5	GO:0098794	postsynapse (GO:0098794)	CC
ICAM5	male-amplifier	intercellular adhesion molecule 5	GO:0098794	postsynapse (GO:0098794)	CC
BIN1	male-amplifier	bridging integrator 1	GO:0098794	postsynapse (GO:0098794)	CC
BIN1	male-amplifier	bridging integrator 1	GO:0098793	presynapse (GO:0098793)	CC
ROCK2	male-amplifier	Rho associated coiled-coil containing protein kinase 2	GO:0048786	presynaptic active zone (GO:0048786)	CC
ROCK2	male-amplifier	Rho associated coiled-coil containing protein kinase 2	GO:0014069	postsynaptic density (GO:0014069)	CC
ACTN1	male-amplifier	actinin alpha 1	GO:0045202	synapse (GO:0045202)	CC
SRCIN1	male-amplifier	SRC kinase signaling inhibitor 1	GO:0098793	presynapse (GO:0098793)	CC
SRCIN1	male-amplifier	SRC kinase signaling inhibitor 1	GO:0098793	presynapse (GO:0098793)	CC
SRCIN1	male-amplifier	SRC kinase signaling inhibitor 1	GO:0098794	postsynapse (GO:0098794)	CC
SRCIN1	male-amplifier	SRC kinase signaling inhibitor 1	GO:0098794	postsynapse (GO:0098794)	CC
NTRK2	male-amplifier	neurotrophic receptor tyrosine kinase 2	GO:0098793	presynapse (GO:0098793)	CC
NOTCH1	male-amplifier	notch receptor 1	GO:0099061	integral component of postsynaptic density membrane (GO:0099061)	CC
TNK2	male-amplifier	tyrosine kinase non receptor 2	GO:0099523	presynaptic cytosol (GO:0099523)	CC
TNK2	male-amplifier	tyrosine kinase non receptor 2	GO:0099524	postsynaptic cytosol (GO:0099524)	CC
STAU2	male-amplifier	staufen double-stranded RNA binding protein 2	GO:0098794	postsynapse (GO:0098794)	CC
CALM1	male-amplifier	calmodulin 1	GO:0099523	presynaptic cytosol (GO:0099523)	CC
MYLK	male-amplifier	myosin light chain kinase	GO:0045202	synapse (GO:0045202)	CC
GIT2	male-amplifier	GIT ArfGAP 2	GO:0098793	presynapse (GO:0098793)	CC
GIT1	male-amplifier	GIT ArfGAP 1	GO:0098793	presynapse (GO:0098793)	CC
MPP1	male-amplifier	MAGUK p55 scaffold protein 1	GO:0098794	postsynapse (GO:0098794)	CC
CALM3	male-amplifier	calmodulin 3	GO:0099523	presynaptic cytosol (GO:0099523)	CC
CALM1	male-amplifier	calmodulin 1	GO:0099524	postsynaptic cytosol (GO:0099524)	CC
CALM3	male-amplifier	calmodulin 3	GO:0099524	postsynaptic cytosol (GO:0099524)	CC
ITSN1	male-amplifier	intersectin 1	GO:0098843	postsynaptic endocytic zone (GO:0098843)	CC
EPS15	male-amplifier	epidermal growth factor receptor pathway substrate 15	GO:0098843	postsynaptic endocytic zone (GO:0098843)	CC
HIP1R	male-amplifier	huntingtin interacting protein 1 related	GO:0098843	postsynaptic endocytic zone (GO:0098843)	CC
DNM2	male-amplifier	dynamin 2	GO:0098843	postsynaptic endocytic zone (GO:0098843)	CC
EPN2	male-amplifier	epsin 2	GO:0098843	postsynaptic endocytic zone (GO:0098843)	CC
FCHO1	male-amplifier	FCH and mu domain containing endocytic adaptor 1	GO:0098843	postsynaptic endocytic zone (GO:0098843)	CC
CAPN1	male-amplifier	calpain 1	GO:0098794	postsynapse (GO:0098794)	CC
CAPN1	male-amplifier	calpain 1	GO:0014069	postsynaptic density (GO:0014069)	CC
CAPN1	male-amplifier	calpain 1	GO:0098793	presynapse (GO:0098793)	CC
CAPN2	male-amplifier	calpain 2	GO:0098794	postsynapse (GO:0098794)	CC
AP1S1	male-amplifier	adaptor related protein complex 1 subunit sigma 1	GO:0098793	presynapse (GO:0098793)	CC
AP2A2	male-amplifier	adaptor related protein complex 2 subunit alpha 2	GO:0008021	synaptic vesicle (GO:0008021)	CC
AP2M1	male-amplifier	adaptor related protein complex 2 subunit mu 1	GO:0008021	synaptic vesicle (GO:0008021)	CC
SGIP1	male-amplifier	SH3GL interacting endocytic adaptor 1	GO:0098793	presynapse (GO:0098793)	CC
AGAP1	male-amplifier	ArfGAP with GTPase domain, ankyrin repeat and PH domain 1	GO:0098845	postsynaptic endosome (GO:0098845)	CC
NXPH1	male-amplifier	neurexophilin 1	GO:0043083	synaptic cleft (GO:0043083)	CC
CACNA2D3	male-amplifier	calcium voltage-gated channel auxiliary subunit alpha2delta 3	GO:0099029	anchored component of presynaptic active zone membrane (GO:0099029)	CC
ZDHHC17	male-amplifier	zinc finger DHHC-type palmitoyltransferase 17	GO:0150051	postsynaptic Golgi apparatus (GO:0150051)	CC
ANK3	male-amplifier	ankyrin 3	GO:0098794	postsynapse (GO:0098794)	CC
ANK3	male-amplifier	ankyrin 3	GO:0014069	postsynaptic density (GO:0014069)	CC
PRICKLE1	male-amplifier	prickle planar cell polarity protein 1	GO:0014069	postsynaptic density (GO:0014069)	CC
VANGL2	male-amplifier	VANGL planar cell polarity protein 2	GO:0099061	integral component of postsynaptic density membrane (GO:0099061)	CC
VANGL2	male-amplifier	VANGL planar cell polarity protein 2	GO:0099061	integral component of postsynaptic density membrane (GO:0099061)	CC
CELSR3	male-amplifier	cadherin EGF LAG seven-pass G-type receptor 3	GO:0099061	integral component of postsynaptic density membrane (GO:0099061)	CC
CELSR3	male-amplifier	cadherin EGF LAG seven-pass G-type receptor 3	GO:0099059	integral component of presynaptic active zone membrane (GO:0099059)	CC
PDE10A	male-amplifier	phosphodiesterase 10A	GO:0099147	extrinsic component of postsynaptic density membrane (GO:0099147)	CC
OTOF	male-amplifier	otoferlin	GO:0030285	integral component of synaptic vesicle membrane (GO:0030285)	CC
EPB41L1	male-amplifier	erythrocyte membrane protein band 4.1 like 1	GO:0098793	presynapse (GO:0098793)	CC
EPB41L1	male-amplifier	erythrocyte membrane protein band 4.1 like 1	GO:0098794	postsynapse (GO:0098794)	CC
GABARAP	male-amplifier	GABA type A receptor-associated protein	GO:0099091	postsynaptic specialization, intracellular component (GO:0099091)	CC
DAAM1	male-amplifier	dishevelled associated activator of morphogenesis 1	GO:0098793	presynapse (GO:0098793)	CC
RAB11B	male-amplifier	RAB11B, member RAS oncogene family	GO:0098993	anchored component of synaptic vesicle membrane (GO:0098993)	CC
GNAI2	male-amplifier	G protein subunit alpha i2	GO:0098793	presynapse (GO:0098793)	CC
GPSM2	male-amplifier	G protein signaling modulator 2	GO:0014069	postsynaptic density (GO:0014069)	CC
GNG7	male-amplifier	G protein subunit gamma 7	GO:0030672	synaptic vesicle membrane (GO:0030672)	CC
GNG7	male-amplifier	G protein subunit gamma 7	GO:0045202	synapse (GO:0045202)	CC
GNG12	male-amplifier	G protein subunit gamma 12	GO:0045202	synapse (GO:0045202)	CC
GNAS	male-amplifier	GNAS complex locus	GO:0098794	postsynapse (GO:0098794)	CC
GNAS	male-amplifier	GNAS complex locus	GO:0098793	presynapse (GO:0098793)	CC
SRGAP2	male-amplifier	SLIT-ROBO Rho GTPase activating protein 2	GO:0014069	postsynaptic density (GO:0014069)	CC
MDGA1	male-amplifier	MAM domain containing glycosylphosphatidylinositol anchor 1	GO:0099031	anchored component of postsynaptic density membrane (GO:0099031)	CC
DMD	male-amplifier	dystrophin	GO:0098794	postsynapse (GO:0098794)	CC
DTNB	male-amplifier	dystrobrevin beta	GO:0098794	postsynapse (GO:0098794)	CC
LRP4	male-amplifier	LDL receptor related protein 4	GO:0045202	synapse (GO:0045202)	CC
NPTX2	male-amplifier	neuronal pentraxin 2	GO:0045202	synapse (GO:0045202)	CC
NPTX2	male-amplifier	neuronal pentraxin 2	GO:0098793	presynapse (GO:0098793)	CC
CDC42	male-amplifier	cell division cycle 42	GO:0098794	postsynapse (GO:0098794)	CC
TACR1	male-amplifier	tachykinin receptor 1	GO:0099055	integral component of postsynaptic membrane (GO:0099055)	CC
CRTAC1	male-amplifier	cartilage acidic protein 1	GO:0014069	postsynaptic density (GO:0014069)	CC
LNX1	male-amplifier	ligand of numb-protein X 1	GO:0098794	postsynapse (GO:0098794)	CC
CBLN4	male-amplifier	cerebellin 4 precursor	GO:0043083	synaptic cleft (GO:0043083)	CC
IGSF21	male-amplifier	immunoglobin superfamily member 21	GO:0099031	anchored component of postsynaptic density membrane (GO:0099031)	CC
RGS7	male-amplifier	regulator of G protein signaling 7	GO:0045211	postsynaptic membrane (GO:0045211)	CC
RGS7	male-amplifier	regulator of G protein signaling 7	GO:0042734	presynaptic membrane (GO:0042734)	CC
VTI1A	male-amplifier	vesicle transport through interaction with t-SNAREs 1A	GO:0030285	integral component of synaptic vesicle membrane (GO:0030285)	CC
RELN	male-amplifier	reelin	GO:0014069	postsynaptic density (GO:0014069)	CC
SH3KBP1	male-amplifier	SH3 domain containing kinase binding protein 1	GO:0045202	synapse (GO:0045202)	CC
SH3KBP1	male-amplifier	SH3 domain containing kinase binding protein 1	GO:0014069	postsynaptic density (GO:0014069)	CC
LRP8	male-amplifier	LDL receptor related protein 8	GO:0099061	integral component of postsynaptic density membrane (GO:0099061)	CC
NOTCH1	male-amplifier	notch receptor 1	GO:0099061	integral component of postsynaptic density membrane (GO:0099061)	CC
HCRT	male-amplifier	hypocretin neuropeptide precursor	GO:0099013	neuronal dense core vesicle lumen (GO:0099013)	CC
INPP4A	male-amplifier	inositol polyphosphate-4-phosphatase type I A	GO:0014069	postsynaptic density (GO:0014069)	CC
ARHGAP12	male-amplifier	Rho GTPase activating protein 12	GO:0098794	postsynapse (GO:0098794)	CC
ACTN1	male-amplifier	actinin alpha 1	GO:0098871	postsynaptic actin cytoskeleton (GO:0098871)	CC
LRP1	male-amplifier	LDL receptor related protein 1	GO:0099061	integral component of postsynaptic density membrane (GO:0099061)	CC
IGSF11	male-amplifier	immunoglobulin superfamily member 11	GO:0099061	integral component of postsynaptic density membrane (GO:0099061)	CC
ASAM	male-amplifier	CXADR like membrane protein	GO:0099055	integral component of postsynaptic membrane (GO:0099055)	CC
EIF2C2	male-amplifier	argonaute RISC catalytic component 2	GO:0098794	postsynapse (GO:0098794)	CC
DNMBP	male-amplifier	dynamin binding protein	GO:0008021	synaptic vesicle (GO:0008021)	CC
EEF1A1	male-amplifier	eukaryotic translation elongation factor 1 alpha 1	GO:0098794	postsynapse (GO:0098794)	CC
ENAH	male-amplifier	ENAH actin regulator	GO:0098794	postsynapse (GO:0098794)	CC
MLLT4	male-amplifier	afadin, adherens junction formation factor	GO:0048787	presynaptic active zone membrane (GO:0048787)	CC
MLLT4	male-amplifier	afadin, adherens junction formation factor	GO:0098839	postsynaptic density membrane (GO:0098839)	CC
CNKSR2	male-amplifier	connector enhancer of kinase suppressor of Ras 2	GO:0099147	extrinsic component of postsynaptic density membrane (GO:0099147)	CC
MKLN1	male-amplifier	muskelin 1	GO:0099164	postsynaptic specialization membrane of symmetric synapse (GO:0099164)	CC
MKLN1	male-amplifier	muskelin 1	GO:0098895	postsynaptic endosome membrane (GO:0098895)	CC
NEURL	male-amplifier	neuralized E3 ubiquitin protein ligase 1	GO:0014069	postsynaptic density (GO:0014069)	CC
ZDHHC5	male-amplifier	zinc finger DHHC-type palmitoyltransferase 5	GO:0098794	postsynapse (GO:0098794)	CC
DPYSL2	male-amplifier	dihydropyrimidinase like 2	GO:0098793	presynapse (GO:0098793)	CC
DPYSL2	male-amplifier	dihydropyrimidinase like 2	GO:0014069	postsynaptic density (GO:0014069)	CC
CC2D1A	male-amplifier	coiled-coil and C2 domain containing 1A	GO:0045202	synapse (GO:0045202)	CC
PDLIM4	male-amplifier	PDZ and LIM domain 4	GO:0014069	postsynaptic density (GO:0014069)	CC
PDLIM5	male-amplifier	PDZ and LIM domain 5	GO:0098794	postsynapse (GO:0098794)	CC
PDLIM5	male-amplifier	PDZ and LIM domain 5	GO:0098793	presynapse (GO:0098793)	CC
PJA2	male-amplifier	praja ring finger ubiquitin ligase 2	GO:0014069	postsynaptic density (GO:0014069)	CC
RGS12	male-amplifier	regulator of G protein signaling 12	GO:0098794	postsynapse (GO:0098794)	CC
NAPEPLD	male-amplifier	N-acyl phosphatidylethanolamine phospholipase D	SYNGO:presyn_ser_membrane	presynaptic SER membrane	CC
NAPEPLD	male-amplifier	N-acyl phosphatidylethanolamine phospholipase D	GO:0042734	presynaptic membrane (GO:0042734)	CC
NAPEPLD	male-amplifier	N-acyl phosphatidylethanolamine phospholipase D	GO:0045211	postsynaptic membrane (GO:0045211)	CC
DAGLA	male-amplifier	diacylglycerol lipase alpha	GO:0099055	integral component of postsynaptic membrane (GO:0099055)	CC
CNRIP1	male-amplifier	cannabinoid receptor interacting protein 1	GO:0098793	presynapse (GO:0098793)	CC
CNR2	male-amplifier	cannabinoid receptor 2	GO:0099055	integral component of postsynaptic membrane (GO:0099055)	CC
DCX	male-amplifier	doublecortin	GO:0098793	presynapse (GO:0098793)	CC
PPP1R9B	male-amplifier	protein phosphatase 1 regulatory subunit 9B	GO:0014069	postsynaptic density (GO:0014069)	CC
PPP1R9B	male-amplifier	protein phosphatase 1 regulatory subunit 9B	GO:0097444	spine apparatus (GO:0097444)	CC
PPP1R9B	male-amplifier	protein phosphatase 1 regulatory subunit 9B	GO:0098890	extrinsic component of postsynaptic membrane (GO:0098890)	CC
PRRT1	male-amplifier	proline rich transmembrane protein 1	GO:0099061	integral component of postsynaptic density membrane (GO:0099061)	CC
CACNG8	male-amplifier	calcium voltage-gated channel auxiliary subunit gamma 8	GO:0099061	integral component of postsynaptic density membrane (GO:0099061)	CC
ELMO1	male-amplifier	engulfment and cell motility 1	GO:0098794	postsynapse (GO:0098794)	CC
ELMO1	male-amplifier	engulfment and cell motility 1	GO:0098794	postsynapse (GO:0098794)	CC
DOCK1	male-amplifier	dedicator of cytokinesis 1	GO:0098794	postsynapse (GO:0098794)	CC
DOCK4	male-amplifier	dedicator of cytokinesis 4	GO:0098794	postsynapse (GO:0098794)	CC
SHARPIN	male-amplifier	SHANK associated RH domain interactor	GO:0014069	postsynaptic density (GO:0014069)	CC
DIXDC1	male-amplifier	DIX domain containing 1	GO:0098794	postsynapse (GO:0098794)	CC
SEPT4	male-amplifier	septin 4	GO:0098793	presynapse (GO:0098793)	CC
SEPT9	male-amplifier	septin 9	GO:0098793	presynapse (GO:0098793)	CC
RNF220	male-amplifier	ring finger protein 220	GO:0098794	postsynapse (GO:0098794)	CC
ACCN2	male-amplifier	acid sensing ion channel subunit 1	GO:0099061	integral component of postsynaptic density membrane (GO:0099061)	CC
SUSD4	male-amplifier	sushi domain containing 4	GO:0099055	integral component of postsynaptic membrane (GO:0099055)	CC
SRPX2	male-amplifier	sushi repeat containing protein X-linked 2	GO:0045202	synapse (GO:0045202)	CC
LIMK1	male-amplifier	LIM domain kinase 1	GO:0098794	postsynapse (GO:0098794)	CC
MIB2	male-amplifier	MIB E3 ubiquitin protein ligase 2	GO:0098794	postsynapse (GO:0098794)	CC
CBLB	male-amplifier	Cbl proto-oncogene B	GO:0098794	postsynapse (GO:0098794)	CC
ACTN4	male-amplifier	actinin alpha 4	GO:0098871	postsynaptic actin cytoskeleton (GO:0098871)	CC
P2RX4	male-amplifier	purinergic receptor P2X 4	GO:0099061	integral component of postsynaptic density membrane (GO:0099061)	CC
KIDINS220	male-amplifier	kinase D interacting substrate 220	GO:0098794	postsynapse (GO:0098794)	CC
CASKIN1	male-amplifier	CASK interacting protein 1	GO:0098794	postsynapse (GO:0098794)	CC
ACTN4	male-amplifier	actinin alpha 4	GO:0098871	postsynaptic actin cytoskeleton (GO:0098871)	CC
MYH10	male-amplifier	myosin heavy chain 10	GO:0098871	postsynaptic actin cytoskeleton (GO:0098871)	CC
SWAP70	male-amplifier	switching B cell complex subunit SWAP70	GO:0098794	postsynapse (GO:0098794)	CC
SRGAP3	male-amplifier	SLIT-ROBO Rho GTPase activating protein 3	GO:0098794	postsynapse (GO:0098794)	CC
CACNA1A	male-amplifier	calcium voltage-gated channel subunit alpha1 A	GO:0099059	integral component of presynaptic active zone membrane (GO:0099059)	CC
CACNA1A	male-amplifier	calcium voltage-gated channel subunit alpha1 A	GO:0099055	integral component of postsynaptic membrane (GO:0099055)	CC
[truncated: 57 more rows]

## Sheet: Survival
Characteristics	Hazard.Ratio	CIL	CIU	P.Value	sex	Cancer	Group
cg24043628	0.937438	0.87	1.01	0.091	Female	BLCA	femaleAmp
cg19395441	1.48261	1.21	1.82	0	Female	BLCA	femaleAmp
cg25748764	0.943315	0.91	0.98	0.002	Female	BLCA	femaleAmp
cg09560658	0.980894	0.94	1.02	0.381	Female	BLCA	maleAmp
cg25658884	1.02757	0.99	1.07	0.142	Female	BLCA	maleAmp
cg26169156	0.957929	0.9	1.01	0.145	Female	BLCA	maleAmp
cg09830022	1.09063	0.98	1.21	0.103	Female	BLCA	maleAmp
cg14214856	1.02019	0.98	1.07	0.37	Female	BLCA	maleAmp
cg06516865	0.999237	0.97	1.03	0.956	Female	BLCA	maleAmp
cg09371620	0.982374	0.83	1.16	0.833	Female	BLCA	maleAmp
cg26802194	1.00104	0.98	1.02	0.922	Female	BLCA	maleAmp
cg14616541	1.03618	0.98	1.09	0.176	Female	BLCA	maleAmp
cg20439473	0.99353	0.95	1.04	0.798	Female	BLCA	maleAmp
cg24043628	1.00977	0.97	1.05	0.615	Male	BLCA	femaleAmp
cg19395441	0.960763	0.86	1.07	0.481	Male	BLCA	femaleAmp
cg25748764	1.00362	0.98	1.03	0.746	Male	BLCA	femaleAmp
cg15871371	1.01757	1	1.03	0.031	Male	BLCA	maleAmp
cg09560658	1.00095	0.97	1.03	0.945	Male	BLCA	maleAmp
cg25658884	0.973243	0.96	0.99	0.001	Male	BLCA	maleAmp
cg26169156	0.996685	0.97	1.02	0.782	Male	BLCA	maleAmp
cg03961010	1.01404	1	1.03	0.095	Male	BLCA	maleAmp
cg09830022	1.0457	0.99	1.11	0.129	Male	BLCA	maleAmp
cg14214856	1.03185	1.01	1.06	0.006	Male	BLCA	maleAmp
cg06516865	1.00969	1	1.02	0.175	Male	BLCA	maleAmp
cg09371620	0.907023	0.84	0.98	0.013	Male	BLCA	maleAmp
cg14616541	1.01546	0.99	1.05	0.315	Male	BLCA	maleAmp
cg20439473	1.02147	0.99	1.06	0.233	Male	BLCA	maleAmp
cg05403469	1.06155	0.97	1.16	0.198	Female	COAD	femaleAmp
cg18026225	1.09502	0.97	1.23	0.13	Female	COAD	femaleAmp
cg01730928	1.07754	0.99	1.17	0.089	Female	COAD	femaleAmp
cg07625783	0.899559	0.84	0.97	0.004	Female	COAD	femaleAmp
cg05711474	1.12647	0.97	1.31	0.122	Female	COAD	femaleAmp
cg08725366	0.920409	0.87	0.98	0.009	Female	COAD	femaleAmp
cg15473904	1.08892	1.02	1.16	0.013	Female	COAD	femaleAmp
cg04549162	1.04401	0.94	1.16	0.424	Female	COAD	femaleAmp
cg19568115	1.0573	0.99	1.13	0.091	Female	COAD	femaleAmp
cg04987071	1.03666	0.99	1.08	0.115	Female	COAD	femaleAmp
cg16339238	1.00399	0.93	1.08	0.917	Female	COAD	maleAmp
cg14519356	0.951462	0.88	1.03	0.201	Female	COAD	maleAmp
cg06042148	1.09609	1	1.2	0.041	Female	COAD	maleAmp
cg15248577	1.04229	0.99	1.1	0.119	Female	COAD	maleAmp
cg26147947	0.981393	0.93	1.03	0.488	Female	COAD	maleAmp
cg19815565	0.930603	0.86	1	0.061	Female	COAD	maleAmp
cg07198552	0.980147	0.92	1.04	0.521	Female	COAD	maleAmp
cg05403469	1.03524	0.99	1.09	0.171	Male	COAD	femaleAmp
cg18026225	0.930772	0.84	1.03	0.148	Male	COAD	femaleAmp
cg24345715	1.05223	1	1.11	0.066	Male	COAD	femaleAmp
cg17187762	1.00048	0.97	1.03	0.974	Male	COAD	femaleAmp
cg01730928	0.994982	0.97	1.02	0.689	Male	COAD	femaleAmp
cg07625783	0.975954	0.91	1.04	0.474	Male	COAD	femaleAmp
cg05711474	1.04436	0.97	1.13	0.27	Male	COAD	femaleAmp
cg08725366	0.992511	0.96	1.03	0.694	Male	COAD	femaleAmp
cg15473904	0.995253	0.92	1.07	0.899	Male	COAD	femaleAmp
cg19568115	0.981795	0.95	1.02	0.319	Male	COAD	femaleAmp
cg04987071	1.01803	0.99	1.05	0.198	Male	COAD	femaleAmp
cg18236571	0.95906	0.88	1.05	0.342	Male	COAD	maleAmp
cg18720506	1.00915	0.97	1.05	0.665	Male	COAD	maleAmp
cg14519356	0.980659	0.93	1.04	0.507	Male	COAD	maleAmp
cg06042148	1.09812	1.02	1.18	0.009	Male	COAD	maleAmp
cg13480493	0.943943	0.92	0.97	0	Male	COAD	maleAmp
cg09454892	1.07486	1.02	1.13	0.009	Male	COAD	maleAmp
cg15248577	1.06449	1.02	1.11	0.006	Male	COAD	maleAmp
cg26147947	0.931239	0.89	0.97	0.001	Male	COAD	maleAmp
cg19815565	1.07462	1.02	1.13	0.003	Male	COAD	maleAmp
cg01479232	1.00986	0.95	1.08	0.766	Male	COAD	maleAmp
cg07198552	1.08563	1.01	1.17	0.025	Male	COAD	maleAmp
cg00129785	1.012	0.97	1.05	0.554	Male	COAD	maleAmp
cg18899220	1.01429	0.98	1.05	0.403	Female	HNSC	maleAmp
cg04322298	0.935074	0.85	1.03	0.175	Female	HNSC	maleAmp
cg18899220	0.977393	0.96	0.99	0.002	Male	HNSC	maleAmp
cg04322298	0.930036	0.9	0.96	0	Male	HNSC	maleAmp
cg01174743	1.24392	1.05	1.48	0.013	Female	KIRC	femaleAmp
cg18675097	1.0802	1.02	1.14	0.008	Female	KIRC	femaleAmp
cg07761358	0.864778	0.78	0.96	0.006	Female	KIRC	femaleAmp
cg05170040	2.00887	0.98	4.13	0.057	Female	KIRC	femaleAmp
cg08383863	1.02137	0.9	1.16	0.747	Female	KIRC	femaleAmp
cg21634628	0.96626	0.85	1.1	0.592	Female	KIRC	femaleAmp
cg20455092	1.03708	0.99	1.08	0.098	Female	KIRC	femaleAmp
cg22795331	0.89179	0.83	0.96	0.001	Female	KIRC	femaleAmp
cg02600514	0.871635	0.71	1.07	0.184	Female	KIRC	femaleAmp
cg06022562	0.703	0.44	1.13	0.143	Female	KIRC	femaleAmp
cg19052272	0.98129	0.94	1.03	0.42	Female	KIRC	maleAmp
cg01840128	1.03867	0.97	1.12	0.306	Female	KIRC	maleAmp
cg20672981	0.921026	0.85	1	0.06	Female	KIRC	maleAmp
cg15972148	1.02556	0.9	1.17	0.699	Female	KIRC	maleAmp
cg02869163	1.06134	0.98	1.15	0.141	Female	KIRC	maleAmp
cg00781047	1.04724	0.99	1.11	0.114	Female	KIRC	maleAmp
cg06231618	1.02876	0.95	1.11	0.485	Female	KIRC	maleAmp
cg13774080	0.963464	0.9	1.03	0.257	Female	KIRC	maleAmp
cg12593746	0.994324	0.89	1.11	0.922	Female	KIRC	maleAmp
cg05106191	1.02126	0.93	1.12	0.652	Female	KIRC	maleAmp
cg05336051	0.851169	0.74	0.98	0.021	Female	KIRC	maleAmp
cg14543780	0.986553	0.91	1.07	0.73	Female	KIRC	maleAmp
cg04663564	0.991699	0.94	1.05	0.767	Female	KIRC	maleAmp
cg05246110	1.06668	0.95	1.19	0.261	Female	KIRC	maleAmp
cg08869244	0.943056	0.88	1.01	0.103	Female	KIRC	maleAmp
cg26543989	1.1972	0.8	1.8	0.387	Female	KIRC	maleAmp
cg25276752	0.992085	0.91	1.09	0.863	Female	KIRC	maleAmp
cg18675097	1.02675	1	1.05	0.05	Male	KIRC	femaleAmp
cg08605301	0.955764	0.93	0.99	0.005	Male	KIRC	femaleAmp
cg07761358	1.00726	0.99	1.03	0.458	Male	KIRC	femaleAmp
cg16953966	0.997319	0.96	1.03	0.884	Male	KIRC	femaleAmp
cg05170040	1.03288	0.81	1.32	0.796	Male	KIRC	femaleAmp
cg08383863	1.01597	0.95	1.09	0.649	Male	KIRC	femaleAmp
cg21634628	1.04938	1.01	1.09	0.008	Male	KIRC	femaleAmp
cg20455092	0.997807	0.98	1.02	0.839	Male	KIRC	femaleAmp
cg22795331	0.971722	0.95	1	0.043	Male	KIRC	femaleAmp
cg15741354	1.0279	1	1.06	0.095	Male	KIRC	femaleAmp
cg02600514	1.03842	0.96	1.13	0.363	Male	KIRC	femaleAmp
cg06022562	0.944696	0.85	1.05	0.282	Male	KIRC	femaleAmp
cg08468689	0.980507	0.94	1.03	0.403	Male	KIRC	femaleAmp
cg19052272	1.02825	1	1.06	0.096	Male	KIRC	maleAmp
cg01840128	1.02118	0.99	1.05	0.152	Male	KIRC	maleAmp
cg20672981	0.949244	0.91	0.99	0.014	Male	KIRC	maleAmp
cg02869163	1.01605	0.98	1.05	0.317	Male	KIRC	maleAmp
cg00781047	1.02226	0.99	1.06	0.201	Male	KIRC	maleAmp
cg13774080	0.977221	0.94	1.01	0.221	Male	KIRC	maleAmp
cg14784348	1.08405	0.98	1.2	0.117	Male	KIRC	maleAmp
cg12593746	1.02847	0.99	1.07	0.151	Male	KIRC	maleAmp
cg05336051	0.986499	0.95	1.02	0.478	Male	KIRC	maleAmp
cg14543780	1.07225	1.03	1.12	0.001	Male	KIRC	maleAmp
cg05246110	0.957408	0.93	0.98	0.003	Male	KIRC	maleAmp
cg26543989	1.14801	0.97	1.36	0.109	Male	KIRC	maleAmp
cg25276752	1.03737	1	1.07	0.025	Male	KIRC	maleAmp
cg18672030	1.57275	1.11	2.23	0.011	Female	KIRP	femaleAmp
cg06169065	0.93672	0.89	0.98	0.006	Female	KIRP	femaleAmp
cg11116086	1.09193	1.02	1.17	0.013	Female	KIRP	femaleAmp
cg01213134	1.0718	0.75	1.52	0.699	Female	KIRP	femaleAmp
cg18672030	1.18952	0.98	1.44	0.08	Male	KIRP	femaleAmp
cg06169065	0.989669	0.96	1.02	0.441	Male	KIRP	femaleAmp
cg10442101	1.00608	0.99	1.03	0.56	Male	KIRP	femaleAmp
cg11116086	0.974967	0.92	1.03	0.349	Male	KIRP	femaleAmp
cg01213134	1.08423	0.93	1.26	0.291	Male	KIRP	femaleAmp
cg02364408	0.972213	0.92	1.03	0.341	Male	KIRP	femaleAmp
cg27038472	0.925674	0.84	1.02	0.132	Male	KIRP	femaleAmp
cg13225830	0.981091	0.97	0.99	0.002	Female	LIHC	femaleAmp
cg04260955	0.955812	0.9	1.01	0.105	Female	LIHC	femaleAmp
cg13225830	0.996726	0.99	1.01	0.508	Male	LIHC	femaleAmp
cg04260955	0.98773	0.92	1.06	0.737	Male	LIHC	femaleAmp
cg13946767	0.997869	0.94	1.06	0.948	Female	LUAD	femaleAmp
cg21270243	1.04595	1.01	1.09	0.025	Female	LUAD	femaleAmp
cg07394299	0.828612	0.7	0.98	0.027	Female	LUAD	femaleAmp
cg00084798	0.980781	0.96	1.01	0.126	Female	LUAD	femaleAmp
cg13501446	0.883033	0.83	0.94	0	Female	LUAD	femaleAmp
cg02467451	0.962835	0.93	1	0.044	Female	LUAD	femaleAmp
cg04694492	1.05191	0.95	1.16	0.306	Female	LUAD	femaleAmp
cg03177025	0.924556	0.84	1.01	0.091	Female	LUAD	femaleAmp
cg05471495	0.967899	0.91	1.02	0.261	Female	LUAD	femaleAmp
cg19648306	1.00761	0.99	1.03	0.444	Female	LUAD	femaleAmp
cg25332717	0.96236	0.93	1	0.026	Female	LUAD	femaleAmp
cg12558966	0.989669	0.96	1.02	0.45	Female	LUAD	femaleAmp
cg01205299	1.23447	1.08	1.41	0.002	Female	LUAD	femaleAmp
cg20174247	1.0021	0.98	1.02	0.852	Female	LUAD	femaleAmp
cg12640109	0.949085	0.91	0.99	0.011	Female	LUAD	femaleAmp
cg06155414	0.909894	0.85	0.97	0.004	Female	LUAD	femaleAmp
cg21094405	0.996125	0.96	1.03	0.824	Female	LUAD	femaleAmp
cg24085344	0.930198	0.88	0.99	0.015	Female	LUAD	femaleAmp
cg04628369	1.00368	0.99	1.02	0.622	Female	LUAD	femaleAmp
cg02651190	1.05248	0.99	1.12	0.104	Female	LUAD	femaleAmp
cg02582669	1.02445	1	1.05	0.097	Female	LUAD	femaleAmp
cg08875705	1.00846	0.98	1.04	0.534	Female	LUAD	maleAmp
cg08779982	0.942283	0.88	1.01	0.085	Female	LUAD	maleAmp
cg11505026	0.988743	0.94	1.04	0.634	Female	LUAD	maleAmp
cg16622514	1.30198	0.94	1.81	0.117	Female	LUAD	maleAmp
cg23321140	1.01452	0.99	1.04	0.286	Female	LUAD	maleAmp
cg07216425	1.20453	1.02	1.42	0.025	Female	LUAD	maleAmp
cg05406637	0.943348	0.86	1.04	0.241	Female	LUAD	maleAmp
cg09567173	1.04391	0.97	1.12	0.221	Female	LUAD	maleAmp
cg21337881	1.06165	0.97	1.16	0.18	Female	LUAD	maleAmp
cg23709430	0.918897	0.85	1	0.042	Female	LUAD	maleAmp
cg13946767	1.0247	0.97	1.08	0.388	Male	LUAD	femaleAmp
cg21270243	1.01799	0.98	1.05	0.308	Male	LUAD	femaleAmp
cg02037307	0.996648	0.96	1.03	0.859	Male	LUAD	femaleAmp
cg07394299	1.00574	0.84	1.2	0.949	Male	LUAD	femaleAmp
cg00084798	0.972935	0.94	1.01	0.153	Male	LUAD	femaleAmp
cg13501446	0.975368	0.94	1.01	0.122	Male	LUAD	femaleAmp
cg02467451	1.02104	0.98	1.07	0.335	Male	LUAD	femaleAmp
cg04694492	0.976005	0.88	1.08	0.652	Male	LUAD	femaleAmp
cg02697373	1.00783	0.97	1.04	0.645	Male	LUAD	femaleAmp
cg14084456	0.96886	0.8	1.18	0.75	Male	LUAD	femaleAmp
cg03177025	1.0396	0.94	1.15	0.441	Male	LUAD	femaleAmp
cg05471495	1.03001	0.96	1.11	0.43	Male	LUAD	femaleAmp
cg25332717	0.986965	0.95	1.03	0.498	Male	LUAD	femaleAmp
cg25651608	0.987311	0.95	1.02	0.497	Male	LUAD	femaleAmp
cg12558966	1.02592	1	1.06	0.101	Male	LUAD	femaleAmp
cg01205299	0.954268	0.9	1.01	0.126	Male	LUAD	femaleAmp
cg10088890	0.910563	0.78	1.06	0.23	Male	LUAD	femaleAmp
cg20174247	1.01076	0.99	1.03	0.362	Male	LUAD	femaleAmp
cg12640109	0.989896	0.96	1.02	0.521	Male	LUAD	femaleAmp
cg06155414	1.01807	0.94	1.11	0.671	Male	LUAD	femaleAmp
cg21094405	0.997779	0.96	1.04	0.917	Male	LUAD	femaleAmp
cg05413199	1.01402	0.97	1.06	0.535	Male	LUAD	femaleAmp
cg04628369	0.995077	0.98	1.01	0.518	Male	LUAD	femaleAmp
cg02651190	1.01667	0.95	1.08	0.609	Male	LUAD	femaleAmp
cg02582669	0.990874	0.96	1.02	0.575	Male	LUAD	femaleAmp
cg08875705	1.03734	0.98	1.09	0.168	Male	LUAD	maleAmp
cg08779982	1.02602	0.97	1.09	0.37	Male	LUAD	maleAmp
cg11505026	0.932825	0.89	0.98	0.003	Male	LUAD	maleAmp
cg16622514	1.15221	0.8	1.65	0.441	Male	LUAD	maleAmp
cg19753607	1.20846	1.03	1.41	0.017	Male	LUAD	maleAmp
cg23321140	1.04521	1.01	1.08	0.007	Male	LUAD	maleAmp
cg07216425	0.91601	0.75	1.12	0.391	Male	LUAD	maleAmp
cg05406637	1.15376	1.04	1.27	0.005	Male	LUAD	maleAmp
cg21337881	1.06018	0.97	1.16	0.208	Male	LUAD	maleAmp
cg23709430	1.06334	0.96	1.17	0.226	Male	LUAD	maleAmp
cg24411961	0.99873	0.95	1.05	0.963	Female	LUSC	maleAmp
cg25140531	1.03507	0.83	1.28	0.753	Female	LUSC	maleAmp
cg24700547	1.07135	0.77	1.48	0.679	Female	LUSC	maleAmp
cg10761372	0.94435	0.75	1.18	0.62	Female	LUSC	maleAmp
cg21026469	0.93584	0.82	1.07	0.324	Female	LUSC	maleAmp
cg10804656	0.939537	0.87	1.02	0.117	Female	LUSC	maleAmp
cg15262954	1.00854	0.97	1.05	0.655	Female	LUSC	maleAmp
cg21173447	0.958395	0.9	1.02	0.169	Female	LUSC	maleAmp
cg00191052	1.00463	0.97	1.04	0.816	Female	LUSC	maleAmp
cg18150584	1.0199	0.99	1.05	0.212	Female	LUSC	maleAmp
cg12927730	0.998177	0.91	1.09	0.969	Female	LUSC	maleAmp
cg08206079	1.03611	0.96	1.12	0.354	Female	LUSC	maleAmp
cg26300517	0.979617	0.94	1.02	0.357	Female	LUSC	maleAmp
cg25693349	0.965211	0.9	1.03	0.296	Female	LUSC	maleAmp
cg07933234	1.00093	0.95	1.06	0.975	Female	LUSC	maleAmp
cg15227994	1.00613	0.96	1.05	0.799	Female	LUSC	maleAmp
cg20654468	0.995779	0.96	1.04	0.835	Female	LUSC	maleAmp
cg21582112	1.0122	0.97	1.06	0.582	Female	LUSC	maleAmp
cg21870229	1.02844	1	1.06	0.058	Female	LUSC	maleAmp
cg20337753	0.761765	0.55	1.05	0.101	Female	LUSC	maleAmp
cg24411961	1.02514	1	1.05	0.07	Male	LUSC	maleAmp
cg25140531	0.934732	0.88	1	0.044	Male	LUSC	maleAmp
cg24700547	0.946578	0.88	1.02	0.153	Male	LUSC	maleAmp
cg10761372	0.988905	0.88	1.11	0.851	Male	LUSC	maleAmp
cg21026469	0.981979	0.94	1.02	0.39	Male	LUSC	maleAmp
cg10804656	0.960159	0.94	0.98	0.001	Male	LUSC	maleAmp
cg15262954	1.00812	0.99	1.03	0.385	Male	LUSC	maleAmp
cg21173447	0.967495	0.94	0.99	0.016	Male	LUSC	maleAmp
cg00191052	0.996097	0.98	1.01	0.576	Male	LUSC	maleAmp
cg18150584	1.01537	1	1.03	0.085	Male	LUSC	maleAmp
cg12927730	1.05506	1.01	1.11	0.026	Male	LUSC	maleAmp
cg21897034	1.03222	1.01	1.05	0.004	Male	LUSC	maleAmp
cg08206079	0.95312	0.92	0.99	0.007	Male	LUSC	maleAmp
cg26300517	1.02025	1	1.04	0.054	Male	LUSC	maleAmp
cg25693349	1.00512	0.97	1.04	0.754	Male	LUSC	maleAmp
cg07265444	0.988209	0.97	1	0.147	Male	LUSC	maleAmp
cg07933234	0.985207	0.97	1	0.074	Male	LUSC	maleAmp
cg15227994	1.01096	0.99	1.03	0.237	Male	LUSC	maleAmp
cg20654468	1.0083	0.99	1.03	0.423	Male	LUSC	maleAmp
cg21533897	1.04571	1.01	1.08	0.004	Male	LUSC	maleAmp
cg21582112	1.02059	1	1.04	0.051	Male	LUSC	maleAmp
cg13977597	1.03846	1	1.08	0.036	Male	LUSC	maleAmp
cg21870229	0.991476	0.98	1.01	0.3	Male	LUSC	maleAmp
cg20337753	1.5672	1.34	1.84	0	Male	LUSC	maleAmp
cg00522231	0.707118	0.53	0.94	0.015	Female	THCA	femaleAmp
cg00590639	0.604159	0.39	0.93	0.021	Female	THCA	femaleAmp
cg23920246	0.926932	0.8	1.07	0.293	Female	THCA	femaleAmp
cg22505962	0.58521	0.37	0.92	0.02	Female	THCA	femaleAmp
cg11936556	1.47214	0.99	2.2	0.058	Female	THCA	femaleAmp
cg18775149	1.0646	0.91	1.25	0.442	Female	THCA	femaleAmp
cg06672250	0.521067	0.3	0.9	0.019	Female	THCA	femaleAmp
cg18416503	0.64151	0.4	1.03	0.066	Female	THCA	femaleAmp
cg06580800	1.08108	0.91	1.29	0.382	Female	THCA	femaleAmp
cg00590639	3.74702	0.52	27.08	0.191	Male	THCA	femaleAmp
cg23920246	1.55659	0.81	3	0.186	Male	THCA	femaleAmp
cg22505962	0.556314	0.3	1.03	0.061	Male	THCA	femaleAmp
cg11936556	1.06035	0.74	1.51	0.745	Male	THCA	femaleAmp
cg18775149	1.19926	0.72	1.98	0.48	Male	THCA	femaleAmp
cg06672250	0.491823	0.25	0.98	0.044	Male	THCA	femaleAmp
cg18416503	0.628192	0.33	1.21	0.166	Male	THCA	femaleAmp
cg04590184	0.959496	0.55	1.67	0.884	Male	THCA	femaleAmp
cg06580800	1.27049	1	1.61	0.045	Male	THCA	femaleAmp

## Sheet: Reccurence
Characteristics	Hazard.Ratio	CIL	CIU	P.Value	sex	Cancer	Group
cg07751793	0.937453	0.88	1	0.048	Female	BLCA	femaleAmp
cg26943189	0.942335	0.89	1	0.047	Female	BLCA	femaleAmp
cg09594291	1.0609	1.02	1.11	0.007	Female	BLCA	femaleAmp
cg06942637	0.931119	0.9	0.97	0	Male	BLCA	maleAmp
cg17187762	1.06758	1.03	1.1	0	Female	COAD	femaleAmp
cg15074974	0.935877	0.9	0.98	0.002	Female	COAD	femaleAmp
cg15074974	0.948219	0.9	1	0.038	Male	COAD	femaleAmp
cg24880787	1.05965	1.02	1.1	0.006	Female	HNSC	femaleAmp
cg02316506	0.968263	0.94	1	0.035	Male	HNSC	maleAmp
cg15067606	0.952542	0.92	0.99	0.007	Male	HNSC	maleAmp
cg15633390	1.06558	1.02	1.11	0.004	Male	HNSC	maleAmp
cg03741862	1.0296	1	1.06	0.026	Male	HNSC	maleAmp
cg19391247	1.02769	1.01	1.05	0.007	Male	HNSC	maleAmp
cg27264388	0.915173	0.87	0.96	0	Male	KIRP	maleAmp
cg15046062	0.979744	0.97	0.99	0.007	Female	LIHC	femaleAmp
cg05160563	0.972678	0.96	0.99	0.001	Female	LIHC	femaleAmp
cg18272377	0.973066	0.96	0.99	0.003	Female	LIHC	femaleAmp
cg14197831	1.03746	1.01	1.07	0.015	Female	LIHC	femaleAmp
cg14197831	1.02088	1	1.04	0.013	Male	LIHC	femaleAmp
cg21724796	1.19968	1.03	1.39	0.018	Male	LIHC	maleAmp
cg25564800	1.10349	1.02	1.19	0.01	Male	LIHC	maleAmp
cg25305776	0.978258	0.97	0.99	0.001	Male	LIHC	maleAmp
cg05545808	1.0967	1.05	1.15	0	Male	LIHC	maleAmp
cg22303418	1.22635	1.09	1.39	0.001	Female	LUAD	femaleAmp
cg19643921	1.0814	1.01	1.16	0.027	Female	LUAD	femaleAmp
cg22303418	0.932772	0.87	0.99	0.033	Male	LUAD	femaleAmp
cg22355537	0.846395	0.73	0.98	0.026	Male	THCA	maleAmp
cg13894813	0.51405	0.35	0.76	0.001	Male	THCA	maleAmp
