# Supplementary material for: Attenuated sex-related DNA methylation differences in cancer highlight the magnitude bias mediating existing disparities
Source: Biol Sex Differ. 2024 Dec 23;15:106. doi: 10.1186/s13293-024-00682-4 (PMC11664931; doi:10.1186/s13293-024-00682-4)
Supplement: Supplementary file 17 — Supplementary material 17. [file 13293_2024_682_MOESM17_ESM.xlsx]

## Sheet: LIHC
Ename	Mname	corr.f	corrpval.f	bonf.f	corr.m	corrpval.m	bonf.m	label
ENSG00000187583	cg04865998	0.481954	1.94035e-08	0.00790117	0.449032	0	0	overlap
ENSG00000187583	cg12663811	-0.497309	5.77165e-09	0.00235024	-0.411754	7.72094e-12	3.144e-06	overlap
ENSG00000187583	cg23207077	0.516178	1.09275e-09	0.000444973	0.368787	1.31383e-09	0.000534996	overlap
ENSG00000188290	cg01729262	0.491103	9.52452e-09	0.00387842	0.275395	7.77208e-06	1	fSpecific
ENSG00000186827	cg03580801	-0.539207	4.70361e-11	1.91533e-05	-0.507842	0	0	overlap
ENSG00000186827	cg09315878	-0.567011	0	0	-0.580475	0	0	overlap
ENSG00000131584	cg04098194	-0.467072	5.84849e-08	0.0238153	-0.127491	0.0407921	1	fSpecific
ENSG00000224051	cg06520508	-0.478568	2.5075e-08	0.0102106	-0.33359	4.85552e-08	0.0197719	overlap
ENSG00000224051	cg17970390	-0.475558	3.14091e-08	0.0127899	-0.320273	1.70443e-07	0.0694052	fSpecific
ENSG00000235098	cg10380643	-0.61584	0	0	-0.60992	0	0	overlap
ENSG00000235098	cg15081886	-0.644344	0	0	-0.632557	0	0	overlap
ENSG00000235098	cg17507949	-0.60035	0	0	-0.421361	1.9825e-12	8.07281e-07	overlap
ENSG00000235098	cg15633699	-0.630458	0	0	-0.65351	0	0	overlap
ENSG00000235098	cg00060374	-0.602599	0	0	-0.646736	0	0	overlap
ENSG00000235098	cg23894219	-0.609653	0	0	-0.660124	0	0	overlap
ENSG00000179403	cg09668627	-0.466206	6.22535e-08	0.0253499	-0.376979	5.30882e-10	0.000216177	overlap
ENSG00000179403	cg26798702	-0.486568	1.36014e-08	0.00553854	-0.47964	0	0	overlap
ENSG00000008130	cg03606098	-0.512989	1.47835e-09	0.000601989	-0.353177	6.87627e-09	0.00280004	overlap
ENSG00000008130	cg15824543	-0.487785	1.23704e-08	0.0050373	-0.318204	2.06082e-07	0.0839173	fSpecific
ENSG00000067606	cg03777518	0.527564	3.23862e-10	0.000131878	0.313735	3.09165e-07	0.125893	fSpecific
ENSG00000067606	cg02361803	0.462452	8.14291e-08	0.0331582	0.478162	0	0	overlap
ENSG00000067606	cg02293396	0.525856	3.96398e-10	0.000161415	0.431909	3.37731e-13	1.37525e-07	overlap
ENSG00000067606	cg01970427	0.604	0	0	0.370028	1.1473e-09	0.000467186	overlap
ENSG00000067606	cg02840585	0.507816	2.36239e-09	0.000961976	0.396981	5.11059e-11	2.08105e-05	overlap
ENSG00000067606	cg06340969	0.472172	4.03415e-08	0.0164272	0.349008	1.05397e-08	0.00429181	overlap
ENSG00000067606	cg06176608	0.48902	1.12287e-08	0.00457237	0.369983	1.15293e-09	0.000469478	overlap
ENSG00000067606	cg08439149	0.475478	3.15962e-08	0.0128661	0.412137	7.33213e-12	2.98567e-06	overlap
ENSG00000067606	cg08108679	0.458661	1.06436e-07	0.0433412	0.478518	0	0	overlap
ENSG00000067606	cg06757383	0.46679	5.96898e-08	0.0243059	0.388323	1.44292e-10	5.87562e-05	overlap
ENSG00000067606	cg07029226	0.471257	4.31438e-08	0.0175683	0.390501	1.11567e-10	4.54305e-05	overlap
ENSG00000067606	cg10334053	0.477382	2.74095e-08	0.0111613	0.368907	1.29673e-09	0.000528033	overlap
ENSG00000067606	cg08732456	0.515853	1.12762e-09	0.000459173	0.454301	0	0	overlap
ENSG00000067606	cg12601506	0.46298	7.84248e-08	0.0319349	0.424777	1.17018e-12	4.76504e-07	overlap
ENSG00000067606	cg13077150	0.494685	7.14752e-09	0.0029105	0.352383	7.46233e-09	0.00303869	overlap
ENSG00000067606	cg13072890	0.477444	2.72836e-08	0.01111	0.261697	2.20959e-05	1	fSpecific
ENSG00000067606	cg12718519	0.473241	3.72881e-08	0.0151839	0.448183	0	0	overlap
ENSG00000067606	cg15468976	0.499637	4.76086e-09	0.00193864	0.449453	0	0	overlap
ENSG00000067606	cg15575834	0.489002	1.1245e-08	0.00457901	0.319404	1.84621e-07	0.0751782	fSpecific
ENSG00000067606	cg16813816	0.53004	2.36896e-10	9.64649e-05	0.392152	9.16481e-11	3.73195e-05	overlap
ENSG00000067606	cg17495046	0.477088	2.80213e-08	0.0114104	0.400527	3.29791e-11	1.34292e-05	overlap
ENSG00000067606	cg17497824	0.485548	1.47215e-08	0.00599464	0.440496	3.05436e-14	1.24375e-08	overlap
ENSG00000067606	cg20250605	0.471975	4.09283e-08	0.0166662	0.371958	9.28136e-10	0.000377941	overlap
ENSG00000067606	cg01514357	0.483533	1.71955e-08	0.00700209	0.421262	2.012e-12	8.19295e-07	overlap
ENSG00000067606	cg00981070	0.457253	1.17462e-07	0.0478309	0.394721	6.72834e-11	2.73981e-05	overlap
ENSG00000067606	cg22626579	0.4782	2.57797e-08	0.0104976	0.3774	5.06328e-10	0.000206179	overlap
ENSG00000067606	cg21282837	0.51828	8.89232e-10	0.000362099	0.458132	0	0	overlap
ENSG00000067606	cg24138964	0.518962	8.3056e-10	0.000338207	0.482099	0	0	overlap
ENSG00000067606	cg24842354	0.601358	0	0	0.482897	0	0	overlap
ENSG00000067606	cg26910870	0.490243	1.01965e-08	0.00415207	0.415933	4.34976e-12	1.77124e-06	overlap
ENSG00000067606	cg25319188	0.503281	3.50213e-09	0.00142608	0.357522	4.37682e-09	0.00178226	overlap
ENSG00000067606	cg25304754	0.463269	7.68279e-08	0.0312846	0.332998	5.1402e-08	0.0209311	overlap
ENSG00000067606	cg26059839	0.48623	1.39633e-08	0.0056859	0.382482	2.84291e-10	0.000115764	overlap
ENSG00000149527	cg05528623	0.470427	4.5842e-08	0.0186671	0.320681	1.64139e-07	0.0668382	fSpecific
ENSG00000149527	cg06215416	0.504897	3.04853e-09	0.00124138	0.326285	9.73777e-08	0.0396526	overlap
ENSG00000149527	cg05005791	0.466949	5.90059e-08	0.0240274	0.414315	5.44652e-12	2.21784e-06	overlap
ENSG00000149527	cg08615111	0.591152	0	0	0.520109	0	0	overlap
ENSG00000149527	cg12140755	0.583533	0	0	0.248879	5.59099e-05	1	fSpecific
ENSG00000149527	cg12644668	0.460043	9.65696e-08	0.0393235	0.471701	0	0	overlap
ENSG00000149527	cg11332951	0.495146	6.88563e-09	0.00280386	0.376549	5.57152e-10	0.000226875	overlap
ENSG00000149527	cg15029248	0.514144	1.32681e-09	0.000540284	0.249884	5.20715e-05	1	fSpecific
ENSG00000149527	cg15627072	0.518267	8.90321e-10	0.000362542	0.476628	0	0	overlap
ENSG00000149527	cg16648140	0.520129	7.37701e-10	0.000300395	0.415925	4.35487e-12	1.77332e-06	overlap
ENSG00000149527	cg19911801	0.522175	5.95796e-10	0.00024261	0.34679	1.31956e-08	0.0053733	overlap
ENSG00000149527	cg00722329	0.559318	0	0	0.481219	0	0	overlap
ENSG00000149527	cg26783079	0.476147	3.00593e-08	0.0122403	0.371901	9.34016e-10	0.000380335	overlap
ENSG00000142611	cg03226435	0.555859	0	0	0.426312	9.13157e-13	3.71841e-07	overlap
ENSG00000142611	cg01932308	0.600307	0	0	0.459524	0	0	overlap
ENSG00000142611	cg03082523	0.60572	0	0	0.319317	1.86096e-07	0.0757788	fSpecific
ENSG00000142611	cg05712300	0.484061	1.65114e-08	0.00672349	0.370542	1.08444e-09	0.00044159	overlap
ENSG00000142611	cg05790380	0.492725	8.36883e-09	0.00340782	0.430709	4.24507e-13	1.72861e-07	overlap
ENSG00000142611	cg05343184	0.616485	0	0	0.511841	0	0	overlap
ENSG00000142611	cg05641535	0.505174	2.97653e-09	0.00121206	0.352775	7.16712e-09	0.00291848	overlap
ENSG00000142611	cg06379192	0.466882	5.92943e-08	0.0241449	0.411846	7.62628e-12	3.10545e-06	overlap
ENSG00000142611	cg06367135	0.568276	0	0	0.474577	0	0	overlap
ENSG00000142611	cg06348826	0.479822	2.28131e-08	0.00928959	0.392049	9.2788e-11	3.77837e-05	overlap
ENSG00000142611	cg06447122	0.59847	0	0	0.435064	1.73304e-13	7.05703e-08	overlap
ENSG00000142611	cg06099439	0.605598	0	0	0.486499	0	0	overlap
ENSG00000142611	cg04493316	0.512823	1.50132e-09	0.000611342	0.380393	3.60936e-10	0.000146974	overlap
ENSG00000142611	cg07974025	0.480965	2.09206e-08	0.00851895	0.475504	0	0	overlap
ENSG00000142611	cg07956247	0.565837	0	0	0.38265	2.78849e-10	0.000113548	overlap
ENSG00000142611	cg08636115	0.575201	0	0	0.326521	9.52433e-08	0.0387835	overlap
ENSG00000142611	cg08262220	0.556473	0	0	0.52409	0	0	overlap
ENSG00000142611	cg06824308	0.539625	4.19034e-11	1.70632e-05	0.471752	0	0	overlap
ENSG00000142611	cg06617975	0.582661	0	0	0.323157	1.30492e-07	0.0531369	fSpecific
ENSG00000142611	cg07367222	0.537788	6.62768e-11	2.69882e-05	0.476376	0	0	overlap
ENSG00000142611	cg07109490	0.578605	0	0	0.441152	2.09275e-14	8.52175e-09	overlap
ENSG00000142611	cg10201191	0.490304	1.01471e-08	0.00413193	0.408248	1.23008e-11	5.00894e-06	overlap
ENSG00000142611	cg10391102	0.646464	0	0	0.416082	4.25947e-12	1.73447e-06	overlap
ENSG00000142611	cg10952596	0.612104	0	0	0.383221	2.6114e-10	0.000106337	overlap
ENSG00000142611	cg10519004	0.470335	4.61515e-08	0.0187931	0.490054	0	0	overlap
ENSG00000142611	cg10520026	0.483926	1.66839e-08	0.00679375	0.483864	0	0	overlap
ENSG00000142611	cg10696969	0.492449	8.55605e-09	0.00348406	0.465338	0	0	overlap
ENSG00000142611	cg10557907	0.473622	3.62543e-08	0.0147629	0.387588	1.57278e-10	6.40444e-05	overlap
ENSG00000142611	cg09032732	0.456786	1.21356e-07	0.0494166	0.430265	4.60844e-13	1.87657e-07	overlap
ENSG00000142611	cg09221035	0.507558	2.41686e-09	0.000984156	0.403263	2.33789e-11	9.51998e-06	overlap
ENSG00000142611	cg08947445	0.462464	8.1358e-08	0.0331293	0.285839	3.37575e-06	1	fSpecific
ENSG00000142611	cg12635919	0.465677	6.46646e-08	0.0263317	0.466483	0	0	overlap
ENSG00000142611	cg12096707	0.476639	2.89767e-08	0.0117994	0.414308	5.45229e-12	2.2202e-06	overlap
ENSG00000142611	cg12268236	0.582814	0	0	0.352147	7.64584e-09	0.00311342	overlap
ENSG00000142611	cg13152158	0.524522	4.61272e-10	0.000187832	0.437927	8.17621e-14	3.32939e-08	overlap
ENSG00000142611	cg12660813	0.642513	0	0	0.510767	0	0	overlap
ENSG00000142611	cg11113363	0.476995	2.82152e-08	0.0114893	0.399455	3.76788e-11	1.5343e-05	overlap
ENSG00000142611	cg11837181	0.609346	0	0	0.456045	0	0	overlap
ENSG00000142611	cg11710123	0.497874	5.50948e-09	0.00224348	0.375478	6.2805e-10	0.000255745	overlap
ENSG00000142611	cg14852736	0.458863	1.04931e-07	0.0427284	0.42151	1.93846e-12	7.89349e-07	overlap
ENSG00000142611	cg15059176	0.496799	6.01807e-09	0.00245058	0.354074	6.26738e-09	0.0025521	overlap
ENSG00000142611	cg14969646	0.557942	0	0	0.410348	9.32149e-12	3.79575e-06	overlap
ENSG00000142611	cg14516243	0.480528	2.16247e-08	0.00880568	0.457146	0	0	overlap
ENSG00000142611	cg14561530	0.458163	1.10218e-07	0.0448812	0.383858	2.42654e-10	9.88097e-05	overlap
ENSG00000142611	cg13460934	0.525548	4.10669e-10	0.000167226	0.460696	0	0	overlap
ENSG00000142611	cg13692649	0.513591	1.39756e-09	0.000569093	0.370302	1.11331e-09	0.000453345	overlap
ENSG00000142611	cg13789673	0.469241	4.99798e-08	0.020352	0.459747	0	0	overlap
ENSG00000142611	cg13393782	0.469432	4.92921e-08	0.0200719	0.482166	0	0	overlap
ENSG00000142611	cg14030836	0.498433	5.26107e-09	0.00214233	0.440695	2.75039e-14	1.11997e-08	overlap
ENSG00000142611	cg14169886	0.573032	0	0	0.425243	1.0863e-12	4.42347e-07	overlap
ENSG00000142611	cg17137218	0.522968	5.4724e-10	0.000222839	0.364325	2.12819e-09	0.000866608	overlap
ENSG00000142611	cg16710099	0.522255	5.90749e-10	0.000240556	0.432806	2.82466e-13	1.15021e-07	overlap
ENSG00000142611	cg16694785	0.491644	9.12363e-09	0.00371518	0.490435	0	0	overlap
ENSG00000142611	cg16926445	0.579029	0	0	0.436699	1.15745e-13	4.7132e-08	overlap
ENSG00000142611	cg17421241	0.508516	2.22009e-09	0.000904028	0.499812	0	0	overlap
ENSG00000142611	cg17412901	0.543773	1.98779e-12	8.09434e-07	0.387939	1.50941e-10	6.14638e-05	overlap
ENSG00000142611	cg16002887	0.53761	6.89011e-11	2.80568e-05	0.488137	0	0	overlap
ENSG00000142611	cg16120249	0.614931	0	0	0.44716	0	0	overlap
ENSG00000142611	cg16265140	0.46019	9.55702e-08	0.0389166	0.393909	7.42226e-11	3.02237e-05	overlap
ENSG00000142611	cg19706803	0.47678	2.86724e-08	0.0116755	0.360061	3.351e-09	0.00136454	overlap
ENSG00000142611	cg19243842	0.578722	0	0	0.477854	0	0	overlap
ENSG00000142611	cg19825974	0.545217	0	0	0.438226	7.45382e-14	3.03522e-08	overlap
ENSG00000142611	cg17861161	0.519576	7.80535e-10	0.000317837	0.433576	2.40796e-13	9.80531e-08	overlap
ENSG00000142611	cg17839324	0.551023	0	0	0.417031	3.72565e-12	1.5171e-06	overlap
ENSG00000142611	cg17890044	0.504141	3.25353e-09	0.00132485	0.422168	1.75507e-12	7.14672e-07	overlap
ENSG00000142611	cg00581154	0.560387	0	0	0.483004	0	0	overlap
ENSG00000142611	cg00790672	0.60024	0	0	0.498923	0	0	overlap
ENSG00000142611	cg00804097	0.578071	0	0	0.393828	7.49513e-11	3.05205e-05	overlap
ENSG00000142611	cg00706913	0.585364	0	0	0.451908	0	0	overlap
ENSG00000142611	cg00701856	0.456694	1.22139e-07	0.0497354	0.388444	1.42256e-10	5.79271e-05	overlap
ENSG00000142611	cg00106196	0.474347	3.43615e-08	0.0139921	0.410835	8.73502e-12	3.55694e-06	overlap
ENSG00000142611	cg00109293	0.465837	6.39264e-08	0.0260311	0.443826	0	0	overlap
ENSG00000142611	cg00030466	0.491687	9.09243e-09	0.00370247	0.389056	1.32363e-10	5.38988e-05	overlap
ENSG00000142611	cg00049709	0.459312	1.01674e-07	0.0414019	0.48525	0	0	overlap
ENSG00000142611	cg00329272	0.502415	3.76998e-09	0.00153515	0.471812	0	0	overlap
ENSG00000142611	cg00168240	0.47718	2.78287e-08	0.011332	0.445091	0	0	overlap
ENSG00000142611	cg00251678	0.532061	1.79376e-10	7.30425e-05	0.399353	3.81617e-11	1.55396e-05	overlap
ENSG00000142611	cg01448098	0.604565	0	0	0.467681	0	0	overlap
ENSG00000142611	cg01196079	0.486286	1.39034e-08	0.00566154	0.472229	0	0	overlap
ENSG00000142611	cg01079872	0.485296	1.50112e-08	0.00611263	0.408576	1.17831e-11	4.79814e-06	overlap
ENSG00000142611	cg01062116	0.508092	2.30527e-09	0.000938714	0.308742	4.82774e-07	0.196587	fSpecific
ENSG00000142611	cg22009660	0.539687	4.11679e-11	1.67637e-05	0.391828	9.52598e-11	3.87902e-05	overlap
ENSG00000142611	cg22029284	0.524571	4.58741e-10	0.000186801	0.491459	0	0	overlap
ENSG00000142611	cg22226775	0.578697	0	0	0.498732	0	0	overlap
ENSG00000142611	cg22688535	0.480418	2.18068e-08	0.00887981	0.312496	3.45567e-07	0.140716	fSpecific
ENSG00000142611	cg22606873	0.513155	1.45569e-09	0.000592763	0.480067	0	0	overlap
ENSG00000142611	cg22608265	0.543134	6.97549e-12	2.84045e-06	0.281673	4.7265e-06	1	fSpecific
ENSG00000142611	cg22497969	0.526661	3.60822e-10	0.000146928	0.466098	0	0	overlap
ENSG00000142611	cg20962938	0.492492	8.52667e-09	0.00347209	0.43923	5.28278e-14	2.15117e-08	overlap
ENSG00000142611	cg20387569	0.473892	3.55372e-08	0.0144709	0.439149	5.44382e-14	2.21674e-08	overlap
ENSG00000142611	cg21681320	0.514556	1.2762e-09	0.000519674	0.497199	0	0	overlap
ENSG00000142611	cg24499605	0.477757	2.66502e-08	0.0108521	0.420406	2.28549e-12	9.30662e-07	overlap
ENSG00000142611	cg24298696	0.515558	1.16003e-09	0.000472369	0.220163	0.000378094	1	fSpecific
ENSG00000142611	cg24878051	0.576141	0	0	0.473065	0	0	overlap
ENSG00000142611	cg24807850	0.536111	9.2998e-11	3.78691e-05	0.384797	2.17712e-10	8.8653e-05	overlap
ENSG00000142611	cg25052274	0.468995	5.08808e-08	0.0207189	0.456256	0	0	overlap
ENSG00000142611	cg24645149	0.612412	0	0	0.526144	0	0	overlap
ENSG00000142611	cg24642064	0.464111	7.2348e-08	0.0294604	0.435362	1.61638e-13	6.58196e-08	overlap
ENSG00000142611	cg24678113	0.486679	1.34849e-08	0.0054911	0.469278	0	0	overlap
ENSG00000142611	cg22862319	0.603244	0	0	0.388453	1.42092e-10	5.78605e-05	overlap
ENSG00000142611	cg23050300	0.590685	0	0	0.503863	0	0	overlap
ENSG00000142611	cg23999080	0.516172	1.0934e-09	0.000445238	0.476858	0	0	overlap
ENSG00000142611	cg26891951	0.564645	0	0	0.50697	0	0	overlap
ENSG00000142611	cg26864297	0.537364	7.26013e-11	2.95636e-05	0.32043	1.67981e-07	0.0684024	fSpecific
ENSG00000142611	cg25411239	0.461217	8.88847e-08	0.0361942	0.430393	4.50082e-13	1.83275e-07	overlap
ENSG00000142611	cg25150520	0.582986	0	0	0.496267	0	0	overlap
ENSG00000142611	cg26222332	0.5007	4.35627e-09	0.00177389	0.389922	1.19485e-10	4.86548e-05	overlap
ENSG00000142611	cg26153353	0.599029	0	0	0.498881	0	0	overlap
ENSG00000142611	cg26014413	0.472774	3.85937e-08	0.0157155	0.319413	1.84467e-07	0.0751155	fSpecific
ENSG00000142611	cg26017484	0.508946	2.13658e-09	0.000870023	0.428083	6.78318e-13	2.76214e-07	overlap
ENSG00000142611	cg26044566	0.524449	4.65089e-10	0.000189386	0.492147	0	0	overlap
ENSG00000130762	cg03916277	0.543429	4.62667e-12	1.884e-06	0.488727	0	0	overlap
ENSG00000130762	cg02737335	0.484461	1.60114e-08	0.00651991	0.430903	4.09369e-13	1.66697e-07	overlap
ENSG00000130762	cg04488647	0.472449	3.95298e-08	0.0160967	0.321037	1.58837e-07	0.0646792	fSpecific
ENSG00000130762	cg11587191	0.615877	0	0	0.580746	0	0	overlap
ENSG00000130762	cg15015996	0.534224	1.28993e-10	5.25264e-05	0.476992	0	0	overlap
ENSG00000130762	cg14039138	0.472528	3.92982e-08	0.0160024	0.42477	1.17149e-12	4.77034e-07	overlap
ENSG00000130762	cg15900221	0.565935	0	0	0.581172	0	0	overlap
ENSG00000130762	cg24919884	0.459521	1.0019e-07	0.0407976	0.522247	0	0	overlap
ENSG00000162591	cg03448635	0.648215	0	0	0.566104	0	0	overlap
ENSG00000162591	cg03457400	0.590943	0	0	0.48639	0	0	overlap
ENSG00000162591	cg03328107	0.467785	5.55485e-08	0.0226196	0.39891	4.03128e-11	1.64155e-05	overlap
ENSG00000162591	cg04439600	0.489462	1.08444e-08	0.00441589	0.445444	0	0	overlap
ENSG00000162591	cg01215682	0.676363	0	0	0.531007	0	0	overlap
ENSG00000162591	cg20451455	0.537911	6.44951e-11	2.62627e-05	0.341536	2.23204e-08	0.00908896	overlap
ENSG00000162591	cg26786407	0.472688	3.88389e-08	0.0158154	0.444973	0	0	overlap
ENSG00000078900	cg03568718	0.51506	1.21655e-09	0.000495386	0.359219	3.66233e-09	0.00149132	overlap
ENSG00000078900	cg03043665	0.49219	8.73431e-09	0.00355665	0.321276	1.55368e-07	0.0632664	fSpecific
ENSG00000078900	cg22234529	0.474728	3.3405e-08	0.0136026	0.454303	0	0	overlap
ENSG00000078900	cg23052055	0.490015	1.03814e-08	0.00422736	0.308424	4.96507e-07	0.202179	fSpecific
ENSG00000131697	cg03225003	0.579613	0	0	0.7115	0	0	overlap
ENSG00000131697	cg02275243	0.571281	0	0	0.678991	0	0	overlap
ENSG00000131697	cg02451888	0.55439	0	0	0.710526	0	0	overlap
ENSG00000131697	cg03026397	0.560166	0	0	0.715186	0	0	overlap
ENSG00000131697	cg02841875	0.519238	8.07725e-10	0.000328909	0.534086	0	0	overlap
ENSG00000131697	cg05927645	0.678298	0	0	0.685268	0	0	overlap
ENSG00000131697	cg05463119	0.560608	0	0	0.637507	0	0	overlap
ENSG00000131697	cg05962033	0.537702	6.75376e-11	2.75016e-05	0.623665	0	0	overlap
ENSG00000131697	cg06156296	0.548989	0	0	0.670174	0	0	overlap
ENSG00000131697	cg06173758	0.460307	9.47861e-08	0.0385973	0.414391	5.39012e-12	2.19488e-06	overlap
ENSG00000131697	cg04557181	0.638876	0	0	0.680715	0	0	overlap
ENSG00000131697	cg04290350	0.701235	0	0	0.746174	0	0	overlap
ENSG00000131697	cg05302064	0.650679	0	0	0.737618	0	0	overlap
ENSG00000131697	cg08609517	0.56765	0	0	0.559894	0	0	overlap
ENSG00000131697	cg08622934	0.636731	0	0	0.641578	0	0	overlap
ENSG00000131697	cg06616755	0.490003	1.03915e-08	0.00423146	0.525511	0	0	overlap
ENSG00000131697	cg06981887	0.591939	0	0	0.712303	0	0	overlap
ENSG00000131697	cg09976670	0.577413	0	0	0.596621	0	0	overlap
ENSG00000131697	cg10100287	0.642765	0	0	0.660399	0	0	overlap
ENSG00000131697	cg10719852	0.614488	0	0	0.679629	0	0	overlap
ENSG00000131697	cg09136597	0.574734	0	0	0.70276	0	0	overlap
ENSG00000131697	cg08882503	0.622488	0	0	0.654806	0	0	overlap
ENSG00000131697	cg08893598	0.64231	0	0	0.692408	0	0	overlap
ENSG00000131697	cg09802610	0.585038	0	0	0.655031	0	0	overlap
ENSG00000131697	cg09275986	0.562863	0	0	0.49934	0	0	overlap
ENSG00000131697	cg09247779	0.534101	1.3158e-10	5.35799e-05	0.507719	0	0	overlap
ENSG00000131697	cg12415902	0.513364	1.42759e-09	0.000581322	0.478106	0	0	overlap
ENSG00000131697	cg12438598	0.598624	0	0	0.61731	0	0	overlap
ENSG00000131697	cg11725182	0.506482	2.65625e-09	0.00108163	0.629038	0	0	overlap
ENSG00000131697	cg14559147	0.539238	4.66509e-11	1.89964e-05	0.648795	0	0	overlap
ENSG00000131697	cg15466571	0.623054	0	0	0.725759	0	0	overlap
ENSG00000131697	cg15550953	0.482507	1.86014e-08	0.00757457	0.564484	0	0	overlap
ENSG00000131697	cg15324288	0.575244	0	0	0.727735	0	0	overlap
ENSG00000131697	cg13226145	0.559158	0	0	0.601547	0	0	overlap
ENSG00000131697	cg13396716	0.634194	0	0	0.742071	0	0	overlap
ENSG00000131697	cg14071324	0.544725	0	0	0.60608	0	0	overlap
ENSG00000131697	cg14260998	0.660829	0	0	0.703903	0	0	overlap
ENSG00000131697	cg13857472	0.661616	0	0	0.741349	0	0	overlap
ENSG00000131697	cg17138037	0.550747	0	0	0.583814	0	0	overlap
ENSG00000131697	cg17213616	0.519988	7.48456e-10	0.000304774	0.569322	0	0	overlap
ENSG00000131697	cg17490283	0.563859	0	0	0.49251	0	0	overlap
ENSG00000131697	cg17269424	0.633659	0	0	0.72874	0	0	overlap
ENSG00000131697	cg15728744	0.562065	0	0	0.605938	0	0	overlap
ENSG00000131697	cg16277741	0.644952	0	0	0.701158	0	0	overlap
ENSG00000131697	cg16164843	0.619195	0	0	0.692547	0	0	overlap
ENSG00000131697	cg16148365	0.663908	0	0	0.766905	0	0	overlap
ENSG00000131697	cg16176837	0.563951	0	0	0.572342	0	0	overlap
ENSG00000131697	cg20277740	0.544571	0	0	0.687549	0	0	overlap
ENSG00000131697	cg19804525	0.590009	0	0	0.685489	0	0	overlap
ENSG00000131697	cg00702417	0.545573	0	0	0.610851	0	0	overlap
ENSG00000131697	cg00011717	0.513346	1.43005e-09	0.000582324	0.494302	0	0	overlap
ENSG00000131697	cg00258499	0.577327	0	0	0.687965	0	0	overlap
ENSG00000131697	cg01083589	0.505647	2.85691e-09	0.00116334	0.605206	0	0	overlap
ENSG00000131697	cg22129135	0.589745	0	0	0.691907	0	0	overlap
ENSG00000131697	cg22682724	0.556233	0	0	0.632415	0	0	overlap
ENSG00000131697	cg22399023	0.584965	0	0	0.688062	0	0	overlap
ENSG00000131697	cg22506757	0.654323	0	0	0.614477	0	0	overlap
ENSG00000131697	cg22530668	0.642316	0	0	0.637657	0	0	overlap
ENSG00000131697	cg20810082	0.588971	0	0	0.671276	0	0	overlap
ENSG00000131697	cg20806172	0.640301	0	0	0.66542	0	0	overlap
ENSG00000131697	cg20825872	0.619293	0	0	0.616363	0	0	overlap
ENSG00000131697	cg20828333	0.616068	0	0	0.653941	0	0	overlap
ENSG00000131697	cg20414505	0.50435	3.19564e-09	0.00130128	0.50566	0	0	overlap
ENSG00000131697	cg21451253	0.582949	0	0	0.664745	0	0	overlap
ENSG00000131697	cg21470600	0.612602	0	0	0.680657	0	0	overlap
ENSG00000131697	cg21010995	0.654882	0	0	0.653853	0	0	overlap
ENSG00000131697	cg24864189	0.63506	0	0	0.665646	0	0	overlap
ENSG00000131697	cg24883265	0.511644	1.67393e-09	0.000681632	0.56132	0	0	overlap
ENSG00000131697	cg25035489	0.590808	0	0	0.501703	0	0	overlap
ENSG00000131697	cg24927323	0.63082	0	0	0.636338	0	0	overlap
ENSG00000131697	cg24693635	0.590144	0	0	0.642039	0	0	overlap
ENSG00000131697	cg23589237	0.624854	0	0	0.638275	0	0	overlap
ENSG00000131697	cg26661089	0.64679	0	0	0.48343	0	0	overlap
ENSG00000131697	cg27233192	0.692473	0	0	0.740767	0	0	overlap
ENSG00000131697	cg25320798	0.493905	7.61228e-09	0.00309975	0.515613	0	0	overlap
ENSG00000131697	cg26269846	0.639177	0	0	0.675658	0	0	overlap
ENSG00000069424	cg02448796	0.481806	1.96228e-08	0.00799049	0.473655	0	0	overlap
ENSG00000069424	cg02630629	0.555232	0	0	0.559224	0	0	overlap
ENSG00000069424	cg05372828	0.459736	9.86837e-08	0.0401844	0.543332	0	0	overlap
ENSG00000069424	cg06118571	0.526415	3.71413e-10	0.000151241	0.560945	0	0	overlap
ENSG00000069424	cg07922513	0.475336	3.19299e-08	0.013002	0.458381	0	0	overlap
ENSG00000069424	cg13243674	0.602212	0	0	0.602893	0	0	overlap
ENSG00000069424	cg17179571	0.493628	7.78363e-09	0.00316953	0.571974	0	0	overlap
ENSG00000069424	cg17499212	0.53165	1.90214e-10	7.74557e-05	0.516016	0	0	overlap
ENSG00000069424	cg15731035	-0.479988	2.25287e-08	0.00917376	-0.28068	5.11733e-06	1	fSpecific
ENSG00000069424	cg19902591	0.646335	0	0	0.596382	0	0	overlap
ENSG00000069424	cg00773460	0.539982	3.77046e-11	1.53534e-05	0.490301	0	0	overlap
ENSG00000069424	cg00055881	0.534058	1.32493e-10	5.39516e-05	0.571947	0	0	overlap
ENSG00000069424	cg00043790	0.466912	5.91631e-08	0.0240914	0.523479	0	0	overlap
ENSG00000069424	cg00352913	-0.526667	3.6056e-10	0.000146821	-0.301382	9.17938e-07	0.373788	fSpecific
ENSG00000069424	cg01907457	0.545567	0	0	0.586595	0	0	overlap
ENSG00000069424	cg01014986	0.482022	1.93037e-08	0.00786055	0.584542	0	0	overlap
ENSG00000069424	cg22810710	0.639594	0	0	0.640256	0	0	overlap
ENSG00000069424	cg20415848	0.479558	2.32732e-08	0.00947692	0.561129	0	0	overlap
ENSG00000069424	cg24545495	0.563625	0	0	0.610371	0	0	overlap
ENSG00000069424	cg24585000	0.51777	9.35371e-10	0.000380887	0.432724	2.87191e-13	1.16945e-07	overlap
ENSG00000069424	cg25880365	0.523883	4.95192e-10	0.000201644	0.541177	0	0	overlap
ENSG00000158292	cg17742359	0.563613	0	0	0.391167	1.03069e-10	4.19702e-05	overlap
ENSG00000215788	cg04500986	-0.500565	4.40589e-09	0.0017941	-0.367261	1.55071e-09	0.000631455	overlap
ENSG00000162426	cg00341060	-0.469419	4.93362e-08	0.0200899	-0.160525	0.00986802	1	fSpecific
ENSG00000074800	cg06972019	-0.471097	4.36514e-08	0.017775	-0.258536	2.79015e-05	1	fSpecific
ENSG00000142583	cg03679305	-0.563041	0	0	-0.608332	0	0	overlap
ENSG00000142583	cg12763828	-0.601002	0	0	-0.630241	0	0	overlap
ENSG00000142583	cg00310940	-0.658673	0	0	-0.627184	0	0	overlap
ENSG00000171621	cg06899522	-0.466206	6.22535e-08	0.0253499	-0.436663	1.16841e-13	4.75782e-08	overlap
ENSG00000009724	cg12888113	-0.554888	0	0	-0.534914	0	0	overlap
ENSG00000009724	cg20986726	-0.463281	7.67606e-08	0.0312572	-0.447313	0	0	overlap
ENSG00000116661	cg05796704	-0.541899	1.77335e-11	7.22113e-06	-0.501272	0	0	overlap
ENSG00000116661	cg01420388	-0.540873	2.78943e-11	1.13587e-05	-0.506752	0	0	overlap
ENSG00000116661	cg22697136	-0.501469	4.08394e-09	0.00166299	-0.443686	0	0	overlap
ENSG00000189337	cg04487600	0.470937	4.41647e-08	0.0179841	0.242543	8.69456e-05	1	fSpecific
ENSG00000189337	cg05046721	0.544473	0	0	0.187955	0.00246998	1	fSpecific
ENSG00000189337	cg06887407	0.535404	1.05693e-10	4.30388e-05	0.204345	0.000983821	1	fSpecific
ENSG00000189337	cg12485744	0.561413	0	0	0.271327	1.0661e-05	1	fSpecific
ENSG00000189337	cg14041921	0.490366	1.00979e-08	0.00411189	0.182072	0.00337883	1	fSpecific
ENSG00000189337	cg16985952	0.512854	1.49704e-09	0.0006096	0.210886	0.000667897	1	fSpecific
ENSG00000189337	cg16822407	0.62306	0	0	0.385125	2.09599e-10	8.53494e-05	overlap
ENSG00000189337	cg15733729	0.588012	0	0	0.21583	0.00049463	1	fSpecific
ENSG00000189337	cg19260606	0.49157	9.17735e-09	0.00373705	0.348493	1.1106e-08	0.00452241	overlap
ENSG00000189337	cg20299399	0.543281	5.7909e-12	2.35808e-06	0.234173	0.000153126	1	fSpecific
ENSG00000189337	cg01567509	0.656528	0	0	0.355846	5.21385e-09	0.0021231	overlap
ENSG00000189337	cg27538859	0.45874	1.05841e-07	0.0430988	0.187684	0.00250639	1	fSpecific
ENSG00000162460	cg00601916	-0.685198	0	0	-0.662375	0	0	overlap
ENSG00000162460	cg01802898	-0.642132	0	0	-0.599251	0	0	overlap
ENSG00000162460	cg00984214	-0.617542	0	0	-0.637663	0	0	overlap
ENSG00000173641	cg21214613	-0.457843	1.12713e-07	0.0458972	-0.421685	1.88813e-12	7.68856e-07	overlap
ENSG00000142627	cg05797770	-0.485555	1.47145e-08	0.00599179	-0.391728	9.64107e-11	3.92588e-05	overlap
ENSG00000142632	cg02455792	0.495257	6.82412e-09	0.00277881	0.373952	7.44381e-10	0.000303115	overlap
ENSG00000142623	cg05800639	0.541284	2.36771e-11	9.64141e-06	0.399261	3.8597e-11	1.57168e-05	overlap
ENSG00000142623	cg14524955	0.470212	4.65673e-08	0.0189624	0.368053	1.42303e-09	0.000579464	overlap
ENSG00000142623	cg19414383	0.493518	7.85317e-09	0.00319784	0.35001	9.51608e-09	0.00387499	overlap
ENSG00000142623	cg22193702	0.483502	1.72361e-08	0.00701862	0.283052	4.23076e-06	1	fSpecific
ENSG00000179023	cg24076588	-0.457653	1.14226e-07	0.0465133	-0.369711	1.18773e-09	0.000483646	overlap
ENSG00000169991	cg10203842	-0.461512	8.70473e-08	0.035446	-0.309892	4.35977e-07	0.177532	fSpecific
ENSG00000162482	cg07447773	-0.539502	4.33892e-11	1.76683e-05	-0.31625	2.4627e-07	0.100282	fSpecific
ENSG00000162482	cg07037032	-0.621309	0	0	-0.425751	1.00066e-12	4.07474e-07	overlap
ENSG00000162482	cg17431922	-0.505573	2.87526e-09	0.00117082	-0.374329	7.13817e-10	0.000290669	overlap
ENSG00000178828	cg09195271	-0.496885	5.97583e-09	0.00243338	-0.503155	0	0	overlap
ENSG00000162543	cg01455981	-0.493579	7.81447e-09	0.00318208	-0.480886	0	0	overlap
ENSG00000158825	cg04087271	-0.458316	1.09037e-07	0.0444004	-0.555601	0	0	overlap
ENSG00000158825	cg06984156	-0.636541	0	0	-0.613725	0	0	overlap
ENSG00000158825	cg17900103	-0.508928	2.1401e-09	0.000871456	-0.481075	0	0	overlap
ENSG00000076864	cg03132729	-0.584639	0	0	-0.508158	0	0	overlap
ENSG00000142798	cg00359395	-0.517806	9.31969e-10	0.000379501	-0.352299	7.52699e-09	0.00306502	overlap
ENSG00000142798	cg25138553	-0.521124	6.65537e-10	0.000271009	-0.250468	4.99597e-05	1	fSpecific
ENSG00000162552	cg03519931	0.580897	0	0	0.442863	9.6111e-16	3.91368e-10	overlap
ENSG00000133216	cg04099056	0.521057	6.70244e-10	0.000272926	0.683542	0	0	overlap
ENSG00000133216	cg11248999	0.550138	0	0	0.665441	0	0	overlap
ENSG00000133216	cg23232832	0.541167	2.48535e-11	1.01204e-05	0.622521	0	0	overlap
ENSG00000125945	cg16696234	-0.522704	5.63054e-10	0.000229278	-0.16959	0.00637745	1	fSpecific
ENSG00000185436	cg16117757	-0.498704	5.14472e-09	0.00209495	-0.504737	0	0	overlap
ENSG00000158055	cg06376426	-0.498593	5.19202e-09	0.00211421	-0.544195	0	0	overlap
ENSG00000158055	cg21273275	-0.53863	5.45195e-11	2.22005e-05	-0.455241	0	0	overlap
ENSG00000117643	cg22724943	-0.475791	3.0868e-08	0.0125696	-0.275899	7.4712e-06	1	fSpecific
ENSG00000142675	cg09890400	-0.650912	0	0	-0.63893	0	0	overlap
ENSG00000142675	cg10096100	-0.645032	0	0	-0.636813	0	0	overlap
ENSG00000142675	cg15622158	-0.629524	0	0	-0.538408	0	0	overlap
ENSG00000142675	cg13553204	-0.574771	0	0	-0.534348	0	0	overlap
ENSG00000142675	cg00147160	-0.543379	5.0125e-12	2.04111e-06	-0.484864	0	0	overlap
ENSG00000142675	cg00300879	-0.630949	0	0	-0.636759	0	0	overlap
ENSG00000142675	cg23602478	-0.621284	0	0	-0.620062	0	0	overlap
ENSG00000142675	cg26412358	-0.603115	0	0	-0.580252	0	0	overlap
ENSG00000117676	cg08034986	-0.48988	1.04929e-08	0.00427273	-0.254896	3.63733e-05	1	fSpecific
ENSG00000117676	cg13092108	-0.658943	0	0	-0.515939	0	0	overlap
ENSG00000117676	cg24585377	-0.630065	0	0	-0.5106	0	0	overlap
ENSG00000204160	cg06511276	-0.465167	6.70757e-08	0.0273135	-0.321288	1.55197e-07	0.0631969	fSpecific
ENSG00000175793	cg03421300	-0.694624	0	0	-0.660207	0	0	overlap
ENSG00000175793	cg07786675	-0.733094	0	0	-0.729355	0	0	overlap
ENSG00000175793	cg06720467	-0.744719	0	0	-0.667765	0	0	overlap
ENSG00000175793	cg12583970	-0.665475	0	0	-0.639773	0	0	overlap
ENSG00000175793	cg11348165	-0.729192	0	0	-0.703103	0	0	overlap
ENSG00000175793	cg14825555	-0.70032	0	0	-0.681672	0	0	overlap
ENSG00000175793	cg14333454	-0.625315	0	0	-0.606199	0	0	overlap
ENSG00000175793	cg13466284	-0.771435	0	0	-0.781459	0	0	overlap
ENSG00000175793	cg13374701	-0.738458	0	0	-0.702732	0	0	overlap
ENSG00000175793	cg17330303	-0.779902	0	0	-0.778716	0	0	overlap
ENSG00000175793	cg21950166	-0.754286	0	0	-0.705395	0	0	overlap
ENSG00000131910	cg15966151	-0.525763	4.00639e-10	0.000163142	-0.524721	0	0	overlap
ENSG00000175707	cg21921474	-0.514206	1.31915e-09	0.000537163	-0.407462	1.36315e-11	5.55081e-06	overlap
ENSG00000142765	cg04608356	-0.473278	3.71869e-08	0.0151426	-0.334123	4.61155e-08	0.0187784	overlap
ENSG00000126705	cg06381964	-0.552713	0	0	-0.404126	2.09504e-11	8.53108e-06	overlap
ENSG00000126705	cg14510299	-0.502697	3.6806e-09	0.00149876	-0.31143	3.80164e-07	0.154804	fSpecific
ENSG00000159023	cg11690983	-0.492676	8.40183e-09	0.00342126	-0.363348	2.36285e-09	0.00096216	overlap
ENSG00000253304	cg07556059	-0.642249	0	0	-0.598078	0	0	overlap
ENSG00000253304	cg08467760	-0.527945	3.09161e-10	0.000125891	-0.376997	5.29842e-10	0.000215754	overlap
ENSG00000253304	cg10165585	-0.551336	0	0	-0.501802	0	0	overlap
ENSG00000253304	cg00866556	-0.551379	0	0	-0.553987	0	0	overlap
ENSG00000253304	cg22698996	-0.514759	1.2519e-09	0.000509777	-0.508873	0	0	overlap
ENSG00000060656	cg14030258	0.464657	6.95725e-08	0.0283302	0.14732	0.0179677	1	fSpecific
ENSG00000060656	cg21787390	0.651957	0	0	0.447652	0	0	overlap
ENSG00000142910	cg03314569	-0.551711	0	0	-0.404505	1.99603e-11	8.12793e-06	overlap
ENSG00000142910	cg10823804	-0.514728	1.25555e-09	0.000511266	-0.547737	0	0	overlap
ENSG00000142910	cg14869028	-0.470433	4.58215e-08	0.0186587	-0.310705	4.05547e-07	0.16514	fSpecific
ENSG00000142910	cg15120085	-0.586316	0	0	-0.414637	5.20953e-12	2.12134e-06	overlap
ENSG00000142910	cg15079885	-0.518341	8.83806e-10	0.00035989	-0.388736	1.37438e-10	5.59654e-05	overlap
ENSG00000142910	cg00541683	-0.474175	3.48019e-08	0.0141715	-0.337472	3.33025e-08	0.0135609	overlap
ENSG00000142910	cg24873592	-0.481849	1.95586e-08	0.00796434	-0.346579	1.34796e-08	0.00548895	overlap
ENSG00000142910	cg22855405	-0.463066	7.79458e-08	0.0317398	-0.350195	9.33854e-09	0.00380269	overlap
ENSG00000182866	cg11683242	-0.493333	7.97037e-09	0.00324557	-0.351337	8.30878e-09	0.00338337	overlap
ENSG00000121904	cg08861449	0.570618	0	0	0.416839	3.82849e-12	1.55898e-06	overlap
ENSG00000121904	cg00171942	0.543588	3.38808e-12	1.37964e-06	0.310458	4.14553e-07	0.168808	fSpecific
ENSG00000121904	cg01443433	0.593493	0	0	0.527796	0	0	overlap
ENSG00000116885	cg08878450	-0.486052	1.41577e-08	0.00576508	-0.416351	4.10138e-12	1.6701e-06	overlap
ENSG00000163879	cg02930200	-0.497598	5.6363e-09	0.00229512	-0.421779	1.86164e-12	7.58069e-07	overlap
ENSG00000163879	cg14830003	-0.79804	0	0	-0.651473	0	0	overlap
ENSG00000163879	cg16109423	-0.509837	1.9725e-09	0.00080321	-0.445141	0	0	overlap
ENSG00000163879	cg20772512	-0.47796	2.62478e-08	0.0106882	-0.350416	9.12957e-09	0.0037176	overlap
ENSG00000163879	cg21488617	-0.676522	0	0	-0.588187	0	0	overlap
ENSG00000163879	cg21171625	-0.749671	0	0	-0.624781	0	0	overlap
ENSG00000183317	cg04622024	0.566851	0	0	0.331504	5.9332e-08	0.0241602	overlap
ENSG00000183317	cg11664987	0.532141	1.77322e-10	7.22062e-05	0.314476	2.89194e-07	0.117761	fSpecific
ENSG00000185090	cg00664416	0.626224	0	0	0.621379	0	0	overlap
ENSG00000185090	cg24433287	0.631355	0	0	0.597587	0	0	overlap
ENSG00000116985	cg15728256	-0.506802	2.58297e-09	0.00105179	-0.375046	6.59053e-10	0.000268369	overlap
ENSG00000168389	cg19694978	-0.511533	1.69098e-09	0.000688575	-0.305448	6.4496e-07	0.26263	fSpecific
ENSG00000179862	cg04011995	-0.565407	0	0	-0.54526	0	0	overlap
ENSG00000127124	cg09664054	0.589352	0	0	0.599081	0	0	overlap
ENSG00000127124	cg12614395	0.496338	6.24911e-09	0.00254466	0.546659	0	0	overlap
ENSG00000127124	cg11256186	0.525002	4.37062e-10	0.000177973	0.563237	0	0	overlap
ENSG00000127124	cg11219637	0.632971	0	0	0.545149	0	0	overlap
ENSG00000127124	cg14663208	0.513118	1.4607e-09	0.000594803	0.61306	0	0	overlap
ENSG00000127124	cg16096631	0.522863	5.53449e-10	0.000225367	0.501305	0	0	overlap
ENSG00000127124	cg16432235	0.467134	5.82261e-08	0.0237099	0.370187	1.12746e-09	0.000459107	overlap
ENSG00000127124	cg22794214	0.463459	7.57916e-08	0.0308626	0.529302	0	0	overlap
ENSG00000127124	cg22366951	0.584	0	0	0.564806	0	0	overlap
ENSG00000127124	cg25191304	0.609346	0	0	0.617245	0	0	overlap
ENSG00000127124	cg25202370	0.501112	4.20828e-09	0.00171363	0.530229	0	0	overlap
ENSG00000197273	cg13452215	-0.483791	1.68581e-08	0.00686469	-0.550465	0	0	overlap
ENSG00000066185	cg06346081	-0.49898	5.02819e-09	0.0020475	-0.425567	1.0309e-12	4.19786e-07	overlap
ENSG00000066185	cg06520846	-0.48322	1.76138e-08	0.00717243	-0.449377	0	0	overlap
ENSG00000253313	cg09988116	-0.688713	0	0	-0.562778	0	0	overlap
ENSG00000253313	cg12752420	-0.504012	3.28976e-09	0.0013396	-0.526555	0	0	overlap
ENSG00000253313	cg01413566	-0.652117	0	0	-0.530073	0	0	overlap
ENSG00000066056	cg11582369	0.460756	9.18301e-08	0.0373936	0.349134	1.0405e-08	0.00423694	overlap
ENSG00000066056	cg13470063	-0.483779	1.6874e-08	0.00687118	-0.243387	8.20322e-05	1	fSpecific
ENSG00000066056	cg21539594	-0.520891	6.81914e-10	0.000277678	-0.237156	0.000125441	1	fSpecific
ENSG00000171357	cg15696662	0.492793	8.32366e-09	0.00338943	0.535295	0	0	overlap
ENSG00000186377	cg00255821	0.468928	5.11313e-08	0.0208209	0.192618	0.00191459	1	fSpecific
ENSG00000162366	cg02291556	-0.667349	0	0	-0.738099	0	0	overlap
ENSG00000162366	cg02991727	-0.48526	1.50541e-08	0.00613008	-0.528413	0	0	overlap
ENSG00000162366	cg07150145	-0.707859	0	0	-0.778037	0	0	overlap
ENSG00000162366	cg09258479	-0.647023	0	0	-0.690989	0	0	overlap
ENSG00000186564	cg02267408	0.524246	4.75714e-10	0.000193713	0.421255	2.01411e-12	8.20153e-07	overlap
ENSG00000186564	cg06531379	0.703281	0	0	0.516363	0	0	overlap
ENSG00000186564	cg08260398	0.763121	0	0	0.656214	0	0	overlap
ENSG00000186564	cg16342298	-0.523803	4.99569e-10	0.000203426	-0.594114	0	0	overlap
ENSG00000186564	cg21535606	0.747164	0	0	0.441725	1.34659e-14	5.48337e-09	overlap
ENSG00000186564	cg26864230	0.555674	0	0	0.598863	0	0	overlap
ENSG00000269113	cg04084173	0.526421	3.71145e-10	0.000151132	0.511862	0	0	overlap
ENSG00000269113	cg15001714	0.507453	2.43923e-09	0.000993264	0.48951	0	0	overlap
ENSG00000269113	cg25099516	0.52698	3.474e-10	0.000141463	0.61351	0	0	overlap
ENSG00000117834	cg25469314	0.476399	2.94998e-08	0.0120124	0.418094	3.20129e-12	1.30358e-06	overlap
ENSG00000132122	cg24862246	0.531367	1.97904e-10	8.05874e-05	0.669441	0	0	overlap
ENSG00000085831	cg12620005	-0.456897	1.20423e-07	0.0490365	-0.437305	9.8075e-14	3.99365e-08	overlap
ENSG00000117859	cg26055812	-0.656891	0	0	-0.592086	0	0	overlap
ENSG00000169213	cg11585605	0.465788	6.41527e-08	0.0261232	0.630084	0	0	overlap
ENSG00000169213	cg17140222	0.490108	1.03061e-08	0.00419668	0.72752	0	0	overlap
ENSG00000116157	cg02453146	-0.623447	0	0	-0.610759	0	0	overlap
ENSG00000116157	cg11953272	-0.622697	0	0	-0.714896	0	0	overlap
ENSG00000116157	cg16557944	-0.516657	1.04313e-09	0.000424766	-0.498136	0	0	overlap
ENSG00000116157	cg22129364	-0.470323	4.6193e-08	0.01881	-0.500082	0	0	overlap
ENSG00000116157	cg20950465	-0.52776	3.1621e-10	0.000128762	-0.520262	0	0	overlap
ENSG00000116157	cg23272399	-0.610575	0	0	-0.641046	0	0	overlap
ENSG00000116157	cg26251270	-0.693253	0	0	-0.779461	0	0	overlap
ENSG00000203995	cg09167911	-0.496332	6.25225e-09	0.00254594	-0.365956	1.78576e-09	0.00072717	overlap
ENSG00000203995	cg08736216	-0.665137	0	0	-0.433053	2.68531e-13	1.09347e-07	overlap
ENSG00000162383	cg01132471	-0.532141	1.77322e-10	7.22062e-05	-0.358961	3.76314e-09	0.00153237	overlap
ENSG00000162383	cg20741386	-0.629241	0	0	-0.402037	2.72926e-11	1.11136e-05	overlap
ENSG00000162383	cg25381331	-0.591521	0	0	-0.368689	1.32791e-09	0.000540728	overlap
ENSG00000211452	cg03886898	-0.497757	5.5627e-09	0.00226515	-0.335334	4.10118e-08	0.0167002	overlap
ENSG00000211452	cg23036171	-0.4913	9.37687e-09	0.0038183	-0.288914	2.62445e-06	1	fSpecific
ENSG00000162391	cg12179353	-0.487889	1.22698e-08	0.00499631	-0.405728	1.70647e-11	6.94883e-06	overlap
ENSG00000006555	cg17457014	0.457825	1.12859e-07	0.0459565	0.408393	1.20686e-11	4.9144e-06	overlap
ENSG00000162409	cg16021159	0.517708	9.41065e-10	0.000383205	0.471763	0	0	overlap
ENSG00000187889	cg05866021	-0.49898	5.02819e-09	0.0020475	-0.532348	0	0	overlap
ENSG00000173406	cg02760152	0.555785	0	0	0.5072	0	0	overlap
ENSG00000173406	cg04362706	0.522962	5.47604e-10	0.000222987	0.483677	0	0	overlap
ENSG00000173406	cg15131883	0.464959	6.8088e-08	0.0277257	0.395285	6.2839e-11	2.55883e-05	overlap
ENSG00000173406	cg01074356	0.497954	5.47334e-09	0.00222876	0.357441	4.41413e-09	0.00179745	overlap
ENSG00000173406	cg23691223	0.492154	8.76006e-09	0.00356713	0.465638	0	0	overlap
ENSG00000172456	cg16398581	-0.496817	6.00899e-09	0.00244689	-0.432248	3.15911e-13	1.2864e-07	overlap
ENSG00000132854	cg06978514	0.509702	1.99664e-09	0.000813041	0.489036	0	0	overlap
ENSG00000132854	cg09353705	0.5291	2.67596e-10	0.000108966	0.59412	0	0	overlap
ENSG00000132854	cg15835664	0.525776	4.00071e-10	0.000162911	0.533816	0	0	overlap
ENSG00000132854	cg16174164	0.550341	0	0	0.477651	0	0	overlap
ENSG00000185483	cg05819223	0.510673	1.82895e-09	0.000744757	0.544288	0	0	overlap
ENSG00000185483	cg10977280	0.494439	7.29096e-09	0.00296891	0.413161	6.38069e-12	2.59824e-06	overlap
ENSG00000185483	cg09323350	0.475158	3.23555e-08	0.0131753	0.518974	0	0	overlap
ENSG00000185483	cg11724942	0.463668	7.46704e-08	0.0304061	0.401504	2.91858e-11	1.18846e-05	overlap
ENSG00000185483	cg14216252	0.479619	2.31654e-08	0.00943304	0.453702	0	0	overlap
ENSG00000185483	cg22696652	0.470273	4.6359e-08	0.0188776	0.515066	0	0	overlap
ENSG00000185483	cg24052817	0.599115	0	0	0.565527	0	0	overlap
ENSG00000185483	cg27510001	0.492178	8.74289e-09	0.00356014	0.473472	0	0	overlap
ENSG00000158966	cg12049550	0.524264	4.7474e-10	0.000193316	0.513693	0	0	overlap
ENSG00000158966	cg11795488	0.490783	9.76912e-09	0.00397802	0.587603	0	0	overlap
ENSG00000158966	cg00825690	0.540608	3.07041e-11	1.25028e-05	0.510081	0	0	overlap
ENSG00000158966	cg21679730	0.493389	7.93504e-09	0.00323118	0.553837	0	0	overlap
ENSG00000158966	cg23260625	0.578298	0	0	0.544455	0	0	overlap
ENSG00000158966	cg25210796	0.472608	3.90679e-08	0.0159086	0.572286	0	0	overlap
ENSG00000162437	cg10378032	0.490949	9.64139e-09	0.00392601	0.449797	0	0	overlap
ENSG00000162433	cg24049468	-0.574132	0	0	-0.44689	0	0	overlap
ENSG00000118473	cg02994349	-0.50228	3.81343e-09	0.00155284	-0.27339	9.08797e-06	1	fSpecific
ENSG00000118473	cg19406367	-0.546949	0	0	-0.312646	3.40964e-07	0.138842	fSpecific
ENSG00000152760	cg19159365	-0.553573	0	0	-0.455918	0	0	overlap
ENSG00000172380	cg05765440	0.481198	2.05527e-08	0.00836914	0.290839	2.23832e-06	0.911454	fSpecific
ENSG00000116729	cg13186599	0.497131	5.85666e-09	0.00238486	0.577127	0	0	overlap
ENSG00000116729	cg20062893	0.514402	1.29488e-09	0.000527282	0.654232	0	0	overlap
ENSG00000116729	cg22850128	0.543908	9.80271e-13	3.9917e-07	0.539629	0	0	overlap
ENSG00000137968	cg04972669	0.49243	8.56867e-09	0.0034892	0.555854	0	0	overlap
ENSG00000137960	cg26263401	-0.475619	3.12658e-08	0.0127316	-0.477777	0	0	overlap
ENSG00000122420	cg16584604	0.542575	1.16568e-11	4.7467e-06	0.414317	5.44547e-12	2.21742e-06	overlap
ENSG00000117114	cg14044464	0.463318	7.65591e-08	0.0311752	0.376815	5.4076e-10	0.000220199	overlap
ENSG00000117114	cg17506178	0.483084	1.77972e-08	0.00724711	0.417971	3.25862e-12	1.32692e-06	overlap
ENSG00000203943	cg12743388	0.477339	2.74979e-08	0.0111973	0.473289	0	0	overlap
ENSG00000203943	cg15089272	0.528621	2.84306e-10	0.000115771	0.475999	0	0	overlap
ENSG00000203943	cg22343327	0.516811	1.02764e-09	0.000418459	0.333642	4.83103e-08	0.0196721	overlap
ENSG00000203943	cg22529952	0.550488	0	0	0.492247	0	0	overlap
ENSG00000203943	cg23694882	0.46086	9.11544e-08	0.0371184	0.375424	6.31884e-10	0.000257306	overlap
ENSG00000122417	cg01906994	0.6018	0	0	0.355637	5.32887e-09	0.00216994	overlap
ENSG00000117528	cg11237362	-0.513229	1.44572e-09	0.000588703	-0.338208	3.0988e-08	0.0126184	overlap
ENSG00000143036	cg06033721	0.469573	4.87876e-08	0.0198665	0.461629	0	0	overlap
ENSG00000143036	cg20059151	-0.490353	1.01077e-08	0.0041159	-0.54268	0	0	overlap
ENSG00000152078	cg21932672	-0.496664	6.085e-09	0.00247784	-0.434706	1.88121e-13	7.66038e-08	overlap
ENSG00000181656	cg13876809	-0.489905	1.04725e-08	0.00426445	-0.540681	0	0	overlap
ENSG00000162692	cg04743650	-0.483736	1.69299e-08	0.00689392	-0.43768	8.80419e-14	3.5851e-08	overlap
ENSG00000162692	cg25762679	-0.573634	0	0	-0.537865	0	0	overlap
ENSG00000240038	cg11391462	0.501469	4.08394e-09	0.00166299	0.375953	5.95566e-10	0.000242517	overlap
ENSG00000198890	cg22528358	0.496922	5.95781e-09	0.00242604	0.535424	0	0	overlap
ENSG00000198890	cg24693881	0.528301	2.95864e-10	0.000120477	0.643153	0	0	overlap
ENSG00000134215	cg17299412	0.459447	1.00711e-07	0.04101	0.369288	1.24396e-09	0.000506546	overlap
ENSG00000085491	cg00999623	-0.501573	4.04813e-09	0.00164842	-0.240329	0.000101178	1	fSpecific
ENSG00000085491	cg00971228	0.637536	0	0	0.496218	0	0	overlap
ENSG00000162639	cg08460435	-0.560621	0	0	-0.52238	0	0	overlap
ENSG00000143126	cg07152001	0.50628	2.70372e-09	0.00110097	0.34513	1.55958e-08	0.00635067	overlap
ENSG00000143126	cg15625104	0.528952	2.72659e-10	0.000111028	0.361983	2.73316e-09	0.00111295	overlap
ENSG00000134243	cg13912858	-0.619797	0	0	-0.624904	0	0	overlap
ENSG00000134243	cg18974926	-0.461358	8.79997e-08	0.0358338	-0.528721	0	0	overlap
ENSG00000143028	cg02415029	0.471515	4.23357e-08	0.0172393	0.518552	0	0	overlap
ENSG00000143028	cg10127483	-0.51498	1.22584e-09	0.000499169	-0.520063	0	0	overlap
ENSG00000143028	cg08911820	0.547963	0	0	0.436351	1.26707e-13	5.15957e-08	overlap
ENSG00000143028	cg16275483	0.607386	0	0	0.566394	0	0	overlap
ENSG00000143028	cg21079113	-0.479865	2.2739e-08	0.00925943	-0.295537	1.51099e-06	0.615283	fSpecific
ENSG00000143028	cg23091122	0.619631	0	0	0.712611	0	0	overlap
ENSG00000143028	cg26547576	0.471171	4.34164e-08	0.0176794	0.321412	1.53422e-07	0.0624742	fSpecific
ENSG00000134202	cg20971342	0.552485	0	0	0.603248	0	0	overlap
ENSG00000168679	cg09494546	-0.679343	0	0	-0.515569	0	0	overlap
ENSG00000168679	cg00961640	-0.620203	0	0	-0.677093	0	0	overlap
ENSG00000168679	cg25320780	-0.555244	0	0	-0.569377	0	0	overlap
ENSG00000162777	cg08663890	-0.615472	0	0	-0.630584	0	0	overlap
ENSG00000085465	cg09558502	0.485161	1.51689e-08	0.00617684	0.310846	4.00478e-07	0.163076	fSpecific
ENSG00000171385	cg03525385	0.630175	0	0	0.552588	0	0	overlap
ENSG00000171385	cg04843968	0.552633	0	0	0.647837	0	0	overlap
ENSG00000171385	cg07037116	0.487644	1.25079e-08	0.00509325	0.507369	0	0	overlap
ENSG00000171385	cg10039567	0.590402	0	0	0.574383	0	0	overlap
ENSG00000171385	cg17898124	0.668522	0	0	0.67887	0	0	overlap
ENSG00000171385	cg22012659	0.59079	0	0	0.587041	0	0	overlap
ENSG00000171385	cg22040158	0.59192	0	0	0.631842	0	0	overlap
ENSG00000171385	cg20432350	0.479515	2.33489e-08	0.00950775	0.483615	0	0	overlap
ENSG00000171385	cg27314324	0.514734	1.25482e-09	0.000510968	0.54972	0	0	overlap
ENSG00000143061	cg05156532	0.487287	1.28607e-08	0.00523695	0.165894	0.00763887	1	fSpecific
ENSG00000143061	cg19321304	0.485419	1.48692e-08	0.0060548	0.406278	1.58947e-11	6.47239e-06	overlap
ENSG00000134247	cg02283766	0.501978	3.91186e-09	0.00159293	0.347962	1.17199e-08	0.00477238	overlap
ENSG00000134247	cg13100218	0.466771	5.97692e-08	0.0243383	0.349001	1.05465e-08	0.00429456	overlap
ENSG00000116882	cg03762535	-0.495515	6.68259e-09	0.00272118	-0.398182	4.40987e-11	1.79571e-05	overlap
ENSG00000092621	cg06763568	-0.473051	3.78155e-08	0.0153986	-0.151753	0.0147642	1	fSpecific
ENSG00000092621	cg14476101	-0.835343	0	0	-0.820815	0	0	overlap
ENSG00000092621	cg16246545	-0.57616	0	0	-0.608846	0	0	overlap
ENSG00000134240	cg22718139	-0.459932	9.73256e-08	0.0396314	-0.499211	0	0	overlap
ENSG00000198483	cg11187916	-0.638495	0	0	-0.682578	0	0	overlap
ENSG00000198483	cg01000615	-0.566212	0	0	-0.365252	1.92655e-09	0.0007845	overlap
ENSG00000198483	cg26537883	0.566181	0	0	0.588027	0	0	overlap
ENSG00000168509	cg15553912	-0.592602	0	0	-0.541246	0	0	overlap
ENSG00000168509	cg14036143	-0.48432	1.61867e-08	0.00659127	-0.517179	0	0	overlap
ENSG00000168509	cg19624849	-0.552602	0	0	-0.541264	0	0	overlap
ENSG00000143368	cg25385116	0.50765	2.39728e-09	0.000976182	0.23465	0.000148348	1	fSpecific
ENSG00000014914	cg05750047	-0.494802	7.08031e-09	0.00288313	-0.600188	0	0	overlap
ENSG00000014914	cg00339782	-0.4811	2.07069e-08	0.00843191	-0.589573	0	0	overlap
ENSG00000136631	cg14601938	-0.524043	4.86532e-10	0.000198118	-0.114418	0.066543	1	fSpecific
ENSG00000118298	cg05037389	-0.614452	0	0	-0.619691	0	0	overlap
ENSG00000118298	cg19320294	-0.585045	0	0	-0.672601	0	0	overlap
ENSG00000118298	cg00561287	-0.577978	0	0	-0.587805	0	0	overlap
ENSG00000118298	cg00102955	-0.583361	0	0	-0.527276	0	0	overlap
ENSG00000159208	cg09563216	-0.508559	2.21161e-09	0.000900575	-0.44271	2.4768e-15	1.00856e-09	overlap
ENSG00000159208	cg00764612	-0.479422	2.35119e-08	0.00957414	-0.410293	9.39024e-12	3.82374e-06	overlap
ENSG00000159208	cg01464052	-0.468098	5.43024e-08	0.0221122	-0.371471	9.79277e-10	0.000398766	overlap
ENSG00000213190	cg21205392	-0.488823	1.14036e-08	0.00464358	-0.425535	1.03627e-12	4.21972e-07	overlap
ENSG00000143365	cg18149207	-0.459877	9.77058e-08	0.0397862	-0.362909	2.47641e-09	0.0010084	overlap
ENSG00000197747	cg26230275	-0.640381	0	0	-0.393873	7.45421e-11	3.03539e-05	overlap
ENSG00000163191	cg16382778	-0.535214	1.09273e-10	4.44963e-05	-0.214361	0.000541166	1	fSpecific
ENSG00000163220	cg02711163	-0.47533	3.19445e-08	0.0130079	-0.123747	0.0471229	1	fSpecific
ENSG00000188643	cg23499956	-0.654998	0	0	-0.591038	0	0	overlap
ENSG00000188643	cg23851011	-0.612885	0	0	-0.498869	0	0	overlap
ENSG00000189334	cg13098855	-0.506974	2.54427e-09	0.00103604	-0.655366	0	0	overlap
ENSG00000189334	cg25433648	-0.614519	0	0	-0.694913	0	0	overlap
ENSG00000169291	cg00006198	0.464535	7.01872e-08	0.0285805	0.29767	1.26123e-06	0.513578	fSpecific
ENSG00000169291	cg21860667	0.461634	8.62924e-08	0.0351386	0.310181	4.24911e-07	0.173025	fSpecific
ENSG00000163239	cg12590411	0.458077	1.10885e-07	0.0451526	0.379556	3.96912e-10	0.000161624	overlap
ENSG00000163239	cg22509057	0.552879	0	0	0.528774	0	0	overlap
ENSG00000143537	cg03379131	-0.601573	0	0	-0.529602	0	0	overlap
ENSG00000169241	cg26189283	-0.489862	1.05081e-08	0.00427895	-0.453549	0	0	overlap
ENSG00000143627	cg13497187	-0.509389	2.05364e-09	0.000836248	-0.519731	0	0	overlap
ENSG00000143627	cg00764632	-0.480694	2.13544e-08	0.00869558	-0.337728	3.24797e-08	0.0132259	overlap
ENSG00000116584	cg23320056	-0.537561	6.96336e-11	2.83551e-05	-0.440252	3.44499e-14	1.40282e-08	overlap
ENSG00000132698	cg09243900	-0.547674	0	0	-0.479805	0	0	overlap
ENSG00000132698	cg15896939	-0.464313	7.13068e-08	0.0290364	-0.430558	4.36578e-13	1.77776e-07	overlap
ENSG00000132698	cg19580810	-0.50427	3.21766e-09	0.00131024	-0.355406	5.45863e-09	0.00222278	overlap
ENSG00000160789	cg19238380	-0.49981	4.69311e-09	0.00191105	-0.239872	0.000104377	1	fSpecific
ENSG00000132677	cg17966560	-0.500264	4.51831e-09	0.00183987	-0.460113	0	0	overlap
ENSG00000132677	cg21297493	-0.557364	0	0	-0.535364	0	0	overlap
ENSG00000132692	cg07134230	-0.665966	0	0	-0.640932	0	0	overlap
ENSG00000132692	cg15101245	-0.707115	0	0	-0.683968	0	0	overlap
ENSG00000132692	cg15934095	-0.631226	0	0	-0.654753	0	0	overlap
ENSG00000132692	cg00330370	-0.520135	7.37237e-10	0.000300206	-0.466003	0	0	overlap
ENSG00000132692	cg25343618	-0.74126	0	0	-0.735506	0	0	overlap
ENSG00000158473	cg05338433	0.545696	0	0	0.556895	0	0	overlap
ENSG00000158473	cg10324825	0.572246	0	0	0.662984	0	0	overlap
ENSG00000158473	cg11719576	0.532584	1.66227e-10	6.76883e-05	0.667264	0	0	overlap
ENSG00000163565	cg19939130	0.502587	3.71534e-09	0.0015129	0.466386	0	0	overlap
ENSG00000132703	cg13968061	-0.524989	4.3767e-10	0.000178221	-0.40445	2.01034e-11	8.18617e-06	overlap
ENSG00000132703	cg21291134	-0.61796	0	0	-0.555684	0	0	overlap
ENSG00000132703	cg26353877	-0.598114	0	0	-0.491255	0	0	overlap
ENSG00000132693	cg04861230	-0.539293	4.59605e-11	1.87153e-05	-0.417934	3.27564e-12	1.33385e-06	overlap
ENSG00000132693	cg06779393	-0.733217	0	0	-0.795136	0	0	overlap
ENSG00000132693	cg14988790	-0.491484	9.2404e-09	0.00376273	-0.591662	0	0	overlap
ENSG00000132693	cg15553852	-0.667392	0	0	-0.732412	0	0	overlap
ENSG00000132693	cg01365152	-0.639871	0	0	-0.701852	0	0	overlap
ENSG00000158716	cg11566172	-0.48086	2.10872e-08	0.00858679	-0.358247	4.05655e-09	0.00165184	overlap
ENSG00000158710	cg03651478	-0.525339	4.206e-10	0.00017127	-0.30616	6.06021e-07	0.246774	fSpecific
ENSG00000158710	cg13562386	-0.564762	0	0	-0.420506	2.25216e-12	9.17087e-07	overlap
ENSG00000158710	cg13892570	-0.621124	0	0	-0.518382	0	0	overlap
ENSG00000158710	cg22698489	-0.591662	0	0	-0.425029	1.12404e-12	4.57714e-07	overlap
ENSG00000158710	cg21571466	-0.61855	0	0	-0.49573	0	0	overlap
ENSG00000085552	cg07175301	-0.464854	6.85996e-08	0.027934	-0.403751	2.19733e-11	8.94763e-06	overlap
ENSG00000085552	cg19773311	0.51522	1.19816e-09	0.000487894	0.616843	0	0	overlap
ENSG00000085552	cg21022868	0.50478	3.07941e-09	0.00125395	0.493175	0	0	overlap
ENSG00000085552	cg26417912	0.471072	4.373e-08	0.017807	0.549783	0	0	overlap
ENSG00000085552	cg26104196	-0.552971	0	0	-0.408868	1.13381e-11	4.61692e-06	overlap
ENSG00000162734	cg26835683	-0.529309	2.6054e-10	0.000106093	-0.331111	6.16089e-08	0.0250874	overlap
ENSG00000162738	cg24688563	0.541696	1.96495e-11	8.00137e-06	0.384188	2.33589e-10	9.51184e-05	overlap
ENSG00000158764	cg24528307	0.529425	2.56656e-10	0.000104511	0.598123	0	0	overlap
ENSG00000158769	cg00945666	-0.569284	0	0	-0.413886	5.77774e-12	2.35272e-06	overlap
ENSG00000158769	cg22170599	-0.537794	6.61871e-11	2.69517e-05	-0.588314	0	0	overlap
ENSG00000215845	cg11578532	-0.490341	1.01175e-08	0.0041199	-0.400882	3.15466e-11	1.28459e-05	overlap
ENSG00000132185	cg18889147	0.509616	2.01215e-09	0.000819354	0.229886	0.000203086	1	fSpecific
ENSG00000162746	cg07385423	-0.546599	0	0	-0.398314	4.33907e-11	1.76689e-05	overlap
ENSG00000162746	cg11141696	0.531668	1.89719e-10	7.72544e-05	0.568336	0	0	overlap
ENSG00000162746	cg17036419	0.510224	1.9048e-09	0.000775642	0.502816	0	0	overlap
ENSG00000162746	cg18200075	0.463115	7.76734e-08	0.0316289	0.400822	3.17844e-11	1.29427e-05	overlap
ENSG00000162746	cg18889147	0.532055	1.79534e-10	7.31071e-05	0.465001	0	0	overlap
ENSG00000162746	cg00160981	0.498919	5.05387e-09	0.00205796	0.480457	0	0	overlap
ENSG00000162746	cg22026255	0.487158	1.29908e-08	0.00528991	0.420013	2.42212e-12	9.86296e-07	overlap
ENSG00000162746	cg22678092	0.547791	0	0	0.490887	0	0	overlap
ENSG00000162746	cg27495845	0.46945	4.9226e-08	0.020045	0.431371	3.74654e-13	1.5256e-07	overlap
ENSG00000162746	cg26015133	0.501788	3.97533e-09	0.00161877	0.495628	0	0	overlap
ENSG00000162733	cg22740835	-0.463539	7.5361e-08	0.0306873	-0.39539	6.20446e-11	2.52648e-05	overlap
ENSG00000185630	cg03138364	0.648909	0	0	0.723157	0	0	overlap
ENSG00000185630	cg03323953	0.701929	0	0	0.722668	0	0	overlap
ENSG00000185630	cg02955020	0.733598	0	0	0.729443	0	0	overlap
ENSG00000185630	cg05804299	0.525413	4.17074e-10	0.000169834	0.596729	0	0	overlap
ENSG00000185630	cg05341781	0.4651	6.74017e-08	0.0274462	0.592327	0	0	overlap
ENSG00000185630	cg06221087	0.564485	0	0	0.63794	0	0	overlap
ENSG00000185630	cg04869770	0.520092	7.40494e-10	0.000301532	0.61686	0	0	overlap
ENSG00000185630	cg06909503	0.630261	0	0	0.645201	0	0	overlap
ENSG00000185630	cg06749480	0.523631	5.09099e-10	0.000207307	0.647103	0	0	overlap
ENSG00000185630	cg06750897	0.505677	2.84929e-09	0.00116024	0.425079	1.11516e-12	4.54096e-07	overlap
ENSG00000185630	cg07353489	0.644639	0	0	0.707982	0	0	overlap
ENSG00000185630	cg07152605	0.635656	0	0	0.704903	0	0	overlap
ENSG00000185630	cg09871424	0.731515	0	0	0.67595	0	0	overlap
ENSG00000185630	cg09023604	0.461856	8.49493e-08	0.0345917	0.520549	0	0	overlap
ENSG00000185630	cg08864944	0.580829	0	0	0.593882	0	0	overlap
ENSG00000185630	cg12629991	0.643662	0	0	0.656562	0	0	overlap
ENSG00000185630	cg12073907	0.511078	1.76271e-09	0.000717783	0.634013	0	0	overlap
ENSG00000185630	cg11514338	0.602906	0	0	0.606735	0	0	overlap
ENSG00000185630	cg17724789	0.549653	0	0	0.703615	0	0	overlap
ENSG00000185630	cg17240157	0.678071	0	0	0.704038	0	0	overlap
ENSG00000185630	cg15961657	0.631619	0	0	0.680942	0	0	overlap
ENSG00000185630	cg16397401	0.522323	5.86507e-10	0.000238828	0.642996	0	0	overlap
ENSG00000185630	cg16347868	0.493647	7.7721e-09	0.00316483	0.665273	0	0	overlap
ENSG00000185630	cg18757267	0.535005	1.13277e-10	4.6127e-05	0.552904	0	0	overlap
ENSG00000185630	cg18785787	0.516418	1.06769e-09	0.000434768	0.635016	0	0	overlap
ENSG00000185630	cg01554357	0.524946	4.39803e-10	0.000179089	0.538573	0	0	overlap
ENSG00000185630	cg21853707	0.591127	0	0	0.611629	0	0	overlap
ENSG00000185630	cg21962835	0.458347	1.08803e-07	0.0443048	0.58394	0	0	overlap
ENSG00000185630	cg22361413	0.627441	0	0	0.717664	0	0	overlap
ENSG00000185630	cg20825416	0.580756	0	0	0.688469	0	0	overlap
ENSG00000185630	cg20682146	0.486931	1.3223e-08	0.00538446	0.528348	0	0	overlap
ENSG00000185630	cg24477315	0.466261	6.20062e-08	0.0252492	0.60574	0	0	overlap
ENSG00000185630	cg24719489	0.614292	0	0	0.722575	0	0	overlap
ENSG00000185630	cg23043205	0.498286	5.32555e-09	0.00216859	0.589953	0	0	overlap
ENSG00000185630	cg24039780	0.628725	0	0	0.655546	0	0	overlap
ENSG00000185630	cg27532621	0.7287	0	0	0.75127	0	0	overlap
ENSG00000185630	cg26026748	0.556203	0	0	0.671153	0	0	overlap
ENSG00000188859	cg17940268	0.488295	1.18863e-08	0.00484017	0.468228	0	0	overlap
ENSG00000188859	cg24428232	0.549899	0	0	0.538575	0	0	overlap
ENSG00000188859	cg24554839	0.526359	3.73828e-10	0.000152224	0.567816	0	0	overlap
ENSG00000188859	cg25194322	0.484774	1.56292e-08	0.00636426	0.474323	0	0	overlap
ENSG00000143195	cg04093225	0.472565	3.91917e-08	0.015959	0.419798	2.4997e-12	1.01789e-06	overlap
ENSG00000143195	cg06445348	0.546538	0	0	0.415848	4.40202e-12	1.79252e-06	overlap
ENSG00000143195	cg06088759	0.473524	3.65184e-08	0.0148704	0.437637	8.91514e-14	3.63028e-08	overlap
ENSG00000143195	cg04724540	0.53871	5.3457e-11	2.17679e-05	0.428115	6.74585e-13	2.74694e-07	overlap
ENSG00000143195	cg06899530	0.58365	0	0	0.505147	0	0	overlap
ENSG00000143195	cg07134182	0.53981	3.97114e-11	1.61706e-05	0.59615	0	0	overlap
ENSG00000143195	cg09259179	0.480135	2.22786e-08	0.00907195	0.431615	3.57522e-13	1.45584e-07	overlap
ENSG00000143195	cg13081288	0.613192	0	0	0.723597	0	0	overlap
ENSG00000143195	cg01443394	0.47157	4.21644e-08	0.0171695	0.623647	0	0	overlap
ENSG00000143195	cg24833674	0.557296	0	0	0.626448	0	0	overlap
ENSG00000198821	cg05799811	-0.462919	7.87686e-08	0.0320749	-0.177249	0.00433925	1	fSpecific
ENSG00000198821	cg07786657	-0.508203	2.28277e-09	0.000929552	-0.265193	1.70119e-05	1	fSpecific
ENSG00000143162	cg12396057	-0.460823	9.13923e-08	0.0372153	-0.410107	9.62438e-12	3.91909e-06	overlap
ENSG00000143162	cg21783847	-0.531668	1.89719e-10	7.72544e-05	-0.472405	0	0	overlap
ENSG00000143158	cg08205865	-0.492928	8.23399e-09	0.00335291	-0.247186	6.2982e-05	1	fSpecific
ENSG00000143158	cg26859666	-0.459865	9.77904e-08	0.0398206	-0.307455	5.40823e-07	0.220225	fSpecific
ENSG00000197959	cg13446689	-0.525124	4.31018e-10	0.000175512	-0.183583	0.0031202	1	fSpecific
ENSG00000235750	cg19917639	0.527207	3.38084e-10	0.000137669	0.522811	0	0	overlap
ENSG00000235750	cg21266698	0.516891	1.01966e-09	0.000415211	0.560648	0	0	overlap
ENSG00000235750	cg27226320	0.462292	8.23588e-08	0.0335368	0.455226	0	0	overlap
ENSG00000116147	cg09586034	0.490605	9.90807e-09	0.00403461	0.47135	0	0	overlap
ENSG00000116183	cg17826980	0.474593	3.37414e-08	0.0137396	0.572295	0	0	overlap
ENSG00000198797	cg18766795	0.520541	7.07105e-10	0.000287936	0.344832	1.60686e-08	0.00654318	overlap
ENSG00000162783	cg02661372	-0.504455	3.16705e-09	0.00128964	-0.328708	7.74574e-08	0.031541	overlap
ENSG00000135821	cg03393238	-0.476227	2.98808e-08	0.0121676	-0.635874	0	0	overlap
ENSG00000135821	cg17214089	-0.483945	1.66603e-08	0.00678413	-0.660648	0	0	overlap
ENSG00000135821	cg00383081	-0.468276	5.36058e-08	0.0218285	-0.649023	0	0	overlap
ENSG00000058085	cg06211724	-0.482697	1.83325e-08	0.00746506	-0.26459	1.7802e-05	1	fSpecific
ENSG00000116667	cg03539970	0.540252	3.46259e-11	1.40998e-05	0.526522	0	0	overlap
ENSG00000116667	cg06533042	0.559515	0	0	0.458721	0	0	overlap
ENSG00000116667	cg07582892	0.483754	1.69059e-08	0.00688417	0.386425	1.80187e-10	7.33728e-05	overlap
ENSG00000116667	cg11201256	0.601315	0	0	0.529424	0	0	overlap
ENSG00000116667	cg14476364	0.518495	8.70365e-10	0.000354416	0.445509	0	0	overlap
ENSG00000116667	cg21777154	0.483195	1.76471e-08	0.00718595	0.428456	6.36033e-13	2.58995e-07	overlap
ENSG00000143341	cg03221073	0.561272	0	0	0.460714	0	0	overlap
ENSG00000143341	cg06533233	0.542114	1.57488e-11	6.41299e-06	0.405395	1.78106e-11	7.25255e-06	overlap
ENSG00000143341	cg09411231	0.54977	0	0	0.590908	0	0	overlap
ENSG00000143341	cg12728791	0.543257	5.98691e-12	2.4379e-06	0.558635	0	0	overlap
ENSG00000143341	cg11344217	0.547361	0	0	0.553328	0	0	overlap
ENSG00000143341	cg14531576	0.459127	1.03001e-07	0.0419422	0.578426	0	0	overlap
ENSG00000143341	cg24606662	0.521143	6.64258e-10	0.000270488	0.549527	0	0	overlap
ENSG00000143341	cg26276249	0.57549	0	0	0.616987	0	0	overlap
ENSG00000116690	cg12626411	-0.509198	2.08898e-09	0.000850643	-0.472483	0	0	overlap
ENSG00000116741	cg05374271	-0.518667	8.55516e-10	0.00034837	-0.410422	9.22997e-12	3.75848e-06	overlap
ENSG00000162687	cg02998017	-0.482814	1.81695e-08	0.00739868	-0.359161	3.68478e-09	0.00150046	overlap
ENSG00000163362	cg06854264	-0.635687	0	0	-0.479888	0	0	overlap
ENSG00000163362	cg11150074	-0.613647	0	0	-0.371718	9.52972e-10	0.000388054	overlap
ENSG00000163362	cg13419869	-0.488479	1.17158e-08	0.00477072	-0.268378	1.33649e-05	1	fSpecific
ENSG00000163362	cg13930047	-0.471238	4.32021e-08	0.0175921	-0.138837	0.0258151	1	fSpecific
ENSG00000163362	cg16257559	-0.63133	0	0	-0.548979	0	0	overlap
ENSG00000163362	cg00971747	-0.515625	1.15253e-09	0.000469317	-0.454644	0	0	overlap
ENSG00000159166	cg07596645	-0.482341	1.88387e-08	0.00767118	-0.21633	0.000479646	1	fSpecific
ENSG00000159166	cg09274810	-0.65219	0	0	-0.559379	0	0	overlap
ENSG00000159166	cg11418783	-0.61329	0	0	-0.529944	0	0	overlap
ENSG00000159166	cg17863139	-0.553745	0	0	-0.341256	2.29473e-08	0.00934422	overlap
ENSG00000159166	cg18692273	-0.618691	0	0	-0.551253	0	0	overlap
ENSG00000159166	cg23594208	-0.517948	9.19024e-10	0.00037423	-0.394148	7.21137e-11	2.9365e-05	overlap
ENSG00000159166	cg23291161	-0.529309	2.6054e-10	0.000106093	-0.357917	4.19941e-09	0.00171002	overlap
ENSG00000159166	cg23715582	-0.556535	0	0	-0.473026	0	0	overlap
ENSG00000159166	cg26539023	-0.469174	5.02261e-08	0.0204523	-0.400926	3.13734e-11	1.27754e-05	overlap
ENSG00000159166	cg27425612	-0.50223	3.82935e-09	0.00155932	-0.35153	8.14546e-09	0.00331686	overlap
ENSG00000159166	cg25947945	-0.555674	0	0	-0.474849	0	0	overlap
ENSG00000159173	cg11418783	-0.523502	5.16343e-10	0.000210257	-0.435834	1.44251e-13	5.87394e-08	overlap
ENSG00000159173	cg17863139	-0.497911	5.49277e-09	0.00223668	-0.362782	2.51005e-09	0.0010221	overlap
ENSG00000159173	cg23715582	-0.527189	3.38832e-10	0.000137974	-0.508124	0	0	overlap
ENSG00000159173	cg27425612	-0.524645	4.54966e-10	0.000185264	-0.281923	4.63261e-06	1	fSpecific
ENSG00000159173	cg25947945	-0.499275	4.90659e-09	0.00199798	-0.499578	0	0	overlap
ENSG00000174307	cg04055835	-0.580061	0	0	-0.564598	0	0	overlap
ENSG00000174307	cg08639762	-0.515041	1.21869e-09	0.000496256	-0.504865	0	0	overlap
ENSG00000174307	cg10773982	-0.478845	2.45585e-08	0.0100003	-0.360719	3.12561e-09	0.00127276	overlap
ENSG00000174307	cg12082516	0.513278	1.43911e-09	0.00058601	0.427637	7.31926e-13	2.98043e-07	overlap
ENSG00000174307	cg00962755	0.582869	0	0	0.391354	1.00805e-10	4.10482e-05	overlap
ENSG00000174307	cg20771670	-0.490802	9.75485e-09	0.00397221	-0.384969	2.13419e-10	8.69051e-05	overlap
ENSG00000174307	cg26120226	0.673942	0	0	0.694626	0	0	overlap
ENSG00000159176	cg04772818	-0.472922	3.81768e-08	0.0155457	-0.529735	0	0	overlap
ENSG00000159176	cg25018049	-0.504694	3.10234e-09	0.00126329	-0.455966	0	0	overlap
ENSG00000133067	cg04845625	-0.599269	0	0	-0.481716	0	0	overlap
ENSG00000163485	cg10111764	0.459883	9.76634e-08	0.0397689	0.482855	0	0	overlap
ENSG00000133048	cg03625911	-0.727564	0	0	-0.650375	0	0	overlap
ENSG00000133048	cg02097014	-0.603134	0	0	-0.520448	0	0	overlap
ENSG00000133048	cg07423149	-0.660252	0	0	-0.562556	0	0	overlap
ENSG00000133048	cg14085262	-0.628332	0	0	-0.514779	0	0	overlap
ENSG00000143845	cg07906527	-0.486077	1.41307e-08	0.0057541	-0.413293	6.26672e-12	2.55183e-06	overlap
ENSG00000170382	cg04309480	0.469512	4.90063e-08	0.0199556	0.384085	2.36396e-10	9.62613e-05	overlap
ENSG00000170382	cg13858742	0.528842	2.76502e-10	0.000112593	0.368892	1.29881e-09	0.000528879	overlap
ENSG00000170382	cg16488065	0.464252	7.16208e-08	0.0291643	0.406485	1.54752e-11	6.30155e-06	overlap
ENSG00000170382	cg01330815	0.461217	8.88847e-08	0.0361942	0.387577	1.57485e-10	6.41284e-05	overlap
ENSG00000184144	cg12269394	0.483484	1.72605e-08	0.00702856	0.376628	5.52241e-10	0.000224875	overlap
ENSG00000117266	cg06419732	0.586777	0	0	0.612728	0	0	overlap
ENSG00000117266	cg07008784	0.560166	0	0	0.617437	0	0	overlap
ENSG00000117266	cg15098085	0.465321	6.63406e-08	0.0270142	0.572755	0	0	overlap
ENSG00000117266	cg13474414	0.660639	0	0	0.655121	0	0	overlap
ENSG00000117266	cg24315209	0.713296	0	0	0.733758	0	0	overlap
ENSG00000158715	cg08639339	-0.585407	0	0	-0.613095	0	0	overlap
ENSG00000158715	cg10581876	-0.512123	1.6018e-09	0.000652258	-0.571045	0	0	overlap
ENSG00000158715	cg01455178	-0.597045	0	0	-0.641965	0	0	overlap
ENSG00000133065	cg03046812	-0.543226	6.23272e-12	2.53799e-06	-0.670262	0	0	overlap
ENSG00000133065	cg01654312	-0.511072	1.7637e-09	0.000718185	-0.517014	0	0	overlap
ENSG00000133065	cg26866142	0.463515	7.54932e-08	0.0307412	0.640995	0	0	overlap
ENSG00000162896	cg12751565	-0.644221	0	0	-0.487998	0	0	overlap
ENSG00000162897	cg19204946	-0.513425	1.41942e-09	0.000577995	-0.323471	1.26727e-07	0.0516037	fSpecific
ENSG00000182795	cg15485859	-0.462341	8.20716e-08	0.0334199	-0.401738	2.83407e-11	1.15405e-05	overlap
ENSG00000123838	cg17803430	-0.467275	5.76348e-08	0.0234691	-0.30881	4.79857e-07	0.1954	fSpecific
ENSG00000196352	cg22078638	-0.465573	6.51516e-08	0.02653	-0.384538	2.24343e-10	9.13533e-05	overlap
ENSG00000196352	cg23633330	0.506955	2.54839e-09	0.00103772	0.375157	6.50988e-10	0.000265085	overlap
ENSG00000174059	cg00785482	-0.530077	2.35746e-10	9.59966e-05	-0.333975	4.67835e-08	0.0190504	overlap
ENSG00000082512	cg11131549	-0.504289	3.21257e-09	0.00130817	-0.246177	6.75857e-05	1	fSpecific
ENSG00000123684	cg01168776	-0.47114	4.35142e-08	0.0177192	-0.367955	1.43835e-09	0.000585702	overlap
ENSG00000152104	cg22719308	-0.491134	9.50131e-09	0.00386897	-0.358529	3.93801e-09	0.00160357	overlap
ENSG00000152104	cg22400454	0.533475	1.4527e-10	5.91546e-05	0.646393	0	0	overlap
ENSG00000196482	cg10090568	0.549585	0	0	0.594081	0	0	overlap
ENSG00000196482	cg13490235	0.52043	7.15219e-10	0.00029124	0.603336	0	0	overlap
ENSG00000196482	cg18223579	0.546347	0	0	0.596401	0	0	overlap
ENSG00000196482	cg00804995	0.500756	4.33611e-09	0.00176568	0.495678	0	0	overlap
ENSG00000196482	cg01432520	0.535625	1.01622e-10	4.13808e-05	0.655294	0	0	overlap
ENSG00000196482	cg24346507	0.514378	1.2979e-09	0.000528508	0.545283	0	0	overlap
ENSG00000186205	cg07185695	-0.563361	0	0	-0.357474	4.39898e-09	0.00179128	overlap
ENSG00000186205	cg18113803	0.557604	0	0	0.547175	0	0	overlap
ENSG00000143502	cg05708255	0.532098	1.78426e-10	7.26557e-05	0.662519	0	0	overlap
ENSG00000143502	cg07191791	0.583619	0	0	0.643566	0	0	overlap
ENSG00000143502	cg09416903	0.553444	0	0	0.634453	0	0	overlap
ENSG00000143502	cg11147878	0.513333	1.4317e-09	0.000582993	0.498785	0	0	overlap
ENSG00000143502	cg24486540	0.606888	0	0	0.734649	0	0	overlap
ENSG00000143502	cg25743622	0.502654	3.69408e-09	0.00150424	0.595401	0	0	overlap
ENSG00000162909	cg07395969	-0.585966	0	0	-0.496456	0	0	overlap
ENSG00000162909	cg18224445	-0.5731	0	0	-0.442536	4.25993e-15	1.73466e-09	overlap
ENSG00000243709	cg12319004	-0.539846	3.92782e-11	1.59942e-05	-0.315188	2.71167e-07	0.11042	fSpecific
ENSG00000243709	cg15604953	-0.510636	1.83508e-09	0.000747253	-0.216739	0.000467718	1	fSpecific
ENSG00000243709	cg17950169	-0.461438	8.75032e-08	0.0356317	-0.266066	1.59282e-05	1	fSpecific
ENSG00000143816	cg25940008	0.460111	9.61103e-08	0.0391365	0.258386	2.82107e-05	1	fSpecific
ENSG00000154342	cg13226669	0.457499	1.1546e-07	0.0470159	0.143128	0.0215384	1	fSpecific
ENSG00000154358	cg03033447	0.509174	2.09359e-09	0.000852517	0.367626	1.49057e-09	0.000606965	overlap
ENSG00000154358	cg08723571	0.5382	6.03971e-11	2.45939e-05	0.420542	2.24006e-12	9.12161e-07	overlap
ENSG00000154358	cg13107669	0.493051	8.15325e-09	0.00332004	0.297285	1.30317e-06	0.530656	fSpecific
ENSG00000154358	cg11852843	0.58137	0	0	0.301341	9.21204e-07	0.375118	fSpecific
ENSG00000154358	cg00964355	0.478759	2.47181e-08	0.0100653	0.343479	1.83971e-08	0.00749139	overlap
ENSG00000154358	cg00901843	-0.498372	5.28785e-09	0.00215323	-0.119718	0.0548331	1	fSpecific
ENSG00000154358	cg01195848	0.565395	0	0	0.357081	4.58353e-09	0.00186643	overlap
ENSG00000154358	cg20775370	0.535957	9.56814e-11	3.89619e-05	0.295693	1.49125e-06	0.607245	fSpecific
ENSG00000154358	cg21407117	-0.593763	0	0	-0.277617	6.52627e-06	1	fSpecific
ENSG00000154358	cg23630430	0.572129	0	0	0.347914	1.17773e-08	0.00479576	overlap
ENSG00000162931	cg02952008	-0.49678	6.02715e-09	0.00245428	-0.304418	7.05621e-07	0.287332	fSpecific
ENSG00000181218	cg03449175	-0.581051	0	0	-0.341553	2.22818e-08	0.00907323	overlap
ENSG00000181218	cg06034933	-0.626341	0	0	-0.532097	0	0	overlap
ENSG00000181218	cg06757385	-0.517997	9.14557e-10	0.000372411	-0.411144	8.38048e-12	3.41256e-06	overlap
ENSG00000181218	cg07225598	-0.575312	0	0	-0.37467	6.87242e-10	0.000279848	overlap
ENSG00000181218	cg11343017	-0.536657	8.37772e-11	3.41144e-05	-0.302374	8.42637e-07	0.343125	fSpecific
ENSG00000181218	cg11672054	-0.554562	0	0	-0.43289	2.77682e-13	1.13073e-07	overlap
ENSG00000181218	cg14743462	-0.59549	0	0	-0.343499	1.836e-08	0.00747626	overlap
ENSG00000181218	cg14541950	-0.579054	0	0	-0.309431	4.54193e-07	0.184949	fSpecific
ENSG00000181218	cg15471815	-0.511023	1.77162e-09	0.000721409	-0.466661	0	0	overlap
ENSG00000181218	cg15481636	-0.528406	2.92048e-10	0.000118923	-0.257664	2.9743e-05	1	fSpecific
ENSG00000181218	cg13449295	-0.570132	0	0	-0.29661	1.38002e-06	0.561951	fSpecific
ENSG00000181218	cg14159336	-0.46572	6.44651e-08	0.0262504	-0.455897	0	0	overlap
ENSG00000181218	cg17515024	-0.494157	7.45924e-09	0.00303743	-0.440876	2.48302e-14	1.0111e-08	overlap
ENSG00000181218	cg00146645	-0.488891	1.13432e-08	0.00461899	-0.338064	3.14261e-08	0.0127968	overlap
ENSG00000181218	cg00112780	-0.557118	0	0	-0.427224	7.8475e-13	3.19553e-07	overlap
ENSG00000181218	cg21453443	-0.623121	0	0	-0.500586	0	0	overlap
ENSG00000181218	cg21453831	-0.510796	1.80865e-09	0.000736489	-0.442851	1.08386e-15	4.41352e-10	overlap
ENSG00000181218	cg21401647	-0.508442	2.23469e-09	0.000909976	-0.310581	4.10039e-07	0.16697	fSpecific
ENSG00000181218	cg25272655	-0.554316	0	0	-0.463604	0	0	overlap
ENSG00000177614	cg03469233	0.568983	0	0	0.560268	0	0	overlap
ENSG00000177614	cg03424127	0.487932	1.22286e-08	0.00497953	0.376356	5.69326e-10	0.000231832	overlap
ENSG00000177614	cg10877049	0.58996	0	0	0.496034	0	0	overlap
ENSG00000177614	cg11176853	0.504578	3.13371e-09	0.00127606	0.435952	1.40135e-13	5.70635e-08	overlap
ENSG00000177614	cg17039722	0.60416	0	0	0.629033	0	0	overlap
ENSG00000177614	cg17494334	0.595803	0	0	0.484287	0	0	overlap
ENSG00000177614	cg00075975	0.506575	2.63492e-09	0.00107295	0.490686	0	0	overlap
ENSG00000177614	cg20699340	0.495699	6.58318e-09	0.0026807	0.4797	0	0	overlap
ENSG00000119280	cg02206259	-0.534912	1.15071e-10	4.68573e-05	-0.315667	2.59645e-07	0.105728	fSpecific
ENSG00000119280	cg09107053	-0.512	1.62003e-09	0.000659681	-0.504603	0	0	overlap
ENSG00000182118	cg02464665	0.457161	1.18221e-07	0.0481399	0.541966	0	0	overlap
ENSG00000116991	cg03383695	0.493849	7.64627e-09	0.00311359	0.577217	0	0	overlap
ENSG00000116991	cg02414710	0.494396	7.31634e-09	0.00297924	0.580139	0	0	overlap
ENSG00000116991	cg08658124	0.562316	0	0	0.627742	0	0	overlap
ENSG00000116991	cg07386008	0.466181	6.23637e-08	0.0253948	0.568922	0	0	overlap
ENSG00000116991	cg15472485	0.487367	1.27808e-08	0.00520441	0.449746	0	0	overlap
ENSG00000212916	cg05460318	-0.47267	3.88916e-08	0.0158368	-0.366417	1.69903e-09	0.00069185	overlap
ENSG00000212916	cg06935979	-0.501684	4.01054e-09	0.00163311	-0.39409	7.26141e-11	2.95687e-05	overlap
ENSG00000135749	cg07220862	0.488043	1.21232e-08	0.00493662	0.668596	0	0	overlap
ENSG00000135749	cg16056164	0.569794	0	0	0.4936	0	0	overlap
ENSG00000135749	cg00697486	0.509831	1.97359e-09	0.000803655	0.545507	0	0	overlap
ENSG00000135749	cg01883208	0.585819	0	0	0.629242	0	0	overlap
ENSG00000135749	cg25003357	0.514906	1.23448e-09	0.000502683	0.604146	0	0	overlap
ENSG00000135750	cg13110283	-0.569548	0	0	-0.447553	0	0	overlap
ENSG00000135750	cg24809845	0.462261	8.25387e-08	0.0336101	0.377157	5.20402e-10	0.00021191	overlap
ENSG00000168243	cg05593139	0.488829	1.13981e-08	0.00464134	0.35203	7.7381e-09	0.00315099	overlap
ENSG00000168243	cg04576607	0.546998	0	0	0.424206	1.28094e-12	5.21604e-07	overlap
ENSG00000186197	cg03041808	0.591195	0	0	0.508608	0	0	overlap
ENSG00000133019	cg15108640	0.477106	2.79827e-08	0.0113947	0.295211	1.55305e-06	0.63241	fSpecific
ENSG00000162849	cg00943287	0.456731	1.21825e-07	0.0496076	0.503722	0	0	overlap
ENSG00000162714	cg03734302	0.482138	1.91326e-08	0.00779085	0.738287	0	0	overlap
ENSG00000162714	cg03864005	0.502685	3.68445e-09	0.00150032	0.678495	0	0	overlap
ENSG00000162714	cg02556381	0.501819	3.96503e-09	0.00161458	0.720809	0	0	overlap
ENSG00000162714	cg04364251	0.480909	2.10086e-08	0.0085548	0.702966	0	0	overlap
ENSG00000162714	cg06825317	0.538728	5.32131e-11	2.16686e-05	0.613031	0	0	overlap
ENSG00000162714	cg11164537	0.491336	9.34943e-09	0.00380712	0.688534	0	0	overlap
ENSG00000162714	cg16823976	0.522335	5.85738e-10	0.000238515	0.589233	0	0	overlap
ENSG00000162714	cg20289854	0.484756	1.56514e-08	0.00637332	0.634354	0	0	overlap
ENSG00000162714	cg23616126	0.492995	8.18949e-09	0.00333479	0.703294	0	0	overlap
ENSG00000184731	cg07058971	-0.559373	0	0	-0.440737	2.68763e-14	1.09441e-08	overlap
ENSG00000118004	cg03579365	-0.490187	1.02412e-08	0.00417026	-0.491148	0	0	overlap
ENSG00000118004	cg20362060	0.468922	5.11541e-08	0.0208302	0.392226	9.084e-11	3.69904e-05	overlap
ENSG00000118004	cg23859888	0.479318	2.3698e-08	0.00964992	0.460142	0	0	overlap
ENSG00000118004	cg27472937	0.482968	1.79571e-08	0.0073122	0.410562	9.05876e-12	3.68876e-06	overlap
ENSG00000151360	cg05977776	0.522599	5.69407e-10	0.000231865	0.34478	1.61521e-08	0.00657719	overlap
ENSG00000134317	cg10162971	-0.613075	0	0	-0.578099	0	0	overlap
ENSG00000115758	cg15075241	-0.537942	6.40532e-11	2.60827e-05	-0.404014	2.12509e-11	8.65345e-06	overlap
ENSG00000196208	cg08034990	0.466482	6.10263e-08	0.0248502	0.476693	0	0	overlap
ENSG00000196208	cg10612997	0.482679	1.83583e-08	0.00747559	0.460298	0	0	overlap
ENSG00000196208	cg10899175	-0.579318	0	0	-0.49994	0	0	overlap
ENSG00000196208	cg17208060	-0.544608	0	0	-0.493917	0	0	overlap
ENSG00000196208	cg26631397	-0.584608	0	0	-0.650361	0	0	overlap
ENSG00000196208	cg24737570	0.527318	3.33621e-10	0.000135852	0.542261	0	0	overlap
ENSG00000196208	cg25744579	0.518194	8.96876e-10	0.000365211	0.636775	0	0	overlap
ENSG00000134324	cg00523161	-0.493831	7.65763e-09	0.00311822	-0.535342	0	0	overlap
ENSG00000134323	cg06520300	-0.504971	3.02918e-09	0.00123349	-0.447526	0	0	overlap
ENSG00000197872	cg10288578	0.476104	3.01558e-08	0.0122796	0.375583	6.20741e-10	0.000252768	overlap
ENSG00000197872	cg10090418	0.592135	0	0	0.36749	1.51276e-09	0.000616004	overlap
ENSG00000214842	cg23101885	0.50306	3.56881e-09	0.00145323	0.339029	2.85866e-08	0.0116406	overlap
ENSG00000163032	cg18121713	0.465653	6.47789e-08	0.0263782	0.247404	6.20263e-05	1	fSpecific
ENSG00000163032	cg23483069	0.565462	0	0	0.512701	0	0	overlap
ENSG00000170745	cg04313995	0.45879	1.05476e-07	0.0429503	0.411532	7.95534e-12	3.23945e-06	overlap
ENSG00000170745	cg03711717	0.659343	0	0	0.529316	0	0	overlap
ENSG00000170745	cg04470085	0.653475	0	0	0.49061	0	0	overlap
ENSG00000170745	cg08187110	0.466015	6.31126e-08	0.0256997	0.334241	4.5592e-08	0.0185652	overlap
ENSG00000170745	cg05194509	0.49267	8.40597e-09	0.00342294	0.449288	0	0	overlap
ENSG00000170745	cg05417035	0.46137	8.79232e-08	0.0358027	0.370736	1.06158e-09	0.00043228	overlap
ENSG00000170745	cg00060627	0.530833	2.13025e-10	8.67448e-05	0.438298	7.28351e-14	2.96587e-08	overlap
ENSG00000170745	cg00995141	0.514415	1.29338e-09	0.00052667	0.310788	4.02579e-07	0.163932	fSpecific
ENSG00000170745	cg25420747	0.603803	0	0	0.48942	0	0	overlap
ENSG00000143867	cg03489023	0.527607	3.22176e-10	0.000131191	0.397506	4.79225e-11	1.95142e-05	overlap
ENSG00000143867	cg07531268	0.489241	1.1035e-08	0.00449349	0.52953	0	0	overlap
ENSG00000143867	cg09619390	0.528098	3.03376e-10	0.000123536	0.581489	0	0	overlap
ENSG00000143867	cg11943209	0.558636	0	0	0.637836	0	0	overlap
ENSG00000143867	cg12619940	0.48424	1.62865e-08	0.00663193	0.524771	0	0	overlap
ENSG00000143867	cg16752876	0.581057	0	0	0.562959	0	0	overlap
ENSG00000143867	cg17097782	0.477991	2.61874e-08	0.0106636	0.462975	0	0	overlap
ENSG00000143867	cg15440868	0.511637	1.67488e-09	0.000682016	0.474748	0	0	overlap
ENSG00000143867	cg20707692	0.60843	0	0	0.467343	0	0	overlap
ENSG00000143867	cg02172492	0.570028	0	0	0.592262	0	0	overlap
ENSG00000143867	cg22478121	0.548344	0	0	0.465657	0	0	overlap
ENSG00000143867	cg27117509	0.530003	2.3805e-10	9.69348e-05	0.554745	0	0	overlap
ENSG00000119771	cg02531431	0.511662	1.67111e-09	0.000680481	0.503548	0	0	overlap
ENSG00000119771	cg07485554	0.46537	6.6107e-08	0.026919	0.407281	1.39566e-11	5.68318e-06	overlap
ENSG00000119771	cg05930000	0.593653	0	0	0.627567	0	0	overlap
ENSG00000119771	cg08569786	0.599631	0	0	0.613524	0	0	overlap
ENSG00000119771	cg11985887	0.466255	6.20337e-08	0.0252604	0.483189	0	0	overlap
ENSG00000119771	cg16704797	0.481585	1.99563e-08	0.00812627	0.525831	0	0	overlap
ENSG00000119771	cg17129809	0.50561	2.86607e-09	0.00116707	0.472914	0	0	overlap
ENSG00000119771	cg15073625	0.491828	8.99062e-09	0.00366102	0.537786	0	0	overlap
ENSG00000119771	cg15748555	0.544258	0	0	0.604786	0	0	overlap
ENSG00000119771	cg19788941	0.607988	0	0	0.532691	0	0	overlap
ENSG00000119771	cg19371706	0.461186	8.90783e-08	0.036273	0.539612	0	0	overlap
ENSG00000119771	cg18988938	0.518974	8.29534e-10	0.000337789	0.456117	0	0	overlap
ENSG00000119771	cg01871526	0.515748	1.13901e-09	0.00046381	0.551302	0	0	overlap
ENSG00000119771	cg01821088	0.64263	0	0	0.617714	0	0	overlap
ENSG00000119771	cg00450990	0.508363	2.25062e-09	0.00091646	0.554121	0	0	overlap
ENSG00000119771	cg00708035	0.516504	1.05882e-09	0.000431155	0.501361	0	0	overlap
ENSG00000119771	cg22545361	0.469382	4.94687e-08	0.0201438	0.482653	0	0	overlap
ENSG00000119771	cg26202529	0.596264	0	0	0.545702	0	0	overlap
ENSG00000119771	cg27297315	0.472221	4.0196e-08	0.016368	0.585712	0	0	overlap
ENSG00000119782	cg13401339	-0.571422	0	0	-0.413102	6.43258e-12	2.61937e-06	overlap
ENSG00000119782	cg12906859	0.482562	1.8523e-08	0.00754262	0.385037	2.11732e-10	8.62181e-05	overlap
ENSG00000119782	cg01417669	-0.600369	0	0	-0.667456	0	0	overlap
ENSG00000119782	cg00284173	-0.5647	0	0	-0.422308	1.71798e-12	6.99567e-07	overlap
ENSG00000115129	cg07979316	-0.501014	4.2432e-09	0.00172785	-0.299441	1.08443e-06	0.441586	fSpecific
ENSG00000176732	cg17081976	-0.534095	1.3171e-10	5.36329e-05	-0.36127	2.94838e-09	0.00120059	overlap
ENSG00000084764	cg06350345	-0.464461	7.05585e-08	0.0287317	-0.371996	9.24284e-10	0.000376372	overlap
ENSG00000115194	cg24594459	0.491582	9.16838e-09	0.0037334	0.451829	0	0	overlap
ENSG00000163794	cg06536868	0.462808	7.93911e-08	0.0323284	0.695675	0	0	overlap
ENSG00000163794	cg19535672	0.480596	2.15142e-08	0.00876067	0.664225	0	0	overlap
ENSG00000157992	cg04845466	-0.721333	0	0	-0.617631	0	0	overlap
ENSG00000157992	cg02592271	-0.757573	0	0	-0.748159	0	0	overlap
ENSG00000157992	cg12000995	-0.760406	0	0	-0.727309	0	0	overlap
ENSG00000157992	cg11618577	-0.75235	0	0	-0.748756	0	0	overlap
ENSG00000157992	cg12648201	-0.780608	0	0	-0.740217	0	0	overlap
ENSG00000157992	cg17158414	-0.774679	0	0	-0.742491	0	0	overlap
ENSG00000157992	cg20102877	-0.812369	0	0	-0.776074	0	0	overlap
ENSG00000157992	cg18428193	-0.534329	1.26818e-10	5.16409e-05	-0.472491	0	0	overlap
ENSG00000157992	cg21248554	-0.739674	0	0	-0.736056	0	0	overlap
ENSG00000157992	cg24768116	-0.6902	0	0	-0.682939	0	0	overlap
ENSG00000157992	cg26034919	-0.809935	0	0	-0.783923	0	0	overlap
ENSG00000115226	cg15062470	-0.486181	1.40167e-08	0.00570764	-0.381566	3.15709e-10	0.000128558	overlap
ENSG00000115226	cg00360324	-0.6571	0	0	-0.681037	0	0	overlap
ENSG00000115295	cg09142141	0.537014	7.80393e-11	3.17779e-05	0.682241	0	0	overlap
ENSG00000115295	cg13417951	0.546261	0	0	0.597797	0	0	overlap
ENSG00000115295	cg23854728	0.548817	0	0	0.525715	0	0	overlap
ENSG00000115295	cg25095187	0.470427	4.5842e-08	0.0186671	0.340668	2.43229e-08	0.00990437	overlap
ENSG00000162949	cg14553549	0.519226	8.08728e-10	0.000329317	0.4019	2.77668e-11	1.13067e-05	overlap
ENSG00000162949	cg19304003	0.634347	0	0	0.491536	0	0	overlap
ENSG00000162949	cg00260012	0.546618	0	0	0.469033	0	0	overlap
ENSG00000162949	cg00791548	0.569425	0	0	0.461197	0	0	overlap
ENSG00000162949	cg23550429	0.536694	8.31739e-11	3.38687e-05	0.375439	6.308e-10	0.000256864	overlap
ENSG00000158125	cg18018530	0.481776	1.96688e-08	0.00800922	0.445949	0	0	overlap
ENSG00000049323	cg18658787	0.485868	1.43616e-08	0.00584809	0.471168	0	0	overlap
ENSG00000150938	cg19145710	0.515189	1.20167e-09	0.000489327	0.630448	0	0	overlap
ENSG00000162878	cg13773247	-0.753641	0	0	-0.650616	0	0	overlap
ENSG00000162878	cg18882156	-0.740946	0	0	-0.665168	0	0	overlap
ENSG00000162878	cg22476504	-0.541978	1.69906e-11	6.91866e-06	-0.385217	2.07368e-10	8.44412e-05	overlap
ENSG00000138075	cg04680150	-0.518992	8.27996e-10	0.000337163	-0.35873	3.85585e-09	0.00157012	overlap
ENSG00000138075	cg07681696	-0.521063	6.69815e-10	0.000272751	-0.37271	8.54154e-10	0.000347815	overlap
ENSG00000138075	cg10317145	-0.588928	0	0	-0.429774	5.03846e-13	2.05168e-07	overlap
ENSG00000138075	cg11113753	-0.602353	0	0	-0.405114	1.84645e-11	7.51882e-06	overlap
ENSG00000138075	cg08453096	-0.458747	1.05795e-07	0.0430802	-0.316935	2.31385e-07	0.0942209	fSpecific
ENSG00000138075	cg13341470	-0.580989	0	0	-0.417465	3.50271e-12	1.42632e-06	overlap
ENSG00000138075	cg11467440	-0.620823	0	0	-0.453261	0	0	overlap
ENSG00000138075	cg16451365	-0.571324	0	0	-0.465323	0	0	overlap
ENSG00000138075	cg20926720	-0.56	0	0	-0.390893	1.06492e-10	4.33638e-05	overlap
ENSG00000138075	cg18281102	-0.563459	0	0	-0.395357	6.22925e-11	2.53657e-05	overlap
ENSG00000138075	cg19123339	-0.550052	0	0	-0.428807	5.9832e-13	2.43638e-07	overlap
ENSG00000138075	cg01186613	-0.472006	4.08361e-08	0.0166286	-0.566712	0	0	overlap
ENSG00000138075	cg00459909	-0.514273	1.31076e-09	0.000533748	-0.356982	4.63133e-09	0.0018859	overlap
ENSG00000138075	cg00009421	-0.560332	0	0	-0.404134	2.09299e-11	8.52273e-06	overlap
ENSG00000138075	cg00760272	-0.536338	8.91022e-11	3.62828e-05	-0.468531	0	0	overlap
ENSG00000138075	cg00705576	-0.595508	0	0	-0.423983	1.32657e-12	5.40185e-07	overlap
ENSG00000138075	cg21783355	-0.543207	6.38064e-12	2.59822e-06	-0.410863	8.70163e-12	3.54334e-06	overlap
ENSG00000138075	cg22207732	-0.531103	2.05282e-10	8.35918e-05	-0.385472	2.0132e-10	8.19782e-05	overlap
ENSG00000138075	cg26706238	-0.539441	4.41395e-11	1.79738e-05	-0.41837	3.07698e-12	1.25296e-06	overlap
ENSG00000143921	cg04680150	-0.466992	5.88231e-08	0.023953	-0.253507	4.02056e-05	1	fSpecific
ENSG00000143921	cg10317145	-0.493831	7.65763e-09	0.00311822	-0.314471	2.89303e-07	0.117805	fSpecific
ENSG00000143921	cg11113753	-0.482009	1.93218e-08	0.00786792	-0.316235	2.46599e-07	0.100416	fSpecific
ENSG00000143921	cg13341470	-0.494691	7.14396e-09	0.00290905	-0.329445	7.22189e-08	0.0294078	overlap
ENSG00000143921	cg11467440	-0.494353	7.3418e-09	0.00298961	-0.333861	4.72978e-08	0.0192599	overlap
ENSG00000143921	cg16451365	-0.486175	1.40233e-08	0.00571036	-0.37952	3.98551e-10	0.000162291	overlap
ENSG00000143921	cg20926720	-0.48102	2.08329e-08	0.00848324	-0.275163	7.91447e-06	1	fSpecific
ENSG00000143921	cg18281102	-0.470728	4.48446e-08	0.0182609	-0.315678	2.59382e-07	0.105621	fSpecific
ENSG00000143921	cg19123339	-0.502347	3.79165e-09	0.00154398	-0.336699	3.59128e-08	0.0146238	overlap
ENSG00000143921	cg00760272	-0.50569	2.84625e-09	0.00115901	-0.396661	5.31457e-11	2.16411e-05	overlap
ENSG00000143921	cg00705576	-0.50306	3.56881e-09	0.00145323	-0.335574	4.00684e-08	0.016316	overlap
ENSG00000143921	cg21783355	-0.461788	8.53576e-08	0.034758	-0.309576	4.48375e-07	0.18258	fSpecific
ENSG00000119737	cg13356253	-0.463625	7.48999e-08	0.0304995	-0.482258	0	0	overlap
ENSG00000119737	cg12451530	-0.483355	1.74322e-08	0.00709847	-0.473461	0	0	overlap
ENSG00000119737	cg19961545	-0.483871	1.6755e-08	0.00682269	-0.485739	0	0	overlap
ENSG00000119737	cg19592277	-0.53396	1.34594e-10	5.48072e-05	-0.535674	0	0	overlap
ENSG00000119737	cg00701946	-0.474359	3.43302e-08	0.0139794	-0.468926	0	0	overlap
ENSG00000115507	cg03655683	0.488172	1.20013e-08	0.00488699	0.401935	2.76451e-11	1.12572e-05	overlap
ENSG00000115507	cg00463767	0.478912	2.44338e-08	0.00994953	0.49871	0	0	overlap
ENSG00000115507	cg21472506	0.513696	1.38395e-09	0.00056355	0.394357	7.03113e-11	2.8631e-05	overlap
ENSG00000169764	cg19931529	-0.525684	4.04342e-10	0.00016465	-0.554714	0	0	overlap
ENSG00000115902	cg21437521	-0.504485	3.15869e-09	0.00128623	-0.395681	5.98915e-11	2.4388e-05	overlap
ENSG00000115902	cg24913324	-0.465935	6.34762e-08	0.0258478	-0.359223	3.66072e-09	0.00149066	overlap
ENSG00000011523	cg00018198	-0.463287	7.6727e-08	0.0312435	-0.38997	1.18815e-10	4.83819e-05	overlap
ENSG00000115956	cg10812236	-0.489794	1.05643e-08	0.00430184	-0.36643	1.69672e-09	0.000690911	overlap
ENSG00000196975	cg17719951	-0.532129	1.77637e-10	7.23344e-05	-0.328295	8.055e-08	0.0328003	overlap
ENSG00000196975	cg02329386	-0.620971	0	0	-0.244958	7.35764e-05	1	fSpecific
ENSG00000116035	cg04063045	0.58972	0	0	0.292306	1.98132e-06	0.806802	fSpecific
ENSG00000116035	cg03711129	0.586605	0	0	0.380915	3.40076e-10	0.00013848	overlap
ENSG00000116035	cg09543478	0.645911	0	0	0.435372	1.61237e-13	6.56565e-08	overlap
ENSG00000116035	cg19185846	0.544233	0	0	0.260775	2.36585e-05	1	fSpecific
ENSG00000116035	cg01719210	-0.569555	0	0	-0.171296	0.00586072	1	fSpecific
ENSG00000144031	cg15165122	-0.655054	0	0	-0.668928	0	0	overlap
ENSG00000144031	cg00421335	-0.676627	0	0	-0.662993	0	0	overlap
ENSG00000124374	cg19327341	-0.530298	2.28928e-10	9.32205e-05	-0.35692	4.66119e-09	0.00189806	overlap
ENSG00000135636	cg13066889	0.463957	7.31465e-08	0.0297855	0.321909	1.46526e-07	0.0596658	fSpecific
ENSG00000003137	cg06122697	0.465038	6.76993e-08	0.0275674	0.375435	6.31096e-10	0.000256985	overlap
ENSG00000135638	cg07279070	0.529696	2.47822e-10	0.000100914	0.452964	0	0	overlap
ENSG00000135638	cg06498720	0.51208	1.60816e-09	0.000654848	0.399469	3.76136e-11	1.53164e-05	overlap
ENSG00000135638	cg08800878	0.525124	4.31018e-10	0.000175512	0.467395	0	0	overlap
ENSG00000135638	cg13295852	0.471601	4.20695e-08	0.0171309	0.416816	3.84101e-12	1.56407e-06	overlap
ENSG00000135638	cg16314401	-0.511982	1.62278e-09	0.000660801	-0.328075	8.22466e-08	0.0334911	overlap
ENSG00000135638	cg14940308	-0.478304	2.55782e-08	0.0104155	-0.291771	2.07154e-06	0.843538	fSpecific
ENSG00000135638	cg14848284	-0.540406	3.29166e-11	1.34038e-05	-0.300945	9.53169e-07	0.388134	fSpecific
ENSG00000135638	cg18704110	-0.471644	4.19371e-08	0.0170769	-0.306923	5.66761e-07	0.230787	fSpecific
ENSG00000135638	cg01695225	0.542212	1.48577e-11	6.0501e-06	0.387994	1.49966e-10	6.10669e-05	overlap
ENSG00000135638	cg00486564	0.46279	7.94953e-08	0.0323708	0.453162	0	0	overlap
ENSG00000135638	cg00866399	0.547975	0	0	0.458639	0	0	overlap
ENSG00000135638	cg23061718	-0.489665	1.06724e-08	0.00434586	-0.264441	1.80021e-05	1	fSpecific
ENSG00000135638	cg23851476	-0.541376	2.27592e-11	9.26762e-06	-0.288365	2.74559e-06	1	fSpecific
ENSG00000135638	cg21351994	-0.480805	2.11759e-08	0.00862291	-0.267745	1.40255e-05	1	fSpecific
ENSG00000135638	cg22539450	0.520197	7.32604e-10	0.000298319	0.498831	0	0	overlap
ENSG00000135638	cg26898166	-0.507613	2.4051e-09	0.000979364	-0.269631	1.21448e-05	1	fSpecific
ENSG00000135638	cg26704870	-0.473088	3.77129e-08	0.0153568	-0.325959	1.00412e-07	0.0408881	overlap
ENSG00000144045	cg06151718	-0.709186	0	0	-0.591659	0	0	overlap
ENSG00000144045	cg01410453	-0.68408	0	0	-0.564528	0	0	overlap
ENSG00000144045	cg02034222	-0.672743	0	0	-0.510448	0	0	overlap
ENSG00000144045	cg25182501	0.467724	5.5796e-08	0.0227204	0.373165	8.12235e-10	0.000330746	overlap
ENSG00000144045	cg24544105	-0.68725	0	0	-0.554162	0	0	overlap
ENSG00000135622	cg19582212	-0.483343	1.74487e-08	0.00710517	-0.501068	0	0	overlap
ENSG00000135622	cg01477253	0.521954	6.09955e-10	0.000248376	0.744875	0	0	overlap
ENSG00000159399	cg22638977	0.50263	3.7018e-09	0.00150739	0.507239	0	0	overlap
ENSG00000115363	cg16720807	-0.510452	1.86601e-09	0.000759848	-0.346711	1.33012e-08	0.0054163	overlap
ENSG00000176204	cg21787997	0.463361	7.63248e-08	0.0310797	0.506203	0	0	overlap
ENSG00000172016	cg02005771	0.468154	5.40853e-08	0.0220238	0.534729	0	0	overlap
ENSG00000066032	cg11074070	0.513868	1.36179e-09	0.000554524	0.510176	0	0	overlap
ENSG00000066032	cg10821830	0.457892	1.12326e-07	0.0457395	0.480992	0	0	overlap
ENSG00000066032	cg13391675	0.472934	3.81422e-08	0.0155317	0.472118	0	0	overlap
ENSG00000066032	cg15831228	0.456731	1.21825e-07	0.0496076	0.418823	2.88181e-12	1.17348e-06	overlap
ENSG00000066032	cg21349914	0.462181	8.30083e-08	0.0338013	0.451478	0	0	overlap
ENSG00000115423	cg04361556	0.474925	3.29212e-08	0.0134057	0.579903	0	0	overlap
ENSG00000034510	cg15034300	-0.473997	3.52637e-08	0.0143595	-0.292961	1.87594e-06	0.763889	fSpecific
ENSG00000152284	cg04062717	0.487687	1.24659e-08	0.00507616	0.55657	0	0	overlap
ENSG00000152284	cg14279650	0.578538	0	0	0.625736	0	0	overlap
ENSG00000152284	cg00156118	0.490648	9.87436e-09	0.00402088	0.587611	0	0	overlap
ENSG00000152284	cg22128724	-0.472719	3.87512e-08	0.0157796	-0.39056	1.10783e-10	4.51114e-05	overlap
ENSG00000118640	cg05656364	-0.481014	2.08426e-08	0.0084872	-0.411311	8.19562e-12	3.33729e-06	overlap
ENSG00000118640	cg08379897	-0.539803	3.97837e-11	1.62001e-05	-0.44813	0	0	overlap
ENSG00000068615	cg06060731	0.458851	1.05022e-07	0.0427653	0.280062	5.37611e-06	1	fSpecific
ENSG00000163586	cg14405300	-0.659392	0	0	-0.569017	0	0	overlap
ENSG00000144115	cg04511125	-0.6967	0	0	-0.65461	0	0	overlap
ENSG00000144115	cg07952391	-0.460031	9.66533e-08	0.0393576	-0.452262	0	0	overlap
ENSG00000144115	cg24977027	-0.514126	1.32912e-09	0.000541223	-0.435358	1.61772e-13	6.5874e-08	overlap
ENSG00000115041	cg04001714	0.521585	6.34166e-10	0.000258235	0.625807	0	0	overlap
ENSG00000115041	cg16178141	0.620916	0	0	0.607674	0	0	overlap
ENSG00000196872	cg08517455	-0.458452	1.08008e-07	0.0439814	-0.124364	0.0460264	1	fSpecific
ENSG00000144214	cg09518151	0.4633	7.66598e-08	0.0312162	0.222907	0.000318111	1	fSpecific
ENSG00000144218	cg14552010	0.510169	1.91434e-09	0.000779528	0.58436	0	0	overlap
ENSG00000170500	cg12232463	0.502022	3.89766e-09	0.00158714	0.561125	0	0	overlap
ENSG00000115526	cg18845236	0.462341	8.20716e-08	0.0334199	0.635593	0	0	overlap
ENSG00000115526	cg18406852	0.508301	2.26293e-09	0.000921475	0.620351	0	0	overlap
ENSG00000115526	cg19283506	-0.479054	2.41749e-08	0.00984413	-0.507255	0	0	overlap
ENSG00000115598	cg08023416	-0.681223	0	0	-0.618196	0	0	overlap
ENSG00000115598	cg13315345	-0.627496	0	0	-0.545825	0	0	overlap
ENSG00000115598	cg15077070	-0.689831	0	0	-0.644936	0	0	overlap
ENSG00000115598	cg14837955	-0.718691	0	0	-0.703797	0	0	overlap
ENSG00000115598	cg01376829	-0.594476	0	0	-0.510013	0	0	overlap
ENSG00000115598	cg00674896	-0.619705	0	0	-0.556192	0	0	overlap
ENSG00000115598	cg22797169	-0.758034	0	0	-0.759721	0	0	overlap
ENSG00000115604	cg20629735	0.56314	0	0	0.548885	0	0	overlap
ENSG00000115604	cg23450938	-0.486409	1.37713e-08	0.00560774	-0.495924	0	0	overlap
ENSG00000071051	cg13704531	0.583889	0	0	0.53764	0	0	overlap
ENSG00000071051	cg11752152	0.498796	5.1056e-09	0.00207902	0.378001	4.73235e-10	0.000192703	overlap
ENSG00000071051	cg19828970	0.508608	2.20195e-09	0.000896642	0.594085	0	0	overlap
ENSG00000071051	cg21101995	0.512086	1.60725e-09	0.000654477	0.430962	4.04881e-13	1.64869e-07	overlap
ENSG00000071051	cg20703928	0.492043	8.83774e-09	0.00359876	0.370994	1.03195e-09	0.000420214	overlap
ENSG00000071051	cg18709306	0.477229	2.77265e-08	0.0112904	0.478847	0	0	overlap
ENSG00000071051	cg01295249	0.473462	3.66845e-08	0.0149381	0.421916	1.8235e-12	7.42536e-07	overlap
ENSG00000071051	cg01051524	0.518906	8.35192e-10	0.000340093	0.390142	1.16421e-10	4.74069e-05	overlap
ENSG00000071051	cg22765178	0.510906	1.79055e-09	0.000729118	0.507094	0	0	overlap
ENSG00000071051	cg25961567	0.559908	0	0	0.522554	0	0	overlap
ENSG00000198075	cg10236239	-0.617911	0	0	-0.486585	0	0	overlap
ENSG00000172985	cg07258149	0.492068	8.82042e-09	0.00359171	0.595763	0	0	overlap
ENSG00000172985	cg10363926	0.476006	3.03776e-08	0.0123699	0.598066	0	0	overlap
ENSG00000172985	cg17297613	0.553677	0	0	0.545222	0	0	overlap
ENSG00000172985	cg19700035	0.531588	1.91868e-10	7.81294e-05	0.549711	0	0	overlap
ENSG00000172985	cg18429723	0.511367	1.71685e-09	0.000699107	0.44563	0	0	overlap
ENSG00000172985	cg19024599	0.500393	4.46981e-09	0.00182012	0.522145	0	0	overlap
ENSG00000172985	cg27119815	0.461555	8.67824e-08	0.0353381	0.574434	0	0	overlap
ENSG00000153094	cg04780086	0.488332	1.1852e-08	0.0048262	0.284349	3.80978e-06	1	fSpecific
ENSG00000144152	cg23946548	0.54577	0	0	0.408794	1.14502e-11	4.66257e-06	overlap
ENSG00000136689	cg02377053	-0.637843	0	0	-0.565529	0	0	overlap
ENSG00000125618	cg07594247	-0.62926	0	0	-0.635829	0	0	overlap
ENSG00000125618	cg07772999	-0.638163	0	0	-0.617369	0	0	overlap
ENSG00000125618	cg11763394	-0.633972	0	0	-0.591504	0	0	overlap
ENSG00000125618	cg12889195	-0.639189	0	0	-0.643666	0	0	overlap
ENSG00000125618	cg17445212	-0.625671	0	0	-0.638299	0	0	overlap
ENSG00000125618	cg19083407	-0.602243	0	0	-0.611846	0	0	overlap
ENSG00000125618	cg21610815	-0.610194	0	0	-0.613565	0	0	overlap
ENSG00000125618	cg21550016	-0.64153	0	0	-0.619365	0	0	overlap
ENSG00000125618	cg21482265	-0.610931	0	0	-0.618111	0	0	overlap
ENSG00000175497	cg18580232	0.49377	7.69561e-09	0.00313368	0.271793	1.0285e-05	1	fSpecific
ENSG00000115107	cg00590251	-0.462316	8.22151e-08	0.0334783	-0.556329	0	0	overlap
ENSG00000171227	cg25079915	-0.537696	6.76281e-11	2.75384e-05	-0.430671	4.27499e-13	1.74079e-07	overlap
ENSG00000163075	cg02629106	-0.499121	4.96958e-09	0.00202363	-0.358068	4.13344e-09	0.00168315	overlap
ENSG00000163075	cg13833596	-0.644	0	0	-0.430612	4.32244e-13	1.76011e-07	overlap
ENSG00000163083	cg03175975	-0.517536	9.57166e-10	0.000389762	-0.34187	2.1593e-08	0.00879274	overlap
ENSG00000115112	cg09558000	0.482925	1.80163e-08	0.00733632	0.33567	3.96974e-08	0.016165	overlap
ENSG00000115112	cg00579706	0.562808	0	0	0.287106	3.04418e-06	1	fSpecific
ENSG00000072163	cg11115063	0.463859	7.36619e-08	0.0299954	0.306575	5.84317e-07	0.237936	fSpecific
ENSG00000136731	cg11705747	-0.468369	5.32488e-08	0.0216831	-0.472238	0	0	overlap
ENSG00000136720	cg02886528	-0.477008	2.81892e-08	0.0114788	-0.482265	0	0	overlap
ENSG00000136720	cg10012530	-0.571422	0	0	-0.602837	0	0	overlap
ENSG00000136720	cg11416620	-0.463883	7.35327e-08	0.0299428	-0.492238	0	0	overlap
ENSG00000136002	cg01382688	0.488012	1.21524e-08	0.0049485	0.392529	8.76021e-11	3.56719e-05	overlap
ENSG00000136002	cg26264896	0.55565	0	0	0.408043	1.26362e-11	5.14551e-06	overlap
ENSG00000176771	cg05012457	0.560123	0	0	0.477369	0	0	overlap
ENSG00000176771	cg03671556	0.620326	0	0	0.512567	0	0	overlap
ENSG00000176771	cg14354676	0.537469	7.10172e-11	2.89185e-05	0.46675	0	0	overlap
ENSG00000176771	cg13066289	0.601518	0	0	0.568868	0	0	overlap
ENSG00000176771	cg16328548	0.533555	1.43478e-10	5.8425e-05	0.535689	0	0	overlap
ENSG00000176771	cg17748861	0.642163	0	0	0.604795	0	0	overlap
ENSG00000176771	cg19414227	0.543441	4.53056e-12	1.84486e-06	0.482869	0	0	overlap
ENSG00000176771	cg01290856	-0.488657	1.15531e-08	0.00470448	-0.501943	0	0	overlap
ENSG00000176771	cg01344813	0.64161	0	0	0.501974	0	0	overlap
ENSG00000176771	cg02069095	0.46714	5.82002e-08	0.0236994	0.453826	0	0	overlap
ENSG00000176771	cg00524899	0.651693	0	0	0.488779	0	0	overlap
ENSG00000176771	cg00053063	0.539674	4.13146e-11	1.68235e-05	0.505254	0	0	overlap
ENSG00000176771	cg00113096	0.54526	0	0	0.598245	0	0	overlap
ENSG00000176771	cg23273316	0.472565	3.91917e-08	0.015959	0.60961	0	0	overlap
ENSG00000176771	cg23072408	0.495238	6.83434e-09	0.00278297	0.490289	0	0	overlap
ENSG00000176771	cg21400296	0.610943	0	0	0.517754	0	0	overlap
ENSG00000168702	cg04528116	0.487539	1.26103e-08	0.00513498	0.581708	0	0	overlap
ENSG00000168702	cg03252605	0.630022	0	0	0.618041	0	0	overlap
ENSG00000168702	cg06382546	0.579367	0	0	0.570848	0	0	overlap
ENSG00000168702	cg10499042	0.534814	1.17002e-10	4.76437e-05	0.445651	0	0	overlap
ENSG00000168702	cg11703179	0.474562	3.38183e-08	0.013771	0.479341	0	0	overlap
ENSG00000168702	cg16671674	0.484172	1.63715e-08	0.00666652	0.494794	0	0	overlap
ENSG00000168702	cg21340845	0.701905	0	0	0.675124	0	0	overlap
ENSG00000168702	cg24878483	0.513364	1.42759e-09	0.000581322	0.451547	0	0	overlap
ENSG00000121964	cg12311936	0.463926	7.33072e-08	0.029851	0.430318	4.56374e-13	1.85837e-07	overlap
ENSG00000121964	cg24857725	0.502759	3.66143e-09	0.00149095	0.431618	3.57329e-13	1.45506e-07	overlap
ENSG00000187123	cg05095252	0.603312	0	0	0.614258	0	0	overlap
ENSG00000157827	cg04215359	0.465481	6.55842e-08	0.0267062	0.550298	0	0	overlap
ENSG00000157827	cg02904628	0.459392	1.01104e-07	0.0411699	0.508311	0	0	overlap
ENSG00000157827	cg06899009	0.485131	1.5205e-08	0.00619152	0.621102	0	0	overlap
ENSG00000157827	cg05696136	0.520197	7.32604e-10	0.000298319	0.653497	0	0	overlap
ENSG00000157827	cg11172396	0.548492	0	0	0.619267	0	0	overlap
ENSG00000157827	cg15705810	0.478095	2.59828e-08	0.0105803	0.564911	0	0	overlap
ENSG00000157827	cg26676845	0.505419	2.91383e-09	0.00118652	0.626258	0	0	overlap
ENSG00000157827	cg26207245	0.537094	7.67817e-11	3.12658e-05	0.662437	0	0	overlap
ENSG00000157827	cg27617780	0.50188	3.9445e-09	0.00160622	0.593217	0	0	overlap
ENSG00000157827	cg25880810	0.495238	6.83434e-09	0.00278297	0.623614	0	0	overlap
ENSG00000162989	cg03861217	0.460006	9.6821e-08	0.0394259	0.687873	0	0	overlap
ENSG00000162989	cg03601797	-0.576725	0	0	-0.394633	6.80097e-11	2.76938e-05	overlap
ENSG00000162989	cg17300051	-0.473524	3.65184e-08	0.0148704	-0.331405	5.98985e-08	0.0243909	overlap
ENSG00000162989	cg01231108	-0.496307	6.26481e-09	0.00255105	-0.283548	4.06459e-06	1	fSpecific
ENSG00000136536	cg19391384	-0.460946	9.06015e-08	0.0368933	-0.234539	0.000149442	1	fSpecific
ENSG00000153250	cg20385461	0.475441	3.1683e-08	0.0129014	0.436345	1.26912e-13	5.1679e-08	overlap
ENSG00000153250	cg00335252	0.456811	1.21148e-07	0.0493319	0.464147	0	0	overlap
ENSG00000115290	cg23178364	-0.548959	0	0	-0.356445	4.89869e-09	0.00199477	overlap
ENSG00000169432	cg07296661	0.498906	5.05902e-09	0.00206005	0.266373	1.55631e-05	1	fSpecific
ENSG00000198648	cg03372410	0.546065	0	0	0.565482	0	0	overlap
ENSG00000198648	cg07903472	0.518906	8.35192e-10	0.000340093	0.593789	0	0	overlap
ENSG00000198648	cg06067477	0.544074	0	0	0.659099	0	0	overlap
ENSG00000081479	cg07069090	0.48161	1.99189e-08	0.00811107	0.448149	0	0	overlap
ENSG00000081479	cg23238677	0.650568	0	0	0.629849	0	0	overlap
ENSG00000163093	cg10536369	-0.508959	2.13423e-09	0.000869068	-0.592114	0	0	overlap
ENSG00000213160	cg21995961	-0.469235	5.00022e-08	0.0203611	-0.473285	0	0	overlap
ENSG00000115840	cg04337734	0.529849	2.42901e-10	9.89102e-05	0.567314	0	0	overlap
ENSG00000115840	cg00040027	0.468786	5.16588e-08	0.0210357	0.418486	3.02564e-12	1.23205e-06	overlap
ENSG00000172878	cg03398383	0.470163	4.67347e-08	0.0190305	0.351423	8.23587e-09	0.00335368	overlap
ENSG00000175879	cg09173768	0.461266	8.85759e-08	0.0360685	0.166623	0.00737379	1	fSpecific
ENSG00000128652	cg07930539	0.459355	1.01366e-07	0.0412768	0.0957061	0.125142	1	fSpecific
ENSG00000128652	cg18944451	0.527859	3.12436e-10	0.000127225	0.331197	6.11044e-08	0.0248819	overlap
ENSG00000128652	cg01152019	0.49973	4.72445e-09	0.00192382	0.106557	0.0876135	1	fSpecific
ENSG00000128652	cg01128482	0.498863	5.07709e-09	0.00206741	0.280778	5.0775e-06	1	fSpecific
ENSG00000128652	cg23981871	0.463539	7.5361e-08	0.0306873	0.322695	1.36219e-07	0.0554688	fSpecific
ENSG00000128652	cg22344631	0.49235	8.62355e-09	0.00351155	0.266874	1.49838e-05	1	fSpecific
ENSG00000170166	cg02857760	0.477653	2.68598e-08	0.0109374	0.401007	3.10597e-11	1.26477e-05	overlap
ENSG00000170166	cg06390651	0.466323	6.17325e-08	0.0251377	0.206862	0.00084873	1	fSpecific
ENSG00000170166	cg09601175	0.461843	8.50234e-08	0.0346219	0.260091	2.48854e-05	1	fSpecific
ENSG00000170166	cg18944451	0.530341	2.27619e-10	9.26874e-05	0.355921	5.17378e-09	0.00210679	overlap
ENSG00000170166	cg01152019	0.553524	0	0	0.283708	4.01263e-06	1	fSpecific
ENSG00000170166	cg01871127	0.508375	2.24816e-09	0.000915459	0.294592	1.63613e-06	0.666239	fSpecific
ENSG00000170166	cg23676302	0.501481	4.07971e-09	0.00166127	0.292185	2.00139e-06	0.814973	fSpecific
ENSG00000170166	cg22344631	0.507816	2.36239e-09	0.000961976	0.402649	2.52681e-11	1.02893e-05	overlap
ENSG00000170166	cg26821745	0.469247	4.99575e-08	0.0203429	0.341796	2.17523e-08	0.00885761	overlap
ENSG00000170166	cg25942990	0.463711	7.44415e-08	0.0303129	0.17384	0.00515989	1	fSpecific
ENSG00000079156	cg07565551	0.559668	0	0	0.50272	0	0	overlap
ENSG00000079156	cg01420564	0.538544	5.56737e-11	2.26706e-05	0.569248	0	0	overlap
ENSG00000079156	cg00829858	0.53074	2.15711e-10	8.78382e-05	0.417866	3.30761e-12	1.34687e-06	overlap
ENSG00000079156	cg23945081	0.514538	1.27843e-09	0.000520581	0.544812	0	0	overlap
ENSG00000079156	cg21627775	0.496307	6.26481e-09	0.00255105	0.383798	2.44342e-10	9.9497e-05	overlap
ENSG00000155657	cg10939966	0.505161	2.9797e-09	0.00121334	0.54313	0	0	overlap
ENSG00000150722	cg15735129	0.471834	4.13551e-08	0.01684	0.465121	0	0	overlap
ENSG00000150722	cg19742470	0.626519	0	0	0.514992	0	0	overlap
ENSG00000144366	cg04546573	0.480111	2.23201e-08	0.00908885	0.547361	0	0	overlap
ENSG00000144366	cg07791987	0.58121	0	0	0.579384	0	0	overlap
ENSG00000144366	cg05256276	0.549161	0	0	0.454542	0	0	overlap
ENSG00000187699	cg04391205	-0.528227	2.98579e-10	0.000121583	-0.509737	0	0	overlap
ENSG00000187699	cg05969591	-0.46682	5.95577e-08	0.0242521	-0.472533	0	0	overlap
ENSG00000187699	cg10168635	-0.499521	4.80735e-09	0.00195757	-0.301039	9.45464e-07	0.384997	fSpecific
ENSG00000151689	cg25753817	-0.532535	1.67437e-10	6.81808e-05	-0.505563	0	0	overlap
ENSG00000115415	cg14951497	-0.504817	3.06963e-09	0.00124997	-0.59445	0	0	overlap
ENSG00000115415	cg00676801	-0.524123	4.82247e-10	0.000196373	-0.568062	0	0	overlap
ENSG00000196950	cg25521338	0.5022	3.83932e-09	0.00156339	0.421816	1.85126e-12	7.5384e-07	overlap
ENSG00000118997	cg05879419	0.483883	1.67391e-08	0.00681625	0.218728	0.000413518	1	fSpecific
ENSG00000119042	cg27627246	0.506083	2.7505e-09	0.00112001	0.471941	0	0	overlap
ENSG00000196141	cg08866865	-0.528768	2.79086e-10	0.000113645	-0.474915	0	0	overlap
ENSG00000116117	cg25149218	-0.671029	0	0	-0.603348	0	0	overlap
ENSG00000114948	cg23369107	0.457616	1.14521e-07	0.0466335	0.468333	0	0	overlap
ENSG00000144410	cg03731898	0.497241	5.80376e-09	0.00236331	0.623242	0	0	overlap
ENSG00000118263	cg03003394	0.622181	0	0	0.612123	0	0	overlap
ENSG00000118263	cg03484267	0.504916	3.04369e-09	0.0012394	0.609286	0	0	overlap
ENSG00000118263	cg05861291	0.459459	1.00624e-07	0.0409745	0.539616	0	0	overlap
ENSG00000118263	cg10278149	0.470845	4.44635e-08	0.0181057	0.539862	0	0	overlap
ENSG00000118263	cg20374118	0.551515	0	0	0.61341	0	0	overlap
ENSG00000118263	cg21294960	0.5538	0	0	0.645543	0	0	overlap
ENSG00000118263	cg26879736	0.527939	3.09394e-10	0.000125986	0.545391	0	0	overlap
ENSG00000163251	cg01383128	-0.473727	3.59756e-08	0.0146494	-0.380855	3.42413e-10	0.000139432	overlap
ENSG00000144407	cg02961397	0.522433	5.79617e-10	0.000236023	0.643836	0	0	overlap
ENSG00000144407	cg10330056	0.595533	0	0	0.667903	0	0	overlap
ENSG00000144407	cg10780981	-0.480602	2.15042e-08	0.00875658	-0.604009	0	0	overlap
ENSG00000144407	cg10650753	0.558888	0	0	0.662917	0	0	overlap
ENSG00000144407	cg08623091	-0.526802	3.54838e-10	0.000144491	-0.653432	0	0	overlap
ENSG00000144407	cg18559579	-0.598366	0	0	-0.821668	0	0	overlap
ENSG00000144407	cg02296171	-0.607988	0	0	-0.806266	0	0	overlap
ENSG00000144407	cg00281776	-0.628694	0	0	-0.843689	0	0	overlap
ENSG00000144407	cg25252708	0.525149	4.29818e-10	0.000175023	0.760655	0	0	overlap
ENSG00000078018	cg07605229	0.567853	0	0	0.662578	0	0	overlap
ENSG00000078018	cg09961177	0.646857	0	0	0.709661	0	0	overlap
ENSG00000078018	cg14010448	0.654783	0	0	0.710803	0	0	overlap
ENSG00000078018	cg01218350	0.644332	0	0	0.684436	0	0	overlap
ENSG00000078018	cg00135874	0.476602	2.90566e-08	0.011832	0.597965	0	0	overlap
ENSG00000078018	cg27662832	0.520381	7.1885e-10	0.000292719	0.529623	0	0	overlap
ENSG00000021826	cg11926456	-0.497352	5.7513e-09	0.00234195	-0.482118	0	0	overlap
ENSG00000030419	cg16345559	0.513419	1.42024e-09	0.000578327	0.518679	0	0	overlap
ENSG00000144451	cg07965640	-0.490292	1.0157e-08	0.00413595	-0.476225	0	0	overlap
ENSG00000127831	cg04218124	-0.753677	0	0	-0.718883	0	0	overlap
ENSG00000127831	cg18970338	-0.489677	1.06621e-08	0.00434165	-0.539643	0	0	overlap
ENSG00000163501	cg13156014	0.536313	8.95191e-11	3.64525e-05	0.383851	2.4285e-10	9.88894e-05	overlap
ENSG00000163521	cg09715285	-0.567318	0	0	-0.603039	0	0	overlap
ENSG00000163521	cg20314884	-0.552707	0	0	-0.585743	0	0	overlap
ENSG00000127824	cg11348442	-0.557788	0	0	-0.606187	0	0	overlap
ENSG00000127824	cg08640923	-0.58918	0	0	-0.575346	0	0	overlap
ENSG00000127824	cg08378442	-0.596381	0	0	-0.597534	0	0	overlap
ENSG00000127824	cg08396863	-0.591582	0	0	-0.614797	0	0	overlap
ENSG00000127824	cg16725050	-0.580928	0	0	-0.608178	0	0	overlap
ENSG00000127824	cg19074496	-0.613419	0	0	-0.587313	0	0	overlap
ENSG00000127824	cg23108728	-0.531084	2.05804e-10	8.38043e-05	-0.521527	0	0	overlap
ENSG00000188760	cg03830936	0.459576	9.98004e-08	0.0406391	0.432999	2.71555e-13	1.10578e-07	overlap
ENSG00000188760	cg02629976	0.477905	2.6357e-08	0.0107327	0.479603	0	0	overlap
ENSG00000124006	cg04447708	0.539263	4.63435e-11	1.88713e-05	0.610657	0	0	overlap
ENSG00000124006	cg04414095	0.516528	1.05629e-09	0.000430127	0.583308	0	0	overlap
ENSG00000124006	cg03046424	0.679496	0	0	0.648801	0	0	overlap
ENSG00000124006	cg03005124	0.501444	4.0924e-09	0.00166644	0.586777	0	0	overlap
ENSG00000124006	cg03261633	0.469604	4.86786e-08	0.0198221	0.538058	0	0	overlap
ENSG00000124006	cg07673376	0.532018	1.80488e-10	7.34955e-05	0.65496	0	0	overlap
ENSG00000124006	cg10091487	0.590593	0	0	0.552885	0	0	overlap
ENSG00000124006	cg08294017	0.533634	1.417e-10	5.7701e-05	0.55882	0	0	overlap
ENSG00000124006	cg09457121	0.614329	0	0	0.662173	0	0	overlap
ENSG00000124006	cg09310186	0.607889	0	0	0.53132	0	0	overlap
ENSG00000124006	cg14281087	0.550323	0	0	0.408311	1.21998e-11	4.96782e-06	overlap
ENSG00000124006	cg13000039	0.601352	0	0	0.651541	0	0	overlap
ENSG00000124006	cg16909579	0.645794	0	0	0.681379	0	0	overlap
ENSG00000124006	cg15768886	0.472289	3.99968e-08	0.0162869	0.488445	0	0	overlap
ENSG00000124006	cg00389406	0.490531	9.96611e-09	0.00405824	0.526138	0	0	overlap
ENSG00000124006	cg00452266	0.617081	0	0	0.640668	0	0	overlap
ENSG00000124006	cg23977011	0.516369	1.07279e-09	0.000436845	0.35672	4.75989e-09	0.00193825	overlap
ENSG00000124006	cg24412960	0.640356	0	0	0.690955	0	0	overlap
ENSG00000124006	cg21404700	0.466077	6.28342e-08	0.0255864	0.441191	2.03909e-14	8.30324e-09	overlap
ENSG00000124006	cg25492803	0.589929	0	0	0.660236	0	0	overlap
ENSG00000123999	cg10091487	0.48988	1.04929e-08	0.00427273	0.296873	1.34956e-06	0.549546	fSpecific
ENSG00000123999	cg00452266	0.508946	2.13658e-09	0.000870023	0.33928	2.7892e-08	0.0113577	overlap
ENSG00000163082	cg23840083	0.477026	2.81504e-08	0.011463	0.298274	1.19806e-06	0.487854	fSpecific
ENSG00000123983	cg07604043	-0.50443	3.17376e-09	0.00129237	-0.546299	0	0	overlap
ENSG00000123983	cg14157824	-0.50749	2.43131e-09	0.00099004	-0.471274	0	0	overlap
ENSG00000123983	cg22909085	-0.506101	2.74608e-09	0.00111821	-0.407079	1.4328e-11	5.8344e-06	overlap
ENSG00000153823	cg20557688	-0.534876	1.15793e-10	4.71513e-05	-0.558029	0	0	overlap
ENSG00000163053	cg01172899	-0.502685	3.68445e-09	0.00150032	-0.535161	0	0	overlap
ENSG00000185404	cg24044052	-0.562894	0	0	-0.542651	0	0	overlap
ENSG00000135916	cg14396306	0.629604	0	0	0.640678	0	0	overlap
ENSG00000135916	cg17674726	0.701702	0	0	0.692684	0	0	overlap
ENSG00000135916	cg14649507	0.581401	0	0	0.670487	0	0	overlap
ENSG00000135916	cg20020161	0.549499	0	0	0.564688	0	0	overlap
ENSG00000135916	cg18665334	0.526433	3.7061e-10	0.000150914	0.670326	0	0	overlap
ENSG00000135916	cg19455189	0.603465	0	0	0.690452	0	0	overlap
ENSG00000135931	cg14044375	0.47863	2.49593e-08	0.0101635	0.580744	0	0	overlap
ENSG00000135931	cg18091762	-0.520774	6.90227e-10	0.000281063	-0.489459	0	0	overlap
ENSG00000163295	cg22094845	0.469868	4.77506e-08	0.0194442	0.209431	0.000728728	1	fSpecific
ENSG00000182600	cg17048169	-0.466273	6.19514e-08	0.0252269	-0.386335	1.8209e-10	7.41478e-05	overlap
ENSG00000241119	cg14121772	-0.538224	6.0054e-11	2.44542e-05	-0.585359	0	0	overlap
ENSG00000241119	cg12385643	-0.591742	0	0	-0.608949	0	0	overlap
ENSG00000241119	cg15559700	-0.47149	4.2412e-08	0.0172704	-0.405395	1.78106e-11	7.25255e-06	overlap
ENSG00000241119	cg19409149	-0.526654	3.61084e-10	0.000147035	-0.513642	0	0	overlap
ENSG00000241119	cg23338993	-0.572805	0	0	-0.610959	0	0	overlap
ENSG00000241119	cg23927405	-0.602796	0	0	-0.421823	1.84931e-12	7.53045e-07	overlap
ENSG00000244122	cg14121772	-0.479871	2.27285e-08	0.00925513	-0.44887	0	0	overlap
ENSG00000244122	cg12385643	-0.551816	0	0	-0.479072	0	0	overlap
ENSG00000244122	cg19409149	-0.494587	7.20457e-09	0.00293373	-0.372499	8.74303e-10	0.00035602	overlap
ENSG00000244122	cg23338993	-0.501124	4.20394e-09	0.00171186	-0.460315	0	0	overlap
ENSG00000244122	cg23927405	-0.564246	0	0	-0.380604	3.52369e-10	0.000143486	overlap
ENSG00000167165	cg12385643	-0.499011	5.0154e-09	0.00204229	-0.536864	0	0	overlap
ENSG00000167165	cg19409149	-0.49122	9.43659e-09	0.00384262	-0.547032	0	0	overlap
ENSG00000240224	cg25796050	-0.479674	2.30688e-08	0.00939371	-0.61693	0	0	overlap
ENSG00000244474	cg19146119	-0.466101	6.27232e-08	0.0255412	-0.545181	0	0	overlap
ENSG00000241635	cg07823755	-0.520522	7.08452e-10	0.000288485	-0.476511	0	0	overlap
ENSG00000241635	cg11811840	-0.550575	0	0	-0.543163	0	0	overlap
ENSG00000241635	cg21620495	-0.473045	3.78326e-08	0.0154056	-0.323887	1.21917e-07	0.049645	overlap
ENSG00000144476	cg25295825	0.537561	6.96336e-11	2.83551e-05	0.431003	4.01752e-13	1.63595e-07	overlap
ENSG00000115648	cg16426459	-0.461309	8.83066e-08	0.0359588	-0.295827	1.47446e-06	0.600405	fSpecific
ENSG00000115648	cg21750428	0.589321	0	0	0.507986	0	0	overlap
ENSG00000124839	cg06353069	-0.489094	1.11638e-08	0.00454594	-0.300992	9.49337e-07	0.386574	fSpecific
ENSG00000132329	cg04365102	-0.62604	0	0	-0.460603	0	0	overlap
ENSG00000132329	cg03647559	-0.502101	3.87141e-09	0.00157645	-0.545441	0	0	overlap
ENSG00000132329	cg03270167	-0.549591	0	0	-0.423828	1.35902e-12	5.53398e-07	overlap
ENSG00000132329	cg09861583	-0.632829	0	0	-0.536791	0	0	overlap
ENSG00000132329	cg17845266	-0.641806	0	0	-0.470509	0	0	overlap
ENSG00000132329	cg14849262	-0.540326	3.38018e-11	1.37642e-05	-0.514642	0	0	overlap
ENSG00000132329	cg20986875	-0.499945	4.6405e-09	0.00188963	-0.410399	9.25837e-12	3.77005e-06	overlap
ENSG00000132329	cg27418586	-0.477413	2.73465e-08	0.0111356	-0.323601	1.25201e-07	0.0509825	fSpecific
ENSG00000132330	cg18068683	-0.458544	1.07312e-07	0.0436978	-0.35927	3.64244e-09	0.00148321	overlap
ENSG00000144488	cg03558837	0.510488	1.85979e-09	0.000757314	0.393559	7.74127e-11	3.15228e-05	overlap
ENSG00000168427	cg17263013	-0.463797	7.39858e-08	0.0301273	-0.178235	0.00412491	1	fSpecific
ENSG00000063660	cg03438674	0.503005	3.58566e-09	0.00146009	0.359668	3.49288e-09	0.00142232	overlap
ENSG00000063660	cg06900899	0.540172	3.5526e-11	1.44663e-05	0.380799	3.44629e-10	0.000140334	overlap
ENSG00000063660	cg05530403	0.56722	0	0	0.338164	3.1122e-08	0.012673	overlap
ENSG00000063660	cg06591185	0.539982	3.77046e-11	1.53534e-05	0.479309	0	0	overlap
ENSG00000063660	cg08347226	0.53828	5.92853e-11	2.41412e-05	0.431267	3.82214e-13	1.55639e-07	overlap
ENSG00000063660	cg13717562	0.580387	0	0	0.403846	2.17094e-11	8.84014e-06	overlap
ENSG00000063660	cg13232118	0.657837	0	0	0.568303	0	0	overlap
ENSG00000063660	cg13414834	0.502611	3.7076e-09	0.00150975	0.499871	0	0	overlap
ENSG00000063660	cg13393505	0.539134	4.7966e-11	1.9532e-05	0.406717	1.50171e-11	6.11503e-06	overlap
ENSG00000063660	cg11574092	0.622169	0	0	0.436616	1.18291e-13	4.81684e-08	overlap
ENSG00000063660	cg11479811	0.482046	1.92676e-08	0.00784583	0.375824	6.04239e-10	0.000246049	overlap
ENSG00000063660	cg17498717	0.470335	4.61515e-08	0.0187931	0.235687	0.00013843	1	fSpecific
ENSG00000063660	cg17367832	0.469382	4.94687e-08	0.0201438	0.417082	3.69879e-12	1.50616e-06	overlap
ENSG00000063660	cg15144453	0.597493	0	0	0.548232	0	0	overlap
ENSG00000063660	cg14805932	0.510267	1.89741e-09	0.000772631	0.375642	6.16635e-10	0.000251096	overlap
ENSG00000063660	cg15700022	0.630998	0	0	0.546932	0	0	overlap
ENSG00000063660	cg20094506	0.464442	7.06517e-08	0.0287696	0.137744	0.0270153	1	fSpecific
ENSG00000063660	cg18582965	0.51973	7.68433e-10	0.000312909	0.279658	5.5515e-06	1	fSpecific
ENSG00000063660	cg18455650	0.476172	3.00043e-08	0.0122179	0.389926	1.19436e-10	4.86347e-05	overlap
ENSG00000063660	cg01533409	0.496412	6.2116e-09	0.00252939	0.386885	1.70759e-10	6.95339e-05	overlap
ENSG00000063660	cg01712737	0.620989	0	0	0.436487	1.22352e-13	4.98224e-08	overlap
ENSG00000063660	cg01380104	0.530857	2.12313e-10	8.64549e-05	0.518994	0	0	overlap
ENSG00000063660	cg00441027	0.569862	0	0	0.408437	1.19991e-11	4.88609e-06	overlap
ENSG00000063660	cg22515987	0.493167	8.07724e-09	0.00328909	0.376141	5.83215e-10	0.000237488	overlap
ENSG00000063660	cg26128123	0.551889	0	0	0.521759	0	0	overlap
ENSG00000063660	cg25821995	0.528559	2.86503e-10	0.000116665	0.437961	8.09139e-14	3.29485e-08	overlap
ENSG00000178623	cg10173787	0.486114	1.40904e-08	0.00573766	0.351968	7.78716e-09	0.00317096	overlap
ENSG00000178623	cg13097816	0.605481	0	0	0.351344	8.30223e-09	0.0033807	overlap
ENSG00000178623	cg21151122	0.526814	3.54321e-10	0.000144281	0.44732	0	0	overlap
ENSG00000178623	cg19282928	0.4567	1.22086e-07	0.0497141	0.375694	6.13082e-10	0.00024965	overlap
ENSG00000178623	cg22079149	0.574482	0	0	0.465148	0	0	overlap
ENSG00000172482	cg16358738	-0.593567	0	0	-0.603997	0	0	overlap
ENSG00000172478	cg04733744	-0.650316	0	0	-0.588331	0	0	overlap
ENSG00000172478	cg09990169	-0.663066	0	0	-0.585907	0	0	overlap
ENSG00000172478	cg08694578	-0.706445	0	0	-0.712373	0	0	overlap
ENSG00000172478	cg16171392	-0.488436	1.17554e-08	0.00478684	-0.278268	6.19914e-06	1	fSpecific
ENSG00000172478	cg20140201	-0.736707	0	0	-0.712374	0	0	overlap
ENSG00000226321	cg02699194	-0.519717	7.69396e-10	0.000313301	-0.235691	0.000138391	1	fSpecific
ENSG00000226321	cg13537237	-0.542513	1.219e-11	4.96381e-06	-0.481004	0	0	overlap
ENSG00000226321	cg14059464	-0.513849	1.36415e-09	0.000555485	-0.288335	2.75237e-06	1	fSpecific
ENSG00000226321	cg16937168	-0.48781	1.23467e-08	0.00502763	-0.385898	1.91589e-10	7.80159e-05	overlap
ENSG00000226321	cg14684854	-0.575582	0	0	-0.368005	1.43051e-09	0.000582509	overlap
ENSG00000226321	cg01203136	0.535607	1.01958e-10	4.15175e-05	0.579859	0	0	overlap
ENSG00000226321	cg21304158	-0.503263	3.50764e-09	0.00142833	-0.346518	1.35625e-08	0.00552271	overlap
ENSG00000176946	cg20927307	-0.508393	2.24448e-09	0.000913961	-0.240908	9.72607e-05	1	fSpecific
ENSG00000154252	cg06402816	0.506187	2.72556e-09	0.00110986	0.308777	4.81254e-07	0.195969	fSpecific
ENSG00000154252	cg10504150	-0.591705	0	0	-0.562432	0	0	overlap
ENSG00000154252	cg16660312	-0.573868	0	0	-0.519073	0	0	overlap
ENSG00000154252	cg15346191	0.474931	3.29062e-08	0.0133996	0.299524	1.07681e-06	0.438481	fSpecific
ENSG00000154252	cg20791593	-0.486341	1.38438e-08	0.00563727	-0.432203	3.18764e-13	1.29802e-07	overlap
ENSG00000154252	cg18095041	-0.533327	1.48615e-10	6.05166e-05	-0.566649	0	0	overlap
ENSG00000154252	cg24429037	-0.56623	0	0	-0.569375	0	0	overlap
ENSG00000204099	cg10504150	-0.724031	0	0	-0.738358	0	0	overlap
ENSG00000204099	cg11706790	-0.644436	0	0	-0.570203	0	0	overlap
ENSG00000204099	cg16660312	-0.78228	0	0	-0.754297	0	0	overlap
ENSG00000204099	cg17280514	0.622298	0	0	0.679277	0	0	overlap
ENSG00000204099	cg20791593	-0.633585	0	0	-0.602276	0	0	overlap
ENSG00000204099	cg18485872	-0.661002	0	0	-0.528886	0	0	overlap
ENSG00000204099	cg18095041	-0.746372	0	0	-0.735847	0	0	overlap
ENSG00000204099	cg24429037	-0.771134	0	0	-0.75311	0	0	overlap
ENSG00000204099	cg22399646	-0.703594	0	0	-0.680485	0	0	overlap
ENSG00000134121	cg15225056	0.457045	1.19189e-07	0.0485342	0.454476	0	0	overlap
ENSG00000134121	cg06088575	0.513659	1.38874e-09	0.000565501	0.46051	0	0	overlap
ENSG00000134109	cg17177006	-0.545991	0	0	-0.291605	2.10039e-06	0.855289	fSpecific
ENSG00000125046	cg07781040	0.610175	0	0	0.670647	0	0	overlap
ENSG00000196220	cg09547042	0.474765	3.33138e-08	0.0135655	0.507631	0	0	overlap
ENSG00000196220	cg08690412	0.534163	1.30282e-10	5.30515e-05	0.454572	0	0	overlap
ENSG00000196220	cg15778400	0.529684	2.48219e-10	0.000101076	0.554118	0	0	overlap
ENSG00000196220	cg02032282	0.495306	6.79695e-09	0.00276775	0.426999	8.14875e-13	3.3182e-07	overlap
ENSG00000196220	cg03308831	0.46121	8.89234e-08	0.03621	0.525167	0	0	overlap
ENSG00000196220	cg00897276	0.521278	6.54941e-10	0.000266695	0.511173	0	0	overlap
ENSG00000196220	cg01177100	0.611521	0	0	0.576912	0	0	overlap
ENSG00000196220	cg06082596	0.482513	1.85927e-08	0.00757101	0.483923	0	0	overlap
ENSG00000187288	cg21562208	-0.600651	0	0	-0.572874	0	0	overlap
ENSG00000163701	cg15095327	-0.536209	9.13023e-11	3.71787e-05	-0.659095	0	0	overlap
ENSG00000163701	cg18738581	-0.484596	1.58455e-08	0.00645233	-0.620929	0	0	overlap
ENSG00000163701	cg05253480	-0.581192	0	0	-0.709793	0	0	overlap
ENSG00000132164	cg09660365	-0.530783	2.14455e-10	8.73268e-05	-0.300823	9.63248e-07	0.392238	fSpecific
ENSG00000132164	cg16435571	-0.459785	9.83425e-08	0.0400454	-0.207838	0.000801158	1	fSpecific
ENSG00000132164	cg15668533	-0.590366	0	0	-0.207644	0.000810397	1	fSpecific
ENSG00000132164	cg12461092	0.496141	6.35018e-09	0.00258582	0.615234	0	0	overlap
ENSG00000132164	cg18290624	-0.506771	2.58993e-09	0.00105463	-0.286712	3.14366e-06	1	fSpecific
ENSG00000132164	cg21123160	-0.503343	3.48381e-09	0.00141862	-0.454426	0	0	overlap
ENSG00000132164	cg22331862	-0.528147	3.01542e-10	0.000122789	-0.47897	0	0	overlap
ENSG00000132164	cg00605982	-0.470409	4.59038e-08	0.0186922	-0.234653	0.00014832	1	fSpecific
ENSG00000144712	cg11882607	0.488848	1.13816e-08	0.00463463	0.433028	2.69923e-13	1.09914e-07	overlap
ENSG00000144712	cg11200930	0.550992	0	0	0.463891	0	0	overlap
ENSG00000144712	cg02217386	0.558359	0	0	0.475455	0	0	overlap
ENSG00000144712	cg07047131	0.579189	0	0	0.452326	0	0	overlap
ENSG00000131373	cg18204685	-0.484363	1.61331e-08	0.00656947	-0.202916	0.00106905	1	fSpecific
ENSG00000154814	cg11208165	-0.503865	3.33162e-09	0.00135665	-0.500424	0	0	overlap
ENSG00000131378	cg09706245	0.601942	0	0	0.493778	0	0	overlap
ENSG00000131378	cg13487156	0.501819	3.96503e-09	0.00161458	0.430925	4.07708e-13	1.6602e-07	overlap
ENSG00000131378	cg19399514	0.631803	0	0	0.625215	0	0	overlap
ENSG00000131378	cg19480937	0.565493	0	0	0.542646	0	0	overlap
ENSG00000131378	cg18454120	0.488731	1.14864e-08	0.00467732	0.492134	0	0	overlap
ENSG00000131378	cg00259834	-0.497186	5.83015e-09	0.00237406	-0.666873	0	0	overlap
ENSG00000131378	cg07385375	0.565653	0	0	0.30545	6.44842e-07	0.262582	fSpecific
ENSG00000131378	cg05528931	0.514181	1.32221e-09	0.000538409	0.531389	0	0	overlap
ENSG00000154822	cg16292586	0.590402	0	0	0.430452	4.45237e-13	1.81302e-07	overlap
ENSG00000154822	cg25223095	-0.457032	1.19291e-07	0.0485758	-0.372852	8.40863e-10	0.000342403	overlap
ENSG00000154822	cg21767191	0.494587	7.20457e-09	0.00293373	0.348122	1.15321e-08	0.00469592	overlap
ENSG00000182568	cg26032026	0.515005	1.22298e-09	0.000498002	0.549572	0	0	overlap
ENSG00000182568	cg10248785	0.46781	5.54498e-08	0.0225794	0.514905	0	0	overlap
ENSG00000182568	cg14520829	0.519355	7.98243e-10	0.000325048	0.542391	0	0	overlap
ENSG00000182568	cg24193411	0.484817	1.55774e-08	0.00634318	0.534123	0	0	overlap
ENSG00000182568	cg21902966	0.567582	0	0	0.60705	0	0	overlap
ENSG00000182568	cg00390724	0.511982	1.62278e-09	0.000660801	0.484314	0	0	overlap
ENSG00000182568	cg01373248	0.511226	1.73916e-09	0.000708192	0.35677	4.73529e-09	0.00192823	overlap
ENSG00000183960	cg15509286	0.543447	4.48256e-12	1.82532e-06	0.375541	6.23654e-10	0.000253955	overlap
ENSG00000183960	cg06615816	0.468504	5.27294e-08	0.0214716	0.443247	0	0	overlap
ENSG00000182247	cg07379779	0.502052	3.88754e-09	0.00158302	0.545296	0	0	overlap
ENSG00000077092	cg05556038	0.463785	7.40507e-08	0.0301538	0.515737	0	0	overlap
ENSG00000163491	cg13012746	0.541708	1.95322e-11	7.95357e-06	0.476309	0	0	overlap
ENSG00000163491	cg22691926	0.539066	4.88249e-11	1.98817e-05	0.516818	0	0	overlap
ENSG00000163491	cg02860705	0.511336	1.72168e-09	0.000701073	0.51859	0	0	overlap
ENSG00000163513	cg04916416	-0.508688	2.18634e-09	0.000890285	-0.347396	1.24111e-08	0.00505387	overlap
ENSG00000144645	cg03411644	0.488326	1.18578e-08	0.00482853	0.549744	0	0	overlap
ENSG00000206557	cg17980786	0.53165	1.90214e-10	7.74557e-05	0.564893	0	0	overlap
ENSG00000206557	cg22985281	0.534568	1.21913e-10	4.96436e-05	0.459154	0	0	overlap
ENSG00000168016	cg11870261	-0.556805	0	0	-0.356328	4.95869e-09	0.0020192	overlap
ENSG00000168016	cg07696485	-0.582261	0	0	-0.354932	5.73402e-09	0.00233492	overlap
ENSG00000168016	cg01349853	-0.564061	0	0	-0.339194	2.81288e-08	0.0114542	overlap
ENSG00000144677	cg12919119	-0.563963	0	0	-0.542224	0	0	overlap
ENSG00000181061	cg03305454	-0.47428	3.45339e-08	0.0140623	-0.393427	7.86525e-11	3.20276e-05	overlap
ENSG00000144648	cg13702846	-0.458114	1.10598e-07	0.0450361	-0.567775	0	0	overlap
ENSG00000182983	cg13871633	-0.691625	0	0	-0.596995	0	0	overlap
ENSG00000182983	cg17619311	-0.552866	0	0	-0.453993	0	0	overlap
ENSG00000182983	cg24701270	-0.481929	1.94399e-08	0.00791599	-0.336012	3.83977e-08	0.0156357	overlap
ENSG00000182983	cg02838072	0.462538	8.09326e-08	0.0329561	0.560305	0	0	overlap
ENSG00000182983	cg01357292	-0.523017	5.44339e-10	0.000221657	-0.371927	9.31287e-10	0.000379224	overlap
ENSG00000182983	cg03564201	-0.506992	2.54016e-09	0.00103436	-0.457361	0	0	overlap
ENSG00000144649	cg27423228	-0.61879	0	0	-0.59897	0	0	overlap
ENSG00000144649	cg17150789	0.489493	1.08182e-08	0.00440521	0.699765	0	0	overlap
ENSG00000011198	cg24595152	-0.615343	0	0	-0.469874	0	0	overlap
ENSG00000011198	cg00486604	-0.536916	7.96013e-11	3.2414e-05	-0.328606	7.82106e-08	0.0318477	overlap
ENSG00000169981	cg25783173	-0.49361	7.79518e-09	0.00317423	-0.420033	2.4149e-12	9.83358e-07	overlap
ENSG00000169981	cg10469100	-0.554427	0	0	-0.435008	1.75559e-13	7.14883e-08	overlap
ENSG00000169981	cg11612291	-0.494556	7.22249e-09	0.00294103	-0.392574	8.71341e-11	3.54813e-05	overlap
ENSG00000169981	cg09181872	-0.568037	0	0	-0.421301	2.00045e-12	8.14589e-07	overlap
ENSG00000169981	cg20717205	-0.524369	4.69252e-10	0.000191081	-0.464034	0	0	overlap
ENSG00000169981	cg17092624	-0.51568	1.14643e-09	0.000466831	-0.503108	0	0	overlap
ENSG00000169981	cg24173921	-0.536989	7.84283e-11	3.19363e-05	-0.513207	0	0	overlap
ENSG00000169981	cg06225133	-0.507779	2.37011e-09	0.000965117	-0.519194	0	0	overlap
ENSG00000169981	cg05281708	-0.539496	4.3464e-11	1.76987e-05	-0.403329	2.3183e-11	9.4402e-06	overlap
ENSG00000196653	cg11003573	-0.660903	0	0	-0.584434	0	0	overlap
ENSG00000196653	cg10263370	-0.672848	0	0	-0.590759	0	0	overlap
ENSG00000196653	cg15687855	-0.65949	0	0	-0.526302	0	0	overlap
ENSG00000196653	cg12386808	0.686175	0	0	0.695204	0	0	overlap
ENSG00000196653	cg19539664	0.69227	0	0	0.752004	0	0	overlap
ENSG00000196653	cg18722847	-0.636393	0	0	-0.555283	0	0	overlap
ENSG00000196653	cg25151919	-0.50929	2.07181e-09	0.00084365	-0.361189	2.97385e-09	0.00121096	overlap
ENSG00000186446	cg10108389	-0.483017	1.78896e-08	0.00728473	-0.280688	5.11391e-06	1	fSpecific
ENSG00000186446	cg14955531	0.621339	0	0	0.67788	0	0	overlap
ENSG00000186446	cg06186861	-0.473634	3.62214e-08	0.0147495	-0.212317	0.000612727	1	fSpecific
ENSG00000186446	cg04890606	0.555078	0	0	0.631414	0	0	overlap
ENSG00000012223	cg25930780	0.469401	4.94024e-08	0.0201168	0.304451	7.03648e-07	0.286528	fSpecific
ENSG00000012223	cg04910591	0.479312	2.3709e-08	0.00965439	0.244498	7.59624e-05	1	fSpecific
ENSG00000241186	cg10031651	-0.592381	0	0	-0.5876	0	0	overlap
ENSG00000181585	cg21379004	-0.50239	3.77785e-09	0.00153836	-0.334872	4.28935e-08	0.0174664	overlap
ENSG00000181585	cg03004985	-0.665751	0	0	-0.571619	0	0	overlap
ENSG00000164050	cg09837648	-0.485075	1.52701e-08	0.00621804	-0.529281	0	0	overlap
ENSG00000008300	cg22702772	0.536793	8.1576e-11	3.32181e-05	0.608957	0	0	overlap
ENSG00000213672	cg21175642	-0.492516	8.50993e-09	0.00346528	-0.306336	5.96736e-07	0.242993	fSpecific
ENSG00000178467	cg09610987	-0.647539	0	0	-0.751086	0	0	overlap
ENSG00000178467	cg22508782	-0.55968	0	0	-0.67505	0	0	overlap
ENSG00000178252	cg08455380	-0.467103	5.83553e-08	0.0237625	-0.214838	0.00052564	1	fSpecific
ENSG00000188315	cg10259735	0.671871	0	0	0.694966	0	0	overlap
ENSG00000188315	cg11098493	0.718089	0	0	0.714057	0	0	overlap
ENSG00000188315	cg07758574	0.676885	0	0	0.702598	0	0	overlap
ENSG00000188315	cg08846852	0.663601	0	0	0.652134	0	0	overlap
ENSG00000188315	cg14798641	0.524879	4.43171e-10	0.000180461	0.528074	0	0	overlap
ENSG00000188315	cg19498237	0.679896	0	0	0.715617	0	0	overlap
ENSG00000188315	cg18605031	0.504424	3.17543e-09	0.00129305	0.624265	0	0	overlap
ENSG00000188315	cg20835282	0.699367	0	0	0.717278	0	0	overlap
ENSG00000188315	cg20603260	0.714734	0	0	0.721472	0	0	overlap
ENSG00000188315	cg16523704	0.637849	0	0	0.699789	0	0	overlap
ENSG00000188315	cg06241292	0.726034	0	0	0.710078	0	0	overlap
ENSG00000188315	cg07207099	0.689352	0	0	0.721261	0	0	overlap
ENSG00000114316	cg10259735	-0.633051	0	0	-0.615967	0	0	overlap
ENSG00000114316	cg11098493	-0.614255	0	0	-0.616734	0	0	overlap
ENSG00000114316	cg07758574	-0.602132	0	0	-0.617876	0	0	overlap
ENSG00000114316	cg08846852	-0.572743	0	0	-0.583397	0	0	overlap
ENSG00000114316	cg14798641	-0.495164	6.87534e-09	0.00279967	-0.528896	0	0	overlap
ENSG00000114316	cg19498237	-0.627533	0	0	-0.616795	0	0	overlap
ENSG00000114316	cg18605031	-0.559539	0	0	-0.531838	0	0	overlap
ENSG00000114316	cg20835282	-0.624688	0	0	-0.630888	0	0	overlap
ENSG00000114316	cg20603260	-0.640399	0	0	-0.62927	0	0	overlap
ENSG00000114316	cg16523704	-0.678912	0	0	-0.620003	0	0	overlap
ENSG00000114316	cg06241292	-0.622593	0	0	-0.618458	0	0	overlap
ENSG00000114316	cg07207099	-0.640025	0	0	-0.651055	0	0	overlap
ENSG00000233276	cg18642234	-0.507521	2.42473e-09	0.000987362	-0.463489	0	0	overlap
ENSG00000164061	cg22111074	0.478022	2.6127e-08	0.010639	0.419722	2.52778e-12	1.02932e-06	overlap
ENSG00000164061	cg07308293	0.549161	0	0	0.524046	0	0	overlap
ENSG00000164061	cg07467919	0.526919	3.49951e-10	0.000142502	0.430799	4.17427e-13	1.69978e-07	overlap
ENSG00000164061	cg03589259	0.485438	1.4848e-08	0.00604617	0.345327	1.52903e-08	0.00622626	overlap
ENSG00000182179	cg19381811	-0.461008	9.02086e-08	0.0367333	-0.40673	1.49926e-11	6.10506e-06	overlap
ENSG00000164078	cg27360567	-0.509671	2.00217e-09	0.000815291	-0.429065	5.71735e-13	2.32813e-07	overlap
ENSG00000164078	cg18129748	-0.45965	9.92835e-08	0.0404286	-0.471559	0	0	overlap
ENSG00000164078	cg01917209	-0.493094	8.12517e-09	0.0033086	-0.363991	2.20577e-09	0.000898197	overlap
ENSG00000001617	cg19515239	-0.489868	1.0503e-08	0.00427688	-0.117533	0.059435	1	fSpecific
ENSG00000001617	cg25336900	-0.476031	3.0322e-08	0.0123472	-0.290314	2.33792e-06	0.952011	fSpecific
ENSG00000012171	cg12069309	0.502949	3.60258e-09	0.00146698	0.528602	0	0	overlap
ENSG00000012171	cg14651518	0.476885	2.84495e-08	0.0115847	0.495141	0	0	overlap
ENSG00000088543	cg11975445	-0.476479	2.93244e-08	0.011941	-0.231597	0.000181552	1	fSpecific
ENSG00000247596	cg14339750	-0.580657	0	0	-0.537479	0	0	overlap
ENSG00000247596	cg03890877	-0.565856	0	0	-0.448843	0	0	overlap
ENSG00000114854	cg26738080	-0.484584	1.58605e-08	0.00645845	-0.295698	1.49064e-06	0.606994	fSpecific
ENSG00000114854	cg27024515	-0.683152	0	0	-0.531633	0	0	overlap
ENSG00000114854	cg08485937	-0.733419	0	0	-0.525388	0	0	overlap
ENSG00000114854	cg16850945	-0.656922	0	0	-0.508713	0	0	overlap
ENSG00000114854	cg24166628	-0.714513	0	0	-0.505098	0	0	overlap
ENSG00000114854	cg22118465	-0.60674	0	0	-0.494817	0	0	overlap
ENSG00000168268	cg02231066	-0.490151	1.02711e-08	0.00418244	-0.394484	6.9239e-11	2.81944e-05	overlap
ENSG00000168268	cg05564831	-0.546144	0	0	-0.541403	0	0	overlap
ENSG00000168268	cg07507251	-0.536344	8.89982e-11	3.62404e-05	-0.409159	1.0912e-11	4.4434e-06	overlap
ENSG00000163931	cg07621169	-0.464737	6.91757e-08	0.0281686	-0.673064	0	0	overlap
ENSG00000163931	cg04860291	-0.509518	2.02999e-09	0.000826622	-0.598373	0	0	overlap
ENSG00000157388	cg27335600	-0.48432	1.61867e-08	0.00659127	-0.375744	6.09644e-10	0.00024825	overlap
ENSG00000157388	cg07883600	-0.464375	7.09941e-08	0.0289091	-0.35037	9.17336e-09	0.00373543	overlap
ENSG00000157388	cg09662638	0.457425	1.16057e-07	0.047259	0.432832	2.80945e-13	1.14402e-07	overlap
ENSG00000157388	cg19033906	-0.474796	3.32379e-08	0.0135346	-0.36022	3.29505e-09	0.00134176	overlap
ENSG00000157388	cg01942127	-0.556854	0	0	-0.373992	7.41096e-10	0.000301777	overlap
ENSG00000157388	cg00336149	0.491939	8.91169e-09	0.00362887	0.293833	1.74387e-06	0.710111	fSpecific
ENSG00000114251	cg20741319	0.497002	5.91895e-09	0.00241022	0.582722	0	0	overlap
ENSG00000114251	cg18010752	0.465702	6.45505e-08	0.0262852	0.560794	0	0	overlap
ENSG00000114251	cg24158324	0.510157	1.91647e-09	0.000780393	0.443893	0	0	overlap
ENSG00000114251	cg22143766	0.471429	4.26035e-08	0.0173483	0.567371	0	0	overlap
ENSG00000114251	cg02298472	0.562605	0	0	0.618801	0	0	overlap
ENSG00000114251	cg01109065	0.481708	1.97704e-08	0.00805057	0.404599	1.9723e-11	8.03127e-06	overlap
ENSG00000114251	cg04685478	0.51023	1.90374e-09	0.000775211	0.558783	0	0	overlap
ENSG00000163947	cg01016119	-0.576977	0	0	-0.53811	0	0	overlap
ENSG00000163666	cg26870874	0.503312	3.49296e-09	0.00142235	0.371753	9.49312e-10	0.000386564	overlap
ENSG00000163666	cg10608341	0.458747	1.05795e-07	0.0430802	0.414656	5.19645e-12	2.11602e-06	overlap
ENSG00000174844	cg06376939	0.508025	2.31911e-09	0.000944353	0.499647	0	0	overlap
ENSG00000136068	cg19600372	-0.479103	2.40855e-08	0.00980772	-0.299832	1.0487e-06	0.427035	fSpecific
ENSG00000114405	cg11120913	-0.66078	0	0	-0.474017	0	0	overlap
ENSG00000114405	cg15059608	-0.600909	0	0	-0.418546	2.9995e-12	1.22141e-06	overlap
ENSG00000114405	cg02221302	-0.648547	0	0	-0.564338	0	0	overlap
ENSG00000114405	cg01832005	-0.610863	0	0	-0.513321	0	0	overlap
ENSG00000114405	cg01384143	-0.489413	1.08865e-08	0.00443302	-0.324615	1.139e-07	0.0463805	overlap
ENSG00000114405	cg06143346	0.48647	1.37057e-08	0.00558103	0.435468	1.57636e-13	6.41902e-08	overlap
ENSG00000163618	cg23487312	0.470771	4.47038e-08	0.0182036	0.201615	0.00115251	1	fSpecific
ENSG00000163618	cg24954210	0.467097	5.83812e-08	0.0237731	0.190107	0.00219765	1	fSpecific
ENSG00000163618	cg24605023	0.47482	3.31774e-08	0.01351	0.268019	1.37356e-05	1	fSpecific
ENSG00000163618	cg23003926	0.594187	0	0	0.238721	0.000112864	1	fSpecific
ENSG00000163637	cg25818214	0.558998	0	0	0.267861	1.39024e-05	1	fSpecific
ENSG00000163637	cg10597192	0.541032	2.62348e-11	1.06829e-05	0.335384	4.08148e-08	0.0166199	overlap
ENSG00000163637	cg10601100	0.631594	0	0	0.559609	0	0	overlap
ENSG00000163637	cg09607712	0.535109	1.11265e-10	4.53074e-05	0.438852	6.05431e-14	2.46534e-08	overlap
ENSG00000163637	cg08804517	0.58792	0	0	0.462319	0	0	overlap
ENSG00000163637	cg15081402	0.495318	6.79017e-09	0.00276499	0.229168	0.000212808	1	fSpecific
ENSG00000163637	cg12970730	0.549081	0	0	0.366023	1.77302e-09	0.000721981	overlap
ENSG00000163637	cg12821367	0.557346	0	0	0.481505	0	0	overlap
ENSG00000163637	cg14014950	0.652252	0	0	0.550477	0	0	overlap
ENSG00000163637	cg14143330	0.491754	9.0436e-09	0.00368259	0.384483	2.25762e-10	9.19311e-05	overlap
ENSG00000163637	cg19272144	0.489856	1.05132e-08	0.00428103	0.338559	2.9938e-08	0.0121909	overlap
ENSG00000163637	cg20584157	0.629395	0	0	0.627079	0	0	overlap
ENSG00000163637	cg20525037	0.551183	0	0	0.51902	0	0	overlap
ENSG00000163637	cg17393041	0.493659	7.76442e-09	0.0031617	0.477481	0	0	overlap
ENSG00000163637	cg16810559	0.472473	3.94584e-08	0.0160676	0.580583	0	0	overlap
ENSG00000163637	cg21178378	0.48271	1.83153e-08	0.00745805	0.289419	2.51741e-06	1	fSpecific
ENSG00000163637	cg22801134	0.585536	0	0	0.569997	0	0	overlap
ENSG00000163637	cg22679740	0.620086	0	0	0.505366	0	0	overlap
ENSG00000163637	cg23047271	0.593917	0	0	0.420577	2.22848e-12	9.07446e-07	overlap
ENSG00000163637	cg22475071	0.563859	0	0	0.474903	0	0	overlap
ENSG00000163637	cg00134602	0.50392	3.31586e-09	0.00135023	0.297364	1.29454e-06	0.527141	fSpecific
ENSG00000163637	cg00326836	0.6189	0	0	0.523509	0	0	overlap
ENSG00000163637	cg01165355	0.547023	0	0	0.464526	0	0	overlap
ENSG00000163637	cg05674046	0.506347	2.68781e-09	0.00109449	0.468308	0	0	overlap
ENSG00000163637	cg07357021	0.703005	0	0	0.689134	0	0	overlap
ENSG00000163637	cg04108438	0.524694	4.52462e-10	0.000184244	0.323919	1.21544e-07	0.0494931	overlap
ENSG00000144749	cg06096184	-0.518513	8.68763e-10	0.000353764	-0.508903	0	0	overlap
ENSG00000114541	cg27423627	-0.575705	0	0	-0.325765	1.02261e-07	0.0416411	overlap
ENSG00000187098	cg08652499	0.481874	1.9522e-08	0.00794944	0.505355	0	0	overlap
ENSG00000163412	cg18504632	0.597935	0	0	0.559604	0	0	overlap
ENSG00000163412	cg01454951	0.523429	5.20519e-10	0.000211957	0.468737	0	0	overlap
ENSG00000113805	cg08105471	0.491398	9.30385e-09	0.00378857	0.495574	0	0	overlap
ENSG00000113805	cg07674386	0.475588	3.13374e-08	0.0127607	0.527728	0	0	overlap
ENSG00000185008	cg08512168	0.506691	2.60812e-09	0.00106204	0.506949	0	0	overlap
ENSG00000185008	cg16933762	0.494937	7.00322e-09	0.00285174	0.433689	2.35083e-13	9.57268e-08	overlap
ENSG00000185008	cg02477365	0.48067	2.13942e-08	0.00871181	0.384983	2.13056e-10	8.67575e-05	overlap
ENSG00000169855	cg13300630	0.460092	9.62354e-08	0.0391874	0.607687	0	0	overlap
ENSG00000169855	cg24512093	0.646384	0	0	0.669606	0	0	overlap
ENSG00000169855	cg00751770	0.466058	6.29176e-08	0.0256203	0.471828	0	0	overlap
ENSG00000181458	cg07907506	-0.636528	0	0	-0.515498	0	0	overlap
ENSG00000181458	cg07089276	0.47957	2.32516e-08	0.00946813	0.404681	1.95179e-11	7.94776e-06	overlap
ENSG00000081148	cg12249537	0.487392	1.27564e-08	0.00519444	0.337533	3.31051e-08	0.0134805	overlap
ENSG00000114446	cg08476757	-0.466488	6.09993e-08	0.0248392	-0.468608	0	0	overlap
ENSG00000121570	cg12443195	-0.462968	7.84934e-08	0.0319628	-0.526538	0	0	overlap
ENSG00000144824	cg22874988	-0.539865	3.90622e-11	1.59063e-05	-0.538746	0	0	overlap
ENSG00000114529	cg08451978	0.510747	1.81675e-09	0.000739786	0.276661	7.03692e-06	1	fSpecific
ENSG00000114529	cg02617418	0.500025	4.60967e-09	0.00187707	0.350015	9.51201e-09	0.00387333	overlap
ENSG00000114529	cg00714564	0.502845	3.63474e-09	0.00148008	0.48903	0	0	overlap
ENSG00000114529	cg01192489	0.53573	9.97302e-11	4.06105e-05	0.500018	0	0	overlap
ENSG00000114529	cg06510261	0.466661	6.02477e-08	0.0245331	0.291493	2.12001e-06	0.863277	fSpecific
ENSG00000121578	cg11261958	-0.485831	1.44027e-08	0.00586482	-0.418026	3.23259e-12	1.31632e-06	overlap
ENSG00000183833	cg23202738	-0.488528	1.16707e-08	0.00475236	-0.526221	0	0	overlap
ENSG00000183833	cg21372329	-0.462409	8.16784e-08	0.0332598	-0.30783	5.23265e-07	0.213076	fSpecific
ENSG00000183833	cg01663469	-0.517155	9.93659e-10	0.000404622	-0.388695	1.38107e-10	5.62377e-05	overlap
ENSG00000144852	cg25574175	-0.519521	7.84931e-10	0.000319627	-0.468014	0	0	overlap
ENSG00000145103	cg12794469	-0.471717	4.17109e-08	0.0169848	-0.371487	9.77547e-10	0.000398061	overlap
ENSG00000121552	cg14664412	-0.731023	0	0	-0.735627	0	0	overlap
ENSG00000121552	cg21932814	-0.757499	0	0	-0.717191	0	0	overlap
ENSG00000173200	cg23442853	-0.500301	4.5044e-09	0.00183421	-0.536871	0	0	overlap
ENSG00000173200	cg02346790	-0.496344	6.24598e-09	0.00254339	-0.547163	0	0	overlap
ENSG00000173702	cg26225893	-0.593806	0	0	-0.555139	0	0	overlap
ENSG00000173702	cg09081544	-0.481573	1.99749e-08	0.00813387	-0.512308	0	0	overlap
ENSG00000173702	cg06196689	-0.700504	0	0	-0.616892	0	0	overlap
ENSG00000173706	cg00529567	-0.492344	8.62779e-09	0.00351327	-0.443844	0	0	overlap
ENSG00000221955	cg12788878	0.51082	1.80461e-09	0.000734845	0.579266	0	0	overlap
ENSG00000221955	cg14391622	-0.499828	4.6859e-09	0.00190812	-0.474948	0	0	overlap
ENSG00000221955	cg07405771	-0.586771	0	0	-0.552236	0	0	overlap
ENSG00000221955	cg06983508	-0.601573	0	0	-0.572442	0	0	overlap
ENSG00000144908	cg08509840	-0.487349	1.27992e-08	0.0052119	-0.506678	0	0	overlap
ENSG00000159650	cg08027748	-0.764541	0	0	-0.657609	0	0	overlap
ENSG00000159650	cg17059675	-0.695816	0	0	-0.531265	0	0	overlap
ENSG00000159650	cg17676574	-0.678912	0	0	-0.559994	0	0	overlap
ENSG00000159650	cg01966522	-0.619029	0	0	-0.545501	0	0	overlap
ENSG00000159650	cg00577527	-0.697641	0	0	-0.565771	0	0	overlap
ENSG00000159650	cg05620036	-0.564854	0	0	-0.534896	0	0	overlap
ENSG00000159650	cg06765947	-0.591275	0	0	-0.599437	0	0	overlap
ENSG00000180767	cg08027748	-0.572363	0	0	-0.425341	1.06924e-12	4.35397e-07	overlap
ENSG00000180767	cg17059675	-0.491484	9.2404e-09	0.00376273	-0.362525	2.58002e-09	0.00105059	overlap
ENSG00000180767	cg17676574	-0.535779	9.88469e-11	4.02509e-05	-0.33799	3.16571e-08	0.0128909	overlap
ENSG00000180767	cg01966522	-0.507545	2.41948e-09	0.000985223	-0.400881	3.15521e-11	1.28481e-05	overlap
ENSG00000180767	cg00577527	-0.542065	1.61982e-11	6.59597e-06	-0.366318	1.71734e-09	0.000699307	overlap
ENSG00000180767	cg05620036	-0.507373	2.45646e-09	0.00100028	-0.399012	3.9804e-11	1.62083e-05	overlap
ENSG00000180767	cg06765947	-0.48432	1.61867e-08	0.00659127	-0.457931	0	0	overlap
ENSG00000114631	cg12943155	-0.515091	1.213e-09	0.000493937	-0.405841	1.68162e-11	6.84763e-06	overlap
ENSG00000074416	cg04155862	-0.507951	2.33431e-09	0.000950539	-0.59737	0	0	overlap
ENSG00000179348	cg13483882	0.479164	2.39742e-08	0.00976239	0.383803	2.44224e-10	9.94489e-05	overlap
ENSG00000179348	cg19759549	0.46526	6.66337e-08	0.0271335	0.370646	1.07221e-09	0.00043661	overlap
ENSG00000179348	cg22801992	0.470575	4.53509e-08	0.0184671	0.449479	0	0	overlap
ENSG00000179348	cg06796779	0.479539	2.33056e-08	0.00949012	0.394976	6.52426e-11	2.65671e-05	overlap
ENSG00000179348	cg03839949	0.466624	6.0408e-08	0.0245984	0.397871	4.58227e-11	1.86592e-05	overlap
ENSG00000004399	cg12415479	-0.468037	5.45446e-08	0.0222108	-0.357012	4.6168e-09	0.00187998	overlap
ENSG00000004399	cg02544002	-0.550618	0	0	-0.470743	0	0	overlap
ENSG00000114670	cg01378599	0.495011	6.96151e-09	0.00283475	0.621041	0	0	overlap
ENSG00000091513	cg10772086	-0.498114	5.40171e-09	0.0021996	-0.448293	0	0	overlap
ENSG00000091513	cg16267236	-0.470458	4.57393e-08	0.0186252	-0.526072	0	0	overlap
ENSG00000091513	cg02621528	-0.467158	5.81228e-08	0.0236678	-0.533204	0	0	overlap
ENSG00000091513	cg01569827	-0.458255	1.09508e-07	0.0445921	-0.478418	0	0	overlap
ENSG00000154928	cg01363198	0.469192	5.01588e-08	0.0204249	0.343434	1.84807e-08	0.00752543	overlap
ENSG00000073711	cg11162839	0.47608	3.02111e-08	0.0123021	0.526975	0	0	overlap
ENSG00000073711	cg07038400	-0.478077	2.60188e-08	0.010595	-0.335412	4.07042e-08	0.0165749	overlap
ENSG00000073711	cg04013733	0.47071	4.49051e-08	0.0182855	0.52331	0	0	overlap
ENSG00000168917	cg10727673	-0.617794	0	0	-0.630761	0	0	overlap
ENSG00000168917	cg10258419	-0.488793	1.14311e-08	0.0046548	-0.369146	1.26337e-09	0.000514449	overlap
ENSG00000168917	cg13621410	-0.497966	5.4678e-09	0.00222651	-0.380002	3.77326e-10	0.000153649	overlap
ENSG00000168917	cg02672493	-0.546611	0	0	-0.518104	0	0	overlap
ENSG00000158163	cg09375033	-0.543705	2.49767e-12	1.01706e-06	-0.531122	0	0	overlap
ENSG00000158186	cg10731507	-0.634697	0	0	-0.382805	2.73948e-10	0.000111553	overlap
ENSG00000158220	cg08931849	0.572	0	0	0.553692	0	0	overlap
ENSG00000177311	cg13787933	-0.519281	8.04221e-10	0.000327482	-0.513154	0	0	overlap
ENSG00000188582	cg02862761	-0.483459	1.72931e-08	0.00704182	-0.431373	3.74504e-13	1.52499e-07	overlap
ENSG00000152952	cg22234419	-0.509223	2.08439e-09	0.000848773	-0.361275	2.94663e-09	0.00119988	overlap
ENSG00000188313	cg06981309	-0.585604	0	0	-0.665662	0	0	overlap
ENSG00000174963	cg26790247	0.565241	0	0	0.577819	0	0	overlap
ENSG00000174963	cg27606499	-0.4691	5.0496e-08	0.0205622	-0.481876	0	0	overlap
ENSG00000174963	cg25590492	0.639816	0	0	0.621063	0	0	overlap
ENSG00000174963	cg26375057	0.503594	3.40962e-09	0.00138841	0.496485	0	0	overlap
ENSG00000174963	cg10107050	0.593051	0	0	0.656719	0	0	overlap
ENSG00000174963	cg11142389	0.536203	9.14078e-11	3.72216e-05	0.595325	0	0	overlap
ENSG00000174963	cg08091192	0.639625	0	0	0.672911	0	0	overlap
ENSG00000174963	cg08013557	0.688639	0	0	0.67958	0	0	overlap
ENSG00000174963	cg09241332	0.516547	1.0544e-09	0.000429358	0.541363	0	0	overlap
ENSG00000174963	cg08889797	0.560473	0	0	0.451673	0	0	overlap
ENSG00000174963	cg15002294	0.505935	2.78606e-09	0.00113449	0.658685	0	0	overlap
ENSG00000174963	cg14741939	0.577333	0	0	0.597659	0	0	overlap
ENSG00000174963	cg14750948	0.496227	6.30578e-09	0.00256774	0.587843	0	0	overlap
ENSG00000174963	cg16181396	0.510298	1.89214e-09	0.000770488	0.58599	0	0	overlap
ENSG00000174963	cg16209664	0.509935	1.95511e-09	0.000796127	0.469059	0	0	overlap
ENSG00000174963	cg16240162	0.619558	0	0	0.54494	0	0	overlap
ENSG00000174963	cg12976081	0.545002	0	0	0.483017	0	0	overlap
ENSG00000174963	cg13278496	0.585825	0	0	0.678531	0	0	overlap
ENSG00000174963	cg13015925	0.583195	0	0	0.632087	0	0	overlap
ENSG00000174963	cg12732998	0.630796	0	0	0.690329	0	0	overlap
ENSG00000174963	cg19516404	0.527496	3.26524e-10	0.000132962	0.53413	0	0	overlap
ENSG00000174963	cg18731327	0.558286	0	0	0.618568	0	0	overlap
ENSG00000174963	cg16768018	0.460326	9.46628e-08	0.0385471	0.47638	0	0	overlap
ENSG00000174963	cg16790847	0.510476	1.86186e-09	0.000758158	0.509016	0	0	overlap
ENSG00000174963	cg18424634	0.537174	7.55344e-11	3.07579e-05	0.670087	0	0	overlap
ENSG00000174963	cg17569743	0.496147	6.347e-09	0.00258452	0.393403	7.88842e-11	3.2122e-05	overlap
ENSG00000174963	cg23980740	0.585272	0	0	0.610643	0	0	overlap
ENSG00000174963	cg23957311	0.457045	1.19189e-07	0.0485342	0.453851	0	0	overlap
ENSG00000174963	cg23448486	0.530998	2.08251e-10	8.48005e-05	0.524117	0	0	overlap
ENSG00000174963	cg25425140	0.60961	0	0	0.602375	0	0	overlap
ENSG00000174963	cg25449440	0.535435	1.05123e-10	4.28063e-05	0.650151	0	0	overlap
ENSG00000174963	cg24620761	0.562839	0	0	0.637027	0	0	overlap
ENSG00000174963	cg21639713	0.532135	1.77479e-10	7.22703e-05	0.586805	0	0	overlap
ENSG00000174963	cg21127068	0.594998	0	0	0.639541	0	0	overlap
ENSG00000174963	cg02387803	0.555084	0	0	0.619981	0	0	overlap
ENSG00000174963	cg02630214	0.525407	4.17367e-10	0.000169954	0.593538	0	0	overlap
ENSG00000174963	cg01825295	0.667515	0	0	0.731296	0	0	overlap
ENSG00000174963	cg03355998	0.599306	0	0	0.653015	0	0	overlap
ENSG00000174963	cg03388789	0.569253	0	0	0.597774	0	0	overlap
ENSG00000174963	cg02820514	0.600897	0	0	0.671217	0	0	overlap
ENSG00000174963	cg00154357	-0.543865	1.29908e-12	5.28991e-07	-0.530839	0	0	overlap
ENSG00000174963	cg00028935	0.550962	0	0	0.645597	0	0	overlap
ENSG00000174963	cg00334063	0.489469	1.08392e-08	0.00441375	0.474391	0	0	overlap
ENSG00000174963	cg01610632	0.555386	0	0	0.406952	1.45666e-11	5.93158e-06	overlap
ENSG00000174963	cg00842299	0.67729	0	0	0.64788	0	0	overlap
ENSG00000174963	cg06166523	0.547048	0	0	0.589109	0	0	overlap
ENSG00000174963	cg06070263	0.588467	0	0	0.636098	0	0	overlap
ENSG00000174963	cg06369327	0.629284	0	0	0.634119	0	0	overlap
ENSG00000174963	cg05716671	0.658679	0	0	0.709548	0	0	overlap
ENSG00000174963	cg05548555	0.603164	0	0	0.649014	0	0	overlap
ENSG00000174963	cg05855917	0.66977	0	0	0.641267	0	0	overlap
ENSG00000174963	cg04079301	0.530366	2.26873e-10	9.23837e-05	0.370293	1.11442e-09	0.000453796	overlap
ENSG00000174963	cg03631131	0.572768	0	0	0.577433	0	0	overlap
ENSG00000174963	cg05095591	0.456817	1.21096e-07	0.0493107	0.458501	0	0	overlap
ENSG00000174963	cg04556126	0.543269	5.88884e-12	2.39796e-06	0.45235	0	0	overlap
ENSG00000152977	cg27136844	0.506722	2.60111e-09	0.00105918	0.571816	0	0	overlap
ENSG00000152977	cg26790247	0.517118	9.97253e-10	0.000406085	0.546531	0	0	overlap
ENSG00000152977	cg27606499	-0.569456	0	0	-0.532295	0	0	overlap
ENSG00000152977	cg25590492	0.64577	0	0	0.651802	0	0	overlap
ENSG00000152977	cg25503888	0.528817	2.77361e-10	0.000112943	0.564254	0	0	overlap
ENSG00000152977	cg10943786	0.630095	0	0	0.6337	0	0	overlap
ENSG00000152977	cg10107050	0.577358	0	0	0.677572	0	0	overlap
ENSG00000152977	cg11142389	0.525186	4.28021e-10	0.000174292	0.617114	0	0	overlap
ENSG00000152977	cg08091192	0.671594	0	0	0.690461	0	0	overlap
ENSG00000152977	cg08013557	0.706409	0	0	0.719464	0	0	overlap
ENSG00000152977	cg09241332	0.527318	3.33621e-10	0.000135852	0.519926	0	0	overlap
ENSG00000152977	cg08889797	0.566126	0	0	0.423218	1.49434e-12	6.08499e-07	overlap
ENSG00000152977	cg15002294	0.503644	3.39532e-09	0.00138259	0.643444	0	0	overlap
ENSG00000152977	cg14741939	0.592092	0	0	0.625862	0	0	overlap
ENSG00000152977	cg14750948	0.521972	6.08765e-10	0.000247891	0.614187	0	0	overlap
ENSG00000152977	cg14563954	0.510568	1.84637e-09	0.00075185	0.392387	8.91025e-11	3.62829e-05	overlap
ENSG00000152977	cg16181396	0.466857	5.93996e-08	0.0241877	0.60027	0	0	overlap
ENSG00000152977	cg16209664	0.549014	0	0	0.500939	0	0	overlap
ENSG00000152977	cg16240162	0.564799	0	0	0.490712	0	0	overlap
ENSG00000152977	cg12976081	0.558157	0	0	0.442083	9.21111e-15	3.7508e-09	overlap
ENSG00000152977	cg13278496	0.60102	0	0	0.734797	0	0	overlap
ENSG00000152977	cg13015925	0.604596	0	0	0.676267	0	0	overlap
ENSG00000152977	cg12732998	0.683588	0	0	0.761007	0	0	overlap
ENSG00000152977	cg19516404	0.498968	5.03332e-09	0.00204959	0.5499	0	0	overlap
ENSG00000152977	cg18731327	0.609548	0	0	0.645706	0	0	overlap
ENSG00000152977	cg20136061	0.572934	0	0	0.664621	0	0	overlap
ENSG00000152977	cg17003736	-0.492006	8.86377e-09	0.00360936	-0.484371	0	0	overlap
ENSG00000152977	cg16790847	0.474181	3.47861e-08	0.014165	0.537473	0	0	overlap
ENSG00000152977	cg18424634	0.572897	0	0	0.692442	0	0	overlap
ENSG00000152977	cg17569743	0.547005	0	0	0.450018	0	0	overlap
ENSG00000152977	cg17884843	0.517008	1.0081e-09	0.000410503	0.387519	1.58558e-10	6.45655e-05	overlap
ENSG00000152977	cg23980740	0.595668	0	0	0.623545	0	0	overlap
ENSG00000152977	cg23147574	0.557376	0	0	0.59656	0	0	overlap
ENSG00000152977	cg23448486	0.511171	1.74796e-09	0.000711775	0.539102	0	0	overlap
ENSG00000152977	cg25449440	0.554366	0	0	0.675414	0	0	overlap
ENSG00000152977	cg24620761	0.551871	0	0	0.66457	0	0	overlap
ENSG00000152977	cg21639713	0.583257	0	0	0.635115	0	0	overlap
ENSG00000152977	cg21776417	0.575502	0	0	0.667881	0	0	overlap
ENSG00000152977	cg21127068	0.561512	0	0	0.681358	0	0	overlap
ENSG00000152977	cg02387803	0.527926	3.0986e-10	0.000126176	0.633886	0	0	overlap
ENSG00000152977	cg01825295	0.730353	0	0	0.784649	0	0	overlap
ENSG00000152977	cg03355998	0.610906	0	0	0.687049	0	0	overlap
ENSG00000152977	cg03388789	0.627355	0	0	0.625226	0	0	overlap
ENSG00000152977	cg02820514	0.604018	0	0	0.739981	0	0	overlap
ENSG00000152977	cg00154357	-0.617045	0	0	-0.579294	0	0	overlap
ENSG00000152977	cg00028935	0.596418	0	0	0.67577	0	0	overlap
ENSG00000152977	cg01610632	0.50314	3.54459e-09	0.00144337	0.4123	7.17243e-12	2.92064e-06	overlap
ENSG00000152977	cg00842299	0.709315	0	0	0.708644	0	0	overlap
ENSG00000152977	cg06166523	0.590808	0	0	0.638332	0	0	overlap
ENSG00000152977	cg06070263	0.608805	0	0	0.662089	0	0	overlap
ENSG00000152977	cg06369327	0.65581	0	0	0.68023	0	0	overlap
ENSG00000152977	cg05716671	0.6862	0	0	0.743811	0	0	overlap
ENSG00000152977	cg05548555	0.606132	0	0	0.704029	0	0	overlap
ENSG00000152977	cg05855917	0.687699	0	0	0.667447	0	0	overlap
ENSG00000152977	cg04079301	0.530802	2.13918e-10	8.71082e-05	0.346702	1.33124e-08	0.00542088	overlap
ENSG00000152977	cg03631131	0.543379	5.0125e-12	2.04111e-06	0.614207	0	0	overlap
ENSG00000152977	cg04556126	0.479465	2.34357e-08	0.00954311	0.387326	1.62192e-10	6.60454e-05	overlap
ENSG00000163762	cg11011913	-0.563023	0	0	-0.375818	6.04664e-10	0.000246222	overlap
ENSG00000018408	cg11050612	-0.653837	0	0	-0.517387	0	0	overlap
ENSG00000018408	cg19483007	-0.483349	1.74404e-08	0.00710182	-0.290663	2.27124e-06	0.924857	fSpecific
ENSG00000018408	cg23017915	-0.57933	0	0	-0.521366	0	0	overlap
ENSG00000070087	cg10636490	-0.558599	0	0	-0.588123	0	0	overlap
ENSG00000144893	cg10946333	0.536436	8.74453e-11	3.56081e-05	0.407896	1.2881e-11	5.24521e-06	overlap
ENSG00000144893	cg12207930	0.494605	7.19384e-09	0.00292936	0.230927	0.000189716	1	fSpecific
ENSG00000144893	cg11566131	0.530538	2.21701e-10	9.02774e-05	0.325675	1.03123e-07	0.0419922	overlap
ENSG00000144893	cg16899444	0.602562	0	0	0.317373	2.22328e-07	0.090533	fSpecific
ENSG00000144893	cg17795586	0.569364	0	0	0.312628	3.41499e-07	0.13906	fSpecific
ENSG00000144893	cg25117092	0.46196	8.43221e-08	0.0343363	0.317452	2.20733e-07	0.0898833	fSpecific
ENSG00000144893	cg24983716	0.467724	5.5796e-08	0.0227204	0.29367	1.76783e-06	0.719868	fSpecific
ENSG00000144893	cg00091349	0.478329	2.5531e-08	0.0103963	0.284095	3.88902e-06	1	fSpecific
ENSG00000144893	cg06512350	0.575515	0	0	0.357347	4.45762e-09	0.00181516	overlap
ENSG00000196549	cg27235955	0.538894	5.10392e-11	2.07833e-05	0.597966	0	0	overlap
ENSG00000196549	cg25511593	0.469813	4.79434e-08	0.0195228	0.472897	0	0	overlap
ENSG00000196549	cg08019718	0.459988	9.69469e-08	0.0394772	0.583793	0	0	overlap
ENSG00000196549	cg02071853	0.477653	2.68598e-08	0.0109374	0.485461	0	0	overlap
ENSG00000114805	cg23626908	0.556258	0	0	0.464863	0	0	overlap
ENSG00000178053	cg20182358	-0.557094	0	0	-0.18404	0.00304562	1	fSpecific
ENSG00000178053	cg21074827	-0.456811	1.21148e-07	0.0493319	-0.243365	8.21589e-05	1	fSpecific
ENSG00000213186	cg10273210	-0.485174	1.51545e-08	0.00617098	-0.418474	3.03083e-12	1.23416e-06	overlap
ENSG00000213186	cg23704082	-0.485567	1.47005e-08	0.00598609	-0.400004	3.51976e-11	1.43326e-05	overlap
ENSG00000213186	cg01459132	-0.470421	4.58626e-08	0.0186754	-0.382785	2.74564e-10	0.000111804	overlap
ENSG00000163590	cg04747996	0.470353	4.60895e-08	0.0187678	0.45595	0	0	overlap
ENSG00000169255	cg13072057	-0.464203	7.1873e-08	0.029267	-0.299534	1.07584e-06	0.438088	fSpecific
ENSG00000121871	cg00059161	0.459005	1.03894e-07	0.0423061	0.516906	0	0	overlap
ENSG00000173905	cg17346500	-0.461008	9.02086e-08	0.0367333	-0.510303	0	0	overlap
ENSG00000085276	cg09380805	0.532092	1.78584e-10	7.27201e-05	0.326818	9.26158e-08	0.0377135	overlap
ENSG00000136603	cg20085953	-0.542316	1.39217e-11	5.66897e-06	-0.502987	0	0	overlap
ENSG00000163581	cg07649206	-0.467484	5.67713e-08	0.0231175	-0.458868	0	0	overlap
ENSG00000163581	cg03464896	-0.550034	0	0	-0.571177	0	0	overlap
ENSG00000154310	cg10180092	0.515533	1.16277e-09	0.000473484	0.573296	0	0	overlap
ENSG00000154310	cg14975410	0.626009	0	0	0.685195	0	0	overlap
ENSG00000154310	cg14865094	0.615459	0	0	0.683044	0	0	overlap
ENSG00000154310	cg12354192	0.577849	0	0	0.666219	0	0	overlap
ENSG00000154310	cg18405631	0.460313	9.4745e-08	0.0385805	0.579841	0	0	overlap
ENSG00000154310	cg18052528	0.702661	0	0	0.817976	0	0	overlap
ENSG00000154310	cg18058230	0.637204	0	0	0.729767	0	0	overlap
ENSG00000154310	cg22469804	0.477892	2.63813e-08	0.0107426	0.610764	0	0	overlap
ENSG00000154310	cg02499139	0.55565	0	0	0.565334	0	0	overlap
ENSG00000075651	cg17566735	-0.546568	0	0	-0.448036	0	0	overlap
ENSG00000075651	cg02371119	-0.459748	9.85982e-08	0.0401496	-0.403612	2.23671e-11	9.10796e-06	overlap
ENSG00000181449	cg17894318	0.479994	2.25182e-08	0.0091695	0.337874	3.20187e-08	0.0130382	overlap
ENSG00000181449	cg25109019	0.470218	4.65465e-08	0.0189539	0.366709	1.64634e-09	0.000670396	overlap
ENSG00000181449	cg22920300	0.488289	1.18921e-08	0.0048425	0.381362	3.23156e-10	0.00013159	overlap
ENSG00000090534	cg22957206	-0.471871	4.12434e-08	0.0167945	-0.448872	0	0	overlap
ENSG00000163898	cg23620049	-0.491318	9.36314e-09	0.00381271	-0.561989	0	0	overlap
ENSG00000073792	cg18863486	0.500498	4.4309e-09	0.00180428	0.642568	0	0	overlap
ENSG00000073792	cg16706546	0.500676	4.36525e-09	0.00177755	0.651717	0	0	overlap
ENSG00000073792	cg25127692	0.582267	0	0	0.6364	0	0	overlap
ENSG00000073792	cg21531679	0.464651	6.96031e-08	0.0283427	0.589195	0	0	overlap
ENSG00000073792	cg07437908	0.581579	0	0	0.652004	0	0	overlap
ENSG00000058866	cg25641269	0.633972	0	0	0.678078	0	0	overlap
ENSG00000058866	cg12121643	0.497536	5.66485e-09	0.00230675	0.550275	0	0	overlap
ENSG00000058866	cg15709989	0.565266	0	0	0.48282	0	0	overlap
ENSG00000058866	cg19209799	0.555152	0	0	0.606057	0	0	overlap
ENSG00000058866	cg17293936	0.50459	3.1304e-09	0.00127471	0.464141	0	0	overlap
ENSG00000058866	cg18172135	0.501389	4.11151e-09	0.00167422	0.535249	0	0	overlap
ENSG00000058866	cg24155429	0.484037	1.65426e-08	0.00673621	0.45149	0	0	overlap
ENSG00000058866	cg02478762	0.550667	0	0	0.515566	0	0	overlap
ENSG00000058866	cg02749735	0.475005	3.27266e-08	0.0133264	0.404304	2.04798e-11	8.33945e-06	overlap
ENSG00000058866	cg04391718	0.518427	8.76257e-10	0.000356816	0.536296	0	0	overlap
ENSG00000163923	cg07693270	-0.638673	0	0	-0.595716	0	0	overlap
ENSG00000163923	cg06190677	-0.542759	1.00798e-11	4.10454e-06	-0.604834	0	0	overlap
ENSG00000163923	cg05882938	-0.64679	0	0	-0.678543	0	0	overlap
ENSG00000163923	cg07441272	-0.55361	0	0	-0.610707	0	0	overlap
ENSG00000127241	cg25818109	0.515705	1.14373e-09	0.000465731	0.362038	2.71716e-09	0.00110644	overlap
ENSG00000127241	cg19254514	-0.467318	5.7456e-08	0.0233963	-0.442528	4.3402e-15	1.76735e-09	overlap
ENSG00000127241	cg18140824	-0.471558	4.22024e-08	0.017185	-0.437596	9.02323e-14	3.6743e-08	overlap
ENSG00000163347	cg27177296	-0.508559	2.21161e-09	0.000900575	-0.554102	0	0	overlap
ENSG00000114279	cg17198994	0.472449	3.95298e-08	0.0160967	0.583641	0	0	overlap
ENSG00000184203	cg00494544	-0.499041	5.00263e-09	0.00203709	-0.368031	1.42649e-09	0.000580874	overlap
ENSG00000163959	cg27558485	-0.536135	9.25725e-11	3.76959e-05	-0.5038	0	0	overlap
ENSG00000163959	cg00760562	-0.527072	3.436e-10	0.000139915	-0.562587	0	0	overlap
ENSG00000169026	cg24693053	-0.477192	2.78032e-08	0.0113216	-0.543114	0	0	overlap
ENSG00000169026	cg02096793	-0.517487	9.61809e-10	0.000391653	-0.681081	0	0	overlap
ENSG00000169026	cg07086226	-0.612442	0	0	-0.556241	0	0	overlap
ENSG00000169026	cg05827190	-0.559109	0	0	-0.536567	0	0	overlap
ENSG00000169026	cg17952262	-0.457997	1.11507e-07	0.045406	-0.665783	0	0	overlap
ENSG00000169026	cg13656831	-0.517425	9.67641e-10	0.000394027	-0.645928	0	0	overlap
ENSG00000169026	cg14876761	-0.514974	1.22656e-09	0.000499461	-0.699637	0	0	overlap
ENSG00000168993	cg00633520	0.649641	0	0	0.60141	0	0	overlap
ENSG00000168993	cg04337174	0.523779	5.00921e-10	0.000203977	0.537643	0	0	overlap
ENSG00000174137	cg05144345	-0.532959	1.5719e-10	6.40083e-05	-0.474586	0	0	overlap
ENSG00000174137	cg02357046	-0.56129	0	0	-0.443379	0	0	overlap
ENSG00000068078	cg24979233	-0.532006	1.80807e-10	7.36253e-05	-0.448056	0	0	overlap
ENSG00000068078	cg04742135	-0.559441	0	0	-0.466792	0	0	overlap
ENSG00000068078	cg03262295	-0.477038	2.81245e-08	0.0114524	-0.336701	3.59055e-08	0.0146209	overlap
ENSG00000068078	cg02350535	-0.568086	0	0	-0.499635	0	0	overlap
ENSG00000068078	cg03629948	-0.491711	9.07465e-09	0.00369523	-0.400564	3.28242e-11	1.33662e-05	overlap
ENSG00000068078	cg03860252	-0.566089	0	0	-0.508857	0	0	overlap
ENSG00000068078	cg03874978	-0.458906	1.04614e-07	0.0425994	-0.282131	4.55583e-06	1	fSpecific
ENSG00000068078	cg08145949	-0.578132	0	0	-0.549915	0	0	overlap
ENSG00000068078	cg07680129	-0.581038	0	0	-0.474154	0	0	overlap
ENSG00000068078	cg15697036	-0.604283	0	0	-0.482104	0	0	overlap
ENSG00000159733	cg01998801	0.461198	8.90008e-08	0.0362415	0.421617	1.90772e-12	7.76831e-07	overlap
ENSG00000159733	cg01123739	0.506476	2.65767e-09	0.00108222	0.417496	3.48739e-12	1.42008e-06	overlap
ENSG00000087266	cg00412094	-0.528793	2.78222e-10	0.000113293	-0.46966	0	0	overlap
ENSG00000087266	cg15860235	-0.46937	4.95129e-08	0.0201619	-0.433132	2.64194e-13	1.07581e-07	overlap
ENSG00000087266	cg17749374	-0.497966	5.4678e-09	0.00222651	-0.473327	0	0	overlap
ENSG00000159788	cg20403541	-0.516498	1.05945e-09	0.000431412	-0.528704	0	0	overlap
ENSG00000159788	cg25218793	-0.518814	8.4296e-10	0.000343257	-0.543412	0	0	overlap
ENSG00000159788	cg01109763	-0.53235	1.72024e-10	7.00488e-05	-0.539335	0	0	overlap
ENSG00000109758	cg20533530	-0.697131	0	0	-0.770368	0	0	overlap
ENSG00000109758	cg26900875	-0.689284	0	0	-0.764699	0	0	overlap
ENSG00000109758	cg26955579	-0.621745	0	0	-0.677715	0	0	overlap
ENSG00000109758	cg23922755	-0.729376	0	0	-0.767175	0	0	overlap
ENSG00000109758	cg00344372	-0.666501	0	0	-0.72177	0	0	overlap
ENSG00000109758	cg07364841	-0.748584	0	0	-0.778609	0	0	overlap
ENSG00000109758	cg17322505	-0.700983	0	0	-0.788471	0	0	overlap
ENSG00000175920	cg22853325	0.503853	3.33513e-09	0.00135808	0.31063	4.08257e-07	0.166244	fSpecific
ENSG00000175920	cg04102620	0.460811	9.14718e-08	0.0372477	0.356494	4.87339e-09	0.00198446	overlap
ENSG00000184160	cg25220765	0.525456	4.15028e-10	0.000169001	0.378604	4.42098e-10	0.000180024	overlap
ENSG00000184160	cg01304710	0.490986	9.61322e-09	0.00391454	0.509734	0	0	overlap
ENSG00000184160	cg03222374	0.459084	1.03312e-07	0.0420692	0.256509	3.23575e-05	1	fSpecific
ENSG00000163132	cg26789064	0.5462	0	0	0.384282	2.31076e-10	9.40949e-05	overlap
ENSG00000163132	cg24840099	0.627078	0	0	0.488282	0	0	overlap
ENSG00000163132	cg01785568	0.490839	9.72637e-09	0.00396062	0.489011	0	0	overlap
ENSG00000163132	cg01815567	0.534753	1.18219e-10	4.81391e-05	0.387004	1.68406e-10	6.85755e-05	overlap
ENSG00000163132	cg05334656	0.585186	0	0	0.449756	0	0	overlap
ENSG00000163132	cg03456560	0.547797	0	0	0.475288	0	0	overlap
ENSG00000163132	cg11078084	0.608197	0	0	0.556463	0	0	overlap
ENSG00000163132	cg17814781	0.508221	2.27904e-09	0.000928032	0.524214	0	0	overlap
ENSG00000163132	cg13207326	0.521358	6.49486e-10	0.000264473	0.298026	1.22364e-06	0.49827	fSpecific
ENSG00000173040	cg20988964	0.678562	0	0	0.583462	0	0	overlap
ENSG00000173040	cg20992708	0.686206	0	0	0.644858	0	0	overlap
ENSG00000173040	cg19101433	0.505499	2.89371e-09	0.00117833	0.458544	0	0	overlap
ENSG00000173040	cg20599086	0.761352	0	0	0.660842	0	0	overlap
ENSG00000173040	cg27197503	0.51439	1.29639e-09	0.000527895	0.457017	0	0	overlap
ENSG00000173040	cg01290904	0.465217	6.68397e-08	0.0272174	0.459844	0	0	overlap
ENSG00000173040	cg06669056	0.779607	0	0	0.698718	0	0	overlap
ENSG00000173040	cg06426416	-0.472879	3.82979e-08	0.0155951	-0.400877	3.15686e-11	1.28549e-05	overlap
ENSG00000173040	cg07421005	0.53412	1.3119e-10	5.3421e-05	0.504355	0	0	overlap
ENSG00000173040	cg09301458	0.594845	0	0	0.484038	0	0	overlap
ENSG00000173040	cg17384436	0.607072	0	0	0.514961	0	0	overlap
ENSG00000173040	cg13256598	0.529579	2.5161e-10	0.000102456	0.449483	0	0	overlap
ENSG00000173040	cg14003611	0.461604	8.64805e-08	0.0352152	0.446863	0	0	overlap
ENSG00000072840	cg23239150	0.640614	0	0	0.564509	0	0	overlap
ENSG00000072840	cg26392277	0.760639	0	0	0.662481	0	0	overlap
ENSG00000072840	cg01290904	0.535435	1.05123e-10	4.28063e-05	0.57935	0	0	overlap
ENSG00000072840	cg05582310	0.826464	0	0	0.762338	0	0	overlap
ENSG00000072840	cg04755857	0.828141	0	0	0.686088	0	0	overlap
ENSG00000072840	cg09883987	0.54376	2.08019e-12	8.4706e-07	0.423289	1.47779e-12	6.01762e-07	overlap
ENSG00000072840	cg07421005	0.630378	0	0	0.548691	0	0	overlap
ENSG00000072832	cg23239150	0.469057	5.06541e-08	0.0206266	0.411277	8.23259e-12	3.35234e-06	overlap
ENSG00000072832	cg26392277	0.624221	0	0	0.555268	0	0	overlap
ENSG00000072832	cg05582310	0.670851	0	0	0.631182	0	0	overlap
ENSG00000072832	cg04755857	0.753321	0	0	0.56883	0	0	overlap
ENSG00000074211	cg01253818	0.472086	4.05972e-08	0.0165314	0.370599	1.07773e-09	0.000438857	overlap
ENSG00000074211	cg01839898	0.475896	3.06289e-08	0.0124722	0.382497	2.8379e-10	0.00011556	overlap
ENSG00000074211	cg09674627	0.498224	5.35264e-09	0.00217962	0.46046	0	0	overlap
ENSG00000074211	cg16788014	0.458421	1.08241e-07	0.0440763	0.261967	2.16563e-05	1	fSpecific
ENSG00000163993	cg22266967	-0.539662	4.14615e-11	1.68833e-05	-0.440833	2.54516e-14	1.0364e-08	overlap
ENSG00000163993	cg26233331	-0.629567	0	0	-0.598154	0	0	overlap
ENSG00000163993	cg27027375	-0.546402	0	0	-0.464009	0	0	overlap
ENSG00000163993	cg07210669	-0.624055	0	0	-0.62077	0	0	overlap
ENSG00000163993	cg14900031	-0.477235	2.77138e-08	0.0112852	-0.460053	0	0	overlap
ENSG00000163993	cg14140379	-0.575226	0	0	-0.505754	0	0	overlap
ENSG00000163993	cg14323984	-0.469997	4.73036e-08	0.0192622	-0.408681	1.16209e-11	4.73207e-06	overlap
ENSG00000184985	cg21005218	0.52051	7.09351e-10	0.000288851	0.53883	0	0	overlap
ENSG00000184985	cg23649083	0.468971	5.09718e-08	0.0207559	0.598379	0	0	overlap
ENSG00000184985	cg22357679	0.623392	0	0	0.641027	0	0	overlap
ENSG00000184985	cg19420930	0.484836	1.55553e-08	0.00633416	0.547515	0	0	overlap
[truncated: 20,673 more rows]

## Sheet: LUAD
Ename	Mname	corr.f	corrpval.f	bonf.f	corr.m	corrpval.m	bonf.m	label
ENSG00000187634	cg10827460	-0.37903	2.56458e-09	0.00112166	-0.46931	0	0	overlap
ENSG00000187583	cg23596291	0.382686	1.7574e-09	0.00076863	0.39206	5.38712e-09	0.00235615	overlap
ENSG00000187642	cg23596291	0.376644	3.27376e-09	0.00143184	0.393399	4.73711e-09	0.00207186	overlap
ENSG00000187608	cg03811829	-0.502007	0	0	-0.374503	2.75846e-08	0.0120646	overlap
ENSG00000187608	cg04788999	-0.489101	0	0	-0.317999	2.896e-06	1	fSpecific
ENSG00000187608	cg11211792	-0.507862	0	0	-0.318063	2.88228e-06	1	fSpecific
ENSG00000187608	cg16526047	-0.477597	0	0	-0.293263	1.7035e-05	1	fSpecific
ENSG00000187608	cg20062691	-0.405832	1.4128e-10	6.17913e-05	-0.327206	1.43894e-06	0.629344	fSpecific
ENSG00000188157	cg15840462	0.380354	2.23791e-09	0.000978788	0.121335	0.0793887	1	fSpecific
ENSG00000188157	cg24704476	-0.366806	8.76917e-09	0.00383535	-0.279478	4.28076e-05	1	fSpecific
ENSG00000186891	cg18319381	0.462864	0	0	0.425188	1.82027e-10	7.96129e-05	overlap
ENSG00000186891	cg22696995	-0.361956	1.40826e-08	0.00615929	-0.194655	0.00469893	1	fSpecific
ENSG00000186891	cg23400617	-0.350225	4.2915e-08	0.0187696	-0.26312	0.000120399	1	fSpecific
ENSG00000186827	cg09315878	-0.376972	3.16604e-09	0.00138472	-0.349456	2.41912e-07	0.105805	fSpecific
ENSG00000186827	cg09276842	-0.356425	2.39463e-08	0.0104734	-0.266222	9.9443e-05	1	fSpecific
ENSG00000127054	cg06395167	-0.472458	0	0	-0.442607	2.362e-11	1.03306e-05	overlap
ENSG00000127054	cg16174225	-0.343805	7.75284e-08	0.0339084	-0.326737	1.49194e-06	0.652525	fSpecific
ENSG00000127054	cg18386618	-0.372799	4.83075e-09	0.00211282	-0.296624	1.3511e-05	1	fSpecific
ENSG00000107404	cg13932473	-0.43869	1.97623e-12	8.64341e-07	-0.491712	0	0	overlap
ENSG00000107404	cg17838754	-0.367218	8.42069e-09	0.00368294	-0.470039	0	0	overlap
ENSG00000162576	cg07284273	0.343158	8.22337e-08	0.0359664	0.302345	9.04843e-06	1	fSpecific
ENSG00000162576	cg11414742	0.347909	5.32011e-08	0.0232685	0.408686	1.04255e-09	0.000455976	overlap
ENSG00000162576	cg15472728	0.39459	4.95072e-10	0.000216529	0.398155	2.98478e-09	0.00130545	overlap
ENSG00000162576	cg15386434	0.385215	1.34892e-09	0.000589976	0.275575	5.5105e-05	1	fSpecific
ENSG00000162576	cg14270725	0.355038	2.73137e-08	0.0119462	0.317847	2.9293e-06	1	fSpecific
ENSG00000162576	cg13393580	-0.363254	1.24161e-08	0.00543039	-0.297946	1.23247e-05	1	fSpecific
ENSG00000235098	cg10380643	-0.532587	0	0	-0.412502	7.04411e-10	0.000308087	overlap
ENSG00000235098	cg15081886	-0.69281	0	0	-0.660907	0	0	overlap
ENSG00000235098	cg15633699	-0.659986	0	0	-0.609927	0	0	overlap
ENSG00000235098	cg15823872	-0.478323	0	0	-0.550403	0	0	overlap
ENSG00000235098	cg00060374	-0.54653	0	0	-0.58609	0	0	overlap
ENSG00000235098	cg23894219	-0.71816	0	0	-0.700552	0	0	overlap
ENSG00000205116	cg09368716	-0.525179	0	0	-0.357714	1.20593e-07	0.0527436	fSpecific
ENSG00000205116	cg12208770	-0.437748	2.29471e-12	1.00363e-06	-0.340389	5.08389e-07	0.222353	fSpecific
ENSG00000205116	cg22517356	-0.632376	0	0	-0.398586	2.86155e-09	0.00125155	overlap
ENSG00000205116	cg26863172	-0.500621	0	0	-0.320314	2.43413e-06	1	fSpecific
ENSG00000179403	cg08270205	-0.346633	5.98434e-08	0.0261736	-0.252564	0.000226945	1	fSpecific
ENSG00000179403	cg06786804	-0.339983	1.09591e-07	0.0479316	-0.232903	0.000690217	1	fSpecific
ENSG00000179403	cg09843049	-0.502122	0	0	-0.254867	0.000198061	1	fSpecific
ENSG00000179403	cg21837069	-0.354995	2.74263e-08	0.0119954	-0.19159	0.0054054	1	fSpecific
ENSG00000179403	cg26798702	-0.411753	7.1011e-11	3.10579e-05	-0.289802	2.15633e-05	1	fSpecific
ENSG00000215915	cg04981940	-0.498032	0	0	-0.526761	0	0	overlap
ENSG00000215915	cg10522845	-0.521069	0	0	-0.510439	0	0	overlap
ENSG00000215915	cg17282836	-0.458071	0	0	-0.437115	4.64338e-11	2.03087e-05	overlap
ENSG00000215915	cg24687970	-0.501208	0	0	-0.511601	0	0	overlap
ENSG00000205090	cg09151801	0.361388	1.48794e-08	0.00650778	0.176554	0.0104453	1	fSpecific
ENSG00000228594	cg08289140	-0.342004	9.1313e-08	0.0399374	-0.320434	2.41211e-06	1	fSpecific
ENSG00000008130	cg03606098	-0.453386	3.40056e-14	1.4873e-08	-0.375889	2.43337e-08	0.0106428	overlap
ENSG00000008130	cg02280859	-0.341515	9.54462e-08	0.0417451	-0.265109	0.000106534	1	fSpecific
ENSG00000008130	cg04439557	-0.446749	4.42189e-13	1.93399e-07	-0.3437	3.88639e-07	0.169978	fSpecific
ENSG00000008130	cg05152432	-0.444017	7.80376e-13	3.41311e-07	-0.32344	1.92061e-06	0.840013	fSpecific
ENSG00000008130	cg08122070	-0.451146	1.2505e-13	5.46927e-08	-0.331656	1.01806e-06	0.445268	fSpecific
ENSG00000067606	cg02347356	-0.341611	9.46197e-08	0.0413836	-0.344674	3.58895e-07	0.156969	fSpecific
ENSG00000067606	cg05929117	-0.408991	9.81366e-11	4.29218e-05	-0.368258	4.82105e-08	0.0210857	overlap
ENSG00000067606	cg05463656	-0.448847	2.63004e-13	1.1503e-07	-0.504604	0	0	overlap
ENSG00000067606	cg06315149	-0.437341	2.44515e-12	1.06943e-06	-0.410303	8.83626e-10	0.00038647	overlap
ENSG00000067606	cg06204101	-0.351903	3.66929e-08	0.0160483	-0.333846	8.57011e-07	0.374829	fSpecific
ENSG00000067606	cg07836663	-0.425649	1.27255e-11	5.56572e-06	-0.453471	5.27291e-12	2.3062e-06	overlap
ENSG00000067606	cg08109625	-0.366407	9.12076e-09	0.00398913	-0.41365	6.25263e-10	0.00027347	overlap
ENSG00000067606	cg12639453	-0.420241	2.53811e-11	1.11009e-05	-0.471288	0	0	overlap
ENSG00000067606	cg12391964	-0.339689	1.12527e-07	0.0492158	-0.426598	1.55745e-10	6.81179e-05	overlap
ENSG00000067606	cg17023856	-0.383393	1.63251e-09	0.000714006	-0.414717	5.59433e-10	0.000244678	overlap
ENSG00000067606	cg16599817	-0.440856	1.38151e-12	6.04227e-07	-0.561662	0	0	overlap
ENSG00000067606	cg19619416	-0.398629	3.17742e-10	0.00013897	-0.329164	1.23652e-06	0.540815	fSpecific
ENSG00000067606	cg20285026	-0.55317	0	0	-0.587459	0	0	overlap
ENSG00000067606	cg00328210	-0.4422	1.09283e-12	4.77968e-07	-0.463165	8.28431e-13	3.62329e-07	overlap
ENSG00000067606	cg00866690	-0.458186	0	0	-0.445646	1.59507e-11	6.97632e-06	overlap
ENSG00000067606	cg22366001	-0.446858	4.3145e-13	1.88703e-07	-0.480196	0	0	overlap
ENSG00000067606	cg20975074	-0.451269	1.19063e-13	5.20745e-08	-0.433371	7.22031e-11	3.15793e-05	overlap
ENSG00000067606	cg24447775	-0.494039	0	0	-0.5591	0	0	overlap
ENSG00000067606	cg24776480	-0.460536	0	0	-0.487909	0	0	overlap
ENSG00000157933	cg19404444	-0.36293	1.2813e-08	0.00560402	-0.303724	8.20503e-06	1	fSpecific
ENSG00000157933	cg25139649	-0.34012	1.08241e-07	0.0473411	-0.335722	7.38699e-07	0.323083	fSpecific
ENSG00000116151	cg26876101	-0.380384	2.23087e-09	0.00097571	-0.394031	4.45699e-09	0.00194935	overlap
ENSG00000157916	cg26876101	-0.382626	1.76826e-09	0.000773379	-0.409617	9.48047e-10	0.000414645	overlap
ENSG00000149527	cg04259720	0.380936	2.10718e-09	0.000921614	0.316364	3.27156e-06	1	fSpecific
ENSG00000149527	cg08615111	0.357809	2.09867e-08	0.00917893	0.292241	1.8269e-05	1	fSpecific
ENSG00000149527	cg06824523	0.463969	0	0	0.407724	1.14983e-09	0.000502899	overlap
ENSG00000149527	cg07022634	0.397452	3.61858e-10	0.000158265	0.266357	9.86153e-05	1	fSpecific
ENSG00000149527	cg12140755	0.345221	6.81238e-08	0.0297952	0.290343	2.07864e-05	1	fSpecific
ENSG00000149527	cg13183298	0.493662	0	0	0.474701	0	0	overlap
ENSG00000149527	cg11390151	0.377124	3.11743e-09	0.00136347	0.148255	0.0318372	1	fSpecific
ENSG00000149527	cg15496335	0.465453	0	0	0.395386	3.90932e-09	0.00170981	overlap
ENSG00000149527	cg15627072	0.392141	6.45499e-10	0.00028232	0.204513	0.00295428	1	fSpecific
ENSG00000149527	cg19760917	0.379865	2.35347e-09	0.00102933	0.305806	7.07144e-06	1	fSpecific
ENSG00000149527	cg18023674	0.354484	2.87823e-08	0.0125885	0.243735	0.000378052	1	fSpecific
ENSG00000149527	cg00722329	0.38451	1.45255e-09	0.0006353	0.353148	1.77632e-07	0.0776904	fSpecific
ENSG00000149527	cg22682172	0.465274	0	0	0.400087	2.46861e-09	0.00107969	overlap
ENSG00000149527	cg26857521	0.403193	1.90716e-10	8.34131e-05	0.429182	1.16628e-10	5.10095e-05	overlap
ENSG00000149527	cg26267852	0.414193	5.31364e-11	2.32402e-05	0.301503	9.60352e-06	1	fSpecific
ENSG00000157881	cg10061384	-0.371735	5.37516e-09	0.00235093	-0.237812	0.000527134	1	fSpecific
ENSG00000157881	cg24551418	-0.423949	1.58669e-11	6.93966e-06	-0.3793	1.78237e-08	0.00779554	overlap
ENSG00000157881	cg25037677	-0.419146	2.90807e-11	1.27189e-05	-0.334799	7.94773e-07	0.347608	fSpecific
ENSG00000142606	cg18932078	-0.598791	0	0	-0.577589	0	0	overlap
ENSG00000142611	cg03447135	0.413837	5.5448e-11	2.42512e-05	0.466495	2.62203e-13	1.14679e-07	overlap
ENSG00000142611	cg03401034	0.506387	0	0	0.538646	0	0	overlap
ENSG00000142611	cg03226435	0.616438	0	0	0.572064	0	0	overlap
ENSG00000142611	cg03352346	0.422824	1.83245e-11	8.01456e-06	0.486395	0	0	overlap
ENSG00000142611	cg03885431	0.370076	6.34365e-09	0.00277451	0.381748	1.42247e-08	0.00622144	overlap
ENSG00000142611	cg01932308	0.578357	0	0	0.601857	0	0	overlap
ENSG00000142611	cg02061757	0.34214	9.01955e-08	0.0394486	0.388054	7.88795e-09	0.00344994	overlap
ENSG00000142611	cg03082523	0.660993	0	0	0.58421	0	0	overlap
ENSG00000142611	cg02999781	0.414057	5.4008e-11	2.36214e-05	0.470192	0	0	overlap
ENSG00000142611	cg05712300	0.493511	0	0	0.593029	0	0	overlap
ENSG00000142611	cg05791946	0.409538	9.20869e-11	4.02759e-05	0.521263	0	0	overlap
ENSG00000142611	cg05790380	0.409874	8.85494e-11	3.87287e-05	0.496158	0	0	overlap
ENSG00000142611	cg05375699	0.444707	6.81661e-13	2.98137e-07	0.505964	0	0	overlap
ENSG00000142611	cg05343184	0.615932	0	0	0.713804	0	0	overlap
ENSG00000142611	cg05573412	0.349969	4.39504e-08	0.0192225	0.149453	0.0304696	1	fSpecific
ENSG00000142611	cg06367135	0.373563	4.4733e-09	0.00195648	0.297639	1.25912e-05	1	fSpecific
ENSG00000142611	cg06258549	0.406064	1.37575e-10	6.01711e-05	0.364941	6.45518e-08	0.0282329	overlap
ENSG00000142611	cg06447122	0.681625	0	0	0.597161	0	0	overlap
ENSG00000142611	cg06521247	0.388247	9.79234e-10	0.000428285	0.275969	5.37272e-05	1	fSpecific
ENSG00000142611	cg06099439	0.688486	0	0	0.676958	0	0	overlap
ENSG00000142611	cg04493316	0.5541	0	0	0.588874	0	0	overlap
ENSG00000142611	cg04499214	0.352588	3.44098e-08	0.0150498	0.505988	0	0	overlap
ENSG00000142611	cg04483711	0.599397	0	0	0.550816	0	0	overlap
ENSG00000142611	cg04346637	0.351731	3.72885e-08	0.0163088	0.490651	0	0	overlap
ENSG00000142611	cg05035508	0.350926	4.02003e-08	0.0175823	0.454788	4.2889e-12	1.87583e-06	overlap
ENSG00000142611	cg04988794	0.469561	0	0	0.376211	2.36312e-08	0.0103355	overlap
ENSG00000142611	cg04974499	0.427204	1.03674e-11	4.53436e-06	0.369559	4.29581e-08	0.0187885	overlap
ENSG00000142611	cg05117823	0.382614	1.77047e-09	0.000774347	0.347216	2.9125e-07	0.127383	fSpecific
ENSG00000142611	cg04876124	0.360152	1.6763e-08	0.00733159	0.532189	0	0	overlap
ENSG00000142611	cg07832245	0.408036	1.09633e-10	4.79499e-05	0.563356	0	0	overlap
ENSG00000142611	cg07974025	0.581177	0	0	0.6383	0	0	overlap
ENSG00000142611	cg07956247	0.635743	0	0	0.662422	0	0	overlap
ENSG00000142611	cg08636115	0.533301	0	0	0.504765	0	0	overlap
ENSG00000142611	cg08642716	0.624313	0	0	0.627186	0	0	overlap
ENSG00000142611	cg08247866	0.524523	0	0	0.565807	0	0	overlap
ENSG00000142611	cg06824308	0.672277	0	0	0.677018	0	0	overlap
ENSG00000142611	cg06970772	0.498151	0	0	0.243183	0.000390078	1	fSpecific
ENSG00000142611	cg06659980	0.479483	0	0	0.427576	1.39665e-10	6.1085e-05	overlap
ENSG00000142611	cg06617975	0.569436	0	0	0.560453	0	0	overlap
ENSG00000142611	cg07367222	0.435526	3.22446e-12	1.41028e-06	0.576098	0	0	overlap
ENSG00000142611	cg07109490	0.381617	1.96379e-09	0.000858898	0.469352	0	0	overlap
ENSG00000142611	cg10201191	0.438308	2.10047e-12	9.18679e-07	0.578029	0	0	overlap
ENSG00000142611	cg10391102	0.646379	0	0	0.614548	0	0	overlap
ENSG00000142611	cg10952596	0.585459	0	0	0.615833	0	0	overlap
ENSG00000142611	cg10519004	0.543161	0	0	0.594292	0	0	overlap
ENSG00000142611	cg10520026	0.479895	0	0	0.5952	0	0	overlap
ENSG00000142611	cg10504805	0.690067	0	0	0.608051	0	0	overlap
ENSG00000142611	cg10511255	0.442328	1.06796e-12	4.67093e-07	0.477092	0	0	overlap
ENSG00000142611	cg10442735	0.65482	0	0	0.637164	0	0	overlap
ENSG00000142611	cg10572807	0.446698	4.47392e-13	1.95675e-07	0.526981	0	0	overlap
ENSG00000142611	cg09119863	0.433139	4.57423e-12	2.00062e-06	0.528243	0	0	overlap
ENSG00000142611	cg09032732	0.385412	1.32129e-09	0.00057789	0.53308	0	0	overlap
ENSG00000142611	cg09221035	0.507224	0	0	0.601383	0	0	overlap
ENSG00000142611	cg08865559	0.580416	0	0	0.60132	0	0	overlap
ENSG00000142611	cg08831401	0.451214	1.21748e-13	5.32488e-08	0.47813	0	0	overlap
ENSG00000142611	cg08947445	0.532722	0	0	0.600288	0	0	overlap
ENSG00000142611	cg09509365	0.545971	0	0	0.643544	0	0	overlap
ENSG00000142611	cg12635919	0.484325	0	0	0.455778	3.65117e-12	1.5969e-06	overlap
ENSG00000142611	cg12593511	0.399236	2.97045e-10	0.000129918	0.322268	2.09973e-06	0.918353	fSpecific
ENSG00000142611	cg12268236	0.456132	0	0	0.59207	0	0	overlap
ENSG00000142611	cg13209113	0.507038	0	0	0.349004	2.51175e-07	0.109856	fSpecific
ENSG00000142611	cg13152158	0.510938	0	0	0.594847	0	0	overlap
ENSG00000142611	cg12660813	0.699286	0	0	0.645741	0	0	overlap
ENSG00000142611	cg12804677	0.707826	0	0	0.669808	0	0	overlap
ENSG00000142611	cg12905252	0.490874	0	0	0.57926	0	0	overlap
ENSG00000142611	cg11332505	0.47414	0	0	0.278755	4.48703e-05	1	fSpecific
ENSG00000142611	cg11210422	0.46921	0	0	0.491281	0	0	overlap
ENSG00000142611	cg11837181	0.653156	0	0	0.573206	0	0	overlap
ENSG00000142611	cg14852736	0.453287	3.72977e-14	1.63128e-08	0.578318	0	0	overlap
ENSG00000142611	cg14841011	0.517544	0	0	0.449296	9.71866e-12	4.25063e-06	overlap
ENSG00000142611	cg15059176	0.764734	0	0	0.634688	0	0	overlap
ENSG00000142611	cg14969646	0.564199	0	0	0.525595	0	0	overlap
ENSG00000142611	cg14516243	0.428776	8.39704e-12	3.6726e-06	0.459055	2.04591e-12	8.94813e-07	overlap
ENSG00000142611	cg14522815	0.436087	2.96331e-12	1.29606e-06	0.465762	3.62844e-13	1.58696e-07	overlap
ENSG00000142611	cg14712575	0.397342	3.66271e-10	0.000160195	0.402999	1.84955e-09	0.000808933	overlap
ENSG00000142611	cg14761019	0.531603	0	0	0.594392	0	0	overlap
ENSG00000142611	cg15519786	0.516549	0	0	0.350245	2.26528e-07	0.0990761	fSpecific
ENSG00000142611	cg15386853	0.482814	0	0	0.569728	0	0	overlap
ENSG00000142611	cg15357022	0.342265	8.91807e-08	0.0390048	0.468343	5.67941e-14	2.48399e-08	overlap
ENSG00000142611	cg13460934	0.557549	0	0	0.58698	0	0	overlap
ENSG00000142611	cg13692649	0.515207	0	0	0.543421	0	0	overlap
ENSG00000142611	cg13689309	0.510269	0	0	0.453054	5.62071e-12	2.45832e-06	overlap
ENSG00000142611	cg13789673	0.438695	1.97447e-12	8.63572e-07	0.515893	0	0	overlap
ENSG00000142611	cg13299984	0.624696	0	0	0.538909	0	0	overlap
ENSG00000142611	cg13434489	0.753379	0	0	0.696492	0	0	overlap
ENSG00000142611	cg13388191	0.540006	0	0	0.437124	4.63834e-11	2.02866e-05	overlap
ENSG00000142611	cg14169886	0.55344	0	0	0.615816	0	0	overlap
ENSG00000142611	cg13993877	0.370738	5.93846e-09	0.00259729	0.453168	5.52383e-12	2.41595e-06	overlap
ENSG00000142611	cg17137218	0.679114	0	0	0.645675	0	0	overlap
ENSG00000142611	cg16710099	0.391638	6.81443e-10	0.000298042	0.348375	2.64615e-07	0.115734	fSpecific
ENSG00000142611	cg16926445	0.464444	0	0	0.640774	0	0	overlap
ENSG00000142611	cg17493795	0.431823	5.51514e-12	2.41215e-06	0.358341	1.14294e-07	0.0499885	overlap
ENSG00000142611	cg17286074	0.397439	3.62374e-10	0.000158491	0.517952	0	0	overlap
ENSG00000142611	cg17421241	0.7302	0	0	0.563279	0	0	overlap
ENSG00000142611	cg17412901	0.54711	0	0	0.599234	0	0	overlap
ENSG00000142611	cg17438636	0.387981	1.00732e-09	0.000440569	0.441054	2.87096e-11	1.25567e-05	overlap
ENSG00000142611	cg16002887	0.517898	0	0	0.600872	0	0	overlap
ENSG00000142611	cg16011907	0.343356	8.07668e-08	0.0353248	0.392336	5.24642e-09	0.00229462	overlap
ENSG00000142611	cg16120249	0.567996	0	0	0.586765	0	0	overlap
ENSG00000142611	cg16059167	0.441576	1.2202e-12	5.33675e-07	0.385681	9.86201e-09	0.00431333	overlap
ENSG00000142611	cg15641565	0.585994	0	0	0.660368	0	0	overlap
ENSG00000142611	cg15823330	0.401954	2.19289e-10	9.591e-05	0.484842	0	0	overlap
ENSG00000142611	cg19600583	0.418029	3.33741e-11	1.45967e-05	0.532877	0	0	overlap
ENSG00000142611	cg19704073	0.388217	9.82413e-10	0.000429676	0.31777	2.94608e-06	1	fSpecific
ENSG00000142611	cg19243842	0.616978	0	0	0.604066	0	0	overlap
ENSG00000142611	cg20165545	0.430301	6.81766e-12	2.98183e-06	0.411275	7.99601e-10	0.00034972	overlap
ENSG00000142611	cg19825974	0.521774	0	0	0.512433	0	0	overlap
ENSG00000142611	cg19866637	0.417619	3.50971e-11	1.53504e-05	0.498217	0	0	overlap
ENSG00000142611	cg19904265	0.614678	0	0	0.527131	0	0	overlap
ENSG00000142611	cg17861161	0.61955	0	0	0.570798	0	0	overlap
ENSG00000142611	cg17839324	0.419729	2.70534e-11	1.18323e-05	0.544071	0	0	overlap
ENSG00000142611	cg17940849	0.470488	0	0	0.668034	0	0	overlap
ENSG00000142611	cg17890044	0.374836	3.93345e-09	0.00172036	0.508659	0	0	overlap
ENSG00000142611	cg18396811	0.622689	0	0	0.604097	0	0	overlap
ENSG00000142611	cg00624908	0.558274	0	0	0.50375	0	0	overlap
ENSG00000142611	cg00581154	0.517738	0	0	0.653976	0	0	overlap
ENSG00000142611	cg00790672	0.717069	0	0	0.675737	0	0	overlap
ENSG00000142611	cg00761129	0.394254	5.13489e-10	0.000224583	0.477368	0	0	overlap
ENSG00000142611	cg00774867	0.413052	6.08874e-11	2.66302e-05	0.449199	9.85171e-12	4.30882e-06	overlap
ENSG00000142611	cg00804097	0.637221	0	0	0.600656	0	0	overlap
ENSG00000142611	cg00706913	0.673221	0	0	0.641669	0	0	overlap
ENSG00000142611	cg00701856	0.500545	0	0	0.592628	0	0	overlap
ENSG00000142611	cg00106196	0.619591	0	0	0.498462	0	0	overlap
ENSG00000142611	cg00087546	0.406671	1.28314e-10	5.61205e-05	0.446373	1.44852e-11	6.33537e-06	overlap
ENSG00000142611	cg00109293	0.478777	0	0	0.563763	0	0	overlap
ENSG00000142611	cg00063748	0.528292	0	0	0.475002	0	0	overlap
ENSG00000142611	cg00049709	0.439192	1.82235e-12	7.97037e-07	0.507095	0	0	overlap
ENSG00000142611	cg00329272	0.383165	1.67186e-09	0.00073122	0.388647	7.45723e-09	0.00326156	overlap
ENSG00000142611	cg00168240	0.53447	0	0	0.493727	0	0	overlap
ENSG00000142611	cg00251678	0.633565	0	0	0.517198	0	0	overlap
ENSG00000142611	cg01647724	0.449414	2.23987e-13	9.79649e-08	0.488491	0	0	overlap
ENSG00000142611	cg01448098	0.373849	4.34585e-09	0.00190074	0.355647	1.43802e-07	0.0628944	fSpecific
ENSG00000142611	cg01800445	0.45349	3.05942e-14	1.33809e-08	0.561934	0	0	overlap
ENSG00000142611	cg01713250	0.37608	3.46719e-09	0.00151644	0.442922	2.26943e-11	9.92576e-06	overlap
ENSG00000142611	cg01196079	0.627466	0	0	0.462128	1.07153e-12	4.68651e-07	overlap
ENSG00000142611	cg01104489	0.351618	3.76842e-08	0.0164819	0.400642	2.33708e-09	0.00102216	overlap
ENSG00000142611	cg01046951	0.355302	2.66406e-08	0.0116518	0.53109	0	0	overlap
ENSG00000142611	cg01079872	0.403794	1.78177e-10	7.7929e-05	0.502185	0	0	overlap
ENSG00000142611	cg01062116	0.681158	0	0	0.650919	0	0	overlap
ENSG00000142611	cg01065697	0.520052	0	0	0.562013	0	0	overlap
ENSG00000142611	cg22122862	-0.40584	1.41145e-10	6.17325e-05	-0.449447	9.51593e-12	4.16196e-06	overlap
ENSG00000142611	cg22009660	0.352432	3.49151e-08	0.0152708	0.481427	0	0	overlap
ENSG00000142611	cg22029284	0.365572	9.90017e-09	0.00433002	0.380377	1.61438e-08	0.00706078	overlap
ENSG00000142611	cg22226775	0.697226	0	0	0.672831	0	0	overlap
ENSG00000142611	cg21848084	0.485812	0	0	0.263552	0.000117254	1	fSpecific
ENSG00000142611	cg22608265	0.496709	0	0	0.508879	0	0	overlap
ENSG00000142611	cg22388607	0.429614	7.49196e-12	3.27675e-06	0.449896	8.93114e-12	3.9062e-06	overlap
ENSG00000142611	cg22497969	0.579225	0	0	0.630601	0	0	overlap
ENSG00000142611	cg20790030	-0.37605	3.47763e-09	0.00152101	-0.257298	0.000171333	1	fSpecific
ENSG00000142611	cg20962938	0.347332	5.61115e-08	0.0245414	0.501612	0	0	overlap
ENSG00000142611	cg20387569	0.468326	0	0	0.597328	0	0	overlap
ENSG00000142611	cg20699701	0.446169	5.02959e-13	2.19978e-07	0.310647	4.98366e-06	1	fSpecific
ENSG00000142611	cg21604357	0.434699	3.64567e-12	1.5945e-06	0.489733	0	0	overlap
ENSG00000142611	cg21681320	0.5272	0	0	0.524101	0	0	overlap
ENSG00000142611	cg21160149	0.499045	0	0	0.42666	1.54673e-10	6.76489e-05	overlap
ENSG00000142611	cg24298696	0.59219	0	0	0.489223	0	0	overlap
ENSG00000142611	cg24256745	0.503953	0	0	0.55917	0	0	overlap
ENSG00000142611	cg24395386	0.455653	0	0	0.52682	0	0	overlap
ENSG00000142611	cg24878051	0.697423	0	0	0.660222	0	0	overlap
ENSG00000142611	cg24807850	0.628501	0	0	0.635524	0	0	overlap
ENSG00000142611	cg25052274	0.509089	0	0	0.59533	0	0	overlap
ENSG00000142611	cg24968931	0.418862	3.01196e-11	1.31733e-05	0.472632	0	0	overlap
ENSG00000142611	cg24645149	0.599405	0	0	0.583085	0	0	overlap
ENSG00000142611	cg24642064	0.36924	6.89349e-09	0.00301499	0.498388	0	0	overlap
ENSG00000142611	cg24678113	0.492784	0	0	0.585574	0	0	overlap
ENSG00000142611	cg22862319	0.678535	0	0	0.505943	0	0	overlap
ENSG00000142611	cg23085167	0.429733	7.37165e-12	3.22412e-06	0.515691	0	0	overlap
ENSG00000142611	cg23022057	0.363977	1.15716e-08	0.00506103	0.467196	1.76659e-13	7.72651e-08	overlap
ENSG00000142611	cg23025459	0.389638	8.4441e-10	0.000369318	0.482523	0	0	overlap
ENSG00000142611	cg23050300	0.736615	0	0	0.73373	0	0	overlap
ENSG00000142611	cg24045378	0.383013	1.6985e-09	0.00074287	0.474655	0	0	overlap
ENSG00000142611	cg23999080	0.594638	0	0	0.585154	0	0	overlap
ENSG00000142611	cg23631759	0.387981	1.00732e-09	0.000440569	0.484242	0	0	overlap
ENSG00000142611	cg23738647	0.351753	3.72111e-08	0.0162749	0.50371	0	0	overlap
ENSG00000142611	cg23821340	0.37712	3.11861e-09	0.00136398	0.491602	0	0	overlap
ENSG00000142611	cg26891951	0.647567	0	0	0.660375	0	0	overlap
ENSG00000142611	cg26913155	0.480945	0	0	0.53359	0	0	overlap
ENSG00000142611	cg26864297	0.636391	0	0	0.635305	0	0	overlap
ENSG00000142611	cg26407161	0.455968	0	0	0.452042	6.5441e-12	2.86218e-06	overlap
ENSG00000142611	cg27523417	0.557759	0	0	0.587147	0	0	overlap
ENSG00000142611	cg25480121	0.375883	3.53729e-09	0.0015471	0.422707	2.38804e-10	0.000104445	overlap
ENSG00000142611	cg25411239	0.426955	1.07154e-11	4.68658e-06	0.61384	0	0	overlap
ENSG00000142611	cg25150520	0.604602	0	0	0.617351	0	0	overlap
ENSG00000142611	cg26222332	0.415687	4.43937e-11	1.94164e-05	0.471087	0	0	overlap
ENSG00000142611	cg26153353	0.685088	0	0	0.635827	0	0	overlap
ENSG00000142611	cg25839663	0.364227	1.1292e-08	0.00493878	0.364531	6.69052e-08	0.0292622	overlap
ENSG00000142611	cg25783497	0.521173	0	0	0.569133	0	0	overlap
ENSG00000142611	cg26017484	0.674665	0	0	0.694087	0	0	overlap
ENSG00000142611	cg26044566	0.50015	0	0	0.591387	0	0	overlap
ENSG00000130762	cg22007638	-0.370916	5.83412e-09	0.00255166	-0.414577	5.67677e-10	0.000248284	overlap
ENSG00000162591	cg03448635	0.450736	1.45971e-13	6.38431e-08	0.422231	2.51454e-10	0.000109978	overlap
ENSG00000162591	cg03457400	0.341419	9.62797e-08	0.0421097	0.332184	9.76719e-07	0.427185	fSpecific
ENSG00000162591	cg03328107	0.387507	1.05928e-09	0.000463296	0.313234	4.12384e-06	1	fSpecific
ENSG00000162591	cg02265922	0.416325	4.10921e-11	1.79724e-05	0.380406	1.61015e-08	0.00704227	overlap
ENSG00000162591	cg02955098	0.443053	9.36076e-13	4.09409e-07	0.278254	4.63555e-05	1	fSpecific
ENSG00000162591	cg02959364	0.471452	0	0	0.205797	0.00277674	1	fSpecific
ENSG00000162591	cg02659581	0.416925	3.81999e-11	1.67074e-05	0.310566	5.0134e-06	1	fSpecific
ENSG00000162591	cg05641278	0.391899	6.62576e-10	0.00028979	0.226656	0.000965045	1	fSpecific
ENSG00000162591	cg06438312	0.345363	6.72411e-08	0.0294091	0.367469	5.1692e-08	0.0226084	overlap
ENSG00000162591	cg04549679	0.382	1.88732e-09	0.000825453	0.349157	2.48006e-07	0.10847	fSpecific
ENSG00000162591	cg07830126	0.440959	1.35749e-12	5.93724e-07	0.349895	2.33229e-07	0.102007	fSpecific
ENSG00000162591	cg07720540	0.360588	1.60741e-08	0.00703029	0.365756	6.01021e-08	0.0262867	overlap
ENSG00000162591	cg06791328	0.38042	2.22258e-09	0.000972085	0.339583	5.425e-07	0.237272	fSpecific
ENSG00000162591	cg09230667	0.339898	1.10433e-07	0.0482998	0.312658	4.30191e-06	1	fSpecific
ENSG00000162591	cg12468315	0.370499	6.08149e-09	0.00265985	0.240571	0.000451969	1	fSpecific
ENSG00000162591	cg12427039	0.431263	5.96597e-12	2.60932e-06	0.249798	0.000266794	1	fSpecific
ENSG00000162591	cg12615205	0.372293	5.08249e-09	0.00222292	0.226538	0.000971089	1	fSpecific
ENSG00000162591	cg12302527	0.353954	3.02582e-08	0.013234	0.302186	9.15107e-06	1	fSpecific
ENSG00000162591	cg14421582	0.486799	0	0	0.20579	0.00277778	1	fSpecific
ENSG00000162591	cg14518847	0.375803	3.56598e-09	0.00155965	0.334969	7.84159e-07	0.342966	fSpecific
ENSG00000162591	cg14263070	0.370244	6.23819e-09	0.00272839	0.180518	0.00882028	1	fSpecific
ENSG00000162591	cg13944871	0.461796	0	0	0.334409	8.19685e-07	0.358504	fSpecific
ENSG00000162591	cg17183752	0.37819	2.79551e-09	0.00122267	0.31558	3.46765e-06	1	fSpecific
ENSG00000162591	cg17298788	0.376615	3.28333e-09	0.00143603	0.339165	5.61067e-07	0.245393	fSpecific
ENSG00000162591	cg16043635	0.389529	8.54305e-10	0.000373646	0.356242	1.36716e-07	0.0597953	fSpecific
ENSG00000162591	cg00562088	0.430662	6.48619e-12	2.83685e-06	0.357517	1.22639e-07	0.0536385	fSpecific
ENSG00000162591	cg01519195	0.371182	5.68093e-09	0.00248466	0.350915	2.14209e-07	0.0936884	fSpecific
ENSG00000162591	cg01412518	0.344219	7.46605e-08	0.0326541	0.200621	0.00355719	1	fSpecific
ENSG00000162591	cg01432902	0.367293	8.35872e-09	0.00365584	0.142344	0.0393814	1	fSpecific
ENSG00000162591	cg01215682	0.440397	1.49333e-12	6.53133e-07	0.411818	7.56054e-10	0.000330674	overlap
ENSG00000162591	cg22335847	0.37154	5.48119e-09	0.0023973	0.203714	0.00306996	1	fSpecific
ENSG00000162591	cg22226131	0.465006	0	0	0.388661	7.44717e-09	0.00325716	overlap
ENSG00000162591	cg21811896	0.449203	2.38083e-13	1.0413e-07	0.362717	7.83627e-08	0.0342733	overlap
ENSG00000162591	cg20769487	0.443311	8.92129e-13	3.90189e-07	0.34373	3.87695e-07	0.169565	fSpecific
ENSG00000162591	cg20481720	0.4238	1.61736e-11	7.07384e-06	0.248078	0.000294789	1	fSpecific
ENSG00000162591	cg20451455	0.52339	0	0	0.392407	5.21067e-09	0.00227898	overlap
ENSG00000162591	cg21108519	0.355811	2.53844e-08	0.0111023	0.32354	1.90606e-06	0.833651	fSpecific
ENSG00000162591	cg24536161	0.420546	2.44316e-11	1.06856e-05	0.320315	2.43389e-06	1	fSpecific
ENSG00000162591	cg26786407	0.470627	0	0	0.427483	1.41128e-10	6.17249e-05	overlap
ENSG00000162591	cg26788812	0.421722	2.10744e-11	9.21726e-06	0.392424	5.20226e-09	0.0022753	overlap
ENSG00000162591	cg27637706	0.380213	2.2706e-09	0.000993087	0.266841	9.56995e-05	1	fSpecific
ENSG00000162591	cg27306802	0.395983	4.25191e-10	0.000185965	0.336984	6.68096e-07	0.292204	fSpecific
ENSG00000078900	cg03664527	0.378508	2.70585e-09	0.00118345	0.43235	8.12608e-11	3.55409e-05	overlap
ENSG00000078900	cg05936300	0.340483	1.04765e-07	0.0458206	0.404612	1.57398e-09	0.000688407	overlap
ENSG00000078900	cg06202149	0.398298	3.29596e-10	0.000144155	0.478502	0	0	overlap
ENSG00000078900	cg11523134	0.36586	9.62387e-09	0.00420917	0.509986	0	0	overlap
ENSG00000078900	cg17163168	0.372713	4.87269e-09	0.00213116	0.417828	4.03149e-10	0.000176324	overlap
ENSG00000078900	cg19819912	0.380637	2.17325e-09	0.000950512	0.391359	5.76101e-09	0.00251968	overlap
ENSG00000078900	cg17986341	0.362957	1.27797e-08	0.00558943	0.403432	1.77138e-09	0.000774743	overlap
ENSG00000078900	cg00589002	0.42305	1.78046e-11	7.78717e-06	0.50823	0	0	overlap
ENSG00000078900	cg22234529	0.409897	8.83105e-11	3.86242e-05	0.540308	0	0	overlap
ENSG00000078900	cg24356964	0.360328	1.64817e-08	0.00720858	0.470059	0	0	overlap
ENSG00000078900	cg23052055	0.360787	1.57688e-08	0.00689676	0.39247	5.17966e-09	0.00226542	overlap
ENSG00000078900	cg26105278	0.408389	1.05251e-10	4.60332e-05	0.33008	1.15145e-06	0.503606	fSpecific
ENSG00000130764	cg17855390	-0.353633	3.11871e-08	0.0136403	-0.228709	0.000865183	1	fSpecific
ENSG00000131697	cg00702417	0.344265	7.43462e-08	0.0325166	0.27571	5.463e-05	1	fSpecific
ENSG00000069424	cg00223046	0.38912	8.92374e-10	0.000390296	0.339455	5.48127e-07	0.239733	fSpecific
ENSG00000158286	cg04790574	-0.366754	8.8148e-09	0.00385531	-0.411382	7.90894e-10	0.000345912	overlap
ENSG00000158286	cg18975791	-0.378177	2.79922e-09	0.00122429	-0.415575	5.11351e-10	0.000223649	overlap
ENSG00000158286	cg26907544	-0.394918	4.77678e-10	0.000208921	-0.316426	3.25646e-06	1	fSpecific
ENSG00000116237	cg04790574	-0.353594	3.13042e-08	0.0136914	-0.381096	1.51079e-08	0.00660773	overlap
ENSG00000116237	cg18975791	-0.364864	1.06114e-08	0.00464108	-0.36192	8.39724e-08	0.0367268	overlap
ENSG00000116237	cg26907544	-0.348481	5.0458e-08	0.0220687	-0.272217	6.82809e-05	1	fSpecific
ENSG00000116237	cg26611832	-0.380621	2.17699e-09	0.000952148	-0.362388	8.06344e-08	0.0352669	overlap
ENSG00000158292	cg17742359	0.365235	1.02322e-08	0.00447524	0.357529	1.22517e-07	0.0535851	fSpecific
ENSG00000097021	cg05786314	-0.356362	2.40899e-08	0.0105362	-0.332187	9.7652e-07	0.427099	fSpecific
ENSG00000187017	cg07017737	0.668539	0	0	0.640486	0	0	overlap
ENSG00000187017	cg12406391	0.341512	9.54702e-08	0.0417556	0.254572	0.000201563	1	fSpecific
ENSG00000187017	cg13356427	0.443822	8.10147e-13	3.54332e-07	0.278015	4.70778e-05	1	fSpecific
ENSG00000187017	cg01337514	0.459211	0	0	0.287791	2.46953e-05	1	fSpecific
ENSG00000215788	cg04500986	-0.424986	1.38745e-11	6.06825e-06	-0.410576	8.59282e-10	0.000375822	overlap
ENSG00000215788	cg07017737	0.346176	6.24099e-08	0.0272961	0.337933	6.19339e-07	0.270879	fSpecific
ENSG00000215788	cg10059687	-0.392906	5.94331e-10	0.000259942	-0.332484	9.54029e-07	0.417262	fSpecific
ENSG00000215788	cg16681526	-0.406737	1.2735e-10	5.56987e-05	-0.399403	2.64071e-09	0.00115496	overlap
ENSG00000215788	cg00087884	-0.527034	0	0	-0.471956	0	0	overlap
ENSG00000215788	cg23114616	-0.383309	1.6469e-09	0.000720302	-0.392882	4.97868e-09	0.00217752	overlap
ENSG00000215788	cg26056577	-0.51812	0	0	-0.539673	0	0	overlap
ENSG00000173662	cg09132215	-0.714958	0	0	-0.707246	0	0	overlap
ENSG00000173662	cg00741410	-0.719004	0	0	-0.703831	0	0	overlap
ENSG00000173662	cg24105407	-0.676943	0	0	-0.667023	0	0	overlap
ENSG00000173662	cg23963591	-0.68173	0	0	-0.65208	0	0	overlap
ENSG00000173662	cg27531553	-0.611601	0	0	-0.571979	0	0	overlap
ENSG00000162413	cg07718813	-0.342277	8.90836e-08	0.0389623	-0.19048	0.00568405	1	fSpecific
ENSG00000162413	cg01881062	-0.436969	2.58991e-12	1.13274e-06	-0.335088	7.76787e-07	0.339742	fSpecific
ENSG00000171735	cg16380632	0.361982	1.40474e-08	0.00614386	0.150873	0.0289127	1	fSpecific
ENSG00000171735	cg19697382	-0.340461	1.04974e-07	0.0459124	-0.191976	0.00531142	1	fSpecific
ENSG00000049245	cg12258811	-0.349442	4.61574e-08	0.0201878	-0.206647	0.0026646	1	fSpecific
ENSG00000049245	cg14204433	-0.362522	1.33307e-08	0.00583042	-0.168265	0.0147221	1	fSpecific
ENSG00000049246	cg08764927	-0.362415	1.34702e-08	0.00589143	-0.348266	2.67012e-07	0.116782	fSpecific
ENSG00000049246	cg12258811	-0.455072	0	0	-0.275185	5.6502e-05	1	fSpecific
ENSG00000049246	cg14204433	-0.456399	0	0	-0.356968	1.28525e-07	0.0562128	fSpecific
ENSG00000049249	cg06956444	-0.389923	8.19099e-10	0.000358248	-0.292465	1.79914e-05	1	fSpecific
ENSG00000116288	cg14150803	-0.36535	1.01179e-08	0.00442525	-0.098115	0.156441	1	fSpecific
ENSG00000162426	cg07171527	-0.399244	2.96802e-10	0.000129812	-0.308369	5.87997e-06	1	fSpecific
ENSG00000162426	cg14851757	-0.402559	2.04865e-10	8.96016e-05	-0.314997	3.62072e-06	1	fSpecific
ENSG00000074800	cg04993279	-0.356958	2.27628e-08	0.00995572	-0.274903	5.75345e-05	1	fSpecific
ENSG00000074800	cg10313368	-0.47966	0	0	-0.37529	2.56906e-08	0.0112362	overlap
ENSG00000171621	cg03116948	-0.36435	1.11573e-08	0.00487983	-0.367826	5.00852e-08	0.0219057	overlap
ENSG00000171621	cg06899522	-0.472723	0	0	-0.568144	0	0	overlap
ENSG00000171621	cg12221621	-0.390646	7.5808e-10	0.00033156	-0.419999	3.19866e-10	0.000139899	overlap
ENSG00000171621	cg11413763	-0.341601	9.47068e-08	0.0414217	-0.39187	5.48633e-09	0.00239954	overlap
ENSG00000171621	cg19820919	-0.346493	6.06169e-08	0.0265119	-0.370753	3.86235e-08	0.0168927	overlap
ENSG00000171621	cg25616787	-0.364762	1.07175e-08	0.00468749	-0.361451	8.74529e-08	0.0382491	overlap
ENSG00000171608	cg01943221	-0.361105	1.52919e-08	0.00668818	-0.268189	8.79841e-05	1	fSpecific
ENSG00000171608	cg04340595	-0.384097	1.51679e-09	0.000663395	-0.230368	0.000791588	1	fSpecific
ENSG00000171608	cg04287259	-0.343238	8.16343e-08	0.0357042	-0.235425	0.000601348	1	fSpecific
ENSG00000171608	cg07970040	-0.371678	5.40561e-09	0.00236424	-0.248843	0.000282008	1	fSpecific
ENSG00000171608	cg07499142	-0.366117	9.38396e-09	0.00410424	-0.286153	2.75591e-05	1	fSpecific
ENSG00000171608	cg11947782	-0.350796	4.06924e-08	0.0177976	-0.219091	0.00143148	1	fSpecific
ENSG00000171608	cg12033075	-0.367276	8.37245e-09	0.00366184	-0.301701	9.47002e-06	1	fSpecific
ENSG00000171608	cg18284427	-0.348488	5.04278e-08	0.0220555	-0.0644219	0.352621	1	fSpecific
ENSG00000171608	cg20994801	-0.395401	4.53165e-10	0.0001982	-0.25511	0.000195231	1	fSpecific
ENSG00000171608	cg23098018	-0.373532	4.48708e-09	0.0019625	-0.204857	0.00290582	1	fSpecific
ENSG00000178585	cg11544657	-0.412133	6.78927e-11	2.96941e-05	-0.436666	4.89906e-11	2.14269e-05	overlap
ENSG00000142657	cg03344767	-0.340986	1.00118e-07	0.0437884	-0.377976	2.01216e-08	0.00880055	overlap
ENSG00000142657	cg04909257	-0.510063	0	0	-0.497462	0	0	overlap
ENSG00000130940	cg04896832	-0.345852	6.42921e-08	0.0281193	-0.249721	0.000268003	1	fSpecific
ENSG00000130940	cg07555102	-0.458725	0	0	-0.306657	6.65229e-06	1	fSpecific
ENSG00000130940	cg08885197	-0.444108	7.66696e-13	3.35328e-07	-0.285274	2.92218e-05	1	fSpecific
ENSG00000130940	cg20329303	-0.472249	0	0	-0.305293	7.33607e-06	1	fSpecific
ENSG00000130940	cg01556552	-0.412981	6.13982e-11	2.68536e-05	-0.4021	2.02273e-09	0.000884676	overlap
ENSG00000130940	cg24661860	-0.375659	3.6186e-09	0.00158266	-0.314851	3.66016e-06	1	fSpecific
ENSG00000130940	cg25463742	-0.349501	4.59044e-08	0.0200771	-0.36845	4.73991e-08	0.0207309	overlap
ENSG00000204624	cg10964330	0.463003	0	0	0.375458	2.53016e-08	0.0110661	overlap
ENSG00000204624	cg09018444	-0.470601	0	0	-0.422724	2.38367e-10	0.000104254	overlap
ENSG00000204624	cg08861844	0.469737	0	0	0.300028	1.0654e-05	1	fSpecific
ENSG00000204624	cg09790470	0.490223	0	0	0.339923	5.27872e-07	0.230874	fSpecific
ENSG00000204624	cg12092561	-0.490706	0	0	-0.340387	5.08496e-07	0.2224	fSpecific
ENSG00000204624	cg12808447	0.415173	4.72352e-11	2.06591e-05	0.378531	1.91265e-08	0.00836533	overlap
ENSG00000204624	cg13434312	0.510906	0	0	0.487365	0	0	overlap
ENSG00000204624	cg15658487	-0.485451	0	0	-0.384274	1.12494e-08	0.00492014	overlap
ENSG00000204624	cg01785417	-0.475047	0	0	-0.403555	1.74973e-09	0.000765275	overlap
ENSG00000204624	cg00951310	0.385658	1.28755e-09	0.000563134	0.200723	0.00354	1	fSpecific
ENSG00000204624	cg00857963	0.393314	5.68668e-10	0.000248717	0.244407	0.000363892	1	fSpecific
ENSG00000204624	cg22002075	-0.540332	0	0	-0.326023	1.5762e-06	0.689381	fSpecific
ENSG00000204624	cg20692414	-0.431607	5.68546e-12	2.48664e-06	-0.397413	3.20959e-09	0.00140377	overlap
ENSG00000204624	cg21296749	-0.457362	0	0	-0.370076	4.10277e-08	0.0179442	overlap
ENSG00000116661	cg05796704	-0.662207	0	0	-0.453022	5.64849e-12	2.47047e-06	overlap
ENSG00000116661	cg06848073	-0.391941	6.59612e-10	0.000288493	-0.312117	4.47623e-06	1	fSpecific
ENSG00000116661	cg15746187	-0.401697	2.25711e-10	9.87187e-05	-0.312481	4.35832e-06	1	fSpecific
ENSG00000116661	cg19747992	-0.5358	0	0	-0.400204	2.44037e-09	0.00106734	overlap
ENSG00000116661	cg01420388	-0.577186	0	0	-0.434685	6.19334e-11	2.70877e-05	overlap
ENSG00000116661	cg22697136	-0.628521	0	0	-0.45875	2.16711e-12	9.47823e-07	overlap
ENSG00000116661	cg22450927	-0.441778	1.17764e-12	5.15062e-07	-0.312837	4.24579e-06	1	fSpecific
ENSG00000116661	cg24878594	0.381351	2.01855e-09	0.000882848	0.33292	9.2183e-07	0.403179	fSpecific
ENSG00000116661	cg26829322	-0.416737	3.90832e-11	1.70937e-05	-0.33538	7.59034e-07	0.331977	fSpecific
ENSG00000132879	cg05796704	-0.365862	9.62212e-09	0.00420841	-0.225377	0.00103248	1	fSpecific
ENSG00000132879	cg22697136	-0.36991	6.44905e-09	0.00282061	-0.246672	0.000319667	1	fSpecific
ENSG00000116688	cg09820729	-0.351778	3.71242e-08	0.0162369	-0.299433	1.11079e-05	1	fSpecific
ENSG00000120949	cg07155422	-0.347209	5.67514e-08	0.0248212	-0.152975	0.0267338	1	fSpecific
ENSG00000120949	cg19408626	-0.339662	1.12799e-07	0.0493345	-0.240285	0.000459282	1	fSpecific
ENSG00000028137	cg09557991	-0.415678	4.44433e-11	1.94381e-05	-0.422937	2.32889e-10	0.000101858	overlap
ENSG00000028137	cg00155063	-0.439203	1.81906e-12	7.95601e-07	-0.336314	7.04726e-07	0.308224	fSpecific
ENSG00000028137	cg26189983	-0.402934	1.96374e-10	8.58878e-05	-0.312152	4.46477e-06	1	fSpecific
ENSG00000048707	cg10622644	-0.34996	4.39882e-08	0.019239	-0.285456	2.88709e-05	1	fSpecific
ENSG00000048707	cg00384847	-0.342506	8.72499e-08	0.0381603	-0.30153	9.58509e-06	1	fSpecific
ENSG00000162496	cg16432031	-0.467407	0	0	-0.531037	0	0	overlap
ENSG00000162496	cg23603036	-0.519378	0	0	-0.564609	0	0	overlap
ENSG00000162493	cg21158795	0.452222	7.67963e-14	3.35882e-08	0.366854	5.45681e-08	0.0238663	overlap
ENSG00000189337	cg03388445	0.438738	1.96104e-12	8.57696e-07	0.485358	0	0	overlap
ENSG00000189337	cg05046721	0.486071	0	0	0.39546	3.88142e-09	0.00169761	overlap
ENSG00000189337	cg06887407	0.36611	9.39078e-09	0.00410723	0.331752	1.01044e-06	0.441935	fSpecific
ENSG00000189337	cg07370352	0.481273	0	0	0.507276	0	0	overlap
ENSG00000189337	cg12485744	0.34058	1.03852e-07	0.0454214	0.439991	3.27461e-11	1.43221e-05	overlap
ENSG00000189337	cg12436612	0.341417	9.62958e-08	0.0421167	0.400728	2.31741e-09	0.00101356	overlap
ENSG00000189337	cg14041921	0.376864	3.20116e-09	0.00140008	0.361283	8.87364e-08	0.0388105	overlap
ENSG00000189337	cg16822407	0.404869	1.57688e-10	6.89678e-05	0.448481	1.08844e-11	4.76051e-06	overlap
ENSG00000189337	cg18861119	0.426053	1.2069e-11	5.2786e-06	0.379127	1.81099e-08	0.00792071	overlap
ENSG00000189337	cg01567509	0.348627	4.978e-08	0.0217722	0.244674	0.000358399	1	fSpecific
ENSG00000189337	cg24943198	0.377148	3.10979e-09	0.00136012	0.343627	3.90946e-07	0.170987	fSpecific
ENSG00000189337	cg27538859	0.381214	2.04755e-09	0.000895534	0.364554	6.6769e-08	0.0292026	overlap
ENSG00000116771	cg01540571	-0.34852	5.02769e-08	0.0219895	-0.522804	0	0	overlap
ENSG00000162460	cg01963294	0.353459	3.17046e-08	0.0138666	0.153519	0.0261931	1	fSpecific
ENSG00000162460	cg16626967	-0.36678	8.79155e-09	0.00384514	-0.252689	0.000225272	1	fSpecific
ENSG00000162458	cg17276021	-0.49828	0	0	-0.493936	0	0	overlap
ENSG00000162458	cg19759788	-0.393425	5.61871e-10	0.000245744	-0.424917	1.87535e-10	8.2022e-05	overlap
ENSG00000173641	cg21214613	-0.353406	3.18623e-08	0.0139356	-0.367209	5.28873e-08	0.0231312	overlap
ENSG00000142627	cg03258665	-0.386461	1.18314e-09	0.000517466	-0.370169	4.06884e-08	0.0177958	overlap
ENSG00000142627	cg05797770	-0.459578	0	0	-0.349665	2.3775e-07	0.103984	fSpecific
ENSG00000142627	cg07959609	-0.38882	9.21403e-10	0.000402992	-0.367182	5.30143e-08	0.0231868	overlap
ENSG00000142627	cg09178261	-0.472152	0	0	-0.270338	7.6891e-05	1	fSpecific
ENSG00000142627	cg15146752	-0.526314	0	0	-0.405521	1.43667e-09	0.000628352	overlap
ENSG00000142627	cg21647035	-0.513504	0	0	-0.462982	8.68625e-13	3.79909e-07	overlap
ENSG00000142627	cg26371327	-0.481548	0	0	-0.406448	1.30834e-09	0.000572227	overlap
ENSG00000142623	cg12654045	-0.482947	0	0	-0.329457	1.20869e-06	0.528644	fSpecific
ENSG00000142623	cg24934408	0.424885	1.4059e-11	6.14896e-06	0.456518	3.22543e-12	1.4107e-06	overlap
ENSG00000074964	cg11806633	-0.384738	1.41819e-09	0.000620272	-0.325735	1.61142e-06	0.704785	fSpecific
ENSG00000179023	cg14356550	-0.48437	0	0	-0.377349	2.1307e-08	0.009319	overlap
ENSG00000179023	cg24076588	-0.49211	0	0	-0.372166	3.40412e-08	0.0148885	overlap
ENSG00000179023	cg26684191	0.386695	1.15427e-09	0.000504842	0.366099	5.83171e-08	0.025506	overlap
ENSG00000009709	cg07536847	-0.372463	4.99643e-09	0.00218528	-0.108332	0.117501	1	fSpecific
ENSG00000009709	cg07706053	0.363297	1.23637e-08	0.00540748	0.47175	0	0	overlap
ENSG00000009709	cg08350288	0.433422	4.3917e-12	1.92079e-06	0.430386	1.0176e-10	4.45065e-05	overlap
ENSG00000009709	cg09791440	0.393699	5.45385e-10	0.000238534	0.46953	0	0	overlap
ENSG00000009709	cg09329407	0.390232	7.92479e-10	0.000346605	0.197999	0.00402375	1	fSpecific
ENSG00000009709	cg11428724	-0.345154	6.85403e-08	0.0299773	-0.209379	0.00233156	1	fSpecific
ENSG00000009709	cg15505287	0.356282	2.42748e-08	0.010617	0.174906	0.0111956	1	fSpecific
ENSG00000009709	cg15082028	0.376726	3.24643e-09	0.00141988	0.430917	9.57824e-11	4.18922e-05	overlap
ENSG00000009709	cg17468663	0.384825	1.40532e-09	0.000614643	0.454399	4.56244e-12	1.99547e-06	overlap
ENSG00000009709	cg00794881	0.371346	5.58821e-09	0.0024441	0.37048	3.95767e-08	0.0173096	overlap
ENSG00000009709	cg20786524	0.407933	1.10954e-10	4.85277e-05	0.478584	0	0	overlap
ENSG00000169991	cg04276058	-0.487189	0	0	-0.225927	0.00100293	1	fSpecific
ENSG00000169991	cg10231067	-0.390397	7.78558e-10	0.000340517	-0.188149	0.00631128	1	fSpecific
ENSG00000169991	cg10203842	-0.477037	0	0	-0.342496	4.28657e-07	0.187481	fSpecific
ENSG00000169991	cg09012001	-0.370593	6.02511e-09	0.00263519	-0.257897	0.000165289	1	fSpecific
ENSG00000169991	cg10992634	-0.340733	1.02433e-07	0.0448009	-0.142969	0.0385189	1	fSpecific
ENSG00000169991	cg11186344	-0.437128	2.5271e-12	1.10527e-06	-0.229416	0.000833109	1	fSpecific
ENSG00000162482	cg07447773	-0.399514	2.88032e-10	0.000125976	-0.485311	0	0	overlap
ENSG00000162482	cg07037032	-0.641617	0	0	-0.674817	0	0	overlap
ENSG00000162542	cg06871525	-0.409143	9.64209e-11	4.21714e-05	-0.32952	1.20274e-06	0.52604	fSpecific
ENSG00000162542	cg20993090	-0.38394	1.54178e-09	0.000674326	-0.347471	2.85175e-07	0.124726	fSpecific
ENSG00000169914	cg03134147	-0.354693	2.82195e-08	0.0123423	-0.437473	4.44766e-11	1.94526e-05	overlap
ENSG00000188257	cg13211559	-0.392708	6.07184e-10	0.000265563	-0.212905	0.00195778	1	fSpecific
ENSG00000188257	cg22611120	-0.36739	8.27903e-09	0.00362098	-0.189595	0.00591528	1	fSpecific
ENSG00000187980	cg03167763	-0.438139	2.1576e-12	9.43664e-07	-0.454487	4.49924e-12	1.96782e-06	overlap
ENSG00000187980	cg06911113	-0.366397	9.12989e-09	0.00399312	-0.466771	2.27334e-13	9.94286e-08	overlap
ENSG00000187980	cg19696441	-0.372362	5.04771e-09	0.0022077	-0.457715	2.61875e-12	1.14536e-06	overlap
ENSG00000187980	cg24479524	-0.360501	1.62093e-08	0.00708945	-0.446083	1.50554e-11	6.58473e-06	overlap
ENSG00000162545	cg08398233	-0.357476	2.16644e-08	0.00947533	-0.41628	4.74825e-10	0.000207673	overlap
ENSG00000162545	cg22214335	-0.39777	3.49388e-10	0.000152811	-0.361671	8.58015e-08	0.0375268	overlap
ENSG00000117298	cg00228796	-0.388353	9.68327e-10	0.000423515	-0.401328	2.18382e-09	0.000955131	overlap
ENSG00000162551	cg07142010	0.382485	1.79447e-09	0.000784845	0.284001	3.18017e-05	1	fSpecific
ENSG00000162551	cg16270485	0.427297	1.02394e-11	4.47839e-06	0.294534	1.56106e-05	1	fSpecific
ENSG00000133216	cg04099056	0.400851	2.48148e-10	0.000108532	0.399669	2.57256e-09	0.00112516	overlap
ENSG00000133216	cg05228361	0.4096	9.1424e-11	3.99859e-05	0.435127	5.8798e-11	2.57164e-05	overlap
ENSG00000133216	cg05229416	0.360113	1.68273e-08	0.00735971	0.368605	4.67509e-08	0.0204474	overlap
ENSG00000204219	cg00463859	-0.444743	6.7677e-13	2.95997e-07	-0.36644	5.65962e-08	0.0247533	overlap
ENSG00000117318	cg13977835	-0.414733	4.98038e-11	2.17826e-05	-0.494505	0	0	overlap
ENSG00000117318	cg18150584	-0.365907	9.58029e-09	0.00419011	-0.300435	1.03538e-05	1	fSpecific
ENSG00000117318	cg27518976	-0.433692	4.22358e-12	1.84726e-06	-0.428569	1.24963e-10	5.4655e-05	overlap
ENSG00000117308	cg07167185	-0.397394	3.64151e-10	0.000159268	-0.329782	1.17849e-06	0.515433	fSpecific
ENSG00000117308	cg08733957	-0.465128	0	0	-0.358704	1.10795e-07	0.0484584	overlap
ENSG00000179163	cg04460567	-0.485301	0	0	-0.347004	2.9637e-07	0.129623	fSpecific
ENSG00000179163	cg05160751	-0.420095	2.58478e-11	1.1305e-05	-0.281451	3.76268e-05	1	fSpecific
ENSG00000179163	cg08896387	-0.455269	0	0	-0.311847	4.56545e-06	1	fSpecific
ENSG00000179163	cg16906859	-0.431472	5.7941e-12	2.53416e-06	-0.288925	2.28802e-05	1	fSpecific
ENSG00000179163	cg26873754	-0.416125	4.20998e-11	1.84131e-05	-0.268487	8.63601e-05	1	fSpecific
ENSG00000188822	cg03750587	-0.398816	3.11204e-10	0.000136111	-0.192347	0.0052226	1	fSpecific
ENSG00000188822	cg16679650	-0.339779	1.11614e-07	0.0488165	-0.264318	0.000111863	1	fSpecific
ENSG00000188822	cg24672624	-0.363246	1.2425e-08	0.0054343	-0.273941	6.11835e-05	1	fSpecific
ENSG00000188822	cg26151675	-0.371482	5.51273e-09	0.00241109	-0.238657	0.000502967	1	fSpecific
ENSG00000189266	cg05801374	-0.421396	2.196e-11	9.60458e-06	-0.386527	9.1088e-09	0.0039839	overlap
ENSG00000188529	cg05801374	-0.366262	9.25188e-09	0.00404648	-0.310943	4.87743e-06	1	fSpecific
ENSG00000142677	cg09152089	-0.359459	1.79191e-08	0.00783725	-0.317427	3.0226e-06	1	fSpecific
ENSG00000142677	cg25946374	-0.344624	7.19436e-08	0.0314658	-0.366772	5.4968e-08	0.0240413	overlap
ENSG00000185436	cg08700651	-0.448211	3.11241e-13	1.36127e-07	-0.423568	2.1741e-10	9.5088e-05	overlap
ENSG00000185436	cg26835312	-0.446998	4.17763e-13	1.82716e-07	-0.375188	2.59298e-08	0.0113409	overlap
ENSG00000158055	cg06376426	-0.39936	2.92986e-10	0.000128143	-0.349111	2.48942e-07	0.108879	fSpecific
ENSG00000158055	cg11709405	-0.453339	3.55672e-14	1.55559e-08	-0.487513	0	0	overlap
ENSG00000158055	cg13987674	-0.468629	0	0	-0.399815	2.53572e-09	0.00110904	overlap
ENSG00000001461	cg22675447	-0.398389	3.26276e-10	0.000142703	-0.313048	4.18041e-06	1	fSpecific
ENSG00000184454	cg20433521	-0.36983	6.50088e-09	0.00284328	-0.387807	8.07359e-09	0.00353113	overlap
ENSG00000020633	cg05656688	-0.391256	7.10013e-10	0.000310537	-0.228266	0.000885887	1	fSpecific
ENSG00000020633	cg06037693	-0.384952	1.38677e-09	0.000606528	-0.232229	0.000715926	1	fSpecific
ENSG00000020633	cg04907595	0.358515	1.96173e-08	0.00857999	0.283604	3.26478e-05	1	fSpecific
ENSG00000020633	cg19774846	-0.378298	2.76469e-09	0.00120919	-0.313419	4.068e-06	1	fSpecific
ENSG00000157978	cg21452808	-0.354157	2.96857e-08	0.0129836	-0.269238	8.23958e-05	1	fSpecific
ENSG00000117640	cg02490185	-0.352828	3.36417e-08	0.0147138	-0.234005	0.000649977	1	fSpecific
ENSG00000117640	cg13876650	-0.354843	2.78226e-08	0.0121687	-0.352948	1.8064e-07	0.079006	fSpecific
ENSG00000182749	cg10235849	-0.375875	3.54028e-09	0.00154841	-0.467248	1.70722e-13	7.46683e-08	overlap
ENSG00000175087	cg17493193	-0.343434	8.01911e-08	0.035073	-0.316989	3.12295e-06	1	fSpecific
ENSG00000142675	cg09890400	-0.386205	1.21554e-09	0.000531637	-0.270812	7.46262e-05	1	fSpecific
ENSG00000142675	cg13553204	-0.430473	6.65771e-12	2.91187e-06	-0.287302	2.55185e-05	1	fSpecific
ENSG00000176092	cg09279616	0.448642	2.78037e-13	1.21604e-07	0.494991	0	0	overlap
ENSG00000176092	cg14517454	0.377352	3.04559e-09	0.00133204	0.415987	4.89686e-10	0.000214173	overlap
ENSG00000176092	cg24004139	0.491034	0	0	0.388888	7.28886e-09	0.00318792	overlap
ENSG00000117682	cg05304531	-0.368516	7.40668e-09	0.00323944	-0.334062	8.42493e-07	0.36848	fSpecific
ENSG00000117682	cg26108329	-0.378565	2.68998e-09	0.00117651	-0.286115	2.76283e-05	1	fSpecific
ENSG00000175793	cg02242572	-0.427005	1.06447e-11	4.65565e-06	-0.337325	6.5017e-07	0.284363	fSpecific
ENSG00000175793	cg13235717	-0.38994	8.17643e-10	0.000357611	-0.416348	4.71403e-10	0.000206177	overlap
ENSG00000175793	cg16549596	-0.357339	2.19511e-08	0.00960069	-0.367826	5.00852e-08	0.0219057	overlap
ENSG00000090273	cg16177693	-0.350032	4.3694e-08	0.0191104	-0.287322	2.54853e-05	1	fSpecific
ENSG00000131910	cg07914457	-0.433515	4.33289e-12	1.89507e-06	-0.370823	3.83831e-08	0.0167875	overlap
ENSG00000131910	cg06650260	-0.624196	0	0	-0.687787	0	0	overlap
ENSG00000131910	cg10055471	-0.72075	0	0	-0.750292	0	0	overlap
ENSG00000131910	cg16985652	-0.395125	4.67006e-10	0.000204254	-0.331928	9.96577e-07	0.435871	fSpecific
ENSG00000131910	cg24580782	-0.730607	0	0	-0.773543	0	0	overlap
ENSG00000175707	cg16574155	-0.391795	6.70008e-10	0.00029304	-0.273948	6.11582e-05	1	fSpecific
ENSG00000175707	cg19125999	-0.437782	2.28243e-12	9.98262e-07	-0.187278	0.00656103	1	fSpecific
ENSG00000175707	cg21921474	-0.389107	8.93606e-10	0.000390835	-0.362674	7.86543e-08	0.0344009	overlap
ENSG00000253368	cg19712813	-0.460298	0	0	-0.532617	0	0	overlap
ENSG00000090020	cg09725874	-0.342042	9.1e-08	0.0398005	-0.391548	5.65771e-09	0.0024745	overlap
ENSG00000090020	cg18594482	-0.397429	3.62744e-10	0.000158653	-0.362931	7.69201e-08	0.0336424	overlap
ENSG00000090020	cg22481448	-0.376636	3.27654e-09	0.00143305	-0.304081	7.99878e-06	1	fSpecific
ENSG00000142765	cg04886221	-0.384829	1.40478e-09	0.000614404	-0.452358	6.24296e-12	2.73047e-06	overlap
ENSG00000142765	cg06745704	-0.383888	1.5503e-09	0.000678052	-0.454605	4.41576e-12	1.93131e-06	overlap
ENSG00000142748	cg16400794	0.346796	5.89488e-08	0.0257823	0.239108	0.000490492	1	fSpecific
ENSG00000174950	cg10785977	-0.439379	1.76773e-12	7.73147e-07	-0.192337	0.00522507	1	fSpecific
ENSG00000174950	cg10961604	-0.362529	1.33223e-08	0.00582676	-0.28193	3.646e-05	1	fSpecific
ENSG00000174950	cg16400794	-0.390575	7.63888e-10	0.0003341	-0.294568	1.55744e-05	1	fSpecific
ENSG00000174950	cg19719807	-0.374984	3.87496e-09	0.00169478	-0.312242	4.43518e-06	1	fSpecific
ENSG00000174950	cg24932660	-0.397092	3.76475e-10	0.000164658	-0.319356	2.616e-06	1	fSpecific
ENSG00000126705	cg10364249	-0.399794	2.79195e-10	0.000122111	-0.238529	0.000506569	1	fSpecific
ENSG00000126705	cg13373315	-0.360471	1.62556e-08	0.0071097	-0.202985	0.00317889	1	fSpecific
ENSG00000126705	cg23613162	-0.339602	1.13409e-07	0.0496017	-0.410186	8.9438e-10	0.000391173	overlap
ENSG00000060656	cg02293852	0.426719	1.10552e-11	4.8352e-06	0.340139	5.18747e-07	0.226883	fSpecific
ENSG00000060656	cg05673731	-0.346048	6.31509e-08	0.0276202	-0.427483	1.41128e-10	6.17249e-05	overlap
ENSG00000060656	cg05694921	0.447446	3.76105e-13	1.64496e-07	0.443603	2.08054e-11	9.09961e-06	overlap
ENSG00000060656	cg08527313	0.341276	9.75268e-08	0.0426551	0.250354	0.000258293	1	fSpecific
ENSG00000060656	cg11336887	0.382249	1.83901e-09	0.000804322	0.489109	0	0	overlap
ENSG00000060656	cg13466456	0.418238	3.25279e-11	1.42267e-05	0.332352	9.63985e-07	0.421616	fSpecific
ENSG00000060656	cg14030258	0.414624	5.04608e-11	2.20699e-05	0.303713	8.21108e-06	1	fSpecific
ENSG00000060656	cg17592853	0.361795	1.43051e-08	0.00625658	0.371882	3.49176e-08	0.0152719	overlap
ENSG00000060656	cg00914222	0.385647	1.28905e-09	0.000563791	0.305849	7.0498e-06	1	fSpecific
ENSG00000060656	cg01115565	0.376133	3.44833e-09	0.00150819	0.450685	7.97927e-12	3.48988e-06	overlap
ENSG00000060656	cg21787390	0.393643	5.48732e-10	0.000239998	0.531689	0	0	overlap
ENSG00000121766	cg01414687	-0.394903	4.78449e-10	0.000209258	-0.326099	1.56697e-06	0.685341	fSpecific
ENSG00000121769	cg07345934	-0.341495	9.56139e-08	0.0418185	-0.192273	0.0052402	1	fSpecific
ENSG00000168528	cg25938569	-0.371645	5.42366e-09	0.00237214	-0.342207	4.38835e-07	0.191932	fSpecific
ENSG00000142910	cg03314569	-0.482538	0	0	-0.525198	0	0	overlap
ENSG00000142910	cg10823804	-0.44458	6.99049e-13	3.05742e-07	-0.45337	5.35548e-12	2.34232e-06	overlap
ENSG00000142910	cg09070415	-0.365934	9.55423e-09	0.00417872	-0.285421	2.89383e-05	1	fSpecific
ENSG00000142910	cg15120085	-0.433881	4.10953e-12	1.79738e-06	-0.447283	1.28202e-11	5.60714e-06	overlap
ENSG00000142910	cg15079885	-0.396605	3.97187e-10	0.000173717	-0.417078	4.36479e-10	0.000190902	overlap
ENSG00000142910	cg00541683	-0.36549	9.98038e-09	0.0043651	-0.300317	1.044e-05	1	fSpecific
ENSG00000084636	cg25621182	0.460703	0	0	0.572216	0	0	overlap
ENSG00000121753	cg08042273	0.38683	1.13793e-09	0.000497692	0.298758	1.16453e-05	1	fSpecific
ENSG00000121753	cg10575369	0.363294	1.2367e-08	0.00540894	0.38699	8.72078e-09	0.00381419	overlap
ENSG00000121753	cg11790699	0.386355	1.19648e-09	0.000523304	0.502891	0	0	overlap
ENSG00000121753	cg20975182	0.413423	5.82515e-11	2.54774e-05	0.440875	2.93554e-11	1.28391e-05	overlap
ENSG00000084652	cg23972298	-0.352181	3.57484e-08	0.0156352	-0.0713401	0.303235	1	fSpecific
ENSG00000182866	cg07571745	-0.536555	0	0	-0.395949	3.70165e-09	0.00161898	overlap
ENSG00000182866	cg07033820	0.541331	0	0	0.490721	0	0	overlap
ENSG00000182866	cg09942999	0.468936	0	0	0.562996	0	0	overlap
ENSG00000182866	cg10994944	0.351658	3.7541e-08	0.0164192	0.415226	5.30391e-10	0.000231976	overlap
ENSG00000182866	cg11683242	-0.559771	0	0	-0.495335	0	0	overlap
ENSG00000182866	cg14843030	-0.437134	2.52493e-12	1.10432e-06	-0.327076	1.45339e-06	0.635668	fSpecific
ENSG00000182866	cg17078393	-0.537849	0	0	-0.540382	0	0	overlap
ENSG00000182866	cg01804679	0.457742	0	0	0.590293	0	0	overlap
ENSG00000175130	cg00292107	-0.498005	0	0	-0.277807	4.77184e-05	1	fSpecific
ENSG00000273274	cg02906823	0.345557	6.60607e-08	0.0288929	0.265771	0.00010226	1	fSpecific
ENSG00000273274	cg10201297	-0.387468	1.06365e-09	0.000465206	-0.341719	4.56571e-07	0.19969	fSpecific
ENSG00000273274	cg09352844	0.36608	9.41898e-09	0.00411956	0.414856	5.51379e-10	0.000241155	overlap
ENSG00000273274	cg12419176	0.450967	1.34011e-13	5.86121e-08	0.382058	1.38227e-08	0.00604561	overlap
ENSG00000273274	cg00987080	-0.387769	1.0302e-09	0.000450578	-0.27528	5.61602e-05	1	fSpecific
ENSG00000162522	cg05590196	-0.449516	2.17358e-13	9.50655e-08	-0.301544	9.57545e-06	1	fSpecific
ENSG00000162522	cg22048405	-0.486578	0	0	-0.443552	2.09407e-11	9.15878e-06	overlap
ENSG00000162522	cg25850629	-0.452385	7.02216e-14	3.07127e-08	-0.565645	0	0	overlap
ENSG00000121900	cg06179485	-0.342056	9.08857e-08	0.0397505	-0.208744	0.0024054	1	fSpecific
ENSG00000004455	cg11254053	-0.391641	6.8124e-10	0.000297953	-0.269677	8.01548e-05	1	fSpecific
ENSG00000004455	cg01481000	-0.359188	1.83914e-08	0.0080438	-0.340266	5.13463e-07	0.224572	fSpecific
ENSG00000121904	cg03850711	0.344293	7.41519e-08	0.0324317	0.242776	0.00039917	1	fSpecific
ENSG00000121904	cg19807706	0.407814	1.12482e-10	4.91961e-05	0.41462	5.65146e-10	0.000247177	overlap
ENSG00000189280	cg17102325	0.351448	3.82887e-08	0.0167462	0.36758	5.11861e-08	0.0223872	overlap
ENSG00000189280	cg01333788	-0.575477	0	0	-0.555663	0	0	overlap
ENSG00000189280	cg27632959	-0.527157	0	0	-0.499279	0	0	overlap
ENSG00000189280	cg25373430	-0.366076	9.4224e-09	0.00412106	-0.337746	6.28653e-07	0.274953	fSpecific
ENSG00000189280	cg25732104	-0.665895	0	0	-0.556199	0	0	overlap
ENSG00000189433	cg01333788	-0.343447	8.00967e-08	0.0350317	-0.370229	4.0473e-08	0.0177016	overlap
ENSG00000189433	cg27632959	-0.342076	9.07184e-08	0.0396773	-0.315642	3.45169e-06	1	fSpecific
ENSG00000189433	cg25732104	-0.393407	5.62942e-10	0.000246213	-0.362546	7.95355e-08	0.0347863	overlap
ENSG00000188910	cg06375539	-0.402919	1.96702e-10	8.60313e-05	-0.543458	0	0	overlap
ENSG00000188910	cg04370730	-0.350106	4.33942e-08	0.0189792	-0.372691	3.24759e-08	0.0142039	overlap
ENSG00000188910	cg08650784	0.492503	0	0	0.392227	5.30148e-09	0.0023187	overlap
ENSG00000188910	cg09475813	0.376734	3.24398e-09	0.00141881	0.307224	6.3867e-06	1	fSpecific
ENSG00000188910	cg00492873	-0.421751	2.09982e-11	9.18396e-06	-0.400849	2.28966e-09	0.00100143	overlap
ENSG00000163867	cg00483992	-0.355727	2.55879e-08	0.0111913	-0.290923	1.99849e-05	1	fSpecific
ENSG00000116819	cg05845757	-0.52837	0	0	-0.336569	6.90547e-07	0.302023	fSpecific
ENSG00000116819	cg14962509	-0.482706	0	0	-0.342568	4.26181e-07	0.186398	fSpecific
ENSG00000116819	cg17474422	-0.549141	0	0	-0.377689	2.06572e-08	0.0090348	overlap
ENSG00000214193	cg02865595	-0.398435	3.24612e-10	0.000141975	-0.4893	0	0	overlap
ENSG00000214193	cg10622536	-0.343416	8.03262e-08	0.0351321	-0.415896	4.94378e-10	0.000216225	overlap
ENSG00000214193	cg19373545	-0.507847	0	0	-0.553451	0	0	overlap
ENSG00000214193	cg21418854	-0.48252	0	0	-0.517504	0	0	overlap
ENSG00000119535	cg09088576	-0.726462	0	0	-0.713699	0	0	overlap
ENSG00000119535	cg13084345	-0.703229	0	0	-0.666255	0	0	overlap
ENSG00000119535	cg11674933	-0.737851	0	0	-0.741386	0	0	overlap
ENSG00000119535	cg14523574	-0.61341	0	0	-0.566202	0	0	overlap
ENSG00000119535	cg16122427	-0.702684	0	0	-0.671634	0	0	overlap
ENSG00000163873	cg13052954	0.351522	3.80214e-08	0.0166293	0.245546	0.000340987	1	fSpecific
ENSG00000163873	cg23715749	0.355278	2.6699e-08	0.0116773	0.174469	0.0114021	1	fSpecific
ENSG00000163877	cg25597055	-0.464036	0	0	-0.266777	9.60778e-05	1	fSpecific
ENSG00000163879	cg11397548	-0.35772	2.11673e-08	0.0092579	-0.321607	2.20758e-06	0.965525	fSpecific
ENSG00000163879	cg14830003	-0.52645	0	0	-0.599593	0	0	overlap
ENSG00000163879	cg16109423	-0.479411	0	0	-0.498337	0	0	overlap
ENSG00000163879	cg21488617	-0.467615	0	0	-0.461439	1.25475e-12	5.48786e-07	overlap
ENSG00000163879	cg21171625	-0.522921	0	0	-0.579317	0	0	overlap
ENSG00000183317	cg04622024	0.373664	4.42808e-09	0.0019367	0.417713	4.08109e-10	0.000178494	overlap
ENSG00000183317	cg08134680	0.382594	1.77422e-09	0.000775987	0.53679	0	0	overlap
ENSG00000183317	cg11664987	0.378611	2.67751e-09	0.00117106	0.471244	0	0	overlap
ENSG00000183317	cg24375409	0.382031	1.88117e-09	0.000822763	0.476697	0	0	overlap
ENSG00000185090	cg12900583	-0.346154	6.25372e-08	0.0273518	-0.383908	1.16394e-08	0.00509069	overlap
ENSG00000185090	cg24709531	0.390383	7.79793e-10	0.000341057	0.436152	5.20847e-11	2.27802e-05	overlap
ENSG00000116983	cg06357371	0.386662	1.15834e-09	0.00050662	0.210475	0.00220891	1	fSpecific
ENSG00000116983	cg24733934	0.444468	7.14679e-13	3.12578e-07	0.221829	0.00124291	1	fSpecific
ENSG00000116983	cg25375186	0.440441	1.48221e-12	6.48273e-07	0.128973	0.0621325	1	fSpecific
ENSG00000049089	cg24686358	-0.343274	8.13738e-08	0.0355903	-0.146141	0.0343808	1	fSpecific
ENSG00000187815	cg05657805	-0.464165	0	0	-0.385178	1.03376e-08	0.00452134	overlap
ENSG00000187815	cg04203077	-0.437958	2.22024e-12	9.71061e-07	-0.361626	8.6139e-08	0.0376745	overlap
ENSG00000187815	cg15123035	-0.444992	6.43733e-13	2.81548e-07	-0.33619	7.11736e-07	0.31129	fSpecific
ENSG00000187815	cg14198472	-0.489158	0	0	-0.394403	4.29978e-09	0.00188058	overlap
ENSG00000187815	cg16140432	-0.421354	2.20753e-11	9.65503e-06	-0.321865	2.16488e-06	0.94685	fSpecific
ENSG00000187815	cg16658130	-0.444915	6.53797e-13	2.8595e-07	-0.318353	2.82036e-06	1	fSpecific
ENSG00000187815	cg01757525	-0.438744	1.959e-12	8.56805e-07	-0.347879	2.75713e-07	0.120588	fSpecific
ENSG00000187815	cg22024760	-0.512845	0	0	-0.359284	1.05411e-07	0.0461035	overlap
ENSG00000117013	cg26520930	-0.361228	1.51113e-08	0.00660919	-0.232422	0.000708471	1	fSpecific
ENSG00000179862	cg13150171	-0.376256	3.40547e-09	0.00148944	-0.313379	4.08004e-06	1	fSpecific
ENSG00000179862	cg26834479	-0.339923	1.10185e-07	0.0481914	-0.394726	4.16772e-09	0.00182283	overlap
ENSG00000171793	cg19358202	-0.363561	1.20505e-08	0.00527051	-0.0936471	0.176251	1	fSpecific
ENSG00000171790	cg19358202	-0.359675	1.75504e-08	0.00767598	-0.281714	3.69823e-05	1	fSpecific
ENSG00000204060	cg19309616	0.351418	3.83947e-08	0.0167926	0.330702	1.09691e-06	0.479754	fSpecific
ENSG00000197273	cg05398883	-0.361543	1.46575e-08	0.00641074	-0.270005	7.85198e-05	1	fSpecific
ENSG00000197273	cg13452215	-0.396607	3.97066e-10	0.000173664	-0.325362	1.65824e-06	0.725261	fSpecific
ENSG00000197273	cg18856261	-0.362888	1.28661e-08	0.00562723	-0.211308	0.00211966	1	fSpecific
ENSG00000198815	cg02493217	-0.352926	3.33333e-08	0.0145789	-0.247099	0.000311901	1	fSpecific
ENSG00000127125	cg01664124	-0.373997	4.28185e-09	0.00187275	-0.252373	0.000229501	1	fSpecific
ENSG00000186409	cg06363865	-0.372921	4.77184e-09	0.00208705	-0.386403	9.21595e-09	0.00403076	overlap
ENSG00000186409	cg08625842	-0.420024	2.60782e-11	1.14058e-05	-0.316663	3.19951e-06	1	fSpecific
ENSG00000117394	cg05802386	-0.385601	1.29534e-09	0.00056654	-0.518303	0	0	overlap
ENSG00000117394	cg16738646	-0.34829	5.13598e-08	0.0224631	-0.250797	0.000251699	1	fSpecific
ENSG00000117394	cg00737593	-0.450205	1.75265e-13	7.66552e-08	-0.514019	0	0	overlap
ENSG00000117394	cg22025263	-0.441466	1.24383e-12	5.44013e-07	-0.48425	0	0	overlap
ENSG00000179178	cg08039576	-0.362153	1.38164e-08	0.00604285	-0.295746	1.43587e-05	1	fSpecific
ENSG00000253313	cg01413566	-0.357279	2.20772e-08	0.00965588	-0.288918	2.28902e-05	1	fSpecific
ENSG00000066056	cg03971454	-0.531601	0	0	-0.445413	1.64481e-11	7.19386e-06	overlap
ENSG00000066056	cg10965178	-0.39634	4.08881e-10	0.000178832	-0.353796	1.68194e-07	0.0735626	fSpecific
ENSG00000066056	cg08928753	-0.479924	0	0	-0.390065	6.51816e-09	0.00285084	overlap
ENSG00000066056	cg12739119	-0.381274	2.03485e-09	0.000889978	-0.380541	1.59028e-08	0.00695537	overlap
ENSG00000066056	cg13470063	-0.384642	1.43256e-09	0.000626557	-0.317122	3.09203e-06	1	fSpecific
ENSG00000066056	cg18175779	-0.416858	3.85153e-11	1.68454e-05	-0.32851	1.30093e-06	0.568986	fSpecific
ENSG00000142949	cg21268658	-0.352798	3.37383e-08	0.014756	-0.396323	3.56931e-09	0.0015611	overlap
ENSG00000117407	cg23212751	-0.352884	3.34668e-08	0.0146373	-0.378588	1.9027e-08	0.00832178	overlap
ENSG00000117407	cg26074140	-0.367189	8.44453e-09	0.00369337	-0.436201	5.17809e-11	2.26473e-05	overlap
ENSG00000159214	cg11134246	-0.345965	6.36299e-08	0.0278297	-0.40954	9.55491e-10	0.000417901	overlap
ENSG00000117419	cg17223866	-0.497374	0	0	-0.390601	6.19342e-09	0.0027088	overlap
ENSG00000117419	cg22709362	-0.440001	1.59547e-12	6.97807e-07	-0.313967	3.90701e-06	1	fSpecific
ENSG00000142959	cg15502465	-0.373305	4.59108e-09	0.00200799	-0.51064	0	0	overlap
ENSG00000142959	cg00280609	-0.440358	1.5031e-12	6.5741e-07	-0.491066	0	0	overlap
ENSG00000222009	cg03434029	-0.344177	7.49445e-08	0.0327783	-0.421832	2.62559e-10	0.000114835	overlap
ENSG00000222009	cg11448683	-0.362447	1.34279e-08	0.00587295	-0.428768	1.2219e-10	5.34419e-05	overlap
ENSG00000222009	cg14565781	-0.399664	2.83245e-10	0.000123882	-0.460557	1.51725e-12	6.63597e-07	overlap
ENSG00000186603	cg12178578	-0.355703	2.56463e-08	0.0112169	-0.453977	4.87554e-12	2.1324e-06	overlap
ENSG00000186603	cg15071854	-0.346006	6.33927e-08	0.0277259	-0.441777	2.62285e-11	1.14715e-05	overlap
ENSG00000186603	cg16593917	-0.37686	3.20236e-09	0.00140061	-0.393728	4.58926e-09	0.0020072	overlap
ENSG00000117450	cg06070002	-0.53037	0	0	-0.528418	0	0	overlap
ENSG00000117461	cg15837086	-0.373743	4.39272e-09	0.00192123	-0.206366	0.00270123	1	fSpecific
ENSG00000117472	cg05371506	-0.459194	0	0	-0.32923	1.23019e-06	0.538045	fSpecific
ENSG00000117472	cg04975920	-0.375069	3.84171e-09	0.00168024	-0.529632	0	0	overlap
ENSG00000117472	cg19321695	-0.359244	1.82921e-08	0.00800037	-0.436074	5.25678e-11	2.29915e-05	overlap
ENSG00000171357	cg19856273	-0.340588	1.03774e-07	0.0453874	-0.190711	0.00562514	1	fSpecific
ENSG00000171357	cg24542714	-0.425757	1.25481e-11	5.48813e-06	-0.362585	7.92675e-08	0.034669	overlap
ENSG00000117480	cg06911238	-0.344617	7.19922e-08	0.0314871	-0.234682	0.00062638	1	fSpecific
ENSG00000159658	cg02787967	-0.341789	9.3104e-08	0.0407207	-0.261537	0.000132628	1	fSpecific
ENSG00000186377	cg11828446	-0.448671	2.75908e-13	1.20673e-07	-0.437851	4.25028e-11	1.85894e-05	overlap
ENSG00000162366	cg02291556	-0.422797	1.83894e-11	8.04294e-06	-0.35126	2.08125e-07	0.0910271	fSpecific
ENSG00000162366	cg07150145	-0.485163	0	0	-0.403199	1.8131e-09	0.000792992	overlap
ENSG00000162366	cg09258479	-0.435844	3.07411e-12	1.34452e-06	-0.303765	8.18086e-06	1	fSpecific
ENSG00000162366	cg26523175	-0.374334	4.13836e-09	0.00180999	-0.484473	0	0	overlap
ENSG00000162367	cg10026317	-0.3693	6.85246e-09	0.00299705	-0.231723	0.000735785	1	fSpecific
ENSG00000186564	cg06531379	0.380917	2.11142e-09	0.000923466	0.444225	1.92037e-11	8.39909e-06	overlap
ENSG00000186564	cg08260398	0.422873	1.82126e-11	7.96559e-06	0.605225	0	0	overlap
ENSG00000186564	cg13936452	0.394092	5.22601e-10	0.000228569	0.241104	0.000438656	1	fSpecific
ENSG00000186564	cg26864230	0.432076	5.32224e-12	2.32778e-06	0.355975	1.39854e-07	0.0611676	fSpecific
ENSG00000269113	cg04084173	0.367245	8.39845e-09	0.00367321	0.482392	0	0	overlap
ENSG00000269113	cg15001714	0.41007	8.65437e-11	3.78514e-05	0.447888	1.18082e-11	5.16454e-06	overlap
ENSG00000269113	cg27522154	0.344314	7.40143e-08	0.0323715	0.451318	7.28035e-12	3.18419e-06	overlap
ENSG00000117834	cg05042706	0.43341	4.39932e-12	1.92412e-06	0.449033	1.00824e-11	4.40973e-06	overlap
ENSG00000117834	cg25469314	0.440481	1.47232e-12	6.43944e-07	0.415803	4.99249e-10	0.000218356	overlap
ENSG00000132122	cg09704415	-0.444553	7.02772e-13	3.0737e-07	-0.402187	2.00535e-09	0.000877076	overlap
ENSG00000132122	cg21692516	-0.359456	1.79239e-08	0.00783934	-0.14739	0.0328583	1	fSpecific
ENSG00000186094	cg05812697	0.420062	2.59553e-11	1.1352e-05	0.507747	0	0	overlap
ENSG00000186094	cg16515477	0.373526	4.49001e-09	0.00196379	0.560004	0	0	overlap
ENSG00000186094	cg21834207	-0.345857	6.42648e-08	0.0281074	-0.19119	0.00550442	1	fSpecific
ENSG00000162373	cg11688378	0.414257	5.27319e-11	2.30633e-05	0.486579	0	0	overlap
ENSG00000142700	cg03989480	0.511722	0	0	0.406875	1.25314e-09	0.000548084	overlap
ENSG00000142700	cg04431629	-0.490806	0	0	-0.262581	0.000124438	1	fSpecific
ENSG00000142700	cg04931216	0.513673	0	0	0.374869	2.66885e-08	0.0116727	overlap
ENSG00000142700	cg08194553	0.3788	2.62594e-09	0.0011485	0.20326	0.00313739	1	fSpecific
ENSG00000142700	cg06921573	-0.503754	0	0	-0.342166	4.40314e-07	0.192579	fSpecific
ENSG00000142700	cg07362328	0.48222	0	0	0.545661	0	0	overlap
ENSG00000142700	cg10776919	-0.543004	0	0	-0.38764	8.20201e-09	0.0035873	overlap
ENSG00000142700	cg10936352	-0.415509	4.53561e-11	1.98373e-05	-0.259855	0.000146886	1	fSpecific
ENSG00000142700	cg10512745	0.409737	8.99757e-11	3.93525e-05	0.331476	1.03253e-06	0.451593	fSpecific
ENSG00000142700	cg09792881	0.443686	8.31392e-13	3.63624e-07	0.315892	3.38823e-06	1	fSpecific
ENSG00000142700	cg13210260	-0.459884	0	0	-0.367128	5.32693e-08	0.0232983	overlap
ENSG00000142700	cg12756396	0.406243	1.34776e-10	5.89468e-05	0.415733	5.02933e-10	0.000219967	overlap
ENSG00000142700	cg11448896	-0.526472	0	0	-0.434156	6.58896e-11	2.8818e-05	overlap
ENSG00000142700	cg14977066	0.50782	0	0	0.391539	5.66262e-09	0.00247665	overlap
ENSG00000142700	cg14179581	0.428957	8.19342e-12	3.58354e-06	0.355584	1.44579e-07	0.0632342	fSpecific
ENSG00000142700	cg13909582	0.37133	5.59752e-09	0.00244817	0.399296	2.66879e-09	0.00116724	overlap
ENSG00000142700	cg13941830	0.385498	1.30953e-09	0.000572745	0.372095	3.42593e-08	0.0149839	overlap
ENSG00000142700	cg17088073	0.443116	9.25094e-13	4.04606e-07	0.260538	0.000140932	1	fSpecific
ENSG00000142700	cg16809460	0.520566	0	0	0.407812	1.13959e-09	0.000498419	overlap
ENSG00000142700	cg16732616	0.449405	2.24595e-13	9.82308e-08	0.447476	1.24893e-11	5.46244e-06	overlap
ENSG00000142700	cg17800654	-0.460455	0	0	-0.23343	0.000670693	1	fSpecific
ENSG00000142700	cg16598600	0.352138	3.58912e-08	0.0156977	0.319654	2.55805e-06	1	fSpecific
ENSG00000142700	cg19380001	-0.553229	0	0	-0.413231	6.53164e-10	0.000285673	overlap
ENSG00000142700	cg18198999	-0.505613	0	0	-0.232698	0.000697937	1	fSpecific
ENSG00000142700	cg00152008	-0.507196	0	0	-0.38052	1.59332e-08	0.00696867	overlap
ENSG00000142700	cg00945234	0.511523	0	0	0.555387	0	0	overlap
ENSG00000142700	cg21774338	0.370015	6.38232e-09	0.00279142	0.301985	9.282e-06	1	fSpecific
ENSG00000142700	cg26560222	-0.541767	0	0	-0.361879	8.42746e-08	0.036859	overlap
ENSG00000142700	cg27265170	-0.528723	0	0	-0.325886	1.59293e-06	0.696696	fSpecific
ENSG00000142700	cg25191628	0.421874	2.06744e-11	9.04234e-06	0.418238	3.85999e-10	0.000168823	overlap
ENSG00000123080	cg07314186	-0.389757	8.33718e-10	0.000364642	-0.263942	0.000114479	1	fSpecific
ENSG00000123080	cg10893043	-0.379461	2.45345e-09	0.00107306	-0.18153	0.00844319	1	fSpecific
ENSG00000123080	cg11654900	-0.396296	4.10876e-10	0.000179704	-0.481581	0	0	overlap
ENSG00000123080	cg00776601	-0.42906	8.0791e-12	3.53354e-06	-0.239073	0.00049145	1	fSpecific
ENSG00000123080	cg00968536	-0.393002	5.8818e-10	0.000257251	-0.291687	1.89717e-05	1	fSpecific
ENSG00000123091	cg03102824	-0.432708	4.8652e-12	2.12788e-06	-0.405188	1.48561e-09	0.00064976	overlap
ENSG00000085831	cg03814321	-0.389704	8.38509e-10	0.000366737	-0.223103	0.00116321	1	fSpecific
ENSG00000085831	cg07591515	-0.492335	0	0	-0.344796	3.55334e-07	0.155412	fSpecific
ENSG00000085831	cg12688609	-0.39241	6.27028e-10	0.000274242	-0.286849	2.6306e-05	1	fSpecific
ENSG00000157077	cg01172972	-0.461788	0	0	-0.366499	5.63002e-08	0.0246239	overlap
ENSG00000157077	cg23279538	-0.372492	4.98207e-09	0.002179	-0.295267	1.48409e-05	1	fSpecific
ENSG00000116157	cg02453146	-0.581193	0	0	-0.542616	0	0	overlap
ENSG00000116157	cg12640469	-0.529998	0	0	-0.381375	1.47241e-08	0.00643987	overlap
ENSG00000116157	cg11953272	-0.446223	4.97019e-13	2.1738e-07	-0.408266	1.08809e-09	0.000475896	overlap
ENSG00000116157	cg16557944	-0.363293	1.23692e-08	0.00540991	-0.415005	5.42846e-10	0.000237423	overlap
ENSG00000116157	cg18087326	-0.614565	0	0	-0.576821	0	0	overlap
ENSG00000116157	cg00998379	0.378286	2.7681e-09	0.00121068	0.325993	1.57982e-06	0.690962	fSpecific
ENSG00000116157	cg22129364	-0.430331	6.7899e-12	2.96968e-06	-0.392199	5.31599e-09	0.00232504	overlap
ENSG00000116157	cg20950465	-0.385228	1.34709e-09	0.000589174	-0.399266	2.67662e-09	0.00117067	overlap
ENSG00000116157	cg23272399	-0.58965	0	0	-0.561282	0	0	overlap
ENSG00000116157	cg26251270	-0.502754	0	0	-0.413628	6.26698e-10	0.000274098	overlap
ENSG00000182183	cg04882349	-0.416103	4.22132e-11	1.84627e-05	-0.402477	1.94829e-09	0.000852121	overlap
ENSG00000182183	cg12527995	-0.352915	3.33681e-08	0.0145941	-0.196279	0.00435936	1	fSpecific
ENSG00000203995	cg06335143	-0.542992	0	0	-0.528342	0	0	overlap
ENSG00000203995	cg06784991	-0.54787	0	0	-0.565383	0	0	overlap
ENSG00000203995	cg08736216	-0.463369	0	0	-0.4434	2.13513e-11	9.33836e-06	overlap
ENSG00000203995	cg16015712	-0.575737	0	0	-0.629931	0	0	overlap
ENSG00000203995	cg18184411	-0.576179	0	0	-0.563575	0	0	overlap
ENSG00000203995	cg00397635	-0.557588	0	0	-0.593051	0	0	overlap
ENSG00000203995	cg24466241	-0.491081	0	0	-0.540041	0	0	overlap
ENSG00000121310	cg06600287	-0.357692	2.12234e-08	0.00928246	-0.274464	5.91754e-05	1	fSpecific
ENSG00000116171	cg06600287	-0.427027	1.06134e-11	4.64196e-06	-0.419694	3.3047e-10	0.000144537	overlap
ENSG00000162383	cg01808968	-0.384861	1.40002e-09	0.000612322	-0.334262	8.29314e-07	0.362715	fSpecific
ENSG00000162383	cg01132471	-0.65862	0	0	-0.50658	0	0	overlap
ENSG00000162383	cg22398359	-0.340168	1.07782e-07	0.0471405	-0.0812361	0.240928	1	fSpecific
ENSG00000162383	cg20741386	-0.635922	0	0	-0.46813	7.72573e-14	3.37899e-08	overlap
ENSG00000162383	cg25381331	-0.698667	0	0	-0.492436	0	0	overlap
ENSG00000162383	cg25762078	-0.375565	3.65341e-09	0.00159789	-0.0377054	0.586613	1	fSpecific
ENSG00000211452	cg12708287	-0.356818	2.30675e-08	0.010089	-0.180966	0.00865141	1	fSpecific
ENSG00000211452	cg15156712	-0.462922	0	0	-0.158522	0.021648	1	fSpecific
ENSG00000211452	cg19526600	-0.416565	3.99094e-11	1.74551e-05	-0.367721	5.05517e-08	0.0221097	overlap
ENSG00000211452	cg01800262	-0.503271	0	0	-0.372192	3.39622e-08	0.014854	overlap
ENSG00000211452	cg23036171	-0.348481	5.0458e-08	0.0220687	-0.259014	0.000154542	1	fSpecific
ENSG00000116212	cg20460166	-0.40808	1.09083e-10	4.77094e-05	-0.206756	0.00265054	1	fSpecific
ENSG00000162390	cg06007645	0.355168	2.69787e-08	0.0117996	0.341409	4.68169e-07	0.204762	fSpecific
ENSG00000116133	cg13548810	-0.486832	0	0	-0.499131	0	0	overlap
ENSG00000116133	cg27168858	-0.379438	2.45929e-09	0.00107561	-0.25848	0.000159594	1	fSpecific
ENSG00000143001	cg03762549	-0.3401	1.08439e-07	0.0474278	-0.19045	0.0056917	1	fSpecific
ENSG00000143001	cg20377762	-0.399588	2.85673e-10	0.000124944	-0.283659	3.25304e-05	1	fSpecific
ENSG00000169174	cg14993491	-0.37963	2.41132e-09	0.00105463	-0.419557	3.35362e-10	0.000146676	overlap
ENSG00000162409	cg02361458	-0.393702	5.45221e-10	0.000238462	-0.24495	0.000352801	1	fSpecific
ENSG00000162409	cg06836772	-0.352663	3.41687e-08	0.0149443	-0.253196	0.000218648	1	fSpecific
ENSG00000162409	cg09313917	-0.350059	4.35851e-08	0.0190627	-0.23077	0.000774656	1	fSpecific
ENSG00000187889	cg05866021	-0.578331	0	0	-0.486868	0	0	overlap
ENSG00000187889	cg05374238	-0.494852	0	0	-0.397794	3.09228e-09	0.00135247	overlap
ENSG00000187889	cg16347256	-0.422302	1.95832e-11	8.56509e-06	-0.33545	7.54831e-07	0.330139	fSpecific
ENSG00000187889	cg20704530	0.346305	6.1672e-08	0.0269733	0.336506	6.94048e-07	0.303554	fSpecific
ENSG00000187889	cg24690588	-0.42217	1.99144e-11	8.70992e-06	-0.355702	1.43139e-07	0.0626045	fSpecific
ENSG00000184292	cg01747796	-0.648527	0	0	-0.593214	0	0	overlap
ENSG00000184292	cg21536783	-0.400702	2.52311e-10	0.000110353	-0.231022	0.000764177	1	fSpecific
ENSG00000162599	cg26252077	-0.361702	1.44337e-08	0.00631283	-0.317208	3.07238e-06	1	fSpecific
ENSG00000187140	cg10785263	0.346547	6.03186e-08	0.0263814	0.362565	7.94014e-08	0.0347276	overlap
ENSG00000187140	cg12690148	-0.385686	1.2838e-09	0.000561492	-0.210952	0.00215742	1	fSpecific
ENSG00000187140	cg11848563	-0.396422	4.05248e-10	0.000177243	-0.291485	1.92348e-05	1	fSpecific
ENSG00000187140	cg23620340	-0.372487	4.98438e-09	0.00218001	-0.166339	0.015912	1	fSpecific
ENSG00000079739	cg24370698	-0.430963	6.22037e-12	2.72059e-06	-0.364635	6.63017e-08	0.0289982	overlap
ENSG00000185483	cg11724942	0.386528	1.17485e-09	0.000513842	0.507797	0	0	overlap
ENSG00000185483	cg14855150	0.340561	1.04025e-07	0.0454972	0.378964	1.83831e-08	0.00804018	overlap
ENSG00000185483	cg24052817	0.389592	8.48589e-10	0.000371146	0.514928	0	0	overlap
ENSG00000158966	cg04400131	-0.367502	8.18812e-09	0.00358122	-0.32671	1.49507e-06	0.653894	fSpecific
ENSG00000158966	cg01521258	-0.452215	7.70603e-14	3.37037e-08	-0.314109	3.86615e-06	1	fSpecific
ENSG00000158966	cg24306340	-0.461165	0	0	-0.375146	2.60273e-08	0.0113835	overlap
ENSG00000158966	cg26224018	-0.385689	1.28342e-09	0.000561328	-0.148007	0.0321279	1	fSpecific
ENSG00000158966	cg26262482	-0.441219	1.29821e-12	5.67795e-07	-0.378024	2.00336e-08	0.00876208	overlap
ENSG00000162437	cg01002030	-0.400756	2.50778e-10	0.000109682	-0.43715	4.62396e-11	2.02237e-05	overlap
ENSG00000162433	cg06994324	0.377706	2.93734e-09	0.0012847	0.358941	1.08565e-07	0.0474828	overlap
ENSG00000162433	cg10482024	-0.372289	5.08485e-09	0.00222395	-0.467779	1.1277e-13	4.93222e-08	overlap
ENSG00000116675	cg19807361	-0.366914	8.67622e-09	0.0037947	-0.265599	0.000103357	1	fSpecific
ENSG00000213625	cg01827202	0.368471	7.43999e-09	0.00325401	0.0359574	0.604089	1	fSpecific
ENSG00000213625	cg26876444	-0.340631	1.03377e-07	0.0452137	-0.299135	1.13422e-05	1	fSpecific
ENSG00000184588	cg23045908	-0.360008	1.69974e-08	0.0074341	-0.391851	5.49587e-09	0.00240372	overlap
ENSG00000081985	cg03975876	-0.342935	8.39164e-08	0.0367023	-0.311939	4.53481e-06	1	fSpecific
ENSG00000081985	cg11132246	-0.399119	3.00942e-10	0.000131623	-0.383994	1.1547e-08	0.00505027	overlap
ENSG00000081985	cg19745415	-0.460561	0	0	-0.418668	3.68732e-10	0.000161272	overlap
ENSG00000081985	cg01356829	-0.428963	8.18623e-12	3.5804e-06	-0.373276	3.08107e-08	0.0134756	overlap
ENSG00000172380	cg03140521	-0.36538	1.00886e-08	0.00441243	-0.240162	0.000462459	1	fSpecific
ENSG00000172380	cg03143457	-0.364754	1.07252e-08	0.00469088	-0.332784	9.31749e-07	0.407517	fSpecific
ENSG00000172380	cg05765440	0.345517	6.63019e-08	0.0289983	0.298607	1.17693e-05	1	fSpecific
ENSG00000172380	cg04849985	-0.351322	3.87414e-08	0.0169443	-0.186221	0.00687615	1	fSpecific
ENSG00000172380	cg13399816	-0.416404	4.07019e-11	1.78017e-05	-0.260835	0.000138416	1	fSpecific
ENSG00000172380	cg17168836	0.392902	5.94569e-10	0.000260046	0.379466	1.75544e-08	0.00767775	overlap
ENSG00000172380	cg25189904	-0.386319	1.20104e-09	0.000525298	-0.230181	0.000799569	1	fSpecific
ENSG00000162595	cg02317907	-0.361144	1.52346e-08	0.00666314	-0.202522	0.00325009	1	fSpecific
ENSG00000162595	cg16148270	-0.358803	1.90826e-08	0.0083461	-0.247189	0.000310299	1	fSpecific
ENSG00000162595	cg19694923	-0.356021	2.48836e-08	0.0108833	-0.269369	8.17221e-05	1	fSpecific
ENSG00000162595	cg21808053	0.357785	2.1035e-08	0.00920003	0.385774	9.7761e-09	0.00427576	overlap
ENSG00000162595	cg23093846	0.344229	7.45913e-08	0.0326238	0.380973	1.52806e-08	0.00668324	overlap
ENSG00000116729	cg02711326	-0.427803	9.57118e-12	4.18613e-06	-0.432584	7.90908e-11	3.45918e-05	overlap
ENSG00000116729	cg04565067	-0.39936	2.92986e-10	0.000128143	-0.432206	8.2619e-11	3.61349e-05	overlap
ENSG00000116729	cg19865425	0.393933	5.31709e-10	0.000232553	0.343193	4.05025e-07	0.177145	fSpecific
ENSG00000116729	cg00320094	-0.428104	9.1922e-12	4.02037e-06	-0.158032	0.0220606	1	fSpecific
ENSG00000116729	cg01490102	-0.357397	2.18294e-08	0.00954749	-0.334575	8.09001e-07	0.353831	fSpecific
ENSG00000116729	cg20611882	-0.429591	7.51567e-12	3.28711e-06	-0.362286	8.13538e-08	0.0355815	overlap
ENSG00000116729	cg22850128	0.390872	7.39955e-10	0.000323633	0.563839	0	0	overlap
ENSG00000116729	cg23078123	0.45405	1.34311e-14	5.87435e-09	0.424142	2.04182e-10	8.93029e-05	overlap
ENSG00000116729	cg25131922	-0.463045	0	0	-0.509519	0	0	overlap
ENSG00000197568	cg13244522	0.375093	3.83236e-09	0.00167615	0.411893	7.50209e-10	0.000328117	overlap
ENSG00000137968	cg12659128	0.377458	3.01269e-09	0.00131765	0.349499	2.41053e-07	0.105429	fSpecific
ENSG00000137968	cg20818417	0.401766	2.23961e-10	9.79533e-05	0.387621	8.21708e-09	0.00359389	overlap
ENSG00000137968	cg27336379	0.380095	2.29849e-09	0.00100528	0.333471	8.82704e-07	0.386066	fSpecific
ENSG00000137955	cg18376306	-0.342064	9.08172e-08	0.0397206	-0.289898	2.14238e-05	1	fSpecific
ENSG00000184005	cg10511850	-0.370418	6.13104e-09	0.00268152	-0.485222	0	0	overlap
ENSG00000137959	cg05696877	-0.403449	1.85272e-10	8.10322e-05	-0.316548	3.22709e-06	1	fSpecific
ENSG00000137959	cg06872964	-0.466102	0	0	-0.243418	0.000384926	1	fSpecific
ENSG00000137959	cg13304609	-0.40038	2.6154e-10	0.000114389	-0.280874	3.90769e-05	1	fSpecific
ENSG00000203943	cg05791506	0.373423	4.53668e-09	0.0019842	0.32186	2.16573e-06	0.947222	fSpecific
ENSG00000171517	cg10776377	-0.555709	0	0	-0.446185	1.48521e-11	6.49581e-06	overlap
ENSG00000171517	cg13554207	-0.369543	6.68887e-09	0.0029255	-0.394491	4.26332e-09	0.00186464	overlap
ENSG00000171517	cg24574111	0.358704	1.92644e-08	0.00842561	0.329115	1.24126e-06	0.542887	fSpecific
ENSG00000153898	cg02621376	-0.3657	9.77614e-09	0.00427577	-0.22331	0.00115069	1	fSpecific
ENSG00000153898	cg10230190	0.339911	1.10295e-07	0.0482396	0.443834	2.01946e-11	8.83245e-06	overlap
ENSG00000153898	cg01413809	-0.346598	6.00371e-08	0.0262583	-0.291699	1.89567e-05	1	fSpecific
ENSG00000055732	cg12037450	-0.403342	1.87534e-10	8.20212e-05	-0.27315	6.43507e-05	1	fSpecific
ENSG00000097096	cg13450265	-0.349379	4.64277e-08	0.020306	-0.267004	9.47329e-05	1	fSpecific
ENSG00000097096	cg01233392	-0.453848	1.94064e-14	8.48773e-09	-0.488456	0	0	overlap
ENSG00000162642	cg05654164	-0.392907	5.94272e-10	0.000259916	-0.421573	2.70019e-10	0.000118098	overlap
ENSG00000142867	cg01636910	-0.40076	2.50674e-10	0.000109637	-0.302446	8.9839e-06	1	fSpecific
ENSG00000153904	cg05925894	-0.401992	2.18357e-10	9.55023e-05	-0.320459	2.40764e-06	1	fSpecific
ENSG00000153904	cg07602008	-0.387943	1.01138e-09	0.000442345	-0.305828	7.06028e-06	1	fSpecific
ENSG00000153904	cg13206932	-0.461243	0	0	-0.319728	2.54388e-06	1	fSpecific
ENSG00000153904	cg11243029	-0.389488	8.58023e-10	0.000375272	-0.242213	0.00041209	1	fSpecific
ENSG00000153904	cg11750851	-0.359245	1.82905e-08	0.00799966	-0.195694	0.00447895	1	fSpecific
ENSG00000153904	cg14985076	-0.385682	1.28442e-09	0.000561765	-0.205083	0.00287422	1	fSpecific
ENSG00000153904	cg14322224	-0.430692	6.45882e-12	2.82488e-06	-0.364735	6.57258e-08	0.0287464	overlap
ENSG00000153904	cg17499345	-0.368881	7.14334e-09	0.00312427	-0.306761	6.6029e-06	1	fSpecific
ENSG00000153904	cg15648041	-0.42701	1.06369e-11	4.65222e-06	-0.341346	4.70582e-07	0.205817	fSpecific
ENSG00000153904	cg20293609	-0.457448	0	0	-0.343893	3.82564e-07	0.167321	fSpecific
ENSG00000153904	cg18027683	-0.401085	2.41738e-10	0.000105729	-0.307248	6.37539e-06	1	fSpecific
ENSG00000153904	cg22123915	-0.451413	1.12202e-13	4.90735e-08	-0.324096	1.82692e-06	0.799038	fSpecific
ENSG00000117174	cg00734567	-0.354633	2.83802e-08	0.0124126	-0.294633	1.55051e-05	1	fSpecific
ENSG00000122417	cg06898830	-0.386975	1.1206e-09	0.000490114	-0.384696	1.08143e-08	0.00472983	overlap
ENSG00000162654	cg27285720	-0.341642	9.4351e-08	0.0412661	-0.289973	2.1315e-05	1	fSpecific
ENSG00000183347	cg12105183	-0.540604	0	0	-0.524527	0	0	overlap
ENSG00000183347	cg24959428	-0.448817	2.65207e-13	1.15993e-07	-0.496066	0	0	overlap
ENSG00000171488	cg17176894	-0.373498	4.50257e-09	0.00196928	-0.321665	2.19785e-06	0.961271	fSpecific
ENSG00000137948	cg02935097	-0.471827	0	0	-0.458732	2.17449e-12	9.51051e-07	overlap
ENSG00000137948	cg08172037	-0.742446	0	0	-0.645481	0	0	overlap
ENSG00000137948	cg00308185	-0.702466	0	0	-0.640737	0	0	overlap
ENSG00000172031	cg07197585	-0.521881	0	0	-0.555266	0	0	overlap
ENSG00000172031	cg11585358	-0.44084	1.38543e-12	6.05945e-07	-0.467769	1.13852e-13	4.97951e-08	overlap
ENSG00000172031	cg15156367	-0.566968	0	0	-0.591137	0	0	overlap
ENSG00000172031	cg13984181	-0.388916	9.12016e-10	0.000398887	-0.420379	3.07057e-10	0.000134297	overlap
ENSG00000172031	cg00314240	-0.377305	3.06029e-09	0.00133847	-0.396313	3.57291e-09	0.00156268	overlap
ENSG00000172031	cg01347529	-0.584593	0	0	-0.602402	0	0	overlap
ENSG00000172031	cg22694470	-0.427618	9.81072e-12	4.29089e-06	-0.407261	1.20508e-09	0.000527063	overlap
ENSG00000189195	cg26580095	-0.368117	7.70541e-09	0.0033701	-0.337782	6.26831e-07	0.274156	fSpecific
ENSG00000162676	cg04777348	-0.523286	0	0	-0.450412	8.29871e-12	3.62959e-06	overlap
ENSG00000162676	cg24517501	-0.454642	0	0	-0.40899	1.0108e-09	0.00044209	overlap
ENSG00000162676	cg25320328	-0.416342	4.10092e-11	1.79361e-05	-0.24638	0.000325064	1	fSpecific
ENSG00000137936	cg05797224	0.345101	6.88776e-08	0.0301249	0.349806	2.34972e-07	0.102769	fSpecific
ENSG00000137936	cg17298516	0.351811	3.70087e-08	0.0161864	0.326936	1.46916e-06	0.642566	fSpecific
ENSG00000023909	cg00519063	-0.520916	0	0	-0.505485	0	0	overlap
ENSG00000137962	cg24049050	-0.361065	1.53507e-08	0.00671392	-0.33814	6.09145e-07	0.266421	fSpecific
ENSG00000117525	cg15026743	-0.727309	0	0	-0.679535	0	0	overlap
ENSG00000117525	cg27295434	-0.3923	6.34519e-10	0.000277518	-0.4001	2.46546e-09	0.00107831	overlap
ENSG00000143036	cg14981637	-0.427877	9.47687e-12	4.14488e-06	-0.421916	2.60177e-10	0.000113793	overlap
ENSG00000143036	cg19600538	-0.453547	2.87507e-14	1.25746e-08	-0.490599	0	0	overlap
ENSG00000117519	cg04267765	-0.439777	1.65573e-12	7.24163e-07	-0.470004	0	0	overlap
ENSG00000117519	cg08940075	-0.487381	0	0	-0.480636	0	0	overlap
ENSG00000117519	cg12613632	-0.351447	3.8292e-08	0.0167477	-0.393748	4.5801e-09	0.00200319	overlap
ENSG00000117519	cg27231335	-0.427132	1.04672e-11	4.57802e-06	-0.388017	7.91505e-09	0.00346179	overlap
ENSG00000188641	cg14072140	0.346871	5.85437e-08	0.0256051	0.227418	0.000926821	1	fSpecific
ENSG00000188641	cg24682415	0.341173	9.84435e-08	0.043056	0.162859	0.0182771	1	fSpecific
ENSG00000162688	cg10772169	-0.375361	3.72959e-09	0.00163121	-0.371776	3.52514e-08	0.0154178	overlap
ENSG00000162688	cg25758167	-0.497346	0	0	-0.470695	0	0	overlap
ENSG00000117620	cg19499674	-0.401113	2.40964e-10	0.00010539	-0.373565	3.00198e-08	0.0131297	overlap
ENSG00000079335	cg07813265	-0.365128	1.03403e-08	0.0045225	-0.415709	5.04166e-10	0.000220506	overlap
ENSG00000117543	cg14994947	-0.351631	3.76386e-08	0.0164619	-0.181278	0.0085355	1	fSpecific
ENSG00000198890	cg02934600	-0.352432	3.49151e-08	0.0152708	-0.246265	0.000327223	1	fSpecific
ENSG00000198890	cg02993280	-0.469885	0	0	-0.298274	1.20462e-05	1	fSpecific
ENSG00000198890	cg02990361	-0.520149	0	0	-0.478356	0	0	overlap
ENSG00000198890	cg07133347	-0.416017	4.26554e-11	1.86561e-05	-0.289675	2.17494e-05	1	fSpecific
ENSG00000198890	cg09367891	-0.390356	7.82036e-10	0.000342037	-0.301076	9.89666e-06	1	fSpecific
ENSG00000198890	cg11070056	-0.511567	0	0	-0.428994	1.19126e-10	5.21019e-05	overlap
ENSG00000198890	cg14828511	-0.47337	0	0	-0.385025	1.04866e-08	0.0045865	overlap
ENSG00000198890	cg14671364	-0.467231	0	0	-0.476598	0	0	overlap
ENSG00000198890	cg15468180	-0.450278	1.71077e-13	7.48234e-08	-0.374479	2.7646e-08	0.0120915	overlap
ENSG00000198890	cg00944433	-0.348329	5.11756e-08	0.0223826	-0.237878	0.000525206	1	fSpecific
ENSG00000198890	cg24693881	0.441534	1.22909e-12	5.37566e-07	0.493968	0	0	overlap
ENSG00000085491	cg24323958	-0.404515	1.64173e-10	7.18039e-05	-0.37917	1.80391e-08	0.00788971	overlap
ENSG00000162639	cg08460435	-0.482648	0	0	-0.429241	1.15846e-10	5.06675e-05	overlap
ENSG00000162639	cg12100751	-0.501376	0	0	-0.487225	0	0	overlap
ENSG00000162639	cg11947712	-0.709321	0	0	-0.736468	0	0	overlap
ENSG00000162639	cg00328227	-0.587874	0	0	-0.561424	0	0	overlap
ENSG00000162639	cg21144922	-0.527306	0	0	-0.547882	0	0	overlap
ENSG00000162639	cg24737783	-0.547778	0	0	-0.566955	0	0	overlap
ENSG00000162639	cg23680821	-0.537464	0	0	-0.551583	0	0	overlap
ENSG00000162639	cg27587125	-0.562461	0	0	-0.634429	0	0	overlap
ENSG00000121957	cg03934069	-0.341299	9.73233e-08	0.0425661	-0.290533	2.05213e-05	1	fSpecific
ENSG00000116299	cg03919114	-0.367165	8.46457e-09	0.00370213	-0.526015	0	0	overlap
ENSG00000116299	cg14613361	-0.37499	3.87278e-09	0.00169383	-0.488998	0	0	overlap
ENSG00000116299	cg16797831	-0.386443	1.18533e-09	0.000518426	-0.526271	0	0	overlap
ENSG00000221986	cg08872703	-0.442464	1.04216e-12	4.55805e-07	-0.381273	1.48641e-08	0.00650107	overlap
ENSG00000221986	cg26434376	-0.598101	0	0	-0.472001	0	0	overlap
ENSG00000134243	cg02175308	-0.356705	2.33165e-08	0.0101979	-0.39304	4.90358e-09	0.00214467	overlap
ENSG00000134243	cg13912858	-0.385023	1.37644e-09	0.000602012	-0.404502	1.59146e-09	0.000696054	overlap
ENSG00000134243	cg16988986	-0.432104	5.30073e-12	2.31837e-06	-0.490986	0	0	overlap
ENSG00000134243	cg18974926	-0.380262	2.25915e-09	0.000988079	-0.365447	6.17499e-08	0.0270074	overlap
ENSG00000134243	cg23616212	-0.39819	3.33562e-10	0.000145889	-0.441428	2.73991e-11	1.19835e-05	overlap
ENSG00000143028	cg23091122	0.350562	4.159e-08	0.0181901	0.298773	1.16337e-05	1	fSpecific
ENSG00000134201	cg24467349	-0.350484	4.18922e-08	0.0183223	-0.347308	2.89046e-07	0.12642	fSpecific
ENSG00000134202	cg10807101	-0.562285	0	0	-0.565619	0	0	overlap
ENSG00000134202	cg00297950	-0.479708	0	0	-0.496968	0	0	overlap
ENSG00000134202	cg25027501	-0.383382	1.6344e-09	0.000714833	-0.420343	3.08255e-10	0.000134821	overlap
ENSG00000134202	cg23645476	-0.485896	0	0	-0.544814	0	0	overlap
ENSG00000198758	cg00515905	-0.510257	0	0	-0.649815	0	0	overlap
ENSG00000198758	cg00491404	-0.477104	0	0	-0.61405	0	0	overlap
ENSG00000168679	cg09494546	-0.623469	0	0	-0.698221	0	0	overlap
ENSG00000168679	cg00961640	-0.663481	0	0	-0.68122	0	0	overlap
ENSG00000168679	cg25320780	-0.575404	0	0	-0.561029	0	0	overlap
ENSG00000177272	cg07808555	-0.398817	3.11172e-10	0.000136097	-0.350373	2.24118e-07	0.0980219	fSpecific
ENSG00000177272	cg06750832	-0.395541	4.46258e-10	0.000195179	-0.376905	2.21875e-08	0.0097041	overlap
ENSG00000177272	cg09410234	-0.369313	6.84366e-09	0.0029932	-0.365857	5.95713e-08	0.0260546	overlap
ENSG00000177272	cg11595545	-0.384106	1.51532e-09	0.000662753	-0.388165	7.80529e-09	0.00341378	overlap
ENSG00000177272	cg13925011	-0.519365	0	0	-0.37688	2.22373e-08	0.00972587	overlap
ENSG00000177272	cg15726426	-0.465623	0	0	-0.434794	6.11469e-11	2.67437e-05	overlap
ENSG00000177272	cg20302133	-0.404585	1.62883e-10	7.12399e-05	-0.396007	3.68074e-09	0.00160984	overlap
ENSG00000177272	cg19942256	-0.499123	0	0	-0.354471	1.58873e-07	0.0694859	fSpecific
ENSG00000177272	cg01423964	-0.379197	2.52109e-09	0.00110264	-0.35193	1.9677e-07	0.0860609	fSpecific
ENSG00000177272	cg26013553	-0.36337	1.22761e-08	0.00536917	-0.371917	3.48084e-08	0.0152241	overlap
ENSG00000177272	cg26071016	-0.428589	8.61172e-12	3.76649e-06	-0.293554	1.66978e-05	1	fSpecific
ENSG00000121931	cg02638057	-0.383853	1.55586e-09	0.000680481	-0.426138	1.63897e-10	7.16835e-05	overlap
ENSG00000121931	cg02838118	-0.412568	6.44865e-11	2.82043e-05	-0.420287	3.10105e-10	0.00013563	overlap
ENSG00000121931	cg06035702	-0.483347	0	0	-0.397791	3.09307e-09	0.00135281	overlap
ENSG00000121931	cg04577625	-0.474727	0	0	-0.448657	1.06226e-11	4.64598e-06	overlap
ENSG00000121931	cg08541521	-0.482675	0	0	-0.459267	1.96427e-12	8.59107e-07	overlap
ENSG00000121931	cg09319202	-0.415517	4.53156e-11	1.98196e-05	-0.375661	2.48422e-08	0.0108652	overlap
ENSG00000121931	cg11787288	-0.42815	9.13644e-12	3.99598e-06	-0.404222	1.63673e-09	0.000715855	overlap
ENSG00000121931	cg15139482	-0.476813	0	0	-0.404658	1.56683e-09	0.000685282	overlap
ENSG00000121931	cg16524830	-0.365321	1.01464e-08	0.00443769	-0.314857	3.6584e-06	1	fSpecific
ENSG00000121931	cg19641455	-0.426588	1.12487e-11	4.91983e-06	-0.372854	3.20032e-08	0.0139972	overlap
ENSG00000121931	cg18248911	-0.489854	0	0	-0.453025	5.64515e-12	2.46901e-06	overlap
ENSG00000121931	cg01011619	-0.362912	1.28361e-08	0.0056141	-0.370978	3.78585e-08	0.0165581	overlap
ENSG00000121931	cg23658744	-0.430169	6.94299e-12	3.03664e-06	-0.430974	9.51609e-11	4.16203e-05	overlap
ENSG00000121931	cg26522319	-0.460994	0	0	-0.470661	0	0	overlap
ENSG00000162777	cg08663890	-0.454381	4.10824e-15	1.79681e-09	-0.461182	1.3277e-12	5.80696e-07	overlap
ENSG00000162777	cg08864105	-0.379425	2.46257e-09	0.00107705	-0.409171	9.92247e-10	0.000433977	overlap
ENSG00000162777	cg19269039	-0.425133	1.36117e-11	5.95331e-06	-0.427734	1.37219e-10	6.00152e-05	overlap
ENSG00000162777	cg19268695	-0.440754	1.40587e-12	6.14882e-07	-0.447222	1.29261e-11	5.65348e-06	overlap
ENSG00000162777	cg20317872	-0.384433	1.46428e-09	0.000640428	-0.458784	2.15345e-12	9.41849e-07	overlap
ENSG00000162777	cg00619207	-0.448423	2.94639e-13	1.28866e-07	-0.424595	1.94304e-10	8.49824e-05	overlap
ENSG00000162777	cg24641737	-0.438966	1.8902e-12	8.26714e-07	-0.414563	5.68523e-10	0.000248654	overlap
ENSG00000162777	cg23631538	-0.388902	9.13364e-10	0.000399476	-0.399167	2.70266e-09	0.00118206	overlap
ENSG00000162777	cg26518580	-0.357944	2.07178e-08	0.00906128	-0.379282	1.78534e-08	0.00780852	overlap
ENSG00000064886	cg10045881	-0.357573	2.14665e-08	0.00938877	-0.315479	3.49374e-06	1	fSpecific
ENSG00000171385	cg04843968	0.382553	1.78175e-09	0.000779279	0.328902	1.26191e-06	0.551919	fSpecific
ENSG00000171385	cg17711754	0.371805	5.33746e-09	0.00233444	0.308024	6.02828e-06	1	fSpecific
ENSG00000171385	cg17898124	0.459323	0	0	0.325024	1.70178e-06	0.744306	fSpecific
ENSG00000171385	cg22040158	0.369038	7.03346e-09	0.00307621	0.339727	5.36256e-07	0.234541	fSpecific
ENSG00000155380	cg12551029	-0.340158	1.07872e-07	0.0471798	-0.399421	2.636e-09	0.0011529	overlap
ENSG00000155380	cg16251079	-0.377403	3.02981e-09	0.00132514	-0.456341	3.32311e-12	1.45342e-06	overlap
ENSG00000155380	cg19645639	-0.370277	6.21811e-09	0.0027196	-0.226827	0.00095634	1	fSpecific
ENSG00000155380	cg18383124	0.370977	5.79813e-09	0.00253592	0.355125	1.50313e-07	0.0657421	fSpecific
ENSG00000081026	cg19510626	-0.473282	0	0	-0.51268	0	0	overlap
ENSG00000081019	cg10813585	0.366441	9.09012e-09	0.00397573	0.193893	0.00486635	1	fSpecific
ENSG00000134242	cg10572465	-0.522281	0	0	-0.333485	8.81712e-07	0.385633	fSpecific
ENSG00000134242	cg14385738	-0.40694	1.24419e-10	5.44167e-05	-0.172501	0.0123756	1	fSpecific
ENSG00000134242	cg00041401	-0.416302	4.12076e-11	1.80229e-05	-0.185352	0.00714492	1	fSpecific
ENSG00000134242	cg00916635	-0.46784	0	0	-0.215473	0.00172088	1	fSpecific
ENSG00000188761	cg13063617	-0.424993	1.38628e-11	6.06314e-06	-0.378991	1.83373e-08	0.00802015	overlap
ENSG00000134262	cg13063617	-0.352492	3.47218e-08	0.0151862	-0.406416	1.31263e-09	0.000574102	overlap
ENSG00000116774	cg17253459	-0.461862	0	0	-0.540001	0	0	overlap
ENSG00000116774	cg26824174	-0.366547	8.99553e-09	0.00393436	-0.436161	5.20286e-11	2.27557e-05	overlap
ENSG00000197323	cg20992663	-0.362153	1.38164e-08	0.00604285	-0.346102	3.19221e-07	0.139617	fSpecific
ENSG00000175984	cg05625834	0.421394	2.19651e-11	9.60682e-06	0.423062	2.29757e-10	0.000100488	overlap
ENSG00000175984	cg10883038	-0.526666	0	0	-0.390697	6.13704e-09	0.00268415	overlap
ENSG00000134259	cg02626991	0.479184	0	0	0.499872	0	0	overlap
ENSG00000134259	cg04237618	0.395066	4.70032e-10	0.000205577	0.463286	8.02512e-13	3.50993e-07	overlap
ENSG00000134259	cg13845149	0.407217	1.20508e-10	5.27063e-05	0.477625	0	0	overlap
ENSG00000134259	cg01804281	0.34337	8.06649e-08	0.0352802	0.403467	1.7652e-09	0.00077204	overlap
ENSG00000134259	cg00967809	0.395921	4.28085e-10	0.000187231	0.382587	1.31616e-08	0.00575645	overlap
ENSG00000177551	cg21863110	-0.420313	2.51536e-11	1.10014e-05	-0.256137	0.000183647	1	fSpecific
ENSG00000163393	cg24682551	-0.505569	0	0	-0.411286	7.98747e-10	0.000349347	overlap
ENSG00000173212	cg03847796	-0.408247	1.0699e-10	4.67939e-05	-0.328406	1.31143e-06	0.573576	fSpecific
ENSG00000173212	cg15469709	-0.358465	1.97113e-08	0.00862111	-0.323334	1.93622e-06	0.84684	fSpecific
ENSG00000173212	cg26678765	-0.361627	1.45387e-08	0.00635876	-0.208902	0.00238682	1	fSpecific
ENSG00000116824	cg03016153	-0.367209	8.42837e-09	0.0036863	-0.322272	2.09911e-06	0.918082	fSpecific
ENSG00000116824	cg00027570	-0.52707	0	0	-0.432135	8.32999e-11	3.64327e-05	overlap
ENSG00000134247	cg17907003	-0.347572	5.48807e-08	0.024003	-0.134781	0.0511854	1	fSpecific
ENSG00000134258	cg04718492	-0.355279	2.66967e-08	0.0116763	-0.38027	1.63045e-08	0.00713106	overlap
ENSG00000134258	cg22424746	-0.382566	1.77935e-09	0.00077823	-0.333829	8.58152e-07	0.375328	fSpecific
ENSG00000183508	cg20306265	-0.345515	6.63132e-08	0.0290033	-0.331631	1.02003e-06	0.446127	fSpecific
ENSG00000183508	cg23098693	-0.355244	2.67857e-08	0.0117152	-0.23159	0.000741115	1	fSpecific
ENSG00000155761	cg02623200	-0.421302	2.22197e-11	9.71817e-06	-0.318541	2.78095e-06	1	fSpecific
ENSG00000155761	cg00570000	-0.399487	2.88892e-10	0.000126352	-0.172861	0.0121921	1	fSpecific
ENSG00000092607	cg02362103	0.347194	5.68288e-08	0.0248551	0.295501	1.46038e-05	1	fSpecific
ENSG00000092607	cg02862748	0.357814	2.09775e-08	0.00917487	0.400836	2.2926e-09	0.00100271	overlap
ENSG00000092607	cg06528645	0.392923	5.93262e-10	0.000259474	0.319906	2.51012e-06	1	fSpecific
ENSG00000092607	cg05940231	0.368768	7.22436e-09	0.0031597	0.246826	0.000316846	1	fSpecific
ENSG00000092607	cg07817024	0.363431	1.22034e-08	0.00533737	0.351457	2.04723e-07	0.0895392	fSpecific
ENSG00000092607	cg08942939	0.383792	1.56581e-09	0.000684835	0.320209	2.45346e-06	1	fSpecific
ENSG00000092607	cg19300924	0.472402	0	0	0.411996	7.42316e-10	0.000324665	overlap
ENSG00000092607	cg21301805	0.388925	9.11118e-10	0.000398494	0.24683	0.000316775	1	fSpecific
ENSG00000092607	cg24842086	0.399932	2.74946e-10	0.000120253	0.331746	1.01085e-06	0.442114	fSpecific
ENSG00000092607	cg23371746	0.350808	4.06468e-08	0.0177776	0.233803	0.000657187	1	fSpecific
ENSG00000092607	cg22820316	0.357932	2.07416e-08	0.0090717	0.330062	1.15308e-06	0.504319	fSpecific
ENSG00000092607	cg24041917	0.379906	2.34362e-09	0.00102502	0.32602	1.57652e-06	0.689518	fSpecific
ENSG00000092607	cg25340966	0.362032	1.39796e-08	0.00611421	0.239128	0.000489961	1	fSpecific
ENSG00000092621	cg14476101	-0.361346	1.49394e-08	0.00653401	-0.424946	1.86948e-10	8.17652e-05	overlap
ENSG00000092621	cg22389654	0.36853	7.39651e-09	0.003235	0.5321	0	0	overlap
ENSG00000186364	cg24879143	-0.369366	6.80792e-09	0.00297757	-0.469329	0	0	overlap
ENSG00000198483	cg05263666	-0.42827	8.99e-12	3.93194e-06	-0.342381	4.32691e-07	0.189245	fSpecific
ENSG00000143127	cg15585341	-0.42946	7.65162e-12	3.34657e-06	-0.464956	4.87919e-13	2.134e-07	overlap
ENSG00000203814	cg00721080	-0.401891	2.20843e-10	9.65898e-05	-0.439249	3.58684e-11	1.56877e-05	overlap
ENSG00000178096	cg06605933	-0.353876	3.04832e-08	0.0133324	-0.243248	0.000388649	1	fSpecific
ENSG00000159164	cg16378215	0.385824	1.26532e-09	0.000553409	0.507391	0	0	overlap
ENSG00000143368	cg16348820	-0.340696	1.02775e-07	0.0449506	-0.228852	0.000858619	1	fSpecific
ENSG00000143368	cg21208744	-0.422555	1.89631e-11	8.29384e-06	-0.276143	5.31303e-05	1	fSpecific
ENSG00000014914	cg05750047	-0.449866	1.95346e-13	8.54382e-08	-0.587281	0	0	overlap
ENSG00000014914	cg00339782	-0.475095	0	0	-0.588097	0	0	overlap
ENSG00000143401	cg03541057	-0.340715	1.02595e-07	0.0448719	-0.244015	0.000372086	1	fSpecific
ENSG00000117362	cg03763518	0.341044	9.95927e-08	0.0435587	0.222633	0.001192	1	fSpecific
ENSG00000159208	cg09563216	-0.365253	1.02146e-08	0.00446754	-0.434615	6.2444e-11	2.7311e-05	overlap
ENSG00000143369	cg03818307	-0.40487	1.57672e-10	6.89606e-05	-0.335702	7.3984e-07	0.323583	fSpecific
ENSG00000143369	cg16386293	-0.409806	8.92502e-11	3.90352e-05	-0.401285	2.19309e-09	0.000959186	overlap
ENSG00000143452	cg09034736	0.341377	9.66425e-08	0.0422683	0.379264	1.78832e-08	0.00782153	overlap
ENSG00000143418	cg02459569	-0.400506	2.57896e-10	0.000112795	-0.489401	0	0	overlap
ENSG00000143412	cg04144222	-0.384152	1.50801e-09	0.000659555	-0.405565	1.43031e-09	0.000625571	overlap
ENSG00000143412	cg07337598	-0.414914	4.87305e-11	2.13132e-05	-0.347042	2.95453e-07	0.129222	fSpecific
ENSG00000143412	cg13320146	-0.611744	0	0	-0.528293	0	0	overlap
ENSG00000143412	cg20437604	-0.583794	0	0	-0.422223	2.51666e-10	0.00011007	overlap
ENSG00000143412	cg25468058	-0.385636	1.29056e-09	0.00056445	-0.359496	1.03515e-07	0.0452743	overlap
ENSG00000143363	cg15380890	-0.386072	1.23272e-09	0.000539151	-0.298456	1.18935e-05	1	fSpecific
ENSG00000163141	cg11584936	-0.725375	0	0	-0.70306	0	0	overlap
ENSG00000163141	cg15380890	-0.580753	0	0	-0.587555	0	0	overlap
ENSG00000163159	cg15690542	-0.359756	1.74152e-08	0.00761684	-0.321012	2.30915e-06	1	fSpecific
ENSG00000159377	cg05697587	-0.343926	7.66771e-08	0.0335361	-0.102172	0.139952	1	fSpecific
ENSG00000178796	cg02959609	-0.346639	5.98077e-08	0.026158	-0.197395	0.00413877	1	fSpecific
ENSG00000143365	cg12424598	0.347702	5.42287e-08	0.0237179	0.394389	4.3057e-09	0.00188318	overlap
ENSG00000143365	cg25112191	-0.349542	4.57312e-08	0.0200014	-0.371106	3.74273e-08	0.0163695	overlap
ENSG00000225556	cg00036347	-0.345459	6.66512e-08	0.0291511	-0.352487	1.87782e-07	0.0821296	fSpecific
ENSG00000225556	cg26426745	-0.367632	8.08339e-09	0.00353542	-0.382066	1.38127e-08	0.00604125	overlap
ENSG00000196407	cg04296699	-0.464251	0	0	-0.500017	0	0	overlap
ENSG00000196407	cg05021743	-0.467453	0	0	-0.504917	0	0	overlap
ENSG00000196407	cg10781408	-0.471967	0	0	-0.516303	0	0	overlap
ENSG00000196407	cg12749132	-0.459163	0	0	-0.490226	0	0	overlap
ENSG00000196407	cg15015892	-0.474737	0	0	-0.509033	0	0	overlap
ENSG00000196407	cg19255477	-0.515942	0	0	-0.530852	0	0	overlap
ENSG00000196407	cg22604218	-0.498988	0	0	-0.521925	0	0	overlap
ENSG00000196407	cg26426745	-0.512374	0	0	-0.530865	0	0	overlap
ENSG00000197747	cg04989070	-0.493536	0	0	-0.254102	0.000207257	1	fSpecific
ENSG00000197747	cg18348690	-0.388001	1.00524e-09	0.000439662	-0.354074	1.64285e-07	0.0718531	fSpecific
ENSG00000163191	cg19930352	-0.340581	1.03843e-07	0.0454177	-0.382344	1.34607e-08	0.00588729	overlap
ENSG00000197915	cg11344574	0.381696	1.94766e-09	0.000851845	0.319724	2.54462e-06	1	fSpecific
ENSG00000143631	cg10500702	0.352358	3.51582e-08	0.0153771	0.24713	0.000311343	1	fSpecific
ENSG00000163207	cg02889647	0.477636	0	0	0.410437	8.71604e-10	0.000381212	overlap
ENSG00000163207	cg02855850	0.659881	0	0	0.442046	2.53547e-11	1.10893e-05	overlap
ENSG00000163207	cg05440289	-0.411272	7.51601e-11	3.28726e-05	-0.354385	1.60025e-07	0.06999	fSpecific
ENSG00000163207	cg15486123	0.596347	0	0	0.411388	7.90366e-10	0.000345681	overlap
ENSG00000163207	cg21419383	0.498448	0	0	0.338622	5.86063e-07	0.256325	fSpecific
ENSG00000169474	cg06101324	0.398557	3.20289e-10	0.000140084	0.4153	5.26301e-10	0.000230187	overlap
ENSG00000169474	cg07909128	0.411737	7.11507e-11	3.1119e-05	0.241724	0.000423601	1	fSpecific
ENSG00000163209	cg21543102	0.492286	0	0	0.323298	1.94158e-06	0.849183	fSpecific
ENSG00000163209	cg24667326	0.469094	0	0	0.287441	2.52823e-05	1	fSpecific
ENSG00000169469	cg18771659	0.462533	0	0	0.361087	9.02499e-08	0.0394724	overlap
ENSG00000169469	cg24884084	0.437013	2.57261e-12	1.12518e-06	0.332698	9.38131e-07	0.410309	fSpecific
ENSG00000163216	cg18771659	0.378955	2.58463e-09	0.00113043	0.27889	4.44789e-05	1	fSpecific
ENSG00000163216	cg24884084	0.430552	6.58575e-12	2.8804e-06	0.292601	1.78248e-05	1	fSpecific
ENSG00000159527	cg03222483	0.444971	6.4639e-13	2.8271e-07	0.52874	0	0	overlap
ENSG00000159527	cg06275635	0.459385	0	0	0.517808	0	0	overlap
ENSG00000159527	cg08244156	0.477056	0	0	0.419913	3.22811e-10	0.000141187	overlap
ENSG00000159527	cg09448880	0.45001	1.86704e-13	8.16583e-08	0.458512	2.26558e-12	9.90891e-07	overlap
ENSG00000159527	cg12428378	0.442746	9.9034e-13	4.33143e-07	0.435554	5.5905e-11	2.44511e-05	overlap
ENSG00000163218	cg21400802	0.380439	2.21834e-09	0.000970231	0.501505	0	0	overlap
ENSG00000163220	cg02711163	-0.354191	2.959e-08	0.0129417	-0.261581	0.000132273	1	fSpecific
ENSG00000163220	cg05848175	-0.424054	1.56529e-11	6.84609e-06	-0.400304	2.41646e-09	0.00105688	overlap
ENSG00000163220	cg15160801	-0.453686	2.43719e-14	1.06595e-08	-0.439036	3.68111e-11	1.61e-05	overlap
ENSG00000163220	cg16139316	-0.538954	0	0	-0.524844	0	0	overlap
ENSG00000163220	cg20169988	-0.527871	0	0	-0.494966	0	0	overlap
ENSG00000163220	cg23277715	-0.509045	0	0	-0.448353	1.10786e-11	4.84542e-06	overlap
ENSG00000163220	cg26937038	-0.466765	0	0	-0.457035	2.95159e-12	1.29093e-06	overlap
ENSG00000197956	cg08106792	-0.350689	4.10981e-08	0.017975	-0.251514	0.000241366	1	fSpecific
ENSG00000197956	cg16291048	-0.420537	2.44599e-11	1.0698e-05	-0.428386	1.27555e-10	5.57884e-05	overlap
ENSG00000197956	cg01910639	-0.419146	2.90807e-11	1.27189e-05	-0.393495	4.69357e-09	0.00205282	overlap
ENSG00000197956	cg24375627	-0.370913	5.83574e-09	0.00255237	-0.201237	0.00345478	1	fSpecific
ENSG00000196420	cg08127462	-0.466538	0	0	-0.483281	0	0	overlap
ENSG00000196420	cg08823182	-0.37614	3.44606e-09	0.0015072	-0.463323	7.94524e-13	3.47499e-07	overlap
ENSG00000196420	cg01910639	-0.357151	2.23475e-08	0.00977407	-0.308973	5.62848e-06	1	fSpecific
ENSG00000196154	cg18273417	-0.546601	0	0	-0.628378	0	0	overlap
ENSG00000196154	cg01411912	-0.513236	0	0	-0.540299	0	0	overlap
ENSG00000196154	cg24691453	-0.403568	1.82789e-10	7.99458e-05	-0.570987	0	0	overlap
ENSG00000196154	cg23048494	-0.377953	2.86409e-09	0.00125266	-0.460399	1.56784e-12	6.85722e-07	overlap
ENSG00000188015	cg15026767	-0.348927	4.8417e-08	0.021176	-0.233659	0.000662363	1	fSpecific
ENSG00000196754	cg07353685	-0.344315	7.40081e-08	0.0323688	-0.366085	5.83902e-08	0.025538	overlap
ENSG00000196754	cg23023513	-0.370015	6.38232e-09	0.00279142	-0.314716	3.69682e-06	1	fSpecific
ENSG00000196754	cg27310485	-0.389039	9.00146e-10	0.000393695	-0.33832	6.0042e-07	0.262605	fSpecific
ENSG00000188643	cg04990202	-0.532139	0	0	-0.450713	7.94806e-12	3.47623e-06	overlap
ENSG00000188643	cg07910075	-0.536588	0	0	-0.438229	4.06039e-11	1.77589e-05	overlap
ENSG00000188643	cg12274898	-0.360863	1.56524e-08	0.00684587	-0.375738	2.46677e-08	0.0107889	overlap
ENSG00000188643	cg13098855	-0.413527	5.75367e-11	2.51647e-05	-0.393393	4.73948e-09	0.0020729	overlap
ENSG00000188643	cg11820824	-0.535659	0	0	-0.438942	3.7238e-11	1.62867e-05	overlap
ENSG00000188643	cg19255608	-0.516505	0	0	-0.463822	6.9264e-13	3.02939e-07	overlap
ENSG00000188643	cg18859033	-0.490917	0	0	-0.327044	1.45703e-06	0.637258	fSpecific
ENSG00000188643	cg23499956	-0.482612	0	0	-0.607364	0	0	overlap
ENSG00000188643	cg23851011	-0.552112	0	0	-0.556261	0	0	overlap
ENSG00000188643	cg25433648	-0.39543	4.51702e-10	0.00019756	-0.352111	1.93799e-07	0.0847615	fSpecific
ENSG00000189334	cg06213626	-0.397818	3.47539e-10	0.000152003	-0.399015	2.74358e-09	0.00119995	overlap
ENSG00000189334	cg04990202	-0.426164	1.18943e-11	5.20219e-06	-0.322298	2.09498e-06	0.916279	fSpecific
ENSG00000189334	cg07910075	-0.397972	3.41666e-10	0.000149434	-0.232903	0.000690217	1	fSpecific
ENSG00000189334	cg12274898	-0.434561	3.72037e-12	1.62717e-06	-0.40257	1.93029e-09	0.000844245	overlap
ENSG00000189334	cg13098855	-0.538235	0	0	-0.512287	0	0	overlap
ENSG00000189334	cg11820824	-0.412027	6.87519e-11	3.00699e-05	-0.246712	0.000318929	1	fSpecific
ENSG00000189334	cg16348003	-0.454657	0	0	-0.339524	5.45107e-07	0.238413	fSpecific
ENSG00000189334	cg19255608	-0.385114	1.36341e-09	0.000596312	-0.292939	1.74172e-05	1	fSpecific
ENSG00000189334	cg18859033	-0.359368	1.80758e-08	0.00790576	-0.253739	0.000211752	1	fSpecific
ENSG00000189334	cg23499956	-0.422146	1.99752e-11	8.73649e-06	-0.329453	1.20906e-06	0.528803	fSpecific
ENSG00000189334	cg23851011	-0.571678	0	0	-0.486857	0	0	overlap
ENSG00000189334	cg25433648	-0.505483	0	0	-0.410842	8.36027e-10	0.000365652	overlap
ENSG00000189334	cg26010099	-0.346109	6.27927e-08	0.0274635	-0.261024	0.000136834	1	fSpecific
ENSG00000189171	cg25433648	-0.401495	2.30873e-10	0.000100976	-0.215767	0.00169549	1	fSpecific
ENSG00000143552	cg03352427	-0.46483	0	0	-0.292671	1.77398e-05	1	fSpecific
ENSG00000143552	cg05139571	-0.62831	0	0	-0.553099	0	0	overlap
ENSG00000143552	cg17167920	-0.422815	1.83461e-11	8.02401e-06	-0.326727	1.49313e-06	0.653046	fSpecific
ENSG00000143552	cg17383186	-0.38929	8.76418e-10	0.000383317	-0.187124	0.00660616	1	fSpecific
ENSG00000143552	cg00006626	-0.480541	0	0	-0.366765	5.49994e-08	0.024055	overlap
ENSG00000143515	cg27442164	0.379132	2.53791e-09	0.00111	0.39743	3.20431e-09	0.00140146	overlap
ENSG00000169291	cg02457680	-0.352231	3.55814e-08	0.0155622	-0.228594	0.000870527	1	fSpecific
ENSG00000169291	cg05637536	-0.415709	4.42748e-11	1.93644e-05	-0.382276	1.35467e-08	0.00592489	overlap
ENSG00000169291	cg06759781	0.411163	7.61314e-11	3.32974e-05	0.216704	0.00161689	1	fSpecific
ENSG00000169291	cg16899920	-0.370647	5.9924e-09	0.00262088	-0.285593	2.86079e-05	1	fSpecific
ENSG00000169291	cg00114710	-0.685141	0	0	-0.503859	0	0	overlap
ENSG00000169291	cg25460143	-0.412735	6.32186e-11	2.76498e-05	-0.415072	5.39029e-10	0.000235754	overlap
ENSG00000163239	cg05637536	-0.382496	1.7924e-09	0.00078394	-0.36889	4.55847e-08	0.0199373	overlap
ENSG00000163239	cg10237817	0.369535	6.6944e-09	0.00292792	0.405015	1.51157e-09	0.000661112	overlap
ENSG00000163239	cg00114710	-0.517421	0	0	-0.347162	2.9253e-07	0.127943	fSpecific
ENSG00000163239	cg22509057	0.348618	4.98227e-08	0.0217908	0.503581	0	0	overlap
ENSG00000163239	cg25460143	-0.369559	6.67842e-09	0.00292093	-0.283893	3.20291e-05	1	fSpecific
ENSG00000169242	cg12052789	-0.437558	2.36379e-12	1.03385e-06	-0.423565	2.17502e-10	9.51283e-05	overlap
ENSG00000169242	cg14612733	-0.436096	2.95917e-12	1.29425e-06	-0.406896	1.25051e-09	0.000546935	overlap
ENSG00000169242	cg16677112	-0.393161	5.78142e-10	0.000252861	-0.374474	2.76589e-08	0.0120971	overlap
ENSG00000169242	cg19628619	-0.411453	7.35728e-11	3.21784e-05	-0.336322	7.0429e-07	0.308034	fSpecific
ENSG00000169241	cg12052789	-0.340721	1.02544e-07	0.0448495	-0.318734	2.741e-06	1	fSpecific
ENSG00000185499	cg18804777	-0.416219	4.16258e-11	1.82058e-05	-0.352988	1.8003e-07	0.0787394	fSpecific
ENSG00000185499	cg01425293	-0.409601	9.14141e-11	3.99816e-05	-0.371979	3.46151e-08	0.0151395	overlap
ENSG00000185499	cg24512973	-0.424254	1.52549e-11	6.67201e-06	-0.350909	2.14325e-07	0.0937391	fSpecific
ENSG00000177628	cg14528056	-0.350995	3.99409e-08	0.0174689	-0.358081	1.16871e-07	0.0511154	fSpecific
ENSG00000143622	cg08256691	-0.409323	9.44181e-11	4.12954e-05	-0.380997	1.52477e-08	0.00666887	overlap
ENSG00000143622	cg24337215	-0.44032	1.5127e-12	6.61607e-07	-0.345965	3.22846e-07	0.141203	fSpecific
ENSG00000132680	cg17454086	-0.35722	2.22002e-08	0.00970966	-0.370891	3.8153e-08	0.0166869	overlap
ENSG00000173080	cg04233230	-0.362845	1.29194e-08	0.00565054	-0.38264	1.30969e-08	0.00572814	overlap
ENSG00000173080	cg22863889	-0.345046	6.92224e-08	0.0302756	-0.354971	1.52289e-07	0.0666065	fSpecific
ENSG00000160803	cg15896939	-0.341908	9.21118e-08	0.0402867	-0.311568	4.65946e-06	1	fSpecific
ENSG00000160803	cg19580810	-0.399448	2.90141e-10	0.000126898	-0.321567	2.2143e-06	0.968465	fSpecific
ENSG00000132698	cg09243900	-0.417739	3.45841e-11	1.5126e-05	-0.326404	1.53069e-06	0.669475	fSpecific
ENSG00000132698	cg15896939	-0.473857	0	0	-0.341526	4.63769e-07	0.202838	fSpecific
ENSG00000132698	cg19580810	-0.517934	0	0	-0.324899	1.71807e-06	0.751431	fSpecific
ENSG00000254726	cg02951552	-0.44051	1.46522e-12	6.40838e-07	-0.278606	4.53069e-05	1	fSpecific
ENSG00000254726	cg11400774	-0.405369	1.48961e-10	6.5151e-05	-0.261415	0.000133615	1	fSpecific
ENSG00000254726	cg17499241	-0.384538	1.44834e-09	0.000633456	-0.244658	0.000358717	1	fSpecific
ENSG00000160789	cg08881019	-0.369232	6.89918e-09	0.00301748	-0.463862	6.84765e-13	2.99494e-07	overlap
ENSG00000160789	cg19238380	-0.340136	1.08088e-07	0.0472741	-0.420851	2.91875e-10	0.000127657	overlap
ENSG00000160789	cg26408382	-0.362445	1.34316e-08	0.00587454	-0.367632	5.09524e-08	0.022285	overlap
ENSG00000196189	cg02774334	-0.384007	1.53109e-09	0.000669648	-0.349676	2.37519e-07	0.103883	fSpecific
ENSG00000163472	cg05954120	-0.382194	1.84964e-09	0.000808972	-0.346724	3.03288e-07	0.132649	fSpecific
ENSG00000132677	cg24473450	-0.408125	1.08512e-10	4.74599e-05	-0.358657	1.11239e-07	0.0486526	overlap
ENSG00000125462	cg02232839	0.347289	5.6332e-08	0.0246378	0.299182	1.13052e-05	1	fSpecific
ENSG00000125462	cg08548089	0.391459	6.94723e-10	0.000303849	0.465999	3.28992e-13	1.43891e-07	overlap
ENSG00000125462	cg09793584	-0.360853	1.56678e-08	0.00685259	-0.338339	5.99486e-07	0.262196	fSpecific
ENSG00000125462	cg12267069	0.376997	3.15798e-09	0.0013812	0.475945	0	0	overlap
ENSG00000125462	cg13056505	0.409369	9.39211e-11	4.10781e-05	0.482148	0	0	overlap
ENSG00000125462	cg14219449	0.344802	7.07855e-08	0.0309593	0.301201	9.81025e-06	1	fSpecific
ENSG00000125462	cg14177914	0.344516	7.26582e-08	0.0317784	0.453036	5.63625e-12	2.46512e-06	overlap
ENSG00000125462	cg15676418	0.355127	2.70852e-08	0.0118462	0.440722	2.9918e-11	1.30852e-05	overlap
ENSG00000125462	cg15820574	0.356219	2.44203e-08	0.0106807	0.249417	0.000272769	1	fSpecific
ENSG00000125462	cg24545421	0.345264	6.78532e-08	0.0296768	0.399639	2.58012e-09	0.00112846	overlap
ENSG00000125462	cg24627419	0.358955	1.88071e-08	0.00822564	0.329398	1.21419e-06	0.531046	fSpecific
ENSG00000125462	cg26681458	0.339921	1.10203e-07	0.0481995	0.409231	9.86224e-10	0.000431343	overlap
ENSG00000187862	cg09319828	-0.351999	3.63638e-08	0.0159044	-0.414192	5.90952e-10	0.000258464	overlap
ENSG00000187862	cg12124478	0.403706	1.79959e-10	7.87084e-05	0.416592	4.59454e-10	0.00020095	overlap
ENSG00000187862	cg12262564	0.484144	0	0	0.453134	5.55231e-12	2.4284e-06	overlap
ENSG00000187862	cg23679769	0.374856	3.92535e-09	0.00171682	0.359716	1.01573e-07	0.0444248	overlap
ENSG00000187862	cg26024851	0.460065	0	0	0.461458	1.24933e-12	5.46415e-07	overlap
ENSG00000132692	cg03265671	0.39313	5.80113e-10	0.000253723	0.645056	0	0	overlap
ENSG00000132692	cg05888917	0.362471	1.33967e-08	0.00585927	0.528032	0	0	overlap
ENSG00000132692	cg04843111	0.451448	1.10556e-13	4.83537e-08	0.672072	0	0	overlap
ENSG00000132692	cg07134230	-0.631254	0	0	-0.58933	0	0	overlap
ENSG00000132692	cg10389771	0.432176	5.24762e-12	2.29514e-06	0.649765	0	0	overlap
ENSG00000132692	cg13069892	0.41998	2.62198e-11	1.14677e-05	0.610101	0	0	overlap
ENSG00000132692	cg15101245	-0.626569	0	0	-0.609978	0	0	overlap
ENSG00000132692	cg16269733	0.407313	1.1918e-10	5.21255e-05	0.608679	0	0	overlap
ENSG00000132692	cg00502190	0.363132	1.25644e-08	0.00549526	0.637571	0	0	overlap
ENSG00000132692	cg23640929	0.429204	7.92328e-12	3.46539e-06	0.61984	0	0	overlap
ENSG00000132692	cg25343618	-0.647967	0	0	-0.655226	0	0	overlap
ENSG00000132688	cg12636369	-0.386659	1.15868e-09	0.000506768	-0.332068	9.85698e-07	0.431113	fSpecific
ENSG00000143320	cg18793215	-0.458663	0	0	-0.424793	1.90118e-10	8.31515e-05	overlap
ENSG00000143314	cg00346446	-0.42934	7.77804e-12	3.40187e-06	-0.423182	2.26761e-10	9.9178e-05	overlap
ENSG00000143321	cg15124109	-0.35191	3.66674e-08	0.0160372	-0.263342	0.000118774	1	fSpecific
ENSG00000143321	cg00346446	-0.393727	5.43746e-10	0.000237817	-0.426397	1.59256e-10	6.96535e-05	overlap
ENSG00000143294	cg00346446	-0.356556	2.36492e-08	0.0103434	-0.446295	1.4636e-11	6.40133e-06	overlap
ENSG00000163565	cg07463059	-0.415524	4.52751e-11	1.98019e-05	-0.345881	3.25089e-07	0.142183	fSpecific
ENSG00000163565	cg17601658	-0.421924	2.05443e-11	8.98542e-06	-0.277244	4.94867e-05	1	fSpecific
ENSG00000163565	cg19939130	0.445252	6.10381e-13	2.66961e-07	0.384649	1.08616e-08	0.0047505	overlap
ENSG00000163565	cg20597486	-0.469989	0	0	-0.384427	1.109e-08	0.00485042	overlap
ENSG00000163565	cg24539090	0.382683	1.75791e-09	0.000768852	0.262849	0.000122413	1	fSpecific
ENSG00000163568	cg07195224	-0.420155	2.56549e-11	1.12206e-05	-0.441051	2.87189e-11	1.25607e-05	overlap
ENSG00000163568	cg10636246	-0.574088	0	0	-0.504223	0	0	overlap
ENSG00000163568	cg11003133	-0.415966	4.29189e-11	1.87714e-05	-0.501029	0	0	overlap
ENSG00000163568	cg17515347	-0.564377	0	0	-0.552487	0	0	overlap
ENSG00000163568	cg17217296	-0.60339	0	0	-0.555089	0	0	overlap
ENSG00000163568	cg00490406	-0.635484	0	0	-0.550493	0	0	overlap
ENSG00000213085	cg09451092	-0.353642	3.11627e-08	0.0136296	-0.275114	5.67608e-05	1	fSpecific
ENSG00000158710	cg13892570	-0.355007	2.73951e-08	0.0119817	-0.203952	0.00303504	1	fSpecific
ENSG00000158710	cg24153924	-0.410109	8.61422e-11	3.76758e-05	-0.384802	1.07074e-08	0.00468309	overlap
ENSG00000085552	cg03222044	0.343341	8.08756e-08	0.0353724	0.319755	2.53868e-06	1	fSpecific
ENSG00000085552	cg21022868	0.343623	7.88257e-08	0.0344758	0.368438	4.74481e-08	0.0207523	overlap
ENSG00000162738	cg02951880	0.469627	0	0	0.452642	5.98262e-12	2.61661e-06	overlap
ENSG00000162738	cg06928484	0.464882	0	0	0.448169	1.13623e-11	4.96952e-06	overlap
ENSG00000162738	cg11659961	-0.405335	1.49529e-10	6.5399e-05	-0.192979	0.00507414	1	fSpecific
ENSG00000162738	cg15604357	0.590892	0	0	0.457258	2.8392e-12	1.24178e-06	overlap
ENSG00000162738	cg13428480	-0.548922	0	0	-0.553187	0	0	overlap
ENSG00000162738	cg17024258	-0.477338	0	0	-0.252648	0.000225823	1	fSpecific
ENSG00000162738	cg22696814	0.446318	4.86864e-13	2.12939e-07	0.39269	5.07127e-09	0.00221801	overlap
ENSG00000162738	cg24588482	-0.437067	2.55104e-12	1.11574e-06	-0.417404	4.21661e-10	0.000184421	overlap
ENSG00000162738	cg24688563	0.688962	0	0	0.680515	0	0	overlap
ENSG00000162739	cg10671066	-0.365137	1.03309e-08	0.00451841	-0.293825	1.63902e-05	1	fSpecific
ENSG00000162739	cg21829783	-0.370658	5.98577e-09	0.00261798	-0.386629	9.02153e-09	0.00394573	overlap
ENSG00000158769	cg22170599	-0.416528	4.00938e-11	1.75357e-05	-0.40507	1.50333e-09	0.000657507	overlap
ENSG00000143217	cg03166324	-0.479531	0	0	-0.370651	3.89777e-08	0.0170476	overlap
ENSG00000143217	cg10841756	-0.369334	6.82922e-09	0.00298688	-0.308583	5.78973e-06	1	fSpecific
ENSG00000143217	cg14158583	-0.386161	1.22124e-09	0.00053413	-0.339769	5.34469e-07	0.233759	fSpecific
ENSG00000143217	cg16557111	-0.419351	2.83505e-11	1.23996e-05	-0.237163	0.000546431	1	fSpecific
ENSG00000143217	cg17833106	-0.422788	1.84111e-11	8.05242e-06	-0.212446	0.00200309	1	fSpecific
ENSG00000143217	cg00756887	-0.48495	0	0	-0.382369	1.343e-08	0.00587386	overlap
ENSG00000143217	cg22585988	-0.364259	1.12574e-08	0.00492364	-0.227677	0.000914141	1	fSpecific
ENSG00000248485	cg07369190	-0.415327	4.63641e-11	2.02782e-05	-0.358927	1.08698e-07	0.0475409	overlap
ENSG00000248485	cg10775792	-0.495575	0	0	-0.303621	8.26499e-06	1	fSpecific
ENSG00000248485	cg11912330	-0.400967	2.44936e-10	0.000107127	-0.224435	0.0010849	1	fSpecific
ENSG00000248485	cg16172549	-0.370269	6.22269e-09	0.00272161	-0.162589	0.0184724	1	fSpecific
ENSG00000248485	cg01794501	-0.369444	6.75497e-09	0.00295441	-0.20652	0.00268109	1	fSpecific
ENSG00000248485	cg27223727	-0.442553	1.02557e-12	4.48551e-07	-0.208064	0.00248687	1	fSpecific
ENSG00000158887	cg13210580	-0.368343	7.53459e-09	0.00329539	-0.289179	2.24913e-05	1	fSpecific
ENSG00000239887	cg01930947	-0.383192	1.66704e-09	0.000729108	-0.413172	6.57132e-10	0.000287408	overlap
ENSG00000239887	cg00832644	-0.385427	1.31924e-09	0.000576992	-0.311255	4.76749e-06	1	fSpecific
ENSG00000239887	cg21547763	-0.386658	1.15879e-09	0.000506818	-0.393388	4.74184e-09	0.00207393	overlap
ENSG00000239887	cg25212701	-0.400162	2.67983e-10	0.000117207	-0.345666	3.30884e-07	0.144718	fSpecific
ENSG00000185630	cg03138364	0.34671	5.94172e-08	0.0259872	0.402811	1.88451e-09	0.000824223	overlap
ENSG00000185630	cg02955020	0.39059	7.62678e-10	0.000333571	0.395458	3.8824e-09	0.00169804	overlap
ENSG00000185630	cg17240157	0.361761	1.43512e-08	0.00627677	0.420543	3.01718e-10	0.000131962	overlap
ENSG00000185630	cg22361413	0.344876	7.03083e-08	0.0307506	0.315412	3.51123e-06	1	fSpecific
ENSG00000143179	cg06121450	-0.394728	4.87698e-10	0.000213304	-0.373528	3.01216e-08	0.0131742	overlap
ENSG00000198821	cg07786657	-0.582634	0	0	-0.505917	0	0	overlap
ENSG00000198821	cg09032544	-0.510637	0	0	-0.501204	0	0	overlap
ENSG00000198821	cg15518113	-0.40025	2.65372e-10	0.000116065	-0.245609	0.00033975	1	fSpecific
ENSG00000143147	cg25097189	0.428888	8.26976e-12	3.61693e-06	0.474025	0	0	overlap
ENSG00000213064	cg08738280	-0.382209	1.84662e-09	0.000807652	-0.25932	0.000151716	1	fSpecific
ENSG00000143153	cg06176471	-0.391199	7.144e-10	0.000312456	-0.401758	2.09262e-09	0.000915245	overlap
ENSG00000143153	cg26009832	-0.414932	4.86222e-11	2.12658e-05	-0.494254	0	0	overlap
ENSG00000000457	cg08161205	-0.47054	0	0	-0.346656	3.05009e-07	0.133401	fSpecific
ENSG00000076258	cg04402078	0.374242	4.17721e-09	0.00182698	0.469268	0	0	overlap
ENSG00000076258	cg12623034	0.472715	0	0	0.573766	0	0	overlap
ENSG00000117560	cg06983746	-0.340191	1.07558e-07	0.0470425	-0.341118	4.79345e-07	0.20965	fSpecific
ENSG00000117560	cg00071250	-0.347937	5.30649e-08	0.0232089	-0.345184	3.44232e-07	0.150556	fSpecific
ENSG00000120334	cg22379576	-0.342051	9.09238e-08	0.0397672	-0.276152	5.30993e-05	1	fSpecific
ENSG00000198797	cg18766795	0.446082	5.12525e-13	2.24162e-07	0.536979	0	0	overlap
ENSG00000075391	cg15963499	0.364391	1.1113e-08	0.00486048	0.36826	4.81994e-08	0.0210809	overlap
ENSG00000075391	cg24358781	-0.360168	1.67376e-08	0.0073205	-0.254212	0.00020591	1	fSpecific
ENSG00000116191	cg15073906	0.340139	1.08061e-07	0.0472623	0.181637	0.00840397	1	fSpecific
ENSG00000116191	cg14736905	-0.427439	1.00483e-11	4.39481e-06	-0.248452	0.000288473	1	fSpecific
ENSG00000116191	cg00833394	-0.376779	3.22904e-09	0.00141228	-0.287892	2.45281e-05	1	fSpecific
ENSG00000186283	cg03743605	-0.377266	3.07245e-09	0.00134379	-0.334602	8.07261e-07	0.35307	fSpecific
ENSG00000162782	cg03986311	0.534126	0	0	0.525442	0	0	overlap
ENSG00000162782	cg05378938	-0.497952	0	0	-0.410531	8.63179e-10	0.000377527	overlap
ENSG00000162782	cg07901138	-0.468138	0	0	-0.446045	1.51306e-11	6.61764e-06	overlap
ENSG00000162782	cg12277666	-0.455239	0	0	-0.369594	4.28248e-08	0.0187302	overlap
ENSG00000162782	cg15545772	-0.586517	0	0	-0.459463	1.89118e-12	8.27141e-07	overlap
ENSG00000162782	cg13556934	0.511313	0	0	0.496315	0	0	overlap
ENSG00000162782	cg13848905	-0.388173	9.87055e-10	0.000431706	-0.320333	2.43056e-06	1	fSpecific
ENSG00000162782	cg21941251	0.530892	0	0	0.510899	0	0	overlap
ENSG00000162782	cg20992354	0.476056	0	0	0.440327	3.14183e-11	1.37414e-05	overlap
ENSG00000162782	cg23658362	0.51463	0	0	0.518907	0	0	overlap
ENSG00000162782	cg23627040	0.409416	9.34064e-11	4.0853e-05	0.396332	3.56616e-09	0.00155972	overlap
ENSG00000162782	cg26328954	0.551847	0	0	0.554638	0	0	overlap
ENSG00000116260	cg04108706	-0.447213	3.97435e-13	1.73825e-07	-0.301384	9.68465e-06	1	fSpecific
ENSG00000116260	cg12124589	-0.375572	3.65067e-09	0.00159669	-0.252657	0.000225702	1	fSpecific
ENSG00000116260	cg24311933	-0.350786	4.07275e-08	0.0178129	-0.285837	2.81469e-05	1	fSpecific
ENSG00000143324	cg11538848	-0.387228	1.09107e-09	0.000477199	-0.361942	8.38123e-08	0.0366568	overlap
ENSG00000135835	cg02156380	-0.350043	4.36489e-08	0.0190906	-0.353916	1.66492e-07	0.0728184	fSpecific
ENSG00000135835	cg06692785	-0.351087	3.96009e-08	0.0173202	-0.23955	0.000478548	1	fSpecific
ENSG00000135835	cg19708901	-0.421987	2.03815e-11	8.91423e-06	-0.419134	3.50844e-10	0.000153448	overlap
ENSG00000153029	cg23037321	-0.36839	7.49949e-09	0.00328004	-0.326282	1.5451e-06	0.675779	fSpecific
ENSG00000198216	cg06987672	0.35473	2.8121e-08	0.0122992	0.199878	0.0036841	1	fSpecific
ENSG00000198216	cg10573505	0.38039	2.22959e-09	0.000975152	0.37408	2.86599e-08	0.0125349	overlap
ENSG00000198216	cg08943293	0.389776	8.32073e-10	0.000363922	0.363009	7.64019e-08	0.0334157	overlap
ENSG00000198216	cg12041401	0.375543	3.6613e-09	0.00160134	0.347358	2.87843e-07	0.125893	fSpecific
ENSG00000198216	cg00319893	0.349566	4.56291e-08	0.0199567	0.349683	2.37391e-07	0.103827	fSpecific
ENSG00000198216	cg22019247	0.343976	7.63288e-08	0.0333838	0.138212	0.0455085	1	fSpecific
ENSG00000198216	cg22167704	0.363564	1.20462e-08	0.00526861	0.381137	1.5052e-08	0.00658327	overlap
ENSG00000058085	cg00208830	-0.386834	1.13748e-09	0.000497498	-0.358818	1.09717e-07	0.0479869	overlap
ENSG00000157064	cg10202457	-0.368638	7.31765e-09	0.00320051	-0.176742	0.0103627	1	fSpecific
ENSG00000157064	cg00767642	-0.340728	1.02476e-07	0.0448196	-0.336261	7.07711e-07	0.30953	fSpecific
ENSG00000157064	cg22513924	-0.369781	6.53265e-09	0.00285717	-0.33929	5.55428e-07	0.242927	fSpecific
ENSG00000116698	cg14778967	-0.397676	3.53006e-10	0.000154393	-0.227761	0.000910055	1	fSpecific
ENSG00000143344	cg11422551	-0.343752	7.79082e-08	0.0340745	-0.445402	1.64705e-11	7.20367e-06	overlap
ENSG00000143344	cg22400420	-0.340286	1.0664e-07	0.0466409	-0.216732	0.00161456	1	fSpecific
ENSG00000116667	cg10061342	-0.454821	0	0	-0.281189	3.82786e-05	1	fSpecific
ENSG00000116667	cg24162801	0.346467	6.07614e-08	0.0265751	0.600641	0	0	overlap
ENSG00000073756	cg25147026	-0.4	2.72859e-10	0.00011934	-0.388174	7.7986e-09	0.00341086	overlap
ENSG00000116711	cg23610736	0.418994	2.96348e-11	1.29613e-05	0.307636	6.19981e-06	1	fSpecific
ENSG00000203724	cg06371502	0.343626	7.88058e-08	0.0344671	0.350806	2.16166e-07	0.0945442	fSpecific
ENSG00000143355	cg06371502	0.364313	1.11976e-08	0.00489749	0.206986	0.00262114	1	fSpecific
ENSG00000143355	cg26048448	0.376599	3.28891e-09	0.00143846	0.210036	0.00225733	1	fSpecific
ENSG00000081237	cg09247619	-0.443556	8.52166e-13	3.7271e-07	-0.260476	0.000141465	1	fSpecific
ENSG00000081237	cg13673094	-0.356512	2.37492e-08	0.0103871	-0.21382	0.00187018	1	fSpecific
ENSG00000170128	cg18758335	-0.423177	1.75188e-11	7.66215e-06	-0.277183	4.96819e-05	1	fSpecific
ENSG00000170128	cg23260502	-0.469065	0	0	-0.356335	1.35636e-07	0.0593227	fSpecific
ENSG00000170128	cg25377289	-0.478342	0	0	-0.395243	3.96421e-09	0.00173382	overlap
ENSG00000163362	cg03978041	-0.395931	4.27652e-10	0.000187041	-0.556415	0	0	overlap
ENSG00000163362	cg04133293	-0.441151	1.3134e-12	5.74441e-07	-0.410589	8.58139e-10	0.000375322	overlap
ENSG00000163362	cg11150074	-0.407708	1.13873e-10	4.98042e-05	-0.375978	2.4137e-08	0.0105568	overlap
ENSG00000163362	cg13419869	-0.497351	0	0	-0.54029	0	0	overlap
ENSG00000163362	cg16257559	-0.499287	0	0	-0.523781	0	0	overlap
ENSG00000163362	cg00971747	-0.392083	6.49566e-10	0.000284099	-0.371247	3.69581e-08	0.0161643	overlap
ENSG00000116852	cg02395088	0.358549	1.95532e-08	0.00855193	0.380315	1.62365e-08	0.00710134	overlap
ENSG00000116852	cg12857074	0.37539	3.71877e-09	0.00162647	0.495052	0	0	overlap
ENSG00000116852	cg18535415	0.392502	6.20861e-10	0.000271545	0.406661	1.28054e-09	0.000560067	overlap
ENSG00000232237	cg21300719	-0.431903	5.45371e-12	2.38528e-06	-0.524	0	0	overlap
ENSG00000081277	cg20869257	-0.398848	3.10121e-10	0.000135637	-0.31259	4.32365e-06	1	fSpecific
ENSG00000159166	cg10210094	-0.356524	2.37221e-08	0.0103753	-0.378869	1.85432e-08	0.00811019	overlap
ENSG00000159166	cg11418783	-0.407576	1.15624e-10	5.05704e-05	-0.441401	2.74924e-11	1.20243e-05	overlap
ENSG00000159166	cg19233001	-0.392296	6.34836e-10	0.000277657	-0.387916	7.991e-09	0.00349501	overlap
ENSG00000159166	cg18692273	-0.359557	1.77512e-08	0.0077638	-0.420039	3.18492e-10	0.000139298	overlap
ENSG00000174307	cg04055835	-0.589953	0	0	-0.507233	0	0	overlap
ENSG00000174307	cg02897366	-0.377196	3.09457e-09	0.00135347	-0.406975	1.24055e-09	0.000542576	overlap
ENSG00000174307	cg08639762	-0.509905	0	0	-0.417977	3.96825e-10	0.000173558	overlap
ENSG00000174307	cg24935896	-0.502149	0	0	-0.462985	8.68047e-13	3.79656e-07	overlap
ENSG00000174307	cg25361506	-0.364498	1.09972e-08	0.00480981	-0.383903	1.1645e-08	0.00509315	overlap
ENSG00000159176	cg18139641	-0.374556	4.04655e-09	0.00176983	-0.387653	8.19199e-09	0.00358291	overlap
ENSG00000134369	cg02862867	-0.402123	2.15158e-10	9.41031e-05	-0.226422	0.000977033	1	fSpecific
ENSG00000134369	cg06621080	0.49301	0	0	0.463678	7.21234e-13	3.15445e-07	overlap
ENSG00000134369	cg10975391	0.400044	2.71513e-10	0.000118751	0.419896	3.23394e-10	0.000141442	overlap
ENSG00000134369	cg19317258	0.367473	8.21132e-09	0.00359137	0.399024	2.74113e-09	0.00119888	overlap
ENSG00000134369	cg25167447	-0.412836	6.24666e-11	2.73209e-05	-0.274453	5.92147e-05	1	fSpecific
ENSG00000176393	cg02076020	-0.382834	1.73054e-09	0.000756882	-0.250552	0.000255323	1	fSpecific
ENSG00000176393	cg07897871	-0.397639	3.54448e-10	0.000155024	-0.331954	9.94554e-07	0.434986	fSpecific
ENSG00000176393	cg12970084	-0.387986	1.00682e-09	0.000440353	-0.246867	0.000316091	1	fSpecific
ENSG00000176393	cg26328757	-0.34484	7.05405e-08	0.0308522	-0.25106	0.000247859	1	fSpecific
ENSG00000163435	cg02076020	-0.357856	2.08924e-08	0.00913767	-0.292558	1.7877e-05	1	fSpecific
ENSG00000163435	cg07897871	-0.339534	1.14099e-07	0.0499034	-0.247272	0.000308821	1	fSpecific
ENSG00000163435	cg09262245	-0.458365	0	0	-0.477236	0	0	overlap
ENSG00000163435	cg11802442	-0.430325	6.7951e-12	2.97196e-06	-0.45917	2.00131e-12	8.75307e-07	overlap
ENSG00000163435	cg16986578	-0.343067	8.2914e-08	0.0362639	-0.194617	0.00470707	1	fSpecific
ENSG00000163435	cg18218190	-0.368989	7.06774e-09	0.0030912	-0.392529	5.15011e-09	0.0022525	overlap
ENSG00000163435	cg26932623	-0.37807	2.83013e-09	0.00123781	-0.239138	0.000489678	1	fSpecific
ENSG00000143851	cg16266227	-0.340476	1.04826e-07	0.0458474	-0.256794	0.000176581	1	fSpecific
ENSG00000143851	cg18384097	-0.46669	0	0	-0.436722	4.86659e-11	2.12849e-05	overlap
ENSG00000143851	cg01437204	-0.401047	2.42766e-10	0.000106178	-0.363964	7.03042e-08	0.0307488	overlap
ENSG00000143851	cg00903584	-0.469715	0	0	-0.480347	0	0	overlap
ENSG00000143851	cg21163972	-0.414759	4.96492e-11	2.1715e-05	-0.346023	3.21302e-07	0.140527	fSpecific
ENSG00000133067	cg04316941	0.508892	0	0	0.521028	0	0	overlap
ENSG00000133067	cg08924566	0.359767	1.73966e-08	0.00760872	0.455209	4.0076e-12	1.7528e-06	overlap
ENSG00000133067	cg14150727	0.423855	1.60587e-11	7.02355e-06	0.449844	8.99693e-12	3.93497e-06	overlap
ENSG00000159346	cg17218466	-0.449334	2.29309e-13	1.00292e-07	-0.467529	1.394e-13	6.09689e-08	overlap
ENSG00000159348	cg17218466	-0.434787	3.59873e-12	1.57397e-06	-0.301043	9.92018e-06	1	fSpecific
ENSG00000163444	cg00501542	-0.402159	2.14287e-10	9.37222e-05	-0.344093	3.76381e-07	0.164617	fSpecific
ENSG00000143847	cg02479986	0.353347	3.20403e-08	0.0140134	0.342661	4.22962e-07	0.18499	fSpecific
ENSG00000143847	cg05652480	0.373058	4.7066e-09	0.00205852	0.288437	2.36441e-05	1	fSpecific
ENSG00000143847	cg10952234	0.346283	6.17979e-08	0.0270284	0.297111	1.30617e-05	1	fSpecific
ENSG00000143847	cg09396704	0.34876	4.91739e-08	0.0215071	0.294804	1.53234e-05	1	fSpecific
ENSG00000143847	cg15618108	0.450918	1.36507e-13	5.9704e-08	0.33025	1.13631e-06	0.496986	fSpecific
ENSG00000143847	cg17862152	0.3738	4.36739e-09	0.00191016	0.289942	2.136e-05	1	fSpecific
ENSG00000143847	cg22126171	0.368731	7.25023e-09	0.00317102	0.449145	9.9269e-12	4.34171e-06	overlap
ENSG00000163485	cg03547181	-0.351284	3.8879e-08	0.0170044	-0.183414	0.00777916	1	fSpecific
ENSG00000163485	cg04563290	-0.342177	8.98936e-08	0.0393166	-0.405952	1.37555e-09	0.000601621	overlap
ENSG00000163485	cg08644365	0.384989	1.38139e-09	0.000604178	0.450525	8.1657e-12	3.57141e-06	overlap
ENSG00000163485	cg10111764	0.363063	1.26483e-08	0.00553194	0.499518	0	0	overlap
ENSG00000163485	cg11341981	0.374307	4.14959e-09	0.0018149	0.303642	8.25281e-06	1	fSpecific
ENSG00000133055	cg03448202	-0.34203	9.10991e-08	0.0398439	-0.329677	1.18816e-06	0.519662	fSpecific
ENSG00000058668	cg00319312	0.39822	3.32439e-10	0.000145398	0.365135	6.34627e-08	0.0277565	overlap
ENSG00000122188	cg06958535	-0.467891	0	0	-0.442911	2.2728e-11	9.9405e-06	overlap
ENSG00000182004	cg11405475	-0.376571	3.29821e-09	0.00144253	-0.325462	1.6456e-06	0.719731	fSpecific
ENSG00000143842	cg08258667	0.389536	8.53715e-10	0.000373388	0.183669	0.00769287	1	fSpecific
ENSG00000143845	cg02990368	-0.396843	3.86914e-10	0.000169224	-0.274515	5.89795e-05	1	fSpecific
ENSG00000143845	cg04913057	-0.368157	7.67446e-09	0.00335656	-0.217896	0.00152171	1	fSpecific
ENSG00000143845	cg08114257	-0.379511	2.44087e-09	0.00106756	-0.294852	1.52729e-05	1	fSpecific
ENSG00000143845	cg12638737	-0.426817	1.09128e-11	4.7729e-06	-0.252418	0.00022889	1	fSpecific
ENSG00000143845	cg01205165	0.345587	6.58762e-08	0.0288121	0.441493	2.7178e-11	1.18868e-05	overlap
ENSG00000174567	cg05807885	-0.356796	2.31163e-08	0.0101103	-0.408654	1.04599e-09	0.000457484	overlap
ENSG00000143850	cg02736228	-0.4939	0	0	-0.468377	5.36192e-14	2.34513e-08	overlap
ENSG00000143850	cg04554690	0.389889	8.22101e-10	0.000359561	0.362989	7.65311e-08	0.0334723	overlap
ENSG00000143850	cg04705659	0.489628	0	0	0.338104	6.10917e-07	0.267196	fSpecific
ENSG00000143850	cg08550490	0.395682	4.39452e-10	0.000192202	0.337527	6.39755e-07	0.279808	fSpecific
ENSG00000143850	cg08355099	0.414614	5.05169e-11	2.20945e-05	0.17449	0.0113923	1	fSpecific
ENSG00000143850	cg06807117	0.416746	3.90436e-11	1.70764e-05	0.399966	2.49844e-09	0.00109274	overlap
ENSG00000143850	cg10094886	-0.447979	3.30087e-13	1.44369e-07	-0.537265	0	0	overlap
ENSG00000143850	cg09085216	0.502045	0	0	0.380351	1.61824e-08	0.00707765	overlap
ENSG00000143850	cg09850925	0.379094	2.54782e-09	0.00111434	0.273567	6.26628e-05	1	fSpecific
ENSG00000143850	cg11131599	0.368173	7.66253e-09	0.00335135	0.172919	0.0121627	1	fSpecific
ENSG00000143850	cg15695045	0.347884	5.3324e-08	0.0233222	0.452883	5.76867e-12	2.52303e-06	overlap
ENSG00000143850	cg20292636	0.396414	4.05577e-10	0.000177386	0.174981	0.0111603	1	fSpecific
ENSG00000143850	cg01124530	0.339754	1.11865e-07	0.0489262	0.155192	0.0245897	1	fSpecific
ENSG00000143850	cg21581873	0.45692	0	0	0.382831	1.28658e-08	0.00562707	overlap
ENSG00000143850	cg24339032	0.426408	1.15181e-11	5.03766e-06	0.374973	2.64395e-08	0.0115638	overlap
ENSG00000143850	cg24864241	0.423191	1.74877e-11	7.64858e-06	0.437906	4.22182e-11	1.84649e-05	overlap
ENSG00000143850	cg27549944	0.405052	1.54433e-10	6.75441e-05	0.374472	2.76622e-08	0.0120986	overlap
ENSG00000133056	cg07009563	0.381321	2.02494e-09	0.000885642	0.200035	0.00365697	1	fSpecific
ENSG00000133056	cg01064725	-0.49499	0	0	-0.356528	1.33425e-07	0.058356	fSpecific
ENSG00000170382	cg04309480	0.37973	2.38642e-09	0.00104374	0.310766	4.94053e-06	1	fSpecific
ENSG00000170382	cg16488065	0.391586	6.85251e-10	0.000299707	0.338978	5.6954e-07	0.249099	fSpecific
ENSG00000170382	cg01330815	0.373136	4.66996e-09	0.00204249	0.312792	4.25996e-06	1	fSpecific
ENSG00000133069	cg02237875	0.370405	6.13896e-09	0.00268498	0.498419	0	0	overlap
ENSG00000186007	cg02520707	-0.496888	0	0	-0.563122	0	0	overlap
ENSG00000186007	cg02999711	-0.420287	2.5235e-11	1.1037e-05	-0.432917	7.61028e-11	3.32849e-05	overlap
ENSG00000186007	cg13061767	-0.462452	0	0	-0.518956	0	0	overlap
ENSG00000186007	cg19503168	0.380108	2.29542e-09	0.00100394	0.460435	1.55613e-12	6.806e-07	overlap
ENSG00000186007	cg01416657	0.45407	1.28409e-14	5.61618e-09	0.281585	3.72953e-05	1	fSpecific
ENSG00000186007	cg01364826	0.363407	1.2232e-08	0.00534987	0.253903	0.000209702	1	fSpecific
ENSG00000186007	cg25202407	-0.436853	2.63677e-12	1.15324e-06	-0.439245	3.58854e-11	1.56951e-05	overlap
ENSG00000117266	cg18320737	0.359349	1.81095e-08	0.00792052	0.407271	1.20381e-09	0.000526509	overlap
ENSG00000117266	cg24315209	0.387365	1.07527e-09	0.00047029	0.384477	1.10378e-08	0.00482759	overlap
ENSG00000174514	cg03585778	-0.43643	2.81291e-12	1.23028e-06	-0.288531	2.3496e-05	1	fSpecific
ENSG00000174514	cg03312703	-0.519826	0	0	-0.359133	1.06793e-07	0.0467077	overlap
ENSG00000174514	cg03061435	-0.424481	1.48131e-11	6.47876e-06	-0.236892	0.000554673	1	fSpecific
ENSG00000174514	cg15012468	-0.403072	1.93343e-10	8.45622e-05	-0.112782	0.103111	1	fSpecific
ENSG00000174514	cg16016034	-0.414882	4.89206e-11	2.13963e-05	-0.27083	7.45408e-05	1	fSpecific
ENSG00000162877	cg07167872	-0.560718	0	0	-0.499158	0	0	overlap
ENSG00000162877	cg07157834	-0.544473	0	0	-0.509721	0	0	overlap
ENSG00000162877	cg11965913	-0.573941	0	0	-0.510457	0	0	overlap
ENSG00000162877	cg14893161	-0.556892	0	0	-0.502007	0	0	overlap
ENSG00000162877	cg14159672	-0.587178	0	0	-0.506552	0	0	overlap
ENSG00000162877	cg17178900	-0.602328	0	0	-0.552485	0	0	overlap
ENSG00000162877	cg24503407	-0.587864	0	0	-0.533656	0	0	overlap
ENSG00000174502	cg05064852	-0.380448	2.21622e-09	0.000969305	-0.445497	1.62669e-11	7.11462e-06	overlap
ENSG00000174502	cg05122040	-0.501967	0	0	-0.561331	0	0	overlap
ENSG00000174502	cg11335179	-0.414123	5.35794e-11	2.34339e-05	-0.510553	0	0	overlap
ENSG00000174502	cg16003790	-0.418013	3.34423e-11	1.46266e-05	-0.278944	4.43217e-05	1	fSpecific
ENSG00000196188	cg02290880	-0.557024	0	0	-0.553349	0	0	overlap
ENSG00000196188	cg04457794	-0.569259	0	0	-0.523442	0	0	overlap
ENSG00000196188	cg13434570	-0.506251	0	0	-0.372113	3.42036e-08	0.0149596	overlap
ENSG00000196188	cg17591741	-0.456138	0	0	-0.424827	1.89415e-10	8.28442e-05	overlap
ENSG00000196188	cg21478437	-0.491883	0	0	-0.497061	0	0	overlap
ENSG00000162894	cg05721773	0.382676	1.75909e-09	0.00076937	0.465285	4.34916e-13	1.90218e-07	overlap
ENSG00000162894	cg06528575	0.458387	0	0	0.413911	6.08533e-10	0.000266153	overlap
ENSG00000162894	cg06640279	-0.468828	0	0	-0.510635	0	0	overlap
ENSG00000162894	cg09763644	-0.3545	2.87396e-08	0.0125698	-0.355407	1.46757e-07	0.0641866	fSpecific
ENSG00000162894	cg15158847	-0.391199	7.144e-10	0.000312456	-0.407919	1.1272e-09	0.000493003	overlap
ENSG00000162894	cg13290370	0.433664	4.24058e-12	1.8547e-06	0.428996	1.19091e-10	5.20867e-05	overlap
ENSG00000162894	cg17100176	-0.558359	0	0	-0.501113	0	0	overlap
ENSG00000162894	cg00008647	0.479944	0	0	0.496797	0	0	overlap
ENSG00000162894	cg24107163	-0.453343	3.54135e-14	1.54887e-08	-0.435693	5.49958e-11	2.40534e-05	overlap
ENSG00000162894	cg26014884	0.496704	0	0	0.426093	1.64723e-10	7.20444e-05	overlap
ENSG00000162896	cg02105856	-0.466986	0	0	-0.453658	5.12321e-12	2.24073e-06	overlap
ENSG00000162896	cg12751565	-0.593914	0	0	-0.487679	0	0	overlap
ENSG00000182795	cg14967804	-0.379094	2.54782e-09	0.00111434	-0.229842	0.000814281	1	fSpecific
ENSG00000182795	cg17031631	-0.359272	1.82434e-08	0.00797909	-0.172221	0.0125198	1	fSpecific
ENSG00000182795	cg20738274	-0.449411	2.2423e-13	9.80712e-08	-0.363382	7.39608e-08	0.0323481	overlap
ENSG00000123836	cg15153976	-0.394844	4.81545e-10	0.000210613	-0.345499	3.35455e-07	0.146717	fSpecific
ENSG00000180667	cg05398095	-0.340059	1.08837e-07	0.0476018	-0.289103	2.26058e-05	1	fSpecific
ENSG00000123843	cg14740771	-0.686136	0	0	-0.640444	0	0	overlap
ENSG00000123843	cg21571160	-0.694259	0	0	-0.649043	0	0	overlap
ENSG00000123843	cg26407558	-0.799261	0	0	-0.748748	0	0	overlap
ENSG00000123838	cg11153969	-0.603584	0	0	-0.397977	3.0375e-09	0.0013285	overlap
ENSG00000123838	cg11070419	-0.504373	0	0	-0.483348	0	0	overlap
ENSG00000123838	cg17803430	-0.539504	0	0	-0.421985	2.58251e-10	0.000112951	overlap
ENSG00000123838	cg22332276	-0.59112	0	0	-0.408703	1.04076e-09	0.000455194	overlap
ENSG00000123838	cg26044340	-0.536643	0	0	-0.470532	0	0	overlap
ENSG00000196352	cg26826631	-0.556727	0	0	-0.538645	0	0	overlap
ENSG00000076356	cg19721764	-0.413166	6.00625e-11	2.62694e-05	-0.212327	0.00201503	1	fSpecific
ENSG00000076356	cg25838968	0.384498	1.45438e-09	0.0006361	0.485796	0	0	overlap
ENSG00000196878	cg07168232	-0.462266	0	0	-0.406793	1.26353e-09	0.00055263	overlap
ENSG00000196878	cg19709585	-0.492607	0	0	-0.390316	6.364e-09	0.00278341	overlap
ENSG00000196878	cg01580568	-0.464889	0	0	-0.398834	2.79254e-09	0.00122137	overlap
ENSG00000196878	cg22789976	0.499361	0	0	0.346332	3.13254e-07	0.137007	fSpecific
ENSG00000196878	cg22502856	-0.59022	0	0	-0.560744	0	0	overlap
ENSG00000196878	cg26107033	-0.562184	0	0	-0.513004	0	0	overlap
ENSG00000123689	cg06616057	-0.367838	7.92039e-09	0.00346413	-0.329796	1.17718e-06	0.514862	fSpecific
ENSG00000123689	cg26050864	-0.422993	1.79354e-11	7.84438e-06	-0.501743	0	0	overlap
ENSG00000009790	cg09802688	-0.341077	9.92939e-08	0.043428	-0.252624	0.000226133	1	fSpecific
ENSG00000143469	cg12052613	0.349014	4.80283e-08	0.021006	0.383649	1.19238e-08	0.00521509	overlap
ENSG00000143469	cg18759788	0.454689	0	0	0.441794	2.61731e-11	1.14473e-05	overlap
ENSG00000143469	cg01552839	0.346057	6.30974e-08	0.0275968	0.408047	1.1126e-09	0.000486616	overlap
ENSG00000082512	cg06813419	-0.419538	2.77012e-11	1.21156e-05	-0.411922	7.48003e-10	0.000327152	overlap
ENSG00000082512	cg10177528	-0.456685	0	0	-0.394545	4.24095e-09	0.00185485	overlap
ENSG00000082512	cg10380585	-0.436367	2.83997e-12	1.24211e-06	-0.48075	0	0	overlap
ENSG00000082512	cg12465501	-0.45259	6.22437e-14	2.72234e-08	-0.341907	4.4967e-07	0.196671	fSpecific
ENSG00000082512	cg11415739	-0.483077	0	0	-0.416699	4.54271e-10	0.000198684	overlap
ENSG00000082512	cg11131549	-0.421597	2.1409e-11	9.36363e-06	-0.366486	5.63644e-08	0.024652	overlap
ENSG00000082512	cg11824945	-0.522974	0	0	-0.386658	8.99737e-09	0.00393516	overlap
ENSG00000082512	cg01780943	-0.462487	0	0	-0.486505	0	0	overlap
ENSG00000082512	cg21158528	-0.446249	4.94217e-13	2.16155e-07	-0.498982	0	0	overlap
ENSG00000082512	cg27433482	-0.346467	6.07614e-08	0.0265751	-0.221795	0.00124509	1	fSpecific
ENSG00000066027	cg12417775	-0.483384	0	0	-0.226691	0.000963259	1	fSpecific
ENSG00000143494	cg26875131	0.413835	5.54602e-11	2.42565e-05	0.460927	1.40299e-12	6.13624e-07	overlap
ENSG00000117707	cg04976324	-0.520096	0	0	-0.595317	0	0	overlap
ENSG00000117707	cg10827893	-0.374903	3.90702e-09	0.00170881	-0.30495	7.5184e-06	1	fSpecific
ENSG00000117707	cg12298905	-0.349008	4.8053e-08	0.0210169	-0.43383	6.84496e-11	2.99377e-05	overlap
ENSG00000117707	cg14019317	-0.35334	3.20598e-08	0.0140219	-0.324566	1.76242e-06	0.770826	fSpecific
ENSG00000117707	cg13921308	0.466068	0	0	0.489265	0	0	overlap
ENSG00000117707	cg16242653	0.504408	0	0	0.546716	0	0	overlap
ENSG00000117707	cg16382030	0.555335	0	0	0.514746	0	0	overlap
ENSG00000117707	cg17954152	-0.453475	3.10732e-14	1.35904e-08	-0.322973	1.99024e-06	0.870465	fSpecific
ENSG00000117707	cg00417025	0.676489	0	0	0.664285	0	0	overlap
ENSG00000117707	cg00132255	0.382299	1.82949e-09	0.000800159	0.589813	0	0	overlap
ENSG00000117707	cg01659176	0.554995	0	0	0.610346	0	0	overlap
ENSG00000117707	cg01902845	0.452391	7.00021e-14	3.06167e-08	0.49066	0	0	overlap
ENSG00000117707	cg22176895	-0.361963	1.40738e-08	0.00615543	-0.339544	5.44199e-07	0.238015	fSpecific
ENSG00000117707	cg22800590	0.5398	0	0	0.522872	0	0	overlap
ENSG00000117707	cg22376805	0.600178	0	0	0.614111	0	0	overlap
ENSG00000117707	cg23260547	-0.358761	1.91605e-08	0.0083802	-0.282354	3.54572e-05	1	fSpecific
ENSG00000117707	cg23084895	-0.414021	5.42415e-11	2.37235e-05	-0.525435	0	0	overlap
ENSG00000117707	cg24083324	-0.46043	0	0	-0.532619	0	0	overlap
ENSG00000117707	cg23992410	-0.411644	7.19312e-11	3.14604e-05	-0.334074	8.41717e-07	0.36814	fSpecific
ENSG00000117707	cg25379954	0.619219	0	0	0.565583	0	0	overlap
ENSG00000117707	cg26293546	-0.491018	0	0	-0.537267	0	0	overlap
ENSG00000117707	cg26054764	0.573218	0	0	0.638709	0	0	overlap
ENSG00000152104	cg16388983	-0.35372	3.09328e-08	0.013529	-0.233565	0.000665787	1	fSpecific
ENSG00000136636	cg23923495	-0.384135	1.51078e-09	0.000660769	-0.127694	0.0647856	1	fSpecific
ENSG00000196482	cg02920150	0.523229	0	0	0.585347	0	0	overlap
ENSG00000196482	cg05002166	0.456038	0	0	0.500046	0	0	overlap
ENSG00000196482	cg07908000	0.542965	0	0	0.534223	0	0	overlap
ENSG00000196482	cg07479303	0.461358	0	0	0.518377	0	0	overlap
ENSG00000196482	cg08454344	0.510017	0	0	0.597981	0	0	overlap
ENSG00000196482	cg08168529	0.497589	0	0	0.568953	0	0	overlap
ENSG00000196482	cg07155223	0.392035	6.52942e-10	0.000285576	0.239572	0.000477959	1	fSpecific
ENSG00000196482	cg10090568	0.614762	0	0	0.601043	0	0	overlap
ENSG00000196482	cg13461390	0.431715	5.59972e-12	2.44914e-06	0.521525	0	0	overlap
ENSG00000196482	cg13490235	0.414103	5.37101e-11	2.34911e-05	0.564064	0	0	overlap
ENSG00000196482	cg13321105	0.497423	0	0	0.464808	5.12608e-13	2.24199e-07	overlap
ENSG00000196482	cg13242895	0.430991	6.19641e-12	2.71011e-06	0.433529	7.08883e-11	3.10043e-05	overlap
ENSG00000196482	cg17011300	0.341097	9.91199e-08	0.0433519	0.403951	1.68172e-09	0.000735529	overlap
ENSG00000196482	cg19645299	0.378153	2.80612e-09	0.00122731	0.463891	6.79205e-13	2.97063e-07	overlap
ENSG00000196482	cg20320200	0.553265	0	0	0.566008	0	0	overlap
ENSG00000196482	cg18223579	0.616351	0	0	0.608055	0	0	overlap
ENSG00000196482	cg01432520	0.476072	0	0	0.584325	0	0	overlap
ENSG00000196482	cg01833485	0.418651	3.09171e-11	1.35222e-05	0.469301	0	0	overlap
ENSG00000196482	cg00983697	0.537752	0	0	0.553139	0	0	overlap
ENSG00000196482	cg22612448	-0.374895	3.90995e-09	0.00171009	-0.15019	0.0296526	1	fSpecific
ENSG00000196482	cg21607848	0.487781	0	0	0.630079	0	0	overlap
ENSG00000196482	cg24346507	0.516788	0	0	0.509781	0	0	overlap
ENSG00000196482	cg25389804	0.503756	0	0	0.428241	1.29649e-10	5.67045e-05	overlap
ENSG00000092978	cg03511754	-0.345124	6.8732e-08	0.0300612	-0.273224	6.40488e-05	1	fSpecific
ENSG00000162814	cg03511754	-0.341274	9.75431e-08	0.0426622	-0.178224	0.00973078	1	fSpecific
ENSG00000092969	cg02958843	-0.370507	6.07701e-09	0.00265789	-0.254148	0.000206686	1	fSpecific
ENSG00000092969	cg07810039	-0.445574	5.70968e-13	2.49723e-07	-0.396746	3.42548e-09	0.0014982	overlap
ENSG00000092969	cg10484211	-0.555631	0	0	-0.438274	4.03816e-11	1.76616e-05	overlap
ENSG00000092969	cg01558923	-0.428861	8.3009e-12	3.63055e-06	-0.382904	1.27793e-08	0.00558927	overlap
ENSG00000092969	cg20991819	0.38637	1.1945e-09	0.000522437	0.461522	1.23173e-12	5.38719e-07	overlap
ENSG00000092969	cg21387604	-0.379257	2.50556e-09	0.00109585	-0.468846	1.13249e-14	4.95316e-09	overlap
ENSG00000092969	cg27508144	-0.449036	2.49621e-13	1.09176e-07	-0.420339	3.08384e-10	0.000134877	overlap
ENSG00000116141	cg14154859	-0.420194	2.55309e-11	1.11664e-05	-0.326273	1.54618e-06	0.67625	fSpecific
ENSG00000116141	cg14231871	-0.371421	5.5465e-09	0.00242586	-0.324618	1.75545e-06	0.767776	fSpecific
ENSG00000116141	cg19720265	-0.440023	1.58959e-12	6.95237e-07	-0.280159	4.09489e-05	1	fSpecific
ENSG00000162817	cg18959309	-0.368185	7.65342e-09	0.00334736	-0.551557	0	0	overlap
ENSG00000162817	cg01471713	-0.358025	2.05591e-08	0.00899188	-0.443943	1.99135e-11	8.70954e-06	overlap
ENSG00000186205	cg20768915	0.358026	2.05572e-08	0.00899108	0.25617	0.000183293	1	fSpecific
ENSG00000143512	cg05600044	-0.358662	1.9343e-08	0.00846002	-0.366133	5.81448e-08	0.0254307	overlap
ENSG00000143512	cg00613344	0.344119	7.53439e-08	0.032953	0.34822	2.68045e-07	0.117234	fSpecific
ENSG00000143512	cg22076769	0.407921	1.11108e-10	4.85952e-05	0.469254	0	0	overlap
ENSG00000162819	cg19672873	-0.473794	0	0	-0.376071	2.39335e-08	0.0104677	overlap
ENSG00000197520	cg18665384	-0.482453	0	0	-0.597679	0	0	overlap
ENSG00000143502	cg05708255	0.387637	1.04475e-09	0.000456939	0.384953	1.0558e-08	0.00461773	overlap
ENSG00000143502	cg22158547	0.357192	2.2261e-08	0.00973623	0.437085	4.65999e-11	2.03813e-05	overlap
ENSG00000143502	cg24486540	0.496859	0	0	0.525466	0	0	overlap
ENSG00000203697	cg19249749	-0.644961	0	0	-0.711789	0	0	overlap
ENSG00000203697	cg23251790	-0.405667	1.43965e-10	6.29655e-05	-0.519931	0	0	overlap
ENSG00000203697	cg27235315	-0.389479	8.5887e-10	0.000375642	-0.491575	0	0	overlap
ENSG00000162909	cg10100437	-0.357179	2.22885e-08	0.00974826	-0.387271	8.49277e-09	0.00371446	overlap
ENSG00000162909	cg09575442	-0.472605	0	0	-0.260845	0.000138329	1	fSpecific
ENSG00000162909	cg15033552	-0.35796	2.06867e-08	0.00904768	-0.33633	7.03854e-07	0.307843	fSpecific
ENSG00000162909	cg17470627	-0.411088	7.6805e-11	3.3592e-05	-0.339307	5.54677e-07	0.242598	fSpecific
ENSG00000162909	cg19029214	-0.395195	4.63485e-10	0.000202713	-0.288965	2.28183e-05	1	fSpecific
ENSG00000162909	cg00792251	-0.372149	5.15657e-09	0.00225532	-0.312916	4.22121e-06	1	fSpecific
ENSG00000143786	cg05376937	0.380695	2.16042e-09	0.000944898	0.141213	0.0409852	1	fSpecific
ENSG00000143786	cg21290042	-0.358274	2.0074e-08	0.00877972	-0.183514	0.00774533	1	fSpecific
ENSG00000143786	cg25723050	-0.343785	7.76722e-08	0.0339713	-0.201247	0.00345329	1	fSpecific
ENSG00000185842	cg14091631	-0.357623	2.13626e-08	0.0093433	-0.458618	2.2213e-12	9.71525e-07	overlap
ENSG00000185842	cg17482224	-0.410929	7.82543e-11	3.42259e-05	-0.382786	1.292e-08	0.00565082	overlap
ENSG00000143815	cg03048947	-0.41338	5.8554e-11	2.56096e-05	-0.299998	1.06764e-05	1	fSpecific
ENSG00000154380	cg06784545	-0.349076	4.77531e-08	0.0208857	-0.160534	0.0200222	1	fSpecific
ENSG00000143819	cg03138928	-0.4869	0	0	-0.482993	0	0	overlap
ENSG00000143819	cg05935800	-0.500725	0	0	-0.427432	1.41926e-10	6.20741e-05	overlap
ENSG00000143819	cg00501904	-0.441068	1.33234e-12	5.82721e-07	-0.311898	4.5486e-06	1	fSpecific
ENSG00000143819	cg25152404	-0.509304	0	0	-0.522668	0	0	overlap
ENSG00000196187	cg20240791	-0.412206	6.73158e-11	2.94418e-05	-0.183341	0.00780385	1	fSpecific
ENSG00000196187	cg17950169	-0.387666	1.04158e-09	0.000455553	-0.244734	0.000357157	1	fSpecific
ENSG00000143811	cg00130693	-0.378412	2.73266e-09	0.00119518	-0.326169	1.55856e-06	0.681664	fSpecific
ENSG00000203685	cg15837208	0.35529	2.66686e-08	0.011664	0.231363	0.000750251	1	fSpecific
ENSG00000203685	cg22157069	0.38254	1.78415e-09	0.000780329	0.488825	0	0	overlap
ENSG00000143776	cg07379550	0.35584	2.53154e-08	0.0110722	0.411113	8.13052e-10	0.000355603	overlap
ENSG00000143776	cg00647769	-0.399829	2.78106e-10	0.000121634	-0.30136	9.7006e-06	1	fSpecific
ENSG00000143776	cg24860534	-0.38687	1.13315e-09	0.000495606	-0.330622	1.10381e-06	0.482773	fSpecific
ENSG00000143816	cg21859455	0.427985	9.34049e-12	4.08523e-06	0.562006	0	0	overlap
ENSG00000143816	cg24312489	0.486699	0	0	0.53905	0	0	overlap
ENSG00000143816	cg25940008	0.391863	6.65155e-10	0.000290918	0.410276	8.86097e-10	0.00038755	overlap
ENSG00000198835	cg03065165	-0.395174	4.64515e-10	0.000203164	-0.420921	2.89684e-10	0.000126699	overlap
ENSG00000198835	cg08228672	-0.35606	2.4792e-08	0.0108432	-0.37709	2.18162e-08	0.00954172	overlap
ENSG00000198835	cg07103618	-0.403853	1.76986e-10	7.74082e-05	-0.32717	1.44297e-06	0.631109	fSpecific
ENSG00000198835	cg10950111	-0.422578	1.89096e-11	8.27047e-06	-0.366843	5.46242e-08	0.0238909	overlap
ENSG00000198835	cg00393263	-0.349233	4.70617e-08	0.0205833	-0.335737	7.37787e-07	0.322685	fSpecific
ENSG00000198835	cg01789576	-0.405859	1.40847e-10	6.1602e-05	-0.332149	9.79404e-07	0.42836	fSpecific
ENSG00000198835	cg20848130	-0.375524	3.66853e-09	0.0016045	-0.36589	5.93954e-08	0.0259776	overlap
ENSG00000198835	cg24052475	-0.363396	1.22452e-08	0.00535566	-0.335811	7.33471e-07	0.320797	fSpecific
ENSG00000162913	cg06806210	0.408847	9.97957e-11	4.36474e-05	0.431877	8.58076e-11	3.75295e-05	overlap
ENSG00000162913	cg08723571	0.453658	2.52385e-14	1.10385e-08	0.442677	2.34114e-11	1.02394e-05	overlap
ENSG00000162913	cg26066912	0.361863	1.42106e-08	0.00621526	0.434792	6.11562e-11	2.67478e-05	overlap
ENSG00000154358	cg03339987	0.345944	6.37542e-08	0.0278841	0.53913	0	0	overlap
ENSG00000154358	cg05048523	0.480339	0	0	0.508908	0	0	overlap
ENSG00000154358	cg08621574	0.452216	7.70225e-14	3.36872e-08	0.570622	0	0	overlap
ENSG00000154358	cg08723571	0.366404	9.12325e-09	0.00399022	0.471266	0	0	overlap
ENSG00000154358	cg11852843	0.359536	1.77875e-08	0.00777968	0.554886	0	0	overlap
ENSG00000154358	cg13791379	0.350989	3.9965e-08	0.0174794	0.512944	0	0	overlap
ENSG00000154358	cg00063346	0.498816	0	0	0.523362	0	0	overlap
ENSG00000154358	cg00270521	0.363452	1.21792e-08	0.00532681	0.518123	0	0	overlap
ENSG00000154358	cg23630430	0.469405	0	0	0.61801	0	0	overlap
ENSG00000154358	cg27171837	0.388828	9.20587e-10	0.000402635	0.555306	0	0	overlap
ENSG00000154358	cg26362105	0.367934	7.84547e-09	0.00343136	0.554885	0	0	overlap
ENSG00000162931	cg02952008	-0.449821	1.98121e-13	8.66518e-08	-0.344056	3.77498e-07	0.165105	fSpecific
ENSG00000162931	cg02931001	-0.399539	2.87234e-10	0.000125627	-0.212919	0.00195638	1	fSpecific
ENSG00000162931	cg04945350	-0.449087	2.46081e-13	1.07628e-07	-0.39248	5.17451e-09	0.00226317	overlap
ENSG00000162931	cg20939768	-0.461619	0	0	-0.366621	5.57001e-08	0.0243614	overlap
ENSG00000162931	cg24848599	-0.50343	0	0	-0.417529	4.16143e-10	0.000182008	overlap
ENSG00000181218	cg03449175	-0.652041	0	0	-0.56066	0	0	overlap
ENSG00000181218	cg06034933	-0.751753	0	0	-0.66669	0	0	overlap
ENSG00000181218	cg08639523	-0.596802	0	0	-0.519784	0	0	overlap
ENSG00000181218	cg06757385	-0.568313	0	0	-0.478985	0	0	overlap
ENSG00000181218	cg07225598	-0.695037	0	0	-0.562041	0	0	overlap
ENSG00000181218	cg10248492	-0.622057	0	0	-0.522122	0	0	overlap
ENSG00000181218	cg11343017	-0.714825	0	0	-0.643221	0	0	overlap
ENSG00000181218	cg11672054	-0.702692	0	0	-0.574977	0	0	overlap
ENSG00000181218	cg14743462	-0.685505	0	0	-0.595883	0	0	overlap
ENSG00000181218	cg14541950	-0.723843	0	0	-0.632356	0	0	overlap
ENSG00000181218	cg15471815	-0.700287	0	0	-0.59932	0	0	overlap
ENSG00000181218	cg13449295	-0.620633	0	0	-0.506766	0	0	overlap
ENSG00000181218	cg14159336	-0.733489	0	0	-0.608921	0	0	overlap
ENSG00000181218	cg17515024	-0.723554	0	0	-0.693245	0	0	overlap
ENSG00000181218	cg00146645	-0.62915	0	0	-0.486997	0	0	overlap
ENSG00000181218	cg00112780	-0.759929	0	0	-0.664632	0	0	overlap
ENSG00000181218	cg00948275	-0.72815	0	0	-0.590561	0	0	overlap
ENSG00000181218	cg21453443	-0.719725	0	0	-0.631209	0	0	overlap
ENSG00000181218	cg21401647	-0.729312	0	0	-0.611391	0	0	overlap
ENSG00000181218	cg25272655	-0.752916	0	0	-0.64262	0	0	overlap
ENSG00000196890	cg03449175	-0.538468	0	0	-0.387014	8.70059e-09	0.00380536	overlap
ENSG00000196890	cg06034933	-0.637135	0	0	-0.466976	2.02476e-13	8.85566e-08	overlap
ENSG00000196890	cg08639523	-0.510972	0	0	-0.362133	8.24398e-08	0.0360565	overlap
ENSG00000196890	cg06757385	-0.460396	0	0	-0.270188	7.76222e-05	1	fSpecific
ENSG00000196890	cg07225598	-0.607859	0	0	-0.386978	8.73037e-09	0.00381838	overlap
ENSG00000196890	cg10248492	-0.479764	0	0	-0.290013	2.12571e-05	1	fSpecific
ENSG00000196890	cg11343017	-0.554294	0	0	-0.422419	2.46381e-10	0.000107759	overlap
ENSG00000196890	cg11672054	-0.59749	0	0	-0.403885	1.69287e-09	0.000740408	overlap
ENSG00000196890	cg14743462	-0.583591	0	0	-0.404707	1.55911e-09	0.000681905	overlap
ENSG00000196890	cg14541950	-0.576573	0	0	-0.435269	5.78185e-11	2.5288e-05	overlap
ENSG00000196890	cg15471815	-0.604657	0	0	-0.418913	3.59235e-10	0.000157118	overlap
ENSG00000196890	cg13449295	-0.469442	0	0	-0.310099	5.1866e-06	1	fSpecific
ENSG00000196890	cg14159336	-0.622102	0	0	-0.385025	1.04866e-08	0.0045865	overlap
ENSG00000196890	cg17515024	-0.624651	0	0	-0.461282	1.29901e-12	5.68147e-07	overlap
ENSG00000196890	cg00146645	-0.521214	0	0	-0.312185	4.45376e-06	1	fSpecific
ENSG00000196890	cg00112780	-0.616619	0	0	-0.452979	5.68533e-12	2.48658e-06	overlap
ENSG00000196890	cg00948275	-0.622983	0	0	-0.416329	4.72369e-10	0.000206599	overlap
ENSG00000196890	cg21453443	-0.62328	0	0	-0.443106	2.21687e-11	9.69588e-06	overlap
ENSG00000196890	cg21401647	-0.579064	0	0	-0.430204	1.0388e-10	4.54338e-05	overlap
ENSG00000196890	cg25272655	-0.614439	0	0	-0.414236	5.88242e-10	0.000257278	overlap
ENSG00000116574	cg12762413	-0.424224	1.53133e-11	6.69754e-06	-0.478876	0	0	overlap
ENSG00000177614	cg03469233	0.430005	7.10192e-12	3.10615e-06	0.438348	4.0022e-11	1.75044e-05	overlap
ENSG00000177614	cg06313507	0.532127	0	0	0.526375	0	0	overlap
ENSG00000177614	cg05266497	0.344785	7.08933e-08	0.0310065	0.436805	4.81863e-11	2.10751e-05	overlap
ENSG00000177614	cg09938881	0.35777	2.10666e-08	0.00921385	0.512103	0	0	overlap
ENSG00000177614	cg11176853	0.387558	1.05359e-09	0.000460806	0.395541	3.85129e-09	0.00168443	overlap
ENSG00000177614	cg17039722	0.341482	9.57339e-08	0.041871	0.282092	3.60735e-05	1	fSpecific
ENSG00000177614	cg17494334	0.512232	0	0	0.497032	0	0	overlap
ENSG00000177614	cg00075975	0.459526	0	0	0.533562	0	0	overlap
ENSG00000177614	cg22430231	-0.419583	2.75489e-11	1.2049e-05	-0.312288	4.42046e-06	1	fSpecific
ENSG00000177614	cg20967887	0.375425	3.70554e-09	0.00162068	0.445527	1.62032e-11	7.08677e-06	overlap
ENSG00000177614	cg20699340	0.452185	7.82709e-14	3.42332e-08	0.412041	7.38845e-10	0.000323147	overlap
ENSG00000177614	cg27224809	0.480665	0	0	0.508702	0	0	overlap
ENSG00000135744	cg07502417	-0.523622	0	0	-0.487154	0	0	overlap
ENSG00000135744	cg19125606	-0.425528	1.29286e-11	5.65455e-06	-0.45742	2.75959e-12	1.20696e-06	overlap
ENSG00000135744	cg01083716	-0.369453	6.74938e-09	0.00295196	-0.378501	1.91788e-08	0.00838818	overlap
ENSG00000135744	cg24474852	-0.345574	6.59544e-08	0.0288464	-0.299442	1.11008e-05	1	fSpecific
ENSG00000135773	cg03980366	-0.529545	0	0	-0.591783	0	0	overlap
ENSG00000135773	cg03704061	-0.540634	0	0	-0.562663	0	0	overlap
ENSG00000135773	cg06585893	-0.495851	0	0	-0.652473	0	0	overlap
ENSG00000135773	cg12410939	-0.534129	0	0	-0.634813	0	0	overlap
ENSG00000135773	cg00563566	-0.580692	0	0	-0.651068	0	0	overlap
ENSG00000135773	cg24078695	-0.53589	0	0	-0.604051	0	0	overlap
ENSG00000135773	cg25344142	-0.487453	0	0	-0.532028	0	0	overlap
ENSG00000119280	cg02943290	-0.380306	2.24904e-09	0.000983658	-0.249087	0.000278052	1	fSpecific
ENSG00000119280	cg09107053	-0.402067	2.16526e-10	9.47017e-05	-0.338237	6.04423e-07	0.264355	fSpecific
ENSG00000119280	cg17282145	-0.353185	3.25318e-08	0.0142284	-0.284382	3.10084e-05	1	fSpecific
ENSG00000162946	cg09895514	0.437736	2.29904e-12	1.00553e-06	0.457578	2.68354e-12	1.17369e-06	overlap
ENSG00000162946	cg09186051	0.379313	2.49107e-09	0.00108951	0.450519	8.17177e-12	3.57407e-06	overlap
ENSG00000162946	cg23172853	0.425247	1.34116e-11	5.86579e-06	0.465522	3.98394e-13	1.74245e-07	overlap
ENSG00000162946	cg25203627	0.341357	9.68204e-08	0.0423461	0.447355	1.26949e-11	5.55236e-06	overlap
ENSG00000116991	cg02414710	0.341204	9.81643e-08	0.0429339	0.429136	1.17227e-10	5.12712e-05	overlap
ENSG00000116991	cg08658124	0.460615	0	0	0.448773	1.04542e-11	4.57233e-06	overlap
ENSG00000116991	cg07221695	0.343062	8.29558e-08	0.0362822	0.443272	2.17044e-11	9.49279e-06	overlap
ENSG00000116991	cg12077889	-0.412094	6.82128e-11	2.98341e-05	-0.276915	5.055e-05	1	fSpecific
ENSG00000116991	cg17733594	0.366645	8.90918e-09	0.00389659	0.296764	1.33805e-05	1	fSpecific
ENSG00000212916	cg02903907	-0.545815	0	0	-0.639177	0	0	overlap
ENSG00000212916	cg05460318	-0.611825	0	0	-0.595616	0	0	overlap
ENSG00000212916	cg06935979	-0.579111	0	0	-0.553507	0	0	overlap
ENSG00000212916	cg15542798	-0.408644	1.02181e-10	4.46907e-05	-0.560061	0	0	overlap
ENSG00000212916	cg16430166	-0.59383	0	0	-0.619677	0	0	overlap
ENSG00000212916	cg18196782	-0.421393	2.19676e-11	9.60794e-06	-0.547898	0	0	overlap
ENSG00000212916	cg00951395	-0.548822	0	0	-0.531046	0	0	overlap
ENSG00000135749	cg07220862	0.339919	1.10222e-07	0.0482075	0.438841	3.76992e-11	1.64884e-05	overlap
ENSG00000135749	cg14121020	-0.344759	7.10613e-08	0.0310799	-0.275025	5.70871e-05	1	fSpecific
ENSG00000135749	cg16056164	0.388929	9.1076e-10	0.000398337	0.424657	1.92981e-10	8.44039e-05	overlap
ENSG00000135749	cg00697486	0.416066	4.24029e-11	1.85457e-05	0.451406	7.18722e-12	3.14346e-06	overlap
ENSG00000135749	cg25003357	0.351369	3.8571e-08	0.0168697	0.407126	1.22165e-09	0.000534309	overlap
ENSG00000143674	cg04126810	-0.364778	1.07001e-08	0.00467986	-0.27865	4.51774e-05	1	fSpecific
ENSG00000135750	cg02581587	0.386213	1.21447e-09	0.00053117	0.534819	0	0	overlap
ENSG00000135750	cg05638287	-0.35768	2.12478e-08	0.00929312	-0.42008	3.17079e-10	0.00013868	overlap
ENSG00000135750	cg13110283	-0.423224	1.74135e-11	7.61609e-06	-0.301382	9.68553e-06	1	fSpecific
ENSG00000135750	cg00777689	-0.375543	3.66165e-09	0.00160149	-0.376043	2.39955e-08	0.0104949	overlap
ENSG00000135750	cg24809845	0.431478	5.7896e-12	2.53219e-06	0.551378	0	0	overlap
ENSG00000135750	cg25154916	-0.3542	2.95642e-08	0.0129304	-0.340498	5.03943e-07	0.220409	fSpecific
ENSG00000183780	cg04919681	0.352614	3.43263e-08	0.0150132	0.352531	1.87088e-07	0.0818262	fSpecific
ENSG00000183780	cg07185425	0.535136	0	0	0.606242	0	0	overlap
ENSG00000183780	cg10467711	-0.398021	3.39821e-10	0.000148627	-0.38976	6.70974e-09	0.00293462	overlap
ENSG00000183780	cg09674468	0.445074	6.33068e-13	2.76884e-07	0.336832	6.76222e-07	0.295758	fSpecific
ENSG00000183780	cg17451688	0.345531	6.62177e-08	0.0289615	0.452845	5.8016e-12	2.53743e-06	overlap
ENSG00000183780	cg16546432	-0.343605	7.89519e-08	0.034531	-0.297888	1.23749e-05	1	fSpecific
ENSG00000183780	cg20267718	0.475973	0	0	0.492349	0	0	overlap
ENSG00000183780	cg01420001	0.577073	0	0	0.623227	0	0	overlap
ENSG00000183780	cg23603573	0.414244	5.28138e-11	2.30991e-05	0.440276	3.16151e-11	1.38274e-05	overlap
ENSG00000168243	cg04020944	0.357661	2.12854e-08	0.00930954	0.504384	0	0	overlap
ENSG00000168243	cg22531801	-0.356003	2.49252e-08	0.0109015	-0.264389	0.000111373	1	fSpecific
ENSG00000116962	cg05946640	0.346727	5.93262e-08	0.0259474	0.301148	9.84707e-06	1	fSpecific
ENSG00000116962	cg09327855	0.361383	1.48861e-08	0.00651069	0.323122	1.9678e-06	0.860652	fSpecific
ENSG00000116962	cg24495667	0.355883	2.52112e-08	0.0110266	0.331266	1.04963e-06	0.459075	fSpecific
ENSG00000077585	cg23655242	0.373285	4.60007e-09	0.00201192	0.500249	0	0	overlap
ENSG00000086619	cg22425183	0.36336	1.22883e-08	0.00537449	0.387838	8.04991e-09	0.00352077	overlap
ENSG00000186197	cg04311403	-0.420707	2.39445e-11	1.04726e-05	-0.466301	2.87721e-13	1.2584e-07	overlap
ENSG00000186197	cg18281910	0.353681	3.10489e-08	0.0135798	0.395842	3.74006e-09	0.00163578	overlap
ENSG00000116977	cg03082060	-0.389223	8.82662e-10	0.000386048	-0.442044	2.5363e-11	1.1093e-05	overlap
ENSG00000198626	cg17436298	0.341437	9.61189e-08	0.0420393	0.287875	2.45559e-05	1	fSpecific
ENSG00000133019	cg04025049	0.342431	8.78448e-08	0.0384205	0.239628	0.000476474	1	fSpecific
ENSG00000133019	cg06160669	0.376493	3.3244e-09	0.00145399	0.357825	1.1945e-07	0.0522436	fSpecific
ENSG00000133019	cg06878499	0.382736	1.74812e-09	0.000764572	0.350598	2.19965e-07	0.0962055	fSpecific
ENSG00000133019	cg07162608	0.458149	0	0	0.563381	0	0	overlap
ENSG00000133019	cg09662616	0.402113	2.15404e-10	9.42108e-05	0.398941	2.76355e-09	0.00120869	overlap
ENSG00000133019	cg15108640	0.342199	8.9713e-08	0.0392376	0.403339	1.78795e-09	0.000781993	overlap
ENSG00000133019	cg17805202	0.442587	1.01923e-12	4.45779e-07	0.636149	0	0	overlap
ENSG00000133019	cg00783712	0.455186	0	0	0.548596	0	0	overlap
ENSG00000133019	cg22703515	0.351484	3.81598e-08	0.0166899	0.431908	8.55014e-11	3.73956e-05	overlap
ENSG00000133019	cg24479137	0.414723	4.98592e-11	2.18068e-05	0.488771	0	0	overlap
ENSG00000133019	cg24682621	0.36366	1.19349e-08	0.00521995	0.370711	3.87711e-08	0.0169572	overlap
ENSG00000133019	cg25388738	0.399601	2.85233e-10	0.000124752	0.510728	0	0	overlap
ENSG00000155816	cg07418387	0.344535	7.25356e-08	0.0317247	0.388285	7.71684e-09	0.0033751	overlap
ENSG00000155816	cg08641973	0.356411	2.39779e-08	0.0104872	0.383858	1.16943e-08	0.00511472	overlap
ENSG00000155816	cg14778267	0.344454	7.30706e-08	0.0319587	0.363606	7.25308e-08	0.0317226	overlap
ENSG00000155816	cg15392618	0.366821	8.7564e-09	0.00382977	0.423734	2.13506e-10	9.33809e-05	overlap
ENSG00000155816	cg22226821	0.360348	1.64494e-08	0.00719446	0.393393	4.73948e-09	0.0020729	overlap
ENSG00000182901	cg02668655	0.497324	0	0	0.560037	0	0	overlap
ENSG00000182901	cg08238568	0.524943	0	0	0.613084	0	0	overlap
ENSG00000182901	cg06833778	0.640843	0	0	0.611517	0	0	overlap
ENSG00000182901	cg09786278	0.430272	6.84553e-12	2.99402e-06	0.507261	0	0	overlap
ENSG00000182901	cg12461487	0.462466	0	0	0.545761	0	0	overlap
ENSG00000182901	cg11679177	-0.360029	1.69626e-08	0.0074189	-0.229793	0.000816435	1	fSpecific
ENSG00000182901	cg14038009	0.555826	0	0	0.543272	0	0	overlap
ENSG00000182901	cg22596806	0.579499	0	0	0.559731	0	0	overlap
ENSG00000182901	cg24523250	0.363403	1.22375e-08	0.00535228	0.602947	0	0	overlap
ENSG00000182901	cg26924247	0.580456	0	0	0.560177	0	0	overlap
ENSG00000182901	cg27293357	0.341823	9.28239e-08	0.0405982	0.449852	8.98704e-12	3.93064e-06	overlap
ENSG00000054277	cg08162224	-0.362988	1.27407e-08	0.00557237	-0.420306	3.09501e-10	0.000135366	overlap
ENSG00000054277	cg26687670	-0.390039	8.09037e-10	0.000353847	-0.377275	2.14509e-08	0.00938196	overlap
ENSG00000203668	cg08162224	-0.379325	2.48799e-09	0.00108817	-0.379127	1.81099e-08	0.00792071	overlap
ENSG00000203668	cg26687670	-0.355693	2.5671e-08	0.0112277	-0.353741	1.68968e-07	0.073901	fSpecific
ENSG00000197769	cg24074785	-0.35203	3.62569e-08	0.0158576	-0.254823	0.000198579	1	fSpecific
ENSG00000180287	cg02567839	0.498839	0	0	0.511311	0	0	overlap
ENSG00000180287	cg03002586	0.419936	2.63651e-11	1.15313e-05	0.470927	0	0	overlap
ENSG00000180287	cg04205107	-0.47086	0	0	-0.470513	0	0	overlap
ENSG00000180287	cg08659667	-0.348947	4.83257e-08	0.0211361	-0.448284	1.11838e-11	4.89142e-06	overlap
ENSG00000180287	cg12613383	-0.432098	5.30558e-12	2.32049e-06	-0.392508	5.16037e-09	0.00225698	overlap
ENSG00000180287	cg12636785	0.626693	0	0	0.579952	0	0	overlap
ENSG00000180287	cg12402831	0.467945	0	0	0.439689	3.39843e-11	1.48637e-05	overlap
ENSG00000180287	cg17150265	0.628497	0	0	0.591497	0	0	overlap
ENSG00000180287	cg20308540	0.394892	4.79028e-10	0.000209511	0.434062	6.66218e-11	2.91383e-05	overlap
ENSG00000180287	cg18220921	-0.425574	1.28523e-11	5.62117e-06	-0.467177	1.78899e-13	7.82448e-08	overlap
ENSG00000180287	cg00812833	-0.369076	7.0064e-09	0.00306438	-0.479714	0	0	overlap
ENSG00000180287	cg00340127	0.432417	5.07112e-12	2.21795e-06	0.452481	6.12889e-12	2.68058e-06	overlap
ENSG00000180287	cg01664666	-0.378646	2.66788e-09	0.00116684	-0.493006	0	0	overlap
ENSG00000180287	cg22679728	-0.377702	2.93873e-09	0.00128531	-0.308637	5.76697e-06	1	fSpecific
ENSG00000179456	cg13360230	-0.371084	5.73686e-09	0.00250912	-0.323039	1.98025e-06	0.8661	fSpecific
ENSG00000179456	cg01105418	-0.3757	3.60369e-09	0.00157614	-0.155393	0.024403	1	fSpecific
ENSG00000179456	cg01069808	-0.44719	3.99507e-13	1.74731e-07	-0.311905	4.54601e-06	1	fSpecific
ENSG00000179456	cg23829949	-0.436319	2.86082e-12	1.25123e-06	-0.221285	0.00127847	1	fSpecific
ENSG00000162849	cg04014586	0.348007	5.27214e-08	0.0230586	0.323253	1.94829e-06	0.85212	fSpecific
ENSG00000162849	cg03937966	0.36427	1.12453e-08	0.00491831	0.273949	6.11531e-05	1	fSpecific
ENSG00000162849	cg03896752	0.409593	9.14931e-11	4.00161e-05	0.41279	6.83723e-10	0.000299039	overlap
ENSG00000162849	cg04992425	0.363106	1.25961e-08	0.00550911	0.315956	3.3723e-06	1	fSpecific
ENSG00000162849	cg18141646	0.341345	9.69256e-08	0.0423922	0.352086	1.942e-07	0.0849367	fSpecific
ENSG00000162849	cg22257101	0.407962	1.10575e-10	4.83619e-05	0.398455	2.89851e-09	0.00126772	overlap
ENSG00000162849	cg22729008	0.346547	6.03186e-08	0.0263814	0.272554	6.68363e-05	1	fSpecific
ENSG00000162849	cg21400442	0.359297	1.81998e-08	0.00795999	0.362427	8.03628e-08	0.0351481	overlap
ENSG00000162849	cg24490133	0.383284	1.6512e-09	0.00072218	0.347713	2.79521e-07	0.122254	fSpecific
ENSG00000162849	cg25035939	0.346638	5.98128e-08	0.0261602	0.276016	5.35662e-05	1	fSpecific
ENSG00000162849	cg23014549	0.383755	1.57203e-09	0.000687554	0.274501	5.90334e-05	1	fSpecific
ENSG00000162849	cg26434800	0.346784	5.90191e-08	0.025813	0.331674	1.01662e-06	0.444635	fSpecific
ENSG00000162849	cg25730298	0.376739	3.24215e-09	0.00141801	0.362191	8.2024e-08	0.0358747	overlap
ENSG00000162849	cg25143359	0.37606	3.47404e-09	0.00151943	0.40791	1.12824e-09	0.000493457	overlap
ENSG00000197472	cg02236896	0.397094	3.76399e-10	0.000164625	0.561695	0	0	overlap
ENSG00000197472	cg04305539	-0.514674	0	0	-0.542161	0	0	overlap
ENSG00000197472	cg20324884	-0.509332	0	0	-0.572668	0	0	overlap
ENSG00000197472	cg21740146	-0.531685	0	0	-0.57033	0	0	overlap
ENSG00000197472	cg22385719	-0.516788	0	0	-0.545046	0	0	overlap
ENSG00000197472	cg22502715	-0.543778	0	0	-0.603015	0	0	overlap
ENSG00000197472	cg21583155	0.339988	1.09536e-07	0.0479077	0.437424	4.47405e-11	1.95681e-05	overlap
ENSG00000197472	cg23027521	-0.54433	0	0	-0.587006	0	0	overlap
ENSG00000197472	cg26826871	-0.538519	0	0	-0.552165	0	0	overlap
ENSG00000197472	cg25794766	-0.555871	0	0	-0.593061	0	0	overlap
ENSG00000135747	cg02236896	0.403181	1.90975e-10	8.35264e-05	0.557853	0	0	overlap
ENSG00000135747	cg04305539	-0.400317	2.63381e-10	0.000115195	-0.459468	1.88927e-12	8.26306e-07	overlap
ENSG00000135747	cg20324884	-0.454455	2.10569e-15	9.20962e-10	-0.534867	0	0	overlap
ENSG00000135747	cg21740146	-0.440121	1.56385e-12	6.8398e-07	-0.527475	0	0	overlap
ENSG00000135747	cg22385719	-0.438587	2.009e-12	8.78671e-07	-0.459459	1.89261e-12	8.27768e-07	overlap
ENSG00000135747	cg22502715	-0.490563	0	0	-0.554053	0	0	overlap
ENSG00000135747	cg23027521	-0.486685	0	0	-0.541995	0	0	overlap
ENSG00000135747	cg26826871	-0.480578	0	0	-0.491919	0	0	overlap
ENSG00000135747	cg25794766	-0.488012	0	0	-0.56534	0	0	overlap
ENSG00000184731	cg14255256	-0.363471	1.21562e-08	0.00531674	-0.319867	2.51748e-06	1	fSpecific
ENSG00000184731	cg15237857	-0.370547	6.05296e-09	0.00264737	-0.160788	0.0198248	1	fSpecific
ENSG00000184731	cg15574509	-0.366847	8.7341e-09	0.00382002	-0.333377	8.89309e-07	0.388955	fSpecific
ENSG00000184731	cg20318662	-0.419715	2.71e-11	1.18527e-05	-0.280301	4.05692e-05	1	fSpecific
ENSG00000184731	cg27106476	-0.359726	1.74648e-08	0.00763854	-0.20671	0.00265656	1	fSpecific
ENSG00000035115	cg13354988	-0.419516	2.77776e-11	1.2149e-05	-0.223174	0.00115889	1	fSpecific
ENSG00000172554	cg05978707	0.365405	1.0063e-08	0.00440125	0.392061	5.38645e-09	0.00235586	overlap
ENSG00000172554	cg06288198	0.370172	6.28318e-09	0.00274806	0.4068	1.26271e-09	0.000552268	overlap
ENSG00000172554	cg10325383	0.366787	8.78595e-09	0.00384269	0.298224	1.20876e-05	1	fSpecific
ENSG00000172554	cg09062961	0.370229	6.2474e-09	0.00273241	0.398005	3.02903e-09	0.0013248	overlap
ENSG00000172554	cg13049247	0.341384	9.65779e-08	0.0422401	0.239378	0.000483174	1	fSpecific
ENSG00000172554	cg00095772	0.396557	3.99248e-10	0.000174618	0.386167	9.42243e-09	0.00412107	overlap
ENSG00000172554	cg23487759	0.354137	2.97401e-08	0.0130074	0.409205	9.88838e-10	0.000432486	overlap
ENSG00000172554	cg22075362	0.353475	3.1655e-08	0.0138449	0.287769	2.47318e-05	1	fSpecific
ENSG00000115705	cg04319651	0.401291	2.36221e-10	0.000103316	0.399753	2.55131e-09	0.00111586	overlap
ENSG00000115705	cg05090359	0.357082	2.24957e-08	0.00983888	0.398667	2.83873e-09	0.00124157	overlap
ENSG00000115705	cg10672136	0.340611	1.03558e-07	0.0452929	0.397378	3.22058e-09	0.00140858	overlap
ENSG00000115705	cg09614210	0.505215	0	0	0.430541	9.9975e-11	4.37258e-05	overlap
ENSG00000115705	cg23239637	0.361167	1.52006e-08	0.00664827	0.440322	3.14385e-11	1.37502e-05	overlap
ENSG00000115705	cg24215279	0.353202	3.24809e-08	0.0142061	0.334434	8.18091e-07	0.357807	fSpecific
ENSG00000115705	cg21913853	0.50476	0	0	0.478536	0	0	overlap
ENSG00000115705	cg26510473	0.463833	0	0	0.492951	0	0	overlap
ENSG00000130508	cg03591285	0.485796	0	0	0.41094	8.27712e-10	0.000362015	overlap
ENSG00000130508	cg03267487	0.39877	3.12802e-10	0.00013681	0.340987	4.84445e-07	0.211881	fSpecific
ENSG00000130508	cg05241015	-0.381607	1.96567e-09	0.000859722	-0.243729	0.000378191	1	fSpecific
ENSG00000130508	cg19517718	-0.360905	1.55897e-08	0.00681843	-0.217375	0.00156265	1	fSpecific
ENSG00000130508	cg00682069	0.394482	5.00937e-10	0.000219094	0.320342	2.4289e-06	1	fSpecific
ENSG00000130508	cg24129977	-0.369378	6.7998e-09	0.00297401	-0.220254	0.00134835	1	fSpecific
ENSG00000118004	cg08239899	0.346869	5.85586e-08	0.0256117	0.31749	3.00831e-06	1	fSpecific
ENSG00000118004	cg09256862	0.385818	1.26605e-09	0.000553732	0.373552	3.00549e-08	0.013145	overlap
ENSG00000118004	cg14926093	0.367853	7.90882e-09	0.00345907	0.29806	1.22272e-05	1	fSpecific
ENSG00000118004	cg20362060	0.391714	6.75904e-10	0.000295619	0.423725	2.13718e-10	9.34735e-05	overlap
ENSG00000118004	cg01745480	0.425684	1.26671e-11	5.54019e-06	0.344231	3.72141e-07	0.162763	fSpecific
ENSG00000118004	cg02093176	0.392541	6.18263e-10	0.000270408	0.420627	2.98999e-10	0.000130773	overlap
ENSG00000118004	cg24048627	0.388524	9.50875e-10	0.000415883	0.312635	4.30928e-06	1	fSpecific
ENSG00000118004	cg23859888	0.500061	0	0	0.435812	5.4225e-11	2.37163e-05	overlap
ENSG00000118004	cg27472937	0.364826	1.06508e-08	0.00465833	0.361723	8.54173e-08	0.0373588	overlap
ENSG00000176887	cg06830064	0.355604	2.5888e-08	0.0113226	0.366473	5.64287e-08	0.0246801	overlap
ENSG00000176887	cg08526991	-0.387584	1.0506e-09	0.000459499	-0.294722	1.54099e-05	1	fSpecific
ENSG00000176887	cg08432727	-0.346902	5.83794e-08	0.0255333	-0.240592	0.000451444	1	fSpecific
ENSG00000176887	cg19958021	0.369737	6.56096e-09	0.00286955	0.347547	2.8338e-07	0.123941	fSpecific
ENSG00000176887	cg26584747	0.356003	2.49252e-08	0.0109015	0.329173	1.23565e-06	0.540434	fSpecific
ENSG00000134326	cg01028142	-0.409017	9.78416e-11	4.27928e-05	-0.334372	8.22124e-07	0.359571	fSpecific
ENSG00000134321	cg00186143	0.347004	5.78351e-08	0.0252952	0.315154	3.57894e-06	1	fSpecific
ENSG00000115738	cg27310311	0.413235	5.95753e-11	2.60563e-05	0.490202	0	0	overlap
ENSG00000143797	cg23418201	-0.435695	3.1437e-12	1.37495e-06	-0.310595	5.00252e-06	1	fSpecific
ENSG00000151693	cg05088820	-0.36197	1.40637e-08	0.00615102	-0.300492	1.03123e-05	1	fSpecific
ENSG00000151693	cg05159685	0.448215	3.10946e-13	1.35998e-07	0.364689	6.5987e-08	0.0288606	overlap
ENSG00000151693	cg19458697	0.414853	4.90895e-11	2.14702e-05	0.329573	1.19778e-06	0.52387	fSpecific
ENSG00000134317	cg10162971	-0.419611	2.7451e-11	1.20062e-05	-0.327143	1.446e-06	0.632435	fSpecific
ENSG00000134317	cg14124917	-0.38139	2.01044e-09	0.000879303	-0.348488	2.62154e-07	0.114658	fSpecific
ENSG00000172059	cg20702913	-0.358767	1.91486e-08	0.008375	-0.418936	3.58343e-10	0.000156728	overlap
ENSG00000172059	cg18825594	-0.350074	4.35214e-08	0.0190349	-0.297433	1.27731e-05	1	fSpecific
ENSG00000115756	cg16246488	-0.376487	3.32659e-09	0.00145495	-0.394494	4.26225e-09	0.00186417	overlap
ENSG00000115756	cg18969008	-0.385932	1.25098e-09	0.00054714	-0.322883	2.00381e-06	0.876405	fSpecific
ENSG00000115758	cg15075241	-0.542302	0	0	-0.575765	0	0	overlap
ENSG00000115758	cg00301677	-0.421226	2.24352e-11	9.81245e-06	-0.465722	3.68706e-13	1.6126e-07	overlap
ENSG00000115758	cg26236235	-0.446964	4.21068e-13	1.84161e-07	-0.555924	0	0	overlap
ENSG00000196208	cg04699394	0.384592	1.44008e-09	0.000629845	0.452705	5.92562e-12	2.59168e-06	overlap
ENSG00000196208	cg08034990	0.473498	0	0	0.492478	0	0	overlap
ENSG00000196208	cg07596106	0.507658	0	0	0.545788	0	0	overlap
ENSG00000196208	cg06190461	0.401439	2.32337e-10	0.000101617	0.468515	4.07498e-14	1.78227e-08	overlap
ENSG00000196208	cg13396044	0.544533	0	0	0.538871	0	0	overlap
ENSG00000196208	cg24399204	0.375999	3.49566e-09	0.00152889	0.380623	1.57817e-08	0.00690241	overlap
ENSG00000196208	cg24737570	0.406462	1.31444e-10	5.74896e-05	0.612436	0	0	overlap
ENSG00000134324	cg11466832	-0.352557	3.45085e-08	0.0150929	-0.220289	0.00134592	1	fSpecific
ENSG00000134324	cg02069619	-0.40691	1.24843e-10	5.46023e-05	-0.211824	0.00206607	1	fSpecific
ENSG00000134324	cg00523161	-0.44439	7.25812e-13	3.17447e-07	-0.304166	7.95092e-06	1	fSpecific
ENSG00000134324	cg21579399	-0.369987	6.39997e-09	0.00279914	-0.305432	7.26365e-06	1	fSpecific
ENSG00000071575	cg13221363	-0.420818	2.36139e-11	1.0328e-05	-0.392769	5.03291e-09	0.00220123	overlap
ENSG00000071575	cg13359772	0.349779	4.4736e-08	0.0195661	0.446098	1.50243e-11	6.57116e-06	overlap
ENSG00000071575	cg15241074	-0.415337	4.63124e-11	2.02556e-05	-0.290566	2.04744e-05	1	fSpecific
ENSG00000162981	cg04063216	-0.446618	4.55463e-13	1.99205e-07	-0.257056	0.000173837	1	fSpecific
ENSG00000162981	cg02746381	-0.386221	1.21352e-09	0.000530756	-0.391411	5.73253e-09	0.00250722	overlap
ENSG00000162981	cg07622996	-0.413029	6.10482e-11	2.67006e-05	-0.256503	0.000179685	1	fSpecific
ENSG00000162981	cg05602862	-0.443235	9.04986e-13	3.95812e-07	-0.336616	6.87986e-07	0.300903	fSpecific
ENSG00000162981	cg05446424	-0.357331	2.19666e-08	0.00960747	-0.184523	0.00741038	1	fSpecific
ENSG00000162981	cg10138494	-0.437985	2.21055e-12	9.66824e-07	-0.255752	0.000187908	1	fSpecific
ENSG00000162981	cg11007759	-0.434689	3.65114e-12	1.59689e-06	-0.30704	6.47188e-06	1	fSpecific
ENSG00000162981	cg14190151	0.452419	6.88715e-14	3.01222e-08	0.394833	4.12457e-09	0.00180396	overlap
ENSG00000162981	cg14225485	-0.397569	3.57205e-10	0.00015623	-0.262557	0.000124626	1	fSpecific
ENSG00000162981	cg14125423	0.401649	2.26932e-10	9.92528e-05	0.48647	0	0	overlap
ENSG00000162981	cg12050497	-0.351112	3.95087e-08	0.0172798	-0.313883	3.93135e-06	1	fSpecific
ENSG00000162981	cg11533098	-0.393107	5.81567e-10	0.000254359	-0.229861	0.000813432	1	fSpecific
ENSG00000162981	cg13021841	-0.442188	1.09518e-12	4.78995e-07	-0.374406	2.78277e-08	0.012171	overlap
ENSG00000162981	cg16846645	-0.577587	0	0	-0.462157	1.06433e-12	4.65506e-07	overlap
ENSG00000162981	cg14789259	-0.468948	0	0	-0.425559	1.74738e-10	7.64249e-05	overlap
ENSG00000162981	cg18515527	0.425049	1.37615e-11	6.01884e-06	0.458612	2.22398e-12	9.72698e-07	overlap
ENSG00000162981	cg02311414	-0.342433	8.783e-08	0.0384141	-0.23113	0.000759756	1	fSpecific
ENSG00000162981	cg00478246	-0.406582	1.29643e-10	5.67016e-05	-0.182266	0.00817802	1	fSpecific
ENSG00000162981	cg23062198	-0.509838	0	0	-0.421848	2.62118e-10	0.000114642	overlap
ENSG00000162981	cg22044566	-0.340783	1.01964e-07	0.0445958	-0.192311	0.00523124	1	fSpecific
ENSG00000162981	cg26633107	-0.520682	0	0	-0.426306	1.60866e-10	7.03577e-05	overlap
ENSG00000162981	cg25765130	-0.401361	2.34368e-10	0.000102505	-0.273077	6.46486e-05	1	fSpecific
ENSG00000134323	cg20431766	-0.340512	1.04486e-07	0.0456986	-0.454289	4.64246e-12	2.03046e-06	overlap
ENSG00000214842	cg23101885	0.397802	3.48143e-10	0.000152266	0.345356	3.39401e-07	0.148443	fSpecific
ENSG00000170745	cg08187110	0.400206	2.66661e-10	0.000116629	0.461462	1.24824e-12	5.45942e-07	overlap
ENSG00000170745	cg05417035	0.450203	1.75371e-13	7.67019e-08	0.543699	0	0	overlap
ENSG00000170745	cg16234068	0.341261	9.76654e-08	0.0427157	0.28527	2.92294e-05	1	fSpecific
ENSG00000170745	cg21649713	0.374161	4.21129e-09	0.00184188	0.50295	0	0	overlap
ENSG00000170745	cg22330841	0.370901	5.84275e-09	0.00255543	0.347545	2.8344e-07	0.123968	fSpecific
ENSG00000170745	cg25420747	0.342207	8.96454e-08	0.039208	0.564095	0	0	overlap
[truncated: 21,762 more rows]

## Sheet: LUSC
Ename	Mname	corr.f	corrpval.f	bonf.f	corr.m	corrpval.m	bonf.m	label
ENSG00000162571	cg03003746	-0.588048	1.41371e-09	0.000642299	-0.284048	2.88037e-06	1	fSpecific
ENSG00000162571	cg13362546	-0.574087	5.66841e-09	0.00257536	-0.324922	7.43154e-08	0.0337641	overlap
ENSG00000162571	cg14161399	-0.539351	6.9613e-08	0.0316276	-0.25493	2.83825e-05	1	fSpecific
ENSG00000162576	cg15386434	0.565428	1.13387e-08	0.00515156	0.417621	1.65287e-12	7.50959e-07	overlap
ENSG00000235098	cg15633699	-0.660765	0	0	-0.524381	0	0	overlap
ENSG00000235098	cg15823872	-0.641651	0	0	-0.65401	0	0	overlap
ENSG00000235098	cg00060374	-0.556571	2.17184e-08	0.00986743	-0.496417	0	0	overlap
ENSG00000235098	cg23894219	-0.647265	0	0	-0.681504	0	0	overlap
ENSG00000149527	cg08615111	0.65385	0	0	0.569606	0	0	overlap
ENSG00000149527	cg11390151	0.549508	3.54642e-08	0.0161126	0.540504	0	0	overlap
ENSG00000149527	cg25880537	0.534576	9.46223e-08	0.0429902	0.459796	0	0	overlap
ENSG00000142611	cg06824308	0.556176	2.23351e-08	0.0101476	0.409992	4.96708e-12	2.25672e-06	overlap
ENSG00000142611	cg10391102	0.610421	0	0	0.54541	0	0	overlap
ENSG00000142611	cg15059176	0.56039	1.65021e-08	0.00749748	0.459535	0	0	overlap
ENSG00000142611	cg17137218	0.571569	6.98979e-09	0.0031757	0.560642	0	0	overlap
ENSG00000142611	cg17421241	0.575931	4.83702e-09	0.00219763	0.446131	0	0	overlap
ENSG00000142611	cg17861161	0.55285	2.8192e-08	0.0128086	0.40719	7.2882e-12	3.31129e-06	overlap
ENSG00000142611	cg18396811	0.583455	2.37344e-09	0.00107834	0.408349	6.2263e-12	2.82882e-06	overlap
ENSG00000142611	cg00706913	0.58306	2.47231e-09	0.00112326	0.600259	0	0	overlap
ENSG00000142611	cg01196079	0.586912	1.62123e-09	0.000736581	0.473636	0	0	overlap
ENSG00000142611	cg20699701	0.535712	8.80039e-08	0.0399833	0.38063	2.01591e-10	9.15899e-05	overlap
ENSG00000142611	cg27523417	0.563535	1.30815e-08	0.00594337	0.414869	2.48605e-12	1.1295e-06	overlap
ENSG00000196581	cg04292104	0.589316	1.20242e-09	0.000546303	0.488231	0	0	overlap
ENSG00000196581	cg11408632	0.579586	3.47534e-09	0.00157897	0.411277	4.15266e-12	1.8867e-06	overlap
ENSG00000196581	cg15088574	0.559024	1.8222e-08	0.00827888	0.469092	0	0	overlap
ENSG00000196581	cg16360868	0.608264	0	0	0.496117	0	0	overlap
ENSG00000196581	cg16386806	0.572622	6.40911e-09	0.00291188	0.554831	0	0	overlap
ENSG00000196581	cg19821682	0.555287	2.37811e-08	0.0108046	0.479028	0	0	overlap
ENSG00000196581	cg00692462	0.634622	0	0	0.503563	0	0	overlap
ENSG00000196581	cg00859330	0.648516	0	0	0.579837	0	0	overlap
ENSG00000196581	cg21159274	0.641783	0	0	0.51025	0	0	overlap
ENSG00000196581	cg20995977	0.543433	5.32844e-08	0.024209	0.432394	1.13485e-13	5.15604e-08	overlap
ENSG00000196581	cg21267167	0.62853	0	0	0.394953	3.56636e-11	1.62032e-05	overlap
ENSG00000196581	cg24694502	0.68508	0	0	0.541252	0	0	overlap
ENSG00000196581	cg26435172	0.632152	0	0	0.506334	0	0	overlap
ENSG00000196581	cg26231761	0.689871	0	0	0.579124	0	0	overlap
ENSG00000196581	cg26353694	0.53721	7.99388e-08	0.036319	0.440645	0	0	overlap
ENSG00000171612	cg09058554	-0.542182	5.78621e-08	0.0262888	-0.444491	0	0	overlap
ENSG00000142657	cg04909257	-0.605894	0	0	-0.645172	0	0	overlap
ENSG00000130940	cg17177074	-0.55611	2.24394e-08	0.010195	-0.281142	3.66141e-06	1	fSpecific
ENSG00000116661	cg05796704	-0.614932	0	0	-0.568181	0	0	overlap
ENSG00000162496	cg16432031	-0.693345	0	0	-0.673624	0	0	overlap
ENSG00000162493	cg21158795	0.600296	4.51097e-11	2.04949e-05	0.53678	0	0	overlap
ENSG00000173641	cg21214613	-0.546923	4.22338e-08	0.0191883	-0.423951	6.02514e-13	2.73743e-07	overlap
ENSG00000142619	cg06878808	-0.581199	2.97811e-09	0.00135306	-0.613858	0	0	overlap
ENSG00000142619	cg12858514	-0.620035	0	0	-0.571472	0	0	overlap
ENSG00000009709	cg02178648	0.597185	2.74003e-10	0.000124489	0.549759	0	0	overlap
ENSG00000009709	cg06220449	0.533885	9.88772e-08	0.0449234	0.53221	0	0	overlap
ENSG00000009709	cg08126203	0.633189	0	0	0.43088	1.61097e-13	7.31919e-08	overlap
ENSG00000009709	cg07221967	0.584673	2.08607e-09	0.000947774	0.437626	1.84424e-14	8.37902e-09	overlap
ENSG00000009709	cg09791440	0.64096	0	0	0.487887	0	0	overlap
ENSG00000009709	cg09366342	0.614422	0	0	0.406767	7.71664e-12	3.50594e-06	overlap
ENSG00000009709	cg15505287	0.623427	0	0	0.461922	0	0	overlap
ENSG00000009709	cg15213210	0.537688	7.75181e-08	0.0352192	0.298705	8.25153e-07	0.374896	fSpecific
ENSG00000009709	cg15685834	0.636482	0	0	0.374793	3.96384e-10	0.000180091	overlap
ENSG00000009709	cg24662698	0.604494	0	0	0.396878	2.79949e-11	1.27191e-05	overlap
ENSG00000162482	cg07037032	-0.542182	5.78621e-08	0.0262888	-0.371411	5.82528e-10	0.000264663	overlap
ENSG00000133216	cg04099056	0.602897	0	0	0.537074	0	0	overlap
ENSG00000133216	cg05228361	0.601432	0	0	0.508611	0	0	overlap
ENSG00000204219	cg00463859	-0.623361	0	0	-0.584136	0	0	overlap
ENSG00000117318	cg11336311	-0.53372	9.99165e-08	0.0453956	-0.296864	9.69084e-07	0.440289	fSpecific
ENSG00000117308	cg00988350	-0.578335	3.90246e-09	0.00177302	-0.474394	0	0	overlap
ENSG00000117308	cg25549791	-0.538626	7.29591e-08	0.0331479	-0.453305	0	0	overlap
ENSG00000117643	cg19897113	0.57794	4.04542e-09	0.00183797	0.532097	0	0	overlap
ENSG00000142910	cg03211098	-0.535152	9.12088e-08	0.0414393	-0.477721	0	0	overlap
ENSG00000175130	cg00292107	-0.579454	3.51853e-09	0.00159859	-0.488092	0	0	overlap
ENSG00000121904	cg22599122	0.539811	6.75592e-08	0.0306945	0.324784	7.53075e-08	0.0342148	overlap
ENSG00000158315	cg23257461	-0.536074	8.59869e-08	0.0390669	-0.464907	0	0	overlap
ENSG00000116990	cg16163765	-0.577067	4.37562e-09	0.001988	-0.484131	0	0	overlap
ENSG00000179862	cg04011995	-0.564555	1.21148e-08	0.00550417	-0.303124	5.586e-07	0.253792	fSpecific
ENSG00000253313	cg09988116	-0.623509	0	0	-0.439396	2.31551e-15	1.05202e-09	overlap
ENSG00000253313	cg01413566	-0.615953	0	0	-0.498701	0	0	overlap
ENSG00000117407	cg16996266	-0.595094	4.65942e-10	0.000211694	-0.489988	0	0	overlap
ENSG00000117407	cg01891209	-0.598238	1.8944e-10	8.60693e-05	-0.408548	6.05904e-12	2.75283e-06	overlap
ENSG00000117407	cg26074140	-0.561131	1.56317e-08	0.00710201	-0.497903	0	0	overlap
ENSG00000171357	cg19856273	-0.568655	8.83075e-09	0.00401212	-0.557177	0	0	overlap
ENSG00000171357	cg24542714	-0.698267	0	0	-0.689964	0	0	overlap
ENSG00000142961	cg18690385	-0.597415	2.54845e-10	0.000115785	-0.516661	0	0	overlap
ENSG00000186564	cg08260398	0.545804	4.55217e-08	0.0206821	0.42685	3.60984e-13	1.64008e-07	overlap
ENSG00000132122	cg24862246	0.613977	0	0	0.489766	0	0	overlap
ENSG00000162373	cg10501310	0.576672	4.53195e-09	0.00205902	0.467382	0	0	overlap
ENSG00000162373	cg09850418	0.57547	5.03497e-09	0.00228756	0.575853	0	0	overlap
ENSG00000142700	cg04431629	-0.589513	1.17131e-09	0.000532168	-0.431397	1.43489e-13	6.51923e-08	overlap
ENSG00000142700	cg06645033	-0.621369	0	0	-0.388572	7.82349e-11	3.55448e-05	overlap
ENSG00000142700	cg09846084	-0.576639	4.54517e-09	0.00206503	-0.557959	0	0	overlap
ENSG00000142700	cg12285988	-0.614043	0	0	-0.396162	3.06428e-11	1.39221e-05	overlap
ENSG00000142700	cg17800654	-0.726304	0	0	-0.607609	0	0	overlap
ENSG00000142700	cg18198999	-0.597448	2.52139e-10	0.000114556	-0.430761	1.65349e-13	7.51238e-08	overlap
ENSG00000142700	cg26560222	-0.606569	0	0	-0.515975	0	0	overlap
ENSG00000116157	cg02453146	-0.569593	8.19775e-09	0.00372453	-0.664486	0	0	overlap
ENSG00000116157	cg12640469	-0.603852	0	0	-0.627423	0	0	overlap
ENSG00000116157	cg23272399	-0.588855	1.27689e-09	0.000580134	-0.675701	0	0	overlap
ENSG00000203995	cg06335143	-0.610207	0	0	-0.493691	0	0	overlap
ENSG00000203995	cg18184411	-0.611656	0	0	-0.527271	0	0	overlap
ENSG00000203995	cg00397635	-0.557114	2.08957e-08	0.00949363	-0.497929	0	0	overlap
ENSG00000143001	cg26897025	0.533342	1.02346e-07	0.0464994	0.380402	2.07039e-10	9.4065e-05	overlap
ENSG00000162599	cg09062708	-0.535679	8.81895e-08	0.0400676	-0.384062	1.3444e-10	6.1081e-05	overlap
ENSG00000187140	cg13906377	0.624925	0	0	0.457149	0	0	overlap
ENSG00000187140	cg01067151	0.558497	1.89269e-08	0.00859915	0.434262	6.91607e-14	3.14221e-08	overlap
ENSG00000116675	cg26548682	0.572918	6.25321e-09	0.00284105	0.573909	0	0	overlap
ENSG00000184588	cg23045908	-0.596839	3.03454e-10	0.00013787	-0.514932	0	0	overlap
ENSG00000081985	cg11132246	-0.538741	7.24169e-08	0.0329015	-0.513236	0	0	overlap
ENSG00000081985	cg19745415	-0.559369	1.77723e-08	0.00807458	-0.509691	0	0	overlap
ENSG00000081985	cg01356829	-0.604774	0	0	-0.533794	0	0	overlap
ENSG00000137960	cg00347563	-0.543483	5.31108e-08	0.0241301	-0.495797	0	0	overlap
ENSG00000137960	cg24496666	-0.541145	6.19324e-08	0.028138	-0.485157	0	0	overlap
ENSG00000117133	cg02078520	-0.552603	2.86783e-08	0.0130296	-0.306178	4.24994e-07	0.19309	fSpecific
ENSG00000171517	cg10776377	-0.563074	1.35398e-08	0.00615162	-0.326021	6.68488e-08	0.0303718	overlap
ENSG00000143013	cg10574861	-0.60619	0	0	-0.537041	0	0	overlap
ENSG00000143013	cg19161251	-0.746586	0	0	-0.694207	0	0	overlap
ENSG00000143013	cg20701183	-0.673523	0	0	-0.627994	0	0	overlap
ENSG00000137948	cg14732540	-0.549623	3.51871e-08	0.0159867	-0.415574	2.24221e-12	1.01872e-06	overlap
ENSG00000023909	cg22807700	-0.605104	0	0	-0.485684	0	0	overlap
ENSG00000198691	cg25196715	-0.537507	7.84281e-08	0.0356326	-0.42151	9.01864e-13	4.09749e-07	overlap
ENSG00000117525	cg15026743	-0.606947	0	0	-0.606611	0	0	overlap
ENSG00000162639	cg08460435	-0.579816	3.40074e-09	0.00154507	-0.267794	1.06611e-05	1	fSpecific
ENSG00000162639	cg11947712	-0.566547	1.04066e-08	0.0047281	-0.630795	0	0	overlap
ENSG00000162639	cg00328227	-0.592625	7.39738e-10	0.000336089	-0.597962	0	0	overlap
ENSG00000162639	cg24737783	-0.545178	4.7461e-08	0.0215632	-0.622079	0	0	overlap
ENSG00000143126	cg16590319	-0.591736	8.52434e-10	0.000387291	-0.486104	0	0	overlap
ENSG00000162777	cg08663890	-0.575141	5.18031e-09	0.0023536	-0.404505	1.04401e-11	4.7433e-06	overlap
ENSG00000171385	cg04843968	0.638523	0	0	0.512995	0	0	overlap
ENSG00000171385	cg17711754	0.687369	0	0	0.636651	0	0	overlap
ENSG00000171385	cg17898124	0.628316	0	0	0.532551	0	0	overlap
ENSG00000171385	cg22040158	0.59544	4.31842e-10	0.000196201	0.493498	0	0	overlap
ENSG00000171385	cg27510354	0.532502	1.07933e-07	0.0490377	0.430383	1.79446e-13	8.15284e-08	overlap
ENSG00000134259	cg04237618	0.623526	0	0	0.40625	8.27268e-12	3.75857e-06	overlap
ENSG00000092607	cg02177231	-0.665901	0	0	-0.608019	0	0	overlap
ENSG00000092607	cg21392341	-0.537885	7.65366e-08	0.0347733	-0.507107	0	0	overlap
ENSG00000092607	cg23588217	-0.659859	0	0	-0.609754	0	0	overlap
ENSG00000163141	cg11584936	-0.722237	0	0	-0.730459	0	0	overlap
ENSG00000213190	cg13842305	-0.619986	0	0	-0.589141	0	0	overlap
ENSG00000159445	cg05927068	-0.57412	5.65261e-09	0.00256818	-0.433254	9.13168e-14	4.14884e-08	overlap
ENSG00000163220	cg16139316	-0.557246	2.07005e-08	0.00940496	-0.421792	8.61723e-13	3.91511e-07	overlap
ENSG00000197956	cg16291048	-0.585578	1.88867e-09	0.000858087	-0.588065	0	0	overlap
ENSG00000196154	cg23048494	-0.549541	3.53848e-08	0.0160765	-0.432033	1.23787e-13	5.62408e-08	overlap
ENSG00000196754	cg00647881	-0.552471	2.89409e-08	0.0131489	-0.593313	0	0	overlap
ENSG00000188643	cg12274898	-0.544685	4.9046e-08	0.0222833	-0.498282	0	0	overlap
ENSG00000188643	cg23851011	-0.650607	0	0	-0.543301	0	0	overlap
ENSG00000189334	cg13098855	-0.612923	0	0	-0.534766	0	0	overlap
ENSG00000189334	cg23851011	-0.588048	1.41371e-09	0.000642299	-0.5069	0	0	overlap
ENSG00000189334	cg25433648	-0.578582	3.81512e-09	0.00173334	-0.503507	0	0	overlap
ENSG00000160712	cg09257526	-0.558431	1.90167e-08	0.00863996	-0.465628	0	0	overlap
ENSG00000160691	cg09025625	-0.653225	0	0	-0.551205	0	0	overlap
ENSG00000160691	cg12473916	-0.679269	0	0	-0.597657	0	0	overlap
ENSG00000160691	cg16254756	-0.704046	0	0	-0.538273	0	0	overlap
ENSG00000160691	cg22018051	-0.539186	7.03606e-08	0.0319673	-0.4263	3.99174e-13	1.81359e-07	overlap
ENSG00000160691	cg25603883	-0.631066	0	0	-0.439481	1.67383e-15	7.60481e-10	overlap
ENSG00000160685	cg17329534	-0.550414	3.33402e-08	0.0151476	-0.400751	1.70663e-11	7.75381e-06	overlap
ENSG00000169242	cg12052789	-0.5623	1.43412e-08	0.00651572	-0.51583	0	0	overlap
ENSG00000169242	cg14612733	-0.586583	1.68479e-09	0.00076546	-0.615714	0	0	overlap
ENSG00000169242	cg16677112	-0.60973	0	0	-0.6212	0	0	overlap
ENSG00000169242	cg19628619	-0.61401	0	0	-0.594371	0	0	overlap
ENSG00000169242	cg00149684	-0.57789	4.06357e-09	0.00184622	-0.50591	0	0	overlap
ENSG00000132692	cg05654780	0.662378	0	0	0.573088	0	0	overlap
ENSG00000132692	cg04843111	0.678429	0	0	0.517141	0	0	overlap
ENSG00000132692	cg07134230	-0.59409	5.70689e-10	0.000259284	-0.587798	0	0	overlap
ENSG00000132692	cg09182138	0.561361	1.53693e-08	0.00698282	0.325644	6.93253e-08	0.0314969	overlap
ENSG00000132692	cg13069892	0.568885	8.67154e-09	0.00393978	0.474587	0	0	overlap
ENSG00000132692	cg15101245	-0.622439	0	0	-0.610614	0	0	overlap
ENSG00000132692	cg20270188	0.540964	6.26699e-08	0.0284731	0.273962	6.54986e-06	1	fSpecific
ENSG00000132692	cg22439792	0.542314	5.73635e-08	0.0260623	0.340513	1.59345e-08	0.00723961	overlap
ENSG00000132692	cg21475402	0.575487	5.02779e-09	0.0022843	0.382304	1.65556e-10	7.52179e-05	overlap
ENSG00000132692	cg23640929	0.648944	0	0	0.612392	0	0	overlap
ENSG00000132692	cg25343618	-0.641602	0	0	-0.648597	0	0	overlap
ENSG00000163568	cg17217296	-0.621682	0	0	-0.753018	0	0	overlap
ENSG00000163568	cg00490406	-0.612166	0	0	-0.762025	0	0	overlap
ENSG00000162738	cg09339089	-0.596773	3.09163e-10	0.000140463	-0.514235	0	0	overlap
ENSG00000162738	cg14710465	-0.555221	2.38915e-08	0.0108547	-0.470929	0	0	overlap
ENSG00000143217	cg26035542	-0.567189	9.90269e-09	0.00449914	-0.176462	0.00400021	1	fSpecific
ENSG00000162733	cg17217691	-0.569395	8.3277e-09	0.00378356	-0.451613	0	0	overlap
ENSG00000185630	cg03652564	-0.59702	2.87919e-10	0.000130812	-0.327495	5.79645e-08	0.0263353	overlap
ENSG00000185630	cg02955020	0.586188	1.76318e-09	0.000801073	0.31608	1.71616e-07	0.0779713	fSpecific
ENSG00000188859	cg17940268	0.680175	0	0	0.401771	1.49498e-11	6.79223e-06	overlap
ENSG00000188859	cg21908886	0.549162	3.63075e-08	0.0164958	0.240507	8.02804e-05	1	fSpecific
ENSG00000188859	cg24428232	0.651463	0	0	0.461523	0	0	overlap
ENSG00000188859	cg24554839	0.654838	0	0	0.412056	3.72147e-12	1.6908e-06	overlap
ENSG00000188859	cg25194322	0.535103	9.14968e-08	0.0415702	0.486406	0	0	overlap
ENSG00000143195	cg24833674	0.540141	6.6127e-08	0.0300438	0.379514	2.2968e-10	0.000104352	overlap
ENSG00000116183	cg18236464	0.549014	3.66746e-08	0.0166625	0.465038	0	0	overlap
ENSG00000152092	cg08104310	0.557921	1.97259e-08	0.00896217	0.408477	6.11809e-12	2.77966e-06	overlap
ENSG00000135838	cg02814691	-0.562152	1.44994e-08	0.00658757	-0.424261	5.71473e-13	2.5964e-07	overlap
ENSG00000135838	cg07813275	-0.595127	4.62652e-10	0.000210199	-0.462701	0	0	overlap
ENSG00000116711	cg23610736	0.581594	2.86489e-09	0.00130162	0.658174	0	0	overlap
ENSG00000116852	cg07344172	0.53861	7.30368e-08	0.0331832	0.366697	9.88093e-10	0.000448925	overlap
ENSG00000174307	cg26120226	-0.561016	1.57643e-08	0.00716227	-0.56983	0	0	overlap
ENSG00000163435	cg04125586	-0.576721	4.51217e-09	0.00205004	-0.56116	0	0	overlap
ENSG00000163435	cg09262245	-0.638951	0	0	-0.496626	0	0	overlap
ENSG00000163435	cg11802442	-0.562777	1.38419e-08	0.00628888	-0.499685	0	0	overlap
ENSG00000163435	cg18218190	-0.594864	4.89223e-10	0.000222271	-0.545057	0	0	overlap
ENSG00000170382	cg04309480	0.592081	8.07657e-10	0.000366947	0.514733	0	0	overlap
ENSG00000170382	cg16488065	0.624892	0	0	0.611655	0	0	overlap
ENSG00000163531	cg04905877	0.578071	3.99732e-09	0.00181612	0.504041	0	0	overlap
ENSG00000163531	cg09060469	0.565872	1.09603e-08	0.00497963	0.454679	0	0	overlap
ENSG00000163531	cg14514130	0.541622	6.00266e-08	0.0272722	0.554173	0	0	overlap
ENSG00000163531	cg17179826	0.566893	1.01326e-08	0.00460359	0.468925	0	0	overlap
ENSG00000163531	cg19158124	0.704507	0	0	0.637709	0	0	overlap
ENSG00000163531	cg24880044	0.559798	1.72293e-08	0.0078279	0.466866	0	0	overlap
ENSG00000163531	cg24683255	0.56388	1.27467e-08	0.00579128	0.518831	0	0	overlap
ENSG00000133069	cg02237875	0.537457	7.8678e-08	0.0357462	0.340004	1.67767e-08	0.00762223	overlap
ENSG00000186007	cg01364826	0.548932	3.688e-08	0.0167559	0.403339	1.21783e-11	5.53303e-06	overlap
ENSG00000182795	cg20738274	-0.626077	0	0	-0.484171	0	0	overlap
ENSG00000196878	cg07168232	-0.649405	0	0	-0.411338	4.11713e-12	1.87056e-06	overlap
ENSG00000117595	cg05034446	-0.546364	4.38492e-08	0.0199222	-0.391228	5.658e-11	2.57063e-05	overlap
ENSG00000117595	cg22046121	-0.546611	4.31295e-08	0.0195953	-0.379786	2.22515e-10	0.000101097	overlap
ENSG00000143469	cg12052613	0.539844	6.74147e-08	0.0306288	0.407364	7.11846e-12	3.23416e-06	overlap
ENSG00000143469	cg18759788	0.607326	0	0	0.590999	0	0	overlap
ENSG00000117707	cg06177568	0.612528	0	0	0.422032	8.28796e-13	3.76551e-07	overlap
ENSG00000117707	cg16382030	0.541277	6.14011e-08	0.0278967	0.498457	0	0	overlap
ENSG00000117707	cg00417025	0.620595	0	0	0.525031	0	0	overlap
ENSG00000117707	cg01902845	0.601762	0	0	0.465154	0	0	overlap
ENSG00000117707	cg22800590	0.551352	3.12631e-08	0.0142039	0.509707	0	0	overlap
ENSG00000117707	cg22376805	0.685443	0	0	0.554847	0	0	overlap
ENSG00000117707	cg26926612	0.556916	2.11915e-08	0.00962805	0.344775	1.03079e-08	0.00468323	overlap
ENSG00000117707	cg25379954	0.590517	1.02034e-09	0.000463576	0.570815	0	0	overlap
ENSG00000117707	cg26054764	0.633321	0	0	0.470829	0	0	overlap
ENSG00000196482	cg08454344	0.564308	1.23427e-08	0.00560772	0.520944	0	0	overlap
ENSG00000143819	cg25152404	-0.712047	0	0	-0.653139	0	0	overlap
ENSG00000203685	cg11211263	0.542314	5.73635e-08	0.0260623	0.134468	0.0286942	1	fSpecific
ENSG00000162931	cg04945350	-0.57682	4.47282e-09	0.00203216	-0.481546	0	0	overlap
ENSG00000162931	cg20939768	-0.556818	2.13409e-08	0.0096959	-0.500353	0	0	overlap
ENSG00000181218	cg03449175	-0.61643	0	0	-0.395743	3.23013e-11	1.46756e-05	overlap
ENSG00000181218	cg06034933	-0.565477	1.12961e-08	0.0051322	-0.461287	0	0	overlap
ENSG00000181218	cg08639523	-0.593777	6.05113e-10	0.000274924	-0.402612	1.33963e-11	6.0864e-06	overlap
ENSG00000181218	cg06757385	-0.653406	0	0	-0.485127	0	0	overlap
ENSG00000181218	cg11343017	-0.558497	1.89269e-08	0.00859915	-0.384501	1.27606e-10	5.79759e-05	overlap
ENSG00000181218	cg11672054	-0.581018	3.03109e-09	0.00137713	-0.427843	2.996e-13	1.36119e-07	overlap
ENSG00000181218	cg15471815	-0.550035	3.42137e-08	0.0155445	-0.452216	0	0	overlap
ENSG00000181218	cg17515024	-0.704721	0	0	-0.580377	0	0	overlap
ENSG00000181218	cg00146645	-0.596115	3.6803e-10	0.000167209	-0.518831	0	0	overlap
ENSG00000181218	cg00112780	-0.544734	4.88853e-08	0.0222103	-0.374783	3.96852e-10	0.000180304	overlap
ENSG00000181218	cg00948275	-0.605746	0	0	-0.394296	3.87134e-11	1.75889e-05	overlap
ENSG00000181218	cg21453831	-0.638474	0	0	-0.47203	0	0	overlap
ENSG00000181218	cg21401647	-0.593662	6.18019e-10	0.000280787	-0.416016	2.1009e-12	9.54512e-07	overlap
ENSG00000181218	cg25272655	-0.692538	0	0	-0.520134	0	0	overlap
ENSG00000196890	cg03449175	-0.569412	8.3168e-09	0.00377861	-0.321389	1.04145e-07	0.0473169	overlap
ENSG00000196890	cg08639523	-0.565988	1.0864e-08	0.00493588	-0.355965	3.18478e-09	0.00144695	overlap
ENSG00000196890	cg06757385	-0.62611	0	0	-0.416366	1.99471e-12	9.06268e-07	overlap
ENSG00000196890	cg11343017	-0.563041	1.35731e-08	0.00616674	-0.329645	4.70185e-08	0.0213621	overlap
ENSG00000196890	cg11672054	-0.539285	6.99112e-08	0.0317631	-0.3512	5.28093e-09	0.00239931	overlap
ENSG00000196890	cg17515024	-0.658608	0	0	-0.501254	0	0	overlap
ENSG00000196890	cg00948275	-0.603177	0	0	-0.296341	1.01416e-06	0.460766	fSpecific
ENSG00000196890	cg21453831	-0.566547	1.04066e-08	0.0047281	-0.386881	9.59689e-11	4.36021e-05	overlap
ENSG00000196890	cg21401647	-0.557871	1.97958e-08	0.00899392	-0.344838	1.0241e-08	0.00465285	overlap
ENSG00000196890	cg25272655	-0.652352	0	0	-0.460395	0	0	overlap
ENSG00000177614	cg03469233	0.601794	0	0	0.625572	0	0	overlap
ENSG00000177614	cg03424127	0.573198	6.10887e-09	0.00277547	0.416005	2.10431e-12	9.5606e-07	overlap
ENSG00000177614	cg06313507	0.534659	9.41274e-08	0.0427654	0.598748	0	0	overlap
ENSG00000177614	cg10877049	0.656715	0	0	0.581524	0	0	overlap
ENSG00000177614	cg11176853	0.629732	0	0	0.596713	0	0	overlap
ENSG00000177614	cg17494334	0.541194	6.17326e-08	0.0280473	0.633499	0	0	overlap
ENSG00000177614	cg19560210	0.55983	1.71882e-08	0.0078092	0.543019	0	0	overlap
ENSG00000177614	cg20699340	0.651644	0	0	0.585557	0	0	overlap
ENSG00000177614	cg27224809	0.589892	1.113e-09	0.000505675	0.52213	0	0	overlap
ENSG00000212916	cg05460318	-0.636235	0	0	-0.574971	0	0	overlap
ENSG00000212916	cg06935979	-0.629567	0	0	-0.600409	0	0	overlap
ENSG00000212916	cg16430166	-0.618867	0	0	-0.519574	0	0	overlap
ENSG00000212916	cg00951395	-0.632086	0	0	-0.552669	0	0	overlap
ENSG00000183780	cg07185425	0.562744	1.38759e-08	0.0063043	0.458403	0	0	overlap
ENSG00000183780	cg09119043	0.549179	3.62669e-08	0.0164773	0.502918	0	0	overlap
ENSG00000183780	cg00161124	0.597646	2.36062e-10	0.000107251	0.508749	0	0	overlap
ENSG00000183780	cg23093692	0.60731	0	0	0.497407	0	0	overlap
ENSG00000186197	cg04311403	-0.563288	1.33253e-08	0.00605414	-0.577188	0	0	overlap
ENSG00000180287	cg12636785	0.666428	0	0	0.468505	0	0	overlap
ENSG00000180287	cg17150265	0.634934	0	0	0.468411	0	0	overlap
ENSG00000197472	cg02236896	0.567255	9.85222e-09	0.00447621	0.474317	0	0	overlap
ENSG00000162722	cg20429172	-0.564687	1.19947e-08	0.00544963	-0.478513	0	0	overlap
ENSG00000184731	cg07058971	-0.552455	2.89739e-08	0.0131638	-0.588347	0	0	overlap
ENSG00000172554	cg05472059	0.659563	0	0	0.487991	0	0	overlap
ENSG00000172554	cg06288198	0.551105	3.17979e-08	0.0144469	0.42183	8.56515e-13	3.89145e-07	overlap
ENSG00000172554	cg10325383	0.589661	1.14829e-09	0.000521708	0.489921	0	0	overlap
ENSG00000172554	cg12253753	0.547829	3.97369e-08	0.0180539	0.337076	2.25341e-08	0.010238	overlap
ENSG00000172554	cg12738913	0.542314	5.73635e-08	0.0260623	0.479623	0	0	overlap
ENSG00000172554	cg20971474	0.563617	1.30011e-08	0.00590684	0.488425	0	0	overlap
ENSG00000172554	cg18330370	0.646886	0	0	0.483253	0	0	overlap
ENSG00000130508	cg03591285	0.556242	2.22312e-08	0.0101004	0.56425	0	0	overlap
ENSG00000130508	cg03267487	0.659645	0	0	0.584658	0	0	overlap
ENSG00000130508	cg07772617	0.60805	0	0	0.494225	0	0	overlap
ENSG00000130508	cg14671764	0.60186	0	0	0.559891	0	0	overlap
ENSG00000130508	cg20417128	0.595473	4.28646e-10	0.000194749	0.540493	0	0	overlap
ENSG00000130508	cg23397325	0.583307	2.41018e-09	0.00109503	0.558382	0	0	overlap
ENSG00000130508	cg23858189	0.544125	5.09018e-08	0.0231264	0.487247	0	0	overlap
ENSG00000130508	cg26381919	0.569791	8.06953e-09	0.00366627	0.573542	0	0	overlap
ENSG00000130508	cg27160524	0.61801	0	0	0.614152	0	0	overlap
ENSG00000118004	cg23859888	0.558448	1.89942e-08	0.00862974	0.494909	0	0	overlap
ENSG00000115758	cg15075241	-0.608347	0	0	-0.548721	0	0	overlap
ENSG00000115758	cg26236235	-0.594452	5.31912e-10	0.000241666	-0.480905	0	0	overlap
ENSG00000196208	cg07596106	0.541013	6.24679e-08	0.0283814	0.538608	0	0	overlap
ENSG00000071575	cg15241074	-0.569247	8.4263e-09	0.00382836	-0.49185	0	0	overlap
ENSG00000163032	cg20176388	-0.656073	0	0	-0.497745	0	0	overlap
ENSG00000151379	cg11046593	-0.570334	7.72565e-09	0.00351003	-0.565039	0	0	overlap
ENSG00000170745	cg04470085	0.625633	0	0	0.532199	0	0	overlap
ENSG00000170745	cg08187110	0.536157	8.55346e-08	0.0388614	0.510219	0	0	overlap
ENSG00000170745	cg05194509	0.537161	8.01933e-08	0.0364346	0.364053	1.32388e-09	0.000601484	overlap
ENSG00000170745	cg05417035	0.546018	4.48753e-08	0.0203884	0.467174	0	0	overlap
ENSG00000170745	cg00995141	0.583817	2.28529e-09	0.00103829	0.401934	1.46369e-11	6.65004e-06	overlap
ENSG00000170745	cg26119806	-0.580343	3.23476e-09	0.00146967	-0.452445	0	0	overlap
ENSG00000170745	cg25420747	0.563271	1.33417e-08	0.00606159	0.580795	0	0	overlap
ENSG00000119771	cg05930000	0.699189	0	0	0.687036	0	0	overlap
ENSG00000119771	cg06116704	0.595127	4.62652e-10	0.000210199	0.443734	0	0	overlap
ENSG00000119771	cg08569786	0.679154	0	0	0.507074	0	0	overlap
ENSG00000119771	cg16704797	0.53991	6.71265e-08	0.0304979	0.467688	0	0	overlap
ENSG00000119771	cg19788941	0.548273	3.85619e-08	0.01752	0.458722	0	0	overlap
ENSG00000119771	cg22545361	0.631345	0	0	0.432677	1.05833e-13	4.80835e-08	overlap
ENSG00000173557	cg15398497	0.535399	8.97816e-08	0.0407909	0.475641	0	0	overlap
ENSG00000173557	cg27305303	0.568243	9.12127e-09	0.00414411	0.311944	2.51621e-07	0.11432	fSpecific
ENSG00000179270	cg13597316	-0.610322	0	0	-0.552589	0	0	overlap
ENSG00000179270	cg23429306	-0.574318	5.55857e-09	0.00252545	-0.619013	0	0	overlap
ENSG00000158089	cg03442269	0.635675	0	0	0.465715	0	0	overlap
ENSG00000158089	cg10035812	0.54587	4.53219e-08	0.0205913	0.599147	0	0	overlap
ENSG00000158089	cg10582371	0.692406	0	0	0.419651	1.21069e-12	5.50059e-07	overlap
ENSG00000158089	cg20304857	0.593448	6.42308e-10	0.000291823	0.604695	0	0	overlap
ENSG00000158089	cg18098004	0.723834	0	0	0.558664	0	0	overlap
ENSG00000163171	cg07992500	-0.582269	2.67883e-09	0.00121709	-0.519835	0	0	overlap
ENSG00000162878	cg13773247	-0.556225	2.22571e-08	0.0101122	-0.494431	0	0	overlap
ENSG00000162882	cg09256201	-0.575503	5.02062e-09	0.00228104	-0.607873	0	0	overlap
ENSG00000223658	cg17110364	-0.694777	0	0	-0.62967	0	0	overlap
ENSG00000138083	cg07616374	0.53912	7.06618e-08	0.0321041	0.442211	0	0	overlap
ENSG00000138083	cg13975344	0.543186	5.41602e-08	0.0246069	0.410241	4.79856e-12	2.18015e-06	overlap
ENSG00000138083	cg24981593	0.564868	1.18314e-08	0.00537541	0.426307	3.98662e-13	1.81126e-07	overlap
ENSG00000170577	cg03646261	-0.782031	0	0	-0.653935	0	0	overlap
ENSG00000170577	cg06819718	-0.753319	0	0	-0.611098	0	0	overlap
ENSG00000170577	cg05847586	-0.710598	0	0	-0.61696	0	0	overlap
ENSG00000170577	cg05136263	-0.716459	0	0	-0.667885	0	0	overlap
ENSG00000179915	cg09044294	0.568161	9.18035e-09	0.00417095	0.511298	0	0	overlap
ENSG00000115380	cg20786074	-0.764975	0	0	-0.657662	0	0	overlap
ENSG00000115380	cg23260993	-0.724756	0	0	-0.640374	0	0	overlap
ENSG00000115380	cg25711779	-0.787431	0	0	-0.694154	0	0	overlap
ENSG00000237651	cg05037927	-0.684587	0	0	-0.583837	0	0	overlap
ENSG00000237651	cg10580144	-0.626061	0	0	-0.552496	0	0	overlap
ENSG00000237651	cg16328106	-0.690003	0	0	-0.554003	0	0	overlap
ENSG00000237651	cg19790321	-0.704968	0	0	-0.582455	0	0	overlap
ENSG00000237651	cg18158151	-0.624102	0	0	-0.536786	0	0	overlap
ENSG00000237651	cg01648237	-0.694629	0	0	-0.669019	0	0	overlap
ENSG00000237651	cg23405039	-0.626011	0	0	-0.558465	0	0	overlap
ENSG00000237651	cg26147678	-0.65064	0	0	-0.622656	0	0	overlap
ENSG00000237651	cg24757310	-0.684866	0	0	-0.569127	0	0	overlap
ENSG00000115504	cg23861541	-0.542841	5.5409e-08	0.0251742	-0.430931	1.59296e-13	7.23738e-08	overlap
ENSG00000115507	cg00431699	-0.538396	7.40549e-08	0.0336457	-0.491356	0	0	overlap
ENSG00000179833	cg12734023	-0.637568	0	0	-0.459345	0	0	overlap
ENSG00000179833	cg15742737	-0.632086	0	0	-0.44778	0	0	overlap
ENSG00000115902	cg02085294	-0.549179	3.62669e-08	0.0164773	-0.510397	0	0	overlap
ENSG00000116035	cg05021771	-0.605367	0	0	-0.660412	0	0	overlap
ENSG00000144031	cg15165122	-0.593267	6.63191e-10	0.000301311	-0.418736	1.39491e-12	6.33758e-07	overlap
ENSG00000144045	cg06151718	-0.594106	5.68902e-10	0.000258472	-0.455371	0	0	overlap
ENSG00000144045	cg01410453	-0.591505	8.82975e-10	0.000401167	-0.453364	0	0	overlap
ENSG00000144045	cg02034222	-0.655546	0	0	-0.582054	0	0	overlap
ENSG00000144045	cg00588297	-0.63258	0	0	-0.451548	0	0	overlap
ENSG00000144045	cg24544105	-0.576162	4.7404e-09	0.00215373	-0.402834	1.30128e-11	5.91216e-06	overlap
ENSG00000176204	cg09905511	0.567091	9.97882e-09	0.00453373	0.515704	0	0	overlap
ENSG00000115386	cg11761200	0.554003	2.60203e-08	0.0118219	0.480489	0	0	overlap
ENSG00000152284	cg03255379	0.580722	3.11929e-09	0.0014172	0.402436	1.37094e-11	6.22867e-06	overlap
ENSG00000152284	cg07030727	0.596806	3.06304e-10	0.000139165	0.565823	0	0	overlap
ENSG00000144115	cg04511125	-0.544471	4.9748e-08	0.0226022	-0.602422	0	0	overlap
ENSG00000214336	cg09437783	0.613351	0	0	0.536668	0	0	overlap
ENSG00000155066	cg14052728	-0.546973	4.20939e-08	0.0191247	-0.626331	0	0	overlap
ENSG00000155066	cg15994182	-0.54373	5.22508e-08	0.0237394	-0.626271	0	0	overlap
ENSG00000155066	cg00029282	-0.573807	5.80417e-09	0.00263704	-0.652968	0	0	overlap
ENSG00000115041	cg04001714	0.580903	3.06516e-09	0.00139261	0.620417	0	0	overlap
ENSG00000115041	cg16178141	0.618521	0	0	0.549572	0	0	overlap
ENSG00000115041	cg25928742	0.593349	6.53661e-10	0.000296981	0.503995	0	0	overlap
ENSG00000198885	cg06909469	-0.549755	3.48729e-08	0.015844	-0.675016	0	0	overlap
ENSG00000198885	cg08983217	-0.592904	7.05885e-10	0.000320708	-0.614986	0	0	overlap
ENSG00000198885	cg13997864	-0.559057	1.81787e-08	0.00825923	-0.609493	0	0	overlap
ENSG00000198885	cg17932631	-0.660501	0	0	-0.694715	0	0	overlap
ENSG00000198885	cg18720905	-0.673491	0	0	-0.6604	0	0	overlap
ENSG00000198885	cg24161793	-0.562925	1.36902e-08	0.00621992	-0.692726	0	0	overlap
ENSG00000115085	cg21773162	-0.536437	8.40134e-08	0.0381702	-0.372324	5.25285e-10	0.000238655	overlap
ENSG00000115526	cg18845236	0.615706	0	0	0.654658	0	0	overlap
ENSG00000115594	cg27598107	-0.550298	3.36039e-08	0.0152674	-0.488405	0	0	overlap
ENSG00000115641	cg10666081	0.543697	5.23647e-08	0.0237911	0.329035	4.99031e-08	0.0226727	overlap
ENSG00000115641	cg00004700	-0.535185	9.10173e-08	0.0413523	-0.551859	0	0	overlap
ENSG00000071051	cg18709306	-0.592015	8.16091e-10	0.000370779	-0.177132	0.00386202	1	fSpecific
ENSG00000144057	cg13168617	0.562119	1.45347e-08	0.00660364	0.608284	0	0	overlap
ENSG00000144057	cg12800781	0.551698	3.05283e-08	0.0138701	0.519969	0	0	overlap
ENSG00000144057	cg18958907	0.550068	3.41369e-08	0.0155096	0.558548	0	0	overlap
ENSG00000186522	cg02506716	-0.534461	9.53193e-08	0.0433069	-0.534164	0	0	overlap
ENSG00000125618	cg02675527	0.559913	1.70857e-08	0.00776265	0.638931	0	0	overlap
ENSG00000125618	cg07594247	-0.641569	0	0	-0.720734	0	0	overlap
ENSG00000125618	cg07772999	-0.710516	0	0	-0.778783	0	0	overlap
ENSG00000125618	cg09704166	0.691073	0	0	0.536335	0	0	overlap
ENSG00000125618	cg11763394	-0.837461	0	0	-0.830263	0	0	overlap
ENSG00000125618	cg12889195	-0.843223	0	0	-0.847787	0	0	overlap
ENSG00000125618	cg17445212	-0.606437	0	0	-0.698605	0	0	overlap
ENSG00000125618	cg19083407	-0.783463	0	0	-0.847248	0	0	overlap
ENSG00000125618	cg21610815	-0.812619	0	0	-0.817766	0	0	overlap
ENSG00000125618	cg21550016	-0.812388	0	0	-0.826022	0	0	overlap
ENSG00000125618	cg21482265	-0.812323	0	0	-0.82201	0	0	overlap
ENSG00000175497	cg06119201	0.646508	0	0	0.458835	0	0	overlap
ENSG00000175497	cg18580232	0.532222	1.09858e-07	0.0499125	0.446366	0	0	overlap
ENSG00000175497	cg19508823	0.546989	4.20474e-08	0.0191036	0.434347	6.74737e-14	3.06557e-08	overlap
ENSG00000163064	cg05036212	0.558266	1.92429e-08	0.00874274	0.498069	0	0	overlap
ENSG00000163064	cg02958634	0.610273	0	0	0.6371	0	0	overlap
ENSG00000163064	cg08138685	0.608248	0	0	0.614441	0	0	overlap
ENSG00000163064	cg09385093	0.586369	1.72696e-09	0.000784619	0.497281	0	0	overlap
ENSG00000163064	cg13367169	0.709643	0	0	0.672104	0	0	overlap
ENSG00000163064	cg12418535	0.600148	5.4643e-11	2.48262e-05	0.566084	0	0	overlap
ENSG00000163064	cg16911810	0.573873	5.77199e-09	0.00262242	0.65304	0	0	overlap
ENSG00000163064	cg02327563	0.619163	0	0	0.596935	0	0	overlap
ENSG00000163064	cg21301942	0.680158	0	0	0.596048	0	0	overlap
ENSG00000144118	cg11305121	-0.602552	0	0	-0.636683	0	0	overlap
ENSG00000155052	cg05049825	0.536288	8.48155e-08	0.0385347	0.384962	1.20781e-10	5.48753e-05	overlap
ENSG00000155052	cg02803828	0.622093	0	0	0.404148	1.09467e-11	4.97345e-06	overlap
ENSG00000155052	cg03321349	0.534576	9.46223e-08	0.0429902	0.35641	3.03659e-09	0.00137963	overlap
ENSG00000155052	cg17654747	0.533753	9.97078e-08	0.0453008	0.258754	2.13234e-05	1	fSpecific
ENSG00000155052	cg19074170	0.551484	3.09813e-08	0.0140759	0.276255	5.44885e-06	1	fSpecific
ENSG00000136717	cg22768700	0.535268	9.05401e-08	0.0411355	0.434595	6.26459e-14	2.84622e-08	overlap
ENSG00000176771	cg03671556	0.593859	5.95969e-10	0.00027077	0.529868	0	0	overlap
ENSG00000176771	cg23072408	0.576474	4.61176e-09	0.00209528	0.555972	0	0	overlap
ENSG00000144229	cg07412043	0.54401	5.12918e-08	0.0233037	0.465263	0	0	overlap
ENSG00000144229	cg06848148	0.537227	7.98542e-08	0.0362806	0.490732	0	0	overlap
ENSG00000144229	cg08231096	0.594847	4.90903e-10	0.000223034	0.541402	0	0	overlap
ENSG00000144229	cg23154270	0.578121	3.9794e-09	0.00180798	0.57815	0	0	overlap
ENSG00000144278	cg26852477	0.578483	3.84987e-09	0.00174913	0.39004	6.54412e-11	2.97322e-05	overlap
ENSG00000054219	cg10107725	-0.621336	0	0	-0.544031	0	0	overlap
ENSG00000054219	cg15026998	-0.59162	8.67635e-10	0.000394197	-0.520547	0	0	overlap
ENSG00000054219	cg01092293	-0.568441	8.98081e-09	0.0040803	-0.429141	2.32267e-13	1.05527e-07	overlap
ENSG00000182263	cg02561014	0.560522	1.63443e-08	0.00742577	0.531071	0	0	overlap
ENSG00000182263	cg03603122	0.680504	0	0	0.580469	0	0	overlap
ENSG00000182263	cg17789713	0.669605	0	0	0.677722	0	0	overlap
ENSG00000182263	cg22682693	0.646557	0	0	0.538878	0	0	overlap
ENSG00000169507	cg05090759	-0.639988	0	0	-0.435091	5.36499e-14	2.4375e-08	overlap
ENSG00000169507	cg03464655	-0.599901	7.08164e-11	3.21744e-05	-0.403828	1.1419e-11	5.18805e-06	overlap
ENSG00000169507	cg05339727	-0.593168	6.74711e-10	0.000306545	-0.429619	2.10718e-13	9.57365e-08	overlap
ENSG00000136531	cg00508771	0.554085	2.58712e-08	0.0117542	0.550987	0	0	overlap
ENSG00000128683	cg04105250	0.597712	2.30763e-10	0.000104844	0.643793	0	0	overlap
ENSG00000128683	cg14486905	0.592098	8.05555e-10	0.000365992	0.629811	0	0	overlap
ENSG00000144355	cg12676702	0.577363	4.26119e-09	0.00193601	0.603996	0	0	overlap
ENSG00000144355	cg01244270	0.532765	1.0615e-07	0.0482277	0.640828	0	0	overlap
ENSG00000128713	cg10364040	0.546644	4.30344e-08	0.019552	0.457866	0	0	overlap
ENSG00000128713	cg13217260	0.538906	7.16488e-08	0.0325526	0.372692	5.03739e-10	0.000228866	overlap
ENSG00000128713	cg12504882	0.544487	4.96937e-08	0.0225776	0.391237	5.65218e-11	2.56798e-05	overlap
ENSG00000128713	cg16334629	0.554941	2.4366e-08	0.0110703	0.440963	0	0	overlap
ENSG00000128713	cg15767955	0.545327	4.69949e-08	0.0213514	0.507948	0	0	overlap
ENSG00000128713	cg19738283	0.674775	0	0	0.547922	0	0	overlap
ENSG00000128713	cg20649017	0.557131	2.08712e-08	0.0094825	0.47915	0	0	overlap
ENSG00000128713	cg00095728	0.5852	1.9696e-09	0.000894859	0.453215	0	0	overlap
ENSG00000128713	cg21591742	0.54368	5.24218e-08	0.0238171	0.41201	3.74562e-12	1.70176e-06	overlap
ENSG00000128713	cg25626427	0.55234	2.92056e-08	0.0132691	0.484942	0	0	overlap
ENSG00000128710	cg09968620	0.544256	5.04593e-08	0.0229254	0.301738	6.31694e-07	0.287001	fSpecific
ENSG00000128710	cg10753836	0.548701	3.74608e-08	0.0170197	0.546287	0	0	overlap
ENSG00000128710	cg13158481	0.684784	0	0	0.54515	0	0	overlap
ENSG00000128710	cg11597131	0.55825	1.92657e-08	0.00875308	0.377182	3.01132e-10	0.000136815	overlap
ENSG00000128710	cg14991487	0.557262	2.06762e-08	0.00939393	0.28983	1.77319e-06	0.805622	fSpecific
ENSG00000128710	cg19738283	0.634144	0	0	0.538178	0	0	overlap
ENSG00000128710	cg20649017	0.552784	2.83209e-08	0.0128672	0.471585	0	0	overlap
ENSG00000128710	cg00095728	0.533671	1.0023e-07	0.0455381	0.507209	0	0	overlap
ENSG00000128710	cg22541735	0.614125	0	0	0.349436	6.35448e-09	0.00288706	overlap
ENSG00000128710	cg25829490	0.59325	6.65105e-10	0.00030218	0.585777	0	0	overlap
ENSG00000128709	cg10753836	0.53316	1.03527e-07	0.0470362	0.50312	0	0	overlap
ENSG00000175879	cg17863912	-0.532551	1.07597e-07	0.0488849	-0.505953	0	0	overlap
ENSG00000128652	cg13180315	0.538692	7.26488e-08	0.0330069	0.557111	0	0	overlap
ENSG00000128652	cg18702197	0.533506	1.01283e-07	0.0460164	0.590349	0	0	overlap
ENSG00000128652	cg24704177	0.557394	2.04829e-08	0.00930611	0.584955	0	0	overlap
ENSG00000155657	cg04220104	-0.567683	9.52951e-09	0.00432959	-0.375624	3.60359e-10	0.000163724	overlap
ENSG00000155657	cg10939966	0.578944	3.68977e-09	0.00167639	0.439366	2.54018e-15	1.15409e-09	overlap
ENSG00000155657	cg17740434	-0.714878	0	0	-0.539518	0	0	overlap
ENSG00000155657	cg19916659	-0.658476	0	0	-0.467454	0	0	overlap
ENSG00000144366	cg07791987	0.551747	3.04247e-08	0.013823	0.59655	0	0	overlap
ENSG00000151689	cg20016569	-0.589612	1.15593e-09	0.000525182	-0.321128	1.06759e-07	0.0485043	overlap
ENSG00000115415	cg00676801	-0.564193	1.24504e-08	0.00565663	-0.601949	0	0	overlap
ENSG00000168497	cg04004830	-0.576277	4.69268e-09	0.00213205	-0.556348	0	0	overlap
ENSG00000168497	cg18843739	-0.565905	1.09327e-08	0.0049671	-0.495051	0	0	overlap
ENSG00000196141	cg08866865	-0.542907	5.51691e-08	0.0250652	-0.489748	0	0	overlap
ENSG00000155754	cg04983151	-0.799251	0	0	-0.761232	0	0	overlap
ENSG00000155754	cg04411541	-0.58683	1.63697e-09	0.000743734	-0.60938	0	0	overlap
ENSG00000155754	cg03020006	-0.781224	0	0	-0.742564	0	0	overlap
ENSG00000155754	cg11052143	-0.613302	0	0	-0.589784	0	0	overlap
ENSG00000155754	cg15780361	-0.554645	2.48777e-08	0.0113028	-0.635271	0	0	overlap
ENSG00000155754	cg22981993	-0.543499	5.30531e-08	0.0241039	-0.555631	0	0	overlap
ENSG00000155760	cg03345454	-0.547829	3.97369e-08	0.0180539	-0.527234	0	0	overlap
ENSG00000118257	cg01154445	-0.674841	0	0	-0.590245	0	0	overlap
ENSG00000144407	cg08623091	-0.659497	0	0	-0.709631	0	0	overlap
ENSG00000144407	cg14566801	-0.570663	7.52333e-09	0.00341811	-0.691872	0	0	overlap
ENSG00000144407	cg18559579	-0.666757	0	0	-0.761283	0	0	overlap
ENSG00000144407	cg02296171	-0.653208	0	0	-0.766414	0	0	overlap
ENSG00000144407	cg00281776	-0.694152	0	0	-0.752314	0	0	overlap
ENSG00000144407	cg26301283	-0.623624	0	0	-0.731213	0	0	overlap
ENSG00000144407	cg25223552	-0.581018	3.03109e-09	0.00137713	-0.4982	0	0	overlap
ENSG00000115457	cg11669516	-0.623624	0	0	-0.410947	4.34868e-12	1.97576e-06	overlap
ENSG00000115457	cg20366479	-0.564638	1.20396e-08	0.00547002	-0.339273	1.80645e-08	0.00820733	overlap
ENSG00000115457	cg23059946	-0.646458	0	0	-0.503435	0	0	overlap
ENSG00000127831	cg18970338	-0.532881	1.05379e-07	0.0478772	-0.52006	0	0	overlap
ENSG00000171450	cg06993099	0.566004	1.08503e-08	0.00492966	0.479998	0	0	overlap
ENSG00000135903	cg02710571	0.561757	1.49287e-08	0.00678264	0.415207	2.36615e-12	1.07503e-06	overlap
ENSG00000135903	cg14064356	0.589991	1.09807e-09	0.00049889	0.520441	0	0	overlap
ENSG00000163082	cg14280181	-0.558546	1.88598e-08	0.00856866	-0.564846	0	0	overlap
ENSG00000163082	cg16171484	-0.733975	0	0	-0.623246	0	0	overlap
ENSG00000169047	cg04751089	-0.588196	1.38794e-09	0.000630591	-0.585274	0	0	overlap
ENSG00000169047	cg17848496	-0.534181	9.70321e-08	0.0440851	-0.593825	0	0	overlap
ENSG00000167165	cg04449108	-0.697806	0	0	-0.556876	0	0	overlap
ENSG00000167165	cg23510527	-0.62639	0	0	-0.636096	0	0	overlap
ENSG00000167165	cg23874600	-0.608841	0	0	-0.603756	0	0	overlap
ENSG00000188042	cg24441922	-0.541952	5.87444e-08	0.0266896	-0.626064	0	0	overlap
ENSG00000168505	cg06546806	0.553953	2.61102e-08	0.0118628	0.477939	0	0	overlap
ENSG00000168505	cg17530231	0.558217	1.93113e-08	0.00877379	0.462997	0	0	overlap
ENSG00000132321	cg05363903	-0.565691	1.11131e-08	0.00504906	-0.659388	0	0	overlap
ENSG00000132321	cg14035807	0.597201	2.72622e-10	0.000123862	0.624905	0	0	overlap
ENSG00000132321	cg20698137	0.63044	0	0	0.434047	7.35763e-14	3.34283e-08	overlap
ENSG00000144476	cg09462350	-0.572145	6.66704e-09	0.00302907	-0.494895	0	0	overlap
ENSG00000144476	cg22908000	-0.607787	0	0	-0.501697	0	0	overlap
ENSG00000130294	cg03342543	0.622571	0	0	0.519772	0	0	overlap
ENSG00000130294	cg07782479	0.614915	0	0	0.335751	2.57279e-08	0.0116891	overlap
ENSG00000130294	cg08614562	0.577791	4.10006e-09	0.0018628	0.521266	0	0	overlap
ENSG00000130294	cg14166212	0.572639	6.40036e-09	0.00290791	0.443171	0	0	overlap
ENSG00000130294	cg12923745	0.532881	1.05379e-07	0.0478772	0.383236	1.48286e-10	6.73716e-05	overlap
ENSG00000130294	cg12511356	0.545936	4.51229e-08	0.0205009	0.412184	3.6549e-12	1.66055e-06	overlap
ENSG00000130294	cg18388084	0.630127	0	0	0.535382	0	0	overlap
ENSG00000130294	cg00495136	0.615459	0	0	0.544691	0	0	overlap
ENSG00000175928	cg20438207	0.571289	7.1512e-09	0.00324904	0.639363	0	0	overlap
ENSG00000175928	cg04150219	0.535976	8.65326e-08	0.0393148	0.602182	0	0	overlap
ENSG00000132164	cg12461092	0.61857	0	0	0.644658	0	0	overlap
ENSG00000144560	cg21617903	-0.546166	4.44328e-08	0.0201874	-0.424505	5.47986e-13	2.48969e-07	overlap
ENSG00000077092	cg27486427	-0.560637	1.62073e-08	0.00736352	-0.631496	0	0	overlap
ENSG00000077092	cg19003815	-0.548537	3.78808e-08	0.0172106	-0.621051	0	0	overlap
ENSG00000077092	cg23518541	-0.602848	0	0	-0.696481	0	0	overlap
ENSG00000077092	cg03428864	-0.542676	5.6013e-08	0.0254487	-0.644302	0	0	overlap
ENSG00000153551	cg16277214	-0.596279	3.53006e-10	0.000160383	-0.526451	0	0	overlap
ENSG00000144677	cg12919119	-0.563963	1.26681e-08	0.00575557	-0.283956	2.90234e-06	1	fSpecific
ENSG00000187091	cg12705340	-0.536338	8.45473e-08	0.0384128	-0.493966	0	0	overlap
ENSG00000182983	cg12019893	0.534478	9.52194e-08	0.0432615	0.508889	0	0	overlap
ENSG00000144649	cg17150789	0.533852	9.90843e-08	0.0450174	0.43818	1.27568e-14	5.79585e-09	overlap
ENSG00000144647	cg00008665	-0.577084	4.3692e-09	0.00198508	-0.535743	0	0	overlap
ENSG00000144647	cg07145744	-0.568622	8.85369e-09	0.00402254	-0.506693	0	0	overlap
ENSG00000196653	cg11003573	-0.797308	0	0	-0.731159	0	0	overlap
ENSG00000196653	cg10263370	-0.765535	0	0	-0.680855	0	0	overlap
ENSG00000196653	cg14768256	-0.584196	2.19562e-09	0.000997546	-0.567975	0	0	overlap
ENSG00000196653	cg15604051	-0.723373	0	0	-0.639912	0	0	overlap
ENSG00000196653	cg15687855	-0.801967	0	0	-0.729742	0	0	overlap
ENSG00000196653	cg12386808	0.754571	0	0	0.721418	0	0	overlap
ENSG00000196653	cg19539664	0.727456	0	0	0.697581	0	0	overlap
ENSG00000196653	cg18722847	-0.797226	0	0	-0.712632	0	0	overlap
ENSG00000196653	cg25151919	-0.709232	0	0	-0.66599	0	0	overlap
ENSG00000196653	cg21672276	-0.79339	0	0	-0.754331	0	0	overlap
ENSG00000182179	cg19381811	-0.550381	3.34153e-08	0.0151818	-0.46305	0	0	overlap
ENSG00000164078	cg27360567	-0.619344	0	0	-0.541837	0	0	overlap
ENSG00000164078	cg11001085	-0.558464	1.89718e-08	0.00861953	-0.537949	0	0	overlap
ENSG00000164078	cg11839681	-0.590731	9.89667e-10	0.00044964	-0.559705	0	0	overlap
ENSG00000164078	cg08687163	-0.683796	0	0	-0.619383	0	0	overlap
ENSG00000164078	cg18706476	-0.567683	9.52951e-09	0.00432959	-0.566897	0	0	overlap
ENSG00000164078	cg18292904	-0.5906	1.00848e-09	0.000458189	-0.517969	0	0	overlap
ENSG00000164078	cg23437479	-0.575585	4.98488e-09	0.00226481	-0.540373	0	0	overlap
ENSG00000001617	cg13333267	-0.616298	0	0	-0.468438	0	0	overlap
ENSG00000114378	cg14943722	-0.597959	2.11159e-10	9.59368e-05	-0.519983	0	0	overlap
ENSG00000114378	cg06360465	-0.554464	2.51953e-08	0.0114471	-0.540549	0	0	overlap
ENSG00000163378	cg01881444	-0.59707	2.83724e-10	0.000128906	-0.515154	0	0	overlap
ENSG00000080224	cg10359143	0.571569	6.98979e-09	0.0031757	0.513587	0	0	overlap
ENSG00000177707	cg15136953	0.539729	6.79217e-08	0.0308592	0.551642	0	0	overlap
ENSG00000144824	cg21328779	-0.536041	8.61685e-08	0.0391493	-0.233079	0.000133954	1	fSpecific
ENSG00000174500	cg25462303	-0.547434	4.08092e-08	0.018541	-0.327952	5.54519e-08	0.0251938	overlap
ENSG00000174500	cg06510261	-0.547681	4.01359e-08	0.0182352	-0.385721	1.10307e-10	5.01162e-05	overlap
ENSG00000163608	cg02856124	-0.535383	8.98761e-08	0.0408338	-0.505771	0	0	overlap
ENSG00000206530	cg11921736	0.53619	8.53543e-08	0.0387794	0.458556	0	0	overlap
ENSG00000206530	cg24199400	0.539993	6.67679e-08	0.030335	0.428744	2.51451e-13	1.14243e-07	overlap
ENSG00000172020	cg05773207	0.594024	5.77864e-10	0.000262544	0.471609	0	0	overlap
ENSG00000172020	cg05893353	0.564736	1.195e-08	0.0054293	0.505914	0	0	overlap
ENSG00000114638	cg22842233	-0.553426	2.70862e-08	0.0123062	-0.506949	0	0	overlap
ENSG00000114638	cg01814130	-0.613681	0	0	-0.644249	0	0	overlap
ENSG00000114638	cg02741226	-0.625073	0	0	-0.647802	0	0	overlap
ENSG00000121578	cg11261958	-0.54182	5.92542e-08	0.0269213	-0.387624	8.77426e-11	3.98645e-05	overlap
ENSG00000175697	cg24942922	-0.686348	0	0	-0.454334	0	0	overlap
ENSG00000145087	cg20388967	0.567617	9.57856e-09	0.00435188	0.43817	1.28569e-14	5.84136e-09	overlap
ENSG00000180353	cg02167021	-0.751821	0	0	-0.743058	0	0	overlap
ENSG00000180353	cg00141162	-0.782409	0	0	-0.753331	0	0	overlap
ENSG00000180353	cg06577710	-0.778392	0	0	-0.745943	0	0	overlap
ENSG00000173230	cg14756353	-0.548422	3.81774e-08	0.0173453	-0.174411	0.00445092	1	fSpecific
ENSG00000138496	cg25932713	-0.540421	6.49321e-08	0.0295009	-0.381334	1.85601e-10	8.4325e-05	overlap
ENSG00000138496	cg00633969	-0.562876	1.37406e-08	0.00624283	-0.377976	2.7467e-10	0.000124792	overlap
ENSG00000163840	cg25932713	-0.547911	3.95169e-08	0.0179539	-0.322642	9.24462e-08	0.0420015	overlap
ENSG00000163840	cg00633969	-0.593003	6.94117e-10	0.000315362	-0.339463	1.77206e-08	0.00805107	overlap
ENSG00000065534	cg16212219	-0.533095	1.0396e-07	0.0472328	-0.402001	1.45095e-11	6.59218e-06	overlap
ENSG00000179348	cg09852607	0.564736	1.195e-08	0.0054293	0.512894	0	0	overlap
ENSG00000179348	cg13483882	0.612281	0	0	0.574797	0	0	overlap
ENSG00000179348	cg19638477	0.630572	0	0	0.596992	0	0	overlap
ENSG00000179348	cg16674492	0.554776	2.46491e-08	0.0111989	0.558002	0	0	overlap
ENSG00000179348	cg22978620	0.548092	3.90367e-08	0.0177357	0.600644	0	0	overlap
ENSG00000179348	cg22122410	0.581101	3.00692e-09	0.00136615	0.60007	0	0	overlap
ENSG00000179348	cg02436004	0.558398	1.90618e-08	0.00866043	0.584054	0	0	overlap
ENSG00000179348	cg06115614	0.552949	2.79995e-08	0.0127212	0.525888	0	0	overlap
ENSG00000179348	cg06490988	0.572425	6.51481e-09	0.00295991	0.509099	0	0	overlap
ENSG00000179348	cg07263393	0.546199	4.43351e-08	0.020143	0.503133	0	0	overlap
ENSG00000179348	cg04535236	0.623065	0	0	0.551137	0	0	overlap
ENSG00000172765	cg07443717	-0.598238	1.8944e-10	8.60693e-05	-0.488197	0	0	overlap
ENSG00000198585	cg00899856	-0.542808	5.55293e-08	0.0252289	-0.361062	1.83694e-09	0.000834586	overlap
ENSG00000081307	cg10453758	-0.536815	8.19957e-08	0.0372535	-0.364891	1.20699e-09	0.000548378	overlap
ENSG00000144868	cg24837219	0.629666	0	0	0.604323	0	0	overlap
ENSG00000154928	cg25785495	0.571997	6.74882e-09	0.00306622	0.68555	0	0	overlap
ENSG00000154928	cg11217666	0.702103	0	0	0.645611	0	0	overlap
ENSG00000154928	cg19497640	0.555468	2.34798e-08	0.0106677	0.539281	0	0	overlap
ENSG00000154928	cg20109001	0.580623	3.14911e-09	0.00143075	0.58451	0	0	overlap
ENSG00000154928	cg01363198	0.692258	0	0	0.722179	0	0	overlap
ENSG00000154928	cg03627881	0.607902	0	0	0.662204	0	0	overlap
ENSG00000174611	cg08140055	-0.574746	5.35918e-09	0.00243486	-0.446101	0	0	overlap
ENSG00000174564	cg22746584	-0.628234	0	0	-0.614939	0	0	overlap
ENSG00000066405	cg10602180	-0.611096	0	0	-0.386035	1.06226e-10	4.8262e-05	overlap
ENSG00000066405	cg10334121	-0.56872	8.785e-09	0.00399134	-0.334165	3.01258e-08	0.0136872	overlap
ENSG00000066405	cg18246056	-0.539169	7.04358e-08	0.0320015	-0.390328	6.31769e-11	2.87035e-05	overlap
ENSG00000066405	cg23008404	-0.607869	0	0	-0.373689	4.49725e-10	0.000204326	overlap
ENSG00000158163	cg09375033	-0.592345	7.74358e-10	0.000351818	-0.653155	0	0	overlap
ENSG00000183770	cg27326452	0.642771	0	0	0.66581	0	0	overlap
ENSG00000183770	cg11023900	0.677096	0	0	0.626068	0	0	overlap
ENSG00000183770	cg11930722	0.655694	0	0	0.650711	0	0	overlap
ENSG00000183770	cg11152347	0.579125	3.62829e-09	0.00164846	0.55202	0	0	overlap
ENSG00000183770	cg08031151	0.626505	0	0	0.631258	0	0	overlap
ENSG00000183770	cg09222023	0.532996	1.04613e-07	0.0475292	0.627974	0	0	overlap
ENSG00000183770	cg14504269	0.555698	2.31014e-08	0.0104958	0.607157	0	0	overlap
ENSG00000183770	cg19851029	0.580047	3.32735e-09	0.00151173	0.664632	0	0	overlap
ENSG00000183770	cg17769084	0.594304	5.47637e-10	0.000248811	0.608117	0	0	overlap
ENSG00000183770	cg24625136	0.618192	0	0	0.632369	0	0	overlap
ENSG00000183770	cg24851181	0.537359	7.91801e-08	0.0359743	0.504958	0	0	overlap
ENSG00000183770	cg21575509	0.646574	0	0	0.665493	0	0	overlap
ENSG00000183770	cg02019774	0.54289	5.5229e-08	0.0250924	0.560065	0	0	overlap
ENSG00000183770	cg02704158	0.539663	6.82131e-08	0.0309916	0.555335	0	0	overlap
ENSG00000183770	cg01711746	0.640104	0	0	0.607031	0	0	overlap
ENSG00000183770	cg07287724	0.651776	0	0	0.650399	0	0	overlap
ENSG00000183770	cg06970190	0.666955	0	0	0.668681	0	0	overlap
ENSG00000183770	cg05099537	0.684373	0	0	0.671645	0	0	overlap
ENSG00000206262	cg27326452	0.649257	0	0	0.69571	0	0	overlap
ENSG00000206262	cg11023900	0.661456	0	0	0.626427	0	0	overlap
ENSG00000206262	cg11930722	0.667531	0	0	0.670266	0	0	overlap
ENSG00000206262	cg11152347	0.619295	0	0	0.580848	0	0	overlap
ENSG00000206262	cg08031151	0.566794	1.02103e-08	0.00463887	0.631191	0	0	overlap
ENSG00000206262	cg09222023	0.54368	5.24218e-08	0.0238171	0.6534	0	0	overlap
ENSG00000206262	cg14504269	0.579965	3.35342e-09	0.00152358	0.621004	0	0	overlap
ENSG00000206262	cg19851029	0.603326	0	0	0.691907	0	0	overlap
ENSG00000206262	cg17769084	0.611211	0	0	0.616756	0	0	overlap
ENSG00000206262	cg24625136	0.635362	0	0	0.638989	0	0	overlap
ENSG00000206262	cg24851181	0.559271	1.78998e-08	0.00813248	0.551159	0	0	overlap
ENSG00000206262	cg21575509	0.646837	0	0	0.686489	0	0	overlap
ENSG00000206262	cg01711746	0.621056	0	0	0.609353	0	0	overlap
ENSG00000206262	cg07287724	0.66516	0	0	0.642618	0	0	overlap
ENSG00000206262	cg06970190	0.653356	0	0	0.644791	0	0	overlap
ENSG00000206262	cg05099537	0.642787	0	0	0.680365	0	0	overlap
ENSG00000114115	cg08972081	-0.625073	0	0	-0.49656	0	0	overlap
ENSG00000114115	cg12298268	-0.550084	3.40986e-08	0.0154922	-0.457036	0	0	overlap
ENSG00000114115	cg21476463	-0.597267	2.67117e-10	0.000121361	-0.491869	0	0	overlap
ENSG00000114115	cg22129809	-0.654064	0	0	-0.478929	0	0	overlap
ENSG00000114115	cg06726820	-0.701082	0	0	-0.61853	0	0	overlap
ENSG00000163864	cg03891318	-0.557904	1.97492e-08	0.00897274	-0.384674	1.24996e-10	5.679e-05	overlap
ENSG00000152952	cg06180356	-0.588311	1.3681e-09	0.000621576	-0.375846	3.5126e-10	0.00015959	overlap
ENSG00000152977	cg14750948	0.569758	8.09078e-09	0.00367593	0.382994	1.52605e-10	6.93337e-05	overlap
ENSG00000152977	cg22614239	0.546956	4.21405e-08	0.0191459	0.369764	7.01334e-10	0.000318641	overlap
ENSG00000152977	cg02390329	0.54531	4.70465e-08	0.0213749	0.393223	4.42381e-11	2.00989e-05	overlap
ENSG00000152977	cg01825295	0.627312	0	0	0.575232	0	0	overlap
ENSG00000152977	cg00028935	0.532831	1.05709e-07	0.0480271	0.414845	2.49471e-12	1.13343e-06	overlap
ENSG00000152977	cg05716671	0.562975	1.36399e-08	0.00619708	0.478977	0	0	overlap
ENSG00000018408	cg23017915	-0.544586	4.93688e-08	0.02243	-0.530344	0	0	overlap
ENSG00000070087	cg10636490	-0.544964	4.81419e-08	0.0218725	-0.516757	0	0	overlap
ENSG00000169860	cg14921522	-0.556373	2.20248e-08	0.0100066	-0.536764	0	0	overlap
ENSG00000169860	cg03293976	-0.552439	2.90069e-08	0.0131788	-0.528018	0	0	overlap
ENSG00000169860	cg06809364	-0.581677	2.84171e-09	0.00129109	-0.626189	0	0	overlap
ENSG00000168779	cg09095222	0.535712	8.80039e-08	0.0399833	0.405686	8.92235e-12	4.05373e-06	overlap
ENSG00000168779	cg09220088	0.574861	5.3065e-09	0.00241093	0.471578	0	0	overlap
ENSG00000168779	cg15726154	0.626176	0	0	0.609251	0	0	overlap
ENSG00000168779	cg21847036	0.577709	4.13067e-09	0.00187671	0.510423	0	0	overlap
ENSG00000168779	cg04913979	0.558299	1.91975e-08	0.00872209	0.442668	0	0	overlap
ENSG00000174891	cg27642784	0.565691	1.11131e-08	0.00504906	0.452557	0	0	overlap
ENSG00000174891	cg12993163	0.570663	7.52333e-09	0.00341811	0.506831	0	0	overlap
ENSG00000174891	cg18194945	0.603869	0	0	0.437838	1.61867e-14	7.35419e-09	overlap
ENSG00000079257	cg25727025	-0.545442	4.66353e-08	0.021188	-0.59635	0	0	overlap
ENSG00000079257	cg08263647	-0.659974	0	0	-0.592121	0	0	overlap
ENSG00000079257	cg07654934	-0.540651	6.39632e-08	0.0290607	-0.58977	0	0	overlap
ENSG00000079257	cg17481912	-0.639215	0	0	-0.605578	0	0	overlap
ENSG00000079257	cg17977250	-0.672667	0	0	-0.603989	0	0	overlap
ENSG00000079257	cg22210627	-0.592131	8.0136e-10	0.000364086	-0.613785	0	0	overlap
ENSG00000079257	cg04911005	-0.537145	8.02782e-08	0.0364732	-0.584517	0	0	overlap
ENSG00000163590	cg22114979	0.576145	4.74725e-09	0.00215684	0.428746	2.51355e-13	1.14199e-07	overlap
ENSG00000169255	cg12881321	-0.567683	9.52951e-09	0.00432959	-0.530227	0	0	overlap
ENSG00000174776	cg25837984	0.566695	1.02884e-08	0.00467439	0.532439	0	0	overlap
ENSG00000174776	cg18142906	0.571404	7.08436e-09	0.00321867	0.540785	0	0	overlap
ENSG00000114209	cg18801567	-0.53293	1.0505e-07	0.0477278	-0.29056	1.66671e-06	0.757244	fSpecific
ENSG00000163577	cg07728092	-0.590386	1.03947e-09	0.000472269	-0.394516	3.7663e-11	1.71116e-05	overlap
ENSG00000163577	cg16450309	-0.541639	5.99619e-08	0.0272428	-0.424545	5.44223e-13	2.4726e-07	overlap
ENSG00000075651	cg04107939	-0.57147	7.0464e-09	0.00320143	-0.465902	0	0	overlap
ENSG00000161203	cg06192549	-0.561032	1.57453e-08	0.00715364	-0.369197	7.47421e-10	0.00033958	overlap
ENSG00000175182	cg25734279	-0.537556	7.81789e-08	0.0355194	-0.265551	1.26908e-05	1	fSpecific
ENSG00000113790	cg23361969	-0.583603	2.33709e-09	0.00106182	-0.424842	5.16927e-13	2.34858e-07	overlap
ENSG00000073803	cg15128334	-0.536766	8.22563e-08	0.0373719	-0.20765	0.00068671	1	fSpecific
ENSG00000058866	cg15367247	-0.581874	2.78664e-09	0.00126607	-0.378985	2.44298e-10	0.000110993	overlap
ENSG00000058866	cg17293936	0.538478	7.36618e-08	0.0334671	0.34396	1.1208e-08	0.0050922	overlap
ENSG00000058866	cg02749735	0.573873	5.77199e-09	0.00262242	0.329501	4.76836e-08	0.0216643	overlap
ENSG00000136514	cg26824216	-0.695255	0	0	-0.662138	0	0	overlap
ENSG00000136514	cg15701237	-0.72446	0	0	-0.696558	0	0	overlap
ENSG00000136514	cg19383430	-0.669309	0	0	-0.60997	0	0	overlap
ENSG00000136514	cg04935109	-0.621007	0	0	-0.654266	0	0	overlap
ENSG00000163347	cg25330387	-0.709281	0	0	-0.681332	0	0	overlap
ENSG00000163347	cg03623835	-0.574054	5.68425e-09	0.00258255	-0.551539	0	0	overlap
ENSG00000113946	cg25330387	-0.66088	0	0	-0.553309	0	0	overlap
ENSG00000113946	cg03623835	-0.561674	1.50196e-08	0.00682392	-0.474099	0	0	overlap
ENSG00000114279	cg07670240	0.578121	3.9794e-09	0.00180798	0.340097	1.66196e-08	0.00755088	overlap
ENSG00000114279	cg22830694	0.599802	7.73865e-11	3.51594e-05	0.530796	0	0	overlap
ENSG00000114279	cg07127762	0.54913	3.63888e-08	0.0165327	0.364146	1.31041e-09	0.000595365	overlap
ENSG00000127252	cg10358939	0.684323	0	0	0.555836	0	0	overlap
ENSG00000127252	cg16273485	0.738766	0	0	0.697951	0	0	overlap
ENSG00000187527	cg05503824	0.663053	0	0	0.482132	0	0	overlap
ENSG00000176945	cg05012239	-0.618801	0	0	-0.62291	0	0	overlap
ENSG00000145113	cg08521684	0.638606	0	0	0.465078	0	0	overlap
ENSG00000145113	cg15952060	0.651628	0	0	0.513401	0	0	overlap
ENSG00000163958	cg02039400	-0.538791	7.21856e-08	0.0327965	-0.396172	3.0603e-11	1.3904e-05	overlap
ENSG00000163964	cg20531872	-0.579602	3.46997e-09	0.00157653	-0.367402	9.13614e-10	0.000415087	overlap
ENSG00000180370	cg15721238	-0.592806	7.17746e-10	0.000326097	-0.501362	0	0	overlap
ENSG00000250312	cg10197305	-0.613615	0	0	-0.54079	0	0	overlap
ENSG00000250312	cg12717203	-0.553789	2.64117e-08	0.0119997	-0.545956	0	0	overlap
ENSG00000186777	cg20241375	0.590698	9.94352e-10	0.000451769	0.366464	1.01406e-09	0.000460721	overlap
ENSG00000133256	cg11164441	0.638918	0	0	0.624841	0	0	overlap
ENSG00000178222	cg21126229	-0.646656	0	0	-0.395117	3.49372e-11	1.58732e-05	overlap
ENSG00000178222	cg26855280	0.568523	8.92284e-09	0.00405396	0.361797	1.69539e-09	0.000770277	overlap
ENSG00000178222	cg24939846	0.648763	0	0	0.466682	0	0	overlap
ENSG00000178222	cg05924254	-0.555484	2.34526e-08	0.0106553	-0.398316	2.33251e-11	1.05974e-05	overlap
ENSG00000068078	cg08145949	-0.656468	0	0	-0.467213	0	0	overlap
ENSG00000087266	cg17749374	-0.534823	9.31449e-08	0.042319	-0.314133	2.05629e-07	0.0934243	fSpecific
ENSG00000175920	cg01417823	0.552932	2.80315e-08	0.0127357	0.531506	0	0	overlap
ENSG00000168824	cg09852389	0.649257	0	0	0.652307	0	0	overlap
ENSG00000168824	cg11249129	0.594896	4.8587e-10	0.000220748	0.54828	0	0	overlap
ENSG00000152953	cg12044923	0.538725	7.24941e-08	0.0329366	0.514944	0	0	overlap
ENSG00000173040	cg19101433	0.644598	0	0	0.461196	0	0	overlap
ENSG00000173040	cg27434509	-0.548767	3.7294e-08	0.016944	-0.463677	0	0	overlap
ENSG00000173040	cg27197503	0.573132	6.14258e-09	0.00279079	0.422732	7.38956e-13	3.35734e-07	overlap
ENSG00000173040	cg06669056	0.562432	1.42019e-08	0.00645243	0.500463	0	0	overlap
ENSG00000173040	cg06426416	-0.585052	2.0019e-09	0.000909533	-0.55213	0	0	overlap
ENSG00000173040	cg17384436	0.597547	2.44066e-10	0.000110888	0.449907	0	0	overlap
ENSG00000173040	cg13256598	0.55611	2.24394e-08	0.010195	0.451602	0	0	overlap
ENSG00000173040	cg14654886	-0.536074	8.59869e-08	0.0390669	-0.500237	0	0	overlap
ENSG00000074211	cg22325673	0.595456	4.30243e-10	0.000195474	0.489892	0	0	overlap
ENSG00000074211	cg18544809	0.536091	8.58963e-08	0.0390257	0.422358	7.85779e-13	3.57007e-07	overlap
ENSG00000074211	cg01208224	0.534823	9.31449e-08	0.042319	0.368817	7.79984e-10	0.000354374	overlap
ENSG00000074211	cg01253818	0.624135	0	0	0.442243	0	0	overlap
ENSG00000074211	cg01839898	0.602453	0	0	0.504956	0	0	overlap
ENSG00000074211	cg07447870	0.654575	0	0	0.530674	0	0	overlap
ENSG00000163993	cg14900031	-0.532453	1.0827e-07	0.049191	-0.523409	0	0	overlap
ENSG00000184985	cg25091367	0.536535	8.34826e-08	0.0379291	0.354795	3.60876e-09	0.00163959	overlap
ENSG00000184985	cg14383572	0.606404	0	0	0.519295	0	0	overlap
ENSG00000163995	cg18007268	0.540618	6.41008e-08	0.0291232	0.4813	0	0	overlap
ENSG00000163995	cg19588649	0.650047	0	0	0.507055	0	0	overlap
ENSG00000163995	cg25310559	0.536239	8.50845e-08	0.0386569	0.457531	0	0	overlap
ENSG00000163995	cg00338519	0.583521	2.35724e-09	0.00107097	0.42127	9.37419e-13	4.25902e-07	overlap
ENSG00000163995	cg00262159	0.539696	6.80673e-08	0.0309253	0.544877	0	0	overlap
ENSG00000163995	cg00322262	0.559633	1.74364e-08	0.00792196	0.5744	0	0	overlap
ENSG00000163995	cg00130393	0.532469	1.08158e-07	0.0491399	0.435842	4.14428e-14	1.88289e-08	overlap
ENSG00000163995	cg05719818	0.677145	0	0	0.590952	0	0	overlap
ENSG00000163995	cg04718733	0.54075	6.35521e-08	0.0288739	0.324266	7.91453e-08	0.0359585	overlap
ENSG00000163995	cg02500960	0.593843	5.97793e-10	0.000271598	0.488299	0	0	overlap
ENSG00000163995	cg04492193	0.547269	4.12638e-08	0.0187476	0.381965	1.72325e-10	7.82933e-05	overlap
ENSG00000163995	cg11003309	0.633486	0	0	0.613573	0	0	overlap
ENSG00000163995	cg13130338	0.627542	0	0	0.47875	0	0	overlap
ENSG00000125089	cg07816074	-0.534478	9.52194e-08	0.0432615	-0.398541	2.26672e-11	1.02985e-05	overlap
ENSG00000109667	cg25117600	-0.620249	0	0	-0.489549	0	0	overlap
ENSG00000109667	cg02387843	0.663349	0	0	0.479904	0	0	overlap
ENSG00000109667	cg16785938	-0.725513	0	0	-0.655916	0	0	overlap
ENSG00000109667	cg14959260	0.608116	0	0	0.396639	2.88538e-11	1.31093e-05	overlap
ENSG00000197057	cg21010701	-0.532782	1.0604e-07	0.0481775	-0.224455	0.000237982	1	fSpecific
ENSG00000064042	cg15162330	-0.560077	1.68824e-08	0.00767028	-0.417221	1.75563e-12	7.97643e-07	overlap
ENSG00000109189	cg10098221	-0.537342	7.9264e-08	0.0360124	-0.397419	2.6144e-11	1.18781e-05	overlap
ENSG00000090989	cg18463607	-0.544224	5.05696e-08	0.0229755	-0.51244	0	0	overlap
ENSG00000150471	cg21889448	0.573577	5.91796e-09	0.00268873	0.571326	0	0	overlap
ENSG00000187054	cg23734503	-0.693789	0	0	-0.538222	0	0	overlap
ENSG00000187054	cg08789697	-0.603556	0	0	-0.41033	4.73961e-12	2.15337e-06	overlap
ENSG00000081051	cg10778295	0.535893	8.69899e-08	0.0395226	0.292728	1.38503e-06	0.629267	fSpecific
ENSG00000152784	cg02941135	0.547006	4.20009e-08	0.0190825	0.54068	0	0	overlap
ENSG00000152784	cg03311556	0.542594	5.63173e-08	0.0255869	0.510461	0	0	overlap
ENSG00000145284	cg03650550	-0.541244	6.15335e-08	0.0279568	-0.462864	0	0	overlap
ENSG00000145284	cg11188666	-0.73903	0	0	-0.561975	0	0	overlap
ENSG00000145284	cg13497089	-0.565527	1.12536e-08	0.00511291	-0.52194	0	0	overlap
ENSG00000145287	cg23586595	-0.654048	0	0	-0.449097	0	0	overlap
ENSG00000163623	cg01227239	0.555912	2.2755e-08	0.0103384	0.365581	1.11834e-09	0.000508099	overlap
ENSG00000109339	cg17452384	-0.664666	0	0	-0.690133	0	0	overlap
ENSG00000152583	cg19466563	-0.652616	0	0	-0.491775	0	0	overlap
ENSG00000152583	cg15552249	-0.582549	2.60432e-09	0.00118323	-0.379834	2.21262e-10	0.000100527	overlap
ENSG00000177432	cg18607468	-0.647973	0	0	-0.681836	0	0	overlap
ENSG00000177432	cg27150681	-0.681738	0	0	-0.724082	0	0	overlap
ENSG00000177432	cg23954636	-0.740001	0	0	-0.668458	0	0	overlap
ENSG00000177432	cg01578057	-0.666148	0	0	-0.726813	0	0	overlap
ENSG00000177432	cg01174175	-0.694711	0	0	-0.693557	0	0	overlap
ENSG00000177432	cg05065100	-0.705379	0	0	-0.699547	0	0	overlap
ENSG00000177432	cg06617468	-0.654212	0	0	-0.686494	0	0	overlap
ENSG00000177432	cg05898246	-0.622488	0	0	-0.656797	0	0	overlap
ENSG00000177432	cg11300971	-0.617237	0	0	-0.683925	0	0	overlap
ENSG00000177432	cg07539802	-0.675548	0	0	-0.683942	0	0	overlap
ENSG00000177432	cg17635114	-0.67298	0	0	-0.69156	0	0	overlap
ENSG00000177432	cg13610072	-0.671811	0	0	-0.706059	0	0	overlap
ENSG00000177432	cg12759554	-0.704342	0	0	-0.72203	0	0	overlap
ENSG00000138798	cg24818418	-0.668025	0	0	-0.666662	0	0	overlap
ENSG00000138798	cg14571493	-0.611491	0	0	-0.63082	0	0	overlap
ENSG00000164093	cg20992114	-0.561806	1.48744e-08	0.00675798	-0.574967	0	0	overlap
ENSG00000164093	cg24430580	-0.559518	1.75826e-08	0.00798841	-0.420189	1.11293e-12	5.05644e-07	overlap
ENSG00000164093	cg05835105	-0.611524	0	0	-0.421518	9.00834e-13	4.0928e-07	overlap
ENSG00000180801	cg12214451	-0.593761	6.0695e-10	0.000275758	-0.559557	0	0	overlap
ENSG00000138685	cg21550024	-0.666197	0	0	-0.523597	0	0	overlap
ENSG00000138685	cg03941587	-0.635362	0	0	-0.477073	0	0	overlap
ENSG00000138685	cg11327857	-0.663168	0	0	-0.528648	0	0	overlap
ENSG00000138685	cg17214107	-0.689196	0	0	-0.555824	0	0	overlap
ENSG00000138685	cg15128226	-0.66223	0	0	-0.501121	0	0	overlap
ENSG00000151458	cg19898448	-0.574054	5.68425e-09	0.00258255	-0.611982	0	0	overlap
ENSG00000254535	cg18236571	-0.535136	9.13047e-08	0.0414829	-0.520368	0	0	overlap
ENSG00000151012	cg04487857	0.539153	7.05111e-08	0.0320356	0.41074	4.47619e-12	2.03369e-06	overlap
ENSG00000170153	cg01202265	-0.620727	0	0	-0.471575	0	0	overlap
ENSG00000151617	cg00974629	-0.573034	6.19344e-09	0.0028139	-0.504419	0	0	overlap
ENSG00000109472	cg01708636	-0.581907	2.77753e-09	0.00126193	-0.431174	1.50904e-13	6.85611e-08	overlap
ENSG00000109472	cg11043571	-0.592674	7.33708e-10	0.000333349	-0.455313	0	0	overlap
ENSG00000164107	cg21383280	0.574417	5.51203e-09	0.00250431	0.429184	2.30251e-13	1.04611e-07	overlap
ENSG00000164107	cg19095920	0.56146	1.52581e-08	0.00693229	0.389585	6.91772e-11	3.14296e-05	overlap
ENSG00000164107	cg26805882	0.5704	7.68483e-09	0.00349149	0.469259	0	0	overlap
ENSG00000164107	cg04699272	0.53321	1.03204e-07	0.0468892	0.398744	2.20869e-11	1.00349e-05	overlap
ENSG00000150630	cg12500811	0.563107	1.35066e-08	0.00613654	0.495788	0	0	overlap
ENSG00000218336	cg03867465	0.547203	4.14469e-08	0.0188308	0.544293	0	0	overlap
ENSG00000153404	cg02088166	0.658855	0	0	0.649224	0	0	overlap
ENSG00000153404	cg09022852	0.631757	0	0	0.58971	0	0	overlap
ENSG00000153404	cg08588156	0.622851	0	0	0.629382	0	0	overlap
ENSG00000153404	cg26520739	0.556818	2.13409e-08	0.0096959	0.549123	0	0	overlap
ENSG00000153404	cg27022324	0.606272	0	0	0.648033	0	0	overlap
ENSG00000153404	cg14846981	0.548833	3.71279e-08	0.0168685	0.58425	0	0	overlap
ENSG00000153404	cg15195910	0.60084	1.12258e-11	5.10029e-06	0.620245	0	0	overlap
[truncated: 24,587 more rows]

## Sheet: COAD
Ename	Mname	corr.f	corrpval.f	bonf.f	corr.m	corrpval.m	bonf.m	label
[truncated: 10,444 more rows]

[truncated: 5 more sheets: KIRC, KIRP, THCA, BLCA, HNSC]
