# Supplementary material for: Attenuated sex-related DNA methylation differences in cancer highlight the magnitude bias mediating existing disparities
Source: Biol Sex Differ. 2024 Dec 23;15:106. doi: 10.1186/s13293-024-00682-4 (PMC11664931; doi:10.1186/s13293-024-00682-4)
Supplement: Supplementary file 18 — Supplementary material 18. [file 13293_2024_682_MOESM18_ESM.xlsx]

## Sheet: cCREs enrich
Cancer	sex	Direction	description	support	pValueLog	oddsRatio	qValue
LIHC	Female	negative	Proximal enhancer	1270	158.98	3.25834	4.19202e-159
LIHC	Female	negative	Promoter	929	110.8	2.78702	3.17147e-111
LIHC	Female	negative	Distal enhancer	313	0	0.418568	1
LIHC	Female	negative	Insulator	0	0	0	1
LIHC	Male	negative	Proximal enhancer	3302	292.109	2.59046	3.11092e-292
LIHC	Male	negative	Promoter	2056	97.7011	1.81844	3.98038e-98
LIHC	Male	negative	Insulator	4	3.07264e-12	0.114204	1
LIHC	Male	negative	Distal enhancer	1369	0	0.69321	1
LUAD	Female	negative	Proximal enhancer	4013	322.005	3.08016	0
LUAD	Female	negative	Promoter	2517	167.268	2.07176	1.0792e-167
LUAD	Female	negative	Insulator	2	9.64327e-17	0.0494182	1
LUAD	Female	negative	Distal enhancer	1518	0	0.680501	1
LUAD	Male	negative	Proximal enhancer	3243	322.005	3.20378	0
LUAD	Male	negative	Promoter	2057	152.019	2.16544	1.9164e-152
LUAD	Male	negative	Distal enhancer	1147	0	0.640594	1
LUAD	Male	negative	Insulator	0	0	0	1
LUSC	Female	negative	Proximal enhancer	666	98.7893	3.77011	6.49836e-99
LUSC	Female	negative	Promoter	450	50.3082	2.65583	9.83554e-51
LUSC	Female	negative	Distal enhancer	138	0	0.37332	1
LUSC	Female	negative	Insulator	0	0	0	1
LUSC	Male	negative	Proximal enhancer	4009	322.005	2.87952	0
LUSC	Male	negative	Promoter	2336	98.5901	1.75321	5.13986e-99
LUSC	Male	negative	Insulator	2	9.64327e-17	0.0494179	1
LUSC	Male	negative	Distal enhancer	1622	0	0.725764	1
COAD	Female	negative	Proximal enhancer	1633	216.421	3.38899	1.51602e-216
COAD	Female	negative	Promoter	1151	133.911	2.73148	2.45211e-134
COAD	Female	negative	Insulator	1	9.09364e-08	0.0645932	1
COAD	Female	negative	Distal enhancer	478	0	0.516325	1
COAD	Male	negative	Proximal enhancer	2094	273.051	3.35237	3.55833e-273
COAD	Male	negative	Promoter	1416	144.011	2.52599	1.94946e-144
COAD	Male	negative	Insulator	2	2.15591e-08	0.0999558	1
COAD	Male	negative	Distal enhancer	651	0	0.551128	1
KIRC	Female	negative	Proximal enhancer	411	31.8633	2.32783	5.47992e-32
KIRC	Female	negative	Promoter	298	23.5754	2.16519	5.3169e-24
KIRC	Female	negative	Distal enhancer	196	0.000546269	0.78625	1
KIRC	Female	negative	Insulator	0	0	0	1
KIRC	Male	negative	Proximal enhancer	1951	126.595	2.17274	1.0167e-126
KIRC	Male	negative	Promoter	1229	44.942	1.65948	2.28563e-45
KIRC	Male	negative	Distal enhancer	1188	0.912188	1.04202	0.163211
KIRC	Male	negative	Insulator	1	5.38064e-11	0.0434502	1
KIRP	Female	negative	Proximal enhancer	398	41.2605	2.76981	2.19582e-41
KIRP	Female	negative	Promoter	306	36.6359	2.72884	4.62569e-37
KIRP	Female	negative	Insulator	1	0.00768832	0.246849	0.999999
KIRP	Female	negative	Distal enhancer	153	3.54113e-07	0.658811	0.999999
KIRP	Male	negative	Proximal enhancer	2707	234.721	2.53687	7.59879e-235
KIRP	Male	negative	Promoter	1750	99.5109	1.92979	6.16795e-100
KIRP	Male	negative	Distal enhancer	1317	7.41797e-09	0.839609	1
KIRP	Male	negative	Insulator	4	4.8367e-10	0.13644	1
THCA	Female	negative	Proximal enhancer	2530	140.587	2.03058	1.03526e-140
THCA	Female	negative	Promoter	1545	39.415	1.51436	7.6925e-40
THCA	Female	negative	Distal enhancer	1780	10.467	1.21305	4.54893e-11
THCA	Female	negative	Insulator	3	8.76236e-12	0.0961987	1
THCA	Male	negative	Proximal enhancer	734	33.3355	1.84989	1.84753e-33
THCA	Male	negative	Promoter	524	24.429	1.76768	7.44732e-25
THCA	Male	negative	Distal enhancer	509	1.53085	1.10848	0.0392722
THCA	Male	negative	Insulator	1	3.93477e-05	0.106947	0.999909
BLCA	Female	negative	Proximal enhancer	820	142.401	4.41834	1.58962e-142
BLCA	Female	negative	Promoter	614	103.87	3.60501	2.70076e-104
BLCA	Female	negative	Distal enhancer	125	0	0.278082	1
BLCA	Female	negative	Insulator	0	0	0	1
BLCA	Male	negative	Proximal enhancer	4406	322.005	3.64199	0
BLCA	Male	negative	Promoter	2652	193.982	2.16303	2.08629e-194
BLCA	Male	negative	Insulator	4	1.33077e-14	0.0974204	1
BLCA	Male	negative	Distal enhancer	1243	0	0.51144	1
HNSC	Female	negative	Promoter	699	151.987	4.59912	4.11974e-152
HNSC	Female	negative	Proximal enhancer	795	121.58	3.85095	5.25707e-122
HNSC	Female	negative	Distal enhancer	136	0	0.299025	1
HNSC	Female	negative	Insulator	0	0	0	1
HNSC	Male	negative	Proximal enhancer	4173	322.005	3.16161	0
HNSC	Male	negative	Promoter	2709	215.442	2.2467	7.22487e-216
HNSC	Male	negative	Insulator	9	1.89163e-10	0.217768	1
HNSC	Male	negative	Distal enhancer	1408	0	0.594281	1
LIHC	Female	positive	Distal enhancer	1254	20.6951	1.40875	8.07244e-21
LIHC	Female	positive	Insulator	21	0.446157	1.10338	0.715934
LIHC	Female	positive	Proximal enhancer	365	0	0.257371	1
LIHC	Female	positive	Promoter	136	0	0.145351	1
LIHC	Male	positive	Distal enhancer	3734	66.458	1.4474	1.39329e-66
LIHC	Male	positive	Insulator	63	0.715669	1.12768	0.384911
LIHC	Male	positive	Proximal enhancer	1186	0	0.280946	1
LIHC	Male	positive	Promoter	466	0	0.165983	1
LUAD	Female	positive	Distal enhancer	1775	6.93931	1.16437	4.5999e-07
LUAD	Female	positive	Insulator	48	2.54431	1.55743	0.00571105
LUAD	Female	positive	Proximal enhancer	598	0	0.261505	1
LUAD	Female	positive	Promoter	214	0	0.141133	1
LUAD	Male	positive	Insulator	62	3.37457	1.60341	0.00168846
LUAD	Male	positive	Distal enhancer	2133	3.02138	1.0859	0.00190393
LUAD	Male	positive	Proximal enhancer	706	0	0.241773	1
LUAD	Male	positive	Promoter	241	0	0.124839	1
LUSC	Female	positive	Distal enhancer	439	2.30897	1.165	0.0196376
LUSC	Female	positive	Insulator	9	0.457263	1.18945	0.697857
LUSC	Female	positive	Proximal enhancer	186	0	0.337654	1
LUSC	Female	positive	Promoter	54	0	0.143685	1
LUSC	Male	positive	Distal enhancer	3764	33.7103	1.28843	7.79454e-34
LUSC	Male	positive	Insulator	87	3.08315	1.4511	0.0016515
LUSC	Male	positive	Proximal enhancer	1300	0	0.277148	1
LUSC	Male	positive	Promoter	465	0	0.148223	1
COAD	Female	positive	Distal enhancer	605	6.05161	1.27723	3.55184e-06
COAD	Female	positive	Insulator	15	1.12311	1.53025	0.150632
COAD	Female	positive	Proximal enhancer	185	0	0.262811	1
COAD	Female	positive	Promoter	67	0	0.145533	1
COAD	Male	positive	Distal enhancer	923	19.1967	1.4722	2.54335e-19
COAD	Male	positive	Insulator	18	0.81231	1.31468	0.30812
COAD	Male	positive	Proximal enhancer	289	0	0.298141	1
COAD	Male	positive	Promoter	102	0	0.159092	1
KIRC	Female	positive	Distal enhancer	42	2.77865	1.88563	0.00665897
KIRC	Female	positive	Proximal enhancer	17	0.00047043	0.480075	1
KIRC	Female	positive	Promoter	7	1.94354e-05	0.289071	1
KIRC	Female	positive	Insulator	0	0	0	1
KIRC	Male	positive	Distal enhancer	200	7.48475	1.66389	1.31011e-07
KIRC	Male	positive	Insulator	3	0.273881	1.07035	1
KIRC	Male	positive	Proximal enhancer	96	1.55715e-09	0.540472	1
KIRC	Male	positive	Promoter	44	1.63936e-14	0.360644	1
KIRP	Female	positive	Distal enhancer	44	1.45931	1.44406	0.138916
KIRP	Female	positive	Insulator	1	0.314154	1.51556	0.970232
KIRP	Female	positive	Proximal enhancer	29	0.0240074	0.72885	0.998918
KIRP	Female	positive	Promoter	13	0.000470263	0.455631	0.998918
KIRP	Male	positive	Distal enhancer	556	16.777	1.60251	6.68452e-17
KIRP	Male	positive	Insulator	10	0.57744	1.27705	0.529163
KIRP	Male	positive	Proximal enhancer	331	2.81856e-10	0.691561	1
KIRP	Male	positive	Promoter	149	0	0.437023	1
THCA	Female	positive	Distal enhancer	815	30.2563	1.71446	2.21696e-30
THCA	Female	positive	Insulator	16	0.983159	1.43251	0.207908
THCA	Female	positive	Proximal enhancer	442	0	0.648631	1
THCA	Female	positive	Promoter	166	0	0.339935	1
THCA	Male	positive	Distal enhancer	184	9.03012	1.82556	3.73197e-09
THCA	Male	positive	Insulator	2	0.154182	0.818769	1
THCA	Male	positive	Proximal enhancer	110	0.00380411	0.776959	1
THCA	Male	positive	Promoter	40	6.25632e-12	0.382388	1
BLCA	Female	positive	Distal enhancer	910	10.8911	1.32354	5.1405e-11
BLCA	Female	positive	Insulator	9	0.0202093	0.614052	1
BLCA	Female	positive	Proximal enhancer	235	0	0.214443	1
BLCA	Female	positive	Promoter	75	0	0.105006	1
BLCA	Male	positive	Distal enhancer	4804	64.3214	1.37505	1.90846e-64
BLCA	Male	positive	Insulator	83	0.679202	1.10226	0.418628
BLCA	Male	positive	Proximal enhancer	1469	0	0.253686	1
BLCA	Male	positive	Promoter	504	0	0.131415	1
HNSC	Female	positive	Distal enhancer	544	3.93203	1.21742	0.000467768
HNSC	Female	positive	Insulator	13	0.849078	1.41267	0.283108
HNSC	Female	positive	Proximal enhancer	207	0	0.316654	1
HNSC	Female	positive	Promoter	61	0	0.138595	1
HNSC	Male	positive	Distal enhancer	3316	33.6776	1.31006	8.40393e-34
HNSC	Male	positive	Insulator	73	2.16741	1.37192	0.0136026
HNSC	Male	positive	Proximal enhancer	1060	0	0.265523	1
HNSC	Male	positive	Promoter	368	0	0.139139	1
