# Supplementary material for: Attenuated sex-related DNA methylation differences in cancer highlight the magnitude bias mediating existing disparities
Source: Biol Sex Differ. 2024 Dec 23;15:106. doi: 10.1186/s13293-024-00682-4 (PMC11664931; doi:10.1186/s13293-024-00682-4)
Supplement: Supplementary file 19 — Supplementary material 19. [file 13293_2024_682_MOESM19_ESM.xlsx]

## Sheet: female
Cancer	eQTM information						Methylation infomation									Expression information							Druggable gene
	eQTM	Corr.female	Corr.male	Cor.bonf.female	Cor.bonf.male	Label	CpG	Group	ES.female	ES.male	Bonf.female	Bonf.male	CHR	MAPINFO	feat.cgi	Ename	eGene	entrez	ES.female	Bonf.female	ES.male	Bonf.male
LIHC	ENSG00000115129_cg07979316	-0.501014	-0.299441	0.00172785	0.441586	fSpecific	cg07979316	femaleAmplifier	-0.143057	-0.0647953	5.24127e-09	7.71369e-05	2	24306908	Body-shore	ENSG00000115129	TP53I3	9540	1.59387	0.000398483	0.777313	0.0293884
LIHC	ENSG00000119280_cg02206259	-0.534912	-0.315667	4.68573e-05	0.105728	fSpecific	cg02206259	femaleAmplifier	-0.0656178	-0.0242091	0.0359328	1	1	231003485	Body-shore	ENSG00000119280	C1orf198	84886	0.86701	0.0212868	1.02479	0.000111907
LIHC	ENSG00000125945_cg16696234	-0.522704	-0.16959	0.000229278	1	fSpecific	cg16696234	femaleAmplifier	-0.123693	-0.0707843	0.00390397	0.0017785	1	23697297	3'UTR-shore	ENSG00000125945	ZNF436	80818	0.46675	0.00586153	0.559674	6.93755e-05
LIHC	ENSG00000126838_cg01714932	-0.590108	-0.240997	0	1	fSpecific	cg01714932	femaleAmplifier	0.218976	0.0287911	4.75658e-12	1	12	9360854	1stExon-opensea	ENSG00000126838	PZP	5858	-6.76054	4.29933e-08	-3.33047	0.000132404
LIHC	ENSG00000126838_cg08729600	-0.552424	-0.464471	0	0	overlap	cg08729600	femaleAmplifier	0.30572	0.0853641	5.75536e-07	1	12	9360986	TSS200-opensea	ENSG00000126838	PZP	5858	-6.76054	4.29933e-08	-3.33047	0.000132404
LIHC	ENSG00000126838_cg10479063	-0.677186	-0.488485	0	0	overlap	cg10479063	femaleAmplifier	0.255657	0.05687	1.41848e-11	1	12	9360933	1stExon-opensea	ENSG00000126838	PZP	5858	-6.76054	4.29933e-08	-3.33047	0.000132404
LIHC	ENSG00000162426_cg00341060	-0.469419	-0.160525	0.0200899	1	fSpecific	cg00341060	femaleAmplifier	-0.111837	-0.0530052	0.000860586	1	1	8377787	IGR-island	ENSG00000162426	SLC45A1	50651	1.61099	1.42848e-07	1.52261	4.19134e-09
LIHC	ENSG00000173894_cg01307507	-0.501075	-0.194223	0.00171895	1	fSpecific	cg01307507	femaleAmplifier	-0.0697955	-0.0266671	0.0241522	1	17	77751480	TSS1500-island	ENSG00000173894	CBX2	84733	1.47055	0.000946063	1.05593	0.0157725
LUAD	ENSG00000006638_cg25597797	0.377388	0.373581	0.00132715	0.0131113	overlap	cg25597797	femaleAmplifier	-0.167649	-0.0827499	0.0113014	1	19	3589762	Body-shelf	ENSG00000006638	TBXA2R	6915	-1.20445	8.38257e-07	-1.0362	0.00050939
LUAD	ENSG00000047617_cg00216961	0.346213	0.262747	0.0272035	1	fSpecific	cg00216961	femaleAmplifier	-0.301582	-0.2063	2.04333e-16	9.02745e-05	12	6054731	Body-opensea	ENSG00000047617	ANO2	57101	-1.65674	3.5811e-09	-1.48162	2.36833e-06
LUAD	ENSG00000066056_cg12739119	-0.381274	-0.380541	0.000889978	0.00695537	overlap	cg12739119	femaleAmplifier	0.200282	0.146804	1.69708e-62	4.38443e-28	1	43770523	Body-island	ENSG00000066056	TIE1	7075	-1.51666	1.52209e-11	-1.41206	2.81467e-07
LUAD	ENSG00000101331_cg01772014	0.450313	0.443481	7.39503e-08	9.24281e-06	overlap	cg01772014	femaleAmplifier	-0.223349	-0.184329	9.83768e-31	3.53546e-27	20	30606095	Body-shore	ENSG00000101331	CCM2L	140706	-2.19762	3.04544e-14	-1.75541	2.09304e-10
LUAD	ENSG00000101331_cg10109215	0.376872	0.315807	0.0013989	1	fSpecific	cg10109215	femaleAmplifier	-0.121691	-0.0659021	3.37024e-07	1	20	30605810	Body-island	ENSG00000101331	CCM2L	140706	-2.19762	3.04544e-14	-1.75541	2.09304e-10
LUAD	ENSG00000108219_cg22633936	-0.411326	-0.254887	3.26622e-05	1	fSpecific	cg22633936	femaleAmplifier	0.142299	0.050184	0.000416774	1	10	82300588	Body-opensea	ENSG00000108219	TSPAN14	81619	-0.483269	9.8912e-07	-0.467922	5.13544e-05
LUAD	ENSG00000108679_cg04927537	-0.427844	-0.401443	4.1634e-06	0.000944278	overlap	cg04927537	femaleAmplifier	-0.155176	-0.0537018	0.00854699	1	17	76976091	TSS200-opensea	ENSG00000108679	LGALS3BP	3959	0.871453	5.83015e-07	0.855931	1.29356e-05
LUAD	ENSG00000110799_cg00216961	0.354775	0.25712	0.0122466	1	fSpecific	cg00216961	femaleAmplifier	-0.301582	-0.2063	2.04333e-16	9.02745e-05	12	6054731	Body-opensea	ENSG00000110799	VWF	7450	-1.42868	1.30596e-07	-1.24038	0.00189524
LUAD	ENSG00000124256_cg17306740	-0.467422	-0.49899	0	0	overlap	cg17306740	femaleAmplifier	-0.16723	-0.103507	9.54099e-08	0.297412	20	56195434	1stExon-opensea	ENSG00000124256	ZBP1	81030	0.815124	0.00977142	0.669915	1
LUAD	ENSG00000130307_cg24766041	-0.381877	-0.213735	0.000836058	1	fSpecific	cg24766041	femaleAmplifier	0.154092	0.107452	1.69073e-17	0.000447946	19	17375445	5'UTR-opensea	ENSG00000130307	USHBP1	83878	-1.97656	3.78789e-14	-1.92643	2.17613e-09
LUAD	ENSG00000132622_cg17858500	-0.433913	-0.45663	1.78894e-06	1.38388e-06	overlap	cg17858500	femaleAmplifier	0.202259	0.154714	9.98611e-39	2.21953e-17	20	3734725	Body-shore	ENSG00000132622	HSPA12B	116835	-2.52974	1.9651e-14	-2.27705	6.30309e-10
LUAD	ENSG00000133800_cg12407978	-0.39252	-0.293755	0.000271003	1	fSpecific	cg12407978	femaleAmplifier	0.174663	0.125457	1.20923e-18	6.86949e-05	11	10590159	1stExon-opensea	ENSG00000133800	LYVE1	10894	-3.15131	8.14542e-13	-2.7822	3.10552e-09
LUAD	ENSG00000135083_cg26824709	-0.423635	-0.385572	7.22498e-06	0.00435756	overlap	cg26824709	femaleAmplifier	-0.195245	-0.100346	5.80858e-09	1	5	159740383	TSS1500-shore	ENSG00000135083	CCNJL	79616	1.0933	1.75924e-05	0.711678	1
LUAD	ENSG00000135111_cg24461304	0.373675	0.531364	0.00193454	0	overlap	cg24461304	femaleAmplifier	-0.218991	-0.0867875	8.8814e-05	1	12	115104460	IGR-shore	ENSG00000135111	TBX3	6926	-1.65866	2.62693e-11	-1.37054	2.81612e-05
LUAD	ENSG00000137831_cg12642431	-0.404183	-0.35448	7.45634e-05	0.0694326	fSpecific	cg12642431	femaleAmplifier	0.132334	0.0507909	0.0482131	1	15	70994672	Body-opensea	ENSG00000137831	UACA	55075	-1.16298	1.97259e-10	-0.970859	0.000763502
LUAD	ENSG00000143321_cg15124109	-0.35191	-0.263342	0.0160372	1	fSpecific	cg15124109	femaleAmplifier	-0.121539	-0.0738536	8.65357e-26	6.58235e-10	1	156711332	TSS1500-shore	ENSG00000143321	HDGF	3068	0.384956	0.0022103	0.409487	0.0550443
LUAD	ENSG00000163132_cg23453372	0.344374	0.352895	0.0321944	0.0793598	fSpecific	cg23453372	femaleAmplifier	-0.199891	-0.0954362	8.92569e-05	1	4	4866619	IGR-island	ENSG00000163132	MSX1	4487	-1.35336	1.93469e-06	-1.62172	0.000261188
LUAD	ENSG00000163132_cg26789064	0.341621	0.335552	0.0413456	0.327468	fSpecific	cg26789064	femaleAmplifier	-0.219192	-0.0686268	0.018413	1	4	4866130	IGR-shore	ENSG00000163132	MSX1	4487	-1.35336	1.93469e-06	-1.62172	0.000261188
LUAD	ENSG00000163132_cg03456560	0.506688	0.462169	0	4.64223e-07	overlap	cg03456560	femaleAmplifier	-0.195759	-0.099551	0.0110659	1	4	4866192	IGR-shore	ENSG00000163132	MSX1	4487	-1.35336	1.93469e-06	-1.62172	0.000261188
LUAD	ENSG00000163132_cg12558966	0.384186	0.293361	0.000657198	1	fSpecific	cg12558966	femaleAmplifier	-0.190434	-0.0910708	0.000529444	1	4	4866946	IGR-shore	ENSG00000163132	MSX1	4487	-1.35336	1.93469e-06	-1.62172	0.000261188
LUAD	ENSG00000167641_cg20961591	0.372097	0.254046	0.00226706	1	fSpecific	cg20961591	femaleAmplifier	-0.0782056	-0.0531028	9.24506e-20	0.000105919	19	38755588	1stExon-island	ENSG00000167641	PPP1R14A	94274	-1.78955	5.90719e-11	-1.96812	9.0689e-08
LUAD	ENSG00000173706_cg01378515	-0.367917	-0.387849	0.00343732	0.00351733	overlap	cg01378515	femaleAmplifier	0.175495	0.123594	2.00528e-14	5.26545e-08	3	124773106	Body-shore	ENSG00000173706	HEG1	57493	-1.95369	4.35068e-14	-1.52825	2.30081e-08
LUAD	ENSG00000179855_cg25597797	0.38741	0.319841	0.000468085	1	fSpecific	cg25597797	femaleAmplifier	-0.167649	-0.0827499	0.0113014	1	19	3589762	Body-shelf	ENSG00000179855	GIPC3	126326	-1.32915	8.06058e-06	-0.982079	0.00125763
LUAD	ENSG00000186994_cg09934056	0.5051	0.43858	0	1.70188e-05	overlap	cg09934056	femaleAmplifier	-0.298495	-0.235109	1.89324e-36	6.61451e-14	19	8400203	Body-island	ENSG00000186994	KANK3	256949	-2.41316	1.37071e-14	-2.22175	6.81525e-11
LUAD	ENSG00000196684_cg15668490	-0.447464	-0.36545	1.6377e-07	0.0270013	overlap	cg15668490	femaleAmplifier	-0.11367	-0.0485534	0.0324967	1	19	16254489	5'UTR-opensea	ENSG00000196684	HSH2D	84941	1.55357	6.7321e-13	1.29431	2.11485e-07
LUAD	ENSG00000211445_cg23321140	-0.486614	-0.532023	0	0	overlap	cg23321140	femaleAmplifier	0.181183	0.0874001	0.00329667	1	5	150410007	3'UTR-opensea	ENSG00000211445	GPX3	2878	-2.28437	1.61102e-12	-1.80689	1.29056e-07
LUAD	ENSG00000249751_cg08331427	-0.42079	-0.41085	1.03639e-05	0.000365359	overlap	cg08331427	femaleAmplifier	0.105265	0.0864485	8.63922e-44	9.7192e-27	5	138842004	Body-opensea	ENSG00000249751	ECSCR	641700	-1.78558	4.85919e-12	-1.71689	9.26997e-10	P
COAD	ENSG00000106785_cg01765174	-0.489217	-0.504029	0.00483689	1.39042e-05	overlap	cg01765174	femaleAmplifier	0.159407	0.078669	0.0470195	1	9	100880960	Body-shore	ENSG00000106785	TRIM14	9830	-0.50702	0.0125891	-0.257908	1
COAD	ENSG00000106789_cg01765174	-0.503828	-0.362328	0.00146211	1	fSpecific	cg01765174	femaleAmplifier	0.159407	0.078669	0.0470195	1	9	100880960	Body-shore	ENSG00000106789	CORO2A	7464	-1.2178	2.12379e-06	-1.03786	8.00411e-05
COAD	ENSG00000120899_cg12743031	-0.617702	-0.547765	0	0	overlap	cg12743031	femaleAmplifier	0.164619	0.0846815	0.00330152	1	8	27219512	5'UTR-opensea	ENSG00000120899	PTK2B	2185	-1.01767	3.00974e-05	-0.888413	0.000209226	P
COAD	ENSG00000127884_cg19115690	-0.475416	-0.381676	0.0138859	0.649585	fSpecific	cg19115690	femaleAmplifier	0.258823	0.129336	0.00251557	1	10	135178849	Body-opensea	ENSG00000127884	ECHS1	1892	-0.635686	4.28731e-06	-0.603206	0.000127242
COAD	ENSG00000149256_cg11426603	0.484172	0.437834	0.00716212	0.010494	overlap	cg11426603	femaleAmplifier	0.115731	0.0646947	0.000798476	1	11	78426876	Body-opensea	ENSG00000149256	TENM4	26011	2.90051	2.41557e-08	2.54322	3.07813e-08
COAD	ENSG00000166959_cg20446143	-0.4589	-0.350918	0.0457861	1	fSpecific	cg20446143	femaleAmplifier	0.239352	0.142219	3.7967e-05	1	11	60466740	TSS1500-opensea	ENSG00000166959	MS4A8	83661	-1.71371	0.00405746	-1.15047	1
COAD	ENSG00000213626_cg17250262	0.482138	0.438286	0.00837003	0.0101204	overlap	cg17250262	femaleAmplifier	0.159528	0.06118	0.0258571	1	2	30457110	Body-shore	ENSG00000213626	LBH	81606	1.68315	1.01945e-08	1.21764	4.70893e-07
KIRC	ENSG00000106070_cg25748357	-0.592968	-0.412335	0	0.000358882	overlap	cg25748357	femaleAmplifier	-0.114465	-0.0732865	1.01165e-09	1.76597e-07	7	50799978	5'UTR-opensea	ENSG00000106070	GRB10	2887	1.67711	1.73797e-06	1.35318	2.81628e-17
KIRC	ENSG00000133317_cg13439241	-0.554144	-0.62846	0.0010846	0	overlap	cg13439241	femaleAmplifier	-0.369303	-0.24978	3.80052e-09	1.33462e-11	11	63273507	TSS200-opensea	ENSG00000133317	LGALS12	85329	2.56168	0.0133098	3.35261	4.90657e-12
KIRC	ENSG00000176387_cg02734600	-0.51877	-0.304444	0.0172624	1	fSpecific	cg02734600	femaleAmplifier	0.246654	0.190968	3.29662e-24	7.08553e-24	16	67467751	Body-shelf	ENSG00000176387	HSD11B2	3291	-4.05046	5.80277e-07	-4.43568	1.33193e-23
KIRC	ENSG00000198053_cg14613594	-0.606595	-0.463802	0	3.93821e-07	overlap	cg14613594	femaleAmplifier	-0.33677	-0.224513	6.06064e-14	2.96544e-14	20	1878646	Body-shelf	ENSG00000198053	SIRPA	140885	1.45454	4.2589e-07	1.60113	7.05786e-21
THCA	ENSG00000187513_cg02480666	-0.469318	-0.344489	0	1	fSpecific	cg02480666	femaleAmplifier	-0.185129	-0.0971746	4.22579e-10	1	1	35259746	5'UTR-shore	ENSG00000187513	GJA4	2701	1.4439	8.97487e-14	1.91819	0.000300757
THCA	ENSG00000188910_cg02480666	-0.43187	-0.389984	0	1	fSpecific	cg02480666	femaleAmplifier	-0.185129	-0.0971746	4.22579e-10	1	1	35259746	5'UTR-shore	ENSG00000188910	GJB3	2707	2.07689	8.13061e-09	2.60556	0.000897614

## Sheet: male 
Cancer	eQTM information						Methylation information									Expression information							Druggable gene
	eQTM	Corr.female	Corr.male	Cor.bonf.female	Cor.bonf.male	Label	CpG	Group	ES.female	ES.male	Bonf.female	Bonf.male	CHR	MAPINFO	feat.cgi	Ename	eGene	entrez	ES.female	Bonf.female	ES.male	Bonf.male
LIHC	ENSG00000099769_cg01747665	-0.634151	-0.639483	0	0	overlap	cg01747665	maleAmplifier	0.0815952	0.205126	1	5.52443e-05	16	1843424	Body-shore	ENSG00000099769	IGFALS	3483	-2.124	1	-2.95281	1.69924e-05
LIHC	ENSG00000120057_cg08849635	-0.432221	-0.369174	0.257481	0.000512882	mSpecific	cg08849635	maleAmplifier	0.0557374	0.153798	1	0.00368785	10	99532386	TSS1500-shore	ENSG00000120057	SFRP5	6425	-6.23544	3.59756e-07	-6.72536	4.26842e-11
LIHC	ENSG00000120057_cg06692050	-0.376252	-0.396825	1	2.12111e-05	mSpecific	cg06692050	maleAmplifier	0.0625478	0.214975	1	3.37347e-06	10	99532398	TSS1500-shore	ENSG00000120057	SFRP5	6425	-6.23544	3.59756e-07	-6.72536	4.26842e-11
LIHC	ENSG00000133477_cg13714749	-0.431773	-0.349583	0.265059	0.00404774	mSpecific	cg13714749	maleAmplifier	0.0225388	0.197487	1	1.13719e-07	22	40391489	1stExon-island	ENSG00000133477	FAM83F	113828	-3.62297	0.00017014	-5.23882	1.33934e-10
LIHC	ENSG00000162688_cg10772169	-0.401776	-0.344081	1	0.00705387	mSpecific	cg10772169	maleAmplifier	0.100907	0.195939	1	7.42302e-10	1	100315213	TSS1500-shore	ENSG00000162688	AGL	178	-0.823449	0.0151489	-0.77479	0.000108528
LIHC	ENSG00000174358_cg09837037	-0.439926	-0.450888	0.155479	0	mSpecific	cg09837037	maleAmplifier	0.0736028	0.268614	1	5.25902e-06	5	1201602	TSS200-island	ENSG00000174358	SLC6A19	340024	-6.87453	1.50871e-06	-6.95565	2.54524e-11
LIHC	ENSG00000178826_cg15652212	-0.483957	-0.56856	0.00677772	0	overlap	cg15652212	maleAmplifier	0.0725876	0.198112	1	0.001789	7	142981776	TSS1500-shelf	ENSG00000178826	TMEM139	135932	-0.456941	1	-1.39255	0.0369744
LIHC	ENSG00000178826_cg22531018	-0.488633	-0.569056	0.00471356	0	overlap	cg22531018	maleAmplifier	0.0907817	0.230342	1	0.000416174	7	142981779	TSS1500-shelf	ENSG00000178826	TMEM139	135932	-0.456941	1	-1.39255	0.0369744
LIHC	ENSG00000178826_cg21852589	-0.510335	-0.576225	0.000767922	0	overlap	cg21852589	maleAmplifier	0.10125	0.250726	1	0.000509252	7	142981689	TSS1500-shelf	ENSG00000178826	TMEM139	135932	-0.456941	1	-1.39255	0.0369744
LIHC	ENSG00000180921_cg05626536	-0.170661	-0.352357	1	0.00304679	mSpecific	cg05626536	maleAmplifier	-0.148263	-0.251964	1	1.35898e-11	8	144801088	Body-island	ENSG00000180921	FAM83H	286077	0.424532	1	0.765775	0.00239629
LIHC	ENSG00000181135_cg05626536	-0.109997	-0.391164	1	4.19877e-05	mSpecific	cg05626536	maleAmplifier	-0.148263	-0.251964	1	1.35898e-11	8	144801088	Body-island	ENSG00000181135	ZNF707	286075	0.0902776	1	0.509825	0.00072312
LIHC	ENSG00000196407_cg04296699	-0.403011	-0.501761	1	0	mSpecific	cg04296699	maleAmplifier	-0.0524898	-0.255123	1	2.29618e-05	1	151810904	Body-island	ENSG00000196407	THEM5	284486	0.86845	0.210053	1.8365	1.23307e-08
LIHC	ENSG00000196407_cg05021743	-0.379465	-0.504134	1	0	mSpecific	cg05021743	maleAmplifier	-0.0340511	-0.22001	1	0.00279522	1	151810893	Body-island	ENSG00000196407	THEM5	284486	0.86845	0.210053	1.8365	1.23307e-08
LIHC	ENSG00000196407_cg10781408	-0.409481	-0.521455	1	0	mSpecific	cg10781408	maleAmplifier	-0.0336277	-0.244636	1	0.000426326	1	151810899	Body-island	ENSG00000196407	THEM5	284486	0.86845	0.210053	1.8365	1.23307e-08
LIHC	ENSG00000196407_cg15015892	-0.378323	-0.521229	1	0	mSpecific	cg15015892	maleAmplifier	-0.0414466	-0.227857	1	0.00448993	1	151810887	Body-island	ENSG00000196407	THEM5	284486	0.86845	0.210053	1.8365	1.23307e-08
LUAD	ENSG00000000003_cg18727700	-0.240131	-0.359266	1	0.0461754	mSpecific	cg18727700	maleAmplifier	-0.145869	-0.284084	1	0.0105844	X	99898930	TSS1500-opensea	ENSG00000000003	TSPAN6	7105	1.05614	8.90311e-07	1.36507	4.5769e-07
LUAD	ENSG00000074660_cg00869668	-0.495224	-0.531824	0	0	overlap	cg00869668	maleAmplifier	0.0580961	0.14816	1	4.72492e-05	17	1549012	5'UTR-shore	ENSG00000074660	SCARF1	8578	-0.637092	0.00373191	-0.564376	0.0231045
LUAD	ENSG00000074660_cg12485428	-0.521993	-0.5138	0	0	overlap	cg12485428	maleAmplifier	0.0970266	0.205253	1	1.47664e-08	17	1549098	TSS200-shore	ENSG00000074660	SCARF1	8578	-0.637092	0.00373191	-0.564376	0.0231045
LUAD	ENSG00000082458_cg13781574	-0.209336	-0.459337	1	8.47577e-07	mSpecific	cg13781574	maleAmplifier	-0.00562138	-0.236635	1	6.81769e-10	X	69675294	Body-island	ENSG00000082458	DLG3	1741	0.74553	1.15381e-09	0.814628	2.59436e-07
LUAD	ENSG00000102359_cg18727700	-0.332442	-0.495345	0.0936473	0	mSpecific	cg18727700	maleAmplifier	-0.145869	-0.284084	1	0.0105844	X	99898930	TSS1500-opensea	ENSG00000102359	SRPX2	27286	1.28027	3.433e-06	1.14966	0.00121676
LUAD	ENSG00000115641_cg25332717	-0.273997	-0.478357	1	0	mSpecific	cg25332717	maleAmplifier	-0.100279	-0.182506	1	0.000251292	2	106020669	5'UTR-opensea	ENSG00000115641	FHL2	2274	1.71183	1.00002e-07	1.94845	3.9738e-07
LUAD	ENSG00000131653_cg04987122	-0.244383	-0.468147	1	3.30683e-08	mSpecific	cg04987122	maleAmplifier	-0.13598	-0.298087	1	0.0235127	16	2213440	5'UTR-shore	ENSG00000131653	TRAF7	84231	0.552779	2.88605e-08	0.585645	1.42411e-06
LUAD	ENSG00000131653_cg02925248	-0.289976	-0.512476	1	0	mSpecific	cg02925248	maleAmplifier	-0.146149	-0.288895	1	0.00682456	16	2213749	5'UTR-shore	ENSG00000131653	TRAF7	84231	0.552779	2.88605e-08	0.585645	1.42411e-06
LUAD	ENSG00000157483_cg02920604	-0.098883	-0.385773	1	0.00427627	mSpecific	cg02920604	maleAmplifier	-0.195265	-0.323078	1	1.65209e-05	15	59484170	Body-opensea	ENSG00000157483	MYO1E	4643	0.435046	0.234524	0.629994	0.0101757
LUAD	ENSG00000162522_cg00423597	-0.254334	-0.37655	1	0.0100227	mSpecific	cg00423597	maleAmplifier	-0.0802845	-0.207033	1	0.0308552	1	33235531	Body-island	ENSG00000162522	KIAA1522	57648	0.783724	6.28975e-07	0.606289	0.00040829
LUSC	ENSG00000052795_cg18095824	-0.221105	-0.359255	1	0.0010155	mSpecific	cg18095824	maleAmplifier	0.125563	0.261691	1	1.2319e-12	4	159704293	Body-opensea	ENSG00000052795	FNIP2	57600	-1.28617	0.00265314	-1.33867	8.81542e-15
LUSC	ENSG00000069122_cg13975362	-0.519858	-0.401998	0.107175	6.5944e-06	mSpecific	cg13975362	maleAmplifier	0.155271	0.224177	0.0143851	5.80997e-20	6	46890512	TSS1500-opensea	ENSG00000069122	ADGRF5	221395	-2.58037	0.000485642	-2.76213	5.16699e-19
LUSC	ENSG00000101911_cg26704637	-0.204198	-0.329014	1	0.0227198	mSpecific	cg26704637	maleAmplifier	-0.0819193	-0.205818	1	5.69943e-15	X	12810444	Body-shore	ENSG00000101911	PRPS2	5634	0.938026	0.128227	0.71271	1.94296e-11
LUSC	ENSG00000109906_cg12026858	-0.152686	-0.32122	1	0.0480847	mSpecific	cg12026858	maleAmplifier	0.0622378	0.188538	1	0.00124568	11	114067446	Body-shelf	ENSG00000109906	ZBTB16	7704	-4.01111	0.17173	-3.26347	1.74284e-13
LUSC	ENSG00000111319_cg25670451	-0.576771	-0.463411	0.00204108	0	overlap	cg25670451	maleAmplifier	0.0563912	0.10706	1	7.93051e-07	12	6487677	TSS1500-opensea	ENSG00000111319	SCNN1A	6337	-0.783653	1	-1.01829	0.00366462
LUSC	ENSG00000111911_cg22067676	-0.250311	-0.347951	1	0.00337095	mSpecific	cg22067676	maleAmplifier	0.0663489	0.155508	1	0.000168505	6	126281331	Body-shelf	ENSG00000111911	HINT3	135114	-0.71348	0.00783602	-0.696564	2.88368e-14
LUSC	ENSG00000117318_cg18150584	-0.468412	-0.399836	1	8.7247e-06	mSpecific	cg18150584	maleAmplifier	0.108766	0.236977	1	1.34073e-05	1	23887816	TSS1500-shore	ENSG00000117318	ID3	3399	-0.844272	1	-0.981061	1.00351e-05
LUSC	ENSG00000119862_cg21945949	-0.245718	-0.321119	1	0.0485458	mSpecific	cg21945949	maleAmplifier	0.069018	0.145912	1	9.70513e-05	2	64683610	Body-shore	ENSG00000119862	LGALSL	29094	-1.80443	0.00205497	-1.90098	5.04985e-17
LUSC	ENSG00000121742_cg01446515	-0.446088	-0.514493	1	0	mSpecific	cg01446515	maleAmplifier	-0.063669	-0.224871	1	0.0193571	13	20805443	5'UTR-shore	ENSG00000121742	GJB6	10804	3.79539	0.21328	3.07747	1.4698e-10
LUSC	ENSG00000134020_cg21900589	-0.354653	-0.336562	1	0.0107789	mSpecific	cg21900589	maleAmplifier	0.034617	0.123974	1	0.00657887	8	22866294	Body-shore	ENSG00000134020	PEBP4	157310	-4.18744	0.00265314	-4.16312	7.46158e-15
LUSC	ENSG00000136153_cg19861914	-0.357912	-0.388325	1	3.66276e-05	mSpecific	cg19861914	maleAmplifier	0.0614586	0.19246	1	0.0146253	13	76334039	TSS1500-opensea	ENSG00000136153	LMO7	4008	-2.40432	0.000388146	-2.38962	8.11604e-18
LUSC	ENSG00000137857_cg23531257	-0.513356	-0.50758	0.158259	0	mSpecific	cg23531257	maleAmplifier	0.0960559	0.198192	1	6.94623e-05	15	45422553	5'UTR-shore	ENSG00000137857	DUOX1	53905	-2.32255	0.00188633	-2.38349	1.27869e-18
LUSC	ENSG00000140254_cg23531257	-0.531086	-0.475271	0.0536161	0	mSpecific	cg23531257	maleAmplifier	0.0960559	0.198192	1	6.94623e-05	15	45422553	5'UTR-shore	ENSG00000140254	DUOXA1	90527	-1.75674	0.00314216	-2.17188	1.38665e-16
LUSC	ENSG00000140526_cg23124613	-0.370309	-0.340371	1	0.00734404	mSpecific	cg23124613	maleAmplifier	0.0837031	0.170723	1	1.96832e-09	15	89731485	Body-opensea	ENSG00000140526	ABHD2	11057	-0.550386	1	-0.73075	0.00225321
LUSC	ENSG00000153904_cg20293609	-0.328707	-0.365626	1	0.000505602	mSpecific	cg20293609	maleAmplifier	0.0882703	0.177199	1	1.21787e-07	1	86048540	Body-shore	ENSG00000153904	DDAH1	23576	-1.50576	0.0414935	-1.66547	2.69294e-14
LUSC	ENSG00000158966_cg05120074	-0.384006	-0.365036	1	0.000539698	mSpecific	cg05120074	maleAmplifier	0.042391	0.155925	1	0.0197516	1	65030620	Body-opensea	ENSG00000158966	CACHD1	57685	-0.665125	1	-0.99411	1.43301e-06
LUSC	ENSG00000177119_cg12686055	-0.464872	-0.326132	1	0.0300484	mSpecific	cg12686055	maleAmplifier	0.0739687	0.199788	1	0.000549638	12	45628262	Body-opensea	ENSG00000177119	ANO6	196527	-0.64485	0.148461	-0.587472	1.21579e-06
LUSC	ENSG00000189221_cg06794323	-0.0336585	-0.391341	1	2.53525e-05	mSpecific	cg06794323	maleAmplifier	0.0762887	0.227553	1	1.438e-05	X	43518105	Body-shelf	ENSG00000189221	MAOA	4128	-2.18923	0.00127946	-2.06527	4.1085e-17
LUSC	ENSG00000189221_cg11390960	-0.291616	-0.624438	1	0	mSpecific	cg11390960	maleAmplifier	0.0706458	0.242675	1	0.0319959	X	43517029	Body-shore	ENSG00000189221	MAOA	4128	-2.18923	0.00127946	-2.06527	4.1085e-17
LUSC	ENSG00000204385_cg09298971	-0.54852	-0.465131	0.0172298	0	overlap	cg09298971	maleAmplifier	0.047772	0.101297	1	0.000180595	6	31846249	Body-opensea	ENSG00000204385	SLC44A4	80736	-1.36384	1	-1.78283	1.70383e-08
COAD	ENSG00000074800_cg06972019	-0.390679	-0.51956	1	0	mSpecific	cg06972019	maleAmplifier	-0.179225	-0.356963	1	1.57225e-06	1	8937448	5'UTR-shore	ENSG00000074800	ENO1	2023	0.724303	0.000428614	0.663762	0.0292095
COAD	ENSG00000074800_cg13432294	-0.332713	-0.479842	1	0.00026089	mSpecific	cg13432294	maleAmplifier	-0.020134	-0.117055	1	0.00502963	1	8937640	5'UTR-shore	ENSG00000074800	ENO1	2023	0.724303	0.000428614	0.663762	0.0292095
COAD	ENSG00000108509_cg19427746	-0.376104	-0.431574	1	0.0172569	mSpecific	cg19427746	maleAmplifier	0.0763363	0.160436	1	0.0346801	17	4889932	5'UTR-shore	ENSG00000108509	CAMTA2	23125	-0.622291	6.22635e-05	-0.67014	0.0089124
COAD	ENSG00000111331_cg12560128	-0.261112	-0.420215	1	0.0414689	mSpecific	cg12560128	maleAmplifier	-0.080737	-0.264357	1	0.00197406	12	113416061	TSS1500-opensea	ENSG00000111331	OAS3	4940	0.970643	0.167119	1.3794	6.63297e-06
COAD	ENSG00000111335_cg12560128	-0.331171	-0.486611	1	0.00013015	mSpecific	cg12560128	maleAmplifier	-0.080737	-0.264357	1	0.00197406	12	113416061	TSS1500-opensea	ENSG00000111335	OAS2	4939	1.67281	0.000860584	1.89183	2.43004e-06
COAD	ENSG00000164850_cg03595161	-0.297272	-0.49334	1	6.11969e-05	mSpecific	cg03595161	maleAmplifier	0.0744745	0.153031	1	0.00516936	7	1127767	5'UTR-shore	ENSG00000164850	GPER1	2852	-2.25795	4.43589e-05	-2.0889	0.000171623
COAD	ENSG00000167705_cg05548425	-0.421339	-0.437578	0.552997	0.0107121	mSpecific	cg05548425	maleAmplifier	0.13843	0.242637	1	6.40344e-06	17	1553415	TSS200-shore	ENSG00000167705	RILP	83547	-1.69164	4.11309e-08	-1.44235	2.14949e-07
COAD	ENSG00000173320_cg00404923	-0.336657	-0.445048	1	0.0058365	mSpecific	cg00404923	maleAmplifier	0.20743	0.304246	0.00157032	1.67225e-09	4	184882211	Body-opensea	ENSG00000173320	STOX2	56977	-1.30196	0.00204671	-1.42387	0.000724582
COAD	ENSG00000175662_cg04324276	-0.379134	-0.463146	1	0.00124325	mSpecific	cg04324276	maleAmplifier	0.0305555	0.117479	1	1.05813e-05	17	17817462	Body-opensea	ENSG00000175662	TOM1L2	146691	-0.850828	3.536e-06	-0.815879	0.000457143
COAD	ENSG00000189221_cg06794323	-0.431472	-0.62999	0.290355	0	mSpecific	cg06794323	maleAmplifier	0.173315	0.373032	1	6.11819e-05	X	43518105	Body-shelf	ENSG00000189221	MAOA	4128	-1.80085	6.78599e-08	-1.82061	1.86294e-06
COAD	ENSG00000196388_cg19427746	-0.194034	-0.42597	1	0.0267037	mSpecific	cg19427746	maleAmplifier	0.0763363	0.160436	1	0.0346801	17	4889932	5'UTR-shore	ENSG00000196388	INCA1	388324	-0.759417	0.00448129	-0.842626	0.000543731
COAD	ENSG00000204219_cg00463859	-0.430734	-0.449706	0.304495	0.00396315	mSpecific	cg00463859	maleAmplifier	0.117321	0.192063	1	1.33337e-08	1	23750101	Body-shore	ENSG00000204219	TCEA3	6920	-1.59648	2.17913e-07	-1.46538	4.49013e-06
KIRC	ENSG00000044446_cg04985372	-0.182249	-0.366349	1	0.0279575	mSpecific	cg04985372	maleAmplifier	-0.0349814	-0.115586	1	0.000801652	X	18907124	TSS1500-opensea	ENSG00000044446	PHKA2	5256	2.17134	8.52364e-08	2.27754	1.26311e-21
KIRC	ENSG00000073060_cg22775642	-0.354756	-0.377901	1	0.00997773	mSpecific	cg22775642	maleAmplifier	-0.137237	-0.199769	0.0445899	6.52623e-28	12	125332183	Body-opensea	ENSG00000073060	SCARB1	949	3.96997	2.40462e-08	4.36375	7.71848e-23
KIRC	ENSG00000099250_cg27270412	-0.499228	-0.361194	0.0639587	0.0437287	mSpecific	cg27270412	maleAmplifier	-0.0483132	-0.140215	1	0.00808076	10	33622332	Body-shore	ENSG00000099250	NRP1	8829	1.51268	0.00421968	1.36857	1.39384e-14
KIRC	ENSG00000105971_cg05166801	-0.385064	-0.536088	1	0	mSpecific	cg05166801	maleAmplifier	-0.0122615	-0.135186	1	0.0407289	7	116143459	Body-shelf	ENSG00000105971	CAV2	858	2.23099	2.84025e-07	2.24117	7.71848e-23
KIRC	ENSG00000106004_cg27313941	-0.185959	-0.365412	1	0.0303431	mSpecific	cg27313941	maleAmplifier	0.114816	0.181905	0.0332818	3.3476e-25	7	27186554	Body-shore	ENSG00000106004	HOXA5	3202	-0.931673	1	-0.610641	1.52436e-07
KIRC	ENSG00000106004_cg00809969	-0.301502	-0.498417	1	0	mSpecific	cg00809969	maleAmplifier	0.0328753	0.195337	1	8.08264e-10	7	27181067	3'UTR-shore	ENSG00000106004	HOXA5	3202	-0.931673	1	-0.610641	1.52436e-07
KIRC	ENSG00000106004_cg08143349	-0.279653	-0.361721	1	0.0417883	mSpecific	cg08143349	maleAmplifier	0.0136825	0.11406	1	3.04405e-05	7	27180888	IGR-shore	ENSG00000106004	HOXA5	3202	-0.931673	1	-0.610641	1.52436e-07
KIRC	ENSG00000107819_cg15428620	-0.477899	-0.543153	0.243059	0	mSpecific	cg15428620	maleAmplifier	-0.113197	-0.188531	1	2.2148e-14	10	102792835	Body-shore	ENSG00000107819	SFXN3	81855	1.30443	4.2589e-07	1.1164	1.96924e-21
KIRC	ENSG00000109854_cg21617357	-0.268424	-0.376325	1	0.0115105	mSpecific	cg21617357	maleAmplifier	-0.0633083	-0.149315	1	1.62559e-06	11	20389052	Body-shelf	ENSG00000109854	HTATIP2	10553	0.94746	0.00121478	1.15758	1.33053e-19
KIRC	ENSG00000111252_cg20524636	-0.374943	-0.381472	1	0.00719758	mSpecific	cg20524636	maleAmplifier	-0.0405047	-0.0883242	1	0.0291929	12	111854869	5'UTR-shore	ENSG00000111252	SH2B3	10019	1.73222	3.28459e-05	1.43008	7.48691e-20	P
KIRC	ENSG00000111696_cg02344784	-0.344239	-0.373918	1	0.014297	mSpecific	cg02344784	maleAmplifier	-0.0297453	-0.110455	1	2.31452e-05	12	104178138	Body-opensea	ENSG00000111696	NT5DC3	51559	1.93691	0.000134086	2.26638	1.47618e-20
KIRC	ENSG00000112033_cg01101911	-0.562389	-0.503915	0.000464544	0	overlap	cg01101911	maleAmplifier	-0.0768816	-0.167174	1	3.63543e-09	6	35360715	5'UTR-opensea	ENSG00000112033	PPARD	5467	0.774467	0.000576712	0.70273	2.47911e-09
KIRC	ENSG00000113140_cg10505630	-0.430877	-0.460851	1	7.73828e-07	mSpecific	cg10505630	maleAmplifier	-0.0320131	-0.0885468	1	0.00134431	5	151051214	Body-opensea	ENSG00000113140	SPARC	6678	2.1042	1.96011e-06	1.55291	1.13833e-16
KIRC	ENSG00000122121_cg21120047	-0.413597	-0.421012	1	0.000144376	mSpecific	cg21120047	maleAmplifier	0.115602	0.198848	1	4.88798e-11	X	128872961	1stExon-opensea	ENSG00000122121	XPNPEP2	7512	-5.587	4.22596e-05	-7.29119	5.17632e-19
KIRC	ENSG00000122592_cg27313941	-0.2442	-0.411152	1	0.000405235	mSpecific	cg27313941	maleAmplifier	0.114816	0.181905	0.0332818	3.3476e-25	7	27186554	Body-shore	ENSG00000122592	HOXA7	3204	-1.41986	0.00104269	-1.74726	2.01462e-17
KIRC	ENSG00000123096_cg21544415	-0.234972	-0.369296	1	0.0215752	mSpecific	cg21544415	maleAmplifier	-0.0973091	-0.194051	1	1.9335e-12	12	26288686	IGR-opensea	ENSG00000123096	SSPN	8082	1.17025	0.0079063	1.38359	9.98537e-21
KIRC	ENSG00000126217_cg22495636	-0.523803	-0.418863	0.0121136	0.000181522	overlap	cg22495636	maleAmplifier	-0.0348971	-0.084957	1	0.0239746	13	113698951	Body-shelf	ENSG00000126217	MCF2L	23263	1.20845	1.57167e-05	1.03727	7.31977e-16
KIRC	ENSG00000128849_cg26222731	-0.278387	-0.390477	1	0.00310397	mSpecific	cg26222731	maleAmplifier	0.0458869	0.0955851	1	0.000311094	15	57695943	5'UTR-opensea	ENSG00000128849	CGNL1	84952	-2.79459	6.76826e-07	-2.58163	5.20759e-23
KIRC	ENSG00000147403_cg09202373	-0.0417696	-0.435211	1	2.96087e-05	mSpecific	cg09202373	maleAmplifier	-0.00999575	-0.0849358	1	0.011884	X	153640674	TSS1500-island	ENSG00000147403	RPL10	6134	0.740786	0.000102182	0.76254	1.66564e-18
KIRC	ENSG00000152684_cg16619991	-0.331901	-0.370995	1	0.018561	mSpecific	cg16619991	maleAmplifier	-0.102154	-0.151875	1	1.17119e-20	5	52096811	Body-shore	ENSG00000152684	PELO	53918	0.384862	0.0202372	0.459787	1.56974e-15
KIRC	ENSG00000164904_cg03409151	-0.400512	-0.373492	1	0.0148534	mSpecific	cg03409151	maleAmplifier	0.0372947	0.191625	1	0.00827946	5	125929671	Body-shore	ENSG00000164904	ALDH7A1	501	-0.462694	0.169742	-0.716268	2.27957e-14
KIRC	ENSG00000167105_cg25949363	-0.490215	-0.449752	0.113662	4.72401e-06	mSpecific	cg25949363	maleAmplifier	-0.0245314	-0.106341	1	0.00771208	17	48352008	Body-shore	ENSG00000167105	TMEM92	162461	3.75344	0.173379	4.36364	4.17942e-11
KIRC	ENSG00000171992_cg14600885	-0.537566	-0.444382	0.00437414	9.66573e-06	overlap	cg14600885	maleAmplifier	-0.0963977	-0.14946	1	1.85804e-19	5	150040280	TSS200-shelf	ENSG00000171992	SYNPO	11346	1.38016	0.0342476	1.10051	1.31108e-10
KIRC	ENSG00000178104_cg12633998	-0.495225	-0.438055	0.0827376	2.11447e-05	mSpecific	cg12633998	maleAmplifier	0.0166628	0.160187	1	1.06391e-05	1	144928806	Body-shelf	ENSG00000178104	PDE4DIP	9659	-1.18166	2.64403e-06	-0.912515	1.30748e-12
KIRC	ENSG00000182199_cg12639933	-0.539499	-0.401523	0.00376217	0.0010664	overlap	cg12639933	maleAmplifier	-0.118305	-0.190517	1	1.40439e-28	12	57626296	Body-shelf	ENSG00000182199	SHMT2	6472	1.90836	4.32859e-08	1.97899	1.53731e-23
KIRC	ENSG00000182379_cg12639933	-0.365149	-0.373687	1	0.0145967	mSpecific	cg12639933	maleAmplifier	-0.118305	-0.190517	1	1.40439e-28	12	57626296	Body-shelf	ENSG00000182379	NXPH4	11247	4.60223	1.61182e-07	4.2566	8.9857e-21
KIRC	ENSG00000183098_cg03110165	-0.445703	-0.383597	1	0.00591581	mSpecific	cg03110165	maleAmplifier	-0.0735709	-0.174476	1	3.3542e-11	13	93884312	Body-shelf	ENSG00000183098	GPC6	10082	0.860433	1	0.418209	0.00687858
KIRC	ENSG00000185633_cg12639933	-0.470549	-0.443658	0.377575	1.06019e-05	mSpecific	cg12639933	maleAmplifier	-0.118305	-0.190517	1	1.40439e-28	12	57626296	Body-shelf	ENSG00000185633	NDUFA4L2	56901	7.26571	1.77222e-07	7.18654	3.79296e-22
KIRC	ENSG00000185633_cg19535267	-0.586409	-0.474974	0	0	overlap	cg19535267	maleAmplifier	-0.037791	-0.11102	1	0.00167532	12	57625610	Body-shore	ENSG00000185633	NDUFA4L2	56901	7.26571	1.77222e-07	7.18654	3.79296e-22
KIRC	ENSG00000196639_cg17660833	-0.207672	-0.461009	1	7.49232e-07	mSpecific	cg17660833	maleAmplifier	-0.221781	-0.323173	0.203255	3.41039e-25	3	11267020	5'UTR-opensea	ENSG00000196639	HRH1	3269	1.01349	0.478258	1.25754	2.6267e-17
KIRC	ENSG00000204531_cg00184953	-0.174808	-0.394993	1	0.00201561	mSpecific	cg00184953	maleAmplifier	-0.202217	-0.303555	0.0662266	8.62273e-28	6	31146222	TSS1500-shelf	ENSG00000204531	POU5F1	5460	3.14159	3.5609e-08	3.03722	1.23557e-22	P
KIRC	ENSG00000204531_cg02077524	-0.292998	-0.375351	1	0.0125686	mSpecific	cg02077524	maleAmplifier	-0.0285559	-0.137634	1	0.00322924	6	31145335	Body-shelf	ENSG00000204531	POU5F1	5460	3.14159	3.5609e-08	3.03722	1.23557e-22	P
KIRC	ENSG00000204531_cg07907517	-0.350448	-0.380669	1	0.00774876	mSpecific	cg07907517	maleAmplifier	-0.128147	-0.229719	1	1.04682e-24	6	31145541	Body-shelf	ENSG00000204531	POU5F1	5460	3.14159	3.5609e-08	3.03722	1.23557e-22	P
KIRC	ENSG00000214510_cg01391299	-0.24256	-0.377593	1	0.0102605	mSpecific	cg01391299	maleAmplifier	-0.0984965	-0.146675	1	2.65802e-25	5	147648312	TSS200-opensea	ENSG00000214510	SPINK13	153218	2.76117	0.000561918	4.09893	1.2162e-17
KIRC	ENSG00000223865_cg11451043	-0.320445	-0.40988	1	0.000461487	mSpecific	cg11451043	maleAmplifier	-0.0761803	-0.16439	1	0.000671548	6	33041583	TSS1500-opensea	ENSG00000223865	HLA-DPB1	3115	1.543	1.02095e-05	1.90703	6.95202e-21
KIRC	ENSG00000255408_cg08288811	-0.382203	-0.426924	1	7.58878e-05	mSpecific	cg08288811	maleAmplifier	0.0881612	0.173893	1	1.82163e-20	5	140180926	Body-island	ENSG00000255408	PCDHA3	56145	-0.895911	1	-1.11837	7.70927e-08
KIRC	ENSG00000255408_cg11429969	-0.369628	-0.391115	1	0.00292128	mSpecific	cg11429969	maleAmplifier	0.0529055	0.125209	1	8.49462e-12	5	140180921	Body-island	ENSG00000255408	PCDHA3	56145	-0.895911	1	-1.11837	7.70927e-08
KIRP	ENSG00000010030_cg07856975	-0.41724	-0.582915	1	0	mSpecific	cg07856975	maleAmplifier	-0.0132748	-0.1416	1	0.0120315	6	36356162	TSS1500-shore	ENSG00000010030	ETV7	51513	1.62053	1	2.00162	7.11583e-09
KIRP	ENSG00000010671_cg00126698	-0.198409	-0.375389	1	0.0106043	mSpecific	cg00126698	maleAmplifier	-0.0267085	-0.0892527	1	2.79259e-11	X	100640503	5'UTR-opensea	ENSG00000010671	BTK	695	2.21723	0.0577075	2.85037	1.83842e-09	P
KIRP	ENSG00000011105_cg11958128	-0.443278	-0.399682	1	0.00105819	mSpecific	cg11958128	maleAmplifier	0.0623126	0.274592	1	0.000333712	12	3226445	5'UTR-opensea	ENSG00000011105	TSPAN9	10867	-0.797539	1	-0.929524	3.83031e-07
KIRP	ENSG00000015285_cg11654838	-0.305079	-0.422115	1	0.000103579	mSpecific	cg11654838	maleAmplifier	-0.0142958	-0.0994539	1	0.00318485	X	48541415	TSS1500-opensea	ENSG00000015285	WAS	7454	1.89393	0.0271545	2.11398	1.62629e-08
KIRP	ENSG00000015285_cg20394620	-0.319584	-0.431632	1	3.56553e-05	mSpecific	cg20394620	maleAmplifier	-0.0705757	-0.142326	1	7.25686e-10	X	48541924	TSS1500-opensea	ENSG00000015285	WAS	7454	1.89393	0.0271545	2.11398	1.62629e-08
KIRP	ENSG00000022267_cg13100667	-0.322354	-0.396369	1	0.00146583	mSpecific	cg13100667	maleAmplifier	-0.0908996	-0.219313	1	0.00873575	X	135279018	5'UTR-opensea	ENSG00000022267	FHL1	2273	1.08811	1	2.78702	5.95952e-07
KIRP	ENSG00000022267_cg21374587	-0.296366	-0.4195	1	0.000137468	mSpecific	cg21374587	maleAmplifier	-0.113794	-0.257164	1	1.02539e-07	X	135278952	5'UTR-opensea	ENSG00000022267	FHL1	2273	1.08811	1	2.78702	5.95952e-07
KIRP	ENSG00000042493_cg07245678	-0.332679	-0.38404	1	0.00477041	mSpecific	cg07245678	maleAmplifier	-0.100738	-0.208641	1	1.65214e-06	2	85641254	IGR-island	ENSG00000042493	CAPG	822	1.16695	1	1.14436	0.000185312
KIRP	ENSG00000065308_cg15807046	-0.29682	-0.374032	1	0.0119946	mSpecific	cg15807046	maleAmplifier	0.120954	0.169732	0.0756188	1.31715e-31	6	52438690	Body-shelf	ENSG00000065308	TRAM2	9697	-0.707049	1	-1.03667	5.83374e-08
KIRP	ENSG00000069122_cg13975362	-0.542192	-0.419562	1	0.000136565	mSpecific	cg13975362	maleAmplifier	0.0608114	0.1012	0.00627733	5.83904e-37	6	46890512	TSS1500-opensea	ENSG00000069122	ADGRF5	221395	-3.53634	0.0184729	-3.66166	6.48109e-10
KIRP	ENSG00000073737_cg02743878	-0.421672	-0.478219	1	0	mSpecific	cg02743878	maleAmplifier	-0.342327	-0.498881	1	1.32454e-25	2	169937094	TSS1500-opensea	ENSG00000073737	DHRS9	10170	2.28812	0.943795	3.10835	1.58635e-08
KIRP	ENSG00000076716_cg26953234	-0.250485	-0.489705	1	0	mSpecific	cg26953234	maleAmplifier	-0.0331183	-0.198049	1	0.00584715	X	132547142	Body-shore	ENSG00000076716	GPC4	2239	0.41012	1	1.03289	0.0115043
KIRP	ENSG00000081985_cg01356829	-0.257435	-0.622452	1	0	mSpecific	cg01356829	maleAmplifier	-0.228644	-0.412266	1	2.24966e-10	1	67772896	TSS200-shore	ENSG00000081985	IL12RB2	3595	1.10737	1	3.33958	0.0191397
KIRP	ENSG00000081985_cg06952660	-0.0604115	-0.523349	1	0	mSpecific	cg06952660	maleAmplifier	-0.103665	-0.27592	1	9.71021e-07	1	67773044	TSS200-shore	ENSG00000081985	IL12RB2	3595	1.10737	1	3.33958	0.0191397
KIRP	ENSG00000081985_cg00318756	-0.140591	-0.526103	1	0	mSpecific	cg00318756	maleAmplifier	-0.0687641	-0.187771	1	0.000247679	1	67773020	TSS200-shore	ENSG00000081985	IL12RB2	3595	1.10737	1	3.33958	0.0191397
KIRP	ENSG00000081985_cg19745415	-0.257788	-0.639619	1	0	mSpecific	cg19745415	maleAmplifier	-0.240284	-0.418994	1	5.10893e-09	1	67772986	TSS200-shore	ENSG00000081985	IL12RB2	3595	1.10737	1	3.33958	0.0191397
KIRP	ENSG00000089472_cg20557008	-0.35086	-0.386175	1	0.00390242	mSpecific	cg20557008	maleAmplifier	0.0630198	0.213127	1	1.17477e-12	X	65384237	1stExon-opensea	ENSG00000089472	HEPH	9843	-2.08203	1	-2.11916	5.83374e-08
KIRP	ENSG00000092621_cg14476101	-0.73005	-0.548968	0	0	overlap	cg14476101	maleAmplifier	0.125225	0.236665	1	5.07478e-14	1	120255992	Body-shore	ENSG00000092621	PHGDH	26227	-1.47606	1	-2.10951	4.80252e-08
KIRP	ENSG00000092621_cg04857033	-0.199013	-0.426169	1	6.62633e-05	mSpecific	cg04857033	maleAmplifier	0.236174	0.377177	1	6.50312e-25	1	120258412	Body-shelf	ENSG00000092621	PHGDH	26227	-1.47606	1	-2.10951	4.80252e-08
KIRP	ENSG00000101665_cg06203649	-0.472388	-0.409014	1	0.000413302	mSpecific	cg06203649	maleAmplifier	0.185412	0.309232	1	4.96107e-16	18	46447634	3'UTR-shore	ENSG00000101665	SMAD7	4092	-0.545438	1	-0.685	0.0320876
KIRP	ENSG00000106077_cg05221465	-0.239455	-0.358216	1	0.048458	mSpecific	cg05221465	maleAmplifier	-0.0136618	-0.0454962	1	0.00325234	7	73150861	3'UTR-shore	ENSG00000106077	ABHD11	83451	1.19434	1	1.65755	1.70121e-09
KIRP	ENSG00000106628_cg10873171	-0.471481	-0.495109	1	0	mSpecific	cg10873171	maleAmplifier	-0.218037	-0.319888	0.519541	2.9216e-27	7	44145333	Body-opensea	ENSG00000106628	POLD2	5425	0.83567	0.148755	0.776825	9.23248e-08
KIRP	ENSG00000106819_cg13872739	-0.282969	-0.36696	1	0.0225962	mSpecific	cg13872739	maleAmplifier	0.0296797	0.0542297	1	4.90529e-15	9	95246206	Body-opensea	ENSG00000106819	ASPN	54829	-2.23411	1	-2.14015	1.65643e-05
KIRP	ENSG00000107796_cg09990481	-0.474403	-0.461996	1	4.09282e-07	mSpecific	cg09990481	maleAmplifier	0.047668	0.0984183	1	3.3593e-19	10	90712684	TSS200-opensea	ENSG00000107796	ACTA2	59	-1.58989	1	-1.65122	4.04112e-05
KIRP	ENSG00000107796_cg19015961	-0.57095	-0.513505	0.90381	0	mSpecific	cg19015961	maleAmplifier	0.0427429	0.0713505	1	8.8641e-16	10	90712748	TSS200-opensea	ENSG00000107796	ACTA2	59	-1.58989	1	-1.65122	4.04112e-05
KIRP	ENSG00000107796_cg07216529	-0.482209	-0.446573	1	5.60381e-06	mSpecific	cg07216529	maleAmplifier	0.0259682	0.0407433	1	1.26476e-15	10	90712739	TSS200-opensea	ENSG00000107796	ACTA2	59	-1.58989	1	-1.65122	4.04112e-05
KIRP	ENSG00000108387_cg25885038	-0.38551	-0.372283	1	0.0140476	mSpecific	cg25885038	maleAmplifier	0.00887292	0.046651	1	8.00656e-10	17	56607967	Body-shore	ENSG00000108387	SEPT4	5414	-1.35297	0.943795	-1.56692	1.16093e-06
KIRP	ENSG00000108387_cg01806238	-0.330463	-0.410602	1	0.000350977	mSpecific	cg01806238	maleAmplifier	0.0680908	0.102735	0.00875894	4.61932e-28	17	56597682	3'UTR-shelf	ENSG00000108387	SEPT4	5414	-1.35297	0.943795	-1.56692	1.16093e-06
KIRP	ENSG00000108387_cg10575089	-0.399008	-0.420409	1	0.000124649	mSpecific	cg10575089	maleAmplifier	0.0460841	0.10384	1	1.48198e-10	17	56606542	Body-shelf	ENSG00000108387	SEPT4	5414	-1.35297	0.943795	-1.56692	1.16093e-06
KIRP	ENSG00000109854_cg21617357	-0.305684	-0.37057	1	0.0163845	mSpecific	cg21617357	maleAmplifier	-0.0695515	-0.216568	1	2.54977e-06	11	20389052	Body-shelf	ENSG00000109854	HTATIP2	10553	1.44396	1	1.51121	3.58528e-09
KIRP	ENSG00000110237_cg01800884	-0.518924	-0.370799	1	0.0160522	mSpecific	cg01800884	maleAmplifier	0.0304556	0.0691952	1	7.4365e-07	11	73075695	Body-shore	ENSG00000110237	ARHGEF17	9828	-0.90271	0.518976	-1.02446	3.87061e-09
KIRP	ENSG00000111077_cg09173325	-0.493692	-0.441277	1	1.1176e-05	mSpecific	cg09173325	maleAmplifier	0.083311	0.136903	0.16196	1.45257e-27	12	53458408	3'UTR-opensea	ENSG00000111077	TNS2	23371	-1.1176	0.138489	-1.59867	2.20227e-09
KIRP	ENSG00000111371_cg26018685	-0.470776	-0.509121	1	0	mSpecific	cg26018685	maleAmplifier	-0.0624995	-0.176931	1	1.74887e-05	12	46663660	TSS1500-shore	ENSG00000111371	SLC38A1	81539	0.680541	1	0.819074	2.64935e-05
KIRP	ENSG00000111644_cg25655096	-0.0883131	-0.406396	1	0.000539874	mSpecific	cg25655096	maleAmplifier	-0.00841715	-0.357706	1	1.34355e-06	12	6745292	1stExon-opensea	ENSG00000111644	ACRBP	84519	0.784296	1	2.34758	1.98341e-08
KIRP	ENSG00000111644_cg06588028	-0.378812	-0.479187	1	0	mSpecific	cg06588028	maleAmplifier	-0.121621	-0.406917	1	4.53047e-09	12	6745568	TSS1500-opensea	ENSG00000111644	ACRBP	84519	0.784296	1	2.34758	1.98341e-08
KIRP	ENSG00000111644_cg05924780	-0.343507	-0.436948	1	1.90486e-05	mSpecific	cg05924780	maleAmplifier	-0.138915	-0.355588	1	1.80318e-12	12	6745524	TSS1500-opensea	ENSG00000111644	ACRBP	84519	0.784296	1	2.34758	1.98341e-08
KIRP	ENSG00000111644_cg18951718	-0.166981	-0.396628	1	0.00142929	mSpecific	cg18951718	maleAmplifier	-0.0282018	-0.348774	1	1.02986e-07	12	6745343	TSS200-opensea	ENSG00000111644	ACRBP	84519	0.784296	1	2.34758	1.98341e-08
KIRP	ENSG00000111679_cg25719851	-0.565561	-0.49062	1	0	mSpecific	cg25719851	maleAmplifier	-0.108765	-0.176844	1	3.81774e-21	12	7055452	TSS1500-shore	ENSG00000111679	PTPN6	5777	0.980025	0.28034	1.15439	1.15256e-09	P
KIRP	ENSG00000111679_cg23974819	-0.448616	-0.415888	1	0.000202047	mSpecific	cg23974819	maleAmplifier	-0.0432242	-0.0639919	1	5.8056e-28	12	7055829	1stExon-shore	ENSG00000111679	PTPN6	5777	0.980025	0.28034	1.15439	1.15256e-09	P
KIRP	ENSG00000113389_cg01405685	-0.406814	-0.385629	1	0.00410886	mSpecific	cg01405685	maleAmplifier	0.0872355	0.143083	1	5.40976e-26	5	32691919	IGR-opensea	ENSG00000113389	NPR3	4883	-3.648	1	-2.29369	0.0299688
KIRP	ENSG00000113721_cg14051336	-0.41452	-0.448816	1	4.11248e-06	mSpecific	cg14051336	maleAmplifier	0.051592	0.09514	1	5.08813e-16	5	149515317	Body-shelf	ENSG00000113721	PDGFRB	5159	-1.98678	0.518976	-2.13787	5.04218e-08	P
KIRP	ENSG00000115252_cg15129265	-0.545214	-0.395418	1	0.00160854	mSpecific	cg15129265	maleAmplifier	0.0598228	0.141572	1	4.50734e-08	2	183292922	Body-opensea	ENSG00000115252	PDE1A	5136	-4.84546	1	-5.31857	8.79864e-08
KIRP	ENSG00000115306_cg08981537	-0.430284	-0.384981	1	0.00436704	mSpecific	cg08981537	maleAmplifier	0.117299	0.199323	0.116857	1.3068e-32	2	54858444	Body-shore	ENSG00000115306	SPTBN1	6711	-0.464273	1	-0.51325	0.046572
KIRP	ENSG00000115306_cg23092956	-0.486792	-0.381863	1	0.00584521	mSpecific	cg23092956	maleAmplifier	0.208176	0.345585	1	1.45924e-20	2	54846562	Body-opensea	ENSG00000115306	SPTBN1	6711	-0.464273	1	-0.51325	0.046572
KIRP	ENSG00000115461_cg22657632	-0.371459	-0.411648	1	0.000314954	mSpecific	cg22657632	maleAmplifier	0.0539157	0.102747	1	8.98868e-23	2	217545159	Body-opensea	ENSG00000115461	IGFBP5	3488	-4.04723	0.00985903	-4.05326	4.97982e-10
KIRP	ENSG00000122122_cg02200373	-0.380373	-0.435627	1	2.23168e-05	mSpecific	cg02200373	maleAmplifier	-0.120873	-0.193126	1	1.29549e-18	X	128913578	TSS1500-opensea	ENSG00000122122	SASH3	54440	1.63146	0.28034	2.5711	5.83374e-08
KIRP	ENSG00000124134_cg05203217	-0.468309	-0.508017	1	0	mSpecific	cg05203217	maleAmplifier	-0.0267218	-0.161871	1	0.0142336	20	43730072	TSS1500-shore	ENSG00000124134	KCNS1	3787	0.778218	1	2.70086	0.0270409
KIRP	ENSG00000124216_cg23100428	-0.36889	-0.384631	1	0.004513	mSpecific	cg23100428	maleAmplifier	0.031685	0.107575	1	8.10297e-19	20	48600203	Body-shore	ENSG00000124216	SNAI1	6615	-1.20739	1	-1.40863	5.3044e-05
KIRP	ENSG00000125730_cg11959387	-0.586361	-0.591909	0.425037	0	mSpecific	cg11959387	maleAmplifier	-0.0541188	-0.245841	1	0.00860105	19	6721027	TSS1500-opensea	ENSG00000125730	C3	718	4.00666	0.774745	4.43116	1.03845e-09
KIRP	ENSG00000125730_cg17612991	-0.600514	-0.621922	0.207082	0	mSpecific	cg17612991	maleAmplifier	-0.074035	-0.23728	1	0.00513183	19	6721016	TSS1500-opensea	ENSG00000125730	C3	718	4.00666	0.774745	4.43116	1.03845e-09
KIRP	ENSG00000125810_cg14928764	-0.583491	-0.3743	0.490264	0.0117065	mSpecific	cg14928764	maleAmplifier	0.0227794	0.0766093	1	1.74094e-11	20	23064608	Body-opensea	ENSG00000125810	CD93	22918	-1.46762	0.300459	-1.74909	1.11865e-08
KIRP	ENSG00000130052_cg15068728	-0.481554	-0.50628	1	0	mSpecific	cg15068728	maleAmplifier	0.0981711	0.283464	1	3.35669e-16	X	67913143	TSS1500-shore	ENSG00000130052	STARD8	9754	-1.44477	0.593653	-2.06465	7.19919e-10
KIRP	ENSG00000130147_cg24749866	-0.556899	-0.383411	1	0.00505942	mSpecific	cg24749866	maleAmplifier	0.15955	0.248656	1	1.37729e-36	2	235883655	5'UTR-opensea	ENSG00000130147	SH3BP4	23677	-1.42272	0.0368088	-2.28901	1.61539e-09
KIRP	ENSG00000130158_cg23058652	-0.451084	-0.358901	1	0.0456839	mSpecific	cg23058652	maleAmplifier	0.0409246	0.0920408	1	9.66665e-24	19	11319463	Body-island	ENSG00000130158	DOCK6	57572	-0.361726	1	-0.744834	3.71524e-05
KIRP	ENSG00000130985_cg19261513	-0.503211	-0.376446	1	0.00962943	mSpecific	cg19261513	maleAmplifier	0.110431	0.388942	1	2.91274e-40	X	47057322	5'UTR-shelf	ENSG00000130985	UBA1	7317	-0.357843	1	-0.64345	2.47757e-08
KIRP	ENSG00000131634_cg00078759	-0.648108	-0.511501	0.0140184	0	overlap	cg00078759	maleAmplifier	0.156733	0.220715	0.00170042	1.0904e-47	16	1600969	Body-shore	ENSG00000131634	TMEM204	79652	-2.27675	0.0427987	-2.51598	4.5098e-09
KIRP	ENSG00000131634_cg03059382	-0.579915	-0.486559	0.584842	0	mSpecific	cg03059382	maleAmplifier	0.0976549	0.16739	0.000401408	7.56003e-62	16	1602140	Body-shelf	ENSG00000131634	TMEM204	79652	-2.27675	0.0427987	-2.51598	4.5098e-09
KIRP	ENSG00000131634_cg08669954	-0.452192	-0.371827	1	0.0146363	mSpecific	cg08669954	maleAmplifier	0.0611728	0.116547	1	3.81859e-19	16	1582105	Body-shore	ENSG00000131634	TMEM204	79652	-2.27675	0.0427987	-2.51598	4.5098e-09
KIRP	ENSG00000131634_cg02307681	-0.671829	-0.436568	0.0017569	1.99387e-05	overlap	cg02307681	maleAmplifier	0.0584996	0.0861064	0.0654005	2.43628e-26	16	1589378	Body-shore	ENSG00000131634	TMEM204	79652	-2.27675	0.0427987	-2.51598	4.5098e-09
KIRP	ENSG00000131634_cg08880369	-0.568835	-0.487941	1	0	mSpecific	cg08880369	maleAmplifier	0.110778	0.153259	2.86736e-08	2.69292e-42	16	1589653	Body-shore	ENSG00000131634	TMEM204	79652	-2.27675	0.0427987	-2.51598	4.5098e-09
KIRP	ENSG00000131634_cg14470121	-0.661555	-0.442862	0.0052198	9.13539e-06	overlap	cg14470121	maleAmplifier	0.1021	0.140841	0.000748326	1.23461e-30	16	1587684	Body-island	ENSG00000131634	TMEM204	79652	-2.27675	0.0427987	-2.51598	4.5098e-09
KIRP	ENSG00000131634_cg04147875	-0.636222	-0.463133	0.0292976	3.03339e-07	overlap	cg04147875	maleAmplifier	0.0621589	0.122092	1	5.45216e-39	16	1587610	Body-shore	ENSG00000131634	TMEM204	79652	-2.27675	0.0427987	-2.51598	4.5098e-09
KIRP	ENSG00000131634_cg00799748	-0.585505	-0.474638	0.443574	0	mSpecific	cg00799748	maleAmplifier	0.0859098	0.109768	8.16997e-09	5.05968e-58	16	1611052	Body-opensea	ENSG00000131634	TMEM204	79652	-2.27675	0.0427987	-2.51598	4.5098e-09
KIRP	ENSG00000131634_cg07484727	-0.717912	-0.551305	0	0	overlap	cg07484727	maleAmplifier	0.145929	0.188265	2.85082e-06	5.53817e-45	16	1587309	Body-shore	ENSG00000131634	TMEM204	79652	-2.27675	0.0427987	-2.51598	4.5098e-09
KIRP	ENSG00000131634_cg00939684	-0.590592	-0.45772	0.343746	1.00623e-06	mSpecific	cg00939684	maleAmplifier	0.11372	0.161518	0.0571131	1.15706e-40	16	1599150	Body-island	ENSG00000131634	TMEM204	79652	-2.27675	0.0427987	-2.51598	4.5098e-09
KIRP	ENSG00000131634_cg04590303	-0.653597	-0.469791	0.00964146	0	overlap	cg04590303	maleAmplifier	0.117529	0.185816	1	2.25452e-40	16	1608810	Body-shelf	ENSG00000131634	TMEM204	79652	-2.27675	0.0427987	-2.51598	4.5098e-09
KIRP	ENSG00000131634_cg08006309	-0.523054	-0.500636	1	0	mSpecific	cg08006309	maleAmplifier	0.111587	0.170235	0.004413	4.83525e-43	16	1587810	Body-island	ENSG00000131634	TMEM204	79652	-2.27675	0.0427987	-2.51598	4.5098e-09
KIRP	ENSG00000131634_cg02102832	-0.74259	-0.562425	0	0	overlap	cg02102832	maleAmplifier	0.065829	0.116282	0.130662	2.86039e-51	16	1581834	Body-shore	ENSG00000131634	TMEM204	79652	-2.27675	0.0427987	-2.51598	4.5098e-09
KIRP	ENSG00000131634_cg09757087	-0.295963	-0.415856	1	0.000202731	mSpecific	cg09757087	maleAmplifier	0.0696011	0.123891	1	4.75807e-22	16	1585644	Body-shore	ENSG00000131634	TMEM204	79652	-2.27675	0.0427987	-2.51598	4.5098e-09
KIRP	ENSG00000131634_cg02730055	-0.605399	-0.50356	0.160579	0	mSpecific	cg02730055	maleAmplifier	0.0769716	0.146497	0.223913	2.18991e-52	16	1600926	Body-shore	ENSG00000131634	TMEM204	79652	-2.27675	0.0427987	-2.51598	4.5098e-09
KIRP	ENSG00000131634_cg16460816	-0.511067	-0.396743	1	0.00141329	mSpecific	cg16460816	maleAmplifier	0.0577398	0.0802214	0.000174553	3.08143e-40	16	1601884	Body-shelf	ENSG00000131634	TMEM204	79652	-2.27675	0.0427987	-2.51598	4.5098e-09
KIRP	ENSG00000131634_cg09534489	-0.421168	-0.437775	1	1.72325e-05	mSpecific	cg09534489	maleAmplifier	0.0123137	0.0486925	1	1.28212e-09	16	1609908	Body-opensea	ENSG00000131634	TMEM204	79652	-2.27675	0.0427987	-2.51598	4.5098e-09
KIRP	ENSG00000131634_cg07857040	-0.663217	-0.543658	0.00451621	0	overlap	cg07857040	maleAmplifier	0.177594	0.220913	8.0979e-10	1.73392e-57	16	1582219	Body-shore	ENSG00000131634	TMEM204	79652	-2.27675	0.0427987	-2.51598	4.5098e-09
KIRP	ENSG00000131634_cg07271253	-0.475208	-0.417368	1	0.000172686	mSpecific	cg07271253	maleAmplifier	0.0524313	0.0840773	1	2.97904e-26	16	1591768	Body-shore	ENSG00000131634	TMEM204	79652	-2.27675	0.0427987	-2.51598	4.5098e-09
KIRP	ENSG00000131634_cg10471113	-0.442925	-0.469317	1	0	mSpecific	cg10471113	maleAmplifier	0.100253	0.160206	0.000722107	2.49031e-36	16	1587842	Body-island	ENSG00000131634	TMEM204	79652	-2.27675	0.0427987	-2.51598	4.5098e-09
KIRP	ENSG00000131634_cg06599939	-0.618191	-0.466134	0.0811301	9.84285e-08	mSpecific	cg06599939	maleAmplifier	0.0591415	0.0856239	2.42286e-05	1.53035e-43	16	1590085	Body-shore	ENSG00000131634	TMEM204	79652	-2.27675	0.0427987	-2.51598	4.5098e-09
KIRP	ENSG00000131634_cg17706173	-0.65818	-0.504162	0.00686313	0	overlap	cg17706173	maleAmplifier	0.159177	0.205176	2.69282e-05	1.59274e-44	16	1582581	Body-shore	ENSG00000131634	TMEM204	79652	-2.27675	0.0427987	-2.51598	4.5098e-09
KIRP	ENSG00000132613_cg02030542	-0.244844	-0.367543	1	0.0214596	mSpecific	cg02030542	maleAmplifier	0.126242	0.186823	1	1.89655e-21	16	70722454	Body-shelf	ENSG00000132613	MTSS1L	92154	-0.56964	1	-0.958268	0.000123535
KIRP	ENSG00000133030_cg12370935	-0.445594	-0.419881	1	0.000131949	mSpecific	cg12370935	maleAmplifier	0.0289866	0.132927	1	4.67399e-10	17	16976475	Body-opensea	ENSG00000133030	MPRIP	23164	-0.537215	1	-0.650822	1.63913e-07
KIRP	ENSG00000133063_cg16311306	-0.366926	-0.359859	1	0.0420575	mSpecific	cg16311306	maleAmplifier	-0.200429	-0.41803	1	6.50795e-21	1	203244158	IGR-shore	ENSG00000133063	CHIT1	1118	4.80087	1	6.04034	1.436e-08
KIRP	ENSG00000134247_cg17907003	-0.505175	-0.474874	1	0	mSpecific	cg17907003	maleAmplifier	-0.233132	-0.464619	1	1.19962e-12	1	117533414	IGR-opensea	ENSG00000134247	PTGFRN	5738	2.07745	0.0396953	2.31674	2.77555e-09
KIRP	ENSG00000135077_cg17484237	-0.767168	-0.627248	0	0	overlap	cg17484237	maleAmplifier	-0.144604	-0.320282	1	1.14944e-07	5	156536107	5'UTR-opensea	ENSG00000135077	HAVCR2	84868	1.06727	1	2.12905	0.000311836	P
KIRP	ENSG00000135631_cg06863239	-0.298582	-0.398046	1	0.00124363	mSpecific	cg06863239	maleAmplifier	0.0218568	0.0418913	1	4.18424e-15	2	73301011	3'UTR-shore	ENSG00000135631	RAB11FIP5	26056	-0.804693	1	-0.767165	2.39638e-06
KIRP	ENSG00000136717_cg27405400	-0.527285	-0.460692	1	5.54793e-07	mSpecific	cg27405400	maleAmplifier	-0.143962	-0.328229	1	1.26989e-09	2	127839539	Body-opensea	ENSG00000136717	BIN1	274	0.453595	1	0.981175	0.00375414
KIRP	ENSG00000137801_cg03196766	-0.427967	-0.410616	1	0.000350468	mSpecific	cg03196766	maleAmplifier	0.0769786	0.133059	1	3.89573e-12	15	39888049	3'UTR-opensea	ENSG00000137801	THBS1	7057	-1.18779	1	-1.3987	5.76526e-05
KIRP	ENSG00000138316_cg00618155	-0.70653	-0.60384	0	0	overlap	cg00618155	maleAmplifier	-0.136125	-0.379698	1	4.48245e-11	10	72459629	Body-opensea	ENSG00000138316	ADAMTS14	140766	2.1435	1	3.19779	8.79864e-08
KIRP	ENSG00000139668_cg01870657	-0.254866	-0.36602	1	0.0245539	mSpecific	cg01870657	maleAmplifier	0.0456649	0.106913	1	1.31814e-29	13	52342952	3'UTR-opensea	ENSG00000139668	WDFY2	115825	-1.20897	0.0535705	-1.60355	8.87804e-10
KIRP	ENSG00000141527_cg07107756	-0.488857	-0.422504	1	9.92821e-05	mSpecific	cg07107756	maleAmplifier	-0.175417	-0.342305	1	2.59709e-11	17	78161227	TSS1500-shelf	ENSG00000141527	CARD14	79092	1.38368	1	1.70523	2.74164e-06
KIRP	ENSG00000142102_cg10261205	-0.668555	-0.609701	0.00265112	0	overlap	cg10261205	maleAmplifier	-0.0186751	-0.164202	1	0.00780533	11	289927	Body-island	ENSG00000142102	ATHL1	80162	1.60595	1	2.79978	1.93548e-07
KIRP	ENSG00000142599_cg13081009	-0.377905	-0.419702	1	0.000134515	mSpecific	cg13081009	maleAmplifier	0.281009	0.459637	1	7.51729e-20	1	8430745	5'UTR-opensea	ENSG00000142599	RERE	473	-0.486575	1	-0.38181	0.00503281
KIRP	ENSG00000143772_cg04503570	-0.437536	-0.369242	1	0.0184502	mSpecific	cg04503570	maleAmplifier	0.0574073	0.0862046	0.242331	6.11075e-32	1	226897117	Body-opensea	ENSG00000143772	ITPKB	3707	-1.7877	0.0341247	-1.73257	2.0384e-09
KIRP	ENSG00000144668_cg24717490	-0.379618	-0.420607	1	0.00012201	mSpecific	cg24717490	maleAmplifier	0.025788	0.0471465	1	1.25968e-12	3	37853862	Body-opensea	ENSG00000144668	ITGA9	3680	-1.68691	0.774745	-1.51771	7.08125e-08
KIRP	ENSG00000145107_cg05445326	-0.602528	-0.376775	0.186538	0.00934482	mSpecific	cg05445326	maleAmplifier	-0.296553	-0.463757	1	1.15575e-18	3	196065569	TSS1500-opensea	ENSG00000145107	TM4SF19	116211	2.99074	0.774745	2.86763	1.80254e-07
KIRP	ENSG00000145779_cg17471836	-0.110322	-0.428394	1	5.16176e-05	mSpecific	cg17471836	maleAmplifier	-0.0645449	-0.236333	1	0.000632529	5	118691007	Body-shore	ENSG00000145779	TNFAIP8	25816	1.20058	0.485078	1.58796	3.15499e-09
KIRP	ENSG00000146592_cg11301281	-0.642416	-0.448695	0.020145	4.18324e-06	overlap	cg11301281	maleAmplifier	-0.0501617	-0.157692	1	1.55578e-05	7	28513286	5'UTR-opensea	ENSG00000146592	CREB5	9586	2.88521	0.0316293	2.92173	1.12293e-09
KIRP	ENSG00000147251_cg18785414	-0.279494	-0.502537	1	0	mSpecific	cg18785414	maleAmplifier	-0.090213	-0.323372	1	2.37555e-12	X	117631015	Body-shore	ENSG00000147251	DOCK11	139818	1.14155	1	1.34971	5.11049e-06
KIRP	ENSG00000149591_cg11609668	-0.631639	-0.62337	0.0382752	0	overlap	cg11609668	maleAmplifier	0.0225409	0.0404704	1	2.88035e-13	11	117075078	3'UTR-opensea	ENSG00000149591	TAGLN	6876	-2.30419	0.827613	-2.32441	6.09911e-07
KIRP	ENSG00000154133_cg03988533	-0.578958	-0.382768	0.612947	0.00537232	mSpecific	cg03988533	maleAmplifier	0.0436524	0.0710743	1	2.21663e-21	11	124765360	Body-opensea	ENSG00000154133	ROBO4	54538	-2.53333	0.025152	-2.86841	1.18297e-09	P
KIRP	ENSG00000154930_cg00522333	-0.553675	-0.484508	1	0	mSpecific	cg00522333	maleAmplifier	0.0537452	0.183578	1	2.69442e-13	20	25036597	Body-shore	ENSG00000154930	ACSS1	84532	-0.657544	1	-1.07129	1.10909e-06
KIRP	ENSG00000159176_cg18139641	-0.503815	-0.403858	1	0.000697695	mSpecific	cg18139641	maleAmplifier	0.0273235	0.0581707	1	5.46362e-09	1	201470467	5'UTR-opensea	ENSG00000159176	CSRP1	1465	-1.21866	0.0897535	-1.50006	1.147e-08
KIRP	ENSG00000160211_cg14013497	-0.59996	-0.557342	0.213098	0	mSpecific	cg14013497	maleAmplifier	-0.125849	-0.279185	1	6.36124e-08	X	153770094	TSS1500-opensea	ENSG00000160211	G6PD	2539	1.33634	0.148755	0.948492	1.18773e-06
KIRP	ENSG00000161996_cg06505619	-0.455718	-0.363768	1	0.02993	mSpecific	cg06505619	maleAmplifier	-0.0496061	-0.17365	1	0.00193024	16	698072	TSS1500-shore	ENSG00000161996	WDR90	197335	0.956931	0.138489	1.30587	8.70448e-09
KIRP	ENSG00000163145_cg01939704	-0.51419	-0.497724	1	0	mSpecific	cg01939704	maleAmplifier	0.0085495	0.0370779	1	1.00785e-05	4	15376129	Body-opensea	ENSG00000163145	C1QTNF7	114905	-3.88659	0.0271545	-4.36525	4.99242e-09
KIRP	ENSG00000163145_cg06097727	-0.456926	-0.413232	1	0.000267078	mSpecific	cg06097727	maleAmplifier	0.0147312	0.0458588	1	0.00440868	4	15376119	Body-opensea	ENSG00000163145	C1QTNF7	114905	-3.88659	0.0271545	-4.36525	4.99242e-09
KIRP	ENSG00000163435_cg11802442	-0.687996	-0.447626	0	4.85377e-06	overlap	cg11802442	maleAmplifier	-0.155574	-0.311952	1	1.52951e-13	1	201984631	3'UTR-opensea	ENSG00000163435	ELF3	1999	1.68286	1	1.11187	0.000427931
KIRP	ENSG00000166856_cg19824441	-0.549445	-0.37835	1	0.00808836	mSpecific	cg19824441	maleAmplifier	0.0866882	0.152306	1	2.34817e-23	12	57388312	TSS200-opensea	ENSG00000166856	GPR182	11318	-3.7064	0.0146216	-4.30424	3.34684e-10
KIRP	ENSG00000167874_cg06941557	-0.608773	-0.370189	0.134445	0.0169524	mSpecific	cg06941557	maleAmplifier	0.0687603	0.0995704	0.00684987	5.46181e-27	17	7757543	3'UTR-island	ENSG00000167874	TMEM88	92162	-1.55448	0.103806	-1.82603	1.79152e-09
KIRP	ENSG00000170873_cg15235922	-0.413059	-0.440701	1	1.20147e-05	mSpecific	cg15235922	maleAmplifier	0.03031	0.13272	1	8.81482e-05	8	125678187	Body-opensea	ENSG00000170873	MTSS1	9788	-0.50896	1	-0.746434	0.00227438
KIRP	ENSG00000170955_cg12479098	-0.437738	-0.394646	1	0.00173398	mSpecific	cg12479098	maleAmplifier	-0.0414629	-0.183612	1	0.00741257	11	6342231	TSS1500-shore	ENSG00000170955	PRKCDBP	112464	1.33218	1	1.50536	2.76416e-05
KIRP	ENSG00000171604_cg03992638	-0.560072	-0.535691	1	0	mSpecific	cg03992638	maleAmplifier	0.100535	0.262954	1	1.4375e-06	5	139037323	5'UTR-shelf	ENSG00000171604	CXXC5	51523	-0.646165	1	-0.725101	5.64652e-05
KIRP	ENSG00000172183_cg02334775	-0.393971	-0.367567	1	0.0214134	mSpecific	cg02334775	maleAmplifier	-0.0790939	-0.21602	1	7.24791e-05	15	89182676	Body-opensea	ENSG00000172183	ISG20	3669	1.81297	0.0621501	1.87446	4.5098e-09
KIRP	ENSG00000172493_cg17813310	-0.380071	-0.444068	1	7.81549e-06	mSpecific	cg17813310	maleAmplifier	0.0320793	0.201417	1	0.000176065	4	87974092	Body-opensea	ENSG00000172493	AFF1	4299	-0.305129	1	-0.564775	2.28296e-05
KIRP	ENSG00000172935_cg02920396	-0.345169	-0.378423	1	0.0080344	mSpecific	cg02920396	maleAmplifier	0.0255402	0.0730164	1	1.69781e-10	11	68782211	TSS1500-shelf	ENSG00000172935	MRGPRF	116535	-3.61151	0.0271545	-3.63114	1.09404e-09
KIRP	ENSG00000172935_cg05771342	-0.424744	-0.434054	1	2.68846e-05	mSpecific	cg05771342	maleAmplifier	0.0782585	0.166485	1	3.42451e-27	11	68782202	TSS1500-shelf	ENSG00000172935	MRGPRF	116535	-3.61151	0.0271545	-3.63114	1.09404e-09
KIRP	ENSG00000175121_cg05203217	-0.457782	-0.359755	1	0.0424354	mSpecific	cg05203217	maleAmplifier	-0.0267218	-0.161871	1	0.0142336	20	43730072	TSS1500-shore	ENSG00000175121	WFDC5	149708	1.45335	1	2.98954	0.0332003
KIRP	ENSG00000178878_cg02813863	-0.523407	-0.384783	1	0.00444904	mSpecific	cg02813863	maleAmplifier	0.0392163	0.0940309	1	5.45102e-24	12	12938287	Body-shore	ENSG00000178878	APOLD1	81575	-1.22224	1	-2.64021	1.59635e-06
KIRP	ENSG00000178878_cg16747828	-0.519176	-0.358947	1	0.0455032	mSpecific	cg16747828	maleAmplifier	0.057207	0.0944223	1	7.55432e-14	12	12938425	Body-shore	ENSG00000178878	APOLD1	81575	-1.22224	1	-2.64021	1.59635e-06
KIRP	ENSG00000178878_cg10635645	-0.590189	-0.425529	0.3508	7.11544e-05	mSpecific	cg10635645	maleAmplifier	0.0519304	0.0870195	1	1.66338e-29	12	12938397	Body-shore	ENSG00000178878	APOLD1	81575	-1.22224	1	-2.64021	1.59635e-06
KIRP	ENSG00000184574_cg25655096	-0.0148825	-0.419214	1	0.000141761	mSpecific	cg25655096	maleAmplifier	-0.00841715	-0.357706	1	1.34355e-06	12	6745292	1stExon-opensea	ENSG00000184574	LPAR5	57121	1.73175	0.63472	2.88049	5.24977e-10
KIRP	ENSG00000184574_cg19345219	-0.0324595	-0.387449	1	0.00345956	mSpecific	cg19345219	maleAmplifier	-0.0591738	-0.410459	1	4.11739e-15	12	6747405	3'UTR-opensea	ENSG00000184574	LPAR5	57121	1.73175	0.63472	2.88049	5.24977e-10
KIRP	ENSG00000184574_cg06588028	-0.245247	-0.436262	1	2.0686e-05	mSpecific	cg06588028	maleAmplifier	-0.121621	-0.406917	1	4.53047e-09	12	6745568	TSS1500-opensea	ENSG00000184574	LPAR5	57121	1.73175	0.63472	2.88049	5.24977e-10
KIRP	ENSG00000184574_cg05924780	-0.0795497	-0.384312	1	0.00465028	mSpecific	cg05924780	maleAmplifier	-0.138915	-0.355588	1	1.80318e-12	12	6745524	TSS1500-opensea	ENSG00000184574	LPAR5	57121	1.73175	0.63472	2.88049	5.24977e-10
KIRP	ENSG00000184574_cg18951718	0.0209766	-0.358365	1	0.047839	mSpecific	cg18951718	maleAmplifier	-0.0282018	-0.348774	1	1.02986e-07	12	6745343	TSS200-opensea	ENSG00000184574	LPAR5	57121	1.73175	0.63472	2.88049	5.24977e-10
KIRP	ENSG00000184675_cg01127291	-0.307698	-0.383713	1	0.00491874	mSpecific	cg01127291	maleAmplifier	0.0464538	0.19943	1	4.48973e-08	X	63424405	5'UTR-island	ENSG00000184675	AMER1	139285	-0.634225	1	-0.722406	1.42488e-05	P
KIRP	ENSG00000184675_cg08690835	-0.29279	-0.359915	1	0.0418536	mSpecific	cg08690835	maleAmplifier	0.0367935	0.150855	1	1.65568e-05	X	63424140	5'UTR-shore	ENSG00000184675	AMER1	139285	-0.634225	1	-0.722406	1.42488e-05	P
KIRP	ENSG00000186517_cg13466383	-0.41044	-0.419201	1	0.000141956	mSpecific	cg13466383	maleAmplifier	-0.13769	-0.185686	5.74406e-06	2.63161e-43	1	161008705	5'UTR-island	ENSG00000186517	ARHGAP30	257106	1.32566	0.321951	1.89108	1.36172e-06
KIRP	ENSG00000186517_cg13906823	-0.351565	-0.420133	1	0.000128418	mSpecific	cg13906823	maleAmplifier	-0.124215	-0.177656	0.00365918	1.50689e-43	1	161008824	TSS200-island	ENSG00000186517	ARHGAP30	257106	1.32566	0.321951	1.89108	1.36172e-06
KIRP	ENSG00000186517_cg24161057	-0.362494	-0.395888	1	0.00153645	mSpecific	cg24161057	maleAmplifier	-0.120928	-0.159915	0.000272239	4.21057e-45	1	161008811	TSS200-island	ENSG00000186517	ARHGAP30	257106	1.32566	0.321951	1.89108	1.36172e-06
KIRP	ENSG00000187045_cg19979738	-0.244542	-0.402634	1	0.000788813	mSpecific	cg19979738	maleAmplifier	-0.101191	-0.237696	1	1.0135e-05	22	37496929	Body-shelf	ENSG00000187045	TMPRSS6	164656	2.2925	1	2.96723	3.32829e-08
KIRP	ENSG00000187678_cg27041304	-0.441364	-0.490101	1	0	mSpecific	cg27041304	maleAmplifier	0.0855009	0.121246	0.000411217	6.21315e-38	5	141693865	Body-opensea	ENSG00000187678	SPRY4	81848	-0.712999	1	-0.919486	0.00192099
KIRP	ENSG00000187800_cg07025432	-0.634056	-0.372138	0.0332716	0.0142331	overlap	cg07025432	maleAmplifier	0.0383814	0.0720396	1	2.5689e-15	1	156865515	5'UTR-shore	ENSG00000187800	PEAR1	375033	-1.90975	0.453294	-2.11806	1.74579e-09
KIRP	ENSG00000187800_cg00850996	-0.251039	-0.432169	1	3.35083e-05	mSpecific	cg00850996	maleAmplifier	0.0277067	0.0650926	1	9.49026e-13	1	156874489	Body-shelf	ENSG00000187800	PEAR1	375033	-1.90975	0.453294	-2.11806	1.74579e-09
KIRP	ENSG00000188277_cg19095568	-0.356098	-0.390203	1	0.00266141	mSpecific	cg19095568	maleAmplifier	-0.203189	-0.331784	1	1.00306e-28	15	41062113	Body-opensea	ENSG00000188277	C15orf62	643338	0.0345298	1	0.518803	0.0489785
KIRP	ENSG00000189143_cg04663842	-0.406562	-0.401604	1	0.000874246	mSpecific	cg04663842	maleAmplifier	-0.062364	-0.133432	1	2.90032e-23	7	73242001	IGR-shelf	ENSG00000189143	CLDN4	1364	1.25018	1	1.32298	0.000914454
KIRP	ENSG00000196639_cg13593758	-0.678729	-0.371089	0.000347427	0.0156401	overlap	cg13593758	maleAmplifier	-0.199039	-0.349803	1	3.38707e-15	3	11178365	TSS1500-opensea	ENSG00000196639	HRH1	3269	2.24903	0.197582	2.4016	3.40665e-09
KIRP	ENSG00000197070_cg13741304	-0.585203	-0.369597	0.450297	0.0178747	mSpecific	cg13741304	maleAmplifier	-0.0664291	-0.222674	1	5.3017e-07	9	140501305	Body-shore	ENSG00000197070	ARRDC1	92714	0.66133	1	0.565573	0.000189086
KIRP	ENSG00000198467_cg13969788	-0.502455	-0.43294	1	3.06321e-05	mSpecific	cg13969788	maleAmplifier	0.0445087	0.068509	1	6.08912e-21	9	35689475	Body-shore	ENSG00000198467	TPM2	7169	-0.957166	1	-1.37116	0.000897013
KIRP	ENSG00000203685_cg13952899	-0.256025	-0.427516	1	5.69844e-05	mSpecific	cg13952899	maleAmplifier	0.0696191	0.176637	1	4.07098e-06	1	226739292	Body-shore	ENSG00000203685	C1orf95	375057	-1.93131	1	-3.38551	1.55302e-05
KIRP	ENSG00000204394_cg19868593	-0.319534	-0.367562	1	0.0214231	mSpecific	cg19868593	maleAmplifier	-0.0437898	-0.0674853	1	3.27849e-37	6	31744816	5'UTR-opensea	ENSG00000204394	VARS	7407	0.624104	1	0.758432	4.00565e-06
KIRP	ENSG00000204538_cg02867250	-0.426305	-0.443546	1	8.36468e-06	mSpecific	cg02867250	maleAmplifier	-0.11178	-0.226437	1	4.32565e-08	6	31107835	3'UTR-opensea	ENSG00000204538	PSORS1C2	170680	3.74046	0.344905	2.88654	1.0164e-07
KIRP	ENSG00000204540_cg11468993	-0.677722	-0.550598	0.000518996	0	overlap	cg11468993	maleAmplifier	-0.182411	-0.378202	1	1.04536e-12	6	31082939	3'UTR-opensea	ENSG00000204540	PSORS1C1	170679	3.63297	0.0461344	4.08871	5.5341e-10
KIRP	ENSG00000204540_cg02867250	-0.495253	-0.45961	1	6.97982e-07	mSpecific	cg02867250	maleAmplifier	-0.11178	-0.226437	1	4.32565e-08	6	31107835	3'UTR-opensea	ENSG00000204540	PSORS1C1	170679	3.63297	0.0461344	4.08871	5.5341e-10
KIRP	ENSG00000204540_cg05545351	-0.792199	-0.578972	0	0	overlap	cg05545351	maleAmplifier	-0.286084	-0.436816	1	3.37444e-21	6	31082835	5'UTR-opensea	ENSG00000204540	PSORS1C1	170679	3.63297	0.0461344	4.08871	5.5341e-10
KIRP	ENSG00000204950_cg25595636	-0.357256	-0.402896	1	0.000768401	mSpecific	cg25595636	maleAmplifier	0.0666225	0.101089	1	7.42269e-31	11	61278148	1stExon-shore	ENSG00000204950	LRRC10B	390205	-2.31421	0.395577	-3.74105	8.2325e-07
KIRP	ENSG00000241119_cg15559700	-0.487346	-0.365976	1	0.0246482	mSpecific	cg15559700	maleAmplifier	0.0333042	0.0644068	1	1.26512e-14	2	234579873	TSS1500-opensea	ENSG00000241119	UGT1A9	54600	-5.83801	1	-5.26128	5.64652e-05
THCA	ENSG00000187498_cg18792803	-0.395746	-0.444056	1.01713e-10	0.0336926	overlap	cg18792803	maleAmplifier	-0.0490094	-0.0796961	2.4328e-06	0.00740583	13	110919641	Body-shore	ENSG00000187498	COL4A1	1282	1.54437	7.33136e-15	2.02285	6.18475e-05
THCA	ENSG00000240583_cg04551925	-0.505706	-0.660108	0	0	overlap	cg04551925	maleAmplifier	-0.0429891	-0.0736594	7.92747e-05	0.0189911	7	30951740	1stExon-opensea	ENSG00000240583	AQP1	358	0.890788	3.46543e-06	1.11012	0.011847
HNSC	ENSG00000002822_cg23807071	-0.31499	-0.435478	1	0	mSpecific	cg23807071	maleAmplifier	-0.228044	-0.311374	8.14636e-06	1.85416e-21	7	1980222	Body-shore	ENSG00000002822	MAD1L1	8379	1.57168	1	2.18228	7.84431e-06
HNSC	ENSG00000008441_cg12522311	-0.187076	-0.277943	1	0.0225046	mSpecific	cg12522311	maleAmplifier	0.18104	0.265641	0.152932	1.62108e-20	19	13113893	Body-shore	ENSG00000008441	NFIX	4784	-1.51001	0.0525013	-1.6293	8.78942e-08
HNSC	ENSG00000060982_cg04011247	-0.356713	-0.32839	1	4.06031e-05	mSpecific	cg04011247	maleAmplifier	-0.048168	-0.168616	1	0.0071883	12	25102274	1stExon-shore	ENSG00000060982	BCAT1	586	1.86349	1	2.28973	0.0212051
HNSC	ENSG00000065361_cg11835619	-0.126387	-0.308444	1	0.000569138	mSpecific	cg11835619	maleAmplifier	0.121766	0.205227	1	1.2411e-12	12	56475064	Body-shore	ENSG00000065361	ERBB3	2065	-1.02514	0.0716807	-1.29048	5.30898e-06	P
HNSC	ENSG00000069011_cg15922699	-0.231725	-0.285463	1	0.00944882	mSpecific	cg15922699	maleAmplifier	0.099239	0.202102	1	1.91362e-10	5	134362967	IGR-shore	ENSG00000069011	PITX1	5307	-2.18592	1	-2.22533	1.54983e-05
HNSC	ENSG00000072210_cg19171383	-0.287455	-0.362527	1	2.64653e-07	mSpecific	cg19171383	maleAmplifier	0.117391	0.203069	1	3.30185e-09	17	19555084	Body-shelf	ENSG00000072210	ALDH3A2	224	-1.03157	0.677161	-1.15593	5.1078e-05
HNSC	ENSG00000074657_cg06487082	-0.176245	-0.305137	1	0.000865493	mSpecific	cg06487082	maleAmplifier	-0.0237955	-0.0750414	1	0.00641487	18	56530106	1stExon-shore	ENSG00000074657	ZNF532	55205	0.842707	0.370506	1.00163	1.05557e-05
HNSC	ENSG00000090339_cg08427717	-0.406374	-0.304115	0.809592	0.000984199	mSpecific	cg08427717	maleAmplifier	-0.0992418	-0.153381	0.188212	2.81023e-10	19	10381383	TSS200-island	ENSG00000090339	ICAM1	3383	0.992704	1	1.38641	0.000729427
HNSC	ENSG00000099875_cg13220129	-0.155255	-0.29398	1	0.00343052	mSpecific	cg13220129	maleAmplifier	0.233333	0.330099	4.86861e-07	6.62104e-49	19	2046193	Body-island	ENSG00000099875	MKNK2	2872	-0.429552	1	-0.983904	0.000331075
HNSC	ENSG00000100949_cg18254364	-0.370907	-0.288957	1	0.00625977	mSpecific	cg18254364	maleAmplifier	0.094598	0.163197	1	1.26789e-15	14	24741821	TSS1500-shore	ENSG00000100949	RABGGTA	5875	-0.895459	0.0185736	-0.906146	2.16249e-06
HNSC	ENSG00000102349_cg01355242	-0.0130892	-0.28592	1	0.00895651	mSpecific	cg01355242	maleAmplifier	0.0425947	0.177322	1	0.00193237	X	56258387	TSS1500-shore	ENSG00000102349	KLF8	11279	-1.03224	1	-1.49921	4.56912e-05
HNSC	ENSG00000103653_cg02566978	-0.376918	-0.331931	1	2.48854e-05	mSpecific	cg02566978	maleAmplifier	0.0691172	0.182133	1	8.73595e-05	15	75076251	5'UTR-shore	ENSG00000103653	CSK	1445	-0.345713	1	-0.666508	0.0262806
HNSC	ENSG00000104951_cg06388099	-0.165873	-0.271299	1	0.0474527	mSpecific	cg06388099	maleAmplifier	-0.0441922	-0.115135	1	1.17755e-09	19	50400885	TSS1500-opensea	ENSG00000104951	IL4I1	259307	0.867163	1	1.7341	0.00028745
HNSC	ENSG00000105402_cg26979537	-0.409603	-0.376126	0.660593	2.70169e-08	mSpecific	cg26979537	maleAmplifier	0.124031	0.228785	1	2.32753e-14	19	48016860	Body-shore	ENSG00000105402	NAPA	8775	-0.51479	0.726108	-0.589788	0.000224171
HNSC	ENSG00000112306_cg04375784	-0.350937	-0.283778	1	0.0115016	mSpecific	cg04375784	maleAmplifier	0.0494144	0.139965	1	0.000118527	6	133137810	Body-shore	ENSG00000112306	RPS12	6206	-0.520504	1	-0.51593	0.0285062
HNSC	ENSG00000120254_cg00067414	-0.311696	-0.273186	1	0.0384648	mSpecific	cg00067414	maleAmplifier	-0.0644232	-0.140738	1	0.00384578	6	151188081	Body-island	ENSG00000120254	MTHFD1L	25902	1.16044	1	1.11865	0.0306014
HNSC	ENSG00000122641_cg15291905	-0.207543	-0.363822	1	2.15034e-07	mSpecific	cg15291905	maleAmplifier	-0.133818	-0.254746	1	4.96956e-10	7	41741671	5'UTR-shelf	ENSG00000122641	INHBA	3624	3.14541	0.147829	4.86306	5.20538e-10
HNSC	ENSG00000122641_cg11079619	-0.166311	-0.328243	1	4.14322e-05	mSpecific	cg11079619	maleAmplifier	-0.0644162	-0.162998	1	0.00330687	7	41742630	5'UTR-shelf	ENSG00000122641	INHBA	3624	3.14541	0.147829	4.86306	5.20538e-10
HNSC	ENSG00000126950_cg14464718	0.101062	-0.361986	1	2.88525e-07	mSpecific	cg14464718	maleAmplifier	0.104668	0.266825	1	4.98768e-08	X	100334126	Body-opensea	ENSG00000126950	TMEM35	59353	-1.36612	1	-1.75913	0.0417971
HNSC	ENSG00000126950_cg13340269	0.203048	-0.288558	1	0.00656339	mSpecific	cg13340269	maleAmplifier	0.0951697	0.243312	1	4.11882e-07	X	100333778	TSS200-opensea	ENSG00000126950	TMEM35	59353	-1.36612	1	-1.75913	0.0417971
HNSC	ENSG00000126950_cg16510657	0.0277425	-0.437028	1	0	mSpecific	cg16510657	maleAmplifier	0.0737647	0.259005	1	3.83017e-09	X	100333950	1stExon-opensea	ENSG00000126950	TMEM35	59353	-1.36612	1	-1.75913	0.0417971
HNSC	ENSG00000130988_cg03139204	-0.279197	-0.286989	1	0.00789965	mSpecific	cg03139204	maleAmplifier	0.130937	0.263018	1	4.73477e-13	X	46937658	TSS200-island	ENSG00000130988	RGN	9104	-1.62601	1	-1.39261	0.000274191
HNSC	ENSG00000130988_cg06472116	-0.251551	-0.341764	1	6.16568e-06	mSpecific	cg06472116	maleAmplifier	0.112787	0.241898	1	1.08827e-20	X	46937653	TSS200-island	ENSG00000130988	RGN	9104	-1.62601	1	-1.39261	0.000274191
HNSC	ENSG00000130988_cg09625066	-0.235905	-0.324783	1	6.64107e-05	mSpecific	cg09625066	maleAmplifier	0.139714	0.259093	1	2.80945e-20	X	46937571	TSS1500-shore	ENSG00000130988	RGN	9104	-1.62601	1	-1.39261	0.000274191
HNSC	ENSG00000136193_cg06133110	-0.454636	-0.489876	0.0311127	0	overlap	cg06133110	maleAmplifier	-0.0917191	-0.252181	1	2.28014e-11	7	30028307	5'UTR-shore	ENSG00000136193	SCRN1	9805	0.874701	0.206691	1.71243	8.53076e-07
HNSC	ENSG00000137868_cg22672067	-0.162441	-0.340584	1	7.31065e-06	mSpecific	cg22672067	maleAmplifier	-0.0442141	-0.115028	1	5.37691e-06	15	74495637	5'UTR-opensea	ENSG00000137868	STRA6	64220	1.82537	1	1.59791	0.00201751
HNSC	ENSG00000140497_cg15299233	-0.263989	-0.30613	1	0.000763499	mSpecific	cg15299233	maleAmplifier	0.110878	0.209063	1	6.04294e-06	15	75162173	Body-shelf	ENSG00000140497	SCAMP2	10066	-0.369342	1	-0.660361	0.000673029
HNSC	ENSG00000143013_cg20701183	-0.451935	-0.379698	0.0378353	1.41097e-08	overlap	cg20701183	maleAmplifier	0.102178	0.224663	1	0.000489117	1	87799914	Body-shore	ENSG00000143013	LMO4	8543	-0.916995	1	-1.04872	0.0029709
HNSC	ENSG00000145916_cg24187797	-0.159862	-0.303705	1	0.00103621	mSpecific	cg24187797	maleAmplifier	0.0815977	0.163665	1	9.70237e-15	5	177571022	Body-opensea	ENSG00000145916	RMND5B	64777	-1.51047	0.0246697	-1.92801	3.20591e-08
HNSC	ENSG00000147119_cg00191052	-0.367982	-0.447652	1	0	mSpecific	cg00191052	maleAmplifier	-0.140299	-0.301281	1	1.29102e-07	X	46432770	TSS1500-shore	ENSG00000147119	CHST7	56548	1.77413	1	1.85681	4.79802e-07
HNSC	ENSG00000147144_cg07419178	-0.232675	-0.374338	1	3.703e-08	mSpecific	cg07419178	maleAmplifier	0.0416664	0.140543	1	2.73974e-08	X	48916555	5'UTR-opensea	ENSG00000147144	CCDC120	90060	-0.961782	0.412637	-1.42468	1.8882e-07
HNSC	ENSG00000162244_cg00866632	-0.331356	-0.349408	1	2.00406e-06	mSpecific	cg00866632	maleAmplifier	0.0719296	0.164316	1	3.83073e-05	3	52028763	Body-shore	ENSG00000162244	RPL29	6159	-0.822646	1	-0.826928	8.15499e-06
HNSC	ENSG00000163820_cg19145607	-0.117595	-0.293431	1	0.0036656	mSpecific	cg19145607	maleAmplifier	0.0824646	0.198481	1	4.80115e-08	3	45983792	TSS1500-opensea	ENSG00000163820	FYCO1	79443	-0.789296	0.778404	-1.06845	3.63896e-07
HNSC	ENSG00000167701_cg11211951	-0.332696	-0.271042	1	0.0488202	mSpecific	cg11211951	maleAmplifier	0.0495608	0.12894	1	1.32411e-05	8	145729740	1stExon-shore	ENSG00000167701	GPT	2875	-2.27562	0.0504832	-2.84466	8.53076e-07
HNSC	ENSG00000169972_cg17709975	-0.300251	-0.289857	1	0.00562537	mSpecific	cg17709975	maleAmplifier	0.0256525	0.0528246	1	3.5894e-07	1	1248492	Body-island	ENSG00000169972	PUSL1	126789	-0.558186	1	-0.553145	0.0475819
HNSC	ENSG00000170142_cg19719475	-0.345364	-0.331694	1	2.57193e-05	mSpecific	cg19719475	maleAmplifier	0.0585295	0.187092	1	7.37404e-07	3	23849114	Body-shore	ENSG00000170142	UBE2E1	7324	-0.38815	1	-0.74505	9.4317e-05
HNSC	ENSG00000172831_cg09203199	-0.212401	-0.28843	1	0.00666318	mSpecific	cg09203199	maleAmplifier	0.0374379	0.0609311	1	3.68023e-16	16	66970577	Body-shore	ENSG00000172831	CES2	8824	-1.35503	1	-1.82777	7.64364e-06
HNSC	ENSG00000177202_cg01274752	-0.246955	-0.278382	1	0.021406	mSpecific	cg01274752	maleAmplifier	0.0472502	0.137495	1	1.54008e-06	19	49120447	Body-shore	ENSG00000177202	SPACA4	171169	-2.25058	1	-1.7267	2.80852e-05
HNSC	ENSG00000213024_cg06388099	-0.0242567	-0.27728	1	0.0242632	mSpecific	cg06388099	maleAmplifier	-0.0441922	-0.115135	1	1.17755e-09	19	50400885	TSS1500-opensea	ENSG00000213024	NUP62	23636	0.26183	1	0.575525	0.000510005
LIHC	ENSG00000021300_cg23931323	0.595017	0.373154	0	0.000331155	overlap	cg23931323	maleAmplifier	-0.12502	-0.282371	1	8.64248e-28	11	73372278	Body-island	ENSG00000021300	PLEKHB1	58473	-3.5115	3.09996e-06	-3.48132	5.46291e-11
LIHC	ENSG00000021300_cg09185399	0.422636	0.375157	0.474519	0.000265085	mSpecific	cg09185399	maleAmplifier	-0.036327	-0.14028	1	7.32523e-06	11	73372479	Body-island	ENSG00000021300	PLEKHB1	58473	-3.5115	3.09996e-06	-3.48132	5.46291e-11
LIHC	ENSG00000091622_cg13475484	0.399742	0.422749	1	6.53984e-07	mSpecific	cg13475484	maleAmplifier	-0.00609765	-0.136812	1	7.25618e-05	17	6399562	Body-opensea	ENSG00000091622	PITPNM3	83394	-2.87719	3.3102e-07	-3.11044	1.19768e-12
LIHC	ENSG00000106536_cg08037235	0.406439	0.353873	1	0.00260561	mSpecific	cg08037235	maleAmplifier	-0.0868345	-0.197576	1	2.29623e-06	7	39013676	IGR-shore	ENSG00000106536	POU6F2	11281	-4.34916	0.000770336	-4.32811	2.16153e-05
LIHC	ENSG00000133477_cg14290616	0.520657	0.42349	0.000284482	5.83338e-07	overlap	cg14290616	maleAmplifier	-0.0633134	-0.181218	1	4.05779e-23	22	40420987	Body-shelf	ENSG00000133477	FAM83F	113828	-3.62297	0.00017014	-5.23882	1.33934e-10
LIHC	ENSG00000166206_cg02583228	0.494323	0.415406	0.00299703	1.9066e-06	overlap	cg02583228	maleAmplifier	-0.0695737	-0.215072	1	4.11829e-05	15	26885279	Body-opensea	ENSG00000166206	GABRB3	2562	-3.0003	1	-4.43237	0.00119778
LIHC	ENSG00000170442_cg25029197	0.220055	0.415204	1	1.96098e-06	mSpecific	cg25029197	maleAmplifier	0.00652435	0.243177	1	0.00507044	12	52639196	Body-island	ENSG00000170442	KRT86	3892	2.55305	0.00162618	2.0224	0.0351412
LIHC	ENSG00000188064_cg10888337	0.284565	0.32571	1	0.0418575	mSpecific	cg10888337	maleAmplifier	-0.00301554	-0.324231	1	7.76043e-12	22	46366859	Body-island	ENSG00000188064	WNT7B	7477	-3.05348	3.65166e-05	-3.0803	3.30832e-10
LIHC	ENSG00000188064_cg22306173	0.289892	0.379226	1	0.000167793	mSpecific	cg22306173	maleAmplifier	-0.0748977	-0.217378	1	5.06237e-10	22	46368025	Body-island	ENSG00000188064	WNT7B	7477	-3.05348	3.65166e-05	-3.0803	3.30832e-10
LIHC	ENSG00000196482_cg01432520	0.535625	0.655294	4.13808e-05	0	overlap	cg01432520	maleAmplifier	-0.103591	-0.299446	1	7.37624e-05	1	217068243	5'UTR-opensea	ENSG00000196482	ESRRG	2104	-2.02291	1	-2.85569	0.000196436
LIHC	ENSG00000196482_cg10090568	0.549585	0.594081	0	0	overlap	cg10090568	maleAmplifier	-0.0586194	-0.294099	1	3.49637e-06	1	217241497	5'UTR-opensea	ENSG00000196482	ESRRG	2104	-2.02291	1	-2.85569	0.000196436
LIHC	ENSG00000197415_cg11299991	0.242968	0.342815	1	0.00800449	mSpecific	cg11299991	maleAmplifier	-0.0882818	-0.274413	1	5.30856e-05	3	157154687	5'UTR-shore	ENSG00000197415	VEPH1	79674	-2.90186	0.000412683	-2.33969	0.00015893
LUAD	ENSG00000134398_cg01460202	0.339869	0.47788	0.0484244	0	overlap	cg01460202	maleAmplifier	0.21069	0.342578	3.61106e-06	2.10599e-14	16	23706506	Body-opensea	ENSG00000134398	ERN2	10595	2.96679	0.000156754	3.93489	2.61669e-05
LUAD	ENSG00000134398_cg05131483	0.35166	0.392114	0.0164164	0.00234389	overlap	cg05131483	maleAmplifier	0.238348	0.354476	2.79434e-06	8.4546e-10	16	23706242	Body-opensea	ENSG00000134398	ERN2	10595	2.96679	0.000156754	3.93489	2.61669e-05
LUSC	ENSG00000005073_cg05767159	0.267663	0.383092	1	6.85339e-05	mSpecific	cg05767159	maleAmplifier	0.0571967	0.152735	1	2.20522e-07	7	27231204	IGR-shore	ENSG00000005073	HOXA11	3207	4.48782	0.0384161	3.84522	5.48699e-12
LUSC	ENSG00000005073_cg26464446	0.402708	0.442332	1	0	mSpecific	cg26464446	maleAmplifier	0.0196445	0.122947	1	0.00308787	7	27221557	3'UTR-shore	ENSG00000005073	HOXA11	3207	4.48782	0.0384161	3.84522	5.48699e-12
LUSC	ENSG00000112333_cg13784235	0.307058	0.34971	1	0.00280562	mSpecific	cg13784235	maleAmplifier	0.11759	0.226959	1	4.74378e-11	6	108495865	Body-island	ENSG00000112333	NR2E1	7101	1.71707	1	2.14194	0.00970489
LUSC	ENSG00000116132_cg22797031	0.0872947	0.346071	1	0.00409703	mSpecific	cg22797031	maleAmplifier	0.138577	0.217379	1	9.50987e-16	1	170630070	IGR-shore	ENSG00000116132	PRRX1	5396	1.00846	1	1.17612	2.34828e-07
LUSC	ENSG00000149256_cg17395738	0.148323	0.376459	1	0.000148721	mSpecific	cg17395738	maleAmplifier	0.0515557	0.204382	1	5.88737e-05	11	78534297	Body-opensea	ENSG00000149256	TENM4	26011	2.62778	0.00223816	2.2312	8.64152e-13
LUSC	ENSG00000197757_cg12905836	0.365634	0.400327	1	8.18979e-06	mSpecific	cg12905836	maleAmplifier	0.0304249	0.143095	1	0.0105985	12	54409770	TSS1500-shore	ENSG00000197757	HOXC6	3223	2.71466	0.054241	2.95556	2.67044e-13
LUSC	ENSG00000197757_cg13826247	0.502572	0.537468	0.297014	0	mSpecific	cg13826247	maleAmplifier	0.10832	0.211088	1	5.31998e-05	12	54424203	5'UTR-shore	ENSG00000197757	HOXC6	3223	2.71466	0.054241	2.95556	2.67044e-13
LUSC	ENSG00000197757_cg21582112	0.503988	0.54107	0.273766	0	mSpecific	cg21582112	maleAmplifier	0.113021	0.223479	1	1.60412e-08	12	54421335	5'UTR-shelf	ENSG00000197757	HOXC6	3223	2.71466	0.054241	2.95556	2.67044e-13
LUSC	ENSG00000198353_cg11795276	0.499329	0.512287	0.35753	0	mSpecific	cg11795276	maleAmplifier	0.082602	0.187835	1	0.000277717	12	54454252	Body-island	ENSG00000198353	HOXC4	3221	2.62351	0.0448072	2.17476	1.05789e-10
LUSC	ENSG00000198353_cg12905836	0.264601	0.348874	1	0.00306181	mSpecific	cg12905836	maleAmplifier	0.0304249	0.143095	1	0.0105985	12	54409770	TSS1500-shore	ENSG00000198353	HOXC4	3221	2.62351	0.0448072	2.17476	1.05789e-10
LUSC	ENSG00000198353_cg03199745	0.343952	0.480026	1	0	mSpecific	cg03199745	maleAmplifier	0.0598477	0.134462	1	0.000302529	12	54454445	Body-island	ENSG00000198353	HOXC4	3221	2.62351	0.0448072	2.17476	1.05789e-10
LUSC	ENSG00000198353_cg13826247	0.431156	0.530831	1	0	mSpecific	cg13826247	maleAmplifier	0.10832	0.211088	1	5.31998e-05	12	54424203	5'UTR-shore	ENSG00000198353	HOXC4	3221	2.62351	0.0448072	2.17476	1.05789e-10
LUSC	ENSG00000198353_cg21582112	0.350241	0.488178	1	0	mSpecific	cg21582112	maleAmplifier	0.113021	0.223479	1	1.60412e-08	12	54421335	5'UTR-shelf	ENSG00000198353	HOXC4	3221	2.62351	0.0448072	2.17476	1.05789e-10
LUSC	ENSG00000260027_cg18878432	0.192674	0.389425	1	3.20477e-05	mSpecific	cg18878432	maleAmplifier	0.143798	0.257731	1	9.17592e-14	17	46683409	Body-shore	ENSG00000260027	HOXB7	3217	1.13484	1	0.991578	0.00116743
COAD	ENSG00000152669_cg26251325	0.28757	0.502993	1	1.65145e-05	mSpecific	cg26251325	maleAmplifier	0.117441	0.221752	1	2.2155e-08	5	54518745	IGR-shore	ENSG00000152669	CCNO	10309	2.04657	1.74622e-06	3.07783	6.62951e-08
COAD	ENSG00000234602_cg01286665	0.349143	0.475936	1	0.000382056	mSpecific	cg01286665	maleAmplifier	0.0654593	0.125624	1	0.00261307	5	54525925	IGR-shore	ENSG00000234602	MCIDAS	345643	2.83555	1.17751e-06	3.53147	1.16998e-07
COAD	ENSG00000234602_cg26251325	0.270169	0.518156	1	0	mSpecific	cg26251325	maleAmplifier	0.117441	0.221752	1	2.2155e-08	5	54518745	IGR-shore	ENSG00000234602	MCIDAS	345643	2.83555	1.17751e-06	3.53147	1.16998e-07
KIRC	ENSG00000082684_cg19389001	0.404651	0.385794	1	0.00482223	mSpecific	cg19389001	maleAmplifier	0.139651	0.193223	0.0161383	1.61083e-38	3	122640778	Body-island	ENSG00000082684	SEMA5B	54437	4.40429	4.9725e-07	4.08567	5.58505e-22
KIRC	ENSG00000082684_cg25439655	0.375938	0.391112	1	0.00292238	mSpecific	cg25439655	maleAmplifier	0.0960618	0.160258	1	3.13481e-39	3	122641248	Body-island	ENSG00000082684	SEMA5B	54437	4.40429	4.9725e-07	4.08567	5.58505e-22
KIRC	ENSG00000129055_cg06685080	0.251585	0.368286	1	0.0235874	mSpecific	cg06685080	maleAmplifier	-0.0687347	-0.146697	1	4.18609e-08	3	134190981	IGR-opensea	ENSG00000129055	ANAPC13	25847	-0.860503	3.77661e-06	-0.940853	3.92748e-19
KIRP	ENSG00000026508_cg19292760	0.192314	0.447033	1	5.26446e-06	mSpecific	cg19292760	maleAmplifier	0.112184	0.181275	1	1.71956e-21	11	35173592	Body-opensea	ENSG00000026508	CD44	960	0.906413	1	1.27763	0.000597091	P
KIRP	ENSG00000055118_cg04839131	0.359321	0.43009	1	4.25663e-05	mSpecific	cg04839131	maleAmplifier	0.024116	0.212914	1	0.00785677	7	150644715	Body-island	ENSG00000055118	KCNH2	3757	0.392945	1	2.35752	0.000510667
KIRP	ENSG00000055118_cg05998486	0.477021	0.524346	1	0	mSpecific	cg05998486	maleAmplifier	0.0118977	0.114897	1	0.00723835	7	150645092	Body-shore	ENSG00000055118	KCNH2	3757	0.392945	1	2.35752	0.000510667
KIRP	ENSG00000055118_cg15510325	0.0255093	0.380188	1	0.00682739	mSpecific	cg15510325	maleAmplifier	0.0286887	0.130872	1	0.000770546	7	150669058	Body-shelf	ENSG00000055118	KCNH2	3757	0.392945	1	2.35752	0.000510667
KIRP	ENSG00000072786_cg23423191	0.308101	0.375072	1	0.0109144	mSpecific	cg23423191	maleAmplifier	0.0795034	0.10701	6.48113e-05	4.07675e-56	5	171524525	Body-opensea	ENSG00000072786	STK10	6793	0.436392	1	0.458568	0.0380336
KIRP	ENSG00000101331_cg23929284	0.49203	0.373579	1	0.0124974	mSpecific	cg23929284	maleAmplifier	-0.0684527	-0.107436	1	2.26406e-41	20	30605916	Body-island	ENSG00000101331	CCM2L	140706	-1.92413	0.119953	-2.31404	1.26761e-08
KIRP	ENSG00000107593_cg22599822	0.364156	0.401507	1	0.000882746	mSpecific	cg22599822	maleAmplifier	0.0687678	0.120916	1	1.25691e-08	10	102090045	5'UTR-opensea	ENSG00000107593	PKD2L1	9033	2.56404	1	3.76342	1.08402e-06
KIRP	ENSG00000108823_cg04582295	0.242175	0.360384	1	0.0401893	mSpecific	cg04582295	maleAmplifier	-0.00610176	-0.138277	1	1.53866e-09	17	48242070	TSS1500-shelf	ENSG00000108823	SGCA	6442	-1.70578	1	-2.07858	1.30708e-05
KIRP	ENSG00000123388_cg10641615	0.508398	0.606096	1	0	mSpecific	cg10641615	maleAmplifier	0.0495408	0.232048	1	0.00804609	12	54359797	Body-island	ENSG00000123388	HOXC11	3227	2.09868	1	2.26474	4.40606e-07
KIRP	ENSG00000124813_cg03310503	0.200423	0.365311	1	0.0261371	mSpecific	cg03310503	maleAmplifier	0.0763837	0.137257	1	1.61623e-17	6	45609836	IGR-opensea	ENSG00000124813	RUNX2	860	1.14543	1	1.27347	6.53735e-07
KIRP	ENSG00000129946_cg02360676	0.506887	0.362584	1	0.0331943	mSpecific	cg02360676	maleAmplifier	0.0236084	0.0981241	1	0.0382617	19	418205	3'UTR-shore	ENSG00000129946	SHC2	25759	1.30914	1	1.15189	0.00980443
KIRP	ENSG00000132692_cg00502190	0.529853	0.382281	1	0.00562233	mSpecific	cg00502190	maleAmplifier	0.287544	0.454126	1	7.23786e-30	1	156616560	Body-island	ENSG00000132692	BCAN	63827	3.42496	0.321951	2.30296	3.7418e-07
KIRP	ENSG00000139973_cg18078170	0.254514	0.401021	1	0.000926572	mSpecific	cg18078170	maleAmplifier	0.0582024	0.112788	1	1.18498e-19	14	62538810	Body-opensea	ENSG00000139973	SYT16	83851	2.68677	1	2.46327	0.0013929
KIRP	ENSG00000141497_cg14522800	0.387626	0.365169	1	0.0264654	mSpecific	cg14522800	maleAmplifier	0.0293242	0.135757	1	0.00827697	17	4648566	Body-opensea	ENSG00000141497	ZMYND15	84225	1.77523	0.0158103	2.17508	6.48109e-10
KIRP	ENSG00000151067_cg02468320	0.438392	0.461938	1	4.15129e-07	mSpecific	cg02468320	maleAmplifier	-0.1366	-0.262651	1	9.01381e-21	12	2404134	Body-opensea	ENSG00000151067	CACNA1C	775	-1.89031	1	-2.27755	1.23118e-07
KIRP	ENSG00000152669_cg01286665	0.577749	0.415884	0.65028	0.000202129	mSpecific	cg01286665	maleAmplifier	0.112598	0.189154	1	3.40594e-17	5	54525925	IGR-shore	ENSG00000152669	CCNO	10309	1.84852	1	1.72616	1.14799e-05
KIRP	ENSG00000154102_cg04558424	0.677722	0.643345	0.000518996	0	overlap	cg04558424	maleAmplifier	0.0281131	0.196466	1	0.00345244	16	85743497	Body-island	ENSG00000154102	C16orf74	404550	1.14671	1	1.39396	0.00411553
KIRP	ENSG00000159176_cg27559399	0.309713	0.372841	1	0.013358	mSpecific	cg27559399	maleAmplifier	-0.0815543	-0.16309	1	1.48928e-14	1	201450997	IGR-island	ENSG00000159176	CSRP1	1465	-1.21866	0.0897535	-1.50006	1.147e-08
KIRP	ENSG00000162426_cg03406993	0.502657	0.437395	1	1.80468e-05	mSpecific	cg03406993	maleAmplifier	-0.0647954	-0.174335	1	0.00226768	1	8390708	Body-island	ENSG00000162426	SLC45A1	50651	-1.5299	1	-2.05204	1.29966e-08
KIRP	ENSG00000164330_cg23468002	0.560273	0.460883	1	5.31656e-07	mSpecific	cg23468002	maleAmplifier	-0.153816	-0.214295	0.00959297	1.52561e-19	5	158532401	IGR-island	ENSG00000164330	EBF1	1879	-1.80772	1	-2.51131	1.53383e-09
KIRP	ENSG00000167641_cg23090870	0.383798	0.47572	1	0	mSpecific	cg23090870	maleAmplifier	-0.0711588	-0.148463	1	8.83654e-11	19	38755753	Body-shore	ENSG00000167641	PPP1R14A	94274	-1.60259	1	-2.20359	1.16093e-06
KIRP	ENSG00000168703_cg11626007	0.439097	0.529073	1	0	mSpecific	cg11626007	maleAmplifier	0.114977	0.234955	1	3.63942e-07	20	43743835	TSS200-opensea	ENSG00000168703	WFDC12	128488	1.52898	1	2.76185	0.046572
KIRP	ENSG00000168703_cg12096720	0.230742	0.434693	1	2.49334e-05	mSpecific	cg12096720	maleAmplifier	0.0649102	0.200215	1	0.00101188	20	43743736	1stExon-opensea	ENSG00000168703	WFDC12	128488	1.52898	1	2.76185	0.046572
KIRP	ENSG00000168703_cg02016723	0.380323	0.377341	1	0.00887315	mSpecific	cg02016723	maleAmplifier	0.0290365	0.100271	1	1.98443e-19	20	43743511	Body-opensea	ENSG00000168703	WFDC12	128488	1.52898	1	2.76185	0.046572
KIRP	ENSG00000168703_cg26342637	0.56677	0.667812	1	0	mSpecific	cg26342637	maleAmplifier	0.0646756	0.187041	1	5.53109e-07	20	43743872	TSS200-opensea	ENSG00000168703	WFDC12	128488	1.52898	1	2.76185	0.046572
KIRP	ENSG00000168872_cg08034613	0.452545	0.3789	1	0.00768886	mSpecific	cg08034613	maleAmplifier	0.0421316	0.0852475	1	0.00543315	16	70411455	IGR-shelf	ENSG00000168872	DDX19A	55308	0.499081	0.119953	0.529387	0.000574241
KIRP	ENSG00000175121_cg26342637	0.465236	0.651175	1	0	mSpecific	cg26342637	maleAmplifier	0.0646756	0.187041	1	5.53109e-07	20	43743872	TSS200-opensea	ENSG00000175121	WFDC5	149708	1.45335	1	2.98954	0.0332003
KIRP	ENSG00000175121_cg02016723	0.21936	0.363029	1	0.031927	mSpecific	cg02016723	maleAmplifier	0.0290365	0.100271	1	1.98443e-19	20	43743511	Body-opensea	ENSG00000175121	WFDC5	149708	1.45335	1	2.98954	0.0332003
KIRP	ENSG00000175121_cg12096720	0.194631	0.417911	1	0.000162978	mSpecific	cg12096720	maleAmplifier	0.0649102	0.200215	1	0.00101188	20	43743736	1stExon-opensea	ENSG00000175121	WFDC5	149708	1.45335	1	2.98954	0.0332003
KIRP	ENSG00000175121_cg11626007	0.358263	0.498408	1	0	mSpecific	cg11626007	maleAmplifier	0.114977	0.234955	1	3.63942e-07	20	43743835	TSS200-opensea	ENSG00000175121	WFDC5	149708	1.45335	1	2.98954	0.0332003
KIRP	ENSG00000177731_cg24113784	0.221878	0.41686	1	0.000182275	mSpecific	cg24113784	maleAmplifier	0.0365003	0.0592317	1	2.45685e-24	17	18167599	Body-island	ENSG00000177731	FLII	2314	0.834725	0.0461344	0.928344	5.96196e-09
KIRP	ENSG00000179348_cg06490988	0.602226	0.413831	0.189491	0.000250856	mSpecific	cg06490988	maleAmplifier	-0.107459	-0.199624	1	1.34608e-09	3	128212001	5'UTR-island	ENSG00000179348	GATA2	2624	-3.22676	0.06692	-3.48019	7.9954e-10	P
KIRP	ENSG00000187583_cg23596291	0.570396	0.41828	0.928149	0.000156677	mSpecific	cg23596291	maleAmplifier	0.035661	0.113827	1	4.42105e-09	1	907638	Body-shore	ENSG00000187583	PLEKHN1	84069	2.83669	0.300459	3.27859	8.64879e-10
KIRP	ENSG00000187672_cg11165254	0.247261	0.379815	1	0.00706687	mSpecific	cg11165254	maleAmplifier	0.0855292	0.213886	1	2.92245e-25	3	55736620	Body-opensea	ENSG00000187672	ERC2	26059	1.37869	1	1.37757	1.00786e-05
KIRP	ENSG00000197548_cg15139163	0.12382	0.417713	1	0.000166456	mSpecific	cg15139163	maleAmplifier	0.119846	0.178832	1	2.60259e-28	3	11408424	Body-opensea	ENSG00000197548	ATG7	10533	0.473018	1	0.542679	3.00853e-05
KIRP	ENSG00000205220_cg02564259	0.358465	0.388939	1	0.00300297	mSpecific	cg02564259	maleAmplifier	0.0298849	0.0523981	1	5.98075e-16	16	67978429	3'UTR-opensea	ENSG00000205220	PSMB10	5699	1.03027	1	1.40094	2.87218e-08
KIRP	ENSG00000205277_cg06722630	0.375135	0.457684	1	1.01287e-06	mSpecific	cg06722630	maleAmplifier	0.121116	0.187459	1	4.76085e-32	7	100661996	3'UTR-opensea	ENSG00000205277	MUC12	10071	3.63695	0.883894	5.15929	6.93847e-09
KIRP	ENSG00000213654_cg23177883	0.150764	0.367964	1	0.0206716	mSpecific	cg23177883	maleAmplifier	0.0349559	0.0789882	1	2.18764e-23	6	32150577	Body-opensea	ENSG00000213654	GPSM3	63940	1.37202	1	1.66792	1.21513e-06
THCA	ENSG00000105329_cg11037750	0.491782	0.446371	0	0.0283961	overlap	cg11037750	maleAmplifier	0.193338	0.260615	1.05823e-21	2.50549e-15	19	41837015	Body-island	ENSG00000105329	TGFB1	7040	1.09418	2.04784e-11	1.87042	0.00011932
THCA	ENSG00000184058_cg08886651	0.465234	0.446716	0	0.0276776	overlap	cg08886651	maleAmplifier	-0.0521869	-0.0932331	2.85654e-23	2.87262e-15	22	19743029	TSS1500-island	ENSG00000184058	TBX1	6899	-1.78812	2.36669e-10	-2.31905	0.000236848
HNSC	ENSG00000018280_cg14045814	0.303918	0.283783	1	0.0114958	mSpecific	cg14045814	maleAmplifier	0.187941	0.257738	1.63975e-08	1.04672e-34	2	219267341	Body-shore	ENSG00000018280	SLC11A1	6556	2.36406	0.0613761	2.49652	3.7449e-05
HNSC	ENSG00000069188_cg13699963	0.413559	0.514314	0.513521	0	mSpecific	cg13699963	maleAmplifier	0.162396	0.26547	1	1.36197e-11	17	71548861	Body-opensea	ENSG00000069188	SDK2	54549	1.63836	1	1.80331	0.00655673
HNSC	ENSG00000072422_cg17377263	0.502237	0.518715	0.00067975	0	overlap	cg17377263	maleAmplifier	0.124033	0.251096	1	4.83298e-09	10	62637805	Body-opensea	ENSG00000072422	RHOBTB1	9886	1.22762	0.443218	0.919368	0.00342595
HNSC	ENSG00000106976_cg12558090	0.231479	0.305268	1	0.000851313	mSpecific	cg12558090	maleAmplifier	0.0365806	0.119887	1	0.0105206	9	130979331	Body-shore	ENSG00000106976	DNM1	1759	1.24924	0.893914	1.57043	0.000308515
HNSC	ENSG00000117122_cg21304454	0.369097	0.295398	1	0.00288868	mSpecific	cg21304454	maleAmplifier	0.131122	0.20713	1	1.74183e-15	1	17302859	Body-shelf	ENSG00000117122	MFAP2	4237	3.56446	0.0171173	3.38122	2.55163e-09
HNSC	ENSG00000122691_cg19193956	0.235152	0.280217	1	0.0173552	mSpecific	cg19193956	maleAmplifier	0.164907	0.321187	1	1.17464e-09	7	19148187	IGR-shore	ENSG00000122691	TWIST1	7291	0.894842	1	1.42586	0.0273716
HNSC	ENSG00000123364_cg04819096	0.405979	0.30227	0.829872	0.00123972	mSpecific	cg04819096	maleAmplifier	0.1648	0.247087	0.237541	1.28556e-19	12	54339167	3'UTR-island	ENSG00000123364	HOXC13	3229	1.77354	1	5.81737	4.5128e-05
HNSC	ENSG00000123364_cg05771518	0.345086	0.359197	1	4.48298e-07	mSpecific	cg05771518	maleAmplifier	0.201058	0.274005	0.000177787	3.70804e-25	12	54339288	3'UTR-shore	ENSG00000123364	HOXC13	3229	1.77354	1	5.81737	4.5128e-05
HNSC	ENSG00000128710_cg22674699	0.289083	0.281529	1	0.014924	mSpecific	cg22674699	maleAmplifier	0.347614	0.431337	1.04709e-10	5.35228e-71	2	176987918	1stExon-island	ENSG00000128710	HOXD10	3236	4.26124	1	4.2516	3.63896e-07
HNSC	ENSG00000138944_cg00788760	0.513479	0.303136	0.000225533	0.00111264	overlap	cg00788760	maleAmplifier	0.172199	0.300296	1	3.44373e-12	22	44682494	Body-opensea	ENSG00000138944	KIAA1644	85352	1.64816	1	1.69099	0.00022685
HNSC	ENSG00000144355_cg12762816	0.346479	0.347803	1	2.54502e-06	mSpecific	cg12762816	maleAmplifier	0.0629589	0.137313	1	0.000290625	2	172953392	3'UTR-shore	ENSG00000144355	DLX1	1745	2.31646	1	3.55669	4.2375e-07
HNSC	ENSG00000144355_cg15552158	0.384557	0.492637	1	0	mSpecific	cg15552158	maleAmplifier	0.0882922	0.169807	1	0.000355088	2	172953270	3'UTR-shore	ENSG00000144355	DLX1	1745	2.31646	1	3.55669	4.2375e-07
HNSC	ENSG00000146555_cg14791502	0.289174	0.400755	1	0	mSpecific	cg14791502	maleAmplifier	0.0789864	0.192891	1	4.25313e-06	7	4243368	Body-opensea	ENSG00000146555	SDK1	221935	1.74562	1	1.68137	0.0146194
HNSC	ENSG00000146555_cg10741603	0.277425	0.323558	1	7.83709e-05	mSpecific	cg10741603	maleAmplifier	0.0357104	0.132746	1	4.76486e-08	7	4243604	Body-opensea	ENSG00000146555	SDK1	221935	1.74562	1	1.68137	0.0146194
HNSC	ENSG00000162849_cg15896560	0.200198	0.281124	1	0.015637	mSpecific	cg15896560	maleAmplifier	0.0590675	0.172149	1	1.72022e-05	1	245867618	IGR-opensea	ENSG00000162849	KIF26B	55083	2.09608	0.0227551	2.95967	2.89523e-08
HNSC	ENSG00000163064_cg02958634	0.42667	0.434205	0.218021	0	mSpecific	cg02958634	maleAmplifier	0.170274	0.274807	1	4.74269e-17	2	119594696	IGR-shore	ENSG00000163064	EN1	2019	5.71621	1	5.03845	3.14402e-05
HNSC	ENSG00000163064_cg22548438	0.316815	0.333216	1	2.07991e-05	mSpecific	cg22548438	maleAmplifier	0.217708	0.306075	0.000225159	6.80339e-32	2	119607636	IGR-island	ENSG00000163064	EN1	2019	5.71621	1	5.03845	3.14402e-05
HNSC	ENSG00000163064_cg03726556	0.256216	0.334504	1	1.73628e-05	mSpecific	cg03726556	maleAmplifier	0.137968	0.23063	1	4.14591e-24	2	119607379	IGR-island	ENSG00000163064	EN1	2019	5.71621	1	5.03845	3.14402e-05
HNSC	ENSG00000163064_cg12507795	0.458255	0.354622	0.023873	9.10656e-07	overlap	cg12507795	maleAmplifier	0.113459	0.189795	1	4.59085e-13	2	119611880	IGR-island	ENSG00000163064	EN1	2019	5.71621	1	5.03845	3.14402e-05
HNSC	ENSG00000163064_cg14228146	0.160989	0.296358	1	0.00256996	mSpecific	cg14228146	maleAmplifier	0.155906	0.222241	0.00463591	7.43286e-28	2	119607395	IGR-island	ENSG00000163064	EN1	2019	5.71621	1	5.03845	3.14402e-05
HNSC	ENSG00000164651_cg14031365	0.394192	0.433703	1	0	mSpecific	cg14031365	maleAmplifier	0.0902708	0.244128	1	9.7348e-09	7	20816695	IGR-shore	ENSG00000164651	SP8	221833	2.98213	1	2.81729	0.034196
HNSC	ENSG00000164651_cg23243400	0.210954	0.272037	1	0.0437206	mSpecific	cg23243400	maleAmplifier	0.127533	0.230266	1	4.18235e-19	7	20818844	IGR-shore	ENSG00000164651	SP8	221833	2.98213	1	2.81729	0.034196
HNSC	ENSG00000164651_cg15087860	0.274943	0.357635	1	5.72107e-07	mSpecific	cg15087860	maleAmplifier	0.0537944	0.22134	1	1.95315e-10	7	20816253	IGR-island	ENSG00000164651	SP8	221833	2.98213	1	2.81729	0.034196
HNSC	ENSG00000166033_cg05723130	0.0565526	0.283869	1	0.0113804	mSpecific	cg05723130	maleAmplifier	0.151845	0.232468	0.00975933	2.01025e-16	10	124248994	Body-opensea	ENSG00000166033	HTRA1	5654	1.81029	1	2.45226	1.41743e-05
HNSC	ENSG00000168477_cg14737484	0.281978	0.42468	1	0	mSpecific	cg14737484	maleAmplifier	-0.292512	-0.370648	5.48248e-13	2.49531e-35	6	32054561	Body-shore	ENSG00000168477	TNXB	7148	-0.970285	1	-1.78134	0.000132394
HNSC	ENSG00000168477_cg04147642	0.275952	0.425653	1	0	mSpecific	cg04147642	maleAmplifier	-0.142066	-0.195776	1.84201e-06	3.28841e-31	6	32054659	Body-shore	ENSG00000168477	TNXB	7148	-0.970285	1	-1.78134	0.000132394
HNSC	ENSG00000171811_cg24626659	0.22494	0.293144	1	0.00379475	mSpecific	cg24626659	maleAmplifier	-0.0725161	-0.187018	1	6.57404e-10	10	134754286	Body-shore	ENSG00000171811	CFAP46	54777	-1.9613	1	-2.31873	0.00102755
HNSC	ENSG00000187720_cg05739476	0.299044	0.316836	1	0.000191891	mSpecific	cg05739476	maleAmplifier	-0.195387	-0.321223	1	2.00418e-16	15	72072813	3'UTR-opensea	ENSG00000187720	THSD4	79875	-2.01486	1	-1.83466	6.86471e-05
HNSC	ENSG00000189420_cg01467086	-0.0793253	0.274984	1	0.0314489	mSpecific	cg01467086	maleAmplifier	0.0494982	0.083381	1	6.55226e-15	X	152686726	Body-island	ENSG00000189420	ZFP92	139735	2.04811	1	2.64998	1.09677e-08
