# Supplementary material for: Attenuated sex-related DNA methylation differences in cancer highlight the magnitude bias mediating existing disparities
Source: Biol Sex Differ. 2024 Dec 23;15:106. doi: 10.1186/s13293-024-00682-4 (PMC11664931; doi:10.1186/s13293-024-00682-4)
Supplement: Supplementary file 20 — Supplementary material 20. [file 13293_2024_682_MOESM20_ESM.xlsx]

## Sheet: female
Cancer	Term	pvalue	p.adjust	geneID
COAD	GO_BP_response_to_lithium_ion_(GO:0010226)	0.00505552	0.044673	2185
COAD	GO_BP_sprouting_angiogenesis_(GO:0002040)	0.00597242	0.044673	2185
COAD	GO_BP_negative_regulation_of_bone_mineralization_(GO:0030502)	0.0064306	0.044673	2185
COAD	GO_BP_oocyte_maturation_(GO:0001556)	0.0064306	0.044673	2185
COAD	GO_BP_bone_resorption_(GO:0045453)	0.00734644	0.044673	2185
COAD	GO_BP_positive_regulation_of_cell-matrix_adhesion_(GO:0001954)	0.00734644	0.044673	2185
COAD	GO_BP_focal_adhesion_assembly_(GO:0048041)	0.00780409	0.044673	2185
COAD	GO_BP_response_to_osmotic_stress_(GO:0006970)	0.00780409	0.044673	2185
COAD	SA_PTEN_PATHWAY	0.00780409	0.044673	2185
COAD	GO_BP_response_to_cocaine_(GO:0042220)	0.00826157	0.044673	2185
COAD	GO_BP_gastrulation_with_mouth_forming_second_(GO:0001702)	0.00963295	0.044673	26011
COAD	GO_BP_positive_regulation_of_JUN_kinase_activity_(GO:0043507)	0.00963295	0.044673	2185
COAD	GO_BP_positive_regulation_of_reactive_oxygen_species_metabolic_process_(GO:2000379)	0.0100897	0.044673	2185
COAD	GO_BP_positive_regulation_of_actin_filament_polymerization_(GO:0030838)	0.0105463	0.044673	2185
COAD	GO_BP_positive_regulation_of_phosphatidylinositol_3-kinase_activity_(GO:0043552)	0.0105463	0.044673	2185
COAD	GO_BP_vascular_endothelial_growth_factor_receptor_signaling_pathway_(GO:0048010)	0.011459	0.044673	2185
COAD	GO_BP_fatty_acid_beta-oxidation_(GO:0006635)	0.012371	0.044673	1892
COAD	GO_BP_tumor_necrosis_factor-mediated_signaling_pathway_(GO:0033209)	0.012371	0.044673	2185
COAD	GO_BP_actin_filament_organization_(GO:0007015)	0.0141928	0.0459649	2185
COAD	GO_BP_response_to_organic_nitrogen_(GO:0010243)	0.0141928	0.0459649	2185
COAD	GO_BP_positive_regulation_of_protein_kinase_activity_(GO:0045860)	0.0151027	0.0459649	2185
COAD	GO_BP_positive_regulation_of_translation_(GO:0045727)	0.0155574	0.0459649	2185
COAD	GO_BP_positive_regulation_of_anti-apoptosis_(GO:0045768)	0.0178281	0.046838	2185
COAD	GO_BP_regulation_of_cell_adhesion_(GO:0030155)	0.0182817	0.046838	2185
COAD	GO_BP_response_to_hydrogen_peroxide_(GO:0042542)	0.0182817	0.046838	2185
COAD	GO_BP_positive_regulation_of_neuron_projection_development_(GO:0010976)	0.0187352	0.046838	2185
COAD	GO_BP_response_to_mechanical_stimulus_(GO:0009612)	0.0205472	0.047824	2185
COAD	GO_BP_cellular_response_to_retinoic_acid_(GO:0071300)	0.0209998	0.047824	2185
COAD	GO_BP_response_to_cAMP_(GO:0051591)	0.0219044	0.047824	2185
COAD	GO_BP_positive_regulation_of_JNK_cascade_(GO:0046330)	0.0223565	0.047824	2185
COAD	GO_BP_peptidyl-tyrosine_phosphorylation_(GO:0018108)	0.0228084	0.047824	2185
COAD	GO_BP_response_to_calcium_ion_(GO:0051592)	0.024163	0.049081	2185
COAD	GO_BP_response_to_hormone_stimulus_(GO:0009725)	0.0250652	0.0493708	2185
COAD	GO_BP_positive_regulation_of_cell_growth_(GO:0030307)	0.0268675	0.0513643	2185
COAD	GO_BP_positive_regulation_of_peptidyl-tyrosine_phosphorylation_(GO:0050731)	0.0282174	0.0524037	2185
COAD	GO_BP_integrin-mediated_signaling_pathway_(GO:0007229)	0.0295657	0.0533826	2185
COAD	GO_BP_response_to_glucose_stimulus_(GO:0009749)	0.0304638	0.0535174	2185
COAD	GO_BP_MAPK_cascade_(GO:0000165)	0.0318095	0.054411	2185
COAD	GO_BP_fatty_acid_metabolic_process_(GO:0006631)	0.0327058	0.0545097	1892
COAD	GO_BP_positive_regulation_of_ERK1_and_ERK2_cascade_(GO:0070374)	0.034049	0.0553296	2185
COAD	GO_BP_response_to_ethanol_(GO:0045471)	0.0385149	0.0610602	2185
COAD	GO_BP_regulation_of_cell_shape_(GO:0008360)	0.0416308	0.0644287	2185
COAD	GO_BP_elevation_of_cytosolic_calcium_ion_concentration_(GO:0007204)	0.0429637	0.0647804	2185
COAD	HALLMARK_INTERFERON_ALPHA_RESPONSE	0.0438513	0.0647804	9830
COAD	HALLMARK_ANDROGEN_RESPONSE	0.0451816	0.0650955	2185
COAD	GO_BP_positive_regulation_of_cell_migration_(GO:0030335)	0.0460676	0.0650955	2185
KIRC	GO_BP_response_to_insulin_stimulus_(GO:0032868)	0.000128573	0.00257147	2887/3291
KIRC	GO_BP_insulin-like_growth_factor_receptor_signaling_pathway_(GO:0048009)	0.00367914	0.0218669	2887
KIRC	GO_BP_positive_regulation_of_vascular_endothelial_growth_factor_receptor_signaling_pathway_(GO:0030949)	0.00490327	0.0218669	2887
KIRC	GO_BP_negative_regulation_of_insulin_receptor_signaling_pathway_(GO:0046627)	0.00643183	0.0218669	2887
KIRC	GO_BP_response_to_steroid_hormone_stimulus_(GO:0048545)	0.00673733	0.0218669	3291
KIRC	GO_BP_negative_regulation_of_phosphorylation_(GO:0042326)	0.00765342	0.0218669	2887
KIRC	GO_BP_positive_regulation_of_phosphorylation_(GO:0042327)	0.00765342	0.0218669	2887
KIRC	GO_BP_negative_regulation_of_Wnt_receptor_signaling_pathway_(GO:0030178)	0.00948368	0.0237092	2887
KIRC	GO_BP_induction_of_apoptosis_by_intracellular_signals_(GO:0008629)	0.0134406	0.0298679	85329
KIRC	GO_BP_female_pregnancy_(GO:0007565)	0.0219228	0.0438456	3291
KIRC	GO_BP_response_to_glucocorticoid_stimulus_(GO:0051384)	0.0249389	0.0453434	3291
KIRC	HALLMARK_PEROXISOME	0.0315497	0.0499209	3291
KIRC	GO_BP_leukocyte_migration_(GO:0050900)	0.0324486	0.0499209	140885
KIRC	GO_BP_insulin_receptor_signaling_pathway_(GO:0008286)	0.0422948	0.0604212	2887
LIHC	GO_BP_carbohydrate_transport_(GO:0008643)	0.00780828	0.0384696	50651
LIHC	GO_BP_negative_regulation_of_endopeptidase_activity_(GO:0010951)	0.0153479	0.0384696	5858
LIHC	GO_BP_female_pregnancy_(GO:0007565)	0.016487	0.0384696	5858
LUAD	GO_BP_in_utero_embryonic_development_(GO:0001701)	4.20065e-05	0.00441068	7075/6926/4487/57493
LUAD	GO_BP_palate_development_(GO:0060021)	0.0023221	0.084016	6926/4487
LUAD	GO_BP_response_to_wounding_(GO:0009611)	0.00240046	0.084016	7450/10894
LUAD	GO_BP_anterior/posterior_axis_specification,_embryo_(GO:0008595)	0.0122159	0.0971892	6926
LUAD	GO_BP_positive_regulation_of_DNA_damage_response,_signal_transduction_by_p53_class_mediator_(GO:0043517)	0.0122159	0.0971892	4487
LUAD	GO_BP_response_to_selenium_ion_(GO:0010269)	0.0122159	0.0971892	2878
LUAD	GO_BP_branching_involved_in_mammary_gland_duct_morphogenesis_(GO:0060444)	0.0146423	0.0971892	6926
LUAD	HALLMARK_UV_RESPONSE_UP	0.0156839	0.0971892	4487/2878
LUAD	GO_BP_ventricular_septum_morphogenesis_(GO:0060412)	0.0158533	0.0971892	6926
LUAD	GO_BP_signal_transduction_involved_in_regulation_of_gene_expression_(GO:0023019)	0.017063	0.0971892	4487
LUAD	GO_BP_ventricular_septum_development_(GO:0003281)	0.017063	0.0971892	57493
LUAD	GO_BP_stem_cell_differentiation_(GO:0048863)	0.0182713	0.0971892	4487
LUAD	GO_BP_stem_cell_maintenance_(GO:0019827)	0.0182713	0.0971892	6926
LUAD	GO_BP_bone_morphogenesis_(GO:0060349)	0.0206837	0.0971892	4487
LUAD	GO_BP_middle_ear_morphogenesis_(GO:0042474)	0.0206837	0.0971892	4487
LUAD	GO_BP_blood_coagulation,_intrinsic_pathway_(GO:0007597)	0.0218878	0.0971892	7450
LUAD	GO_BP_hydrogen_peroxide_catabolic_process_(GO:0042744)	0.0218878	0.0971892	2878
LUAD	GO_BP_male_genitalia_development_(GO:0030539)	0.0218878	0.0971892	6926
LUAD	GO_BP_cellular_process_(GO:0009987)	0.0230905	0.0971892	3068
LUAD	GO_BP_protein_localization_to_nucleus_(GO:0034504)	0.0230905	0.0971892	4487
LUAD	GO_BP_regulation_of_phosphorylation_(GO:0042325)	0.0230905	0.0971892	94274
LUAD	HALLMARK_INTERFERON_GAMMA_RESPONSE	0.0244225	0.0971892	3959/81030
LUAD	GO_BP_platelet_activation_(GO:0030168)	0.0255709	0.0971892	6915/7450
LUAD	GO_BP_embryonic_forelimb_morphogenesis_(GO:0035115)	0.0278875	0.0971892	4487
LUAD	GO_BP_response_to_corticosterone_stimulus_(GO:0051412)	0.0278875	0.0971892	2878
LUAD	GO_BP_epithelial_to_mesenchymal_transition_(GO:0001837)	0.0290833	0.0971892	4487
LUAD	GO_BP_positive_regulation_of_cell_cycle_(GO:0045787)	0.0290833	0.0971892	6926
LUAD	GO_BP_cell_aging_(GO:0007569)	0.0302778	0.0971892	6926
LUAD	GO_BP_embryonic_hindlimb_morphogenesis_(GO:0035116)	0.0302778	0.0971892	4487
LUAD	GO_BP_face_morphogenesis_(GO:0060325)	0.0302778	0.0971892	4487
LUAD	GO_BP_midbrain_development_(GO:0030901)	0.0302778	0.0971892	4487
LUAD	GO_BP_outflow_tract_morphogenesis_(GO:0003151)	0.0302778	0.0971892	6926
LUAD	GO_BP_mammary_gland_development_(GO:0030879)	0.0314708	0.0971892	6926
LUAD	GO_BP_placenta_development_(GO:0001890)	0.0314708	0.0971892	7450
LUAD	GO_BP_positive_regulation_of_BMP_signaling_pathway_(GO:0030513)	0.0326625	0.0979874	4487
LUAD	GO_BP_mesoderm_development_(GO:0007498)	0.0386002	0.112584	7075
LUAD	GO_BP_glutathione_metabolic_process_(GO:0006749)	0.0409657	0.116254	2878
LUAD	GO_BP_heart_morphogenesis_(GO:0003007)	0.0433258	0.116646	4487
LUAD	HALLMARK_ANGIOGENESIS	0.0433258	0.116646	4487
LUAD	GO_BP_embryonic_digit_morphogenesis_(GO:0042733)	0.0456804	0.119911	6926
LUAD	GO_BP_multicellular_organism_growth_(GO:0035264)	0.0468557	0.119996	57493
LUAD	GO_BP_heart_looping_(GO:0001947)	0.0480296	0.120074	6926
THCA	GO_BP_cell_communication_(GO:0007154)	4.40719e-05	0.000484791	2701/2707
THCA	GO_BP_cell-cell_junction_assembly_(GO:0007043)	0.00184113	0.00731308	2701
THCA	GO_BP_response_to_pain_(GO:0048265)	0.00199448	0.00731308	2701
THCA	GO_BP_placenta_development_(GO:0001890)	0.00398696	0.0109641	2707
THCA	GO_BP_skin_development_(GO:0043588)	0.00643652	0.0132025	2707
THCA	GO_BP_blood_vessel_development_(GO:0001568)	0.00720139	0.0132025	2701
THCA	GO_BP_calcium_ion_transport_(GO:0006816)	0.0122421	0.0192376	2701
THCA	GO_BP_sensory_perception_of_sound_(GO:0007605)	0.0157478	0.0216532	2707
THCA	GO_BP_in_utero_embryonic_development_(GO:0001701)	0.0254699	0.0311298	2707
THCA	HALLMARK_ESTROGEN_RESPONSE_LATE	0.030464	0.0335103	2707
THCA	GO_BP_cell-cell_signaling_(GO:0007267)	0.0366509	0.0366509	2701

## Sheet: male
Cancer	Term	pvalue	p.adjust	geneID
COAD	GO_BP_nucleobase-containing_compound_metabolic_process_(GO:0006139)	0.00142585	0.0282018	4940/4939
COAD	GO_BP_type_I_interferon-mediated_signaling_pathway_(GO:0060337)	0.00156596	0.0282018	4940/4939
COAD	GO_BP_interferon-gamma-mediated_signaling_pathway_(GO:0060333)	0.00176261	0.0282018	4940/4939
COAD	GO_BP_regulation_of_transcription_elongation,_DNA-dependent_(GO:0032784)	0.0100878	0.072294	6920
COAD	GO_BP_neurotransmitter_biosynthetic_process_(GO:0042136)	0.0110002	0.072294	4128
COAD	GO_BP_intracellular_steroid_hormone_receptor_signaling_pathway_(GO:0030518)	0.0137329	0.072294	2852
COAD	HALLMARK_INTERFERON_GAMMA_RESPONSE	0.0139827	0.072294	4940/4939
COAD	GO_BP_negative_regulation_of_viral_genome_replication_(GO:0045071)	0.0146423	0.072294	4940
COAD	GO_BP_purine_nucleotide_biosynthetic_process_(GO:0006164)	0.0164587	0.072294	4939
COAD	GO_BP_RNA_catabolic_process_(GO:0006401)	0.0164587	0.072294	4939
COAD	GO_BP_cytokine-mediated_signaling_pathway_(GO:0019221)	0.0171894	0.072294	4940/4939
COAD	GO_BP_regulation_of_transcription_from_RNA_polymerase_II_promoter_(GO:0006357)	0.0180735	0.072294	23125/6920
COAD	GO_BP_negative_regulation_of_DNA_replication_(GO:0008156)	0.0200822	0.0741498	345643
COAD	GO_BP_endosome_to_lysosome_transport_(GO:0008333)	0.0218894	0.0750495	83547
COAD	GO_BP_regulation_of_mitotic_cell_cycle_(GO:0007346)	0.0254947	0.081583	345643
COAD	GO_BP_behavior_(GO:0007610)	0.0290877	0.0871898	4128
COAD	GO_BP_base-excision_repair_(GO:0006284)	0.0308797	0.0871898	10309
COAD	GO_BP_gluconeogenesis_(GO:0006094)	0.0389061	0.0955057	2023
COAD	GO_BP_glycolysis_(GO:0006096)	0.0397942	0.0955057	2023
COAD	GO_BP_immune_response_(GO:0006955)	0.0429057	0.0955057	4940/4939
COAD	GO_BP_defense_response_to_virus_(GO:0051607)	0.0433389	0.0955057	4940
COAD	GO_BP_neurotransmitter_secretion_(GO:0007269)	0.0442232	0.0955057	4128
COAD	GO_BP_cilium_assembly_(GO:0042384)	0.0459895	0.0955057	345643
COAD	GO_BP_regulation_of_cyclin-dependent_protein_kinase_activity_(GO:0000079)	0.0477529	0.0955057	10309
HNSC	GO_BP_proximal/distal_pattern_formation_(GO:0009954)	5.35116e-07	0.000141271	3236/1745/2019/221833
HNSC	GO_BP_ventricular_septum_development_(GO:0003281)	0.000816915	0.106629	64220/8543
HNSC	GO_BP_embryonic_forelimb_morphogenesis_(GO:0035115)	0.00223188	0.106629	7291/2019
HNSC	GO_BP_cell_aging_(GO:0007569)	0.00263626	0.106629	3383/23636
HNSC	GO_BP_embryonic_hindlimb_morphogenesis_(GO:0035116)	0.00263626	0.106629	5307/7291
HNSC	GO_BP_anatomical_structure_morphogenesis_(GO:0009653)	0.00305128	0.106629	5307/3229/2019
HNSC	HALLMARK_ALLOGRAFT_REJECTION	0.00319543	0.106629	586/3383/1445/3624
HNSC	GO_BP_mitotic_cell_cycle_spindle_assembly_checkpoint_(GO:0007094)	0.00378573	0.106629	8379/7324
HNSC	GO_BP_odontogenesis_(GO:0042476)	0.00378573	0.106629	2065/3624
HNSC	GO_BP_hair_follicle_development_(GO:0001942)	0.00403898	0.106629	3624/3229
HNSC	GO_BP_dorsal/ventral_pattern_formation_(GO:0009953)	0.00456848	0.109644	2019/221833
HNSC	GO_BP_embryonic_limb_morphogenesis_(GO:0030326)	0.0057181	0.120856	3236/221833
HNSC	GO_BP_cellular_response_to_hypoxia_(GO:0071456)	0.00633748	0.120856	3383/7291
HNSC	GO_BP_post-Golgi_vesicle-mediated_transport_(GO:0006892)	0.00698608	0.120856	8775/10066
HNSC	GO_BP_ovarian_follicle_development_(GO:0001541)	0.00732122	0.120856	3383/3624
HNSC	GO_BP_skeletal_system_development_(GO:0001501)	0.00732458	0.120856	5307/3236/2019
HNSC	GO_BP_skeletal_muscle_tissue_development_(GO:0007519)	0.00836949	0.129973	2065/3236
HNSC	GO_BP_neural_tube_closure_(GO:0001843)	0.0106548	0.156271	8543/7291
HNSC	GO_BP_cell_surface_receptor_signaling_pathway_(GO:0007166)	0.0139815	0.18202	2872/3624/23636
HNSC	GO_BP_wound_healing_(GO:0042060)	0.0169196	0.18202	2065/6556
HNSC	NABA_ECM_GLYCOPROTEINS	0.0220232	0.18202	4237/7148/79875
HNSC	GO_BP_negative_regulation_of_neuron_apoptosis_(GO:0043524)	0.0232589	0.18202	2065/1745
HNSC	GO_BP_viral_transcription_(GO:0019083)	0.0261469	0.18202	6206/6159
HNSC	GO_BP_translational_termination_(GO:0006415)	0.0285569	0.18202	6206/6159
HNSC	GO_BP_apical_protein_localization_(GO:0045176)	0.0302881	0.18202	8775
HNSC	GO_BP_cellular_response_to_cholesterol_(GO:0071397)	0.0302881	0.18202	3624
HNSC	GO_BP_diaphragm_development_(GO:0060539)	0.0302881	0.18202	64220
HNSC	GO_BP_histone_monoubiquitination_(GO:0010390)	0.0302881	0.18202	7324
HNSC	GO_BP_mammary_gland_involution_(GO:0060056)	0.0302881	0.18202	2065
HNSC	GO_BP_mitotic_anaphase_(GO:0000090)	0.0302881	0.18202	8379
HNSC	GO_BP_negative_regulation_of_DNA_damage_response,_signal_transduction_by_p53_class_mediator_(GO:0043518)	0.0302881	0.18202	7291
HNSC	GO_BP_anterior/posterior_pattern_specification_(GO:0009952)	0.0304209	0.18202	3229/3236
HNSC	GO_BP_cytokine-mediated_signaling_pathway_(GO:0019221)	0.030712	0.18202	3383/7324/23636
HNSC	GO_BP_viral_infectious_cycle_(GO:0019058)	0.0316899	0.18202	6206/6159
HNSC	GO_BP_cellular_aldehyde_metabolic_process_(GO:0006081)	0.0332672	0.18202	224
HNSC	GO_BP_ear_development_(GO:0043583)	0.0332672	0.18202	64220
HNSC	GO_BP_head_development_(GO:0060322)	0.0332672	0.18202	64220
HNSC	GO_BP_hemopoietic_progenitor_cell_differentiation_(GO:0002244)	0.0332672	0.18202	3624
HNSC	GO_BP_negative_regulation_of_oligodendrocyte_differentiation_(GO:0048715)	0.0332672	0.18202	1745
HNSC	GO_BP_respiratory_burst_(GO:0045730)	0.0332672	0.18202	6556
HNSC	GO_BP_translational_elongation_(GO:0006414)	0.0336322	0.18202	6206/6159
HNSC	HALLMARK_PROTEIN_SECRETION	0.0349526	0.18202	8775/9805
HNSC	GO_BP_mRNA_stabilization_(GO:0048255)	0.0362374	0.18202	6556
HNSC	GO_BP_pseudouridine_synthesis_(GO:0001522)	0.0362374	0.18202	126789
HNSC	GO_BP_spinal_cord_association_neuron_differentiation_(GO:0021527)	0.0362374	0.18202	8543
HNSC	GO_BP_sulfur_compound_metabolic_process_(GO:0006790)	0.0362374	0.18202	56548
HNSC	GO_BP_mitotic_cell_cycle_checkpoint_(GO:0007093)	0.0391988	0.18202	8379
HNSC	GO_BP_positive_regulation_of_ATPase_activity_(GO:0032781)	0.0391988	0.18202	9104
HNSC	GO_BP_positive_regulation_of_protein_tyrosine_kinase_activity_(GO:0061098)	0.0391988	0.18202	2065
HNSC	GO_BP_regulation_of_bone_mineralization_(GO:0030500)	0.0391988	0.18202	7291
HNSC	GO_BP_smooth_muscle_tissue_development_(GO:0048745)	0.0391988	0.18202	64220
HNSC	GO_BP_positive_regulation_of_gene_expression_(GO:0010628)	0.0397297	0.18202	6556/7291
HNSC	GO_BP_SRP-dependent_cotranslational_protein_targeting_to_membrane_(GO:0006614)	0.041138	0.18202	6206/6159
HNSC	GO_BP_iron_ion_transport_(GO:0006826)	0.0421512	0.18202	6556
HNSC	GO_BP_synaptic_transmission,_glutamatergic_(GO:0035249)	0.0421512	0.18202	8775
HNSC	GO_BP_cellular_response_to_glucose_stimulus_(GO:0071333)	0.0450948	0.18202	3383
HNSC	GO_BP_defense_response_to_Gram-negative_bacterium_(GO:0050829)	0.0450948	0.18202	6556
HNSC	GO_BP_digestive_tract_morphogenesis_(GO:0048546)	0.0450948	0.18202	64220
HNSC	GO_BP_embryonic_digestive_tract_development_(GO:0048566)	0.0450948	0.18202	64220
HNSC	GO_BP_N-acetylglucosamine_metabolic_process_(GO:0006044)	0.0450948	0.18202	56548
HNSC	GO_BP_positive_regulation_of_cytokine_production_(GO:0001819)	0.0450948	0.18202	6556
HNSC	GO_BP_positive_regulation_of_erythrocyte_differentiation_(GO:0045648)	0.0450948	0.18202	3624
HNSC	GO_BP_response_to_copper_ion_(GO:0046688)	0.0450948	0.18202	3383
HNSC	GO_BP_cognition_(GO:0050890)	0.0480296	0.18202	64220
HNSC	GO_BP_phosphatidylinositol_3-kinase_cascade_(GO:0014065)	0.0480296	0.18202	2065
KIRC	GO_BP_positive_regulation_of_endothelial_cell_migration_(GO:0010595)	0.00151195	0.150557	949/8829
KIRC	GO_BP_embryonic_skeletal_system_morphogenesis_(GO:0048704)	0.00298433	0.150557	3202/3204
KIRC	GO_BP_generation_of_precursor_metabolites_and_energy_(GO:0006091)	0.00552558	0.150557	5256/5467
KIRC	GO_BP_response_to_wounding_(GO:0009611)	0.0072981	0.150557	8829/5460
KIRC	GO_BP_wound_healing_(GO:0042060)	0.00851978	0.150557	949/5467
KIRC	HALLMARK_MYOGENESIS	0.00879811	0.150557	6678/8082/9659
KIRC	GO_BP_regulation_of_transcription_from_RNA_polymerase_II_promoter_(GO:0006357)	0.0126955	0.150557	10553/5467/5460
KIRC	GO_BP_anterior/posterior_pattern_specification_(GO:0009952)	0.0155398	0.150557	3202/3204
KIRC	GO_BP_glucose_metabolic_process_(GO:0006006)	0.0175789	0.150557	5256/5467
KIRC	HALLMARK_PROTEIN_SECRETION	0.0179293	0.150557	858/8082
KIRC	GO_BP_cell_migration_(GO:0016477)	0.0204645	0.150557	8829/3202
KIRC	GO_BP_negative_regulation_of_cell-matrix_adhesion_(GO:0001953)	0.0212895	0.150557	3204
KIRC	GO_BP_positive_regulation_of_triglyceride_biosynthetic_process_(GO:0010867)	0.0212895	0.150557	949
KIRC	GO_BP_cellular_aldehyde_metabolic_process_(GO:0006081)	0.0233943	0.150557	501
KIRC	GO_BP_cholesterol_catabolic_process_(GO:0006707)	0.0233943	0.150557	949
KIRC	GO_BP_endoplasmic_reticulum_organization_(GO:0007029)	0.0233943	0.150557	858
KIRC	GO_BP_epithelial_tube_branching_involved_in_lung_morphogenesis_(GO:0060441)	0.0233943	0.150557	3202
KIRC	GO_BP_positive_regulation_of_nitric-oxide_synthase_activity_(GO:0051000)	0.0233943	0.150557	949
KIRC	GO_BP_skeletal_muscle_fiber_development_(GO:0048741)	0.0233943	0.150557	858
KIRC	GO_BP_androgen_biosynthetic_process_(GO:0006702)	0.0254947	0.150557	949
KIRC	GO_BP_endothelial_cell_proliferation_(GO:0001935)	0.0254947	0.150557	949
KIRC	GO_BP_keratinocyte_proliferation_(GO:0043616)	0.0254947	0.150557	5467
KIRC	GO_BP_phospholipid_transport_(GO:0015914)	0.0254947	0.150557	949
KIRC	GO_BP_positive_regulation_of_smooth_muscle_cell_migration_(GO:0014911)	0.0254947	0.150557	8829
KIRC	GO_BP_response_to_lead_ion_(GO:0010288)	0.0254947	0.150557	6678
KIRC	GO_BP_axonal_fasciculation_(GO:0007413)	0.0275907	0.150557	8829
KIRC	GO_BP_mammary_gland_epithelial_cell_differentiation_(GO:0060644)	0.0275907	0.150557	3202
KIRC	GO_BP_morphogenesis_of_an_epithelium_(GO:0002009)	0.0275907	0.150557	3202
KIRC	GO_BP_semaphorin-plexin_signaling_pathway_(GO:0071526)	0.0275907	0.150557	8829
KIRC	GO_BP_high-density_lipoprotein_particle_remodeling_(GO:0034375)	0.0296824	0.150557	949
KIRC	GO_BP_steroid_hormone_mediated_signaling_pathway_(GO:0043401)	0.0296824	0.150557	5467
KIRC	GO_BP_adipose_tissue_development_(GO:0060612)	0.0317697	0.150557	5467
KIRC	GO_BP_antigen_processing_and_presentation_of_peptide_or_polysaccharide_antigen_via_MHC_class_II_(GO:0002504)	0.0317697	0.150557	3115
KIRC	GO_BP_mammary_gland_alveolus_development_(GO:0060749)	0.0317697	0.150557	3202
KIRC	GO_BP_stem_cell_differentiation_(GO:0048863)	0.0317697	0.150557	3204
KIRC	GO_BP_embryonic_hemopoiesis_(GO:0035162)	0.0338528	0.150557	10019
KIRC	GO_BP_triglyceride_homeostasis_(GO:0070328)	0.0338528	0.150557	949
KIRC	GO_BP_decidualization_(GO:0046697)	0.0359315	0.150557	5467
KIRC	GO_BP_regulation_of_mitosis_(GO:0007088)	0.0359315	0.150557	858
KIRC	GO_BP_reverse_cholesterol_transport_(GO:0043691)	0.0359315	0.150557	949
KIRC	GO_BP_chromosome_organization_(GO:0051276)	0.0380058	0.150557	53918
KIRC	GO_BP_glycogen_catabolic_process_(GO:0005980)	0.0380058	0.150557	5256
KIRC	GO_BP_iron_ion_homeostasis_(GO:0055072)	0.0380058	0.150557	81855
KIRC	GO_BP_thyroid_gland_development_(GO:0030878)	0.0380058	0.150557	3202
KIRC	GO_BP_blastocyst_development_(GO:0001824)	0.0400759	0.150557	5460
KIRC	GO_BP_cellular_process_(GO:0009987)	0.0400759	0.150557	7512
KIRC	GO_BP_response_to_cadmium_ion_(GO:0046686)	0.0400759	0.150557	6678
KIRC	GO_BP_heart_development_(GO:0007507)	0.0404381	0.150557	8829/6678
KIRC	GO_BP_platelet-derived_growth_factor_receptor_signaling_pathway_(GO:0048008)	0.0421417	0.150557	8829
KIRC	GO_BP_positive_regulation_of_fat_cell_differentiation_(GO:0045600)	0.0421417	0.150557	5467
KIRC	GO_BP_cholesterol_efflux_(GO:0033344)	0.0442032	0.150557	949
KIRC	GO_BP_positive_regulation_of_vasoconstriction_(GO:0045907)	0.0442032	0.150557	3269
KIRC	GO_BP_dendrite_development_(GO:0016358)	0.0462604	0.150557	8829
KIRC	GO_BP_negative_regulation_of_endothelial_cell_proliferation_(GO:0001937)	0.0462604	0.150557	858
KIRC	GO_BP_regulation_of_angiogenesis_(GO:0045765)	0.0462604	0.150557	10553
KIRP	GO_BP_peptidyl-tyrosine_phosphorylation_(GO:0018108)	0.000453793	0.0585621	695/3595/5777/5159
KIRP	GO_BP_muscle_contraction_(GO:0006936)	0.000580892	0.0585621	59/7169/3757/6442/2314
KIRP	HALLMARK_EPITHELIAL_MESENCHYMAL_TRANSITION	0.0005991	0.0585621	822/59/5159/7057/6876/7169/960
KIRP	HALLMARK_MYOGENESIS	0.0005991	0.0585621	2273/274/6876/7169/3757/6442/2314
KIRP	GO_BP_mammary_gland_involution_(GO:0060056)	0.00223153	0.145422	3488/1999
KIRP	GO_BP_negative_regulation_of_DNA_damage_response,_signal_transduction_by_p53_class_mediator_(GO:0043518)	0.00223153	0.145422	6615/960
KIRP	GO_BP_negative_regulation_of_cysteine-type_endopeptidase_activity_involved_in_apoptotic_process_(GO:0043154)	0.00622408	0.270326	7057/25816/960
KIRP	GO_BP_homeostasis_of_number_of_cells_within_a_tissue_(GO:0048873)	0.00652633	0.270326	54440/2624
KIRP	GO_BP_positive_regulation_of_phagocytosis_(GO:0050766)	0.00652633	0.270326	718/2624
KIRP	HALLMARK_TGF_BETA_SIGNALING	0.0069137	0.270326	4092/6711/7057
KIRP	GO_BP_positive_regulation_of_reactive_oxygen_species_metabolic_process_(GO:2000379)	0.010829	0.36015	5159/7057
KIRP	GO_BP_positive_regulation_of_angiogenesis_(GO:0045766)	0.0129953	0.36015	718/7057/2624
KIRP	GO_BP_intracellular_signal_transduction_(GO:0035556)	0.0133557	0.36015	695/4092/23371/3488/164656/25759
KIRP	GO_BP_hair_follicle_morphogenesis_(GO:0031069)	0.0138682	0.36015	3488/6615
KIRP	GO_BP_response_to_progesterone_stimulus_(GO:0032570)	0.0138682	0.36015	7057/1364
KIRP	HALLMARK_GLYCOLYSIS	0.0147959	0.36015	2239/2539/1999/3669/960
KIRP	GO_BP_regulation_of_calcium_ion_transport_via_voltage-gated_calcium_channel_activity_(GO:0051925)	0.0160753	0.36015	9033/775
KIRP	HALLMARK_COAGULATION	0.0176402	0.36015	718/7057/1465/164656
KIRP	GO_BP_cell_maturation_(GO:0048469)	0.018422	0.36015	695/2624
KIRP	GO_BP_positive_regulation_of_interferon-gamma_production_(GO:0032729)	0.018422	0.36015	3595/54440
KIRP	GO_BP_mesoderm_development_(GO:0007498)	0.0221941	0.382225	695/6615
KIRP	GO_BP_activation_of_phospholipase_C_activity_by_G-protein_coupled_receptor_protein_signaling_pathway_coupled_to_IP3_second_messenger_(GO:0007200)	0.0235166	0.382225	4883/3269
KIRP	GO_BP_base-excision_repair_(GO:0006284)	0.0248707	0.382225	5425/10309
KIRP	NABA_PROTEOGLYCANS	0.026256	0.382225	54829/63827
KIRP	GO_BP_muscle_organ_development_(GO:0007517)	0.0287925	0.382225	2273/6876/6442
KIRP	HALLMARK_APOPTOSIS	0.0290554	0.382225	4092/5159/3669/960
KIRP	GO_BP_positive_regulation_of_phosphatidylinositol_3-kinase_cascade_(GO:0014068)	0.0305938	0.382225	5777/5159
KIRP	GO_BP_negative_regulation_of_transforming_growth_factor_beta_receptor_signaling_pathway_(GO:0030512)	0.0320987	0.382225	4092/54829
KIRP	GO_BP_osteoblast_differentiation_(GO:0001649)	0.0320987	0.382225	6615/860
KIRP	GO_BP_epithelial_cell_differentiation_(GO:0030855)	0.0336322	0.382225	10170/1999
KIRP	GO_BP_positive_regulation_of_cell_migration_(GO:0030335)	0.03741	0.382225	5159/6615/7057
KIRP	GO_BP_positive_regulation_of_protein_kinase_B_signaling_cascade_(GO:0051897)	0.0451299	0.382225	3488/7057
KIRP	GO_BP_blood_coagulation_(GO:0007596)	0.0465052	0.382225	7454/5777/5136/57572/7057/139818/2624
LIHC	GO_BP_vasculature_development_(GO:0001944)	0.000272124	0.0176881	6425/7477
LIHC	GO_BP_response_to_nutrient_(GO:0007584)	0.00305883	0.0676693	178/340024
LIHC	GO_BP_Wnt_receptor_signaling_pathway_(GO:0016055)	0.00491215	0.0676693	6425/7477
LIHC	GO_BP_homeostatic_process_(GO:0042592)	0.00993572	0.0676693	7477
LIHC	GO_BP_embryonic_organ_development_(GO:0048568)	0.0109243	0.0676693	7477
LIHC	GO_BP_phosphatidylinositol_metabolic_process_(GO:0046488)	0.0109243	0.0676693	83394
LIHC	GO_BP_glycogen_biosynthetic_process_(GO:0005978)	0.0128986	0.0676693	178
LIHC	GO_BP_visual_perception_(GO:0007601)	0.0131114	0.0676693	6425/11281
LIHC	GO_BP_axis_specification_(GO:0009798)	0.0138844	0.0676693	7477
LIHC	GO_BP_negative_regulation_of_smoothened_signaling_pathway_(GO:0045879)	0.0138844	0.0676693	7477
LIHC	GO_BP_smooth_muscle_cell_differentiation_(GO:0051145)	0.0138844	0.0676693	7477
LIHC	GO_BP_negative_regulation_of_neurogenesis_(GO:0050768)	0.0148693	0.0676693	7477
LIHC	GO_BP_synapse_organization_(GO:0050808)	0.0148693	0.0676693	7477
LIHC	GO_BP_cellular_metabolic_process_(GO:0044237)	0.0158533	0.0676693	7477
LIHC	GO_BP_negative_regulation_of_protein_kinase_B_signaling_cascade_(GO:0051898)	0.0168364	0.0676693	6425
LIHC	GO_BP_glycogen_catabolic_process_(GO:0005980)	0.0178186	0.0676693	178
LIHC	GO_BP_amino_acid_transmembrane_transport_(GO:0003333)	0.0187999	0.0676693	340024
LIHC	GO_BP_biomineral_tissue_development_(GO:0031214)	0.0197802	0.0676693	286077
LIHC	GO_BP_establishment_or_maintenance_of_cell_polarity_(GO:0007163)	0.0197802	0.0676693	6425
LIHC	GO_BP_phototransduction_(GO:0007602)	0.0227159	0.0738268	58473
LIHC	GO_BP_gonad_development_(GO:0008406)	0.0256435	0.0757649	6425
LIHC	GO_BP_neuroprotection_(GO:0043526)	0.0256435	0.0757649	2562
LIHC	GO_BP_odontogenesis_(GO:0042476)	0.0295343	0.0834666	7477
LIHC	GO_BP_activation_of_JUN_kinase_activity_(GO:0007257)	0.0334108	0.0868682	7477
LIHC	GO_BP_neurotransmitter_transport_(GO:0006836)	0.0334108	0.0868682	340024
LIHC	GO_BP_amino_acid_transport_(GO:0006865)	0.0401603	0.100269	340024
LIHC	GO_BP_positive_regulation_of_osteoblast_differentiation_(GO:0045669)	0.0430396	0.100269	7477
LIHC	NABA_SECRETED_FACTORS	0.0445031	0.100269	6425/7477
LIHC	GO_BP_cellular_response_to_retinoic_acid_(GO:0071300)	0.0449547	0.100269	7477
LIHC	GO_BP_odontogenesis_of_dentin-containing_tooth_(GO:0042475)	0.0468663	0.100269	7477
LIHC	GO_BP_positive_regulation_of_JNK_cascade_(GO:0046330)	0.0478207	0.100269	7477
LUAD	GO_BP_ventricular_cardiac_muscle_cell_development_(GO:0055015)	0.00612485	0.0671566	2274
LUAD	GO_BP_cholesterol_catabolic_process_(GO:0006707)	0.00673553	0.0671566	8578
LUAD	GO_BP_heart_trabecula_formation_(GO:0060347)	0.00673553	0.0671566	2274
LUAD	GO_BP_cell_motility_(GO:0048870)	0.0079559	0.0671566	27286
LUAD	GO_BP_actin_filament-based_movement_(GO:0030048)	0.0103927	0.0671566	4643
LUAD	GO_BP_nitrogen_compound_metabolic_process_(GO:0006807)	0.0103927	0.0671566	4643
LUAD	GO_BP_regulation_of_phosphorylation_(GO:0042325)	0.0116091	0.0671566	27286
LUAD	GO_BP_platelet-derived_growth_factor_receptor_signaling_pathway_(GO:0048008)	0.0122169	0.0671566	4643
LUAD	GO_BP_dendrite_development_(GO:0016358)	0.0134313	0.0671566	8578
LUAD	GO_BP_osteoblast_differentiation_(GO:0001649)	0.0237017	0.0928311	2274
LUAD	GO_BP_positive_regulation_of_neuron_projection_development_(GO:0010976)	0.0249038	0.0928311	8578
LUAD	GO_BP_androgen_receptor_signaling_pathway_(GO:0030521)	0.0261046	0.0928311	2274
LUAD	GO_BP_receptor-mediated_endocytosis_(GO:0006898)	0.0296993	0.0928311	8578
LUAD	GO_BP_negative_regulation_of_phosphatase_activity_(GO:0010923)	0.0302973	0.0928311	1741
LUAD	GO_BP_vasculogenesis_(GO:0001570)	0.0320893	0.0928311	4643
LUAD	GO_BP_response_to_hormone_stimulus_(GO:0009725)	0.0332823	0.0928311	2274
LUAD	GO_BP_positive_regulation_of_MAPK_cascade_(GO:0043410)	0.0350695	0.0928311	84231
LUAD	GO_BP_cell-cell_adhesion_(GO:0016337)	0.0445524	0.108313	27286
LUAD	GO_BP_kidney_development_(GO:0001822)	0.045732	0.108313	4643
LUSC	GO_BP_anterior/posterior_pattern_specification_(GO:0009952)	3.18919e-07	3.44433e-05	7704/3207/3223/3221/3217
LUSC	GO_BP_positive_regulation_of_chondrocyte_differentiation_(GO:0032332)	0.000244621	0.0132095	7704/3207
LUSC	GO_BP_myeloid_cell_differentiation_(GO:0030099)	0.000409606	0.0147458	7704/3217
LUSC	GO_BP_metanephros_development_(GO:0001656)	0.00115037	0.0282745	3399/3207
LUSC	GO_BP_behavior_(GO:0007610)	0.001309	0.0282745	4128/7101
LUSC	GO_BP_response_to_wounding_(GO:0009611)	0.00453962	0.0770453	3399/11057
LUSC	GO_BP_cartilage_development_(GO:0051216)	0.00499368	0.0770453	7704/3221
LUSC	GO_BP_positive_regulation_of_angiogenesis_(GO:0045766)	0.00579507	0.0782334	23576/7101
LUSC	GO_BP_central_nervous_system_development_(GO:0007417)	0.0141125	0.0965918	7704/3399
LUSC	GO_BP_hormone_biosynthetic_process_(GO:0042446)	0.0167622	0.0965918	53905
LUSC	GO_BP_negative_regulation_of_astrocyte_differentiation_(GO:0048712)	0.0167622	0.0965918	7101
LUSC	GO_BP_notochord_development_(GO:0030903)	0.0167622	0.0965918	3399
LUSC	GO_BP_organ_induction_(GO:0001759)	0.0167622	0.0965918	3207
LUSC	GO_BP_dentate_gyrus_development_(GO:0021542)	0.0184235	0.0965918	7101
LUSC	GO_BP_positive_regulation_of_cartilage_development_(GO:0061036)	0.0184235	0.0965918	7704
LUSC	GO_BP_regulation_of_dendrite_morphogenesis_(GO:0048814)	0.0184235	0.0965918	7101
LUSC	GO_BP_regulation_of_DNA_replication_(GO:0006275)	0.0184235	0.0965918	3399
LUSC	GO_BP_long-term_synaptic_potentiation_(GO:0060291)	0.0200822	0.0965918	7101
LUSC	GO_BP_neurotransmitter_biosynthetic_process_(GO:0042136)	0.0200822	0.0965918	4128
LUSC	GO_BP_positive_regulation_of_ossification_(GO:0045778)	0.0200822	0.0965918	7704
LUSC	GO_BP_olfactory_bulb_development_(GO:0021772)	0.0217383	0.0965918	7101
LUSC	GO_BP_mesonephros_development_(GO:0001823)	0.0233916	0.0965918	7704
LUSC	GO_BP_nitric_oxide_mediated_signal_transduction_(GO:0007263)	0.0233916	0.0965918	23576
LUSC	GO_BP_nucleotide_biosynthetic_process_(GO:0009165)	0.0233916	0.0965918	5634
LUSC	GO_BP_steroid_hormone_mediated_signaling_pathway_(GO:0043401)	0.0233916	0.0965918	7101
LUSC	GO_BP_behavioral_fear_response_(GO:0001662)	0.0250423	0.0965918	7101
LUSC	GO_BP_nucleoside_metabolic_process_(GO:0009116)	0.0250423	0.0965918	5634
LUSC	GO_BP_superoxide_anion_generation_(GO:0042554)	0.0250423	0.0965918	53905
LUSC	GO_BP_hydrogen_peroxide_catabolic_process_(GO:0042744)	0.0299784	0.107922	53905
LUSC	GO_BP_positive_regulation_of_branching_involved_in_ureteric_bud_morphogenesis_(GO:0090190)	0.0299784	0.107922	3217
LUSC	GO_BP_DNA_damage_response,_signal_transduction_resulting_in_induction_of_apoptosis_(GO:0008630)	0.0332559	0.10907	57600
LUSC	GO_BP_positive_regulation_of_fat_cell_differentiation_(GO:0045600)	0.0332559	0.10907	7704
LUSC	GO_BP_positive_regulation_of_apoptotic_process_(GO:0043065)	0.033663	0.10907	7704/3399
LUSC	GO_BP_gastrulation_with_mouth_forming_second_(GO:0001702)	0.0348907	0.10907	26011
LUSC	GO_BP_proximal/distal_pattern_formation_(GO:0009954)	0.0365228	0.10907	3207
LUSC	GO_BP_regulation_of_protein_phosphorylation_(GO:0001932)	0.0365228	0.10907	57600
LUSC	GO_BP_positive_regulation_of_cell_cycle_(GO:0045787)	0.0397792	0.10907	7101
LUSC	GO_BP_embryonic_hindlimb_morphogenesis_(GO:0035116)	0.0414034	0.10907	7704
LUSC	GO_BP_embryonic_pattern_specification_(GO:0009880)	0.0414034	0.10907	7704
LUSC	GO_BP_somatic_stem_cell_maintenance_(GO:0035019)	0.043025	0.10907	7101
LUSC	HALLMARK_ESTROGEN_RESPONSE_EARLY	0.0442825	0.10907	6337/11057
LUSC	HALLMARK_ESTROGEN_RESPONSE_LATE	0.0442825	0.10907	6337/11057
LUSC	GO_BP_developmental_growth_(GO:0048589)	0.044644	0.10907	3207
LUSC	GO_BP_embryonic_skeletal_system_development_(GO:0048706)	0.0462604	0.10907	3223
LUSC	GO_BP_cell_fate_commitment_(GO:0045165)	0.0478742	0.10907	7101
LUSC	GO_BP_negative_regulation_of_osteoblast_differentiation_(GO:0045668)	0.0478742	0.10907	3399
LUSC	GO_BP_odontogenesis_(GO:0042476)	0.0494853	0.10907	3399
LUSC	GO_BP_sensory_perception_of_taste_(GO:0050909)	0.0494853	0.10907	6337
LUSC	GO_BP_social_behavior_(GO:0035176)	0.0494853	0.10907	7101
THCA	GO_BP_cellular_response_to_dexamethasone_stimulus_(GO:0071549)	3.17821e-06	0.000492623	358/7040
THCA	GO_BP_face_morphogenesis_(GO:0060325)	2.11555e-05	0.00163955	7040/6899
THCA	GO_BP_epithelial_cell_differentiation_(GO:0030855)	5.49199e-05	0.00225772	1282/6899
THCA	GO_BP_cellular_response_to_retinoic_acid_(GO:0071300)	7.28297e-05	0.00225772	358/6899
THCA	GO_BP_positive_regulation_of_epithelial_cell_proliferation_(GO:0050679)	7.28297e-05	0.00225772	7040/6899
THCA	GO_BP_positive_regulation_of_protein_phosphorylation_(GO:0001934)	0.000244344	0.00631222	7040/6899
THCA	GO_BP_angiogenesis_(GO:0001525)	0.000862768	0.0166591	1282/6899
THCA	HALLMARK_EPITHELIAL_MESENCHYMAL_TRANSITION	0.00137828	0.0166591	1282/7040
THCA	GO_BP_response_to_drug_(GO:0042493)	0.00274007	0.0166591	358/7040
THCA	GO_BP_cellular_homeostasis_(GO:0019725)	0.00306666	0.0166591	358
THCA	GO_BP_embryonic_viscerocranium_morphogenesis_(GO:0048703)	0.00306666	0.0166591	6899
THCA	GO_BP_lymph_node_development_(GO:0048535)	0.00306666	0.0166591	7040
THCA	GO_BP_negative_regulation_of_blood_vessel_endothelial_cell_migration_(GO:0043537)	0.00306666	0.0166591	7040
THCA	GO_BP_outflow_tract_septum_morphogenesis_(GO:0003148)	0.00306666	0.0166591	6899
THCA	GO_BP_hemopoietic_progenitor_cell_differentiation_(GO:0002244)	0.00337294	0.0166591	7040
THCA	GO_BP_mitotic_cell_cycle_G1/S_transition_checkpoint_(GO:0031575)	0.00337294	0.0166591	7040
THCA	GO_BP_positive_regulation_of_interleukin-17_production_(GO:0032740)	0.00337294	0.0166591	7040
THCA	GO_BP_cellular_response_to_fibroblast_growth_factor_stimulus_(GO:0044344)	0.00367914	0.0166591	6899
THCA	GO_BP_pathway-restricted_SMAD_protein_phosphorylation_(GO:0060389)	0.00367914	0.0166591	7040
THCA	GO_BP_positive_regulation_of_cellular_protein_metabolic_process_(GO:0032270)	0.00367914	0.0166591	7040
THCA	GO_BP_positive_regulation_of_peptidyl-threonine_phosphorylation_(GO:0010800)	0.00367914	0.0166591	7040
THCA	GO_BP_positive_regulation_of_protein_complex_assembly_(GO:0031334)	0.00367914	0.0166591	7040
THCA	GO_BP_regulation_of_sodium_ion_transport_(GO:0002028)	0.00367914	0.0166591	7040
THCA	GO_BP_virus-host_interaction_(GO:0019048)	0.00367914	0.0166591	7040
THCA	GO_BP_blood_vessel_morphogenesis_(GO:0048514)	0.00398528	0.0166591	6899
THCA	GO_BP_cell_fate_specification_(GO:0001708)	0.00398528	0.0166591	6899
THCA	GO_BP_cellular_response_to_stress_(GO:0033554)	0.00398528	0.0166591	358
THCA	GO_BP_positive_regulation_of_histone_acetylation_(GO:0035066)	0.00398528	0.0166591	7040
THCA	GO_BP_negative_regulation_of_ossification_(GO:0030279)	0.00429135	0.0166591	7040
THCA	GO_BP_pharyngeal_system_development_(GO:0060037)	0.00429135	0.0166591	6899
THCA	GO_BP_positive_regulation_of_blood_vessel_endothelial_cell_migration_(GO:0043536)	0.00429135	0.0166591	7040
THCA	GO_BP_retinoic_acid_receptor_signaling_pathway_(GO:0048384)	0.00429135	0.0166591	6899
THCA	GO_BP_positive_regulation_of_cell_proliferation_(GO:0008284)	0.0043302	0.0166591	7040/6899
THCA	GO_BP_cGMP_biosynthetic_process_(GO:0006182)	0.00459734	0.0166591	358
THCA	GO_BP_positive_regulation_of_cell_cycle_arrest_(GO:0071158)	0.00459734	0.0166591	7040
THCA	GO_BP_positive_regulation_of_collagen_biosynthetic_process_(GO:0032967)	0.00459734	0.0166591	7040
THCA	SA_MMP_CYTOKINE_CONNECTION	0.00459734	0.0166591	7040
THCA	GO_BP_negative_regulation_of_cell_differentiation_(GO:0045596)	0.00490327	0.0166591	6899
THCA	GO_BP_negative_regulation_of_mitotic_cell_cycle_(GO:0045930)	0.00490327	0.0166591	7040
THCA	GO_BP_regulation_of_transforming_growth_factor_beta_receptor_signaling_pathway_(GO:0017015)	0.00490327	0.0166591	7040
THCA	GO_BP_cochlea_morphogenesis_(GO:0090103)	0.00520912	0.0166591	6899
THCA	GO_BP_middle_ear_morphogenesis_(GO:0042474)	0.00520912	0.0166591	6899
THCA	GO_BP_positive_regulation_of_pathway-restricted_SMAD_protein_phosphorylation_(GO:0010862)	0.00520912	0.0166591	7040
THCA	GO_BP_response_to_vitamin_D_(GO:0033280)	0.00520912	0.0166591	7040
THCA	GO_BP_neuromuscular_junction_development_(GO:0007528)	0.0055149	0.0166591	1282
THCA	GO_BP_positive_regulation_of_branching_involved_in_ureteric_bud_morphogenesis_(GO:0090190)	0.0055149	0.0166591	7040
THCA	GO_BP_positive_regulation_of_epithelial_to_mesenchymal_transition_(GO:0010718)	0.0055149	0.0166591	7040
THCA	GO_BP_protein_export_from_nucleus_(GO:0006611)	0.0055149	0.0166591	7040
THCA	GO_BP_T_cell_homeostasis_(GO:0043029)	0.0055149	0.0166591	7040
THCA	GO_BP_thyroid_gland_development_(GO:0030878)	0.0055149	0.0166591	6899
THCA	GO_BP_phosphate-containing_compound_metabolic_process_(GO:0006796)	0.00582062	0.0166591	7040
THCA	GO_BP_positive_regulation_of_protein_secretion_(GO:0050714)	0.00582062	0.0166591	7040
THCA	GO_BP_artery_morphogenesis_(GO:0048844)	0.00612626	0.0166591	6899
THCA	GO_BP_cellular_response_to_cAMP_(GO:0071320)	0.00612626	0.0166591	358
THCA	GO_BP_cellular_response_to_UV_(GO:0034644)	0.00612626	0.0166591	358
THCA	GO_BP_digestive_tract_development_(GO:0048565)	0.00612626	0.0166591	7040
THCA	GO_BP_embryonic_cranial_skeleton_morphogenesis_(GO:0048701)	0.00612626	0.0166591	6899
THCA	GO_BP_negative_regulation_of_T_cell_proliferation_(GO:0042130)	0.00643183	0.0168972	7040
THCA	GO_BP_protein_import_into_nucleus,_translocation_(GO:0000060)	0.00643183	0.0168972	7040
THCA	GO_BP_negative_regulation_of_DNA_replication_(GO:0008156)	0.00673733	0.0173093	7040
THCA	GO_BP_cellular_response_to_hydrogen_peroxide_(GO:0070301)	0.00704277	0.0173093	358
THCA	GO_BP_positive_regulation_of_phosphatidylinositol_3-kinase_activity_(GO:0043552)	0.00704277	0.0173093	7040
THCA	GO_BP_inner_ear_development_(GO:0048839)	0.00734813	0.0173093	7040
THCA	GO_BP_positive_regulation_of_transcription,_DNA-dependent_(GO:0045893)	0.00739158	0.0173093	7040/6899
THCA	GO_BP_chondrocyte_differentiation_(GO:0002062)	0.00765342	0.0173093	7040
THCA	GO_BP_outflow_tract_morphogenesis_(GO:0003151)	0.00765342	0.0173093	6899
THCA	GO_BP_response_to_progesterone_stimulus_(GO:0032570)	0.00765342	0.0173093	7040
THCA	GO_BP_endoderm_development_(GO:0007492)	0.00795864	0.0173093	7040
THCA	GO_BP_mammary_gland_development_(GO:0030879)	0.00795864	0.0173093	7040
THCA	GO_BP_negative_regulation_of_fat_cell_differentiation_(GO:0045599)	0.00795864	0.0173093	7040
THCA	GO_BP_protein_kinase_B_signaling_cascade_(GO:0043491)	0.00795864	0.0173093	7040
THCA	GO_BP_lipopolysaccharide-mediated_signaling_pathway_(GO:0031663)	0.00826379	0.0173093	7040
THCA	GO_BP_positive_regulation_of_bone_mineralization_(GO:0030501)	0.00826379	0.0173093	7040
THCA	GO_BP_response_to_radiation_(GO:0009314)	0.00826379	0.0173093	7040
THCA	GO_BP_negative_regulation_of_protein_phosphorylation_(GO:0001933)	0.00856887	0.017709	7040
THCA	GO_BP_positive_regulation_of_mesenchymal_cell_proliferation_(GO:0002053)	0.00887387	0.018098	6899
THCA	GO_BP_odontogenesis_(GO:0042476)	0.00917881	0.0182399	358
THCA	GO_BP_social_behavior_(GO:0035176)	0.00917881	0.0182399	6899
THCA	GO_BP_myelination_(GO:0042552)	0.00948368	0.0182797	7040
THCA	GO_BP_thymus_development_(GO:0048538)	0.00948368	0.0182797	6899
THCA	GO_BP_ATP_biosynthetic_process_(GO:0006754)	0.00978848	0.0182797	7040
THCA	GO_BP_mesoderm_development_(GO:0007498)	0.00978848	0.0182797	6899
THCA	GO_BP_positive_regulation_of_MAP_kinase_activity_(GO:0043406)	0.00978848	0.0182797	7040
THCA	GO_BP_cellular_response_to_amino_acid_stimulus_(GO:0071230)	0.0100932	0.0186244	1282
THCA	GO_BP_cellular_response_to_organic_cyclic_compound_(GO:0071407)	0.0107024	0.0192893	7040
THCA	GO_BP_positive_regulation_of_peptidyl-serine_phosphorylation_(GO:0033138)	0.0107024	0.0192893	7040
THCA	GO_BP_heart_morphogenesis_(GO:0003007)	0.011007	0.0193873	6899
THCA	GO_BP_neural_crest_cell_migration_(GO:0001755)	0.011007	0.0193873	6899
THCA	GO_BP_negative_regulation_of_epithelial_cell_proliferation_(GO:0050680)	0.0113114	0.0194486	7040
THCA	GO_BP_water_transport_(GO:0006833)	0.0113114	0.0194486	358
THCA	GO_BP_determination_of_left/right_symmetry_(GO:0007368)	0.0116158	0.0194486	6899
THCA	GO_BP_ureteric_bud_development_(GO:0001657)	0.0116158	0.0194486	7040
THCA	GO_BP_cellular_response_to_hypoxia_(GO:0071456)	0.0119201	0.0194486	358
THCA	GO_BP_positive_regulation_of_fibroblast_proliferation_(GO:0048146)	0.0119201	0.0194486	358
THCA	GO_BP_potassium_ion_transmembrane_transport_(GO:0071805)	0.0119201	0.0194486	358
THCA	NABA_BASEMENT_MEMBRANES	0.0122243	0.0197372	1282
THCA	GO_BP_negative_regulation_of_cell_cycle_(GO:0045786)	0.0125285	0.0200198	7040
THCA	GO_BP_cellular_response_to_growth_factor_stimulus_(GO:0071363)	0.0134406	0.0208329	7040
THCA	GO_BP_regulation_of_cell_migration_(GO:0030334)	0.0134406	0.0208329	7040
THCA	NABA_COLLAGENS	0.0134406	0.0208329	1282
THCA	GO_BP_positive_regulation_of_cell_division_(GO:0051781)	0.0137445	0.021093	7040
THCA	GO_BP_blood_vessel_development_(GO:0001568)	0.014352	0.0215977	6899
THCA	GO_BP_positive_regulation_of_protein_kinase_B_signaling_cascade_(GO:0051897)	0.014352	0.0215977	7040
THCA	GO_BP_odontogenesis_of_dentin-containing_tooth_(GO:0042475)	0.0146557	0.0218426	6899
THCA	GO_BP_organ_regeneration_(GO:0031100)	0.0149593	0.0220828	7040
THCA	GO_BP_cellular_response_to_mechanical_stimulus_(GO:0071260)	0.0158697	0.0229888	358
THCA	GO_BP_inner_ear_morphogenesis_(GO:0042472)	0.0158697	0.0229888	6899
THCA	HALLMARK_TGF_BETA_SIGNALING	0.0164762	0.0236465	7040
THCA	GO_BP_cell-cell_junction_organization_(GO:0045216)	0.0173856	0.0247226	7040
THCA	GO_BP_positive_regulation_of_MAPK_cascade_(GO:0043410)	0.0176886	0.0249248	6899
THCA	GO_BP_response_to_wounding_(GO:0009611)	0.0182943	0.0255461	7040
THCA	GO_BP_transforming_growth_factor_beta_receptor_signaling_pathway_(GO:0007179)	0.0195049	0.0269934	7040
THCA	GO_BP_cellular_calcium_ion_homeostasis_(GO:0006874)	0.0198074	0.0271694	7040
THCA	GO_BP_response_to_glucose_stimulus_(GO:0009749)	0.0204122	0.0277534	7040
THCA	GO_BP_positive_regulation_of_angiogenesis_(GO:0045766)	0.0207144	0.0279194	358
THCA	GO_BP_MAPK_cascade_(GO:0000165)	0.0213188	0.0284863	7040
THCA	GO_BP_female_pregnancy_(GO:0007565)	0.0219228	0.029043	7040
THCA	GO_BP_platelet_degranulation_(GO:0002576)	0.0243362	0.0319671	7040
THCA	GO_BP_response_to_estradiol_stimulus_(GO:0032355)	0.0252401	0.0328758	7040
THCA	GO_BP_pattern_specification_process_(GO:0007389)	0.0258424	0.0333797	6899
THCA	HALLMARK_IL6_JAK_STAT3_SIGNALING	0.0264443	0.0338749	7040
THCA	GO_BP_anterior/posterior_pattern_specification_(GO:0009952)	0.027046	0.0343617	6899
THCA	GO_BP_viral_infectious_cycle_(GO:0019058)	0.0276474	0.0348402	7040
THCA	GO_BP_muscle_organ_development_(GO:0007517)	0.027948	0.034935	6899
THCA	GO_BP_positive_regulation_of_NF-kappaB_transcription_factor_activity_(GO:0051092)	0.0291497	0.0361456	7040
THCA	GO_BP_positive_regulation_of_gene_expression_(GO:0010628)	0.0312499	0.0381397	7040
THCA	GO_BP_sensory_perception_of_sound_(GO:0007605)	0.0312499	0.0381397	6899
THCA	GO_BP_aging_(GO:0007568)	0.0324486	0.0392932	7040
THCA	GO_BP_negative_regulation_of_cell_growth_(GO:0030308)	0.0342444	0.0411464	7040
THCA	GO_BP_embryo_development_(GO:0009790)	0.0369335	0.0440361	7040
THCA	GO_BP_cell_cycle_arrest_(GO:0007050)	0.0393191	0.0465199	7040
THCA	GO_BP_epidermal_growth_factor_receptor_signaling_pathway_(GO:0007173)	0.039617	0.0465199	7040
THCA	GO_BP_heart_development_(GO:0007507)	0.0449671	0.0524052	6899
THCA	GO_BP_potassium_ion_transport_(GO:0006813)	0.0470416	0.0544138	358
THCA	GO_BP_cell_death_(GO:0008219)	0.0482256	0.0553701	7040
